# Supplementary material for: A label-free approach to detect ligand binding to cell surface proteins in real time
Source: eLife journal article supplement (doi:10.7554/elife.34944), 2018-04-26
Supplement: supp [file Fig1b.xlsx]

## Sheet: 16922003-4.abf
	current (pA)
Time (ms)	30 uM 5-HT	100 uM cocaine
0	-0.724929	-0.0537206
0.0999985	-0.723333	-0.0518221
0.199997	-0.717648	-0.04808
0.300003	-0.708053	-0.0424068
0.400002	-0.694787	-0.0347966
0.5	-0.678121	-0.025343
0.599998	-0.658351	-0.0142033
0.699997	-0.635738	-0.00160645
0.800003	-0.610526	0.0121987
0.900002	-0.582954	0.0269072
1	-0.553277	0.0421935
1.1	-0.521725	0.0577286
1.2	-0.488528	0.0731884
1.3	-0.45391	0.0882572
1.4	-0.418111	0.10267
1.5	-0.381384	0.11621
1.6	-0.343996	0.128658
1.7	-0.306252	0.139848
1.8	-0.268514	0.14967
1.9	-0.231185	0.158054
2	-0.194706	0.164972
2.1	-0.15953	0.170386
2.2	-0.126107	0.174315
2.3	-0.0948938	0.176783
2.4	-0.0663491	0.177859
2.5	-0.0409021	0.17763
2.6	-0.0189249	0.176197
2.7	-0.00070043	0.173654
2.8	0.0135567	0.170113
2.9	0.0237133	0.165664
3	0.0297378	0.160389
3.1	0.0317125	0.154387
3.2	0.0298589	0.147742
3.3	0.024492	0.140489
3.4	0.0159847	0.132688
3.5	0.00476951	0.124362
3.6	-0.00865451	0.115504
3.7	-0.0237484	0.106091
3.8	-0.0399465	0.0960549
3.9	-0.0566408	0.0853318
4	-0.0732357	0.0738245
4.1	-0.0891955	0.0614676
4.2	-0.104022	0.0481932
4.3	-0.117275	0.0339784
4.4	-0.128573	0.0188102
4.5	-0.137596	0.00270053
4.6	-0.144113	-0.0142598
4.7	-0.148014	-0.0319392
4.8	-0.149303	-0.0501756
4.9	-0.148087	-0.0687179
5	-0.144553	-0.0872938
5.1	-0.139031	-0.105627
5.2	-0.131939	-0.123416
5.3	-0.123792	-0.140327
5.4	-0.115183	-0.156066
5.5	-0.106709	-0.170351
5.6	-0.0989923	-0.182952
5.7	-0.0926861	-0.193702
5.8	-0.0884131	-0.20246
5.9	-0.0867384	-0.209156
6	-0.0881347	-0.213779
6.1	-0.0929804	-0.216402
6.2	-0.101542	-0.217185
6.3	-0.113947	-0.216328
6.4	-0.130192	-0.21407
6.5	-0.150177	-0.21067
6.6	-0.173659	-0.206417
6.7	-0.200266	-0.201606
6.8	-0.229542	-0.196547
6.9	-0.260959	-0.191562
7	-0.293969	-0.186933
7.1	-0.327997	-0.182902
7.2	-0.362461	-0.179679
7.3	-0.396795	-0.177429
7.4	-0.430476	-0.176287
7.5	-0.463045	-0.17631
7.6	-0.494094	-0.177481
7.7	-0.5233	-0.179732
7.8	-0.550426	-0.182963
7.9	-0.575294	-0.18706
8	-0.597796	-0.191871
8.1	-0.617876	-0.197207
8.2	-0.635558	-0.20284
8.3	-0.650932	-0.208528
8.4	-0.664122	-0.214033
8.5	-0.675276	-0.219136
8.6	-0.684581	-0.223656
8.7	-0.692241	-0.227427
8.8	-0.698461	-0.230319
8.9	-0.70344	-0.232241
9	-0.70736	-0.233133
9.1	-0.710402	-0.232995
9.2	-0.712747	-0.231867
9.3	-0.71457	-0.229807
9.4	-0.716034	-0.226966
9.5	-0.71726	-0.223532
9.6	-0.71833	-0.219722
9.7	-0.719324	-0.215804
9.8	-0.720282	-0.212072
9.9	-0.721241	-0.208784
10	-0.722227	-0.206207
10.1	-0.72322	-0.204634
10.2	-0.724175	-0.204334
10.3	-0.725015	-0.205513
10.4	-0.725621	-0.208307
10.5	-0.725871	-0.212774
10.6	-0.725613	-0.21887
10.7	-0.724678	-0.226485
10.8	-0.722886	-0.235437
10.9	-0.720032	-0.245433
11	-0.715904	-0.256087
11.1	-0.710326	-0.26699
11.2	-0.703158	-0.277648
11.3	-0.694279	-0.287528
11.4	-0.683588	-0.296122
11.5	-0.671026	-0.302943
11.6	-0.6566	-0.307549
11.7	-0.640384	-0.309572
11.8	-0.622531	-0.308783
11.9	-0.603277	-0.305043
12	-0.582891	-0.298347
12.1	-0.56167	-0.288783
12.2	-0.539982	-0.276583
12.3	-0.518249	-0.26209
12.4	-0.496883	-0.245725
12.5	-0.476308	-0.227994
12.6	-0.45695	-0.209415
12.7	-0.439198	-0.190519
12.8	-0.423408	-0.171826
12.9	-0.409915	-0.153804
13	-0.398988	-0.136874
13.1	-0.390806	-0.121343
13.2	-0.38548	-0.10741
13.3	-0.383037	-0.0951608
13.4	-0.383459	-0.0845455
13.5	-0.386659	-0.0754219
13.6	-0.392453	-0.0675705
13.7	-0.400578	-0.0606976
13.8	-0.410705	-0.0544102
13.9	-0.42241	-0.0482857
14	-0.435216	-0.0419059
14.1	-0.448611	-0.0348775
14.2	-0.462066	-0.0268354
14.3	-0.475035	-0.017418
14.4	-0.486948	-0.00635354
14.5	-0.497228	0.00652658
14.6	-0.505355	0.0212959
14.7	-0.510909	0.0379154
14.8	-0.51352	0.0562524
14.9	-0.512922	0.0760774
15	-0.508933	0.097079
15.1	-0.501511	0.118884
15.2	-0.490763	0.141072
15.3	-0.476912	0.163206
15.4	-0.460313	0.184863
15.5	-0.441443	0.20558
15.6	-0.420871	0.224954
15.7	-0.399189	0.242621
15.8	-0.377012	0.2583
15.9	-0.35495	0.271792
16	-0.333621	0.282945
16.1	-0.313605	0.291693
16.2	-0.295382	0.298066
16.3	-0.279327	0.30217
16.4	-0.265711	0.304153
16.5	-0.254699	0.304255
16.6	-0.246335	0.302765
16.7	-0.240587	0.29999
16.8	-0.237345	0.296254
16.9	-0.236428	0.291889
17	-0.237587	0.287223
17.1	-0.240551	0.282619
17.2	-0.245025	0.278377
17.3	-0.250699	0.27478
17.4	-0.257283	0.272081
17.5	-0.264539	0.270501
17.6	-0.272252	0.270228
17.7	-0.280235	0.271371
17.8	-0.288328	0.273986
17.9	-0.296334	0.278057
18	-0.304049	0.283521
18.1	-0.311285	0.290264
18.2	-0.317845	0.298114
18.3	-0.323538	0.306814
18.4	-0.328188	0.316067
18.5	-0.331594	0.325545
18.6	-0.333555	0.334859
18.7	-0.33387	0.343654
18.8	-0.332361	0.351577
18.9	-0.328892	0.358308
19	-0.323381	0.363539
19.1	-0.315798	0.367016
19.2	-0.306188	0.368499
19.3	-0.294642	0.367846
19.4	-0.281307	0.364997
19.5	-0.266398	0.359942
19.6	-0.250175	0.352722
19.7	-0.232909	0.343469
19.8	-0.214887	0.332373
19.9	-0.196452	0.319631
20	-0.177943	0.305459
20.1	-0.159664	0.290113
20.2	-0.141886	0.273872
20.3	-0.124838	0.256993
20.4	-0.10872	0.239781
20.5	-0.093699	0.222496
20.6	-0.079881	0.205408
20.7	-0.0673233	0.18877
20.8	-0.0560325	0.172816
20.9	-0.0459573	0.157811
21	-0.037053	0.144005
21.1	-0.029248	0.13163
21.2	-0.0224467	0.120881
21.3	-0.0165491	0.111929
21.4	-0.0114423	0.104933
21.5	-0.00700311	0.100003
21.6	-0.00313406	0.097245
21.7	0.000265918	0.0967021
21.8	0.00328672	0.0983317
21.9	0.00596103	0.102024
22	0.00829285	0.107621
22.1	0.0102834	0.114919
22.2	0.0119314	0.123613
22.3	0.0132004	0.133339
22.4	0.014037	0.143729
22.5	0.0143881	0.154387
22.6	0.0142154	0.16489
22.7	0.0134856	0.174836
22.8	0.0121301	0.183864
22.9	0.0101048	0.191613
23	0.00738192	0.197801
23.1	0.00398707	0.202183
23.2	-3.84595e-05	0.204597
23.3	-0.00465723	0.204967
23.4	-0.00981088	0.203277
23.5	-0.0154231	0.199584
23.6	-0.0214157	0.193984
23.7	-0.0277326	0.186623
23.8	-0.0343455	0.177681
23.9	-0.0412292	0.167347
24	-0.048352	0.155804
24.1	-0.0557158	0.143254
24.2	-0.0633682	0.129866
24.3	-0.0713423	0.115812
24.4	-0.0796742	0.101216
24.5	-0.0884162	0.0861592
24.6	-0.0976251	0.0707372
24.7	-0.107338	0.0550452
24.8	-0.117548	0.0391301
24.9	-0.128215	0.0230788
25	-0.139261	0.00700055
25.1	-0.15056	-0.008988
25.2	-0.161957	-0.0247601
25.3	-0.173264	-0.0401554
25.4	-0.184259	-0.0549985
25.5	-0.194697	-0.0690787
25.6	-0.204321	-0.0821805
25.7	-0.212841	-0.0940578
25.8	-0.219992	-0.104473
25.9	-0.225576	-0.11322
26	-0.229454	-0.120101
26.1	-0.231542	-0.124938
26.2	-0.231808	-0.127623
26.3	-0.230269	-0.128126
26.4	-0.227001	-0.126445
26.5	-0.222153	-0.122607
26.6	-0.215931	-0.116686
26.7	-0.208584	-0.108801
26.8	-0.20038	-0.0991056
26.9	-0.19161	-0.0878218
27	-0.182546	-0.0751801
27.1	-0.173439	-0.0614378
27.2	-0.1645	-0.0468296
27.3	-0.155922	-0.0315987
27.4	-0.147847	-0.0159738
27.5	-0.140335	-0.00015346
27.6	-0.133416	0.0156602
27.7	-0.127086	0.0312611
27.8	-0.121306	0.0464596
27.9	-0.11596	0.0610565
28	-0.110923	0.0748684
28.1	-0.106102	0.0877075
28.2	-0.101388	0.099406
28.3	-0.0966763	0.109794
28.4	-0.0919027	0.118683
28.5	-0.0870401	0.125922
28.6	-0.0820995	0.131382
28.7	-0.0771279	0.134914
28.8	-0.0722115	0.136452
28.9	-0.0674977	0.135936
29	-0.0631465	0.133346
29.1	-0.0593188	0.128722
29.2	-0.0561754	0.122193
29.3	-0.0538763	0.113941
29.4	-0.0525924	0.104165
29.5	-0.0524882	0.0931296
29.6	-0.0536881	0.0811226
29.7	-0.0563098	0.0684424
29.8	-0.0604536	0.0554198
29.9	-0.0661938	0.0424221
30	-0.0735587	0.0297886
30.1	-0.0825586	0.0178226
30.2	-0.0932054	0.0068065
30.3	-0.105509	-0.00303467
30.4	-0.11945	-0.0115424
30.5	-0.134998	-0.0185979
30.6	-0.152105	-0.0241447
30.7	-0.170697	-0.0282076
30.8	-0.190621	-0.0308676
30.9	-0.211708	-0.0322323
31	-0.233794	-0.0324728
31.1	-0.256688	-0.0318017
31.2	-0.280137	-0.0304362
31.3	-0.303819	-0.0286159
31.4	-0.327372	-0.0265951
31.5	-0.350415	-0.0246069
31.6	-0.372543	-0.022879
31.7	-0.393338	-0.0215946
31.8	-0.412395	-0.0208939
31.9	-0.42935	-0.0208853
32	-0.443859	-0.0216208
32.1	-0.455624	-0.0230773
32.2	-0.464446	-0.0251946
32.3	-0.470242	-0.0278241
32.4	-0.473032	-0.0307806
32.5	-0.472947	-0.0338268
32.6	-0.470235	-0.0367204
32.7	-0.465251	-0.0391983
32.8	-0.458445	-0.0409542
32.9	-0.450358	-0.0416924
33	-0.441595	-0.0411404
33.1	-0.432774	-0.039074
33.2	-0.424537	-0.0353053
33.3	-0.417506	-0.029716
33.4	-0.412233	-0.0222116
33.5	-0.409171	-0.0127676
33.6	-0.40868	-0.00141524
33.7	-0.411008	0.0117224
33.8	-0.416284	0.0264726
33.9	-0.424465	0.0426536
34	-0.435329	0.0600684
34.1	-0.448514	0.0784722
34.2	-0.463567	0.0976504
34.3	-0.479929	0.117391
34.4	-0.496944	0.137466
34.5	-0.513896	0.157624
34.6	-0.530061	0.177671
34.7	-0.544765	0.197412
34.8	-0.557385	0.21669
34.9	-0.56735	0.235388
35	-0.574211	0.253392
35.1	-0.57765	0.270594
35.2	-0.577492	0.286871
35.3	-0.5737	0.302109
35.4	-0.566382	0.316174
35.5	-0.555802	0.328964
35.6	-0.542341	0.340346
35.7	-0.526464	0.350184
35.8	-0.50872	0.358396
35.9	-0.48973	0.36491
36	-0.470134	0.369671
36.1	-0.450542	0.372638
36.2	-0.431545	0.373751
36.3	-0.413713	0.372984
36.4	-0.39754	0.370387
36.5	-0.383419	0.366066
36.6	-0.371631	0.360157
36.7	-0.362339	0.35285
36.8	-0.355616	0.344365
36.9	-0.351419	0.334993
37	-0.349608	0.325031
37.1	-0.349953	0.314803
37.2	-0.352151	0.304636
37.3	-0.355847	0.294894
37.4	-0.360618	0.285954
37.5	-0.365998	0.278159
37.6	-0.371522	0.271841
37.7	-0.376732	0.267279
37.8	-0.381165	0.264699
37.9	-0.384408	0.264238
38	-0.386124	0.265977
38.1	-0.386062	0.269914
38.2	-0.384027	0.276003
38.3	-0.379887	0.28406
38.4	-0.373576	0.293876
38.5	-0.365112	0.305193
38.6	-0.354628	0.317695
38.7	-0.3423	0.330999
38.8	-0.328358	0.344708
38.9	-0.313044	0.358407
39	-0.296617	0.371705
39.1	-0.279331	0.384237
39.2	-0.261451	0.395655
39.3	-0.243262	0.405673
39.4	-0.225026	0.414062
39.5	-0.206955	0.420664
39.6	-0.189196	0.425381
39.7	-0.171838	0.428169
39.8	-0.154942	0.429043
39.9	-0.138571	0.428092
40	-0.122776	0.425466
40.1	-0.107596	0.421341
40.2	-0.0930472	0.415932
40.3	-0.0791396	0.409475
40.4	-0.0659124	0.402175
40.5	-0.0534315	0.394285
40.6	-0.0417649	0.386057
40.7	-0.0310059	0.377732
40.8	-0.0212816	0.369499
40.9	-0.0127091	0.361524
41	-0.00539328	0.353932
41.1	0.000558525	0.34682
41.2	0.00505723	0.340245
41.3	0.00802939	0.334229
41.4	0.00941346	0.328724
41.5	0.00919131	0.323689
41.6	0.00741899	0.319047
41.7	0.00421381	0.314694
41.8	-0.000275168	0.310502
41.9	-0.00587908	0.306313
42	-0.0124102	0.301956
42.1	-0.0196622	0.297247
42.2	-0.0274151	0.292044
42.3	-0.0354419	0.286193
42.4	-0.0435399	0.279534
42.5	-0.0515485	0.271917
42.6	-0.0593082	0.263238
42.7	-0.0666616	0.253441
42.8	-0.0735113	0.242479
42.9	-0.0798491	0.23031
43	-0.0856894	0.216955
43.1	-0.0910878	0.202481
43.2	-0.0961261	0.186995
43.3	-0.100912	0.170623
43.4	-0.105555	0.153506
43.5	-0.110153	0.135824
43.6	-0.114808	0.117809
43.7	-0.11961	0.0996673
43.8	-0.124573	0.081594
43.9	-0.12965	0.0637831
44	-0.134779	0.0463955
44.1	-0.139855	0.0296183
44.2	-0.144714	0.0135982
44.3	-0.149135	-0.00159113
44.4	-0.152895	-0.0159201
44.5	-0.155766	-0.0293929
44.6	-0.157522	-0.0420484
44.7	-0.157967	-0.0539399
44.8	-0.156924	-0.0651525
44.9	-0.154262	-0.0757688
45	-0.149894	-0.0859009
45.1	-0.143841	-0.0956381
45.2	-0.136207	-0.105068
45.3	-0.127165	-0.114258
45.4	-0.116985	-0.123231
45.5	-0.106011	-0.131996
45.6	-0.0946352	-0.14052
45.7	-0.0832692	-0.148696
45.8	-0.0723438	-0.156399
45.9	-0.0622549	-0.163471
46	-0.0534059	-0.169752
46.1	-0.0461366	-0.175083
46.2	-0.0407443	-0.179274
46.3	-0.0374652	-0.18217
46.4	-0.0364693	-0.183686
46.5	-0.0378339	-0.183793
46.6	-0.0415645	-0.182462
46.7	-0.0476047	-0.179723
46.8	-0.0558335	-0.175697
46.9	-0.0660396	-0.170542
47	-0.0779819	-0.164473
47.1	-0.0914094	-0.157773
47.2	-0.106029	-0.150753
47.3	-0.12153	-0.143714
47.4	-0.137621	-0.136934
47.5	-0.154017	-0.130672
47.6	-0.170483	-0.125147
47.7	-0.186829	-0.120524
47.8	-0.202893	-0.116902
47.9	-0.218528	-0.11431
48	-0.233641	-0.112676
48.1	-0.248164	-0.111842
48.2	-0.262074	-0.111591
48.3	-0.275348	-0.111651
48.4	-0.287965	-0.111751
48.5	-0.299922	-0.111613
48.6	-0.311256	-0.111002
48.7	-0.321995	-0.109687
48.8	-0.332137	-0.107469
48.9	-0.341681	-0.104226
49	-0.350633	-0.0999449
49.1	-0.358972	-0.0947142
49.2	-0.366661	-0.0886958
49.3	-0.373669	-0.0821671
49.4	-0.379962	-0.0754438
49.5	-0.385515	-0.0688941
49.6	-0.390309	-0.0629205
49.7	-0.394349	-0.0579502
49.8	-0.397608	-0.0543665
49.9	-0.400068	-0.0524973
50	-0.401736	-0.0526253
50.1	-0.402658	-0.0549382
50.2	-0.402871	-0.0595618
50.3	-0.402432	-0.0665076
50.4	-0.40142	-0.0756677
50.5	-0.399908	-0.0868421
50.6	-0.397953	-0.0997999
50.7	-0.395598	-0.114239
50.8	-0.392897	-0.129773
50.9	-0.389875	-0.145996
51	-0.386538	-0.162473
51.1	-0.38291	-0.178811
51.2	-0.379014	-0.194634
51.3	-0.374844	-0.209574
51.4	-0.370399	-0.223277
51.5	-0.365674	-0.235453
51.6	-0.360672	-0.245857
51.7	-0.3554	-0.254288
51.8	-0.349902	-0.260573
51.9	-0.344231	-0.264601
52	-0.338403	-0.26627
52.1	-0.332446	-0.265521
52.2	-0.326394	-0.262327
52.3	-0.320268	-0.256666
52.4	-0.314106	-0.248528
52.5	-0.307971	-0.237941
52.6	-0.301939	-0.224972
52.7	-0.29607	-0.209736
52.8	-0.290445	-0.192351
52.9	-0.285176	-0.173002
53	-0.280385	-0.15188
53.1	-0.276194	-0.129224
53.2	-0.272751	-0.105296
53.3	-0.270215	-0.0803668
53.4	-0.268739	-0.0547559
53.5	-0.268474	-0.0287924
53.6	-0.269564	-0.00284975
53.7	-0.272145	0.022718
53.8	-0.276317	0.0475763
53.9	-0.282106	0.0714258
54	-0.289435	0.0940181
54.1	-0.298208	0.11513
54.2	-0.30827	0.13462
54.3	-0.319369	0.152381
54.4	-0.33115	0.168402
54.5	-0.343195	0.182708
54.6	-0.355046	0.195381
54.7	-0.366208	0.206554
54.8	-0.376168	0.216384
54.9	-0.384435	0.225051
55	-0.390514	0.232744
55.1	-0.393942	0.239665
55.2	-0.394317	0.246004
55.3	-0.39133	0.25189
55.4	-0.384732	0.257418
55.5	-0.374396	0.262638
55.6	-0.360281	0.267586
55.7	-0.342461	0.272251
55.8	-0.32109	0.276586
55.9	-0.296425	0.280486
56	-0.268818	0.28381
56.1	-0.238685	0.286413
56.2	-0.206495	0.288158
56.3	-0.172788	0.288929
56.4	-0.138125	0.288648
56.5	-0.103089	0.287222
56.6	-0.0682361	0.284621
56.7	-0.0341149	0.280848
56.8	-0.00125067	0.275921
56.9	0.0298967	0.269923
57	0.0589481	0.262973
57.1	0.0856096	0.255223
57.2	0.109666	0.246844
57.3	0.131001	0.23804
57.4	0.149578	0.228992
57.5	0.165493	0.219907
57.6	0.178951	0.210994
57.7	0.190219	0.202477
57.8	0.199603	0.194515
57.9	0.207485	0.187222
58	0.214299	0.18072
58.1	0.220491	0.175097
58.2	0.226459	0.170392
58.3	0.232589	0.166605
58.4	0.239238	0.163702
58.5	0.24667	0.161611
58.6	0.255057	0.160246
58.7	0.264484	0.159479
58.8	0.27497	0.159165
58.9	0.286461	0.159151
59	0.298803	0.15928
59.1	0.311784	0.159404
59.2	0.325089	0.15939
59.3	0.338354	0.159098
59.4	0.351226	0.158382
59.5	0.363333	0.157134
59.6	0.374289	0.155299
59.7	0.383751	0.152862
59.8	0.391445	0.149809
59.9	0.397145	0.146171
60	0.400675	0.141977
60.1	0.401952	0.137282
60.2	0.40097	0.132204
60.3	0.397786	0.126846
60.4	0.392542	0.121274
60.5	0.385473	0.115593
60.6	0.376869	0.10997
60.7	0.36702	0.104565
60.8	0.356248	0.0994909
60.9	0.344871	0.0949017
61	0.333163	0.0909409
61.1	0.321377	0.0877278
61.2	0.309727	0.0853806
61.3	0.298366	0.0839947
61.4	0.287358	0.0836675
61.5	0.276712	0.0844913
61.6	0.266344	0.0865415
61.7	0.256102	0.0898267
61.8	0.245805	0.0943288
61.9	0.235248	0.100032
62	0.224232	0.106847
62.1	0.212596	0.114651
62.2	0.200206	0.123276
62.3	0.186955	0.132512
62.4	0.172789	0.142152
62.5	0.157731	0.151935
62.6	0.141901	0.161612
62.7	0.125484	0.170913
62.8	0.108728	0.179587
62.9	0.0919266	0.187389
63	0.0754171	0.194054
63.1	0.0595562	0.19937
63.2	0.0447125	0.203188
63.3	0.0312437	0.205414
63.4	0.0194953	0.205973
63.5	0.00976321	0.204857
63.6	0.00225713	0.202073
63.7	-0.0028808	0.19767
63.8	-0.00556822	0.191744
63.9	-0.00578126	0.184451
64	-0.00357039	0.175929
64.1	0.000936723	0.166327
64.2	0.00755435	0.155758
64.3	0.0160448	0.144341
64.4	0.0261259	0.132182
64.5	0.0375153	0.119408
64.6	0.0499227	0.10609
64.7	0.0630668	0.0922791
64.8	0.0766591	0.0780339
64.9	0.0904062	0.063373
65	0.104032	0.0483448
65.1	0.117295	0.0330343
65.2	0.129993	0.0175407
65.3	0.141958	0.00194032
65.4	0.153034	-0.0136666
65.5	0.163049	-0.0291631
65.6	0.171845	-0.0443954
65.7	0.179333	-0.0591851
65.8	0.185411	-0.0733665
65.9	0.189989	-0.0867733
66	0.192987	-0.0992456
66.1	0.194345	-0.110651
66.2	0.194036	-0.120864
66.3	0.192001	-0.129802
66.4	0.188218	-0.137431
66.5	0.182741	-0.143746
66.6	0.17565	-0.148804
66.7	0.167051	-0.152697
66.8	0.157082	-0.155543
66.9	0.145888	-0.157521
67	0.133634	-0.158799
67.1	0.120496	-0.15954
67.2	0.106645	-0.159924
67.3	0.0922502	-0.160106
67.4	0.0774276	-0.160235
67.5	0.0622657	-0.160441
67.6	0.0468463	-0.160829
67.7	0.031187	-0.161456
67.8	0.015236	-0.162307
67.9	-0.00105568	-0.163347
68	-0.0177295	-0.164537
68.1	-0.0348294	-0.165846
68.2	-0.0523853	-0.167197
68.3	-0.0704245	-0.168496
68.4	-0.0889333	-0.169639
68.5	-0.107872	-0.170543
68.6	-0.127164	-0.171184
68.7	-0.146678	-0.171505
68.8	-0.166229	-0.171454
68.9	-0.185589	-0.171009
69	-0.204531	-0.170137
69.1	-0.222822	-0.168843
69.2	-0.240247	-0.167119
69.3	-0.256649	-0.164952
69.4	-0.271913	-0.162318
69.5	-0.285993	-0.159143
69.6	-0.298884	-0.155364
69.7	-0.310654	-0.150891
69.8	-0.321455	-0.145638
69.9	-0.331499	-0.1395
70	-0.341043	-0.132337
70.1	-0.350371	-0.124015
70.2	-0.359733	-0.114402
70.3	-0.369357	-0.103423
70.4	-0.379459	-0.091084
70.5	-0.39017	-0.0773942
70.6	-0.401576	-0.0624189
70.7	-0.413677	-0.0462667
70.8	-0.426376	-0.0291294
70.9	-0.43945	-0.0112423
71	-0.452586	0.00710331
71.1	-0.46543	0.025572
71.2	-0.477586	0.0437831
71.3	-0.488594	0.0613305
71.4	-0.498006	0.0778262
71.5	-0.505402	0.0928702
71.6	-0.510367	0.106156
71.7	-0.512534	0.117416
71.8	-0.51161	0.126427
71.9	-0.507391	0.133014
72	-0.499807	0.137084
72.1	-0.488882	0.138652
72.2	-0.474722	0.137823
72.3	-0.457527	0.13474
72.4	-0.437598	0.12959
72.5	-0.415329	0.122609
72.6	-0.391175	0.114123
72.7	-0.365625	0.104492
72.8	-0.33919	0.0940638
72.9	-0.312381	0.0831766
73	-0.285695	0.0721281
73.1	-0.259604	0.0612102
73.2	-0.234551	0.0507005
73.3	-0.210913	0.0408526
73.4	-0.188969	0.0318575
73.5	-0.168941	0.023877
73.6	-0.150954	0.0170408
73.7	-0.135065	0.0114464
73.8	-0.121264	0.00716228
73.9	-0.109486	0.00423731
74	-0.0995816	0.00266736
74.1	-0.0913481	0.0024316
74.2	-0.0845414	0.00349188
74.3	-0.078887	0.00583008
74.4	-0.0740916	0.00943588
74.5	-0.0698607	0.0142775
74.6	-0.0659175	0.0202969
74.7	-0.0620407	0.0274273
74.8	-0.0580552	0.0356067
74.9	-0.0538199	0.0447934
75	-0.0492339	0.0549327
75.1	-0.0442885	0.0659675
75.2	-0.039033	0.0778443
75.3	-0.0336044	0.0905022
75.4	-0.0281894	0.103916
75.5	-0.0230138	0.118045
75.6	-0.0183414	0.132827
75.7	-0.0144647	0.148172
75.8	-0.011682	0.163951
75.9	-0.0103032	0.180034
76	-0.0106157	0.196339
76.1	-0.0128752	0.212781
76.2	-0.0172473	0.229223
76.3	-0.023809	0.245519
76.4	-0.0325653	0.261517
76.5	-0.0434354	0.277104
76.6	-0.056262	0.292174
76.7	-0.0707897	0.306619
76.8	-0.0867112	0.320326
76.9	-0.103701	0.333206
77	-0.121374	0.345203
77.1	-0.139326	0.35627
77.2	-0.157129	0.366375
77.3	-0.174354	0.375491
77.4	-0.190608	0.383572
77.5	-0.205551	0.390554
77.6	-0.218924	0.396373
77.7	-0.230546	0.400962
77.8	-0.240298	0.40424
77.9	-0.248121	0.406111
78	-0.254015	0.406478
78.1	-0.258044	0.405227
78.2	-0.260351	0.402238
78.3	-0.261122	0.397445
78.4	-0.260526	0.390808
78.5	-0.258768	0.382317
78.6	-0.256061	0.371977
78.7	-0.252592	0.359819
78.8	-0.248546	0.345905
78.9	-0.244107	0.330351
79	-0.23941	0.313288
79.1	-0.234531	0.294878
79.2	-0.229511	0.275321
79.3	-0.22437	0.254817
79.4	-0.219118	0.233587
79.5	-0.213737	0.211808
79.6	-0.208227	0.189645
79.7	-0.202584	0.167273
79.8	-0.196815	0.144891
79.9	-0.190941	0.122689
80	-0.185018	0.100859
80.1	-0.179142	0.0795611
80.2	-0.173456	0.0589949
80.3	-0.168138	0.0393776
80.4	-0.163378	0.0209383
80.5	-0.159371	0.00387303
80.6	-0.156333	-0.0116663
80.7	-0.154479	-0.0255387
80.8	-0.153969	-0.0375657
80.9	-0.154904	-0.0475974
81	-0.157333	-0.055536
81.1	-0.161263	-0.0613594
81.2	-0.166597	-0.0651437
81.3	-0.173175	-0.0670036
81.4	-0.180782	-0.067058
81.5	-0.189099	-0.0655333
81.6	-0.19776	-0.0627192
81.7	-0.206363	-0.0589381
81.8	-0.214433	-0.0545428
81.9	-0.221508	-0.0499423
82	-0.227162	-0.0455509
82.1	-0.23101	-0.0417574
82.2	-0.232704	-0.0389576
82.3	-0.231945	-0.0375072
82.4	-0.22852	-0.0377285
82.5	-0.222301	-0.0398907
82.6	-0.213224	-0.0442092
82.7	-0.20129	-0.0507993
82.8	-0.18658	-0.0596972
82.9	-0.169285	-0.0708782
83	-0.149662	-0.084226
83.1	-0.128001	-0.0995708
83.2	-0.104631	-0.116629
83.3	-0.0799232	-0.135042
83.4	-0.054277	-0.15437
83.5	-0.0281168	-0.17412
83.6	-0.00192172	-0.193712
83.7	0.0238127	-0.212548
83.8	0.0486056	-0.229992
83.9	0.0719776	-0.245418
84	0.0934514	-0.258241
84.1	0.112543	-0.267904
84.2	0.128763	-0.273866
84.3	0.141686	-0.275662
84.4	0.150928	-0.272928
84.5	0.156159	-0.265403
84.6	0.157124	-0.252941
84.7	0.153631	-0.235535
84.8	0.145593	-0.213326
84.9	0.133055	-0.186603
85	0.116134	-0.155806
85.1	0.0950396	-0.121483
85.2	0.0700657	-0.0843252
85.3	0.0416047	-0.045137
85.4	0.0101435	-0.00478522
85.5	-0.0237645	0.0357791
85.6	-0.0595124	0.0755748
85.7	-0.0964489	0.113611
85.8	-0.133928	0.148942
85.9	-0.171345	0.180685
86	-0.208146	0.208036
86.1	-0.243794	0.23033
86.2	-0.27779	0.247032
86.3	-0.309714	0.257765
86.4	-0.339237	0.262321
86.5	-0.3661	0.260652
86.6	-0.390116	0.252935
86.7	-0.41121	0.239513
86.8	-0.429379	0.220847
86.9	-0.44466	0.197541
87	-0.457176	0.170284
87.1	-0.467119	0.139847
87.2	-0.474727	0.107047
87.3	-0.480268	0.072747
87.4	-0.484017	0.037769
87.5	-0.486264	0.00290441
87.6	-0.487332	-0.0310971
87.7	-0.487572	-0.0636081
87.8	-0.487311	-0.094103
87.9	-0.486849	-0.122147
88	-0.486459	-0.1474
88.1	-0.486381	-0.169625
88.2	-0.48684	-0.188683
88.3	-0.48801	-0.204541
88.4	-0.490027	-0.217251
88.5	-0.492989	-0.226894
88.6	-0.496957	-0.233622
88.7	-0.501974	-0.237653
88.8	-0.508027	-0.239255
88.9	-0.515032	-0.238705
89	-0.522878	-0.236282
89.1	-0.531405	-0.232239
89.2	-0.540463	-0.226822
89.3	-0.549854	-0.220303
89.4	-0.559325	-0.212956
89.5	-0.568619	-0.204998
89.6	-0.577473	-0.196604
89.7	-0.58564	-0.18792
89.8	-0.592884	-0.179063
89.9	-0.598963	-0.17009
90	-0.603617	-0.161013
90.1	-0.606602	-0.151826
90.2	-0.607734	-0.142506
90.3	-0.606876	-0.133024
90.4	-0.603918	-0.123339
90.5	-0.598784	-0.113386
90.6	-0.591465	-0.103106
90.7	-0.582035	-0.0924915
90.8	-0.570623	-0.0815607
90.9	-0.557424	-0.0703551
91	-0.542701	-0.0589198
91.1	-0.526772	-0.0473376
91.2	-0.510017	-0.0357182
91.3	-0.492886	-0.0242314
91.4	-0.475875	-0.0130744
91.5	-0.459464	-0.00242018
91.6	-0.444117	0.00758366
91.7	-0.430305	0.0167988
91.8	-0.418484	0.0251385
91.9	-0.409048	0.0325542
92	-0.402353	0.0390523
92.1	-0.398649	0.0446645
92.2	-0.398092	0.0494746
92.3	-0.400756	0.0536162
92.4	-0.406605	0.0572468
92.5	-0.415511	0.0605874
92.6	-0.427283	0.0638325
92.7	-0.441633	0.0671759
92.8	-0.458218	0.0707644
92.9	-0.476666	0.0747125
93	-0.496576	0.0791011
93.1	-0.517536	0.0839389
93.2	-0.539138	0.0891963
93.3	-0.561027	0.0947675
93.4	-0.582888	0.100533
93.5	-0.604453	0.106314
93.6	-0.625513	0.111922
93.7	-0.645893	0.117151
93.8	-0.665471	0.121808
93.9	-0.684133	0.12573
94	-0.701802	0.128784
94.1	-0.718438	0.130875
94.2	-0.734008	0.131976
94.3	-0.748457	0.132077
94.4	-0.761715	0.131254
94.5	-0.773707	0.129588
94.6	-0.784341	0.1272
94.7	-0.793476	0.124279
94.8	-0.800951	0.120991
94.9	-0.806597	0.117487
95	-0.810229	0.113902
95.1	-0.811653	0.110363
95.2	-0.810663	0.106973
95.3	-0.80707	0.103825
95.4	-0.800714	0.100998
95.5	-0.791496	0.0985327
95.6	-0.779317	0.096443
95.7	-0.764091	0.0947243
95.8	-0.745772	0.0933813
95.9	-0.724382	0.0923932
96	-0.699972	0.0917112
96.1	-0.672657	0.0913333
96.2	-0.642621	0.0912749
96.3	-0.610107	0.0915808
96.4	-0.575355	0.0922808
96.5	-0.538643	0.0934317
96.6	-0.500246	0.0951214
96.7	-0.460458	0.0974376
96.8	-0.419599	0.100476
96.9	-0.378005	0.104345
97	-0.335985	0.109174
97.1	-0.29384	0.115126
97.2	-0.251855	0.122348
97.3	-0.210318	0.130996
97.4	-0.169535	0.141199
97.5	-0.129785	0.153058
97.6	-0.0913094	0.166605
97.7	-0.0543872	0.181848
97.8	-0.0193398	0.198753
97.9	0.0134859	0.217205
98	0.0437401	0.236993
98.1	0.0710537	0.257842
98.2	0.0950455	0.27942
98.3	0.115313	0.301306
98.4	0.131467	0.323015
98.5	0.143159	0.344015
98.6	0.150084	0.363748
98.7	0.152014	0.381644
98.8	0.148821	0.39715
98.9	0.1405	0.409776
99	0.127165	0.419084
99.1	0.109032	0.424721
99.2	0.0864662	0.426481
99.3	0.0599854	0.424312
99.4	0.0302047	0.418327
99.5	-0.00217811	0.408742
99.6	-0.0363762	0.395903
99.7	-0.0715471	0.380271
99.8	-0.106843	0.362416
99.9	-0.141427	0.342975
100	-0.174488	0.322638
100.1	-0.205283	0.302108
100.2	-0.233175	0.28207
100.3	-0.257643	0.263127
100.4	-0.278258	0.245782
100.5	-0.294697	0.230384
100.6	-0.306755	0.217158
100.7	-0.314386	0.206213
100.8	-0.317646	0.197504
100.9	-0.316697	0.19079
101	-0.311788	0.185707
101.1	-0.303244	0.181786
101.2	-0.29146	0.178502
101.3	-0.276892	0.175255
101.4	-0.26006	0.171437
101.5	-0.241504	0.166436
101.6	-0.221784	0.159678
101.7	-0.201477	0.150686
101.8	-0.18113	0.139098
101.9	-0.161292	0.124649
102	-0.142473	0.107237
102.1	-0.125152	0.0868845
102.2	-0.109752	0.0637863
102.3	-0.0966228	0.0382601
102.4	-0.0860317	0.0107208
102.5	-0.0781533	-0.0183007
102.6	-0.0730495	-0.0482119
102.7	-0.0706785	-0.0784035
102.8	-0.0709059	-0.108216
102.9	-0.0735018	-0.136984
103	-0.0781478	-0.16409
103.1	-0.0844393	-0.189
103.2	-0.0919226	-0.211279
103.3	-0.100101	-0.230548
103.4	-0.108479	-0.24655
103.5	-0.116575	-0.25917
103.6	-0.123974	-0.268386
103.7	-0.130299	-0.274246
103.8	-0.135238	-0.276939
103.9	-0.138558	-0.276739
104	-0.140141	-0.273968
104.1	-0.139934	-0.269043
104.2	-0.13794	-0.262431
104.3	-0.134237	-0.254604
104.4	-0.128985	-0.246037
104.5	-0.122385	-0.237171
104.6	-0.114634	-0.228432
104.7	-0.105887	-0.220191
104.8	-0.0963044	-0.212768
104.9	-0.0860578	-0.20638
105	-0.0752916	-0.201185
105.1	-0.0640796	-0.197282
105.2	-0.0524627	-0.194682
105.3	-0.0404703	-0.193308
105.4	-0.0281185	-0.193019
105.5	-0.0154081	-0.193605
105.6	-0.00236278	-0.194825
105.7	0.0110124	-0.196425
105.8	0.0246797	-0.198137
105.9	0.0385529	-0.199703
106	0.0524911	-0.200858
106.1	0.066316	-0.201354
106.2	0.0798176	-0.201015
106.3	0.0927764	-0.19971
106.4	0.104938	-0.197359
106.5	0.115991	-0.193975
106.6	0.125609	-0.189612
106.7	0.133452	-0.184346
106.8	0.139181	-0.178322
106.9	0.142457	-0.17176
107	0.142989	-0.164895
107.1	0.140542	-0.157965
107.2	0.134909	-0.151258
107.3	0.125934	-0.145031
107.4	0.11354	-0.139513
107.5	0.0977334	-0.134927
107.6	0.078598	-0.131455
107.7	0.0563243	-0.129186
107.8	0.0311929	-0.128214
107.9	0.00358299	-0.128609
108	-0.0260287	-0.130424
108.1	-0.0570902	-0.133674
108.2	-0.0889938	-0.138341
108.3	-0.121096	-0.144347
108.4	-0.152725	-0.151594
108.5	-0.18324	-0.159942
108.6	-0.212036	-0.169251
108.7	-0.238556	-0.17936
108.8	-0.262295	-0.190095
108.9	-0.282859	-0.201278
109	-0.299977	-0.212696
109.1	-0.313498	-0.224147
109.2	-0.323364	-0.235425
109.3	-0.329636	-0.246315
109.4	-0.332509	-0.256612
109.5	-0.332275	-0.266107
109.6	-0.329281	-0.274592
109.7	-0.323955	-0.281894
109.8	-0.316774	-0.287861
109.9	-0.308229	-0.292379
110	-0.298833	-0.29537
110.1	-0.289063	-0.296771
110.2	-0.27936	-0.29656
110.3	-0.270104	-0.294749
110.4	-0.261596	-0.291406
110.5	-0.254056	-0.286635
110.6	-0.247653	-0.280534
110.7	-0.242489	-0.273193
110.8	-0.238567	-0.264717
110.9	-0.235777	-0.255264
111	-0.233949	-0.244988
111.1	-0.232885	-0.234017
111.2	-0.232329	-0.222458
111.3	-0.231996	-0.210427
111.4	-0.231577	-0.198012
111.5	-0.23075	-0.185284
111.6	-0.229211	-0.172352
111.7	-0.226679	-0.15932
111.8	-0.222902	-0.14628
111.9	-0.217668	-0.133288
112	-0.210811	-0.120407
112.1	-0.202226	-0.107687
112.2	-0.191883	-0.0951674
112.3	-0.179803	-0.0828659
112.4	-0.166032	-0.0707628
112.5	-0.150662	-0.0588209
112.6	-0.133866	-0.0469744
112.7	-0.11588	-0.0351135
112.8	-0.0969583	-0.0230887
112.9	-0.0773663	-0.0107653
113	-0.0574118	0.00202731
113.1	-0.0374397	0.0154941
113.2	-0.017798	0.0298345
113.3	0.00116314	0.0452583
113.4	0.0190936	0.0619457
113.5	0.0356436	0.0800245
113.6	0.0505116	0.0995605
113.7	0.0634288	0.120531
113.8	0.0741442	0.142837
113.9	0.082456	0.166301
114	0.0882344	0.190635
114.1	0.0914238	0.215475
114.2	0.0920552	0.240424
114.3	0.0902024	0.265037
114.4	0.086005	0.288809
114.5	0.0796859	0.31121
114.6	0.0715282	0.331714
114.7	0.0618626	0.349842
114.8	0.0510656	0.365195
114.9	0.0395379	0.377458
115	0.0276691	0.386403
115.1	0.0158183	0.391882
115.2	0.00433289	0.393912
115.3	-0.00646146	0.392603
115.4	-0.0162902	0.388214
115.5	-0.0249547	0.381097
115.6	-0.0323166	0.371672
115.7	-0.0383058	0.36039
115.8	-0.0429416	0.347791
115.9	-0.0463238	0.334469
116	-0.048603	0.320997
116.1	-0.0499543	0.307898
116.2	-0.0505471	0.295671
116.3	-0.0506037	0.284739
116.4	-0.0503744	0.275416
116.5	-0.0500871	0.267917
116.6	-0.0499024	0.262378
116.7	-0.049947	0.258832
116.8	-0.0503104	0.257253
116.9	-0.0510156	0.257549
117	-0.0520219	0.259501
117.1	-0.0532613	0.262877
117.2	-0.0546335	0.2674
117.3	-0.0559646	0.272763
117.4	-0.0569914	0.278673
117.5	-0.0574398	0.284824
117.6	-0.057037	0.290952
117.7	-0.0554815	0.296867
117.8	-0.0524913	0.302405
117.9	-0.0478057	0.307441
118	-0.0411751	0.311879
118.1	-0.0324157	0.315633
118.2	-0.0214139	0.318686
118.3	-0.00810505	0.321063
118.4	0.00751699	0.322818
118.5	0.0253636	0.324037
118.6	0.0452644	0.324805
118.7	0.0669697	0.325175
118.8	0.0901665	0.325218
118.9	0.114422	0.325024
119	0.139241	0.324684
119.1	0.164123	0.32427
119.2	0.188521	0.323766
119.3	0.211863	0.323189
119.4	0.233617	0.322555
119.5	0.253275	0.321878
119.6	0.270378	0.321156
119.7	0.284533	0.320388
119.8	0.295489	0.319558
119.9	0.303116	0.318607
120	0.307388	0.317494
120.1	0.308408	0.31619
120.2	0.306423	0.314685
120.3	0.301776	0.312949
120.4	0.294929	0.310952
120.5	0.286449	0.308672
120.6	0.276964	0.306114
120.7	0.267142	0.303275
120.8	0.257658	0.300151
120.9	0.249172	0.296771
121	0.242267	0.293206
121.1	0.237448	0.289535
121.2	0.235119	0.285811
121.3	0.235587	0.282059
121.4	0.239036	0.278327
121.5	0.245499	0.274682
121.6	0.254874	0.271172
121.7	0.266954	0.267824
121.8	0.281469	0.264614
121.9	0.298059	0.261499
122	0.316296	0.258429
122.1	0.335714	0.255318
122.2	0.355833	0.252019
122.3	0.376206	0.248366
122.4	0.396437	0.24419
122.5	0.416185	0.239297
122.6	0.435153	0.233458
122.7	0.453122	0.226411
122.8	0.46993	0.217901
122.9	0.485475	0.207721
123	0.499696	0.195701
123.1	0.51261	0.181709
123.2	0.524243	0.16563
123.3	0.534598	0.147417
123.4	0.543665	0.127114
123.5	0.551447	0.104864
123.6	0.557922	0.0809124
123.7	0.563024	0.0555838
123.8	0.566662	0.0292471
123.9	0.568709	0.00231818
124	0.568994	-0.0247023
124.1	0.567336	-0.0513165
124.2	0.563539	-0.0770208
124.3	0.557428	-0.101315
124.4	0.54885	-0.123718
124.5	0.53768	-0.143794
124.6	0.523811	-0.161217
124.7	0.507182	-0.175722
124.8	0.487765	-0.187186
124.9	0.465592	-0.195532
125	0.440793	-0.200775
125.1	0.413609	-0.203011
125.2	0.38431	-0.202414
125.3	0.35319	-0.19918
125.4	0.32061	-0.193545
125.5	0.287005	-0.185768
125.6	0.252831	-0.176144
125.7	0.218571	-0.164957
125.8	0.184706	-0.152447
125.9	0.151728	-0.138818
126	0.120104	-0.124238
126.1	0.0902694	-0.108866
126.2	0.0626001	-0.0928223
126.3	0.0374127	-0.076255
126.4	0.0149536	-0.0592959
126.5	-0.00459803	-0.0421145
126.6	-0.0211295	-0.0248835
126.7	-0.0346085	-0.00778791
126.8	-0.0450854	0.00895003
126.9	-0.052653	0.0250795
127	-0.0574351	0.0402973
127.1	-0.0596101	0.0542915
127.2	-0.0594019	0.0667456
127.3	-0.0570785	0.0773161
127.4	-0.0529435	0.0856588
127.5	-0.0472957	0.0914677
127.6	-0.0404365	0.094507
127.7	-0.0326843	0.0945928
127.8	-0.0243679	0.0916298
127.9	-0.0158007	0.0855911
128	-0.00728603	0.076576
128.1	0.000887612	0.0647591
128.2	0.00844054	0.0504387
128.3	0.0151222	0.0340221
128.4	0.0206975	0.0159872
128.5	0.0249533	-0.00314542
128.6	0.0277173	-0.0228741
128.7	0.0288589	-0.0426724
128.8	0.0283046	-0.0619967
128.9	0.0260155	-0.080352
129	0.0220065	-0.0973541
129.1	0.0163265	-0.112695
129.2	0.00905879	-0.126137
129.3	0.000288687	-0.137525
129.4	-0.00986016	-0.146839
129.5	-0.0212345	-0.15417
129.6	-0.0336845	-0.159669
129.7	-0.0470828	-0.16352
129.8	-0.0613168	-0.165954
129.9	-0.0762936	-0.167258
130	-0.0919265	-0.167702
130.1	-0.10813	-0.167557
130.2	-0.124821	-0.166999
130.3	-0.141915	-0.166161
130.4	-0.159323	-0.165137
130.5	-0.176944	-0.16398
130.6	-0.194642	-0.162651
130.7	-0.212248	-0.161061
130.8	-0.22959	-0.1591
130.9	-0.246458	-0.156669
131	-0.262588	-0.153655
131.1	-0.277735	-0.149954
131.2	-0.291654	-0.145447
131.3	-0.304083	-0.140057
131.4	-0.314784	-0.133753
131.5	-0.323554	-0.126532
131.6	-0.330222	-0.118438
131.7	-0.334666	-0.109548
131.8	-0.336828	-0.0999605
131.9	-0.336721	-0.089781
132	-0.334451	-0.0790856
132.1	-0.330199	-0.0679791
132.2	-0.324192	-0.0565474
132.3	-0.316686	-0.0448591
132.4	-0.307967	-0.0329668
132.5	-0.298373	-0.0209219
132.6	-0.288229	-0.00875875
132.7	-0.277826	0.00353316
132.8	-0.267419	0.01595
132.9	-0.257213	0.0285108
133	-0.247412	0.0412214
133.1	-0.238159	0.0540436
133.2	-0.229493	0.0669287
133.3	-0.221374	0.0797775
133.4	-0.213736	0.0925262
133.5	-0.206475	0.105091
133.6	-0.199467	0.117386
133.7	-0.192583	0.129281
133.8	-0.185676	0.140651
133.9	-0.178612	0.151404
134	-0.171274	0.161436
134.1	-0.163579	0.170687
134.2	-0.155472	0.179121
134.3	-0.146943	0.186744
134.4	-0.137999	0.193588
134.5	-0.128651	0.199749
134.6	-0.118924	0.205296
134.7	-0.108867	0.210326
134.8	-0.0985336	0.214953
134.9	-0.087971	0.219292
135	-0.0772163	0.22342
135.1	-0.0662848	0.227448
135.2	-0.0551477	0.231425
135.3	-0.0437541	0.235369
135.4	-0.0320814	0.239269
135.5	-0.0201208	0.243063
135.6	-0.00788825	0.246667
135.7	0.00458155	0.249957
135.8	0.0172149	0.252763
135.9	0.029917	0.25489
136	0.0425775	0.256141
136.1	0.055044	0.2563
136.2	0.0671196	0.255165
136.3	0.0786118	0.252567
136.4	0.0893243	0.248375
136.5	0.0991064	0.242537
136.6	0.107842	0.235086
136.7	0.11546	0.226109
136.8	0.12194	0.215745
136.9	0.127328	0.204218
137	0.131719	0.191812
137.1	0.135272	0.17888
137.2	0.138199	0.165826
137.3	0.140756	0.153075
137.4	0.143217	0.141063
137.5	0.145877	0.130221
137.6	0.149009	0.120905
137.7	0.152858	0.113398
137.8	0.157597	0.107929
137.9	0.163352	0.104659
138	0.17017	0.103624
138.1	0.178011	0.104731
138.2	0.186745	0.107768
138.3	0.196192	0.112452
138.4	0.206117	0.118432
138.5	0.216237	0.125265
138.6	0.226194	0.132458
138.7	0.235628	0.13952
138.8	0.244199	0.146021
138.9	0.251587	0.151564
139	0.25749	0.155801
139.1	0.261678	0.158425
139.2	0.26402	0.159253
139.3	0.26446	0.1582
139.4	0.262978	0.155304
139.5	0.259621	0.150729
139.6	0.254517	0.144689
139.7	0.247851	0.137534
139.8	0.23986	0.129664
139.9	0.230816	0.12156
140	0.221026	0.113681
140.1	0.210819	0.106517
140.2	0.200531	0.100519
140.3	0.190471	0.096114
140.4	0.18091	0.0936706
140.5	0.172106	0.0935142
140.6	0.164294	0.0958574
140.7	0.15767	0.100789
140.8	0.152409	0.1083
140.9	0.148631	0.118267
141	0.146393	0.130451
141.1	0.145696	0.144504
141.2	0.146522	0.160002
141.3	0.148823	0.176431
141.4	0.152525	0.193197
141.5	0.157507	0.209626
141.6	0.163629	0.225028
141.7	0.17071	0.23871
141.8	0.178574	0.249954
141.9	0.187032	0.258083
142	0.195936	0.262477
142.1	0.205156	0.262599
142.2	0.214577	0.258002
142.3	0.224103	0.248354
142.4	0.233681	0.233447
142.5	0.243273	0.21325
142.6	0.252918	0.187904
142.7	0.262703	0.157706
142.8	0.272711	0.123119
142.9	0.283049	0.0847395
143	0.293807	0.0433233
143.1	0.30507	-0.000271999
143.2	0.316874	-0.0450785
143.3	0.329197	-0.0900862
143.4	0.341971	-0.134275
143.5	0.35506	-0.176641
143.6	0.368277	-0.216222
143.7	0.381358	-0.252153
143.8	0.393979	-0.283675
143.9	0.40574	-0.310198
144	0.416182	-0.331316
144.1	0.424845	-0.3468
144.2	0.43128	-0.356623
144.3	0.435069	-0.36092
144.4	0.43586	-0.359959
144.5	0.433377	-0.354185
144.6	0.427437	-0.344161
144.7	0.417954	-0.330507
144.8	0.404935	-0.31391
144.9	0.388522	-0.295043
145	0.369007	-0.274555
145.1	0.346766	-0.253073
145.2	0.322236	-0.231173
145.3	0.2959	-0.209312
145.4	0.268303	-0.187888
145.5	0.240013	-0.167222
145.6	0.211596	-0.14751
145.7	0.183576	-0.12889
145.8	0.156454	-0.111469
145.9	0.130653	-0.0953066
146	0.106527	-0.0804188
146.1	0.0843625	-0.0668041
146.2	0.0643593	-0.0544474
146.3	0.0466542	-0.0433695
146.4	0.031282	-0.0336086
146.5	0.018215	-0.0251772
146.6	0.0074056	-0.0181067
146.7	-0.00127317	-0.0124304
146.8	-0.008003	-0.00820848
146.9	-0.0130088	-0.00547143
147	-0.0165336	-0.00419637
147.1	-0.0188383	-0.00435277
147.2	-0.0201941	-0.00588246
147.3	-0.0208671	-0.00869867
147.4	-0.0210873	-0.0126211
147.5	-0.0210795	-0.0174238
147.6	-0.0210608	-0.0228321
147.7	-0.0212062	-0.0285561
147.8	-0.0216412	-0.0342867
147.9	-0.0224401	-0.0396597
148	-0.0236326	-0.0442974
148.1	-0.0252015	-0.047826
148.2	-0.0270599	-0.049886
148.3	-0.0290825	-0.0501883
148.4	-0.0311187	-0.0484926
148.5	-0.0329716	-0.0446236
148.6	-0.0344052	-0.0384485
148.7	-0.0351598	-0.0299523
148.8	-0.0350042	-0.0192139
148.9	-0.0337245	-0.00643464
149	-0.0311196	0.00811557
149.1	-0.0270303	0.0240686
149.2	-0.021338	0.0409258
149.3	-0.0139733	0.0581291
149.4	-0.00494019	0.0750749
149.5	0.00568486	0.091151
149.6	0.0177858	0.105745
149.7	0.0311958	0.118274
149.8	0.0456775	0.128211
149.9	0.060964	0.135097
150	0.0767331	0.13856
150.1	0.0926367	0.138325
150.2	0.108326	0.134255
150.3	0.123465	0.12634
150.4	0.137719	0.114712
150.5	0.150762	0.099612
150.6	0.162252	0.081414
150.7	0.171908	0.0605562
150.8	0.179509	0.0375765
150.9	0.184844	0.0130413
151	0.187727	-0.0124361
151.1	0.188004	-0.0382216
151.2	0.18558	-0.0637314
151.3	0.18042	-0.0884001
151.4	0.172536	-0.111695
151.5	0.161987	-0.133167
151.6	0.148838	-0.152387
151.7	0.13321	-0.169015
151.8	0.115292	-0.182801
151.9	0.0953272	-0.193572
152	0.0736047	-0.201236
152.1	0.0504474	-0.205756
152.2	0.0262262	-0.207157
152.3	0.00131923	-0.205542
152.4	-0.0238646	-0.201093
152.5	-0.0488945	-0.193992
152.6	-0.0733209	-0.184497
152.7	-0.0966883	-0.172927
152.8	-0.118551	-0.159615
152.9	-0.138457	-0.144911
153	-0.15601	-0.129114
153.1	-0.170874	-0.112516
153.2	-0.182758	-0.0954334
153.3	-0.191451	-0.0781853
153.4	-0.196805	-0.0610401
153.5	-0.198739	-0.0442402
153.6	-0.197262	-0.0279648
153.7	-0.192466	-0.012356
153.8	-0.184539	0.00246314
153.9	-0.173742	0.0164001
154	-0.160409	0.0293968
154.1	-0.14492	0.041435
154.2	-0.127677	0.0525244
154.3	-0.109137	0.0626629
154.4	-0.0897369	0.0718191
154.5	-0.0699083	0.0799683
154.6	-0.0500656	0.0870769
154.7	-0.0305946	0.0931051
154.8	-0.0118364	0.0980242
154.9	0.00594092	0.101791
155	0.0225441	0.104349
155.1	0.0378414	0.105621
155.2	0.0517175	0.105556
155.3	0.0641273	0.104133
155.4	0.0751052	0.101368
155.5	0.084708	0.0972956
155.6	0.0929948	0.0920236
155.7	0.100012	0.0856979
155.8	0.105831	0.0784719
155.9	0.110521	0.0705431
156	0.114126	0.0621422
156.1	0.116673	0.0535391
156.2	0.118154	0.0450304
156.3	0.118581	0.0369127
156.4	0.117956	0.0294464
156.5	0.116257	0.0228422
156.6	0.113491	0.0172766
156.7	0.109677	0.0128801
156.8	0.104874	0.00972918
156.9	0.0991894	0.00781325
157	0.0927835	0.00702647
157.1	0.0858655	0.00719622
157.2	0.0786815	0.00811175
157.3	0.0715278	0.00949935
157.4	0.0647585	0.0110529
157.5	0.058777	0.01241
157.6	0.0539725	0.0132368
157.7	0.0507384	0.013211
157.8	0.049471	0.0120428
157.9	0.0505482	0.00953749
158	0.054315	0.00555686
158.1	0.0610699	3.69915e-05
158.2	0.0710086	-0.00699826
158.3	0.0842322	-0.0154364
158.4	0.100743	-0.0250628
158.5	0.120444	-0.0356018
158.6	0.143134	-0.0466749
158.7	0.168525	-0.0578081
158.8	0.196243	-0.0684759
158.9	0.225827	-0.0781319
159	0.256763	-0.08622
159.1	0.288478	-0.0922253
159.2	0.320314	-0.0956461
159.3	0.351586	-0.0960295
159.4	0.381593	-0.0929834
159.5	0.409667	-0.0861799
159.6	0.435198	-0.0753891
159.7	0.457626	-0.0605061
159.8	0.476446	-0.0415623
159.9	0.491277	-0.0186674
160	0.501848	0.00794963
160.1	0.508001	0.0379293
160.2	0.509685	0.0707958
160.3	0.506968	0.105934
160.4	0.500041	0.142685
160.5	0.489208	0.180343
160.6	0.474871	0.218172
160.7	0.457504	0.255408
160.8	0.437635	0.291268
160.9	0.415819	0.325003
161	0.392648	0.355936
161.1	0.368725	0.383478
161.2	0.344607	0.407158
161.3	0.320794	0.426657
161.4	0.297728	0.441791
161.5	0.275766	0.452528
161.6	0.255206	0.45893
161.7	0.236263	0.461224
161.8	0.219059	0.459794
161.9	0.203633	0.455095
162	0.189977	0.447657
162.1	0.178033	0.43801
162.2	0.167668	0.426693
162.3	0.158714	0.414255
162.4	0.150985	0.401195
162.5	0.144271	0.387934
162.6	0.13836	0.374788
162.7	0.133073	0.36198
162.8	0.128248	0.349628
162.9	0.123755	0.337756
163	0.119492	0.326285
163.1	0.115355	0.315077
163.2	0.111293	0.303936
163.3	0.107298	0.292603
163.4	0.103389	0.280809
163.5	0.0996172	0.268316
163.6	0.096049	0.254921
163.7	0.0927639	0.240498
163.8	0.0898119	0.224968
163.9	0.0872577	0.208309
164	0.0851923	0.190555
164.1	0.083655	0.171821
164.2	0.0826644	0.152226
164.3	0.082215	0.13194
164.4	0.0822903	0.111196
164.5	0.0828185	0.0902317
164.6	0.0836696	0.0692327
164.7	0.0846984	0.0484455
164.8	0.0857235	0.0280874
164.9	0.0865504	0.00838164
165	0.0869858	-0.0104839
165.1	0.086823	-0.0283539
165.2	0.0858521	-0.0450718
165.3	0.0839061	-0.0605356
165.4	0.0808578	-0.0746557
165.5	0.0766231	-0.0873005
165.6	0.0711769	-0.098366
165.7	0.0645363	-0.107781
165.8	0.0567536	-0.115496
165.9	0.0479755	-0.121495
166	0.0384319	-0.125801
166.1	0.028395	-0.128481
166.2	0.0182041	-0.129634
166.3	0.00819405	-0.129408
166.4	-0.00130464	-0.128009
166.5	-0.00994561	-0.1257
166.6	-0.0173975	-0.122808
166.7	-0.023375	-0.119738
166.8	-0.0276368	-0.116862
166.9	-0.0299978	-0.114551
167	-0.0303585	-0.113179
167.1	-0.0287126	-0.113079
167.2	-0.0251173	-0.114528
167.3	-0.0197076	-0.117752
167.4	-0.0126897	-0.122911
167.5	-0.0043492	-0.13006
167.6	0.00497678	-0.139145
167.7	0.0149088	-0.149996
167.8	0.0250619	-0.162298
167.9	0.0350271	-0.175651
168	0.04441	-0.189593
168.1	0.0528601	-0.20357
168.2	0.0600926	-0.216984
168.3	0.0658643	-0.229244
168.4	0.0699742	-0.239783
168.5	0.0722843	-0.248052
168.6	0.0727647	-0.253556
168.7	0.0714736	-0.255877
168.8	0.0685091	-0.254696
168.9	0.0640228	-0.249859
169	0.0582409	-0.241322
169.1	0.0514077	-0.229185
169.2	0.0438007	-0.213666
169.3	0.0357195	-0.195109
169.4	0.0274431	-0.173992
169.5	0.0192291	-0.150862
169.6	0.0113122	-0.126317
169.7	0.00388356	-0.100997
169.8	-0.00289203	-0.075576
169.9	-0.00888083	-0.0506479
170	-0.0140259	-0.0267727
170.1	-0.0183286	-0.00444051
170.2	-0.0217958	0.01593
170.3	-0.0244785	0.0340202
170.4	-0.0264444	0.0495966
170.5	-0.027777	0.0625389
170.6	-0.0285894	0.0728386
170.7	-0.0290338	0.0805691
170.8	-0.0292631	0.0858868
170.9	-0.0294292	0.0890053
171	-0.0296906	0.090205
171.1	-0.0301703	0.0897529
171.2	-0.0310172	0.087919
171.3	-0.0324029	0.0849836
171.4	-0.0344644	0.081229
171.5	-0.0373156	0.0769117
171.6	-0.041059	0.0722559
171.7	-0.0457848	0.0674475
171.8	-0.0515732	0.0626648
171.9	-0.0584523	0.0581053
172	-0.0664384	0.0539148
172.1	-0.0754847	0.0502441
172.2	-0.0854977	0.0472591
172.3	-0.0963411	0.0451048
172.4	-0.107842	0.0439241
172.5	-0.119774	0.0438316
172.6	-0.131864	0.0449369
172.7	-0.143799	0.0473488
172.8	-0.155255	0.051152
172.9	-0.165904	0.0564211
173	-0.175418	0.0632131
173.1	-0.183465	0.0715349
173.2	-0.189774	0.0813463
173.3	-0.194124	0.0925815
173.4	-0.196333	0.105157
173.5	-0.196265	0.118924
173.6	-0.193843	0.133701
173.7	-0.189061	0.149305
173.8	-0.182004	0.165528
173.9	-0.172845	0.182159
174	-0.161806	0.198973
174.1	-0.149134	0.215769
174.2	-0.135139	0.232313
174.3	-0.12014	0.248379
174.4	-0.104479	0.263739
174.5	-0.0885218	0.278168
174.6	-0.0726413	0.29144
174.7	-0.0571726	0.303345
174.8	-0.0424109	0.313679
174.9	-0.0285909	0.322242
175	-0.0159244	0.328859
175.1	-0.00456617	0.333387
175.2	0.00537378	0.335649
175.3	0.0138135	0.33554
175.4	0.0207264	0.332976
175.5	0.0261043	0.327933
175.6	0.029989	0.32044
175.7	0.0324664	0.310577
175.8	0.0336116	0.298457
175.9	0.0335276	0.284245
176	0.0323354	0.268183
176.1	0.0301697	0.250568
176.2	0.0271438	0.231731
176.3	0.0233753	0.212058
176.4	0.0189731	0.191913
176.5	0.0140535	0.171619
176.6	0.0087481	0.151521
176.7	0.00316746	0.131943
176.8	-0.00258385	0.11321
176.9	-0.0083944	0.0956371
177	-0.0141202	0.0795296
177.1	-0.0196035	0.0651081
177.2	-0.0246909	0.0525501
177.3	-0.029255	0.0419786
177.4	-0.0331649	0.0335195
177.5	-0.036309	0.0272806
177.6	-0.0385954	0.0233639
177.7	-0.0399227	0.0218351
177.8	-0.0402018	0.022723
177.9	-0.0393778	0.0260609
178	-0.0373889	0.0318697
178.1	-0.0341858	0.0401724
178.2	-0.0297144	0.0509584
178.3	-0.0239008	0.064183
178.4	-0.0166736	0.0797766
178.5	-0.00794554	0.0976293
178.6	0.00241943	0.117589
178.7	0.0145835	0.139437
178.8	0.0287195	0.162911
178.9	0.0450234	0.187689
179	0.0637031	0.213383
179.1	0.084952	0.239562
179.2	0.10894	0.26576
179.3	0.13581	0.29148
179.4	0.165607	0.3162
179.5	0.198305	0.339373
179.6	0.23379	0.360469
179.7	0.271869	0.378963
179.8	0.312213	0.394384
179.9	0.354368	0.406306
180	0.397789	0.41438
180.1	0.44182	0.418349
180.2	0.485741	0.418087
180.3	0.528784	0.413544
180.4	0.570173	0.404786
180.5	0.609137	0.391986
180.6	0.644915	0.375397
180.7	0.676772	0.355364
180.8	0.704086	0.332319
180.9	0.726351	0.306748
181	0.743173	0.279192
181.1	0.754289	0.250271
181.2	0.759611	0.220554
181.3	0.759189	0.190604
181.4	0.75322	0.160916
181.5	0.742062	0.13195
181.6	0.726195	0.104108
181.7	0.706238	0.0777452
181.8	0.682929	0.0531204
181.9	0.657069	0.030402
182	0.629489	0.00966338
182.1	0.601033	-0.00906202
182.2	0.572552	-0.0258238
182.3	0.544851	-0.0407059
182.4	0.518654	-0.053796
182.5	0.494595	-0.0652268
182.6	0.473213	-0.0751335
182.7	0.454883	-0.0836556
182.8	0.439832	-0.0909416
182.9	0.42814	-0.0971367
183	0.419768	-0.10234
183.1	0.414539	-0.106631
183.2	0.412167	-0.110028
183.3	0.412285	-0.112564
183.4	0.41446	-0.114254
183.5	0.418235	-0.115093
183.6	0.423135	-0.115096
183.7	0.428704	-0.1143
183.8	0.434544	-0.112705
183.9	0.440304	-0.110317
184	0.445679	-0.107225
184.1	0.450443	-0.103538
184.2	0.454458	-0.0993654
184.3	0.457654	-0.0948536
184.4	0.460006	-0.090172
184.5	0.461505	-0.0855105
184.6	0.462148	-0.0810654
184.7	0.46198	-0.0770514
184.8	0.461062	-0.0736706
184.9	0.459423	-0.0711653
185	0.457062	-0.0697586
185.1	0.453985	-0.0696156
185.2	0.450205	-0.0708401
185.3	0.445719	-0.073518
185.4	0.440491	-0.0776865
185.5	0.434491	-0.0833456
185.6	0.427694	-0.0904495
185.7	0.420065	-0.0988619
185.8	0.411575	-0.108385
185.9	0.40223	-0.118797
186	0.392063	-0.129835
186.1	0.381147	-0.141181
186.2	0.369553	-0.152523
186.3	0.357326	-0.163532
186.4	0.344538	-0.173899
186.5	0.331294	-0.183352
186.6	0.317703	-0.191621
186.7	0.303867	-0.198469
186.8	0.289889	-0.203725
186.9	0.275875	-0.207272
187	0.261924	-0.209071
187.1	0.248125	-0.209142
187.2	0.234596	-0.20757
187.3	0.221461	-0.204494
187.4	0.208845	-0.200091
187.5	0.196856	-0.194555
187.6	0.185631	-0.188108
187.7	0.175302	-0.180996
187.8	0.166028	-0.173467
187.9	0.157936	-0.16574
188	0.151135	-0.158047
188.1	0.145745	-0.150608
188.2	0.141855	-0.14362
188.3	0.139518	-0.13722
188.4	0.138729	-0.131503
188.5	0.139447	-0.126525
188.6	0.141588	-0.122334
188.7	0.145032	-0.118982
188.8	0.149599	-0.116524
188.9	0.155029	-0.114982
189	0.161034	-0.11438
189.1	0.16729	-0.114706
189.2	0.173452	-0.115941
189.3	0.179174	-0.118022
189.4	0.184118	-0.120854
189.5	0.187961	-0.124371
189.6	0.190454	-0.128513
189.7	0.191411	-0.133185
189.8	0.190682	-0.138258
189.9	0.188197	-0.143555
190	0.183991	-0.148873
190.1	0.178183	-0.154028
190.2	0.170955	-0.158824
190.3	0.162535	-0.163076
190.4	0.153188	-0.166626
190.5	0.143201	-0.169313
190.6	0.13284	-0.170978
190.7	0.122375	-0.171507
190.8	0.112063	-0.170801
190.9	0.102111	-0.168815
191	0.0926428	-0.16557
191.1	0.0837189	-0.161101
191.2	0.0753622	-0.155445
191.3	0.0675606	-0.148714
191.4	0.0602724	-0.141052
191.5	0.0534405	-0.132593
191.6	0.0469881	-0.123459
191.7	0.0408451	-0.113773
191.8	0.0349809	-0.103634
191.9	0.0294084	-0.0931475
192	0.0242066	-0.0823748
192.1	0.0195149	-0.0713656
192.2	0.0155184	-0.0601465
192.3	0.0124345	-0.0486986
192.4	0.0104924	-0.0369818
192.5	0.00993956	-0.024954
192.6	0.0110239	-0.0125639
192.7	0.0139656	0.00023917
192.8	0.0189357	0.0135029
192.9	0.0260324	0.0272539
193	0.035283	0.0414818
193.1	0.0466128	0.0561197
193.2	0.0598325	0.0710829
193.3	0.0746878	0.0862596
193.4	0.0908673	0.101462
193.5	0.107973	0.116466
193.6	0.125539	0.13104
193.7	0.143066	0.144927
193.8	0.160064	0.157843
193.9	0.176058	0.169525
194	0.190586	0.179766
194.1	0.203247	0.188415
194.2	0.213713	0.195378
194.3	0.221771	0.200656
194.4	0.227303	0.204327
194.5	0.230289	0.206534
194.6	0.230796	0.207467
194.7	0.229005	0.20738
194.8	0.225216	0.20659
194.9	0.219803	0.205484
195	0.213191	0.204459
195.1	0.205845	0.203857
195.2	0.198266	0.203999
195.3	0.190951	0.205174
195.4	0.184366	0.207586
195.5	0.178972	0.211406
195.6	0.175188	0.216704
195.7	0.173348	0.223476
195.8	0.173683	0.231637
195.9	0.176365	0.241031
196	0.181505	0.251481
196.1	0.189107	0.262748
196.2	0.199043	0.274611
196.3	0.211097	0.286832
196.4	0.225024	0.299182
196.5	0.240527	0.311463
196.6	0.257262	0.323537
196.7	0.274831	0.335324
196.8	0.29286	0.346803
196.9	0.310995	0.357929
197	0.328873	0.368707
197.1	0.346166	0.379171
197.2	0.362573	0.389341
197.3	0.377824	0.399217
197.4	0.391702	0.408788
197.5	0.404082	0.418046
197.6	0.414887	0.42692
197.7	0.424055	0.435232
197.8	0.431557	0.442729
197.9	0.43742	0.449079
198	0.4417	0.453902
198.1	0.44448	0.456785
198.2	0.445849	0.45725
198.3	0.445928	0.454864
198.4	0.444853	0.449181
198.5	0.442771	0.439832
198.6	0.439868	0.426489
198.7	0.436329	0.408974
198.8	0.432306	0.387228
198.9	0.427955	0.36137
199	0.423486	0.331634
199.1	0.419105	0.298402
199.2	0.414991	0.262223
199.3	0.411324	0.223795
199.4	0.408275	0.183944
199.5	0.406012	0.143547
199.6	0.404687	0.103539
199.7	0.404407	0.0648439
[truncated: 5,003 more rows]

## Sheet: 16922009-10.abf
	current (pA)
Time (ms)	30 uM 5-HT	100 uM cocaine
0	-0.105206	-0.0884823
0.100098	-0.102295	-0.0847778
0.200195	-0.100001	-0.0804037
0.299805	-0.0987563	-0.075632
0.399902	-0.0989204	-0.0707277
0.5	-0.100812	-0.0659575
0.600098	-0.104698	-0.061572
0.700195	-0.110782	-0.0578026
0.799805	-0.119183	-0.0548634
0.899902	-0.129934	-0.0528969
1	-0.142966	-0.0520224
1.1001	-0.158138	-0.0523628
1.2002	-0.17521	-0.054028
1.2998	-0.193825	-0.0571098
1.3999	-0.213585	-0.0616907
1.5	-0.234045	-0.0678386
1.6001	-0.254735	-0.0756306
1.7002	-0.275167	-0.0851173
1.7998	-0.294893	-0.0963263
1.8999	-0.313505	-0.109252
2	-0.330644	-0.123861
2.1001	-0.345987	-0.140087
2.2002	-0.359318	-0.157838
2.2998	-0.370518	-0.176973
2.3999	-0.379545	-0.197267
2.5	-0.386445	-0.218407
2.6001	-0.391362	-0.240054
2.7002	-0.394511	-0.261841
2.7998	-0.396182	-0.283386
2.8999	-0.396694	-0.304264
3	-0.396371	-0.32404
3.1001	-0.395547	-0.342283
3.2002	-0.394554	-0.358621
3.2998	-0.393731	-0.372775
3.3999	-0.393367	-0.384538
3.5	-0.393668	-0.39373
3.6001	-0.39478	-0.400251
3.7002	-0.396792	-0.404081
3.7998	-0.399748	-0.405322
3.8999	-0.403607	-0.404117
4	-0.408246	-0.400692
4.1001	-0.413515	-0.395298
4.2002	-0.419242	-0.388184
4.2998	-0.42522	-0.379599
4.3999	-0.431207	-0.369845
4.5	-0.436951	-0.359192
4.6001	-0.442207	-0.3479
4.7002	-0.44674	-0.336193
4.7998	-0.450378	-0.324219
4.8999	-0.452953	-0.312093
5	-0.454312	-0.299914
5.1001	-0.454337	-0.287725
5.2002	-0.452984	-0.275548
5.2998	-0.450247	-0.263373
5.3999	-0.446152	-0.251219
5.5	-0.440725	-0.23913
5.6001	-0.434002	-0.227135
5.7002	-0.42602	-0.215228
5.7998	-0.416877	-0.203464
5.8999	-0.406711	-0.191933
6	-0.395657	-0.180753
6.1001	-0.383826	-0.170075
6.2002	-0.371326	-0.160074
6.2998	-0.358261	-0.150924
6.3999	-0.34472	-0.142764
6.5	-0.330827	-0.13574
6.6001	-0.316714	-0.129937
6.7002	-0.302503	-0.125415
6.7998	-0.288321	-0.122211
6.8999	-0.274297	-0.120305
7	-0.260559	-0.11958
7.1001	-0.247246	-0.119889
7.2002	-0.234472	-0.121031
7.2998	-0.222321	-0.122755
7.3999	-0.210862	-0.12481
7.5	-0.200143	-0.126921
7.6001	-0.190178	-0.1288
7.7002	-0.180975	-0.130204
7.7998	-0.172497	-0.130908
7.8999	-0.164666	-0.130721
8	-0.157399	-0.129543
8.1001	-0.150598	-0.127353
8.2002	-0.144159	-0.124202
8.2998	-0.13798	-0.12017
8.3999	-0.131958	-0.115418
8.5	-0.125976	-0.110122
8.6001	-0.119915	-0.104485
8.7002	-0.113661	-0.098761
8.7998	-0.10715	-0.0931801
8.8999	-0.100392	-0.0879497
9	-0.0934255	-0.0832495
9.1001	-0.0862863	-0.0792312
9.2002	-0.0790463	-0.0760154
9.2998	-0.0717954	-0.0736612
9.3999	-0.0646139	-0.0721726
9.5	-0.0575971	-0.071526
9.6001	-0.0508677	-0.0716857
9.7002	-0.0445129	-0.0725612
9.7998	-0.0385821	-0.0740313
9.8999	-0.0331	-0.0759973
10	-0.0280408	-0.0783085
10.1001	-0.0233656	-0.0808005
10.2002	-0.0190217	-0.0833401
10.2998	-0.0149478	-0.0857829
10.3999	-0.0110603	-0.0879606
10.5	-0.00724295	-0.0897583
10.6001	-0.00338488	-0.0910658
10.7002	0.00060282	-0.0917601
10.7998	0.00478292	-0.0917339
10.8999	0.00918419	-0.090908
11	0.0138198	-0.0892605
11.1001	0.0186387	-0.0868091
11.2002	0.0235029	-0.0835618
11.2998	0.0282926	-0.0795569
11.3999	0.0328942	-0.07488
11.5	0.0371454	-0.0697121
11.6001	0.0408749	-0.0642432
11.7002	0.0439209	-0.0586814
11.7998	0.0461389	-0.0532636
11.8999	0.0474241	-0.0482616
12	0.0477206	-0.0439238
12.1001	0.0470443	-0.0405015
12.2002	0.0454475	-0.0382098
12.2998	0.043031	-0.0372347
12.3999	0.0399171	-0.0376925
12.5	0.036292	-0.0396661
12.6001	0.0323779	-0.0431632
12.7002	0.0284013	-0.048119
12.7998	0.0245913	-0.0544328
12.8999	0.021182	-0.0619239
13	0.0183692	-0.0703625
13.1001	0.0163333	-0.0795249
13.2002	0.0152157	-0.0890969
13.2998	0.0151148	-0.0987682
13.3999	0.0160845	-0.108235
13.5	0.0181315	-0.117238
13.6001	0.0212455	-0.125531
13.7002	0.0253604	-0.132905
13.7998	0.0303552	-0.1392
13.8999	0.0360901	-0.14435
14	0.0424002	-0.148362
14.1001	0.0490653	-0.15126
14.2002	0.0558263	-0.153103
14.2998	0.0624399	-0.154014
14.3999	0.0686634	-0.154166
14.5	0.0742531	-0.153751
14.6001	0.0789746	-0.152963
14.7002	0.0826047	-0.151997
14.7998	0.0849604	-0.151004
14.8999	0.0859025	-0.150129
15	0.0853322	-0.149507
15.1001	0.0832023	-0.149202
15.2002	0.0794892	-0.149212
15.2998	0.0741977	-0.149509
15.3999	0.067397	-0.150033
15.5	0.0591574	-0.150702
15.6001	0.0495562	-0.151402
15.7002	0.0387173	-0.15198
15.7998	0.0267906	-0.152286
15.8999	0.0139031	-0.152183
16	0.00018246	-0.151546
16.1001	-0.0142501	-0.150258
16.2002	-0.029274	-0.148227
16.2998	-0.0447775	-0.145401
16.3999	-0.0606786	-0.141756
16.5	-0.0769144	-0.137337
16.6001	-0.0934182	-0.132233
16.7002	-0.110098	-0.126548
16.7998	-0.126842	-0.120465
16.8999	-0.143505	-0.114203
17	-0.159968	-0.107999
17.1001	-0.176113	-0.102045
17.2002	-0.19179	-0.0965752
17.2998	-0.206843	-0.0918259
17.3999	-0.221133	-0.0880117
17.5	-0.234509	-0.0852999
17.6001	-0.24681	-0.0838303
17.7002	-0.257874	-0.0836982
17.7998	-0.267585	-0.0849318
17.8999	-0.275881	-0.0875272
18	-0.28274	-0.0914582
18.1001	-0.28815	-0.0966171
18.2002	-0.292108	-0.10285
18.2998	-0.294653	-0.109975
18.3999	-0.295866	-0.117817
18.5	-0.295865	-0.126148
18.6001	-0.294788	-0.134761
18.7002	-0.292802	-0.143505
18.7998	-0.290099	-0.15225
18.8999	-0.286904	-0.160886
19	-0.28348	-0.169317
19.1001	-0.280073	-0.177501
19.2002	-0.276886	-0.185461
19.2998	-0.274156	-0.193247
19.3999	-0.272147	-0.20092
19.5	-0.271074	-0.20857
19.6001	-0.271122	-0.216272
19.7002	-0.272446	-0.224104
19.7998	-0.275173	-0.232089
19.8999	-0.279384	-0.240227
20	-0.285109	-0.248478
20.1001	-0.292376	-0.256768
20.2002	-0.301176	-0.264995
20.2998	-0.311457	-0.273013
20.3999	-0.323129	-0.280587
20.5	-0.336058	-0.287473
20.6001	-0.35009	-0.293415
20.7002	-0.365057	-0.298143
20.7998	-0.38078	-0.301345
20.8999	-0.397073	-0.302745
21	-0.413727	-0.302096
21.1001	-0.430546	-0.299173
21.2002	-0.447322	-0.29382
21.2998	-0.463828	-0.285933
21.3999	-0.479845	-0.275452
21.5	-0.495192	-0.262376
21.6001	-0.509727	-0.246834
21.7002	-0.523304	-0.229011
21.7998	-0.535721	-0.209188
21.8999	-0.546783	-0.187683
22	-0.556358	-0.164872
22.1001	-0.564328	-0.141183
22.2002	-0.570609	-0.117137
22.2998	-0.575131	-0.0932612
22.3999	-0.577817	-0.0700778
22.5	-0.578638	-0.0481218
22.6001	-0.5776	-0.0279249
22.7002	-0.574727	-0.00995008
22.7998	-0.570091	0.00541838
22.8999	-0.563743	0.0179072
23	-0.555726	0.0273305
23.1001	-0.546106	0.0335809
23.2002	-0.534968	0.0366679
23.2998	-0.522411	0.0367313
23.3999	-0.508528	0.0340124
23.5	-0.493379	0.0288459
23.6001	-0.477035	0.0216294
23.7002	-0.459577	0.0128642
23.7998	-0.441082	0.00308617
23.8999	-0.421596	-0.00717155
24	-0.401155	-0.0174131
24.1001	-0.379796	-0.0271472
24.2002	-0.357561	-0.0359468
24.2998	-0.334512	-0.0434608
24.3999	-0.310706	-0.0494346
24.5	-0.286208	-0.0536923
24.6001	-0.261093	-0.0561327
24.7002	-0.235464	-0.0567502
24.7998	-0.209443	-0.0556177
24.8999	-0.183189	-0.0529055
25	-0.156859	-0.0488366
25.1001	-0.130642	-0.0436992
25.2002	-0.104774	-0.0377983
25.2998	-0.079499	-0.0314354
25.3999	-0.0550361	-0.0249252
25.5	-0.0316317	-0.0185813
25.6001	-0.00954145	-0.0126576
25.7002	0.0109896	-0.00735084
25.7998	0.0297691	-0.00281993
25.8999	0.0466464	0.000833592
26	0.061477	0.00351675
26.1001	0.0741654	0.00516327
26.2002	0.08466	0.00574311
26.2998	0.0929316	0.00525721
26.3999	0.0990176	0.00374754
26.5	0.102982	0.001278
26.6001	0.104929	-0.00209562
26.7002	0.104992	-0.00631134
26.7998	0.103339	-0.011289
26.8999	0.100153	-0.0169553
27	0.0955964	-0.0232577
27.1001	0.0898389	-0.0301184
27.2002	0.0830633	-0.037455
27.2998	0.075469	-0.0451745
27.3999	0.0672471	-0.0531925
27.5	0.0585869	-0.0614256
27.6001	0.0496844	-0.0698127
27.7002	0.0407218	-0.0782894
27.7998	0.0318773	-0.086791
27.8999	0.0233317	-0.0952353
28	0.0152695	-0.103531
28.1001	0.00789985	-0.111596
28.2002	0.00141682	-0.119409
28.2998	-0.00398749	-0.126968
28.3999	-0.00812864	-0.13429
28.5	-0.0108682	-0.141385
28.6001	-0.0121052	-0.148263
28.7002	-0.0117372	-0.154974
28.7998	-0.00970411	-0.161613
28.8999	-0.0060033	-0.168256
29	-0.00066046	-0.174953
29.1001	0.00625753	-0.181749
29.2002	0.0146369	-0.188663
29.2998	0.0243111	-0.195697
29.3999	0.0351077	-0.202821
29.5	0.0468316	-0.209954
29.6001	0.0592349	-0.216975
29.7002	0.0720879	-0.22374
29.7998	0.0851177	-0.230096
29.8999	0.0980326	-0.235872
30	0.110608	-0.240891
30.1001	0.122634	-0.244955
30.2002	0.13389	-0.247872
30.2998	0.144165	-0.249499
30.3999	0.15329	-0.24968
30.5	0.161169	-0.248279
30.6001	0.167705	-0.245211
30.7002	0.172796	-0.240417
30.7998	0.176398	-0.233891
30.8999	0.178487	-0.225697
31	0.179079	-0.215884
31.1001	0.17823	-0.204508
31.2002	0.176005	-0.191631
31.2998	0.172476	-0.177334
31.3999	0.167711	-0.161734
31.5	0.161789	-0.144967
31.6001	0.154803	-0.12718
31.7002	0.146851	-0.108514
31.7998	0.137982	-0.089107
31.8999	0.128249	-0.0691218
32	0.117722	-0.0487222
32.1001	0.106417	-0.0281147
32.2002	0.0943354	-0.00754015
32.2998	0.0814683	0.0127245
32.3999	0.0678093	0.0323974
32.5	0.0533615	0.051189
32.6001	0.0381125	0.0687734
32.7002	0.022041	0.084797
32.7998	0.00517559	0.0989533
32.8999	-0.0124258	0.110963
33	-0.0306813	0.120563
33.1001	-0.04948	0.127521
33.2002	-0.0686336	0.131676
33.2998	-0.0879225	0.132932
33.3999	-0.107087	0.131267
33.5	-0.125817	0.126742
33.6001	-0.143783	0.119478
33.7002	-0.160681	0.109681
33.7998	-0.176161	0.0976873
33.8999	-0.189846	0.0838929
34	-0.201367	0.068739
34.1001	-0.210422	0.0526906
34.2002	-0.216769	0.0362287
34.2998	-0.220191	0.0198699
34.3999	-0.220546	0.00411423
34.5	-0.217781	-0.0105733
34.6001	-0.211908	-0.0238136
34.7002	-0.202994	-0.035304
34.7998	-0.191182	-0.0448488
34.8999	-0.176721	-0.0523318
35	-0.159951	-0.0577349
35.1001	-0.141281	-0.0611719
35.2002	-0.121161	-0.062899
35.2998	-0.100079	-0.0632767
35.3999	-0.0785341	-0.0627236
35.5	-0.057069	-0.0617227
35.6001	-0.0362213	-0.0607776
35.7002	-0.0165002	-0.060389
35.7998	0.00160035	-0.0610513
35.8999	0.017599	-0.0632118
36	0.0310592	-0.0672621
36.1001	0.041636	-0.0734371
36.2002	0.0490571	-0.0818404
36.2998	0.0530865	-0.0924749
36.3999	0.0535828	-0.105236
36.5	0.0504729	-0.119898
36.6001	0.0437819	-0.136106
36.7002	0.0335975	-0.153404
36.7998	0.0200705	-0.17129
36.8999	0.00343762	-0.189219
37	-0.0160051	-0.206651
37.1001	-0.0379105	-0.223087
37.2002	-0.0618919	-0.238052
37.2998	-0.0875414	-0.251154
37.3999	-0.114421	-0.262114
37.5	-0.142052	-0.270736
37.6001	-0.169946	-0.276907
37.7002	-0.197644	-0.280605
37.7998	-0.224705	-0.281907
37.8999	-0.250685	-0.280991
38	-0.275203	-0.278115
38.1001	-0.297934	-0.273553
38.2002	-0.318575	-0.267591
38.2998	-0.3369	-0.260504
38.3999	-0.352749	-0.252605
38.5	-0.366014	-0.244158
38.6001	-0.376652	-0.235387
38.7002	-0.384668	-0.226497
38.7998	-0.390139	-0.217637
38.8999	-0.393227	-0.208875
39	-0.394122	-0.200233
39.1001	-0.393014	-0.191726
39.2002	-0.390139	-0.18335
39.2998	-0.385774	-0.175048
39.3999	-0.380159	-0.166717
39.5	-0.37351	-0.158214
39.6001	-0.366052	-0.149429
39.7002	-0.358023	-0.140292
39.7998	-0.34962	-0.130697
39.8999	-0.341003	-0.120524
40	-0.332306	-0.10972
40.1001	-0.323612	-0.0982665
40.2002	-0.315036	-0.0861687
40.2998	-0.306689	-0.0734195
40.3999	-0.298655	-0.0600618
40.5	-0.29099	-0.0461849
40.6001	-0.283754	-0.0319013
40.7002	-0.276991	-0.0173434
40.7998	-0.270761	-0.00269214
40.8999	-0.265151	0.0118442
41	-0.26024	0.0260731
41.1001	-0.25606	0.0397735
41.2002	-0.252645	0.0527044
41.2998	-0.250026	0.064642
41.3999	-0.248234	0.0753623
41.5	-0.247258	0.0846496
41.6001	-0.247044	0.0923415
41.7002	-0.247492	0.0982967
41.7998	-0.248513	0.102388
41.8999	-0.250008	0.104555
42	-0.251866	0.10479
42.1001	-0.253939	0.103123
42.2002	-0.256071	0.0996509
42.2998	-0.25812	0.094483
42.3999	-0.259981	0.0877486
42.5	-0.261543	0.0796281
42.6001	-0.262724	0.0703545
42.7002	-0.263466	0.0601736
42.7998	-0.263718	0.0493461
42.8999	-0.263443	0.0381018
43	-0.262613	0.0266686
43.1001	-0.261228	0.0152727
43.2002	-0.259341	0.00415286
43.2998	-0.257002	-0.00649158
43.3999	-0.254252	-0.0165033
43.5	-0.251123	-0.0257658
43.6001	-0.247644	-0.0341806
43.7002	-0.24385	-0.0416574
43.7998	-0.239748	-0.04815
43.8999	-0.23534	-0.0536079
44	-0.230647	-0.0580167
44.1001	-0.225712	-0.0614127
44.2002	-0.220591	-0.0638541
44.2998	-0.215337	-0.0653934
44.3999	-0.210032	-0.0660752
44.5	-0.204758	-0.0659651
44.6001	-0.199614	-0.0651487
44.7002	-0.194713	-0.0637216
44.7998	-0.190165	-0.0617775
44.8999	-0.186079	-0.0594262
45	-0.182558	-0.0567531
45.1001	-0.179685	-0.0538124
45.2002	-0.177473	-0.050671
45.2998	-0.175881	-0.047387
45.3999	-0.174875	-0.043991
45.5	-0.174385	-0.040544
45.6001	-0.174272	-0.0370874
45.7002	-0.174384	-0.0336126
45.7998	-0.174548	-0.0300807
45.8999	-0.174571	-0.0264959
46	-0.174243	-0.0228542
46.1001	-0.173385	-0.0191445
46.2002	-0.17187	-0.0153684
46.2998	-0.169602	-0.0115394
46.3999	-0.166539	-0.00766412
46.5	-0.162699	-0.0038232
46.6001	-0.158127	-9.48103e-05
46.7002	-0.152942	0.00343378
46.7998	-0.147285	0.00663861
46.8999	-0.141345	0.009348
47	-0.135351	0.0113436
47.1001	-0.129532	0.0124389
47.2002	-0.12408	0.0124532
47.2998	-0.119191	0.0111667
47.3999	-0.115064	0.0083824
47.5	-0.111831	0.0039049
47.6001	-0.109556	-0.00241462
47.7002	-0.108252	-0.0106634
47.7998	-0.10787	-0.0209088
47.8999	-0.108344	-0.0331658
48	-0.10961	-0.0473465
48.1001	-0.111549	-0.0632891
48.2002	-0.113963	-0.0807461
48.2998	-0.116663	-0.0994138
48.3999	-0.119513	-0.118929
48.5	-0.122383	-0.138886
48.6001	-0.125117	-0.158816
48.7002	-0.127594	-0.178211
48.7998	-0.129736	-0.196557
48.8999	-0.131472	-0.213376
49	-0.132775	-0.228246
49.1001	-0.133661	-0.240739
49.2002	-0.134163	-0.250501
49.2998	-0.134322	-0.257254
49.3999	-0.13419	-0.260762
49.5	-0.133848	-0.260887
49.6001	-0.133397	-0.257632
49.7002	-0.132942	-0.251088
49.7998	-0.132569	-0.241401
49.8999	-0.132342	-0.228763
50	-0.13232	-0.213451
50.1001	-0.13257	-0.19583
50.2002	-0.133163	-0.176327
50.2998	-0.134139	-0.155407
50.3999	-0.135508	-0.133533
50.5	-0.137316	-0.111172
50.6001	-0.139619	-0.0888023
50.7002	-0.142467	-0.0668801
50.7998	-0.145906	-0.0458221
50.8999	-0.149981	-0.0259966
51	-0.154703	-0.00771991
51.1001	-0.160102	0.00875052
51.2002	-0.166189	0.0231768
51.2998	-0.172935	0.0354286
51.3999	-0.180282	0.0454574
51.5	-0.188177	0.0532952
51.6001	-0.19655	0.059034
51.7002	-0.205281	0.0628587
51.7998	-0.214218	0.065002
51.8999	-0.223165	0.0657178
52	-0.231901	0.0653029
52.1001	-0.240174	0.0640651
52.2002	-0.247697	0.0623155
52.2998	-0.254167	0.0603453
52.3999	-0.259263	0.0584164
52.5	-0.262699	0.0567442
52.6001	-0.264235	0.0554896
52.7002	-0.263668	0.0547782
52.7998	-0.260808	0.0546928
52.8999	-0.255508	0.055265
53	-0.247713	0.0564438
53.1001	-0.237448	0.0581199
53.2002	-0.224831	0.0601631
53.2998	-0.210057	0.0624362
53.3999	-0.193385	0.0647775
53.5	-0.175142	0.0670248
53.6001	-0.155707	0.0690022
53.7002	-0.135509	0.0705348
53.7998	-0.115025	0.071456
53.8999	-0.0947887	0.0716678
54	-0.0753148	0.0710779
54.1001	-0.0570624	0.0696078
54.2002	-0.0404702	0.0672141
54.2998	-0.0259554	0.0638271
54.3999	-0.0138393	0.0594054
54.5	-0.00434782	0.0539475
54.6001	0.0023647	0.0474444
54.7002	0.00623631	0.0398842
54.7998	0.00726696	0.0312515
54.8999	0.00556711	0.0215641
55	0.00133038	0.0108529
55.1001	-0.00520512	-0.000871578
55.2002	-0.0137608	-0.0135998
55.2998	-0.0239998	-0.0272397
55.3999	-0.0355789	-0.0416922
55.5	-0.0481694	-0.0568079
55.6001	-0.0614478	-0.0724081
55.7002	-0.0750895	-0.0882715
55.7998	-0.0888069	-0.104138
55.8999	-0.102364	-0.119699
56	-0.115566	-0.134617
56.1001	-0.1283	-0.14855
56.2002	-0.140489	-0.16119
56.2998	-0.152037	-0.172199
56.3999	-0.162867	-0.18122
56.5	-0.172976	-0.187956
56.6001	-0.182407	-0.192164
56.7002	-0.191221	-0.193692
56.7998	-0.19947	-0.192431
56.8999	-0.207196	-0.188317
57	-0.21444	-0.181362
57.1001	-0.221245	-0.171672
57.2002	-0.227644	-0.159427
57.2998	-0.233659	-0.144869
57.3999	-0.23928	-0.128266
57.5	-0.244485	-0.109889
57.6001	-0.249244	-0.0900344
57.7002	-0.253494	-0.0690583
57.7998	-0.257189	-0.0473317
57.8999	-0.260267	-0.0252651
58	-0.262627	-0.00323049
58.1001	-0.264178	0.0183955
58.2002	-0.264864	0.0392404
58.2998	-0.264657	0.0589224
58.3999	-0.263542	0.0770613
58.5	-0.261539	0.0933057
58.6001	-0.258694	0.107326
58.7002	-0.255095	0.118801
58.7998	-0.250871	0.127455
58.8999	-0.246188	0.133087
59	-0.24127	0.135572
59.1001	-0.236349	0.134848
59.2002	-0.231672	0.130962
59.2998	-0.227516	0.124017
59.3999	-0.224112	0.114209
59.5	-0.221633	0.101867
59.6001	-0.22023	0.0873905
59.7002	-0.220031	0.0712205
59.7998	-0.221106	0.0538894
59.8999	-0.22346	0.0359479
60	-0.227009	0.0179196
60.1001	-0.231649	0.000365338
60.2002	-0.237226	-0.0162038
60.2998	-0.243534	-0.0313434
60.3999	-0.250334	-0.0447292
60.5	-0.257325	-0.056127
60.6001	-0.264195	-0.0653648
60.7002	-0.270672	-0.0723819
60.7998	-0.276531	-0.0772242
60.8999	-0.281554	-0.0800437
61	-0.28553	-0.081067
61.1001	-0.288289	-0.0805663
61.2002	-0.289728	-0.0788387
61.2998	-0.289825	-0.0762166
61.3999	-0.288608	-0.0730781
61.5	-0.286166	-0.0697874
61.6001	-0.282644	-0.0666498
61.7002	-0.278225	-0.063918
61.7998	-0.273126	-0.061829
61.8999	-0.267599	-0.0605611
62	-0.261951	-0.0601896
62.1001	-0.256498	-0.0607561
62.2002	-0.251526	-0.0622586
62.2998	-0.2473	-0.0646376
62.3999	-0.244098	-0.0677723
62.5	-0.242155	-0.0715012
62.6001	-0.241653	-0.0756106
62.7002	-0.242726	-0.0798883
62.7998	-0.245439	-0.0841183
62.8999	-0.249786	-0.088077
63	-0.25569	-0.0915498
63.1001	-0.263002	-0.0943374
63.2002	-0.271509	-0.0963201
63.2998	-0.280931	-0.0974325
63.3999	-0.290965	-0.0976299
63.5	-0.301275	-0.0969152
63.6001	-0.311497	-0.0953855
63.7002	-0.321271	-0.0932058
63.7998	-0.33026	-0.0905952
63.8999	-0.338123	-0.0878209
64	-0.344554	-0.0852045
64.1001	-0.349313	-0.0830731
64.2002	-0.352249	-0.0817603
64.2998	-0.35329	-0.0816158
64.3999	-0.352418	-0.0829705
64.5	-0.349677	-0.0860824
64.6001	-0.345183	-0.0911802
64.7002	-0.339102	-0.0984115
64.7998	-0.331655	-0.107828
64.8999	-0.323083	-0.119389
65	-0.31363	-0.132966
65.1001	-0.303549	-0.148339
65.2002	-0.293093	-0.165212
65.2998	-0.282505	-0.183231
65.3999	-0.272004	-0.202007
65.5	-0.261737	-0.22111
65.6001	-0.251814	-0.240038
65.7002	-0.242325	-0.258288
65.7998	-0.23329	-0.275391
65.8999	-0.224701	-0.290875
66	-0.216535	-0.304331
66.1001	-0.208766	-0.315392
66.2002	-0.201324	-0.323767
66.2998	-0.194102	-0.329243
66.3999	-0.18702	-0.331687
66.5	-0.18003	-0.331066
66.6001	-0.173114	-0.327416
66.7002	-0.166245	-0.320883
66.7998	-0.159407	-0.311658
66.8999	-0.152614	-0.299983
67	-0.145915	-0.286179
67.1001	-0.139383	-0.270627
67.2002	-0.133083	-0.25375
67.2998	-0.127079	-0.235984
67.3999	-0.121464	-0.217759
67.5	-0.116348	-0.199522
67.6001	-0.111844	-0.181705
67.7002	-0.108022	-0.164679
67.7998	-0.104945	-0.148798
67.8999	-0.10268	-0.134353
68	-0.101259	-0.121582
68.1001	-0.100689	-0.110678
68.2002	-0.101003	-0.101777
68.2998	-0.102196	-0.094942
68.3999	-0.104243	-0.090198
68.5	-0.10712	-0.0875372
68.6001	-0.110785	-0.0869364
68.7002	-0.115146	-0.0883321
68.7998	-0.12009	-0.0916409
68.8999	-0.125522	-0.0967449
69	-0.131313	-0.103492
69.1001	-0.137303	-0.111744
69.2002	-0.143309	-0.121399
69.2998	-0.149138	-0.132331
69.3999	-0.154571	-0.144352
69.5	-0.159374	-0.157284
69.6001	-0.163311	-0.170963
69.7002	-0.166138	-0.185179
69.7998	-0.167623	-0.19971
69.8999	-0.167529	-0.214339
70	-0.165633	-0.228825
70.1001	-0.161789	-0.242905
70.2002	-0.155903	-0.256294
70.2998	-0.14791	-0.268722
70.3999	-0.137814	-0.279931
70.5	-0.125697	-0.289676
70.6001	-0.111694	-0.297742
70.7002	-0.0959962	-0.303928
70.7998	-0.0788697	-0.308096
70.8999	-0.0606518	-0.310167
71	-0.0417038	-0.310132
71.1001	-0.0224329	-0.307999
71.2002	-0.00324206	-0.303809
71.2998	0.0154465	-0.297671
71.3999	0.0332548	-0.289787
71.5	0.0498231	-0.280361
71.6001	0.0648211	-0.269599
71.7002	0.0779456	-0.257766
71.7998	0.0889674	-0.245132
71.8999	0.0977268	-0.23199
72	0.104118	-0.218614
72.1001	0.108101	-0.20527
72.2002	0.109675	-0.192198
72.2998	0.108869	-0.179608
72.3999	0.105746	-0.167701
72.5	0.100434	-0.156655
72.6001	0.0931279	-0.146583
72.7002	0.0840512	-0.137594
72.7998	0.0734296	-0.129762
72.8999	0.061469	-0.123106
73	0.0483764	-0.117657
73.1001	0.034378	-0.113429
73.2002	0.0197092	-0.110365
73.2998	0.00464454	-0.108394
73.3999	-0.0105699	-0.107429
73.5	-0.0256969	-0.107381
73.6001	-0.0404994	-0.108177
73.7002	-0.0547246	-0.109756
73.7998	-0.0681675	-0.11204
73.8999	-0.080627	-0.114957
74	-0.0918705	-0.11842
74.1001	-0.101632	-0.122325
74.2002	-0.109681	-0.126577
74.2998	-0.115845	-0.131093
74.3999	-0.119914	-0.135794
74.5	-0.121672	-0.140573
74.6001	-0.120931	-0.145328
74.7002	-0.117547	-0.149932
74.7998	-0.111405	-0.154271
74.8999	-0.102428	-0.158206
75	-0.0905976	-0.161549
75.1001	-0.0759611	-0.164113
75.2002	-0.0586637	-0.165743
75.2998	-0.0389047	-0.166315
75.3999	-0.0169612	-0.165736
75.5	0.00683463	-0.163957
75.6001	0.0321064	-0.160969
75.7002	0.0583911	-0.156836
75.7998	0.0851375	-0.151657
75.8999	0.111769	-0.145613
76	0.137693	-0.139007
76.1001	0.16234	-0.132189
76.2002	0.185177	-0.125537
76.2998	0.205696	-0.119451
76.3999	0.223453	-0.114359
76.5	0.238081	-0.110666
76.6001	0.249319	-0.108738
76.7002	0.256995	-0.108887
76.7998	0.261036	-0.111326
76.8999	0.261462	-0.116158
77	0.258375	-0.123353
77.1001	0.251965	-0.132726
77.2002	0.242511	-0.143964
77.2998	0.230349	-0.156678
77.3999	0.215845	-0.170381
77.5	0.199397	-0.184495
77.6001	0.181429	-0.198388
77.7002	0.162337	-0.211387
77.7998	0.142498	-0.222841
77.8999	0.122249	-0.232158
78	0.101885	-0.238851
78.1001	0.0816935	-0.242535
78.2002	0.0619274	-0.242957
78.2998	0.0427741	-0.240019
78.3999	0.0243729	-0.233791
78.5	0.00684291	-0.224461
78.6001	-0.00972411	-0.212352
78.7002	-0.0252802	-0.197903
78.7998	-0.0397607	-0.181624
78.8999	-0.0531008	-0.164115
79	-0.0652539	-0.146002
79.1001	-0.076184	-0.127908
79.2002	-0.0858827	-0.11042
79.2998	-0.0943326	-0.0940498
79.3999	-0.101502	-0.0792421
79.5	-0.107356	-0.0663628
79.6001	-0.111882	-0.0556525
79.7002	-0.1151	-0.0472283
79.7998	-0.117064	-0.0411209
79.8999	-0.117873	-0.0372504
80	-0.117625	-0.0354852
80.1001	-0.11643	-0.0356387
80.2002	-0.114444	-0.0374521
80.2998	-0.111879	-0.0406551
80.3999	-0.108983	-0.0449771
80.5	-0.106059	-0.0501575
80.6001	-0.103456	-0.055992
80.7002	-0.101503	-0.062292
80.7998	-0.100525	-0.0688929
80.8999	-0.100832	-0.0756754
81	-0.102706	-0.0825404
81.1001	-0.106399	-0.0894217
81.2002	-0.112129	-0.096271
81.2998	-0.120092	-0.103073
81.3999	-0.130399	-0.109825
81.5	-0.143096	-0.116522
81.6001	-0.158154	-0.123135
81.7002	-0.175498	-0.129611
81.7998	-0.194991	-0.135883
81.8999	-0.216453	-0.141856
82	-0.239662	-0.147446
82.1001	-0.264387	-0.152575
82.2002	-0.290361	-0.157144
82.2998	-0.31727	-0.161057
82.3999	-0.344811	-0.164215
82.5	-0.372684	-0.166557
82.6001	-0.400582	-0.168002
82.7002	-0.428236	-0.168491
82.7998	-0.4554	-0.168005
82.8999	-0.48179	-0.166528
83	-0.507108	-0.16406
83.1001	-0.531107	-0.160637
83.2002	-0.553591	-0.156301
83.2998	-0.574396	-0.15111
83.3999	-0.593348	-0.14512
83.5	-0.610292	-0.138378
83.6001	-0.625098	-0.130961
83.7002	-0.637662	-0.122959
83.7998	-0.64786	-0.114489
83.8999	-0.655591	-0.105637
84	-0.660792	-0.0964665
84.1001	-0.663462	-0.0870699
84.2002	-0.663635	-0.0775828
84.2998	-0.661358	-0.0681347
84.3999	-0.656698	-0.0588183
84.5	-0.649757	-0.049724
84.6001	-0.64068	-0.0409865
84.7002	-0.629657	-0.0327348
84.7998	-0.616893	-0.0250968
84.8999	-0.602592	-0.018175
85	-0.58699	-0.0120749
85.1001	-0.570388	-0.00690786
85.2002	-0.553118	-0.00275938
85.2998	-0.535492	0.000341496
85.3999	-0.517791	0.00236281
85.5	-0.500298	0.00325688
85.6001	-0.483273	0.00299748
85.7002	-0.466903	0.00155838
85.7998	-0.451359	-0.00104992
85.8999	-0.436751	-0.00482074
86	-0.423122	-0.00971071
86.1001	-0.410432	-0.0156383
86.2002	-0.398586	-0.0225166
86.2998	-0.387451	-0.0302509
86.3999	-0.376854	-0.0386905
86.5	-0.366607	-0.0476689
86.6001	-0.356488	-0.0569848
86.7002	-0.346286	-0.0663761
86.7998	-0.335855	-0.0755381
86.8999	-0.325087	-0.084175
87	-0.313873	-0.0919828
87.1001	-0.302165	-0.0986585
87.2002	-0.289983	-0.10392
87.2998	-0.277422	-0.107474
87.3999	-0.264618	-0.10906
87.5	-0.251737	-0.10845
87.6001	-0.23899	-0.105503
87.7002	-0.22661	-0.100138
87.7998	-0.214844	-0.0923356
87.8999	-0.203904	-0.082147
88	-0.193972	-0.0696797
88.1001	-0.185192	-0.0551256
88.2002	-0.177649	-0.0387692
88.2998	-0.171352	-0.0209164
88.3999	-0.166273	-0.00187341
88.5	-0.162333	0.0180455
88.6001	-0.159421	0.0384785
88.7002	-0.157406	0.0590402
88.7998	-0.156133	0.0793205
88.8999	-0.155433	0.0989428
89	-0.155148	0.117534
89.1001	-0.155138	0.134714
89.2002	-0.155249	0.150138
89.2998	-0.155365	0.163483
89.3999	-0.155429	0.174444
89.5	-0.155412	0.182755
89.6001	-0.155324	0.188166
89.7002	-0.155182	0.190411
89.7998	-0.15501	0.189255
89.8999	-0.154871	0.184561
90	-0.154856	0.176289
90.1001	-0.155056	0.164494
90.2002	-0.155557	0.149301
90.2998	-0.156444	0.130925
90.3999	-0.157783	0.109704
90.5	-0.159607	0.0860577
90.6001	-0.161931	0.0604878
90.7002	-0.164764	0.0335852
90.7998	-0.168091	0.005982
90.8999	-0.171895	-0.0216712
91	-0.17613	-0.048665
91.1001	-0.180723	-0.0743059
91.2002	-0.18556	-0.097979
91.2998	-0.190542	-0.119165
91.3999	-0.195608	-0.137424
91.5	-0.200714	-0.152469
91.6001	-0.205818	-0.164132
91.7002	-0.210866	-0.172359
91.7998	-0.215836	-0.177263
91.8999	-0.220751	-0.179133
92	-0.22566	-0.178363
92.1001	-0.230595	-0.175442
92.2002	-0.235604	-0.170931
92.2998	-0.240784	-0.165459
92.3999	-0.246209	-0.159715
92.5	-0.251915	-0.154368
92.6001	-0.257952	-0.150014
92.7002	-0.264341	-0.14715
92.7998	-0.27109	-0.146202
92.8999	-0.278179	-0.147521
93	-0.285542	-0.151316
93.1001	-0.293045	-0.157642
93.2002	-0.300509	-0.166423
93.2998	-0.307735	-0.177482
93.3999	-0.314546	-0.190499
93.5	-0.320716	-0.20506
93.6001	-0.326008	-0.220662
93.7002	-0.330213	-0.236722
93.7998	-0.333118	-0.252651
93.8999	-0.334506	-0.26786
94	-0.334172	-0.281802
94.1001	-0.331985	-0.293961
94.2002	-0.327873	-0.303846
94.2998	-0.321809	-0.311016
94.3999	-0.313791	-0.315126
94.5	-0.303865	-0.315966
94.6001	-0.292124	-0.313433
94.7002	-0.278684	-0.307546
94.7998	-0.263705	-0.298414
94.8999	-0.247423	-0.286182
95	-0.230149	-0.271093
95.1001	-0.212225	-0.253513
95.2002	-0.193992	-0.233889
95.2998	-0.175807	-0.212723
95.3999	-0.158061	-0.190554
95.5	-0.141161	-0.167956
95.6001	-0.125496	-0.145521
95.7002	-0.111434	-0.123816
95.7998	-0.0993155	-0.10337
95.8999	-0.0894802	-0.0846886
96	-0.0822338	-0.068211
96.1001	-0.0778036	-0.0542864
96.2002	-0.0763401	-0.0431594
96.2998	-0.0779257	-0.0350107
96.3999	-0.0825724	-0.0299224
96.5	-0.0902114	-0.0278353
96.6001	-0.100698	-0.0285849
96.7002	-0.113832	-0.0319256
96.7998	-0.129335	-0.0375137
96.8999	-0.146876	-0.0449452
97	-0.166065	-0.0537523
97.1001	-0.186489	-0.0634355
97.2002	-0.20775	-0.073542
97.2998	-0.229408	-0.0836348
97.3999	-0.251024	-0.0933065
97.5	-0.272149	-0.102219
97.6001	-0.292382	-0.110072
97.7002	-0.311365	-0.116618
97.7998	-0.328778	-0.1217
97.8999	-0.344335	-0.125239
98	-0.357824	-0.12725
98.1001	-0.369097	-0.127799
98.2002	-0.378096	-0.126991
98.2998	-0.384822	-0.124978
98.3999	-0.389337	-0.121959
98.5	-0.391759	-0.118127
98.6001	-0.392252	-0.113662
98.7002	-0.391009	-0.108726
98.7998	-0.388264	-0.103442
98.8999	-0.38427	-0.0979094
99	-0.379286	-0.0922212
99.1001	-0.373596	-0.0864405
99.2002	-0.367473	-0.0806026
99.2998	-0.361163	-0.0747027
99.3999	-0.354881	-0.0687431
99.5	-0.34882	-0.0626673
99.6001	-0.343168	-0.0564508
99.7002	-0.338081	-0.0501017
99.7998	-0.333667	-0.0436525
99.8999	-0.329994	-0.0371532
100	-0.32711	-0.0307011
100.1	-0.32504	-0.0244178
100.2	-0.323787	-0.0184683
100.3	-0.323328	-0.01304
100.4	-0.323653	-0.00832597
100.5	-0.324761	-0.00451652
100.6	-0.326601	-0.00180236
100.7	-0.329095	-0.000386635
100.8	-0.33215	-0.000385681
100.9	-0.335673	-0.00184719
101	-0.339565	-0.00478593
101.1	-0.343713	-0.00916616
101.2	-0.347992	-0.0148501
101.3	-0.352269	-0.0216216
101.4	-0.356376	-0.0292105
101.5	-0.360161	-0.0372538
101.6	-0.363475	-0.0453591
101.7	-0.366147	-0.0531568
101.8	-0.368007	-0.0602516
101.9	-0.368877	-0.0662736
102	-0.368588	-0.0709075
102.1	-0.36698	-0.073883
102.2	-0.363885	-0.0750164
102.3	-0.359138	-0.0742444
102.4	-0.352641	-0.0716113
102.5	-0.34436	-0.0672444
102.6	-0.33432	-0.0613374
102.7	-0.322581	-0.0541333
102.8	-0.3092	-0.0459603
102.9	-0.29425	-0.0372209
103	-0.277854	-0.0283617
103.1	-0.260214	-0.0197949
103.2	-0.241597	-0.0119151
103.3	-0.222306	-0.00508157
103.4	-0.202708	0.000411114
103.5	-0.183159	0.00434502
103.6	-0.163991	0.00657137
103.7	-0.145539	0.00700816
103.8	-0.128138	0.00563916
103.9	-0.11209	0.00254544
104	-0.0976603	-0.00215952
104.1	-0.0850991	-0.00828306
104.2	-0.0746301	-0.0155949
104.3	-0.0664009	-0.0238914
104.4	-0.0604859	-0.0329575
104.5	-0.0569284	-0.0426234
104.6	-0.0557256	-0.0527262
104.7	-0.0568219	-0.0631422
104.8	-0.0601376	-0.0738019
104.9	-0.0655927	-0.0846891
105	-0.0730899	-0.095848
105.1	-0.0825327	-0.107364
105.2	-0.0938085	-0.119313
105.3	-0.106788	-0.1318
105.4	-0.121338	-0.144922
105.5	-0.13736	-0.158783
105.6	-0.154757	-0.173531
105.7	-0.17341	-0.189243
105.8	-0.193179	-0.205934
105.9	-0.213912	-0.223576
106	-0.235418	-0.242082
106.1	-0.257472	-0.261345
106.2	-0.279811	-0.281188
106.3	-0.302189	-0.301378
106.4	-0.324321	-0.321631
106.5	-0.345906	-0.341635
106.6	-0.366624	-0.36108
106.7	-0.38619	-0.379638
106.8	-0.404337	-0.396977
106.9	-0.420828	-0.412783
107	-0.435493	-0.426758
107.1	-0.448208	-0.438616
107.2	-0.458899	-0.448116
107.3	-0.467566	-0.455056
107.4	-0.474309	-0.459286
107.5	-0.479279	-0.46074
107.6	-0.482653	-0.459371
107.7	-0.484695	-0.455177
107.8	-0.48574	-0.448195
107.9	-0.486115	-0.438556
108	-0.486134	-0.426459
108.1	-0.486096	-0.412123
108.2	-0.486255	-0.395835
108.3	-0.486852	-0.377935
108.4	-0.488074	-0.358777
108.5	-0.490039	-0.338766
108.6	-0.492776	-0.318328
108.7	-0.496271	-0.297867
108.8	-0.500483	-0.277794
108.9	-0.505314	-0.258485
109	-0.510597	-0.240245
109.1	-0.516137	-0.223345
109.2	-0.521709	-0.207994
109.3	-0.52703	-0.194372
109.4	-0.531771	-0.18255
109.5	-0.535651	-0.172564
109.6	-0.538417	-0.164359
109.7	-0.539826	-0.157816
109.8	-0.539646	-0.152806
109.9	-0.5377	-0.149147
110	-0.533832	-0.146647
110.1	-0.527887	-0.145134
110.2	-0.519745	-0.144436
110.3	-0.509334	-0.144389
110.4	-0.496622	-0.144872
110.5	-0.481606	-0.145816
110.6	-0.464352	-0.147213
110.7	-0.445008	-0.149074
110.8	-0.423752	-0.15139
110.9	-0.400781	-0.154137
111	-0.376316	-0.157308
111.1	-0.3506	-0.160883
111.2	-0.323912	-0.164828
111.3	-0.296559	-0.169074
111.4	-0.268836	-0.173507
111.5	-0.241062	-0.177998
111.6	-0.213558	-0.182373
111.7	-0.186633	-0.186413
111.8	-0.160561	-0.189872
111.9	-0.13559	-0.192544
112	-0.111914	-0.194227
112.1	-0.089689	-0.194751
112.2	-0.0690266	-0.19398
112.3	-0.0500109	-0.191828
112.4	-0.0326763	-0.188304
112.5	-0.0170202	-0.183461
112.6	-0.00300484	-0.177435
112.7	0.00942527	-0.170456
112.8	0.0203363	-0.162813
112.9	0.029828	-0.154799
113	0.0380047	-0.146731
113.1	0.0449847	-0.139009
113.2	0.0508652	-0.132043
113.3	0.055711	-0.126231
113.4	0.0595854	-0.121903
113.5	0.0625448	-0.119327
113.6	0.0646346	-0.118714
113.7	0.0658643	-0.12017
113.8	0.0662325	-0.123729
113.9	0.0657584	-0.12935
114	0.0644465	-0.136881
114.1	0.0622891	-0.146048
114.2	0.0592855	-0.156496
114.3	0.0554663	-0.167767
114.4	0.0508458	-0.179362
114.5	0.0454232	-0.190741
114.6	0.0392014	-0.20134
114.7	0.0322224	-0.210589
114.8	0.0245432	-0.217987
114.9	0.0162174	-0.223059
115	0.00731367	-0.225416
115.1	-0.0021246	-0.224785
115.2	-0.0120397	-0.221015
115.3	-0.0223427	-0.214081
115.4	-0.0329375	-0.204056
115.5	-0.0437577	-0.191139
115.6	-0.0547587	-0.175675
115.7	-0.0658566	-0.158077
115.8	-0.0769556	-0.138818
115.9	-0.0880008	-0.11841
116	-0.0989739	-0.0973634
116.1	-0.109888	-0.0762314
116.2	-0.120774	-0.0555047
116.3	-0.131601	-0.0356387
116.4	-0.142377	-0.0170268
116.5	-0.153172	7.2329e-06
116.6	-0.164065	0.0152298
116.7	-0.175125	0.0284563
116.8	-0.186389	0.0395628
116.9	-0.197886	0.0484649
117	-0.209618	0.0551101
117.1	-0.221528	0.0594703
117.2	-0.233539	0.0615092
117.3	-0.245578	0.0612293
117.4	-0.25755	0.0586577
117.5	-0.269258	0.0538455
117.6	-0.280462	0.0468384
117.7	-0.290945	0.0377079
117.8	-0.300525	0.0265613
117.9	-0.309048	0.013537
118	-0.316406	-0.00115625
118.1	-0.322541	-0.0172304
118.2	-0.327445	-0.0343336
118.3	-0.331196	-0.0520314
118.4	-0.33394	-0.0698117
118.5	-0.3359	-0.0871209
118.6	-0.337352	-0.103384
118.7	-0.338627	-0.118034
118.8	-0.340139	-0.130545
118.9	-0.342312	-0.140418
119	-0.34552	-0.147204
119.1	-0.350112	-0.150546
119.2	-0.356372	-0.150247
119.3	-0.364518	-0.146299
119.4	-0.374676	-0.138863
119.5	-0.386891	-0.128222
119.6	-0.401128	-0.114822
119.7	-0.417256	-0.0992855
119.8	-0.435056	-0.0823502
119.9	-0.454211	-0.0647902
120	-0.47437	-0.0474476
120.1	-0.495152	-0.0311808
120.2	-0.516177	-0.0168637
120.3	-0.537025	-0.00526706
120.4	-0.557291	0.00293883
120.5	-0.576632	0.00721272
120.6	-0.594775	0.00716217
120.7	-0.61151	0.0025998
120.8	-0.626653	-0.00650684
120.9	-0.640074	-0.0200257
121	-0.651716	-0.0376519
121.1	-0.661605	-0.058874
121.2	-0.669817	-0.0830273
121.3	-0.676456	-0.109366
121.4	-0.681645	-0.137106
121.5	-0.685499	-0.165399
121.6	-0.688129	-0.193361
121.7	-0.689643	-0.220154
121.8	-0.690135	-0.245011
121.9	-0.689689	-0.267236
122	-0.688332	-0.28623
122.1	-0.686046	-0.301542
122.2	-0.682775	-0.312862
122.3	-0.678406	-0.320043
122.4	-0.67278	-0.323074
122.5	-0.665706	-0.322086
122.6	-0.657019	-0.317368
122.7	-0.646561	-0.309321
122.8	-0.634187	-0.298441
122.9	-0.619787	-0.285301
123	-0.603293	-0.270519
123.1	-0.584674	-0.254719
123.2	-0.563986	-0.238556
123.3	-0.541352	-0.222674
123.4	-0.516984	-0.207644
123.5	-0.491162	-0.193948
123.6	-0.464199	-0.181989
123.7	-0.436462	-0.172089
123.8	-0.408328	-0.164438
123.9	-0.380193	-0.159145
124	-0.352485	-0.156224
124.1	-0.32561	-0.155557
124.2	-0.299912	-0.156963
124.3	-0.275724	-0.160191
124.4	-0.253312	-0.164932
124.5	-0.232848	-0.170846
124.6	-0.21447	-0.177571
124.7	-0.198267	-0.184743
124.8	-0.184284	-0.192013
124.9	-0.17251	-0.199048
125	-0.162923	-0.205495
125.1	-0.155451	-0.211078
125.2	-0.14998	-0.215583
125.3	-0.146373	-0.218866
125.4	-0.144524	-0.220851
125.5	-0.144318	-0.221494
125.6	-0.14564	-0.220802
125.7	-0.14836	-0.218825
125.8	-0.15233	-0.21567
125.9	-0.157395	-0.211483
126	-0.163388	-0.206463
126.1	-0.170126	-0.200827
126.2	-0.177435	-0.194811
126.3	-0.185132	-0.188658
126.4	-0.193032	-0.182614
126.5	-0.200953	-0.17691
126.6	-0.208712	-0.171774
126.7	-0.216118	-0.167369
126.8	-0.222982	-0.163831
126.9	-0.229157	-0.161255
127	-0.234549	-0.159722
127.1	-0.239084	-0.15923
127.2	-0.24275	-0.15972
127.3	-0.245601	-0.161066
127.4	-0.247715	-0.163105
127.5	-0.249196	-0.165645
127.6	-0.250177	-0.168456
127.7	-0.250827	-0.171246
127.8	-0.251335	-0.173714
127.9	-0.251902	-0.175605
128	-0.252715	-0.176667
128.1	-0.253935	-0.176673
128.2	-0.255685	-0.175387
128.3	-0.258083	-0.172621
128.4	-0.261189	-0.168291
128.5	-0.26499	-0.16239
128.6	-0.269442	-0.154995
128.7	-0.274481	-0.14626
128.8	-0.28	-0.136363
128.9	-0.285873	-0.125578
129	-0.291934	-0.114245
129.1	-0.297965	-0.102755
129.2	-0.303788	-0.0915398
129.3	-0.309279	-0.0810484
129.4	-0.314339	-0.0717119
129.5	-0.318852	-0.0639495
129.6	-0.322696	-0.0581803
129.7	-0.32577	-0.0547723
129.8	-0.328002	-0.0539736
129.9	-0.329348	-0.0559782
130	-0.329793	-0.0609359
130.1	-0.329335	-0.068901
130.2	-0.327976	-0.0798391
130.3	-0.325728	-0.0936259
130.4	-0.322608	-0.110025
130.5	-0.318613	-0.128699
130.6	-0.313717	-0.149248
130.7	-0.307932	-0.171216
130.8	-0.301302	-0.194104
130.9	-0.293895	-0.217333
131	-0.285801	-0.240276
131.1	-0.27715	-0.262319
131.2	-0.268119	-0.282821
131.3	-0.25892	-0.301182
131.4	-0.24977	-0.316841
131.5	-0.240944	-0.329294
131.6	-0.232743	-0.338083
131.7	-0.225456	-0.342881
131.8	-0.219374	-0.34346
131.9	-0.214769	-0.339683
132	-0.21187	-0.331529
132.1	-0.210827	-0.319154
132.2	-0.211737	-0.302804
132.3	-0.214615	-0.282871
132.4	-0.219365	-0.259838
132.5	-0.225806	-0.234309
132.6	-0.233702	-0.206941
132.7	-0.242715	-0.178471
132.8	-0.252439	-0.149659
132.9	-0.262398	-0.121284
133	-0.27208	-0.0941557
133.1	-0.280994	-0.0690154
133.2	-0.288662	-0.0465469
133.3	-0.29462	-0.0273441
133.4	-0.298437	-0.0119247
133.5	-0.299778	-0.000712791
133.6	-0.298401	0.0059677
133.7	-0.294168	0.00790795
133.8	-0.28704	0.00500163
133.9	-0.277061	-0.00274507
134	-0.264383	-0.0152268
134.1	-0.249277	-0.0322327
134.2	-0.232054	-0.0534448
134.3	-0.213048	-0.0784625
134.4	-0.192622	-0.106779
134.5	-0.171169	-0.13782
134.6	-0.149078	-0.170945
134.7	-0.126755	-0.205469
134.8	-0.104609	-0.240656
134.9	-0.083016	-0.27576
135	-0.0622527	-0.309992
135.1	-0.0425233	-0.342584
135.2	-0.0240058	-0.37279
135.3	-0.0068326	-0.399923
135.4	0.00887674	-0.423365
135.5	0.0230558	-0.44256
135.6	0.0356587	-0.457045
135.7	0.0466805	-0.466512
135.8	0.0561494	-0.470785
135.9	0.0640924	-0.469823
136	0.0705358	-0.463718
136.1	0.0754934	-0.452695
136.2	0.0789957	-0.437103
136.3	0.0810938	-0.417426
136.4	0.0818388	-0.394246
136.5	0.0812688	-0.368189
136.6	0.0794435	-0.339926
136.7	0.0764216	-0.310166
136.8	0.0722731	-0.279627
136.9	0.0670789	-0.248992
137	0.0609286	-0.218908
137.1	0.0539269	-0.18997
137.2	0.046201	-0.16266
137.3	0.0379106	-0.137388
137.4	0.0291977	-0.114502
137.5	0.0201608	-0.0942649
137.6	0.0108979	-0.076858
137.7	0.00155733	-0.0623993
137.8	-0.00772859	-0.0509414
137.9	-0.016861	-0.042468
138	-0.0257684	-0.0368895
138.1	-0.0343946	-0.0340771
138.2	-0.0427186	-0.0338644
138.3	-0.0507684	-0.0360474
138.4	-0.0585994	-0.0404338
138.5	-0.066305	-0.0468125
138.6	-0.0739874	-0.0549111
138.7	-0.0817507	-0.064424
138.8	-0.0897161	-0.0750274
138.9	-0.0980096	-0.0864267
139	-0.106745	-0.0983237
139.1	-0.116001	-0.110406
139.2	-0.12583	-0.12238
139.3	-0.136273	-0.133965
139.4	-0.147336	-0.144929
139.5	-0.158956	-0.15506
139.6	-0.171058	-0.164199
139.7	-0.183537	-0.172219
139.8	-0.196263	-0.179043
139.9	-0.209086	-0.184676
140	-0.221829	-0.189171
140.1	-0.234337	-0.192605
140.2	-0.246488	-0.195087
140.3	-0.258158	-0.196787
140.4	-0.269238	-0.197907
140.5	-0.279686	-0.198638
140.6	-0.289488	-0.199182
140.7	-0.298649	-0.199707
140.8	-0.30721	-0.200384
140.9	-0.315258	-0.201371
141	-0.322915	-0.202787
141.1	-0.330285	-0.20472
141.2	-0.337437	-0.207253
141.3	-0.34445	-0.210434
141.4	-0.351418	-0.214246
141.5	-0.358446	-0.21866
141.6	-0.36559	-0.223641
141.7	-0.372865	-0.229111
141.8	-0.380247	-0.234965
141.9	-0.3877	-0.241095
142	-0.395196	-0.247381
142.1	-0.402688	-0.253699
142.2	-0.410135	-0.259938
142.3	-0.417506	-0.265983
142.4	-0.424746	-0.271712
142.5	-0.431739	-0.276974
142.6	-0.438401	-0.281629
142.7	-0.444663	-0.285544
142.8	-0.45044	-0.288613
142.9	-0.45562	-0.290728
143	-0.460123	-0.291778
143.1	-0.463867	-0.291655
143.2	-0.46676	-0.290284
143.3	-0.468691	-0.287626
143.4	-0.469545	-0.283692
143.5	-0.469265	-0.278528
143.6	-0.467824	-0.272217
143.7	-0.465228	-0.264868
143.8	-0.461511	-0.256616
143.9	-0.456743	-0.247628
144	-0.451061	-0.238085
144.1	-0.444663	-0.228233
144.2	-0.437783	-0.21834
144.3	-0.430725	-0.208653
144.4	-0.423861	-0.199365
144.5	-0.417516	-0.190647
144.6	-0.412009	-0.182637
144.7	-0.407653	-0.175422
144.8	-0.404731	-0.16903
144.9	-0.403486	-0.163396
145	-0.404078	-0.158421
145.1	-0.406564	-0.153942
145.2	-0.410894	-0.149774
145.3	-0.416913	-0.145651
145.4	-0.424391	-0.141272
145.5	-0.433042	-0.136316
145.6	-0.44247	-0.130467
145.7	-0.452236	-0.123426
145.8	-0.461845	-0.114962
145.9	-0.470788	-0.104904
146	-0.478586	-0.0931462
146.1	-0.484845	-0.0796599
146.2	-0.489202	-0.0645122
146.3	-0.491373	-0.0478691
146.4	-0.491189	-0.0299596
146.5	-0.488604	-0.0110683
146.6	-0.483687	0.00844534
146.7	-0.476601	0.0281444
146.8	-0.467591	0.0475646
146.9	-0.457	0.0662728
147	-0.445227	0.0838309
147.1	-0.432713	0.0998245
147.2	-0.419896	0.11389
147.3	-0.407189	0.125735
147.4	-0.39496	0.135151
147.5	-0.383497	0.14202
147.6	-0.372988	0.146342
147.7	-0.363547	0.148201
147.8	-0.355194	0.14778
147.9	-0.347837	0.145372
148	-0.341317	0.141333
148.1	-0.335406	0.136035
148.2	-0.329783	0.129899
148.3	-0.324105	0.123372
148.4	-0.318045	0.116867
148.5	-0.311261	0.110777
148.6	-0.30345	0.105456
148.7	-0.294407	0.10117
148.8	-0.283993	0.0980883
148.9	-0.272126	0.0962959
149	-0.258804	0.09576
149.1	-0.244132	0.0963908
149.2	-0.2283	0.0980688
149.3	-0.21155	0.100535
149.4	-0.194169	0.103465
149.5	-0.176476	0.10651
149.6	-0.158854	0.109335
149.7	-0.141717	0.111574
149.8	-0.1255	0.112897
149.9	-0.110635	0.112995
150	-0.097497	0.111612
150.1	-0.0864113	0.108547
150.2	-0.0776854	0.103668
150.3	-0.0715986	0.0969272
150.4	-0.0683719	0.0883227
150.5	-0.0681638	0.07792
150.6	-0.0710341	0.0658513
150.7	-0.0769217	0.0523153
150.8	-0.0856974	0.0375214
150.9	-0.0971829	0.0217038
151	-0.111107	0.00508984
151.1	-0.127103	-0.0120944
151.2	-0.144705	-0.0295905
151.3	-0.163398	-0.0471014
151.4	-0.182636	-0.064381
151.5	-0.20182	-0.0812477
151.6	-0.220307	-0.0975312
151.7	-0.2375	-0.113068
151.8	-0.252879	-0.127739
151.9	-0.265976	-0.141465
152	-0.276377	-0.154165
152.1	-0.283746	-0.165776
152.2	-0.287868	-0.176235
152.3	-0.288623	-0.185484
152.4	-0.285993	-0.193475
152.5	-0.280104	-0.200201
152.6	-0.271205	-0.205639
152.7	-0.259601	-0.209736
152.8	-0.245665	-0.212423
152.9	-0.229829	-0.213618
153	-0.212585	-0.213202
153.1	-0.194441	-0.211019
153.2	-0.175871	-0.206922
153.3	-0.157323	-0.200806
153.4	-0.139225	-0.192539
153.5	-0.121931	-0.181971
153.6	-0.105755	-0.168963
153.7	-0.09095	-0.153429
153.8	-0.0777038	-0.135333
153.9	-0.0661392	-0.114666
154	-0.0563313	-0.0914978
154.1	-0.0482987	-0.0659703
154.2	-0.042009	-0.0382866
154.3	-0.0373805	-0.00874797
154.4	-0.0342976	0.022245
154.5	-0.0326114	0.0542198
154.6	-0.0321832	0.0866404
154.7	-0.0328708	0.118975
154.8	-0.0344901	0.150646
154.9	-0.0368479	0.181058
155	-0.0397833	0.209632
155.1	-0.0431328	0.235801
155.2	-0.0467379	0.259116
155.3	-0.0504226	0.279204
155.4	-0.0540284	0.295789
155.5	-0.0574208	0.308689
155.6	-0.0604872	0.317854
155.7	-0.0631312	0.32334
155.8	-0.0652594	0.325306
155.9	-0.0667964	0.323991
156	-0.0676971	0.319743
156.1	-0.067961	0.313002
156.2	-0.0676261	0.30425
156.3	-0.0667532	0.293997
156.4	-0.0654444	0.282708
156.5	-0.063873	0.27082
156.6	-0.0622329	0.258721
156.7	-0.0607243	0.24677
156.8	-0.0595683	0.235249
156.9	-0.0590359	0.224355
157	-0.0594312	0.214213
157.1	-0.0610352	0.204826
157.2	-0.064119	0.1961
157.3	-0.0689536	0.187939
157.4	-0.0757689	0.180174
157.5	-0.084719	0.17257
157.6	-0.0959037	0.164861
157.7	-0.109381	0.156758
157.8	-0.125144	0.148007
157.9	-0.143083	0.138395
158	-0.163022	0.12772
158.1	-0.184712	0.115844
158.2	-0.20782	0.102705
158.3	-0.231927	0.0882951
158.4	-0.256583	0.0726543
158.5	-0.281331	0.0558868
158.6	-0.305667	0.0381657
158.7	-0.329116	0.0197368
158.8	-0.351224	0.000878414
158.9	-0.371589	-0.0180964
159	-0.38987	-0.0368766
159.1	-0.40579	-0.055149
159.2	-0.419147	-0.0726418
159.3	-0.429851	-0.089106
159.4	-0.437908	-0.104306
159.5	-0.443427	-0.118029
159.6	-0.446597	-0.130142
159.7	-0.447656	-0.140574
159.8	-0.446888	-0.149282
159.9	-0.444609	-0.156256
160	-0.441166	-0.161596
160.1	-0.436922	-0.165462
160.2	-0.432221	-0.168043
160.3	-0.427379	-0.169549
160.4	-0.422666	-0.170176
160.5	-0.418291	-0.170123
160.6	-0.414393	-0.169619
160.7	-0.411065	-0.168941
160.8	-0.40835	-0.168337
160.9	-0.406233	-0.168018
161	-0.404657	-0.168172
161.1	-0.403514	-0.168939
161.2	-0.402689	-0.170413
161.3	-0.402062	-0.17264
161.4	-0.401499	-0.175626
161.5	-0.400883	-0.179363
161.6	-0.400118	-0.1838
161.7	-0.399112	-0.18882
161.8	-0.397799	-0.194241
161.9	-0.396159	-0.199894
162	-0.394197	-0.205618
162.1	-0.391941	-0.211258
162.2	-0.389483	-0.216669
162.3	-0.386968	-0.221727
162.4	-0.384528	-0.226342
162.5	-0.382294	-0.23044
162.6	-0.380408	-0.234003
162.7	-0.379012	-0.237085
162.8	-0.378261	-0.239788
162.9	-0.378289	-0.242262
163	-0.379191	-0.244664
163.1	-0.381039	-0.247148
163.2	-0.383877	-0.249945
163.3	-0.38771	-0.253289
163.4	-0.392487	-0.257362
163.5	-0.398118	-0.262319
163.6	-0.40446	-0.268268
163.7	-0.411314	-0.275248
163.8	-0.418447	-0.283245
163.9	-0.425591	-0.292181
164	-0.432465	-0.301915
164.1	-0.438792	-0.312247
164.2	-0.444247	-0.322911
164.3	-0.448527	-0.333565
164.4	-0.451374	-0.343822
164.5	-0.45255	-0.353292
164.6	-0.451874	-0.361568
164.7	-0.449206	-0.368247
164.8	-0.444493	-0.372966
164.9	-0.437745	-0.375371
165	-0.429019	-0.375166
165.1	-0.418435	-0.372128
165.2	-0.406189	-0.366122
165.3	-0.392513	-0.357134
165.4	-0.377688	-0.345219
165.5	-0.362041	-0.330477
165.6	-0.34589	-0.313127
165.7	-0.329532	-0.293501
165.8	-0.31328	-0.272017
165.9	-0.297461	-0.249135
166	-0.282339	-0.225311
166.1	-0.268123	-0.201066
166.2	-0.254996	-0.176936
166.3	-0.243105	-0.153447
166.4	-0.232534	-0.131078
166.5	-0.223333	-0.110288
166.6	-0.215517	-0.0914692
166.7	-0.209044	-0.0749425
166.8	-0.203872	-0.0609411
166.9	-0.199929	-0.049642
167	-0.19713	-0.0411348
167.1	-0.195402	-0.0354084
167.2	-0.194658	-0.0323791
167.3	-0.194783	-0.0318898
167.4	-0.195654	-0.0337285
167.5	-0.197135	-0.0376362
167.6	-0.199097	-0.0432867
167.7	-0.201402	-0.0503182
167.8	-0.203922	-0.0583781
167.9	-0.206533	-0.0671248
168	-0.209091	-0.0761804
168.1	-0.211449	-0.0851812
168.2	-0.213486	-0.0938305
168.3	-0.215078	-0.10189
168.4	-0.21611	-0.1092
168.5	-0.216507	-0.115637
168.6	-0.216227	-0.121112
168.7	-0.215273	-0.125578
168.8	-0.21368	-0.129054
168.9	-0.211524	-0.131613
169	-0.20892	-0.133364
169.1	-0.206022	-0.134475
169.2	-0.203012	-0.135127
169.3	-0.20009	-0.135479
169.4	-0.197478	-0.135715
169.5	-0.19541	-0.136016
169.6	-0.194102	-0.136542
169.7	-0.193739	-0.137445
169.8	-0.194492	-0.138851
169.9	-0.196475	-0.140827
170	-0.199775	-0.143418
170.1	-0.204443	-0.146661
170.2	-0.210487	-0.150584
170.3	-0.217874	-0.155173
170.4	-0.226545	-0.160385
170.5	-0.236418	-0.166175
170.6	-0.247365	-0.172507
170.7	-0.259263	-0.179293
170.8	-0.271966	-0.186438
170.9	-0.2853	-0.19387
171	-0.299078	-0.201523
171.1	-0.313114	-0.209306
171.2	-0.327205	-0.217126
171.3	-0.341137	-0.224867
171.4	-0.354644	-0.232414
171.5	-0.367446	-0.23965
171.6	-0.379255	-0.246458
171.7	-0.389779	-0.252734
171.8	-0.398691	-0.258382
171.9	-0.405638	-0.263314
172	-0.410259	-0.267462
172.1	-0.412214	-0.270763
172.2	-0.411241	-0.273159
172.3	-0.407122	-0.274622
172.4	-0.399662	-0.275154
172.5	-0.388763	-0.274766
172.6	-0.374427	-0.273494
172.7	-0.356757	-0.271377
172.8	-0.335963	-0.268447
172.9	-0.312381	-0.264775
173	-0.286456	-0.260463
173.1	-0.258731	-0.255617
173.2	-0.229788	-0.250328
173.3	-0.200265	-0.244689
173.4	-0.170839	-0.23882
173.5	-0.142215	-0.232857
173.6	-0.115097	-0.226895
173.7	-0.0901277	-0.221017
173.8	-0.0678639	-0.215356
173.9	-0.0487815	-0.210028
174	-0.0332715	-0.205157
174.1	-0.0216138	-0.200838
174.2	-0.0139865	-0.197162
174.3	-0.0104654	-0.194164
174.4	-0.0110031	-0.191862
174.5	-0.0154092	-0.190244
174.6	-0.0234255	-0.189279
174.7	-0.0347295	-0.188928
174.8	-0.0488918	-0.189102
174.9	-0.0654179	-0.189683
175	-0.0837794	-0.190552
175.1	-0.103436	-0.191554
175.2	-0.12385	-0.192563
175.3	-0.144471	-0.193447
175.4	-0.164775	-0.194093
175.5	-0.184294	-0.194384
175.6	-0.202564	-0.194255
175.7	-0.219165	-0.193672
175.8	-0.233757	-0.192637
175.9	-0.246082	-0.191193
176	-0.255962	-0.189399
176.1	-0.263288	-0.18735
176.2	-0.268031	-0.185152
176.3	-0.270245	-0.182949
176.4	-0.270093	-0.180886
176.5	-0.267795	-0.1791
176.6	-0.263618	-0.177704
176.7	-0.257874	-0.176783
176.8	-0.25094	-0.176373
176.9	-0.243228	-0.176482
177	-0.235177	-0.177088
177.1	-0.227234	-0.178068
177.2	-0.21983	-0.179241
177.3	-0.213355	-0.180405
177.4	-0.208146	-0.18134
177.5	-0.204501	-0.181799
177.6	-0.202697	-0.181514
177.7	-0.202953	-0.180222
177.8	-0.205411	-0.17772
177.9	-0.210173	-0.173845
178	-0.217282	-0.168487
178.1	-0.226736	-0.161587
178.2	-0.238473	-0.153149
178.3	-0.252364	-0.143275
178.4	-0.268258	-0.132188
178.5	-0.285995	-0.12015
178.6	-0.305403	-0.107477
178.7	-0.326271	-0.0945224
178.8	-0.348375	-0.0816397
178.9	-0.371476	-0.0691823
179	-0.395344	-0.057516
179.1	-0.419743	-0.0469698
179.2	-0.444446	-0.0377726
179.3	-0.469247	-0.0300979
179.4	-0.493983	-0.024073
179.5	-0.518457	-0.0197448
179.6	-0.542493	-0.0170769
179.7	-0.56595	-0.0159578
179.8	-0.588728	-0.0162162
179.9	-0.610702	-0.0177035
180	-0.631763	-0.0202016
180.1	-0.651802	-0.0234999
180.2	-0.670713	-0.0273894
180.3	-0.688387	-0.0316733
180.4	-0.704733	-0.0361933
180.5	-0.719631	-0.0408658
180.6	-0.732952	-0.0456628
180.7	-0.744545	-0.0505976
180.8	-0.754226	-0.055705
180.9	-0.761776	-0.0610141
181	-0.76699	-0.0665564
181.1	-0.769689	-0.0723666
181.2	-0.769686	-0.0784587
181.3	-0.766822	-0.084845
181.4	-0.760983	-0.0914973
181.5	-0.7521	-0.09835
181.6	-0.740179	-0.105327
181.7	-0.725324	-0.112304
181.8	-0.707734	-0.119081
181.9	-0.687698	-0.125465
182	-0.665598	-0.131263
182.1	-0.641904	-0.136276
182.2	-0.617145	-0.14035
182.3	-0.591899	-0.143389
182.4	-0.566781	-0.145372
182.5	-0.542456	-0.146341
182.6	-0.519546	-0.146355
182.7	-0.498625	-0.14551
182.8	-0.480238	-0.144012
182.9	-0.464857	-0.142099
183	-0.452809	-0.140063
183.1	-0.4443	-0.138191
183.2	-0.439413	-0.136759
183.3	-0.43815	-0.136003
183.4	-0.440354	-0.136133
183.5	-0.445756	-0.137292
183.6	-0.454028	-0.139569
183.7	-0.46476	-0.142996
183.8	-0.477437	-0.147572
183.9	-0.491513	-0.15325
184	-0.506447	-0.159917
184.1	-0.521736	-0.167392
184.2	-0.536882	-0.175482
184.3	-0.551408	-0.183977
184.4	-0.564903	-0.192638
184.5	-0.577032	-0.20125
184.6	-0.587542	-0.209635
184.7	-0.59624	-0.217646
184.8	-0.602994	-0.225148
184.9	-0.607784	-0.232033
185	-0.610651	-0.23817
185.1	-0.611708	-0.243473
185.2	-0.611124	-0.247895
185.3	-0.609105	-0.251403
185.4	-0.605909	-0.253997
185.5	-0.601814	-0.255695
185.6	-0.597074	-0.256556
185.7	-0.591956	-0.25664
185.8	-0.586712	-0.256004
185.9	-0.581568	-0.254743
186	-0.576728	-0.252978
186.1	-0.572339	-0.250855
186.2	-0.5685	-0.248566
186.3	-0.56528	-0.246281
186.4	-0.562715	-0.24411
186.5	-0.560771	-0.242169
186.6	-0.559346	-0.240553
186.7	-0.558293	-0.239372
186.8	-0.557457	-0.238702
186.9	-0.556679	-0.238548
187	-0.555763	-0.23887
187.1	-0.554505	-0.239602
187.2	-0.552703	-0.240648
187.3	-0.550156	-0.24187
187.4	-0.546694	-0.243112
187.5	-0.542195	-0.244209
187.6	-0.536566	-0.244992
187.7	-0.52973	-0.245298
187.8	-0.52167	-0.244986
187.9	-0.512452	-0.243942
188	-0.502162	-0.242114
188.1	-0.490898	-0.239527
188.2	-0.478786	-0.236261
188.3	-0.46599	-0.232406
188.4	-0.452674	-0.228035
188.5	-0.43901	-0.223286
188.6	-0.425166	-0.218308
188.7	-0.411316	-0.213296
188.8	-0.397625	-0.208476
188.9	-0.384225	-0.204039
189	-0.371209	-0.200144
189.1	-0.358618	-0.196948
189.2	-0.34647	-0.194583
189.3	-0.334778	-0.19313
189.4	-0.323513	-0.192635
189.5	-0.312618	-0.193145
189.6	-0.301984	-0.194683
189.7	-0.291461	-0.197245
189.8	-0.280875	-0.200795
189.9	-0.270039	-0.205316
190	-0.258781	-0.21079
190.1	-0.246936	-0.217186
190.2	-0.234343	-0.224458
190.3	-0.220883	-0.232558
190.4	-0.206485	-0.241392
190.5	-0.19107	-0.250903
190.6	-0.174596	-0.261038
190.7	-0.1571	-0.271727
190.8	-0.13868	-0.282837
190.9	-0.119491	-0.294221
191	-0.0997674	-0.30571
191.1	-0.0798092	-0.317137
191.2	-0.0599294	-0.328334
191.3	-0.0404406	-0.339083
191.4	-0.0217069	-0.349171
191.5	-0.00410901	-0.35841
191.6	0.01202	-0.366618
191.7	0.0263924	-0.373619
191.8	0.0387473	-0.379247
191.9	0.0488828	-0.383347
192	0.0567173	-0.385852
192.1	0.0622488	-0.386744
192.2	0.065521	-0.386047
192.3	0.0666853	-0.383791
192.4	0.0659934	-0.380066
192.5	0.0637676	-0.375003
192.6	0.0603936	-0.36874
192.7	0.0562784	-0.361473
192.8	0.0518437	-0.353388
192.9	0.0475534	-0.344689
193	0.0438346	-0.335582
193.1	0.0410588	-0.326268
193.2	0.0395336	-0.316945
193.3	0.0394676	-0.307779
193.4	0.040981	-0.29888
193.5	0.0441075	-0.290322
193.6	0.0487788	-0.282141
193.7	0.0548428	-0.274359
193.8	0.0620425	-0.266943
193.9	0.0700204	-0.259807
194	0.0783875	-0.252829
194.1	0.0866954	-0.24586
194.2	0.0944705	-0.238746
194.3	0.10129	-0.231347
194.4	0.106772	-0.223563
194.5	0.11057	-0.21529
194.6	0.112382	-0.206451
194.7	0.111967	-0.196998
194.8	0.109197	-0.186951
194.9	0.104063	-0.176373
195	0.0966234	-0.165388
195.1	0.0870161	-0.154177
195.2	0.0754473	-0.142975
195.3	0.0622061	-0.132051
195.4	0.0476429	-0.121676
195.5	0.0321339	-0.112124
195.6	0.0160627	-0.103659
195.7	-0.000198874	-0.0965189
195.8	-0.0162623	-0.090917
195.9	-0.0317535	-0.0870265
196	-0.0463753	-0.0850166
196.1	-0.0599336	-0.0849384
196.2	-0.0722596	-0.0867623
196.3	-0.0832347	-0.0904378
196.4	-0.0928252	-0.0958819
196.5	-0.101097	-0.102922
196.6	-0.108173	-0.111347
196.7	-0.114205	-0.120915
196.8	-0.119395	-0.131349
196.9	-0.123992	-0.142365
197	-0.128243	-0.153674
197.1	-0.132383	-0.164952
197.2	-0.136644	-0.175907
197.3	-0.141223	-0.186288
197.4	-0.146267	-0.195859
197.5	-0.151886	-0.204361
197.6	-0.158167	-0.211568
197.7	-0.165154	-0.217316
197.8	-0.17282	-0.221502
197.9	-0.181108	-0.224054
198	-0.189916	-0.224935
198.1	-0.199158	-0.224146
198.2	-0.208761	-0.221718
198.3	-0.218649	-0.217716
198.4	-0.228743	-0.212211
198.5	-0.239018	-0.205289
198.6	-0.249491	-0.197061
198.7	-0.260191	-0.187633
198.8	-0.271166	-0.177128
198.9	-0.282481	-0.165675
199	-0.294217	-0.153395
199.1	-0.306468	-0.140426
199.2	-0.31931	-0.126908
199.3	-0.332828	-0.112989
199.4	-0.347049	-0.0988211
199.5	-0.361931	-0.0845794
199.6	-0.377396	-0.070454
199.7	-0.393324	-0.056683
[truncated: 5,003 more rows]

## Sheet: 16922013-14.abf
	current (pA)
Time (ms)	30 uM 5-HT	100 uM cocaine
0	0.280074	-0.323555
0.100098	0.293011	-0.32294
0.200195	0.308079	-0.319801
0.299805	0.324864	-0.314149
0.399902	0.342942	-0.306097
0.5	0.361868	-0.295801
0.600098	0.381173	-0.283535
0.700195	0.400466	-0.269582
0.799805	0.419409	-0.25427
0.899902	0.437703	-0.237899
1	0.455123	-0.220758
1.1001	0.47148	-0.203109
1.2002	0.486672	-0.185146
1.2998	0.500681	-0.167017
1.3999	0.513514	-0.148809
1.5	0.525288	-0.130544
1.6001	0.536078	-0.112163
1.7002	0.546002	-0.0935913
1.7998	0.555159	-0.0746609
1.8999	0.56366	-0.0552059
2	0.571627	-0.0350414
2.1001	0.579133	-0.0139442
2.2002	0.586264	0.00821914
2.2998	0.59297	0.0315517
2.3999	0.599209	0.0560459
2.5	0.604939	0.0816502
2.6001	0.61011	0.108176
2.7002	0.614672	0.135376
2.7998	0.618538	0.16285
2.8999	0.621602	0.190157
3	0.623803	0.216732
3.1001	0.625058	0.242028
3.2002	0.625344	0.265423
3.2998	0.624634	0.286322
3.3999	0.622935	0.304083
3.5	0.620333	0.31815
3.6001	0.616915	0.328053
3.7002	0.61279	0.333409
3.7998	0.608075	0.333987
3.8999	0.602879	0.329657
4	0.597342	0.320483
4.1001	0.591605	0.306603
4.2002	0.585833	0.288334
4.2998	0.580176	0.266146
4.3999	0.574721	0.240582
4.5	0.569542	0.212277
4.6001	0.564683	0.181904
4.7002	0.560174	0.150208
4.7998	0.556075	0.117899
4.8999	0.552399	0.0857376
5	0.549166	0.0543884
5.1001	0.546364	0.0245098
5.2002	0.544015	-0.00328217
5.2998	0.54214	-0.0284649
5.3999	0.54074	-0.0505997
5.5	0.539853	-0.0693317
5.6001	0.539517	-0.0843712
5.7002	0.539733	-0.0955025
5.7998	0.540509	-0.10259
5.8999	0.541802	-0.105527
6	0.543606	-0.104364
6.1001	0.545888	-0.0991207
6.2002	0.548577	-0.0899826
6.2998	0.5516	-0.0770927
6.3999	0.554806	-0.0607029
6.5	0.558022	-0.041143
6.6001	0.561001	-0.01885
6.7002	0.563492	0.0057682
6.7998	0.565247	0.0322288
6.8999	0.565957	0.0600246
7	0.565384	0.0886101
7.1001	0.563258	0.117421
7.2002	0.559323	0.145909
7.2998	0.553416	0.173533
7.3999	0.545329	0.199789
7.5	0.534909	0.22424
7.6001	0.522101	0.246472
7.7002	0.506926	0.266152
7.7998	0.489472	0.283081
7.8999	0.469906	0.297074
8	0.448441	0.308073
8.1001	0.425328	0.316067
8.2002	0.400969	0.321116
8.2998	0.375767	0.323342
8.3999	0.350195	0.322951
8.5	0.324669	0.320137
8.6001	0.299628	0.315117
8.7002	0.275487	0.308115
8.7998	0.25265	0.299336
8.8999	0.231501	0.289015
9	0.212336	0.277323
9.1001	0.195366	0.264422
9.2002	0.180712	0.250409
9.2998	0.168429	0.235373
9.3999	0.158469	0.219403
9.5	0.150712	0.202574
9.6001	0.144976	0.184929
9.7002	0.141024	0.166506
9.7998	0.138568	0.147318
9.8999	0.137282	0.127392
10	0.136834	0.106787
10.1001	0.136866	0.0855564
10.2002	0.137084	0.0637821
10.2998	0.137234	0.0415844
10.3999	0.137127	0.0190968
10.5	0.136647	-0.00355683
10.6001	0.135691	-0.0261875
10.7002	0.134242	-0.0486466
10.7998	0.132392	-0.0707565
10.8999	0.130261	-0.0923325
11	0.128018	-0.113178
11.1001	0.125865	-0.133058
11.2002	0.124043	-0.151788
11.2998	0.122773	-0.169155
11.3999	0.122288	-0.184925
11.5	0.122731	-0.198928
11.6001	0.12424	-0.210975
11.7002	0.126879	-0.22085
11.7998	0.130675	-0.228345
11.8999	0.135541	-0.233268
12	0.141293	-0.235431
12.1001	0.147673	-0.234647
12.2002	0.154358	-0.230728
12.2998	0.160948	-0.223533
12.3999	0.167128	-0.212911
12.5	0.172478	-0.198732
12.6001	0.17657	-0.180912
12.7002	0.178984	-0.15941
12.7998	0.179335	-0.13426
12.8999	0.177317	-0.105556
13	0.172728	-0.0734612
13.1001	0.165474	-0.0382668
13.2002	0.155579	-0.000342946
13.2998	0.143206	0.0398487
13.3999	0.128602	0.0817589
13.5	0.11216	0.124728
13.6001	0.0943781	0.168
13.7002	0.0758348	0.210778
13.7998	0.0572057	0.252203
13.8999	0.039248	0.291378
14	0.0226598	0.327446
14.1001	0.00819641	0.359555
14.2002	-0.0034613	0.386979
14.2998	-0.0116743	0.409035
14.3999	-0.0158972	0.425204
14.5	-0.0157065	0.435088
14.6001	-0.0108027	0.438488
14.7002	-0.00106758	0.435372
14.7998	0.0135198	0.425894
14.8999	0.032805	0.410368
15	0.0565	0.389279
15.1001	0.0841356	0.363274
15.2002	0.115199	0.333077
15.2998	0.149048	0.299519
15.3999	0.185004	0.263478
15.5	0.222304	0.225878
15.6001	0.260169	0.187621
15.7002	0.297719	0.149571
15.7998	0.334139	0.112507
15.8999	0.368622	0.0771507
16	0.400414	0.044043
16.1001	0.428795	0.013615
16.2002	0.45308	-0.0138107
16.2998	0.472661	-0.0380779
16.3999	0.486987	-0.0591618
16.5	0.49561	-0.0771633
16.6001	0.498215	-0.0922943
16.7002	0.494586	-0.104843
16.7998	0.484557	-0.1152
16.8999	0.468175	-0.123821
17	0.44559	-0.131189
17.1001	0.417107	-0.137802
17.2002	0.383149	-0.144149
17.2998	0.344298	-0.150671
17.3999	0.301243	-0.157821
17.5	0.254832	-0.165956
17.6001	0.205996	-0.175363
17.7002	0.155726	-0.186246
17.7998	0.10508	-0.198738
17.8999	0.0550962	-0.212865
18	0.00685554	-0.228576
18.1001	-0.0386366	-0.245763
18.2002	-0.08048	-0.264225
18.2998	-0.117826	-0.283725
18.3999	-0.149963	-0.303974
18.5	-0.17628	-0.324659
18.6001	-0.196372	-0.345388
18.7002	-0.209979	-0.365787
18.7998	-0.216989	-0.385465
18.8999	-0.217411	-0.404079
19	-0.211486	-0.421365
19.1001	-0.199518	-0.437028
19.2002	-0.181962	-0.450857
19.2998	-0.159334	-0.462671
19.3999	-0.132245	-0.472297
19.5	-0.101367	-0.479675
19.6001	-0.0673823	-0.484731
19.7002	-0.0310225	-0.487463
19.7998	0.00703293	-0.487909
19.8999	0.0461431	-0.48611
20	0.0856863	-0.482084
20.1001	0.125119	-0.475912
20.2002	0.16397	-0.467628
20.2998	0.201842	-0.457262
20.3999	0.238387	-0.444837
20.5	0.2734	-0.430338
20.6001	0.306731	-0.413744
20.7002	0.338349	-0.395053
20.7998	0.368308	-0.374204
20.8999	0.396674	-0.351131
21	0.423588	-0.325752
21.1001	0.44921	-0.298013
21.2002	0.473754	-0.267906
21.2998	0.497433	-0.23542
21.3999	0.520529	-0.200584
21.5	0.543259	-0.163482
21.6001	0.565812	-0.12426
21.7002	0.58836	-0.0831371
21.7998	0.611025	-0.0403439
21.8999	0.633835	0.00379981
22	0.656825	0.048941
22.1001	0.67993	0.0946182
22.2002	0.70304	0.140379
22.2998	0.725937	0.185751
22.3999	0.748372	0.230263
22.5	0.770014	0.273446
22.6001	0.790457	0.314846
22.7002	0.809271	0.354046
22.7998	0.825959	0.3907
22.8999	0.83997	0.424555
23	0.850794	0.455449
23.1001	0.857909	0.483307
23.2002	0.860831	0.508147
23.2998	0.859086	0.530074
23.3999	0.852305	0.549254
23.5	0.840167	0.56597
23.6001	0.822512	0.580561
23.7002	0.799281	0.59335
23.7998	0.770531	0.604727
23.8999	0.736481	0.615069
24	0.697466	0.62473
24.1001	0.654027	0.63402
24.2002	0.606782	0.643135
24.2998	0.556473	0.652239
24.3999	0.503895	0.661377
24.5	0.449942	0.670517
24.6001	0.395543	0.679497
24.7002	0.34158	0.688069
24.7998	0.288947	0.695877
24.8999	0.238463	0.702525
25	0.190888	0.707581
25.1001	0.146851	0.71056
25.2002	0.106873	0.711016
25.2998	0.0713049	0.708504
25.3999	0.0403429	0.702673
25.5	0.0140253	0.693259
25.6001	-0.00774902	0.680079
25.7002	-0.0251975	0.663115
25.7998	-0.0386004	0.642474
25.8999	-0.0484099	0.618372
26	-0.0551333	0.591193
26.1001	-0.0593352	0.561407
26.2002	-0.061582	0.529627
26.2998	-0.0624632	0.496483
26.3999	-0.0625681	0.462647
26.5	-0.0623812	0.428816
26.6001	-0.062324	0.395659
26.7002	-0.0627188	0.363749
26.7998	-0.0638213	0.333607
26.8999	-0.0658106	0.305634
27	-0.0687022	0.280093
27.1001	-0.0724673	0.257119
27.2002	-0.0770201	0.236695
27.2998	-0.0821795	0.218676
27.3999	-0.0877356	0.202799
27.5	-0.0933947	0.188708
27.6001	-0.0988631	0.176011
27.7002	-0.103839	0.164231
27.7998	-0.108093	0.152882
27.8999	-0.111394	0.141463
28	-0.113557	0.129532
28.1001	-0.114482	0.1167
28.2002	-0.114078	0.102646
28.2998	-0.112346	0.0871128
28.3999	-0.109317	0.0699448
28.5	-0.105064	0.0510525
28.6001	-0.0996889	0.0304512
28.7002	-0.0932745	0.00824394
28.7998	-0.0859293	-0.0154396
28.8999	-0.0777277	-0.0404011
29	-0.0687403	-0.0664211
29.1001	-0.0590033	-0.0932404
29.2002	-0.0485053	-0.120584
29.2998	-0.0372176	-0.148222
29.3999	-0.0250639	-0.175903
29.5	-0.0119185	-0.203441
29.6001	0.0023275	-0.230623
29.7002	0.0178114	-0.257286
29.7998	0.0346342	-0.283304
29.8999	0.0529428	-0.308588
30	0.0727392	-0.333068
30.1001	0.0940138	-0.356704
30.2002	0.116684	-0.379465
30.2998	0.140618	-0.401329
30.3999	0.165627	-0.422289
30.5	0.191418	-0.442291
30.6001	0.217679	-0.461269
30.7002	0.244057	-0.479171
30.7998	0.270201	-0.495956
30.8999	0.295741	-0.511537
31	0.320313	-0.525835
31.1001	0.343632	-0.538755
31.2002	0.365384	-0.550216
31.2998	0.385348	-0.560123
31.3999	0.403397	-0.568386
31.5	0.419467	-0.574951
31.6001	0.433571	-0.579795
31.7002	0.445801	-0.582855
31.7998	0.456318	-0.584118
31.8999	0.465321	-0.583587
32	0.473042	-0.581251
32.1001	0.479716	-0.577121
32.2002	0.485644	-0.571218
32.2998	0.491057	-0.563556
32.3999	0.496178	-0.554151
32.5	0.501187	-0.54297
32.6001	0.506182	-0.529993
32.7002	0.51125	-0.515159
32.7998	0.516419	-0.498432
32.8999	0.521683	-0.479763
33	0.526984	-0.459146
33.1001	0.532204	-0.43655
33.2002	0.537196	-0.411981
33.2998	0.541796	-0.385482
33.3999	0.545893	-0.357118
33.5	0.549321	-0.327003
33.6001	0.551917	-0.29524
33.7002	0.553536	-0.262016
33.7998	0.554062	-0.227605
33.8999	0.553391	-0.192245
34	0.551446	-0.156225
34.1001	0.548201	-0.11988
34.2002	0.543625	-0.0835434
34.2998	0.537663	-0.0475498
34.3999	0.530329	-0.0122582
34.5	0.521605	0.0220016
34.6001	0.5115	0.0548805
34.7002	0.500086	0.0860981
34.7998	0.487393	0.11542
34.8999	0.473506	0.142668
35	0.458525	0.1677
35.1001	0.442559	0.19043
35.2002	0.425822	0.210858
35.2998	0.408505	0.229023
35.3999	0.390856	0.24503
35.5	0.37316	0.25906
35.6001	0.355704	0.271332
35.7002	0.338811	0.282174
35.7998	0.3228	0.291909
35.8999	0.307961	0.300942
36	0.294562	0.309622
36.1001	0.28283	0.318398
36.2002	0.27294	0.327647
36.2998	0.264962	0.337748
36.3999	0.258921	0.349053
36.5	0.254763	0.361836
36.6001	0.252343	0.376299
36.7002	0.251435	0.39262
36.7998	0.251767	0.410849
36.8999	0.253018	0.430968
37	0.25488	0.45287
37.1001	0.257025	0.476374
37.2002	0.259152	0.501244
37.2998	0.260954	0.52714
37.3999	0.262269	0.553666
37.5	0.262993	0.580368
37.6001	0.26314	0.606778
37.7002	0.262793	0.632447
37.7998	0.262068	0.656886
37.8999	0.261202	0.679688
38	0.260447	0.700459
38.1001	0.260127	0.718905
38.2002	0.260567	0.73478
38.2998	0.262055	0.747927
38.3999	0.264859	0.758238
38.5	0.269179	0.765725
38.6001	0.275117	0.770466
38.7002	0.28271	0.772602
38.7998	0.291859	0.772347
38.8999	0.302352	0.769926
39	0.313923	0.765604
39.1001	0.326235	0.759655
39.2002	0.338858	0.752344
39.2998	0.351344	0.743843
39.3999	0.363221	0.734354
39.5	0.373982	0.724003
39.6001	0.383191	0.712895
39.7002	0.390414	0.70102
39.7998	0.395264	0.688364
39.8999	0.397505	0.674839
40	0.396897	0.660342
40.1001	0.393313	0.644749
40.2002	0.386719	0.627938
40.2998	0.377123	0.60982
40.3999	0.36468	0.590285
40.5	0.349503	0.569268
40.6001	0.33182	0.54669
40.7002	0.311823	0.52252
40.7998	0.289767	0.496819
40.8999	0.265872	0.469645
41	0.240386	0.441113
41.1001	0.213545	0.411299
41.2002	0.18562	0.380343
41.2998	0.156855	0.348359
41.3999	0.12748	0.315464
41.5	0.0976892	0.281794
41.6001	0.0676981	0.247475
41.7002	0.0377527	0.212618
41.7998	0.00804191	0.177319
41.8999	-0.0211691	0.141646
42	-0.0496668	0.105679
42.1001	-0.0772147	0.0695042
42.2002	-0.103513	0.0332169
42.2998	-0.128305	-0.0030571
42.3999	-0.15138	-0.0391403
42.5	-0.172555	-0.0748783
42.6001	-0.191711	-0.110056
42.7002	-0.208715	-0.144415
42.7998	-0.223478	-0.177683
42.8999	-0.235973	-0.209547
43	-0.246284	-0.239761
43.1001	-0.254535	-0.268001
43.2002	-0.260877	-0.293996
43.2998	-0.265487	-0.317443
43.3999	-0.268537	-0.338094
43.5	-0.270273	-0.355793
43.6001	-0.270904	-0.370409
43.7002	-0.270717	-0.381916
43.7998	-0.269893	-0.390302
43.8999	-0.268611	-0.39561
44	-0.266996	-0.397977
44.1001	-0.265178	-0.397571
44.2002	-0.263256	-0.394624
44.2998	-0.26132	-0.389385
44.3999	-0.259448	-0.382145
44.5	-0.257747	-0.373203
44.6001	-0.256284	-0.362878
44.7002	-0.255165	-0.35149
44.7998	-0.254548	-0.339315
44.8999	-0.254571	-0.326635
45	-0.25542	-0.313694
45.1001	-0.257322	-0.300666
45.2002	-0.260503	-0.287723
45.2998	-0.265209	-0.274904
45.3999	-0.271703	-0.262218
45.5	-0.280216	-0.249647
45.6001	-0.290903	-0.237081
45.7002	-0.303899	-0.224384
45.7998	-0.319295	-0.211309
45.8999	-0.337087	-0.19761
46	-0.357221	-0.183015
46.1001	-0.379539	-0.167284
46.2002	-0.403833	-0.150165
46.2998	-0.429828	-0.13141
46.3999	-0.457191	-0.110839
46.5	-0.485521	-0.0883842
46.6001	-0.514381	-0.0640217
46.7002	-0.54327	-0.0378738
46.7998	-0.571657	-0.010141
46.8999	-0.599035	0.0188602
47	-0.624885	0.0487026
47.1001	-0.648687	0.0789131
47.2002	-0.669942	0.108958
47.2998	-0.688154	0.138241
47.3999	-0.70285	0.166144
47.5	-0.713624	0.192011
47.6001	-0.720077	0.215275
47.7002	-0.721872	0.235419
47.7998	-0.718675	0.251984
47.8999	-0.71025	0.264639
48	-0.69643	0.273163
48.1001	-0.677061	0.277447
48.2002	-0.652093	0.277518
48.2998	-0.62158	0.273482
48.3999	-0.585638	0.265566
48.5	-0.544536	0.254143
48.6001	-0.498584	0.239666
48.7002	-0.448236	0.222668
48.7998	-0.394008	0.203713
48.8999	-0.33654	0.183377
49	-0.276519	0.162339
49.1001	-0.21474	0.141196
49.2002	-0.152111	0.12057
49.2998	-0.0895457	0.100989
49.3999	-0.0279574	0.082972
49.5	0.0317312	0.0669159
49.6001	0.0886598	0.0531429
49.7002	0.141957	0.0418571
49.7998	0.190886	0.0331787
49.8999	0.23477	0.0270847
50	0.273093	0.0234684
50.1001	0.305451	0.0220703
50.2002	0.331561	0.0225586
50.2998	0.351296	0.024464
50.3999	0.364756	0.0273136
50.5	0.372159	0.0305904
50.6001	0.373824	0.0337109
50.7002	0.37016	0.0361179
50.7998	0.361678	0.0372528
50.8999	0.348958	0.0366672
51	0.332696	0.0339436
51.1001	0.313592	0.0288071
51.2002	0.29233	0.0210079
51.2998	0.269591	0.010405
51.3999	0.245987	-0.00296174
51.5	0.222149	-0.0189529
51.6001	0.198653	-0.0373398
51.7002	0.176005	-0.0577885
51.7998	0.154643	-0.0798946
51.8999	0.134888	-0.103159
52	0.116944	-0.127098
52.1001	0.100962	-0.151106
52.2002	0.0869985	-0.174602
52.2998	0.0750318	-0.196994
52.3999	0.0649629	-0.217767
52.5	0.056645	-0.23644
52.6001	0.0498014	-0.252609
52.7002	0.0441461	-0.265956
52.7998	0.0393587	-0.276277
52.8999	0.0350881	-0.283455
53	0.0309911	-0.287462
53.1001	0.0267339	-0.288391
53.2002	0.0220209	-0.286459
53.2998	0.0165678	-0.28195
53.3999	0.010182	-0.275228
53.5	0.00265175	-0.266723
53.6001	-0.00618309	-0.256902
53.7002	-0.0163874	-0.246261
53.7998	-0.027944	-0.235281
53.8999	-0.0408701	-0.224437
54	-0.055118	-0.214128
54.1001	-0.0706229	-0.204736
54.2002	-0.0872988	-0.196581
54.2998	-0.105022	-0.189903
54.3999	-0.123687	-0.18482
54.5	-0.14319	-0.181394
54.6001	-0.163406	-0.179588
54.7002	-0.184257	-0.179323
54.7998	-0.20557	-0.180484
54.8999	-0.22723	-0.182874
55	-0.249114	-0.186262
55.1001	-0.271095	-0.190446
55.2002	-0.292993	-0.195194
55.2998	-0.314607	-0.200275
55.3999	-0.335752	-0.205488
55.5	-0.356208	-0.210638
55.6001	-0.375808	-0.215646
55.7002	-0.394325	-0.220438
55.7998	-0.4116	-0.224996
55.8999	-0.427461	-0.229326
56	-0.441768	-0.233476
56.1001	-0.454372	-0.237545
56.2002	-0.465154	-0.241659
56.2998	-0.47397	-0.245935
56.3999	-0.480653	-0.25049
56.5	-0.485074	-0.255407
56.6001	-0.487096	-0.260769
56.7002	-0.486621	-0.266605
56.7998	-0.483526	-0.27292
56.8999	-0.477674	-0.279676
57	-0.468923	-0.286827
57.1001	-0.457151	-0.294313
57.2002	-0.442224	-0.302019
57.2998	-0.424066	-0.309841
57.3999	-0.402671	-0.317665
57.5	-0.378107	-0.325397
57.6001	-0.350484	-0.333006
57.7002	-0.320009	-0.340461
57.7998	-0.286941	-0.347818
57.8999	-0.251663	-0.35518
58	-0.214597	-0.362711
58.1001	-0.176273	-0.370559
58.2002	-0.137203	-0.378887
58.2998	-0.0980009	-0.387926
58.3999	-0.0592875	-0.397842
58.5	-0.0215945	-0.408809
58.6001	0.0145898	-0.420906
58.7002	0.0488268	-0.434152
58.7998	0.0807691	-0.448452
58.8999	0.110121	-0.463613
59	0.13671	-0.479322
59.1001	0.160433	-0.495151
59.2002	0.181334	-0.510585
59.2998	0.199544	-0.525001
59.3999	0.215212	-0.537719
59.5	0.228562	-0.548015
59.6001	0.239842	-0.555135
59.7002	0.249312	-0.558351
59.7998	0.257248	-0.557006
59.8999	0.263865	-0.550552
60	0.269364	-0.538555
60.1001	0.273861	-0.520765
60.2002	0.277409	-0.497068
60.2998	0.280053	-0.467577
60.3999	0.281746	-0.43251
60.5	0.282446	-0.392286
60.6001	0.282046	-0.347482
60.7002	0.280425	-0.298776
60.7998	0.277468	-0.24699
60.8999	0.273081	-0.193018
61	0.267237	-0.137796
61.1001	0.259881	-0.0822216
61.2002	0.251082	-0.0271736
61.2998	0.240933	0.0265144
61.3999	0.22959	0.0781273
61.5	0.217278	0.126995
61.6001	0.204238	0.172638
61.7002	0.190764	0.214659
61.7998	0.177172	0.252852
61.8999	0.163804	0.287098
62	0.150956	0.317414
62.1001	0.138915	0.343924
62.2002	0.127923	0.366816
62.2998	0.118203	0.386387
62.3999	0.109923	0.402932
62.5	0.103137	0.416846
62.6001	0.0978399	0.42854
62.7002	0.093989	0.438446
62.7998	0.0914636	0.447026
62.8999	0.0900884	0.454676
63	0.0896688	0.461781
63.1001	0.0899416	0.468682
63.2002	0.0905386	0.475686
63.2998	0.091065	0.483027
63.3999	0.0911871	0.490929
63.5	0.0905347	0.49956
63.6001	0.0887437	0.509014
63.7002	0.0854746	0.519335
63.7998	0.0804239	0.530503
63.8999	0.0733381	0.542397
64	0.0640207	0.554871
64.1001	0.0523305	0.567717
64.2002	0.0381876	0.580668
64.2998	0.021525	0.593451
64.3999	0.00246101	0.605727
64.5	-0.0188517	0.61715
64.6001	-0.0421233	0.627373
64.7002	-0.0670313	0.636071
64.7998	-0.0931715	0.642952
64.8999	-0.120143	0.647801
65	-0.147489	0.650458
65.1001	-0.174732	0.65082
65.2002	-0.201375	0.648846
65.2998	-0.226955	0.644585
65.3999	-0.250997	0.638157
65.5	-0.273088	0.629774
65.6001	-0.292886	0.619685
65.7002	-0.31014	0.60822
65.7998	-0.324586	0.595736
65.8999	-0.336099	0.58259
66	-0.344598	0.569142
66.1001	-0.350076	0.555714
66.2002	-0.352628	0.542622
66.2998	-0.352395	0.530156
66.3999	-0.349616	0.51853
66.5	-0.344625	0.507859
66.6001	-0.337806	0.498228
66.7002	-0.329532	0.489636
66.7998	-0.320245	0.482033
66.8999	-0.310434	0.475325
67	-0.300628	0.469319
67.1001	-0.29129	0.463835
67.2002	-0.282888	0.458668
67.2998	-0.275852	0.453593
67.3999	-0.270515	0.44837
67.5	-0.267127	0.442759
67.6001	-0.265855	0.436549
67.7002	-0.266771	0.42952
67.7998	-0.269813	0.421509
67.8999	-0.274806	0.412331
68	-0.281429	0.401867
68.1001	-0.289279	0.389983
68.2002	-0.297845	0.376566
68.2998	-0.306566	0.361552
68.3999	-0.314857	0.344857
68.5	-0.32212	0.32647
68.6001	-0.327768	0.30637
68.7002	-0.331262	0.28455
68.7998	-0.332149	0.261073
68.8999	-0.330038	0.236039
69	-0.324615	0.209582
69.1001	-0.315664	0.181876
69.2002	-0.303167	0.153164
69.2998	-0.287145	0.123738
69.3999	-0.267732	0.0939335
69.5	-0.245195	0.0641159
69.6001	-0.219818	0.0346779
69.7002	-0.191965	0.00601615
69.7998	-0.16209	-0.0214478
69.8999	-0.130674	-0.0473152
70	-0.0981821	-0.0712124
70.1001	-0.0651049	-0.092775
70.2002	-0.0319476	-0.111719
70.2998	0.000725325	-0.127807
70.3999	0.0323949	-0.140865
70.5	0.0625463	-0.150812
70.6001	0.0907255	-0.157676
70.7002	0.116431	-0.161569
70.7998	0.139197	-0.16263
70.8999	0.158652	-0.161108
71	0.174454	-0.157283
71.1001	0.186362	-0.15146
71.2002	0.194218	-0.143983
71.2998	0.197949	-0.135225
71.3999	0.197562	-0.125517
71.5	0.19312	-0.115175
71.6001	0.184857	-0.104423
71.7002	0.173087	-0.0934273
71.7998	0.158219	-0.0823399
71.8999	0.1407	-0.0711914
72	0.121073	-0.0600239
72.1001	0.0999303	-0.0487381
72.2002	0.0779253	-0.0372139
72.2998	0.055657	-0.0253025
72.3999	0.0337072	-0.0128151
72.5	0.0126482	0.000416178
72.6001	-0.00707382	0.0145821
72.7002	-0.0249819	0.0298447
72.7998	-0.0407423	0.046328
72.8999	-0.0540575	0.0641121
73	-0.0647597	0.0832581
73.1001	-0.0727419	0.103728
73.2002	-0.0780501	0.12547
73.2998	-0.0808081	0.148369
73.3999	-0.0812182	0.172297
73.5	-0.0795378	0.197052
73.6001	-0.0761141	0.222392
73.7002	-0.0713534	0.248053
73.7998	-0.0657	0.273716
73.8999	-0.059585	0.299071
74	-0.0534434	0.323798
74.1001	-0.0476946	0.347504
74.2002	-0.0426974	0.369801
74.2998	-0.0387892	0.39032
74.3999	-0.0361742	0.408682
74.5	-0.0349707	0.424521
74.6001	-0.0352282	0.437483
74.7002	-0.0369162	0.447174
74.7998	-0.0398497	0.453259
74.8999	-0.0437254	0.455479
75	-0.0481963	0.453667
75.1001	-0.0528693	0.447682
75.2002	-0.0573153	0.437477
75.2998	-0.0611052	0.423087
75.3999	-0.0638461	0.404686
75.5	-0.065164	0.382483
75.6001	-0.0647387	0.356844
75.7002	-0.0623259	0.328225
75.7998	-0.057815	0.297163
75.8999	-0.051166	0.264233
76	-0.0424361	0.230067
76.1001	-0.0317473	0.195332
76.2002	-0.0193991	0.160717
76.2998	-0.00573486	0.126831
76.3999	0.00887352	0.0942997
76.5	0.0240045	0.0636734
76.6001	0.0392175	0.0354713
76.7002	0.054133	0.0101398
76.7998	0.0683771	-0.0119778
76.8999	0.0815969	-0.0306164
77	0.0934835	-0.0456253
77.1001	0.103858	-0.0569397
77.2002	0.112578	-0.0645805
77.2998	0.119584	-0.0686279
77.3999	0.124884	-0.0692154
77.5	0.128581	-0.0664974
77.6001	0.130839	-0.0607105
77.7002	0.131836	-0.0520893
77.7998	0.131793	-0.0408741
77.8999	0.130955	-0.0273262
78	0.129511	-0.0117203
78.1001	0.127648	0.00569
78.2002	0.125556	0.024691
78.2998	0.123391	0.0450825
78.3999	0.121193	0.0666565
78.5	0.118891	0.0892624
78.6001	0.116419	0.112746
78.7002	0.113627	0.137007
78.7998	0.110293	0.161925
78.8999	0.106122	0.187357
79	0.100724	0.213181
79.1001	0.0937544	0.239285
79.2002	0.0848261	0.265528
79.2998	0.0735899	0.291842
79.3999	0.0597406	0.31807
79.5	0.0430265	0.344098
79.6001	0.0232492	0.369748
79.7002	0.000267562	0.394934
79.7998	-0.0259299	0.419537
79.8999	-0.055242	0.443507
80	-0.0875029	0.466786
80.1001	-0.122375	0.489344
80.2002	-0.15944	0.511172
80.2998	-0.19816	0.532271
80.3999	-0.23793	0.55275
80.5	-0.278055	0.572691
80.6001	-0.317766	0.592181
80.7002	-0.356267	0.611294
80.7998	-0.392757	0.630137
80.8999	-0.42642	0.648777
81	-0.456487	0.667284
81.1001	-0.482189	0.68565
81.2002	-0.50287	0.703862
81.2998	-0.517944	0.72185
81.3999	-0.526946	0.739497
81.5	-0.529561	0.756688
81.6001	-0.525611	0.773228
81.7002	-0.515037	0.788952
81.7998	-0.497943	0.803624
81.8999	-0.474595	0.817028
82	-0.445383	0.828972
82.1001	-0.410856	0.839297
82.2002	-0.37165	0.847866
82.2998	-0.328508	0.854546
82.3999	-0.282255	0.859251
82.5	-0.233779	0.861973
82.6001	-0.183988	0.86274
82.7002	-0.133823	0.861668
82.7998	-0.0842089	0.858895
82.8999	-0.0360712	0.854615
83	0.00976425	0.84903
83.1001	0.0525175	0.842438
83.2002	0.0915056	0.835114
83.2998	0.126105	0.827408
83.3999	0.155846	0.819638
83.5	0.180356	0.812138
83.6001	0.1994	0.805235
83.7002	0.212903	0.799235
83.7998	0.220904	0.794436
83.8999	0.22363	0.791123
84	0.221409	0.789553
84.1001	0.214715	0.789912
84.2002	0.204175	0.792324
84.2998	0.190545	0.796896
84.3999	0.174658	0.803677
84.5	0.157391	0.812621
84.6001	0.139683	0.823609
84.7002	0.12241	0.836493
84.7998	0.106444	0.851046
84.8999	0.0925756	0.867024
85	0.0815321	0.884186
85.1001	0.0738912	0.902199
85.2002	0.0700956	0.920765
85.2998	0.0704618	0.939518
85.3999	0.07507	0.958145
85.5	0.083819	0.976363
85.6001	0.0964246	0.993918
85.7002	0.112534	1.01062
85.7998	0.131598	1.02637
85.8999	0.153008	1.04112
86	0.176051	1.05482
86.1001	0.199986	1.06751
86.2002	0.224059	1.07926
86.2998	0.247576	1.09022
86.3999	0.269919	1.10051
86.5	0.290576	1.11031
86.6001	0.309104	1.11972
86.7002	0.325184	1.12882
86.7998	0.338694	1.13765
86.8999	0.349604	1.14622
87	0.357991	1.15444
87.1001	0.364052	1.16213
87.2002	0.368056	1.16907
87.2998	0.370362	1.17489
87.3999	0.371325	1.1792
87.5	0.371342	1.18157
87.6001	0.37081	1.18153
87.7002	0.370093	1.17855
87.7998	0.369477	1.17217
87.8999	0.369193	1.16188
88	0.369376	1.14729
88.1001	0.370097	1.12805
88.2002	0.371337	1.10393
88.2998	0.373049	1.07481
88.3999	0.375109	1.04068
88.5	0.377369	1.0017
88.6001	0.379651	0.958187
88.7002	0.381774	0.910626
88.7998	0.383555	0.859669
88.8999	0.384812	0.806071
89	0.385401	0.750716
89.1001	0.385203	0.694561
89.2002	0.38416	0.638642
89.2998	0.382281	0.584027
89.3999	0.379574	0.531767
89.5	0.376134	0.482848
89.6001	0.372077	0.438197
89.7002	0.367545	0.39861
89.7998	0.362687	0.364708
89.8999	0.357649	0.336914
90	0.352656	0.315417
90.1001	0.347966	0.300206
90.2002	0.343817	0.29105
90.2998	0.340405	0.287589
90.3999	0.337927	0.289175
90.5	0.336567	0.295046
90.6001	0.336505	0.304228
90.7002	0.337874	0.315693
90.7998	0.340787	0.328366
90.8999	0.345341	0.3412
91	0.351479	0.353207
91.1001	0.359158	0.363484
91.2002	0.368271	0.371273
91.2998	0.378695	0.375939
91.3999	0.390212	0.377072
91.5	0.402545	0.37447
91.6001	0.415343	0.368086
91.7002	0.428233	0.358061
91.7998	0.440806	0.34474
91.8999	0.452611	0.3286
92	0.463223	0.310229
92.1001	0.472233	0.290284
92.2002	0.479241	0.269465
92.2998	0.483906	0.248497
92.3999	0.485928	0.228072
92.5	0.485104	0.208874
92.6001	0.481316	0.191494
92.7002	0.474581	0.176443
92.7998	0.465016	0.164107
92.8999	0.452845	0.15474
93	0.438393	0.14851
93.1001	0.422068	0.145516
93.2002	0.40437	0.145716
93.2998	0.385808	0.148991
93.3999	0.366948	0.155096
93.5	0.348427	0.163718
93.6001	0.330817	0.174445
93.7002	0.314629	0.186833
93.7998	0.300288	0.200365
93.8999	0.288167	0.214558
94	0.278529	0.228873
94.1001	0.271521	0.242779
94.2002	0.267138	0.255742
94.2998	0.265267	0.267237
94.3999	0.26561	0.276858
94.5	0.267802	0.284237
94.6001	0.271395	0.289116
94.7002	0.275879	0.291319
94.7998	0.280673	0.290772
94.8999	0.285195	0.28752
95	0.288884	0.281678
95.1001	0.291218	0.27348
95.2002	0.29176	0.263277
95.2998	0.290148	0.251498
95.3999	0.286213	0.238585
95.5	0.27983	0.225045
95.6001	0.271079	0.211415
95.7002	0.260106	0.198182
95.7998	0.247273	0.185828
95.8999	0.233023	0.174746
96	0.217867	0.165265
96.1001	0.202426	0.157635
96.2002	0.18734	0.152037
96.2998	0.173297	0.148602
96.3999	0.160922	0.147339
96.5	0.150765	0.148198
96.6001	0.143311	0.151057
96.7002	0.138979	0.155743
96.7998	0.138049	0.162028
96.8999	0.140667	0.169667
97	0.146819	0.178414
97.1001	0.156355	0.188054
97.2002	0.169022	0.198344
97.2998	0.184399	0.209036
97.3999	0.201985	0.219914
97.5	0.221259	0.230772
97.6001	0.241602	0.241438
97.7002	0.262394	0.251751
97.7998	0.283015	0.261582
97.8999	0.302926	0.270792
98	0.321587	0.279274
98.1001	0.338564	0.286919
98.2002	0.353533	0.293602
98.2998	0.366303	0.299239
98.3999	0.376784	0.303723
98.5	0.38501	0.306998
98.6001	0.391116	0.309012
98.7002	0.395373	0.309704
98.7998	0.398097	0.309058
98.8999	0.39971	0.307022
99	0.400746	0.303593
99.1001	0.401681	0.298804
99.2002	0.403044	0.29266
99.2998	0.405297	0.285208
99.3999	0.408871	0.27652
99.5	0.414166	0.26669
99.6001	0.421502	0.255804
99.7002	0.431126	0.24399
99.7998	0.443142	0.231333
99.8999	0.457583	0.217936
100	0.474368	0.203921
100.1	0.493359	0.189421
100.2	0.514252	0.174561
100.3	0.536694	0.159418
100.4	0.560217	0.144095
100.5	0.584385	0.128661
100.6	0.608664	0.113217
100.7	0.632552	0.0978798
100.8	0.655482	0.0827984
100.9	0.67694	0.0680508
101	0.696442	0.0537437
101.1	0.713574	0.0399784
101.2	0.727923	0.0268845
101.3	0.739178	0.014624
101.4	0.747107	0.00329246
101.5	0.7515	-0.0070015
101.6	0.752242	-0.0161778
101.7	0.74935	-0.0241657
101.8	0.742884	-0.0309292
101.9	0.732945	-0.0364471
102	0.719698	-0.0406586
102.1	0.703373	-0.0435101
102.2	0.684279	-0.0449844
102.3	0.662768	-0.0450417
102.4	0.639239	-0.0436493
102.5	0.614165	-0.0407349
102.6	0.587985	-0.0362316
102.7	0.561156	-0.0299965
102.8	0.534154	-0.0219208
102.9	0.507453	-0.0118652
103	0.481497	0.000337977
103.1	0.456736	0.0148548
103.2	0.433535	0.0318493
103.3	0.412194	0.0514378
103.4	0.392949	0.0737099
103.5	0.375948	0.0986904
103.6	0.361258	0.126353
103.7	0.348889	0.156567
103.8	0.3387	0.189146
103.9	0.330468	0.223824
104	0.32387	0.260252
104.1	0.318509	0.29801
104.2	0.313967	0.336607
104.3	0.309746	0.375473
104.4	0.30538	0.414008
104.5	0.300398	0.451596
104.6	0.294371	0.487606
104.7	0.286906	0.521399
104.8	0.277739	0.552365
104.9	0.266648	0.579905
105	0.253607	0.603499
105.1	0.238617	0.62262
105.2	0.221896	0.636887
105.3	0.203717	0.645972
105.4	0.18447	0.649674
105.5	0.164654	0.647824
105.6	0.144791	0.64033
105.7	0.125495	0.627238
105.8	0.107327	0.608664
105.9	0.0908628	0.584891
106	0.0766225	0.556216
106.1	0.0650716	0.523062
106.2	0.0565916	0.485892
106.3	0.0514532	0.445256
106.4	0.0498014	0.401764
106.5	0.0516706	0.356034
106.6	0.0569578	0.30876
106.7	0.0655256	0.260624
106.8	0.0771242	0.212353
106.9	0.0914903	0.164633
107	0.108309	0.118168
107.1	0.127286	0.0736565
107.2	0.148108	0.0317329
107.3	0.170502	-0.00699387
107.4	0.194243	-0.0420242
107.5	0.219107	-0.0728928
107.6	0.244958	-0.099239
107.7	0.271702	-0.120786
107.8	0.299307	-0.137336
107.9	0.327731	-0.148815
108	0.356921	-0.15525
108.1	0.386862	-0.156795
108.2	0.417466	-0.153703
108.3	0.448617	-0.146291
108.4	0.480139	-0.134994
108.5	0.511797	-0.120254
108.6	0.543248	-0.102609
108.7	0.574074	-0.0826126
108.8	0.603833	-0.0608326
108.9	0.632056	-0.0378033
109	0.658166	-0.0140301
109.1	0.681635	0.00999679
109.2	0.701951	0.0339092
109.3	0.718619	0.0573811
109.4	0.731236	0.0801357
109.5	0.739472	0.101981
109.6	0.743126	0.122818
109.7	0.74206	0.142588
109.8	0.736281	0.161272
109.9	0.725951	0.178894
110	0.711352	0.195464
110.1	0.692858	0.211043
110.2	0.670954	0.225706
110.3	0.646205	0.239529
110.4	0.619212	0.252514
110.5	0.590613	0.264679
110.6	0.561036	0.276019
110.7	0.531115	0.286478
110.8	0.501454	0.295998
110.9	0.472571	0.304474
111	0.44492	0.3118
111.1	0.418856	0.317822
111.2	0.394648	0.322447
111.3	0.372489	0.325592
111.4	0.352492	0.327177
111.5	0.334685	0.327132
111.6	0.319069	0.3254
111.7	0.305558	0.322003
111.8	0.294039	0.317015
111.9	0.28444	0.310545
112	0.276608	0.302777
112.1	0.270436	0.293936
112.2	0.265835	0.284312
112.3	0.262719	0.274252
112.4	0.261069	0.264138
112.5	0.260821	0.254345
112.6	0.262003	0.245276
112.7	0.26458	0.237318
112.8	0.268586	0.230791
112.9	0.273999	0.225962
113	0.280793	0.223069
113.1	0.288886	0.222247
113.2	0.298163	0.223553
113.3	0.308512	0.226914
113.4	0.319741	0.232188
113.5	0.331584	0.239144
113.6	0.343798	0.247485
113.7	0.356076	0.256878
113.8	0.368109	0.266924
113.9	0.379572	0.277203
114	0.390175	0.287342
114.1	0.399632	0.296973
114.2	0.407742	0.305764
114.3	0.414347	0.313427
114.4	0.419371	0.319764
114.5	0.422818	0.324644
114.6	0.42478	0.328005
114.7	0.425364	0.329848
114.8	0.424796	0.330269
114.9	0.423298	0.329386
115	0.421139	0.327338
115.1	0.418614	0.324242
115.2	0.41597	0.320275
115.3	0.413449	0.315617
115.4	0.411233	0.310364
115.5	0.409504	0.304627
115.6	0.40831	0.298432
115.7	0.407685	0.291768
115.8	0.407582	0.28459
115.9	0.407975	0.27682
116	0.408749	0.268334
116.1	0.40981	0.259043
116.2	0.411078	0.248824
116.3	0.412518	0.237576
116.4	0.414107	0.225171
116.5	0.415837	0.211563
116.6	0.41783	0.196759
116.7	0.420247	0.18083
116.8	0.423256	0.163905
116.9	0.427043	0.146185
117	0.431809	0.12797
117.1	0.437728	0.109599
117.2	0.444943	0.0914253
117.3	0.453539	0.0739044
117.4	0.463502	0.0575489
117.5	0.474719	0.0428451
117.6	0.487013	0.0303005
117.7	0.500096	0.0203995
117.8	0.513596	0.0135426
117.9	0.527066	0.0100788
118	0.540011	0.0102905
118.1	0.551905	0.0143341
118.2	0.562232	0.0222744
118.3	0.570509	0.034058
118.4	0.57631	0.0495228
118.5	0.579312	0.0683865
118.6	0.579318	0.0902885
118.7	0.576224	0.114769
118.8	0.570008	0.14127
118.9	0.560784	0.169182
119	0.548762	0.197888
119.1	0.534268	0.226704
119.2	0.517678	0.25498
119.3	0.499428	0.282074
119.4	0.479947	0.307396
119.5	0.459645	0.330397
119.6	0.43891	0.350588
119.7	0.418099	0.367535
119.8	0.397479	0.380879
119.9	0.377282	0.390349
120	0.357653	0.395745
120.1	0.338673	0.396984
120.2	0.320311	0.393988
120.3	0.30255	0.38678
120.4	0.285302	0.375492
120.5	0.268494	0.360327
120.6	0.25202	0.341521
120.7	0.235795	0.319397
120.8	0.219758	0.294375
120.9	0.203888	0.266896
121	0.188229	0.237471
121.1	0.172831	0.206662
121.2	0.157782	0.175068
121.3	0.143187	0.143313
121.4	0.129229	0.112008
121.5	0.116105	0.0817818
121.6	0.103993	0.0532936
121.7	0.093062	0.0271152
121.8	0.0834947	0.00379028
121.9	0.0754572	-0.0161701
122	0.0690637	-0.0323254
122.1	0.0644994	-0.0442978
122.2	0.0618215	-0.0518108
122.3	0.0610948	-0.0546585
122.4	0.0623422	-0.0527302
122.5	0.0655237	-0.0460602
122.6	0.070561	-0.0347591
122.7	0.077395	-0.0189968
122.8	0.0858789	0.000959773
122.9	0.0958601	0.0247196
123	0.107144	0.0518536
123.1	0.119492	0.0818256
123.2	0.132659	0.114085
123.3	0.146372	0.148074
123.4	0.160317	0.183201
123.5	0.17422	0.218892
123.6	0.187781	0.25458
123.7	0.200631	0.289704
123.8	0.212485	0.323803
123.9	0.223017	0.356438
124	0.231947	0.387288
124.1	0.239043	0.416069
124.2	0.244107	0.442616
124.3	0.247027	0.466809
124.4	0.247649	0.488604
124.5	0.245907	0.508032
124.6	0.241738	0.525124
124.7	0.235173	0.540005
124.8	0.226285	0.552803
124.9	0.215228	0.563666
125	0.202153	0.572699
125.1	0.187302	0.580025
125.2	0.170884	0.585684
125.3	0.153105	0.589701
125.4	0.134259	0.592074
125.5	0.114659	0.592797
125.6	0.0945917	0.591822
125.7	0.0743452	0.589108
125.8	0.0541826	0.584599
125.9	0.0343671	0.578247
126	0.0151239	0.570013
126.1	-0.00326485	0.559851
126.2	-0.020574	0.54777
126.3	-0.0366206	0.533825
126.4	-0.0512213	0.518111
126.5	-0.0642523	0.50071
126.6	-0.0755972	0.481743
126.7	-0.0851626	0.461436
126.8	-0.0928892	0.439972
126.9	-0.0987582	0.417576
127	-0.102804	0.394436
127.1	-0.105106	0.370734
127.2	-0.105752	0.346661
127.3	-0.104873	0.322394
127.4	-0.102579	0.298092
127.5	-0.0990271	0.273875
127.6	-0.0943999	0.249792
127.7	-0.0888895	0.225916
127.8	-0.082662	0.202298
127.9	-0.0758929	0.178929
128	-0.0687231	0.155762
128.1	-0.0612902	0.132758
128.2	-0.0537371	0.109875
128.3	-0.0461478	0.0870308
128.4	-0.0386233	0.0641293
128.5	-0.0312552	0.0410732
128.6	-0.0241465	0.0177711
128.7	-0.0173678	-0.00586281
128.8	-0.010982	-0.0298859
128.9	-0.00508637	-0.0543877
129	0.000193175	-0.079393
129.1	0.004767	-0.104957
129.2	0.00850349	-0.131054
129.3	0.0112291	-0.157636
129.4	0.0128465	-0.184648
129.5	0.0132223	-0.211977
129.6	0.0122285	-0.239465
129.7	0.00977569	-0.266924
129.8	0.00579124	-0.294159
129.9	0.000187453	-0.320932
130	-0.00701279	-0.346969
130.1	-0.0158324	-0.372041
130.2	-0.0261778	-0.395855
130.3	-0.0379595	-0.418151
130.4	-0.0510401	-0.438678
130.5	-0.0652079	-0.457203
130.6	-0.0802588	-0.473531
130.7	-0.0959658	-0.487541
130.8	-0.112079	-0.499141
130.9	-0.128311	-0.508272
131	-0.144363	-0.514906
131.1	-0.159967	-0.51906
131.2	-0.174819	-0.520807
131.3	-0.188636	-0.52025
131.4	-0.201152	-0.517507
131.5	-0.212142	-0.512748
131.6	-0.221353	-0.506195
131.7	-0.228576	-0.498043
131.8	-0.233697	-0.48851
131.9	-0.236612	-0.477836
132	-0.237262	-0.466253
132.1	-0.23566	-0.453985
132.2	-0.231845	-0.441278
132.3	-0.225952	-0.428327
132.4	-0.218181	-0.415382
132.5	-0.20873	-0.402628
132.6	-0.197887	-0.390304
132.7	-0.185945	-0.378595
132.8	-0.173271	-0.367708
132.9	-0.160242	-0.357772
133	-0.147262	-0.34897
133.1	-0.134727	-0.341432
133.2	-0.122997	-0.335306
133.3	-0.112371	-0.330696
133.4	-0.103176	-0.327745
133.5	-0.0956797	-0.326595
133.6	-0.0901083	-0.327352
133.7	-0.086574	-0.330106
133.8	-0.0850977	-0.334882
133.9	-0.0856146	-0.341695
134	-0.0880579	-0.350584
134.1	-0.0922408	-0.361551
134.2	-0.0979609	-0.374548
134.3	-0.104835	-0.389532
134.4	-0.112535	-0.406417
134.5	-0.120656	-0.425064
134.6	-0.128841	-0.445285
134.7	-0.136682	-0.466871
134.8	-0.143852	-0.489608
134.9	-0.149999	-0.513197
135	-0.154863	-0.537368
135.1	-0.158229	-0.561779
135.2	-0.160064	-0.586105
135.3	-0.16031	-0.610056
135.4	-0.159025	-0.633276
135.5	-0.156272	-0.655483
135.6	-0.1522	-0.676368
135.7	-0.146995	-0.695688
135.8	-0.140882	-0.713228
135.9	-0.134101	-0.72874
136	-0.126859	-0.742033
136.1	-0.119274	-0.752933
136.2	-0.111495	-0.761335
136.3	-0.103609	-0.767166
136.4	-0.0956568	-0.770315
136.5	-0.0876288	-0.770715
136.6	-0.0794806	-0.768285
136.7	-0.0711855	-0.762962
136.8	-0.0626482	-0.754686
136.9	-0.0537733	-0.743393
137	-0.0445036	-0.729032
137.1	-0.0347704	-0.711561
137.2	-0.024549	-0.690948
137.3	-0.0138506	-0.667192
137.4	-0.00275559	-0.6403
137.5	0.00862175	-0.610336
137.6	0.0201784	-0.577406
137.7	0.0317579	-0.541666
137.8	0.0431886	-0.503301
137.9	0.0543218	-0.46256
138	0.0650087	-0.419744
138.1	0.0751176	-0.3752
138.2	0.0845552	-0.329252
138.3	0.0932642	-0.282268
138.4	0.101227	-0.234577
138.5	0.10846	-0.186504
138.6	0.115065	-0.138313
138.7	0.121138	-0.0902401
138.8	0.126866	-0.0424191
138.9	0.132422	0.00505294
139	0.13803	0.0521988
139.1	0.143897	0.0990528
139.2	0.150214	0.145684
139.3	0.157183	0.192221
139.4	0.164984	0.238861
139.5	0.173785	0.285828
139.6	0.183682	0.3333
139.7	0.194771	0.3814
139.8	0.207074	0.430148
139.9	0.220566	0.47955
140	0.235209	0.529486
140.1	0.250903	0.579752
140.2	0.267516	0.630061
140.3	0.284903	0.680004
140.4	0.302899	0.729128
140.5	0.321282	0.776884
140.6	0.339816	0.822747
140.7	0.358243	0.866095
140.8	0.376357	0.906348
140.9	0.393874	0.942923
141	0.410523	0.975336
141.1	0.426055	1.00313
141.2	0.440213	1.02596
141.3	0.452731	1.04358
141.4	0.463389	1.05583
141.5	0.472012	1.06272
141.6	0.47843	1.06433
141.7	0.482522	1.06087
141.8	0.4842	1.05263
141.9	0.483412	1.04
142	0.480223	1.02347
142.1	0.47474	1.00354
142.2	0.467127	0.980753
142.3	0.457589	0.95566
142.4	0.4464	0.928812
142.5	0.433856	0.900725
142.6	0.420334	0.871851
142.7	0.40621	0.842623
142.8	0.391816	0.813353
142.9	0.377484	0.784378
143	0.363516	0.755928
143.1	0.350194	0.728222
143.2	0.337739	0.701458
143.3	0.326312	0.675785
143.4	0.315936	0.651358
143.5	0.306563	0.628277
143.6	0.298119	0.606617
143.7	0.290457	0.58648
143.8	0.283404	0.567938
143.9	0.276784	0.551054
144	0.270402	0.535891
144.1	0.264063	0.522492
144.2	0.257634	0.510882
144.3	0.250968	0.50103
144.4	0.244029	0.492896
144.5	0.236783	0.486342
144.6	0.229285	0.481205
144.7	0.221648	0.477248
144.8	0.214024	0.474268
144.9	0.206589	0.471997
145	0.199517	0.470236
145.1	0.193007	0.468747
145.2	0.187228	0.467339
145.3	0.182347	0.465823
145.4	0.178488	0.464096
145.5	0.17573	0.462109
145.6	0.174079	0.459875
145.7	0.173512	0.457489
145.8	0.173928	0.455107
145.9	0.175185	0.452895
146	0.17709	0.451067
146.1	0.17945	0.449824
146.2	0.182038	0.449355
146.3	0.184605	0.44986
146.4	0.1869	0.451432
146.5	0.188677	0.454098
146.6	0.189694	0.457808
146.7	0.189745	0.462452
146.8	0.188618	0.467802
146.9	0.186146	0.473584
147	0.182242	0.479416
147.1	0.176825	0.484961
147.2	0.169882	0.489813
147.3	0.161412	0.493588
147.4	0.151408	0.495913
147.5	0.139971	0.496413
147.6	0.127236	0.494877
147.7	0.113408	0.491135
147.8	0.0987249	0.485176
147.9	0.0834566	0.47704
148	0.0678869	0.466889
148.1	0.0523859	0.454987
148.2	0.0372911	0.441691
148.3	0.0229784	0.427418
148.4	0.00980049	0.412592
148.5	-0.00192207	0.397673
148.6	-0.011867	0.383095
148.7	-0.0197577	0.369282
148.8	-0.0253596	0.356619
148.9	-0.0284552	0.345387
149	-0.028871	0.335759
149.1	-0.0265345	0.327853
149.2	-0.0214285	0.321688
149.3	-0.0135645	0.317204
149.4	-0.00302071	0.314267
149.5	0.0100866	0.312687
149.6	0.0256544	0.312249
149.7	0.0435472	0.312706
149.8	0.0636068	0.313845
149.9	0.085629	0.315472
150	0.109427	0.317446
150.1	0.134808	0.319666
150.2	0.161563	0.322112
150.3	0.189484	0.324793
150.4	0.218329	0.327807
150.5	0.247832	0.33125
150.6	0.277705	0.335286
150.7	0.307637	0.340075
150.8	0.337269	0.345747
150.9	0.366234	0.352404
151	0.394063	0.36006
151.1	0.420281	0.368693
151.2	0.444354	0.378197
151.3	0.465787	0.388363
151.4	0.484099	0.398961
151.5	0.498816	0.409649
151.6	0.509478	0.420056
151.7	0.515685	0.429743
151.8	0.517058	0.43821
151.9	0.513358	0.444989
152	0.504384	0.449593
152.1	0.49009	0.451567
152.2	0.470513	0.450503
152.3	0.44586	0.446032
152.4	0.416461	0.437857
152.5	0.382702	0.425803
152.6	0.345042	0.409766
152.7	0.304009	0.389742
152.8	0.260266	0.365801
152.9	0.214537	0.338108
153	0.167584	0.306904
153.1	0.120181	0.272532
153.2	0.0730825	0.235402
153.3	0.027041	0.19602
153.4	-0.0172343	0.154921
153.5	-0.0590567	0.112736
153.6	-0.0978217	0.0701202
153.7	-0.132959	0.027737
153.8	-0.16401	-0.0137688
153.9	-0.190595	-0.0537334
154	-0.212394	-0.0914989
154.1	-0.229156	-0.126474
154.2	-0.240755	-0.158104
154.3	-0.247142	-0.185897
154.4	-0.248357	-0.209461
154.5	-0.244514	-0.228475
154.6	-0.235856	-0.242738
154.7	-0.222635	-0.252206
154.8	-0.205219	-0.256956
154.9	-0.184026	-0.257171
155	-0.15954	-0.253164
155.1	-0.132314	-0.245365
155.2	-0.10283	-0.234268
155.3	-0.0716891	-0.220457
155.4	-0.0394091	-0.20454
155.5	-0.00654167	-0.187168
155.6	0.0263925	-0.169033
155.7	0.0588861	-0.150797
155.8	0.0905195	-0.133026
155.9	0.120886	-0.11622
156	0.149714	-0.100771
156.1	0.176693	-0.0869213
156.2	0.201666	-0.0748631
156.3	0.22453	-0.0646072
156.4	0.245293	-0.056028
156.5	0.263974	-0.0489002
156.6	0.280648	-0.0429283
156.7	0.295416	-0.0377365
156.8	0.308453	-0.0328728
156.9	0.319928	-0.0279099
157	0.330046	-0.022369
157.1	0.339003	-0.0158154
157.2	0.34694	-0.00789033
157.3	0.354018	0.00168647
157.4	0.360331	0.0131096
157.5	0.365971	0.0264076
157.6	0.371014	0.0415996
157.7	0.375506	0.0585503
157.8	0.379487	0.0770515
157.9	0.383032	0.0968365
158	0.386145	0.117577
158.1	0.388838	0.138966
158.2	0.391137	0.160683
158.3	0.393103	0.182467
158.4	0.394852	0.204119
158.5	0.396498	0.225487
158.6	0.398137	0.246531
158.7	0.399872	0.267313
158.8	0.401837	0.287974
158.9	0.404082	0.308737
159	0.406678	0.329901
159.1	0.409667	0.351786
159.2	0.413027	0.374791
159.3	0.416699	0.399289
159.4	0.420563	0.425665
159.5	0.424433	0.454247
159.6	0.428099	0.48526
159.7	0.431328	0.51891
159.8	0.433863	0.555241
159.9	0.435393	0.594216
160	0.435669	0.635647
160.1	0.434395	0.679201
160.2	0.431325	0.724436
160.3	0.426249	0.770804
160.4	0.419016	0.817644
160.5	0.409524	0.864275
160.6	0.397755	0.909911
160.7	0.383751	0.953732
160.8	0.36751	0.994889
160.9	0.349169	1.03251
161	0.328881	1.06586
161.1	0.306845	1.09419
161.2	0.283318	1.11693
161.3	0.258551	1.13356
161.4	0.232775	1.14375
161.5	0.206261	1.14729
161.6	0.179259	1.14416
161.7	0.152051	1.1345
161.8	0.124877	1.11866
161.9	0.097981	1.09714
162	0.0715109	1.07049
162.1	0.04563	1.03945
162.2	0.0204969	1.00487
162.3	-0.00379891	0.967587
162.4	-0.0271849	0.928536
162.5	-0.049581	0.888613
162.6	-0.0709719	0.848692
162.7	-0.0913195	0.809592
162.8	-0.110614	0.772049
162.9	-0.128889	0.736693
163	-0.146129	0.704052
163.1	-0.162347	0.674551
163.2	-0.177507	0.648453
163.3	-0.191541	0.625901
163.4	-0.204305	0.606963
163.5	-0.215682	0.591593
163.6	-0.225528	0.579705
163.7	-0.233634	0.571104
163.8	-0.239824	0.565474
163.9	-0.243843	0.562464
164	-0.245471	0.561652
164.1	-0.244478	0.562573
164.2	-0.240709	0.564768
164.3	-0.234058	0.567738
164.4	-0.224529	0.570977
164.5	-0.212203	0.573996
164.6	-0.197193	0.576336
164.7	-0.179687	0.57754
164.8	-0.159982	0.57717
164.9	-0.138503	0.574889
165	-0.115734	0.570399
165.1	-0.0921969	0.563494
165.2	-0.0684351	0.554102
165.3	-0.0450129	0.542225
165.4	-0.0224375	0.527998
165.5	-0.00124687	0.511687
165.6	0.0181261	0.493624
165.7	0.035378	0.47427
165.8	0.0502706	0.454113
165.9	0.0627103	0.433756
166	0.0726972	0.413832
166.1	0.08038	0.394972
166.2	0.0860029	0.377783
166.3	0.0899053	0.362814
166.4	0.0924879	0.350603
166.5	0.0942579	0.341624
166.6	0.0957418	0.336266
166.7	0.097508	0.334826
166.8	0.100075	0.337523
166.9	0.103945	0.34446
167	0.109501	0.355603
167.1	0.117074	0.370852
167.2	0.126868	0.390002
167.3	0.138966	0.412756
167.4	0.153372	0.438757
167.5	0.169919	0.4676
167.6	0.188342	0.49882
167.7	0.208304	0.531895
167.8	0.229327	0.566271
167.9	0.250929	0.601359
168	0.272547	0.63658
168.1	0.293603	0.671391
168.2	0.313601	0.705252
168.3	0.332018	0.737645
168.4	0.348479	0.768103
168.5	0.362629	0.796149
168.6	0.37426	0.82145
168.7	0.383244	0.843684
168.8	0.38959	0.862627
168.9	0.393406	0.878081
169	0.394915	0.889912
169.1	0.394362	0.898049
169.2	0.392092	0.90243
169.3	0.388506	0.903027
169.4	0.384049	0.899882
169.5	0.379094	0.893076
169.6	0.37399	0.882689
169.7	0.36905	0.868805
169.8	0.364535	0.851534
169.9	0.360663	0.831013
170	0.357585	0.80741
170.1	0.355382	0.780903
170.2	0.354088	0.751685
170.3	0.353682	0.719988
170.4	0.354067	0.686133
170.5	0.355155	0.650465
170.6	0.356776	0.613366
170.7	0.358811	0.57523
170.8	0.361126	0.536494
170.9	0.363593	0.497588
171	0.366067	0.458966
171.1	0.368409	0.421032
171.2	0.370457	0.384194
171.3	0.372023	0.348801
171.4	0.372866	0.315144
171.5	0.372798	0.283463
171.6	0.371623	0.25388
171.7	0.369141	0.22646
171.8	0.365162	0.20121
171.9	0.359469	0.178088
172	0.351901	0.156977
172.1	0.342286	0.137715
172.2	0.330521	0.120093
172.3	0.316611	0.103909
172.4	0.300578	0.0889153
172.5	0.282578	0.0749153
172.6	0.262759	0.061705
172.7	0.241364	0.0491089
172.8	0.218699	0.0370163
172.9	0.195134	0.0253548
173	0.17109	0.0140919
173.1	0.147023	0.00322952
173.2	0.123328	-0.00721894
173.3	0.100386	-0.0171886
173.4	0.0785204	-0.0266014
173.5	0.0579744	-0.0354
173.6	0.0389467	-0.0435768
173.7	0.0215116	-0.0510441
173.8	0.00568825	-0.0577808
173.9	-0.0086245	-0.0638081
174	-0.021604	-0.0692001
174.1	-0.0335383	-0.074062
174.2	-0.0447821	-0.0785271
174.3	-0.0557627	-0.0827652
174.4	-0.066852	-0.0869576
174.5	-0.0784182	-0.0913673
174.6	-0.0908217	-0.0962349
174.7	-0.104377	-0.101783
174.8	-0.119327	-0.108228
174.9	-0.135793	-0.115749
175	-0.153797	-0.124494
175.1	-0.17329	-0.134557
175.2	-0.194118	-0.146032
175.3	-0.215953	-0.158928
175.4	-0.238435	-0.173156
175.5	-0.261102	-0.188614
175.6	-0.283416	-0.205141
175.7	-0.304855	-0.222515
175.8	-0.324861	-0.240469
175.9	-0.342895	-0.258705
176	-0.358438	-0.276905
176.1	-0.371051	-0.294757
176.2	-0.38039	-0.311931
176.3	-0.386163	-0.328092
176.4	-0.388147	-0.342889
176.5	-0.38627	-0.35601
176.6	-0.380521	-0.367117
176.7	-0.370992	-0.375887
176.8	-0.357896	-0.381984
176.9	-0.34152	-0.385141
177	-0.322214	-0.385065
177.1	-0.300407	-0.381567
177.2	-0.276538	-0.374485
177.3	-0.251104	-0.363676
177.4	-0.224601	-0.34913
177.5	-0.197515	-0.330894
177.6	-0.170331	-0.309055
177.7	-0.143568	-0.28376
177.8	-0.117656	-0.255306
177.9	-0.0930113	-0.224067
178	-0.0699877	-0.190479
178.1	-0.0489249	-0.15508
178.2	-0.0301012	-0.118465
178.3	-0.0136866	-0.0812717
178.4	0.000172194	-0.0441433
178.5	0.0114675	-0.00773964
178.6	0.0201517	0.0273041
178.7	0.0262609	0.0604233
178.8	0.0298582	0.0911068
178.9	0.031056	0.118994
179	0.0300317	0.143788
179.1	0.0269971	0.16535
179.2	0.0221601	0.183663
179.3	0.0157838	0.198851
179.4	0.00813919	0.211163
179.5	-0.00056595	0.220955
179.6	-0.0100951	0.228703
179.7	-0.0202212	0.234949
179.8	-0.0306734	0.240288
179.9	-0.0412344	0.245352
180	-0.0516962	0.25075
180.1	-0.0618357	0.257056
180.2	-0.0714716	0.264828
180.3	-0.0804304	0.274517
180.4	-0.0886149	0.286482
180.5	-0.0959372	0.300991
180.6	-0.102334	0.318192
180.7	-0.107782	0.338086
180.8	-0.112302	0.360585
180.9	-0.115999	0.385443
181	-0.119041	0.412348
181.1	-0.121652	0.440922
181.2	-0.124074	0.470688
181.3	-0.126613	0.501168
181.4	-0.129613	0.531832
181.5	-0.133403	0.562189
181.6	-0.138311	0.591698
181.7	-0.144559	0.619851
181.8	-0.152391	0.64618
181.9	-0.161945	0.670319
182	-0.173292	0.692
182.1	-0.18634	0.711003
182.2	-0.200906	0.727154
182.3	-0.216711	0.740359
182.4	-0.233394	0.750634
182.5	-0.250514	0.758036
182.6	-0.267539	0.76272
182.7	-0.283891	0.764857
182.8	-0.299013	0.764708
182.9	-0.312335	0.762539
183	-0.323305	0.758671
183.1	-0.331453	0.753395
183.2	-0.336381	0.747033
183.3	-0.33781	0.739882
183.4	-0.335563	0.732226
183.5	-0.32957	0.724358
183.6	-0.319879	0.716515
183.7	-0.306619	0.708887
183.8	-0.290002	0.701666
183.9	-0.270366	0.694989
184	-0.248111	0.688944
184.1	-0.223682	0.683596
184.2	-0.197555	0.678994
184.3	-0.170211	0.675104
184.4	-0.142168	0.671872
184.5	-0.11391	0.669203
184.6	-0.0858912	0.666994
184.7	-0.058597	0.665141
184.8	-0.032432	0.663498
184.9	-0.00780243	0.661959
185	0.0149484	0.660401
185.1	0.0355478	0.658768
185.2	0.0537191	0.657002
185.3	0.0692545	0.655051
185.4	0.0819955	0.652943
185.5	0.0918222	0.650675
185.6	0.0987325	0.648329
185.7	0.102776	0.646014
185.8	0.10401	0.64391
185.9	0.102542	0.642205
186	0.098517	0.641083
186.1	0.0921789	0.640757
186.2	0.08384	0.641436
186.3	0.0738207	0.643315
186.4	0.0624776	0.646565
186.5	0.05016	0.651339
186.6	0.0372511	0.657729
186.7	0.0241533	0.665795
186.8	0.0112653	0.675543
186.9	-0.00105232	0.686964
187	-0.012464	0.700001
187.1	-0.0226397	0.714583
187.2	-0.0312991	0.730576
187.3	-0.0382838	0.747832
187.4	-0.0433897	0.766196
187.5	-0.0464949	0.785471
187.6	-0.0475382	0.805498
187.7	-0.0465388	0.826071
187.8	-0.0435824	0.84693
187.9	-0.0387721	0.867823
188	-0.0322184	0.888455
188.1	-0.0240473	0.908581
188.2	-0.0144991	0.927893
188.3	-0.00374359	0.94607
188.4	0.00803047	0.962763
188.5	0.0206342	0.977654
188.6	0.0338159	0.990384
188.7	0.0473638	1.00064
188.8	0.0610509	1.00814
188.9	0.074679	1.01267
189	0.0880457	1.01405
189.1	0.100913	1.01219
189.2	0.113047	1.0071
189.3	0.12418	0.998885
189.4	0.134129	0.987723
189.5	0.142609	0.973893
189.6	0.149401	0.957768
189.7	0.154275	0.939803
189.8	0.157059	0.920493
189.9	0.157609	0.900357
190	0.155842	0.879908
190.1	0.151682	0.859684
190.2	0.145157	0.840224
190.3	0.136378	0.822029
190.4	0.125517	0.805506
190.5	0.112843	0.790953
190.6	0.0986734	0.778612
190.7	0.0834108	0.768622
190.8	0.0674215	0.761032
190.9	0.0510908	0.755787
191	0.0347848	0.752722
191.1	0.0188909	0.751612
191.2	0.00369125	0.752137
191.3	-0.0105242	0.753928
191.4	-0.0235438	0.756527
191.5	-0.0352473	0.759468
191.6	-0.045566	0.762247
191.7	-0.0545916	0.764374
191.8	-0.0624556	0.765364
191.9	-0.0693087	0.764777
192	-0.075313	0.762204
192.1	-0.0806364	0.757306
192.2	-0.0855059	0.74976
192.3	-0.0901408	0.73934
192.4	-0.094707	0.725869
192.5	-0.0993132	0.709307
192.6	-0.10403	0.68964
192.7	-0.108871	0.666956
192.8	-0.113815	0.641398
192.9	-0.118799	0.613211
193	-0.123735	0.582667
193.1	-0.128519	0.550135
193.2	-0.133043	0.516037
193.3	-0.137189	0.480784
193.4	-0.140832	0.444809
193.5	-0.143854	0.408572
193.6	-0.146179	0.372511
193.7	-0.14775	0.337029
193.8	-0.148467	0.302519
193.9	-0.148303	0.269347
194	-0.147191	0.23777
194.1	-0.14509	0.208031
194.2	-0.141944	0.180279
194.3	-0.1377	0.154601
194.4	-0.132299	0.131012
194.5	-0.125663	0.109467
194.6	-0.117734	0.0898632
194.7	-0.108509	0.0720486
194.8	-0.0979418	0.0558132
194.9	-0.0860419	0.0409092
195	-0.0728869	0.0270962
195.1	-0.0586409	0.0141205
195.2	-0.0434813	0.00180854
195.3	-0.027677	-0.0100323
195.4	-0.0115408	-0.0215069
195.5	0.004561	-0.0327526
195.6	0.0202451	-0.0438744
195.7	0.0350977	-0.0549007
195.8	0.0487047	-0.0658222
195.9	0.0607172	-0.0765568
196	0.070788	-0.0870873
196.1	0.0786386	-0.097364
196.2	0.0841413	-0.107332
196.3	0.0872045	-0.116922
196.4	0.0878435	-0.126114
196.5	0.0862299	-0.134889
196.6	0.0826269	-0.143261
196.7	0.0774274	-0.151298
196.8	0.0710436	-0.15909
196.9	0.0639291	-0.166765
197	0.056563	-0.174432
197.1	0.0494238	-0.182216
197.2	0.0429464	-0.190229
197.3	0.0374857	-0.198572
197.4	0.0332876	-0.207288
197.5	0.03052	-0.216405
197.6	0.0292249	-0.225889
197.7	0.0293737	-0.235702
197.8	0.0308099	-0.245741
197.9	0.0333162	-0.255844
198	0.0365434	-0.265848
198.1	0.0401159	-0.275552
198.2	0.0436349	-0.284776
198.3	0.0466867	-0.29334
198.4	0.048903	-0.301063
198.5	0.0499139	-0.307771
198.6	0.0494371	-0.313306
198.7	0.0472799	-0.317577
198.8	0.0433393	-0.32052
198.9	0.0376096	-0.322145
199	0.0301786	-0.322466
199.1	0.0211835	-0.321546
199.2	0.0108762	-0.319532
199.3	-0.000461045	-0.316516
199.4	-0.0125231	-0.3127
199.5	-0.0248923	-0.308216
199.6	-0.0372042	-0.303239
199.7	-0.0490641	-0.297914
[truncated: 5,003 more rows]

## Sheet: 16922017-18.abf
	current (pA)
Time (ms)	30 uM 5-HT	100 uM cocaine
0	-0.266835	-0.0335174
0.100098	-0.272609	-0.0191796
0.200195	-0.280515	-0.00166653
0.299805	-0.290374	0.0183397
0.399902	-0.301886	0.0401159
0.5	-0.314826	0.0629007
0.600098	-0.328867	0.0859062
0.700195	-0.343615	0.108366
0.799805	-0.358689	0.129597
0.899902	-0.373626	0.149014
1	-0.387992	0.166125
1.1001	-0.401314	0.180564
1.2002	-0.413183	0.192074
1.2998	-0.42323	0.200501
1.3999	-0.431073	0.205855
1.5	-0.436488	0.208311
1.6001	-0.439309	0.208136
1.7002	-0.439457	0.205635
1.7998	-0.436962	0.201167
1.8999	-0.431862	0.195107
2	-0.424377	0.187839
2.1001	-0.414813	0.17973
2.2002	-0.403551	0.171104
2.2998	-0.391046	0.162238
2.3999	-0.377701	0.153345
2.5	-0.36399	0.144572
2.6001	-0.350364	0.136016
2.7002	-0.337222	0.127705
2.7998	-0.324942	0.11964
2.8999	-0.313783	0.111772
3	-0.304024	0.104048
3.1001	-0.295795	0.0964206
3.2002	-0.289148	0.0888351
3.2998	-0.284049	0.0812451
3.3999	-0.280262	0.0735933
3.5	-0.277545	0.0658663
3.6001	-0.275596	0.0580768
3.7002	-0.274068	0.0502284
3.7998	-0.272601	0.0423665
3.8999	-0.270717	0.0345881
4	-0.267986	0.0269619
4.1001	-0.263941	0.0195574
4.2002	-0.258154	0.0124562
4.2998	-0.25028	0.0057409
4.3999	-0.239966	-0.000521625
4.5	-0.226989	-0.00625246
4.6001	-0.211209	-0.0113298
4.7002	-0.192546	-0.0156205
4.7998	-0.17103	-0.019021
4.8999	-0.146692	-0.0214255
5	-0.119746	-0.0226819
5.1001	-0.0904998	-0.0226469
5.2002	-0.0593531	-0.0212058
5.2998	-0.0267793	-0.0182518
5.3999	0.0067445	-0.0136856
5.5	0.0406385	-0.00741104
5.6001	0.0743123	0.000624018
5.7002	0.107166	0.0104173
5.7998	0.138547	0.0219073
5.8999	0.167869	0.0349932
6	0.194534	0.0494909
6.1001	0.218079	0.0651371
6.2002	0.238085	0.081628
6.2998	0.254172	0.0986135
6.3999	0.266115	0.115707
6.5	0.273701	0.13251
6.6001	0.27684	0.148628
6.7002	0.275508	0.163698
6.7998	0.269764	0.177375
6.8999	0.259823	0.189358
7	0.245879	0.199377
7.1001	0.2282	0.207227
7.2002	0.207119	0.212806
7.2998	0.182973	0.216105
7.3999	0.156175	0.217228
7.5	0.127109	0.216362
7.6001	0.0962043	0.21373
7.7002	0.0638613	0.209591
7.7998	0.0304678	0.204265
7.8999	-0.00351998	0.198115
8	-0.0377278	0.191546
8.1001	-0.0717707	0.184932
8.2002	-0.105243	0.178664
8.2998	-0.137781	0.173118
8.3999	-0.168976	0.168654
8.5	-0.198474	0.165598
8.6001	-0.225895	0.164215
8.7002	-0.2509	0.164723
8.7998	-0.273241	0.167269
8.8999	-0.292633	0.171904
9	-0.308903	0.178614
9.1001	-0.321924	0.187332
9.2002	-0.33161	0.197961
9.2998	-0.337982	0.210314
9.3999	-0.341041	0.224072
9.5	-0.340967	0.238844
9.6001	-0.338013	0.254196
9.7002	-0.3325	0.269657
9.7998	-0.324849	0.284729
9.8999	-0.315488	0.298903
10	-0.304923	0.311678
10.1001	-0.293638	0.322569
10.2002	-0.282172	0.331166
10.2998	-0.271102	0.337115
10.3999	-0.260875	0.340145
10.5	-0.251939	0.340088
10.6001	-0.244693	0.336874
10.7002	-0.239515	0.33057
10.7998	-0.236742	0.321391
10.8999	-0.236531	0.309666
11	-0.239009	0.2958
11.1001	-0.244201	0.2803
11.2002	-0.252028	0.263745
11.2998	-0.262384	0.246708
11.3999	-0.275066	0.229805
11.5	-0.289868	0.213643
11.6001	-0.30651	0.19876
11.7002	-0.324668	0.185638
11.7998	-0.34403	0.174675
11.8999	-0.364209	0.166165
12	-0.384881	0.160293
12.1001	-0.40573	0.157088
12.2002	-0.426463	0.156457
12.2998	-0.446804	0.158225
12.3999	-0.466433	0.162166
12.5	-0.48516	0.167956
12.6001	-0.502803	0.175178
12.7002	-0.519184	0.183421
12.7998	-0.534183	0.192288
12.8999	-0.547649	0.201415
13	-0.559532	0.210478
13.1001	-0.569833	0.219233
13.2002	-0.578549	0.227536
13.2998	-0.585717	0.235325
13.3999	-0.591305	0.242588
13.5	-0.595385	0.249364
13.6001	-0.598057	0.255756
13.7002	-0.599432	0.261915
13.7998	-0.599647	0.268041
13.8999	-0.598766	0.274361
14	-0.59696	0.281058
14.1001	-0.594406	0.288273
14.2002	-0.591235	0.296072
14.2998	-0.587589	0.304445
14.3999	-0.583574	0.313293
14.5	-0.579361	0.322472
14.6001	-0.575072	0.331808
14.7002	-0.570793	0.34105
14.7998	-0.566636	0.349897
14.8999	-0.562616	0.358011
15	-0.558806	0.365076
15.1001	-0.55524	0.370797
15.2002	-0.551925	0.374932
15.2998	-0.548858	0.37731
15.3999	-0.545967	0.37783
15.5	-0.543273	0.376473
15.6001	-0.540769	0.373341
15.7002	-0.53841	0.368612
15.7998	-0.536148	0.362531
15.8999	-0.53389	0.355418
16	-0.531612	0.347629
16.1001	-0.52928	0.339561
16.2002	-0.526892	0.331644
16.2998	-0.524463	0.324277
16.3999	-0.521908	0.317741
16.5	-0.519218	0.312262
16.6001	-0.516398	0.308027
16.7002	-0.513454	0.305141
16.7998	-0.510427	0.303592
16.8999	-0.507312	0.303276
17	-0.504208	0.304016
17.1001	-0.501156	0.305529
17.2002	-0.498216	0.307468
17.2998	-0.49547	0.309474
17.3999	-0.492953	0.311211
17.5	-0.490742	0.312374
17.6001	-0.488867	0.312681
17.7002	-0.487366	0.311932
17.7998	-0.486268	0.30999
17.8999	-0.485518	0.306807
18	-0.485111	0.302407
18.1001	-0.48498	0.296934
18.2002	-0.485016	0.290602
18.2998	-0.485139	0.283676
18.3999	-0.485205	0.276424
18.5	-0.485138	0.269127
18.6001	-0.484787	0.262078
18.7002	-0.484001	0.255547
18.7998	-0.482682	0.249704
18.8999	-0.48068	0.244646
19	-0.477998	0.240391
19.1001	-0.474665	0.236874
19.2002	-0.470724	0.233952
19.2998	-0.466275	0.231425
19.3999	-0.461384	0.22904
19.5	-0.456239	0.22648
19.6001	-0.451005	0.223439
19.7002	-0.445866	0.219618
19.7998	-0.441	0.214706
19.8999	-0.436544	0.208439
20	-0.432699	0.200665
20.1001	-0.429565	0.191333
20.2002	-0.427174	0.180478
20.2998	-0.425574	0.168208
20.3999	-0.424662	0.154689
20.5	-0.424324	0.140172
20.6001	-0.424394	0.125027
20.7002	-0.424672	0.109624
20.7998	-0.424914	0.0943512
20.8999	-0.424776	0.0795939
21	-0.423996	0.0657488
21.1001	-0.422259	0.0531759
21.2002	-0.419287	0.0421872
21.2998	-0.414899	0.0330367
21.3999	-0.408881	0.0259463
21.5	-0.401172	0.0210404
21.6001	-0.391727	0.0183397
21.7002	-0.380577	0.0178206
21.7998	-0.367848	0.0193829
21.8999	-0.353666	0.0228358
22	-0.338314	0.0279382
22.1001	-0.322092	0.0343959
22.2002	-0.305333	0.0418952
22.2998	-0.28841	0.0501107
22.3999	-0.27161	0.0586952
22.5	-0.255267	0.0672767
22.6001	-0.239681	0.07549
22.7002	-0.225113	0.0830166
22.7998	-0.21175	0.0895665
22.8999	-0.199668	0.0948869
23	-0.18896	0.0987721
23.1001	-0.179597	0.101067
23.2002	-0.171495	0.101679
23.2998	-0.164572	0.100568
23.3999	-0.158608	0.0977561
23.5	-0.153431	0.0933343
23.6001	-0.148859	0.08743
23.7002	-0.144688	0.0802105
23.7998	-0.140737	0.0718501
23.8999	-0.136793	0.062518
24	-0.132755	0.0523988
24.1001	-0.128541	0.0416979
24.2002	-0.124136	0.0305663
24.2998	-0.119603	0.019124
24.3999	-0.114976	0.0075229
24.5	-0.11041	-0.00413149
24.6001	-0.106096	-0.0157868
24.7002	-0.102221	-0.0273967
24.7998	-0.0989983	-0.0389103
24.8999	-0.0965836	-0.0503087
25	-0.095208	-0.0615754
25.1001	-0.0950933	-0.0726515
25.2002	-0.0964328	-0.0834329
25.2998	-0.0994005	-0.0937828
25.3999	-0.104057	-0.10357
25.5	-0.110477	-0.112662
25.6001	-0.118644	-0.120881
25.7002	-0.128492	-0.128045
25.7998	-0.13995	-0.133946
25.8999	-0.152807	-0.138378
26	-0.16687	-0.141156
26.1001	-0.181887	-0.142114
26.2002	-0.197585	-0.141082
26.2998	-0.213686	-0.137919
26.3999	-0.229824	-0.132531
26.5	-0.245692	-0.124852
26.6001	-0.260972	-0.114886
26.7002	-0.275376	-0.102685
26.7998	-0.288633	-0.0882849
26.8999	-0.300454	-0.0717427
27	-0.310672	-0.0531314
27.1001	-0.319153	-0.0325688
27.2002	-0.325828	-0.0101872
27.2998	-0.330699	0.0138761
27.3999	-0.333765	0.0394459
27.5	-0.335153	0.0663401
27.6001	-0.335045	0.094365
27.7002	-0.333677	0.123339
27.7998	-0.331342	0.153044
27.8999	-0.328239	0.183208
28	-0.324665	0.213524
28.1001	-0.320942	0.243674
28.2002	-0.317385	0.2733
28.2998	-0.314297	0.302044
28.3999	-0.311877	0.329563
28.5	-0.310369	0.355497
28.6001	-0.309912	0.379484
28.7002	-0.310613	0.401214
28.7998	-0.31257	0.420418
28.8999	-0.315751	0.436878
29	-0.320131	0.450417
29.1001	-0.325617	0.460966
29.2002	-0.332083	0.468528
29.2998	-0.339411	0.473203
29.3999	-0.347408	0.475164
29.5	-0.355939	0.474682
29.6001	-0.364838	0.4721
29.7002	-0.373935	0.467808
29.7998	-0.383111	0.462242
29.8999	-0.392215	0.455841
30	-0.401181	0.44903
30.1001	-0.409917	0.442252
30.2002	-0.418402	0.435912
30.2998	-0.42666	0.430351
30.3999	-0.434644	0.425856
30.5	-0.442427	0.422635
30.6001	-0.450081	0.42083
30.7002	-0.457689	0.420515
30.7998	-0.465363	0.421688
30.8999	-0.473084	0.424306
31	-0.480891	0.428269
31.1001	-0.488794	0.433416
31.2002	-0.496782	0.439566
31.2998	-0.504846	0.446534
31.3999	-0.512876	0.454109
31.5	-0.520824	0.462074
31.6001	-0.528555	0.470238
31.7002	-0.535933	0.478399
31.7998	-0.542861	0.486351
31.8999	-0.54917	0.493904
32	-0.554772	0.500862
32.1001	-0.559558	0.507034
32.2002	-0.563429	0.512257
32.2998	-0.566346	0.516375
32.3999	-0.568268	0.519191
32.5	-0.569221	0.520517
32.6001	-0.569209	0.520186
32.7002	-0.568278	0.518036
32.7998	-0.566526	0.513931
32.8999	-0.563988	0.50777
33	-0.560776	0.499474
33.1001	-0.556987	0.48897
33.2002	-0.552712	0.476213
33.2998	-0.548088	0.461212
33.3999	-0.543171	0.44407
33.5	-0.538097	0.42493
33.6001	-0.532973	0.403972
33.7002	-0.527925	0.381418
33.7998	-0.523091	0.357545
33.8999	-0.518553	0.332674
34	-0.514444	0.30718
34.1001	-0.510874	0.28146
34.2002	-0.507943	0.255883
34.2998	-0.505751	0.23085
34.3999	-0.504276	0.20676
34.5	-0.503528	0.183994
34.6001	-0.50346	0.162886
34.7002	-0.504018	0.143714
34.7998	-0.505162	0.126699
34.8999	-0.50672	0.112015
35	-0.508544	0.0997499
35.1001	-0.510476	0.0899358
35.2002	-0.51235	0.0825339
35.2998	-0.514041	0.0774196
35.3999	-0.515376	0.0744327
35.5	-0.516274	0.0733646
35.6001	-0.516651	0.0739738
35.7002	-0.516449	0.0759914
35.7998	-0.515683	0.0791743
35.8999	-0.514372	0.0832819
36	-0.512618	0.0880737
36.1001	-0.51048	0.0933396
36.2002	-0.508012	0.098945
36.2998	-0.505293	0.104787
36.3999	-0.502331	0.110796
36.5	-0.499199	0.116946
36.6001	-0.495907	0.123254
36.7002	-0.492427	0.129757
36.7998	-0.488696	0.136527
36.8999	-0.484536	0.143648
37	-0.479831	0.151166
37.1001	-0.474446	0.159117
37.2002	-0.468216	0.167535
37.2998	-0.460997	0.176418
37.3999	-0.452595	0.185756
37.5	-0.442934	0.1955
37.6001	-0.43195	0.205551
37.7002	-0.419598	0.215761
37.7998	-0.405892	0.225955
37.8999	-0.390802	0.235973
38	-0.374438	0.245642
38.1001	-0.356924	0.254751
38.2002	-0.338403	0.263094
38.2998	-0.319068	0.270516
38.3999	-0.299068	0.276877
38.5	-0.278647	0.282048
38.6001	-0.258003	0.285925
38.7002	-0.237318	0.28842
38.7998	-0.216843	0.289509
38.8999	-0.196757	0.289202
39	-0.177298	0.287535
39.1001	-0.158654	0.284569
39.2002	-0.141014	0.280379
39.2998	-0.124611	0.275069
39.3999	-0.10964	0.268768
39.5	-0.0963438	0.261599
39.6001	-0.0849424	0.253667
39.7002	-0.0756653	0.245101
39.7998	-0.0687454	0.236009
39.8999	-0.0643206	0.226443
40	-0.0625492	0.216442
40.1001	-0.0635272	0.206022
40.2002	-0.0673188	0.195193
40.2998	-0.0739291	0.183938
40.3999	-0.0831964	0.172238
40.5	-0.0949958	0.160062
40.6001	-0.1091	0.147392
40.7002	-0.125181	0.134215
40.7998	-0.142847	0.120559
40.8999	-0.161542	0.106471
41	-0.180715	0.0920047
41.1001	-0.199773	0.0772762
41.2002	-0.218105	0.0624505
41.2998	-0.235128	0.0477125
41.3999	-0.250217	0.0332629
41.5	-0.26288	0.0193386
41.6001	-0.272666	0.00616092
41.7002	-0.279188	-0.00606054
41.7998	-0.282197	-0.0171219
41.8999	-0.28152	-0.0268498
42	-0.277184	-0.0351169
42.1001	-0.269314	-0.0418252
42.2002	-0.258165	-0.046936
42.2998	-0.244122	-0.0504661
42.3999	-0.227629	-0.052487
42.5	-0.209279	-0.053137
42.6001	-0.189692	-0.0525887
42.7002	-0.169533	-0.0510161
42.7998	-0.149516	-0.0486272
42.8999	-0.130251	-0.0456503
43	-0.112376	-0.0422793
43.1001	-0.0964185	-0.0387073
43.2002	-0.0828497	-0.0351061
43.2998	-0.0720523	-0.0316001
43.3999	-0.0642275	-0.0282698
43.5	-0.0595554	-0.0251515
43.6001	-0.0580565	-0.0222193
43.7002	-0.059642	-0.0194055
43.7998	-0.0641407	-0.0166168
43.8999	-0.0712232	-0.0137207
44	-0.0805716	-0.0105588
44.1001	-0.0917873	-0.00696562
44.2002	-0.104439	-0.00278301
44.2998	-0.118129	0.00215224
44.3999	-0.132369	0.00799811
44.5	-0.146746	0.0148633
44.6001	-0.160861	0.0228142
44.7002	-0.17436	0.0318936
44.7998	-0.186943	0.0421065
44.8999	-0.198275	0.053391
45	-0.208158	0.0656431
45.1001	-0.21644	0.0787138
45.2002	-0.222993	0.09241
45.2998	-0.227761	0.106523
45.3999	-0.230663	0.120834
45.5	-0.231754	0.135124
45.6001	-0.231095	0.149182
45.7002	-0.22881	0.162809
45.7998	-0.225062	0.175832
45.8999	-0.219954	0.188089
46	-0.213674	0.199435
46.1001	-0.20645	0.209745
46.2002	-0.198498	0.218899
46.2998	-0.19006	0.2268
46.3999	-0.181318	0.233391
46.5	-0.172511	0.238643
46.6001	-0.163838	0.242536
46.7002	-0.155486	0.245056
46.7998	-0.147607	0.246154
46.8999	-0.140271	0.245783
47	-0.133608	0.243898
47.1001	-0.127698	0.240479
47.2002	-0.122572	0.235495
47.2998	-0.118236	0.228918
47.3999	-0.114616	0.220768
47.5	-0.111711	0.211124
47.6001	-0.109478	0.200093
47.7002	-0.107853	0.187779
47.7998	-0.106784	0.174349
47.8999	-0.106149	0.160055
48	-0.105938	0.145199
48.1001	-0.106125	0.130105
48.2002	-0.10668	0.115114
48.2998	-0.107584	0.100599
48.3999	-0.108759	0.0869202
48.5	-0.110158	0.0744324
48.6001	-0.111728	0.0634872
48.7002	-0.113404	0.0544179
48.7998	-0.115127	0.047475
48.8999	-0.116775	0.0428443
49	-0.118269	0.0406808
49.1001	-0.119439	0.0410493
49.2002	-0.120101	0.0439224
49.2998	-0.120086	0.049213
49.3999	-0.119106	0.0567852
49.5	-0.116954	0.0664207
49.6001	-0.113425	0.0778213
49.7002	-0.108347	0.0906686
49.7998	-0.101602	0.104618
49.8999	-0.093062	0.119357
50	-0.0827666	0.13457
50.1001	-0.0707914	0.149954
50.2002	-0.0572943	0.165288
50.2998	-0.0425468	0.180393
50.3999	-0.026832	0.195167
50.5	-0.0105809	0.209554
50.6001	0.00574144	0.22354
50.7002	0.0216289	0.237202
50.7998	0.0365326	0.250699
50.8999	0.0499598	0.26422
51	0.0613819	0.277935
51.1001	0.0703283	0.292044
51.2002	0.0764051	0.306753
51.2998	0.0792631	0.322215
51.3999	0.0787088	0.338515
51.5	0.0745998	0.35567
51.6001	0.0669091	0.373604
51.7002	0.0557406	0.392192
51.7998	0.0412751	0.411282
51.8999	0.0238319	0.430638
52	0.00369174	0.449918
52.1001	-0.018789	0.46874
52.2002	-0.0432227	0.486706
52.2998	-0.0692028	0.50342
52.3999	-0.0962376	0.518518
52.5	-0.123947	0.531661
52.6001	-0.151977	0.542532
52.7002	-0.179984	0.550875
52.7998	-0.207682	0.55652
52.8999	-0.234759	0.559376
53	-0.260973	0.559416
53.1001	-0.286092	0.556695
53.2002	-0.309967	0.55132
53.2998	-0.332499	0.543445
53.3999	-0.353518	0.533241
53.5	-0.372934	0.520926
53.6001	-0.390631	0.506766
53.7002	-0.406509	0.491033
53.7998	-0.420533	0.474003
53.8999	-0.432615	0.455953
54	-0.442758	0.437159
54.1001	-0.450966	0.417884
54.2002	-0.457254	0.398368
54.2998	-0.461677	0.378855
54.3999	-0.464237	0.359625
54.5	-0.465078	0.340953
54.6001	-0.464348	0.323109
54.7002	-0.462241	0.306386
54.7998	-0.458986	0.291068
54.8999	-0.454753	0.27741
55	-0.449746	0.26564
55.1001	-0.444184	0.255961
55.2002	-0.438288	0.248555
55.2998	-0.432282	0.243513
55.3999	-0.426298	0.240841
55.5	-0.420535	0.240483
55.6001	-0.415146	0.242283
55.7002	-0.410217	0.246013
55.7998	-0.405828	0.251361
55.8999	-0.401938	0.257907
56	-0.398554	0.265196
56.1001	-0.395618	0.272755
56.2002	-0.393061	0.280097
56.2998	-0.390835	0.286721
56.3999	-0.388798	0.29217
56.5	-0.386903	0.296044
56.6001	-0.38509	0.298004
56.7002	-0.383313	0.297851
56.7998	-0.381573	0.295493
56.8999	-0.379813	0.290931
57	-0.378071	0.28431
57.1001	-0.376381	0.275887
57.2002	-0.374774	0.265997
57.2998	-0.373313	0.255033
57.3999	-0.372011	0.243449
57.5	-0.37093	0.231751
57.6001	-0.37011	0.220489
57.7002	-0.369563	0.21016
57.7998	-0.369277	0.201205
57.8999	-0.36915	0.19393
58	-0.36913	0.188595
58.1001	-0.369095	0.185387
58.2002	-0.368878	0.184379
58.2998	-0.368353	0.185542
58.3999	-0.367315	0.188744
58.5	-0.365652	0.193777
58.6001	-0.36324	0.200352
58.7002	-0.359961	0.208095
58.7998	-0.355758	0.216606
58.8999	-0.350543	0.225471
59	-0.344367	0.234271
59.1001	-0.337281	0.242588
59.2002	-0.329363	0.250046
59.2998	-0.320742	0.256326
59.3999	-0.311484	0.261176
59.5	-0.301776	0.26441
59.6001	-0.291801	0.265888
59.7002	-0.281728	0.265527
59.7998	-0.271717	0.263324
59.8999	-0.261795	0.25934
60	-0.252036	0.253695
60.1001	-0.242496	0.246517
60.2002	-0.233183	0.237972
60.2998	-0.224072	0.228259
60.3999	-0.215049	0.217561
60.5	-0.206051	0.206084
60.6001	-0.196953	0.194024
60.7002	-0.18763	0.18152
60.7998	-0.178022	0.168705
60.8999	-0.168002	0.155716
61	-0.157531	0.142653
61.1001	-0.14656	0.129582
61.2002	-0.135098	0.11654
61.2998	-0.123237	0.103521
61.3999	-0.111035	0.0905668
61.5	-0.0986547	0.0776763
61.6001	-0.086309	0.0648053
61.7002	-0.074231	0.0519461
61.7998	-0.0626792	0.0391325
61.8999	-0.0518565	0.0264077
62	-0.0420473	0.0138099
62.1001	-0.0334764	0.00138993
62.2002	-0.0263873	-0.0107838
62.2998	-0.0210304	-0.0226118
62.3999	-0.0174639	-0.0340003
62.5	-0.0157337	-0.0448366
62.6001	-0.0158406	-0.0549843
62.7002	-0.0177077	-0.064316
62.7998	-0.0212293	-0.0727181
62.8999	-0.0261514	-0.0800713
63	-0.0322495	-0.0862615
63.1001	-0.0392128	-0.0912164
63.2002	-0.046707	-0.0949299
63.2998	-0.0544059	-0.0974013
63.3999	-0.0619071	-0.0986546
63.5	-0.0688789	-0.0987544
63.6001	-0.0750066	-0.0977777
63.7002	-0.0800565	-0.0958151
63.7998	-0.0838733	-0.0929819
63.8999	-0.086294	-0.0893922
64	-0.0872839	-0.0851729
64.1001	-0.0868424	-0.0804658
64.2002	-0.0850173	-0.0753916
64.2998	-0.0819416	-0.0700119
64.3999	-0.0777336	-0.0644071
64.5	-0.072588	-0.0586768
64.6001	-0.0666684	-0.0529172
64.7002	-0.0601376	-0.0472272
64.7998	-0.0532074	-0.0416736
64.8999	-0.0459977	-0.0363529
65	-0.0386613	-0.0314227
65.1001	-0.0313128	-0.0270633
65.2002	-0.0240335	-0.0234533
65.2998	-0.0169028	-0.0207627
65.3999	-0.00988516	-0.0191617
65.5	-0.00299775	-0.0188463
65.6001	0.00378285	-0.0199989
65.7002	0.0104593	-0.0227724
65.7998	0.0169794	-0.0272608
65.8999	0.0233914	-0.0334535
66	0.0296432	-0.0413183
66.1001	0.0356584	-0.0507321
66.2002	0.0413457	-0.0614666
66.2998	0.0465952	-0.0732158
66.3999	0.0513638	-0.0855901
66.5	0.0555225	-0.0981425
66.6001	0.0589698	-0.110375
66.7002	0.0616143	-0.121756
66.7998	0.063358	-0.131739
66.8999	0.0642062	-0.139767
67	0.0641409	-0.145351
67.1001	0.0631774	-0.148112
67.2002	0.0613823	-0.147747
67.2998	0.058879	-0.144047
67.3999	0.0558885	-0.136917
67.5	0.0525942	-0.126393
67.6001	0.0492602	-0.112609
67.7002	0.046159	-0.095813
67.7998	0.0435167	-0.0763668
67.8999	0.041611	-0.0547036
68	0.0406509	-0.0313015
68.1001	0.0408836	-0.00667971
68.2002	0.0424969	0.0185876
68.2998	0.045564	0.0439467
68.3999	0.05017	0.0689421
68.5	0.0562904	0.0931691
68.6001	0.0638752	0.116285
68.7002	0.0727923	0.138033
68.7998	0.0828422	0.158227
68.8999	0.0938385	0.17678
69	0.105473	0.193707
69.1001	0.11742	0.2091
69.2002	0.129338	0.223164
69.2998	0.140837	0.236173
69.3999	0.151583	0.248385
69.5	0.161171	0.260104
69.6001	0.169234	0.271661
69.7002	0.175421	0.283357
69.7998	0.179374	0.295455
69.8999	0.180855	0.308224
70	0.179575	0.321914
70.1001	0.175312	0.336678
70.2002	0.167937	0.352616
70.2998	0.157369	0.369761
70.3999	0.143644	0.388064
70.5	0.126822	0.407429
70.6001	0.107094	0.427721
70.7002	0.0847351	0.448752
70.7998	0.0600905	0.470309
70.8999	0.0336571	0.492141
71	0.00591416	0.513967
71.1001	-0.0225654	0.53551
71.2002	-0.0511511	0.556507
71.2998	-0.079242	0.576651
71.3999	-0.106161	0.595662
71.5	-0.131345	0.61331
71.6001	-0.15425	0.62941
71.7002	-0.174431	0.643779
71.7998	-0.191546	0.656265
71.8999	-0.205315	0.666789
72	-0.215676	0.675318
72.1001	-0.222722	0.681877
72.2002	-0.226684	0.686525
72.2998	-0.227906	0.689345
72.3999	-0.226763	0.69048
72.5	-0.223792	0.69011
72.6001	-0.219582	0.688451
72.7002	-0.21476	0.685717
72.7998	-0.209943	0.682121
72.8999	-0.205639	0.677887
73	-0.202383	0.673238
73.1001	-0.200561	0.668395
73.2002	-0.20042	0.66356
73.2998	-0.202086	0.658879
73.3999	-0.205498	0.654467
73.5	-0.210533	0.650421
73.6001	-0.21691	0.646803
73.7002	-0.224239	0.643669
73.7998	-0.232069	0.641054
73.8999	-0.239828	0.638968
74	-0.247003	0.637416
74.1001	-0.253058	0.636378
74.2002	-0.257508	0.635811
74.2998	-0.259951	0.635673
74.3999	-0.259988	0.635921
74.5	-0.257431	0.636536
74.6001	-0.252236	0.637455
74.7002	-0.244474	0.638586
74.7998	-0.234339	0.639827
74.8999	-0.22206	0.641069
75	-0.208054	0.642204
75.1001	-0.192788	0.643115
75.2002	-0.176809	0.64363
75.2998	-0.160712	0.643553
75.3999	-0.14501	0.642674
75.5	-0.130232	0.640779
75.6001	-0.116884	0.637645
75.7002	-0.105395	0.63306
75.7998	-0.0961508	0.626827
75.8999	-0.0893785	0.618788
76	-0.0852849	0.608824
76.1001	-0.0839674	0.596853
76.2002	-0.0854402	0.582828
76.2998	-0.0896115	0.566729
76.3999	-0.0962019	0.548562
76.5	-0.104985	0.528403
76.6001	-0.115664	0.506372
76.7002	-0.127846	0.48263
76.7998	-0.141106	0.457363
76.8999	-0.154911	0.430791
77	-0.168788	0.403137
77.1001	-0.182227	0.374681
77.2002	-0.194691	0.345696
77.2998	-0.205653	0.316448
77.3999	-0.214581	0.287224
77.5	-0.221104	0.258308
77.6001	-0.224864	0.229968
77.7002	-0.225579	0.202474
77.7998	-0.223068	0.1761
77.8999	-0.217194	0.151063
78	-0.208032	0.127572
78.1001	-0.195779	0.105855
78.2002	-0.180754	0.0861188
78.2998	-0.163415	0.0685155
78.3999	-0.144256	0.0531539
78.5	-0.123908	0.0401088
78.6001	-0.103032	0.0294217
78.7002	-0.0823	0.0210951
78.7998	-0.0624034	0.0150691
78.8999	-0.0439182	0.0112351
79	-0.0273979	0.00945212
79.1001	-0.0132695	0.00952112
79.2002	-0.00183593	0.0112073
79.2998	0.00672576	0.0142584
79.3999	0.0124425	0.0183461
79.5	0.0153865	0.0230892
79.6001	0.015793	0.0281108
79.7002	0.0140225	0.0330723
79.7998	0.010472	0.0376268
79.8999	0.00566094	0.0414176
80	7.14341e-05	0.0440961
80.1001	-0.00580323	0.045359
80.2002	-0.0115358	0.0449495
80.2998	-0.0167947	0.0426615
80.3999	-0.0212482	0.0383477
80.5	-0.0247396	0.0319423
80.6001	-0.0271832	0.0234302
80.7002	-0.0285753	0.0128664
80.7998	-0.0290592	0.000371838
80.8999	-0.028787	-0.0138891
81	-0.0280098	-0.0297005
81.1001	-0.0269612	-0.0467486
81.2002	-0.0259415	-0.0646717
81.2998	-0.0252593	-0.0830867
81.3999	-0.0251144	-0.10159
81.5	-0.0257296	-0.1197
81.6001	-0.0272288	-0.136942
81.7002	-0.0296714	-0.152898
81.7998	-0.0330354	-0.167177
81.8999	-0.0371734	-0.179419
82	-0.0419447	-0.189314
82.1001	-0.0471379	-0.196609
82.2002	-0.0524897	-0.201116
82.2998	-0.0577346	-0.20271
82.3999	-0.0625307	-0.201339
82.5	-0.0665941	-0.197047
82.6001	-0.069612	-0.189964
82.7002	-0.0713162	-0.180284
82.7998	-0.0715631	-0.168255
82.8999	-0.070224	-0.154163
83	-0.0673172	-0.138319
83.1001	-0.0629074	-0.121076
83.2002	-0.0571344	-0.102766
83.2998	-0.0502156	-0.0837427
83.3999	-0.0423683	-0.0643335
83.5	-0.0339484	-0.0448284
83.6001	-0.0252755	-0.0254838
83.7002	-0.0166721	-0.00658351
83.7998	-0.00846116	0.0116526
83.8999	-0.000830603	0.0290321
84	0.00598218	0.0453283
84.1001	0.011791	0.0603255
84.2002	0.0165102	0.0738472
84.2998	0.0200999	0.0857311
84.3999	0.022671	0.095812
84.5	0.0243592	0.10398
84.6001	0.025367	0.110141
84.7002	0.0259213	0.11419
84.7998	0.0262418	0.116054
84.8999	0.0266493	0.115729
85	0.0273778	0.113269
85.1001	0.0286619	0.108746
85.2002	0.0306846	0.102306
85.2998	0.0335076	0.0941625
85.3999	0.0372393	0.0846016
85.5	0.0418792	0.0739846
85.6001	0.0473504	0.0626849
85.7002	0.0534989	0.0511007
85.7998	0.0600906	0.0396606
85.8999	0.0669217	0.0288262
86	0.0737133	0.0190415
86.1001	0.080214	0.010748
86.2002	0.0861832	0.00435144
86.2998	0.0913699	0.000208267
86.3999	0.0956509	-0.00140957
86.5	0.0988688	-0.000291792
86.6001	0.100942	0.003733
86.7002	0.101829	0.010771
86.7998	0.101547	0.0208473
86.8999	0.100265	0.0339414
87	0.0981325	0.0499547
87.1001	0.0953437	0.0687508
87.2002	0.0921203	0.090162
87.2998	0.0886962	0.113975
87.3999	0.0853752	0.139897
87.5	0.0823812	0.167613
87.6001	0.0799164	0.196803
87.7002	0.0781556	0.227138
87.7998	0.0772123	0.258239
87.8999	0.0772249	0.289703
88	0.0781881	0.3211
88.1001	0.0800787	0.351978
88.2002	0.0828343	0.381905
88.2998	0.0863301	0.410465
88.3999	0.0904783	0.437235
88.5	0.0950905	0.461759
88.6001	0.0999852	0.483615
88.7002	0.104987	0.502414
88.7998	0.109902	0.517811
88.8999	0.114604	0.529568
89	0.118894	0.537509
89.1001	0.122609	0.541497
89.2002	0.125652	0.541484
89.2998	0.127928	0.537522
89.3999	0.129448	0.529756
89.5	0.130171	0.518405
89.6001	0.130079	0.503799
89.7002	0.129191	0.486363
89.7998	0.127518	0.466581
89.8999	0.12518	0.445009
90	0.122229	0.422248
90.1001	0.118768	0.398928
90.2002	0.114906	0.375698
90.2998	0.110759	0.353193
90.3999	0.106494	0.332012
90.5	0.102176	0.312738
90.6001	0.0978661	0.295917
90.7002	0.0936318	0.282007
90.7998	0.0895546	0.271394
90.8999	0.0857726	0.264385
91	0.0823281	0.26117
91.1001	0.0792384	0.261821
91.2002	0.0764825	0.266317
91.2998	0.0739768	0.274536
91.3999	0.0716951	0.286217
91.5	0.0695503	0.30101
91.6001	0.06744	0.318456
91.7002	0.0652132	0.338044
91.7998	0.0627142	0.359169
91.8999	0.0598603	0.381205
92	0.0565369	0.403544
92.1001	0.0526965	0.425532
92.2002	0.0482938	0.446512
92.2998	0.0432628	0.465867
92.3999	0.0376337	0.483075
92.5	0.0314262	0.497664
92.6001	0.0247461	0.509267
92.7002	0.0177397	0.517669
92.7998	0.0105446	0.522725
92.8999	0.00336457	0.524382
93	-0.00368287	0.522733
93.1001	-0.0104659	0.517997
93.2002	-0.0168429	0.510472
93.2998	-0.0227327	0.500527
93.3999	-0.0280478	0.48859
93.5	-0.0328555	0.475129
93.6001	-0.0372024	0.460641
93.7002	-0.0411857	0.445603
93.7998	-0.0450218	0.430476
93.8999	-0.0488832	0.415673
94	-0.0529945	0.401547
94.1001	-0.0575744	0.38837
94.2002	-0.0628	0.376363
94.2998	-0.0688419	0.365707
94.3999	-0.0757742	0.35651
94.5	-0.0836859	0.348777
94.6001	-0.0925744	0.342415
94.7002	-0.102344	0.337319
94.7998	-0.112852	0.333371
94.8999	-0.123843	0.330406
95	-0.135048	0.328251
95.1001	-0.146116	0.326729
95.2002	-0.156699	0.325629
95.2998	-0.166475	0.324789
95.3999	-0.175075	0.324125
95.5	-0.182221	0.323548
95.6001	-0.187686	0.322941
95.7002	-0.191313	0.322218
95.7998	-0.193031	0.321358
95.8999	-0.19279	0.320335
96	-0.190742	0.319156
96.1001	-0.187096	0.31781
96.2002	-0.182132	0.316274
96.2998	-0.176211	0.314507
96.3999	-0.169681	0.312501
96.5	-0.163011	0.310273
96.6001	-0.156652	0.307813
96.7002	-0.151019	0.305083
96.7998	-0.146533	0.302015
96.8999	-0.143516	0.298545
97	-0.142273	0.294632
97.1001	-0.143005	0.290221
97.2002	-0.145833	0.285267
97.2998	-0.150809	0.279747
97.3999	-0.157823	0.273676
97.5	-0.166738	0.267079
97.6001	-0.177281	0.259956
97.7002	-0.189125	0.252357
97.7998	-0.201904	0.244334
97.8999	-0.215141	0.235936
98	-0.228398	0.227201
98.1001	-0.241206	0.218146
98.2002	-0.25309	0.208816
98.2998	-0.263657	0.199266
98.3999	-0.272464	0.189529
98.5	-0.279204	0.179585
98.6001	-0.283605	0.169389
98.7002	-0.285464	0.158896
98.7998	-0.284686	0.148025
98.8999	-0.281188	0.136689
99	-0.275007	0.124834
99.1001	-0.266243	0.11242
99.2002	-0.255053	0.0993986
99.2998	-0.241679	0.0857451
99.3999	-0.226338	0.0714701
99.5	-0.209396	0.0565829
99.6001	-0.19122	0.0411071
99.7002	-0.172159	0.0251187
99.7998	-0.152585	0.00872458
99.8999	-0.132823	-0.00798049
100	-0.113264	-0.0249004
100.1	-0.0942326	-0.041927
100.2	-0.0760124	-0.0589536
100.3	-0.0588688	-0.0758965
100.4	-0.0429904	-0.092687
100.5	-0.0285983	-0.109255
100.6	-0.015641	-0.125522
100.7	-0.00403678	-0.141424
100.8	0.00598058	-0.156893
100.9	0.0145986	-0.171893
101	0.0219565	-0.186388
101.1	0.0283098	-0.200329
101.2	0.0339652	-0.213643
101.3	0.0392302	-0.226218
101.4	0.0445921	-0.237937
101.5	0.0504063	-0.248676
101.6	0.0570135	-0.258292
101.7	0.0647183	-0.266623
101.8	0.0737892	-0.273528
101.9	0.0845858	-0.278837
102	0.0971759	-0.282381
102.1	0.111563	-0.283994
102.2	0.127618	-0.283529
102.3	0.14508	-0.280858
102.4	0.163747	-0.275861
102.5	0.183155	-0.268451
102.6	0.202811	-0.258538
102.7	0.222149	-0.246088
102.8	0.240479	-0.231112
102.9	0.257252	-0.213666
103	0.271776	-0.193824
103.1	0.283484	-0.171672
103.2	0.291893	-0.147362
103.3	0.296537	-0.121118
103.4	0.297178	-0.0932131
103.5	0.293563	-0.0639104
103.6	0.285665	-0.0335184
103.7	0.273581	-0.00242108
103.8	0.257487	0.0289718
103.9	0.237861	0.0602634
104	0.21518	0.0910152
104.1	0.190039	0.120783
104.2	0.163091	0.14911
104.3	0.134995	0.175529
104.4	0.106585	0.199557
104.5	0.0785624	0.22077
104.6	0.051688	0.23882
104.7	0.0266675	0.253412
104.8	0.00407492	0.264294
104.9	-0.0154553	0.271274
105	-0.0315577	0.27423
105.1	-0.0439143	0.273133
105.2	-0.0522751	0.268082
105.3	-0.0565609	0.259295
105.4	-0.0566664	0.247061
105.5	-0.0527486	0.231753
105.6	-0.0450197	0.213838
105.7	-0.0337647	0.193854
105.8	-0.0193984	0.172419
105.9	-0.00225097	0.150178
106	0.0171896	0.127798
106.1	0.0384612	0.10593
106.2	0.0610703	0.0851542
106.3	0.0845306	0.0659925
106.4	0.108544	0.0489242
106.5	0.132675	0.034341
106.6	0.156528	0.0225108
106.7	0.179757	0.0135553
106.8	0.202031	0.00749231
106.9	0.22324	0.00420029
107	0.243147	0.00345467
107.1	0.261649	0.00495063
107.2	0.278702	0.00832195
107.3	0.29425	0.0131607
107.4	0.308436	0.0190296
107.5	0.32127	0.0255068
107.6	0.332811	0.0321939
107.7	0.343106	0.0386831
107.8	0.352127	0.044664
107.9	0.360029	0.049929
108	0.366803	0.0543601
108.1	0.372452	0.0579269
108.2	0.376894	0.0606875
108.3	0.379938	0.0627559
108.4	0.38154	0.0642889
108.5	0.381467	0.0655065
108.6	0.379453	0.0666678
108.7	0.37526	0.0680135
108.8	0.368641	0.0698013
108.9	0.359552	0.0722534
109	0.347842	0.0755334
109.1	0.333483	0.079763
109.2	0.31656	0.0849901
109.3	0.297231	0.0911571
109.4	0.275936	0.098193
109.5	0.253072	0.105992
109.6	0.229205	0.114378
109.7	0.204978	0.1231
109.8	0.180983	0.131887
109.9	0.157986	0.140448
110	0.136606	0.148551
110.1	0.117476	0.155974
110.2	0.101122	0.162516
110.3	0.0878695	0.168007
110.4	0.0780312	0.172337
110.5	0.0716062	0.175457
110.6	0.0684969	0.177345
110.7	0.0684429	0.178045
110.8	0.0709729	0.177677
110.9	0.0756515	0.176394
111	0.0817664	0.174337
111.1	0.0885762	0.171656
111.2	0.0953584	0.168519
111.3	0.101374	0.165072
111.4	0.106072	0.161446
111.5	0.108819	0.157744
111.6	0.109115	0.154053
111.7	0.106598	0.150469
111.8	0.101	0.147041
111.9	0.0922855	0.14379
112	0.0803861	0.140723
112.1	0.0654374	0.137884
112.2	0.0476646	0.135348
112.3	0.0272943	0.133231
112.4	0.0048073	0.131672
112.5	-0.0194471	0.130812
112.6	-0.0450725	0.130798
112.7	-0.0716472	0.13181
112.8	-0.0987526	0.134071
112.9	-0.125811	0.137798
113	-0.152433	0.143185
113.1	-0.178177	0.150394
113.2	-0.202671	0.159513
113.3	-0.225604	0.17056
113.4	-0.24652	0.183508
113.5	-0.265146	0.198269
113.6	-0.281209	0.214658
113.7	-0.294438	0.232381
113.8	-0.304655	0.251048
113.9	-0.311608	0.270199
114	-0.315284	0.289354
114.1	-0.315651	0.30802
114.2	-0.312754	0.325669
114.3	-0.306772	0.341807
114.4	-0.297833	0.355974
114.5	-0.28627	0.367752
114.6	-0.272399	0.376807
114.7	-0.256616	0.382924
114.8	-0.239452	0.385976
114.9	-0.22134	0.385941
115	-0.202853	0.382899
115.1	-0.184501	0.377065
115.2	-0.16679	0.368735
115.3	-0.150254	0.358267
115.4	-0.135196	0.34608
115.5	-0.121965	0.332638
115.6	-0.110753	0.318461
115.7	-0.101638	0.304066
115.8	-0.094667	0.289906
115.9	-0.0896493	0.276402
116	-0.0864618	0.263923
116.1	-0.0848571	0.25278
116.2	-0.084506	0.243229
116.3	-0.0850795	0.235473
116.4	-0.0861043	0.22963
116.5	-0.0872932	0.225706
116.6	-0.0883469	0.223624
116.7	-0.0890413	0.223276
116.8	-0.0892816	0.22451
116.9	-0.0888879	0.227114
117	-0.0879412	0.230785
117.1	-0.0865631	0.235182
117.2	-0.0849095	0.23997
117.3	-0.0832115	0.244805
117.4	-0.0815363	0.249264
117.5	-0.0801061	0.252905
117.6	-0.0790765	0.255332
117.7	-0.0785833	0.256183
117.8	-0.078694	0.255078
117.9	-0.0792294	0.251644
118	-0.0801069	0.245562
118.1	-0.081109	0.236605
118.2	-0.0819546	0.224642
118.3	-0.0823444	0.209639
118.4	-0.0817952	0.19166
118.5	-0.0800313	0.170857
118.6	-0.0767529	0.147515
118.7	-0.0717165	0.12205
118.8	-0.0647992	0.0949556
118.9	-0.0558227	0.0668029
119	-0.0448589	0.0382398
119.1	-0.0320468	0.00995513
119.2	-0.0176601	-0.0173538
119.3	-0.0020773	-0.043011
119.4	0.0143978	-0.0663995
119.5	0.0312345	-0.0869862
119.6	0.0479259	-0.104306
119.7	0.0639575	-0.117985
119.8	0.0787802	-0.127772
119.9	0.0921005	-0.133567
120	0.103543	-0.135374
120.1	0.112858	-0.133318
120.2	0.119869	-0.127619
120.3	0.124449	-0.118563
120.4	0.126733	-0.106517
120.5	0.126828	-0.0919016
120.6	0.124961	-0.0751133
120.7	0.12144	-0.0565048
120.8	0.116571	-0.0364536
120.9	0.110837	-0.0153519
121	0.104588	0.00645126
121.1	0.0982347	0.0286719
121.2	0.092175	0.0510558
121.3	0.0867197	0.0733703
121.4	0.0822681	0.0954126
121.5	0.0790104	0.116984
121.6	0.0771401	0.137895
121.7	0.0767819	0.157965
121.8	0.0779628	0.177053
121.9	0.0808425	0.195036
122	0.0853738	0.211751
122.1	0.091502	0.227046
122.2	0.0991279	0.240801
122.3	0.108084	0.252902
122.4	0.11835	0.26326
122.5	0.129744	0.271828
122.6	0.142134	0.278563
122.7	0.155405	0.283423
122.8	0.169421	0.286387
122.9	0.184193	0.287427
123	0.19957	0.286517
123.1	0.215469	0.283654
123.2	0.231847	0.278812
123.3	0.248623	0.271953
123.4	0.265868	0.263042
123.5	0.283508	0.252074
123.6	0.301524	0.239024
123.7	0.319896	0.223866
123.8	0.338563	0.206609
123.9	0.357578	0.187307
124	0.376822	0.166036
124.1	0.396226	0.142931
124.2	0.415694	0.118184
124.3	0.435039	0.0920607
124.4	0.454186	0.0648919
124.5	0.472894	0.0371049
124.6	0.49095	0.00917051
124.7	0.508097	-0.0184286
124.8	0.523973	-0.0452202
124.9	0.53835	-0.0706863
125	0.550862	-0.0943164
125.1	0.561164	-0.115705
125.2	0.568885	-0.134538
125.3	0.573611	-0.150582
125.4	0.575126	-0.163676
125.5	0.573119	-0.173793
125.6	0.567437	-0.181047
125.7	0.558021	-0.185643
125.8	0.544825	-0.187859
125.9	0.528046	-0.188057
126	0.507866	-0.18668
126.1	0.484667	-0.184226
126.2	0.458959	-0.181207
126.3	0.431301	-0.178114
126.4	0.402503	-0.175401
126.5	0.373306	-0.173445
126.6	0.344523	-0.172547
126.7	0.31699	-0.172937
126.8	0.291488	-0.174737
126.9	0.268889	-0.177956
127	0.249823	-0.182551
127.1	0.234868	-0.188421
127.2	0.224457	-0.195368
127.3	0.218832	-0.203136
127.4	0.218216	-0.211448
127.5	0.222499	-0.22
127.6	0.231466	-0.228509
127.7	0.244741	-0.236736
127.8	0.261782	-0.24443
127.9	0.282054	-0.251347
128	0.304767	-0.257258
128.1	0.329107	-0.261954
128.2	0.354254	-0.265249
128.3	0.379344	-0.266958
128.4	0.403678	-0.266874
128.5	0.426433	-0.2648
128.6	0.446914	-0.260581
128.7	0.464528	-0.254074
128.8	0.478747	-0.245072
128.9	0.48933	-0.233319
129	0.495994	-0.218606
129.1	0.498659	-0.200802
129.2	0.497415	-0.179794
129.3	0.49244	-0.155533
129.4	0.484202	-0.128059
129.5	0.473104	-0.0974841
129.6	0.459667	-0.0639955
129.7	0.444485	-0.0278869
129.8	0.428152	0.0104226
129.9	0.411406	0.050423
130	0.394801	0.091566
130.1	0.378908	0.133237
130.2	0.364218	0.174788
130.3	0.351045	0.21558
130.4	0.339725	0.254998
130.5	0.330302	0.292495
130.6	0.32273	0.327645
130.7	0.316851	0.360126
130.8	0.312367	0.389693
130.9	0.309035	0.416241
131	0.30634	0.439795
131.1	0.303766	0.460484
131.2	0.30079	0.478572
131.3	0.29687	0.494402
131.4	0.291667	0.508348
131.5	0.284748	0.520758
131.6	0.275796	0.531974
131.7	0.264609	0.542347
131.8	0.251048	0.552161
131.9	0.235218	0.561574
132	0.217171	0.570642
132.1	0.19708	0.57935
132.2	0.175209	0.587552
132.3	0.151835	0.594998
132.4	0.127452	0.601374
132.5	0.102433	0.606294
132.6	0.0772082	0.609347
132.7	0.0522354	0.610128
132.8	0.0279234	0.608248
132.9	0.00478114	0.603336
133	-0.0168674	0.595108
133.1	-0.0366081	0.583378
133.2	-0.0540411	0.568054
133.3	-0.0689261	0.54915
133.4	-0.0809182	0.526787
133.5	-0.0898442	0.501218
133.6	-0.0955459	0.472781
133.7	-0.0979462	0.441884
133.8	-0.0970915	0.408981
133.9	-0.0929298	0.374586
134	-0.0856102	0.339252
134.1	-0.0753194	0.303575
134.2	-0.0623362	0.268158
134.3	-0.0470324	0.23356
134.4	-0.0296673	0.200296
134.5	-0.0107372	0.168813
134.6	0.00929743	0.139521
134.7	0.0299487	0.112806
134.8	0.0506417	0.088991
134.9	0.0709663	0.0683043
135	0.0903734	0.050949
135.1	0.108391	0.0370796
135.2	0.124611	0.026773
135.3	0.138652	0.0200316
135.4	0.150339	0.0168062
135.5	0.159401	0.0169888
135.6	0.165708	0.0204073
135.7	0.169223	0.0268769
135.8	0.169947	0.0361665
135.9	0.168103	0.0479667
136	0.163825	0.0618997
136.1	0.157372	0.0775506
136.2	0.149025	0.0945222
136.3	0.139039	0.11239
136.4	0.127823	0.130739
136.5	0.115672	0.149161
136.6	0.102925	0.167274
136.7	0.0898801	0.184706
136.8	0.0767527	0.201089
136.9	0.063888	0.216098
137	0.051457	0.229481
137.1	0.0396439	0.241063
137.2	0.0285871	0.250707
137.3	0.018321	0.258332
137.4	0.00903023	0.263888
137.5	0.000739825	0.267361
137.6	-0.00644933	0.268787
137.7	-0.0124931	0.268243
137.8	-0.0174282	0.265834
137.9	-0.021144	0.261716
138	-0.0236864	0.25606
138.1	-0.0250949	0.249056
138.2	-0.0254302	0.240901
138.3	-0.0248411	0.231828
138.4	-0.0233192	0.222113
138.5	-0.0210333	0.212034
138.6	-0.0181023	0.201843
138.7	-0.0146726	0.191807
138.8	-0.0109752	0.182222
138.9	-0.00704522	0.173365
139	-0.00301416	0.165461
139.1	0.00107365	0.158718
139.2	0.0051946	0.153317
139.3	0.00933637	0.149405
139.4	0.013686	0.147063
139.5	0.0183317	0.146347
139.6	0.0234957	0.147238
139.7	0.0293988	0.149638
139.8	0.0362197	0.153443
139.9	0.0443058	0.158525
140	0.0538019	0.164676
140.1	0.0648842	0.171606
140.2	0.0776607	0.179015
140.3	0.09213	0.186589
140.4	0.108336	0.194002
140.5	0.126071	0.200899
140.6	0.145089	0.206926
140.7	0.16507	0.211751
140.8	0.185566	0.215073
140.9	0.20624	0.21663
141	0.226594	0.216215
141.1	0.246167	0.213672
141.2	0.264486	0.208882
141.3	0.281089	0.20178
141.4	0.295734	0.192386
141.5	0.308063	0.180817
141.6	0.317913	0.167283
141.7	0.325259	0.152042
141.8	0.330114	0.135393
141.9	0.332721	0.117673
142	0.333263	0.0992433
142.1	0.332065	0.0804695
142.2	0.329548	0.0616994
142.3	0.326084	0.0432697
142.4	0.322207	0.0254866
142.5	0.318332	0.00864801
142.6	0.314877	-0.00702804
142.7	0.312221	-0.0214072
142.8	0.310641	-0.0343801
142.9	0.310491	-0.0458605
143	0.311866	-0.0558325
143.1	0.31483	-0.0643415
143.2	0.319376	-0.0714486
143.3	0.325373	-0.0772242
143.4	0.332758	-0.0817316
143.5	0.341256	-0.0850534
143.6	0.350603	-0.0872724
143.7	0.360509	-0.0885021
143.8	0.370611	-0.0888521
143.9	0.380753	-0.0884162
144	0.390622	-0.0872728
144.1	0.399964	-0.0855229
144.2	0.408572	-0.0832837
144.3	0.416237	-0.0806725
144.4	0.422952	-0.0778247
144.5	0.428589	-0.0748927
144.6	0.433156	-0.0720564
144.7	0.436724	-0.0694964
144.8	0.439351	-0.0673909
144.9	0.44126	-0.0659128
145	0.442535	-0.0652005
145.1	0.443348	-0.0653316
145.2	0.443869	-0.0663665
145.3	0.444226	-0.0683115
145.4	0.444682	-0.0711027
145.5	0.445334	-0.0746155
145.6	0.446281	-0.0786517
145.7	0.447593	-0.0829753
145.8	0.449255	-0.0873213
145.9	0.451389	-0.0913688
146	0.453936	-0.0947606
146.1	0.456868	-0.0971002
146.2	0.460117	-0.0980004
146.3	0.463567	-0.0971315
146.4	0.467242	-0.0942271
146.5	0.471013	-0.0891044
146.6	0.474796	-0.0816819
146.7	0.478532	-0.0719204
146.8	0.482156	-0.0598461
146.9	0.485759	-0.0455654
147	0.489251	-0.0292679
147.1	0.492591	-0.0112412
147.2	0.495773	0.00816773
147.3	0.498738	0.0285817
147.4	0.501558	0.0496275
147.5	0.504124	0.0709186
147.6	0.506336	0.0920968
147.7	0.508094	0.11284
147.8	0.509219	0.132866
147.9	0.50969	0.15195
148	0.509343	0.169927
148.1	0.508061	0.18667
148.2	0.505719	0.202119
148.3	0.502167	0.216243
148.4	0.497472	0.229045
148.5	0.491612	0.240572
148.6	0.484689	0.250859
148.7	0.476881	0.259952
148.8	0.468378	0.267923
148.9	0.459574	0.274837
149	0.450737	0.280709
149.1	0.442222	0.285533
149.2	0.434458	0.289318
149.3	0.427786	0.292069
149.4	0.422636	0.293766
149.5	0.419233	0.294408
149.6	0.417762	0.293999
149.7	0.41833	0.292557
149.8	0.420899	0.290116
149.9	0.425465	0.28672
150	0.431745	0.282443
150.1	0.439406	0.277415
150.2	0.448027	0.271783
150.3	0.457063	0.265685
150.4	0.4661	0.259257
150.5	0.474531	0.252637
150.6	0.481839	0.245961
150.7	0.487523	0.239363
150.8	0.491141	0.232949
150.9	0.492469	0.226815
151	0.491223	0.221007
151.1	0.487276	0.215532
151.2	0.480605	0.210379
151.3	0.471245	0.205518
151.4	0.459521	0.200896
151.5	0.445715	0.196451
151.6	0.430161	0.19213
151.7	0.413228	0.187928
151.8	0.395253	0.183887
151.9	0.376718	0.180087
152	0.357929	0.176608
152.1	0.339233	0.173536
152.2	0.320929	0.170998
152.3	0.303147	0.169202
152.4	0.286146	0.168378
152.5	0.269996	0.168751
152.6	0.254747	0.170531
152.7	0.240416	0.1739
152.8	0.226934	0.178993
152.9	0.214375	0.185897
153	0.202689	0.194614
153.1	0.19188	0.205052
153.2	0.181962	0.217082
153.3	0.17289	0.230509
153.4	0.164802	0.24507
153.5	0.157672	0.260452
153.6	0.151518	0.276315
153.7	0.146386	0.2923
153.8	0.142217	0.308053
153.9	0.139071	0.32319
154	0.136825	0.337375
154.1	0.13538	0.350323
154.2	0.134601	0.361791
154.3	0.134287	0.371609
154.4	0.134319	0.379667
154.5	0.134427	0.385931
154.6	0.134398	0.39046
154.7	0.134053	0.393322
154.8	0.133162	0.394597
154.9	0.131664	0.394422
155	0.129432	0.392982
155.1	0.126458	0.390489
155.2	0.122778	0.387146
155.3	0.118402	0.383154
155.4	0.11357	0.378711
155.5	0.108442	0.373981
155.6	0.103257	0.369112
155.7	0.0982611	0.364237
155.8	0.0936479	0.359467
155.9	0.0897396	0.354875
156	0.0866799	0.350533
156.1	0.0846308	0.346549
156.2	0.0837187	0.342974
156.3	0.0839721	0.339807
156.4	0.0855053	0.337018
156.5	0.0882241	0.334601
156.6	0.0920227	0.332578
156.7	0.0967438	0.330929
156.8	0.102149	0.329564
156.9	0.108156	0.328381
157	0.114515	0.327301
157.1	0.121039	0.326218
157.2	0.127547	0.32498
157.3	0.133836	0.323407
157.4	0.139913	0.321326
157.5	0.14566	0.31857
157.6	0.151006	0.314974
157.7	0.155869	0.310383
157.8	0.16017	0.304679
157.9	0.164007	0.297781
158	0.167311	0.289633
158.1	0.170072	0.280222
158.2	0.172303	0.269615
158.3	0.173939	0.257938
158.4	0.17505	0.24536
158.5	0.175523	0.232079
158.6	0.175294	0.218347
158.7	0.174311	0.204416
158.8	0.172459	0.190514
158.9	0.169823	0.176852
159	0.166369	0.163633
159.1	0.162129	0.151016
159.2	0.157177	0.139117
159.3	0.151579	0.128006
159.4	0.145607	0.117711
159.5	0.139399	0.108224
159.6	0.133186	0.0995068
159.7	0.127244	0.0914763
159.8	0.121813	0.0840427
159.9	0.117294	0.0771433
160	0.113912	0.0707721
160.1	0.111895	0.0649578
160.2	0.111446	0.0597237
160.3	0.112695	0.0550902
160.4	0.115828	0.0511027
160.5	0.120771	0.0478544
160.6	0.127455	0.0454682
160.7	0.13576	0.044008
160.8	0.145478	0.0435022
160.9	0.156497	0.0439786
161	0.168464	0.0454363
161.1	0.181036	0.0477796
161.2	0.193872	0.0508638
161.3	0.206603	0.054487
161.4	0.219034	0.0583673
161.5	0.230844	0.0621778
161.6	0.241829	0.0655865
161.7	0.251857	0.0682655
161.8	0.260835	0.0698847
161.9	0.268857	0.0701714
162	0.275913	0.0688619
162.1	0.282126	0.0657583
162.2	0.28769	0.0607447
162.3	0.292774	0.053779
162.4	0.297752	0.0448985
162.5	0.302854	0.0341928
162.6	0.308313	0.0217786
162.7	0.314316	0.00782185
162.8	0.320991	-0.00744944
162.9	0.328544	-0.0237747
163	0.33693	-0.0409194
163.1	0.34606	-0.0586701
163.2	0.355791	-0.0768338
163.3	0.365867	-0.0952505
163.4	0.376102	-0.113798
163.5	0.38607	-0.132367
163.6	0.395375	-0.150863
163.7	0.403598	-0.169223
163.8	0.410284	-0.187416
163.9	0.415181	-0.205385
164	0.41792	-0.223053
164.1	0.418262	-0.240343
164.2	0.416076	-0.257132
164.3	0.411294	-0.273274
164.4	0.404152	-0.288596
164.5	0.394852	-0.302939
164.6	0.383754	-0.316155
164.7	0.371373	-0.328049
164.8	0.358271	-0.338383
164.9	0.345228	-0.346972
165	0.332914	-0.353708
165.1	0.32205	-0.358483
165.2	0.313368	-0.361215
165.3	0.307536	-0.361919
165.4	0.305271	-0.360701
165.5	0.306972	-0.357726
165.6	0.313001	-0.353149
165.7	0.32349	-0.347168
165.8	0.338139	-0.340048
165.9	0.356793	-0.332093
166	0.37915	-0.323603
166.1	0.404819	-0.314888
166.2	0.433135	-0.30624
166.3	0.46315	-0.297874
166.4	0.493904	-0.289929
166.5	0.524176	-0.282531
166.6	0.552746	-0.275765
166.7	0.578397	-0.269618
166.8	0.599839	-0.26398
166.9	0.615959	-0.258672
167	0.625523	-0.253463
167.1	0.627361	-0.248088
167.2	0.620365	-0.242271
167.3	0.603481	-0.235722
167.4	0.575929	-0.228155
167.5	0.536915	-0.219309
167.6	0.485867	-0.208976
167.7	0.422395	-0.197012
167.8	0.346271	-0.183374
167.9	0.257662	-0.168108
168	0.156932	-0.15136
168.1	0.0448832	-0.133345
168.2	-0.0772712	-0.114359
168.3	-0.207907	-0.0947567
168.4	-0.344758	-0.0749329
168.5	-0.485279	-0.0553062
168.6	-0.626463	-0.0363344
168.7	-0.764873	-0.0184175
168.8	-0.896765	-0.00188594
168.9	-1.01802	0.0129335
169	-1.12456	0.0257925
169.1	-1.21235	0.0365908
169.2	-1.27756	0.0452943
169.3	-1.3169	0.0519456
169.4	-1.32748	0.0566919
169.5	-1.30736	0.0597625
169.6	-1.25547	0.0614386
169.7	-1.1717	0.0620449
169.8	-1.05703	0.0619683
169.9	-0.913324	0.0616046
170	-0.743614	0.0613419
170.1	-0.55179	0.0615347
170.2	-0.342471	0.0625126
170.3	-0.120868	0.0645382
170.4	0.107634	0.0677722
170.5	0.33735	0.0723338
170.6	0.562793	0.0782891
170.7	0.778825	0.085634
170.8	0.980774	0.0942763
170.9	1.16482	0.104019
171	1.32777	0.114629
171.1	1.46738	0.125843
171.2	1.5823	0.137368
171.3	1.67199	0.148887
171.4	1.73686	0.160058
171.5	1.77792	0.170541
171.6	1.79684	0.180019
171.7	1.79578	0.188236
171.8	1.77715	0.19499
171.9	1.7437	0.200142
172	1.6981	0.203606
172.1	1.64305	0.205366
172.2	1.58109	0.20549
172.3	1.51449	0.204124
172.4	1.44543	0.201492
172.5	1.37562	0.197896
172.6	1.30652	0.193692
172.7	1.23924	0.189234
172.8	1.17452	0.184852
172.9	1.113	0.180882
173	1.05492	0.177645
173.1	1.00033	0.175407
173.2	0.949123	0.174368
173.3	0.900991	0.174687
173.4	0.855713	0.176457
173.5	0.812859	0.179691
173.6	0.772011	0.184329
173.7	0.732804	0.190266
173.8	0.694949	0.19732
173.9	0.658199	0.205306
174	0.622127	0.214044
174.1	0.586486	0.223376
174.2	0.551222	0.233158
174.3	0.516379	0.243271
174.4	0.482238	0.253633
174.5	0.448976	0.264209
174.6	0.416791	0.274981
174.7	0.38585	0.285937
174.8	0.356331	0.297073
174.9	0.328563	0.308408
175	0.302676	0.319922
175.1	0.278811	0.331561
175.2	0.257067	0.343227
175.3	0.237763	0.354752
175.4	0.221456	0.365894
175.5	0.207656	0.376341
175.6	0.195646	0.385695
175.7	0.185075	0.393559
175.8	0.175844	0.399533
175.9	0.168116	0.403181
176	0.161891	0.404047
176.1	0.157207	0.401718
176.2	0.154187	0.395839
176.3	0.153017	0.386132
176.4	0.154237	0.372423
176.5	0.158455	0.354636
176.6	0.166476	0.3328
176.7	0.179256	0.307039
176.8	0.197852	0.277591
176.9	0.223585	0.244834
177	0.257661	0.20921
177.1	0.301302	0.171241
177.2	0.355571	0.131533
177.3	0.421237	0.0906859
177.4	0.498872	0.0493181
177.5	0.588474	0.00810007
177.6	0.689559	-0.0323436
177.7	0.80097	-0.0714287
177.8	0.920836	-0.108615
177.9	1.04675	-0.14342
178	1.17543	-0.175417
178.1	1.30306	-0.204234
178.2	1.42531	-0.229562
178.3	1.53742	-0.251168
178.4	1.63463	-0.268835
178.5	1.71214	-0.282427
178.6	1.76546	-0.291873
178.7	1.79064	-0.29716
178.8	1.78447	-0.298338
178.9	1.74497	-0.295488
179	1.67117	-0.288701
179.1	1.56353	-0.278125
179.2	1.42384	-0.263967
179.3	1.25522	-0.246512
179.4	1.06222	-0.22609
179.5	0.850288	-0.203069
179.6	0.625764	-0.177878
179.7	0.395581	-0.151025
179.8	0.166866	-0.123042
179.9	-0.0532024	-0.0944883
180	-0.258045	-0.0659731
180.1	-0.441759	-0.0381275
180.2	-0.59944	-0.0115519
180.3	-0.727386	0.013158
180.4	-0.823012	0.0353934
180.5	-0.885271	0.0545529
180.6	-0.914381	0.070113
180.7	-0.911755	0.0816807
180.8	-0.879928	0.0889795
180.9	-0.822169	0.0918296
181	-0.742548	0.0901262
181.1	-0.645487	0.0838941
181.2	-0.535575	0.0733043
181.3	-0.417391	0.0586745
181.4	-0.295079	0.0404752
181.5	-0.172517	0.0193119
181.6	-0.0530125	-0.00412467
181.7	0.060724	-0.0290725
181.8	0.166541	-0.0546752
181.9	0.263093	-0.0800723
182	0.349501	-0.104448
182.1	0.425475	-0.127006
182.2	0.491177	-0.147015
182.3	0.547089	-0.163876
182.4	0.594108	-0.177147
182.5	0.633131	-0.186531
182.6	0.665239	-0.191922
182.7	0.691563	-0.193426
182.8	0.713104	-0.191387
182.9	0.73092	-0.186328
183	0.745838	-0.178896
183.1	0.758597	-0.169825
183.2	0.769764	-0.159913
183.3	0.779546	-0.150014
183.4	0.78824	-0.140971
183.5	0.796401	-0.133558
183.6	0.804458	-0.128429
183.7	0.812394	-0.12611
183.8	0.819927	-0.126945
183.9	0.826958	-0.131077
184	0.833335	-0.138435
184.1	0.839084	-0.148743
184.2	0.844269	-0.161562
184.3	0.848936	-0.176346
184.4	0.853271	-0.192428
184.5	0.85729	-0.209061
184.6	0.861073	-0.225449
184.7	0.864677	-0.240824
184.8	0.868108	-0.254492
184.9	0.871502	-0.265851
185	0.874815	-0.274409
185.1	0.878005	-0.279807
185.2	0.88105	-0.281843
185.3	0.883872	-0.280439
185.4	0.886509	-0.275652
185.5	0.888795	-0.267687
185.6	0.890595	-0.256833
185.7	0.891814	-0.243479
185.8	0.892297	-0.228025
185.9	0.892072	-0.21088
186	0.891037	-0.192456
186.1	0.889135	-0.173142
186.2	0.886346	-0.153316
186.3	0.882634	-0.133333
186.4	0.878137	-0.113481
186.5	0.872852	-0.0939598
186.6	0.866861	-0.0749207
186.7	0.860269	-0.0564619
186.8	0.853138	-0.038661
186.9	0.845676	-0.0215839
187	0.837989	-0.00528424
187.1	0.830215	0.0102136
187.2	0.822464	0.0248942
187.3	0.814782	0.038746
187.4	0.807344	0.0517343
187.5	0.800151	0.0638128
187.6	0.793262	0.0748979
187.7	0.786699	0.0849082
187.8	0.780388	0.0937649
187.9	0.774369	0.101403
188	0.768524	0.10778
188.1	0.762703	0.112861
188.2	0.756722	0.116584
188.3	0.750336	0.11892
188.4	0.743465	0.119896
188.5	0.735842	0.119578
188.6	0.727261	0.11802
188.7	0.71754	0.115301
188.8	0.706491	0.111524
188.9	0.694076	0.106803
189	0.680158	0.101313
189.1	0.66472	0.0952317
189.2	0.647787	0.0887213
189.3	0.629376	0.0819632
189.4	0.60971	0.0751288
189.5	0.588896	0.0683611
189.6	0.567141	0.061818
189.7	0.544693	0.0556606
189.8	0.521792	0.0500244
189.9	0.4988	0.0450087
190	0.47588	0.0406842
190.1	0.453231	0.0370461
190.2	0.431032	0.0340711
190.3	0.409365	0.0317262
190.4	0.388395	0.0299516
190.5	0.36807	0.0286525
190.6	0.348335	0.0277218
190.7	0.329082	0.0270466
190.8	0.310117	0.0265568
190.9	0.291332	0.0261691
191	0.272367	0.0258186
191.1	0.252859	0.0254584
191.2	0.232371	0.0251034
191.3	0.210371	0.0248278
191.4	0.186431	0.0247498
191.5	0.159909	0.0250277
191.6	0.1301	0.0258631
191.7	0.0962488	0.0274712
191.8	0.0574962	0.0300868
191.9	0.0130894	0.0339363
192	-0.0379802	0.0392286
192.1	-0.0967171	0.0461051
192.2	-0.164192	0.0546474
192.3	-0.241554	0.0648848
192.4	-0.329816	0.0767331
192.5	-0.430111	0.0900348
192.6	-0.543498	0.104538
192.7	-0.671017	0.119883
192.8	-0.813687	0.135632
192.9	-0.972248	0.151289
193	-1.14747	0.166327
193.1	-1.33995	0.180207
193.2	-1.55011	0.192417
193.3	-1.77823	0.202498
193.4	-2.02422	0.210059
193.5	-2.28795	0.214793
193.6	-2.56906	0.216482
193.7	-2.86702	0.215043
193.8	-3.18117	0.210494
193.9	-3.51052	0.202976
194	-3.85411	0.192728
194.1	-4.21084	0.180099
194.2	-4.5795	0.165549
194.3	-4.95886	0.14959
194.4	-5.34753	0.132744
194.5	-5.74426	0.115496
194.6	-6.14777	0.0983363
194.7	-6.55677	0.081708
194.8	-6.97009	0.0659817
194.9	-7.38648	0.0514816
195	-7.80489	0.038455
195.1	-8.22431	0.0270413
195.2	-8.64376	0.0172985
195.3	-9.06241	0.009205
195.4	-9.47932	0.00265455
195.5	-9.89379	-0.00252084
195.6	-10.3051	-0.00650618
195.7	-10.7127	-0.00948576
195.8	-11.116	-0.0116864
195.9	-11.5143	-0.0133692
196	-11.9073	-0.0147768
196.1	-12.2944	-0.0161031
196.2	-12.6752	-0.0174613
196.3	-13.0493	-0.018905
196.4	-13.4161	-0.0204422
196.5	-13.7752	-0.0220105
196.6	-14.1263	-0.023502
196.7	-14.4688	-0.0247725
196.8	-14.8022	-0.0256045
196.9	-15.1259	-0.0257392
197	-15.4395	-0.0248886
197.1	-15.7422	-0.0227726
197.2	-16.0335	-0.0191404
197.3	-16.3128	-0.0138015
197.4	-16.5793	-0.00659886
197.5	-16.8325	0.00260068
197.6	-17.0717	0.0138914
197.7	-17.2963	0.0272686
197.8	-17.5061	0.042637
197.9	-17.7002	0.0598275
198	-17.8786	0.0786193
198.1	-18.0408	0.0987464
198.2	-18.1867	0.119925
198.3	-18.3163	0.141849
198.4	-18.4295	0.164161
198.5	-18.5267	0.186515
198.6	-18.608	0.208584
198.7	-18.674	0.23007
198.8	-18.725	0.250681
198.9	-18.7615	0.270134
199	-18.7841	0.288177
199.1	-18.7935	0.304597
199.2	-18.7902	0.319188
199.3	-18.7749	0.331783
199.4	-18.7482	0.342223
199.5	-18.7106	0.350343
199.6	-18.6628	0.355998
199.7	-18.6052	0.359046
[truncated: 5,003 more rows]

## Sheet: 16922020.abf
	current (pA)
Time (ms)	30 uM 5-HT	100 uM cocaine
0	-0.209731	-0.177282
0.0996094	-0.202327	-0.173071
0.200195	-0.195025	-0.169423
0.299805	-0.187819	-0.166692
0.400391	-0.180702	-0.165147
0.5	-0.173667	-0.165021
0.599609	-0.166718	-0.166466
0.700195	-0.159861	-0.169558
0.799805	-0.15315	-0.174314
0.900391	-0.14665	-0.180694
1	-0.140481	-0.188585
1.09961	-0.13479	-0.197851
1.2002	-0.129772	-0.208319
1.2998	-0.12566	-0.219768
1.40039	-0.122697	-0.232001
1.5	-0.121126	-0.244805
1.59961	-0.121202	-0.258003
1.7002	-0.123178	-0.271415
1.7998	-0.127266	-0.284889
1.90039	-0.133674	-0.298308
2	-0.142534	-0.311563
2.09961	-0.153921	-0.32457
2.2002	-0.167851	-0.337279
2.2998	-0.184279	-0.349637
2.40039	-0.203099	-0.361592
2.5	-0.224127	-0.373117
2.59961	-0.247117	-0.384172
2.7002	-0.271799	-0.394723
2.7998	-0.297858	-0.404753
2.90039	-0.324942	-0.41421
3	-0.352684	-0.423069
3.09961	-0.380702	-0.431307
3.2002	-0.408624	-0.438924
3.2998	-0.436069	-0.445926
3.40039	-0.462692	-0.452323
3.5	-0.488164	-0.458155
3.59961	-0.512187	-0.46348
3.7002	-0.534492	-0.468377
3.7998	-0.554841	-0.472909
3.90039	-0.573045	-0.477156
4	-0.588979	-0.481186
4.09961	-0.602564	-0.485076
4.2002	-0.613755	-0.488879
4.2998	-0.622571	-0.49264
4.40039	-0.629083	-0.496377
4.5	-0.633404	-0.500085
4.59961	-0.635698	-0.503735
4.7002	-0.636183	-0.507258
4.7998	-0.635097	-0.510592
4.90039	-0.632715	-0.513642
5	-0.629314	-0.516308
5.09961	-0.625188	-0.518499
5.2002	-0.620631	-0.520137
5.2998	-0.615914	-0.521164
5.40039	-0.6113	-0.521548
5.5	-0.606992	-0.521294
5.59961	-0.603161	-0.52042
5.7002	-0.599901	-0.51899
5.7998	-0.59727	-0.517101
5.90039	-0.595243	-0.514872
6	-0.593744	-0.51244
6.09961	-0.592615	-0.509956
6.2002	-0.591647	-0.507552
6.2998	-0.590585	-0.505368
6.40039	-0.589139	-0.503515
6.5	-0.587004	-0.502104
6.59961	-0.583881	-0.501168
6.7002	-0.579459	-0.50073
6.7998	-0.573461	-0.500746
6.90039	-0.565646	-0.501156
7	-0.555847	-0.50186
7.09961	-0.543929	-0.502735
7.2002	-0.529847	-0.503627
7.2998	-0.513652	-0.504379
7.40039	-0.495452	-0.504837
7.5	-0.475435	-0.504868
7.59961	-0.453857	-0.50437
7.7002	-0.431051	-0.503259
7.7998	-0.40738	-0.50151
7.90039	-0.383281	-0.499109
8	-0.359179	-0.4961
8.09961	-0.33553	-0.492571
8.2002	-0.312778	-0.488644
8.2998	-0.291327	-0.484458
8.40039	-0.271569	-0.480187
8.5	-0.253839	-0.476011
8.59961	-0.238455	-0.472094
8.7002	-0.225649	-0.468605
8.7998	-0.215595	-0.465694
8.90039	-0.20839	-0.463495
9	-0.204072	-0.462098
9.09961	-0.202615	-0.461592
9.2002	-0.203949	-0.462012
9.2998	-0.207939	-0.463378
9.40039	-0.214401	-0.465673
9.5	-0.223117	-0.46888
9.59961	-0.233844	-0.472925
9.7002	-0.246296	-0.477762
9.7998	-0.260162	-0.483303
9.90039	-0.275128	-0.48947
10	-0.29089	-0.496181
10.0996	-0.307136	-0.503339
10.2002	-0.323528	-0.510842
10.2998	-0.339754	-0.518579
10.4004	-0.355474	-0.526459
10.5	-0.37039	-0.534364
10.5996	-0.384207	-0.542185
10.7002	-0.396631	-0.549795
10.7998	-0.407386	-0.557071
10.9004	-0.416224	-0.563899
11	-0.422917	-0.570175
11.0996	-0.427258	-0.575801
11.2002	-0.429078	-0.580678
11.2998	-0.428252	-0.584728
11.4004	-0.424682	-0.58788
11.5	-0.418318	-0.5901
11.5996	-0.409136	-0.591375
11.7002	-0.397174	-0.591702
11.7998	-0.382524	-0.591109
11.9004	-0.365317	-0.589642
12	-0.345734	-0.587379
12.0996	-0.323984	-0.584391
12.2002	-0.30033	-0.580773
12.2998	-0.275054	-0.576627
12.4004	-0.248488	-0.572051
12.5	-0.220962	-0.567152
12.5996	-0.192829	-0.561995
12.7002	-0.164433	-0.556634
12.7998	-0.13612	-0.551124
12.9004	-0.108246	-0.545485
13	-0.0811434	-0.539712
13.0996	-0.0551395	-0.533759
13.2002	-0.0305252	-0.527547
13.2998	-0.00756645	-0.520978
13.4004	0.0135098	-0.513947
13.5	0.0325155	-0.506319
13.5996	0.0493155	-0.497948
13.7002	0.0638142	-0.488708
13.7998	0.0759468	-0.478461
13.9004	0.0857019	-0.467113
14	0.0931253	-0.454579
14.0996	0.0983	-0.440813
14.2002	0.101378	-0.425801
14.2998	0.102533	-0.409575
14.4004	0.101979	-0.392207
14.5	0.0999422	-0.373818
14.5996	0.0966892	-0.354572
14.7002	0.0925035	-0.334668
14.7998	0.0876598	-0.314328
14.9004	0.0824232	-0.29381
15	0.0770578	-0.273399
15.0996	0.0718002	-0.253372
15.2002	0.0668774	-0.234028
15.2998	0.0624771	-0.215632
15.4004	0.0587349	-0.198456
15.5	0.0557566	-0.182739
15.5996	0.0535994	-0.168688
15.7002	0.0523024	-0.156492
15.7998	0.051856	-0.146305
15.9004	0.0522089	-0.138252
16	0.0532484	-0.132394
16.0996	0.0548792	-0.128735
16.2002	0.0569553	-0.127234
16.2998	0.0593271	-0.127795
16.4004	0.0618353	-0.130255
16.5	0.0643129	-0.13446
16.5996	0.0666199	-0.140172
16.7002	0.068574	-0.147138
16.7998	0.0700426	-0.155063
16.9004	0.0709095	-0.163643
17	0.0710764	-0.172567
17.0996	0.0704594	-0.181535
17.2002	0.0690136	-0.190256
17.2998	0.0667105	-0.198471
17.4004	0.0635376	-0.205956
17.5	0.0594912	-0.212541
17.5996	0.0545702	-0.218084
17.7002	0.0487947	-0.222509
17.7998	0.042181	-0.22578
17.9004	0.0347652	-0.227933
18	0.0265799	-0.229038
18.0996	0.0176487	-0.22921
18.2002	0.00797176	-0.228583
18.2998	-0.0024538	-0.227306
18.4004	-0.0136395	-0.225555
18.5	-0.0255747	-0.223485
18.5996	-0.0382671	-0.221242
18.7002	-0.0517082	-0.218963
18.7998	-0.0658741	-0.21677
18.9004	-0.0807476	-0.214773
19	-0.0963049	-0.213042
19.0996	-0.112499	-0.211613
19.2002	-0.129275	-0.210497
19.2998	-0.146553	-0.209702
19.4004	-0.164238	-0.209212
19.5	-0.182255	-0.208992
19.5996	-0.200515	-0.208998
19.7002	-0.218939	-0.209184
19.7998	-0.23744	-0.209513
19.9004	-0.255929	-0.209933
20	-0.274336	-0.210413
20.0996	-0.292635	-0.210933
20.2002	-0.310809	-0.211469
20.2998	-0.32884	-0.212028
20.4004	-0.346724	-0.212629
20.5	-0.36447	-0.21331
20.5996	-0.382093	-0.214126
20.7002	-0.399613	-0.215137
20.7998	-0.417032	-0.216415
20.9004	-0.434337	-0.218039
21	-0.451513	-0.220088
21.0996	-0.468522	-0.22266
21.2002	-0.485282	-0.22584
21.2998	-0.501692	-0.229697
21.4004	-0.517636	-0.234267
21.5	-0.532986	-0.239574
21.5996	-0.547592	-0.245615
21.7002	-0.561287	-0.252331
21.7998	-0.573915	-0.259685
21.9004	-0.585339	-0.267581
22	-0.595436	-0.275925
22.0996	-0.604119	-0.284597
22.2002	-0.611319	-0.293461
22.2998	-0.617019	-0.30239
22.4004	-0.621221	-0.311281
22.5	-0.62398	-0.320022
22.5996	-0.625399	-0.32855
22.7002	-0.625622	-0.336813
22.7998	-0.624811	-0.344808
22.9004	-0.62315	-0.352535
23	-0.620832	-0.360046
23.0996	-0.618067	-0.367419
23.2002	-0.615056	-0.374751
23.2998	-0.611991	-0.382152
23.4004	-0.609034	-0.389726
23.5	-0.60633	-0.397577
23.5996	-0.60399	-0.405792
23.7002	-0.602077	-0.414414
23.7998	-0.600636	-0.423429
23.9004	-0.599669	-0.432796
24	-0.59917	-0.442444
24.0996	-0.599113	-0.452242
24.2002	-0.599422	-0.46203
24.2998	-0.600046	-0.471615
24.4004	-0.600926	-0.480754
24.5	-0.602017	-0.489197
24.5996	-0.603292	-0.496709
24.7002	-0.604727	-0.503057
24.7998	-0.606349	-0.50805
24.9004	-0.608213	-0.511517
25	-0.610409	-0.513316
25.0996	-0.613008	-0.513385
25.2002	-0.616131	-0.511724
25.2998	-0.619911	-0.508375
25.4004	-0.624465	-0.503448
25.5	-0.629904	-0.497091
25.5996	-0.636333	-0.489506
25.7002	-0.643809	-0.480925
25.7998	-0.6524	-0.471596
25.9004	-0.662118	-0.461803
26	-0.672933	-0.451825
26.0996	-0.684757	-0.44193
26.2002	-0.697488	-0.432366
26.2998	-0.710962	-0.423359
26.4004	-0.724992	-0.415092
26.5	-0.739366	-0.407737
26.5996	-0.75386	-0.401438
26.7002	-0.768242	-0.396287
26.7998	-0.782299	-0.392358
26.9004	-0.795807	-0.389676
27	-0.80857	-0.388264
27.0996	-0.820419	-0.388133
27.2002	-0.831231	-0.389273
27.2998	-0.840904	-0.391658
27.4004	-0.849366	-0.395251
27.5	-0.856564	-0.399993
27.5996	-0.86248	-0.40583
27.7002	-0.867122	-0.412688
27.7998	-0.870528	-0.420499
27.9004	-0.872726	-0.42916
28	-0.873783	-0.438554
28.0996	-0.873728	-0.448538
28.2002	-0.872634	-0.45895
28.2998	-0.870576	-0.469621
28.4004	-0.867644	-0.480343
28.5	-0.863886	-0.490901
28.5996	-0.859369	-0.501057
28.7002	-0.854166	-0.510568
28.7998	-0.848346	-0.519207
28.9004	-0.841977	-0.526729
29	-0.835117	-0.532901
29.0996	-0.827831	-0.537521
29.2002	-0.820181	-0.540401
29.2998	-0.812219	-0.541386
29.4004	-0.80401	-0.540368
29.5	-0.795591	-0.537284
29.5996	-0.786984	-0.532106
29.7002	-0.778185	-0.524876
29.7998	-0.769197	-0.515667
29.9004	-0.760003	-0.504596
30	-0.750541	-0.491835
30.0996	-0.740775	-0.477592
30.2002	-0.730646	-0.462104
30.2998	-0.720087	-0.445649
30.4004	-0.709036	-0.428514
30.5	-0.697443	-0.411004
30.5996	-0.685263	-0.393431
30.7002	-0.672456	-0.376103
30.7998	-0.659031	-0.359297
30.9004	-0.645028	-0.343265
31	-0.630503	-0.328233
31.0996	-0.615551	-0.314384
31.2002	-0.600316	-0.301848
31.2998	-0.584947	-0.290709
31.4004	-0.569631	-0.281005
31.5	-0.55457	-0.272722
31.5996	-0.539997	-0.265787
31.7002	-0.526129	-0.26012
31.7998	-0.513206	-0.255597
31.9004	-0.501431	-0.252065
32	-0.490982	-0.249358
32.0996	-0.481994	-0.247285
32.2002	-0.474553	-0.245653
32.2998	-0.468716	-0.244297
32.4004	-0.464443	-0.243049
32.5	-0.461641	-0.241778
32.5996	-0.460146	-0.240371
32.7002	-0.459738	-0.238727
32.7998	-0.460153	-0.236764
32.9004	-0.461072	-0.234457
33	-0.462157	-0.231774
33.0996	-0.463045	-0.228723
33.2002	-0.463393	-0.225311
33.2998	-0.462864	-0.221582
33.4004	-0.461169	-0.217573
33.5	-0.458059	-0.213345
33.5996	-0.453355	-0.208962
33.7002	-0.446954	-0.204473
33.7998	-0.438828	-0.199948
33.9004	-0.429056	-0.195457
34	-0.417791	-0.191065
34.0996	-0.40529	-0.186858
34.2002	-0.391854	-0.182926
34.2998	-0.377847	-0.179359
34.4004	-0.363686	-0.17626
34.5	-0.34981	-0.173716
34.5996	-0.336657	-0.171832
34.7002	-0.324651	-0.170696
34.7998	-0.314175	-0.170413
34.9004	-0.305583	-0.171064
35	-0.299155	-0.172722
35.0996	-0.295109	-0.175436
35.2002	-0.29358	-0.179238
35.2998	-0.294633	-0.18413
35.4004	-0.29826	-0.190105
35.5	-0.304384	-0.197103
35.5996	-0.31284	-0.205029
35.7002	-0.323413	-0.213791
35.7998	-0.335853	-0.223237
35.9004	-0.349868	-0.233231
36	-0.365152	-0.243611
36.0996	-0.381392	-0.254235
36.2002	-0.398263	-0.264916
36.2998	-0.415469	-0.275512
36.4004	-0.432738	-0.285904
36.5	-0.449824	-0.29601
36.5996	-0.466508	-0.305773
36.7002	-0.482618	-0.315154
36.7998	-0.498021	-0.324153
36.9004	-0.512608	-0.332794
37	-0.52631	-0.341127
37.0996	-0.53908	-0.34921
37.2002	-0.55087	-0.357118
37.2998	-0.561675	-0.364926
37.4004	-0.571496	-0.3727
37.5	-0.580337	-0.380501
37.5996	-0.588223	-0.38834
37.7002	-0.595166	-0.396208
37.7998	-0.601165	-0.404082
37.9004	-0.606226	-0.411921
38	-0.610366	-0.419648
38.0996	-0.613599	-0.427166
38.2002	-0.615928	-0.434368
38.2998	-0.617358	-0.441146
38.4004	-0.617896	-0.447404
38.5	-0.617558	-0.453052
38.5996	-0.61638	-0.458026
38.7002	-0.614417	-0.462288
38.7998	-0.611733	-0.465853
38.9004	-0.608401	-0.468774
39	-0.604531	-0.471132
39.0996	-0.600262	-0.473055
39.2002	-0.595734	-0.474703
39.2998	-0.591119	-0.47626
39.4004	-0.58658	-0.477928
39.5	-0.582302	-0.479935
39.5996	-0.578445	-0.482479
39.7002	-0.575183	-0.485756
39.7998	-0.572697	-0.489944
39.9004	-0.571131	-0.495197
40	-0.570613	-0.501624
40.0996	-0.571235	-0.509287
40.2002	-0.573045	-0.518217
40.2998	-0.576044	-0.528381
40.4004	-0.58021	-0.539687
40.5	-0.585485	-0.552006
40.5996	-0.591777	-0.565209
40.7002	-0.598944	-0.579123
40.7998	-0.606802	-0.593572
40.9004	-0.615153	-0.608336
41	-0.623809	-0.62323
41.0996	-0.632574	-0.638078
41.2002	-0.641273	-0.65269
41.2998	-0.64973	-0.666903
41.4004	-0.657798	-0.680586
41.5	-0.665373	-0.693635
41.5996	-0.672377	-0.705979
41.7002	-0.6788	-0.717577
41.7998	-0.684647	-0.728392
41.9004	-0.689945	-0.738407
42	-0.694747	-0.747619
42.0996	-0.699132	-0.75603
42.2002	-0.703197	-0.763655
42.2998	-0.707052	-0.770505
42.4004	-0.710801	-0.776589
42.5	-0.714531	-0.781907
42.5996	-0.718323	-0.786438
42.7002	-0.722233	-0.790159
42.7998	-0.726308	-0.793035
42.9004	-0.730579	-0.795012
43	-0.735058	-0.796
43.0996	-0.739755	-0.795896
43.2002	-0.744659	-0.794589
43.2998	-0.749755	-0.791963
43.4004	-0.75504	-0.78786
43.5	-0.760509	-0.78214
43.5996	-0.76616	-0.774664
43.7002	-0.771996	-0.76528
43.7998	-0.778021	-0.753857
43.9004	-0.784243	-0.740316
44	-0.790659	-0.724579
44.0996	-0.797257	-0.706623
44.2002	-0.804	-0.686496
44.2998	-0.810862	-0.664287
44.4004	-0.817807	-0.640159
44.5	-0.824773	-0.614316
44.5996	-0.83167	-0.587058
44.7002	-0.838403	-0.558738
44.7998	-0.844879	-0.52976
44.9004	-0.850988	-0.500566
45	-0.856629	-0.471617
45.0996	-0.8617	-0.443394
45.2002	-0.8661	-0.416354
45.2998	-0.869756	-0.390937
45.4004	-0.872606	-0.367543
45.5	-0.874601	-0.346518
45.5996	-0.875726	-0.328135
45.7002	-0.875999	-0.312594
45.7998	-0.875436	-0.300006
45.9004	-0.87408	-0.290408
46	-0.871996	-0.283772
46.0996	-0.869271	-0.28
46.2002	-0.866	-0.27892
46.2998	-0.862274	-0.280303
46.4004	-0.858192	-0.283892
46.5	-0.85384	-0.289401
46.5996	-0.849298	-0.296522
46.7002	-0.844618	-0.304935
46.7998	-0.83985	-0.314324
46.9004	-0.835027	-0.324374
47	-0.830156	-0.334817
47.0996	-0.825227	-0.345395
47.2002	-0.820225	-0.35588
47.2998	-0.815152	-0.36606
47.4004	-0.809999	-0.375786
47.5	-0.804763	-0.384907
47.5996	-0.799452	-0.393326
47.7002	-0.794084	-0.400954
47.7998	-0.788676	-0.407741
47.9004	-0.783258	-0.413636
48	-0.777909	-0.418633
48.0996	-0.772738	-0.422736
48.2002	-0.767851	-0.425934
48.2998	-0.763376	-0.428227
48.4004	-0.759432	-0.429613
48.5	-0.756134	-0.430076
48.5996	-0.753589	-0.429578
48.7002	-0.751906	-0.428072
48.7998	-0.751154	-0.425509
48.9004	-0.75138	-0.421846
49	-0.752595	-0.417008
49.0996	-0.754758	-0.410912
49.2002	-0.757792	-0.403483
49.2998	-0.761595	-0.39467
49.4004	-0.76601	-0.384433
49.5	-0.770855	-0.37275
49.5996	-0.775901	-0.359649
49.7002	-0.780908	-0.34519
49.7998	-0.785595	-0.329488
49.9004	-0.789705	-0.312701
50	-0.792971	-0.295041
50.0996	-0.795127	-0.276752
50.2002	-0.795936	-0.258139
50.2998	-0.795165	-0.239513
50.4004	-0.792648	-0.221238
50.5	-0.788263	-0.20368
50.5996	-0.781938	-0.187213
50.7002	-0.773663	-0.17217
50.7998	-0.763486	-0.158865
50.9004	-0.751514	-0.147571
51	-0.737906	-0.138517
51.0996	-0.7229	-0.131867
51.2002	-0.706785	-0.127706
51.2998	-0.689893	-0.126052
51.4004	-0.672565	-0.126841
51.5	-0.655165	-0.12995
51.5996	-0.638077	-0.135194
51.7002	-0.621653	-0.14234
51.7998	-0.606225	-0.151103
51.9004	-0.592091	-0.161167
52	-0.579483	-0.1722
52.0996	-0.568563	-0.183858
52.2002	-0.559452	-0.195791
52.2998	-0.552183	-0.207691
52.4004	-0.546738	-0.219256
52.5	-0.543011	-0.230241
52.5996	-0.54087	-0.240411
52.7002	-0.540115	-0.24958
52.7998	-0.540527	-0.257602
52.9004	-0.541864	-0.26438
53	-0.543865	-0.269858
53.0996	-0.546307	-0.273998
53.2002	-0.54898	-0.276823
53.2998	-0.551701	-0.278372
53.4004	-0.554316	-0.27873
53.5	-0.556718	-0.277995
53.5996	-0.558843	-0.276321
53.7002	-0.56067	-0.273853
53.7998	-0.562194	-0.270743
53.9004	-0.563452	-0.267152
54	-0.564504	-0.263227
54.0996	-0.565413	-0.259133
54.2002	-0.566243	-0.25502
54.2998	-0.567062	-0.250994
54.4004	-0.567889	-0.247138
54.5	-0.568748	-0.243492
54.5996	-0.56963	-0.240051
54.7002	-0.5705	-0.236764
54.7998	-0.571303	-0.233522
54.9004	-0.571967	-0.230149
55	-0.572424	-0.226427
55.0996	-0.572572	-0.222113
55.2002	-0.572326	-0.216915
55.2998	-0.571605	-0.210552
55.4004	-0.570356	-0.202732
55.5	-0.568538	-0.193214
55.5996	-0.566161	-0.181781
55.7002	-0.56329	-0.168298
55.7998	-0.560014	-0.152697
55.9004	-0.556454	-0.134995
56	-0.552773	-0.115306
56.0996	-0.549147	-0.0938311
56.2002	-0.545795	-0.0708733
56.2998	-0.542936	-0.0468378
56.4004	-0.540797	-0.0221882
56.5	-0.53959	0.00256538
56.5996	-0.539496	0.0268993
56.7002	-0.540673	0.0502853
56.7998	-0.543241	0.0721951
56.9004	-0.547261	0.092164
57	-0.552735	0.109795
57.0996	-0.559608	0.124763
57.2002	-0.56775	0.136841
57.2998	-0.576982	0.145905
57.4004	-0.587074	0.15194
57.5	-0.597769	0.155014
57.5996	-0.608751	0.155298
57.7002	-0.619696	0.153011
57.7998	-0.630268	0.148441
57.9004	-0.640158	0.141888
58	-0.649062	0.133663
58.0996	-0.656741	0.124074
58.2002	-0.663001	0.113423
58.2998	-0.667716	0.101933
58.4004	-0.670816	0.0898113
58.5	-0.672291	0.0772257
58.5996	-0.672229	0.0642776
58.7002	-0.67076	0.051012
58.7998	-0.668077	0.0374413
58.9004	-0.664402	0.0235586
59	-0.660002	0.00932789
59.0996	-0.655134	-0.00530148
59.2002	-0.650041	-0.0203676
59.2998	-0.644955	-0.0358925
59.4004	-0.640089	-0.0518761
59.5	-0.635583	-0.0682678
59.5996	-0.631527	-0.0850286
59.7002	-0.627951	-0.102048
59.7998	-0.624841	-0.119204
59.9004	-0.622103	-0.136337
60	-0.619625	-0.153255
60.0996	-0.617266	-0.169756
60.2002	-0.614818	-0.185659
60.2998	-0.612105	-0.200751
60.4004	-0.608933	-0.21483
60.5	-0.60515	-0.227715
60.5996	-0.600612	-0.239247
60.7002	-0.595245	-0.249296
60.7998	-0.589024	-0.257761
60.9004	-0.581983	-0.264582
61	-0.574261	-0.269723
61.0996	-0.566016	-0.273206
61.2002	-0.557483	-0.275071
61.2998	-0.548957	-0.275402
61.4004	-0.540775	-0.274289
61.5	-0.53331	-0.271871
61.5996	-0.526952	-0.268298
61.7002	-0.522078	-0.263746
61.7998	-0.519071	-0.258402
61.9004	-0.518277	-0.252455
62	-0.519983	-0.246071
62.0996	-0.524414	-0.239409
62.2002	-0.531752	-0.232648
62.2998	-0.54209	-0.225966
62.4004	-0.555447	-0.219499
62.5	-0.571754	-0.213386
62.5996	-0.590874	-0.207764
62.7002	-0.612604	-0.202772
62.7998	-0.636672	-0.198529
62.9004	-0.662756	-0.195152
63	-0.6905	-0.192749
63.0996	-0.719525	-0.191422
63.2002	-0.749459	-0.191243
63.2998	-0.779898	-0.192262
63.4004	-0.810472	-0.194517
63.5	-0.840823	-0.198011
63.5996	-0.8706	-0.202693
63.7002	-0.899468	-0.2085
63.7998	-0.927126	-0.215303
63.9004	-0.953303	-0.222943
64	-0.977777	-0.231201
64.0996	-1.00036	-0.239829
64.2002	-1.02089	-0.248529
64.2998	-1.03924	-0.257017
64.4004	-1.05531	-0.26497
64.5	-1.06903	-0.272063
64.5996	-1.0804	-0.277997
64.7002	-1.08942	-0.282505
64.7998	-1.09617	-0.285337
64.9004	-1.10072	-0.286325
65	-1.10323	-0.28533
65.0996	-1.1039	-0.282294
65.2002	-1.10294	-0.277184
65.2998	-1.10061	-0.270037
65.4004	-1.0972	-0.260936
65.5	-1.09299	-0.250012
65.5996	-1.08832	-0.237427
65.7002	-1.08348	-0.223342
65.7998	-1.07879	-0.207932
65.9004	-1.0745	-0.191355
66	-1.07086	-0.173782
66.0996	-1.06808	-0.155358
66.2002	-1.06632	-0.136188
66.2998	-1.06568	-0.116347
66.4004	-1.06624	-0.0959091
66.5	-1.06804	-0.0749197
66.5996	-1.07102	-0.0534191
66.7002	-1.0751	-0.0314217
66.7998	-1.08015	-0.00894737
66.9004	-1.08602	0.0139761
67	-1.09254	0.037323
67.0996	-1.09952	0.061038
67.2002	-1.10676	0.0850554
67.2998	-1.11403	0.109282
67.4004	-1.12111	0.133595
67.5	-1.12781	0.157858
67.5996	-1.13394	0.181918
67.7002	-1.13932	0.205612
67.7998	-1.1438	0.228762
67.9004	-1.14725	0.251181
68	-1.14954	0.272703
68.0996	-1.15057	0.293177
68.2002	-1.15028	0.312454
68.2998	-1.14858	0.33041
68.4004	-1.14544	0.346942
68.5	-1.14085	0.361961
68.5996	-1.13477	0.375416
68.7002	-1.12722	0.387271
68.7998	-1.11819	0.397535
68.9004	-1.10771	0.406221
69	-1.09578	0.413386
69.0996	-1.08246	0.419071
69.2002	-1.06782	0.423361
69.2998	-1.05194	0.426328
69.4004	-1.03493	0.428059
69.5	-1.01689	0.428658
69.5996	-0.99798	0.428223
69.7002	-0.97837	0.426876
69.7998	-0.958247	0.424713
69.9004	-0.937809	0.42181
70	-0.91727	0.41826
70.0996	-0.896855	0.414138
70.2002	-0.876778	0.40951
70.2998	-0.857269	0.404408
70.4004	-0.838536	0.398846
70.5	-0.820769	0.392807
70.5996	-0.804111	0.386262
70.7002	-0.788656	0.379154
70.7998	-0.774493	0.371367
70.9004	-0.761645	0.362762
71	-0.750108	0.35318
71.0996	-0.739814	0.342446
71.2002	-0.730654	0.330357
71.2998	-0.722498	0.316738
71.4004	-0.715191	0.301424
71.5	-0.708553	0.284272
71.5996	-0.70239	0.265165
71.7002	-0.696502	0.244052
71.7998	-0.690684	0.220947
71.9004	-0.684749	0.195951
72	-0.678502	0.169237
72.0996	-0.67178	0.141053
72.2002	-0.664446	0.111737
72.2998	-0.656374	0.0817108
72.4004	-0.647464	0.0514507
72.5	-0.637631	0.021471
72.5996	-0.62683	-0.00768852
72.7002	-0.615016	-0.0354605
72.7998	-0.602195	-0.0613108
72.9004	-0.588368	-0.0847158
73	-0.573564	-0.105224
73.0996	-0.557854	-0.122463
73.2002	-0.541308	-0.136145
73.2998	-0.524043	-0.146064
73.4004	-0.506188	-0.152113
73.5	-0.487919	-0.154282
73.5996	-0.46943	-0.152667
73.7002	-0.450945	-0.14747
73.7998	-0.432695	-0.138989
73.9004	-0.414944	-0.127559
74	-0.397952	-0.113574
74.0996	-0.382004	-0.0974846
74.2002	-0.367356	-0.0797663
74.2998	-0.354269	-0.0609188
74.4004	-0.34297	-0.0414448
74.5	-0.333667	-0.0218248
74.5996	-0.326549	-0.00253487
74.7002	-0.321746	0.015975
74.7998	-0.319372	0.0332747
74.9004	-0.319449	0.048996
75	-0.321975	0.0627813
75.0996	-0.32688	0.0743608
75.2002	-0.334085	0.0835104
75.2998	-0.343451	0.090064
75.4004	-0.354799	0.0939445
75.5	-0.367904	0.095129
75.5996	-0.382519	0.0936813
75.7002	-0.398363	0.0897169
75.7998	-0.415135	0.083436
75.9004	-0.43253	0.0750799
76	-0.450251	0.0649719
76.0996	-0.467991	0.0534601
76.2002	-0.485447	0.0409288
76.2998	-0.502347	0.0277443
76.4004	-0.518423	0.0142908
76.5	-0.533444	0.000904083
76.5996	-0.547224	-0.0121002
76.7002	-0.55959	-0.0244722
76.7998	-0.570425	-0.0360298
76.9004	-0.579638	-0.0466785
77	-0.587185	-0.0563831
77.0996	-0.59306	-0.0651875
77.2002	-0.597283	-0.0732088
77.2998	-0.599921	-0.0806246
77.4004	-0.60105	-0.0876722
77.5	-0.600797	-0.0946131
77.5996	-0.599296	-0.101729
77.7002	-0.5967	-0.109299
77.7998	-0.593168	-0.117573
77.9004	-0.588849	-0.126757
78	-0.583919	-0.136993
78.0996	-0.578516	-0.148386
78.2002	-0.572783	-0.160963
78.2998	-0.566858	-0.174689
78.4004	-0.560868	-0.189476
78.5	-0.554936	-0.205154
78.5996	-0.549188	-0.221523
78.7002	-0.543729	-0.238357
78.7998	-0.538658	-0.255387
78.9004	-0.534073	-0.272364
79	-0.530058	-0.289027
79.0996	-0.526711	-0.305154
79.2002	-0.524133	-0.320545
79.2998	-0.522411	-0.335068
79.4004	-0.52164	-0.348632
79.5	-0.521902	-0.361202
79.5996	-0.523267	-0.372766
79.7002	-0.525833	-0.383376
79.7998	-0.52967	-0.393115
79.9004	-0.53482	-0.402086
80	-0.541324	-0.41042
80.0996	-0.54919	-0.418229
80.2002	-0.558416	-0.425645
80.2998	-0.568979	-0.432756
80.4004	-0.580847	-0.439649
80.5	-0.593969	-0.446362
80.5996	-0.608247	-0.452903
80.7002	-0.623568	-0.459231
80.7998	-0.639795	-0.465275
80.9004	-0.656782	-0.47093
81	-0.674379	-0.476057
81.0996	-0.692413	-0.480518
81.2002	-0.710723	-0.484149
81.2998	-0.729151	-0.486797
81.4004	-0.747521	-0.488323
81.5	-0.76566	-0.488588
81.5996	-0.78342	-0.487486
81.7002	-0.800656	-0.484957
81.7998	-0.817237	-0.480985
81.9004	-0.833061	-0.475588
82	-0.848027	-0.468835
82.0996	-0.862041	-0.460852
82.2002	-0.875031	-0.451804
82.2998	-0.886932	-0.441899
82.4004	-0.897681	-0.431372
82.5	-0.90723	-0.420497
82.5996	-0.915529	-0.40956
82.7002	-0.922537	-0.398861
82.7998	-0.928216	-0.388706
82.9004	-0.932529	-0.379382
83	-0.935451	-0.3712
83.0996	-0.936941	-0.364424
83.2002	-0.936984	-0.359307
83.2998	-0.935537	-0.35606
83.4004	-0.93259	-0.354872
83.5	-0.928125	-0.355888
83.5996	-0.922132	-0.359209
83.7002	-0.914593	-0.364883
83.7998	-0.905506	-0.372918
83.9004	-0.894838	-0.383277
84	-0.882575	-0.395891
84.0996	-0.868694	-0.410641
84.2002	-0.853186	-0.427353
84.2998	-0.83603	-0.445838
84.4004	-0.817206	-0.465864
84.5	-0.796721	-0.487188
84.5996	-0.774605	-0.509515
84.7002	-0.750895	-0.53254
84.7998	-0.725677	-0.555964
84.9004	-0.699086	-0.579457
85	-0.671297	-0.602714
85.0996	-0.642525	-0.625427
85.2002	-0.613046	-0.647317
85.2998	-0.583195	-0.668105
85.4004	-0.553335	-0.687552
85.5	-0.523903	-0.705438
85.5996	-0.495323	-0.721579
85.7002	-0.468066	-0.735827
85.7998	-0.442614	-0.748057
85.9004	-0.419415	-0.758169
86	-0.398895	-0.76612
86.0996	-0.381429	-0.77187
86.2002	-0.367332	-0.775401
86.2998	-0.356837	-0.776718
86.4004	-0.350087	-0.77585
86.5	-0.347116	-0.772839
86.5996	-0.347886	-0.767741
86.7002	-0.352245	-0.760624
86.7998	-0.359954	-0.75157
86.9004	-0.370701	-0.740676
87	-0.384108	-0.728061
87.0996	-0.399738	-0.71387
87.2002	-0.417108	-0.698238
87.2998	-0.435728	-0.68132
87.4004	-0.455092	-0.663287
87.5	-0.474719	-0.644333
87.5996	-0.494147	-0.624679
87.7002	-0.51294	-0.60457
87.7998	-0.530737	-0.584247
87.9004	-0.547218	-0.563953
88	-0.56214	-0.543921
88.0996	-0.575312	-0.524377
88.2002	-0.586593	-0.505535
88.2998	-0.595881	-0.487572
88.4004	-0.603115	-0.470618
88.5	-0.608272	-0.454786
88.5996	-0.61134	-0.440136
88.7002	-0.612353	-0.426697
88.7998	-0.611329	-0.41442
88.9004	-0.608287	-0.403216
89	-0.603255	-0.392952
89.0996	-0.596259	-0.383474
89.2002	-0.587349	-0.374574
89.2998	-0.57658	-0.366036
89.4004	-0.564032	-0.357642
89.5	-0.549815	-0.349186
89.5996	-0.534049	-0.340456
89.7002	-0.516887	-0.331277
89.7998	-0.498533	-0.321497
89.9004	-0.479221	-0.311024
90	-0.459214	-0.299804
90.0996	-0.438788	-0.287844
90.2002	-0.418244	-0.275202
90.2998	-0.397887	-0.261991
90.4004	-0.378016	-0.248372
90.5	-0.358894	-0.234529
90.5996	-0.340757	-0.220691
90.7002	-0.32379	-0.207113
90.7998	-0.308136	-0.194058
90.9004	-0.29388	-0.181769
91	-0.281047	-0.170501
91.0996	-0.269625	-0.160484
91.2002	-0.25955	-0.151938
91.2998	-0.250751	-0.145037
91.4004	-0.243104	-0.13991
91.5	-0.236488	-0.13665
91.5996	-0.230772	-0.135315
91.7002	-0.22586	-0.135922
91.7998	-0.221663	-0.138424
91.9004	-0.218139	-0.142746
92	-0.215268	-0.148773
92.0996	-0.213058	-0.156363
92.2002	-0.211516	-0.165348
92.2998	-0.210704	-0.175533
92.4004	-0.210667	-0.186692
92.5	-0.211464	-0.198586
92.5996	-0.213134	-0.210975
92.7002	-0.215714	-0.223638
92.7998	-0.219183	-0.236327
92.9004	-0.223515	-0.248827
93	-0.228642	-0.260896
93.0996	-0.234474	-0.272333
93.2002	-0.240874	-0.282948
93.2998	-0.247684	-0.292564
93.4004	-0.254716	-0.301032
93.5	-0.261759	-0.308215
93.5996	-0.268633	-0.314006
93.7002	-0.275144	-0.318326
93.7998	-0.281116	-0.32114
93.9004	-0.286417	-0.322414
94	-0.29092	-0.322165
94.0996	-0.294514	-0.320415
94.2002	-0.297112	-0.317226
94.2998	-0.298653	-0.312662
94.4004	-0.299111	-0.306817
94.5	-0.298483	-0.299797
94.5996	-0.296776	-0.29174
94.7002	-0.294007	-0.282785
94.7998	-0.290199	-0.273089
94.9004	-0.285389	-0.262815
95	-0.279597	-0.252116
95.0996	-0.272871	-0.241158
95.2002	-0.265274	-0.230117
95.2998	-0.256861	-0.219172
95.4004	-0.247724	-0.208467
95.5	-0.237946	-0.198132
95.5996	-0.227648	-0.188298
95.7002	-0.216996	-0.179048
95.7998	-0.206145	-0.170466
95.9004	-0.195289	-0.162632
96	-0.18463	-0.155596
96.0996	-0.174419	-0.149408
96.2002	-0.164907	-0.144065
96.2998	-0.156346	-0.139592
96.4004	-0.148972	-0.135994
96.5	-0.143007	-0.133287
96.5996	-0.138649	-0.131467
96.7002	-0.136074	-0.130552
96.7998	-0.135401	-0.130554
96.9004	-0.136705	-0.131508
97	-0.140008	-0.133445
97.0996	-0.145267	-0.136395
97.2002	-0.152411	-0.140404
97.2998	-0.161321	-0.145513
97.4004	-0.171852	-0.151755
97.5	-0.183827	-0.159153
97.5996	-0.197069	-0.16771
97.7002	-0.211377	-0.177431
97.7998	-0.226564	-0.188292
97.9004	-0.242444	-0.200248
98	-0.258871	-0.213223
98.0996	-0.275722	-0.227115
98.2002	-0.29287	-0.241788
98.2998	-0.310247	-0.257096
98.4004	-0.327791	-0.272872
98.5	-0.345471	-0.288941
98.5996	-0.363248	-0.305102
98.7002	-0.381096	-0.321139
98.7998	-0.398992	-0.336832
98.9004	-0.416924	-0.351983
99	-0.434865	-0.366392
99.0996	-0.452781	-0.379863
99.2002	-0.470623	-0.392226
99.2998	-0.488358	-0.403338
99.4004	-0.505933	-0.413092
99.5	-0.52332	-0.421405
99.5996	-0.540463	-0.42827
99.7002	-0.557321	-0.433727
99.7998	-0.573847	-0.437872
99.9004	-0.590009	-0.440839
100	-0.605763	-0.442818
100.1	-0.621103	-0.444046
100.2	-0.635992	-0.444803
100.3	-0.650383	-0.445395
100.4	-0.664235	-0.446155
100.5	-0.677482	-0.447419
100.6	-0.690029	-0.449489
100.7	-0.701782	-0.452641
100.8	-0.712612	-0.457094
100.9	-0.722397	-0.463032
101	-0.730986	-0.470573
101.1	-0.73823	-0.479774
101.2	-0.743994	-0.490596
101.3	-0.748151	-0.502962
101.4	-0.750608	-0.516731
101.5	-0.751298	-0.531727
101.6	-0.750186	-0.547705
101.7	-0.74729	-0.564404
101.8	-0.742676	-0.581553
101.9	-0.736477	-0.5989
102	-0.728872	-0.616188
102.1	-0.720114	-0.633201
102.2	-0.710497	-0.649764
102.3	-0.700361	-0.665735
102.4	-0.690075	-0.681023
102.5	-0.680019	-0.695552
102.6	-0.670594	-0.709285
102.7	-0.662192	-0.722196
102.8	-0.655211	-0.734277
102.9	-0.650027	-0.745517
103	-0.646954	-0.75591
103.1	-0.646284	-0.765428
103.2	-0.648231	-0.774007
103.3	-0.652955	-0.781593
103.4	-0.660546	-0.788099
103.5	-0.671019	-0.793399
103.6	-0.684278	-0.797316
103.7	-0.700166	-0.799686
103.8	-0.718431	-0.800293
103.9	-0.738756	-0.798926
104	-0.760729	-0.795361
104.1	-0.783871	-0.789385
104.2	-0.807648	-0.780807
104.3	-0.831495	-0.769433
104.4	-0.854848	-0.755137
104.5	-0.877114	-0.737809
104.6	-0.897734	-0.7174
104.7	-0.916169	-0.693924
104.8	-0.931951	-0.66744
104.9	-0.944702	-0.638098
105	-0.954136	-0.606102
105.1	-0.960074	-0.571733
105.2	-0.962442	-0.53532
105.3	-0.961288	-0.497272
105.4	-0.956781	-0.458027
105.5	-0.949183	-0.418084
105.6	-0.938841	-0.377983
105.7	-0.926172	-0.33828
105.8	-0.911644	-0.299542
105.9	-0.895761	-0.26231
106	-0.879025	-0.227111
106.1	-0.861919	-0.19444
106.2	-0.844909	-0.164729
106.3	-0.828379	-0.138327
106.4	-0.812643	-0.115518
106.5	-0.797942	-0.0964861
106.6	-0.784449	-0.0813274
106.7	-0.772235	-0.0700378
106.8	-0.761312	-0.0624962
106.9	-0.751592	-0.0584717
107	-0.742962	-0.0576553
107.1	-0.73525	-0.0596533
107.2	-0.728234	-0.0640364
107.3	-0.721686	-0.0702868
107.4	-0.715378	-0.0778694
107.5	-0.709062	-0.0862551
107.6	-0.70251	-0.0949001
107.7	-0.695539	-0.103302
107.8	-0.687966	-0.11101
107.9	-0.679665	-0.117635
108	-0.670533	-0.122857
108.1	-0.660507	-0.126443
108.2	-0.64958	-0.128216
108.3	-0.637783	-0.128098
108.4	-0.625197	-0.126068
108.5	-0.611926	-0.12219
108.6	-0.598125	-0.116597
108.7	-0.583987	-0.109448
108.8	-0.569729	-0.100935
108.9	-0.55558	-0.0912743
109	-0.541782	-0.0806818
109.1	-0.528595	-0.0693655
109.2	-0.516273	-0.0575151
109.3	-0.505071	-0.0453196
109.4	-0.495218	-0.0329561
109.5	-0.486933	-0.0205641
109.6	-0.480395	-0.00828457
109.7	-0.475739	0.00376701
109.8	-0.473058	0.0154905
109.9	-0.472402	0.0268049
110	-0.473767	0.0376139
110.1	-0.477097	0.0478506
110.2	-0.482278	0.0574265
110.3	-0.489135	0.0662832
110.4	-0.497452	0.074338
110.5	-0.506977	0.0815268
110.6	-0.517425	0.0878172
110.7	-0.528476	0.0931683
110.8	-0.539786	0.0975494
110.9	-0.551024	0.100964
111	-0.561858	0.10345
111.1	-0.57198	0.105085
111.2	-0.58111	0.105963
111.3	-0.589001	0.106223
111.4	-0.595467	0.106033
111.5	-0.600386	0.10556
111.6	-0.603708	0.104983
111.7	-0.605436	0.104506
111.8	-0.605665	0.104321
111.9	-0.604548	0.104605
112	-0.60232	0.105504
112.1	-0.599257	0.107132
112.2	-0.59567	0.109562
112.3	-0.591886	0.112818
112.4	-0.58824	0.116862
112.5	-0.585055	0.121591
112.6	-0.582604	0.126871
112.7	-0.581145	0.132483
112.8	-0.580871	0.138196
112.9	-0.581885	0.143742
113	-0.584219	0.148835
113.1	-0.587832	0.153171
113.2	-0.592596	0.156471
113.3	-0.598311	0.158481
113.4	-0.60473	0.158988
113.5	-0.611564	0.157832
113.6	-0.618466	0.154917
113.7	-0.62511	0.150225
113.8	-0.631166	0.143805
113.9	-0.636315	0.135765
114	-0.640291	0.12628
114.1	-0.642879	0.11557
114.2	-0.643933	0.103908
114.3	-0.643363	0.0916281
114.4	-0.64117	0.0790834
114.5	-0.637396	0.0666323
114.6	-0.632159	0.0546236
114.7	-0.625606	0.0433979
114.8	-0.617929	0.0332479
114.9	-0.609356	0.024437
115	-0.600108	0.0171652
115.1	-0.590418	0.01159
115.2	-0.580504	0.00782394
115.3	-0.570571	0.00589943
115.4	-0.560807	0.00578976
115.5	-0.55136	0.00741863
115.6	-0.542363	0.0106401
115.7	-0.533908	0.0152683
115.8	-0.526059	0.0210428
115.9	-0.518856	0.0276852
116	-0.512339	0.0348701
116.1	-0.506509	0.0422535
116.2	-0.501364	0.049468
116.3	-0.496904	0.0561562
116.4	-0.493112	0.0619698
116.5	-0.489954	0.0665636
116.6	-0.487406	0.0696383
116.7	-0.485424	0.0709066
116.8	-0.483953	0.0701447
116.9	-0.482942	0.0671635
117	-0.482308	0.061841
117.1	-0.481969	0.0540991
117.2	-0.481816	0.0439272
117.3	-0.481738	0.0313921
117.4	-0.481603	0.0166149
117.5	-0.481268	-0.000236511
117.6	-0.480586	-0.01894
117.7	-0.479421	-0.0392199
117.8	-0.477613	-0.0607653
117.9	-0.475034	-0.0832329
118	-0.471547	-0.106271
118.1	-0.467032	-0.129506
118.2	-0.461412	-0.152578
118.3	-0.454629	-0.175127
118.4	-0.446639	-0.196828
118.5	-0.437426	-0.217367
118.6	-0.427007	-0.236504
118.7	-0.415418	-0.254009
118.8	-0.402751	-0.269732
118.9	-0.389098	-0.28356
119	-0.374587	-0.295463
119.1	-0.359361	-0.305467
119.2	-0.343586	-0.31367
119.3	-0.327452	-0.320214
119.4	-0.311138	-0.325297
119.5	-0.29484	-0.329177
119.6	-0.278749	-0.332114
119.7	-0.263056	-0.334413
119.8	-0.247926	-0.33637
119.9	-0.233523	-0.338286
120	-0.219999	-0.340457
120.1	-0.207521	-0.343126
120.2	-0.196232	-0.346513
120.3	-0.186278	-0.35076
120.4	-0.177771	-0.355974
120.5	-0.170815	-0.362178
120.6	-0.165542	-0.369368
120.7	-0.162054	-0.377445
120.8	-0.160457	-0.386278
120.9	-0.160841	-0.395685
121	-0.163295	-0.405457
121.1	-0.167894	-0.415356
121.2	-0.174705	-0.42514
121.3	-0.183757	-0.434579
121.4	-0.195045	-0.443473
121.5	-0.208556	-0.451655
121.6	-0.224231	-0.459012
121.7	-0.241979	-0.46548
121.8	-0.261666	-0.471087
121.9	-0.28312	-0.475904
122	-0.306131	-0.480067
122.1	-0.33047	-0.483772
122.2	-0.355858	-0.487273
122.3	-0.382034	-0.49088
122.4	-0.408699	-0.494906
122.5	-0.435575	-0.499693
122.6	-0.462384	-0.505561
122.7	-0.488854	-0.512826
122.8	-0.514757	-0.521742
122.9	-0.539874	-0.532526
123	-0.564039	-0.545341
123.1	-0.587136	-0.560242
123.2	-0.609082	-0.57722
123.3	-0.629827	-0.596175
123.4	-0.649353	-0.616932
123.5	-0.667703	-0.639231
123.6	-0.684929	-0.662734
123.7	-0.701122	-0.687053
123.8	-0.716401	-0.711739
123.9	-0.730904	-0.73632
124	-0.744776	-0.760319
124.1	-0.758147	-0.783262
124.2	-0.771156	-0.804699
124.3	-0.783931	-0.824221
124.4	-0.796557	-0.841454
124.5	-0.809112	-0.856127
124.6	-0.821609	-0.868041
124.7	-0.834044	-0.877072
124.8	-0.846365	-0.883184
124.9	-0.85847	-0.886448
125	-0.87022	-0.886979
125.1	-0.881417	-0.885015
125.2	-0.891804	-0.880824
125.3	-0.9011	-0.874743
125.4	-0.909007	-0.867126
125.5	-0.915197	-0.858344
125.6	-0.919324	-0.848754
125.7	-0.921079	-0.838714
125.8	-0.920142	-0.828527
125.9	-0.916264	-0.818456
126	-0.909222	-0.808688
126.1	-0.89887	-0.799348
126.2	-0.885134	-0.790487
126.3	-0.868025	-0.782063
126.4	-0.847657	-0.77398
126.5	-0.824252	-0.766068
126.6	-0.7981	-0.758113
126.7	-0.769598	-0.749868
126.8	-0.739197	-0.741061
126.9	-0.707432	-0.731413
127	-0.674896	-0.720643
127.1	-0.642212	-0.708513
127.2	-0.610016	-0.694803
127.3	-0.578939	-0.679349
127.4	-0.549602	-0.66205
127.5	-0.52256	-0.642864
127.6	-0.498334	-0.621806
127.7	-0.477366	-0.598955
127.8	-0.460028	-0.574451
127.9	-0.446592	-0.548483
128	-0.437227	-0.521275
128.1	-0.432005	-0.493109
128.2	-0.430901	-0.46427
128.3	-0.433805	-0.435058
128.4	-0.440559	-0.405755
128.5	-0.450886	-0.376662
128.6	-0.464436	-0.348065
128.7	-0.480796	-0.320245
128.8	-0.499528	-0.293431
128.9	-0.520175	-0.267826
129	-0.54225	-0.243619
129.1	-0.565262	-0.220958
129.2	-0.588723	-0.199978
129.3	-0.61216	-0.180773
129.4	-0.635119	-0.163407
129.5	-0.657167	-0.147904
129.6	-0.677886	-0.134253
129.7	-0.696906	-0.12242
129.8	-0.7139	-0.112333
129.9	-0.728583	-0.103891
130	-0.740725	-0.0969648
130.1	-0.750127	-0.091382
130.2	-0.75664	-0.086957
130.3	-0.760149	-0.0834713
130.4	-0.760583	-0.080718
130.5	-0.757919	-0.0784426
130.6	-0.752184	-0.0763683
130.7	-0.743442	-0.0742245
130.8	-0.731788	-0.0717545
130.9	-0.71733	-0.0686998
131	-0.700226	-0.0648165
131.1	-0.680636	-0.0599022
131.2	-0.658772	-0.0537739
131.3	-0.634864	-0.0462999
131.4	-0.609145	-0.0373507
131.5	-0.581866	-0.0268612
131.6	-0.55329	-0.014802
131.7	-0.523706	-0.00121021
131.8	-0.493381	0.0138626
131.9	-0.46258	0.0303001
132	-0.431571	0.0479441
132.1	-0.400634	0.066597
132.2	-0.37004	0.0860338
132.3	-0.340035	0.105989
132.4	-0.310869	0.126158
132.5	-0.28278	0.146243
132.6	-0.255966	0.165948
132.7	-0.230596	0.18497
132.8	-0.206815	0.203012
132.9	-0.184732	0.219807
133	-0.164439	0.235129
133.1	-0.145984	0.248812
133.2	-0.129395	0.260693
133.3	-0.114655	0.270702
133.4	-0.101708	0.278823
133.5	-0.0905046	0.285103
133.6	-0.0809622	0.289637
133.7	-0.0729704	0.292574
133.8	-0.0664234	0.294094
133.9	-0.0611954	0.294415
134	-0.0571737	0.293758
134.1	-0.0542192	0.29235
134.2	-0.0522099	0.290412
134.3	-0.0510159	0.288134
134.4	-0.0505056	0.285632
134.5	-0.0505524	0.283022
134.6	-0.0510416	0.280343
134.7	-0.0518637	0.277605
134.8	-0.0529146	0.274785
134.9	-0.0540867	0.271798
135	-0.0552778	0.268568
135.1	-0.0564051	0.26501
135.2	-0.0573969	0.261052
135.3	-0.0581818	0.256642
135.4	-0.0587368	0.251765
135.5	-0.059042	0.246434
135.6	-0.0590858	0.240723
135.7	-0.0588884	0.234727
135.8	-0.0584793	0.228581
135.9	-0.0579195	0.222441
136	-0.0572701	0.216477
136.1	-0.0566311	0.210855
136.2	-0.0560894	0.205729
136.3	-0.0557432	0.201188
136.4	-0.0556898	0.197285
136.5	-0.0560188	0.194023
136.6	-0.0568256	0.191339
136.7	-0.0581856	0.189117
136.8	-0.0601521	0.18719
136.9	-0.0627375	0.18533
137	-0.0659523	0.183311
137.1	-0.0697899	0.18089
137.2	-0.0742407	0.177846
137.3	-0.0792828	0.173952
137.4	-0.0848894	0.169005
137.5	-0.0910397	0.162853
137.6	-0.0977001	0.1554
137.7	-0.104856	0.146597
137.8	-0.112486	0.13643
137.9	-0.120581	0.124929
138	-0.129146	0.112164
138.1	-0.138204	0.0982075
138.2	-0.147777	0.083169
138.3	-0.157907	0.0671539
138.4	-0.168639	0.0502586
138.5	-0.180005	0.0325804
138.6	-0.192025	0.0141811
138.7	-0.204701	-0.00488091
138.8	-0.218026	-0.0245428
138.9	-0.231971	-0.0447397
139	-0.246479	-0.0653868
139.1	-0.261453	-0.0864172
139.2	-0.276756	-0.107717
139.3	-0.292239	-0.1292
139.4	-0.307741	-0.150745
139.5	-0.323078	-0.17222
139.6	-0.338044	-0.193475
139.7	-0.352459	-0.214358
139.8	-0.366111	-0.234712
139.9	-0.378836	-0.25437
140	-0.390472	-0.273196
140.1	-0.400885	-0.291069
140.2	-0.409996	-0.307912
140.3	-0.417739	-0.323666
140.4	-0.424111	-0.3383
140.5	-0.429129	-0.351828
140.6	-0.432866	-0.36431
140.7	-0.435431	-0.375799
140.8	-0.436942	-0.386372
140.9	-0.437551	-0.396107
141	-0.437413	-0.405095
141.1	-0.436697	-0.413424
141.2	-0.435573	-0.421173
141.3	-0.434193	-0.428423
141.4	-0.432677	-0.435246
141.5	-0.431109	-0.441739
141.6	-0.429536	-0.447952
141.7	-0.427975	-0.453936
141.8	-0.426407	-0.459732
141.9	-0.424784	-0.465402
142	-0.423006	-0.470985
142.1	-0.420964	-0.476527
142.2	-0.418518	-0.482072
142.3	-0.4155	-0.487657
142.4	-0.411744	-0.493323
142.5	-0.407093	-0.499078
142.6	-0.401398	-0.50493
142.7	-0.394527	-0.510887
142.8	-0.386384	-0.516932
142.9	-0.376902	-0.523031
143	-0.366071	-0.529168
143.1	-0.353908	-0.535322
143.2	-0.340493	-0.54146
143.3	-0.325914	-0.54755
143.4	-0.310317	-0.553579
143.5	-0.293875	-0.559557
143.6	-0.27679	-0.565506
143.7	-0.259273	-0.571489
143.8	-0.241559	-0.577588
143.9	-0.223901	-0.58394
144	-0.206546	-0.590666
144.1	-0.189744	-0.597928
144.2	-0.173698	-0.605887
144.3	-0.158587	-0.614726
144.4	-0.144592	-0.624578
144.5	-0.131862	-0.63558
144.6	-0.120496	-0.647849
144.7	-0.110578	-0.661434
144.8	-0.102153	-0.67636
144.9	-0.095253	-0.692583
145	-0.0898552	-0.710004
145.1	-0.0859032	-0.728472
145.2	-0.083312	-0.747751
145.3	-0.0819607	-0.767564
145.4	-0.0817003	-0.78759
145.5	-0.0823689	-0.807462
145.6	-0.0837755	-0.82682
145.7	-0.0857058	-0.845272
145.8	-0.0879307	-0.862412
145.9	-0.0901928	-0.877871
146	-0.0922365	-0.891276
146.1	-0.0937748	-0.902335
146.2	-0.0945435	-0.910792
146.3	-0.0942612	-0.916451
146.4	-0.0926771	-0.919195
146.5	-0.0895624	-0.918963
146.6	-0.0847178	-0.915779
146.7	-0.0779924	-0.909757
146.8	-0.0692835	-0.901063
146.9	-0.0585527	-0.889954
147	-0.0458202	-0.87673
147.1	-0.0311804	-0.861739
147.2	-0.014802	-0.845354
147.3	0.00306797	-0.827976
147.4	0.0221062	-0.810025
147.5	0.0419426	-0.791902
147.6	0.0621767	-0.774023
147.7	0.082346	-0.756762
147.8	0.101988	-0.740446
147.9	0.120619	-0.725371
148	0.137797	-0.711777
148.1	0.15313	-0.699844
148.2	0.166277	-0.689685
148.3	0.176958	-0.681363
148.4	0.184978	-0.674872
148.5	0.19026	-0.670153
148.6	0.192813	-0.66709
148.7	0.192739	-0.66552
148.8	0.190241	-0.665259
148.9	0.185586	-0.666052
149	0.179133	-0.667636
149.1	0.171295	-0.669718
149.2	0.162529	-0.671998
149.3	0.153308	-0.674149
149.4	0.144111	-0.675854
149.5	0.135398	-0.676794
149.6	0.127619	-0.676691
149.7	0.121174	-0.675269
149.8	0.116397	-0.672256
149.9	0.113567	-0.667408
150	0.112898	-0.660516
150.1	0.114538	-0.651392
150.2	0.118568	-0.639889
150.3	0.124997	-0.62588
150.4	0.133788	-0.609301
150.5	0.144837	-0.590117
150.6	0.157997	-0.568336
150.7	0.173092	-0.544011
150.8	0.189906	-0.517241
150.9	0.208206	-0.488165
151	0.227756	-0.456951
151.1	0.248289	-0.423838
151.2	0.26953	-0.389087
151.3	0.291215	-0.353037
151.4	0.313066	-0.316034
151.5	0.334824	-0.278459
151.6	0.356225	-0.240705
151.7	0.377046	-0.203182
151.8	0.397074	-0.166291
151.9	0.41613	-0.130433
152	0.434046	-0.0959959
152.1	0.450693	-0.0633488
152.2	0.465955	-0.0327959
152.3	0.479773	-0.0045929
152.4	0.492122	0.0210524
152.5	0.502995	0.0440016
152.6	0.512436	0.0641546
152.7	0.520502	0.0814857
152.8	0.527282	0.0960293
152.9	0.532887	0.107844
153	0.537422	0.117057
153.1	0.541004	0.123825
153.2	0.54372	0.128331
153.3	0.54569	0.13078
153.4	0.546963	0.13142
153.5	0.547604	0.130485
153.6	0.547631	0.128206
153.7	0.547072	0.124808
153.8	0.545901	0.120505
153.9	0.544101	0.115492
154	0.541631	0.109974
154.1	0.538447	0.104128
154.2	0.534489	0.0981398
154.3	0.529706	0.0921669
154.4	0.524054	0.0863695
154.5	0.517507	0.0808916
154.6	0.510052	0.0758944
154.7	0.501699	0.0715094
154.8	0.49248	0.067873
154.9	0.482448	0.0651121
155	0.47167	0.0633402
155.1	0.460235	0.0626516
155.2	0.448249	0.0631208
155.3	0.43584	0.0647984
155.4	0.423159	0.067708
155.5	0.410333	0.0718536
155.6	0.397513	0.0772009
155.7	0.384817	0.0836706
155.8	0.372358	0.0911303
155.9	0.36022	0.0994272
156	0.348496	0.108382
156.1	0.337231	0.117784
156.2	0.32645	0.127392
156.3	0.316141	0.136957
156.4	0.306258	0.146219
156.5	0.296696	0.154923
156.6	0.287338	0.162848
156.7	0.278025	0.169804
156.8	0.268584	0.17563
156.9	0.258828	0.18021
157	0.248541	0.183472
157.1	0.237521	0.185389
157.2	0.225581	0.18598
157.3	0.212561	0.185301
157.4	0.198333	0.183439
157.5	0.182825	0.180501
157.6	0.166022	0.176622
157.7	0.147946	0.171915
157.8	0.12871	0.166446
157.9	0.108484	0.160259
158	0.0874853	0.153377
158.1	0.066	0.145762
158.2	0.0443392	0.137323
158.3	0.0228453	0.127919
158.4	0.00188065	0.117351
158.5	-0.018158	0.105406
158.6	-0.0368929	0.0918159
158.7	-0.0539675	0.0763168
158.8	-0.069066	0.0586472
158.9	-0.0819273	0.0385885
159	-0.0923586	0.0159454
159.1	-0.100247	-0.00941944
159.2	-0.105535	-0.037549
159.3	-0.108278	-0.0684347
159.4	-0.108609	-0.101957
159.5	-0.106755	-0.137927
159.6	-0.103029	-0.176065
159.7	-0.0978222	-0.216002
159.8	-0.0915794	-0.257291
159.9	-0.0847931	-0.299449
160	-0.0779943	-0.341928
160.1	-0.0717182	-0.384177
160.2	-0.0664759	-0.425649
160.3	-0.0627584	-0.465812
160.4	-0.0609846	-0.504156
160.5	-0.0615044	-0.540236
160.6	-0.0645847	-0.573656
160.7	-0.0703878	-0.604106
160.8	-0.0789566	-0.631321
160.9	-0.090229	-0.655159
161	-0.10401	-0.675575
161.1	-0.12003	-0.692593
161.2	-0.137919	-0.70631
161.3	-0.157227	-0.716887
161.4	-0.177467	-0.724562
161.5	-0.198117	-0.729609
161.6	-0.218662	-0.732339
161.7	-0.238586	-0.73308
161.8	-0.257432	-0.732167
161.9	-0.274784	-0.729948
162	-0.290306	-0.726742
162.1	-0.303718	-0.722831
162.2	-0.314839	-0.718489
162.3	-0.323589	-0.713946
162.4	-0.329988	-0.709407
162.5	-0.334124	-0.705037
162.6	-0.336171	-0.700964
162.7	-0.336384	-0.697301
162.8	-0.335044	-0.69415
162.9	-0.332479	-0.691559
163	-0.329039	-0.689572
163.1	-0.3251	-0.688236
163.2	-0.321016	-0.687564
163.3	-0.317145	-0.687576
163.4	-0.313817	-0.688298
163.5	-0.311332	-0.689754
163.6	-0.30992	-0.691933
163.7	-0.309783	-0.694818
163.8	-0.311055	-0.698373
163.9	-0.313823	-0.702559
164	-0.318124	-0.707314
164.1	-0.323928	-0.712561
164.2	-0.331144	-0.718204
164.3	-0.339628	-0.724132
164.4	-0.349181	-0.730204
164.5	-0.359578	-0.736293
164.6	-0.370531	-0.742274
164.7	-0.381729	-0.748014
164.8	-0.392851	-0.753394
164.9	-0.403533	-0.758301
165	-0.413433	-0.762636
165.1	-0.422209	-0.766327
165.2	-0.429528	-0.769332
165.3	-0.435092	-0.771648
165.4	-0.438648	-0.773295
165.5	-0.439981	-0.774297
165.6	-0.438911	-0.774744
165.7	-0.435301	-0.774727
165.8	-0.429073	-0.774364
165.9	-0.420188	-0.773799
166	-0.408691	-0.773172
166.1	-0.394673	-0.772635
166.2	-0.378279	-0.772326
166.3	-0.359693	-0.77236
166.4	-0.33915	-0.772843
166.5	-0.316941	-0.773849
166.6	-0.293381	-0.775438
166.7	-0.268795	-0.77761
166.8	-0.243521	-0.780334
166.9	-0.217902	-0.783525
167	-0.192276	-0.787061
167.1	-0.166969	-0.790757
167.2	-0.142283	-0.794404
167.3	-0.118484	-0.797745
167.4	-0.0957975	-0.8005
167.5	-0.0743904	-0.802399
167.6	-0.0543728	-0.803164
167.7	-0.0358114	-0.80254
167.8	-0.0187044	-0.800279
167.9	-0.00298023	-0.796165
168	0.011487	-0.790054
168.1	0.0248652	-0.781816
168.2	0.0373478	-0.771406
168.3	0.0491791	-0.758837
168.4	0.0606308	-0.744186
168.5	0.0719585	-0.727571
168.6	0.083415	-0.709173
168.7	0.0952206	-0.689229
168.8	0.107575	-0.667995
168.9	0.120623	-0.645747
169	0.134445	-0.62276
169.1	0.149064	-0.599339
169.2	0.164464	-0.575773
169.3	0.180563	-0.55233
169.4	0.197229	-0.529237
169.5	0.214277	-0.506693
169.6	0.231479	-0.484875
169.7	0.248579	-0.463918
169.8	0.265307	-0.443919
169.9	0.281389	-0.424921
170	0.296563	-0.406951
170.1	0.310571	-0.390017
170.2	0.323174	-0.374078
170.3	0.33418	-0.359076
170.4	0.343442	-0.344925
170.5	0.350825	-0.331553
170.6	0.356258	-0.318868
170.7	0.359697	-0.306766
170.8	0.361124	-0.295187
170.9	0.360566	-0.284059
171	0.358079	-0.27332
171.1	0.35376	-0.262937
171.2	0.34772	-0.25288
171.3	0.340111	-0.243159
171.4	0.331111	-0.233787
171.5	0.320913	-0.224812
171.6	0.309726	-0.216309
171.7	0.297751	-0.20837
171.8	0.28522	-0.201101
171.9	0.272376	-0.194582
172	0.25944	-0.188919
172.1	0.246647	-0.184214
172.2	0.23421	-0.180543
172.3	0.222341	-0.177973
172.4	0.211228	-0.176538
172.5	0.201077	-0.176248
172.6	0.192031	-0.17706
172.7	0.184233	-0.178906
172.8	0.17778	-0.181661
172.9	0.172762	-0.185168
173	0.169239	-0.189237
173.1	0.167227	-0.193645
173.2	0.166738	-0.198124
173.3	0.167734	-0.202414
173.4	0.170169	-0.20624
173.5	0.173965	-0.209324
173.6	0.179004	-0.211395
173.7	0.185156	-0.212206
173.8	0.192259	-0.211545
173.9	0.200133	-0.209247
174	0.208589	-0.205206
174.1	0.217425	-0.199379
174.2	0.22643	-0.191771
174.3	0.235379	-0.182433
174.4	0.244039	-0.171473
174.5	0.252203	-0.159042
174.6	0.259663	-0.14533
174.7	0.266248	-0.13057
174.8	0.271807	-0.115021
174.9	0.276229	-0.0989313
175	0.279408	-0.0825548
175.1	0.281286	-0.0661306
175.2	0.281832	-0.0498838
175.3	0.281042	-0.0340118
175.4	0.278942	-0.0186815
175.5	0.275571	-0.00400162
175.6	0.27099	0.00993443
175.7	0.265251	0.0230522
175.8	0.25843	0.0353107
175.9	0.250587	0.0466757
176	0.24178	0.0571337
176.1	0.232045	0.0666847
176.2	0.221404	0.0753279
176.3	0.209867	0.083066
176.4	0.197425	0.089879
176.5	0.184079	0.0957632
176.6	0.169841	0.100687
176.7	0.154709	0.104647
176.8	0.1387	0.107621
176.9	0.121864	0.109604
177	0.104273	0.110612
177.1	0.0860405	0.11067
177.2	0.0672913	0.109827
177.3	0.0482187	0.108151
177.4	0.0290556	0.105741
177.5	0.0100851	0.102746
177.6	-0.00839329	0.0993185
177.7	-0.0260544	0.0956564
177.8	-0.0425606	0.0919523
177.9	-0.0575666	0.0884228
178	-0.0707426	0.085289
178.1	-0.0817642	0.0827465
178.2	-0.0903502	0.0810022
178.3	-0.0962667	0.0802174
178.4	-0.0993366	0.0805244
178.5	-0.099452	0.0820112
178.6	-0.0965796	0.0847273
178.7	-0.0907564	0.0886698
178.8	-0.0820932	0.0937901
178.9	-0.0707808	0.0999708
179	-0.0570669	0.107055
179.1	-0.0412588	0.114842
179.2	-0.023715	0.123102
179.3	-0.00484562	0.131566
179.4	0.0149202	0.139949
179.5	0.0351496	0.147982
179.6	0.0554113	0.155409
179.7	0.0752916	0.161992
179.8	0.0943785	0.167506
179.9	0.112277	0.171786
180	0.128651	0.174719
180.1	0.143179	0.176279
180.2	0.155601	0.176461
180.3	0.165684	0.175352
180.4	0.173243	0.173094
180.5	0.17814	0.169866
180.6	0.180274	0.165906
180.7	0.179584	0.161469
180.8	0.176066	0.15682
180.9	0.16976	0.152257
181	0.160746	0.14806
181.1	0.149162	0.14448
181.2	0.135186	0.141718
181.3	0.119067	0.139915
181.4	0.101071	0.139162
181.5	0.0815191	0.139475
181.6	0.0607901	0.140792
181.7	0.0392866	0.14299
181.8	0.0174599	0.145864
181.9	-0.00422573	0.149155
182	-0.0252924	0.152558
182.1	-0.0452719	0.155718
182.2	-0.0636959	0.158268
182.3	-0.080142	0.159826
182.4	-0.0942297	0.160028
182.5	-0.105654	0.158536
182.6	-0.114169	0.155066
182.7	-0.119634	0.149386
182.8	-0.121995	0.141365
182.9	-0.12131	0.130908
183	-0.117715	0.118038
183.1	-0.111464	0.102858
183.2	-0.102888	0.0855627
183.3	-0.0924253	0.0664139
183.4	-0.0805578	0.0457754
183.5	-0.0678349	0.0240459
183.6	-0.0548277	0.00168037
183.7	-0.042119	-0.020854
183.8	-0.0302801	-0.0430565
183.9	-0.0198278	-0.0644426
184	-0.0112371	-0.0845613
184.1	-0.00491714	-0.102997
184.2	-0.0012064	-0.119396
184.3	-0.00033474	-0.133461
184.4	-0.00245094	-0.144988
184.5	-0.00759315	-0.153853
184.6	-0.0157108	-0.160029
184.7	-0.0266676	-0.163557
184.8	-0.0402422	-0.164573
184.9	-0.0561419	-0.163283
185	-0.074029	-0.159996
185.1	-0.0934887	-0.155058
185.2	-0.114098	-0.148862
185.3	-0.135429	-0.141836
185.4	-0.157045	-0.134438
185.5	-0.178508	-0.127137
185.6	-0.199378	-0.120364
185.7	-0.219257	-0.114543
185.8	-0.237767	-0.110034
185.9	-0.254602	-0.107157
186	-0.269476	-0.106133
186.1	-0.282162	-0.107097
186.2	-0.292481	-0.110122
186.3	-0.300308	-0.115176
186.4	-0.305568	-0.122127
186.5	-0.308237	-0.130765
186.6	-0.308342	-0.140789
186.7	-0.305958	-0.15184
186.8	-0.301203	-0.163506
186.9	-0.29423	-0.175336
187	-0.285237	-0.186897
187.1	-0.274458	-0.197764
187.2	-0.26215	-0.207521
187.3	-0.248565	-0.215837
187.4	-0.233961	-0.222424
187.5	-0.218626	-0.227112
187.6	-0.202821	-0.2298
187.7	-0.186791	-0.230504
187.8	-0.170781	-0.229353
187.9	-0.155	-0.226529
188	-0.139665	-0.222338
188.1	-0.124961	-0.217121
188.2	-0.11107	-0.211266
188.3	-0.0981331	-0.205196
188.4	-0.0862722	-0.199346
188.5	-0.0755939	-0.194109
188.6	-0.0661983	-0.189855
188.7	-0.0581694	-0.186894
188.8	-0.0515766	-0.185462
188.9	-0.0464678	-0.185727
189	-0.0428629	-0.187774
189.1	-0.0407715	-0.191626
189.2	-0.0401716	-0.197205
189.3	-0.0410185	-0.204391
189.4	-0.043232	-0.213003
189.5	-0.0467148	-0.222833
189.6	-0.051343	-0.233621
189.7	-0.0569677	-0.245103
189.8	-0.0634336	-0.257005
189.9	-0.0705605	-0.269056
190	-0.0781584	-0.280984
190.1	-0.0860233	-0.292536
190.2	-0.0939264	-0.30349
190.3	-0.101658	-0.313623
190.4	-0.109015	-0.32274
190.5	-0.115821	-0.330654
190.6	-0.121898	-0.337193
190.7	-0.127096	-0.342207
190.8	-0.131258	-0.345552
190.9	-0.13427	-0.347113
191	-0.136032	-0.346801
191.1	-0.136488	-0.344531
191.2	-0.135584	-0.340263
191.3	-0.133308	-0.333979
191.4	-0.129677	-0.325723
191.5	-0.124715	-0.315557
191.6	-0.118493	-0.303606
191.7	-0.111104	-0.29003
191.8	-0.102686	-0.275065
191.9	-0.0933619	-0.258964
192	-0.0832815	-0.242027
192.1	-0.0726118	-0.224589
192.2	-0.0615377	-0.206995
192.3	-0.0502443	-0.18961
192.4	-0.0389338	-0.172792
192.5	-0.0277882	-0.156905
192.6	-0.0169659	-0.142291
192.7	-0.00661755	-0.129286
192.8	0.00314903	-0.118163
192.9	0.0122318	-0.109164
193	0.020586	-0.102506
193.1	0.0281773	-0.0983343
193.2	0.0350256	-0.0967569
193.3	0.0411596	-0.097827
193.4	0.0466566	-0.101535
193.5	0.05159	-0.107821
193.6	0.0560646	-0.116577
193.7	0.060194	-0.127629
193.8	0.0640688	-0.140772
193.9	0.0677958	-0.155746
194	0.071476	-0.172247
194.1	0.0751877	-0.18995
194.2	0.0789652	-0.208483
194.3	0.08284	-0.227458
194.4	0.086812	-0.246473
194.5	0.0908604	-0.265122
194.6	0.0949497	-0.283009
194.7	0.0990191	-0.299747
194.8	0.102972	-0.314969
194.9	0.106709	-0.328352
195	0.11011	-0.339616
195.1	0.113063	-0.348545
195.2	0.115453	-0.354993
195.3	0.117146	-0.358908
195.4	0.118016	-0.360319
195.5	0.117962	-0.359339
195.6	0.116873	-0.356164
195.7	0.114685	-0.351067
195.8	0.11132	-0.344398
195.9	0.106736	-0.336582
196	0.100921	-0.328089
196.1	0.0938978	-0.319429
196.2	0.0857105	-0.311132
196.3	0.0764141	-0.303735
196.4	0.0661192	-0.297732
196.5	0.0549707	-0.293608
196.6	0.0431395	-0.291782
196.7	0.0308332	-0.292628
196.8	0.01826	-0.29643
196.9	0.00565815	-0.303391
197	-0.00675392	-0.313629
197.1	-0.0187597	-0.327185
197.2	-0.0301447	-0.344008
197.3	-0.040719	-0.363973
197.4	-0.0503168	-0.386884
197.5	-0.0588045	-0.412507
197.6	-0.0661001	-0.440546
197.7	-0.0721674	-0.470691
197.8	-0.0770311	-0.502583
197.9	-0.0807219	-0.535861
198	-0.0833502	-0.57017
198.1	-0.0850639	-0.605152
198.2	-0.0860424	-0.640441
198.3	-0.0864697	-0.675679
198.4	-0.086566	-0.710513
198.5	-0.0865326	-0.744612
198.6	-0.0865746	-0.777642
198.7	-0.0868807	-0.809278
198.8	-0.0876322	-0.839209
198.9	-0.0889807	-0.86713
199	-0.0910406	-0.892771
199.1	-0.0938845	-0.915874
199.2	-0.0975647	-0.936225
199.3	-0.102078	-0.953643
199.4	-0.107416	-0.967986
199.5	-0.113537	-0.979172
199.6	-0.120378	-0.987183
199.7	-0.127871	-0.992059
[truncated: 5,003 more rows]

## Sheet: 17n06029.abf
	current (pA)
Time (ms)	30 uM 5-HT	100 uM cocaine
0	-0.295995	0.386294
0.0996094	-0.317662	0.384583
0.200195	-0.337424	0.380495
0.299805	-0.355066	0.373759
0.400391	-0.37045	0.364128
0.5	-0.383533	0.351392
0.599609	-0.394441	0.335414
0.700195	-0.403318	0.316215
0.799805	-0.410426	0.293908
0.900391	-0.416161	0.268676
1	-0.420922	0.24083
1.09961	-0.425116	0.210752
1.2002	-0.429172	0.178921
1.2998	-0.433462	0.145904
1.40039	-0.438333	0.112315
1.5	-0.444044	0.0787604
1.59961	-0.450808	0.0458822
1.7002	-0.458705	0.0143478
1.7998	-0.467673	-0.0152198
1.90039	-0.477618	-0.0423354
2	-0.488389	-0.0665775
2.09961	-0.499757	-0.0875591
2.2002	-0.511377	-0.104999
2.2998	-0.522918	-0.118746
2.40039	-0.534087	-0.128776
2.5	-0.544607	-0.135142
2.59961	-0.554217	-0.13805
2.7002	-0.562665	-0.137787
2.7998	-0.569796	-0.13468
2.90039	-0.575509	-0.129114
3	-0.579774	-0.121493
3.09961	-0.582639	-0.112263
3.2002	-0.584139	-0.101843
3.2998	-0.58435	-0.0906721
3.40039	-0.583385	-0.0791167
3.5	-0.581364	-0.0674688
3.59961	-0.578393	-0.0559438
3.7002	-0.574581	-0.0446883
3.7998	-0.570026	-0.0338526
3.90039	-0.564833	-0.0235121
4	-0.559094	-0.0136699
4.09961	-0.552858	-0.00430507
4.2002	-0.546217	0.00465733
4.2998	-0.539166	0.0132629
4.40039	-0.531784	0.0216226
4.5	-0.524137	0.0297515
4.59961	-0.51629	0.0376591
4.7002	-0.508361	0.0453694
4.7998	-0.500452	0.0528921
4.90039	-0.49266	0.0601507
5	-0.485072	0.0670756
5.09961	-0.477778	0.0735704
5.2002	-0.470853	0.0795416
5.2998	-0.46439	0.0849233
5.40039	-0.45846	0.0896061
5.5	-0.453155	0.0935827
5.59961	-0.448531	0.0968235
5.7002	-0.444615	0.0993309
5.7998	-0.441388	0.101183
5.90039	-0.438837	0.102443
6	-0.436991	0.103268
6.09961	-0.435868	0.1038
6.2002	-0.435436	0.104126
6.2998	-0.435629	0.104389
6.40039	-0.436379	0.104675
6.5	-0.437648	0.105114
6.59961	-0.43939	0.105784
6.7002	-0.441498	0.106678
6.7998	-0.44387	0.107773
6.90039	-0.446404	0.108967
7	-0.44895	0.110141
7.09961	-0.451369	0.111116
7.2002	-0.453546	0.111734
7.2998	-0.455345	0.111787
7.40039	-0.456624	0.111054
7.5	-0.457226	0.109338
7.59961	-0.457057	0.106424
7.7002	-0.456041	0.102128
7.7998	-0.454085	0.0963305
7.90039	-0.451113	0.0889421
8	-0.447105	0.0799034
8.09961	-0.442055	0.0692149
8.2002	-0.435964	0.0568799
8.2998	-0.428853	0.0429659
8.40039	-0.42079	0.0275886
8.5	-0.411879	0.0108991
8.59961	-0.402192	-0.00690055
8.7002	-0.391856	-0.0256267
8.7998	-0.380972	-0.04503
8.90039	-0.369708	-0.0648089
9	-0.358229	-0.0846723
9.09961	-0.346701	-0.104292
9.2002	-0.335296	-0.123367
9.2998	-0.324223	-0.141543
9.40039	-0.3137	-0.158474
9.5	-0.303941	-0.173843
9.59961	-0.295138	-0.187356
9.7002	-0.28751	-0.198793
9.7998	-0.281244	-0.207902
9.90039	-0.276494	-0.214552
10	-0.273335	-0.218672
10.0996	-0.271872	-0.220283
10.2002	-0.272191	-0.219492
10.2998	-0.274293	-0.216385
10.4004	-0.278118	-0.211177
10.5	-0.283576	-0.204154
10.5996	-0.29058	-0.195619
10.7002	-0.298945	-0.185952
10.7998	-0.308461	-0.175493
10.9004	-0.31892	-0.164623
11	-0.330113	-0.153668
11.0996	-0.341818	-0.142922
11.2002	-0.353824	-0.132661
11.2998	-0.365942	-0.123087
11.4004	-0.377953	-0.11443
11.5	-0.38971	-0.106835
11.5996	-0.401091	-0.100374
11.7002	-0.41199	-0.0951362
11.7998	-0.422346	-0.0911511
11.9004	-0.432099	-0.0884243
12	-0.441267	-0.0869798
12.0996	-0.449843	-0.0868126
12.2002	-0.457817	-0.0879
12.2998	-0.465237	-0.0902374
12.4004	-0.472155	-0.0938186
12.5	-0.478649	-0.0986283
12.5996	-0.484765	-0.1046
12.7002	-0.490553	-0.111701
12.7998	-0.496002	-0.119857
12.9004	-0.501187	-0.128929
13	-0.506152	-0.138834
13.0996	-0.510891	-0.149397
13.2002	-0.515404	-0.160423
13.2998	-0.519659	-0.171674
13.4004	-0.523648	-0.182881
13.5	-0.527337	-0.193768
13.5996	-0.530647	-0.204024
13.7002	-0.533547	-0.213366
13.7998	-0.536002	-0.221523
13.9004	-0.537894	-0.228212
14	-0.539126	-0.233252
14.0996	-0.539593	-0.236439
14.2002	-0.53924	-0.237658
14.2998	-0.538004	-0.236846
14.4004	-0.535812	-0.23394
14.5	-0.53257	-0.229049
14.5996	-0.528165	-0.222314
14.7002	-0.522547	-0.213899
14.7998	-0.515683	-0.204033
14.9004	-0.507491	-0.193006
15	-0.497969	-0.181132
15.0996	-0.487105	-0.168725
15.2002	-0.474875	-0.156139
15.2998	-0.461316	-0.143688
15.4004	-0.446482	-0.131659
15.5	-0.430381	-0.120326
15.5996	-0.413078	-0.109903
15.7002	-0.394647	-0.100574
15.7998	-0.375207	-0.0924927
15.9004	-0.354865	-0.0857724
16	-0.333745	-0.0803972
16.0996	-0.311977	-0.0763739
16.2002	-0.289749	-0.0736376
16.2998	-0.267249	-0.0720915
16.4004	-0.244638	-0.0716145
16.5	-0.222085	-0.0720243
16.5996	-0.199837	-0.073158
16.7002	-0.178102	-0.07483
16.7998	-0.157059	-0.0768502
16.9004	-0.136883	-0.0790291
17	-0.117778	-0.0811417
17.0996	-0.099952	-0.082973
17.2002	-0.0835897	-0.0843265
17.2998	-0.0688575	-0.085065
17.4004	-0.0558755	-0.0849975
17.5	-0.0447281	-0.0839549
17.5996	-0.0354871	-0.0818046
17.7002	-0.0282301	-0.0784408
17.7998	-0.022985	-0.0738272
17.9004	-0.0197286	-0.0678351
18	-0.0184307	-0.0604381
18.0996	-0.0189687	-0.051584
18.2002	-0.0212374	-0.0412936
18.2998	-0.0251013	-0.0296353
18.4004	-0.0304104	-0.0166345
18.5	-0.0369856	-0.00233393
18.5996	-0.0446451	0.0132031
18.7002	-0.0532486	0.0299265
18.7998	-0.0626109	0.0477489
18.9004	-0.0725992	0.0665732
19	-0.0830272	0.0863117
19.0996	-0.0938506	0.106888
19.2002	-0.105034	0.128238
19.2998	-0.116601	0.150282
19.4004	-0.128602	0.172944
19.5	-0.141085	0.196142
19.5996	-0.154194	0.219796
19.7002	-0.168063	0.243827
19.7998	-0.182891	0.268143
19.9004	-0.198842	0.292606
20	-0.216086	0.317138
20.0996	-0.234806	0.341626
20.2002	-0.255118	0.365921
20.2998	-0.277136	0.389874
20.4004	-0.300852	0.413298
20.5	-0.326255	0.436059
20.5996	-0.353275	0.457964
20.7002	-0.381741	0.478819
20.7998	-0.411484	0.498429
20.9004	-0.442208	0.516583
21	-0.473588	0.533113
21.0996	-0.505244	0.547789
21.2002	-0.536775	0.560408
21.2998	-0.567767	0.570747
21.4004	-0.597706	0.578609
21.5	-0.626158	0.583819
21.5996	-0.652715	0.586237
21.7002	-0.676988	0.585771
21.7998	-0.69861	0.582346
21.9004	-0.717282	0.575891
22	-0.732739	0.566431
22.0996	-0.744795	0.553995
22.2002	-0.753369	0.538645
22.2998	-0.758439	0.520473
22.4004	-0.76008	0.499575
22.5	-0.758425	0.476137
22.5996	-0.7537	0.450341
22.7002	-0.746155	0.422343
22.7998	-0.736108	0.392335
22.9004	-0.723938	0.360535
23	-0.710056	0.327102
23.0996	-0.694837	0.292197
23.2002	-0.6787	0.256013
23.2998	-0.662001	0.218775
23.4004	-0.645126	0.18067
23.5	-0.628429	0.141972
23.5996	-0.612147	0.10294
23.7002	-0.596494	0.0638717
23.7998	-0.581638	0.0250949
23.9004	-0.567697	-0.0130485
24	-0.554723	-0.0502119
24.0996	-0.542738	-0.0859955
24.2002	-0.531676	-0.120008
24.2998	-0.521485	-0.151871
24.4004	-0.512106	-0.181234
24.5	-0.503444	-0.207753
24.5996	-0.495358	-0.231188
24.7002	-0.48773	-0.251329
24.7998	-0.480503	-0.26805
24.9004	-0.473619	-0.281309
25	-0.467029	-0.291147
25.0996	-0.460663	-0.297619
25.2002	-0.45444	-0.30087
25.2998	-0.44831	-0.301096
25.4004	-0.442264	-0.298596
25.5	-0.436308	-0.293635
25.5996	-0.430399	-0.286509
25.7002	-0.424485	-0.277485
25.7998	-0.41854	-0.266838
25.9004	-0.412512	-0.254859
26	-0.406361	-0.241731
26.0996	-0.400049	-0.227637
26.2002	-0.393518	-0.212725
26.2998	-0.386696	-0.197133
26.4004	-0.379578	-0.180967
26.5	-0.372107	-0.164293
26.5996	-0.364247	-0.147181
26.7002	-0.356027	-0.129672
26.7998	-0.347456	-0.111807
26.9004	-0.338556	-0.0936035
27	-0.329401	-0.075132
27.0996	-0.319997	-0.0564483
27.2002	-0.310429	-0.0375934
27.2998	-0.300718	-0.0186223
27.4004	-0.29096	0.000362709
27.5	-0.281206	0.0192724
27.5996	-0.271485	0.0379914
27.7002	-0.26186	0.0564104
27.7998	-0.252329	0.0744149
27.9004	-0.242907	0.0918736
28	-0.23359	0.10864
28.0996	-0.224351	0.124543
28.2002	-0.21515	0.139458
28.2998	-0.205906	0.15326
28.4004	-0.196588	0.165781
28.5	-0.187117	0.176862
28.5996	-0.177461	0.186363
28.7002	-0.167596	0.194142
28.7998	-0.157505	0.200089
28.9004	-0.147217	0.20407
29	-0.136759	0.206025
29.0996	-0.126154	0.205865
29.2002	-0.115443	0.203509
29.2998	-0.104713	0.198964
29.4004	-0.0941257	0.192224
29.5	-0.0837446	0.183365
29.5996	-0.0736577	0.17244
29.7002	-0.0639668	0.159561
29.7998	-0.0548279	0.144877
29.9004	-0.0463935	0.128533
30	-0.0387828	0.110742
30.0996	-0.0320895	0.0917121
30.2002	-0.0264237	0.071711
30.2998	-0.0219063	0.0509243
30.4004	-0.0186146	0.0296271
30.5	-0.0166725	0.00806098
30.5996	-0.0162115	-0.0135228
30.7002	-0.0173873	-0.0348625
30.7998	-0.0202728	-0.0557445
30.9004	-0.0249724	-0.0759678
31	-0.0315729	-0.0953076
31.0996	-0.0401527	-0.113552
31.2002	-0.0507819	-0.130577
31.2998	-0.063482	-0.146287
31.4004	-0.0782286	-0.160558
31.5	-0.0949223	-0.173352
31.5996	-0.113464	-0.184594
31.7002	-0.13371	-0.194249
31.7998	-0.155417	-0.202285
31.9004	-0.178287	-0.208727
32	-0.201968	-0.213608
32.0996	-0.226067	-0.216966
32.2002	-0.250212	-0.218847
32.2998	-0.273927	-0.219304
32.4004	-0.296749	-0.218422
32.5	-0.318213	-0.216322
32.5996	-0.337856	-0.213077
32.7002	-0.355237	-0.20883
32.7998	-0.369948	-0.20376
32.9004	-0.381621	-0.198018
33	-0.389997	-0.19181
33.0996	-0.394869	-0.185369
33.2002	-0.396128	-0.178938
33.2998	-0.393716	-0.172758
33.4004	-0.387645	-0.1671
33.5	-0.37803	-0.162238
33.5996	-0.365066	-0.158405
33.7002	-0.349008	-0.155875
33.7998	-0.330183	-0.154836
33.9004	-0.308991	-0.155464
34	-0.28583	-0.157875
34.0996	-0.261132	-0.162137
34.2002	-0.235344	-0.168245
34.2998	-0.208912	-0.176113
34.4004	-0.182247	-0.185631
34.5	-0.15579	-0.196566
34.5996	-0.129879	-0.208635
34.7002	-0.10484	-0.221506
34.7998	-0.0809388	-0.23487
34.9004	-0.0583896	-0.248322
35	-0.0373597	-0.261441
35.0996	-0.0179687	-0.273846
35.2002	-0.000281849	-0.285185
35.2998	0.0156687	-0.295106
35.4004	0.0299272	-0.303311
35.5	0.0425218	-0.309555
35.5996	0.0534971	-0.313659
35.7002	0.0629256	-0.315555
35.7998	0.070863	-0.315276
35.9004	0.0773504	-0.312848
36	0.0824048	-0.308396
36.0996	0.0860744	-0.302104
36.2002	0.0883604	-0.294238
36.2998	0.0892344	-0.28508
36.4004	0.0886536	-0.27494
36.5	0.0866012	-0.264207
36.5996	0.0830811	-0.253294
36.7002	0.078052	-0.242587
36.7998	0.0715035	-0.232454
36.9004	0.0634731	-0.223254
37	0.0540107	-0.215319
37.0996	0.0431735	-0.208924
37.2002	0.0310595	-0.204337
37.2998	0.017832	-0.201764
37.4004	0.00368282	-0.20137
37.5	-0.0111898	-0.203255
37.5996	-0.0265422	-0.207431
37.7002	-0.0421385	-0.213914
37.7998	-0.0577426	-0.222603
37.9004	-0.0731072	-0.233364
38	-0.0880795	-0.246062
38.0996	-0.102491	-0.260502
38.2002	-0.116169	-0.276473
38.2998	-0.129036	-0.293678
38.4004	-0.141035	-0.31192
38.5	-0.152198	-0.330921
38.5996	-0.162563	-0.350446
38.7002	-0.172227	-0.37027
38.7998	-0.181384	-0.390139
38.9004	-0.19021	-0.409842
39	-0.198902	-0.429213
39.0996	-0.207644	-0.448099
39.2002	-0.216653	-0.466344
39.2998	-0.226131	-0.483825
39.4004	-0.236226	-0.500431
39.5	-0.247133	-0.516007
39.5996	-0.258942	-0.530444
39.7002	-0.271682	-0.543635
39.7998	-0.285358	-0.555443
39.9004	-0.299871	-0.565781
40	-0.315107	-0.574517
40.0996	-0.330868	-0.581535
40.2002	-0.34683	-0.586734
40.2998	-0.362677	-0.589979
40.4004	-0.378061	-0.591157
40.5	-0.392628	-0.590194
40.5996	-0.406013	-0.587032
40.7002	-0.417852	-0.581644
40.7998	-0.427787	-0.574016
40.9004	-0.435537	-0.564224
41	-0.44084	-0.552362
41.0996	-0.443557	-0.538571
41.2002	-0.443587	-0.523003
41.2998	-0.440933	-0.505837
41.4004	-0.43566	-0.487318
41.5	-0.427918	-0.46768
41.5996	-0.417974	-0.447216
41.7002	-0.406132	-0.426207
41.7998	-0.392727	-0.404913
41.9004	-0.378123	-0.383581
42	-0.36273	-0.362414
42.0996	-0.34699	-0.341583
42.2002	-0.331281	-0.321224
42.2998	-0.315998	-0.301434
42.4004	-0.301446	-0.282229
42.5	-0.28791	-0.263601
42.5996	-0.275633	-0.245474
42.7002	-0.264804	-0.227763
42.7998	-0.255541	-0.210291
42.9004	-0.247871	-0.192919
43	-0.241777	-0.175449
43.0996	-0.237214	-0.157692
43.2002	-0.234108	-0.13948
43.2998	-0.232342	-0.1207
43.4004	-0.231737	-0.101254
43.5	-0.232085	-0.0810653
43.5996	-0.233173	-0.0601757
43.7002	-0.23481	-0.0386033
43.7998	-0.23676	-0.016476
43.9004	-0.238822	0.00597044
44	-0.240809	0.0284965
44.0996	-0.242594	0.0508305
44.2002	-0.24404	0.0726475
44.2998	-0.245035	0.0935507
44.4004	-0.245528	0.113149
44.5	-0.245526	0.131099
44.5996	-0.245083	0.147102
44.7002	-0.244244	0.160832
44.7998	-0.243094	0.172001
44.9004	-0.241749	0.180394
45	-0.24039	0.185871
45.0996	-0.239225	0.188387
45.2002	-0.238408	0.187935
45.2998	-0.238094	0.184566
45.4004	-0.23843	0.178441
45.5	-0.239576	0.16977
45.5996	-0.241658	0.158823
45.7002	-0.244702	0.145899
45.7998	-0.248737	0.131348
45.9004	-0.253736	0.115516
46	-0.259652	0.0988145
46.0996	-0.266358	0.0815895
46.2002	-0.273704	0.0641882
46.2998	-0.281494	0.0468767
46.4004	-0.289527	0.0299059
46.5	-0.297583	0.0134696
46.5996	-0.305412	-0.00230097
46.7002	-0.312818	-0.0172824
46.7998	-0.319587	-0.0314982
46.9004	-0.325604	-0.0450253
47	-0.330775	-0.0578967
47.0996	-0.33502	-0.0702232
47.2002	-0.338313	-0.0821638
47.2998	-0.340675	-0.0938872
47.4004	-0.342177	-0.105595
47.5	-0.342879	-0.117397
47.5996	-0.342902	-0.129395
47.7002	-0.342393	-0.141629
47.7998	-0.341533	-0.154139
47.9004	-0.34051	-0.166874
48	-0.33947	-0.179682
48.0996	-0.338568	-0.192423
48.2002	-0.337964	-0.204908
48.2998	-0.337766	-0.216897
48.4004	-0.338015	-0.228168
48.5	-0.338735	-0.238438
48.5996	-0.339957	-0.247513
48.7002	-0.341623	-0.255148
48.7998	-0.343686	-0.261171
48.9004	-0.346057	-0.265464
49	-0.348615	-0.26797
49.0996	-0.35123	-0.268714
49.2002	-0.353707	-0.267764
49.2998	-0.355864	-0.265257
49.4004	-0.357489	-0.26135
49.5	-0.358371	-0.256294
49.5996	-0.358289	-0.250317
49.7002	-0.357023	-0.243661
49.7998	-0.354363	-0.236586
49.9004	-0.350122	-0.229356
50	-0.344127	-0.222218
50.0996	-0.336204	-0.215337
50.2002	-0.326259	-0.208839
50.2998	-0.314228	-0.202831
50.4004	-0.300104	-0.197448
50.5	-0.28392	-0.192719
50.5996	-0.265771	-0.188647
50.7002	-0.245793	-0.185205
50.7998	-0.224216	-0.182335
50.9004	-0.201337	-0.180028
51	-0.177461	-0.178244
51.0996	-0.152877	-0.176965
51.2002	-0.127934	-0.17618
51.2998	-0.103002	-0.175842
51.4004	-0.0784661	-0.176038
51.5	-0.0547092	-0.176813
51.5996	-0.0320252	-0.178226
51.7002	-0.0107134	-0.180378
51.7998	0.00898177	-0.183354
51.9004	0.0268713	-0.187295
52	0.0428615	-0.192301
52.0996	0.0568723	-0.198546
52.2002	0.0688844	-0.206159
52.2998	0.078978	-0.215204
52.4004	0.0872635	-0.225729
52.5	0.0938557	-0.23775
52.5996	0.0989292	-0.251272
52.7002	0.102662	-0.266199
52.7998	0.105241	-0.282383
52.9004	0.106861	-0.299669
53	0.107743	-0.317801
53.0996	0.108073	-0.336503
53.2002	0.107948	-0.355445
53.2998	0.107469	-0.374286
53.4004	0.106734	-0.392756
53.5	0.105837	-0.410469
53.5996	0.104842	-0.427109
53.7002	0.103746	-0.44239
53.7998	0.102572	-0.456086
53.9004	0.101321	-0.468034
54	0.0999993	-0.478123
54.0996	0.0985782	-0.48627
54.2002	0.0970133	-0.492518
54.2998	0.0953266	-0.49692
54.4004	0.0934994	-0.499631
54.5	0.0915128	-0.50082
54.5996	0.0893202	-0.500666
54.7002	0.0868679	-0.499474
54.7998	0.0840993	-0.49737
54.9004	0.0809804	-0.494586
55	0.0774221	-0.491301
55.0996	0.0733227	-0.487701
55.2002	0.0685415	-0.483874
55.2998	0.0629786	-0.479874
55.4004	0.0565189	-0.475741
55.5	0.0490435	-0.471441
55.5996	0.0404541	-0.466926
55.7002	0.0306399	-0.462176
55.7998	0.0195581	-0.457053
55.9004	0.00714274	-0.45151
56	-0.00664223	-0.445474
56.0996	-0.0217933	-0.43885
56.2002	-0.0382547	-0.431534
56.2998	-0.0559282	-0.423467
56.4004	-0.0747256	-0.414647
56.5	-0.0944558	-0.405071
56.5996	-0.114911	-0.394754
56.7002	-0.135883	-0.383767
56.7998	-0.157141	-0.372119
56.9004	-0.178425	-0.359929
57	-0.199492	-0.347253
57.0996	-0.22013	-0.334202
57.2002	-0.240122	-0.320918
57.2998	-0.25924	-0.307514
57.4004	-0.277285	-0.294118
57.5	-0.294058	-0.280783
57.5996	-0.3094	-0.267637
57.7002	-0.323213	-0.25481
57.7998	-0.335413	-0.242424
57.9004	-0.345951	-0.230624
58	-0.354792	-0.219537
58.0996	-0.361921	-0.209266
58.2002	-0.367366	-0.199921
58.2998	-0.371198	-0.191597
58.4004	-0.373528	-0.184409
58.5	-0.374505	-0.178489
58.5996	-0.374274	-0.173882
58.7002	-0.372983	-0.170676
58.7998	-0.370817	-0.16891
58.9004	-0.367955	-0.168612
59	-0.364643	-0.169772
59.0996	-0.361088	-0.172359
59.2002	-0.357495	-0.176346
59.2998	-0.354077	-0.181664
59.4004	-0.350988	-0.188226
59.5	-0.348394	-0.195939
59.5996	-0.346408	-0.204656
59.7002	-0.345172	-0.214226
59.7998	-0.34481	-0.224399
59.9004	-0.345387	-0.234996
60	-0.346978	-0.245826
60.0996	-0.349619	-0.256639
60.2002	-0.353344	-0.267163
60.2998	-0.358181	-0.277121
60.4004	-0.364085	-0.286308
60.5	-0.37103	-0.294489
60.5996	-0.378964	-0.301409
60.7002	-0.387846	-0.306868
60.7998	-0.397626	-0.310677
60.9004	-0.408231	-0.31277
61	-0.419614	-0.313051
61.0996	-0.431646	-0.311521
61.2002	-0.444215	-0.308207
61.2998	-0.457248	-0.303247
61.4004	-0.47067	-0.296828
61.5	-0.484396	-0.289211
61.5996	-0.498322	-0.280713
61.7002	-0.512321	-0.2717
61.7998	-0.526316	-0.262551
61.9004	-0.540176	-0.253641
62	-0.553845	-0.24537
62.0996	-0.567197	-0.238073
62.2002	-0.580085	-0.232039
62.2998	-0.592429	-0.227565
62.4004	-0.604086	-0.224837
62.5	-0.614911	-0.224035
62.5996	-0.624754	-0.225215
62.7002	-0.633474	-0.228354
62.7998	-0.640973	-0.233447
62.9004	-0.647173	-0.240357
63	-0.652026	-0.248934
63.0996	-0.655484	-0.258939
63.2002	-0.657528	-0.270171
63.2998	-0.658194	-0.282358
63.4004	-0.657577	-0.295259
63.5	-0.655793	-0.308631
63.5996	-0.652974	-0.3222
63.7002	-0.649294	-0.33572
63.7998	-0.644951	-0.348982
63.9004	-0.640103	-0.361736
64	-0.634926	-0.373797
64.0996	-0.629596	-0.384988
64.2002	-0.624257	-0.395188
64.2998	-0.619058	-0.404217
64.4004	-0.614086	-0.411942
64.5	-0.609426	-0.418233
64.5996	-0.605065	-0.422991
64.7002	-0.600968	-0.42618
64.7998	-0.597089	-0.427763
64.9004	-0.593295	-0.427728
65	-0.589477	-0.42604
65.0996	-0.585493	-0.422712
65.2002	-0.581194	-0.417783
65.2998	-0.576446	-0.411363
65.4004	-0.571109	-0.403624
65.5	-0.565057	-0.394719
65.5996	-0.558189	-0.384834
65.7002	-0.550439	-0.37418
65.7998	-0.541819	-0.363008
65.9004	-0.532338	-0.351655
66	-0.522026	-0.340424
66.0996	-0.510979	-0.329712
66.2002	-0.499293	-0.319884
66.2998	-0.487185	-0.311306
66.4004	-0.474843	-0.304321
66.5	-0.46248	-0.299241
66.5996	-0.450321	-0.296417
66.7002	-0.438602	-0.296098
66.7998	-0.427518	-0.298496
66.9004	-0.417277	-0.30374
67	-0.408048	-0.31187
67.0996	-0.399989	-0.322813
67.2002	-0.393179	-0.336418
67.2998	-0.38767	-0.352467
67.4004	-0.383462	-0.370663
67.5	-0.380555	-0.390617
67.5996	-0.378875	-0.411897
67.7002	-0.378262	-0.434005
67.7998	-0.37853	-0.456477
67.9004	-0.379451	-0.478745
68	-0.380803	-0.500261
68.0996	-0.382358	-0.520541
68.2002	-0.383873	-0.539202
68.2998	-0.385081	-0.555891
68.4004	-0.385784	-0.570307
68.5	-0.385777	-0.582237
68.5996	-0.384908	-0.591568
68.7002	-0.383017	-0.59825
68.7998	-0.37998	-0.602358
68.9004	-0.37578	-0.604025
69	-0.370398	-0.603466
69.0996	-0.363884	-0.600937
69.2002	-0.356298	-0.596749
69.2998	-0.347757	-0.591227
69.4004	-0.338426	-0.584773
69.5	-0.328471	-0.577751
69.5996	-0.318086	-0.570493
69.7002	-0.307465	-0.563309
69.7998	-0.296793	-0.556457
69.9004	-0.286266	-0.550226
70	-0.275942	-0.544774
70.0996	-0.265973	-0.540249
70.2002	-0.256464	-0.536702
70.2998	-0.247486	-0.534109
70.4004	-0.239085	-0.532469
70.5	-0.231255	-0.531632
70.5996	-0.223986	-0.531459
70.7002	-0.217238	-0.531739
70.7998	-0.210974	-0.532272
70.9004	-0.205151	-0.532859
71	-0.199752	-0.533246
71.0996	-0.194789	-0.533229
71.2002	-0.190236	-0.532622
71.2998	-0.186152	-0.531335
71.4004	-0.182602	-0.529282
71.5	-0.179636	-0.526375
71.5996	-0.177306	-0.522618
71.7002	-0.175671	-0.518033
71.7998	-0.174767	-0.512721
71.9004	-0.174643	-0.506878
72	-0.175273	-0.500624
72.0996	-0.176632	-0.494183
72.2002	-0.178654	-0.487766
72.2998	-0.181153	-0.48161
72.4004	-0.183954	-0.475946
72.5	-0.186814	-0.470965
72.5996	-0.189463	-0.466827
72.7002	-0.191616	-0.463631
72.7998	-0.192959	-0.461496
72.9004	-0.193207	-0.460476
73	-0.19201	-0.460598
73.0996	-0.189109	-0.461867
73.2002	-0.184325	-0.464209
73.2998	-0.177509	-0.467512
73.4004	-0.168574	-0.471706
73.5	-0.157474	-0.476677
73.5996	-0.144265	-0.482285
73.7002	-0.129065	-0.488368
73.7998	-0.112073	-0.494764
73.9004	-0.093546	-0.501325
74	-0.0738098	-0.507893
74.0996	-0.053221	-0.514311
74.2002	-0.0321548	-0.520416
74.2998	-0.0109399	-0.526078
74.4004	0.0100657	-0.531206
74.5	0.0305167	-0.535691
74.5996	0.0501065	-0.539446
74.7002	0.0685778	-0.542403
74.7998	0.0857067	-0.544493
74.9004	0.101378	-0.545774
75	0.115503	-0.546252
75.0996	0.128054	-0.545992
75.2002	0.139064	-0.545076
75.2998	0.14865	-0.543615
75.4004	0.156915	-0.541745
75.5	0.164033	-0.539661
75.5996	0.170174	-0.537526
75.7002	0.175508	-0.535566
75.7998	0.180206	-0.533941
75.9004	0.18443	-0.53287
76	0.188284	-0.532527
76.0996	0.191863	-0.533066
76.2002	0.195212	-0.534563
76.2998	0.198367	-0.537048
76.4004	0.201314	-0.540562
76.5	0.203985	-0.54509
76.5996	0.206281	-0.550553
76.7002	0.208043	-0.556846
76.7998	0.209106	-0.563791
76.9004	0.209335	-0.571221
77	0.208564	-0.578914
77.0996	0.206647	-0.586641
77.2002	0.203449	-0.594161
77.2998	0.198925	-0.601184
77.4004	0.193021	-0.607504
77.5	0.185717	-0.612876
77.5996	0.17707	-0.617129
77.7002	0.167167	-0.620091
77.7998	0.156138	-0.621619
77.9004	0.144195	-0.62161
78	0.131529	-0.619951
78.0996	0.118433	-0.616609
78.2002	0.105196	-0.61159
78.2998	0.0921409	-0.604879
78.4004	0.0795868	-0.596507
78.5	0.0678002	-0.5865
78.5996	0.0570408	-0.574894
78.7002	0.0475608	-0.561762
78.7998	0.0395427	-0.547164
78.9004	0.0331799	-0.531205
79	0.0286002	-0.513963
79.0996	0.025875	-0.49555
79.2002	0.0250149	-0.47604
79.2998	0.0259751	-0.455522
79.4004	0.0287122	-0.434155
79.5	0.0331052	-0.412106
79.5996	0.0390098	-0.389546
79.7002	0.0462854	-0.366693
79.7998	0.0547425	-0.343795
79.9004	0.064213	-0.321075
80	0.0744664	-0.298812
80.0996	0.0852896	-0.277208
80.2002	0.0964171	-0.256557
80.2998	0.107607	-0.237089
80.4004	0.118655	-0.219105
80.5	0.129273	-0.202847
80.5996	0.139224	-0.188516
80.7002	0.148255	-0.176287
80.7998	0.156155	-0.166299
80.9004	0.162733	-0.158693
81	0.167749	-0.153518
81.0996	0.171062	-0.150782
81.2002	0.172573	-0.150471
81.2998	0.172241	-0.152488
81.4004	0.170037	-0.156702
81.5	0.16599	-0.162931
81.5996	0.160225	-0.170962
81.7002	0.152918	-0.180571
81.7998	0.144293	-0.19147
81.9004	0.134595	-0.203353
82	0.124076	-0.215904
82.0996	0.11306	-0.228788
82.2002	0.101851	-0.241673
82.2998	0.0907586	-0.254215
82.4004	0.0800561	-0.266112
82.5	0.0699871	-0.27705
82.5996	0.0607769	-0.286755
82.7002	0.0526307	-0.295016
82.7998	0.0456721	-0.301637
82.9004	0.0399448	-0.306467
83	0.0354911	-0.309421
83.0996	0.0322981	-0.310483
83.2002	0.0302997	-0.309608
83.2998	0.0293927	-0.306831
83.4004	0.0295515	-0.302253
83.5	0.0306696	-0.296017
83.5996	0.0325821	-0.288311
83.7002	0.0351552	-0.279316
83.7998	0.0382684	-0.269215
83.9004	0.0418013	-0.258176
84	0.0456669	-0.246401
84.0996	0.049751	-0.234065
84.2002	0.0539448	-0.221348
84.2998	0.0580937	-0.20844
84.4004	0.0621611	-0.19549
84.5	0.0660497	-0.182581
84.5996	0.0697169	-0.169801
84.7002	0.0731087	-0.15723
84.7998	0.0761556	-0.14488
84.9004	0.0787611	-0.132845
85	0.0808357	-0.121173
85.0996	0.0823062	-0.109876
85.2002	0.0831326	-0.0990133
85.2998	0.083247	-0.0886014
85.4004	0.0826252	-0.07866
85.5	0.0812566	-0.0692403
85.5996	0.0791179	-0.0603832
85.7002	0.0762722	-0.0521946
85.7998	0.0727788	-0.0447339
85.9004	0.0687372	-0.0380884
86	0.064272	-0.0323694
86.0996	0.0595193	-0.0276827
86.2002	0.0546899	-0.0241309
86.2998	0.049981	-0.0217948
86.4004	0.0456047	-0.0207764
86.5	0.041788	-0.0211795
86.5996	0.0387619	-0.0231142
86.7002	0.0367297	-0.0266072
86.7998	0.0358818	-0.0317035
86.9004	0.0363353	-0.0384352
87	0.0382063	-0.0467972
87.0996	0.0415631	-0.0567761
87.2002	0.046425	-0.068351
87.2998	0.0527635	-0.0814615
87.4004	0.0604974	-0.096083
87.5	0.0694423	-0.112102
87.5996	0.0794329	-0.129398
87.7002	0.0902681	-0.147849
87.7998	0.101696	-0.167311
87.9004	0.11349	-0.187646
88	0.125415	-0.208664
88.0996	0.137244	-0.23017
88.2002	0.148766	-0.251939
88.2998	0.159816	-0.273768
88.4004	0.170256	-0.295409
88.5	0.179992	-0.31662
88.5996	0.188948	-0.33716
88.7002	0.197127	-0.356778
88.7998	0.204541	-0.375188
88.9004	0.21126	-0.392154
89	0.217397	-0.407465
89.0996	0.223074	-0.420964
89.2002	0.228426	-0.432536
89.2998	0.233628	-0.44211
89.4004	0.238804	-0.449667
89.5	0.244103	-0.455209
89.5996	0.249609	-0.458814
89.7002	0.255423	-0.460607
89.7998	0.261566	-0.460793
89.9004	0.268074	-0.459578
90	0.274955	-0.457184
90.0996	0.282158	-0.453873
90.2002	0.289583	-0.449933
90.2998	0.297091	-0.445583
90.4004	0.304536	-0.441064
90.5	0.311763	-0.43661
90.5996	0.318543	-0.432388
90.7002	0.32469	-0.428562
90.7998	0.330043	-0.425239
90.9004	0.334504	-0.422525
91	0.337904	-0.420444
91.0996	0.340074	-0.419006
91.2002	0.340911	-0.418247
91.2998	0.340312	-0.418173
91.4004	0.338187	-0.418803
91.5	0.33453	-0.420113
91.5996	0.32936	-0.422162
91.7002	0.3227	-0.425002
91.7998	0.314548	-0.42874
91.9004	0.304963	-0.433532
92	0.294031	-0.439463
92.0996	0.281876	-0.4467
92.2002	0.268661	-0.45536
92.2998	0.254535	-0.465588
92.4004	0.239628	-0.47753
92.5	0.224166	-0.491298
92.5996	0.208382	-0.506959
92.7002	0.192538	-0.524493
92.7998	0.176938	-0.543851
92.9004	0.161917	-0.564869
93	0.1478	-0.587347
93.0996	0.134903	-0.610992
93.2002	0.123511	-0.635371
93.2998	0.113983	-0.660064
93.4004	0.106601	-0.68457
93.5	0.101615	-0.708319
93.5996	0.0992602	-0.730677
93.7002	0.0996889	-0.750994
93.7998	0.102992	-0.768679
93.9004	0.10918	-0.783202
94	0.118208	-0.794058
94.0996	0.129948	-0.800815
94.2002	0.144182	-0.803214
94.2998	0.160633	-0.801082
94.4004	0.178949	-0.794429
94.5	0.198716	-0.78336
94.5996	0.219439	-0.768108
94.7002	0.240591	-0.74907
94.7998	0.261616	-0.726717
94.9004	0.28196	-0.701688
95	0.30109	-0.674632
95.0996	0.318437	-0.646288
95.2002	0.333517	-0.617384
95.2998	0.345862	-0.588629
95.4004	0.355112	-0.560706
95.5	0.361017	-0.534254
95.5996	0.363379	-0.509833
95.7002	0.362133	-0.48786
95.7998	0.35733	-0.468674
95.9004	0.349109	-0.452502
96	0.337752	-0.439419
96.0996	0.323664	-0.429447
96.2002	0.307326	-0.422412
96.2998	0.28929	-0.418057
96.4004	0.270182	-0.416108
96.5	0.250689	-0.416176
96.5996	0.231531	-0.417834
96.7002	0.213376	-0.420615
96.7998	0.196856	-0.424057
96.9004	0.182533	-0.427699
97	0.170887	-0.431067
97.0996	0.162315	-0.433758
97.2002	0.157082	-0.435365
97.2998	0.155339	-0.435564
97.4004	0.157155	-0.434092
97.5	0.162424	-0.430755
97.5996	0.170972	-0.425438
97.7002	0.18251	-0.418061
97.7998	0.196706	-0.408594
97.9004	0.213123	-0.397114
98	0.231354	-0.383727
98.0996	0.250973	-0.368571
98.2002	0.271566	-0.351845
98.2998	0.29278	-0.333765
98.4004	0.314266	-0.314613
98.5	0.33573	-0.294627
98.5996	0.356944	-0.274102
98.7002	0.377721	-0.253296
98.7998	0.397928	-0.232467
98.9004	0.417455	-0.211904
99	0.436271	-0.191847
99.0996	0.454342	-0.172509
99.2002	0.471594	-0.15408
99.2998	0.487987	-0.13669
99.4004	0.503399	-0.120482
99.5	0.51771	-0.105498
99.5996	0.530735	-0.0917648
99.7002	0.542307	-0.0793195
99.7998	0.552198	-0.0681695
99.9004	0.560145	-0.0583616
100	0.565883	-0.0498674
100.1	0.569104	-0.0426683
100.2	0.569564	-0.0368305
100.3	0.567035	-0.032371
100.4	0.561349	-0.0293771
100.5	0.552365	-0.0279344
100.6	0.540013	-0.0281744
100.7	0.524314	-0.0302836
100.8	0.505348	-0.0344167
100.9	0.483324	-0.040786
101	0.458491	-0.049498
101.1	0.431193	-0.0607763
101.2	0.401845	-0.074755
101.3	0.370871	-0.0914847
101.4	0.338786	-0.110987
101.5	0.306044	-0.133217
101.6	0.273157	-0.158066
101.7	0.240589	-0.185341
101.8	0.208827	-0.214776
101.9	0.178247	-0.24601
102	0.14918	-0.278648
102.1	0.121909	-0.312185
102.2	0.0966653	-0.346114
102.3	0.0736339	-0.379917
102.4	0.0529455	-0.413051
102.5	0.0346553	-0.445024
102.6	0.0188123	-0.475328
102.7	0.00541802	-0.503516
102.8	-0.00554741	-0.52923
102.9	-0.0140613	-0.552177
103	-0.020172	-0.572161
103.1	-0.0238872	-0.588981
103.2	-0.0252442	-0.602654
103.3	-0.0242382	-0.613252
103.4	-0.0208759	-0.620962
103.5	-0.0151368	-0.625998
103.6	-0.00700921	-0.62865
103.7	0.00350128	-0.629279
103.8	0.0163448	-0.628231
103.9	0.0314811	-0.625938
104	0.0488064	-0.622855
104.1	0.0681897	-0.619393
104.2	0.0894591	-0.616034
104.3	0.112415	-0.613092
104.4	0.136818	-0.610904
104.5	0.162373	-0.609724
104.6	0.188731	-0.609787
104.7	0.215549	-0.611243
104.8	0.242432	-0.614156
104.9	0.269029	-0.618582
105	0.294975	-0.624435
105.1	0.319924	-0.631596
105.2	0.343535	-0.639893
105.3	0.365525	-0.649111
105.4	0.385617	-0.659056
105.5	0.403596	-0.669421
105.6	0.419319	-0.679904
105.7	0.432666	-0.690195
105.8	0.443614	-0.700023
105.9	0.452128	-0.709143
106	0.458223	-0.717332
106.1	0.46197	-0.724374
106.2	0.463519	-0.730089
106.3	0.463027	-0.734365
106.4	0.460662	-0.737126
106.5	0.456613	-0.738349
106.6	0.4511	-0.738069
106.7	0.44433	-0.736339
106.8	0.436538	-0.733237
106.9	0.427955	-0.72888
107	0.418776	-0.723381
107.1	0.409212	-0.716837
107.2	0.399443	-0.709358
107.3	0.38967	-0.701072
107.4	0.380076	-0.692108
107.5	0.370819	-0.682596
107.6	0.362025	-0.67264
107.7	0.353779	-0.662298
107.8	0.346161	-0.651641
107.9	0.339235	-0.640752
108	0.333065	-0.629748
108.1	0.327696	-0.618753
108.2	0.323142	-0.607877
108.3	0.319432	-0.597277
108.4	0.316594	-0.587106
108.5	0.314613	-0.577549
108.6	0.313461	-0.568775
108.7	0.313116	-0.560925
108.8	0.313547	-0.554142
108.9	0.314706	-0.548571
109	0.316488	-0.544342
109.1	0.318787	-0.541523
109.2	0.321473	-0.540131
109.3	0.324396	-0.540131
109.4	0.327391	-0.541478
109.5	0.330268	-0.544033
109.6	0.33281	-0.547658
109.7	0.334765	-0.552125
109.8	0.335888	-0.557188
109.9	0.335988	-0.562599
110	0.33488	-0.568048
110.1	0.332384	-0.57326
110.2	0.328379	-0.577955
110.3	0.322777	-0.581892
110.4	0.315568	-0.584843
110.5	0.306767	-0.58661
110.6	0.296446	-0.587051
110.7	0.284769	-0.586091
110.8	0.27194	-0.583703
110.9	0.258181	-0.579927
111	0.24378	-0.574841
111.1	0.229035	-0.568629
111.2	0.214239	-0.561443
111.3	0.199675	-0.553508
111.4	0.185588	-0.545085
111.5	0.17217	-0.536478
111.6	0.159609	-0.52793
111.7	0.148048	-0.519679
111.8	0.137613	-0.511963
111.9	0.128369	-0.504984
112	0.120401	-0.498868
112.1	0.113679	-0.493701
112.2	0.108195	-0.489502
112.3	0.103923	-0.486308
112.4	0.100848	-0.484053
112.5	0.0989721	-0.482637
112.6	0.0982572	-0.481899
112.7	0.0987198	-0.481701
112.8	0.100375	-0.48185
112.9	0.103223	-0.482192
113	0.107285	-0.482557
113.1	0.11254	-0.482784
113.2	0.119018	-0.482747
113.3	0.126702	-0.482296
113.4	0.135561	-0.48133
113.5	0.145484	-0.479739
113.6	0.156307	-0.477483
113.7	0.16792	-0.474551
113.8	0.180084	-0.470897
113.9	0.192637	-0.466548
114	0.20531	-0.461485
114.1	0.217867	-0.455818
114.2	0.230089	-0.449627
114.3	0.241789	-0.443003
114.4	0.252828	-0.436104
114.5	0.263058	-0.42909
114.6	0.272392	-0.422164
114.7	0.280846	-0.415556
114.8	0.288452	-0.409525
114.9	0.295312	-0.404315
115	0.301607	-0.400161
115.1	0.307513	-0.39731
115.2	0.313263	-0.395975
115.3	0.319065	-0.396285
115.4	0.32514	-0.398339
115.5	0.331704	-0.402145
115.6	0.338938	-0.407683
115.7	0.346974	-0.414794
115.8	0.355931	-0.423288
115.9	0.365869	-0.432895
116	0.376733	-0.443232
116.1	0.388476	-0.45386
116.2	0.401002	-0.464331
116.3	0.414127	-0.474144
116.4	0.427601	-0.482875
116.5	0.441197	-0.489999
116.6	0.454667	-0.495103
116.7	0.467728	-0.497849
116.8	0.48009	-0.497949
116.9	0.49151	-0.495185
117	0.501738	-0.489413
117.1	0.510517	-0.480595
117.2	0.51767	-0.468863
117.3	0.523046	-0.45438
117.4	0.526515	-0.437429
117.5	0.528005	-0.418327
117.6	0.527454	-0.39744
117.7	0.524881	-0.375177
117.8	0.520314	-0.351978
117.9	0.513821	-0.328308
118	0.505477	-0.304574
118.1	0.495421	-0.28118
118.2	0.483766	-0.258486
118.3	0.470637	-0.236733
118.4	0.456154	-0.216185
118.5	0.440512	-0.196948
118.6	0.423815	-0.179116
118.7	0.406174	-0.16268
118.8	0.387654	-0.1476
118.9	0.368334	-0.133793
119	0.348275	-0.121125
119.1	0.327541	-0.109479
119.2	0.306191	-0.098678
119.3	0.284335	-0.088566
119.4	0.262022	-0.079018
119.5	0.239355	-0.0698701
119.6	0.216438	-0.0610521
119.7	0.193423	-0.0524615
119.8	0.170494	-0.0440491
119.9	0.14784	-0.0358062
120	0.125721	-0.0277058
120.1	0.104462	-0.0197323
120.2	0.0843511	-0.011857
120.3	0.0656733	-0.004053
120.4	0.048697	0.00367208
120.5	0.0337094	0.0113428
120.6	0.0209759	0.0190202
120.7	0.0106763	0.0268115
120.8	0.00293854	0.0348125
120.9	-0.00215022	0.0430907
121	-0.00459314	0.0517184
121.1	-0.00447402	0.0608087
121.2	-0.00195675	0.0704902
121.3	0.00276671	0.0808916
121.4	0.00945964	0.0920671
121.5	0.0178366	0.104088
121.6	0.0275655	0.116996
121.7	0.0382652	0.130784
121.8	0.0496358	0.145416
121.9	0.0613513	0.160833
122	0.0731877	0.176974
122.1	0.0848983	0.193734
122.2	0.0963205	0.210914
122.3	0.107306	0.228359
122.4	0.117774	0.245813
122.5	0.127702	0.263093
122.6	0.13712	0.280013
122.7	0.146039	0.296327
122.8	0.154492	0.311882
122.9	0.162531	0.326408
123	0.17016	0.339726
123.1	0.177409	0.351632
123.2	0.184274	0.362016
123.3	0.19071	0.370771
123.4	0.196634	0.377786
123.5	0.201908	0.383035
123.6	0.20644	0.386492
123.7	0.210106	0.388197
123.8	0.212773	0.388257
123.9	0.214293	0.386776
124	0.214561	0.383911
124.1	0.213542	0.379853
124.2	0.211196	0.374826
124.3	0.207567	0.369096
124.4	0.20274	0.362957
124.5	0.196821	0.356632
124.6	0.189994	0.350392
124.7	0.182497	0.34449
124.8	0.174616	0.339164
124.9	0.166628	0.334575
125	0.158837	0.330885
125.1	0.151606	0.328173
125.2	0.145192	0.326474
125.3	0.139863	0.325763
125.4	0.135895	0.325941
125.5	0.133447	0.326874
125.6	0.132632	0.32835
125.7	0.133562	0.330083
125.8	0.136304	0.331857
125.9	0.140842	0.333346
126	0.147122	0.334302
126.1	0.155037	0.334482
126.2	0.164486	0.333661
126.3	0.175339	0.331666
126.4	0.187431	0.328304
126.5	0.200538	0.3235
126.6	0.214486	0.31722
126.7	0.22904	0.309491
126.8	0.244019	0.300439
126.9	0.259262	0.290127
127	0.274551	0.27876
127.1	0.289668	0.266546
127.2	0.304427	0.253712
127.3	0.318625	0.240492
127.4	0.332108	0.227108
127.5	0.34468	0.213809
127.6	0.35622	0.200818
127.7	0.366556	0.188315
127.8	0.375519	0.176505
127.9	0.383026	0.165485
128	0.388971	0.155389
128.1	0.393306	0.146257
128.2	0.395992	0.13807
128.3	0.39702	0.130806
128.4	0.396408	0.124371
128.5	0.394168	0.118689
128.6	0.390348	0.113633
128.7	0.385019	0.109021
128.8	0.378272	0.104696
128.9	0.370166	0.100502
129	0.360813	0.0962711
129.1	0.350315	0.0918363
129.2	0.338772	0.0870745
129.3	0.326268	0.0818923
129.4	0.312942	0.0762698
129.5	0.298948	0.0702224
129.6	0.284466	0.0637897
129.7	0.269703	0.0570995
129.8	0.25486	0.0502946
129.9	0.240162	0.0435415
130	0.225875	0.0370473
130.1	0.212213	0.0310228
130.2	0.199402	0.0256649
130.3	0.187676	0.0211679
130.4	0.177223	0.0176726
130.5	0.168246	0.0152496
130.6	0.160842	0.0139081
130.7	0.15509	0.0136147
130.8	0.15099	0.0142618
130.9	0.148495	0.015696
131	0.147494	0.0176952
131.1	0.147805	0.0200287
131.2	0.149193	0.0224389
131.3	0.151405	0.0246764
131.4	0.154176	0.0264577
131.5	0.157194	0.0275471
131.6	0.160127	0.0277791
131.7	0.16271	0.0270175
131.8	0.164655	0.0251965
131.9	0.165795	0.0222843
132	0.165927	0.0183746
132.1	0.164946	0.0136318
132.2	0.162784	0.00821427
132.3	0.159482	0.00233879
132.4	0.155139	-0.00376966
132.5	0.149873	-0.00985188
132.6	0.143806	-0.015678
132.7	0.137129	-0.0210564
132.8	0.130058	-0.0258161
132.9	0.122833	-0.0298236
133	0.115673	-0.0329652
133.1	0.108735	-0.0351803
133.2	0.102223	-0.0364388
133.3	0.09626	-0.0368159
133.4	0.0909489	-0.0363974
133.5	0.0863983	-0.0352579
133.6	0.0826239	-0.0334604
133.7	0.0795177	-0.0311212
133.8	0.0769636	-0.0283631
133.9	0.0748821	-0.0252638
134	0.0731119	-0.0219256
134.1	0.0714809	-0.018401
134.2	0.0698205	-0.0147538
134.3	0.0679473	-0.0110721
134.4	0.0657218	-0.00736433
134.5	0.0630585	-0.00366853
134.6	0.0598329	1.39195e-05
134.7	0.0560086	0.00365107
134.8	0.0515681	0.00718073
134.9	0.0465756	0.0105632
135	0.0411266	0.0137479
135.1	0.0353991	0.0166874
135.2	0.0295348	0.0193475
135.3	0.0237234	0.0217404
135.4	0.0181944	0.0238254
135.5	0.0131369	0.025623
135.6	0.00874266	0.0271282
135.7	0.00519968	0.0283902
135.8	0.00265699	0.029478
135.9	0.00117203	0.030451
136	0.000766059	0.0313664
136.1	0.00147588	0.0323018
136.2	0.0032749	0.0333459
136.3	0.00606421	0.0345243
136.4	0.00970954	0.0358478
136.5	0.0140829	0.0372839
136.6	0.0190204	0.0387838
136.7	0.0243723	0.0402686
136.8	0.0299916	0.0416014
136.9	0.0357475	0.0425978
137	0.0415132	0.0430988
137.1	0.0472012	0.0429361
137.2	0.0527834	0.0419512
137.3	0.0582249	0.0399901
137.4	0.0634738	0.0369167
137.5	0.0685262	0.0327519
137.6	0.0733879	0.0275284
137.7	0.0781023	0.0213332
137.8	0.0826678	0.0143057
137.9	0.0870789	0.00665706
138	0.091386	-0.00132488
138.1	0.0955963	-0.00931207
138.2	0.0997485	-0.0168982
138.3	0.10387	-0.023714
138.4	0.107989	-0.0293809
138.5	0.112153	-0.0335196
138.6	0.116445	-0.0357604
138.7	0.120969	-0.0357658
138.8	0.125829	-0.0332356
138.9	0.131168	-0.0279896
139	0.137167	-0.0198692
139.1	0.143994	-0.00877624
139.2	0.151871	0.00529459
139.3	0.160935	0.0223855
139.4	0.171331	0.0424049
139.5	0.183146	0.0651775
139.6	0.19644	0.0904945
139.7	0.211174	0.118144
139.8	0.227266	0.147842
139.9	0.2445	0.179259
140	0.262604	0.211999
140.1	0.281183	0.245627
140.2	0.299815	0.279721
140.3	0.317989	0.313845
140.4	0.335108	0.347512
140.5	0.350561	0.380295
140.6	0.363765	0.411761
140.7	0.374079	0.441507
140.8	0.380946	0.46917
140.9	0.383923	0.494421
141	0.382688	0.517031
141.1	0.377018	0.536841
141.2	0.366826	0.553828
141.3	0.352171	0.56806
141.4	0.333219	0.579626
141.5	0.310335	0.588753
141.6	0.284011	0.595694
141.7	0.254918	0.600849
141.8	0.223788	0.604624
141.9	0.191319	0.607432
142	0.158368	0.609708
142.1	0.125779	0.611887
142.2	0.0943687	0.614382
142.3	0.0648809	0.617577
142.4	0.0379752	0.621688
142.5	0.014199	0.626877
142.6	-0.00596854	0.633223
142.7	-0.0222359	0.640746
142.8	-0.0344555	0.649375
142.9	-0.0426439	0.65894
143	-0.0469423	0.669181
143.1	-0.0475957	0.679798
143.2	-0.044958	0.690451
143.3	-0.0395179	0.7008
143.4	-0.0318176	0.710499
143.5	-0.022426	0.719268
143.6	-0.0119658	0.726888
143.7	-0.0010172	0.733191
143.8	0.00984688	0.738089
143.9	0.0201303	0.741554
144	0.0293168	0.743646
144.1	0.0370185	0.744484
144.2	0.0429598	0.744277
144.3	0.0469827	0.743324
144.4	0.0489744	0.7419
144.5	0.0489169	0.740405
144.6	0.0468926	0.739159
144.7	0.0430354	0.738455
144.8	0.037583	0.738592
144.9	0.0307942	0.739802
145	0.0229748	0.742339
145.1	0.014476	0.746347
145.2	0.00558956	0.751914
145.3	-0.00332748	0.759131
145.4	-0.0119688	0.767923
145.5	-0.0200171	0.77818
145.6	-0.0272232	0.789804
145.7	-0.0334117	0.802635
145.8	-0.0383648	0.816473
145.9	-0.041924	0.831019
146	-0.0440027	0.846001
146.1	-0.0445789	0.861117
146.2	-0.0437073	0.876024
146.3	-0.0414111	0.890409
146.4	-0.0377772	0.903896
146.5	-0.0329518	0.91617
146.6	-0.0271236	0.926822
146.7	-0.0205171	0.9355
146.8	-0.0134034	0.941855
146.9	-0.00613263	0.945583
147	0.000952504	0.946436
147.1	0.00750644	0.944168
147.2	0.0131583	0.938596
147.3	0.017566	0.929584
147.4	0.0203864	0.917133
147.5	0.0213294	0.901345
147.6	0.0201123	0.882379
147.7	0.0165217	0.860482
147.8	0.0104504	0.836038
147.9	0.00187676	0.809451
148	-0.00915553	0.781271
148.1	-0.0225157	0.752098
148.2	-0.0379964	0.722513
148.3	-0.0552881	0.693134
148.4	-0.0739196	0.664536
148.5	-0.0933762	0.637283
148.6	-0.113105	0.611837
148.7	-0.132556	0.588586
148.8	-0.151195	0.567818
148.9	-0.168478	0.549675
149	-0.183886	0.534218
149.1	-0.196921	0.521401
149.2	-0.207211	0.511045
149.3	-0.214449	0.502928
149.4	-0.218409	0.496724
149.5	-0.21902	0.492082
149.6	-0.216274	0.488651
149.7	-0.210322	0.486038
149.8	-0.2014	0.483952
149.9	-0.189757	0.482086
150	-0.175818	0.480279
150.1	-0.160012	0.478387
150.2	-0.142856	0.476338
150.3	-0.124837	0.474154
150.4	-0.10647	0.4719
150.5	-0.0882217	0.469739
150.6	-0.0705555	0.467819
150.7	-0.0538773	0.466288
150.8	-0.038541	0.465318
150.9	-0.0248353	0.46504
151	-0.0129613	0.465568
151.1	-0.00312147	0.466977
151.2	0.00458603	0.469249
151.3	0.0101629	0.472271
151.4	0.0136743	0.475892
151.5	0.0152095	0.479879
151.6	0.0149318	0.483949
151.7	0.0130248	0.487789
151.8	0.00972684	0.491079
151.9	0.0052688	0.493482
152	-8.91249e-05	0.494719
152.1	-0.0060946	0.49452
152.2	-0.01248	0.492699
152.3	-0.0189957	0.489078
152.4	-0.0253749	0.483619
152.5	-0.0314171	0.476304
152.6	-0.0369314	0.467302
152.7	-0.0417233	0.456857
152.8	-0.0456392	0.445229
152.9	-0.0484951	0.432772
153	-0.0502114	0.419877
153.1	-0.0506584	0.406951
153.2	-0.0497201	0.394411
153.3	-0.0473437	0.382655
153.4	-0.0434328	0.372092
153.5	-0.0379479	0.363052
153.6	-0.0308218	0.355862
153.7	-0.0220318	0.350745
153.8	-0.0115912	0.347881
153.9	0.000473166	0.347355
154	0.0140695	0.349169
154.1	0.0291317	0.353271
154.2	0.0455419	0.359503
154.3	0.063096	0.367649
154.4	0.0815886	0.377379
154.5	0.100768	0.388335
154.6	0.120335	0.400176
154.7	0.13997	0.412528
154.8	0.159354	0.424956
154.9	0.178176	0.436988
155	0.19608	0.44815
155.1	0.212731	0.458067
155.2	0.227807	0.466349
155.3	0.24102	0.472657
155.4	0.252148	0.476678
155.5	0.261015	0.478232
155.6	0.267467	0.477195
155.7	0.271411	0.473508
155.8	0.272756	0.467153
155.9	0.271503	0.458219
156	0.267708	0.446877
156.1	0.261449	0.433352
156.2	0.252842	0.41795
156.3	0.241969	0.400958
156.4	0.228951	0.382667
156.5	0.213922	0.3634
156.6	0.19704	0.343459
156.7	0.178521	0.323125
156.8	0.15851	0.302686
156.9	0.137176	0.282366
157	0.114638	0.262338
157.1	0.0910503	0.24273
157.2	0.0665584	0.2236
157.3	0.0412706	0.205027
157.4	0.0153286	0.187051
157.5	-0.0111608	0.169687
157.6	-0.0380904	0.152924
157.7	-0.0653264	0.136687
157.8	-0.0927762	0.120947
157.9	-0.12032	0.105681
158	-0.147812	0.090855
158.1	-0.175143	0.0765044
158.2	-0.202158	0.0626312
158.3	-0.228718	0.0492474
158.4	-0.254645	0.0363798
158.5	-0.279745	0.024083
158.6	-0.30379	0.0124628
158.7	-0.326547	0.00161407
158.8	-0.347787	-0.00834696
158.9	-0.36723	-0.0173059
159	-0.38464	-0.0251072
159.1	-0.399807	-0.0316085
159.2	-0.412508	-0.0366293
159.3	-0.422588	-0.0400228
159.4	-0.429947	-0.0417062
159.5	-0.434548	-0.0415195
159.6	-0.436434	-0.0393343
159.7	-0.435716	-0.035072
159.8	-0.432575	-0.0287037
159.9	-0.427267	-0.0202434
160	-0.420144	-0.00971022
160.1	-0.411633	0.00285094
160.2	-0.402207	0.0173185
160.3	-0.392408	0.0335945
160.4	-0.382774	0.0514671
160.5	-0.373818	0.0707674
160.6	-0.366068	0.0912469
160.7	-0.360006	0.112689
160.8	-0.356074	0.134848
160.9	-0.354618	0.157459
161	-0.355827	0.180295
161.1	-0.359882	0.203177
161.2	-0.36678	0.225869
161.3	-0.376439	0.248165
161.4	-0.388622	0.269848
161.5	-0.403036	0.290767
161.6	-0.419325	0.310697
161.7	-0.436996	0.329471
161.8	-0.455536	0.34695
161.9	-0.474402	0.362977
162	-0.493041	0.377421
162.1	-0.510897	0.390098
162.2	-0.527446	0.400886
162.3	-0.542208	0.409673
162.4	-0.554797	0.416364
162.5	-0.564843	0.420904
162.6	-0.572036	0.423238
162.7	-0.576135	0.42333
162.8	-0.57697	0.421238
162.9	-0.574486	0.417048
163	-0.568657	0.410967
163.1	-0.559555	0.403192
163.2	-0.547234	0.39399
163.3	-0.531814	0.383705
163.4	-0.51353	0.37267
163.5	-0.492586	0.36127
163.6	-0.469225	0.349837
163.7	-0.443736	0.338759
163.8	-0.416453	0.328443
163.9	-0.38774	0.319202
164	-0.35796	0.311358
164.1	-0.327479	0.305058
164.2	-0.296677	0.300437
164.3	-0.265956	0.297537
164.4	-0.235654	0.29633
164.5	-0.206074	0.296712
164.6	-0.177505	0.298471
164.7	-0.150194	0.301361
164.8	-0.124369	0.305087
164.9	-0.100196	0.309335
165	-0.0777822	0.313795
165.1	-0.0571639	0.318137
165.2	-0.0383261	0.322121
165.3	-0.0212326	0.325477
165.4	-0.00579273	0.327999
165.5	0.00810879	0.329602
165.6	0.0205679	0.330243
165.7	0.0316452	0.329989
165.8	0.0414659	0.328848
165.9	0.0500756	0.32692
166	0.0575894	0.324356
166.1	0.06407	0.321297
166.2	0.0695659	0.317951
166.3	0.0741429	0.314511
166.4	0.0778483	0.311078
166.5	0.0807144	0.307749
166.6	0.0827646	0.304563
166.7	0.0840796	0.301529
166.8	0.0847742	0.298621
166.9	0.0849257	0.295725
167	0.0846594	0.292713
167.1	0.0841014	0.289442
167.2	0.0833669	0.285712
167.3	0.0825819	0.281399
167.4	0.0818642	0.27631
167.5	0.0813271	0.270324
167.6	0.0810155	0.263285
167.7	0.0809224	0.255121
167.8	0.0809766	0.245802
167.9	0.08107	0.235257
168	0.0810526	0.223546
168.1	0.0806938	0.210752
168.2	0.0797406	0.19695
168.3	0.0779308	0.18229
168.4	0.0749872	0.166872
168.5	0.0706301	0.150861
168.6	0.0646261	0.134394
168.7	0.0567696	0.117615
168.8	0.0469223	0.100717
168.9	0.0350427	0.0837936
169	0.0211528	0.0669568
169.1	0.00543697	0.0502378
169.2	-0.0118923	0.0336799
169.3	-0.0304868	0.0173288
169.4	-0.0499781	0.00117435
169.5	-0.0698915	-0.0147793
169.6	-0.0896661	-0.0305314
169.7	-0.108787	-0.0461041
169.8	-0.126744	-0.0615435
169.9	-0.143069	-0.0768458
170	-0.157334	-0.0919879
170.1	-0.169178	-0.106951
170.2	-0.17836	-0.121698
170.3	-0.184726	-0.136139
170.4	-0.188223	-0.150235
170.5	-0.188974	-0.163876
170.6	-0.187165	-0.176945
170.7	-0.183111	-0.189332
170.8	-0.177181	-0.200934
170.9	-0.169787	-0.211655
171	-0.16144	-0.221455
171.1	-0.152621	-0.230246
171.2	-0.143843	-0.23798
171.3	-0.135555	-0.244652
171.4	-0.128114	-0.250284
171.5	-0.121878	-0.25495
171.6	-0.117053	-0.258673
171.7	-0.113737	-0.261591
171.8	-0.111918	-0.263825
171.9	-0.111472	-0.26552
172	-0.112229	-0.266812
172.1	-0.113902	-0.267784
172.2	-0.116096	-0.268656
172.3	-0.118352	-0.26956
172.4	-0.120196	-0.270658
172.5	-0.121192	-0.272056
172.6	-0.120859	-0.273838
172.7	-0.118767	-0.276084
172.8	-0.114506	-0.278842
172.9	-0.107762	-0.282179
173	-0.0983275	-0.286046
173.1	-0.0861193	-0.290362
173.2	-0.07114	-0.295078
173.3	-0.0535158	-0.300069
173.4	-0.0334635	-0.305199
173.5	-0.0113193	-0.310286
173.6	0.0125052	-0.315131
173.7	0.0375357	-0.319535
173.8	0.0631955	-0.323261
173.9	0.0889084	-0.326129
174	0.113992	-0.327905
174.1	0.137843	-0.328401
174.2	0.15991	-0.327477
174.3	0.179639	-0.32502
174.4	0.196544	-0.320939
174.5	0.210271	-0.315223
174.6	0.220572	-0.307882
174.7	0.227249	-0.298999
174.8	0.230223	-0.288753
174.9	0.229581	-0.277333
175	0.225501	-0.264978
175.1	0.218304	-0.251987
175.2	0.20835	-0.238716
175.3	0.196044	-0.225558
175.4	0.181887	-0.212892
175.5	0.166416	-0.201139
175.6	0.150206	-0.190639
175.7	0.13377	-0.181771
175.8	0.117582	-0.174808
175.9	0.102078	-0.169998
176	0.0876641	-0.16756
176.1	0.0746529	-0.167623
176.2	0.0633017	-0.170198
176.3	0.0537486	-0.175216
176.4	0.0460576	-0.182553
176.5	0.0402128	-0.192018
176.6	0.0361314	-0.203365
176.7	0.0337004	-0.21629
176.8	0.032746	-0.230464
176.9	0.0330568	-0.245509
177	0.0343913	-0.261028
177.1	0.0364272	-0.276602
177.2	0.0388914	-0.291901
177.3	0.0414342	-0.306608
177.4	0.0437578	-0.320491
177.5	0.0455076	-0.333299
177.6	0.0463342	-0.344833
177.7	0.0458973	-0.354949
177.8	0.0438396	-0.363518
177.9	0.0398923	-0.370484
178	0.0337289	-0.375765
178.1	0.0250828	-0.379305
178.2	0.0137034	-0.381081
178.3	-0.000552766	-0.381071
178.4	-0.0177147	-0.379256
178.5	-0.0377425	-0.375629
178.6	-0.0604783	-0.370188
178.7	-0.085715	-0.362885
178.8	-0.113132	-0.353772
178.9	-0.142251	-0.342893
179	-0.172497	-0.33028
179.1	-0.203262	-0.316079
179.2	-0.233861	-0.300442
179.3	-0.263559	-0.283552
179.4	-0.2916	-0.265664
179.5	-0.317265	-0.247093
179.6	-0.339908	-0.228222
179.7	-0.358891	-0.209445
179.8	-0.37369	-0.191196
179.9	-0.383898	-0.173921
180	-0.389188	-0.158082
180.1	-0.389397	-0.144114
180.2	-0.38451	-0.132365
180.3	-0.374636	-0.123163
180.4	-0.359959	-0.116755
180.5	-0.340775	-0.113331
180.6	-0.317521	-0.112968
180.7	-0.290668	-0.115648
180.8	-0.260808	-0.12121
180.9	-0.228534	-0.129428
181	-0.194502	-0.139982
181.1	-0.159331	-0.152453
181.2	-0.123615	-0.166386
181.3	-0.0879571	-0.181266
181.4	-0.0529321	-0.196618
181.5	-0.0190745	-0.211919
181.6	0.0131447	-0.226727
181.7	0.0433447	-0.24062
181.8	0.0711808	-0.253216
181.9	0.0963658	-0.264249
182	0.118651	-0.273517
182.1	0.13781	-0.280873
182.2	0.153678	-0.286264
182.3	0.166164	-0.289665
182.4	0.175248	-0.291121
182.5	0.180905	-0.290708
182.6	0.183171	-0.288567
182.7	0.18215	-0.284855
182.8	0.177951	-0.279709
182.9	0.170704	-0.273294
183	0.160583	-0.26573
183.1	0.147792	-0.257175
183.2	0.132597	-0.247714
183.3	0.115324	-0.237464
183.4	0.0962625	-0.226535
183.5	0.0757517	-0.214988
183.6	0.0541364	-0.202929
183.7	0.0317884	-0.190406
183.8	0.00907505	-0.177516
183.9	-0.0136635	-0.164339
184	-0.0361313	-0.150952
184.1	-0.0580259	-0.137435
184.2	-0.0790765	-0.123857
184.3	-0.0990395	-0.110312
184.4	-0.117719	-0.0968521
184.5	-0.13496	-0.0835289
184.6	-0.150719	-0.0704099
184.7	-0.164932	-0.0575564
184.8	-0.177589	-0.0449969
184.9	-0.188757	-0.0327872
185	-0.1985	-0.0209718
185.1	-0.206916	-0.00964086
185.2	-0.214133	0.0012261
185.3	-0.220318	0.0115955
185.4	-0.225646	0.0214454
185.5	-0.23028	0.0307493
185.6	-0.234385	0.0394776
185.7	-0.238142	0.0475822
185.8	-0.241693	0.055041
185.9	-0.245193	0.0617981
186	-0.248759	0.0678133
186.1	-0.252508	0.0730645
186.2	-0.256527	0.0775294
186.3	-0.260917	0.0812188
186.4	-0.265771	0.0840616
186.5	-0.27113	0.0860217
186.6	-0.276999	0.0870968
186.7	-0.283326	0.0872702
186.8	-0.290077	0.086557
186.9	-0.297252	0.084958
187	-0.304789	0.0824926
187.1	-0.312616	0.0791932
187.2	-0.320664	0.075096
187.3	-0.328812	0.0702257
187.4	-0.336958	0.0646165
187.5	-0.344991	0.0583731
187.6	-0.352837	0.0515094
187.7	-0.360388	0.0440658
187.8	-0.367515	0.0361017
187.9	-0.374123	0.0276744
188	-0.380079	0.0188766
188.1	-0.385219	0.00980796
188.2	-0.389393	0.000559544
188.3	-0.392474	-0.00882689
188.4	-0.394323	-0.0183328
188.5	-0.394766	-0.0278235
188.6	-0.393667	-0.0371954
188.7	-0.390905	-0.0463799
188.8	-0.38637	-0.0553491
188.9	-0.380007	-0.064053
189	-0.371706	-0.0724502
189.1	-0.361462	-0.0805042
189.2	-0.349349	-0.0881886
189.3	-0.335463	-0.0955179
189.4	-0.319925	-0.102559
189.5	-0.302925	-0.109379
189.6	-0.284712	-0.11603
189.7	-0.265586	-0.122381
189.8	-0.245881	-0.128684
189.9	-0.225937	-0.135055
190	-0.206122	-0.141596
190.1	-0.186756	-0.148361
190.2	-0.168174	-0.155391
190.3	-0.150676	-0.162725
190.4	-0.134554	-0.170336
190.5	-0.120024	-0.17819
190.6	-0.107177	-0.186198
190.7	-0.0960634	-0.194247
190.8	-0.0866761	-0.202244
190.9	-0.0789252	-0.210105
191	-0.0726554	-0.217739
191.1	-0.0676512	-0.224993
191.2	-0.0637088	-0.231771
191.3	-0.0605423	-0.238026
191.4	-0.0578568	-0.243731
191.5	-0.0553675	-0.24892
191.6	-0.052808	-0.253627
191.7	-0.0499857	-0.257936
191.8	-0.0467238	-0.261937
191.9	-0.0428944	-0.26574
192	-0.0384338	-0.269431
192.1	-0.0333409	-0.273154
192.2	-0.027699	-0.277035
192.3	-0.0215867	-0.281167
192.4	-0.0151475	-0.285561
192.5	-0.00855927	-0.290226
192.6	-0.00197767	-0.295126
192.7	0.00436036	-0.300184
192.8	0.0102591	-0.305338
192.9	0.0155362	-0.31038
193	0.0200359	-0.315142
193.1	0.0236316	-0.319359
193.2	0.0262245	-0.322866
193.3	0.0277202	-0.325453
193.4	0.0280696	-0.326915
193.5	0.0272583	-0.327077
193.6	0.0252993	-0.325815
193.7	0.0222384	-0.322998
193.8	0.0181069	-0.318594
193.9	0.0129784	-0.312565
194	0.00694575	-0.304989
194.1	0.000109622	-0.295953
194.2	-0.007373	-0.285605
194.3	-0.0153759	-0.274119
194.4	-0.0237679	-0.261643
194.5	-0.032416	-0.248387
194.6	-0.0411838	-0.234613
194.7	-0.0499462	-0.22058
194.8	-0.0585395	-0.206522
194.9	-0.066806	-0.192702
195	-0.0746163	-0.179345
195.1	-0.0818501	-0.166623
195.2	-0.0884253	-0.154694
195.3	-0.0943126	-0.143685
195.4	-0.0994677	-0.133669
195.5	-0.10385	-0.124712
195.6	-0.107449	-0.116764
195.7	-0.110329	-0.109796
195.8	-0.112541	-0.103674
195.9	-0.114154	-0.0981899
196	-0.115247	-0.0931083
196.1	-0.115915	-0.0881774
196.2	-0.116214	-0.0831063
196.3	-0.11625	-0.077587
196.4	-0.116057	-0.071288
196.5	-0.115712	-0.06396
196.6	-0.115209	-0.0553589
196.7	-0.114573	-0.0452338
196.8	-0.113792	-0.0334383
196.9	-0.112874	-0.0198519
197	-0.111842	-0.00447581
197.1	-0.110669	0.0126073
197.2	-0.109334	0.0312635
197.3	-0.10788	0.0512606
197.4	-0.106352	0.0723749
197.5	-0.104809	0.0942912
197.6	-0.103338	0.116646
197.7	-0.102075	0.139046
197.8	-0.101157	0.1611
197.9	-0.100714	0.182492
198	-0.100922	0.202885
198.1	-0.101966	0.221999
198.2	-0.104009	0.239638
198.3	-0.107249	0.255672
198.4	-0.111794	0.270083
198.5	-0.117788	0.28286
198.6	-0.125326	0.294069
198.7	-0.134466	0.303828
198.8	-0.14518	0.312313
198.9	-0.157418	0.319792
199	-0.171115	0.326464
199.1	-0.186132	0.332559
199.2	-0.20229	0.338248
199.3	-0.219419	0.343727
199.4	-0.237275	0.349156
199.5	-0.255645	0.354628
199.6	-0.274279	0.360151
199.7	-0.292914	0.365669
[truncated: 5,003 more rows]

## Sheet: 17n06052.abf
	current (pA)
Time (ms)	30 uM 5-HT	100 uM cocaine
0	-0.0198722	0.191147
0.0996094	-0.0385454	0.168329
0.200195	-0.0567316	0.143595
0.299805	-0.0744152	0.117558
0.400391	-0.0916448	0.0908288
0.5	-0.108435	0.0641358
0.599609	-0.124807	0.0382034
0.700195	-0.140706	0.0137178
0.799805	-0.156062	-0.00866038
0.900391	-0.170818	-0.0284773
1	-0.184827	-0.0452622
1.09961	-0.197943	-0.0587192
1.2002	-0.210056	-0.0686289
1.2998	-0.221018	-0.0748778
1.40039	-0.230711	-0.0775594
1.5	-0.238988	-0.0768213
1.59961	-0.24577	-0.0729432
1.7002	-0.250995	-0.0662374
1.7998	-0.25468	-0.0570246
1.90039	-0.256921	-0.0457502
2	-0.25789	-0.0327624
2.09961	-0.257801	-0.0185069
2.2002	-0.256925	-0.0033869
2.2998	-0.255547	0.0122642
2.40039	-0.254005	0.028146
2.5	-0.252613	0.0440338
2.59961	-0.251718	0.0597317
2.7002	-0.251628	0.0751327
2.7998	-0.252605	0.090214
2.90039	-0.254862	0.104942
3	-0.258559	0.119357
3.09961	-0.263762	0.133453
3.2002	-0.270486	0.147244
3.2998	-0.278611	0.160794
3.40039	-0.287955	0.174102
3.5	-0.298247	0.187135
3.59961	-0.309146	0.199849
3.7002	-0.320316	0.212116
3.7998	-0.331338	0.22379
3.90039	-0.341793	0.234665
4	-0.35118	0.244524
4.09961	-0.35906	0.253121
4.2002	-0.365065	0.260154
4.2998	-0.368827	0.265411
4.40039	-0.369953	0.268661
4.5	-0.368036	0.269722
4.59961	-0.363151	0.268504
4.7002	-0.355218	0.264911
4.7998	-0.344219	0.258994
4.90039	-0.330272	0.250823
5	-0.313642	0.240628
5.09961	-0.294593	0.22869
5.2002	-0.273535	0.215341
5.2998	-0.250945	0.201054
5.40039	-0.227352	0.186262
5.5	-0.203312	0.171498
5.59961	-0.179385	0.157225
5.7002	-0.156171	0.143904
5.7998	-0.134173	0.131996
5.90039	-0.113872	0.121885
6	-0.0956232	0.113941
6.09961	-0.0796836	0.10834
6.2002	-0.0661869	0.105172
6.2998	-0.0552182	0.104483
6.40039	-0.0466998	0.106134
6.5	-0.0404107	0.109978
6.59961	-0.0360611	0.115747
6.7002	-0.0332751	0.123091
6.7998	-0.0316168	0.131659
6.90039	-0.0305897	0.141026
7	-0.0297297	0.150809
7.09961	-0.0286462	0.160597
7.2002	-0.0269573	0.17001
7.2998	-0.0243358	0.178727
7.40039	-0.0205146	0.186464
7.5	-0.0153761	0.193
7.59961	-0.00888063	0.198235
7.7002	-0.00109904	0.202125
7.7998	0.00777512	0.204654
7.90039	0.0175477	0.205851
8	0.0278647	0.20584
8.09961	0.038369	0.204762
8.2002	0.0487308	0.202763
8.2998	0.0585236	0.200004
8.40039	0.0673659	0.196573
8.5	0.0749196	0.192635
8.59961	0.0808861	0.188264
8.7002	0.0850037	0.183497
8.7998	0.087123	0.178435
8.90039	0.0871452	0.173067
9	0.0850345	0.167397
9.09961	0.0808563	0.161408
9.2002	0.0747598	0.155024
9.2998	0.0669695	0.148248
9.40039	0.057765	0.141
9.5	0.0474815	0.133275
9.59961	0.0365256	0.125064
9.7002	0.0252903	0.11639
9.7998	0.0141765	0.107304
9.90039	0.00358035	0.097829
10	-0.00609905	0.0880827
10.0996	-0.0144906	0.0781637
10.2002	-0.0213468	0.0681629
10.2998	-0.0264089	0.0582443
10.4004	-0.0294963	0.048515
10.5	-0.0305094	0.0391094
10.5996	-0.0293847	0.0301463
10.7002	-0.0261302	0.021724
10.7998	-0.0208111	0.0139293
10.9004	-0.01357	0.00681661
11	-0.00455085	0.000443159
11.0996	0.00604285	-0.00515162
11.2002	0.0180492	-0.00995425
11.2998	0.031219	-0.0140235
11.4004	0.0453468	-0.0174258
11.5	0.0601949	-0.0202324
11.5996	0.0754976	-0.0225625
11.7002	0.0910482	-0.0245304
11.7998	0.106605	-0.0262152
11.9004	0.121951	-0.0277495
12	0.136795	-0.0292471
12.0996	0.150873	-0.0308034
12.2002	0.163948	-0.0324755
12.2998	0.17575	-0.0343078
12.4004	0.186001	-0.0363998
12.5	0.194403	-0.0387163
12.5996	0.200649	-0.0412553
12.7002	0.204455	-0.0439717
12.7998	0.205528	-0.0467927
12.9004	0.203633	-0.0496712
13	0.198583	-0.0525115
13.0996	0.190227	-0.0552367
13.2002	0.178486	-0.0577921
13.2998	0.163342	-0.060061
13.4004	0.144833	-0.0620314
13.5	0.123085	-0.0636588
13.5996	0.0983181	-0.0649064
13.7002	0.0708779	-0.0657422
13.7998	0.041157	-0.0660795
13.9004	0.0096344	-0.0659063
14	-0.0232174	-0.0651557
14.0996	-0.0568085	-0.063777
14.2002	-0.0905264	-0.0617247
14.2998	-0.123779	-0.0589147
14.4004	-0.155969	-0.0552716
14.5	-0.186555	-0.0507158
14.5996	-0.215016	-0.0451582
14.7002	-0.240915	-0.0385344
14.7998	-0.263864	-0.0307271
14.9004	-0.283586	-0.0216864
15	-0.299906	-0.0113526
15.0996	-0.312716	0.0002662
15.2002	-0.322035	0.0131503
15.2998	-0.327971	0.027253
15.4004	-0.330681	0.0424586
15.5	-0.330395	0.058646
15.5996	-0.327372	0.0755823
15.7002	-0.321888	0.0929897
15.7998	-0.314287	0.110623
15.9004	-0.304886	0.128123
16	-0.293995	0.145164
16.0996	-0.281964	0.161377
16.2002	-0.269062	0.176372
16.2998	-0.255549	0.189798
16.4004	-0.241668	0.20128
16.5	-0.227688	0.21052
16.5996	-0.213812	0.217267
16.7002	-0.200235	0.221341
16.7998	-0.187174	0.222649
16.9004	-0.17478	0.221126
17	-0.163215	0.216849
17.0996	-0.152657	0.209924
17.2002	-0.143265	0.200573
17.2998	-0.135228	0.189156
17.4004	-0.128731	0.17608
17.5	-0.123955	0.161832
17.5996	-0.121072	0.146895
17.7002	-0.120185	0.131792
17.7998	-0.121409	0.117104
17.9004	-0.124822	0.103347
18	-0.130478	0.0910874
18.0996	-0.138418	0.0807984
18.2002	-0.148566	0.0729061
18.2998	-0.160861	0.0677694
18.4004	-0.175181	0.0656013
18.5	-0.191334	0.0666385
18.5996	-0.209123	0.0709401
18.7002	-0.228266	0.0784421
18.7998	-0.248461	0.0890379
18.9004	-0.269352	0.102456
19	-0.290571	0.118424
19.0996	-0.311755	0.136518
19.2002	-0.332541	0.15625
19.2998	-0.352573	0.177104
19.4004	-0.371541	0.198464
19.5	-0.389123	0.219766
19.5996	-0.405053	0.240389
19.7002	-0.419116	0.259768
19.7998	-0.431229	0.277359
19.9004	-0.441317	0.292629
20	-0.449323	0.305223
20.0996	-0.455259	0.314782
20.2002	-0.459233	0.321102
20.2998	-0.461369	0.324096
20.4004	-0.461797	0.323812
20.5	-0.460714	0.320416
20.5996	-0.458305	0.314167
20.7002	-0.454756	0.305444
20.7998	-0.450247	0.294743
20.9004	-0.44491	0.282562
21	-0.438952	0.269507
21.0996	-0.432514	0.256178
21.2002	-0.425705	0.243144
21.2998	-0.418608	0.230958
21.4004	-0.411274	0.220065
21.5	-0.403748	0.210895
21.5996	-0.39603	0.203682
21.7002	-0.388106	0.198535
21.7998	-0.379949	0.195491
21.9004	-0.371479	0.194418
22	-0.362616	0.195137
22.0996	-0.353262	0.197362
22.2002	-0.343285	0.200732
22.2998	-0.332516	0.204881
22.4004	-0.320815	0.209348
22.5	-0.308096	0.213759
22.5996	-0.294274	0.217671
22.7002	-0.279279	0.220701
22.7998	-0.263057	0.222585
22.9004	-0.24562	0.223042
23	-0.227021	0.22195
23.0996	-0.207385	0.219211
23.2002	-0.186909	0.21473
23.2998	-0.165815	0.208557
23.4004	-0.144406	0.200716
23.5	-0.122988	0.191327
23.5996	-0.101897	0.180508
23.7002	-0.0814665	0.168412
23.7998	-0.0620091	0.155232
23.9004	-0.0438269	0.141116
24	-0.0271344	0.126297
24.0996	-0.0120707	0.110959
24.2002	0.00122537	0.0953179
24.2998	0.0127794	0.0796075
24.4004	0.0226555	0.0640394
24.5	0.0310473	0.0488604
24.5996	0.0381674	0.0342565
24.7002	0.0443248	0.0204184
24.7998	0.0498614	0.00750929
24.9004	0.0551084	-0.00433598
25	0.0604182	-0.0150184
25.0996	0.0661332	-0.0244826
25.2002	0.072581	-0.0327556
25.2998	0.0800022	-0.0399126
25.4004	0.0886115	-0.046075
25.5	0.0985229	-0.0513643
25.5996	0.109731	-0.0559228
25.7002	0.122111	-0.0599476
25.7998	0.135499	-0.0635756
25.9004	0.149641	-0.0669791
26	0.164198	-0.070294
26.0996	0.178794	-0.073586
26.2002	0.192955	-0.0769168
26.2998	0.20621	-0.0802091
26.4004	0.218064	-0.0834556
26.5	0.228009	-0.0865575
26.5996	0.235587	-0.0893852
26.7002	0.240318	-0.091802
26.7998	0.241855	-0.0935953
26.9004	0.239926	-0.0947006
27	0.234307	-0.0950131
27.0996	0.224876	-0.0944649
27.2002	0.211637	-0.0930824
27.2998	0.194739	-0.0908511
27.4004	0.174405	-0.0879237
27.5	0.150967	-0.0844257
27.5996	0.124856	-0.0806094
27.7002	0.0965624	-0.0767756
27.7998	0.0667387	-0.0731863
27.9004	0.0360053	-0.0701736
28	0.00505712	-0.0680405
28.0996	-0.0254335	-0.0670777
28.2002	-0.0547719	-0.067586
28.2998	-0.0822837	-0.0697632
28.4004	-0.107334	-0.0738223
28.5	-0.129344	-0.0798614
28.5996	-0.147847	-0.087991
28.7002	-0.162474	-0.0982435
28.7998	-0.172963	-0.110514
28.9004	-0.179159	-0.124665
29	-0.180997	-0.140527
29.0996	-0.178559	-0.15788
29.2002	-0.172051	-0.176462
29.2998	-0.161815	-0.195931
29.4004	-0.148247	-0.215978
29.5	-0.13185	-0.236283
29.5996	-0.113209	-0.256528
29.7002	-0.0928994	-0.276426
29.7998	-0.0715437	-0.295638
29.9004	-0.0497436	-0.313927
30	-0.0281038	-0.331016
30.0996	-0.00712799	-0.346729
30.2002	0.0126837	-0.360943
30.2998	0.0309175	-0.373508
30.4004	0.0473014	-0.384342
30.5	0.0616235	-0.393358
30.5996	0.0737948	-0.400508
30.7002	0.0838103	-0.405795
30.7998	0.0917497	-0.409264
30.9004	0.0977585	-0.410971
31	0.102003	-0.410932
31.0996	0.104715	-0.409246
31.2002	0.106102	-0.406004
31.2998	0.106386	-0.401308
31.4004	0.10581	-0.395329
31.5	0.104542	-0.388209
31.5996	0.102741	-0.380142
31.7002	0.10046	-0.371337
31.7998	0.0977643	-0.361986
31.9004	0.0946801	-0.352376
32	0.091208	-0.342755
32.0996	0.0873578	-0.333405
32.2002	0.0831263	-0.324547
32.2998	0.0784562	-0.316325
32.4004	0.0733477	-0.308932
32.5	0.0678257	-0.302475
32.5996	0.0619634	-0.296997
32.7002	0.0558392	-0.292523
32.7998	0.0495793	-0.28894
32.9004	0.0433176	-0.286121
33	0.0372223	-0.283813
33.0996	0.0314535	-0.281775
33.2002	0.0262158	-0.27973
33.2998	0.0217135	-0.277363
33.4004	0.0180871	-0.274433
33.5	0.0154577	-0.270631
33.5996	0.0139599	-0.265743
33.7002	0.0136797	-0.25959
33.7998	0.0146492	-0.252073
33.9004	0.0168697	-0.243175
34	0.0202849	-0.232955
34.0996	0.0248222	-0.221549
34.2002	0.0303892	-0.209143
34.2998	0.0368303	-0.195956
34.4004	0.0440151	-0.182286
34.5	0.051759	-0.168405
34.5996	0.0598391	-0.154628
34.7002	0.0680851	-0.141238
34.7998	0.076292	-0.128461
34.9004	0.0842928	-0.116476
35	0.0919097	-0.105392
35.0996	0.0990015	-0.0953037
35.2002	0.105374	-0.0862235
35.2998	0.110851	-0.0780813
35.4004	0.115282	-0.0708197
35.5	0.118543	-0.0642702
35.5996	0.120546	-0.0582204
35.7002	0.121208	-0.0524919
35.7998	0.120439	-0.0468843
35.9004	0.118235	-0.0412411
36	0.114589	-0.0353605
36.0996	0.109529	-0.0291285
36.2002	0.10314	-0.0224532
36.2998	0.0954803	-0.0152286
36.4004	0.0866454	-0.00745159
36.5	0.0767565	0.000913396
36.5996	0.0659708	0.00979795
36.7002	0.0544642	0.0191147
36.7998	0.0424141	0.0287321
36.9004	0.0299481	0.0384877
37	0.0172357	0.0482406
37.0996	0.00439697	0.0577507
37.2002	-0.00847052	0.0667928
37.2998	-0.0212564	0.075167
37.4004	-0.0338803	0.0826178
37.5	-0.046273	0.0889427
37.5996	-0.0584092	0.09392
37.7002	-0.0702229	0.0973724
37.7998	-0.081621	0.0991358
37.9004	-0.0925222	0.0991141
38	-0.102779	0.097215
38.0996	-0.112314	0.0933992
38.2002	-0.120903	0.0876848
38.2998	-0.128315	0.08017
38.4004	-0.134316	0.0709746
38.5	-0.138627	0.0603499
38.5996	-0.14105	0.0485498
38.7002	-0.141369	0.0359319
38.7998	-0.139466	0.0229386
38.9004	-0.135151	0.00995277
39	-0.128386	-0.00255466
39.0996	-0.119201	-0.0141104
39.2002	-0.107688	-0.0242547
39.2998	-0.0941045	-0.0324983
39.4004	-0.0788049	-0.0383927
39.5	-0.0622157	-0.0414855
39.5996	-0.0448036	-0.0414511
39.7002	-0.0270261	-0.0380295
39.7998	-0.00946843	-0.03104
39.9004	0.00732479	-0.0203769
40	0.0227898	-0.006015
40.0996	0.0363898	0.0119407
40.2002	0.0476854	0.0332334
40.2998	0.0563193	0.0575334
40.4004	0.0620017	0.0843506
40.5	0.0645299	0.113194
40.5996	0.0637776	0.143413
40.7002	0.0597669	0.174367
40.7998	0.0525823	0.205386
40.9004	0.0424354	0.235719
41	0.0296192	0.264699
41.0996	0.0145116	0.291661
41.2002	-0.00247244	0.316031
41.2998	-0.0208711	0.337309
41.4004	-0.0401648	0.355076
41.5	-0.0598131	0.369087
41.5996	-0.0792988	0.379172
41.7002	-0.0980641	0.385319
41.7998	-0.115608	0.387668
41.9004	-0.131476	0.386389
42	-0.145221	0.381831
42.0996	-0.156464	0.374353
42.2002	-0.16489	0.364389
42.2998	-0.170245	0.352438
42.4004	-0.172349	0.339027
42.5	-0.171097	0.324701
42.5996	-0.166492	0.309935
42.7002	-0.158561	0.295156
42.7998	-0.147473	0.280783
42.9004	-0.133433	0.267108
43	-0.116722	0.254444
43.0996	-0.0976955	0.242978
43.2002	-0.0767304	0.232868
43.2998	-0.0542825	0.22418
43.4004	-0.0308046	0.216905
43.5	-0.00676909	0.210984
43.5996	0.0173483	0.206255
43.7002	0.0411229	0.202576
43.7998	0.0641119	0.199815
43.9004	0.0859109	0.197713
44	0.106143	0.196051
44.0996	0.124551	0.194591
44.2002	0.140897	0.193119
44.2998	0.155004	0.191496
44.4004	0.166784	0.189519
44.5	0.17621	0.187096
44.5996	0.183294	0.184134
44.7002	0.188143	0.180594
44.7998	0.190875	0.176561
44.9004	0.191713	0.172094
45	0.190849	0.167438
45.0996	0.188558	0.162826
45.2002	0.185108	0.158509
45.2998	0.180793	0.154856
45.4004	0.17587	0.152197
45.5	0.170645	0.1509
45.5996	0.165423	0.151213
45.7002	0.160472	0.153411
45.7998	0.156038	0.157739
45.9004	0.152317	0.164317
46	0.149506	0.173295
46.0996	0.147802	0.184666
46.2002	0.147314	0.198342
46.2998	0.148102	0.214163
46.4004	0.150178	0.231831
46.5	0.15352	0.25102
46.5996	0.158125	0.271344
46.7002	0.163894	0.292381
46.7998	0.170705	0.313724
46.9004	0.17836	0.334933
47	0.186679	0.355614
47.0996	0.195487	0.375316
47.2002	0.204568	0.393688
47.2998	0.213691	0.410448
47.4004	0.222658	0.425341
47.5	0.231289	0.438207
47.5996	0.239434	0.448961
47.7002	0.246918	0.457511
47.7998	0.253628	0.463888
47.9004	0.259485	0.468102
48	0.264479	0.470253
48.0996	0.268599	0.470406
48.2002	0.27184	0.468655
48.2998	0.274255	0.465152
48.4004	0.275961	0.460047
48.5	0.277034	0.45349
48.5996	0.277612	0.44566
48.7002	0.277758	0.43663
48.7998	0.277629	0.426621
48.9004	0.277338	0.415761
49	0.27704	0.404254
49.0996	0.276877	0.392287
49.2002	0.276965	0.380061
49.2998	0.277462	0.367894
49.4004	0.278509	0.355992
49.5	0.280245	0.344631
49.5996	0.282793	0.334047
49.7002	0.286199	0.32444
49.7998	0.290557	0.316058
49.9004	0.295952	0.309057
50	0.302461	0.303624
50.0996	0.310132	0.299825
50.2002	0.318921	0.297686
50.2998	0.328751	0.297202
50.4004	0.339473	0.298245
50.5	0.350907	0.300653
50.5996	0.362819	0.304152
50.7002	0.374887	0.308473
50.7998	0.386791	0.313327
50.9004	0.398095	0.31836
51	0.408304	0.323236
51.0996	0.416925	0.327576
51.2002	0.423447	0.330977
51.2998	0.42734	0.333173
51.4004	0.428106	0.333868
51.5	0.425254	0.332858
51.5996	0.418406	0.329972
51.7002	0.40722	0.325115
51.7998	0.391508	0.318234
51.9004	0.371171	0.309329
52	0.346224	0.298485
52.0996	0.316818	0.285825
52.2002	0.283273	0.271489
52.2998	0.24606	0.255718
52.4004	0.205755	0.238749
52.5	0.163067	0.220844
52.5996	0.118786	0.202289
52.7002	0.0737618	0.18333
52.7998	0.0289184	0.164296
52.9004	-0.0148103	0.145449
53	-0.0564757	0.127045
53.0996	-0.0951544	0.109338
53.2002	-0.130009	0.0925588
53.2998	-0.160306	0.0769526
53.4004	-0.185425	0.0626988
53.5	-0.20493	0.0500651
53.5996	-0.218464	0.0392807
53.7002	-0.22587	0.030449
53.7998	-0.227116	0.0237756
53.9004	-0.222307	0.0193705
54	-0.21175	0.0173402
54.0996	-0.195887	0.0177744
54.2002	-0.175256	0.0206852
54.2998	-0.150486	0.0261412
54.4004	-0.122256	0.0341121
54.5	-0.0913039	0.044587
54.5996	-0.0583817	0.0574101
54.7002	-0.02423	0.0723992
54.7998	0.0104473	0.0894104
54.9004	0.0449864	0.108205
55	0.0788076	0.128568
55.0996	0.111359	0.150251
55.2002	0.142217	0.172988
55.2998	0.171016	0.196522
55.4004	0.197476	0.220508
55.5	0.221369	0.244673
55.5996	0.242533	0.268717
55.7002	0.260925	0.292447
55.7998	0.276491	0.315625
55.9004	0.289237	0.338019
56	0.299139	0.359419
56.0996	0.306256	0.379622
56.2002	0.310677	0.398435
56.2998	0.312484	0.415677
56.4004	0.311796	0.431112
56.5	0.308734	0.444562
56.5996	0.303434	0.455819
56.7002	0.296098	0.464707
56.7998	0.286864	0.471055
56.9004	0.276003	0.474712
57	0.263733	0.475592
57.0996	0.250396	0.473601
57.2002	0.236356	0.468659
57.2998	0.221979	0.460818
57.4004	0.207651	0.450178
57.5	0.193791	0.436951
57.5996	0.1808	0.421385
57.7002	0.169074	0.403797
57.7998	0.158953	0.384615
57.9004	0.150762	0.364195
58	0.144694	0.342957
58.0996	0.14093	0.321323
58.2002	0.139553	0.299687
58.2998	0.140559	0.278416
58.4004	0.143786	0.257755
58.5	0.148981	0.237994
58.5996	0.155815	0.219233
58.7002	0.16383	0.201502
58.7998	0.172502	0.184766
58.9004	0.181265	0.168872
59	0.189531	0.153676
59.0996	0.196667	0.138986
59.2002	0.202022	0.124596
59.2998	0.204986	0.110304
59.4004	0.205007	0.0959613
59.5	0.201616	0.081485
59.5996	0.194409	0.0668486
59.7002	0.183174	0.0520843
59.7998	0.167777	0.0373677
59.9004	0.148272	0.0229192
60	0.124828	0.00908542
60.0996	0.0977322	-0.00381272
60.2002	0.0674021	-0.0153454
60.2998	0.0343694	-0.0250965
60.4004	-0.000721645	-0.0326508
60.5	-0.0371792	-0.0375933
60.5996	-0.0742353	-0.0395943
60.7002	-0.111107	-0.038366
60.7998	-0.147016	-0.0337018
60.9004	-0.181195	-0.0254988
61	-0.212976	-0.0137065
61.0996	-0.241781	0.00157061
61.2002	-0.267079	0.0201678
61.2998	-0.288461	0.0417927
61.4004	-0.305624	0.0661187
61.5	-0.318414	0.0926877
61.5996	-0.326849	0.120978
61.7002	-0.331013	0.150447
61.7998	-0.331113	0.180521
61.9004	-0.327456	0.210537
62	-0.3204	0.239929
62.0996	-0.310398	0.268067
62.2002	-0.29791	0.294404
62.2998	-0.283438	0.318476
62.4004	-0.267467	0.339827
62.5	-0.250465	0.358164
62.5996	-0.23288	0.373282
62.7002	-0.215089	0.385083
62.7998	-0.197464	0.393624
62.9004	-0.180313	0.398982
63	-0.163848	0.401424
63.0996	-0.148182	0.401214
63.2002	-0.133446	0.398652
63.2998	-0.119669	0.394149
63.4004	-0.106852	0.388125
63.5	-0.0949126	0.381045
63.5996	-0.0837874	0.37328
63.7002	-0.0733929	0.365126
63.7998	-0.0636122	0.356916
63.9004	-0.0543611	0.348847
64	-0.0454833	0.341145
64.0996	-0.036904	0.333916
64.2002	-0.028507	0.327196
64.2998	-0.0202554	0.32102
64.4004	-0.0121271	0.315359
64.5	-0.0040757	0.310194
64.5996	0.00391336	0.305447
64.7002	0.0118419	0.301092
64.7998	0.0196461	0.297086
64.9004	0.0272605	0.293364
65	0.0346125	0.289876
65.0996	0.0416072	0.286541
65.2002	0.0481753	0.283313
65.2998	0.0542135	0.280086
65.4004	0.0596102	0.276714
65.5	0.0642594	0.273122
65.5996	0.0681107	0.269165
65.7002	0.0711069	0.26464
65.7998	0.0731747	0.25938
65.9004	0.0742537	0.253207
66	0.0743462	0.246006
66.0996	0.0734772	0.237602
66.2002	0.0716937	0.227847
66.2998	0.0690579	0.21674
66.4004	0.0657096	0.204256
66.5	0.0617716	0.190447
66.5996	0.0573934	0.175453
66.7002	0.0527635	0.159425
66.7998	0.0480977	0.142665
66.9004	0.0436143	0.125463
67	0.0395277	0.108225
67.0996	0.0360331	0.0913162
67.2002	0.0333595	0.0751479
67.2998	0.0317348	0.0602002
67.4004	0.0313097	0.0468326
67.5	0.032266	0.035507
67.5996	0.0347434	0.0265378
67.7002	0.0388059	0.02017
67.7998	0.0444733	0.0166643
67.9004	0.0517437	0.0161253
68	0.060585	0.0186044
68.0996	0.0709249	0.0240617
68.2002	0.0825773	0.0322897
68.2998	0.0953032	0.0430889
68.4004	0.108782	0.0560529
68.5	0.122702	0.0708177
68.5996	0.136696	0.0868539
68.7002	0.150336	0.103579
68.7998	0.163186	0.120381
68.9004	0.17481	0.136599
69	0.184808	0.151642
69.0996	0.192811	0.164899
69.2002	0.198488	0.175792
69.2998	0.201561	0.183888
69.4004	0.20184	0.188699
69.5	0.199273	0.18999
69.5996	0.19393	0.187517
69.7002	0.185932	0.181204
69.7998	0.175558	0.171119
69.9004	0.163154	0.157413
70	0.149165	0.140337
70.0996	0.134108	0.120253
70.2002	0.118523	0.0975481
70.2998	0.103018	0.072714
70.4004	0.0882118	0.0462798
70.5	0.0746548	0.0187987
70.5996	0.0628856	-0.00921436
70.7002	0.0533729	-0.0372978
70.7998	0.0465272	-0.0649398
70.9004	0.0426631	-0.0916953
71	0.0419977	-0.117165
71.0996	0.0446139	-0.141035
71.2002	0.0505543	-0.163057
71.2998	0.0597641	-0.183018
71.4004	0.0720601	-0.200878
71.5	0.0871984	-0.216531
71.5996	0.104888	-0.229965
71.7002	0.124767	-0.241262
71.7998	0.146464	-0.250471
71.9004	0.169559	-0.257747
72	0.193559	-0.2632
72.0996	0.218031	-0.266995
72.2002	0.242489	-0.269351
72.2998	0.266528	-0.270448
72.4004	0.289744	-0.270526
72.5	0.311744	-0.269733
72.5996	0.332193	-0.268247
72.7002	0.350775	-0.266278
72.7998	0.367218	-0.263906
72.9004	0.381321	-0.261266
73	0.392869	-0.258371
73.0996	0.401703	-0.255238
73.2002	0.407697	-0.251883
73.2998	0.410765	-0.248186
73.4004	0.410865	-0.24407
73.5	0.407997	-0.239379
73.5996	0.402146	-0.233972
73.7002	0.393365	-0.227655
73.7998	0.381734	-0.220203
73.9004	0.36735	-0.211409
74	0.350363	-0.201067
74.0996	0.330946	-0.188997
74.2002	0.309328	-0.175088
74.2998	0.285828	-0.159275
74.4004	0.260772	-0.141529
74.5	0.2345	-0.121845
74.5996	0.207408	-0.100355
74.7002	0.179923	-0.0772312
74.7998	0.152455	-0.0526905
74.9004	0.125461	-0.027039
75	0.0993678	-0.000665562
75.0996	0.0746413	0.0259898
75.2002	0.0516294	0.0524842
75.2998	0.030631	0.0783582
75.4004	0.01187	0.103137
75.5	-0.00452978	0.126374
75.5996	-0.0185001	0.147683
75.7002	-0.0300548	0.166697
75.7998	-0.0393058	0.183135
75.9004	-0.0464412	0.196731
76	-0.0516899	0.207368
76.0996	-0.0553428	0.214979
76.2002	-0.0576981	0.219581
76.2998	-0.0590842	0.221332
76.4004	-0.0598034	0.22042
76.5	-0.0601853	0.217057
76.5996	-0.0605019	0.211513
76.7002	-0.0609406	0.204074
76.7998	-0.0616412	0.195149
76.9004	-0.062697	0.185045
77	-0.064167	0.17408
77.0996	-0.0660216	0.162525
77.2002	-0.0682011	0.150652
77.2998	-0.0706291	0.138755
77.4004	-0.0731841	0.127065
77.5	-0.0757802	0.11578
77.5996	-0.078337	0.105103
77.7002	-0.0807694	0.0951435
77.7998	-0.0830212	0.0861014
77.9004	-0.085021	0.0780678
78	-0.0867183	0.071225
78.0996	-0.0880535	0.0656916
78.2002	-0.0889871	0.0615871
78.2998	-0.0895042	0.0590496
78.4004	-0.0895849	0.0581581
78.5	-0.0891729	0.0590214
78.5996	-0.088175	0.0616512
78.7002	-0.0865192	0.0660625
78.7998	-0.0840637	0.0722087
78.9004	-0.0806932	0.0799591
79	-0.0762781	0.0891689
79.0996	-0.0706274	0.0996281
79.2002	-0.063593	0.111067
79.2998	-0.0550225	0.123162
79.4004	-0.0447609	0.135568
79.5	-0.0327293	0.147885
79.5996	-0.0188331	0.159687
79.7002	-0.0030148	0.170609
79.7998	0.0147509	0.180299
79.9004	0.034454	0.188446
80	0.05605	0.194806
80.0996	0.0794211	0.199206
80.2002	0.104407	0.201562
80.2998	0.130793	0.201861
80.4004	0.158335	0.200204
80.5	0.186759	0.196775
80.5996	0.215732	0.191793
80.7002	0.244914	0.185581
80.7998	0.273924	0.178549
80.9004	0.302345	0.171079
81	0.329814	0.163621
81.0996	0.355947	0.15657
81.2002	0.380402	0.150276
81.2998	0.402809	0.145064
81.4004	0.422869	0.141181
81.5	0.440326	0.138847
81.5996	0.455017	0.138191
81.7002	0.466816	0.139273
81.7998	0.475682	0.142103
81.9004	0.481651	0.146527
82	0.484765	0.152439
82.0996	0.48516	0.159642
82.2002	0.482995	0.167924
82.2998	0.478443	0.1771
82.4004	0.471752	0.186919
82.5	0.463153	0.197175
82.5996	0.452916	0.207647
82.7002	0.441266	0.218146
82.7998	0.428377	0.22855
82.9004	0.41446	0.238709
83	0.399634	0.248613
83.0996	0.384008	0.258168
83.2002	0.367721	0.267292
83.2998	0.350905	0.275944
83.4004	0.333671	0.284092
83.5	0.316121	0.291768
83.5996	0.29837	0.298896
83.7002	0.280544	0.305446
83.7998	0.262794	0.311341
83.9004	0.245247	0.316513
84	0.228047	0.320894
84.0996	0.211377	0.32434
84.2002	0.195459	0.326746
84.2998	0.18048	0.327969
84.4004	0.166642	0.327863
84.5	0.154119	0.326383
84.5996	0.143069	0.323438
84.7002	0.133594	0.318941
84.7998	0.125757	0.31285
84.9004	0.119647	0.305202
85	0.115292	0.296134
85.0996	0.112654	0.285772
85.2002	0.111712	0.274254
85.2998	0.112361	0.261867
85.4004	0.114479	0.248863
85.5	0.117917	0.235556
85.5996	0.122515	0.222198
85.7002	0.128105	0.209102
85.7998	0.134475	0.196533
85.9004	0.141427	0.184719
86	0.148782	0.173812
86.0996	0.156375	0.163864
86.2002	0.164088	0.154848
86.2998	0.171815	0.146729
86.4004	0.17943	0.139339
86.5	0.18685	0.132511
86.5996	0.194013	0.125989
86.7002	0.200878	0.119447
86.7998	0.2074	0.112587
86.9004	0.213582	0.105076
87	0.219407	0.0966998
87.0996	0.224835	0.0872295
87.2002	0.229829	0.0764883
87.2998	0.234353	0.064442
87.4004	0.238352	0.050998
87.5	0.241781	0.0362885
87.5996	0.244524	0.0204052
87.7002	0.246506	0.0035037
87.7998	0.247617	-0.0142302
87.9004	0.247744	-0.0326141
88	0.246778	-0.0513573
88.0996	0.244633	-0.070279
88.2002	0.241261	-0.0891581
88.2998	0.236592	-0.107784
88.4004	0.230564	-0.126056
88.5	0.223166	-0.143816
88.5996	0.21444	-0.160925
88.7002	0.204459	-0.177278
88.7998	0.19337	-0.19273
88.9004	0.181331	-0.207165
89	0.168504	-0.220408
89.0996	0.155108	-0.232284
89.2002	0.141378	-0.242589
89.2998	0.127615	-0.25104
89.4004	0.114071	-0.257458
89.5	0.101003	-0.261561
89.5996	0.0886603	-0.263138
89.7002	0.0773055	-0.262029
89.7998	0.0671048	-0.258081
89.9004	0.0581884	-0.251238
90	0.0506815	-0.241519
90.0996	0.0446542	-0.229038
90.2002	0.0401266	-0.214012
90.2998	0.0370399	-0.196736
90.4004	0.0353091	-0.177684
90.5	0.0348125	-0.157265
90.5996	0.0353662	-0.136039
90.7002	0.03676	-0.114621
90.7998	0.03881	-0.0936044
90.9004	0.0412717	-0.073619
91	0.0439802	-0.0552201
91.0996	0.0467491	-0.0389218
91.2002	0.0493445	-0.0252159
91.2998	0.0515567	-0.0144177
91.4004	0.0532197	-0.00684365
91.5	0.054227	-0.00260617
91.5996	0.0544478	-0.00175941
91.7002	0.0538077	-0.00425367
91.7998	0.0522631	-0.00987337
91.9004	0.0498096	-0.0184211
92	0.0464472	-0.0294984
92.0996	0.0421555	-0.0427156
92.2002	0.0369543	-0.0576389
92.2998	0.0309304	-0.073761
92.4004	0.0241458	-0.0906446
92.5	0.016731	-0.107801
92.5996	0.00880316	-0.124871
92.7002	0.000496051	-0.141486
92.7998	-0.00803899	-0.157386
92.9004	-0.0166746	-0.172437
93	-0.0252204	-0.18648
93.0996	-0.0335294	-0.19948
93.2002	-0.0414908	-0.211507
93.2998	-0.0489714	-0.222703
93.4004	-0.0558615	-0.233335
93.5	-0.0620394	-0.243635
93.5996	-0.0674462	-0.253941
93.7002	-0.0720402	-0.26466
93.7998	-0.0758195	-0.276102
93.9004	-0.0788232	-0.28864
94	-0.0811286	-0.302534
94.0996	-0.0828257	-0.318025
94.2002	-0.0840424	-0.335301
94.2998	-0.0849367	-0.354453
94.4004	-0.0856289	-0.375521
94.5	-0.0863107	-0.398412
94.5996	-0.0871724	-0.422919
94.7002	-0.0883657	-0.448757
94.7998	-0.0900576	-0.475465
94.9004	-0.092425	-0.502598
95	-0.0956161	-0.529627
95.0996	-0.0997289	-0.555986
95.2002	-0.104824	-0.581044
95.2998	-0.110982	-0.604116
95.4004	-0.118217	-0.62459
95.5	-0.12654	-0.641858
95.5996	-0.135886	-0.655341
95.7002	-0.146195	-0.664576
95.7998	-0.157336	-0.669114
95.9004	-0.169149	-0.668698
96	-0.181463	-0.66308
96.0996	-0.19408	-0.652149
96.2002	-0.206781	-0.635958
96.2998	-0.219313	-0.614578
96.4004	-0.231414	-0.588317
96.5	-0.242826	-0.5575
96.5996	-0.253298	-0.522596
96.7002	-0.262561	-0.484165
96.7998	-0.270429	-0.442787
96.9004	-0.276722	-0.399148
97	-0.281251	-0.353951
97.0996	-0.283932	-0.307982
97.2002	-0.284709	-0.262001
97.2998	-0.283592	-0.216762
97.4004	-0.280654	-0.172982
97.5	-0.275991	-0.131373
97.5996	-0.269774	-0.0925919
97.7002	-0.262234	-0.0572634
97.7998	-0.253637	-0.0258042
97.9004	-0.24427	0.00137652
98	-0.234407	0.0240371
98.0996	-0.224315	0.042005
98.2002	-0.214229	0.0551952
98.2998	-0.204358	0.0637085
98.4004	-0.194844	0.0677498
98.5	-0.18579	0.0676122
98.5996	-0.177211	0.0637024
98.7002	-0.169066	0.0564813
98.7998	-0.161249	0.0465303
98.9004	-0.153571	0.0344522
99	-0.145855	0.020887
99.0996	-0.137844	0.00649117
99.2002	-0.129252	-0.00816106
99.2998	-0.119823	-0.0224207
99.4004	-0.109321	-0.0357791
99.5	-0.09758	-0.0477554
99.5996	-0.0844519	-0.0579499
99.7002	-0.0699376	-0.066062
99.7998	-0.0540843	-0.0717804
99.9004	-0.0370319	-0.074939
100	-0.0189892	-0.0754422
100.1	-0.000217797	-0.0732979
100.2	0.0189047	-0.0685715
100.3	0.0379654	-0.0613218
100.4	0.05651	-0.0517418
100.5	0.0740791	-0.0399845
100.6	0.0902306	-0.0262599
100.7	0.10455	-0.0108263
100.8	0.116705	0.00608883
100.9	0.126421	0.0241765
101	0.133546	0.0431282
101.1	0.138009	0.0626541
101.2	0.139859	0.0825046
101.3	0.139217	0.102413
101.4	0.136334	0.122108
101.5	0.131506	0.141348
101.6	0.125117	0.159891
101.7	0.117599	0.1775
101.8	0.109386	0.193975
101.9	0.100927	0.20914
102	0.0926197	0.222876
102.1	0.0848313	0.235064
102.2	0.0779144	0.245657
102.3	0.0721007	0.254627
102.4	0.0675557	0.261937
102.5	0.0643524	0.267592
102.6	0.0624909	0.271559
102.7	0.0618748	0.273851
102.8	0.0623582	0.274464
102.9	0.0638054	0.273383
103	0.066068	0.270618
103.1	0.0689555	0.266134
103.2	0.0722461	0.259876
103.3	0.0757656	0.251793
103.4	0.0793591	0.241783
103.5	0.0828965	0.229764
103.6	0.0863224	0.215646
103.7	0.0896215	0.199347
103.8	0.0927759	0.180854
103.9	0.095857	0.160158
104	0.0989185	0.137331
104.1	0.102074	0.112504
104.2	0.105405	0.0858698
104.3	0.109014	0.0577419
104.4	0.113029	0.0284824
104.5	0.11754	-0.00146866
104.6	0.122643	-0.031639
104.7	0.128409	-0.0615388
104.8	0.134889	-0.0906021
104.9	0.142129	-0.118309
105	0.15009	-0.144103
105.1	0.158772	-0.167542
105.2	0.168168	-0.188286
105.3	0.178253	-0.206029
105.4	0.188987	-0.220609
105.5	0.200311	-0.231894
105.6	0.212185	-0.23992
105.7	0.224611	-0.244786
105.8	0.237579	-0.246765
105.9	0.251094	-0.246222
106	0.265088	-0.243489
106.1	0.279555	-0.239001
106.2	0.294554	-0.233213
106.3	0.310127	-0.226585
106.4	0.326303	-0.2196
106.5	0.343127	-0.212654
106.6	0.360587	-0.206092
106.7	0.378707	-0.200181
106.8	0.397447	-0.195129
106.9	0.416744	-0.191055
107	0.436481	-0.187973
107.1	0.456511	-0.185853
107.2	0.476655	-0.18456
107.3	0.496729	-0.183922
107.4	0.516504	-0.183719
107.5	0.535726	-0.18367
107.6	0.554112	-0.183511
107.7	0.571417	-0.183016
107.8	0.587355	-0.181953
107.9	0.601704	-0.180151
108	0.614195	-0.177446
108.1	0.624629	-0.173757
108.2	0.632827	-0.169117
108.3	0.638653	-0.163628
108.4	0.642011	-0.157483
108.5	0.642846	-0.15093
108.6	0.641113	-0.144293
108.7	0.636837	-0.137987
108.8	0.630064	-0.132377
108.9	0.62089	-0.127915
109	0.60938	-0.124989
109.1	0.595637	-0.124011
109.2	0.579815	-0.125374
109.3	0.562109	-0.129298
109.4	0.542693	-0.135983
109.5	0.521771	-0.145482
109.6	0.49956	-0.157816
109.7	0.476272	-0.172872
109.8	0.452107	-0.19041
109.9	0.427233	-0.210123
110	0.401801	-0.231573
110.1	0.375925	-0.25427
110.2	0.349711	-0.277684
110.3	0.323205	-0.301203
110.4	0.296448	-0.32426
110.5	0.269438	-0.346216
110.6	0.242133	-0.366587
110.7	0.214484	-0.384916
110.8	0.186419	-0.400805
110.9	0.157876	-0.413992
111	0.12876	-0.424259
111.1	0.0990282	-0.431563
111.2	0.0687277	-0.435937
111.3	0.0379057	-0.437503
111.4	0.00665358	-0.43649
111.5	-0.0249047	-0.433202
111.6	-0.0565852	-0.428042
111.7	-0.0881527	-0.421412
111.8	-0.119293	-0.413736
111.9	-0.149701	-0.40547
112	-0.179036	-0.39701
112.1	-0.206962	-0.388754
112.2	-0.233097	-0.381087
112.3	-0.257078	-0.374286
112.4	-0.278603	-0.368598
112.5	-0.2974	-0.364104
112.6	-0.313218	-0.3609
112.7	-0.325858	-0.358988
112.8	-0.33515	-0.35827
112.9	-0.341019	-0.358667
113	-0.343442	-0.35996
113.1	-0.342455	-0.361907
113.2	-0.338159	-0.364263
113.3	-0.330741	-0.366743
113.4	-0.320414	-0.36911
113.5	-0.30746	-0.371047
113.6	-0.2922	-0.372301
113.7	-0.275022	-0.372649
113.8	-0.256291	-0.371803
113.9	-0.236424	-0.369611
114	-0.215852	-0.365951
114.1	-0.195051	-0.360765
114.2	-0.174533	-0.354011
114.3	-0.154774	-0.345627
114.4	-0.136224	-0.335698
114.5	-0.119358	-0.324289
114.6	-0.104603	-0.311582
114.7	-0.0923727	-0.297752
114.8	-0.0830582	-0.282921
114.9	-0.0770318	-0.267348
115	-0.074581	-0.251163
115.1	-0.0759475	-0.234557
115.2	-0.081286	-0.217704
115.3	-0.0906781	-0.200744
115.4	-0.104111	-0.183855
115.5	-0.121478	-0.1671
115.6	-0.142529	-0.150566
115.7	-0.166928	-0.134297
115.8	-0.194238	-0.118327
115.9	-0.22395	-0.102713
116	-0.255455	-0.0874204
116.1	-0.288121	-0.0724728
116.2	-0.321247	-0.0579145
116.3	-0.354169	-0.0437384
116.4	-0.386186	-0.0299633
116.5	-0.416653	-0.0165817
116.6	-0.444958	-0.00363814
116.7	-0.470612	0.00884398
116.8	-0.493224	0.0208781
116.9	-0.512494	0.0323648
117	-0.528228	0.0432819
117.1	-0.540321	0.053616
117.2	-0.548813	0.0634067
117.3	-0.553847	0.0727501
117.4	-0.555647	0.0816728
117.5	-0.554496	0.0903154
117.6	-0.550738	0.0987783
117.7	-0.544724	0.107179
117.8	-0.536795	0.115701
117.9	-0.527314	0.124487
118	-0.516646	0.133747
118.1	-0.50511	0.143653
118.2	-0.492989	0.15433
118.3	-0.480479	0.165912
118.4	-0.467816	0.178426
118.5	-0.455141	0.191938
118.6	-0.442575	0.206415
118.7	-0.430151	0.221704
118.8	-0.417888	0.237703
118.9	-0.40577	0.25416
119	-0.393776	0.270836
119.1	-0.381868	0.287349
119.2	-0.370039	0.303327
119.3	-0.358259	0.318413
119.4	-0.346483	0.332186
119.5	-0.334707	0.344293
119.6	-0.322948	0.354386
119.7	-0.311261	0.362123
119.8	-0.299725	0.367287
119.9	-0.288405	0.369675
120	-0.277433	0.369217
120.1	-0.26693	0.365923
120.2	-0.257092	0.359929
120.3	-0.248075	0.351475
120.4	-0.239995	0.340899
120.5	-0.232976	0.328621
120.6	-0.227132	0.315129
120.7	-0.222603	0.300953
120.8	-0.219431	0.286649
120.9	-0.217611	0.272756
121	-0.217121	0.259825
121.1	-0.217913	0.248333
121.2	-0.219899	0.238668
121.3	-0.222918	0.231208
121.4	-0.226794	0.226118
121.5	-0.231297	0.223443
121.6	-0.236145	0.223118
121.7	-0.241069	0.224981
121.8	-0.245775	0.228766
121.9	-0.250005	0.234097
122	-0.253465	0.240579
122.1	-0.255872	0.247748
122.2	-0.256964	0.25509
122.3	-0.256515	0.262181
122.4	-0.254305	0.268629
122.5	-0.250201	0.274139
122.6	-0.244097	0.278486
122.7	-0.23598	0.281551
122.8	-0.22584	0.283367
122.9	-0.213744	0.284007
123	-0.199816	0.283726
123.1	-0.18427	0.282785
123.2	-0.167335	0.281537
123.3	-0.149328	0.280419
123.4	-0.130586	0.27978
123.5	-0.111486	0.280008
123.6	-0.0924002	0.281443
123.7	-0.0737477	0.284348
123.8	-0.0559539	0.288933
123.9	-0.0394124	0.295242
124	-0.0244944	0.303238
124.1	-0.0115275	0.312791
124.2	-0.000818674	0.323679
124.3	0.00738556	0.3356
124.4	0.0129595	0.348054
124.5	0.0158041	0.360555
124.6	0.0159505	0.372579
124.7	0.013491	0.383594
124.8	0.00862118	0.393078
124.9	0.00162728	0.400603
125	-0.00714255	0.405764
125.1	-0.0172619	0.408242
125.2	-0.028212	0.407757
125.3	-0.0394251	0.404151
125.4	-0.0502933	0.397393
125.5	-0.0602081	0.387603
125.6	-0.0685864	0.374979
125.7	-0.0748782	0.359773
125.8	-0.0785709	0.342358
125.9	-0.0792333	0.323084
126	-0.0765185	0.302379
126.1	-0.070195	0.280713
126.2	-0.0601839	0.25853
126.3	-0.0465155	0.236268
126.4	-0.0293008	0.214292
126.5	-0.00881665	0.192953
126.6	0.014559	0.172548
126.7	0.0403207	0.153316
126.8	0.0678846	0.13544
126.9	0.096553	0.119022
127	0.125642	0.104141
127.1	0.154432	0.0908532
127.2	0.182259	0.0791396
127.3	0.208426	0.0690047
127.4	0.232291	0.060338
127.5	0.253321	0.053092
127.6	0.271063	0.0471477
127.7	0.285195	0.0424063
127.8	0.295489	0.0387995
127.9	0.301875	0.0361997
128	0.304405	0.0345462
128.1	0.303242	0.0337222
128.2	0.298676	0.0336369
128.3	0.291006	0.0342016
128.4	0.28065	0.0353294
128.5	0.268041	0.0369752
128.6	0.253688	0.0390647
128.7	0.238134	0.0415305
128.8	0.22182	0.0443667
128.9	0.205176	0.0475742
129	0.188575	0.0511908
129.1	0.172372	0.0552163
129.2	0.156836	0.0596773
129.3	0.142158	0.0646092
129.4	0.128484	0.0700918
129.5	0.115853	0.076231
129.6	0.104281	0.0830596
129.7	0.0937755	0.0905608
129.8	0.084296	0.0987489
129.9	0.0758426	0.107559
130	0.0683496	0.116907
130.1	0.0617625	0.126668
130.2	0.0560272	0.136691
130.3	0.0511173	0.146765
130.4	0.0470434	0.156603
130.5	0.0438596	0.16595
130.6	0.0415786	0.17448
130.7	0.0402548	0.181843
130.8	0.0398934	0.187754
130.9	0.0404989	0.19194
131	0.0420805	0.194187
131.1	0.0446498	0.194349
131.2	0.0481682	0.192306
131.3	0.052562	0.188072
131.4	0.0577436	0.181705
131.5	0.0636285	0.173391
131.6	0.0700347	0.163357
131.7	0.0768475	0.151938
131.8	0.0838836	0.139629
131.9	0.0910038	0.12686
132	0.0980655	0.114147
132.1	0.104936	0.101954
132.2	0.111517	0.0907481
132.3	0.117736	0.0809742
132.4	0.123517	0.0730232
132.5	0.128876	0.0672299
132.6	0.133813	0.0637635
132.7	0.138418	0.0627012
132.8	0.142758	0.0641146
132.9	0.146941	0.067848
133	0.151056	0.0737388
133.1	0.155188	0.0814431
133.2	0.159383	0.0906635
133.3	0.163672	0.10108
133.4	0.168093	0.112252
133.5	0.172614	0.123781
133.6	0.177233	0.135279
133.7	0.181867	0.146409
133.8	0.186392	0.156865
133.9	0.19071	0.166362
134	0.194663	0.174769
134.1	0.198086	0.181855
134.2	0.200849	0.187527
134.3	0.202817	0.191817
134.4	0.203857	0.194675
134.5	0.203887	0.196164
134.6	0.202834	0.196276
134.7	0.200672	0.195049
134.8	0.197385	0.192521
134.9	0.19304	0.188684
135	0.187674	0.183592
135.1	0.181336	0.177242
135.2	0.174044	0.169592
135.3	0.165869	0.160665
135.4	0.156854	0.150426
135.5	0.147022	0.138884
135.6	0.13637	0.126019
135.7	0.124894	0.111852
135.8	0.112592	0.0964965
135.9	0.0994017	0.080054
136	0.0852887	0.0627217
136.1	0.0702229	0.0446791
136.2	0.0542382	0.0261241
136.3	0.0374078	0.00735851
136.4	0.0197762	-0.0113686
136.5	0.0014615	-0.029655
136.6	-0.0174529	-0.0471709
136.7	-0.0367812	-0.063544
136.8	-0.0563022	-0.0784008
136.9	-0.0757276	-0.0915174
137	-0.0947764	-0.102616
137.1	-0.113176	-0.111474
137.2	-0.130668	-0.117934
137.3	-0.147018	-0.121861
137.4	-0.161996	-0.123281
137.5	-0.175428	-0.122193
137.6	-0.187231	-0.118715
137.7	-0.197409	-0.112987
137.8	-0.205996	-0.105222
137.9	-0.213106	-0.095762
138	-0.218873	-0.084888
138.1	-0.223494	-0.0729683
138.2	-0.227181	-0.0603799
138.3	-0.230206	-0.0474503
138.4	-0.232828	-0.0345588
138.5	-0.235296	-0.0220149
138.6	-0.2378	-0.0101507
138.7	-0.240507	0.000757983
138.8	-0.243531	0.0105342
138.9	-0.246914	0.0190243
139	-0.250703	0.0261516
139.1	-0.254861	0.0319013
139.2	-0.259304	0.0363557
139.3	-0.263896	0.0396768
139.4	-0.268518	0.042079
139.5	-0.273007	0.0438089
139.6	-0.277215	0.0451601
139.7	-0.281051	0.0463886
139.8	-0.284378	0.0478142
139.9	-0.28715	0.0497406
140	-0.289336	0.0524755
140.1	-0.290911	0.056227
140.2	-0.291917	0.0611203
140.3	-0.292409	0.067276
140.4	-0.292473	0.0746496
140.5	-0.292182	0.0831507
140.6	-0.291636	0.0925689
140.7	-0.29097	0.102586
140.8	-0.290269	0.11286
140.9	-0.289586	0.122956
141	-0.288912	0.132448
141.1	-0.28825	0.140904
141.2	-0.287556	0.147847
141.3	-0.286733	0.152881
141.4	-0.285684	0.155609
141.5	-0.284257	0.155832
141.6	-0.282319	0.153365
141.7	-0.279695	0.148095
141.8	-0.276245	0.140138
141.9	-0.271798	0.129649
142	-0.266224	0.116933
142.1	-0.259429	0.102402
142.2	-0.251357	0.0865372
142.3	-0.241963	0.0699347
142.4	-0.231217	0.0532007
142.5	-0.219198	0.0370021
142.6	-0.205976	0.0219875
142.7	-0.191677	0.00877063
142.8	-0.176382	-0.00206512
142.9	-0.160237	-0.010065
143	-0.143376	-0.0148253
143.1	-0.125923	-0.0160584
143.2	-0.108012	-0.0135599
143.3	-0.0897463	-0.00724315
143.4	-0.0712329	0.00286403
143.5	-0.0526183	0.0165467
143.6	-0.0339913	0.0335386
143.7	-0.0154925	0.053429
143.8	0.00274163	0.0757712
143.9	0.0205808	0.0999902
144	0.037819	0.125498
144.1	0.0542668	0.151687
144.2	0.0696919	0.177901
144.3	0.083873	0.20353
144.4	0.096576	0.227902
144.5	0.107576	0.250416
144.6	0.116623	0.270514
144.7	0.123503	0.287694
144.8	0.128022	0.301597
144.9	0.130015	0.311912
145	0.129414	0.318515
145.1	0.126193	0.321298
145.2	0.120405	0.320239
145.3	0.112127	0.315466
145.4	0.101481	0.307136
145.5	0.0887329	0.295584
145.6	0.0741307	0.281166
145.7	0.0580384	0.264297
145.8	0.0407907	0.245501
145.9	0.0227499	0.225277
146	0.00428831	0.204177
146.1	-0.0142228	0.182703
146.2	-0.0324181	0.16139
146.3	-0.0499295	0.140799
146.4	-0.0664193	0.121439
146.5	-0.0815954	0.103802
146.6	-0.0951757	0.0883141
146.7	-0.106916	0.0753281
146.8	-0.116627	0.0651797
146.9	-0.124206	0.0580906
147	-0.129521	0.0542472
147.1	-0.132478	0.0537195
147.2	-0.13305	0.0564431
147.3	-0.131254	0.0622987
147.4	-0.127159	0.0710026
147.5	-0.120933	0.0822269
147.6	-0.112692	0.0954782
147.7	-0.102604	0.110187
147.8	-0.0908764	0.125709
147.9	-0.0777591	0.141284
148	-0.0635227	0.156151
148.1	-0.0484915	0.169537
148.2	-0.0329515	0.180683
148.3	-0.0171914	0.188947
148.4	-0.00150042	0.19371
148.5	0.0138077	0.194519
148.6	0.0285043	0.190981
148.7	0.0423614	0.182879
148.8	0.0552136	0.170191
148.9	0.0668927	0.153046
149	0.0772626	0.131742
149.1	0.0862684	0.106707
149.2	0.0938826	0.0784426
149.3	0.100106	0.0475535
149.4	0.10497	0.0146477
149.5	0.108516	-0.0195875
149.6	0.110848	-0.0544603
149.7	0.112065	-0.0893274
149.8	0.112314	-0.123572
149.9	0.111695	-0.156716
150	0.110345	-0.188248
150.1	0.108429	-0.217775
150.2	0.106099	-0.24498
150.3	0.103485	-0.269629
150.4	0.100746	-0.291529
150.5	0.0980748	-0.310502
150.6	0.0956322	-0.326475
150.7	0.0935892	-0.339361
150.8	0.0920211	-0.349054
150.9	0.0910774	-0.355519
151	0.0908705	-0.358683
151.1	0.0914968	-0.358577
151.2	0.0930372	-0.355244
151.3	0.0954955	-0.348705
151.4	0.0988799	-0.339088
151.5	0.103181	-0.326453
151.6	0.108316	-0.311022
151.7	0.114177	-0.293071
151.8	0.120608	-0.272915
151.9	0.127481	-0.250921
152	0.134614	-0.227475
152.1	0.141764	-0.203033
152.2	0.14871	-0.178067
152.3	0.155166	-0.153079
152.4	0.160861	-0.128599
152.5	0.165494	-0.105127
152.6	0.168833	-0.0831662
152.7	0.170595	-0.0632013
152.8	0.170518	-0.0456431
152.9	0.168342	-0.0308536
153	0.163792	-0.0191418
153.1	0.156728	-0.010751
153.2	0.146999	-0.00582156
153.3	0.134542	-0.00444385
153.4	0.119367	-0.00664914
153.5	0.101484	-0.0123631
153.6	0.0810187	-0.0214781
153.7	0.0581647	-0.0337759
153.8	0.033196	-0.0489521
153.9	0.00652796	-0.066658
154	-0.0214287	-0.0865062
154.1	-0.0501747	-0.108062
154.2	-0.0792253	-0.130887
154.3	-0.108064	-0.154475
154.4	-0.136175	-0.178374
154.5	-0.163027	-0.202057
154.6	-0.188181	-0.225079
154.7	-0.211242	-0.246988
154.8	-0.231869	-0.267396
154.9	-0.249814	-0.286019
155	-0.264951	-0.302555
155.1	-0.277274	-0.316854
155.2	-0.28683	-0.328805
155.3	-0.293805	-0.338344
155.4	-0.298401	-0.345552
155.5	-0.300901	-0.350486
155.6	-0.301699	-0.353367
155.7	-0.301141	-0.35439
155.8	-0.299646	-0.353802
155.9	-0.297552	-0.351887
156	-0.295205	-0.3489
156.1	-0.292887	-0.34516
156.2	-0.290854	-0.340918
156.3	-0.289309	-0.336383
156.4	-0.288348	-0.331734
156.5	-0.288041	-0.32705
156.6	-0.288389	-0.322401
156.7	-0.289372	-0.317849
156.8	-0.290978	-0.313404
156.9	-0.293123	-0.309052
157	-0.295706	-0.304693
157.1	-0.298663	-0.30028
157.2	-0.30195	-0.295683
157.3	-0.30558	-0.290698
157.4	-0.309555	-0.285223
157.5	-0.313903	-0.279132
157.6	-0.318668	-0.272314
157.7	-0.323886	-0.264628
157.8	-0.329638	-0.255881
157.9	-0.335968	-0.245925
158	-0.342909	-0.23461
158.1	-0.350481	-0.221795
158.2	-0.358664	-0.207338
158.3	-0.367354	-0.191035
158.4	-0.376434	-0.172816
158.5	-0.385741	-0.152533
158.6	-0.395084	-0.130122
158.7	-0.40422	-0.10561
158.8	-0.412855	-0.0789913
158.9	-0.420706	-0.0503943
159	-0.427511	-0.0199111
159.1	-0.433038	0.0122804
159.2	-0.437044	0.0459552
159.3	-0.439302	0.0808477
159.4	-0.439619	0.1166
159.5	-0.437822	0.152941
159.6	-0.433832	0.189531
159.7	-0.427599	0.226055
159.8	-0.419109	0.262224
159.9	-0.408396	0.297694
160	-0.395488	0.332258
160.1	-0.380449	0.365577
160.2	-0.36338	0.397444
160.3	-0.344412	0.427666
160.4	-0.323705	0.455981
160.5	-0.301437	0.482181
160.6	-0.277848	0.506001
160.7	-0.253187	0.527162
160.8	-0.227767	0.545411
160.9	-0.201869	0.560405
161	-0.175793	0.571839
161.1	-0.149891	0.579368
161.2	-0.124491	0.582675
161.3	-0.0999897	0.581523
161.4	-0.0767436	0.575674
161.5	-0.0550649	0.564985
161.6	-0.0352016	0.549383
161.7	-0.0174147	0.528837
161.8	-0.00184257	0.503487
161.9	0.0113732	0.473547
162	0.0221999	0.439414
162.1	0.0306342	0.401504
162.2	0.0367786	0.360328
162.3	0.0407646	0.316544
162.4	0.0427347	0.270815
162.5	0.0428616	0.223909
162.6	0.0413508	0.176541
162.7	0.0384195	0.129431
162.8	0.0342345	0.0833478
162.9	0.028987	0.0389035
163	0.0228406	-0.00328783
163.1	0.0159366	-0.0427231
163.2	0.0083647	-0.0790158
163.3	0.000238933	-0.111825
163.4	-0.00839684	-0.140967
163.5	-0.0174839	-0.166335
163.6	-0.0269343	-0.187913
163.7	-0.0367158	-0.205844
163.8	-0.0466977	-0.220309
163.9	-0.0567565	-0.231662
164	-0.0666967	-0.240206
164.1	-0.0763022	-0.246351
164.2	-0.0853501	-0.250546
164.3	-0.0935523	-0.253249
164.4	-0.100663	-0.254945
164.5	-0.106373	-0.256046
164.6	-0.110435	-0.256979
164.7	-0.112599	-0.258069
164.8	-0.112707	-0.259539
164.9	-0.110632	-0.261613
165	-0.106341	-0.264359
165.1	-0.0998181	-0.267758
165.2	-0.0911601	-0.271759
165.3	-0.0805094	-0.276174
165.4	-0.0680575	-0.28078
165.5	-0.0540629	-0.285216
165.6	-0.0388042	-0.289146
165.7	-0.0226166	-0.292209
165.8	-0.0057863	-0.294039
165.9	0.0113867	-0.294281
166	0.0286852	-0.292565
166.1	0.0459229	-0.288613
166.2	0.062973	-0.282214
166.3	0.0797425	-0.273192
166.4	0.0962277	-0.261515
166.5	0.112463	-0.247216
166.6	0.128509	-0.230404
166.7	0.144444	-0.211279
166.8	0.160358	-0.190084
166.9	0.176369	-0.167209
167	0.19258	-0.143036
167.1	0.209094	-0.118002
167.2	0.225924	-0.0926387
167.3	0.243065	-0.0674011
167.4	0.260427	-0.0428075
167.5	0.277899	-0.0192678
167.6	0.295332	0.00277344
167.7	0.312521	0.0229242
167.8	0.329248	0.0409105
167.9	0.345274	0.0564349
168	0.360335	0.0693304
168.1	0.374189	0.0795542
168.2	0.386602	0.0870396
168.3	0.397397	0.0918732
168.4	0.406381	0.0941179
168.5	0.413433	0.0939843
168.6	0.418481	0.0916282
168.7	0.421466	0.0872546
168.8	0.422409	0.0810814
168.9	0.421326	0.073267
169	0.418259	0.0640235
169.1	0.413317	0.0535462
169.2	0.406597	0.0419603
169.3	0.398254	0.0294546
169.4	0.388413	0.016085
169.5	0.377175	0.00197011
169.6	0.36462	-0.0127974
169.7	0.350861	-0.0281393
169.8	0.335937	-0.0439103
169.9	0.319925	-0.0599927
170	0.302878	-0.0761942
170.1	0.284899	-0.092286
170.2	0.266002	-0.108081
170.3	0.246236	-0.123317
170.4	0.225669	-0.137758
170.5	0.204365	-0.151126
170.6	0.182437	-0.163131
170.7	0.159976	-0.173567
170.8	0.137137	-0.182181
170.9	0.114096	-0.188807
171	0.0909566	-0.193262
171.1	0.0678953	-0.195467
171.2	0.0447655	-0.195414
171.3	0.0220332	-0.193138
171.4	-9.03456e-05	-0.188767
171.5	-0.0214204	-0.182436
171.6	-0.041739	-0.174357
171.7	-0.0609001	-0.164784
171.8	-0.0787615	-0.153955
171.9	-0.0951757	-0.14218
172	-0.109967	-0.129776
172.1	-0.12298	-0.117098
172.2	-0.13411	-0.104497
172.3	-0.143245	-0.092249
172.4	-0.150256	-0.080669
172.5	-0.155055	-0.0700165
172.6	-0.157584	-0.060522
172.7	-0.157826	-0.0524028
172.8	-0.155757	-0.0457997
172.9	-0.151469	-0.0408257
173	-0.145072	-0.0375355
173.1	-0.136775	-0.0359432
173.2	-0.126772	-0.0360404
173.3	-0.115322	-0.0377516
173.4	-0.102743	-0.0409784
173.5	-0.0893765	-0.045568
173.6	-0.0755719	-0.0513821
173.7	-0.0616577	-0.0582775
173.8	-0.0479517	-0.0660104
173.9	-0.0346975	-0.0744402
174	-0.0221695	-0.0833936
174.1	-0.0105644	-0.0927332
174.2	3.32843e-06	-0.102295
174.3	0.00946096	-0.111905
174.4	0.0178118	-0.121485
174.5	0.0251088	-0.130893
174.6	0.0314582	-0.140054
174.7	0.0369561	-0.148881
174.8	0.0416841	-0.157286
174.9	0.0457499	-0.165222
175	0.0492172	-0.172615
175.1	0.0520988	-0.17944
175.2	0.0543879	-0.185626
175.3	0.0560026	-0.191094
175.4	0.0568613	-0.195801
175.5	0.0568224	-0.199695
175.6	0.0557389	-0.202714
175.7	0.053411	-0.204809
175.8	0.0496365	-0.205932
175.9	0.0442111	-0.206047
176	0.0369814	-0.205077
176.1	0.0278457	-0.203029
176.2	0.0167596	-0.199848
176.3	0.00372601	-0.195484
176.4	-0.011099	-0.189946
176.5	-0.0275719	-0.18326
176.6	-0.0454638	-0.175439
176.7	-0.0644806	-0.166495
176.8	-0.0843073	-0.156456
176.9	-0.104618	-0.145396
177	-0.125063	-0.133384
177.1	-0.145297	-0.120587
177.2	-0.16496	-0.107109
177.3	-0.18376	-0.0930671
177.4	-0.201446	-0.0785871
177.5	-0.217803	-0.0638016
177.6	-0.232658	-0.0488899
177.7	-0.24589	-0.0339736
177.8	-0.257409	-0.019198
177.9	-0.267166	-0.00471145
178	-0.275183	0.00944907
178.1	-0.281532	0.0231694
178.2	-0.28622	0.0363774
178.3	-0.289327	0.0490458
178.4	-0.290917	0.0611154
178.5	-0.291083	0.0725897
178.6	-0.289959	0.0834615
178.7	-0.287652	0.0937529
178.8	-0.284355	0.103538
178.9	-0.28025	0.112858
179	-0.275554	0.121803
179.1	-0.270505	0.130426
179.2	-0.265347	0.138825
179.3	-0.260371	0.147146
179.4	-0.255883	0.155451
179.5	-0.252193	0.163917
179.6	-0.249597	0.172595
179.7	-0.248318	0.181584
179.8	-0.248547	0.191018
179.9	-0.250448	0.200915
180	-0.254107	0.211387
180.1	-0.259508	0.222456
180.2	-0.26652	0.234139
180.3	-0.274956	0.246451
180.4	-0.28458	0.25928
180.5	-0.295077	0.27258
180.6	-0.306048	0.286198
180.7	-0.317049	0.29997
180.8	-0.327682	0.313745
180.9	-0.337495	0.327312
181	-0.346047	0.340512
181.1	-0.352963	0.353095
181.2	-0.357952	0.364865
181.3	-0.360767	0.375598
181.4	-0.361246	0.385075
181.5	-0.359289	0.393165
181.6	-0.354879	0.399717
181.7	-0.348036	0.404619
181.8	-0.33884	0.407776
181.9	-0.327454	0.409106
182	-0.313985	0.408617
182.1	-0.298585	0.406286
182.2	-0.281435	0.4021
182.3	-0.262719	0.396156
182.4	-0.242576	0.388587
182.5	-0.221109	0.379522
182.6	-0.198444	0.369073
182.7	-0.174688	0.357358
182.8	-0.149949	0.344634
182.9	-0.124387	0.331094
183	-0.0980936	0.316956
183.1	-0.0712496	0.302438
183.2	-0.0440198	0.287733
183.3	-0.0166415	0.273111
183.4	0.010571	0.258726
183.5	0.0373094	0.244848
183.6	0.0632449	0.23167
183.7	0.0880685	0.219355
183.8	0.111467	0.208088
183.9	0.133166	0.19796
184	0.152888	0.189026
184.1	0.170444	0.181303
184.2	0.18568	0.174699
184.3	0.198582	0.169172
184.4	0.209147	0.164584
184.5	0.217543	0.160848
184.6	0.223999	0.157726
184.7	0.228801	0.154942
184.8	0.232275	0.152307
184.9	0.234818	0.149566
185	0.236834	0.146572
185.1	0.238685	0.14312
185.2	0.240731	0.139046
185.3	0.243331	0.134253
185.4	0.246741	0.128639
185.5	0.251127	0.122238
185.6	0.256569	0.115045
185.7	0.263019	0.107075
185.8	0.270393	0.0984517
185.9	0.278467	0.0892383
186	0.287025	0.079548
186.1	0.295791	0.0694652
186.2	0.304409	0.0590976
186.3	0.312536	0.0485717
186.4	0.319831	0.0379425
186.5	0.326006	0.027278
186.6	0.33082	0.0165686
186.7	0.33406	0.00579629
186.8	0.335617	-0.00504042
186.9	0.335442	-0.0159667
187	0.333592	-0.026981
187.1	0.330123	-0.0380881
187.2	0.325184	-0.0493351
187.3	0.31897	-0.0606707
187.4	0.311712	-0.0720891
187.5	0.303713	-0.0835746
187.6	0.295211	-0.0950408
187.7	0.286465	-0.106409
187.8	0.277699	-0.11754
187.9	0.269128	-0.128261
188	0.260894	-0.138517
188.1	0.253113	-0.148175
188.2	0.245858	-0.157095
188.3	0.239169	-0.165088
188.4	0.23305	-0.171952
188.5	0.227489	-0.177513
188.6	0.222426	-0.181587
188.7	0.217774	-0.184067
188.8	0.213457	-0.184858
188.9	0.209403	-0.183888
189	0.205511	-0.181101
189.1	0.201721	-0.176471
189.2	0.197891	-0.170016
189.3	0.193872	-0.161785
189.4	0.189556	-0.151899
189.5	0.184832	-0.140482
189.6	0.179598	-0.127696
189.7	0.173665	-0.113719
189.8	0.166914	-0.0987678
189.9	0.159237	-0.0830775
190	0.150481	-0.0668598
190.1	0.140544	-0.0503331
190.2	0.129329	-0.0336989
190.3	0.116869	-0.01722
190.4	0.103165	-0.00110978
190.5	0.0882878	0.0144544
190.6	0.0724255	0.0293004
190.7	0.0557825	0.0432987
190.8	0.038657	0.0562414
190.9	0.0213938	0.0679575
191	0.00435415	0.0783331
191.1	-0.0120248	0.087218
191.2	-0.0272891	0.0944596
191.3	-0.0409769	0.0999172
191.4	-0.0526807	0.103466
191.5	-0.0620232	0.104954
191.6	-0.0686652	0.10427
191.7	-0.0723551	0.101303
191.8	-0.0728978	0.0959901
191.9	-0.0702027	0.088254
192	-0.0642517	0.0780906
192.1	-0.0551701	0.0655044
192.2	-0.0431565	0.050573
192.3	-0.0285432	0.0334072
192.4	-0.0116857	0.0141647
192.5	0.00697803	-0.00692982
192.6	0.0269488	-0.0295451
192.7	0.0477298	-0.0532895
192.8	0.0688187	-0.0777256
192.9	0.0896762	-0.102365
193	0.109812	-0.126713
193.1	0.128795	-0.150162
193.2	0.14624	-0.172141
193.3	0.161861	-0.192084
193.4	0.17543	-0.209439
193.5	0.186849	-0.223736
193.6	0.196068	-0.234582
193.7	0.203125	-0.241668
193.8	0.208104	-0.244786
193.9	0.211151	-0.243845
194	0.212385	-0.238914
194.1	0.211936	-0.230164
194.2	0.20996	-0.217909
194.3	0.206563	-0.202586
194.4	0.201792	-0.184691
194.5	0.195633	-0.164814
194.6	0.188086	-0.143577
194.7	0.179105	-0.121614
194.8	0.168649	-0.0996017
194.9	0.156598	-0.0781387
195	0.142838	-0.0577113
195.1	0.127341	-0.0387704
195.2	0.110105	-0.0216272
195.3	0.0912256	-0.0065555
195.4	0.0708208	0.00630486
195.5	0.0491143	0.0168755
195.6	0.0264813	0.0251971
195.7	0.0033255	0.03135
195.8	-0.0198617	0.0354962
195.9	-0.0425694	0.0377856
196	-0.064212	0.0383771
196.1	-0.0842377	0.0374739
196.2	-0.102117	0.0351976
196.3	-0.117384	0.03164
196.4	-0.129685	0.0268841
196.5	-0.138784	0.0209633
196.6	-0.1446	0.0139194
196.7	-0.14717	0.00579208
196.8	-0.146675	-0.00336135
196.9	-0.143497	-0.0135178
197	-0.138076	-0.0245714
197.1	-0.130981	-0.0363708
197.2	-0.122772	-0.0487253
197.3	-0.114123	-0.0613743
197.4	-0.105742	-0.0740296
197.5	-0.0982833	-0.086361
197.6	-0.0923292	-0.0980161
197.7	-0.0883348	-0.108619
197.8	-0.0867308	-0.117786
197.9	-0.08779	-0.125129
198	-0.0916196	-0.130358
198.1	-0.0982088	-0.133253
198.2	-0.107405	-0.13362
198.3	-0.119006	-0.131371
198.4	-0.1327	-0.126546
198.5	-0.148107	-0.119272
198.6	-0.164796	-0.109739
198.7	-0.182324	-0.0982277
198.8	-0.200303	-0.0850536
198.9	-0.21835	-0.0705909
199	-0.236154	-0.0552952
199.1	-0.253455	-0.0395975
199.2	-0.270107	-0.023912
199.3	-0.285961	-0.00870484
199.4	-0.300944	0.00564605
199.5	-0.315037	0.0187662
199.6	-0.328279	0.0303081
199.7	-0.340723	0.0400022
[truncated: 5,003 more rows]

## Sheet: 17n06053.abf
	current (pA)
Time (ms)	30 uM 5-HT	100 uM cocaine
0	-0.137357	0.208129
0.0996094	-0.114486	0.200964
0.200195	-0.0901016	0.193679
0.299805	-0.0644232	0.1863
0.400391	-0.0377175	0.178867
0.5	-0.0102807	0.171434
0.599609	0.0175521	0.164086
0.700195	0.0453938	0.1569
0.799805	0.0728281	0.150008
0.900391	0.0993962	0.143597
1	0.124592	0.137845
1.09961	0.147939	0.132948
1.2002	0.168942	0.129094
1.2998	0.187154	0.126416
1.40039	0.202117	0.125089
1.5	0.213448	0.125202
1.59961	0.220857	0.126845
1.7002	0.224133	0.130027
1.7998	0.223143	0.13473
1.90039	0.217859	0.140856
2	0.208356	0.148223
2.09961	0.194807	0.156581
2.2002	0.177508	0.165637
2.2998	0.156884	0.175007
2.40039	0.133365	0.184293
2.5	0.107471	0.193077
2.59961	0.0797955	0.200967
2.7002	0.0509328	0.207603
2.7998	0.0215414	0.212616
2.90039	-0.00777507	0.215765
3	-0.036396	0.216842
3.09961	-0.0637585	0.215774
3.2002	-0.089359	0.212547
3.2998	-0.112781	0.20723
3.40039	-0.13371	0.199986
3.5	-0.151906	0.191075
3.59961	-0.167247	0.180795
3.7002	-0.179673	0.169451
3.7998	-0.18923	0.157451
3.90039	-0.19609	0.145132
4	-0.2005	0.132834
4.09961	-0.202805	0.120825
4.2002	-0.203401	0.109343
4.2998	-0.202732	0.0985687
4.40039	-0.201265	0.0886147
4.5	-0.199468	0.0795479
4.59961	-0.197784	0.0713456
4.7002	-0.196621	0.0639524
4.7998	-0.196333	0.0572736
4.90039	-0.197211	0.051208
5	-0.199471	0.0456493
5.09961	-0.203217	0.0404768
5.2002	-0.208445	0.0356121
5.2998	-0.215065	0.0309551
5.40039	-0.222868	0.0264425
5.5	-0.231604	0.0220265
5.59961	-0.240938	0.0177042
5.7002	-0.250504	0.013555
5.7998	-0.259901	0.00961304
5.90039	-0.268664	0.00597882
6	-0.276402	0.00273228
6.09961	-0.282748	-2.38419e-05
6.2002	-0.287408	-0.00217628
6.2998	-0.290154	-0.00359654
6.40039	-0.290865	-0.0041306
6.5	-0.289529	-0.00364661
6.59961	-0.286152	-0.00199294
6.7002	-0.280867	0.000947475
6.7998	-0.273887	0.00529432
6.90039	-0.265477	0.0111742
7	-0.255999	0.0186546
7.09961	-0.245837	0.0277717
7.2002	-0.235384	0.0385163
7.2998	-0.224976	0.050844
7.40039	-0.214949	0.0646737
7.5	-0.205588	0.0798392
7.59961	-0.197131	0.0961397
7.7002	-0.189736	0.113277
7.7998	-0.183463	0.130966
7.90039	-0.178349	0.148778
8	-0.174333	0.166321
8.09961	-0.171313	0.183152
8.2002	-0.169109	0.198808
8.2998	-0.167498	0.212842
8.40039	-0.166241	0.22483
8.5	-0.165069	0.234393
8.59961	-0.163725	0.241194
8.7002	-0.161934	0.245008
8.7998	-0.159469	0.245667
8.90039	-0.156105	0.243047
9	-0.151677	0.237181
9.09961	-0.146032	0.228163
9.2002	-0.139066	0.216216
9.2998	-0.130744	0.201634
9.40039	-0.121047	0.184744
9.5	-0.110031	0.165964
9.59961	-0.0978078	0.145738
9.7002	-0.0845287	0.124509
9.7998	-0.0703729	0.102744
9.90039	-0.0555143	0.0808847
10	-0.0402089	0.0593579
10.0996	-0.0246681	0.0385532
10.2002	-0.00916529	0.0188522
10.2998	0.00600839	0.000573397
10.4004	0.0206352	-0.0159988
10.5	0.0344923	-0.0306323
10.5996	0.0473709	-0.0431089
10.7002	0.0591155	-0.0532589
10.7998	0.0695504	-0.0609026
10.9004	0.0785835	-0.0658951
11	0.0861179	-0.0680859
11.0996	0.0921476	-0.067342
11.2002	0.0966771	-0.063565
11.2998	0.0997329	-0.0566564
11.4004	0.101365	-0.046545
11.5	0.101644	-0.0332351
11.5996	0.100676	-0.0168049
11.7002	0.0985786	0.00264001
11.7998	0.0954766	0.0248618
11.9004	0.0915064	0.0495381
12	0.086796	0.0762391
12.0996	0.0815032	0.104431
12.2002	0.07577	0.133486
12.2998	0.0697715	0.162713
12.4004	0.0636712	0.191304
12.5	0.0576403	0.218463
12.5996	0.0518641	0.243326
12.7002	0.0464919	0.26508
12.7998	0.0417119	0.282965
12.9004	0.0376822	0.296292
13	0.034546	0.30454
13.0996	0.0324585	0.307292
13.2002	0.0315633	0.304317
13.2998	0.0319715	0.29557
13.4004	0.0337645	0.281183
13.5	0.0370079	0.261491
13.5996	0.0416894	0.236951
13.7002	0.0478342	0.208178
13.7998	0.0553979	0.17595
13.9004	0.064327	0.141107
14	0.0745381	0.104605
14.0996	0.0859277	0.06742
14.2002	0.0984304	0.0304964
14.2998	0.11186	-0.00527024
14.4004	0.126125	-0.0390508
14.5	0.141113	-0.0700834
14.5996	0.156676	-0.0977314
14.7002	0.172676	-0.121472
14.7998	0.188974	-0.140926
14.9004	0.205429	-0.155822
15	0.221889	-0.166075
15.0996	0.238188	-0.171749
15.2002	0.254163	-0.173018
15.2998	0.269608	-0.170162
15.4004	0.284324	-0.163507
15.5	0.298066	-0.153483
15.5996	0.310597	-0.140548
15.7002	0.321664	-0.125237
15.7998	0.331001	-0.10807
15.9004	0.338367	-0.0895028
16	0.343539	-0.0699902
16.0996	0.346305	-0.049943
16.2002	0.346472	-0.0296819
16.2998	0.343905	-0.00942755
16.4004	0.338519	0.0106518
16.5	0.330321	0.0305021
16.5996	0.319365	0.0501451
16.7002	0.305771	0.0696306
16.7998	0.289746	0.0891378
16.9004	0.271562	0.108877
17	0.251561	0.129048
17.0996	0.230098	0.149903
17.2002	0.207599	0.171605
17.2998	0.184466	0.194335
17.4004	0.161141	0.218195
17.5	0.138049	0.243201
17.5996	0.115575	0.269297
17.7002	0.0940652	0.296321
17.7998	0.0738215	0.324014
17.9004	0.0550854	0.351994
18	0.0380765	0.379805
18.0996	0.0229198	0.406924
18.2002	0.00970149	0.432755
18.2998	-0.00152111	0.456713
18.4004	-0.0107723	0.478191
18.5	-0.0180982	0.496604
18.5996	-0.0235902	0.511416
18.7002	-0.0273422	0.522188
18.7998	-0.0294688	0.528592
18.9004	-0.0300872	0.530383
19	-0.0293237	0.527467
19.0996	-0.0273051	0.51993
19.2002	-0.0241319	0.50798
19.2998	-0.01993	0.491956
19.4004	-0.0147979	0.472333
19.5	-0.00885046	0.449697
19.5996	-0.00218678	0.424736
19.7002	0.00509787	0.398151
19.7998	0.0128969	0.370692
19.9004	0.0211128	0.343183
20	0.0296592	0.316387
20.0996	0.038439	0.291046
20.2002	0.0473087	0.2678
20.2998	0.0561527	0.247216
20.4004	0.0648148	0.229752
20.5	0.0731584	0.215764
20.5996	0.081041	0.205512
20.7002	0.0883106	0.199111
20.7998	0.0948588	0.196556
20.9004	0.100541	0.197709
21	0.105219	0.202324
21.0996	0.108767	0.210099
21.2002	0.111092	0.220617
21.2998	0.112128	0.233443
21.4004	0.111813	0.248058
21.5	0.110121	0.263936
21.5996	0.107024	0.28052
21.7002	0.102543	0.297284
21.7998	0.0967667	0.313668
21.9004	0.0897721	0.32919
22	0.0816648	0.343396
22.0996	0.0725645	0.355901
22.2002	0.0625788	0.366356
22.2998	0.0519058	0.374478
22.4004	0.0406603	0.380054
22.5	0.0290272	0.382958
22.5996	0.017192	0.383126
22.7002	0.00535786	0.38057
22.7998	-0.00628114	0.375375
22.9004	-0.0175073	0.367661
23	-0.0281345	0.357643
23.0996	-0.0379612	0.345592
23.2002	-0.0467975	0.331821
23.2998	-0.0544634	0.316699
23.4004	-0.0608051	0.300594
23.5	-0.0657101	0.283895
23.5996	-0.0691123	0.267024
23.7002	-0.07099	0.250403
23.7998	-0.0713394	0.234428
23.9004	-0.0701939	0.219479
24	-0.0676824	0.205873
24.0996	-0.0639739	0.193897
24.2002	-0.0592785	0.183732
24.2998	-0.0538859	0.175484
24.4004	-0.0480856	0.169215
24.5	-0.0422349	0.164845
24.5996	-0.0366751	0.162238
24.7002	-0.0317603	0.161183
24.7998	-0.027854	0.16135
24.9004	-0.0252807	0.162401
25	-0.0243469	0.163913
25.0996	-0.0252844	0.165437
25.2002	-0.0282931	0.166539
25.2998	-0.0334592	0.166788
25.4004	-0.0408244	0.165842
25.5	-0.050334	0.163377
25.5996	-0.0618227	0.159151
25.7002	-0.0750891	0.153032
25.7998	-0.0898271	0.144995
25.9004	-0.105688	0.135128
26	-0.122252	0.123588
26.0996	-0.139064	0.110627
26.2002	-0.15562	0.0965629
26.2998	-0.171412	0.0817761
26.4004	-0.18593	0.0666978
26.5	-0.198672	0.0517523
26.5996	-0.209198	0.0373769
26.7002	-0.217169	0.0239534
26.7998	-0.222271	0.0118129
26.9004	-0.224306	0.00120497
27	-0.223107	-0.00767922
27.0996	-0.218663	-0.0147493
27.2002	-0.211048	-0.0199499
27.2998	-0.200451	-0.0233326
27.4004	-0.187176	-0.0249934
27.5	-0.171583	-0.0250778
27.5996	-0.154135	-0.0237877
27.7002	-0.135364	-0.0213103
27.7998	-0.115823	-0.017873
27.9004	-0.0960883	-0.0137405
28	-0.0767795	-0.00911665
28.0996	-0.058479	-0.00419998
28.2002	-0.0417584	0.000864029
28.2998	-0.0271239	0.00593281
28.4004	-0.0149748	0.0109158
28.5	-0.00566888	0.0157375
28.5996	0.000542164	0.0203543
28.7002	0.0035342	0.0247412
28.7998	0.00324202	0.0288825
28.9004	-0.000229836	0.0328002
29	-0.00668192	0.036514
29.0996	-0.0158266	0.0400479
29.2002	-0.0273018	0.0434403
29.2998	-0.0406588	0.0467184
29.4004	-0.0553995	0.0499442
29.5	-0.0709845	0.0531392
29.5996	-0.0868231	0.0563884
29.7002	-0.102384	0.0597222
29.7998	-0.117176	0.0632215
29.9004	-0.130711	0.0669279
30	-0.142609	0.0708537
30.0996	-0.152548	0.0750542
30.2002	-0.160297	0.0795808
30.2998	-0.165726	0.0844696
30.4004	-0.168775	0.0897121
30.5	-0.16951	0.0952957
30.5996	-0.168082	0.101177
30.7002	-0.164695	0.107306
30.7998	-0.159619	0.113616
30.9004	-0.153181	0.120018
31	-0.145693	0.126425
31.0996	-0.137487	0.132703
31.2002	-0.128901	0.138752
31.2998	-0.12025	0.144443
31.4004	-0.111811	0.14968
31.5	-0.103784	0.154391
31.5996	-0.0963321	0.158475
31.7002	-0.0895429	0.161865
31.7998	-0.0834782	0.164476
31.9004	-0.0781506	0.166269
32	-0.0734848	0.167253
32.0996	-0.0693861	0.167408
32.2002	-0.0657197	0.166758
32.2998	-0.0623287	0.165296
32.4004	-0.0590492	0.163057
32.5	-0.0557194	0.160086
32.5996	-0.0521877	0.156375
32.7002	-0.0482872	0.151961
32.7998	-0.0438977	0.14685
32.9004	-0.038867	0.141027
33	-0.0331277	0.134477
33.0996	-0.0266336	0.127171
33.2002	-0.0193498	0.119089
33.2998	-0.011245	0.110194
33.4004	-0.00233674	0.100459
33.5	0.00731277	0.0898676
33.5996	0.017646	0.0784276
33.7002	0.0286069	0.0661888
33.7998	0.0400858	0.0532017
33.9004	0.0520035	0.0395589
34	0.0642691	0.0253999
34.0996	0.0767511	0.0109198
34.2002	0.0893261	-0.00366259
34.2998	0.101874	-0.0180781
34.4004	0.114254	-0.0320776
34.5	0.126316	-0.0453546
34.5996	0.137934	-0.0576212
34.7002	0.148978	-0.0685751
34.7998	0.159282	-0.0779266
34.9004	0.168718	-0.0854106
35	0.17713	-0.0908353
35.0996	0.184397	-0.0940921
35.2002	0.190402	-0.095118
35.2998	0.195065	-0.0939026
35.4004	0.198348	-0.0905654
35.5	0.200187	-0.085283
35.5996	0.200543	-0.0782588
35.7002	0.199413	-0.0697875
35.7998	0.196814	-0.0601552
35.9004	0.192777	-0.0497167
36	0.187357	-0.0387831
36.0996	0.180607	-0.0276968
36.2002	0.172617	-0.0167432
36.2998	0.16343	-0.00613928
36.4004	0.153143	0.00392866
36.5	0.141866	0.0133743
36.5996	0.12966	0.0221853
36.7002	0.116623	0.0304124
36.7998	0.102847	0.0381851
36.9004	0.0884321	0.0456698
37	0.0735055	0.0530851
37.0996	0.0581599	0.0606632
37.2002	0.0425714	0.0686502
37.2998	0.02687	0.0772929
37.4004	0.0112418	0.0868099
37.5	-0.0041672	0.0974102
37.5996	-0.0192072	0.109197
37.7002	-0.0336527	0.122215
37.7998	-0.0473248	0.13642
37.9004	-0.0600051	0.151721
38	-0.071501	0.167999
38.0996	-0.0816587	0.185001
38.2002	-0.0903691	0.202445
38.2998	-0.0975291	0.220039
38.4004	-0.103086	0.237476
38.5	-0.107009	0.25441
38.5996	-0.109298	0.270493
38.7002	-0.110034	0.285408
38.7998	-0.109315	0.298884
38.9004	-0.107282	0.31073
39	-0.104103	0.320758
39.0996	-0.0999556	0.328874
39.2002	-0.095047	0.335011
39.2998	-0.0895853	0.339218
39.4004	-0.0838039	0.341592
39.5	-0.0779245	0.3423
39.5996	-0.0721712	0.341524
39.7002	-0.0667443	0.33949
39.7998	-0.0617914	0.336493
39.9004	-0.0574465	0.332798
40	-0.0538254	0.328672
40.0996	-0.0510401	0.324423
40.2002	-0.0491954	0.320252
40.2998	-0.0483549	0.316401
40.4004	-0.0485405	0.313002
40.5	-0.0497662	0.31016
40.5996	-0.0520726	0.307975
40.7002	-0.05547	0.306447
40.7998	-0.0599501	0.305554
40.9004	-0.0655549	0.305214
41	-0.0722317	0.305363
41.0996	-0.0799903	0.305877
41.2002	-0.0887885	0.306583
41.2998	-0.0986296	0.307343
41.4004	-0.109491	0.307968
41.5	-0.121309	0.308328
41.5996	-0.134069	0.308298
41.7002	-0.147697	0.307767
41.7998	-0.162102	0.306628
41.9004	-0.177195	0.304776
42	-0.192838	0.302154
42.0996	-0.208927	0.298676
42.2002	-0.225299	0.294307
42.2998	-0.24181	0.289019
42.4004	-0.258282	0.282803
42.5	-0.274493	0.275645
42.5996	-0.290271	0.267549
42.7002	-0.305408	0.258509
42.7998	-0.319703	0.248512
42.9004	-0.332975	0.23757
43	-0.345052	0.225706
43.0996	-0.355777	0.212973
43.2002	-0.364981	0.199417
43.2998	-0.372525	0.185079
43.4004	-0.378314	0.170074
43.5	-0.382212	0.154514
43.5996	-0.384155	0.138475
43.7002	-0.38409	0.122093
43.7998	-0.381997	0.10545
43.9004	-0.377895	0.0886958
44	-0.371854	0.0719316
44.0996	-0.36396	0.055301
44.2002	-0.354342	0.0389013
44.2998	-0.343155	0.0228188
44.4004	-0.330631	0.00716305
44.5	-0.31702	-0.0080471
44.5996	-0.302617	-0.022768
44.7002	-0.287746	-0.0369413
44.7998	-0.272702	-0.0505373
44.9004	-0.257843	-0.0635018
45	-0.243485	-0.0757749
45.0996	-0.229942	-0.0872722
45.2002	-0.217521	-0.0979142
45.2998	-0.206468	-0.107582
45.4004	-0.197022	-0.116162
45.5	-0.18931	-0.123502
45.5996	-0.183432	-0.129395
45.7002	-0.179426	-0.13366
45.7998	-0.177247	-0.136093
45.9004	-0.176827	-0.136513
46	-0.17797	-0.134768
46.0996	-0.180485	-0.130682
46.2002	-0.184134	-0.124154
46.2998	-0.188684	-0.1151
46.4004	-0.193845	-0.103533
46.5	-0.199353	-0.0894864
46.5996	-0.204996	-0.0730429
46.7002	-0.210545	-0.0543511
46.7998	-0.215845	-0.0336607
46.9004	-0.220753	-0.011277
47	-0.225206	0.0124614
47.0996	-0.229181	0.0371234
47.2002	-0.232692	0.0622663
47.2998	-0.23578	0.087364
47.4004	-0.238516	0.111906
47.5	-0.240992	0.135375
47.5996	-0.243281	0.157256
47.7002	-0.245464	0.177078
47.7998	-0.247617	0.194352
47.9004	-0.249782	0.208692
48	-0.251935	0.219729
48.0996	-0.254038	0.227175
48.2002	-0.256	0.230896
48.2998	-0.257715	0.230795
48.4004	-0.259053	0.2269
48.5	-0.259833	0.219336
48.5996	-0.259829	0.208328
48.7002	-0.25885	0.194188
48.7998	-0.256671	0.177296
48.9004	-0.25315	0.1581
49	-0.248115	0.137087
49.0996	-0.241458	0.114761
49.2002	-0.233148	0.0916746
49.2998	-0.223135	0.0683017
49.4004	-0.211412	0.0451486
49.5	-0.198045	0.0226126
49.5996	-0.183153	0.00105047
49.7002	-0.166932	-0.0192802
49.7998	-0.149585	-0.0381372
49.9004	-0.131341	-0.0554082
50	-0.112482	-0.0710092
50.0996	-0.0932388	-0.0849571
50.2002	-0.0739053	-0.0973399
50.2998	-0.0547582	-0.108287
50.4004	-0.036095	-0.117967
50.5	-0.0181929	-0.126567
50.5996	-0.00129771	-0.134259
50.7002	0.0143559	-0.141232
50.7998	0.0285605	-0.1476
50.9004	0.0411572	-0.153492
51	0.0519969	-0.158978
51.0996	0.0609533	-0.164121
51.2002	0.0679271	-0.168913
51.2998	0.0728737	-0.173269
51.4004	0.0757626	-0.177076
51.5	0.0765722	-0.180194
51.5996	0.0753642	-0.182431
51.7002	0.0722265	-0.183613
51.7998	0.0672889	-0.183535
51.9004	0.06075	-0.182031
52	0.0528322	-0.178953
52.0996	0.0438076	-0.174161
52.2002	0.033977	-0.16758
52.2998	0.0236889	-0.159173
52.4004	0.013351	-0.148963
52.5	0.00336766	-0.137009
52.5996	-0.00580394	-0.123495
52.7002	-0.0137668	-0.108657
52.7998	-0.020139	-0.0927474
52.9004	-0.0245903	-0.0760641
53	-0.0268477	-0.0589635
53.0996	-0.0266907	-0.0418153
53.2002	-0.0239679	-0.0249734
53.2998	-0.0186108	-0.00880837
53.4004	-0.0106542	0.00637484
53.5	-0.000241041	0.0202835
53.5996	0.0124123	0.0326433
53.7002	0.0269768	0.0432734
53.7998	0.043128	0.0520194
53.9004	0.0604582	0.0587704
54	0.0785285	0.063493
54.0996	0.0969403	0.0661619
54.2002	0.115288	0.0668468
54.2998	0.133187	0.0656128
54.4004	0.150295	0.0625963
54.5	0.16635	0.0579133
54.5996	0.181163	0.0517342
54.7002	0.194591	0.0442114
54.7998	0.206561	0.0355268
54.9004	0.21705	0.0258362
55	0.226103	0.0153308
55.0996	0.233831	0.00422955
55.2002	0.240378	-0.00728798
55.2998	0.245875	-0.0189896
55.4004	0.250499	-0.0306568
55.5	0.254408	-0.0420151
55.5996	0.257734	-0.0527937
55.7002	0.260631	-0.0627427
55.7998	0.263207	-0.0715289
55.9004	0.265568	-0.0788796
56	0.267747	-0.0845132
56.0996	0.269804	-0.0881546
56.2002	0.271758	-0.0895963
56.2998	0.27361	-0.0886469
56.4004	0.27535	-0.0852151
56.5	0.276943	-0.0792127
56.5996	0.27836	-0.0707088
56.7002	0.27958	-0.0597947
56.7998	0.280562	-0.0466914
56.9004	0.281319	-0.031698
57	0.281783	-0.0151713
57.0996	0.281985	0.00248218
57.2002	0.28193	0.0208101
57.2998	0.281601	0.0393488
57.4004	0.280988	0.0576179
57.5	0.28011	0.075202
57.5996	0.278973	0.0916941
57.7002	0.277573	0.10679
57.7998	0.275905	0.120208
57.9004	0.273968	0.131818
58	0.271764	0.141559
58.0996	0.269271	0.149502
58.2002	0.266441	0.1558
58.2998	0.263282	0.160673
58.4004	0.259807	0.164443
58.5	0.256024	0.167426
58.5996	0.251932	0.169998
58.7002	0.24754	0.172588
58.7998	0.242856	0.175519
58.9004	0.237883	0.179134
59	0.23264	0.183704
59.0996	0.227159	0.189456
59.2002	0.221431	0.196519
59.2998	0.215464	0.204898
59.4004	0.209289	0.214532
59.5	0.202933	0.225279
59.5996	0.196397	0.236925
59.7002	0.189649	0.24919
59.7998	0.182659	0.261732
59.9004	0.175414	0.274214
60	0.167928	0.286216
60.0996	0.160198	0.297335
60.2002	0.152199	0.307195
60.2998	0.143943	0.315435
60.4004	0.135432	0.321775
60.5	0.126714	0.325986
60.5996	0.117795	0.327913
60.7002	0.108761	0.327444
60.7998	0.0996341	0.324571
60.9004	0.0904909	0.31931
61	0.0813659	0.311823
61.0996	0.0722653	0.302306
61.2002	0.0631694	0.291009
61.2998	0.0540351	0.278242
61.4004	0.0448508	0.264306
61.5	0.0355663	0.24956
61.5996	0.0261209	0.234346
61.7002	0.0164225	0.219005
61.7998	0.00636482	0.20384
61.9004	-0.0040921	0.189117
62	-0.0150213	0.175107
62.0996	-0.0264739	0.162001
62.2002	-0.0384349	0.149943
62.2998	-0.0508335	0.139024
62.4004	-0.0635628	0.129284
62.5	-0.0764724	0.120738
62.5996	-0.089353	0.113344
62.7002	-0.101959	0.106981
62.7998	-0.113979	0.101586
62.9004	-0.125126	0.0970082
63	-0.135062	0.093147
63.0996	-0.14349	0.0898829
63.2002	-0.150142	0.0871105
63.2998	-0.154786	0.0847416
63.4004	-0.15728	0.0826814
63.5	-0.157572	0.0808551
63.5996	-0.155633	0.0792205
63.7002	-0.151536	0.0777078
63.7998	-0.145429	0.0762799
63.9004	-0.137581	0.0748997
64	-0.128294	0.0735347
64.0996	-0.117965	0.07214
64.2002	-0.107005	0.0706692
64.2998	-0.0958461	0.0690372
64.4004	-0.0849468	0.067205
64.5	-0.0747304	0.0650682
64.5996	-0.0656295	0.0626397
64.7002	-0.0579545	0.0598764
64.7998	-0.0519999	0.0568051
64.9004	-0.0479715	0.0534508
65	-0.0459967	0.0498595
65.0996	-0.0461609	0.0461538
65.2002	-0.0484331	0.0424645
65.2998	-0.0527079	0.0389659
65.4004	-0.0587885	0.0358531
65.5	-0.0664524	0.0333378
65.5996	-0.0753812	0.0316479
65.7002	-0.0852364	0.0309947
65.7998	-0.0956622	0.0315819
65.9004	-0.106296	0.0335622
66	-0.116768	0.0370183
66.0996	-0.126704	0.041976
66.2002	-0.135717	0.0483849
66.2998	-0.143519	0.0561521
66.4004	-0.149845	0.0651248
66.5	-0.154458	0.0751264
66.5996	-0.157148	0.0858827
66.7002	-0.157807	0.0971267
66.7998	-0.156332	0.108606
66.9004	-0.152712	0.120042
67	-0.146984	0.131228
67.0996	-0.139252	0.141969
67.2002	-0.129663	0.152115
67.2998	-0.118404	0.161582
67.4004	-0.105733	0.170335
67.5	-0.0919182	0.178389
67.5996	-0.0772239	0.185772
67.7002	-0.061955	0.192549
67.7998	-0.0463918	0.19874
67.9004	-0.0308787	0.204374
68	-0.0157176	0.209471
68.0996	-0.00120103	0.213989
68.2002	0.0124061	0.217842
68.2998	0.0248483	0.22091
68.4004	0.0358826	0.222992
68.5	0.0453327	0.223829
68.5996	0.0530711	0.223161
68.7002	0.0589646	0.220725
68.7998	0.0629543	0.216189
68.9004	0.0650005	0.209349
69	0.0651219	0.199986
69.0996	0.0633931	0.187972
69.2002	0.0598866	0.173268
69.2998	0.0547224	0.155942
69.4004	0.0479929	0.136123
69.5	0.0398681	0.114047
69.5996	0.0305412	0.0900588
69.7002	0.0202242	0.0645397
69.7998	0.0091548	0.0379567
69.9004	-0.00245309	0.0108116
70	-0.0143446	-0.0164087
70.0996	-0.0263529	-0.0432103
70.2002	-0.0382413	-0.0691442
70.2998	-0.0498407	-0.0937943
70.4004	-0.0609324	-0.116836
70.5	-0.0713549	-0.137972
70.5996	-0.0809546	-0.156985
70.7002	-0.0896109	-0.173697
70.7998	-0.0972551	-0.188069
70.9004	-0.103819	-0.200055
71	-0.109318	-0.209705
71.0996	-0.113754	-0.217101
71.2002	-0.117147	-0.222315
71.2998	-0.119556	-0.225457
71.4004	-0.12105	-0.226626
71.5	-0.121709	-0.22592
71.5996	-0.121673	-0.223439
71.7002	-0.121093	-0.219265
71.7998	-0.12006	-0.213537
71.9004	-0.118632	-0.206378
72	-0.116862	-0.19791
72.0996	-0.114756	-0.188296
72.2002	-0.112322	-0.177667
72.2998	-0.109508	-0.166235
72.4004	-0.10622	-0.154204
72.5	-0.10232	-0.141812
72.5996	-0.0976419	-0.129316
72.7002	-0.0920511	-0.116956
72.7998	-0.0853567	-0.104996
72.9004	-0.0773576	-0.0936322
73	-0.06789	-0.0830686
73.0996	-0.0568051	-0.0734777
73.2002	-0.044047	-0.0650036
73.2998	-0.029578	-0.0577583
73.4004	-0.013424	-0.0517719
73.5	0.00433707	-0.0470586
73.5996	0.0235374	-0.0435431
73.7002	0.0439507	-0.0411091
73.7998	0.0653234	-0.039643
73.9004	0.0873263	-0.0389705
74	0.109606	-0.038877
74.0996	0.131785	-0.0391698
74.2002	0.153483	-0.0396314
74.2998	0.174347	-0.0400453
74.4004	0.194042	-0.0402627
74.5	0.212256	-0.0401466
74.5996	0.228686	-0.0395217
74.7002	0.243133	-0.0382984
74.7998	0.255414	-0.0364223
74.9004	0.265414	-0.0338857
75	0.273038	-0.0307357
75.0996	0.278248	-0.0270154
75.2002	0.281075	-0.0227993
75.2998	0.281564	-0.0182402
75.4004	0.279777	-0.0135062
75.5	0.275793	-0.00876164
75.5996	0.269721	-0.00421095
75.7002	0.261658	-3.40939e-05
75.7998	0.251711	0.00360036
75.9004	0.240017	0.00651073
76	0.226662	0.00859642
76.0996	0.211787	0.00972915
76.2002	0.195479	0.00987577
76.2998	0.177869	0.00899959
76.4004	0.159096	0.00714612
76.5	0.139287	0.00443101
76.5996	0.118605	0.000962257
76.7002	0.0971944	-0.00304484
76.7998	0.0752429	-0.00737786
76.9004	0.0529633	-0.0118225
77	0.0305684	-0.01616
77.0996	0.00830889	-0.0201831
77.2002	-0.0135688	-0.0236998
77.2998	-0.0347857	-0.0265646
77.4004	-0.0550878	-0.028636
77.5	-0.0742296	-0.0298464
77.5996	-0.0920086	-0.0301983
77.7002	-0.10821	-0.029716
77.7998	-0.122675	-0.0285184
77.9004	-0.135276	-0.0267382
78	-0.145939	-0.0245621
78.0996	-0.154653	-0.0221777
78.2002	-0.161479	-0.0197427
78.2998	-0.166473	-0.0174408
78.4004	-0.169775	-0.0154142
78.5	-0.171502	-0.0137832
78.5996	-0.171847	-0.0126207
78.7002	-0.170945	-0.0119257
78.7998	-0.169009	-0.0116739
78.9004	-0.166182	-0.0117974
79	-0.162577	-0.0121696
79.0996	-0.158322	-0.0126057
79.2002	-0.153489	-0.0128956
79.2998	-0.148111	-0.0128198
79.4004	-0.142211	-0.0121942
79.5	-0.135814	-0.0108254
79.5996	-0.128922	-0.00854874
79.7002	-0.121537	-0.00522447
79.7998	-0.113684	-0.000732422
79.9004	-0.105393	0.00497603
80	-0.096728	0.0118604
80.0996	-0.0877763	0.0198536
80.2002	-0.07865	0.0288606
80.2998	-0.0694948	0.038753
80.4004	-0.060475	0.0493309
80.5	-0.0518068	0.0603905
80.5996	-0.0437002	0.0717132
80.7002	-0.0363888	0.083082
80.7998	-0.0301138	0.0942683
80.9004	-0.0251135	0.105014
81	-0.0215967	0.115124
81.0996	-0.0197058	0.124424
81.2002	-0.0195541	0.13274
81.2998	-0.0212438	0.139962
81.4004	-0.0248153	0.145922
81.5	-0.030244	0.150523
81.5996	-0.0374314	0.153671
81.7002	-0.046232	0.155312
81.7998	-0.0564706	0.155424
81.9004	-0.0679007	0.154021
82	-0.080247	0.151144
82.0996	-0.0932283	0.146897
82.2002	-0.106529	0.141418
82.2998	-0.119837	0.134846
82.4004	-0.132877	0.127404
82.5	-0.145368	0.119346
82.5996	-0.157068	0.110957
82.7002	-0.167774	0.102542
82.7998	-0.177348	0.0944371
82.9004	-0.185662	0.0869889
83	-0.192646	0.0804977
83.0996	-0.198297	0.0752444
83.2002	-0.202677	0.0714228
83.2998	-0.205828	0.0691988
83.4004	-0.207808	0.0686491
83.5	-0.208683	0.0697441
83.5996	-0.208572	0.0723963
83.7002	-0.207517	0.0763786
83.7998	-0.20559	0.0814481
83.9004	-0.202776	0.087244
84	-0.199049	0.0933993
84.0996	-0.1944	0.0995467
84.2002	-0.188742	0.105259
84.2998	-0.182011	0.110178
84.4004	-0.174121	0.113991
84.5	-0.165015	0.116485
84.5996	-0.15464	0.117536
84.7002	-0.142945	0.117076
84.7998	-0.129984	0.115216
84.9004	-0.115842	0.112129
85	-0.100675	0.108088
85.0996	-0.0847147	0.10344
85.2002	-0.0682414	0.0985606
85.2998	-0.0516279	0.0938838
85.4004	-0.0352535	0.089793
85.5	-0.0195819	0.0866652
85.5996	-0.00505257	0.0847998
85.7002	0.00786555	0.0844169
85.7998	0.0187203	0.0856466
85.9004	0.0271319	0.0885177
86	0.0327655	0.0929563
86.0996	0.0353968	0.0987546
86.2002	0.0348799	0.105597
86.2998	0.0312129	0.113128
86.4004	0.0244601	0.120929
86.5	0.0148064	0.128567
86.5996	0.00254822	0.135582
86.7002	-0.0119321	0.141566
86.7998	-0.0281268	0.146173
86.9004	-0.0455325	0.149099
87	-0.063607	0.150113
87.0996	-0.0817784	0.149053
87.2002	-0.0995053	0.145828
87.2998	-0.11626	0.140443
87.4004	-0.131586	0.13302
87.5	-0.145064	0.123731
87.5996	-0.156405	0.112789
87.7002	-0.16537	0.100467
87.7998	-0.171843	0.087049
87.9004	-0.175783	0.0728047
88	-0.177226	0.0580359
88.0996	-0.176341	0.0429902
88.2002	-0.173327	0.0279002
88.2998	-0.168459	0.0129421
88.4004	-0.162031	-0.00174165
88.5	-0.154343	-0.0160811
88.5996	-0.145732	-0.0300298
88.7002	-0.136513	-0.0436132
88.7998	-0.126982	-0.0568614
88.9004	-0.117421	-0.0698242
89	-0.108064	-0.0826359
89.0996	-0.0991508	-0.0954123
89.2002	-0.0908222	-0.108281
89.2998	-0.0832012	-0.121374
89.4004	-0.0763862	-0.134775
89.5	-0.0704231	-0.148569
89.5996	-0.065323	-0.162787
89.7002	-0.0610523	-0.177459
89.7998	-0.0575784	-0.192503
89.9004	-0.0548488	-0.207839
90	-0.0528214	-0.223327
90.0996	-0.0514318	-0.23878
90.2002	-0.0506195	-0.25398
90.2998	-0.0503128	-0.26863
90.4004	-0.0504225	-0.282454
90.5	-0.0509373	-0.295175
90.5996	-0.0518023	-0.306544
90.7002	-0.0529774	-0.316311
90.7998	-0.0543799	-0.324264
90.9004	-0.0559611	-0.330263
91	-0.0576693	-0.334158
91.0996	-0.0594358	-0.335895
91.2002	-0.0612144	-0.335475
91.2998	-0.0629716	-0.332967
91.4004	-0.0646672	-0.328506
91.5	-0.0662557	-0.322269
91.5996	-0.067669	-0.314476
91.7002	-0.068889	-0.305393
91.7998	-0.0698441	-0.295357
91.9004	-0.0705395	-0.284686
92	-0.0709174	-0.273715
92.0996	-0.0709555	-0.262816
92.2002	-0.0706224	-0.252311
92.2998	-0.069875	-0.242521
92.4004	-0.0686861	-0.233726
92.5	-0.0670414	-0.226228
92.5996	-0.0649772	-0.220299
92.7002	-0.0625019	-0.216133
92.7998	-0.0596297	-0.213929
92.9004	-0.0564002	-0.213804
93	-0.0528505	-0.215816
93.0996	-0.049093	-0.219956
93.2002	-0.0451862	-0.22619
93.2998	-0.0412722	-0.234437
93.4004	-0.0374962	-0.244531
93.5	-0.0340164	-0.256303
93.5996	-0.0309922	-0.269481
93.7002	-0.0285664	-0.283758
93.7998	-0.0268931	-0.29876
93.9004	-0.0261396	-0.314086
94	-0.0264294	-0.329324
94.0996	-0.0278752	-0.344002
94.2002	-0.0305704	-0.357641
94.2998	-0.0345373	-0.369767
94.4004	-0.0397145	-0.379904
94.5	-0.0460147	-0.387631
94.5996	-0.053326	-0.392522
94.7002	-0.0615007	-0.394245
94.7998	-0.0703174	-0.392522
94.9004	-0.079486	-0.387116
95	-0.0886902	-0.377912
95.0996	-0.0975747	-0.364878
95.2002	-0.105785	-0.348124
95.2998	-0.112964	-0.327868
95.4004	-0.118768	-0.304468
95.5	-0.122895	-0.278397
95.5996	-0.125022	-0.250225
95.7002	-0.124942	-0.22061
95.7998	-0.122528	-0.190289
95.9004	-0.1177	-0.159991
96	-0.110471	-0.130482
96.0996	-0.100909	-0.102488
96.2002	-0.0892234	-0.0767245
96.2998	-0.0756675	-0.0537829
96.4004	-0.0605762	-0.0341363
96.5	-0.0443571	-0.0181494
96.5996	-0.0274159	-0.00603127
96.7002	-0.0102232	0.0022254
96.7998	0.00678003	0.00671721
96.9004	0.02315	0.00773263
97	0.0384692	0.00570822
97.0996	0.0523317	0.00115681
97.2002	0.0643729	-0.00525832
97.2998	0.0743463	-0.0128458
97.4004	0.0820192	-0.0208824
97.5	0.0872096	-0.0286479
97.5996	0.0897833	-0.0354738
97.7002	0.0896817	-0.040705
97.7998	0.0868894	-0.0438616
97.9004	0.081445	-0.0445125
98	0.0734477	-0.0423868
98.0996	0.0630282	-0.0372984
98.2002	0.0503269	-0.0292211
98.2998	0.0355635	-0.0182617
98.4004	0.0189638	-0.0045836
98.5	0.00082314	0.0114872
98.5996	-0.018564	0.0295594
98.7002	-0.0388638	0.0491617
98.7998	-0.0597543	0.0697858
98.9004	-0.0808665	0.0909283
99	-0.101834	0.111988
99.0996	-0.122299	0.132412
99.2002	-0.141887	0.151713
99.2998	-0.160281	0.169396
99.4004	-0.177181	0.18503
99.5	-0.192354	0.198201
99.5996	-0.205602	0.208563
99.7002	-0.216745	0.215886
99.7998	-0.225694	0.220017
99.9004	-0.232355	0.220888
100	-0.236744	0.218458
100.1	-0.23884	0.212811
100.2	-0.238703	0.204091
100.3	-0.236397	0.192528
100.4	-0.231985	0.178389
100.5	-0.225562	0.162019
100.6	-0.217169	0.143831
100.7	-0.206914	0.124249
100.8	-0.194902	0.103743
100.9	-0.181253	0.0827625
101	-0.166095	0.0618174
101.1	-0.149502	0.0413508
101.2	-0.131635	0.0218396
101.3	-0.112601	0.00370526
101.4	-0.0925651	-0.0126741
101.5	-0.0717186	-0.026938
101.6	-0.0502847	-0.038806
101.7	-0.0285275	-0.048063
101.8	-0.00668216	-0.0545287
101.9	0.01498	-0.0581434
102	0.0361723	-0.05885
102.1	0.0566142	-0.0567062
102.2	0.0760007	-0.0518165
102.3	0.0940089	-0.0443571
102.4	0.110382	-0.0345986
102.5	0.124874	-0.022809
102.6	0.137296	-0.00936055
102.7	0.14749	0.00535846
102.8	0.15534	0.0209086
102.9	0.160784	0.0368164
103	0.163821	0.0526319
103.1	0.164496	0.0679028
103.2	0.16293	0.0822234
103.3	0.159303	0.0951846
103.4	0.153869	0.106435
103.5	0.146867	0.115664
103.6	0.138561	0.122639
103.7	0.129258	0.127178
103.8	0.119235	0.129136
103.9	0.108757	0.128436
104	0.0980861	0.125072
104.1	0.0874302	0.119106
104.2	0.0769818	0.110661
104.3	0.0668684	0.0998855
104.4	0.057199	0.0869684
104.5	0.048015	0.0721526
104.6	0.0393333	0.05568
104.7	0.031145	0.0378032
104.8	0.0233742	0.0188246
104.9	0.0159802	-0.000967026
105	0.00888658	-0.0212786
105.1	0.00207758	-0.0418034
105.2	-0.00450277	-0.0622826
105.3	-0.0109329	-0.0824523
105.4	-0.0172206	-0.102074
105.5	-0.0233598	-0.120929
105.6	-0.0293237	-0.138831
105.7	-0.0351104	-0.155675
105.8	-0.040679	-0.171358
105.9	-0.0459541	-0.185857
106	-0.0508934	-0.199169
106.1	-0.0553844	-0.211365
106.2	-0.0593436	-0.222563
106.3	-0.0626765	-0.232912
106.4	-0.065323	-0.242638
106.5	-0.0672203	-0.251947
106.6	-0.0683482	-0.261054
106.7	-0.0686843	-0.270209
106.8	-0.0682169	-0.279626
106.9	-0.0669594	-0.289506
107	-0.0649354	-0.299985
107.1	-0.0621934	-0.31117
107.2	-0.058804	-0.32312
107.3	-0.0548741	-0.335781
107.4	-0.0505269	-0.349059
107.5	-0.0458351	-0.362757
107.6	-0.040928	-0.376638
107.7	-0.0358783	-0.390447
107.8	-0.0308053	-0.403825
107.9	-0.0258198	-0.416444
108	-0.0209779	-0.427932
108.1	-0.0163784	-0.437939
108.2	-0.0120772	-0.446109
108.3	-0.00816286	-0.45213
108.4	-0.00470221	-0.455753
108.5	-0.00174427	-0.456767
108.6	0.000656486	-0.455055
108.7	0.00244498	-0.45055
108.8	0.00354302	-0.443261
108.9	0.00387061	-0.433279
109	0.00335658	-0.420779
109.1	0.00193071	-0.405962
109.2	-0.000499725	-0.389076
109.3	-0.00399542	-0.370422
109.4	-0.00854754	-0.350307
109.5	-0.0141305	-0.32905
109.6	-0.0206752	-0.306964
109.7	-0.0280551	-0.284356
109.8	-0.0360992	-0.261492
109.9	-0.0445182	-0.238614
110	-0.0530212	-0.215939
110.1	-0.0612205	-0.193633
110.2	-0.0687211	-0.171818
110.3	-0.0750434	-0.150609
110.4	-0.0797569	-0.130039
110.5	-0.0823995	-0.110165
110.6	-0.0825733	-0.0909832
110.7	-0.0799341	-0.0724936
110.8	-0.0742071	-0.0546794
110.9	-0.0652504	-0.0375266
111	-0.0530167	-0.0210464
111.1	-0.0376055	-0.00520039
111.2	-0.0192536	0.00998974
111.3	0.00166023	0.0245047
111.4	0.0246372	0.0383079
111.5	0.0490975	0.0512927
111.6	0.0743619	0.063386
111.7	0.0997014	0.0744648
111.8	0.124412	0.0844593
111.9	0.147757	0.0932152
112	0.169068	0.100577
112.1	0.187779	0.106346
112.2	0.203446	0.110394
112.3	0.215743	0.112575
112.4	0.224506	0.112773
112.5	0.229748	0.1109
112.6	0.231599	0.106921
112.7	0.230362	0.100849
112.8	0.226456	0.0927901
112.9	0.220385	0.0829039
113	0.212721	0.0714247
113.1	0.203992	0.0586841
113.2	0.194756	0.0450652
113.3	0.185551	0.0310082
113.4	0.176834	0.0169809
113.5	0.168978	0.0034492
113.6	0.162226	-0.0091176
113.7	0.156744	-0.0203059
113.8	0.152563	-0.0297458
113.9	0.149618	-0.0371382
114	0.147751	-0.0422547
114.1	0.146705	-0.0449929
114.2	0.146218	-0.0453198
114.3	0.145991	-0.0433266
114.4	0.14575	-0.0391829
114.5	0.14521	-0.0331454
114.6	0.144187	-0.0255468
114.7	0.142483	-0.0167382
114.8	0.139981	-0.00709057
114.9	0.136591	0.00300074
115	0.132305	0.0131886
115.1	0.127179	0.0231569
115.2	0.121294	0.0326385
115.3	0.11482	0.0413871
115.4	0.107896	0.0492718
115.5	0.100673	0.0561879
115.6	0.0933361	0.0620878
115.7	0.0860152	0.0669978
115.8	0.0788738	0.0709686
115.9	0.0720295	0.0740967
116	0.0655974	0.0764809
116.1	0.0596725	0.0782566
116.2	0.0542941	0.0795512
116.3	0.0495558	0.0805049
116.4	0.0455031	0.0812624
116.5	0.0421629	0.0819366
116.6	0.0395354	0.0826352
116.7	0.0376232	0.0834367
116.8	0.0364659	0.0844355
116.9	0.03605	0.0857561
117	0.0364017	0.0874763
117.1	0.0374634	0.0896707
117.2	0.0392237	0.0924251
117.3	0.041618	0.0958261
117.4	0.044553	0.0999758
117.5	0.0479567	0.104943
117.6	0.0517429	0.110816
117.7	0.0558134	0.117695
117.8	0.0600494	0.12562
117.9	0.0643176	0.134637
118	0.0685084	0.144774
118.1	0.0724688	0.156015
118.2	0.0760903	0.168306
118.3	0.0792574	0.181555
118.4	0.0819249	0.195565
118.5	0.0840013	0.210106
118.6	0.0854478	0.224884
118.7	0.086202	0.239544
118.8	0.0862427	0.253642
118.9	0.0856144	0.26672
119	0.0843227	0.278275
119.1	0.0824022	0.287776
119.2	0.0798714	0.29473
119.3	0.076794	0.298643
119.4	0.0732051	0.299058
119.5	0.069124	0.295636
119.6	0.0646	0.288067
119.7	0.0596446	0.276185
119.8	0.0542694	0.25991
119.9	0.0484824	0.239328
120	0.0422769	0.214682
120.1	0.0356562	0.186347
120.2	0.0286176	0.154824
120.3	0.0211357	0.120702
120.4	0.0132256	0.0847063
120.5	0.00489664	0.0475903
120.6	-0.00381958	0.0101428
120.7	-0.0128886	-0.0268135
120.8	-0.0222126	-0.0625246
120.9	-0.0317019	-0.0962615
121	-0.0412031	-0.127409
121.1	-0.0505298	-0.155438
121.2	-0.0595281	-0.179903
121.3	-0.0679959	-0.200526
121.4	-0.0757565	-0.217142
121.5	-0.0825953	-0.22973
121.6	-0.0882922	-0.238351
121.7	-0.0926712	-0.243169
121.8	-0.0955865	-0.244469
121.9	-0.0969491	-0.242613
122	-0.0966855	-0.238054
122.1	-0.0947959	-0.231216
122.2	-0.091328	-0.222548
122.3	-0.0864011	-0.212523
122.4	-0.0801586	-0.201563
122.5	-0.072803	-0.190078
122.6	-0.0646139	-0.178425
122.7	-0.0558281	-0.166936
122.8	-0.0467792	-0.155895
122.9	-0.0377334	-0.145532
123	-0.0290159	-0.136038
123.1	-0.0208718	-0.127588
123.2	-0.0135195	-0.120308
123.3	-0.00717103	-0.114292
123.4	-0.00195611	-0.10961
123.5	0.00200438	-0.106287
123.6	0.00468326	-0.104336
123.7	0.00612211	-0.103746
123.8	0.00641894	-0.104483
123.9	0.00573909	-0.106489
124	0.00424027	-0.109658
124.1	0.0021379	-0.113909
124.2	-0.000317812	-0.119089
124.3	-0.0028652	-0.125037
124.4	-0.00523174	-0.131576
124.5	-0.00715339	-0.138477
124.6	-0.00840735	-0.145505
124.7	-0.00879562	-0.152371
124.8	-0.0081526	-0.158821
124.9	-0.00634563	-0.164621
125	-0.00334895	-0.169507
125.1	0.000856638	-0.173301
125.2	0.00622535	-0.175784
125.3	0.0126431	-0.176804
125.4	0.0199381	-0.176272
125.5	0.0278887	-0.174121
125.6	0.036221	-0.170422
125.7	0.0446186	-0.16526
125.8	0.0527503	-0.158825
125.9	0.0602876	-0.151302
126	0.0668678	-0.142942
126.1	0.0721565	-0.134071
126.2	0.0758247	-0.125016
126.3	0.0775728	-0.116083
126.4	0.0771381	-0.107587
126.5	0.0743319	-0.0998001
126.6	0.0690093	-0.0929625
126.7	0.0611382	-0.0872514
126.8	0.0507228	-0.0827706
126.9	0.037804	-0.0795398
127	0.0225629	-0.0775447
127.1	0.00523186	-0.0766549
127.2	-0.0138465	-0.0766883
127.3	-0.0343267	-0.0774083
127.4	-0.0557301	-0.0785067
127.5	-0.0775993	-0.0796814
127.6	-0.0994415	-0.080616
127.7	-0.120755	-0.0810094
127.8	-0.14107	-0.0805776
127.9	-0.159909	-0.0791266
128	-0.176822	-0.076535
128.1	-0.191455	-0.0727594
128.2	-0.203541	-0.0678537
128.3	-0.212846	-0.061904
128.4	-0.219221	-0.0551126
128.5	-0.222643	-0.047735
128.6	-0.223156	-0.0400751
128.7	-0.220907	-0.0325229
128.8	-0.216119	-0.0254593
128.9	-0.209038	-0.0192664
129	-0.199985	-0.0142813
129.1	-0.189319	-0.0108457
129.2	-0.177388	-0.00921488
129.3	-0.164601	-0.00957274
129.4	-0.151299	-0.0120409
129.5	-0.137837	-0.0166316
129.6	-0.124521	-0.0233362
129.7	-0.111629	-0.0320454
129.8	-0.0993444	-0.0425742
129.9	-0.0878296	-0.0547237
130	-0.0772241	-0.0682473
130.1	-0.0676025	-0.0829079
130.2	-0.0590112	-0.0984454
130.3	-0.0514278	-0.114561
130.4	-0.0448256	-0.131024
130.5	-0.0391227	-0.14757
130.6	-0.0342399	-0.16399
130.7	-0.0300498	-0.180037
130.8	-0.0263928	-0.195484
130.9	-0.0231318	-0.210083
131	-0.0200942	-0.223583
131.1	-0.0171512	-0.235759
131.2	-0.0141126	-0.246343
131.3	-0.010774	-0.255069
131.4	-0.00697398	-0.261668
131.5	-0.00251508	-0.265884
131.6	0.00271344	-0.267507
131.7	0.00882959	-0.266332
131.8	0.0159276	-0.262244
131.9	0.0240762	-0.255166
132	0.0333579	-0.245182
132.1	0.0437783	-0.232403
132.2	0.0553143	-0.217096
[truncated: 5,678 more rows]
