# Supplementary material for: A label-free approach to detect ligand binding to cell surface proteins in real time
Source: eLife journal article supplement (doi:10.7554/elife.34944), 2018-04-26
Supplement: supp [file Fig1d.xlsx]

## Sheet: 16d13005.abf
	Current (pA)
time (ms)	10uM cocaine	30uM cocaine	100uM cocaine	300uM cocaine
0	-0.31308	0.0720075	-0.0197842	-0.151379
0.0996094	-0.313858	0.0882906	-0.0216782	-0.141978
0.200195	-0.313182	0.104386	-0.0255783	-0.130925
0.299805	-0.31093	0.119936	-0.0316783	-0.118475
0.400391	-0.306995	0.134625	-0.0400656	-0.10486
0.5	-0.301328	0.148122	-0.0507554	-0.0904205
0.599609	-0.293902	0.160136	-0.0636307	-0.0754995
0.700195	-0.284754	0.170392	-0.0784794	-0.0604973
0.799805	-0.273983	0.178634	-0.0949981	-0.0457942
0.900391	-0.261712	0.184663	-0.112747	-0.0317672
1	-0.248128	0.188296	-0.131252	-0.018805
1.09961	-0.233447	0.189438	-0.149922	-0.00728541
1.2002	-0.217902	0.188015	-0.168161	0.0024575
1.2998	-0.201767	0.18405	-0.18536	0.0101354
1.40039	-0.185334	0.177561	-0.200899	0.0155101
1.5	-0.168907	0.168661	-0.214237	0.0184003
1.59961	-0.152784	0.157482	-0.224843	0.0186854
1.7002	-0.137304	0.144221	-0.232331	0.0163066
1.7998	-0.122738	0.129074	-0.236366	0.0112679
1.90039	-0.109373	0.112306	-0.236781	0.00364085
2	-0.0974057	0.0941844	-0.233532	-0.0064572
2.09961	-0.0870455	0.074988	-0.226732	-0.0188472
2.2002	-0.0784041	0.0550273	-0.216608	-0.0333174
2.2998	-0.0715892	0.0346034	-0.203519	-0.0495748
2.40039	-0.0666244	0.0140242	-0.187967	-0.067357
2.5	-0.0635171	-0.00640395	-0.170531	-0.0863207
2.59961	-0.0621907	-0.0263969	-0.151877	-0.10619
2.7002	-0.0624982	-0.0456913	-0.13267	-0.126632
2.7998	-0.0642761	-0.0639829	-0.113639	-0.147346
2.90039	-0.0673192	-0.081035	-0.0954702	-0.168025
3	-0.0713631	-0.0965833	-0.0788258	-0.188436
3.09961	-0.0761718	-0.110447	-0.0642554	-0.208323
3.2002	-0.08143	-0.122404	-0.0522498	-0.2275
3.2998	-0.0868994	-0.132274	-0.0431684	-0.245762
3.40039	-0.0922994	-0.139922	-0.0372156	-0.262988
3.5	-0.097398	-0.145239	-0.0345121	-0.279043
3.59961	-0.101976	-0.148149	-0.0350068	-0.293806
3.7002	-0.105818	-0.14861	-0.0385545	-0.307196
3.7998	-0.108776	-0.146628	-0.0448653	-0.319142
3.90039	-0.110698	-0.142244	-0.0535759	-0.329576
4	-0.111526	-0.135559	-0.0642612	-0.33844
4.09961	-0.111208	-0.126713	-0.0764537	-0.345664
4.2002	-0.109722	-0.115879	-0.0896543	-0.35119
4.2998	-0.107099	-0.10325	-0.103353	-0.354937
4.40039	-0.103354	-0.0890968	-0.117079	-0.356882
4.5	-0.0985174	-0.073696	-0.130365	-0.356936
4.59961	-0.0926363	-0.0573553	-0.142837	-0.3551
4.7002	-0.0857338	-0.0404245	-0.154176	-0.351303
4.7998	-0.0778738	-0.0232385	-0.164128	-0.345569
4.90039	-0.0690927	-0.00614671	-0.17253	-0.337896
5	-0.0594402	0.0105311	-0.179262	-0.328362
5.09961	-0.0489603	0.0264604	-0.184284	-0.317058
5.2002	-0.037715	0.0413649	-0.187633	-0.30411
5.2998	-0.0257635	0.0549787	-0.189356	-0.289681
5.40039	-0.0131383	0.0670779	-0.189568	-0.27397
5.5	6.61211e-05	0.0775097	-0.188381	-0.257219
5.59961	0.0137879	0.0861602	-0.185953	-0.239694
5.7002	0.0279282	0.0930081	-0.182426	-0.221705
5.7998	0.0423802	0.0980549	-0.177932	-0.203554
5.90039	0.0570259	0.101372	-0.17259	-0.185544
6	0.0717193	0.103064	-0.166511	-0.168009
6.09961	0.0863172	0.103301	-0.159828	-0.151248
6.2002	0.100702	0.102255	-0.152634	-0.135597
6.2998	0.114753	0.100171	-0.14502	-0.121298
6.40039	0.12833	0.0972807	-0.137038	-0.108617
6.5	0.141311	0.0938609	-0.128771	-0.0977404
6.59961	0.153582	0.0901165	-0.120298	-0.0888209
6.7002	0.165058	0.0863331	-0.11171	-0.0819675
6.7998	0.175632	0.0826771	-0.103064	-0.0772189
6.90039	0.185264	0.0793331	-0.0944546	-0.0745915
7	0.193892	0.0764227	-0.0859614	-0.074032
7.09961	0.201468	0.0740597	-0.0777037	-0.0754377
7.2002	0.207958	0.0722911	-0.0697689	-0.0786608
7.2998	0.213305	0.0711332	-0.0622543	-0.0835408
7.40039	0.217479	0.0705602	-0.0552718	-0.0898764
7.5	0.220408	0.0705041	-0.0488778	-0.0974365
7.59961	0.222124	0.0709149	-0.0431378	-0.105987
7.7002	0.222602	0.0716762	-0.0380911	-0.115253
7.7998	0.221886	0.0726641	-0.033738	-0.124999
7.90039	0.219954	0.0737554	-0.0301017	-0.134953
8	0.216866	0.0748051	-0.0271211	-0.144884
8.09961	0.212675	0.0757254	-0.0247449	-0.154554
8.2002	0.207493	0.0764078	-0.0228878	-0.163743
8.2998	0.201465	0.0767699	-0.0214246	-0.172251
8.40039	0.194761	0.0766896	-0.0201927	-0.1799
8.5	0.18757	0.0761064	-0.0190289	-0.186545
8.59961	0.18009	0.0749083	-0.0177938	-0.192059
8.7002	0.172551	0.0730676	-0.0163227	-0.196353
8.7998	0.165178	0.0705118	-0.0144936	-0.19937
8.90039	0.158238	0.067219	-0.0122006	-0.201075
9	0.151914	0.0631348	-0.00933912	-0.201491
9.09961	0.146409	0.0582018	-0.00589099	-0.20065
9.2002	0.141864	0.0523707	-0.00182694	-0.198613
9.2998	0.138426	0.0455953	0.002833	-0.1955
9.40039	0.136154	0.037862	0.00801742	-0.191413
9.5	0.135091	0.0291519	0.013641	-0.186498
9.59961	0.135227	0.0195139	0.0195343	-0.180901
9.7002	0.136483	0.00896802	0.0255478	-0.174822
9.7998	0.138732	-0.00241496	0.0314848	-0.16841
9.90039	0.141818	-0.0145396	0.0371883	-0.161819
10	0.14551	-0.0272401	0.042485	-0.155164
10.0996	0.149574	-0.0403543	0.0472152	-0.148504
10.2002	0.153758	-0.0536515	0.0512664	-0.141934
10.2998	0.157761	-0.0668662	0.0545169	-0.135483
10.4004	0.161291	-0.0797271	0.0569585	-0.12914
10.5	0.164069	-0.0918907	0.058549	-0.122899
10.5996	0.165821	-0.103091	0.0593623	-0.116705
10.7002	0.166323	-0.112952	0.0594498	-0.110488
10.7998	0.165301	-0.121217	0.0589341	-0.104171
10.9004	0.162588	-0.127562	0.057938	-0.097671
11	0.158034	-0.131749	0.0565838	-0.090945
11.0996	0.151571	-0.133593	0.0550126	-0.0839884
11.2002	0.143155	-0.132952	0.0533245	-0.0767771
11.2998	0.132814	-0.129731	0.0516139	-0.0693315
11.4004	0.120637	-0.12395	0.0499203	-0.0617076
11.5	0.106751	-0.115624	0.0482175	-0.0540275
11.5996	0.0913099	-0.104913	0.0464662	-0.0463879
11.7002	0.074543	-0.0919711	0.0445325	-0.0389743
11.7998	0.056676	-0.0770295	0.042294	-0.0319055
11.9004	0.0380117	-0.0603618	0.0395445	-0.0253415
12	0.0188056	-0.0422677	0.0361039	-0.019419
12.0996	-0.00061445	-0.0230602	0.0317251	-0.0142952
12.2002	-0.0199519	-0.00307477	0.0262133	-0.0100519
12.2998	-0.0389261	0.0173195	0.0193447	-0.00675893
12.4004	-0.0572944	0.037812	0.0109887	-0.00444472
12.5	-0.0748316	0.0580569	0.00102893	-0.00306967
12.5996	-0.0913402	0.0777445	-0.0106048	-0.00256839
12.7002	-0.106619	0.0965465	-0.0239136	-0.00285941
12.7998	-0.120525	0.11418	-0.0387998	-0.00380293
12.9004	-0.132902	0.130375	-0.0551361	-0.00526761
13	-0.143644	0.144884	-0.0727055	-0.00703189
13.0996	-0.152632	0.157458	-0.0912196	-0.00896216
13.2002	-0.159756	0.167862	-0.110365	-0.0109118
13.2998	-0.164964	0.175868	-0.129773	-0.0127985
13.4004	-0.168162	0.181277	-0.149057	-0.0145573
13.5	-0.169305	0.18392	-0.167788	-0.0161734
13.5996	-0.168331	0.183652	-0.185549	-0.0176797
13.7002	-0.165182	0.180385	-0.201961	-0.019161
13.7998	-0.159852	0.174031	-0.216633	-0.0207827
13.9004	-0.152283	0.164605	-0.229231	-0.0227128
14	-0.142522	0.15211	-0.239459	-0.0251637
14.0996	-0.130561	0.136679	-0.247083	-0.0283841
14.2002	-0.116475	0.118475	-0.251908	-0.0325736
14.2998	-0.100385	0.0977575	-0.253852	-0.0379594
14.4004	-0.0824097	0.0748103	-0.252871	-0.0447099
14.5	-0.0627246	0.0500227	-0.248995	-0.0529615
14.5996	-0.0415658	0.0238051	-0.242333	-0.0628041
14.7002	-0.0191995	-0.00336665	-0.233053	-0.0742149
14.7998	0.00405718	-0.0309884	-0.221418	-0.0871407
14.9004	0.0278614	-0.058538	-0.207715	-0.101432
15	0.0518247	-0.0855066	-0.192337	-0.116888
15.0996	0.0755453	-0.11141	-0.17567	-0.133227
15.2002	0.0986192	-0.135765	-0.158172	-0.150143
15.2998	0.120595	-0.158212	-0.140294	-0.167263
15.4004	0.141083	-0.178387	-0.122537	-0.184227
15.5	0.159639	-0.196068	-0.105331	-0.200665
15.5996	0.175869	-0.211043	-0.0891449	-0.216218
15.7002	0.189401	-0.223279	-0.0743633	-0.230579
15.7998	0.199908	-0.232783	-0.0613719	-0.243453
15.9004	0.207132	-0.239627	-0.0504646	-0.254636
16	0.210841	-0.243974	-0.0419058	-0.263934
16.0996	0.210913	-0.246032	-0.0358343	-0.271243
16.2002	0.207254	-0.246057	-0.0323747	-0.276542
16.2998	0.199855	-0.244328	-0.0315014	-0.279828
16.4004	0.188767	-0.241126	-0.0331956	-0.281193
16.5	0.174146	-0.236703	-0.0372973	-0.280723
16.5996	0.15622	-0.23132	-0.0436138	-0.278591
16.7002	0.135273	-0.225174	-0.0518739	-0.274956
16.7998	0.111708	-0.218448	-0.061774	-0.270028
16.9004	0.0859409	-0.211283	-0.0729714	-0.26398
17	0.0584866	-0.203772	-0.0851165	-0.257029
17.0996	0.0298704	-0.195969	-0.0978513	-0.249346
17.2002	0.000669061	-0.187951	-0.110873	-0.241099
17.2998	-0.0285359	-0.179738	-0.123816	-0.232453
17.4004	-0.0571253	-0.171378	-0.136438	-0.223542
17.5	-0.0845236	-0.16291	-0.148478	-0.214486
17.5996	-0.11017	-0.154447	-0.159765	-0.205358
17.7002	-0.133516	-0.146122	-0.170131	-0.196208
17.7998	-0.154076	-0.138093	-0.179502	-0.187089
17.9004	-0.171424	-0.130542	-0.1878	-0.178018
18	-0.185214	-0.123706	-0.195027	-0.169017
18.0996	-0.1952	-0.117809	-0.201184	-0.160087
18.2002	-0.201179	-0.11313	-0.206287	-0.151206
18.2998	-0.203096	-0.109923	-0.210384	-0.142342
18.4004	-0.200951	-0.108423	-0.21353	-0.133453
18.5	-0.194879	-0.108832	-0.215728	-0.124538
18.5996	-0.18509	-0.111276	-0.217025	-0.115556
18.7002	-0.17189	-0.115823	-0.217375	-0.106491
18.7998	-0.155632	-0.122468	-0.216761	-0.0973361
18.9004	-0.136796	-0.131111	-0.215127	-0.0880923
19	-0.115911	-0.141591	-0.212426	-0.0787531
19.0996	-0.0935774	-0.153621	-0.208586	-0.0693384
19.2002	-0.0703894	-0.166876	-0.203533	-0.0599
19.2998	-0.0470066	-0.180973	-0.19722	-0.0504699
19.4004	-0.0240496	-0.195468	-0.189601	-0.0410874
19.5	-0.00215859	-0.209933	-0.180664	-0.0318006
19.5996	0.0180927	-0.223931	-0.170422	-0.0226783
19.7002	0.0361346	-0.237052	-0.158974	-0.0137732
19.7998	0.0514881	-0.248917	-0.146399	-0.00516315
19.9004	0.0637359	-0.259213	-0.132871	0.00310969
20	0.0725844	-0.26771	-0.118558	0.0109896
20.0996	0.0778192	-0.274269	-0.103702	0.0184523
20.2002	0.0793785	-0.278838	-0.0885508	0.0253967
20.2998	0.0773077	-0.281408	-0.0733415	0.031841
20.4004	0.0718061	-0.282113	-0.0583471	0.0377199
20.5	0.063116	-0.281084	-0.0438003	0.0430274
20.5996	0.0516791	-0.278555	-0.0299533	0.0477264
20.7002	0.0379774	-0.274775	-0.0170076	0.05179
20.7998	0.0226	-0.270014	-0.00508891	0.0552035
20.9004	0.0061542	-0.26457	0.00565807	0.0579555
21	-0.0106609	-0.258728	0.015197	0.0600389
21.0996	-0.0271742	-0.252759	0.0234707	0.0615048
21.2002	-0.0427126	-0.246868	0.0305084	0.0623938
21.2998	-0.0566608	-0.24124	0.0363249	0.0627613
21.4004	-0.0684454	-0.235999	0.0409852	0.062677
21.5	-0.0776071	-0.231244	0.0445824	0.0622448
21.5996	-0.0837759	-0.227015	0.0471926	0.0615625
21.7002	-0.086706	-0.223338	0.0489386	0.0607572
21.7998	-0.0862687	-0.2202	0.0498767	0.0599861
21.9004	-0.0824836	-0.217568	0.0501001	0.0593857
22	-0.0754593	-0.215393	0.0496739	0.0591169
22.0996	-0.0654454	-0.213615	0.0486755	0.0593095
22.2002	-0.0527858	-0.212181	0.0471417	0.0601083
22.2998	-0.0378975	-0.211037	0.0451299	0.0615968
22.4004	-0.0212388	-0.210151	0.0426794	0.0638548
22.5	-0.00332182	-0.209474	0.0398189	0.066917
22.5996	0.0153529	-0.209036	0.0366181	0.0708181
22.7002	0.0342783	-0.208801	0.0330972	0.0754965
22.7998	0.0529729	-0.208824	0.029334	0.0808605
22.9004	0.0709985	-0.209115	0.025325	0.0867546
23	0.0879816	-0.209717	0.0211472	0.0929993
23.0996	0.10362	-0.210694	0.0168469	0.0993655
23.2002	0.117689	-0.212072	0.0124607	0.105597
23.2998	0.129995	-0.213885	0.00801621	0.111403
23.4004	0.140461	-0.216167	0.0035121	0.116514
23.5	0.149053	-0.218944	-0.00105735	0.120592
23.5996	0.15578	-0.222212	-0.00572423	0.12337
23.7002	0.160735	-0.22592	-0.0105244	0.124565
23.7998	0.163984	-0.229998	-0.0155332	0.123956
23.9004	0.165652	-0.234382	-0.0207796	0.121333
24	0.165828	-0.238953	-0.0263447	0.116558
24.0996	0.164656	-0.243574	-0.0322715	0.109563
24.2002	0.162215	-0.24803	-0.038581	0.100357
24.2998	0.158607	-0.252062	-0.0452775	0.089014
24.4004	0.15389	-0.255421	-0.0522975	0.075713
24.5	0.14811	-0.257783	-0.0595652	0.0606605
24.5996	0.141337	-0.258882	-0.0669493	0.0442012
24.7002	0.133564	-0.258393	-0.0742527	0.0266445
24.7998	0.124813	-0.256012	-0.0812413	0.0084609
24.9004	0.115042	-0.251439	-0.0876619	-0.00998245
25	0.104267	-0.244464	-0.0931968	-0.0282128
25.0996	0.0924549	-0.234901	-0.0975666	-0.0457564
25.2002	0.0796148	-0.222618	-0.100437	-0.0622
25.2998	0.0657071	-0.207577	-0.101554	-0.0771314
25.4004	0.050789	-0.189829	-0.100636	-0.0902335
25.5	0.0348538	-0.169507	-0.0975113	-0.101201
25.5996	0.0179577	-0.146837	-0.0920237	-0.109879
25.7002	0.000116793	-0.122132	-0.0841301	-0.116117
25.7998	-0.018613	-0.0957451	-0.0738335	-0.119901
25.9004	-0.0381951	-0.0681852	-0.0612454	-0.121271
26	-0.0585553	-0.0398982	-0.0465575	-0.120352
26.0996	-0.0795942	-0.0114247	-0.0300174	-0.117338
26.2002	-0.101248	0.0167573	-0.0119133	-0.112467
26.2998	-0.123362	0.044128	0.00739873	-0.106049
26.4004	-0.14582	0.0702664	0.0275403	-0.0983765
26.5	-0.168454	0.0947407	0.0480653	-0.0898248
26.5996	-0.191119	0.117271	0.0685605	-0.0807219
26.7002	-0.213586	0.137627	0.0886002	-0.0714426
26.7998	-0.235668	0.15568	0.1078	-0.062311
26.9004	-0.257125	0.171385	0.125835	-0.053651
27	-0.277736	0.184794	0.142368	-0.0457608
27.0996	-0.297219	0.196008	0.157141	-0.0388654
27.2002	-0.315328	0.205216	0.169931	-0.0331962
27.2998	-0.331768	0.212669	0.180587	-0.0289193
27.4004	-0.346321	0.218627	0.188979	-0.0261428
27.5	-0.358715	0.223358	0.194992	-0.0249275
27.5996	-0.368749	0.227163	0.198604	-0.0252466
27.7002	-0.376215	0.23027	0.199819	-0.0270609
27.7998	-0.380974	0.232908	0.198625	-0.03023
27.9004	-0.382902	0.235219	0.195098	-0.0346065
28	-0.381922	0.237324	0.189289	-0.0399804
28.0996	-0.378024	0.23924	0.181306	-0.0460938
28.2002	-0.371233	0.24098	0.171246	-0.0526604
28.2998	-0.361631	0.242456	0.159222	-0.059372
28.4004	-0.349317	0.243579	0.145386	-0.0659614
28.5	-0.334414	0.244194	0.129909	-0.0721019
28.5996	-0.317105	0.24415	0.112936	-0.0775501
28.7002	-0.297595	0.243288	0.0946715	-0.082073
28.7998	-0.276082	0.241445	0.0753106	-0.085466
28.9004	-0.252798	0.238457	0.0550497	-0.087583
29	-0.227943	0.234242	0.0340728	-0.088331
29.0996	-0.201735	0.228704	0.0126406	-0.0876982
29.2002	-0.17437	0.221776	-0.00902766	-0.0857249
29.2998	-0.146071	0.213422	-0.030693	-0.0824975
29.4004	-0.117011	0.203647	-0.052105	-0.0781596
29.5	-0.0874301	0.192496	-0.0730589	-0.0728986
29.5996	-0.0574892	0.180042	-0.093296	-0.0669178
29.7002	-0.0274499	0.16637	-0.112609	-0.060458
29.7998	0.00247698	0.151574	-0.130752	-0.0537744
29.9004	0.032052	0.135716	-0.147546	-0.0471296
30	0.0609862	0.118885	-0.162788	-0.04079
30.0996	0.0889763	0.101151	-0.176298	-0.0349957
30.2002	0.115687	0.0825743	-0.187924	-0.0299755
30.2998	0.140756	0.0631909	-0.197542	-0.0259057
30.4004	0.163844	0.0431001	-0.20508	-0.0229525
30.5	0.18457	0.022319	-0.210465	-0.0212754
30.5996	0.202571	0.000982865	-0.213695	-0.0209529
30.7002	0.217526	-0.0208486	-0.214775	-0.0220541
30.7998	0.229184	-0.0429753	-0.213774	-0.0245578
30.9004	0.237306	-0.0652516	-0.210786	-0.0284224
31	0.241741	-0.0874243	-0.205965	-0.0335743
31.0996	0.242453	-0.109274	-0.199503	-0.0398401
31.2002	0.239462	-0.130485	-0.191594	-0.0470729
31.2998	0.232902	-0.150726	-0.182479	-0.0550253
31.4004	0.223017	-0.169632	-0.172365	-0.0634748
31.5	0.210189	-0.186822	-0.161524	-0.0721482
31.5996	0.19486	-0.201921	-0.150201	-0.080752
31.7002	0.17753	-0.214536	-0.138614	-0.0889972
31.7998	0.158786	-0.224342	-0.126994	-0.0966388
31.9004	0.139246	-0.23102	-0.11552	-0.103388
32	0.119576	-0.234358	-0.104417	-0.109059
32.0996	0.100389	-0.234173	-0.0938195	-0.113455
32.2002	0.0823296	-0.230405	-0.0838471	-0.116478
32.2998	0.0659571	-0.223087	-0.0745892	-0.118079
32.4004	0.0517816	-0.212331	-0.0660876	-0.118278
32.5	0.0401826	-0.198364	-0.0583884	-0.117151
32.5996	0.0315007	-0.181516	-0.0514922	-0.11481
32.7002	0.0259332	-0.162198	-0.0453683	-0.111439
32.7998	0.0235707	-0.140961	-0.0399433	-0.107264
32.9004	0.0243945	-0.118389	-0.0351398	-0.102542
33	0.0282892	-0.0951361	-0.0308622	-0.0975788
33.0996	0.0350176	-0.0718781	-0.0270103	-0.0926672
33.2002	0.0442693	-0.0493222	-0.0234778	-0.0881069
33.2998	0.0556293	-0.028167	-0.0201601	-0.0841646
33.4004	0.0686325	-0.0090905	-0.0169778	-0.0811152
33.5	0.0827688	0.00728661	-0.0138788	-0.0791421
33.5996	0.0975161	0.0204324	-0.0108272	-0.0784358
33.7002	0.112378	0.0298933	-0.00781989	-0.0790968
33.7998	0.126887	0.0352907	-0.00490565	-0.0812297
33.9004	0.140579	0.0364137	-0.00211281	-0.0848483
34	0.153075	0.0331393	0.000404259	-0.089926
34.0996	0.164013	0.0254832	0.00253385	-0.0963961
34.2002	0.173191	0.013581	0.00408896	-0.104174
34.2998	0.180418	-0.00228906	0.00490732	-0.113117
34.4004	0.185647	-0.0217877	0.00482598	-0.123108
34.5	0.18886	-0.0444372	0.00368174	-0.134003
34.5996	0.190153	-0.0697338	0.00134923	-0.145645
34.7002	0.189678	-0.0970814	-0.00224014	-0.157855
34.7998	0.187645	-0.125888	-0.00714172	-0.170483
34.9004	0.184289	-0.155499	-0.0133292	-0.183341
35	0.179876	-0.185299	-0.0207243	-0.196275
35.0996	0.174655	-0.214649	-0.0291913	-0.209127
35.2002	0.168863	-0.242993	-0.0384902	-0.221678
35.2998	0.162737	-0.269812	-0.0483784	-0.233758
35.4004	0.156462	-0.294623	-0.0585665	-0.245145
35.5	0.1502	-0.31702	-0.0687205	-0.255617
35.5996	0.144053	-0.336655	-0.0785216	-0.264956
35.7002	0.138104	-0.353229	-0.0876817	-0.272898
35.7998	0.132363	-0.366494	-0.0959318	-0.279222
35.9004	0.126815	-0.376266	-0.103049	-0.283684
36	0.121423	-0.382415	-0.108843	-0.28609
36.0996	0.116116	-0.384852	-0.113198	-0.286232
36.2002	0.110862	-0.383574	-0.116056	-0.283983
36.2998	0.105571	-0.37863	-0.117459	-0.27923
36.4004	0.100188	-0.370048	-0.117479	-0.271966
36.5	0.0946674	-0.357984	-0.116301	-0.262223
36.5996	0.0890171	-0.342584	-0.114107	-0.250112
36.7002	0.0832642	-0.324132	-0.111143	-0.235834
36.7998	0.0774658	-0.3029	-0.107632	-0.219615
36.9004	0.0716835	-0.279256	-0.103831	-0.201764
37	0.066039	-0.253598	-0.0999217	-0.182606
37.0996	0.0606378	-0.226376	-0.0961002	-0.162504
37.2002	0.0555892	-0.198097	-0.0924829	-0.141791
37.2998	0.0510159	-0.169302	-0.0891454	-0.120835
37.4004	0.0470216	-0.140533	-0.0860771	-0.0999463
37.5	0.0436917	-0.112365	-0.0832215	-0.0794149
37.5996	0.0410839	-0.0853541	-0.0804429	-0.0594913
37.7002	0.0392236	-0.060055	-0.0775864	-0.040342
37.7998	0.0380863	-0.0369477	-0.0744251	-0.0221213
37.9004	0.03761	-0.0164658	-0.0707342	-0.00490637
38	0.0376832	0.00103264	-0.0662675	0.011246
38.0996	0.0381837	0.0152612	-0.0607955	0.0263035
38.2002	0.0389526	0.026005	-0.054106	0.040253
38.2998	0.0398345	0.03318	-0.0460658	0.0530573
38.4004	0.0406418	0.0367724	-0.0365466	0.0647141
38.5	0.0412163	0.0368681	-0.0255788	0.0751615
38.5996	0.0413694	0.0336259	-0.0132275	0.0843373
38.7002	0.0410291	0.0272694	0.00033103	0.0921462
38.7998	0.0400586	0.0181008	0.0148559	0.0984721
38.9004	0.0383945	0.00646965	0.029997	0.103158
39	0.0360422	-0.00723471	0.0453576	0.106051
39.0996	0.0330414	-0.022592	0.0604969	0.106987
39.2002	0.0294596	-0.039201	0.0749197	0.105814
39.2998	0.0253854	-0.0566355	0.0881493	0.102388
39.4004	0.0209531	-0.0745076	0.0996864	0.0966099
39.5	0.0162754	-0.0924599	0.10911	0.0884091
39.5996	0.0115128	-0.110182	0.116026	0.0777856
39.7002	0.00683902	-0.127376	0.120155	0.064787
39.7998	0.00239491	-0.14378	0.121262	0.0494834
39.9004	-0.00167913	-0.15918	0.119242	0.0320306
40	-0.00529348	-0.173388	0.114089	0.012617
40.0996	-0.00835387	-0.186254	0.10588	-0.00853386
40.2002	-0.0108062	-0.19763	0.0948043	-0.0311661
40.2998	-0.0126191	-0.207432	0.0811082	-0.0549982
40.4004	-0.0137823	-0.215555	0.0651554	-0.079741
40.5	-0.0143032	-0.221918	0.0472852	-0.105109
40.5996	-0.0142418	-0.226493	0.0279274	-0.130817
40.7002	-0.0136268	-0.229218	0.00746667	-0.156581
40.7998	-0.0125442	-0.230082	-0.0136746	-0.182107
40.9004	-0.0111074	-0.229056	-0.0351336	-0.20713
41	-0.00945259	-0.226164	-0.056565	-0.231397
41.0996	-0.00772417	-0.221443	-0.0776824	-0.254657
41.2002	-0.00608851	-0.21496	-0.0982511	-0.276678
41.2998	-0.00468062	-0.206809	-0.118108	-0.297259
41.4004	-0.00368117	-0.197122	-0.137151	-0.316159
41.5	-0.00323327	-0.186068	-0.155306	-0.333187
41.5996	-0.00349062	-0.173833	-0.172565	-0.348151
41.7002	-0.00459721	-0.160641	-0.188964	-0.360887
41.7998	-0.00670716	-0.146699	-0.204541	-0.371198
41.9004	-0.00990323	-0.132262	-0.219377	-0.378968
42	-0.0142183	-0.117602	-0.233544	-0.384046
42.0996	-0.0196289	-0.10298	-0.247117	-0.386365
42.2002	-0.0261143	-0.0886429	-0.26016	-0.385813
42.2998	-0.033514	-0.0748266	-0.272699	-0.382407
42.4004	-0.0416821	-0.061726	-0.284755	-0.376114
42.5	-0.0503709	-0.0495588	-0.296348	-0.36701
42.5996	-0.0593326	-0.0384412	-0.307439	-0.355169
42.7002	-0.0682212	-0.0285391	-0.317998	-0.340758
42.7998	-0.0767185	-0.01994	-0.327983	-0.32394
42.9004	-0.0844873	-0.0127501	-0.337323	-0.304966
43	-0.0911848	-0.00701318	-0.345945	-0.284089
43.0996	-0.0964836	-0.00278119	-0.353767	-0.261639
43.2002	-0.100107	-6.6955e-05	-0.360715	-0.237936
43.2998	-0.101829	0.00110056	-0.366734	-0.213357
43.4004	-0.10149	0.000736303	-0.371771	-0.188283
43.5	-0.0989952	-0.00120352	-0.375787	-0.163119
43.5996	-0.0943414	-0.00471892	-0.37877	-0.138287
43.7002	-0.0875857	-0.00985706	-0.380683	-0.114207
43.7998	-0.0788666	-0.0166386	-0.381527	-0.0912643
43.9004	-0.068395	-0.0250834	-0.381313	-0.0698619
44	-0.0564347	-0.0352005	-0.38007	-0.0503339
44.0996	-0.0432966	-0.0470042	-0.377821	-0.0330202
44.2002	-0.0293319	-0.0604438	-0.374606	-0.0181831
44.2998	-0.0149064	-0.0754635	-0.370462	-0.00604098
44.4004	-0.000368379	-0.0920018	-0.365405	0.00328752
44.5	0.0139288	-0.109952	-0.359447	0.00970283
44.5996	0.0276375	-0.129161	-0.352606	0.0132159
44.7002	0.0404333	-0.149463	-0.344908	0.0138919
44.7998	0.0520238	-0.170627	-0.336341	0.0118493
44.9004	0.0621648	-0.192391	-0.326892	0.00730136
45	0.0706561	-0.214489	-0.316583	0.000473448
45.0996	0.0773155	-0.236601	-0.3054	-0.00831999
45.2002	0.0820122	-0.258412	-0.293376	-0.0187607
45.2998	0.0846199	-0.279592	-0.280504	-0.0305064
45.4004	0.0850643	-0.299818	-0.266851	-0.0431816
45.5	0.0833009	-0.318781	-0.252472	-0.0564525
45.5996	0.0792655	-0.336178	-0.23748	-0.0699896
45.7002	0.072981	-0.351713	-0.221987	-0.0834784
45.7998	0.0644019	-0.365139	-0.206168	-0.0966228
45.9004	0.0535641	-0.376214	-0.190213	-0.109206
46	0.0404718	-0.384785	-0.174352	-0.121015
46.0996	0.0252017	-0.390698	-0.158843	-0.131928
46.2002	0.00781768	-0.393834	-0.143932	-0.141797
46.2998	-0.0116097	-0.394156	-0.129901	-0.150554
46.4004	-0.0329285	-0.391662	-0.117004	-0.158164
46.5	-0.0560044	-0.386366	-0.105467	-0.164581
46.5996	-0.0806333	-0.37835	-0.0954915	-0.169855
46.7002	-0.106594	-0.367682	-0.0872324	-0.174007
46.7998	-0.133641	-0.354552	-0.0808035	-0.177143
46.9004	-0.161466	-0.339108	-0.0762662	-0.179329
47	-0.189761	-0.321587	-0.0736215	-0.180679
47.0996	-0.218158	-0.302236	-0.0728238	-0.181326
47.2002	-0.246261	-0.281323	-0.0737628	-0.181422
47.2998	-0.273672	-0.259147	-0.0763225	-0.181104
47.4004	-0.299949	-0.235998	-0.080284	-0.180576
47.5	-0.324649	-0.212167	-0.0854639	-0.180009
47.5996	-0.347344	-0.18796	-0.0916138	-0.179603
47.7002	-0.367577	-0.163631	-0.0985159	-0.179558
47.7998	-0.38495	-0.13947	-0.105928	-0.180003
47.9004	-0.399042	-0.115709	-0.113621	-0.181107
48	-0.409537	-0.0925659	-0.121385	-0.18297
48.0996	-0.416139	-0.0702215	-0.129017	-0.185645
48.2002	-0.418666	-0.0488646	-0.13634	-0.189161
48.2998	-0.417016	-0.0285903	-0.143207	-0.193469
48.4004	-0.411175	-0.00950905	-0.149464	-0.198479
48.5	-0.401222	0.00832327	-0.154966	-0.204024
48.5996	-0.387364	0.0248304	-0.159597	-0.209871
48.7002	-0.369877	0.0399834	-0.163264	-0.21575
48.7998	-0.349172	0.0537256	-0.16588	-0.221358
48.9004	-0.325701	0.066045	-0.167371	-0.226338
49	-0.299988	0.0768983	-0.167688	-0.230351
49.0996	-0.272621	0.0862489	-0.166814	-0.233039
49.2002	-0.244203	0.0940427	-0.164793	-0.234078
49.2998	-0.215364	0.100213	-0.161714	-0.233165
49.4004	-0.186674	0.104697	-0.157698	-0.230104
49.5	-0.158667	0.107435	-0.152905	-0.224715
49.5996	-0.131778	0.108336	-0.147588	-0.216899
49.7002	-0.106352	0.107366	-0.141963	-0.206683
49.7998	-0.082652	0.104475	-0.136359	-0.194132
49.9004	-0.0608337	0.0996482	-0.131085	-0.179435
50	-0.0409492	0.0928965	-0.126486	-0.162855
50.0996	-0.0229573	0.0842229	-0.122861	-0.144721
50.2002	-0.00669568	0.0737067	-0.120484	-0.125408
50.2998	0.0080508	0.0614598	-0.119595	-0.10536
50.4004	0.0215754	0.0475834	-0.120307	-0.0849975
50.5	0.0341571	0.0322421	-0.122717	-0.0647916
50.5996	0.0461288	0.0156075	-0.126768	-0.045179
50.7002	0.0577365	-0.00208071	-0.132358	-0.0265959
50.7998	0.0693031	-0.0205999	-0.139275	-0.00939417
50.9004	0.0809978	-0.039701	-0.147244	0.00610071
51	0.0930181	-0.0591536	-0.15594	0.0196498
51.0996	0.105409	-0.0786707	-0.164965	0.0310797
51.2002	0.11821	-0.0980105	-0.17391	0.0403133
51.2998	0.131338	-0.116902	-0.182358	0.0473709
51.4004	0.144706	-0.135107	-0.189926	0.0523086
51.5	0.158124	-0.152369	-0.19629	0.0552973
51.5996	0.171352	-0.168427	-0.201211	0.056538
51.7002	0.184163	-0.183054	-0.204536	0.0563009
51.7998	0.196297	-0.196	-0.206188	0.0548841
51.9004	0.20751	-0.207069	-0.20615	0.0526212
52	0.217546	-0.216033	-0.204521	0.0498002
52.0996	0.226212	-0.222708	-0.201427	0.0467701
52.2002	0.233319	-0.226928	-0.197111	0.0437832
52.2998	0.238738	-0.228548	-0.191792	0.0410887
52.4004	0.242357	-0.227442	-0.185763	0.0388392
52.5	0.24414	-0.223531	-0.17926	0.0371459
52.5996	0.244082	-0.216755	-0.172572	0.0360478
52.7002	0.242247	-0.207116	-0.165886	0.0355265
52.7998	0.238695	-0.194663	-0.159443	0.0354799
52.9004	0.233572	-0.179513	-0.153356	0.0358045
53	0.226991	-0.161831	-0.147744	0.0363349
53.0996	0.219128	-0.141819	-0.14267	0.0368651
53.2002	0.210163	-0.119744	-0.138153	0.0371892
53.2998	0.200302	-0.0958985	-0.134219	0.0371107
53.4004	0.189668	-0.0706247	-0.130844	0.0364815
53.5	0.178455	-0.0443036	-0.127989	0.0351864
53.5996	0.166833	-0.0173511	-0.125641	0.0331422
53.7002	0.154954	0.00979658	-0.123793	0.0303371
53.7998	0.142959	0.0367124	-0.122404	0.0267768
53.9004	0.130956	0.0629969	-0.121461	0.0225916
54	0.119052	0.0882091	-0.120937	0.017918
54.0996	0.107321	0.111988	-0.120832	0.0129903
54.2002	0.0958499	0.133978	-0.121097	0.00801163
54.2998	0.0846693	0.153859	-0.121716	0.00322301
54.4004	0.0738098	0.171399	-0.122595	-0.00115361
54.5	0.0632888	0.186365	-0.123654	-0.00488228
54.5996	0.0531347	0.198638	-0.12476	-0.00777309
54.7002	0.0433934	0.208139	-0.125767	-0.00965447
54.7998	0.0340632	0.214851	-0.126472	-0.0104152
54.9004	0.0252011	0.218804	-0.126718	-0.0100017
55	0.0168386	0.220121	-0.126311	-0.00837021
55.0996	0.00902921	0.21896	-0.125035	-0.00556917
55.2002	0.00184851	0.215557	-0.122749	-0.00167353
55.2998	-0.00466312	0.210121	-0.119287	0.00317977
55.4004	-0.0103936	0.202963	-0.114558	0.00884661
55.5	-0.0152565	0.194382	-0.108519	0.0151751
55.5996	-0.0191347	0.184686	-0.101187	0.0219682
55.7002	-0.0219327	0.174161	-0.0925912	0.0290708
55.7998	-0.0235882	0.163102	-0.0829144	0.0363177
55.9004	-0.0240347	0.151778	-0.0723078	0.0435502
56	-0.0231891	0.140453	-0.0610004	0.0506344
56.0996	-0.0210455	0.129357	-0.0492093	0.0574805
56.2002	-0.0175948	0.118653	-0.0372093	0.0639798
56.2998	-0.0128838	0.108474	-0.0252706	0.0700816
56.4004	-0.00698488	0.098898	-0.0136559	0.0757029
56.5	-1.45203e-05	0.0899988	-0.00259664	0.0808196
56.5996	0.0078884	0.0818043	0.00769484	0.0853949
56.7002	0.0165195	0.0743432	0.017054	0.0893793
56.7998	0.0256435	0.0675639	0.0253433	0.0927755
56.9004	0.0350056	0.0614596	0.032514	0.0955349
57	0.0443261	0.055976	0.0385106	0.0976434
57.0996	0.0533529	0.0510898	0.04332	0.0990739
57.2002	0.0617734	0.0467574	0.0469766	0.0998019
57.2998	0.0693277	0.0429514	0.0495331	0.0997858
57.4004	0.0757114	0.0396307	0.0510393	0.0990148
57.5	0.0806992	0.0367865	0.0515277	0.0974884
57.5996	0.0840186	0.0343748	0.0510328	0.0951917
57.7002	0.0855126	0.0323431	0.0495639	0.0921413
57.7998	0.0850227	0.0306254	0.0471353	0.0883784
57.9004	0.0824799	0.0291323	0.0437418	0.0839568
58	0.0778229	0.0277939	0.0393146	0.0789577
58.0996	0.0710755	0.0265096	0.0338274	0.0734978
58.2002	0.0623154	0.0251338	0.0271911	0.0676791
58.2998	0.0516576	0.0235345	0.0193548	0.0616457
58.4004	0.0393068	0.0215605	0.0102465	0.0555755
58.5	0.0254461	0.0190753	-0.000157296	0.0495953
58.5996	0.0103525	0.0159312	-0.0118788	0.0438476
58.7002	-0.00573468	0.012028	-0.0249002	0.0384976
58.7998	-0.022528	0.00729417	-0.0391211	0.0336629
58.9004	-0.0397907	0.00170468	-0.0544419	0.0294707
59	-0.0572253	-0.00472085	-0.0707081	0.025992
59.0996	-0.0746128	-0.0118892	-0.0877347	0.0232786
59.2002	-0.0917384	-0.019682	-0.105237	0.0213386
59.2998	-0.108446	-0.0279013	-0.122941	0.0201666
59.4004	-0.124622	-0.0362868	-0.140503	0.0197369
59.5	-0.140166	-0.044551	-0.157581	0.0199861
59.5996	-0.155021	-0.0524096	-0.173792	0.0208383
59.7002	-0.169173	-0.0595237	-0.188807	0.0222053
59.7998	-0.182636	-0.0656135	-0.202278	0.023974
59.9004	-0.195409	-0.0703691	-0.213893	0.0260738
60	-0.20752	-0.0735781	-0.223438	0.0283934
60.0996	-0.218985	-0.075017	-0.230636	0.030865
60.2002	-0.229804	-0.0745789	-0.235389	0.0334145
60.2998	-0.23997	-0.0721824	-0.23758	0.035992
60.4004	-0.249404	-0.0678404	-0.237203	0.0385673
60.5	-0.258071	-0.0616054	-0.234344	0.0411002
60.5996	-0.265879	-0.0536573	-0.229115	0.0435796
60.7002	-0.272748	-0.044151	-0.221792	0.0460145
60.7998	-0.278575	-0.0333119	-0.21262	0.0483938
60.9004	-0.283289	-0.0213873	-0.201946	0.0507113
61	-0.286797	-0.00862434	-0.19016	0.0529317
61.0996	-0.289109	0.00467876	-0.177652	0.0550558
61.2002	-0.290181	0.018309	-0.164877	0.0570376
61.2998	-0.290103	0.0319953	-0.152269	0.0588591
61.4004	-0.288918	0.0455592	-0.140259	0.0604939
61.5	-0.286771	0.05881	-0.129226	0.0619042
61.5996	-0.283802	0.071603	-0.11955	0.0630478
61.7002	-0.280228	0.0838161	-0.111492	0.0638962
61.7998	-0.276237	0.0953226	-0.105311	0.0644554
61.9004	-0.272066	0.106052	-0.101138	0.0647186
62	-0.267935	0.115913	-0.0990728	0.0647319
62.0996	-0.264056	0.12488	-0.099094	0.0645487
62.2002	-0.260635	0.132872	-0.101143	0.0642717
62.2998	-0.257841	0.139852	-0.105078	0.0639982
62.4004	-0.255765	0.145795	-0.110687	0.0639011
62.5	-0.254544	0.150648	-0.117743	0.0641249
62.5996	-0.254177	0.154367	-0.125944	0.0648458
62.7002	-0.254723	0.156917	-0.135007	0.06625
62.7998	-0.256152	0.158294	-0.144641	0.0685379
62.9004	-0.258421	0.158485	-0.15455	0.07186
63	-0.26146	0.157508	-0.164467	0.0763842
63.0996	-0.265187	0.155405	-0.174133	0.0822205
63.2002	-0.269511	0.152213	-0.183348	0.0894797
63.2998	-0.274352	0.148018	-0.191951	0.0982013
63.4004	-0.279615	0.142914	-0.199805	0.10841
63.5	-0.285238	0.137033	-0.206792	0.120041
63.5996	-0.291157	0.130529	-0.212804	0.133004
63.7002	-0.297299	0.123554	-0.21779	0.147175
63.7998	-0.303638	0.116308	-0.221682	0.162351
63.9004	-0.310117	0.108948	-0.224416	0.178301
64	-0.316718	0.10164	-0.225914	0.194788
64.0996	-0.323375	0.0945333	-0.226099	0.211522
64.2002	-0.33003	0.0878161	-0.22484	0.228241
64.2998	-0.336614	0.0816015	-0.222001	0.244611
64.4004	-0.343046	0.0759954	-0.217401	0.260357
64.5	-0.349204	0.0710597	-0.210888	0.27516
64.5996	-0.354971	0.0668301	-0.202282	0.288755
64.7002	-0.360151	0.0632975	-0.191501	0.300837
64.7998	-0.364581	0.0604245	-0.178415	0.311192
64.9004	-0.368062	0.0581085	-0.162999	0.319616
65	-0.370374	0.0562453	-0.145245	0.325927
65.0996	-0.371342	0.0546684	-0.125294	0.329996
65.2002	-0.370714	0.053219	-0.103328	0.331702
65.2998	-0.368354	0.0517002	-0.0796692	0.330985
65.4004	-0.364045	0.049895	-0.0547238	0.327774
65.5	-0.357681	0.0476151	-0.0289934	0.322061
65.5996	-0.349169	0.0446645	-0.00303591	0.313885
65.7002	-0.338495	0.0408742	0.0225278	0.303277
65.7998	-0.325716	0.0361288	0.0470647	0.290319
65.9004	-0.310913	0.0303242	0.0698866	0.275103
66	-0.294273	0.0234546	0.0903408	0.257778
66.0996	-0.276025	0.0155257	0.107826	0.238508
66.2002	-0.256484	0.00663145	0.121812	0.217486
66.2998	-0.235971	-0.00309176	0.131867	0.1949
66.4004	-0.214836	-0.0134045	0.13767	0.171024
66.5	-0.193433	-0.0240403	0.139027	0.146138
66.5996	-0.17216	-0.0346541	0.13589	0.120502
66.7002	-0.151321	-0.0448812	0.128342	0.0944443
66.7998	-0.131288	-0.0543004	0.116606	0.0682393
66.9004	-0.112302	-0.0625238	0.101022	0.0422302
67	-0.0946283	-0.0690678	0.0820727	0.0166965
67.0996	-0.0784255	-0.0735494	0.0602912	-0.00804651
67.2002	-0.063793	-0.0755281	0.0362784	-0.0317255
67.2998	-0.0507187	-0.0746952	0.0107002	-0.0541286
67.4004	-0.0391581	-0.0707837	-0.0157549	-0.0750651
67.5	-0.0289802	-0.0635808	-0.042387	-0.0944049
67.5996	-0.0200698	-0.0529718	-0.0685387	-0.112063
67.7002	-0.0121839	-0.0388864	-0.0935636	-0.128034
67.7998	-0.00511951	-0.0213605	-0.11689	-0.142339
67.9004	0.00136366	-0.000529899	-0.137982	-0.155075
68	0.00746199	0.0234051	-0.156362	-0.166328
68.0996	0.0133789	0.0501702	-0.171678	-0.176291
68.2002	0.0192725	0.0794206	-0.183624	-0.185138
68.2998	0.025234	0.110763	-0.192044	-0.193085
68.4004	0.0312991	0.143808	-0.19679	-0.200322
68.5	0.037438	0.178085	-0.197851	-0.207027
68.5996	0.0435492	0.213146	-0.195249	-0.213341
68.7002	0.0494891	0.248547	-0.189116	-0.219384
68.7998	0.0550227	0.28386	-0.179644	-0.225234
68.9004	0.0598727	0.318664	-0.167124	-0.230886
69	0.0637326	0.352591	-0.151843	-0.23631
69.0996	0.066288	0.385306	-0.134187	-0.241419
69.2002	0.0672141	0.416498	-0.114526	-0.246098
69.2998	0.0661805	0.445912	-0.0933341	-0.250151
69.4004	0.0629236	0.473344	-0.0710498	-0.253427
69.5	0.057212	0.498629	-0.0481337	-0.255673
69.5996	0.0488872	0.521665	-0.0250241	-0.256688
69.7002	0.0378692	0.542309	-0.00215164	-0.256226
69.7998	0.02417	0.560507	0.0200749	-0.254132
69.9004	0.0079002	0.576184	0.0412937	-0.250221
70	-0.0107917	0.589317	0.0611903	-0.244395
70.0996	-0.0316073	0.599827	0.0795041	-0.236573
70.2002	-0.0542081	0.60772	0.0960329	-0.226731
70.2998	-0.0782264	0.612911	0.110657	-0.214906
70.4004	-0.103213	0.615379	0.123296	-0.201199
70.5	-0.128733	0.615051	0.133953	-0.18576
70.5996	-0.15432	0.611898	0.142667	-0.168824
70.7002	-0.179563	0.605847	0.149521	-0.15065
70.7998	-0.20406	0.596866	0.154687	-0.131566
70.9004	-0.22749	0.584924	0.158288	-0.111923
71	-0.24955	0.569981	0.160517	-0.0920934
71.0996	-0.27004	0.552097	0.16154	-0.0724799
71.2002	-0.288812	0.531332	0.161527	-0.0534553
71.2998	-0.305815	0.507842	0.160652	-0.0354012
71.4004	-0.320986	0.481805	0.159032	-0.0186771
71.5	-0.334409	0.453476	0.156783	-0.00360838
71.5996	-0.346126	0.42315	0.153968	0.00951104
71.7002	-0.356281	0.391203	0.150641	0.0204828
71.7998	-0.364971	0.358028	0.14679	0.0291188
71.9004	-0.372348	0.32413	0.142355	0.0353452
72	-0.378504	0.289967	0.137291	0.0391099
72.0996	-0.383554	0.256063	0.131464	0.0404678
72.2002	-0.387545	0.222879	0.124764	0.0394909
72.2998	-0.390543	0.190914	0.117047	0.0363471
72.4004	-0.392537	0.160594	0.108195	0.031245
72.5	-0.393502	0.132348	0.0980752	0.0244439
72.5996	-0.393352	0.10648	0.0865984	0.0162404
72.7002	-0.392035	0.0832775	0.0736786	0.00696497
72.7998	-0.389463	0.0629459	0.0592536	-0.00306607
72.9004	-0.385552	0.0456166	0.0433236	-0.0134911
73	-0.380217	0.031344	0.0258962	-0.023973
73.0996	-0.373362	0.0201299	0.00711289	-0.0341515
73.2002	-0.364942	0.0119032	-0.0129221	-0.0437256
73.2998	-0.354929	0.00653599	-0.0340275	-0.0523815
73.4004	-0.343338	0.00385536	-0.055942	-0.0598569
73.5	-0.33021	0.00364927	-0.0783957	-0.0659062
73.5996	-0.315588	0.00565457	-0.101085	-0.0703616
73.7002	-0.299584	0.00957443	-0.123659	-0.0730453
73.7998	-0.282332	0.0151249	-0.145721	-0.0738883
73.9004	-0.263961	0.0219652	-0.166857	-0.0728419
74	-0.244645	0.0297509	-0.186619	-0.0699646
74.0996	-0.224554	0.0381653	-0.204573	-0.0653022
74.2002	-0.203857	0.0468589	-0.220294	-0.0590123
74.2998	-0.182762	0.0555255	-0.233394	-0.0512575
74.4004	-0.161488	0.0638388	-0.243507	-0.0422802
74.5	-0.140247	0.0714937	-0.250306	-0.0323214
74.5996	-0.119218	0.0782447	-0.25357	-0.0216584
74.7002	-0.0985895	0.0838596	-0.253095	-0.0105757
74.7998	-0.0785631	0.0881614	-0.248777	0.000602479
74.9004	-0.0593037	0.0910313	-0.240615	0.0115906
75	-0.0410216	0.0923864	-0.228684	0.022103
75.0996	-0.0238732	0.092237	-0.213184	0.0318786
75.2002	-0.0080595	0.0906264	-0.194377	0.0407099
75.2998	0.00622178	0.08767	-0.172645	0.0484167
75.4004	0.0187936	0.0835277	-0.148419	0.054864
75.5	0.0294333	0.0784562	-0.122188	0.0599536
75.5996	0.037966	0.0726889	-0.0945149	0.0636081
75.7002	0.0442154	0.0665448	-0.0659806	0.0657972
75.7998	0.0480212	0.0603319	-0.037217	0.0665508
75.9004	0.0492272	0.0544362	-0.00883454	0.0658804
76	0.0477059	0.0491798	0.0185906	0.0638621
76.0996	0.0433711	0.0449395	0.0445248	0.0605509
76.2002	0.0361815	0.0420226	0.0685442	0.0560116
76.2998	0.0260984	0.0407105	0.0902338	0.0503667
76.4004	0.01317	0.0412634	0.109292	0.0436373
76.5	-0.0025223	0.043856	0.125492	0.0359141
76.5996	-0.0208198	0.0486536	0.138694	0.0272671
76.7002	-0.0415228	0.0557177	0.148898	0.017755
76.7998	-0.0643647	0.0650407	0.156124	0.00749555
76.9004	-0.0890073	0.0765583	0.160518	-0.00344865
77	-0.115106	0.0901226	0.162226	-0.0149522
77.0996	-0.142255	0.105511	0.161466	-0.0268981
77.2002	-0.170009	0.122444	0.158459	-0.0391696
77.2998	-0.197939	0.140562	0.153487	-0.0515628
77.4004	-0.225586	0.159489	0.146763	-0.0639064
77.5	-0.252549	0.178769	0.138526	-0.0759987
77.5996	-0.278402	0.197937	0.12893	-0.0876133
77.7002	-0.302804	0.21653	0.118134	-0.098551
77.7998	-0.325453	0.234071	0.106255	-0.108573
77.9004	-0.346103	0.250087	0.0933437	-0.117465
78	-0.364576	0.264122	0.0794468	-0.125047
78.0996	-0.3808	0.275787	0.064553	-0.131158
78.2002	-0.394728	0.284745	0.0486782	-0.135703
78.2998	-0.406422	0.29071	0.0318183	-0.138626
78.4004	-0.41596	0.293477	0.0139779	-0.139895
78.5	-0.423479	0.292967	-0.00474308	-0.139559
78.5996	-0.429141	0.289122	-0.0242741	-0.137716
78.7002	-0.433123	0.282026	-0.0444243	-0.134521
78.7998	-0.435598	0.271783	-0.0649736	-0.130161
78.9004	-0.436748	0.258626	-0.0855922	-0.1249
79	-0.436749	0.242846	-0.105913	-0.118986
79.0996	-0.435704	0.224741	-0.125473	-0.112697
79.2002	-0.433731	0.204673	-0.143802	-0.106315
79.2998	-0.430879	0.183034	-0.160358	-0.100052
79.4004	-0.427192	0.160198	-0.174592	-0.0941668
79.5	-0.422657	0.136539	-0.185949	-0.0888142
79.5996	-0.417288	0.112419	-0.193932	-0.0841418
79.7002	-0.411013	0.0881426	-0.19809	-0.0802318
79.7998	-0.403844	0.0639764	-0.198077	-0.0771057
79.9004	-0.395767	0.0401462	-0.193625	-0.074734
80	-0.386862	0.0168478	-0.184618	-0.0730572
80.0996	-0.377155	-0.00576111	-0.171063	-0.0719635
80.2002	-0.366798	-0.0275313	-0.1531	-0.0713174
80.2998	-0.355911	-0.0483531	-0.131023	-0.0709428
80.4004	-0.344703	-0.0681617	-0.105299	-0.0706678
80.5	-0.333372	-0.0868714	-0.0764645	-0.0703486
80.5996	-0.322165	-0.104389	-0.045233	-0.0698369
80.7002	-0.311284	-0.120586	-0.012293	-0.0690296
80.7998	-0.301007	-0.13532	0.0215128	-0.0678421
80.9004	-0.291472	-0.148416	0.0553662	-0.0662531
81	-0.282885	-0.159688	0.0884645	-0.0643039
81.0996	-0.275308	-0.168914	0.119988	-0.0620441
81.2002	-0.2688	-0.175891	0.149268	-0.0595739
81.2998	-0.263317	-0.180405	0.175625	-0.0570644
81.4004	-0.258761	-0.182271	0.198558	-0.0546841
81.5	-0.254997	-0.181326	0.217633	-0.0526173
81.5996	-0.251791	-0.177429	0.232587	-0.0510487
81.7002	-0.248888	-0.170538	0.24325	-0.0501988
81.7998	-0.246009	-0.160672	0.249595	-0.0502087
81.9004	-0.242869	-0.147955	0.25172	-0.0512229
82	-0.239198	-0.132568	0.249801	-0.0533107
82.0996	-0.234714	-0.114799	0.244144	-0.0565311
82.2002	-0.229218	-0.0950084	0.235095	-0.0608491
82.2998	-0.222522	-0.0736523	0.223073	-0.0662212
82.4004	-0.214499	-0.05124	0.208558	-0.0725038
82.5	-0.205085	-0.0282848	0.192041	-0.0795362
82.5996	-0.194277	-0.00537494	0.17399	-0.0870732
82.7002	-0.182112	0.0169482	0.154865	-0.0948963
82.7998	-0.168681	0.0381122	0.135091	-0.102695
82.9004	-0.154097	0.0576075	0.115049	-0.110149
83	-0.138462	0.0749547	0.095074	-0.116959
83.0996	-0.121938	0.0897633	0.0754283	-0.12286
83.2002	-0.104594	0.101735	0.056325	-0.127575
83.2998	-0.0865525	0.110627	0.0378669	-0.130887
83.4004	-0.067828	0.116316	0.020106	-0.132622
83.5	-0.0484945	0.118746	0.00307253	-0.132684
83.5996	-0.0285589	0.117943	-0.0132911	-0.131007
83.7002	-0.00804593	0.11402	-0.0290402	-0.127635
83.7998	0.0130251	0.107159	-0.0442563	-0.122676
83.9004	0.0346393	0.097604	-0.059026	-0.116306
84	0.0567487	0.0856274	-0.0734169	-0.108733
84.0996	0.0792713	0.0715364	-0.0874467	-0.100269
84.2002	0.102034	0.0556623	-0.101137	-0.0912207
84.2998	0.124822	0.0383363	-0.11438	-0.0819953
84.4004	0.147336	0.0199126	-0.127069	-0.0729445
84.5	0.169208	0.000706615	-0.138987	-0.0644808
84.5996	0.189982	-0.0189608	-0.149861	-0.0569749
84.7002	0.209167	-0.0387559	-0.159409	-0.0507761
84.7998	0.226208	-0.0583819	-0.16725	-0.0462155
84.9004	0.240607	-0.0775196	-0.173029	-0.0435381
85	0.251824	-0.0958926	-0.176343	-0.0429789
85.0996	0.259403	-0.1132	-0.176878	-0.0446359
85.2002	0.262931	-0.129152	-0.174323	-0.048569
85.2998	0.262129	-0.143475	-0.16846	-0.0547547
85.4004	0.256841	-0.155911	-0.159142	-0.0630707
85.5	0.24703	-0.166215	-0.146343	-0.0733668
85.5996	0.232832	-0.174139	-0.130125	-0.0853689
85.7002	0.214541	-0.179494	-0.110699	-0.0987649
85.7998	0.19262	-0.182116	-0.0883905	-0.1132
85.9004	0.167644	-0.1819	-0.0636528	-0.128279
86	0.140308	-0.178792	-0.037039	-0.143555
86.0996	0.111384	-0.172784	-0.00923332	-0.158583
86.2002	0.0816733	-0.163943	0.0190698	-0.172897
86.2998	0.0519936	-0.15243	0.0470525	-0.186098
86.4004	0.023143	-0.13845	0.0739468	-0.197754
86.5	-0.00414753	-0.122316	0.0989262	-0.207508
86.5996	-0.0292542	-0.104403	0.121259	-0.215064
86.7002	-0.0517045	-0.0850885	0.140228	-0.220114
86.7998	-0.0711435	-0.0648076	0.155257	-0.22248
86.9004	-0.0873837	-0.0440232	0.165839	-0.221979
87	-0.100378	-0.0232373	0.171636	-0.218574
87.0996	-0.110241	-0.00289108	0.172412	-0.212261
87.2002	-0.117227	0.0165702	0.168102	-0.203149
87.2998	-0.121749	0.0347799	0.158771	-0.191375
87.4004	-0.12426	0.051381	0.144666	-0.177179
87.5	-0.12531	0.0660758	0.126177	-0.160853
87.5996	-0.125454	0.0786659	0.103806	-0.142734
87.7002	-0.125292	0.0889594	0.0781582	-0.123202
87.7998	-0.125334	0.0968913	0.0498962	-0.102673
87.9004	-0.126063	0.102383	0.0197576	-0.08157
88	-0.127873	0.105442	-0.0115268	-0.0603158
88.0996	-0.131046	0.106087	-0.0431969	-0.0393394
88.2002	-0.135742	0.104415	-0.0745743	-0.0190276
88.2998	-0.142034	0.100487	-0.105013	0.000234842
88.4004	-0.149827	0.0944567	-0.133967	0.0181322
88.5	-0.158977	0.0864149	-0.160946	0.0343866
88.5996	-0.169198	0.0765118	-0.1856	0.0487995
88.7002	-0.180159	0.0648546	-0.207675	0.0612702
88.7998	-0.191461	0.0515784	-0.227058	0.0717242
88.9004	-0.202692	0.0368292	-0.243697	0.0801812
89	-0.213447	0.020736	-0.257702	0.0866929
89.0996	-0.223353	0.00344886	-0.269194	0.0914089
89.2002	-0.232093	-0.0148858	-0.278436	0.0944756
89.2998	-0.239379	-0.03408	-0.285663	0.0961061
89.4004	-0.245032	-0.0539338	-0.291185	0.0965101
89.5	-0.248955	-0.0742541	-0.295289	0.0959161
89.5996	-0.251162	-0.0948155	-0.298264	0.0945143
89.7002	-0.251727	-0.11538	-0.300394	0.0925522
89.7998	-0.250841	-0.135702	-0.301887	0.090177
89.9004	-0.248721	-0.155531	-0.302956	0.0875363
90	-0.245658	-0.174626	-0.303682	0.0847166
90.0996	-0.241947	-0.192751	-0.304132	0.0817661
90.2002	-0.237911	-0.209686	-0.304278	0.0786988
90.2998	-0.2338	-0.225235	-0.304044	0.0754975
90.4004	-0.229886	-0.239266	-0.303323	0.0721167
90.5	-0.226359	-0.251647	-0.301943	0.0684604
90.5996	-0.223353	-0.262325	-0.299723	0.0644629
90.7002	-0.220937	-0.271271	-0.29642	0.0599943
90.7998	-0.219128	-0.278482	-0.291832	0.0549702
90.9004	-0.217834	-0.284009	-0.285731	0.0492841
91	-0.216936	-0.287909	-0.277932	0.0428972
91.0996	-0.216251	-0.290302	-0.268279	0.0357829
91.2002	-0.215581	-0.291292	-0.256636	0.0279719
91.2998	-0.214734	-0.291055	-0.242947	0.0195122
91.4004	-0.213503	-0.289705	-0.227162	0.010501
91.5	-0.211696	-0.287427	-0.209336	0.00111636
91.5996	-0.209168	-0.284318	-0.189542	-0.00844811
91.7002	-0.205774	-0.280553	-0.167897	-0.0179537
91.7998	-0.20147	-0.27623	-0.144582	-0.0271399
91.9004	-0.196238	-0.271477	-0.119781	-0.0357109
92	-0.190131	-0.266367	-0.0937041	-0.0433862
92.0996	-0.183214	-0.261002	-0.0665751	-0.0498515
92.2002	-0.175572	-0.255454	-0.0386698	-0.0548476
92.2998	-0.167349	-0.249794	-0.0102392	-0.0580759
92.4004	-0.158665	-0.244092	0.0184714	-0.0593287
92.5	-0.149654	-0.238395	0.047194	-0.0584211
92.5996	-0.14046	-0.232738	0.0757012	-0.0552365
92.7002	-0.131163	-0.227139	0.103735	-0.0496803
92.7998	-0.12184	-0.221618	0.131089	-0.0417603
92.9004	-0.112516	-0.216158	0.157505	-0.0315337
93	-0.103166	-0.210724	0.18277	-0.0191363
93.0996	-0.0937731	-0.205283	0.206676	-0.00476644
93.2002	-0.0842288	-0.199777	0.229004	0.0112913
93.2998	-0.0744531	-0.194124	0.249583	0.0287565
93.4004	-0.0643287	-0.188235	0.268174	0.0472647
93.5	-0.053752	-0.181999	0.284617	0.0664683
93.5996	-0.0426631	-0.175321	0.298731	0.0859464
93.7002	-0.0309697	-0.168074	0.31038	0.10531
93.7998	-0.0186976	-0.160183	0.319396	0.124155
93.9004	-0.00587377	-0.151553	0.3257	0.142132
94	0.00739432	-0.142141	0.329165	0.158878
94.0996	0.0209631	-0.131913	0.329758	0.174133
94.2002	0.0346445	-0.120871	0.327413	0.187619
94.2998	0.0481755	-0.109041	0.32211	0.199178
94.4004	0.0612555	-0.0964736	0.313876	0.208639
94.5	0.0735691	-0.0832367	0.302758	0.215972
94.5996	0.0847913	-0.0694089	0.288852	0.221125
94.7002	0.0945901	-0.0551047	0.272241	0.224138
94.7998	0.102666	-0.0404549	0.253083	0.225078
94.9004	0.108723	-0.0255652	0.231511	0.224059
95	0.112561	-0.0105682	0.207748	0.221227
95.0996	0.114048	0.00443927	0.182006	0.216776
95.2002	0.113157	0.019315	0.154539	0.210877
95.2998	0.109934	0.0339227	0.125594	0.203725
95.4004	0.104508	0.0481201	0.0954674	0.19551
95.5	0.0971426	0.0617596	0.0644267	0.186406
95.5996	0.0881378	0.0747083	0.0328026	0.176574
95.7002	0.0779243	0.0868055	0.000864229	0.16614
95.7998	0.0669531	0.0978809	-0.0310289	0.155228
95.9004	0.0557614	0.107764	-0.0626159	0.14391
96	0.0448457	0.116307	-0.0935715	0.132242
96.0996	0.0347754	0.123316	-0.12366	0.120275
96.2002	0.0260441	0.128639	-0.152596	0.107972
96.2998	0.0191477	0.132097	-0.18018	0.0953505
96.4004	0.014466	0.133607	-0.206204	0.0823588
96.5	0.0123302	0.133035	-0.230513	0.0689971
96.5996	0.0129413	0.130371	-0.252982	0.055225
96.7002	0.0164291	0.125633	-0.273517	0.0410387
96.7998	0.0227901	0.118902	-0.292016	0.0264637
96.9004	0.0318931	0.110288	-0.308488	0.0115081
97	0.0435291	0.0999694	-0.322904	-0.00373018
97.0996	0.0573627	0.0881527	-0.335305	-0.0191967
97.2002	0.072974	0.075098	-0.345708	-0.0347225
97.2998	0.0898832	0.0610729	-0.354161	-0.0501539
97.4004	0.107563	0.0463743	-0.360726	-0.0652622
97.5	0.125457	0.0312802	-0.365484	-0.079832
97.5996	0.143018	0.0160782	-0.368476	-0.0936106
97.7002	0.159731	0.00100976	-0.369789	-0.106354
97.7998	0.175098	-0.0136735	-0.369433	-0.11776
97.9004	0.188699	-0.0278104	-0.36749	-0.12759
98	0.200217	-0.0412695	-0.363998	-0.135603
98.0996	0.209384	-0.0539504	-0.359016	-0.14158
98.2002	0.216061	-0.0658485	-0.352552	-0.145367
98.2998	0.220153	-0.0769705	-0.344675	-0.146805
98.4004	0.221722	-0.0873985	-0.335415	-0.145816
98.5	0.220877	-0.0971886	-0.324841	-0.142347
98.5996	0.217838	-0.106467	-0.313002	-0.136397
98.7002	0.21291	-0.115389	-0.300028	-0.128041
98.7998	0.206409	-0.124059	-0.285987	-0.117375
98.9004	0.198708	-0.132635	-0.271033	-0.104583
99	0.190186	-0.14121	-0.255317	-0.089883
99.0996	0.181244	-0.149908	-0.238989	-0.0735462
99.2002	0.172287	-0.158762	-0.222253	-0.055856
99.2998	0.163668	-0.167818	-0.205278	-0.0371321
99.4004	0.155728	-0.177052	-0.188313	-0.0177169
99.5	0.148772	-0.186434	-0.171529	0.00201016
99.5996	0.143045	-0.195888	-0.15514	0.0216681
99.7002	0.138715	-0.205309	-0.139279	0.0408739
99.7998	0.13592	-0.21456	-0.124105	0.0592735
99.9004	0.134712	-0.223475	-0.109685	0.0765111
100	0.135106	-0.231879	-0.0960598	0.0922351
100.1	0.137029	-0.239566	-0.0832126	0.106186
100.2	0.14038	-0.246318	-0.0710511	0.118101
100.3	0.144992	-0.251935	-0.059447	0.127785
100.4	0.150666	-0.256221	-0.0482077	0.135121
100.5	0.157173	-0.259019	-0.0371334	0.140031
100.6	0.16425	-0.260135	-0.0259741	0.142481
100.7	0.171589	-0.259479	-0.0144833	0.142567
100.8	0.178885	-0.256908	-0.00243264	0.140397
100.9	0.185808	-0.252372	0.0104124	0.136195
101	0.192055	-0.245824	0.0242227	0.130205
101.1	0.197326	-0.237303	0.0391431	0.122777
101.2	0.201367	-0.226841	0.0551833	0.11425
101.3	0.203939	-0.214566	0.0723279	0.105021
101.4	0.204863	-0.200624	0.090443	0.0955065
101.5	0.203979	-0.185268	0.109325	0.0861191
101.6	0.201181	-0.16873	0.128676	0.077228
101.7	0.196427	-0.151306	0.14811	0.0692184
101.8	0.189721	-0.133324	0.167241	0.062393
101.9	0.181118	-0.115157	0.185568	0.0569904
102	0.170719	-0.0971538	0.202605	0.0531938
102.1	0.158686	-0.079694	0.217873	0.0511162
102.2	0.145196	-0.0631421	0.230868	0.0507502
102.3	0.130476	-0.0478162	0.241172	0.0520278
102.4	0.11475	-0.0340225	0.248389	0.0547926
102.5	0.0983019	-0.0220224	0.252245	0.0588164
102.6	0.0813947	-0.0119964	0.252519	0.0638216
102.7	0.0643325	-0.00410923	0.249105	0.0694629
102.8	0.0474046	0.00163739	0.241968	0.0753557
102.9	0.0308892	0.00523097	0.231187	0.0810813
103	0.0150521	0.00677234	0.21696	0.0862563
103.1	0.000132679	0.00639479	0.199542	0.0904765
103.2	-0.0136176	0.00430512	0.179297	0.0934264
103.3	-0.0259698	0.000763335	0.156642	0.0947662
103.4	-0.0367287	-0.00391696	0.132037	0.0942643
103.5	-0.0457232	-0.00944764	0.105984	0.0917272
103.6	-0.052804	-0.0155048	0.0790064	0.087066
103.7	-0.0578652	-0.0218097	0.0516263	0.0802363
103.8	-0.0608409	-0.0280481	0.0243654	0.0712647
103.9	-0.0616967	-0.0339867	-0.0022703	0.0603238
104	-0.0604666	-0.0394263	-0.0278224	0.0475733
104.1	-0.0572791	-0.0442245	-0.0518288	0.0332635
104.2	-0.052257	-0.0482677	-0.0739193	0.0177146
104.3	-0.0456326	-0.0514802	-0.0937225	0.00127341
104.4	-0.0376669	-0.0538642	-0.110969	-0.0156553
104.5	-0.0286897	-0.0554646	-0.125431	-0.0326893
104.6	-0.0190998	-0.0563635	-0.136943	-0.0494039
104.7	-0.00931412	-0.056662	-0.145391	-0.0653826
104.8	0.000238321	-0.0564944	-0.150743	-0.08024
104.9	0.00907998	-0.0559785	-0.152977	-0.0935547
105	0.0168014	-0.0552516	-0.152202	-0.104966
105.1	0.0229496	-0.054431	-0.148547	-0.11414
105.2	0.0271477	-0.0536451	-0.14224	-0.120807
105.3	0.0290805	-0.0530033	-0.133581	-0.124774
105.4	0.028505	-0.0526036	-0.122886	-0.125838
105.5	0.0252337	-0.0525036	-0.110544	-0.123941
105.6	0.0192077	-0.0527892	-0.0969867	-0.119052
105.7	0.0104661	-0.0534726	-0.0826943	-0.11122
105.8	-0.00087012	-0.0545967	-0.0681873	-0.10059
105.9	-0.014594	-0.0561762	-0.0539856	-0.0873496
106	-0.030456	-0.0582181	-0.0406071	-0.0717703
106.1	-0.0480924	-0.0607283	-0.0285717	-0.0541915
106.2	-0.0671347	-0.0636862	-0.018366	-0.0349644
106.3	-0.0871135	-0.0670739	-0.0103966	-0.0145332
106.4	-0.107643	-0.0708361	-0.0050775	0.00666321
106.5	-0.128315	-0.0749779	-0.00265806	0.028141
106.6	-0.148763	-0.0794512	-0.00336003	0.049453
106.7	-0.168653	-0.0842182	-0.0072859	0.0700983
106.8	-0.187721	-0.0892264	-0.0144543	0.08965
106.9	-0.20577	-0.0944043	-0.0247513	0.1077
107	-0.222691	-0.0996782	-0.0379776	0.123855
107.1	-0.238411	-0.104978	-0.0538552	0.1378
107.2	-0.252932	-0.110209	-0.072016	0.149232
107.3	-0.266303	-0.11527	-0.0920651	0.157968
107.4	-0.278634	-0.120038	-0.113521	0.163854
107.5	-0.29005	-0.124381	-0.135901	0.166829
107.6	-0.300703	-0.128159	-0.158709	0.166831
107.7	-0.310739	-0.13122	-0.181469	0.163915
107.8	-0.320296	-0.133417	-0.203721	0.158165
107.9	-0.329486	-0.134586	-0.22504	0.14975
108	-0.338383	-0.134563	-0.245107	0.138865
108.1	-0.347012	-0.133197	-0.263608	0.125716
108.2	-0.355365	-0.130311	-0.280362	0.110611
108.3	-0.363382	-0.125784	-0.295165	0.0938323
108.4	-0.370968	-0.11948	-0.307968	0.0757225
108.5	-0.377966	-0.111328	-0.318709	0.0566199
108.6	-0.384199	-0.101262	-0.327417	0.036914
108.7	-0.389457	-0.0892717	-0.334145	0.0169478
108.8	-0.393545	-0.0754366	-0.338972	-0.00290899
108.9	-0.396257	-0.0598459	-0.342023	-0.0223651
109	-0.397409	-0.0426562	-0.343442	-0.041079
109.1	-0.396852	-0.0240865	-0.343345	-0.0588069
109.2	-0.394463	-0.00438681	-0.341871	-0.075288
109.3	-0.390177	0.0161099	-0.339149	-0.0903527
109.4	-0.383973	0.0371003	-0.335308	-0.103897
109.5	-0.375903	0.0582004	-0.330464	-0.115875
109.6	-0.366045	0.0790312	-0.324739	-0.126294
109.7	-0.354536	0.0992458	-0.318241	-0.135206
109.8	-0.341567	0.118526	-0.311053	-0.142782
109.9	-0.327389	0.13657	-0.303285	-0.149186
110	-0.312278	0.15314	-0.295005	-0.154661
110.1	-0.296544	0.168034	-0.286318	-0.15944
110.2	-0.280477	0.181141	-0.27723	-0.163804
110.3	-0.264397	0.19241	-0.267821	-0.167998
110.4	-0.248576	0.201884	-0.258121	-0.172285
110.5	-0.233292	0.209648	-0.248142	-0.176866
110.6	-0.218787	0.215868	-0.237871	-0.18191
110.7	-0.205226	0.220714	-0.227241	-0.187495
110.8	-0.192758	0.224401	-0.216208	-0.193638
110.9	-0.181476	0.227134	-0.204668	-0.200297
111	-0.17141	0.229178	-0.192524	-0.207359
111.1	-0.162555	0.230713	-0.179663	-0.214622
111.2	-0.154864	0.23195	-0.165945	-0.221815
111.3	-0.148276	0.232998	-0.151279	-0.228634
111.4	-0.142679	0.233962	-0.135534	-0.23471
111.5	-0.13797	0.234895	-0.11866	-0.23967
111.6	-0.13399	0.23579	-0.100637	-0.243139
111.7	-0.130645	0.236613	-0.0815196	-0.244768
111.8	-0.127788	0.237261	-0.0614153	-0.244205
111.9	-0.12532	0.237623	-0.0404855	-0.241195
112	-0.123094	0.23757	-0.0190048	-0.235526
112.1	-0.121063	0.236975	0.00271955	-0.22709
112.2	-0.119116	0.235686	0.0242947	-0.215839
112.3	-0.117275	0.2336	0.0452874	-0.201888
112.4	-0.115487	0.230623	0.0652377	-0.185389
112.5	-0.113763	0.226733	0.0836885	-0.166612
112.6	-0.112082	0.221889	0.100182	-0.145885
112.7	-0.110438	0.216123	0.114305	-0.123647
112.8	-0.10883	0.209506	0.125711	-0.100359
112.9	-0.107252	0.202164	0.134123	-0.0765479
113	-0.105705	0.194235	0.139408	-0.0527365
113.1	-0.104193	0.185896	0.141459	-0.0294741
113.2	-0.1027	0.17735	0.140355	-0.00727455
113.3	-0.101241	0.168818	0.136276	0.0133944
113.4	-0.0997688	0.160552	0.129496	0.0320747
113.5	-0.0982916	0.152767	0.120432	0.0484368
113.6	-0.0967803	0.145701	0.109578	0.0622292
113.7	-0.0952234	0.139561	0.0974568	0.0732591
113.8	-0.0935712	0.134561	0.0846846	0.0814228
113.9	-0.0918299	0.130864	0.0718628	0.0867093
114	-0.0899678	0.128637	0.0595738	0.0892238
114.1	-0.0880023	0.128012	0.0484005	0.0891153
114.2	-0.0859054	0.129065	0.0388164	0.086622
114.3	-0.0836795	0.131809	0.0312625	0.0820327
114.4	-0.0813079	0.13623	0.0260317	0.0756874
114.5	-0.0787622	0.142209	0.023342	0.0679627
114.6	-0.0760167	0.14962	0.0232667	0.05924
114.7	-0.0730352	0.158229	0.0257874	0.0499211
114.8	-0.0697841	0.167772	0.030745	0.0403383
114.9	-0.0661785	0.177925	0.0379029	0.0308177
115	-0.0622057	0.188313	0.0469294	0.0216156
115.1	-0.0577764	0.198528	0.0574172	0.0129955
115.2	-0.0528669	0.208136	0.0689206	0.005094
115.3	-0.0474299	0.216674	0.080958	-0.00194987
115.4	-0.0414227	0.223723	0.0930823	-0.00809796
115.5	-0.0348686	0.228868	0.104795	-0.0133287
115.6	-0.0277808	0.231719	0.115718	-0.0176879
115.7	-0.0202187	0.231953	0.125435	-0.0212328
115.8	-0.0122851	0.229351	0.133675	-0.0240724
115.9	-0.00410708	0.223722	0.140187	-0.0263364
116	0.00412565	0.214991	0.14488	-0.0281342
116.1	0.0121765	0.203151	0.147683	-0.0295876
116.2	0.0198251	0.188297	0.148671	-0.030783
116.3	0.0267604	0.170594	0.147936	-0.0317801
116.4	0.032717	0.150285	0.145678	-0.0326483
116.5	0.0373893	0.127675	0.142101	-0.0333914
116.6	0.0404856	0.103135	0.137471	-0.0340216
116.7	0.0417555	0.0770811	0.13204	-0.0345168
116.8	0.0409362	0.0499219	0.126118	-0.0348224
116.9	0.0378899	0.0221214	0.119968	-0.0349024
117	0.0324576	-0.00589226	0.113839	-0.034725
117.1	0.0246312	-0.0336849	0.107946	-0.0342783
117.2	0.0144004	-0.0608574	0.102502	-0.0335535
117.3	0.00187246	-0.0870146	0.0976233	-0.0325898
117.4	-0.0127663	-0.111783	0.0934428	-0.0314112
117.5	-0.0292502	-0.134819	0.0899946	-0.0301209
117.6	-0.0472478	-0.155805	0.087298	-0.0288233
117.7	-0.066358	-0.174481	0.0853015	-0.0276457
117.8	-0.0861373	-0.190603	0.0839128	-0.0267201
117.9	-0.106098	-0.203929	0.0829975	-0.0261778
118	-0.12575	-0.21429	0.0823868	-0.0261931
118.1	-0.144612	-0.221524	0.0818713	-0.0268568
118.2	-0.162182	-0.225495	0.0812141	-0.0282771
118.3	-0.178033	-0.226125	0.080129	-0.0304882
118.4	-0.191743	-0.223372	0.0783501	-0.033524
118.5	-0.202995	-0.217228	0.0755548	-0.0373383
118.6	-0.211522	-0.207721	0.0714473	-0.0418422
118.7	-0.217162	-0.19492	0.0657174	-0.0469106
118.8	-0.219833	-0.178929	0.0581065	-0.0523897
118.9	-0.219511	-0.159915	0.0483621	-0.0580825
119	-0.21629	-0.138108	0.0362644	-0.0637489
119.1	-0.210339	-0.113763	0.0216933	-0.0691703
119.2	-0.201915	-0.0871706	0.00456553	-0.0741035
119.3	-0.191335	-0.0586725	-0.0150926	-0.0783269
119.4	-0.17899	-0.0286262	-0.0372114	-0.0816434
119.5	-0.165271	0.00256289	-0.0615869	-0.0838568
119.6	-0.150658	0.0344891	-0.0879264	-0.0847996
119.7	-0.135564	0.0667388	-0.115897	-0.0843345
119.8	-0.120491	0.0989108	-0.145077	-0.082357
119.9	-0.10585	0.130609	-0.174959	-0.0787925
120	-0.0921027	0.161478	-0.205021	-0.0736168
120.1	-0.0795823	0.191181	-0.234695	-0.066803
120.2	-0.0686206	0.219446	-0.263397	-0.0583803
120.3	-0.0594577	0.246003	-0.290579	-0.0483785
120.4	-0.0523034	0.270682	-0.315714	-0.0368889
120.5	-0.0472783	0.293306	-0.338331	-0.0239727
120.6	-0.0444932	0.313804	-0.358011	-0.00978674
120.7	-0.0439001	0.332099	-0.37443	0.00556147
120.8	-0.0454771	0.348198	-0.387401	0.0218681
120.9	-0.0491048	0.362087	-0.396782	0.0389956
121	-0.0546462	0.373801	-0.40258	0.0567029
121.1	-0.0618806	0.383358	-0.404872	0.0748191
121.2	-0.0705876	0.390808	-0.403874	0.0931014
121.3	-0.0805302	0.396176	-0.399875	0.111356
121.4	-0.0914841	0.399485	-0.393274	0.129355
121.5	-0.103204	0.400749	-0.38453	0.146913
121.6	-0.115483	0.399967	-0.374123	0.163839
121.7	-0.128098	0.397125	-0.362563	0.180021
121.8	-0.140879	0.392175	-0.350388	0.195346
121.9	-0.153606	0.385129	-0.33813	0.209747
122	-0.166113	0.375907	-0.32628	0.223156
122.1	-0.178235	0.364521	-0.315271	0.235555
122.2	-0.189807	0.35097	-0.305477	0.246956
122.3	-0.200701	0.335301	-0.297179	0.25737
122.4	-0.210794	0.317591	-0.290576	0.266848
122.5	-0.219937	0.297961	-0.285778	0.275398
122.6	-0.22799	0.276598	-0.282786	0.28305
122.7	-0.234823	0.253723	-0.281552	0.289791
122.8	-0.240291	0.229576	-0.281909	0.295599
122.9	-0.24427	0.204489	-0.28365	0.300422
123	-0.246631	0.178824	-0.286481	0.304165
123.1	-0.247263	0.152957	-0.290096	0.306724
123.2	-0.246035	0.127323	-0.294111	0.307993
123.3	-0.24288	0.102339	-0.298197	0.307804
123.4	-0.23775	0.0784472	-0.30198	0.306055
123.5	-0.230624	0.0561009	-0.305153	0.302614
123.6	-0.221481	0.0356927	-0.307398	0.297419
123.7	-0.210365	0.0175839	-0.308447	0.290388
123.8	-0.197326	0.00211822	-0.308096	0.281562
123.9	-0.182464	-0.0104389	-0.30617	0.271004
124	-0.165896	-0.0198652	-0.302604	0.258807
124.1	-0.147773	-0.0260409	-0.297333	0.245162
124.2	-0.128283	-0.0288805	-0.290367	0.230277
124.3	-0.107625	-0.0283901	-0.281731	0.214392
124.4	-0.0860049	-0.0246437	-0.271556	0.197801
124.5	-0.0636716	-0.017774	-0.259919	0.180764
124.6	-0.0408737	-0.00798713	-0.247055	0.163627
124.7	-0.0178257	0.00448261	-0.233137	0.146629
124.8	0.0051917	0.0193384	-0.218399	0.130013
124.9	0.0279583	0.0362573	-0.203043	0.113974
125	0.0502134	0.0549056	-0.187333	0.0986551
125.1	0.07175	0.0749748	-0.171475	0.084122
125.2	0.092347	0.0960916	-0.15573	0.0704074
125.3	0.111811	0.117944	-0.140313	0.0574655
125.4	0.129979	0.140192	-0.125421	0.045189
125.5	0.146706	0.162567	-0.111252	0.0334691
125.6	0.161898	0.184815	-0.0979648	0.0221399
125.7	0.175491	0.20672	-0.0856965	0.0110529
125.8	0.187461	0.228077	-0.0745475	3.31124e-05
125.9	0.197832	0.24872	-0.0646401	-0.0110527
126	0.206643	0.26851	-0.056012	-0.0222901
126.1	0.213981	0.287317	-0.0487162	-0.0337816
126.2	0.219964	0.305033	-0.0427683	-0.0455003
126.3	0.224691	0.321547	-0.0381393	-0.0574502
126.4	0.228317	0.336785	-0.0347693	-0.0694979
126.5	0.231001	0.350652	-0.0325999	-0.0815129
126.6	0.232871	0.363055	-0.0315313	-0.0932807
126.7	0.234055	0.373948	-0.0314495	-0.104562
126.8	0.234661	0.38326	-0.0322519	-0.115116
126.9	0.234744	0.390949	-0.0337428	-0.124661
127	0.234377	0.397006	-0.0357938	-0.132946
127.1	0.233569	0.401399	-0.0382171	-0.139696
127.2	0.232328	0.404159	-0.0408418	-0.144722
127.3	0.230583	0.405307	-0.0434761	-0.147822
127.4	0.228289	0.404927	-0.0459856	-0.148853
127.5	0.225335	0.403064	-0.0482087	-0.147736
127.6	0.221637	0.399815	-0.0500126	-0.144452
127.7	0.217096	0.395297	-0.0512843	-0.139019
127.8	0.211621	0.38964	-0.0519463	-0.13151
127.9	0.205161	0.382993	-0.0519273	-0.122035
128	0.197677	0.375486	-0.0511985	-0.110749
128.1	0.189157	0.367282	-0.0497632	-0.0978568
128.2	0.179697	0.358512	-0.0476589	-0.0835487
128.3	0.169356	0.349319	-0.0449375	-0.068096
128.4	0.158348	0.33983	-0.0417271	-0.0516956
128.5	0.146865	0.330193	-0.0380941	-0.0346051
128.6	0.135179	0.320528	-0.0341663	-0.0170581
128.7	0.123551	0.31094	-0.0301004	0.000727275
128.8	0.112305	0.301531	-0.0260341	0.0185552
128.9	0.101784	0.292382	-0.0221441	0.0362451
129	0.0922979	0.283592	-0.0185981	0.0536343
129.1	0.0841764	0.275212	-0.0155388	0.070566
129.2	0.0776848	0.267318	-0.0131426	0.0869075
129.3	0.0730527	0.259944	-0.0115507	0.102535
129.4	0.0704749	0.25315	-0.0109326	0.117359
129.5	0.0700944	0.246935	-0.0114401	0.131297
129.6	0.0719778	0.241358	-0.0131724	0.144281
129.7	0.0760972	0.236387	-0.0162123	0.156237
129.8	0.0823481	0.232043	-0.0206119	0.167131
129.9	0.0905851	0.228295	-0.0264188	0.176911
130	0.100578	0.225148	-0.0335737	0.185537
130.1	0.11209	0.222537	-0.042034	0.193
130.2	0.124838	0.22044	-0.0516515	0.199283
130.3	0.138535	0.218805	-0.062295	0.204339
130.4	0.152868	0.217616	-0.0737357	0.208152
130.5	0.167536	0.216813	-0.0857239	0.210697
130.6	0.182276	0.216376	-0.0979957	0.211976
130.7	0.19684	0.216262	-0.110226	0.211988
130.8	0.21103	0.216414	-0.122095	0.210767
130.9	0.224707	0.216795	-0.133295	0.208359
131	0.237755	0.217353	-0.14353	0.20481
131.1	0.250096	0.218044	-0.15257	0.200221
131.2	0.261678	0.218819	-0.160217	0.194711
131.3	0.272509	0.219601	-0.166343	0.188448
131.4	0.28259	0.220334	-0.170859	0.181583
131.5	0.291964	0.220949	-0.173769	0.174375
131.6	0.300579	0.221374	-0.175135	0.167033
131.7	0.308446	0.221536	-0.175092	0.159861
131.8	0.315457	0.221362	-0.173821	0.153086
131.9	0.321562	0.220777	-0.17151	0.147036
132	0.326567	0.219735	-0.168404	0.141956
132.1	0.330329	0.218174	-0.16475	0.138124
132.2	0.332595	0.216077	-0.160799	0.135751
132.3	0.333149	0.213428	-0.156775	0.13506
132.4	0.331692	0.210249	-0.152865	0.136137
132.5	0.327992	0.206552	-0.149223	0.139058
132.6	0.321773	0.202383	-0.145938	0.143785
132.7	0.312847	0.1978	-0.143072	0.150262
132.8	0.301029	0.192868	-0.140643	0.158294
132.9	0.286238	0.187671	-0.138624	0.167682
133	0.268433	0.18228	-0.136976	0.178127
133.1	0.247701	0.176771	-0.135641	0.189293
133.2	0.224169	0.171199	-0.134533	0.200823
133.3	0.198069	0.165614	-0.133593	0.212328
133.4	0.169718	0.160032	-0.132739	0.223397
133.5	0.139453	0.15443	-0.131936	0.233656
133.6	0.107652	0.148754	-0.13113	0.242737
133.7	0.0747587	0.142958	-0.13028	0.25037
133.8	0.0411942	0.136966	-0.129394	0.256259
133.9	0.00742873	0.130708	-0.128442	0.260247
134	-0.0261488	0.124055	-0.127425	0.262205
134.1	-0.0591486	0.116919	-0.126327	0.262129
134.2	-0.091212	0.109188	-0.125114	0.259991
134.3	-0.122062	0.100786	-0.123753	0.255892
134.4	-0.151422	0.0916347	-0.122158	0.249916
134.5	-0.179112	0.0816999	-0.120238	0.242267
134.6	-0.204962	0.0709281	-0.117882	0.233103
134.7	-0.228845	0.059371	-0.114916	0.222645
134.8	-0.250675	0.0470471	-0.111211	0.21112
134.9	-0.270415	0.0340714	-0.106572	0.198701
135	-0.288028	0.020543	-0.10082	0.185564
135.1	-0.30353	0.00662791	-0.0937743	0.171851
135.2	-0.316888	-0.00750073	-0.0852649	0.157685
135.3	-0.328165	-0.0216164	-0.0751913	0.143122
135.4	-0.33743	-0.0354831	-0.0634363	0.128206
135.5	-0.344759	-0.0488311	-0.0499445	0.112896
135.6	-0.350288	-0.0614091	-0.034697	0.0971622
135.7	-0.354114	-0.0729459	-0.0177568	0.0809409
135.8	-0.356432	-0.083177	0.000783762	0.0641286
135.9	-0.357409	-0.0918583	0.0207005	0.0466539
136	-0.357303	-0.0987575	0.0417886	0.0284295
136.1	-0.356328	-0.10368	0.063698	0.00939578
136.2	-0.354778	-0.106438	0.0861078	-0.010484
136.3	-0.352918	-0.106921	0.108617	-0.0312412
136.4	-0.351052	-0.105023	0.130767	-0.0528261
136.5	-0.349438	-0.100714	0.152049	-0.0751843
136.6	-0.348361	-0.0939995	0.171971	-0.0981934
136.7	-0.348026	-0.0849523	0.189988	-0.121693
136.8	-0.348658	-0.0736744	0.205634	-0.145496
136.9	-0.350449	-0.0603122	0.218375	-0.169381
137	-0.353538	-0.0450754	0.227805	-0.193035
137.1	-0.358009	-0.0281985	0.233497	-0.216171
137.2	-0.363894	-0.00994151	0.235184	-0.238454
137.3	-0.371196	0.00937781	0.232603	-0.259544
137.4	-0.379902	0.0294719	0.225677	-0.279129
137.5	-0.389918	0.0499862	0.214351	-0.296861
137.6	-0.401103	0.0705836	0.198734	-0.312419
137.7	-0.413276	0.0909171	0.179016	-0.325499
137.8	-0.42622	0.110666	0.155506	-0.335834
137.9	-0.439659	0.129502	0.1286	-0.343167
138	-0.453343	0.147133	0.098796	-0.347362
138.1	-0.46694	0.16326	0.0666144	-0.348243
138.2	-0.480123	0.17762	0.0326966	-0.345756
138.3	-0.492535	0.189979	-0.00232677	-0.339895
138.4	-0.503806	0.200124	-0.0378042	-0.330713
138.5	-0.513603	0.207907	-0.0730833	-0.318332
138.6	-0.521544	0.213206	-0.107541	-0.302923
138.7	-0.527294	0.215983	-0.140624	-0.284739
138.8	-0.530524	0.216234	-0.171805	-0.264082
138.9	-0.530975	0.214025	-0.200692	-0.241295
139	-0.528418	0.209483	-0.226921	-0.216764
139.1	-0.522677	0.202794	-0.250213	-0.190903
139.2	-0.51363	0.1942	-0.27041	-0.164163
139.3	-0.501268	0.184022	-0.287395	-0.136966
139.4	-0.485588	0.172602	-0.301199	-0.109716
139.5	-0.466748	0.160322	-0.311854	-0.0828048
139.6	-0.444855	0.147597	-0.319537	-0.0565689
139.7	-0.420199	0.134875	-0.324431	-0.0312986
139.8	-0.393053	0.122591	-0.32681	-0.0072664
139.9	-0.363812	0.111173	-0.326949	0.0153399
140	-0.332876	0.101023	-0.325155	0.0363688
140.1	-0.300695	0.0924792	-0.321732	0.0557398
140.2	-0.267709	0.0858618	-0.316971	0.0734343
140.3	-0.234382	0.0813774	-0.311189	0.0894674
140.4	-0.201148	0.0791995	-0.304621	0.103866
140.5	-0.16844	0.0794064	-0.297527	0.116689
140.6	-0.136587	0.0820343	-0.290075	0.128039
140.7	-0.105945	0.086981	-0.282456	0.138005
140.8	-0.0767454	0.0941196	-0.274797	0.146696
140.9	-0.0492144	0.103227	-0.267183	0.154213
141	-0.0234116	0.114056	-0.259694	0.160651
141.1	0.000572648	0.126301	-0.252352	0.166108
141.2	0.0228173	0.139652	-0.245158	0.170665
141.3	0.0433707	0.153737	-0.238116	0.174414
141.4	0.0624196	0.168237	-0.231205	0.177442
141.5	0.0801201	0.182816	-0.22442	0.179806
141.6	0.0966806	0.197187	-0.21775	0.181601
141.7	0.112318	0.211075	-0.211234	0.182875
141.8	0.127194	0.224246	-0.204859	0.183723
141.9	0.141457	0.236532	-0.198651	0.184195
142	0.155186	0.247817	-0.192619	0.184371
142.1	0.1684	0.258067	-0.18678	0.184298
142.2	0.181059	0.267298	-0.181141	0.18405
142.3	0.193037	0.275563	-0.175692	0.183688
142.4	0.204119	0.282965	-0.170423	0.183278
142.5	0.21402	0.28967	-0.16528	0.182826
142.6	0.222412	0.295811	-0.160176	0.182375
142.7	0.228885	0.301601	-0.155004	0.181944
142.8	0.233022	0.307217	-0.149658	0.181558
142.9	0.234411	0.31286	-0.143972	0.181214
143	0.232618	0.318721	-0.137802	0.180908
143.1	0.227315	0.324937	-0.130977	0.180641
143.2	0.21815	0.331641	-0.123323	0.180414
143.3	0.204936	0.338898	-0.114668	0.180232
143.4	0.187535	0.346707	-0.104903	0.18016
143.5	0.165941	0.355028	-0.0939354	0.18021
143.6	0.140248	0.363771	-0.0817408	0.180425
143.7	0.110638	0.372775	-0.068299	0.180846
143.8	0.0774267	0.381833	-0.0536955	0.181541
143.9	0.0410506	0.390724	-0.0380755	0.182549
144	0.00198781	0.399174	-0.0216503	0.183942
144.1	-0.0391966	0.406903	-0.00467445	0.185784
144.2	-0.0818839	0.413603	0.0125048	0.188097
144.3	-0.125422	0.419006	0.0295603	0.190914
144.4	-0.169163	0.422845	0.0460643	0.194259
144.5	-0.21248	0.424902	0.0616615	0.198129
144.6	-0.254754	0.425046	0.0759491	0.202466
144.7	-0.295453	0.423184	0.0885629	0.207196
144.8	-0.334055	0.419313	0.0991674	0.21222
144.9	-0.370161	0.413502	0.107502	0.21741
145	-0.403397	0.40589	0.113349	0.22261
145.1	-0.433518	0.396699	0.116554	0.227636
145.2	-0.460315	0.386222	0.117048	0.232303
145.3	-0.483654	0.374769	0.114818	0.236397
145.4	-0.503482	0.362673	0.109931	0.239723
145.5	-0.519832	0.350307	0.102471	0.242087
145.6	-0.532777	0.338009	0.0926204	0.243337
145.7	-0.542413	0.326123	0.0805562	0.243334
145.8	-0.548911	0.314908	0.0665086	0.241999
145.9	-0.552483	0.304575	0.0507045	0.239277
146	-0.553347	0.295267	0.0333477	0.235177
146.1	-0.551721	0.287078	0.0146699	0.22973
146.2	-0.547846	0.279992	-0.0051514	0.223085
146.3	-0.541933	0.273957	-0.0259534	0.215405
146.4	-0.534178	0.268838	-0.0476041	0.206907
146.5	-0.524764	0.264467	-0.0699811	0.197825
146.6	-0.513887	0.260578	-0.0930027	0.188438
146.7	-0.501656	0.256943	-0.116547	0.179023
146.8	-0.488205	0.253318	-0.140522	0.169875
146.9	-0.473582	0.249433	-0.164822	0.161304
147	-0.457841	0.245083	-0.189329	0.15357
147.1	-0.440965	0.240064	-0.213886	0.14694
147.2	-0.422942	0.234229	-0.238355	0.141579
147.3	-0.403748	0.22745	-0.262523	0.137687
147.4	-0.383347	0.219685	-0.286206	0.135336
147.5	-0.36169	0.210915	-0.309137	0.134581
147.6	-0.338752	0.201188	-0.331053	0.135394
147.7	-0.314488	0.190582	-0.351682	0.137717
147.8	-0.288873	0.179233	-0.370775	0.141451
147.9	-0.261903	0.167306	-0.38811	0.146403
148	-0.233597	0.155007	-0.403458	0.152392
148.1	-0.204022	0.142549	-0.416648	0.159136
148.2	-0.17326	0.130175	-0.427559	0.166395
148.3	-0.141439	0.118132	-0.436091	0.173862
148.4	-0.108712	0.106661	-0.442252	0.181228
148.5	-0.0752707	0.0960053	-0.446072	0.188189
148.6	-0.0413413	0.0863911	-0.447622	0.194428
148.7	-0.00718341	0.077996	-0.447043	0.19963
148.8	0.0269252	0.0709937	-0.444472	0.203513
148.9	0.0606874	0.065541	-0.440118	0.205779
149	0.0937582	0.0617452	-0.434177	0.20622
149.1	0.125771	0.05966	-0.426895	0.204624
149.2	0.15632	0.0593083	-0.418484	0.200863
149.3	0.185012	0.0606741	-0.409154	0.19482
149.4	0.211406	0.0636893	-0.399109	0.186476
149.5	0.2351	0.068243	-0.38851	0.175852
149.6	0.255691	0.0741789	-0.377474	0.16302
149.7	0.272799	0.0813325	-0.366073	0.14816
149.8	0.286066	0.0895185	-0.354364	0.131502
149.9	0.295181	0.098523	-0.342405	0.113359
150	0.299896	0.108166	-0.330232	0.094071
150.1	0.300055	0.118234	-0.317825	0.0740681
150.2	0.295547	0.128595	-0.305202	0.0537789
150.3	0.286414	0.139082	-0.292346	0.0337231
150.4	0.272771	0.149597	-0.27929	0.0144018
150.5	0.254885	0.160083	-0.266059	-0.00365215
150.6	0.233096	0.170515	-0.252689	-0.0199287
150.7	0.207902	0.180896	-0.23927	-0.0339329
150.8	0.179877	0.191271	-0.225891	-0.0452282
150.9	0.149702	0.201725	-0.212673	-0.0534309
151	0.11807	0.212311	-0.199743	-0.0581852
151.1	0.0857675	0.223145	-0.187214	-0.0592852
151.2	0.053599	0.234281	-0.175215	-0.0566039
151.3	0.0223302	0.245819	-0.163845	-0.0501256
151.4	-0.00724616	0.257772	-0.153224	-0.039965
151.5	-0.034482	0.270143	-0.143416	-0.0263402
151.6	-0.0587179	0.282877	-0.134464	-0.00958048
151.7	-0.0794628	0.295875	-0.1264	0.00985768
151.8	-0.0963295	0.308949	-0.119191	0.0314386
151.9	-0.109065	0.321905	-0.112793	0.0545193
152	-0.117527	0.334435	-0.107123	0.0784098
152.1	-0.121781	0.346275	-0.102109	0.102352
152.2	-0.121925	0.357084	-0.0976922	0.12562
152.3	-0.11828	0.36653	-0.0938145	0.147476
152.4	-0.11119	0.374258	-0.0903973	0.167226
152.5	-0.101101	0.37994	-0.0874347	0.184248
152.6	-0.0885025	0.383275	-0.0848769	0.197995
152.7	-0.0739553	0.384008	-0.0827716	0.208053
152.8	-0.0580201	0.381978	-0.0811409	0.214093
152.9	-0.041286	0.37704	-0.0800902	0.215965
153	-0.0242981	0.369192	-0.0796913	0.213619
153.1	-0.00757486	0.358447	-0.0800233	0.207192
153.2	0.00840833	0.34497	-0.0812103	0.196916
153.3	0.0232045	0.328966	-0.0833111	0.183125
153.4	0.0364665	0.310758	-0.0864066	0.166259
153.5	0.0478875	0.290678	-0.0904866	0.146824
153.6	0.0572264	0.269148	-0.0955516	0.125393
153.7	0.0642912	0.246604	-0.101506	0.102531
153.8	0.0689887	0.22359	-0.108269	0.0788491
153.9	0.0712409	0.200577	-0.115666	0.0549201
154	0.071048	0.178097	-0.123519	0.0312947
154.1	0.0684304	0.156641	-0.131599	0.00844505
154.2	0.0634785	0.136671	-0.139679	-0.0132065
154.3	0.0563042	0.118638	-0.147488	-0.0333027
154.4	0.0470886	0.10292	-0.154785	-0.0515612
154.5	0.0360595	0.0898775	-0.161328	-0.0677611
154.6	0.023475	0.0798076	-0.166914	-0.08177
154.7	0.00961135	0.0728967	-0.171414	-0.0935003
154.8	-0.00522767	0.0693376	-0.174679	-0.102939
154.9	-0.0207163	0.0691702	-0.176676	-0.110115
155	-0.0365203	0.072436	-0.177366	-0.115076
155.1	-0.0522809	0.0790743	-0.176771	-0.11792
155.2	-0.0676835	0.0889322	-0.174954	-0.118777
155.3	-0.0823742	0.101851	-0.172033	-0.11776
155.4	-0.0960906	0.117519	-0.168123	-0.11503
155.5	-0.108532	0.135624	-0.163414	-0.110729
155.6	-0.119503	0.155778	-0.158041	-0.105027
155.7	-0.128782	0.177532	-0.152179	-0.0981049
155.8	-0.136228	0.200418	-0.14596	-0.0901541
155.9	-0.141749	0.223954	-0.139517	-0.0813631
156	-0.1453	0.247595	-0.133001	-0.0719259
156.1	-0.146901	0.270823	-0.1265	-0.0620686
156.2	-0.146589	0.293077	-0.120089	-0.0519819
156.3	-0.144475	0.313867	-0.113833	-0.0418513
156.4	-0.140652	0.332685	-0.107748	-0.031907
156.5	-0.135272	0.349094	-0.101865	-0.0222723
156.6	-0.128487	0.362672	-0.0961942	-0.0131539
156.7	-0.120523	0.373083	-0.0907357	-0.00461709
156.8	-0.11156	0.380014	-0.0855339	0.00321161
156.9	-0.101866	0.383259	-0.0805862	0.0103196
157	-0.091626	0.382639	-0.0759523	0.0166799
157.1	-0.0810897	0.378126	-0.0716544	0.0223457
157.2	-0.0704866	0.369717	-0.0677916	0.0274202
157.3	-0.060077	0.357518	-0.0644341	0.0320545
157.4	-0.0501219	0.341741	-0.0617111	0.0364809
157.5	-0.0408579	0.322675	-0.0597216	0.0408968
157.6	-0.0325178	0.300718	-0.0586062	0.0455984
157.7	-0.025308	0.276324	-0.0584582	0.050845
157.8	-0.019414	0.250028	-0.0594228	0.0569001
157.9	-0.014992	0.222412	-0.0615588	0.0640646
158	-0.0121732	0.194091	-0.0649132	0.0725821
158.1	-0.0110259	0.165713	-0.0694658	0.0826534
158.2	-0.0115817	0.137925	-0.075198	0.0944239
158.3	-0.0138654	0.111374	-0.0820024	0.107988
158.4	-0.0178192	0.0866369	-0.0897314	0.123342
158.5	-0.023337	0.0642405	-0.0981871	0.140457
158.6	-0.030289	0.0446276	-0.10711	0.159148
158.7	-0.038479	0.0281198	-0.11623	0.179215
158.8	-0.0477114	0.0149323	-0.125255	0.200323
158.9	-0.0577016	0.00516453	-0.133857	0.222158
159	-0.0682312	-0.00122829	-0.141768	0.244261
159.1	-0.0790215	-0.00438965	-0.148678	0.266179
159.2	-0.0898449	-0.00458397	-0.154389	0.287432
159.3	-0.100477	-0.00218056	-0.158705	0.307519
159.4	-0.110705	0.00238973	-0.161504	0.325965
159.5	-0.120352	0.00862104	-0.162742	0.342298
159.6	-0.129264	0.0159812	-0.162426	0.35611
159.7	-0.137293	0.0239314	-0.160692	0.367032
159.8	-0.144357	0.0319568	-0.157701	0.374817
159.9	-0.150363	0.0395698	-0.15369	0.379235
160	-0.155293	0.0463303	-0.148929	0.380185
160.1	-0.159082	0.0518585	-0.143717	0.377632
160.2	-0.161751	0.0558504	-0.138393	0.371662
160.3	-0.163277	0.0581024	-0.133296	0.362407
160.4	-0.163694	0.0584919	-0.12876	0.350129
160.5	-0.163015	0.0569797	-0.125097	0.335117
160.6	-0.161281	0.0535759	-0.122596	0.317752
160.7	-0.158495	0.0484205	-0.121507	0.298418
160.8	-0.154726	0.0416433	-0.122	0.277552
160.9	-0.14997	0.0335039	-0.124262	0.255584
161	-0.144303	0.0242643	-0.128353	0.232956
161.1	-0.137779	0.0142139	-0.134339	0.210039
161.2	-0.130471	0.00365617	-0.142177	0.187197
161.3	-0.122436	-0.00704611	-0.151836	0.164691
161.4	-0.113783	-0.0175618	-0.163202	0.142807
161.5	-0.104625	-0.0275835	-0.176162	0.121678
161.6	-0.0950725	-0.0368226	-0.190515	0.101437
161.7	-0.0852419	-0.0450407	-0.206048	0.0821259
161.8	-0.0752618	-0.0520273	-0.222494	0.0637282
161.9	-0.0652312	-0.0576659	-0.239571	0.0461942
162	-0.0552848	-0.0618487	-0.256941	0.0293978
162.1	-0.0454969	-0.0645573	-0.274268	0.0132557
162.2	-0.0359642	-0.0658553	-0.291179	-0.00239091
162.3	-0.0267559	-0.0658595	-0.307275	-0.0176438
162.4	-0.0179409	-0.0647691	-0.322163	-0.0326257
162.5	-0.00957007	-0.0628243	-0.335457	-0.0474283
162.6	-0.00167002	-0.060347	-0.346764	-0.0620767
162.7	0.0057883	-0.0576712	-0.355695	-0.0765902
162.8	0.0128064	-0.0551418	-0.361895	-0.0909435
162.9	0.0194458	-0.0531049	-0.365048	-0.105074
163	0.0257571	-0.0519399	-0.364904	-0.118891
163.1	0.0318009	-0.0519295	-0.36127	-0.132258
163.2	0.0376348	-0.0533719	-0.354031	-0.145018
163.3	0.0433309	-0.0564529	-0.343141	-0.156992
163.4	0.0489656	-0.061329	-0.32867	-0.167998
163.5	0.0546091	-0.0680332	-0.310724	-0.177843
163.6	0.0603486	-0.0765695	-0.289544	-0.186352
163.7	0.066228	-0.0868199	-0.26542	-0.193345
163.8	0.0723065	-0.0985678	-0.238742	-0.198692
163.9	0.0786553	-0.111565	-0.209953	-0.202225
164	0.0853572	-0.125445	-0.179594	-0.203883
164.1	0.0924631	-0.139808	-0.148176	-0.20357
164.2	0.100057	-0.154213	-0.116294	-0.201278
164.3	0.108199	-0.168202	-0.0845429	-0.196956
164.4	0.117006	-0.181315	-0.0534765	-0.190598
164.5	0.12652	-0.193104	-0.0236641	-0.182264
164.6	0.136855	-0.203142	0.00438586	-0.172006
164.7	0.148062	-0.211073	0.0302562	-0.159913
164.8	0.160181	-0.216578	0.0535827	-0.146043
164.9	0.173267	-0.219444	0.0740765	-0.130521
165	0.187274	-0.219492	0.0915502	-0.113465
165.1	0.202207	-0.216664	0.105889	-0.0950059
165.2	0.217949	-0.210965	0.117083	-0.0752941
165.3	0.234411	-0.202508	0.125189	-0.0544961
165.4	0.251335	-0.191479	0.130377	-0.0328009
165.5	0.268531	-0.178155	0.13284	-0.0104355
165.6	0.285652	-0.162871	0.132892	0.0123688
165.7	0.302379	-0.146032	0.130826	0.0353127
165.8	0.318308	-0.128069	0.126986	0.0581393
165.9	0.333063	-0.109454	0.121741	0.0804864
166	0.346202	-0.0906969	0.11545	0.102019
166.1	0.357315	-0.0723326	0.108459	0.122389
166.2	0.36602	-0.0548559	0.101094	0.141184
166.3	0.371966	-0.0387619	0.0936642	0.158046
166.4	0.374881	-0.0245298	0.0863902	0.172568
166.5	0.374479	-0.0126061	0.0794933	0.184422
166.6	0.370633	-0.00337753	0.0731333	0.193288
166.7	0.363217	0.00279646	0.0674247	0.198908
166.8	0.352264	0.00563315	0.0624412	0.201096
166.9	0.337852	0.00488677	0.0581763	0.199723
167	0.320207	0.000432144	0.0545979	0.194808
167.1	0.299541	-0.00778526	0.0516312	0.186408
167.2	0.276208	-0.0197718	0.0491557	0.174693
167.3	0.250605	-0.0354049	0.0470516	0.159942
167.4	0.22318	-0.0544613	0.0451726	0.142518
167.5	0.194378	-0.0766294	0.0433419	0.122862
167.6	0.164733	-0.101553	0.0413578	0.101481
167.7	0.134722	-0.128755	0.0390468	0.0789413
167.8	0.104841	-0.157726	0.0362284	0.0558211
167.9	0.0755816	-0.187877	0.0327075	0.0327286
168	0.0473943	-0.218597	0.0283372	0.0102232
168.1	0.0207085	-0.249222	0.022987	-0.0111497
168.2	-0.00411764	-0.279114	0.0165709	-0.0309182
168.3	-0.0267582	-0.307629	0.00905048	-0.0486523
168.4	-0.0469628	-0.334147	0.000418722	-0.0640631
168.5	-0.0645301	-0.358069	-0.00927096	-0.0768964
168.6	-0.0793427	-0.378907	-0.0199066	-0.0870716
168.7	-0.0913123	-0.396172	-0.0313607	-0.0945905
168.8	-0.100423	-0.409491	-0.0433641	-0.0995703
168.9	-0.106682	-0.418551	-0.0556815	-0.102216
169	-0.110155	-0.423139	-0.0680009	-0.102816
169.1	-0.110946	-0.423106	-0.0799911	-0.101704
169.2	-0.109147	-0.418427	-0.0913081	-0.0992598
169.3	-0.10497	-0.409151	-0.101586	-0.095922
169.4	-0.0985298	-0.395429	-0.110466	-0.0921135
169.5	-0.0900295	-0.377449	-0.117667	-0.088265
169.6	-0.0796334	-0.355515	-0.122886	-0.0847069
169.7	-0.0675604	-0.329982	-0.125984	-0.0817911
169.8	-0.0540161	-0.301264	-0.12679	-0.0797437
169.9	-0.039175	-0.269866	-0.125247	-0.0787957
170	-0.0232444	-0.236321	-0.121419	-0.079047
170.1	-0.00641297	-0.2012	-0.115406	-0.0805847
170.2	0.011135	-0.165114	-0.10745	-0.0834073
170.3	0.0291968	-0.128704	-0.0978244	-0.0874564
170.4	0.0476136	-0.0925625	-0.0869155	-0.0926322
170.5	0.0661824	-0.057315	-0.0751311	-0.0988484
170.6	0.0847581	-0.0235294	-0.0629218	-0.105934
170.7	0.103164	0.00822568	-0.0507787	-0.113768
170.8	0.121268	0.0374794	-0.0391698	-0.122196
170.9	0.138913	0.0637897	-0.028519	-0.131071
171	0.155988	0.086837	-0.0192173	-0.140262
171.1	0.172376	0.106349	-0.0115859	-0.149683
171.2	0.18798	0.122184	-0.00584644	-0.159236
171.3	0.202733	0.134241	-0.00214864	-0.16881
171.4	0.216567	0.142586	-0.000553144	-0.178296
171.5	0.229405	0.147303	-0.00100127	-0.187616
171.6	0.241199	0.148642	-0.00335327	-0.196646
171.7	0.251916	0.146839	-0.00736753	-0.205283
171.8	0.261527	0.14226	-0.012737	-0.213393
171.9	0.270008	0.135273	-0.0190843	-0.220846
172	0.277324	0.126282	-0.0259903	-0.227471
172.1	0.283506	0.1157	-0.0330431	-0.23308
172.2	0.288529	0.103943	-0.0398236	-0.237485
172.3	0.292408	0.0914151	-0.0459733	-0.240509
172.4	0.295182	0.0784837	-0.0511423	-0.241937
172.5	0.296879	0.0654412	-0.0550944	-0.241609
172.6	0.297529	0.0525809	-0.0576368	-0.239361
172.7	0.297227	0.0401159	-0.0586807	-0.235075
172.8	0.296057	0.0282202	-0.0582576	-0.228663
172.9	0.294101	0.0170129	-0.0564523	-0.220087
173	0.291457	0.00655003	-0.0534512	-0.20937
173.1	0.288213	-0.00311164	-0.0494761	-0.19658
173.2	0.284471	-0.0119875	-0.0448554	-0.181852
173.3	0.280324	-0.0200671	-0.0398854	-0.165363
173.4	0.275898	-0.0273992	-0.03495	-0.147338
173.5	0.271228	-0.0339697	-0.0303654	-0.128057
173.6	0.266388	-0.039825	-0.0264724	-0.107871
173.7	0.261422	-0.0449657	-0.0235231	-0.087146
173.8	0.25633	-0.0494317	-0.0217294	-0.0663281
173.9	0.25111	-0.053224	-0.0212369	-0.0458104
174	0.245707	-0.0563534	-0.0221054	-0.0260451
174.1	0.24008	-0.0587628	-0.0243507	-0.00747458
174.2	0.23411	-0.0604743	-0.0278424	0.00950992
174.3	0.227713	-0.0614571	-0.0324452	0.024491
174.4	0.220721	-0.0617157	-0.0379163	0.037118
174.5	0.212995	-0.0612188	-0.0439891	0.0470728
174.6	0.20437	-0.0599925	-0.050347	0.0540713
174.7	0.194706	-0.0579909	-0.0567041	0.0579034
174.8	0.183813	-0.0552436	-0.062741	0.0584075
174.9	0.171533	-0.0517373	-0.0681757	0.055474
175	0.157711	-0.0474849	-0.0727487	0.0490722
175.1	0.142233	-0.0425183	-0.0762811	0.0392143
175.2	0.125041	-0.0368506	-0.0786041	0.025996
175.3	0.106092	-0.0304853	-0.0796519	0.00957069
175.4	0.0854005	-0.023438	-0.0794209	-0.00984815
175.5	0.0630354	-0.015716	-0.0779507	-0.0319793
175.6	0.0391372	-0.00731986	-0.0753637	-0.0564906
175.7	0.0138822	0.00171536	-0.0717653	-0.0829955
175.8	-0.0124649	0.0114112	-0.067412	-0.111053
175.9	-0.039627	0.0217027	-0.0625124	-0.140142
176	-0.067274	0.0325381	-0.0573462	-0.169711
176.1	-0.0950355	0.0438379	-0.0521764	-0.199182
176.2	-0.122509	0.0555036	-0.047273	-0.227973
176.3	-0.149319	0.0673897	-0.0428987	-0.255455
176.4	-0.17503	0.0793178	-0.0392946	-0.281024
176.5	-0.199279	0.0911115	-0.0366635	-0.304122
176.6	-0.221698	0.102541	-0.0352091	-0.324174
176.7	-0.241951	0.113364	-0.0350364	-0.340734
176.8	-0.259748	0.123331	-0.0362826	-0.353421
176.9	-0.274874	0.132177	-0.0389798	-0.361952
177	-0.287154	0.139641	-0.0431865	-0.366176
177.1	-0.296457	0.145482	-0.0488403	-0.366035
177.2	-0.302703	0.149493	-0.0559235	-0.361605
177.3	-0.305866	0.151491	-0.0643189	-0.353066
177.4	-0.306001	0.151317	-0.0739428	-0.340759
177.5	-0.303175	0.148888	-0.0846022	-0.325087
177.6	-0.297497	0.144149	-0.0961553	-0.306597
177.7	-0.289165	0.137113	-0.108394	-0.285848
177.8	-0.278407	0.127841	-0.121093	-0.263479
177.9	-0.265471	0.116489	-0.134031	-0.240109
178	-0.250714	0.103275	-0.146959	-0.216385
178.1	-0.234453	0.0884348	-0.1596	-0.192889
178.2	-0.217101	0.0723138	-0.171693	-0.170168
178.3	-0.199055	0.0552416	-0.18297	-0.148695
178.4	-0.180766	0.0376116	-0.193195	-0.128855
178.5	-0.162698	0.0198691	-0.202109	-0.110949
178.6	-0.145321	0.00242959	-0.209513	-0.0951478
178.7	-0.129095	-0.0142616	-0.215174	-0.0815907
178.8	-0.114511	-0.0297567	-0.21894	-0.0702357
178.9	-0.101971	-0.0436355	-0.220662	-0.0610226
179	-0.0919155	-0.0555233	-0.220222	-0.0537738
179.1	-0.0846621	-0.0650687	-0.217543	-0.0483149
179.2	-0.0805143	-0.0720105	-0.212583	-0.0443583
179.3	-0.0797103	-0.0761227	-0.205391	-0.0416877
179.4	-0.0823974	-0.0772993	-0.195965	-0.0400357
179.5	-0.0886712	-0.075501	-0.18442	-0.0391242
179.6	-0.0984979	-0.070768	-0.170861	-0.0387679
179.7	-0.111837	-0.0632261	-0.155473	-0.0387633
179.8	-0.128512	-0.0530634	-0.138457	-0.0390101
179.9	-0.148292	-0.0405397	-0.120036	-0.0394214
180	-0.170892	-0.0259564	-0.100494	-0.0399813
180.1	-0.195932	-0.00966359	-0.0800811	-0.0407494
180.2	-0.223019	0.00792338	-0.0591473	-0.0417983
180.3	-0.251671	0.0264186	-0.0379589	-0.0432189
180.4	-0.281408	0.0454453	-0.0168727	-0.0451833
180.5	-0.311702	0.0646292	0.0037936	-0.047766
180.6	-0.341967	0.0836598	0.0237041	-0.0511244
180.7	-0.371658	0.102219	0.0425171	-0.0553441
180.8	-0.400203	0.120113	0.0599634	-0.0605158
180.9	-0.427061	0.137127	0.0757316	-0.0666592
181	-0.451652	0.153174	0.0896253	-0.0737552
181.1	-0.473462	0.168172	0.101422	-0.0817487
181.2	-0.492002	0.182156	0.111015	-0.0905174
181.3	-0.506812	0.19514	0.118283	-0.0998876
181.4	-0.517504	0.207221	0.123202	-0.109661
181.5	-0.523733	0.218516	0.125818	-0.119619
181.6	-0.525281	0.229157	0.126205	-0.1295
181.7	-0.521973	0.239298	0.124518	-0.139071
181.8	-0.513729	0.249079	0.120934	-0.148096
181.9	-0.500553	0.258638	0.115676	-0.156388
182	-0.482524	0.268058	0.109009	-0.16376
182.1	-0.459848	0.277425	0.101202	-0.170099
182.2	-0.432811	0.286746	0.0925373	-0.1753
182.3	-0.401792	0.296011	0.0832692	-0.179345
182.4	-0.367183	0.305153	0.0736375	-0.182226
182.5	-0.329486	0.314034	0.0638573	-0.184003
182.6	-0.289242	0.322502	0.054113	-0.184733
182.7	-0.247022	0.33031	0.0445345	-0.184524
182.8	-0.203421	0.337211	0.0352266	-0.183461
182.9	-0.159018	0.342907	0.0262434	-0.181688
183	-0.114418	0.347085	0.0175772	-0.179301
183.1	-0.0701557	0.349422	0.0092143	-0.176405
183.2	-0.0268029	0.349627	0.00108124	-0.173068
183.3	0.0151527	0.347414	-0.00685978	-0.169358
183.4	0.0552633	0.34256	-0.0146859	-0.165315
183.5	0.0931444	0.334889	-0.0224428	-0.160973
183.6	0.128476	0.324301	-0.0302016	-0.156326
183.7	0.161	0.310804	-0.0379974	-0.151425
183.8	0.190537	0.294463	-0.045833	-0.146254
183.9	0.216981	0.275445	-0.053706	-0.14084
184	0.240269	0.254065	-0.0615577	-0.135171
184.1	0.260396	0.23068	-0.0693365	-0.129293
184.2	0.27744	0.205749	-0.0769682	-0.123215
184.3	0.291533	0.179758	-0.0843597	-0.116954
184.4	0.302871	0.153312	-0.0914153	-0.110517
184.5	0.31167	0.126968	-0.0980736	-0.103942
184.6	0.318185	0.101343	-0.104238	-0.0972305
184.7	0.322667	0.0770138	-0.109886	-0.0903825
184.8	0.325374	0.0545193	-0.114948	-0.083392
184.9	0.326606	0.034373	-0.119456	-0.0762339
185	0.326621	0.0169378	-0.123389	-0.0688582
185.1	0.325673	0.00253584	-0.126794	-0.0612016
185.2	0.323978	-0.00863823	-0.129687	-0.0531633
185.3	0.321741	-0.0164387	-0.132126	-0.0446363
185.4	0.319128	-0.0208848	-0.13414	-0.0355203
185.5	0.316259	-0.0220789	-0.135794	-0.0257257
185.6	0.313209	-0.0202139	-0.137106	-0.0151666
185.7	0.310064	-0.0155711	-0.138094	-0.00377979
185.8	0.30682	-0.00846101	-0.138728	0.00848602
185.9	0.303516	0.000724169	-0.138968	0.0215986
186	0.300134	0.0115847	-0.138729	0.0355081
186.1	0.296667	0.0237074	-0.137903	0.0501101
186.2	0.293133	0.0367124	-0.136358	0.0652668
186.3	0.289489	0.0502096	-0.133917	0.0807907
186.4	0.285785	0.0638579	-0.130403	0.0964283
186.5	0.282064	0.0773477	-0.125639	0.111933
186.6	0.278385	0.0904501	-0.119455	0.127016
186.7	0.27483	0.102926	-0.111656	0.14138
186.8	0.27155	0.114662	-0.102139	0.154698
186.9	0.268671	0.125525	-0.0907751	0.166741
187	0.26637	0.135503	-0.0775191	0.177273
187.1	0.26482	0.144572	-0.0623524	0.186103
187.2	0.264184	0.152813	-0.0453449	0.19307
187.3	0.264625	0.160276	-0.0265778	0.198093
187.4	0.266302	0.167059	-0.00626778	0.201159
187.5	0.269324	0.173281	0.0153867	0.202302
187.6	0.273786	0.179052	0.0380959	0.201637
187.7	0.279741	0.184478	0.061547	0.199267
187.8	0.287169	0.189692	0.085369	0.195399
187.9	0.296002	0.194794	0.109178	0.190208
188	0.306119	0.199884	0.132579	0.183957
188.1	0.317325	0.205041	0.155171	0.176848
188.2	0.329366	0.210321	0.176568	0.169129
188.3	0.341952	0.215737	0.196391	0.160978
188.4	0.354746	0.221287	0.214332	0.152572
188.5	0.367384	0.226922	0.230106	0.144072
188.6	0.379449	0.232578	0.243499	0.135575
188.7	0.390548	0.238166	0.254358	0.127202
188.8	0.40026	0.243558	0.262582	0.118993
188.9	0.408218	0.248623	0.268179	0.111001
189	0.414031	0.253242	0.271166	0.103237
189.1	0.41741	0.257238	0.271676	0.0957061
189.2	0.418072	0.260465	0.269849	0.0883868
189.3	0.415801	0.262748	0.265909	0.0812886
189.4	0.410465	0.263982	0.260136	0.0744037
189.5	0.401983	0.264012	0.252783	0.0677756
189.6	0.390396	0.262777	0.244155	0.0614126
189.7	0.375734	0.26022	0.234544	0.0553772
189.8	0.358181	0.256327	0.224229	0.0497181
189.9	0.33793	0.251077	0.21349	0.0445122
190	0.315216	0.244505	0.202521	0.0398391
190.1	0.290373	0.236657	0.19153	0.035782
190.2	0.263718	0.227673	0.18062	0.0324202
190.3	0.235637	0.21766	0.16987	0.0298523
190.4	0.206471	0.206799	0.159278	0.0281478
190.5	0.1766	0.195246	0.148826	0.0273983
190.6	0.146382	0.183187	0.13843	0.0276711
190.7	0.116145	0.170826	0.127955	0.0289961
190.8	0.0861944	0.158381	0.11722	0.0313833
190.9	0.0567945	0.14608	0.106048	0.0348364
191	0.0281883	0.134155	0.094226	0.0393049
191.1	0.000562168	0.122803	0.08156	0.0447376
191.2	-0.0259251	0.112232	0.067882	0.0510157
191.3	-0.0511609	0.102614	0.0530269	0.0580127
191.4	-0.0750194	0.0941163	0.0369134	0.0655596
191.5	-0.0974589	0.086852	0.0194829	0.073473
191.6	-0.118445	0.0809072	0.000778145	0.0815283
191.7	-0.137925	0.0763202	-0.019118	0.0894962
191.8	-0.155895	0.0730887	-0.0400133	0.0971037
191.9	-0.17229	0.07116	-0.0617309	0.104102
192	-0.187084	0.070398	-0.0839506	0.110206
192.1	-0.200229	0.0706652	-0.106408	0.115184
192.2	-0.211659	0.0717823	-0.128725	0.118784
192.3	-0.22134	0.0735215	-0.150565	0.120815
192.4	-0.229201	0.075625	-0.171599	0.12113
192.5	-0.235191	0.0778579	-0.191503	0.119652
192.6	-0.239246	0.0799559	-0.210028	0.116305
192.7	-0.241325	0.0816682	-0.226968	0.111171
192.8	-0.241393	0.0827588	-0.242186	0.104326
192.9	-0.239454	0.0830445	-0.255629	0.0959607
193	-0.235554	0.0824005	-0.267297	0.0862761
193.1	-0.229804	0.0807073	-0.277265	0.0755344
193.2	-0.222307	0.0779004	-0.285691	0.0640759
193.3	-0.21328	0.073963	-0.292778	0.0522374
193.4	-0.202915	0.068936	-0.298745	0.0403688
193.5	-0.191512	0.0629132	-0.303817	0.0288425
193.6	-0.179358	0.0560208	-0.308231	0.0179854
193.7	-0.16684	0.0484315	-0.31218	0.00809894
193.8	-0.154302	0.0403014	-0.315833	-0.000589068
193.9	-0.142149	0.0317941	-0.319314	-0.00787177
194	-0.130767	0.0231166	-0.322655	-0.0136124
194.1	-0.120527	0.0144418	-0.325861	-0.0177609
194.2	-0.111746	0.00592221	-0.328806	-0.0203361
194.3	-0.104707	-0.00233239	-0.331404	-0.0213982
194.4	-0.0996386	-0.0101834	-0.333447	-0.0210868
194.5	-0.0967044	-0.0175281	-0.334751	-0.0195447
194.6	-0.0960181	-0.0243416	-0.335068	-0.017001
194.7	-0.0974946	-0.0305468	-0.334222	-0.0136709
194.8	-0.101067	-0.0361659	-0.331995	-0.00978922
194.9	-0.106548	-0.0411675	-0.328258	-0.00557369
195	-0.11365	-0.045616	-0.322902	-0.00125454
195.1	-0.12202	-0.0495157	-0.31591	0.00303849
195.2	-0.131237	-0.0529186	-0.307311	0.00714319
195.3	-0.140871	-0.0558561	-0.297196	0.0109677
195.4	-0.150429	-0.0583505	-0.28575	0.0144699
195.5	-0.15944	-0.0603997	-0.273194	0.0176248
195.6	-0.167455	-0.0620247	-0.259786	0.0204966
195.7	-0.174087	-0.063205	-0.245837	0.0231217
195.8	-0.178981	-0.0639561	-0.231652	0.0255796
195.9	-0.181881	-0.0642648	-0.217573	0.0279479
196	-0.182609	-0.0641413	-0.203879	0.0303099
196.1	-0.181115	-0.0635454	-0.19087	0.0327664
196.2	-0.177401	-0.0624749	-0.178791	0.0353824
196.3	-0.171649	-0.0609315	-0.167853	0.0381947
196.4	-0.164042	-0.0589383	-0.158216	0.0411926
196.5	-0.154917	-0.0565383	-0.149988	0.0443507
196.6	-0.1446	-0.0537956	-0.143217	0.0475903
196.7	-0.133504	-0.0507691	-0.137904	0.0507888
196.8	-0.122042	-0.0475628	-0.134022	0.0537779
196.9	-0.110618	-0.04429	-0.131498	0.0564071
197	-0.0996459	-0.0410941	-0.130255	0.0584902
197.1	-0.0894602	-0.0381044	-0.130184	0.0597925
197.2	-0.0803726	-0.0354633	-0.131146	0.060137
197.3	-0.0726286	-0.0333148	-0.132987	0.0593367
197.4	-0.0664015	-0.0318202	-0.135569	0.0572459
197.5	-0.0618396	-0.0311769	-0.138733	0.053709
197.6	-0.0589624	-0.0315395	-0.14234	0.0486667
197.7	-0.0577821	-0.0331143	-0.146212	0.0420753
197.8	-0.0582226	-0.0360301	-0.15026	0.0339414
197.9	-0.0602019	-0.0404138	-0.154331	0.0243203
198	-0.0635697	-0.046371	-0.158276	0.0133482
198.1	-0.0681805	-0.0539796	-0.161967	0.00119661
198.2	-0.0738705	-0.063289	-0.165258	-0.0119874
198.3	-0.0804679	-0.0743131	-0.168026	-0.0259399
198.4	-0.0877762	-0.0869803	-0.170156	-0.0404612
198.5	-0.0956374	-0.101211	-0.171539	-0.0552754
198.6	-0.103849	-0.11685	-0.172106	-0.0701725
198.7	-0.112228	-0.133724	-0.17177	-0.0848964
198.8	-0.120603	-0.151592	-0.170546	-0.0992351
198.9	-0.128775	-0.170153	-0.168406	-0.112992
199	-0.136559	-0.189128	-0.165453	-0.125981
199.1	-0.143762	-0.208155	-0.161772	-0.138045
199.2	-0.150209	-0.226905	-0.157541	-0.149061
199.3	-0.155714	-0.245025	-0.152954	-0.158928
199.4	-0.160089	-0.262188	-0.148281	-0.167556
199.5	-0.163192	-0.278103	-0.143819	-0.17489
199.6	-0.16487	-0.292486	-0.139888	-0.18084
199.7	-0.165035	-0.305111	-0.136823	-0.185371
[truncated: 5,003 more rows]

## Sheet: 16d13007.abf
	Current (pA)
time (ms)	10uM cocaine	30uM cocaine	100uM cocaine	300uM cocaine
0	-0.539529	0.0254827	0.0740742	0.103336
0.0996094	-0.573533	0.0146564	0.0707223	0.10192
0.200195	-0.608055	0.00244727	0.0706015	0.0997725
0.299805	-0.642951	-0.0107825	0.0737486	0.0971168
0.400391	-0.678118	-0.0246301	0.0799431	0.0942157
0.5	-0.713447	-0.0386111	0.0890614	0.0912897
0.599609	-0.74887	-0.0522259	0.100743	0.0886423
0.700195	-0.784345	-0.064929	0.114621	0.0865269
0.799805	-0.819795	-0.0762305	0.130253	0.0852617
0.900391	-0.855215	-0.0856682	0.147073	0.0850976
1	-0.890495	-0.092819	0.164571	0.0862591
1.09961	-0.925628	-0.0973644	0.182228	0.0889713
1.2002	-0.960447	-0.0990449	0.199516	0.0934134
1.2998	-0.994878	-0.0977522	0.215969	0.0997948
1.40039	-1.02872	-0.0933979	0.231093	0.108206
1.5	-1.06186	-0.0860834	0.244456	0.118763
1.59961	-1.09395	-0.0759212	0.255762	0.131485
1.7002	-1.1248	-0.0631669	0.264684	0.146357
1.7998	-1.15402	-0.0480974	0.271115	0.163295
1.90039	-1.18131	-0.0310726	0.274857	0.182147
2	-1.20627	-0.0124971	0.27593	0.20275
2.09961	-1.22857	0.007261	0.274327	0.224794
2.2002	-1.2478	0.0277496	0.270174	0.24801
2.2998	-1.26361	0.0485697	0.263666	0.27199
2.40039	-1.27567	0.0693654	0.254917	0.296345
2.5	-1.28374	0.0898502	0.244263	0.320553
2.59961	-1.28759	0.109778	0.231949	0.34421
2.7002	-1.28718	0.128924	0.218292	0.366758
2.7998	-1.28244	0.147179	0.203681	0.387767
2.90039	-1.27353	0.164394	0.188355	0.406709
3	-1.26066	0.18057	0.172712	0.423229
3.09961	-1.2442	0.195674	0.157043	0.436897
3.2002	-1.22458	0.209735	0.141684	0.447499
3.2998	-1.20238	0.222823	0.126897	0.454745
3.40039	-1.17819	0.234953	0.112915	0.458584
3.5	-1.15277	0.246209	0.099994	0.458971
3.59961	-1.12686	0.256573	0.0883547	0.456024
3.7002	-1.10121	0.26619	0.0782432	0.449911
3.7998	-1.0766	0.275005	0.0698261	0.440961
3.90039	-1.05371	0.283018	0.0632317	0.429477
4	-1.03317	0.290172	0.0585962	0.415954
4.09961	-1.01551	0.296474	0.0560779	0.400819
4.2002	-1.00117	0.301896	0.0557358	0.384652
4.2998	-0.990425	0.306414	0.0577061	0.367941
4.40039	-0.983441	0.309984	0.0619493	0.351275
4.5	-0.980234	0.312582	0.068571	0.335104
4.59961	-0.980693	0.314213	0.0774948	0.31995
4.7002	-0.984511	0.31488	0.0887552	0.306238
4.7998	-0.991312	0.314641	0.102253	0.294347
4.90039	-1.00058	0.313506	0.11783	0.28454
5	-1.01171	0.311553	0.135301	0.277084
5.09961	-1.02406	0.308852	0.154482	0.272054
5.2002	-1.03698	0.305489	0.175072	0.269531
5.2998	-1.04975	0.301569	0.196846	0.269383
5.40039	-1.06169	0.297171	0.219382	0.271512
5.5	-1.07214	0.2924	0.242363	0.275641
5.59961	-1.08046	0.287227	0.265405	0.281487
5.7002	-1.08612	0.281433	0.288138	0.288613
5.7998	-1.08863	0.273469	0.310189	0.296602
5.90039	-1.08759	0.264958	0.331192	0.304882
6	-1.0827	0.255996	0.350834	0.312951
6.09961	-1.07375	0.24654	0.368838	0.320215
6.2002	-1.06065	0.236439	0.384978	0.326204
6.2998	-1.04334	0.225809	0.399115	0.330355
6.40039	-1.02191	0.214107	0.41105	0.332228
6.5	-0.99648	0.201467	0.420783	0.331398
6.59961	-0.967251	0.187714	0.428322	0.327597
6.7002	-0.934442	0.172847	0.433742	0.320614
6.7998	-0.898383	0.15694	0.437151	0.310421
6.90039	-0.859355	0.139652	0.438651	0.297103
7	-0.817748	0.121144	0.438421	0.280868
7.09961	-0.773939	0.101518	0.436668	0.262071
7.2002	-0.728284	0.0808625	0.433579	0.241216
7.2998	-0.681189	0.059557	0.429395	0.218852
7.40039	-0.633016	0.0374593	0.424216	0.195687
7.5	-0.584153	0.0149972	0.418266	0.172421
7.59961	-0.534943	-0.00756593	0.41162	0.149838
7.7002	-0.485725	-0.0299269	0.404446	0.128638
7.7998	-0.436829	-0.0516349	0.396813	0.109569
7.90039	-0.388506	-0.0727446	0.388778	0.0932403
8	-0.341077	-0.0927805	0.380318	0.0802226
8.09961	-0.294785	-0.111546	0.371508	0.0709337
8.2002	-0.249847	-0.128807	0.362285	0.0656656
8.2998	-0.206496	-0.14427	0.352689	0.0645911
8.40039	-0.164882	-0.158159	0.342582	0.067658
8.5	-0.125255	-0.17025	0.332001	0.0747476
8.59961	-0.087729	-0.180549	0.320852	0.0855526
8.7002	-0.0525031	-0.18913	0.309119	0.0997203
8.7998	-0.0196999	-0.195886	0.296771	0.116695
8.90039	0.0105249	-0.201354	0.283735	0.136011
9	0.0380123	-0.205534	0.269927	0.157045
9.09961	0.0626921	-0.208655	0.255318	0.17926
9.2002	0.084391	-0.211006	0.23979	0.202093
9.2998	0.103025	-0.212616	0.223343	0.224976
9.40039	0.118473	-0.214172	0.205835	0.247508
9.5	0.130641	-0.215735	0.187262	0.269234
9.59961	0.139423	-0.217615	0.16758	0.289921
9.7002	0.144759	-0.220031	0.14677	0.309288
9.7998	0.146584	-0.223016	0.12486	0.327228
9.90039	0.144861	-0.227038	0.101811	0.34365
10	0.139647	-0.23204	0.0777701	0.358514
10.0996	0.130981	-0.238046	0.0528328	0.371866
10.2002	0.118973	-0.24502	0.0271764	0.383695
10.2998	0.103753	-0.252688	0.000998049	0.394093
10.4004	0.0855177	-0.26127	-0.0254632	0.403098
10.5	0.0645604	-0.27036	-0.051976	0.410813
10.5996	0.0412074	-0.279734	-0.0781417	0.417304
10.7002	0.0158654	-0.289035	-0.103707	0.422673
10.7998	-0.0110658	-0.297829	-0.128226	0.427004
10.9004	-0.0390704	-0.306073	-0.151482	0.430347
11	-0.0676724	-0.313326	-0.173084	0.432834
11.0996	-0.0962668	-0.319276	-0.192744	0.43457
11.2002	-0.124367	-0.323702	-0.210174	0.435737
11.2998	-0.15141	-0.326262	-0.225108	0.436496
11.4004	-0.176951	-0.327135	-0.237465	0.437094
11.5	-0.200487	-0.326169	-0.247118	0.437762
11.5996	-0.221671	-0.323325	-0.254058	0.438763
11.7002	-0.240196	-0.318813	-0.258318	0.440369
11.7998	-0.255901	-0.312596	-0.260017	0.442867
11.9004	-0.268692	-0.305326	-0.259384	0.446592
12	-0.278608	-0.297081	-0.256648	0.451706
12.0996	-0.285783	-0.288213	-0.252094	0.458459
12.2002	-0.290442	-0.279036	-0.246107	0.466907
12.2998	-0.292963	-0.269668	-0.239004	0.477198
12.4004	-0.293736	-0.260754	-0.231307	0.489257
12.5	-0.29328	-0.252281	-0.223442	0.503026
12.5996	-0.292135	-0.244475	-0.215882	0.518275
12.7002	-0.290921	-0.237383	-0.209073	0.534779
12.7998	-0.290251	-0.230847	-0.203368	0.552173
12.9004	-0.290793	-0.22513	-0.199291	0.570129
13	-0.293121	-0.219901	-0.197106	0.588167
13.0996	-0.29779	-0.215034	-0.197213	0.60588
13.2002	-0.305252	-0.210254	-0.199831	0.622816
13.2998	-0.315931	-0.205171	-0.205173	0.638598
13.4004	-0.33014	-0.199881	-0.213355	0.652791
13.5	-0.348154	-0.194004	-0.224395	0.665087
13.5996	-0.370077	-0.187343	-0.238153	0.675187
13.7002	-0.395943	-0.179816	-0.254511	0.68293
13.7998	-0.425632	-0.171227	-0.27314	0.688181
13.9004	-0.458928	-0.161985	-0.293773	0.690935
14	-0.495545	-0.152068	-0.315918	0.691187
14.0996	-0.535093	-0.141743	-0.339072	0.689006
14.2002	-0.577105	-0.131353	-0.362653	0.684534
14.2998	-0.621078	-0.121124	-0.386031	0.677909
14.4004	-0.666448	-0.111873	-0.408655	0.669328
14.5	-0.712681	-0.103949	-0.429894	0.658919
14.5996	-0.759207	-0.0977681	-0.449157	0.646857
14.7002	-0.805468	-0.0938458	-0.465948	0.633275
14.7998	-0.85095	-0.0923566	-0.479843	0.618288
14.9004	-0.895217	-0.0940572	-0.49055	0.60193
15	-0.937848	-0.098964	-0.497836	0.584234
15.0996	-0.978493	-0.107275	-0.501555	0.565113
15.2002	-1.01689	-0.118999	-0.501731	0.544515
15.2998	-1.05281	-0.133905	-0.498446	0.52229
15.4004	-1.08614	-0.152148	-0.492002	0.49833
15.5	-1.11672	-0.173256	-0.482666	0.472426
15.5996	-1.14454	-0.19687	-0.47082	0.444476
15.7002	-1.1696	-0.222501	-0.456928	0.414364
15.7998	-1.19195	-0.249501	-0.441402	0.382023
15.9004	-1.21167	-0.277659	-0.424749	0.34742
16	-1.22882	-0.306251	-0.407359	0.310644
16.0996	-1.24347	-0.334744	-0.389596	0.271839
16.2002	-1.25581	-0.362566	-0.371832	0.231258
16.2998	-1.26593	-0.38909	-0.354309	0.1892
16.4004	-1.27401	-0.414215	-0.337321	0.14614
16.5	-1.28014	-0.43738	-0.320993	0.102534
16.5996	-1.28449	-0.458279	-0.305384	0.0590007
16.7002	-1.28718	-0.476617	-0.290517	0.0160776
16.7998	-1.28847	-0.492063	-0.276353	-0.02557
16.9004	-1.28852	-0.504809	-0.262893	-0.0653478
17	-1.28757	-0.51462	-0.250048	-0.102673
17.0996	-1.28594	-0.521476	-0.2377	-0.137059
17.2002	-1.28387	-0.525408	-0.225767	-0.16808
17.2998	-1.28173	-0.526349	-0.214067	-0.195451
17.4004	-1.27981	-0.524717	-0.202551	-0.218997
17.5	-1.27846	-0.520486	-0.191073	-0.238673
17.5996	-1.27803	-0.513794	-0.17955	-0.254596
17.7002	-1.27883	-0.504779	-0.167845	-0.266982
17.7998	-1.28118	-0.493494	-0.15588	-0.276163
17.9004	-1.28523	-0.480412	-0.14358	-0.282637
18	-1.29125	-0.465586	-0.13085	-0.286871
18.0996	-1.29923	-0.449142	-0.117594	-0.2895
18.2002	-1.30921	-0.431267	-0.103753	-0.291075
18.2998	-1.32105	-0.41191	-0.0892344	-0.292239
18.4004	-1.33453	-0.391596	-0.0740831	-0.293494
18.5	-1.34932	-0.370256	-0.0582432	-0.295419
18.5996	-1.36498	-0.347975	-0.0417262	-0.298396
18.7002	-1.38098	-0.324895	-0.0245855	-0.302762
18.7998	-1.39668	-0.300859	-0.00688535	-0.308746
18.9004	-1.41143	-0.276311	0.0112281	-0.316416
19	-1.42456	-0.251057	0.0296543	-0.325859
19.0996	-1.43539	-0.225166	0.0481779	-0.336952
19.2002	-1.44323	-0.198577	0.0666346	-0.34956
19.2998	-1.44746	-0.171136	0.0848403	-0.363412
19.4004	-1.44754	-0.143158	0.102553	-0.378209
19.5	-1.44304	-0.114425	0.119602	-0.393651
19.5996	-1.43366	-0.0849196	0.135766	-0.409349
19.7002	-1.41922	-0.0545481	0.150889	-0.425044
19.7998	-1.39966	-0.0231421	0.16483	-0.440388
19.9004	-1.37509	0.00902038	0.177422	-0.45516
20	-1.34572	0.0420374	0.188548	-0.469151
20.0996	-1.31199	0.0758974	0.198209	-0.482199
20.2002	-1.27433	0.11048	0.206364	-0.494251
20.2998	-1.23336	0.145863	0.213118	-0.505273
20.4004	-1.18976	0.181528	0.218528	-0.51533
20.5	-1.14423	0.217451	0.222792	-0.524497
20.5996	-1.09757	0.253377	0.226124	-0.532914
20.7002	-1.05048	0.28903	0.22879	-0.540744
20.7998	-1.00372	0.324262	0.231073	-0.548145
20.9004	-0.957932	0.358454	0.233361	-0.555285
21	-0.913803	0.391461	0.235998	-0.562231
21.0996	-0.871806	0.423014	0.239482	-0.569143
21.2002	-0.832438	0.452777	0.244156	-0.575998
21.2998	-0.795942	0.480702	0.2505	-0.58282
21.4004	-0.762528	0.50616	0.258776	-0.589494
21.5	-0.732225	0.529182	0.269347	-0.595883
21.5996	-0.705035	0.549628	0.282429	-0.601792
21.7002	-0.6808	0.567472	0.298206	-0.60704
21.7998	-0.659328	0.582812	0.316803	-0.611412
21.9004	-0.640305	0.595312	0.338132	-0.614649
22	-0.623384	0.605168	0.362141	-0.616518
22.0996	-0.608169	0.612447	0.388548	-0.616758
22.2002	-0.594235	0.617213	0.417121	-0.615208
22.2998	-0.581226	0.619764	0.447515	-0.611661
22.4004	-0.568766	0.619841	0.479256	-0.606063
22.5	-0.556584	0.617723	0.511904	-0.598338
22.5996	-0.544399	0.613488	0.544995	-0.588506
22.7002	-0.532032	0.607223	0.578085	-0.576627
22.7998	-0.519356	0.599179	0.610764	-0.562876
22.9004	-0.506352	0.589094	0.642614	-0.547369
23	-0.493036	0.577231	0.673263	-0.530331
23.0996	-0.479547	0.563665	0.702463	-0.511877
23.2002	-0.466034	0.548558	0.729997	-0.492262
23.2998	-0.452715	0.532133	0.755746	-0.471606
23.4004	-0.439782	0.514231	0.779592	-0.45016
23.5	-0.427483	0.495126	0.801508	-0.428046
23.5996	-0.416	0.475064	0.821535	-0.405479
23.7002	-0.405587	0.454204	0.839698	-0.382535
23.7998	-0.396402	0.432959	0.856164	-0.359382
23.9004	-0.38865	0.411216	0.870888	-0.336098
24	-0.382368	0.389408	0.884016	-0.312822
24.0996	-0.377666	0.367732	0.895558	-0.289667
24.2002	-0.374467	0.346424	0.905636	-0.266787
24.2998	-0.372749	0.32583	0.914265	-0.244302
24.4004	-0.372365	0.305783	0.921499	-0.222432
24.5	-0.373206	0.286561	0.927293	-0.201358
24.5996	-0.375036	0.268286	0.931717	-0.181317
24.7002	-0.377622	0.250989	0.934703	-0.162536
24.7998	-0.380663	0.234932	0.93633	-0.145269
24.9004	-0.383891	0.219756	0.936507	-0.129732
25	-0.386943	0.205641	0.93532	-0.116171
25.0996	-0.389519	0.192559	0.932762	-0.104748
25.2002	-0.391269	0.180525	0.928881	-0.0956269
25.2998	-0.391905	0.16973	0.92373	-0.0888965
25.4004	-0.391162	0.159849	0.917313	-0.0846241
25.5	-0.388791	0.151095	0.909734	-0.0827741
25.5996	-0.384567	0.143554	0.901057	-0.0832834
25.7002	-0.378337	0.13728	0.891317	-0.08599
25.7998	-0.369917	0.132654	0.880571	-0.0907075
25.9004	-0.359258	0.129386	0.868774	-0.0971411
26	-0.346269	0.127876	0.855927	-0.105064
26.0996	-0.331015	0.128218	0.84199	-0.114092
26.2002	-0.313482	0.130582	0.826885	-0.123972
26.2998	-0.293776	0.1352	0.810636	-0.134333
26.4004	-0.271993	0.141834	0.793046	-0.14494
26.5	-0.248317	0.15063	0.774094	-0.15545
26.5996	-0.222958	0.161582	0.753656	-0.165654
26.7002	-0.196138	0.17457	0.731711	-0.175309
26.7998	-0.168112	0.18963	0.708264	-0.184219
26.9004	-0.139133	0.206229	0.683332	-0.192241
27	-0.109418	0.224294	0.656985	-0.19924
27.0996	-0.079203	0.243544	0.629418	-0.205118
27.2002	-0.0486826	0.263648	0.600798	-0.209797
27.2998	-0.01805	0.284495	0.571426	-0.213181
27.4004	0.0126593	0.305418	0.541555	-0.215241
27.5	0.0433644	0.326325	0.511607	-0.215869
27.5996	0.0741172	0.346961	0.482012	-0.215051
27.7002	0.105019	0.36714	0.453199	-0.212663
27.7998	0.13623	0.386875	0.425674	-0.20865
27.9004	0.168013	0.405734	0.399788	-0.20289
28	0.200648	0.423814	0.376034	-0.195326
28.0996	0.23451	0.441147	0.354777	-0.185863
28.2002	0.269921	0.457774	0.336419	-0.174402
28.2998	0.307258	0.474003	0.321261	-0.160884
28.4004	0.346802	0.489574	0.309499	-0.145228
28.5	0.38884	0.504791	0.301309	-0.12741
28.5996	0.43357	0.51978	0.296872	-0.107396
28.7002	0.481041	0.534677	0.296203	-0.0852441
28.7998	0.531262	0.54973	0.299396	-0.0610329
28.9004	0.584	0.564573	0.306245	-0.0348775
29	0.638989	0.579371	0.316712	-0.00693109
29.0996	0.695718	0.593948	0.330581	0.0226232
29.2002	0.753601	0.608187	0.347691	0.0535165
29.2998	0.811885	0.621924	0.367738	0.0855059
29.4004	0.869758	0.634551	0.390419	0.118219
29.5	0.926398	0.645744	0.415365	0.151387
29.5996	0.98088	0.655104	0.44225	0.184583
29.7002	1.03232	0.662054	0.470642	0.217485
29.7998	1.07986	0.666345	0.500143	0.249716
29.9004	1.12271	0.667118	0.530267	0.280907
30	1.16019	0.664126	0.560569	0.310736
30.0996	1.19173	0.657005	0.59063	0.338829
30.2002	1.21699	0.645436	0.619989	0.364948
30.2998	1.23575	0.629444	0.648252	0.388818
30.4004	1.24803	0.608622	0.674947	0.410316
30.5	1.25393	0.583234	0.699722	0.429286
30.5996	1.2538	0.553538	0.722221	0.445747
30.7002	1.24815	0.519922	0.742095	0.45968
30.7998	1.23759	0.483039	0.759139	0.471201
30.9004	1.22295	0.443178	0.773047	0.480517
31	1.20508	0.401173	0.783683	0.487835
31.0996	1.18494	0.357808	0.790883	0.493468
31.2002	1.16347	0.313854	0.794552	0.497765
31.2998	1.14169	0.270326	0.794657	0.501113
31.4004	1.12051	0.22762	0.791101	0.503955
31.5	1.10088	0.18667	0.783915	0.506749
31.5996	1.08355	0.148106	0.77314	0.509902
31.7002	1.06928	0.112569	0.758811	0.513808
31.7998	1.05854	0.0806718	0.741042	0.518858
31.9004	1.05182	0.0524629	0.719849	0.525338
32	1.04929	0.0283548	0.695435	0.533522
32.0996	1.05112	0.00861075	0.667932	0.543545
32.2002	1.05719	-0.00675978	0.637509	0.555515
32.2998	1.06734	-0.0175196	0.604363	0.569406
32.4004	1.08123	-0.0241602	0.568615	0.585136
32.5	1.0984	-0.0266504	0.530563	0.602495
32.5996	1.11832	-0.0252667	0.490428	0.62127
32.7002	1.14038	-0.0202725	0.448551	0.641084
32.7998	1.16397	-0.0118596	0.405245	0.661629
32.9004	1.18842	-0.000748541	0.360824	0.682469
33	1.2131	0.012783	0.315663	0.703228
33.0996	1.23738	0.02826	0.270208	0.723437
33.2002	1.26069	0.0451523	0.224897	0.742726
33.2998	1.28248	0.0631038	0.180286	0.760654
33.4004	1.30232	0.0812225	0.136761	0.776885
33.5	1.31978	0.0991371	0.0948637	0.791044
33.5996	1.33451	0.116363	0.0550853	0.802846
33.7002	1.3462	0.132405	0.0179104	0.811963
33.7998	1.35465	0.14699	-0.016153	0.818202
33.9004	1.35968	0.159396	-0.0467704	0.821328
34	1.36122	0.169502	-0.0735349	0.821219
34.0996	1.35922	0.177092	-0.0962712	0.817688
34.2002	1.35373	0.182096	-0.114817	0.810698
34.2998	1.34481	0.184686	-0.129202	0.800161
34.4004	1.3326	0.184589	-0.139573	0.786067
34.5	1.31728	0.182166	-0.146204	0.768379
34.5996	1.29914	0.177669	-0.149468	0.747144
34.7002	1.27847	0.171431	-0.149921	0.722427
34.7998	1.25567	0.164036	-0.148128	0.694346
34.9004	1.23109	0.155535	-0.144914	0.663058
35	1.20518	0.14657	-0.140973	0.628804
35.0996	1.17832	0.138406	-0.137147	0.59182
35.2002	1.15098	0.134183	-0.134155	0.552422
35.2998	1.12351	0.130361	-0.132677	0.510963
35.4004	1.09625	0.127574	-0.133368	0.467901
35.5	1.0695	0.125798	-0.136743	0.423681
35.5996	1.04348	0.125183	-0.143099	0.378837
35.7002	1.01834	0.125704	-0.152697	0.333894
35.7998	0.994125	0.127148	-0.165429	0.289462
35.9004	0.970776	0.129684	-0.181234	0.246089
36	0.94819	0.132953	-0.199732	0.204371
36.0996	0.926157	0.136693	-0.220454	0.164837
36.2002	0.904481	0.140614	-0.242831	0.12801
36.2998	0.882846	0.144191	-0.266168	0.09436
36.4004	0.860947	0.147418	-0.289772	0.0643116
36.5	0.83849	0.149771	-0.312895	0.0381827
36.5996	0.81513	0.150919	-0.334792	0.0162214
36.7002	0.790688	0.150598	-0.354782	-0.00143686
36.7998	0.764886	0.148373	-0.372213	-0.0147279
36.9004	0.737608	0.144459	-0.386613	-0.0237517
37	0.708733	0.138555	-0.397529	-0.0286212
37.0996	0.67827	0.130693	-0.404621	-0.0296589
37.2002	0.646281	0.120843	-0.40766	-0.0271508
37.2998	0.612815	0.109042	-0.406499	-0.0215972
37.4004	0.578077	0.0958355	-0.401174	-0.0134148
37.5	0.542199	0.0813564	-0.391733	-0.00315902
37.5996	0.505493	0.0659961	-0.378302	0.00867029
37.7002	0.468224	0.0501437	-0.361068	0.0214628
37.7998	0.430703	0.0341017	-0.340282	0.0347316
37.9004	0.393265	0.0186193	-0.316311	0.0478941
38	0.356175	0.00400288	-0.289483	0.0604845
38.0996	0.319839	-0.00943289	-0.260126	0.0720563
38.2002	0.28451	-0.021297	-0.228659	0.0822052
38.2998	0.250537	-0.0315503	-0.195389	0.0905816
38.4004	0.218252	-0.0396607	-0.160781	0.0968605
38.5	0.187909	-0.0457876	-0.125171	0.100811
38.5996	0.159879	-0.0499822	-0.0889341	0.102231
38.7002	0.134421	-0.0524603	-0.0523919	0.101032
38.7998	0.111836	-0.0536804	-0.0157595	0.0971553
38.9004	0.0924528	-0.0537037	0.0207016	0.0905673
39	0.0765194	-0.0531681	0.0566286	0.0813566
39.0996	0.0643435	-0.0526116	0.0918442	0.0695806
39.2002	0.0561619	-0.052612	0.126194	0.055447
39.2998	0.0522238	-0.0539083	0.159596	0.0391366
39.4004	0.0526921	-0.0566687	0.191975	0.020971
39.5	0.0577338	-0.0615863	0.2233	0.00124512
39.5996	0.0674848	-0.0690425	0.253553	-0.0196538
39.7002	0.0819835	-0.0793731	0.282699	-0.0413061
39.7998	0.101248	-0.0929356	0.310768	-0.0632775
39.9004	0.125148	-0.109507	0.337694	-0.0850919
40	0.15353	-0.129195	0.363482	-0.106279
40.0996	0.186099	-0.151893	0.388064	-0.126298
40.2002	0.222572	-0.177301	0.411403	-0.144737
40.2998	0.262459	-0.205207	0.433387	-0.161068
40.4004	0.30528	-0.234815	0.453905	-0.174916
40.5	0.350432	-0.265739	0.472798	-0.1859
40.5996	0.397277	-0.297421	0.48996	-0.193716
40.7002	0.445121	-0.329242	0.505246	-0.19813
40.7998	0.493201	-0.360762	0.518569	-0.198959
40.9004	0.54078	-0.391001	0.52975	-0.196121
41	0.58709	-0.419564	0.538809	-0.189603
41.0996	0.631474	-0.445798	0.545618	-0.179466
41.2002	0.673216	-0.469219	0.550257	-0.165889
41.2998	0.711796	-0.489469	0.552728	-0.149096
41.4004	0.746585	-0.505834	0.55321	-0.129437
41.5	0.777193	-0.518099	0.551881	-0.107224
41.5996	0.803162	-0.525998	0.549003	-0.0829948
41.7002	0.824277	-0.529284	0.544819	-0.0571732
41.7998	0.84026	-0.527958	0.539658	-0.0303356
41.9004	0.851033	-0.521571	0.533808	-0.00295185
42	0.856498	-0.510259	0.527659	0.024409
42.0996	0.856762	-0.49406	0.521611	0.0512701
42.2002	0.851873	-0.473101	0.515992	0.0771184
42.2998	0.842087	-0.447757	0.51128	0.101538
42.4004	0.827615	-0.417934	0.507727	0.124138
42.5	0.808853	-0.384182	0.505726	0.144611
42.5996	0.786108	-0.346873	0.505507	0.162758
42.7002	0.759841	-0.306543	0.507346	0.178405
42.7998	0.730482	-0.263918	0.511428	0.191522
42.9004	0.698579	-0.219312	0.51791	0.202109
43	0.664657	-0.173562	0.526878	0.21028
43.0996	0.629311	-0.12739	0.538346	0.216168
43.2002	0.593112	-0.0815584	0.552258	0.219966
43.2998	0.556627	-0.0370174	0.568525	0.221857
43.4004	0.520387	0.00579457	0.586955	0.222122
43.5	0.484901	0.0459324	0.607347	0.220953
43.5996	0.450615	0.0826446	0.629404	0.21863
43.7002	0.417905	0.115313	0.652792	0.215334
43.7998	0.387056	0.143184	0.677134	0.211276
43.9004	0.35829	0.166196	0.702054	0.206572
44	0.331703	0.183806	0.727079	0.201411
44.0996	0.307289	0.195856	0.751842	0.195864
44.2002	0.284953	0.202274	0.775863	0.19007
44.2998	0.264476	0.203015	0.798752	0.184008
44.4004	0.245627	0.198641	0.820021	0.177776
44.5	0.228065	0.189413	0.839354	0.171354
44.5996	0.211475	0.175845	0.856303	0.164798
44.7002	0.195477	0.158564	0.870652	0.158111
44.7998	0.179752	0.138089	0.881992	0.151324
44.9004	0.163992	0.115552	0.890177	0.144467
45	0.147935	0.0916027	0.894947	0.137624
45.0996	0.13141	0.0670643	0.896269	0.130866
45.2002	0.114299	0.0427356	0.894005	0.124295
45.2998	0.0966047	0.0191672	0.888263	0.118002
45.4004	0.0783428	-0.00264189	0.879036	0.112129
45.5	0.0596686	-0.0222842	0.866566	0.106764
45.5996	0.0407597	-0.0393248	0.851067	0.1021
45.7002	0.0218855	-0.0534053	0.832907	0.0982834
45.7998	0.00331811	-0.0645245	0.812486	0.0955114
45.9004	-0.0146444	-0.0722115	0.790284	0.0939359
46	-0.0316764	-0.0767286	0.766853	0.0936878
46.0996	-0.0474991	-0.0781919	0.742788	0.0948722
46.2002	-0.0618434	-0.0769087	0.718668	0.0976168
46.2998	-0.0745209	-0.0733794	0.695138	0.101994
46.4004	-0.0853327	-0.0677093	0.672725	0.108076
46.5	-0.094165	-0.0605762	0.652032	0.115875
46.5996	-0.100977	-0.052478	0.6335	0.12536
46.7002	-0.105783	-0.0440213	0.617536	0.136434
46.7998	-0.108607	-0.035903	0.604407	0.149022
46.9004	-0.109568	-0.028398	0.594267	0.162969
47	-0.108756	-0.0221766	0.587102	0.17812
47.0996	-0.106322	-0.0177939	0.582833	0.194299
47.2002	-0.102417	-0.0156429	0.581182	0.211251
47.2998	-0.0971957	-0.0163308	0.58184	0.228783
47.4004	-0.0907841	-0.0198197	0.584288	0.246643
47.5	-0.0833487	-0.0265836	0.58807	0.264599
47.5996	-0.0749729	-0.036794	0.592577	0.282465
47.7002	-0.06583	-0.0506113	0.597245	0.300054
47.7998	-0.0559436	-0.0681926	0.601434	0.317218
47.9004	-0.0454198	-0.0891643	0.604631	0.333766
48	-0.0342918	-0.113554	0.606327	0.34962
48.0996	-0.022643	-0.14115	0.606161	0.364638
48.2002	-0.0105246	-0.171691	0.603806	0.378817
48.2998	0.00207973	-0.204998	0.599133	0.392042
48.4004	0.015106	-0.24033	0.592031	0.404325
48.5	0.028582	-0.277375	0.582601	0.415655
48.5996	0.0424414	-0.315643	0.570964	0.426018
48.7002	0.056675	-0.354599	0.557432	0.435453
48.7998	0.0712325	-0.39389	0.542326	0.443938
48.9004	0.0860459	-0.432609	0.526067	0.451514
49	0.101074	-0.470423	0.509114	0.458211
49.0996	0.116177	-0.506835	0.491964	0.464085
49.2002	0.131254	-0.541352	0.475126	0.469147
49.2998	0.1461	-0.573714	0.459047	0.473421
49.4004	0.160579	-0.603198	0.44413	0.476957
49.5	0.174471	-0.629682	0.430699	0.479723
49.5996	0.187609	-0.652959	0.419066	0.48175
49.7002	0.199735	-0.672911	0.409348	0.48299
49.7998	0.210602	-0.689651	0.401691	0.48348
49.9004	0.219961	-0.702907	0.396023	0.483106
50	0.227566	-0.712948	0.39226	0.481872
50.0996	0.233222	-0.71999	0.39015	0.479716
50.2002	0.23673	-0.724326	0.389395	0.476609
50.2998	0.237961	-0.726462	0.389564	0.472515
50.4004	0.236842	-0.726497	0.390243	0.467381
50.5	0.233305	-0.725034	0.390964	0.461222
50.5996	0.227444	-0.722624	0.391245	0.453991
50.7002	0.219368	-0.7197	0.390602	0.445755
50.7998	0.209299	-0.71697	0.388577	0.436593
50.9004	0.197496	-0.714542	0.384784	0.426646
51	0.184297	-0.713049	0.378877	0.416053
51.0996	0.170054	-0.712876	0.370628	0.405021
51.2002	0.155212	-0.714328	0.359815	0.393821
51.2998	0.140165	-0.717843	0.346396	0.382696
51.4004	0.125402	-0.723248	0.330348	0.371971
51.5	0.111322	-0.730834	0.311793	0.361908
51.5996	0.0983337	-0.740599	0.290917	0.35284
51.7002	0.0867666	-0.752524	0.267972	0.345051
51.7998	0.076952	-0.766628	0.243326	0.338828
51.9004	0.0690718	-0.78244	0.217278	0.334428
52	0.0632512	-0.799843	0.190308	0.332002
52.0996	0.059563	-0.818625	0.162812	0.331717
52.2002	0.0579407	-0.838394	0.135289	0.333644
52.2998	0.0583305	-0.859019	0.108211	0.337858
52.4004	0.0605268	-0.879747	0.0820215	0.344305
52.5	0.0643325	-0.90043	0.057209	0.352932
52.5996	0.06938	-0.920677	0.0342447	0.363596
52.7002	0.0753738	-0.940134	0.0135501	0.376156
52.7998	0.0818918	-0.95857	-0.00442968	0.390393
52.9004	0.0885418	-0.975336	-0.0193125	0.406099
53	0.0948786	-0.990264	-0.0307622	0.422984
53.0996	0.100502	-1.00306	-0.0384734	0.440866
53.2002	0.105002	-1.01344	-0.0422002	0.45943
53.2998	0.108017	-1.02128	-0.0417836	0.478522
53.4004	0.109177	-1.02601	-0.0371028	0.497879
53.5	0.108215	-1.02757	-0.0281896	0.517355
53.5996	0.104849	-1.02577	-0.015124	0.536703
53.7002	0.0988874	-1.02049	0.00186682	0.555815
53.7998	0.0901981	-1.01175	0.0225451	0.574466
53.9004	0.0786692	-0.999152	0.046412	0.592603
54	0.0643036	-0.982844	0.0730407	0.610047
54.0996	0.04718	-0.962823	0.101745	0.626752
54.2002	0.0274228	-0.939157	0.131892	0.642524
54.2998	0.00523709	-0.912148	0.162683	0.657286
54.4004	-0.0191264	-0.881675	0.19338	0.670807
54.5	-0.0453442	-0.848121	0.223116	0.682985
54.5996	-0.0730574	-0.811846	0.251177	0.693571
54.7002	-0.101833	-0.773179	0.276765	0.702417
54.7998	-0.131219	-0.732761	0.299264	0.709224
54.9004	-0.160755	-0.690638	0.318014	0.713798
55	-0.189971	-0.647559	0.332588	0.715839
55.0996	-0.218424	-0.60398	0.342627	0.715146
55.2002	-0.245689	-0.56052	0.347973	0.711473
55.2998	-0.271466	-0.517766	0.348578	0.704665
55.4004	-0.295444	-0.47591	0.344598	0.69454
55.5	-0.317502	-0.435461	0.336269	0.681044
55.5996	-0.337512	-0.396887	0.324049	0.664105
55.7002	-0.355466	-0.360429	0.308462	0.64386
55.7998	-0.371426	-0.326571	0.290181	0.620406
55.9004	-0.385567	-0.295117	0.269814	0.594074
56	-0.398128	-0.266383	0.248132	0.565189
56.0996	-0.409384	-0.240398	0.225871	0.534206
56.2002	-0.419656	-0.217169	0.203781	0.501636
56.2998	-0.429282	-0.196876	0.182522	0.468108
56.4004	-0.43852	-0.179126	0.162672	0.434223
56.5	-0.447732	-0.164023	0.144744	0.400702
56.5996	-0.457083	-0.151476	0.129128	0.36817
56.7002	-0.466816	-0.141454	0.116013	0.337307
56.7998	-0.477012	-0.13395	0.105547	0.308694
56.9004	-0.487751	-0.128583	0.0976467	0.282829
57	-0.499008	-0.125322	0.0921423	0.26012
57.0996	-0.510674	-0.124143	0.088694	0.240876
57.2002	-0.522655	-0.124834	0.0869203	0.22524
57.2998	-0.534738	-0.127448	0.0863241	0.213231
57.4004	-0.546765	-0.131376	0.0863586	0.20468
57.5	-0.558494	-0.136524	0.0864618	0.199389
57.5996	-0.569787	-0.142567	0.0860595	0.196917
57.7002	-0.580431	-0.149146	0.0845853	0.196804
57.7998	-0.590245	-0.156054	0.0815667	0.198413
57.9004	-0.599158	-0.162558	0.0765411	0.201183
58	-0.607072	-0.16843	0.0692304	0.204406
58.0996	-0.613982	-0.173275	0.059423	0.207511
58.2002	-0.619825	-0.17679	0.0470521	0.209914
58.2998	-0.624673	-0.178756	0.0321393	0.211121
58.4004	-0.628531	-0.178623	0.014775	0.210774
58.5	-0.631443	-0.176318	-0.00479614	0.208569
58.5996	-0.633533	-0.171765	-0.0262841	0.20438
58.7002	-0.634874	-0.164941	-0.049319	0.198113
58.7998	-0.63561	-0.156075	-0.0735378	0.18988
58.9004	-0.635851	-0.144938	-0.0984914	0.179847
59	-0.635689	-0.131841	-0.12379	0.168298
59.0996	-0.635175	-0.117008	-0.148967	0.155595
59.2002	-0.63436	-0.100666	-0.17368	0.142093
59.2998	-0.633293	-0.0832897	-0.197567	0.128207
59.4004	-0.631951	-0.0647736	-0.220442	0.114254
59.5	-0.630367	-0.0455727	-0.242027	0.100628
59.5996	-0.628496	-0.0258836	-0.262172	0.0875265
59.7002	-0.62629	-0.00595985	-0.280706	0.0752412
59.7998	-0.623708	0.0138524	-0.297524	0.0638919
59.9004	-0.620637	0.0337399	-0.312546	0.0536055
60	-0.617004	0.0533776	-0.325734	0.044473
60.0996	-0.612703	0.0726948	-0.336994	0.0364354
60.2002	-0.607676	0.0915352	-0.346272	0.0295212
60.2998	-0.601858	0.109713	-0.353507	0.0236478
60.4004	-0.595227	0.127422	-0.358653	0.0188393
60.5	-0.587803	0.144475	-0.361676	0.0150627
60.5996	-0.579624	0.16071	-0.362488	0.0123065
60.7002	-0.570805	0.176075	-0.3611	0.010607
60.7998	-0.561437	0.190261	-0.357446	0.00998832
60.9004	-0.551705	0.203515	-0.351676	0.0105223
61	-0.54176	0.215512	-0.343822	0.0122636
61.0996	-0.531898	0.226196	-0.334067	0.0152562
61.2002	-0.522336	0.235397	-0.32256	0.0195114
61.2998	-0.513388	0.242859	-0.309584	0.0249791
61.4004	-0.505231	0.248708	-0.295463	0.0315995
61.5	-0.498145	0.2527	-0.280527	0.0391964
61.5996	-0.492243	0.254668	-0.265178	0.0475581
61.7002	-0.487712	0.254534	-0.249774	0.0563948
61.7998	-0.484583	0.25199	-0.234776	0.0653701
61.9004	-0.482846	0.24734	-0.220499	0.0740294
62	-0.48243	0.240328	-0.207363	0.081962
62.0996	-0.483204	0.230936	-0.195612	0.0886949
62.2002	-0.484929	0.219156	-0.185526	0.0937912
62.2998	-0.487322	0.204844	-0.177228	0.0967966
62.4004	-0.490058	0.18844	-0.170869	0.0974259
62.5	-0.492764	0.16986	-0.166464	0.0953392
62.5996	-0.49509	0.149323	-0.163969	0.0904163
62.7002	-0.496659	0.12699	-0.163303	0.0825732
62.7998	-0.497147	0.103002	-0.164268	0.071962
62.9004	-0.496229	0.0779481	-0.166715	0.0587173
63	-0.493632	0.0520573	-0.170403	0.0432524
63.0996	-0.489149	0.0256573	-0.175097	0.025926
63.2002	-0.482656	-0.000822845	-0.180588	0.00733498
63.2998	-0.474078	-0.0272066	-0.186659	-0.0119719
63.4004	-0.463468	-0.0526911	-0.19314	-0.0312876
63.5	-0.450927	-0.0770712	-0.199861	-0.0500045
63.5996	-0.436659	-0.0998969	-0.206725	-0.0674359
63.7002	-0.42088	-0.120838	-0.21363	-0.0830247
63.7998	-0.403925	-0.139724	-0.220522	-0.0962089
63.9004	-0.386062	-0.155962	-0.227344	-0.106612
64	-0.367625	-0.169478	-0.234142	-0.113902
64.0996	-0.348851	-0.18015	-0.240894	-0.117901
64.2002	-0.330047	-0.18789	-0.247657	-0.118525
64.2998	-0.311385	-0.192814	-0.254399	-0.115816
64.4004	-0.293024	-0.194642	-0.261191	-0.109954
64.5	-0.275006	-0.193624	-0.267992	-0.101228
64.5996	-0.257319	-0.189968	-0.274811	-0.0899559
64.7002	-0.239835	-0.183853	-0.28157	-0.0765931
64.7998	-0.222422	-0.175729	-0.288207	-0.0615467
64.9004	-0.204834	-0.165527	-0.294642	-0.0453285
65	-0.186826	-0.153771	-0.30073	-0.0283475
65.0996	-0.168107	-0.140732	-0.306326	-0.0110765
65.2002	-0.148395	-0.126765	-0.311239	0.00612007
65.2998	-0.127496	-0.112351	-0.315288	0.0228984
65.4004	-0.105141	-0.0975331	-0.318261	0.0390383
65.5	-0.0812332	-0.0827649	-0.319924	0.0543027
65.5996	-0.0556742	-0.0683629	-0.320042	0.068665
65.7002	-0.0284592	-0.054598	-0.31836	0.0819896
65.7998	0.000294728	-0.0418849	-0.314665	0.0943734
65.9004	0.0304566	-0.0301246	-0.308763	0.105829
66	0.061732	-0.0197051	-0.300472	0.116542
66.0996	0.0938333	-0.0108421	-0.289651	0.126644
66.2002	0.12633	-0.00367471	-0.276183	0.136386
66.2998	0.158858	0.00139376	-0.259978	0.14593
66.4004	0.190956	0.00464729	-0.241039	0.155547
66.5	0.222201	0.00574169	-0.219448	0.165438
66.5996	0.252155	0.00466744	-0.195297	0.175843
66.7002	0.280428	0.00135396	-0.168827	0.186947
66.7998	0.306643	-0.00434265	-0.14028	0.198925
66.9004	0.330471	-0.0120468	-0.110072	0.211929
67	0.351574	-0.021851	-0.078564	0.226076
67.0996	0.369666	-0.0336083	-0.0463029	0.241422
67.2002	0.384565	-0.0471147	-0.0137462	0.258018
67.2998	0.396075	-0.0622584	0.018504	0.275803
67.4004	0.404112	-0.0784045	0.049903	0.294774
67.5	0.408591	-0.0953574	0.079818	0.314793
67.5996	0.40949	-0.112736	0.107696	0.335772
67.7002	0.40687	-0.130118	0.132967	0.357468
67.7998	0.400756	-0.147211	0.155137	0.37965
67.9004	0.391288	-0.163263	0.173728	0.402017
68	0.378643	-0.177966	0.188397	0.424278
68.0996	0.362983	-0.190917	0.198863	0.446142
68.2002	0.344581	-0.201753	0.204961	0.467241
68.2998	0.323657	-0.210349	0.206671	0.487262
68.4004	0.300579	-0.2161	0.204006	0.50582
68.5	0.275664	-0.218969	0.19718	0.522664
68.5996	0.249345	-0.218859	0.18641	0.537453
68.7002	0.222004	-0.215743	0.172078	0.549973
68.7998	0.194035	-0.20985	0.154649	0.559988
68.9004	0.165887	-0.200985	0.134645	0.567339
69	0.137955	-0.189555	0.112629	0.571918
69.0996	0.110747	-0.175876	0.0891993	0.573701
69.2002	0.0846554	-0.160314	0.0649456	0.572755
69.2998	0.0601218	-0.143456	0.0405437	0.569104
69.4004	0.0375188	-0.125379	0.016435	0.562957
69.5	0.0171794	-0.106787	-0.00680582	0.554454
69.5996	-0.000550684	-0.088114	-0.0287993	0.54385
69.7002	-0.0154156	-0.0699355	-0.0491925	0.53143
69.7998	-0.0271662	-0.0528431	-0.0676873	0.517511
69.9004	-0.0356587	-0.0369972	-0.0841704	0.502458
70	-0.0407392	-0.0229386	-0.0985554	0.486561
70.0996	-0.0423675	-0.0110734	-0.110869	0.47023
70.2002	-0.0405241	-0.00165723	-0.121252	0.453764
70.2998	-0.0352458	0.0048818	-0.129848	0.437533
70.4004	-0.0266732	0.00870944	-0.136919	0.421832
70.5	-0.0149291	0.00952155	-0.142675	0.406956
70.5996	-0.000239988	0.00719227	-0.147401	0.393155
70.7002	0.017217	0.00176163	-0.151351	0.380614
70.7998	0.0371418	-0.00694477	-0.154778	0.369511
70.9004	0.0592565	-0.018416	-0.157886	0.359949
71	0.0831791	-0.032731	-0.160837	0.352041
71.0996	0.108607	-0.0496649	-0.16373	0.345813
71.2002	0.135164	-0.0690211	-0.166587	0.34123
71.2998	0.162477	-0.0906174	-0.169421	0.338204
71.4004	0.190177	-0.113891	-0.172165	0.336625
71.5	0.217845	-0.138603	-0.174658	0.336331
71.5996	0.245098	-0.164402	-0.176765	0.33709
71.7002	0.271506	-0.190831	-0.178285	0.338713
71.7998	0.296718	-0.217615	-0.179042	0.340916
71.9004	0.320325	-0.24392	-0.178862	0.343471
72	0.342004	-0.269454	-0.17755	0.34605
72.0996	0.361393	-0.293708	-0.174971	0.348427
72.2002	0.37828	-0.316143	-0.171024	0.350334
72.2998	0.392419	-0.336496	-0.165677	0.351579
72.4004	0.403699	-0.355585	-0.158939	0.351956
72.5	0.411952	-0.373094	-0.150922	0.351413
72.5996	0.417152	-0.387052	-0.141732	0.349814
72.7002	0.419297	-0.39726	-0.131648	0.347188
72.7998	0.418459	-0.403394	-0.120916	0.343616
72.9004	0.414763	-0.405566	-0.109926	0.339241
73	0.408385	-0.403652	-0.099008	0.334234
73.0996	0.399523	-0.397846	-0.0885784	0.328874
73.2002	0.388402	-0.388303	-0.0790377	0.323427
73.2998	0.375312	-0.37528	-0.0707628	0.318236
73.4004	0.360449	-0.359279	-0.0641613	0.313565
73.5	0.344081	-0.340695	-0.0594957	0.309733
73.5996	0.326399	-0.320032	-0.0570942	0.306967
73.7002	0.307622	-0.29781	-0.0570711	0.305533
73.7998	0.287895	-0.274477	-0.0595709	0.305567
73.9004	0.267411	-0.250698	-0.0646042	0.307121
74	0.246274	-0.226884	-0.0721552	0.310137
74.0996	0.224676	-0.203448	-0.0820637	0.314472
74.2002	0.202712	-0.180773	-0.0941332	0.319931
74.2998	0.180528	-0.159085	-0.108068	0.326215
74.4004	0.158228	-0.138813	-0.123616	0.332974
74.5	0.135966	-0.119987	-0.140372	0.339801
74.5996	0.113843	-0.102742	-0.157944	0.346263
74.7002	0.0920205	-0.0870387	-0.175936	0.351878
74.7998	0.0706111	-0.0728348	-0.193977	0.35626
74.9004	0.0497972	-0.0601467	-0.211711	0.358993
75	0.0297115	-0.0488853	-0.228847	0.359783
75.0996	0.0104956	-0.0388847	-0.24515	0.358393
75.2002	-0.0077797	-0.03008	-0.260457	0.354679
75.2998	-0.0250063	-0.0222904	-0.27467	0.348632
75.4004	-0.0412082	-0.0156773	-0.287754	0.340318
75.5	-0.0563634	-0.0101284	-0.29972	0.329898
75.5996	-0.0705592	-0.00566861	-0.310666	0.317666
75.7002	-0.0838811	-0.00235134	-0.32075	0.303931
75.7998	-0.0964404	-0.000186569	-0.330141	0.289118
75.9004	-0.108397	0.000487121	-0.3391	0.273657
76	-0.119956	-0.000326921	-0.347866	0.258028
76.0996	-0.131282	-0.00284041	-0.356703	0.24267
76.2002	-0.142584	-0.00712392	-0.365869	0.228027
76.2998	-0.153958	-0.0132637	-0.375611	0.214486
76.4004	-0.165569	-0.0214249	-0.386157	0.202414
76.5	-0.177476	-0.0316422	-0.397683	0.192061
76.5996	-0.189727	-0.0438011	-0.410299	0.183692
76.7002	-0.202326	-0.0578731	-0.424141	0.177439
76.7998	-0.215164	-0.0735573	-0.439168	0.173445
76.9004	-0.228148	-0.0908165	-0.45539	0.17174
77	-0.241106	-0.109249	-0.472701	0.172316
77.0996	-0.253894	-0.128549	-0.490943	0.175117
77.2002	-0.266283	-0.148347	-0.509903	0.180033
77.2998	-0.278064	-0.168195	-0.529354	0.186961
77.4004	-0.289044	-0.187937	-0.54898	0.195725
77.5	-0.299005	-0.207098	-0.568427	0.20617
77.5996	-0.30786	-0.225389	-0.587287	0.218076
77.7002	-0.315477	-0.24248	-0.605164	0.231221
77.7998	-0.321857	-0.258149	-0.62162	0.245384
77.9004	-0.326993	-0.27238	-0.636265	0.260258
78	-0.330982	-0.285088	-0.648679	0.275587
78.0996	-0.333965	-0.296251	-0.658437	0.291002
78.2002	-0.336117	-0.305973	-0.665284	0.306206
78.2998	-0.337694	-0.314295	-0.668896	0.320771
78.4004	-0.338946	-0.321513	-0.669155	0.334323
78.5	-0.340151	-0.327763	-0.665873	0.346454
78.5996	-0.341621	-0.33323	-0.659077	0.356744
78.7002	-0.343653	-0.338161	-0.648819	0.364802
78.7998	-0.346513	-0.3426	-0.635259	0.370171
78.9004	-0.350455	-0.346878	-0.618649	0.372526
79	-0.35566	-0.350953	-0.59932	0.371449
79.0996	-0.362314	-0.354892	-0.577648	0.36668
79.2002	-0.370465	-0.358641	-0.554047	0.357969
79.2998	-0.380192	-0.362055	-0.528955	0.345191
79.4004	-0.391425	-0.365093	-0.502832	0.328302
79.5	-0.404091	-0.36746	-0.476155	0.307336
79.5996	-0.418054	-0.368963	-0.4493	0.282479
79.7002	-0.433123	-0.369279	-0.422694	0.253928
79.7998	-0.449099	-0.368077	-0.396625	0.222124
79.9004	-0.465671	-0.365202	-0.371475	0.187489
80	-0.482598	-0.360321	-0.347408	0.1506
80.0996	-0.499509	-0.353183	-0.324676	0.112085
80.2002	-0.516125	-0.34362	-0.303347	0.072626
80.2998	-0.532105	-0.331426	-0.283552	0.0329582
80.4004	-0.547177	-0.316678	-0.265284	-0.00623405
80.5	-0.561028	-0.299288	-0.248569	-0.0442285
80.5996	-0.573414	-0.279322	-0.233352	-0.0803538
80.7002	-0.584096	-0.256876	-0.21955	-0.114074
80.7998	-0.592922	-0.232033	-0.207011	-0.14489
80.9004	-0.59971	-0.205177	-0.195664	-0.172497
81	-0.604346	-0.176476	-0.185331	-0.196632
81.0996	-0.606748	-0.146241	-0.175854	-0.217281
81.2002	-0.606862	-0.114807	-0.167	-0.234453
81.2998	-0.604746	-0.0824816	-0.158563	-0.248425
81.4004	-0.600398	-0.0498064	-0.15025	-0.259438
81.5	-0.593957	-0.0171369	-0.141846	-0.267911
81.5996	-0.585499	0.0151148	-0.133013	-0.274318
81.7002	-0.575259	0.0464663	-0.123532	-0.279147
81.7998	-0.56342	0.0765413	-0.113105	-0.282926
81.9004	-0.550296	0.10477	-0.101541	-0.286066
82	-0.536168	0.130751	-0.0886507	-0.288959
82.0996	-0.521437	0.15409	-0.0742863	-0.291885
82.2002	-0.506393	0.174342	-0.0583731	-0.295084
82.2998	-0.491471	0.191232	-0.040859	-0.298573
82.4004	-0.476989	0.204234	-0.0218331	-0.302357
82.5	-0.463376	0.213157	-0.00138037	-0.306176
82.5996	-0.450939	0.217766	0.020272	-0.309775
82.7002	-0.440042	0.217938	0.0428705	-0.312709
82.7998	-0.430905	0.213658	0.066118	-0.314577
82.9004	-0.423799	0.204837	0.0896034	-0.31484
83	-0.418794	0.19164	0.112995	-0.313066
83.0996	-0.415999	0.174284	0.135889	-0.308733
83.2002	-0.415323	0.153006	0.157902	-0.3015
83.2998	-0.416632	0.128271	0.178716	-0.290995
83.4004	-0.419668	0.100367	0.19794	-0.277072
83.5	-0.4241	0.0698538	0.215339	-0.259608
83.5996	-0.429526	0.0372766	0.230663	-0.238727
83.7002	-0.435483	0.00317554	0.243792	-0.214564
83.7998	-0.441481	-0.0317672	0.254601	-0.187523
83.9004	-0.446941	-0.0671233	0.263114	-0.157999
84	-0.45132	-0.102201	0.269355	-0.126592
84.0996	-0.454102	-0.136434	0.273462	-0.0939006
84.2002	-0.454816	-0.169205	0.275566	-0.0606422
84.2998	-0.453086	-0.199912	0.275919	-0.027476
84.4004	-0.448616	-0.228144	0.27467	0.00483253
84.5	-0.441192	-0.253328	0.272149	0.0356266
84.5996	-0.430806	-0.274991	0.26851	0.0642158
84.7002	-0.41748	-0.292661	0.264056	0.0900641
84.7998	-0.401494	-0.305835	0.25894	0.112639
84.9004	-0.383148	-0.314221	0.253348	0.131586
85	-0.362892	-0.31737	0.247401	0.146589
85.0996	-0.341311	-0.314943	0.241238	0.15754
85.2002	-0.319027	-0.30664	0.234923	0.164297
85.2998	-0.296792	-0.292154	0.22851	0.166952
85.4004	-0.275343	-0.271453	0.221929	0.165622
85.5	-0.255411	-0.244433	0.215204	0.16056
85.5996	-0.237679	-0.211066	0.20833	0.152051
85.7002	-0.222786	-0.171512	0.201275	0.140531
85.7998	-0.211267	-0.125961	0.194049	0.126376
85.9004	-0.203528	-0.0749564	0.186653	0.110133
86	-0.199934	-0.0189143	0.17913	0.0922625
86.0996	-0.200593	0.0415357	0.171573	0.0733377
86.2002	-0.205557	0.105633	0.164103	0.0538274
86.2998	-0.214666	0.172666	0.156903	0.0342878
86.4004	-0.227654	0.241507	0.150184	0.0151647
86.5	-0.244112	0.311333	0.144181	-0.00304101
86.5996	-0.263513	0.381125	0.139234	-0.0199383
86.7002	-0.285233	0.449949	0.135673	-0.035117
86.7998	-0.308616	0.516862	0.133877	-0.048265
86.9004	-0.33292	0.58093	0.134175	-0.0590664
87	-0.357361	0.641396	0.136933	-0.0672967
87.0996	-0.381236	0.697661	0.142503	-0.0727899
87.2002	-0.403797	0.749154	0.151099	-0.0754222
87.2998	-0.424446	0.79559	0.16301	-0.0751119
87.4004	-0.442647	0.836528	0.178305	-0.0718638
87.5	-0.457882	0.871936	0.197054	-0.0656287
87.5996	-0.469835	0.901806	0.219159	-0.056504
87.7002	-0.478174	0.926268	0.244447	-0.0445145
87.7998	-0.482801	0.945643	0.272584	-0.0298362
87.9004	-0.483655	0.960049	0.303142	-0.0125404
88	-0.480803	0.969909	0.335575	0.00714333
88.0996	-0.47438	0.975593	0.369286	0.0290644
88.2002	-0.464573	0.977472	0.403496	0.0529958
88.2998	-0.451648	0.975994	0.437514	0.078731
88.4004	-0.435815	0.971354	0.470477	0.10609
88.5	-0.417368	0.963933	0.501689	0.13479
88.5996	-0.39653	0.954021	0.530361	0.164634
88.7002	-0.373515	0.941846	0.555879	0.19534
88.7998	-0.34853	0.927673	0.577655	0.226746
88.9004	-0.3217	0.911486	0.595277	0.258599
89	-0.293141	0.893412	0.608409	0.290726
89.0996	-0.26291	0.87353	0.616939	0.322966
89.2002	-0.231045	0.851854	0.620748	0.35512
89.2998	-0.197565	0.828431	0.61995	0.387119
89.4004	-0.162475	0.803066	0.614653	0.418802
89.5	-0.125803	0.775806	0.605181	0.450128
89.5996	-0.0876061	0.746596	0.59183	0.480954
89.7002	-0.0479514	0.715463	0.574996	0.511228
89.7998	-0.00700764	0.68242	0.555069	0.54086
89.9004	0.0350542	0.647349	0.532414	0.569739
90	0.0779529	0.610374	0.507429	0.597773
90.0996	0.121405	0.571568	0.480406	0.624773
90.2002	0.165055	0.531079	0.451666	0.650639
90.2998	0.208561	0.489199	0.421354	0.675085
90.4004	0.2515	0.446078	0.389658	0.697942
90.5	0.293512	0.402049	0.356706	0.718908
90.5996	0.334208	0.357524	0.322632	0.737697
90.7002	0.37329	0.312815	0.287497	0.754016
90.7998	0.407457	0.268497	0.251458	0.767623
90.9004	0.439096	0.224776	0.214582	0.778273
91	0.468344	0.182217	0.177053	0.785704
91.0996	0.495311	0.141168	0.139062	0.789805
91.2002	0.520135	0.102075	0.100845	0.790468
91.2998	0.542615	0.0652804	0.0627123	0.787702
91.4004	0.563176	0.0309085	0.0249946	0.781585
91.5	0.581665	-0.000812222	-0.0118838	0.772319
91.5996	0.598473	-0.0297101	-0.0475052	0.760124
91.7002	0.613929	-0.0557488	-0.0814215	0.745319
91.7998	0.627989	-0.0788583	-0.113182	0.728305
91.9004	0.641098	-0.099299	-0.142368	0.709477
92	0.653186	-0.117151	-0.168552	0.689312
92.0996	0.664511	-0.132585	-0.191316	0.66824
92.2002	0.675333	-0.145877	-0.210319	0.646735
92.2998	0.685432	-0.157155	-0.225287	0.62515
92.4004	0.695196	-0.166884	-0.236019	0.603918
92.5	0.704365	-0.175208	-0.242384	0.583297
92.5996	0.713186	-0.182417	-0.244308	0.563573
92.7002	0.72183	-0.188743	-0.241868	0.544893
92.7998	0.73013	-0.194393	-0.235091	0.527434
92.9004	0.738467	-0.199712	-0.224244	0.511206
93	0.746725	-0.204894	-0.209502	0.496304
93.0996	0.755242	-0.210051	-0.191275	0.482605
93.2002	0.764401	-0.215405	-0.169872	0.470131
93.2998	0.774256	-0.220951	-0.14581	0.458774
93.4004	0.785376	-0.226967	-0.119561	0.448476
93.5	0.79783	-0.233396	-0.0917346	0.439043
93.5996	0.812075	-0.240273	-0.0629163	0.430437
93.7002	0.828591	-0.247544	-0.033789	0.422452
93.7998	0.847339	-0.255101	-0.00501589	0.415051
93.9004	0.868846	-0.262961	0.0226924	0.408066
94	0.892943	-0.270895	0.0486134	0.401459
94.0996	0.91986	-0.278732	0.0720625	0.39507
94.2002	0.949638	-0.286214	0.092355	0.388842
94.2998	0.981846	-0.293	0.108887	0.382621
94.4004	1.01645	-0.298951	0.121031	0.376365
94.5	1.05279	-0.303724	0.128334	0.369884
94.5996	1.09049	-0.306995	0.130372	0.363107
94.7002	1.12913	-0.30854	0.126866	0.355892
94.7998	1.16773	-0.307992	0.117674	0.348155
94.9004	1.2059	-0.305345	0.102768	0.339732
95	1.24258	-0.300309	0.0823193	0.330567
95.0996	1.27722	-0.292807	0.0566523	0.320549
95.2002	1.30921	-0.282684	0.0262054	0.309681
95.2998	1.33772	-0.269852	-0.00842553	0.297891
95.4004	1.36244	-0.254379	-0.0465571	0.285236
95.5	1.38266	-0.236264	-0.0873264	0.271724
95.5996	1.3982	-0.215554	-0.129826	0.257471
95.7002	1.40898	-0.192351	-0.173109	0.242584
95.7998	1.41469	-0.166695	-0.216192	0.227254
95.9004	1.41564	-0.138908	-0.258174	0.211672
96	1.41177	-0.109077	-0.298179	0.196114
96.0996	1.40354	-0.0773802	-0.335442	0.180789
96.2002	1.3915	-0.044066	-0.369255	0.165978
96.2998	1.37586	-0.00926653	-0.399122	0.15188
96.4004	1.35745	0.0265272	-0.424636	0.138748
96.5	1.3366	0.0631124	-0.445594	0.126791
96.5996	1.31402	0.100087	-0.461906	0.116149
96.7002	1.29047	0.13713	-0.47367	0.106914
96.7998	1.26629	0.173875	-0.481115	0.099118
96.9004	1.2422	0.209798	-0.484609	0.0926883
97	1.21842	0.244503	-0.484581	0.0875327
97.0996	1.19542	0.277649	-0.481517	0.0834737
97.2002	1.17363	0.308863	-0.475953	0.0803494
97.2998	1.15301	0.33791	-0.468436	0.0778292
97.4004	1.13389	0.364404	-0.459565	0.0756929
97.5	1.11607	0.38817	-0.449843	0.0736119
97.5996	1.09956	0.409117	-0.439798	0.0713554
97.7002	1.08439	0.427143	-0.429859	0.0686641
97.7998	1.07006	0.442412	-0.420445	0.0654114
97.9004	1.0566	0.454819	-0.411896	0.0614822
98	1.04346	0.464683	-0.404557	0.0568587
98.0996	1.03044	0.472122	-0.398608	0.0516268
98.2002	1.01742	0.47743	-0.394297	0.0459447
98.2998	1.00378	0.480924	-0.391679	0.0400637
98.4004	0.9895	0.482658	-0.390933	0.0342138
98.5	0.974039	0.482995	-0.392064	0.0288007
98.5996	0.957319	0.482139	-0.395135	0.0241276
98.7002	0.939283	0.480317	-0.400137	0.0205722
98.7998	0.919514	0.477697	-0.407043	0.0184163
98.9004	0.89823	0.474312	-0.415781	0.0179336
99	0.875099	0.470272	-0.426219	0.0192859
99.0996	0.850274	0.465714	-0.438186	0.0224787
99.2002	0.823981	0.460652	-0.451432	0.0274969
99.2998	0.796019	0.455251	-0.465723	0.0341166
99.4004	0.766861	0.449386	-0.480749	0.0421045
99.5	0.736365	0.443189	-0.49616	0.0510251
99.5996	0.704931	0.436737	-0.511514	0.0604245
99.7002	0.672921	0.430115	-0.526391	0.0697304
99.7998	0.640319	0.423544	-0.540318	0.0783376
99.9004	0.607772	0.416976	-0.552893	0.0856446
100	0.57528	0.410644	-0.563605	0.0910385
100.1	0.543397	0.404651	-0.572113	0.0940119
100.2	0.51259	0.399139	-0.578022	0.0940824
100.3	0.482949	0.394272	-0.581	0.0909289
100.4	0.455064	0.389983	-0.580821	0.0842608
100.5	0.429022	0.386384	-0.577338	0.0739725
100.6	0.405207	0.383514	-0.570498	0.0600449
100.7	0.384053	0.381321	-0.560374	0.0426212
100.8	0.365519	0.379861	-0.547147	0.0219621
100.9	0.350075	0.378887	-0.531114	-0.00159563
101	0.337548	0.378424	-0.512624	-0.0275986
101.1	0.328118	0.378373	-0.492061	-0.0555013
101.2	0.321919	0.378682	-0.469908	-0.0847753
101.3	0.318515	0.379365	-0.446642	-0.114822
101.4	0.318058	0.380216	-0.422765	-0.145077
101.5	0.319979	0.381384	-0.398782	-0.174944
101.6	0.324192	0.382933	-0.375095	-0.203995
101.7	0.330408	0.385009	-0.352082	-0.231774
101.8	0.338027	0.387852	-0.329975	-0.258033
101.9	0.346841	0.391488	-0.309075	-0.282462
102	0.356203	0.396242	-0.289455	-0.305003
102.1	0.365767	0.402277	-0.271154	-0.325555
102.2	0.375281	0.409792	-0.254119	-0.344253
102.3	0.384028	0.419024	-0.238274	-0.361216
102.4	0.391947	0.429932	-0.223471	-0.376713
102.5	0.398376	0.442619	-0.209513	-0.390993
102.6	0.403206	0.457063	-0.196211	-0.404392
102.7	0.4063	0.473105	-0.183365	-0.417221
102.8	0.407205	0.490587	-0.170756	-0.429769
102.9	0.406034	0.509024	-0.158265	-0.442325
103	0.402428	0.528107	-0.145774	-0.455072
103.1	0.396518	0.547351	-0.13321	-0.468148
103.2	0.38846	0.566187	-0.12052	-0.481637
103.3	0.377988	0.584135	-0.107685	-0.49551
103.4	0.365521	0.60042	-0.0946993	-0.509592
103.5	0.350847	0.614542	-0.0816414	-0.52372
103.6	0.334315	0.625958	-0.0685282	-0.537583
103.7	0.316201	0.63417	-0.0554436	-0.5509
103.8	0.296478	0.638789	-0.0424023	-0.563262
103.9	0.27561	0.639329	-0.0295179	-0.574311
104	0.253553	0.635546	-0.0167957	-0.583602
104.1	0.230608	0.627262	-0.0043234	-0.590783
104.2	0.207136	0.614365	0.00787047	-0.595506
104.3	0.18305	0.596926	0.0197349	-0.597528
104.4	0.158781	0.574897	0.0311544	-0.596598
104.5	0.134167	0.548557	0.0420589	-0.592625
104.6	0.109472	0.518166	0.0523626	-0.58551
104.7	0.0849053	0.484108	0.0619377	-0.575274
104.8	0.0602348	0.446833	0.0706951	-0.561988
104.9	0.0357865	0.406748	0.0784753	-0.545831
105	0.0113124	0.364459	0.0851551	-0.527007
105.1	-0.0130721	0.32056	0.0906141	-0.505786
105.2	-0.0372534	0.275679	0.0947742	-0.482513
105.3	-0.0615501	0.230593	0.0976016	-0.457491
105.4	-0.0857199	0.185787	0.0990762	-0.43108
105.5	-0.110112	0.142083	0.0992614	-0.403614
105.6	-0.134561	0.100114	0.0982793	-0.375437
105.7	-0.159004	0.0605369	0.0963206	-0.346899
105.8	-0.183714	0.0240073	0.0936664	-0.318307
105.9	-0.20846	-0.00906957	0.0906377	-0.289964
106	-0.233541	-0.0381715	0.0876147	-0.262111
106.1	-0.258824	-0.0628617	0.0849828	-0.234967
106.2	-0.28422	-0.0828561	0.0831405	-0.20869
106.3	-0.309951	-0.097846	0.0824584	-0.183422
106.4	-0.335805	-0.107886	0.083212	-0.15918
106.5	-0.362066	-0.112915	0.0856784	-0.136019
106.6	-0.388623	-0.113025	0.0900216	-0.11388
106.7	-0.415328	-0.108465	0.0963027	-0.0926954
106.8	-0.442425	-0.0994161	0.104473	-0.0723313
106.9	-0.469637	-0.0864324	0.114332	-0.0526437
107	-0.497185	-0.0698724	0.125576	-0.0334501
107.1	-0.52486	-0.0503065	0.137831	-0.0145465
107.2	-0.552406	-0.0282495	0.150572	0.00423321
107.3	-0.579987	-0.00426655	0.163301	0.0231115
107.4	-0.607163	0.0209719	0.17538	0.0422574
107.5	-0.633972	0.0469179	0.186286	0.0618782
107.6	-0.660078	0.0730261	0.195421	0.0821247
107.7	-0.685009	0.0987834	0.202347	0.103115
107.8	-0.708747	0.123806	0.206656	0.124984
107.9	-0.730676	0.14756	0.208031	0.147727
108	-0.750708	0.16981	0.206292	0.171443
108.1	-0.768329	0.190316	0.201392	0.196073
108.2	-0.782945	0.20895	0.193401	0.221679
108.3	-0.794426	0.225736	0.182528	0.248116
108.4	-0.80199	0.240532	0.169062	0.275366
108.5	-0.805566	0.253523	0.153409	0.303303
108.6	-0.804489	0.264834	0.136092	0.331833
108.7	-0.798263	0.274713	0.117635	0.360783
108.8	-0.786763	0.283397	0.0986517	0.389941
108.9	-0.769362	0.291009	0.0797023	0.419219
109	-0.746034	0.297823	0.0614168	0.448384
109.1	-0.71637	0.304079	0.0443119	0.477294
109.2	-0.680111	0.309973	0.0289674	0.505727
109.3	-0.637395	0.315756	0.0158456	0.533478
109.4	-0.588033	0.32138	0.00536685	0.560278
109.5	-0.532389	0.326944	-0.00212313	0.58585
109.6	-0.47063	0.332447	-0.00633627	0.609928
109.7	-0.402991	0.339774	-0.00709521	0.632179
109.8	-0.330265	0.346959	-0.0042773	0.652332
109.9	-0.252846	0.353815	0.00214112	0.669954
110	-0.171786	0.360044	0.0120996	0.684709
110.1	-0.0878102	0.365376	0.0254722	0.696212
110.2	-0.00174291	0.369493	0.0419976	0.704163
110.3	0.0851321	0.371957	0.0614171	0.708235
110.4	0.172002	0.372532	0.0832908	0.708166
110.5	0.257535	0.370799	0.107198	0.70376
110.6	0.34078	0.366322	0.132632	0.694836
110.7	0.42091	0.35878	0.159002	0.681377
110.8	0.496684	0.347688	0.185692	0.663431
110.9	0.567597	0.332945	0.212065	0.641221
111	0.632608	0.314151	0.237462	0.615031
111.1	0.69134	0.291129	0.261233	0.585301
111.2	0.743447	0.263725	0.282679	0.552575
111.3	0.788424	0.231874	0.301212	0.517487
111.4	0.826401	0.195767	0.316177	0.480709
111.5	0.857164	0.155531	0.327074	0.443033
111.6	0.880995	0.111438	0.333441	0.405237
111.7	0.898356	0.0638926	0.334921	0.368092
111.8	0.909383	0.0132939	0.331224	0.332313
111.9	0.91488	-0.0395786	0.322162	0.298555
112	0.915202	-0.0941162	0.307682	0.267373
112.1	0.911188	-0.149583	0.287819	0.239234
112.2	0.903751	-0.205125	0.262756	0.214459
112.3	0.893412	-0.260033	0.232741	0.193215
112.4	0.88132	-0.313193	0.198186	0.175553
112.5	0.868027	-0.363874	0.159564	0.161356
112.6	0.854569	-0.411147	0.117448	0.150402
112.7	0.841884	-0.454213	0.0724674	0.142372
112.8	0.830513	-0.492384	0.0253128	0.136846
112.9	0.821442	-0.524846	-0.0232691	0.133376
113	0.815065	-0.551075	-0.0725205	0.131433
113.1	0.812083	-0.5707	-0.121703	0.1305
113.2	0.813107	-0.583327	-0.17014	0.130097
113.3	0.818153	-0.588945	-0.21711	0.129759
113.4	0.827671	-0.587283	-0.262049	0.129069
113.5	0.841393	-0.578614	-0.304401	0.127714
113.6	0.859344	-0.563181	-0.343687	0.125389
113.7	0.881357	-0.541451	-0.379562	0.121948
113.8	0.906731	-0.514072	-0.411671	0.117242
113.9	0.935176	-0.48156	-0.439875	0.111299
114	0.96574	-0.44481	-0.463957	0.104163
114.1	0.997754	-0.404701	-0.483892	0.0959636
114.2	1.03053	-0.362149	-0.499605	0.0868579
114.3	1.06295	-0.318172	-0.511128	0.0771298
114.4	1.09445	-0.273487	-0.518527	0.0670093
114.5	1.12394	-0.229064	-0.52191	0.0568354
114.6	1.15078	-0.185686	-0.521338	0.0469343
114.7	1.1744	-0.144072	-0.517044	0.0376683
114.8	1.19397	-0.104962	-0.509103	0.0293421
114.9	1.20931	-0.0686643	-0.497787	0.022323
115	1.21983	-0.035708	-0.483272	0.0169213
115.1	1.22548	-0.00632032	-0.465846	0.0134174
115.2	1.22633	0.0193518	-0.445744	0.0120784
115.3	1.22219	0.0411427	-0.423296	0.0130829
115.4	1.21348	0.0592771	-0.398843	0.01656
115.5	1.20023	0.0737054	-0.372833	0.0225947
115.6	1.18289	0.0845861	-0.345632	0.0311568
115.7	1.162	0.092043	-0.317738	0.0421812
115.8	1.13777	0.0962138	-0.289591	0.0554804
115.9	1.11096	0.0974605	-0.261702	0.0708231
116	1.08184	0.0959701	-0.23447	0.0878156
116.1	1.05108	0.0918762	-0.208387	0.106052
116.2	1.01931	0.085461	-0.183805	0.125001
116.3	0.986803	0.0767667	-0.161126	0.144129
116.4	0.954345	0.0662241	-0.140658	0.162829
116.5	0.922229	0.0539419	-0.122618	0.180437
116.6	0.891039	0.0401758	-0.107149	0.196272
116.7	0.861433	0.0251623	-0.0943602	0.209686
116.8	0.83355	0.00910187	-0.0842371	0.220052
116.9	0.808099	-0.0075386	-0.0767563	0.226787
117	0.785133	-0.0245434	-0.0717875	0.229398
117.1	0.765058	-0.0415691	-0.0691303	0.22742
117.2	0.74829	-0.0583069	-0.0685961	0.220596
117.3	0.734663	-0.0744856	-0.0698675	0.208743
117.4	0.72461	-0.0896211	-0.0726731	0.191842
117.5	0.717822	-0.103464	-0.0766726	0.170021
117.6	0.714379	-0.115791	-0.0815113	0.143557
117.7	0.714289	-0.12633	-0.0868479	0.112856
117.8	0.717044	-0.135047	-0.0923308	0.0784164
117.9	0.72274	-0.141608	-0.0976502	0.0409445
118	0.730767	-0.146062	-0.102434	0.00115908
118.1	0.740993	-0.14843	-0.106376	-0.0401027
118.2	0.753181	-0.14878	-0.109183	-0.0820015
118.3	0.766671	-0.147416	-0.110573	-0.123638
118.4	0.781453	-0.144325	-0.11039	-0.164178
118.5	0.79686	-0.13993	-0.108431	-0.202831
118.6	0.812781	-0.134498	-0.104585	-0.238813
118.7	0.82899	-0.128417	-0.0987868	-0.271492
118.8	0.844988	-0.122155	-0.0910098	-0.300286
118.9	0.860785	-0.115949	-0.0812821	-0.32482
119	0.875905	-0.110276	-0.0696986	-0.344746
119.1	0.890311	-0.105512	-0.0563851	-0.359915
119.2	0.904004	-0.102036	-0.0415057	-0.37027
119.3	0.916545	-0.100234	-0.0252982	-0.375839
119.4	0.928114	-0.100219	-0.0079774	-0.376785
119.5	0.93829	-0.102263	0.0101559	-0.373312
119.6	0.94716	-0.106509	0.0288691	-0.365755
119.7	0.954756	-0.112993	0.0478589	-0.354421
119.8	0.960742	-0.121766	0.0669179	-0.33977
119.9	0.965329	-0.13249	0.0857703	-0.322142
120	0.968161	-0.144993	0.104249	-0.302008
120.1	0.969272	-0.15898	0.122165	-0.27977
120.2	0.968726	-0.174047	0.139394	-0.255852
120.3	0.966109	-0.189812	0.155851	-0.230644
120.4	0.961586	-0.205556	0.171471	-0.204523
120.5	0.954717	-0.220842	0.186215	-0.177858
120.6	0.945452	-0.235053	0.200165	-0.150987
120.7	0.933747	-0.247619	0.213313	-0.124237
120.8	0.919094	-0.258045	0.225805	-0.0979313
120.9	0.901588	-0.265624	0.237608	-0.0723709
121	0.880723	-0.269973	0.248898	-0.0478597
121.1	0.8565	-0.270745	0.259691	-0.0246664
121.2	0.828888	-0.267659	0.27014	-0.00314012
121.3	0.79758	-0.26067	0.280273	0.0164897
121.4	0.762824	-0.249564	0.290168	0.0338827
121.5	0.724484	-0.234554	0.29989	0.0488515
121.6	0.682834	-0.215819	0.309528	0.0611939
121.7	0.638419	-0.193702	0.31909	0.0707935
121.8	0.591355	-0.168712	0.328643	0.0775601
121.9	0.542572	-0.141198	0.338206	0.0814529
122	0.492462	-0.111846	0.347804	0.082561
122.1	0.441966	-0.0812645	0.357498	0.080976
122.2	0.392056	-0.0500916	0.367252	0.0769266
122.3	0.343399	-0.0190481	0.377135	0.0706298
122.4	0.297182	0.0114019	0.387066	0.0624815
122.5	0.254092	0.0406294	0.397067	0.0528474
122.6	0.215175	0.0681097	0.407035	0.0422044
122.7	0.181427	0.093492	0.416923	0.03097
122.8	0.153272	0.116311	0.426594	0.0196721
122.9	0.131614	0.136593	0.435888	0.0087067
123	0.116627	0.154088	0.444645	-0.00145763
123.1	0.108798	0.168826	0.452649	-0.0105024
123.2	0.108396	0.18082	0.459649	-0.0180364
123.3	0.115145	0.19016	0.46544	-0.0238984
123.4	0.129181	0.197176	0.469732	-0.0278982
123.5	0.149946	0.202133	0.472345	-0.0300097
123.6	0.177172	0.20526	0.473082	-0.0302196
123.7	0.210496	0.206932	0.471804	-0.0286632
123.8	0.249044	0.207313	0.468433	-0.0254538
123.9	0.292442	0.206898	0.462957	-0.0208476
124	0.339749	0.205843	0.455411	-0.0150837
124.1	0.390407	0.204375	0.44598	-0.00846527
124.2	0.443884	0.202694	0.434862	-0.0012918
124.3	0.49923	0.200859	0.4224	0.00610615
124.4	0.556096	0.199158	0.40882	0.0134036
124.5	0.613594	0.197596	0.394555	0.0203005
124.6	0.67134	0.196201	0.379888	0.0265584
124.7	0.728952	0.195011	0.365264	0.0319066
124.8	0.785704	0.193954	0.350935	0.0361593
124.9	0.841464	0.193166	0.337178	0.0391671
125	0.895568	0.19257	0.324172	0.0407807
125.1	0.94781	0.192125	0.312053	0.040937
125.2	0.998028	0.191781	0.300763	0.0395694
125.3	1.04565	0.191408	0.290289	0.0366714
125.4	1.09073	0.191158	0.28039	0.0322349
125.5	1.13279	0.190823	0.270848	0.0263182
125.6	1.17182	0.190336	0.261296	0.0189634
125.7	1.20782	0.189576	0.251408	0.0102048
125.8	1.24049	0.188275	0.240772	0.000137154
125.9	1.27005	0.186449	0.229038	-0.0111601
126	1.29631	0.183732	0.215833	-0.0235828
126.1	1.31945	0.17992	0.200895	-0.0370678
126.2	1.33978	0.174703	0.18401	-0.0514798
126.3	1.35722	0.167761	0.165107	-0.0667564
126.4	1.37229	0.158865	0.144153	-0.0826886
126.5	1.38494	0.147653	0.121259	-0.0992063
126.6	1.39559	0.133762	0.0965915	-0.116048
126.7	1.40467	0.116962	0.0704839	-0.133094
126.8	1.41221	0.0969074	0.0432687	-0.150067
126.9	1.41874	0.0736617	0.0153739	-0.16672
127	1.42421	0.0470191	-0.0127154	-0.18273
127.1	1.429	0.0170101	-0.0405053	-0.197808
127.2	1.43335	-0.0162835	-0.0675093	-0.211604
127.3	1.43714	-0.0527525	-0.0932502	-0.223798
127.4	1.44071	-0.0918902	-0.117344	-0.234073
127.5	1.44377	-0.133378	-0.139383	-0.242166
127.6	1.44647	-0.176643	-0.159105	-0.247751
127.7	1.44883	-0.221083	-0.176219	-0.250703
127.8	1.4505	-0.266053	-0.190625	-0.250818
127.9	1.45157	-0.310623	-0.202208	-0.248057
128	1.4516	-0.354021	-0.210951	-0.242361
128.1	1.4506	-0.395421	-0.216839	-0.233755
128.2	1.44846	-0.433952	-0.219972	-0.222332
128.3	1.44476	-0.468922	-0.220395	-0.208194
128.4	1.43955	-0.499372	-0.218302	-0.191556
128.5	1.43244	-0.524744	-0.213766	-0.172595
128.6	1.42345	-0.544421	-0.206968	-0.151582
128.7	1.41262	-0.558002	-0.197987	-0.128726
128.8	1.39963	-0.565256	-0.186994	-0.104281
128.9	1.38475	-0.565862	-0.17409	-0.078457
129	1.36781	-0.55995	-0.159411	-0.0514452
129.1	1.34898	-0.547665	-0.143075	-0.0235045
129.2	1.32859	-0.529422	-0.125241	0.00524867
129.3	1.30648	-0.505766	-0.106058	0.0345869
129.4	1.28313	-0.477208	-0.0857557	0.0643395
129.5	1.25852	-0.4445	-0.0645515	0.0942562
129.6	1.23302	-0.408566	-0.0426931	0.124102
129.7	1.20697	-0.370254	-0.0204914	0.153544
129.8	1.18029	-0.330692	0.0017376	0.182312
129.9	1.15341	-0.290619	0.0235655	0.210106
130	1.12616	-0.251087	0.04464	0.23654
130.1	1.09873	-0.213019	0.064448	0.261316
130.2	1.07126	-0.17726	0.0826214	0.284038
130.3	1.04339	-0.144693	0.0986839	0.304402
130.4	1.01529	-0.115752	0.112226	0.322118
130.5	0.986477	-0.0911018	0.122919	0.336957
130.6	0.956887	-0.0710869	0.130486	0.348765
130.7	0.926343	-0.0560234	0.134722	0.357482
130.8	0.894379	-0.0460657	0.135543	0.363098
130.9	0.860955	-0.041073	0.132917	0.365751
131	0.82562	-0.0409326	0.126955	0.365675
131.1	0.788304	-0.0454252	0.117933	0.363138
131.2	0.749095	-0.0541006	0.106199	0.358579
131.3	0.707662	-0.0666457	0.0922306	0.352456
131.4	0.664417	-0.0823077	0.0765504	0.345292
131.5	0.619239	-0.100648	0.0597793	0.337598
131.6	0.572595	-0.121032	0.0425885	0.329905
131.7	0.525032	-0.142941	0.0255923	0.322728
131.8	0.476779	-0.165824	0.00949127	0.316479
131.9	0.428716	-0.188997	-0.00519322	0.311598
132	0.381178	-0.212063	-0.0178655	0.308346
132.1	0.335031	-0.234588	-0.0281135	0.306961
132.2	0.291067	-0.256231	-0.0356149	0.307468
132.3	0.249684	-0.276782	-0.0401422	0.309918
132.4	0.211747	-0.295881	-0.041664	0.314149
132.5	0.177532	-0.31342	-0.0402581	0.319981
132.6	0.14761	-0.329339	-0.0361667	0.32704
132.7	0.122489	-0.343529	-0.0297006	0.335019
132.8	0.109082	-0.356083	-0.0212503	0.343397
132.9	0.100698	-0.366735	-0.0113548	0.351784
133	0.0972767	-0.375601	-0.000507487	0.35963
133.1	0.0984535	-0.382582	0.0106927	0.366512
133.2	0.103761	-0.387657	0.021744	0.371925
133.3	0.113004	-0.390812	0.0320845	0.375514
133.4	0.125302	-0.39177	0.0412915	0.376878
133.5	0.140288	-0.390457	0.048942	0.375749
133.6	0.157078	-0.38674	0.0548207	0.371871
133.7	0.174764	-0.380428	0.0586699	0.365149
133.8	0.192811	-0.371473	0.060475	0.355499
133.9	0.210128	-0.359555	0.06017	0.342976
134	0.22622	-0.344659	0.0578909	0.327688
134.1	0.24018	-0.326739	0.0537979	0.309832
134.2	0.251175	-0.305759	0.0481447	0.289627
134.3	0.25889	-0.281902	0.0411684	0.267373
134.4	0.262483	-0.255097	0.0331615	0.243417
134.5	0.261849	-0.225654	0.024428	0.21811
134.6	0.256484	-0.193871	0.0152729	0.191865
134.7	0.246044	-0.160119	0.00595759	0.165091
134.8	0.230709	-0.124921	-0.00332281	0.138149
134.9	0.210185	-0.0886309	-0.0123921	0.111391
135	0.18493	-0.0518637	-0.0211733	0.0851402
135.1	0.154991	-0.0151881	-0.0296017	0.0597247
135.2	0.12056	0.0208314	-0.0376849	0.0354193
135.3	0.0823293	0.0555046	-0.0454718	0.0124694
135.4	0.040508	0.0884723	-0.0531239	-0.00894634
135.5	-0.00407245	0.119125	-0.0607379	-0.0286779
135.6	-0.0509723	0.146977	-0.0684815	-0.0466185
135.7	-0.0997134	0.171665	-0.0764903	-0.0627128
135.8	-0.149335	0.192761	-0.0849047	-0.0769327
135.9	-0.199451	0.210242	-0.0938214	-0.0893153
136	-0.249082	0.223829	-0.103318	-0.0998745
136.1	-0.297733	0.23351	-0.113387	-0.108692
136.2	-0.344865	0.23925	-0.124026	-0.11582
136.3	-0.389643	0.241082	-0.135068	-0.121373
136.4	-0.431757	0.239283	-0.146413	-0.125449
136.5	-0.470495	0.233978	-0.157842	-0.12818
136.6	-0.505508	0.225369	-0.16912	-0.129642
136.7	-0.536646	0.213722	-0.179988	-0.129958
136.8	-0.563324	0.199201	-0.190178	-0.129274
136.9	-0.585616	0.182254	-0.199426	-0.127682
137	-0.603168	0.163069	-0.207508	-0.125322
137.1	-0.616031	0.141883	-0.214177	-0.12229
137.2	-0.624474	0.118965	-0.219249	-0.118729
137.3	-0.62829	0.0943791	-0.222584	-0.11468
137.4	-0.628041	0.0685376	-0.224156	-0.110293
137.5	-0.623732	0.0414201	-0.223928	-0.105626
137.6	-0.615874	0.0132631	-0.221941	-0.100825
137.7	-0.605018	-0.0158515	-0.218299	-0.0959693
137.8	-0.591261	-0.0458241	-0.213046	-0.0911272
137.9	-0.575423	-0.0763901	-0.206366	-0.0864352
138	-0.557635	-0.1075	-0.198351	-0.0819186
138.1	-0.538586	-0.139004	-0.18916	-0.0777092
138.2	-0.518892	-0.170717	-0.178932	-0.0738049
138.3	-0.498735	-0.202493	-0.167812	-0.0702827
138.4	-0.478888	-0.233954	-0.155934	-0.0671776
138.5	-0.459439	-0.264871	-0.14343	-0.0645036
138.6	-0.440956	-0.295058	-0.130404	-0.0622434
138.7	-0.423856	-0.324151	-0.116993	-0.0603648
138.8	-0.408187	-0.351976	-0.103302	-0.0588357
138.9	-0.394476	-0.378025	-0.0895075	-0.0575388
139	-0.382635	-0.402148	-0.0757687	-0.0564574
139.1	-0.372936	-0.424053	-0.0622645	-0.0554485
139.2	-0.365576	-0.44356	-0.0492314	-0.0544682
139.3	-0.360314	-0.460569	-0.0367985	-0.0533587
139.4	-0.357377	-0.474823	-0.0252322	-0.0520218
139.5	-0.356351	-0.486384	-0.014671	-0.0503624
139.6	-0.357225	-0.495264	-0.00534386	-0.0482435
139.7	-0.359906	-0.501549	0.00263286	-0.0456381
139.8	-0.363802	-0.505506	0.00917582	-0.0424363
139.9	-0.368871	-0.507164	0.0142515	-0.038656
140	-0.374503	-0.50684	0.0178699	-0.0342615
140.1	-0.380407	-0.504777	0.0201684	-0.0293006
140.2	-0.386311	-0.501232	0.0213321	-0.0238304
140.3	-0.391479	-0.496508	0.0216476	-0.0179583
140.4	-0.395791	-0.490698	0.0214475	-0.0118205
140.5	-0.398539	-0.484089	0.0211406	-0.00557596
140.6	-0.39948	-0.476852	0.0211732	0.000577075
140.7	-0.398452	-0.46907	0.021984	0.00643638
140.8	-0.394853	-0.460934	0.0239932	0.0117801
140.9	-0.388794	-0.452281	0.0275678	0.0163653
141	-0.379816	-0.443209	0.0329829	0.0200026
141.1	-0.3681	-0.433642	0.0404904	0.0224286
141.2	-0.353757	-0.423567	0.0501418	0.023489
141.3	-0.336711	-0.412991	0.0619815	0.0229524
141.4	-0.317406	-0.401672	0.0757622	0.0207265
141.5	-0.295897	-0.389641	0.0912787	0.0166561
141.6	-0.272621	-0.376855	0.108094	0.0107089
141.7	-0.248214	-0.363271	0.125739	0.00281054
141.8	-0.222808	-0.348982	0.143619	-0.0069729
141.9	-0.197185	-0.33384	0.161114	-0.0186135
142	-0.171442	-0.317985	0.177572	-0.0319746
142.1	-0.146185	-0.301529	0.192362	-0.046892
142.2	-0.121895	-0.284538	0.204936	-0.0631427
142.3	-0.0986124	-0.267296	0.214773	-0.0804869
142.4	-0.0767969	-0.249715	0.221489	-0.0986582
142.5	-0.0562605	-0.232118	0.224773	-0.117345
142.6	-0.0371298	-0.214644	0.224503	-0.136275
142.7	-0.0194056	-0.197555	0.220629	-0.155103
142.8	-0.0025637	-0.181053	0.213285	-0.173549
142.9	0.0134744	-0.165188	0.202689	-0.191274
143	0.0294256	-0.150169	0.189166	-0.208071
143.1	0.045659	-0.136177	0.173118	-0.22372
143.2	0.062565	-0.123237	0.155008	-0.238087
143.3	0.0809709	-0.111568	0.135354	-0.251029
143.4	0.101077	-0.100991	0.114598	-0.262522
143.5	0.123594	-0.0916014	0.093234	-0.272483
143.6	0.148717	-0.083351	0.0716945	-0.280995
143.7	0.176527	-0.0761496	0.0503076	-0.288064
143.8	0.207379	-0.0699303	0.0294	-0.293844
143.9	0.240888	-0.0643673	0.00910984	-0.298355
144	0.277122	-0.0593746	-0.0104117	-0.30175
144.1	0.315542	-0.0547615	-0.0291874	-0.304104
144.2	0.35547	-0.0503716	-0.0472212	-0.305525
144.3	0.396565	-0.0461283	-0.0646823	-0.305993
144.4	0.437775	-0.0417173	-0.0817357	-0.305567
144.5	0.478563	-0.0371328	-0.0986174	-0.304122
144.6	0.517929	-0.0323328	-0.115507	-0.301633
144.7	0.554935	-0.0273	-0.132684	-0.297959
144.8	0.589053	-0.0222175	-0.150315	-0.293024
144.9	0.619271	-0.0169978	-0.168644	-0.286649
145	0.645268	-0.0119518	-0.187777	-0.278698
145.1	0.666405	-0.00726426	-0.207842	-0.269026
145.2	0.682241	-0.00321381	-0.228804	-0.257574
145.3	0.692857	-0.000103478	-0.250629	-0.244271
145.4	0.697991	0.00200148	-0.273141	-0.229138
145.5	0.698018	0.00280562	-0.296149	-0.212178
145.6	0.69308	0.00214301	-0.319356	-0.193534
145.7	0.683437	-5.50146e-05	-0.342392	-0.173354
145.8	0.669868	-0.00390269	-0.364835	-0.151945
145.9	0.652688	-0.00910288	-0.386318	-0.129533
146	0.632785	-0.0155848	-0.406354	-0.106506
146.1	0.610698	-0.0230757	-0.424504	-0.0831582
146.2	0.586916	-0.0312171	-0.440325	-0.0598886
146.3	0.562365	-0.0397206	-0.453417	-0.0370526
146.4	0.537338	-0.0479019	-0.463457	-0.0150457
146.5	0.512628	-0.0554215	-0.470197	0.00586452
146.6	0.488544	-0.0617623	-0.473493	0.0253137
146.7	0.465333	-0.0665428	-0.47327	0.0431359
146.8	0.443551	-0.0694578	-0.469529	0.0591074
146.9	0.423136	-0.0700708	-0.462435	0.0731091
147	0.404457	-0.0682405	-0.452194	0.0850968
147.1	0.387428	-0.063965	-0.439165	0.0950759
147.2	0.37189	-0.0572309	-0.423738	0.103123
147.3	0.358066	-0.0483356	-0.406369	0.109342
147.4	0.345549	-0.0373157	-0.387595	0.113901
147.5	0.334456	-0.0246154	-0.367913	0.117006
147.6	0.32445	-0.010622	-0.347761	0.118854
147.7	0.315198	0.00419546	-0.327635	0.119714
147.8	0.306783	0.0193183	-0.307843	0.119807
147.9	0.298729	0.0344905	-0.288783	0.11946
148	0.29115	0.0492431	-0.27065	0.118882
148.1	0.283682	0.0632022	-0.253611	0.118378
148.2	0.276067	0.0761161	-0.237662	0.118136
148.3	0.268417	0.0876817	-0.222793	0.118419
148.4	0.260409	0.0979329	-0.208881	0.119457
148.5	0.252202	0.106752	-0.195817	0.121452
148.6	0.243653	0.114106	-0.183316	0.12457
148.7	0.234564	0.120071	-0.171222	0.12893
148.8	0.225222	0.124606	-0.159226	0.134642
148.9	0.215396	0.127997	-0.147213	0.141776
149	0.205392	0.130218	-0.134979	0.150347
149.1	0.195195	0.131329	-0.122455	0.160319
149.2	0.184708	0.131411	-0.109565	0.171557
149.3	0.174382	0.130346	-0.0964074	0.183937
149.4	0.163978	0.128327	-0.0831416	0.197183
149.5	0.153963	0.125145	-0.0699712	0.211084
149.6	0.14425	0.120749	-0.0571879	0.2252
149.7	0.134831	0.114945	-0.0451142	0.239189
149.8	0.126004	0.107521	-0.0341691	0.25256
149.9	0.117624	0.09846	-0.0247237	0.264884
150	0.109966	0.087534	-0.0172429	0.275698
150.1	0.102941	0.074527	-0.0120548	0.284493
150.2	0.0963316	0.0593361	-0.00962842	0.290882
150.3	0.0904283	0.0417708	-0.010217	0.294452
150.4	0.084841	0.0219565	-0.0141765	0.294958
150.5	0.0798094	-0.000142792	-0.0216436	0.292137
150.6	0.0750391	-0.0245042	-0.0327556	0.285955
150.7	0.0702642	-0.0509752	-0.0474782	0.276384
150.8	0.0656312	-0.0794677	-0.0656946	0.263549
150.9	0.0607267	-0.109509	-0.0871921	0.247679
151	0.0556875	-0.140903	-0.111621	0.229128
151.1	0.0502629	-0.173818	-0.138555	0.208317
151.2	0.0442655	-0.208745	-0.167476	0.185761
151.3	0.0379216	-0.243669	-0.197815	0.161998
151.4	0.0309609	-0.278261	-0.228956	0.137634
151.5	0.0237359	-0.311952	-0.260214	0.113245
151.6	0.0161847	-0.344301	-0.290916	0.0894332
151.7	0.00831419	-0.374837	-0.320384	0.06677
151.8	0.00062374	-0.403078	-0.348004	0.0457733
151.9	-0.00690913	-0.428825	-0.373257	0.0268942
152	-0.0137089	-0.451677	-0.395645	0.0105482
152.1	-0.0195492	-0.471426	-0.414835	-0.00294064
152.2	-0.0242725	-0.487884	-0.430528	-0.0133129
152.3	-0.027208	-0.500956	-0.442575	-0.0204718
152.4	-0.0283741	-0.51075	-0.450925	-0.0243419
152.5	-0.0271458	-0.517331	-0.455617	-0.0250343
152.6	-0.0234589	-0.520821	-0.456805	-0.0226521
152.7	-0.0172532	-0.52146	-0.454668	-0.0174184
152.8	-0.00819327	-0.519376	-0.449476	-0.00958369
152.9	0.0034923	-0.515029	-0.441509	0.000424098
153	0.01799	-0.508607	-0.431094	0.0122267
153.1	0.0350169	-0.500457	-0.418467	0.0252729
153.2	0.0541583	-0.490857	-0.403977	0.0391507
153.3	0.0754119	-0.480043	-0.387813	0.0532282
153.4	0.0980819	-0.468446	-0.370273	0.0670545
153.5	0.122088	-0.456197	-0.351488	0.0800358
153.6	0.146807	-0.443496	-0.331659	0.0917507
153.7	0.171695	-0.430531	-0.310897	0.101678
153.8	0.196592	-0.417329	-0.289341	0.109523
153.9	0.220879	-0.404136	-0.267069	0.114886
154	0.24449	-0.39093	-0.244213	0.117594
154.1	0.267041	-0.377737	-0.220859	0.117484
154.2	0.288154	-0.364614	-0.197151	0.114586
154.3	0.308031	-0.351515	-0.173217	0.108919
154.4	0.326274	-0.338608	-0.149241	0.100708
154.5	0.343179	-0.325813	-0.125351	0.0901505
154.6	0.358622	-0.313133	-0.101721	0.077644
154.7	0.372481	-0.300586	-0.0785808	0.0635524
154.8	0.385101	-0.288151	-0.0560943	0.0483349
154.9	0.396234	-0.275971	-0.0345449	0.0324333
155	0.406184	-0.264061	-0.0141323	0.0163142
155.1	0.414806	-0.252411	0.00491089	0.000366804
155.2	0.421809	-0.241058	0.0223748	-0.0149684
155.3	0.427388	-0.229955	0.0380349	-0.0294324
155.4	0.431081	-0.21927	0.0516726	-0.042742
155.5	0.433	-0.208907	0.0630711	-0.0547793
155.6	0.432745	-0.198905	0.0720148	-0.0654491
155.7	0.42991	-0.189236	0.0783207	-0.0748715
155.8	0.42455	-0.179841	0.0818157	-0.0831577
155.9	0.416101	-0.170871	0.0823443	-0.0906193
156	0.404678	-0.162301	0.0797924	-0.0975011
156.1	0.389923	-0.154195	0.0740725	-0.10424
156.2	0.371598	-0.146586	0.0651386	-0.111144
156.3	0.34995	-0.13953	0.0529743	-0.118717
156.4	0.324704	-0.133199	0.0376108	-0.12731
156.5	0.296313	-0.1277	0.0191421	-0.137306
156.6	0.264771	-0.123121	-0.00228293	-0.14893
156.7	0.230201	-0.11968	-0.0264908	-0.162417
156.8	0.19318	-0.117376	-0.0532158	-0.177854
156.9	0.153817	-0.116543	-0.082215	-0.195254
157	0.112769	-0.117168	-0.113148	-0.214481
157.1	0.0703112	-0.119346	-0.145722	-0.235341
157.2	0.0267123	-0.123111	-0.179543	-0.257511
157.3	-0.0173322	-0.128361	-0.214242	-0.280678
157.4	-0.0617456	-0.135206	-0.249459	-0.304403
157.5	-0.105903	-0.143402	-0.284829	-0.328297
157.6	-0.149634	-0.152851	-0.319987	-0.351809
157.7	-0.192838	-0.163281	-0.354624	-0.374562
157.8	-0.234913	-0.174433	-0.388387	-0.396087
157.9	-0.276021	-0.186133	-0.421007	-0.416089
158	-0.315619	-0.198086	-0.452148	-0.434255
158.1	-0.353768	-0.209952	-0.481559	-0.450403
158.2	-0.390432	-0.221463	-0.508904	-0.464416
158.3	-0.425207	-0.232291	-0.533918	-0.476217
158.4	-0.458231	-0.242297	-0.556326	-0.485897
158.5	-0.48902	-0.251197	-0.57588	-0.493527
158.6	-0.517546	-0.258729	-0.592279	-0.49931
158.7	-0.543706	-0.264739	-0.605304	-0.503363
158.8	-0.566997	-0.268949	-0.614705	-0.505963
158.9	-0.587381	-0.271392	-0.620291	-0.507264
159	-0.604309	-0.271903	-0.621912	-0.507478
159.1	-0.617634	-0.270412	-0.619417	-0.506736
159.2	-0.627175	-0.266849	-0.61273	-0.505147
159.3	-0.632373	-0.261083	-0.601853	-0.50281
159.4	-0.633258	-0.253261	-0.586907	-0.499676
159.5	-0.629386	-0.243314	-0.568055	-0.495772
159.6	-0.620729	-0.231334	-0.54555	-0.490942
159.7	-0.607426	-0.217388	-0.519697	-0.485131
159.8	-0.589241	-0.20159	-0.490903	-0.478126
159.9	-0.566671	-0.184197	-0.459642	-0.469737
160	-0.539693	-0.165365	-0.426427	-0.459781
160.1	-0.508844	-0.145329	-0.391768	-0.448024
160.2	-0.47471	-0.124357	-0.356228	-0.434303
160.3	-0.437616	-0.102692	-0.320341	-0.418406
160.4	-0.398478	-0.080752	-0.284647	-0.400227
160.5	-0.357728	-0.0587697	-0.249574	-0.379627
160.6	-0.316241	-0.0370506	-0.21552	-0.356571
160.7	-0.274885	-0.0158733	-0.18283	-0.331116
160.8	-0.234068	0.00458237	-0.151739	-0.303348
160.9	-0.194773	0.0239687	-0.122475	-0.273435
161	-0.15734	0.0422317	-0.0951002	-0.241599
161.1	-0.122447	0.0592663	-0.0696827	-0.208179
161.2	-0.0907357	0.0750439	-0.0461478	-0.17357
161.3	-0.0623105	0.0896421	-0.0244395	-0.138216
161.4	-0.0377752	0.103013	-0.00439686	-0.102741
161.5	-0.0170576	0.11534	0.0140989	-0.0677453
161.6	-0.00045412	0.126818	0.0312175	-0.0339147
161.7	0.0118456	0.137662	0.0471384	-0.00192473
161.8	0.0201559	0.148169	0.0619802	0.0274936
161.9	0.0242273	0.158457	0.0758869	0.053668
162	0.024439	0.16882	0.0889314	0.0758962
162.1	0.0207731	0.179484	0.101236	0.0936059
162.2	0.0132574	0.190669	0.112795	0.106248
162.3	0.00237976	0.202646	0.123679	0.113451
162.4	-0.0119166	0.215429	0.13386	0.114931
162.5	-0.0290751	0.229198	0.143329	0.110554
162.6	-0.048984	0.243946	0.15208	0.100284
162.7	-0.0714572	0.259693	0.160089	0.0843332
162.8	-0.0958732	0.276432	0.16737	0.0629627
162.9	-0.122144	0.293888	0.173895	0.0366564
163	-0.149612	0.311937	0.179677	0.0059366
163.1	-0.177961	0.330318	0.184743	-0.0285293
163.2	-0.206928	0.348665	0.189107	-0.0660278
163.3	-0.235764	0.366672	0.192825	-0.105741
163.4	-0.264388	0.38372	0.195919	-0.14686
163.5	-0.292094	0.399404	0.198494	-0.188574
163.6	-0.318652	0.413211	0.200606	-0.230087
163.7	-0.343883	0.424629	0.202387	-0.270617
163.8	-0.367212	0.433213	0.203857	-0.309481
163.9	-0.388733	0.438363	0.205127	-0.346051
164	-0.408034	0.439744	0.206253	-0.379773
164.1	-0.425209	0.437053	0.20735	-0.410163
164.2	-0.440393	0.43006	0.208485	-0.436814
164.3	-0.453424	0.418688	0.209775	-0.459264
164.4	-0.464674	0.402863	0.211251	-0.477408
164.5	-0.474064	0.3828	0.213039	-0.491132
164.6	-0.481918	0.358843	0.215154	-0.500343
164.7	-0.488635	0.331435	0.217691	-0.505029
164.8	-0.494111	0.301214	0.220721	-0.505268
164.9	-0.498924	0.268692	0.224236	-0.501194
165	-0.502901	0.234747	0.22831	-0.493047
165.1	-0.506449	0.200171	0.232949	-0.481114
165.2	-0.509783	0.165835	0.238158	-0.465726
165.3	-0.512734	0.132659	0.243927	-0.447246
165.4	-0.515645	0.101318	0.250225	-0.426064
165.5	-0.518291	0.0725762	0.257048	-0.402658
165.6	-0.520807	0.0471075	0.264376	-0.377528
165.7	-0.523379	0.0254038	0.272168	-0.35114
165.8	-0.525702	0.00793947	0.280418	-0.324
165.9	-0.528054	-0.00518492	0.289057	-0.29651
166	-0.530133	-0.013827	0.298075	-0.269134
166.1	-0.532077	-0.0180212	0.307474	-0.242272
166.2	-0.533977	-0.0179639	0.317297	-0.216302
166.3	-0.535595	-0.0138428	0.327518	-0.191515
166.4	-0.537165	-0.00616948	0.338157	-0.168134
166.5	-0.538455	0.00471774	0.349205	-0.146347
166.6	-0.539567	0.0182829	0.360693	-0.126266
166.7	-0.540697	0.0340815	0.372576	-0.107981
166.8	-0.541502	0.0516342	0.384879	-0.0915038
166.9	-0.542311	0.0704121	0.397517	-0.0767837
167	-0.542803	0.0899835	0.410487	-0.0638203
167.1	-0.543135	0.110007	0.423623	-0.052501
167.2	-0.543473	0.130107	0.43684	-0.0427514
167.3	-0.543473	0.150118	0.450001	-0.0344152
167.4	-0.5455	0.169632	0.462994	-0.0274065
167.5	-0.548802	0.188532	0.475638	-0.0215651
167.6	-0.551886	0.206702	0.487819	-0.0168262
167.7	-0.554669	0.224064	0.499345	-0.0130962
167.8	-0.557171	0.240589	0.510136	-0.0103027
167.9	-0.559317	0.256073	0.520058	-0.00837332
168	-0.561106	0.27053	0.529093	-0.00726789
168.1	-0.56248	0.283916	0.537188	-0.00702076
168.2	-0.563382	0.296169	0.544329	-0.00760714
168.3	-0.563752	0.307311	0.550567	-0.00911471
168.4	-0.56349	0.31713	0.555917	-0.0115321
168.5	-0.562502	0.325616	0.560507	-0.0149719
168.6	-0.560704	0.332719	0.564394	-0.0194436
168.7	-0.55798	0.338415	0.567738	-0.0249547
168.8	-0.554255	0.342761	0.57063	-0.0315301
168.9	-0.549393	0.345628	0.573186	-0.0390802
169	-0.543292	0.347136	0.575468	-0.0476126
169.1	-0.535826	0.347364	0.577598	-0.0569537
169.2	-0.526888	0.346419	0.57954	-0.0669758
169.3	-0.5164	0.344567	0.58137	-0.0774116
169.4	-0.504263	0.341818	0.582982	-0.0879792
169.5	-0.490439	0.338482	0.584371	-0.0983674
169.6	-0.474885	0.334733	0.585462	-0.108246
169.7	-0.457619	0.3308	0.586158	-0.117347
169.8	-0.438628	0.326862	0.586371	-0.125353
169.9	-0.417956	0.322964	0.585999	-0.132045
170	-0.395581	0.319206	0.584967	-0.137169
170.1	-0.371605	0.315558	0.583218	-0.140656
170.2	-0.346053	0.311926	0.580728	-0.142404
170.3	-0.319079	0.308141	0.577501	-0.142468
170.4	-0.290759	0.303812	0.573553	-0.140924
170.5	-0.261273	0.298651	0.568943	-0.137951
170.6	-0.230717	0.292305	0.563734	-0.133844
170.7	-0.199276	0.284273	0.558037	-0.128902
170.8	-0.167061	0.274226	0.551938	-0.123532
170.9	-0.134337	0.261594	0.545526	-0.118021
171	-0.10126	0.246149	0.538927	-0.112814
171.1	-0.0681081	0.227642	0.532277	-0.108245
171.2	-0.0350881	0.205986	0.525565	-0.104635
171.3	-0.00246863	0.181268	0.518777	-0.10226
171.4	0.0295214	0.153571	0.511879	-0.101301
171.5	0.0606036	0.123275	0.504796	-0.101868
171.6	0.090589	0.0908939	0.497431	-0.104011
171.7	0.119235	0.0570271	0.489658	-0.107701
171.8	0.146364	0.0224863	0.481312	-0.112827
171.9	0.171781	-0.0120596	0.472225	-0.119198
172	0.195354	-0.045728	0.46221	-0.126571
172.1	0.216989	-0.0776798	0.451111	-0.134722
172.2	0.236572	-0.107173	0.438838	-0.143317
172.3	0.254026	-0.133413	0.42523	-0.152069
172.4	0.269258	-0.156048	0.410224	-0.160603
172.5	0.282243	-0.174555	0.393816	-0.16862
172.6	0.292898	-0.188751	0.376088	-0.175829
172.7	0.301189	-0.198518	0.357054	-0.181975
172.8	0.306957	-0.203905	0.336907	-0.186769
172.9	0.310136	-0.205267	0.315769	-0.189957
173	0.310594	-0.202993	0.293907	-0.191347
173.1	0.308193	-0.197536	0.271582	-0.190815
173.2	0.302762	-0.189552	0.249048	-0.188245
173.3	0.294206	-0.179576	0.226609	-0.1836
173.4	0.282346	-0.168421	0.204505	-0.176846
173.5	0.267198	-0.156647	0.183049	-0.168041
173.6	0.248683	-0.144856	0.162424	-0.157296
173.7	0.226915	-0.133576	0.142882	-0.144781
173.8	0.201971	-0.123208	0.12454	-0.130724
173.9	0.174104	-0.114219	0.107564	-0.115402
174	0.143625	-0.106805	0.0919647	-0.0991307
174.1	0.111	-0.101159	0.0778076	-0.0823355
174.2	0.0767283	-0.0973403	0.0649532	-0.0654505
174.3	0.0414538	-0.0952982	0.0533646	-0.0490347
174.4	0.00585885	-0.0951016	0.0428124	-0.0335193
174.5	-0.0292764	-0.0965893	0.0331509	-0.0194458
174.6	-0.0631795	-0.0996314	0.0241017	-0.00726819
174.7	-0.095017	-0.104131	0.015434	0.00253857
174.8	-0.124005	-0.109903	0.00682847	0.00957593
174.9	-0.149394	-0.117	-0.00199187	0.0135576
175	-0.170487	-0.125267	-0.0113253	0.0142931
175.1	-0.186768	-0.134691	-0.0213778	0.0117154
175.2	-0.197756	-0.145256	-0.0324049	0.00591051
175.3	-0.203244	-0.156986	-0.0445886	-0.00294798
175.4	-0.203028	-0.170031	-0.0580705	-0.0144787
175.5	-0.197234	-0.184439	-0.0729467	-0.0282468
175.6	-0.186013	-0.200272	-0.0892438	-0.0437086
175.7	-0.169837	-0.2176	-0.106966	-0.0602061
175.8	-0.149222	-0.236367	-0.126012	-0.0771021
175.9	-0.124932	-0.256669	-0.146332	-0.0936301
176	-0.097754	-0.278374	-0.167767	-0.109113
176.1	-0.0686346	-0.301312	-0.190134	-0.122896
176.2	-0.0385137	-0.32523	-0.213175	-0.134387
176.3	-0.00841956	-0.349696	-0.236647	-0.143093
176.4	0.020698	-0.374495	-0.26026	-0.148644
176.5	0.0478663	-0.399064	-0.283767	-0.150789
176.6	0.0723033	-0.422959	-0.306837	-0.149473
176.7	0.093265	-0.445647	-0.329208	-0.144763
176.8	0.110229	-0.466579	-0.350537	-0.136843
176.9	0.122768	-0.485355	-0.370624	-0.126
177	0.13066	-0.501495	-0.389141	-0.112619
177.1	0.133836	-0.514644	-0.40589	-0.0972677
177.2	0.132415	-0.524562	-0.420616	-0.0804362
177.3	0.126703	-0.531046	-0.433173	-0.0628226
177.4	0.117055	-0.534238	-0.443438	-0.0449744
177.5	0.104009	-0.534212	-0.451302	-0.0275345
177.6	0.0881495	-0.531154	-0.456747	-0.0110405
177.7	0.0701289	-0.525445	-0.459788	0.0039752
177.8	0.0506281	-0.517387	-0.460522	0.0170455
177.9	0.0303168	-0.50766	-0.459079	0.0278288
178	0.00980897	-0.496673	-0.455623	0.0359438
178.1	-0.0103174	-0.484966	-0.450356	0.0411691
178.2	-0.0295778	-0.472967	-0.443547	0.0433102
178.3	-0.0476079	-0.461005	-0.435448	0.0422699
178.4	-0.0640989	-0.449568	-0.426389	0.0380233
178.5	-0.0788618	-0.438744	-0.416609	0.0305705
178.6	-0.0918336	-0.428629	-0.406396	0.0199972
178.7	-0.103074	-0.419108	-0.395971	0.00645234
178.8	-0.112738	-0.409993	-0.385564	-0.00990203
178.9	-0.12098	-0.401137	-0.375353	-0.0288333
179	-0.128138	-0.39269	-0.365487	-0.0500477
179.1	-0.134488	-0.383639	-0.356058	-0.0733029
179.2	-0.140399	-0.373544	-0.347123	-0.0982633
179.3	-0.146142	-0.361831	-0.33872	-0.124694
179.4	-0.152096	-0.348346	-0.330781	-0.152205
179.5	-0.158486	-0.332613	-0.323333	-0.180501
179.6	-0.165553	-0.314325	-0.316227	-0.209255
179.7	-0.173417	-0.293346	-0.309429	-0.23811
179.8	-0.182093	-0.269402	-0.30281	-0.266845
179.9	-0.191529	-0.242768	-0.296383	-0.295103
180	-0.201609	-0.21337	-0.290003	-0.322694
180.1	-0.212086	-0.181429	-0.283714	-0.349358
180.2	-0.222643	-0.147118	-0.277485	-0.374938
180.3	-0.232928	-0.11062	-0.271369	-0.399282
180.4	-0.242528	-0.0724249	-0.265425	-0.42227
180.5	-0.251072	-0.0327272	-0.259776	-0.443851
180.6	-0.258099	0.0082007	-0.254532	-0.463986
180.7	-0.263274	0.0500747	-0.249844	-0.482684
180.8	-0.266251	0.0927355	-0.245871	-0.499998
180.9	-0.266806	0.13572	-0.242799	-0.51596
181	-0.264773	0.178885	-0.240789	-0.530676
181.1	-0.260102	0.222002	-0.240023	-0.544181
181.2	-0.252808	0.264832	-0.240611	-0.55657
181.3	-0.243058	0.307285	-0.242637	-0.567892
181.4	-0.231026	0.348804	-0.246141	-0.578191
181.5	-0.217066	0.38924	-0.25116	-0.587473
181.6	-0.201479	0.428268	-0.257625	-0.595765
181.7	-0.184714	0.465517	-0.265471	-0.602991
181.8	-0.167096	0.500768	-0.274557	-0.609143
181.9	-0.149039	0.533332	-0.284724	-0.614069
182	-0.130837	0.562985	-0.295766	-0.61771
182.1	-0.112776	0.589314	-0.307428	-0.61992
182.2	-0.095038	0.611993	-0.319447	-0.620541
182.3	-0.0777364	0.630795	-0.331515	-0.61951
182.4	-0.0608945	0.64527	-0.34337	-0.616684
182.5	-0.0444684	0.655335	-0.354696	-0.612052
182.6	-0.0282903	0.660956	-0.365241	-0.605583
182.7	-0.0121942	0.66207	-0.374673	-0.597329
182.8	0.0040793	0.658916	-0.382724	-0.587342
182.9	0.0207667	0.651409	-0.389156	-0.575825
183	0.0381751	0.639907	-0.393735	-0.56297
183.1	0.0565085	0.624719	-0.396297	-0.549148
183.2	0.0759997	0.606216	-0.396641	-0.534674
183.3	0.0967745	0.584935	-0.394705	-0.51999
183.4	0.118928	0.561082	-0.390393	-0.505434
183.5	0.142461	0.53522	-0.383722	-0.491429
183.6	0.167295	0.507775	-0.374722	-0.478317
183.7	0.193225	0.479152	-0.363528	-0.466458
183.8	0.220035	0.449818	-0.350304	-0.456066
183.9	0.247375	0.419895	-0.335315	-0.4473
184	0.27486	0.389788	-0.318844	-0.440198
184.1	0.302068	0.359741	-0.301293	-0.434763
184.2	0.328571	0.329918	-0.283086	-0.430818
184.3	0.353904	0.300634	-0.264699	-0.428135
184.4	0.377645	0.271745	-0.24663	-0.426284
184.5	0.399394	0.243555	-0.229373	-0.424854
184.6	0.418741	0.216142	-0.213441	-0.423277
184.7	0.435403	0.189626	-0.199229	-0.421041
184.8	0.449138	0.164254	-0.187153	-0.417549
184.9	0.459815	0.139951	-0.177512	-0.412244
185	0.467338	0.117019	-0.170555	-0.404596
185.1	0.471746	0.0957116	-0.166401	-0.394185
185.2	0.473098	0.0762376	-0.165112	-0.380617
185.3	0.471599	0.059042	-0.166567	-0.363707
185.4	0.467439	0.0441495	-0.170635	-0.343294
185.5	0.460926	0.0320169	-0.176991	-0.319411
185.6	0.452341	0.0228445	-0.185313	-0.292203
185.7	0.442026	0.0169394	-0.195198	-0.261928
185.8	0.430273	0.0145696	-0.206205	-0.228991
185.9	0.417442	0.0157064	-0.217874	-0.19387
186	0.403717	0.0204844	-0.229764	-0.157105
186.1	0.389379	0.0288996	-0.241418	-0.119386
186.2	0.374479	0.0407691	-0.252457	-0.081383
186.3	0.359186	0.0559889	-0.262533	-0.0438452
186.4	0.343427	0.0739829	-0.271372	-0.0074023
186.5	0.327194	0.0944354	-0.278768	0.0272172
186.6	0.310358	0.116809	-0.284575	0.0594238
186.7	0.292762	0.14045	-0.288707	0.0886283
186.8	0.274261	0.164862	-0.291159	0.114434
186.9	0.254682	0.189051	-0.291974	0.136467
187	0.233938	0.212465	-0.291235	0.154517
187.1	0.211921	0.234356	-0.289029	0.168467
187.2	0.188663	0.254093	-0.28553	0.178354
187.3	0.164173	0.271127	-0.280898	0.184302
187.4	0.138664	0.28473	-0.275347	0.186622
187.5	0.11234	0.294559	-0.269048	0.185624
187.6	0.085586	0.300338	-0.262254	0.18177
187.7	0.0587973	0.301851	-0.25512	0.17549
187.8	0.0323824	0.299161	-0.247877	0.167425
187.9	0.00686021	0.292113	-0.24066	0.158071
188	-0.0173269	0.280993	-0.23364	0.148045
188.1	-0.0396924	0.266127	-0.226965	0.137821
188.2	-0.059876	0.247924	-0.220737	0.127909
188.3	-0.0775648	0.226959	-0.215054	0.118708
188.4	-0.0925355	0.203575	-0.209957	0.110545
188.5	-0.104683	0.17848	-0.205458	0.103657
188.6	-0.114005	0.152281	-0.201503	0.0981668
188.7	-0.120646	0.125576	-0.198023	0.0941662
188.8	-0.124795	0.0990154	-0.194869	0.0915963
188.9	-0.12679	0.0728867	-0.191897	0.090411
189	-0.126978	0.0477345	-0.188893	0.0904121
189.1	-0.125807	0.0239271	-0.185617	0.0914279
189.2	-0.123742	0.00173129	-0.181851	0.0932676
189.3	-0.121201	-0.018558	-0.177359	0.0956396
189.4	-0.118668	-0.0370345	-0.17196	0.0984044
189.5	-0.116498	-0.0535292	-0.165437	0.101309
189.6	-0.115067	-0.0679983	-0.157629	0.104239
189.7	-0.114621	-0.0804894	-0.148431	0.107054
189.8	-0.115429	-0.0909197	-0.13783	0.109693
189.9	-0.11761	-0.0995618	-0.12586	0.112147
190	-0.121344	-0.106333	-0.112643	0.114396
190.1	-0.126605	-0.111225	-0.0983459	0.116536
190.2	-0.133431	-0.114222	-0.0832405	0.118629
190.3	-0.141671	-0.115163	-0.0675711	0.12081
190.4	-0.15128	-0.114207	-0.0516875	0.123194
190.5	-0.162049	-0.111178	-0.0359221	0.125915
190.6	-0.173817	-0.105977	-0.0206698	0.129067
190.7	-0.186291	-0.0985476	-0.0063025	0.132789
190.8	-0.199181	-0.0887275	0.00679192	0.137168
190.9	-0.212079	-0.0767207	0.0183249	0.142305
191	-0.224646	-0.0624385	0.0279658	0.148261
191.1	-0.236371	-0.0459646	0.0355296	0.15509
191.2	-0.246842	-0.0274481	0.0408026	0.162849
191.3	-0.255505	-0.00698876	0.0437042	0.171532
191.4	-0.26186	0.0149229	0.044165	0.1812
191.5	-0.265366	0.0380496	0.0422569	0.191846
191.6	-0.265475	0.0620574	0.0380542	0.203466
191.7	-0.261687	0.086502	0.0317268	0.216113
191.8	-0.253588	0.111138	0.0235219	0.229763
191.9	-0.240828	0.13527	0.0136448	0.244479
192	-0.223177	0.158677	0.00243268	0.260203
192.1	-0.20053	0.180984	-0.00984186	0.276935
192.2	-0.172886	0.201913	-0.0228526	0.294577
192.3	-0.140408	0.221293	-0.0362837	0.313022
192.4	-0.103404	0.23877	-0.0498934	0.332087
192.5	-0.0622964	0.254298	-0.0634039	0.351566
192.6	-0.0176511	0.26788	-0.0766322	0.371158
192.7	0.0298495	0.279498	-0.0894408	0.390539
192.8	0.0794501	0.289386	-0.101747	0.40929
192.9	0.13031	0.297357	-0.113529	0.427048
193	0.181623	0.303732	-0.124861	0.44331
193.1	0.232557	0.30867	-0.135822	0.457656
193.2	0.282371	0.312427	-0.146567	0.469589
193.3	0.33032	0.315259	-0.157329	0.47875
193.4	0.375799	0.317119	-0.168272	0.484776
193.5	0.418268	0.31824	-0.179668	0.487453
193.6	0.457386	0.318723	-0.191685	0.486552
193.7	0.492868	0.318589	-0.204572	0.482113
193.8	0.524631	0.317969	-0.218418	0.474174
193.9	0.552604	0.316538	-0.233401	0.463015
194	0.576953	0.314293	-0.249535	0.448901
194.1	0.597816	0.311104	-0.266848	0.432316
194.2	0.615449	0.306769	-0.285179	0.413757
194.3	0.630079	0.301214	-0.304418	0.393822
194.4	0.642007	0.294014	-0.324268	0.373133
194.5	0.651473	0.285124	-0.344504	0.352342
194.6	0.658742	0.274448	-0.364732	0.331999
194.7	0.663978	0.261938	-0.384583	0.312627
194.8	0.667297	0.247725	-0.403656	0.294644
194.9	0.668767	0.231696	-0.421561	0.278432
195	0.668333	0.214128	-0.437919	0.264176
195.1	0.66599	0.195357	-0.452387	0.251993
195.2	0.661573	0.175696	-0.464608	0.241832
195.3	0.655012	0.155733	-0.474341	0.233534
195.4	0.646112	0.135666	-0.481368	0.226871
195.5	0.63482	0.116114	-0.485579	0.221482
195.6	0.620967	0.0975116	-0.486888	0.216945
195.7	0.604574	0.0803303	-0.485368	0.212863
195.8	0.585695	0.0650611	-0.481155	0.208738
195.9	0.564474	0.0518223	-0.474434	0.204236
196	0.541126	0.0409523	-0.465445	0.198935
196.1	0.515962	0.0325887	-0.454473	0.192527
196.2	0.489398	0.0267522	-0.441883	0.184773
196.3	0.461952	0.0234555	-0.428022	0.175502
196.4	0.434127	0.0222844	-0.413336	0.164668
196.5	0.406539	0.0230455	-0.398216	0.152266
196.6	0.37972	0.0254698	-0.383085	0.13836
196.7	0.354295	0.0291033	-0.36832	0.123089
196.8	0.330726	0.0337259	-0.354262	0.106618
196.9	0.30949	0.0386164	-0.341211	0.0892091
197	0.290937	0.0435565	-0.329455	0.0710599
197.1	0.2753	0.0481246	-0.31922	0.0524796
197.2	0.262729	0.0520538	-0.310665	0.0336856
197.3	0.253149	0.0551619	-0.303878	0.0149833
197.4	0.246499	0.0569988	-0.298882	-0.00342341
197.5	0.242481	0.0575138	-0.295707	-0.0212808
197.6	0.240835	0.0565716	-0.294239	-0.0384535
197.7	0.241111	0.0541569	-0.294377	-0.0547374
197.8	0.242891	0.0502994	-0.295916	-0.070016
197.9	0.245696	0.0448082	-0.298678	-0.0841217
198	0.249086	0.0377034	-0.302349	-0.0969418
198.1	0.252643	0.0290574	-0.306668	-0.108419
198.2	0.255983	0.0188284	-0.311261	-0.118411
198.3	0.258817	0.00714121	-0.315844	-0.126941
198.4	0.260929	-0.00628076	-0.320047	-0.133852
198.5	0.262193	-0.0213221	-0.32354	-0.139152
198.6	0.26258	-0.0379865	-0.325898	-0.142826
198.7	0.2621	-0.0563256	-0.32683	-0.144935
198.8	0.260869	-0.0762068	-0.325948	-0.145553
198.9	0.259048	-0.0979238	-0.322977	-0.144738
199	0.2569	-0.121338	-0.317643	-0.142715
199.1	0.254608	-0.146468	-0.309709	-0.13966
199.2	0.252473	-0.173222	-0.298998	-0.135896
199.3	0.250673	-0.201385	-0.285414	-0.131681
199.4	0.249431	-0.231055	-0.268954	-0.127305
199.5	0.248895	-0.261838	-0.249668	-0.123123
199.6	0.249185	-0.293515	-0.227738	-0.119435
199.7	0.250341	-0.325729	-0.203332	-0.116592
[truncated: 5,003 more rows]

## Sheet: 16d13012.abf
	Current (pA)
time (ms)	10uM cocaine	30uM cocaine	100uM cocaine	300uM cocaine
0		-0.0635377	-0.0737763	0.132018
0.0996094		-0.0762854	-0.0584381	0.140105
0.200195		-0.089245	-0.0435892	0.148575
0.299805		-0.102094	-0.0295514	0.157452
0.400391		-0.114597	-0.0165871	0.1668
0.5		-0.126482	-0.00489581	0.176689
0.599609		-0.137553	0.00536198	0.187163
0.700195		-0.147594	0.0141589	0.198274
0.799805		-0.156421	0.0214865	0.210005
0.900391		-0.163864	0.0274468	0.222352
1		-0.169778	0.0321459	0.235303
1.09961		-0.174064	0.0357327	0.248767
1.2002		-0.176618	0.038396	0.26263
1.2998		-0.177417	0.040355	0.276718
1.40039		-0.176411	0.0418258	0.290875
1.5		-0.173608	0.0429465	0.304868
1.59961		-0.169022	0.0438869	0.318418
1.7002		-0.162717	0.0447495	0.331253
1.7998		-0.154757	0.0456236	0.34307
1.90039		-0.1452	0.0465111	0.353627
2		-0.134178	0.0474091	0.362648
2.09961		-0.121815	0.0482243	0.369935
2.2002		-0.108327	0.04887	0.375288
2.2998		-0.0939102	0.0492267	0.378589
2.40039		-0.0788118	0.0491446	0.379778
2.5		-0.0632745	0.0484546	0.378847
2.59961		-0.0475745	0.0469959	0.375896
2.7002		-0.0320244	0.0446241	0.371049
2.7998		-0.0168707	0.0412194	0.364509
2.90039		-0.00239156	0.0367291	0.356491
3		0.0111777	0.0311159	0.347256
3.09961		0.0236079	0.0244233	0.337101
3.2002		0.0347512	0.0167209	0.326346
3.2998		0.0444789	0.00815869	0.315289
3.40039		0.052721	-0.00107594	0.304172
3.5		0.0594603	-0.0107618	0.29321
3.59961		0.0647116	-0.0206582	0.282596
3.7002		0.0685641	-0.0304581	0.272504
3.7998		0.0711302	-0.0398593	0.263059
3.90039		0.0725581	-0.0485493	0.254326
4		0.0730247	-0.0562484	0.246358
4.09961		0.0727127	-0.062711	0.239174
4.2002		0.0718367	-0.067722	0.23275
4.2998		0.0705854	-0.0711189	0.227014
4.40039		0.0691466	-0.0727894	0.221863
4.5		0.0676365	-0.0727006	0.217177
4.59961		0.0661741	-0.0708428	0.212847
4.7002		0.0648299	-0.0672901	0.208769
4.7998		0.0636924	-0.0621292	0.20481
4.90039		0.062804	-0.0555049	0.200866
5		0.0622159	-0.0475582	0.196798
5.09961		0.061907	-0.0385127	0.192501
5.2002		0.0619149	-0.0285884	0.187871
5.2998		0.0622366	-0.0179926	0.182854
5.40039		0.0629316	-0.00691123	0.177385
5.5		0.0640153	0.00445906	0.171399
5.59961		0.0655397	0.015934	0.164887
5.7002		0.067512	0.0273536	0.157855
5.7998		0.0699897	0.038586	0.150355
5.90039		0.0729678	0.0494936	0.142422
6		0.0765008	0.0599378	0.134199
6.09961		0.0805903	0.0698238	0.125774
6.2002		0.0852461	0.0790341	0.117277
6.2998		0.0903678	0.0875028	0.108829
6.40039		0.095862	0.095137	0.100633
6.5		0.101596	0.101921	0.0928564
6.59961		0.107426	0.107805	0.08566
6.7002		0.113146	0.11276	0.0791903
6.7998		0.118537	0.116792	0.0735742
6.90039		0.123342	0.119904	0.0689464
7		0.127302	0.122175	0.0654162
7.09961		0.130156	0.123696	0.0630697
7.2002		0.131671	0.124611	0.0619131
7.2998		0.131625	0.12508	0.0619604
7.40039		0.129843	0.125253	0.0631636
7.5		0.12619	0.12534	0.0654798
7.59961		0.120595	0.125525	0.0687984
7.7002		0.113083	0.126016	0.0730082
7.7998		0.103738	0.127001	0.0779927
7.90039		0.0927076	0.128634	0.0835882
8		0.0802251	0.131066	0.0896033
8.09961		0.0665901	0.134403	0.0958417
8.2002		0.0521445	0.138685	0.102102
8.2998		0.0372834	0.143922	0.10819
8.40039		0.022472	0.150049	0.113937
8.5		0.00818135	0.156964	0.119175
8.59961		-0.00512236	0.164518	0.123777
8.7002		-0.0169634	0.172529	0.127593
8.7998		-0.0269517	0.18079	0.13053
8.90039		-0.0347296	0.189023	0.132493
9		-0.0399844	0.196974	0.13344
9.09961		-0.042459	0.204349	0.133337
9.2002		-0.0420119	0.210884	0.132143
9.2998		-0.0385831	0.216342	0.129856
9.40039		-0.0322102	0.220521	0.12644
9.5		-0.0230148	0.223278	0.121947
9.59961		-0.0111778	0.224443	0.116419
9.7002		0.00301896	0.22396	0.109908
9.7998		0.0192265	0.22181	0.102455
9.90039		0.0370076	0.218049	0.0940687
10		0.0559651	0.212745	0.0848191
10.0996		0.0756363	0.206048	0.07478
10.2002		0.0955942	0.19814	0.0640577
10.2998		0.115356	0.18922	0.0527847
10.4004		0.134524	0.179542	0.041052
10.5		0.152695	0.169335	0.0290125
10.5996		0.16952	0.158901	0.0167625
10.7002		0.184703	0.148502	0.00447131
10.7998		0.19797	0.138436	-0.0076961
10.9004		0.209171	0.12897	-0.0195732
11		0.21818	0.120356	-0.0309921
11.0996		0.224951	0.112754	-0.0418343
11.2002		0.229449	0.106313	-0.0519891
11.2998		0.231748	0.10118	-0.0613769
11.4004		0.23194	0.0974521	-0.0699396
11.5		0.230169	0.0952055	-0.0776542
11.5996		0.226599	0.0944196	-0.0845309
11.7002		0.22142	0.095038	-0.0906039
11.7998		0.21487	0.0969397	-0.0959794
11.9004		0.207178	0.0999925	-0.10077
12		0.198581	0.103991	-0.105164
12.0996		0.189276	0.108706	-0.109353
12.2002		0.179469	0.113855	-0.113494
12.2998		0.169345	0.119136	-0.117719
12.4004		0.159084	0.12425	-0.122164
12.5		0.148819	0.1289	-0.127013
12.5996		0.138643	0.132821	-0.132443
12.7002		0.128664	0.135758	-0.138596
12.7998		0.11893	0.137514	-0.145548
12.9004		0.109484	0.137962	-0.153333
13		0.100301	0.136998	-0.161965
13.0996		0.0914261	0.134643	-0.171422
13.2002		0.0828621	0.130955	-0.181662
13.2998		0.0746178	0.126098	-0.192595
13.4004		0.0666756	0.12027	-0.204104
13.5		0.0590325	0.11376	-0.216055
13.5996		0.0517054	0.106854	-0.228293
13.7002		0.0447354	0.0998876	-0.240654
13.7998		0.0381642	0.0932041	-0.252982
13.9004		0.0320544	0.0871339	-0.265139
14		0.0264459	0.082008	-0.276991
14.0996		0.021419	0.0780951	-0.288424
14.2002		0.0170188	0.0756	-0.299345
14.2998		0.013321	0.0746136	-0.309713
14.4004		0.0103569	0.0751982	-0.319514
14.5		0.00818126	0.0772847	-0.328754
14.5996		0.00680346	0.0807792	-0.337438
14.7002		0.00627648	0.0855015	-0.345555
14.7998		0.00658859	0.0912194	-0.353136
14.9004		0.00777423	0.0976185	-0.360237
15		0.00979133	0.104351	-0.366915
15.0996		0.0126038	0.110999	-0.373173
15.2002		0.0161202	0.117191	-0.378969
15.2998		0.0203144	0.122542	-0.384224
15.4004		0.0250889	0.126719	-0.388854
15.5		0.0303605	0.129361	-0.392742
15.5996		0.0359784	0.130211	-0.395719
15.7002		0.0418118	0.129036	-0.397609
15.7998		0.0476909	0.125635	-0.398167
15.9004		0.0534831	0.119905	-0.397147
16		0.0590012	0.111786	-0.394291
16.0996		0.0641031	0.10131	-0.38936
16.2002		0.0686126	0.0885567	-0.382105
16.2998		0.0723513	0.0736932	-0.372317
16.4004		0.0751423	0.0569642	-0.359833
16.5		0.0768686	0.0386471	-0.344557
16.5996		0.07742	0.0190419	-0.32642
16.7002		0.0767076	-0.00153529	-0.305426
16.7998		0.0746582	-0.0227236	-0.281624
16.9004		0.071228	-0.04415	-0.255209
17		0.0663876	-0.0654023	-0.226448
17.0996		0.0601345	-0.0861078	-0.195656
17.2002		0.0524915	-0.105917	-0.163223
17.2998		0.0435143	-0.124508	-0.129614
17.4004		0.0332407	-0.141633	-0.0953387
17.5		0.0217233	-0.157078	-0.060961
17.5996		0.00900894	-0.170691	-0.0270681
17.7002		-0.00484152	-0.182394	0.00574111
17.7998		-0.0197651	-0.19215	0.0368919
17.9004		-0.0356892	-0.200013	0.0658873
18		-0.052544	-0.206063	0.0922382
18.0996		-0.0702457	-0.210494	0.115539
18.2002		-0.0886997	-0.213513	0.135449
18.2998		-0.107801	-0.215364	0.151777
18.4004		-0.127415	-0.21634	0.164428
18.5		-0.147418	-0.216721	0.173433
18.5996		-0.167615	-0.216839	0.178931
18.7002		-0.187797	-0.216952	0.181189
18.7998		-0.207685	-0.217331	0.180567
18.9004		-0.227053	-0.218212	0.177507
19		-0.24565	-0.219774	0.172519
19.0996		-0.263225	-0.222116	0.166169
19.2002		-0.279506	-0.225277	0.159048
19.2998		-0.294238	-0.229294	0.151709
19.4004		-0.307187	-0.23409	0.144725
19.5		-0.31818	-0.239538	0.138618
19.5996		-0.327097	-0.24543	0.133832
19.7002		-0.333839	-0.251555	0.130712
19.7998		-0.338399	-0.257672	0.129522
19.9004		-0.340776	-0.263515	0.13046
20		-0.341044	-0.26881	0.133614
20.0996		-0.339286	-0.273254	0.138945
20.2002		-0.335637	-0.276596	0.14632
20.2998		-0.330252	-0.27861	0.155538
20.4004		-0.323325	-0.279141	0.166365
20.5		-0.315057	-0.278042	0.178556
20.5996		-0.30565	-0.275241	0.191795
20.7002		-0.295322	-0.270703	0.205752
20.7998		-0.284195	-0.264465	0.220052
20.9004		-0.272427	-0.256643	0.23435
21		-0.260134	-0.247359	0.248352
21.0996		-0.247438	-0.23681	0.261759
21.2002		-0.234401	-0.22517	0.274366
21.2998		-0.221043	-0.212705	0.285976
21.4004		-0.207387	-0.199688	0.296452
21.5		-0.193419	-0.18643	0.305722
21.5996		-0.179151	-0.173202	0.313746
21.7002		-0.164552	-0.160271	0.320535
21.7998		-0.149631	-0.147909	0.326127
21.9004		-0.134366	-0.136365	0.330635
22		-0.118751	-0.125922	0.334146
22.0996		-0.102794	-0.11678	0.336801
22.2002		-0.0864851	-0.109107	0.338757
22.2998		-0.0698472	-0.102978	0.340158
22.4004		-0.0528729	-0.0985089	0.341152
22.5		-0.0356282	-0.0957478	0.34184
22.5996		-0.0181409	-0.0947153	0.342318
22.7002		-0.000479728	-0.0953508	0.342644
22.7998		0.0173171	-0.0975521	0.342899
22.9004		0.0351889	-0.101181	0.343148
23		0.0530795	-0.106073	0.343412
23.0996		0.070931	-0.112021	0.343714
23.2002		0.0886799	-0.118769	0.344013
23.2998		0.106261	-0.126038	0.344276
23.4004		0.12361	-0.133505	0.344461
23.5		0.140619	-0.140868	0.344547
23.5996		0.157216	-0.147836	0.344512
23.7002		0.173275	-0.154128	0.344348
23.7998		0.188702	-0.159429	0.344036
23.9004		0.203353	-0.163481	0.343542
24		0.217124	-0.166044	0.34288
24.0996		0.229855	-0.166951	0.342044
24.2002		0.241455	-0.166057	0.341025
24.2998		0.251841	-0.163289	0.339824
24.4004		0.260937	-0.158606	0.338434
24.5		0.26869	-0.152011	0.336864
24.5996		0.275082	-0.143552	0.335092
24.7002		0.280131	-0.133325	0.333136
24.7998		0.283887	-0.121474	0.330945
24.9004		0.286427	-0.108155	0.328553
25		0.287828	-0.0935959	0.325959
25.0996		0.288203	-0.0779695	0.32319
25.2002		0.287643	-0.0615044	0.320269
25.2998		0.286272	-0.0443955	0.317235
25.4004		0.284183	-0.0268511	0.31418
25.5		0.281476	-0.00904977	0.311173
25.5996		0.278172	0.00881284	0.30834
25.7002		0.27429	0.0265704	0.305786
25.7998		0.269787	0.0440415	0.30365
25.9004		0.264658	0.061118	0.301997
26		0.258832	0.0776502	0.300898
26.0996		0.25227	0.0935256	0.300419
26.2002		0.244893	0.108594	0.300593
26.2998		0.236681	0.122719	0.301386
26.4004		0.227568	0.135816	0.302741
26.5		0.217569	0.147795	0.304552
26.5996		0.20669	0.158611	0.306646
26.7002		0.194997	0.168126	0.308817
26.7998		0.182568	0.17627	0.310819
26.9004		0.169598	0.183011	0.312415
27		0.156265	0.188336	0.313331
27.0996		0.142788	0.192252	0.31329
27.2002		0.129374	0.194792	0.312037
27.2998		0.116279	0.196062	0.30932
27.4004		0.103743	0.196172	0.30492
27.5		0.0920447	0.195248	0.298658
27.5996		0.0814284	0.1935	0.290428
27.7002		0.0721201	0.191128	0.280147
27.7998		0.0643114	0.188407	0.267832
27.9004		0.0581836	0.185579	0.253506
28		0.0538657	0.182862	0.23729
28.0996		0.0514777	0.180479	0.219309
28.2002		0.0511082	0.178653	0.199747
28.2998		0.0528213	0.177574	0.178792
28.4004		0.0566602	0.177411	0.156687
28.5		0.0626305	0.178243	0.133689
28.5996		0.0707015	0.180159	0.11013
28.7002		0.0807947	0.18316	0.0863097
28.7998		0.09279	0.187227	0.0625296
28.9004		0.106578	0.192292	0.0390866
29		0.122031	0.198216	0.0162524
29.0996		0.138951	0.204868	-0.00566312
29.2002		0.157108	0.212052	-0.0264223
29.2998		0.176207	0.219605	-0.0457723
29.4004		0.195969	0.227334	-0.063498
29.5		0.216058	0.235074	-0.0794105
29.5996		0.236161	0.242654	-0.0933516
29.7002		0.255937	0.249929	-0.105261
29.7998		0.275055	0.256816	-0.115114
29.9004		0.293174	0.263221	-0.122965
30		0.309922	0.26911	-0.128887
30.0996		0.324966	0.274419	-0.133042
30.2002		0.338018	0.279171	-0.135673
30.2998		0.348839	0.283367	-0.136995
30.4004		0.357165	0.287076	-0.137305
30.5		0.362838	0.290366	-0.136917
30.5996		0.365727	0.293279	-0.136212
30.7002		0.365783	0.295847	-0.135558
30.7998		0.362977	0.29809	-0.135258
30.9004		0.357321	0.300079	-0.135612
31		0.348883	0.301817	-0.136822
31.0996		0.337778	0.303332	-0.139064
31.2002		0.324207	0.304576	-0.142418
31.2998		0.308372	0.305522	-0.146907
31.4004		0.290576	0.306095	-0.15245
31.5		0.271139	0.306263	-0.158882
31.5996		0.250386	0.306	-0.166022
31.7002		0.22866	0.305294	-0.173627
31.7998		0.206362	0.30413	-0.1814
31.9004		0.183897	0.302468	-0.189014
32		0.161654	0.300296	-0.196136
32.0996		0.140028	0.297643	-0.202483
32.2002		0.11935	0.294544	-0.207802
32.2998		0.0999257	0.29103	-0.211901
32.4004		0.0820178	0.287135	-0.214628
32.5		0.0658532	0.282924	-0.215933
32.5996		0.0515578	0.278435	-0.215835
32.7002		0.0391951	0.273718	-0.214404
32.7998		0.0287491	0.268781	-0.211749
32.9004		0.0201152	0.263637	-0.208021
33		0.0131638	0.258274	-0.203431
33.0996		0.00764508	0.252684	-0.198181
33.2002		0.00328872	0.246861	-0.192503
33.2998		-0.000282668	0.240774	-0.18662
33.4004		-0.00343513	0.234412	-0.180746
33.5		-0.0065931	0.22772	-0.175039
33.5996		-0.010129	0.220687	-0.169631
33.7002		-0.0144136	0.213279	-0.164602
33.7998		-0.0198043	0.205525	-0.159983
33.9004		-0.026626	0.197423	-0.155764
34		-0.0351352	0.189037	-0.151907
34.0996		-0.0454976	0.180428	-0.148386
34.2002		-0.057801	0.171714	-0.14513
34.2998		-0.0720557	0.162979	-0.142061
34.4004		-0.0881964	0.154315	-0.139074
34.5		-0.106093	0.145793	-0.136081
34.5996		-0.125528	0.137481	-0.133012
34.7002		-0.146245	0.129446	-0.129798
34.7998		-0.167909	0.121702	-0.126412
34.9004		-0.190176	0.114229	-0.122829
35		-0.212624	0.106965	-0.119074
35.0996		-0.234843	0.0998191	-0.115179
35.2002		-0.256414	0.0926289	-0.111189
35.2998		-0.276952	0.0851975	-0.107108
35.4004		-0.296061	0.0772953	-0.102994
35.5		-0.313431	0.0687315	-0.0989046
35.5996		-0.328777	0.0592331	-0.0948989
35.7002		-0.341914	0.0486085	-0.0910215
35.7998		-0.352669	0.0366214	-0.0873493
35.9004		-0.360943	0.0231146	-0.0839287
36		-0.366679	0.00801007	-0.0807708
36.0996		-0.369917	-0.00870992	-0.0778808
36.2002		-0.370758	-0.0270033	-0.0752632
36.2998		-0.369364	-0.0467716	-0.0729327
36.4004		-0.365916	-0.0678106	-0.070898
36.5		-0.360613	-0.0898375	-0.0691511
36.5996		-0.353689	-0.112522	-0.0676742
36.7002		-0.345375	-0.135463	-0.0664491
36.7998		-0.335907	-0.158217	-0.0654038
36.9004		-0.325514	-0.180345	-0.0644833
37		-0.314401	-0.201436	-0.0636132
37.0996		-0.302723	-0.221099	-0.0627344
37.2002		-0.290589	-0.239011	-0.0617588
37.2998		-0.278077	-0.254906	-0.0606029
37.4004		-0.265257	-0.268599	-0.059198
37.5		-0.252158	-0.280008	-0.0574819
37.5996		-0.238776	-0.289132	-0.0553748
37.7002		-0.225137	-0.296132	-0.0527494
37.7998		-0.21124	-0.301245	-0.0495698
37.9004		-0.197136	-0.304765	-0.0458027
38		-0.182842	-0.307054	-0.041473
38.0996		-0.168461	-0.308512	-0.0365998
38.2002		-0.154101	-0.309608	-0.0312486
38.2998		-0.139918	-0.310765	-0.0255259
38.4004		-0.126073	-0.312401	-0.0195522
38.5		-0.112796	-0.314862	-0.013437
38.5996		-0.100317	-0.318388	-0.00733766
38.7002		-0.0888547	-0.323161	-0.00142797
38.7998		-0.078625	-0.329231	0.0040639
38.9004		-0.0698099	-0.336612	0.00896032
39		-0.0625755	-0.34514	0.0131066
39.0996		-0.0570224	-0.354578	0.0163578
39.2002		-0.053254	-0.364606	0.018638
39.2998		-0.0512661	-0.374861	0.0198921
39.4004		-0.0510404	-0.384962	0.0201437
39.5		-0.0524502	-0.394511	0.019403
39.5996		-0.0553708	-0.403162	0.01778
39.7002		-0.0596021	-0.410572	0.0154211
39.7998		-0.064943	-0.416493	0.0125103
39.9004		-0.0711389	-0.420717	0.00929323
40		-0.0779609	-0.423163	0.00601391
40.0996		-0.0852006	-0.423849	0.00296227
40.2002		-0.0926494	-0.42288	0.000462312
40.2998		-0.10013	-0.420463	-0.00119174
40.4004		-0.107478	-0.416863	-0.00170493
40.5		-0.114596	-0.41243	-0.000769018
40.5996		-0.12135	-0.40749	0.00185722
40.7002		-0.1277	-0.402411	0.00638718
40.7998		-0.133613	-0.397517	0.0129934
40.9004		-0.13909	-0.393126	0.0218042
41		-0.144127	-0.389468	0.032917
41.0996		-0.148709	-0.38672	0.0463287
41.2002		-0.152852	-0.384983	0.0620253
41.2998		-0.156551	-0.384222	0.0799174
41.4004		-0.159851	-0.38432	0.0998666
41.5		-0.162755	-0.385047	0.121662
41.5996		-0.165307	-0.386119	0.145031
41.7002		-0.167525	-0.387155	0.16968
41.7998		-0.169437	-0.387742	0.195216
41.9004		-0.171073	-0.387433	0.221291
42		-0.172455	-0.385812	0.247535
42.0996		-0.173629	-0.3825	0.273566
42.2002		-0.174625	-0.377127	0.298972
42.2998		-0.175503	-0.369365	0.32334
42.4004		-0.176274	-0.358952	0.346326
42.5		-0.176976	-0.345771	0.367592
42.5996		-0.177599	-0.329791	0.386873
42.7002		-0.178111	-0.311075	0.403904
42.7998		-0.178454	-0.289769	0.41851
42.9004		-0.178554	-0.266143	0.430566
43		-0.178334	-0.24054	0.440018
43.0996		-0.177675	-0.213356	0.446856
43.2002		-0.17644	-0.185004	0.451105
43.2998		-0.174446	-0.155934	0.452853
43.4004		-0.171504	-0.126625	0.452243
43.5		-0.167412	-0.0975337	0.449481
43.5996		-0.161994	-0.0690754	0.444795
43.7002		-0.155088	-0.0416049	0.438439
43.7998		-0.146532	-0.0154146	0.430715
43.9004		-0.13624	0.00927131	0.421926
44		-0.124127	0.0322244	0.412398
44.0996		-0.110178	0.0533154	0.402453
44.2002		-0.0944088	0.072494	0.392414
44.2998		-0.0768706	0.0897851	0.3826
44.4004		-0.0576922	0.10519	0.373276
44.5		-0.0370651	0.118774	0.364681
44.5996		-0.0152271	0.130608	0.356985
44.7002		0.0075684	0.140779	0.350356
44.7998		0.0310103	0.149333	0.344856
44.9004		0.0547941	0.156347	0.340509
45		0.0785587	0.161885	0.337233
45.0996		0.10195	0.166001	0.334921
45.2002		0.124592	0.168767	0.333392
45.2998		0.146181	0.170216	0.332414
45.4004		0.166409	0.170393	0.331731
45.5		0.184998	0.169326	0.331043
45.5996		0.20167	0.167078	0.33006
45.7002		0.216257	0.163737	0.328454
45.7998		0.228636	0.159406	0.325968
45.9004		0.238742	0.154204	0.322315
46		0.246548	0.148304	0.317282
46.0996		0.252112	0.141876	0.310685
46.2002		0.255497	0.135132	0.302418
46.2998		0.256815	0.128271	0.292404
46.4004		0.25622	0.121525	0.280608
46.5		0.253939	0.115141	0.267074
46.5996		0.25022	0.109321	0.251903
46.7002		0.245326	0.104289	0.235237
46.7998		0.239505	0.100234	0.217259
46.9004		0.233018	0.0973693	0.198196
47		0.226124	0.0958277	0.178254
47.0996		0.219073	0.0956883	0.1577
47.2002		0.212089	0.0970325	0.136782
47.2998		0.205389	0.0998575	0.115768
47.4004		0.199162	0.104156	0.0949063
47.5		0.193583	0.109861	0.0744585
47.5996		0.188798	0.116848	0.0546839
47.7002		0.184933	0.124964	0.0357935
47.7998		0.18208	0.133999	0.0180049
47.9004		0.180306	0.143724	0.0014625
48		0.179636	0.153922	-0.0136937
48.0996		0.180077	0.164342	-0.0273894
48.2002		0.181574	0.174713	-0.0395668
48.2998		0.184043	0.184755	-0.0502002
48.4004		0.187359	0.194211	-0.0593327
48.5		0.191393	0.202859	-0.0670493
48.5996		0.195954	0.210474	-0.0734309
48.7002		0.200837	0.216893	-0.0786297
48.7998		0.205812	0.221961	-0.0828164
48.9004		0.210627	0.225644	-0.0861879
49		0.215025	0.227939	-0.088947
49.0996		0.218751	0.228881	-0.091276
49.2002		0.221626	0.228571	-0.0933898
49.2998		0.223457	0.227142	-0.095428
49.4004		0.224126	0.224803	-0.0975286
49.5		0.223546	0.221757	-0.0997909
49.5996		0.221704	0.218263	-0.102275
49.7002		0.218609	0.214565	-0.105031
49.7998		0.214349	0.210948	-0.107998
49.9004		0.20908	0.207675	-0.111144
50		0.203015	0.204989	-0.114401
50.0996		0.196433	0.203127	-0.117646
50.2002		0.189622	0.202221	-0.120737
50.2998		0.182945	0.202397	-0.123509
50.4004		0.176705	0.203694	-0.125854
50.5		0.171235	0.206166	-0.127637
50.5996		0.166796	0.20976	-0.128775
50.7002		0.163656	0.214395	-0.129243
50.7998		0.162015	0.219941	-0.129016
50.9004		0.162055	0.226237	-0.128141
51		0.163876	0.233107	-0.126702
51.0996		0.167475	0.240341	-0.124827
51.2002		0.172777	0.247742	-0.122678
51.2998		0.179599	0.255074	-0.120443
51.4004		0.187712	0.262186	-0.118371
51.5		0.196826	0.268919	-0.116702
51.5996		0.206626	0.275139	-0.115628
51.7002		0.21674	0.280699	-0.115342
51.7998		0.226763	0.285519	-0.115978
51.9004		0.236301	0.289554	-0.117665
52		0.244929	0.292794	-0.120466
52.0996		0.252278	0.295217	-0.124393
52.2002		0.257974	0.296806	-0.129385
52.2998		0.261701	0.297618	-0.135324
52.4004		0.263178	0.297718	-0.142048
52.5		0.262209	0.297175	-0.149329
52.5996		0.258626	0.296043	-0.156924
52.7002		0.252342	0.294384	-0.16457
52.7998		0.243341	0.292294	-0.171988
52.9004		0.23164	0.289829	-0.178909
53		0.217341	0.287066	-0.185049
53.0996		0.200579	0.284046	-0.190191
53.2002		0.181586	0.280851	-0.194129
53.2998		0.160565	0.27753	-0.196711
53.4004		0.137783	0.274133	-0.197822
53.5		0.113544	0.270682	-0.197426
53.5996		0.0882275	0.267172	-0.195526
53.7002		0.0622375	0.263569	-0.192172
53.7998		0.0359789	0.259814	-0.18751
53.9004		0.00989222	0.255812	-0.181677
54		-0.0156256	0.251416	-0.174862
54.0996		-0.0401774	0.246509	-0.167253
54.2002		-0.0633597	0.240951	-0.159096
54.2998		-0.0847808	0.234603	-0.150617
54.4004		-0.104096	0.227261	-0.142056
54.5		-0.121025	0.218764	-0.133668
54.5996		-0.135337	0.208968	-0.125677
54.7002		-0.146894	0.197787	-0.11828
54.7998		-0.155572	0.185127	-0.111655
54.9004		-0.161372	0.170954	-0.105971
55		-0.164342	0.15526	-0.101305
55.0996		-0.164674	0.138137	-0.0977601
55.2002		-0.162582	0.119691	-0.0953668
55.2998		-0.158397	0.10011	-0.0941535
55.4004		-0.152435	0.0795799	-0.0940743
55.5		-0.14511	0.0583494	-0.095056
55.5996		-0.136826	0.0367273	-0.0969928
55.7002		-0.128039	0.0149913	-0.0997484
55.7998		-0.119162	-0.00652789	-0.103171
55.9004		-0.110639	-0.0275322	-0.107043
56		-0.102819	-0.0477341	-0.111158
56.0996		-0.0960227	-0.0668632	-0.115225
56.2002		-0.0904795	-0.0846488	-0.119003
56.2998		-0.0863687	-0.100895	-0.122202
56.4004		-0.0837831	-0.115442	-0.124577
56.5		-0.0827595	-0.128161	-0.125885
56.5996		-0.0832306	-0.138953	-0.125948
56.7002		-0.0850564	-0.147782	-0.124562
56.7998		-0.088036	-0.154651	-0.121586
56.9004		-0.0919341	-0.159606	-0.116922
57		-0.0964361	-0.162746	-0.110529
57.0996		-0.101216	-0.164154	-0.102395
57.2002		-0.105937	-0.163964	-0.0925955
57.2998		-0.110255	-0.162356	-0.0813087
57.4004		-0.113823	-0.159517	-0.0687093
57.5		-0.116362	-0.155625	-0.0550279
57.5996		-0.11761	-0.150875	-0.0405346
57.7002		-0.117371	-0.145478	-0.0255335
57.7998		-0.115484	-0.139688	-0.0103494
57.9004		-0.111902	-0.133714	0.00468562
58		-0.106632	-0.127807	0.0192545
58.0996		-0.09977	-0.1222	0.0330108
58.2002		-0.0914474	-0.11711	0.0456867
58.2998		-0.081903	-0.112755	0.0570168
58.4004		-0.0713889	-0.109291	0.0668227
58.5		-0.0602258	-0.106901	0.0749341
58.5996		-0.0487541	-0.105728	0.0812702
58.7002		-0.0373632	-0.10591	0.0858271
58.7998		-0.0264652	-0.107525	0.0886069
58.9004		-0.0164387	-0.1106	0.0896955
59		-0.00765744	-0.11514	0.0892331
59.0996		-0.00042225	-0.121055	0.0874077
59.2002		0.00498631	-0.128269	0.0844125
59.2998		0.00839157	-0.136624	0.0804965
59.4004		0.00962999	-0.145949	0.075957
59.5		0.00862674	-0.156008	0.0710699
59.5996		0.00533614	-0.166529	0.0661286
59.7002		-0.000168867	-0.17723	0.0614023
59.7998		-0.00774614	-0.187834	0.0571393
59.9004		-0.0171893	-0.198093	0.0535828
60		-0.0282318	-0.207711	0.0509341
60.0996		-0.040604	-0.216428	0.0493975
60.2002		-0.0539491	-0.223963	0.0490952
60.2998		-0.0679088	-0.230129	0.0501277
60.4004		-0.0820678	-0.23476	0.0525645
60.5		-0.0960798	-0.237735	0.0564042
60.5996		-0.109558	-0.238959	0.0616481
60.7002		-0.122184	-0.238339	0.0682335
60.7998		-0.133633	-0.235862	0.0760968
60.9004		-0.143623	-0.23152	0.0851213
61		-0.151932	-0.225387	0.0951422
61.0996		-0.158364	-0.217542	0.106013
61.2002		-0.162815	-0.208119	0.117541
61.2998		-0.165202	-0.197261	0.129549
61.4004		-0.165544	-0.185122	0.141821
61.5		-0.163872	-0.171899	0.154153
61.5996		-0.160292	-0.157787	0.166358
61.7002		-0.154936	-0.142993	0.178252
61.7998		-0.147966	-0.127697	0.189713
61.9004		-0.139601	-0.112136	0.200576
62		-0.13003	-0.0965225	0.210686
62.0996		-0.119472	-0.0811043	0.219906
62.2002		-0.108145	-0.0661007	0.228161
62.2998		-0.0963242	-0.0517345	0.235414
62.4004		-0.0842606	-0.0381715	0.241634
62.5		-0.0722014	-0.0255988	0.246818
62.5996		-0.0603629	-0.0141644	0.250969
62.7002		-0.048919	-0.00399636	0.254096
62.7998		-0.0380387	0.00478331	0.256216
62.9004		-0.0278116	0.0121024	0.257356
63		-0.0183572	0.0179382	0.257565
63.0996		-0.00971536	0.0223066	0.25688
63.2002		-0.0019204	0.0252148	0.255319
63.2998		0.00503368	0.0267228	0.252889
63.4004		0.0111871	0.0269155	0.249588
63.5		0.0166293	0.0259335	0.245418
63.5996		0.0214713	0.0239129	0.240358
63.7002		0.0258257	0.0210456	0.234404
63.7998		0.029823	0.0175218	0.227517
63.9004		0.033619	0.0135481	0.219688
64		0.0373237	0.00935224	0.210894
64.0996		0.0410499	0.00516596	0.201104
64.2002		0.0448706	0.00121138	0.190309
64.2998		0.0488642	-0.00229133	0.178523
64.4004		0.0530241	-0.00516808	0.165807
64.5		0.057379	-0.00729789	0.152247
64.5996		0.0618856	-0.00857087	0.137962
64.7002		0.0665212	-0.0089344	0.123022
64.7998		0.0711835	-0.00834147	0.107592
64.9004		0.0757958	-0.00684873	0.0918049
65		0.0802386	-0.00448844	0.0758712
65.0996		0.0844702	-0.00135532	0.0599721
65.2002		0.0884159	0.00245564	0.0443593
65.2998		0.0920734	0.00679643	0.0292792
65.4004		0.0954247	0.0115071	0.0149429
65.5		0.09856	0.0164297	0.00156819
65.5996		0.101542	0.0214429	-0.0106547
65.7002		0.104515	0.0264343	-0.0215147
65.7998		0.107585	0.0313299	-0.0308465
65.9004		0.110948	0.0360701	-0.0384837
66		0.114768	0.0406617	-0.0443307
66.0996		0.119251	0.0451349	-0.0482764
66.2002		0.124542	0.04953	-0.0502638
66.2998		0.130789	0.0539277	-0.0502442
66.4004		0.138067	0.0583864	-0.0482295
66.5		0.146443	0.0630325	-0.0442701
66.5996		0.155896	0.0679648	-0.0384366
66.7002		0.166387	0.073255	-0.0308732
66.7998		0.177787	0.0789649	-0.0217094
66.9004		0.189914	0.0851329	-0.0111387
67		0.202528	0.0918078	0.000621694
67.0996		0.215334	0.0989499	0.0132952
67.2002		0.228016	0.106552	0.0266043
67.2998		0.240228	0.11458	0.0402021
67.4004		0.251635	0.122946	0.0537453
67.5		0.261914	0.131587	0.0669027
67.5996		0.270775	0.14044	0.0793231
67.7002		0.277933	0.149427	0.0907103
67.7998		0.283151	0.158493	0.100752
67.9004		0.286244	0.1676	0.1092
68		0.287116	0.176732	0.115838
68.0996		0.285739	0.185852	0.120534
68.2002		0.28219	0.194895	0.123205
68.2998		0.276594	0.203857	0.123856
68.4004		0.26917	0.212733	0.122508
68.5		0.260203	0.221535	0.119313
68.5996		0.249995	0.230243	0.114416
68.7002		0.238874	0.238819	0.108019
68.7998		0.227231	0.247213	0.100326
68.9004		0.215485	0.255345	0.0915845
69		0.204074	0.263157	0.0820714
69.0996		0.193382	0.270548	0.0720179
69.2002		0.183757	0.277453	0.0616379
69.2998		0.175523	0.283786	0.0510731
69.4004		0.168948	0.289482	0.0404736
69.5		0.164236	0.294497	0.0299265
69.5996		0.16152	0.298748	0.0194434
69.7002		0.160883	0.302212	0.00907652
69.7998		0.162319	0.304847	-0.00119443
69.9004		0.165795	0.30671	-0.0113762
70		0.171155	0.307833	-0.0215094
70.0996		0.178201	0.308301	-0.0316262
70.2002		0.18666	0.308163	-0.041735
70.2998		0.196226	0.307507	-0.0518683
70.4004		0.206576	0.306412	-0.061968
70.5		0.217324	0.304923	-0.0719863
70.5996		0.228068	0.303103	-0.0818267
70.7002		0.238378	0.300971	-0.091351
70.7998		0.247869	0.298588	-0.100443
70.9004		0.256127	0.295925	-0.108949
71		0.262803	0.292945	-0.116747
71.0996		0.267555	0.289546	-0.123671
71.2002		0.270106	0.285674	-0.129556
71.2998		0.270239	0.281247	-0.1343
71.4004		0.267776	0.276177	-0.137841
71.5		0.262608	0.270347	-0.140149
71.5996		0.254673	0.263663	-0.141205
71.7002		0.244033	0.256083	-0.141063
71.7998		0.230758	0.247563	-0.139837
71.9004		0.214985	0.23813	-0.137645
72		0.196898	0.227779	-0.134622
72.0996		0.176752	0.216586	-0.130933
72.2002		0.15482	0.204661	-0.126777
72.2998		0.131369	0.192188	-0.122373
72.4004		0.106715	0.179354	-0.117914
72.5		0.081151	0.16637	-0.113582
72.5996		0.0550108	0.153482	-0.10951
72.7002		0.028553	0.140951	-0.105826
72.7998		0.00207871	0.129042	-0.102631
72.9004		-0.0241652	0.117996	-0.0999893
73		-0.0499701	0.108063	-0.0979464
73.0996		-0.0751342	0.0994797	-0.0964921
73.2002		-0.0994815	0.0924629	-0.0956187
73.2998		-0.122872	0.087215	-0.0952936
73.4004		-0.145216	0.0838679	-0.0954779
73.5		-0.166464	0.0825124	-0.0960883
73.5996		-0.186543	0.0831881	-0.0970592
73.7002		-0.205409	0.0859326	-0.0983499
73.7998		-0.223006	0.0907132	-0.0999358
73.9004		-0.239348	0.0974714	-0.10179
74		-0.254439	0.106073	-0.103849
74.0996		-0.268337	0.116368	-0.106105
74.2002		-0.281042	0.128166	-0.108527
74.2998		-0.292567	0.141234	-0.111121
74.4004		-0.302914	0.15532	-0.11386
74.5		-0.312105	0.17013	-0.116744
74.5996		-0.320125	0.185382	-0.119777
74.7002		-0.326952	0.200768	-0.122933
74.7998		-0.332546	0.215943	-0.126221
74.9004		-0.336868	0.230527	-0.129634
75		-0.339884	0.244172	-0.133185
75.0996		-0.341538	0.256557	-0.136846
75.2002		-0.341821	0.267369	-0.140602
75.2998		-0.340725	0.276254	-0.1444
75.4004		-0.338272	0.282928	-0.148236
75.5		-0.334467	0.287084	-0.152094
75.5996		-0.329379	0.288498	-0.15595
75.7002		-0.323089	0.286974	-0.159746
75.7998		-0.315738	0.282365	-0.163389
75.9004		-0.307444	0.274551	-0.166786
76		-0.298393	0.26351	-0.169805
76.0996		-0.288766	0.249317	-0.172317
76.2002		-0.278802	0.232117	-0.174131
76.2998		-0.268679	0.21212	-0.175061
76.4004		-0.258614	0.189617	-0.174845
76.5		-0.248756	0.165	-0.173257
76.5996		-0.239275	0.138731	-0.170001
76.7002		-0.230266	0.111323	-0.164819
76.7998		-0.221843	0.0833107	-0.157448
76.9004		-0.214038	0.0552835	-0.147706
77		-0.206892	0.027842	-0.135469
77.0996		-0.200352	0.00158241	-0.120675
77.2002		-0.194388	-0.0229559	-0.103306
77.2998		-0.188969	-0.0452937	-0.0834109
77.4004		-0.184076	-0.0650256	-0.0611563
77.5		-0.179673	-0.0817984	-0.0367983
77.5996		-0.175727	-0.0953541	-0.0106865
77.7002		-0.172204	-0.105561	0.0167097
77.7998		-0.169084	-0.112426	0.0448746
77.9004		-0.166379	-0.116064	0.0732639
78		-0.164111	-0.116673	0.101286
78.0996		-0.162315	-0.114555	0.128337
78.2002		-0.161015	-0.110059	0.153786
78.2998		-0.160232	-0.103644	0.177103
78.4004		-0.159997	-0.09581	0.197755
78.5		-0.160324	-0.0870945	0.215336
78.5996		-0.16121	-0.078013	0.229511
78.7002		-0.162659	-0.069055	0.240046
78.7998		-0.164666	-0.0607159	0.246842
78.9004		-0.16724	-0.0534096	0.249909
79		-0.170372	-0.0474992	0.249391
79.0996		-0.174042	-0.0432429	0.245492
79.2002		-0.178216	-0.0408874	0.238542
79.2998		-0.182876	-0.0405712	0.228968
79.4004		-0.188029	-0.0423471	0.217275
79.5		-0.193659	-0.0462023	0.20399
79.5996		-0.19974	-0.052037	0.189642
79.7002		-0.206247	-0.0597276	0.174796
79.7998		-0.213146	-0.069025	0.159978
79.9004		-0.220357	-0.0797191	0.145648
80		-0.227778	-0.0915057	0.132227
80.0996		-0.235276	-0.104115	0.120051
80.2002		-0.242709	-0.117232	0.109426
80.2998		-0.24988	-0.130531	0.100546
80.4004		-0.25655	-0.143687	0.0935347
80.5		-0.262477	-0.156393	0.0884148
80.5996		-0.267401	-0.168385	0.0851219
80.7002		-0.271048	-0.179371	0.0835903
80.7998		-0.273111	-0.189149	0.0836687
80.9004		-0.273337	-0.197478	0.0852012
81		-0.271462	-0.204197	0.087972
81.0996		-0.267314	-0.209166	0.0917401
81.2002		-0.260712	-0.21231	0.096281
81.2998		-0.251536	-0.213603	0.101363
81.4004		-0.239716	-0.213019	0.106786
81.5		-0.225247	-0.210597	0.112334
81.5996		-0.208205	-0.206413	0.117857
81.7002		-0.188719	-0.200618	0.123246
81.7998		-0.167006	-0.193358	0.128402
81.9004		-0.143278	-0.184831	0.133265
82		-0.117823	-0.175209	0.137766
82.0996		-0.0909699	-0.164729	0.141891
82.2002		-0.0631081	-0.153632	0.145638
82.2998		-0.0346451	-0.142156	0.149069
82.4004		-0.00599556	-0.130518	0.152263
82.5		0.022389	-0.118902	0.155306
82.5996		0.0500779	-0.107525	0.158294
82.7002		0.0766282	-0.0965432	0.161316
82.7998		0.101646	-0.0861063	0.164492
82.9004		0.12477	-0.0762697	0.167939
83		0.145694	-0.0671162	0.171791
83.0996		0.164197	-0.0586639	0.176157
83.2002		0.180111	-0.0509301	0.181099
83.2998		0.193336	-0.0438411	0.186667
83.4004		0.203814	-0.0373578	0.192911
83.5		0.211517	-0.031388	0.199877
83.5996		0.216539	-0.025886	0.207594
83.7002		0.219003	-0.0207741	0.216045
83.7998		0.21911	-0.0159951	0.225206
83.9004		0.217057	-0.0114769	0.23502
84		0.213114	-0.00720375	0.24542
84.0996		0.207511	-0.00318098	0.256295
84.2002		0.20049	0.000603287	0.267541
84.2998		0.19231	0.00413193	0.279024
84.4004		0.183236	0.00738828	0.290593
84.5		0.173526	0.0103087	0.302062
84.5996		0.163408	0.0128857	0.313205
84.7002		0.153089	0.0151074	0.323799
84.7998		0.142738	0.0170208	0.333592
84.9004		0.132532	0.0186387	0.342369
85		0.12262	0.0200363	0.349886
85.0996		0.113115	0.0213049	0.355937
85.2002		0.104118	0.0226158	0.360269
85.2998		0.0957526	0.024159	0.362678
85.4004		0.0880949	0.0261552	0.36301
85.5		0.081166	0.0287921	0.36115
85.5996		0.0749442	0.0322876	0.357061
85.7002		0.0694169	0.0368199	0.350714
85.7998		0.0645569	0.0425864	0.342179
85.9004		0.0603474	0.0497153	0.331557
86		0.0567429	0.058273	0.31906
86.0996		0.053701	0.068273	0.304898
86.2002		0.0511423	0.0796582	0.289366
86.2998		0.0490209	0.092318	0.272743
86.4004		0.0472719	0.106041	0.255355
86.5		0.045913	0.120598	0.23753
86.5996		0.0449349	0.13568	0.219602
86.7002		0.0443877	0.150976	0.201912
86.7998		0.0442832	0.166159	0.184758
86.9004		0.0446878	0.180858	0.168394
87		0.0456272	0.194735	0.153006
87.0996		0.0471662	0.207445	0.138815
87.2002		0.0493464	0.218697	0.125945
87.2998		0.0522468	0.228243	0.114477
87.4004		0.0559161	0.23587	0.104417
87.5		0.0603721	0.241472	0.0957688
87.5996		0.0656007	0.244952	0.088453
87.7002		0.0715946	0.246274	0.0823464
87.7998		0.0783282	0.245464	0.0772901
87.9004		0.0857133	0.242641	0.0730644
88		0.0936481	0.237974	0.0694521
88.0996		0.102013	0.231699	0.0662008
88.2002		0.110725	0.224105	0.063029
88.2998		0.119636	0.215522	0.0596474
88.4004		0.128607	0.20633	0.0557897
88.5		0.137501	0.196968	0.0512004
88.5996		0.146215	0.187843	0.0456823
88.7002		0.154617	0.179346	0.0390321
88.7998		0.162591	0.171904	0.0311106
88.9004		0.170051	0.1659	0.0218253
89		0.176912	0.161699	0.0111919
89.0996		0.183109	0.159558	-0.000699604
89.2002		0.188558	0.159668	-0.0137311
89.2998		0.193195	0.162128	-0.027681
89.4004		0.196962	0.166934	-0.0423127
89.5		0.199815	0.174022	-0.0572969
89.5996		0.201695	0.183217	-0.0723077
89.7002		0.202581	0.194273	-0.0870018
89.7998		0.20244	0.206828	-0.101014
89.9004		0.201236	0.220525	-0.114017
90		0.198934	0.234938	-0.125667
90.0996		0.195508	0.249674	-0.135692
90.2002		0.19094	0.264316	-0.143879
90.2998		0.185213	0.27848	-0.150079
90.4004		0.178339	0.291823	-0.154243
90.5		0.170343	0.30402	-0.156348
90.5996		0.161252	0.314898	-0.156476
90.7002		0.151097	0.324289	-0.154756
90.7998		0.139953	0.332124	-0.151397
90.9004		0.127878	0.338356	-0.146686
91		0.114954	0.343048	-0.140918
91.0996		0.101249	0.346285	-0.134426
91.2002		0.0868957	0.348205	-0.127519
91.2998		0.0720006	0.348968	-0.120553
91.4004		0.056688	0.34876	-0.113862
91.5		0.0411124	0.34777	-0.107741
91.5996		0.0253987	0.346177	-0.102474
91.7002		0.00970621	0.344162	-0.0982662
91.7998		-0.00584677	0.341878	-0.0952864
91.9004		-0.0211082	0.339491	-0.0936564
92		-0.0359702	0.337122	-0.0934348
92.0996		-0.0502666	0.33488	-0.0946255
92.2002		-0.0638488	0.332838	-0.0971816
92.2998		-0.0765914	0.331043	-0.101051
92.4004		-0.0883663	0.329535	-0.106143
92.5		-0.0990934	0.328336	-0.112333
92.5996		-0.108635	0.32746	-0.119459
92.7002		-0.116922	0.326896	-0.127369
92.7998		-0.123853	0.326633	-0.135903
92.9004		-0.129388	0.326627	-0.14493
93		-0.133461	0.326786	-0.154351
93.0996		-0.13604	0.327008	-0.164059
93.2002		-0.137162	0.327143	-0.173963
93.2998		-0.136899	0.327079	-0.183972
93.4004		-0.13532	0.326673	-0.194017
93.5		-0.132498	0.32581	-0.20403
93.5996		-0.128529	0.324343	-0.213961
93.7002		-0.123601	0.322147	-0.223743
93.7998		-0.117873	0.319024	-0.233295
93.9004		-0.111567	0.314819	-0.242492
94		-0.104898	0.309406	-0.251197
94.0996		-0.0981422	0.302689	-0.259257
94.2002		-0.0914796	0.294568	-0.266489
94.2998		-0.0851179	0.284982	-0.272692
94.4004		-0.079253	0.273914	-0.277658
94.5		-0.0741016	0.261326	-0.281174
94.5996		-0.0698293	0.247207	-0.28305
94.7002		-0.0665658	0.231553	-0.283093
94.7998		-0.0644041	0.214413	-0.281138
94.9004		-0.0633892	0.195853	-0.277045
95		-0.0635379	0.175953	-0.270728
95.0996		-0.0648409	0.154806	-0.262168
95.2002		-0.0672729	0.132526	-0.251386
95.2998		-0.07075	0.109194	-0.238456
95.4004		-0.0751624	0.0849487	-0.223518
95.5		-0.0803531	0.0598911	-0.206785
95.5996		-0.0861759	0.034194	-0.188497
95.7002		-0.0924875	0.00803263	-0.168979
95.7998		-0.0991696	-0.0184047	-0.148562
95.9004		-0.106071	-0.0449212	-0.127625
96		-0.113071	-0.0713137	-0.106544
96.0996		-0.120033	-0.0973531	-0.0857165
96.2002		-0.126895	-0.122834	-0.0655083
96.2998		-0.133597	-0.147494	-0.0462817
96.4004		-0.140165	-0.17111	-0.0283673
96.5		-0.146602	-0.193435	-0.0120714
96.5996		-0.152992	-0.214235	0.0023878
96.7002		-0.159375	-0.233273	0.0148515
96.7998		-0.165877	-0.250361	0.0251904
96.9004		-0.172619	-0.265379	0.0333488
97		-0.179791	-0.278219	0.0393242
97.0996		-0.187547	-0.288802	0.0431938
97.2002		-0.196073	-0.297098	0.045107
97.2998		-0.205488	-0.303119	0.0452669
97.4004		-0.215904	-0.306957	0.0439253
97.5		-0.227382	-0.308744	0.041347
97.5996		-0.239941	-0.308647	0.0377973
97.7002		-0.253541	-0.306812	0.0335597
97.7998		-0.268072	-0.303421	0.0288877
97.9004		-0.283375	-0.298734	0.0240333
98		-0.299215	-0.292944	0.0191581
98.0996		-0.315275	-0.286264	0.0144073
98.2002		-0.331194	-0.278863	0.00984651
98.2998		-0.346578	-0.270909	0.0054971
98.4004		-0.360997	-0.262531	0.00132939
98.5		-0.374012	-0.253812	-0.00272811
98.5996		-0.385189	-0.24487	-0.00678925
98.7002		-0.394153	-0.235758	-0.010998
98.7998		-0.400584	-0.226536	-0.0154865
98.9004		-0.404245	-0.217215	-0.0203751
99		-0.404969	-0.207822	-0.0257621
99.0996		-0.402732	-0.1984	-0.0317247
99.2002		-0.397602	-0.188963	-0.0382602
99.2998		-0.38974	-0.179582	-0.0453097
99.4004		-0.379393	-0.170296	-0.0527494
99.5		-0.366923	-0.161247	-0.0604019
99.5996		-0.35273	-0.152572	-0.0680104
99.7002		-0.337274	-0.144435	-0.0752721
99.7998		-0.321012	-0.13698	-0.0818855
99.9004		-0.304395	-0.13036	-0.0874898
100		-0.287867	-0.124733	-0.0917227
100.1		-0.271813	-0.120252	-0.0942636
100.2		-0.256587	-0.117062	-0.0948285
100.3		-0.242436	-0.115228	-0.0931893
100.4		-0.22957	-0.114821	-0.0891802
100.5		-0.21808	-0.11582	-0.0826542
100.6		-0.207987	-0.118161	-0.0735784
100.7		-0.199237	-0.121729	-0.061973
100.8		-0.191735	-0.126349	-0.0479813
100.9		-0.185358	-0.131786	-0.0318043
101		-0.17992	-0.137736	-0.0136656
101.1		-0.175238	-0.143897	0.00610289
101.2		-0.171065	-0.149926	0.0271643
101.3		-0.167203	-0.155524	0.0491056
101.4		-0.163463	-0.160388	0.0715172
101.5		-0.159691	-0.164265	0.0939867
101.6		-0.15574	-0.16692	0.116092
101.7		-0.151463	-0.168159	0.137468
101.8		-0.146786	-0.167848	0.157731
101.9		-0.141618	-0.165899	0.176576
102		-0.135917	-0.162348	0.19373
102.1		-0.129654	-0.157292	0.208988
102.2		-0.122875	-0.150902	0.2222
102.3		-0.115604	-0.143372	0.233279
102.4		-0.107832	-0.134951	0.242237
102.5		-0.0995726	-0.125894	0.249128
102.6		-0.0908211	-0.116479	0.254097
102.7		-0.0815978	-0.106966	0.257286
102.8		-0.0718939	-0.0976052	0.258909
102.9		-0.0617225	-0.0886271	0.259228
103		-0.0510649	-0.0802183	0.258503
103.1		-0.0398867	-0.0725334	0.257013
103.2		-0.0281425	-0.0656584	0.25502
103.3		-0.0157597	-0.0596128	0.252807
103.4		-0.00266047	-0.0543553	0.250588
103.5		0.011208	-0.0498156	0.24852
103.6		0.0259117	-0.045872	0.246732
103.7		0.0414852	-0.0423902	0.245312
103.8		0.0579953	-0.0391917	0.244293
103.9		0.0754511	-0.0360713	0.24366
104		0.0938605	-0.0328304	0.243353
104.1		0.113162	-0.029281	0.243249
104.2		0.133329	-0.0252371	0.243201
104.3		0.15427	-0.0205761	0.243041
104.4		0.175893	-0.015222	0.242601
104.5		0.198061	-0.00914238	0.241746
104.6		0.220626	-0.002353	0.24029
104.7		0.243413	0.0050748	0.238126
104.8		0.266223	0.0130199	0.235174
104.9		0.288835	0.0213553	0.231385
105		0.311038	0.0298697	0.226747
105.1		0.332636	0.0383513	0.221297
105.2		0.353401	0.0465331	0.215097
105.3		0.373093	0.0541922	0.208236
105.4		0.391478	0.0610928	0.20086
105.5		0.408353	0.0670546	0.193106
105.6		0.423526	0.0718967	0.185148
105.7		0.436825	0.0755012	0.177102
105.8		0.448103	0.0778162	0.16913
105.9		0.457243	0.0788967	0.161325
106		0.464175	0.0788081	0.153817
106.1		0.468848	0.0776956	0.146646
106.2		0.47126	0.0757629	0.139825
106.3		0.471442	0.0732403	0.13335
106.4		0.469464	0.0704356	0.12718
106.5		0.46544	0.0676552	0.12124
106.6		0.459482	0.0652412	0.115408
106.7		0.45174	0.0635083	0.109576
106.8		0.442345	0.0627732	0.10359
106.9		0.431441	0.063314	0.0973261
107		0.419105	0.0653615	0.0906256
107.1		0.405449	0.0691478	0.0834006
107.2		0.390529	0.0747994	0.0755464
107.3		0.374409	0.0824067	0.0670184
107.4		0.3571	0.0919947	0.0577651
107.5		0.338626	0.103528	0.047744
107.6		0.318978	0.116912	0.0369549
107.7		0.298189	0.131963	0.0253995
107.8		0.276279	0.14844	0.0131589
107.9		0.253325	0.166081	0.000283459
108		0.229428	0.184603	-0.0131484
108.1		0.204742	0.20372	-0.0270313
108.2		0.17948	0.223123	-0.0412137
108.3		0.153922	0.242501	-0.0555771
108.4		0.128419	0.261586	-0.0699867
108.5		0.103343	0.280088	-0.0843563
108.6		0.079092	0.297771	-0.0985704
108.7		0.0560858	0.314448	-0.112546
108.8		0.0347936	0.329994	-0.126162
108.9		0.0156667	0.344353	-0.139312
109		-0.000889317	0.357492	-0.151931
109.1		-0.0145342	0.369461	-0.163924
109.2		-0.0250048	0.380267	-0.175216
109.3		-0.0321021	0.39	-0.185697
109.4		-0.0357032	0.398758	-0.195297
109.5		-0.0357793	0.40666	-0.203944
109.6		-0.0324054	0.413775	-0.211555
109.7		-0.0257652	0.420146	-0.218064
109.8		-0.0161338	0.425847	-0.223362
109.9		-0.00385437	0.430867	-0.227403
110		0.0106641	0.435218	-0.230119
110.1		0.027003	0.438831	-0.231449
110.2		0.0446631	0.44166	-0.231388
110.3		0.0631453	0.443591	-0.229933
110.4		0.0819085	0.44452	-0.227139
110.5		0.100486	0.444331	-0.223073
110.6		0.118405	0.442915	-0.217846
110.7		0.13525	0.440194	-0.211611
110.8		0.150633	0.436092	-0.204546
110.9		0.164224	0.430611	-0.196913
111		0.17575	0.423734	-0.188934
111.1		0.184961	0.415497	-0.18087
111.2		0.191704	0.405957	-0.172981
111.3		0.195822	0.39522	-0.165533
111.4		0.197256	0.383383	-0.158767
111.5		0.195994	0.370589	-0.152869
111.6		0.192123	0.357017	-0.148005
111.7		0.185745	0.342853	-0.144308
111.8		0.176989	0.328269	-0.141865
111.9		0.166053	0.313391	-0.140734
112		0.153162	0.298394	-0.140926
112.1		0.138597	0.283433	-0.142407
112.2		0.122642	0.268661	-0.145102
112.3		0.10567	0.254198	-0.148907
112.4		0.0880257	0.240177	-0.153717
112.5		0.0700675	0.2267	-0.159415
112.6		0.0521365	0.213842	-0.16589
112.7		0.0345584	0.201694	-0.173011
112.8		0.0176455	0.190309	-0.180672
112.9		0.00165644	0.17976	-0.188784
113		-0.0131566	0.170103	-0.197283
113.1		-0.02666	0.161397	-0.206098
113.2		-0.0387119	0.153712	-0.215146
113.3		-0.0492752	0.147077	-0.224369
113.4		-0.0583486	0.141543	-0.233704
113.5		-0.0659992	0.137133	-0.243097
113.6		-0.0723422	0.133907	-0.252454
113.7		-0.0775227	0.13185	-0.261647
113.8		-0.0817284	0.130974	-0.270573
113.9		-0.0851412	0.131219	-0.279106
114		-0.0879722	0.132532	-0.287139
114.1		-0.0904545	0.134816	-0.294487
114.2		-0.0928037	0.13798	-0.300985
114.3		-0.0952221	0.141881	-0.306472
114.4		-0.0978579	0.146296	-0.310819
114.5		-0.100881	0.150995	-0.313852
114.6		-0.104396	0.155748	-0.315411
114.7		-0.1085	0.160325	-0.315373
114.8		-0.113205	0.164424	-0.313662
114.9		-0.118552	0.167724	-0.310237
115		-0.12452	0.169921	-0.305077
115.1		-0.131085	0.170741	-0.298227
115.2		-0.138176	0.169923	-0.289752
115.3		-0.145744	0.167248	-0.279804
115.4		-0.153726	0.162492	-0.268521
115.5		-0.162088	0.155547	-0.256095
115.6		-0.170754	0.146296	-0.242742
115.7		-0.179669	0.134713	-0.228725
115.8		-0.188735	0.12078	-0.214319
115.9		-0.197921	0.104531	-0.199814
116		-0.207129	0.0860407	-0.185511
116.1		-0.216309	0.0654501	-0.171674
116.2		-0.22538	0.042964	-0.158594
116.3		-0.234298	0.0188105	-0.146491
116.4		-0.242993	-0.00672001	-0.135573
116.5		-0.251415	-0.0333286	-0.125957
116.6		-0.259472	-0.0606882	-0.117741
116.7		-0.267072	-0.0884738	-0.110913
116.8		-0.274117	-0.116335	-0.105426
116.9		-0.280536	-0.143903	-0.101171
117		-0.286261	-0.17084	-0.0980112
117.1		-0.291206	-0.196803	-0.0957586
117.2		-0.29527	-0.221441	-0.0942042
117.3		-0.298421	-0.244424	-0.0931022
117.4		-0.30066	-0.265475	-0.092168
117.5		-0.301994	-0.284354	-0.0911077
117.6		-0.302433	-0.300801	-0.0896334
117.7		-0.302003	-0.314644	-0.0874868
117.8		-0.300756	-0.325745	-0.0844406
117.9		-0.298751	-0.33398	-0.0802924
118		-0.296072	-0.339294	-0.0748713
118.1		-0.29279	-0.341652	-0.0680547
118.2		-0.288983	-0.341101	-0.0597284
118.3		-0.284707	-0.337664	-0.0498577
118.4		-0.280021	-0.331427	-0.0384007
118.5		-0.275001	-0.32252	-0.025411
118.6		-0.269697	-0.311126	-0.010931
118.7		-0.264149	-0.297493	0.00493701
118.8		-0.258416	-0.281842	0.0220615
118.9		-0.252544	-0.264476	0.0402971
119		-0.246582	-0.245676	0.0594625
119.1		-0.240598	-0.225787	0.0793767
119.2		-0.234699	-0.205183	0.0998152
119.3		-0.22902	-0.184229	0.120542
119.4		-0.223716	-0.163313	0.141319
119.5		-0.218981	-0.142817	0.161917
119.6		-0.215017	-0.123156	0.18212
119.7		-0.212049	-0.104683	0.201695
119.8		-0.210271	-0.0877326	0.220436
119.9		-0.209909	-0.0725814	0.238142
120		-0.211139	-0.0595011	0.254667
120.1		-0.214123	-0.0487225	0.269896
120.2		-0.218978	-0.0404026	0.283703
120.3		-0.225773	-0.0346642	0.296022
120.4		-0.234486	-0.0315321	0.306795
120.5		-0.245005	-0.0310239	0.316022
120.6		-0.25717	-0.0330881	0.323752
120.7		-0.270711	-0.0376561	0.330025
120.8		-0.285307	-0.0445899	0.334951
120.9		-0.300545	-0.0536971	0.338639
121		-0.316006	-0.0647733	0.341208
121.1		-0.331234	-0.0775928	0.342761
121.2		-0.345776	-0.0919291	0.34342
121.3		-0.359198	-0.107515	0.34334
121.4		-0.371073	-0.124107	0.342622
121.5		-0.381058	-0.141432	0.341388
121.6		-0.388836	-0.159234	0.339712
121.7		-0.39422	-0.177249	0.337662
121.8		-0.397099	-0.19522	0.335305
121.9		-0.397436	-0.212913	0.33264
122		-0.395288	-0.230079	0.329676
122.1		-0.390775	-0.246491	0.326379
122.2		-0.384142	-0.261941	0.322752
122.3		-0.37565	-0.276246	0.318785
122.4		-0.365635	-0.2892	0.314454
122.5		-0.354384	-0.300642	0.309731
122.6		-0.342217	-0.310442	0.304606
122.7		-0.329435	-0.318501	0.299115
122.8		-0.316316	-0.324711	0.293325
122.9		-0.30306	-0.328985	0.287343
123		-0.2898	-0.331293	0.281303
123.1		-0.276646	-0.331623	0.275311
123.2		-0.263641	-0.329978	0.269515
123.3		-0.250752	-0.326365	0.264102
123.4		-0.237945	-0.320827	0.259266
123.5		-0.225135	-0.313425	0.25515
123.6		-0.212269	-0.304219	0.251853
123.7		-0.199271	-0.293283	0.249452
123.8		-0.18611	-0.280684	0.248008
123.9		-0.172746	-0.266499	0.247531
124		-0.159194	-0.250788	0.247938
124.1		-0.14549	-0.233629	0.249105
124.2		-0.131713	-0.215109	0.250868
124.3		-0.118002	-0.195324	0.253049
124.4		-0.104503	-0.174351	0.255402
124.5		-0.0913615	-0.15227	0.257669
124.6		-0.0787218	-0.129174	0.259605
124.7		-0.0667277	-0.105203	0.260984
124.8		-0.0554635	-0.0804817	0.261658
124.9		-0.0449608	-0.0551813	0.261497
125		-0.0351776	-0.0294445	0.260444
125.1		-0.0260491	-0.00349024	0.258479
125.2		-0.0174261	0.0225122	0.2557
125.3		-0.00910378	0.0483384	0.252209
125.4		-0.000831074	0.0737889	0.248158
125.5		0.0076682	0.0986294	0.243704
125.6		0.0167118	0.122646	0.239046
125.7		0.0266031	0.145625	0.234405
125.8		0.0376627	0.167367	0.22997
125.9		0.0501393	0.187699	0.225934
126		0.0642808	0.206499	0.222401
126.1		0.0801825	0.223665	0.219444
126.2		0.0979138	0.239123	0.217029
126.3		0.117416	0.252835	0.215125
126.4		0.138597	0.264802	0.2136
126.5		0.161225	0.275101	0.212291
126.6		0.185023	0.283816	0.210979
126.7		0.209601	0.291066	0.209448
126.8		0.234571	0.296981	0.207461
126.9		0.259464	0.301731	0.204758
127		0.28384	0.305509	0.201097
127.1		0.307248	0.308513	0.196229
127.2		0.329241	0.310938	0.190007
127.3		0.349401	0.312941	0.182293
127.4		0.367398	0.314692	0.173026
127.5		0.382955	0.316377	0.162164
127.6		0.395853	0.318139	0.149732
127.7		0.40597	0.320068	0.135842
127.8		0.41325	0.322218	0.120646
127.9		0.417728	0.324585	0.104337
128		0.419471	0.327154	0.0871385
128.1		0.418637	0.329877	0.069347
128.2		0.4154	0.332663	0.0512546
128.3		0.409988	0.335409	0.0331815
128.4		0.402619	0.33794	0.0154385
128.5		0.393522	0.340125	-0.00165457
128.6		0.382917	0.34178	-0.0178438
128.7		0.37102	0.342757	-0.0328697
128.8		0.358005	0.342927	-0.0465612
128.9		0.344044	0.342153	-0.0587536
129		0.329258	0.340339	-0.0693458
129.1		0.313751	0.3374	-0.0783003
129.2		0.297588	0.333358	-0.0856396
129.3		0.280827	0.328207	-0.091444
129.4		0.263491	0.321977	-0.0957891
129.5		0.245605	0.314727	-0.0988226
129.6		0.227181	0.306559	-0.100714
129.7		0.208221	0.297614	-0.10164
129.8		0.188769	0.288022	-0.101788
129.9		0.168844	0.277975	-0.10129
130		0.148512	0.267614	-0.100324
130.1		0.127825	0.257102	-0.0990291
130.2		0.106907	0.246581	-0.0975616
130.3		0.0858458	0.236219	-0.0960369
130.4		0.0647653	0.226185	-0.0944902
130.5		0.0438047	0.216629	-0.0929885
130.6		0.0230982	0.207718	-0.0915658
130.7		0.00282075	0.199573	-0.0902668
130.8		-0.0168831	0.192345	-0.0891242
130.9		-0.0358477	0.186163	-0.0881526
131		-0.0539555	0.181161	-0.087391
131.1		-0.0710412	0.177424	-0.0868113
131.2		-0.0869945	0.175	-0.0864422
131.3		-0.101703	0.173924	-0.0862934
131.4		-0.115075	0.174215	-0.0863758
131.5		-0.127059	0.175828	-0.0866817
131.6		-0.137643	0.178664	-0.0871598
131.7		-0.146886	0.182594	-0.0877809
131.8		-0.154833	0.187433	-0.0884955
131.9		-0.161569	0.192933	-0.0892248
132		-0.167192	0.198815	-0.0898656
132.1		-0.171833	0.204751	-0.090303
132.2		-0.175631	0.210408	-0.0904221
132.3		-0.178745	0.215428	-0.0900942
132.4		-0.181358	0.219471	-0.089208
132.5		-0.18362	0.222197	-0.0876506
132.6		-0.185673	0.223335	-0.085306
132.7		-0.187608	0.222667	-0.082119
132.8		-0.189554	0.220031	-0.0780491
132.9		-0.191546	0.215324	-0.0730962
133		-0.193655	0.208488	-0.0672671
133.1		-0.19588	0.199619	-0.0606184
133.2		-0.198202	0.188831	-0.0532476
133.3		-0.200546	0.176364	-0.0452485
133.4		-0.202799	0.162487	-0.0367537
133.5		-0.204874	0.147563	-0.0279273
133.6		-0.206682	0.131941	-0.0189774
133.7		-0.208134	0.116034	-0.0100809
133.8		-0.209122	0.100208	-0.00141185
133.9		-0.209554	0.0848262	0.00686437
134		-0.209359	0.0702205	0.0145827
134.1		-0.208409	0.0566664	0.0215995
134.2		-0.206671	0.0443734	0.0278156
134.3		-0.204093	0.0334614	0.0331236
134.4		-0.200682	0.0240126	0.0374584
134.5		-0.1964	0.0159878	0.0407488
134.6		-0.191296	0.00934636	0.0429829
134.7		-0.185384	0.00395994	0.0441381
134.8		-0.178741	-0.000313373	0.0442436
134.9		-0.171476	-0.00368015	0.0433482
135		-0.163752	-0.0063632	0.0415292
135.1		-0.155731	-0.00858067	0.0388825
135.2		-0.147617	-0.010514	0.035505
135.3		-0.139621	-0.0123331	0.03153
135.4		-0.132029	-0.0141752	0.0270707
135.5		-0.125111	-0.0161661	0.0222711
135.6		-0.119166	-0.0183786	0.0172649
135.7		-0.114474	-0.0208245	0.0122327
135.8		-0.111311	-0.0234663	0.0073238
135.9		-0.10994	-0.02622	0.00271965
136		-0.110586	-0.0290185	-0.00146008
136.1		-0.113454	-0.0317617	-0.00511812
136.2		-0.118668	-0.0343783	-0.00815416
136.3		-0.126288	-0.0367462	-0.0104752
136.4		-0.136296	-0.0387616	-0.0119891
136.5		-0.148612	-0.0403726	-0.0126723
136.6		-0.163078	-0.0415318	-0.0124924
136.7		-0.179517	-0.0422388	-0.0114708
136.8		-0.197657	-0.0425029	-0.00960923
136.9		-0.217213	-0.0423637	-0.00697838
137		-0.2378	-0.0418605	-0.00363102
137.1		-0.259043	-0.0410909	0.000341013
137.2		-0.280543	-0.0401818	0.00486815
137.3		-0.301929	-0.0391971	0.00983556
137.4		-0.32282	-0.0382415	0.0151431
137.5		-0.34291	-0.0373948	0.0206746
137.6		-0.361861	-0.0367515	0.0263595
137.7		-0.379392	-0.0364032	0.0321288
137.8		-0.395248	-0.036389	0.0379625
137.9		-0.409247	-0.0367827	0.0438408
138		-0.421223	-0.0375745	0.0498076
138.1		-0.431062	-0.0387333	0.0559013
138.2		-0.438694	-0.0401947	0.0622078
138.3		-0.444071	-0.0418775	0.0688341
138.4		-0.44715	-0.0437339	0.0758784
138.5		-0.447955	-0.0456671	0.0834793
138.6		-0.446549	-0.0476125	0.0917664
138.7		-0.443031	-0.0494609	0.100907
138.8		-0.437521	-0.0511286	0.111001
138.9		-0.430155	-0.0525563	0.12211
139		-0.421105	-0.0537219	0.13426
139.1		-0.410582	-0.0546604	0.147429
139.2		-0.398801	-0.0553921	0.161563
139.3		-0.386014	-0.0560121	0.176555
139.4		-0.372515	-0.0566188	0.192248
139.5		-0.358602	-0.0573444	0.208418
139.6		-0.344551	-0.0583461	0.224837
139.7		-0.330608	-0.0597753	0.241263
139.8		-0.317011	-0.0617959	0.257406
139.9		-0.304001	-0.0645476	0.273011
140		-0.291775	-0.0681676	0.287805
140.1		-0.280494	-0.0727242	0.301569
140.2		-0.27023	-0.0782931	0.31411
140.3		-0.260986	-0.0848936	0.325246
140.4		-0.252697	-0.0924869	0.334899
140.5		-0.245285	-0.100972	0.342989
140.6		-0.238616	-0.110215	0.349488
140.7		-0.232493	-0.120048	0.354407
140.8		-0.226678	-0.130289	0.357731
140.9		-0.22093	-0.140723	0.359531
141		-0.215011	-0.151102	0.359852
141.1		-0.20869	-0.161215	0.358763
141.2		-0.201827	-0.170889	0.356308
141.3		-0.194283	-0.179953	0.352518
141.4		-0.185994	-0.188238	0.347458
141.5		-0.176908	-0.19558	0.341157
141.6		-0.167037	-0.201867	0.333654
141.7		-0.156466	-0.206997	0.324977
141.8		-0.145338	-0.210893	0.315158
141.9		-0.133851	-0.213505	0.304217
142		-0.122199	-0.214817	0.29221
142.1		-0.110608	-0.21479	0.279248
142.2		-0.0992918	-0.213359	0.265443
142.3		-0.0884548	-0.210469	0.250932
142.4		-0.0782631	-0.206095	0.235882
142.5		-0.068842	-0.200227	0.220506
142.6		-0.0602867	-0.192851	0.205038
142.7		-0.0526412	-0.183958	0.189712
142.8		-0.0459149	-0.173581	0.174765
142.9		-0.0400392	-0.161785	0.160421
143		-0.0348968	-0.148652	0.14689
143.1		-0.0303702	-0.134309	0.134363
143.2		-0.0262862	-0.118922	0.122994
143.3		-0.0224896	-0.102717	0.112932
143.4		-0.0188211	-0.0859636	0.104257
143.5		-0.0151518	-0.0689383	0.0970106
143.6		-0.0113592	-0.0519572	0.0911838
143.7		-0.00731961	-0.0353632	0.0867013
143.8		-0.00296806	-0.0195135	0.0834963
143.9		0.00174382	-0.00471819	0.0814855
144		0.00680321	0.00871843	0.0805968
144.1		0.0122184	0.0205366	0.0807225
144.2		0.0179576	0.0305003	0.0818023
144.3		0.0239218	0.0384404	0.0837219
144.4		0.0300116	0.0442521	0.0863857
144.5		0.0361232	0.0479302	0.0897285
144.6		0.0421769	0.0494855	0.0937603
144.7		0.0480664	0.049002	0.0985248
144.8		0.0537291	0.0465914	0.104034
144.9		0.0590853	0.0424598	0.11032
145		0.0640909	0.036827	0.117386
145.1		0.0687368	0.0299601	0.125304
145.2		0.0730598	0.022132	0.134084
145.3		0.0770854	0.0136177	0.14377
145.4		0.0808849	0.00470984	0.154328
145.5		0.0845769	-0.0043351	0.165733
145.6		0.0882655	-0.0132482	0.177892
145.7		0.0920387	-0.0218019	0.190655
145.8		0.0959994	-0.0297581	0.203844
145.9		0.100279	-0.0368927	0.217239
146		0.104968	-0.0430181	0.230632
146.1		0.110135	-0.048011	0.243758
146.2		0.115837	-0.0517418	0.256342
146.3		0.122073	-0.0541141	0.268066
146.4		0.128841	-0.0550285	0.278635
146.5		0.136084	-0.0544242	0.287786
146.6		0.143722	-0.05228	0.295271
146.7		0.15165	-0.0486065	0.300853
146.8		0.159783	-0.0434818	0.304342
146.9		0.167963	-0.0369677	0.305656
147		0.176073	-0.029157	0.304765
147.1		0.183967	-0.0201449	0.301695
147.2		0.191519	-0.0100708	0.296505
147.3		0.198601	0.000866473	0.289343
147.4		0.205138	0.0124565	0.280415
147.5		0.211046	0.0245018	0.269981
147.6		0.216278	0.0368088	0.258294
147.7		0.220777	0.0491861	0.24565
147.8		0.224526	0.0614365	0.232362
147.9		0.227511	0.0733881	0.218716
148		0.229742	0.0848833	0.204995
148.1		0.231219	0.0957682	0.191393
148.2		0.231926	0.105962	0.17812
148.3		0.231861	0.115384	0.165317
148.4		0.231027	0.123975	0.153084
148.5		0.229428	0.131715	0.141456
148.6		0.227051	0.1386	0.130431
148.7		0.223899	0.14468	0.119946
148.8		0.219979	0.150005	0.109957
148.9		0.215341	0.154671	0.100323
149		0.210046	0.158733	0.0909085
149.1		0.204164	0.162285	0.0815882
149.2		0.197766	0.165433	0.0722431
149.3		0.190961	0.168241	0.0628069
149.4		0.183867	0.170799	0.0531742
149.5		0.176646	0.173119	0.0433006
149.6		0.169451	0.175282	0.0331313
149.7		0.162443	0.177301	0.0226454
149.8		0.155768	0.179222	0.0118864
149.9		0.149597	0.181058	0.000917291
150		0.144057	0.182788	-0.0101662
150.1		0.139245	0.184362	-0.0213435
150.2		0.135268	0.185709	-0.032567
150.3		0.132157	0.186787	-0.0437607
150.4		0.129948	0.187535	-0.0548866
150.5		0.128608	0.187942	-0.0658897
150.6		0.128152	0.187924	-0.0767683
150.7		0.128537	0.187452	-0.0875056
150.8		0.129715	0.186509	-0.098088
150.9		0.131571	0.185107	-0.10852
151		0.134007	0.183234	-0.118793
151.1		0.136932	0.18091	-0.128914
151.2		0.140218	0.178209	-0.138888
151.3		0.143742	0.175215	-0.148722
151.4		0.14735	0.172028	-0.158393
151.5		0.150926	0.168727	-0.167848
151.6		0.15432	0.165452	-0.17705
151.7		0.157381	0.162333	-0.185904
151.8		0.159948	0.159529	-0.194324
151.9		0.161855	0.157162	-0.202237
152		0.162951	0.155354	-0.209558
152.1		0.16306	0.154203	-0.216181
152.2		0.162056	0.153779	-0.222007
152.3		0.159804	0.154103	-0.226954
152.4		0.156176	0.15516	-0.230928
152.5		0.151057	0.156909	-0.233863
152.6		0.144363	0.159271	-0.235773
152.7		0.136036	0.162103	-0.236689
152.8		0.126032	0.16519	-0.236638
152.9		0.114368	0.168285	-0.235629
153		0.101045	0.171127	-0.233741
153.1		0.0861171	0.173423	-0.231063
153.2		0.0696196	0.174876	-0.227712
153.3		0.0516829	0.175161	-0.223822
153.4		0.032428	0.173986	-0.219513
153.5		0.0120146	0.171088	-0.214908
153.6		-0.00939675	0.1663	-0.210108
153.7		-0.0316	0.159517	-0.205199
153.8		-0.0543607	0.15067	-0.200282
153.9		-0.0774372	0.139799	-0.195468
154		-0.100511	0.127008	-0.190817
154.1		-0.123276	0.11254	-0.186374
154.2		-0.145403	0.0967141	-0.182143
154.3		-0.16653	0.0799435	-0.178111
154.4		-0.186336	0.0626447	-0.174255
154.5		-0.204444	0.0453218	-0.170555
154.6		-0.220508	0.0285283	-0.166973
154.7		-0.234217	0.0128123	-0.163415
154.8		-0.245347	-0.00133113	-0.159788
154.9		-0.253644	-0.0134167	-0.156018
155		-0.258962	-0.023026	-0.152024
155.1		-0.261193	-0.0298446	-0.147686
155.2		-0.26039	-0.0337127	-0.142912
155.3		-0.256651	-0.0345063	-0.137623
155.4		-0.25021	-0.0322823	-0.131749
155.5		-0.241361	-0.0272031	-0.125223
155.6		-0.230524	-0.0195691	-0.117991
155.7		-0.218152	-0.0097785	-0.110034
155.8		-0.204807	0.00170143	-0.101349
155.9		-0.191008	0.014318	-0.0919853
156		-0.177355	0.0275005	-0.081979
156.1		-0.164386	0.040619	-0.071393
156.2		-0.152655	0.0530421	-0.0603047
156.3		-0.142635	0.064142	-0.0488306
156.4		-0.134729	0.0733677	-0.0370783
156.5		-0.129181	0.0802196	-0.0251647
156.6		-0.126161	0.0842919	-0.0131818
156.7		-0.125723	0.0852897	-0.00122411
156.8		-0.127824	0.0830248	0.010594
156.9		-0.132309	0.0773945	0.0221977
157		-0.138935	0.0684075	0.0335282
157.1		-0.147333	0.0561735	0.0445349
157.2		-0.157087	0.0409212	0.0551824
157.3		-0.167763	0.0229327	0.0654445
157.4		-0.178935	0.00255956	0.0753493
157.5		-0.190185	-0.0197948	0.0849314
157.6		-0.201107	-0.0437038	0.0942132
157.7		-0.211355	-0.0687202	0.103243
157.8		-0.220639	-0.0944283	0.112042
157.9		-0.228757	-0.12041	0.120666
158		-0.235591	-0.146277	0.129116
158.1		-0.241072	-0.171652	0.137439
158.2		-0.24518	-0.196225	0.145641
158.3		-0.247962	-0.21974	0.153727
158.4		-0.249478	-0.241977	0.161673
158.5		-0.249824	-0.262824	0.169461
158.6		-0.249087	-0.28215	0.177068
158.7		-0.247368	-0.299907	0.184455
158.8		-0.244719	-0.316077	0.191573
158.9		-0.241193	-0.330686	0.198388
159		-0.236827	-0.343754	0.204868
159.1		-0.231623	-0.3553	0.210977
159.2		-0.22554	-0.365406	0.216701
159.3		-0.21855	-0.374094	0.222041
159.4		-0.210648	-0.381401	0.227035
159.5		-0.201833	-0.387334	0.231721
159.6		-0.192112	-0.391936	0.236161
159.7		-0.181523	-0.395201	0.240422
159.8		-0.170144	-0.397115	0.244565
159.9		-0.158083	-0.397685	0.24868
160		-0.145524	-0.396868	0.252847
160.1		-0.132674	-0.394669	0.257145
160.2		-0.119782	-0.391063	0.261661
160.3		-0.107076	-0.386061	0.266485
160.4		-0.0947999	-0.379666	0.27165
160.5		-0.0832222	-0.371915	0.27719
160.6		-0.0725782	-0.362847	0.283127
160.7		-0.0631026	-0.352524	0.289515
160.8		-0.0549809	-0.34103	0.296354
160.9		-0.0483649	-0.328457	0.30361
161		-0.0433202	-0.31493	0.311275
161.1		-0.0398933	-0.300564	0.319263
161.2		-0.0380549	-0.285523	0.327526
161.3		-0.0377287	-0.269941	0.335978
161.4		-0.0387856	-0.253991	0.344552
161.5		-0.0410268	-0.237844	0.353153
161.6		-0.0442385	-0.221676	0.361647
161.7		-0.0481227	-0.20566	0.369937
161.8		-0.0524058	-0.189941	0.377899
161.9		-0.0567948	-0.174679	0.385453
162		-0.0610106	-0.159955	0.392457
162.1		-0.0647672	-0.145865	0.398784
162.2		-0.0677866	-0.132454	0.40431
162.3		-0.0698411	-0.119758	0.408923
162.4		-0.0707079	-0.107732	0.412545
162.5		-0.0702569	-0.0963475	0.415077
162.6		-0.0684026	-0.0855345	0.416446
162.7		-0.0650885	-0.0751727	0.416558
162.8		-0.0602921	-0.0651128	0.41535
162.9		-0.0540595	-0.0552061	0.412758
163		-0.0464927	-0.0453068	0.40873
163.1		-0.0377156	-0.0352249	0.403236
163.2		-0.0278812	-0.0247833	0.396261
163.3		-0.0171775	-0.0138397	0.387816
163.4		-0.00575036	-0.00227882	0.37791
163.5		0.00621567	0.00999842	0.366591
163.6		0.0185918	0.0230057	0.353955
163.7		0.0312089	0.0367433	0.34013
163.8		0.0439839	0.0511696	0.325279
163.9		0.0568149	0.0661998	0.309609
164		0.0696862	0.0816889	0.293369
164.1		0.0825937	0.0974679	0.276861
164.2		0.0955662	0.11336	0.26043
164.3		0.108649	0.129182	0.244436
164.4		0.121867	0.144736	0.229206
164.5		0.135246	0.159828	0.215111
164.6		0.148818	0.174275	0.20246
164.7		0.162596	0.187894	0.191585
164.8		0.176539	0.200583	0.182747
164.9		0.190586	0.212242	0.17618
165		0.204643	0.222842	0.171986
165.1		0.218551	0.232355	0.170192
165.2		0.232146	0.240825	0.17074
165.3		0.245244	0.248324	0.173501
165.4		0.257636	0.254958	0.178257
165.5		0.269091	0.260866	0.184698
165.6		0.279376	0.266182	0.192492
165.7		0.288309	0.271053	0.201176
165.8		0.295737	0.275631	0.210307
165.9		0.301566	0.280034	0.219439
166		0.305732	0.284345	0.228183
166.1		0.308254	0.288619	0.236138
166.2		0.309166	0.292884	0.242945
166.3		0.308609	0.297153	0.248308
166.4		0.306722	0.30135	0.252006
166.5		0.303731	0.305416	0.253895
166.6		0.29984	0.309234	0.253926
166.7		0.295311	0.312696	0.252148
166.8		0.290376	0.31566	0.24864
166.9		0.285316	0.317955	0.243595
167		0.280344	0.319435	0.237247
167.1		0.275661	0.319979	0.229922
167.2		0.27138	0.319529	0.221937
167.3		0.267587	0.318028	0.213606
167.4		0.264317	0.315443	0.205225
167.5		0.261532	0.311843	0.197072
167.6		0.259169	0.307346	0.189415
167.7		0.257117	0.302106	0.182455
167.8		0.255225	0.296341	0.176386
167.9		0.253269	0.290305	0.171292
168		0.25106	0.284305	0.167231
168.1		0.248369	0.278685	0.164141
168.2		0.245005	0.273751	0.161932
168.3		0.240765	0.269849	0.16048
168.4		0.23551	0.267293	0.159653
168.5		0.229111	0.266406	0.15922
168.6		0.221497	0.26743	0.158975
168.7		0.212632	0.270554	0.15868
168.8		0.20255	0.275906	0.158153
168.9		0.191342	0.283509	0.157212
169		0.17916	0.293344	0.155704
169.1		0.166193	0.305292	0.153545
169.2		0.15262	0.319241	0.150643
169.3		0.138695	0.334965	0.146969
169.4		0.124677	0.352196	0.142502
169.5		0.110854	0.370584	0.137295
169.6		0.0975118	0.389724	0.131414
169.7		0.0849145	0.409255	0.124908
169.8		0.0733079	0.428781	0.117881
169.9		0.0629447	0.447971	0.110403
170		0.054021	0.466455	0.102566
170.1		0.0466959	0.483904	0.0944264
170.2		0.0410623	0.500022	0.0859745
170.3		0.037168	0.514581	0.0771899
170.4		0.0350232	0.527423	0.0679655
170.5		0.0345723	0.538407	0.0582329
170.6		0.0357341	0.547461	0.0479045
170.7		0.0383103	0.554541	0.0368533
170.8		0.042098	0.559697	0.0249644
170.9		0.046838	0.562953	0.012091
171		0.0523025	0.564373	-0.00187186
171.1		0.0582079	0.564035	-0.01703
171.2		0.0642588	0.562037	-0.0334284
171.3		0.0701161	0.558467	-0.0510479
171.4		0.0754443	0.553403	-0.0698228
171.5		0.0799654	0.546918	-0.0896266
171.6		0.0833773	0.539078	-0.110295
171.7		0.0854613	0.52993	-0.131592
171.8		0.0860012	0.519497	-0.153214
171.9		0.0848739	0.507822	-0.17483
172		0.0819657	0.49494	-0.19608
172.1		0.0772218	0.480894	-0.216597
172.2		0.0706457	0.46574	-0.236008
172.3		0.0622667	0.449547	-0.253956
172.4		0.0522354	0.432411	-0.270132
172.5		0.0407115	0.414448	-0.284265
172.6		0.0279291	0.395845	-0.29614
172.7		0.0141108	0.376798	-0.305572
172.8		-0.000452312	0.357527	-0.312447
172.9		-0.0154932	0.338318	-0.316718
173		-0.0307342	0.319444	-0.318382
173.1		-0.0458783	0.301189	-0.317515
173.2		-0.0606642	0.283804	-0.31424
173.3		-0.0748478	0.267545	-0.308758
173.4		-0.0882312	0.252595	-0.301268
173.5		-0.100632	0.239124	-0.291989
173.6		-0.111929	0.227207	-0.281133
173.7		-0.122069	0.216894	-0.268919
173.8		-0.131037	0.208118	-0.255586
173.9		-0.138904	0.200766	-0.241358
174		-0.145711	0.194655	-0.226457
174.1		-0.151581	0.189511	-0.211082
174.2		-0.156623	0.185044	-0.195426
174.3		-0.160982	0.180924	-0.179641
174.4		-0.164788	0.176866	-0.163875
174.5		-0.168202	0.17254	-0.148253
174.6		-0.17134	0.167672	-0.132904
174.7		-0.174322	0.161994	-0.117949
174.8		-0.177273	0.155353	-0.103466
174.9		-0.180295	0.147641	-0.0895668
175		-0.183493	0.138807	-0.0763272
175.1		-0.186918	0.128851	-0.0638249
175.2		-0.190622	0.117864	-0.0520905
175.3		-0.194625	0.105987	-0.0411783
175.4		-0.198948	0.0934337	-0.0310907
175.5		-0.203608	0.080393	-0.0218349
175.6		-0.208671	0.0670718	-0.0134021
175.7		-0.214151	0.0536508	-0.00580397
175.8		-0.220056	0.0402957	0.000979626
175.9		-0.226357	0.0271785	0.00698432
176		-0.233062	0.0143814	0.0122528
176.1		-0.240136	0.00196821	0.0168397
176.2		-0.247545	-0.0100678	0.0207625
176.3		-0.255189	-0.0217707	0.0240541
176.4		-0.262995	-0.0332214	0.0267019
176.5		-0.27083	-0.04451	0.0287554
176.6		-0.278565	-0.0557105	0.030179
176.7		-0.286016	-0.0669034	0.0309426
176.8		-0.293019	-0.0781503	0.030984
176.9		-0.299389	-0.089489	0.0303072
177		-0.304969	-0.100884	0.0288645
177.1		-0.309573	-0.112267	0.0266498
177.2		-0.313051	-0.123591	0.0236733
177.3		-0.315296	-0.134702	0.0199824
177.4		-0.316248	-0.145438	0.0156128
177.5		-0.315877	-0.155585	0.010632
177.6		-0.314199	-0.164958	0.00517074
177.7		-0.311264	-0.173391	-0.000609955
177.8		-0.30718	-0.180703	-0.00653306
177.9		-0.302088	-0.186803	-0.0123995
178		-0.296162	-0.191591	-0.0179978
178.1		-0.289558	-0.195043	-0.0231149
178.2		-0.282488	-0.197174	-0.0275289
178.3		-0.275166	-0.198037	-0.0310846
178.4		-0.26781	-0.197783	-0.0335834
178.5		-0.26057	-0.19653	-0.0348886
178.6		-0.253603	-0.194477	-0.0348779
178.7		-0.247029	-0.191801	-0.0334723
178.8		-0.240947	-0.188732	-0.0306284
178.9		-0.235417	-0.185457	-0.0263074
179		-0.230442	-0.182155	-0.0204902
179.1		-0.225994	-0.179018	-0.0131538
179.2		-0.221981	-0.176165	-0.00431158
179.3		-0.218313	-0.17371	0.00598901
179.4		-0.214863	-0.171695	0.0176857
179.5		-0.211506	-0.170148	0.0307286
179.6		-0.20807	-0.169059	0.0450681
179.7		-0.204427	-0.168417	0.0606385
179.8		-0.200445	-0.16818	0.0773553
179.9		-0.196	-0.168251	0.095083
180		-0.190995	-0.168529	0.113668
180.1		-0.185333	-0.16888	0.132923
180.2		-0.17899	-0.169168	0.152625
180.3		-0.171921	-0.169258	0.172542
180.4		-0.164211	-0.169008	0.192387
180.5		-0.15595	-0.168286	0.211826
180.6		-0.147272	-0.166974	0.230498
180.7		-0.13829	-0.164953	0.248023
180.8		-0.129182	-0.162108	0.264089
180.9		-0.120165	-0.158397	0.278352
181		-0.111444	-0.15381	0.290574
181.1		-0.103265	-0.148368	0.300524
181.2		-0.0958249	-0.142103	0.308055
181.3		-0.089338	-0.135084	0.313132
181.4		-0.0839049	-0.127446	0.315768
181.5		-0.0796069	-0.119358	0.316057
181.6		-0.076455	-0.111032	0.314161
181.7		-0.0744183	-0.102698	0.310356
181.8		-0.0734097	-0.0945891	0.304981
181.9		-0.073223	-0.086928	0.298378
182		-0.0736632	-0.0799325	0.29096
182.1		-0.0744314	-0.0738157	0.283095
182.2		-0.0752468	-0.0687384	0.275171
182.3		-0.0757888	-0.0648438	0.267498
182.4		-0.0757441	-0.0621848	0.260367
182.5		-0.0748149	-0.0607695	0.253991
182.6		-0.0727433	-0.060543	0.248518
182.7		-0.0693481	-0.0614193	0.24402
182.8		-0.0644921	-0.0632433	0.240446
182.9		-0.0581545	-0.0657996	0.237715
183		-0.050354	-0.0688412	0.235652
183.1		-0.0412211	-0.0721152	0.234066
183.2		-0.0309111	-0.075373	0.232724
183.3		-0.0196472	-0.078361	0.231403
183.4		-0.00771645	-0.0808557	0.229853
183.5		0.00460438	-0.0826519	0.227842
183.6		0.0170268	-0.0836067	0.2252
183.7		0.0292622	-0.0836053	0.221738
183.8		0.0410681	-0.0826144	0.21733
183.9		0.052256	-0.0806469	0.211887
184		0.0627318	-0.077778	0.205367
184.1		0.0724247	-0.0740911	0.197782
184.2		0.0813669	-0.0697122	0.189197
184.3		0.0896235	-0.0647953	0.179712
184.4		0.0973756	-0.0595028	0.169459
184.5		0.104794	-0.0539731	0.158604
184.6		0.112097	-0.0483342	0.147308
184.7		0.119511	-0.0426865	0.135786
184.8		0.127295	-0.0371032	0.124235
184.9		0.135668	-0.0316078	0.11285
185		0.144853	-0.0262219	0.101848
185.1		0.155001	-0.0209093	0.0914204
185.2		0.166253	-0.015585	0.0817422
185.3		0.178642	-0.0101757	0.0729423
185.4		0.192181	-0.00457701	0.0651845
185.5		0.206778	0.00129666	0.058574
185.6		0.222318	0.0075548	0.0532101
185.7		0.238584	0.0142395	0.0491496
185.8		0.255364	0.0213786	0.0464365
185.9		0.272401	0.0289746	0.0450702
186		0.28944	0.037008	0.0450292
186.1		0.306134	0.0454251	0.0462744
186.2		0.322177	0.0541325	0.0487342
186.3		0.337268	0.0629878	0.0523721
186.4		0.351148	0.0718492	0.0570571
186.5		0.363549	0.0805512	0.0626674
186.6		0.374273	0.0889393	0.0690503
186.7		0.383145	0.0968763	0.0761046
186.8		0.390048	0.104231	0.083662
186.9		0.394902	0.110928	0.0916007
187		0.397711	0.116911	0.0997748
187.1		0.398514	0.12217	0.108056
187.2		0.397413	0.126744	0.116316
187.3		0.394548	0.130704	0.124411
187.4		0.390102	0.134167	0.13221
187.5		0.384294	0.137291	0.139529
187.6		0.37739	0.140271	0.146196
187.7		0.36967	0.143351	0.152035
187.8		0.361439	0.146766	0.156893
187.9		0.352987	0.150716	0.16062
188		0.344588	0.155383	0.163074
188.1		0.336476	0.160903	0.164123
188.2		0.328888	0.16741	0.163664
188.3		0.322023	0.174976	0.161578
188.4		0.316036	0.183624	0.157813
188.5		0.310999	0.193334	0.152302
188.6		0.306888	0.203968	0.145059
188.7		0.303648	0.215348	0.136119
188.8		0.301182	0.227219	0.125552
188.9		0.299387	0.239325	0.11348
189		0.298075	0.251356	0.100027
189.1		0.29704	0.262997	0.0853701
189.2		0.296041	0.273915	0.0696914
189.3		0.294853	0.283779	0.0532141
189.4		0.293199	0.292329	0.0361611
189.5		0.290824	0.299302	0.0187616
189.6		0.287528	0.304545	0.00123904
189.7		0.283142	0.307918	-0.0162112
189.8		0.277551	0.309354	-0.0333857
189.9		0.270646	0.308867	-0.0501348
190		0.262397	0.30654	-0.066323
190.1		0.252755	0.302557	-0.0818117
190.2		0.24178	0.297156	-0.0965403
190.3		0.229543	0.290669	-0.110457
190.4		0.216189	0.283421	-0.123585
190.5		0.201877	0.275819	-0.135955
190.6		0.186781	0.268272	-0.147611
190.7		0.171096	0.261181	-0.158617
190.8		0.155008	0.254921	-0.169029
190.9		0.138723	0.249818	-0.178944
191		0.122405	0.246163	-0.188414
191.1		0.106267	0.244156	-0.197512
191.2		0.0904823	0.243939	-0.206267
191.3		0.0752312	0.245551	-0.214656
191.4		0.060662	0.248941	-0.22266
191.5		0.0469115	0.253961	-0.230218
191.6		0.0341239	0.260394	-0.2373
191.7		0.0224127	0.267951	-0.243759
191.8		0.0118526	0.2763	-0.249461
191.9		0.00248032	0.285083	-0.254268
192		-0.00568738	0.293902	-0.25803
192.1		-0.0126472	0.302362	-0.260678
192.2		-0.0184291	0.310108	-0.262164
192.3		-0.0230998	0.316832	-0.262488
192.4		-0.0267336	0.322269	-0.261636
192.5		-0.0294279	0.326216	-0.259676
192.6		-0.03133	0.328578	-0.256712
192.7		-0.0326247	0.329323	-0.252931
192.8		-0.0335153	0.328462	-0.248566
192.9		-0.0341559	0.326015	-0.243854
193		-0.0347426	0.3221	-0.239058
193.1		-0.0354241	0.31685	-0.23445
193.2		-0.0363794	0.310433	-0.230293
193.3		-0.0376963	0.302989	-0.226839
193.4		-0.0394757	0.29463	-0.224321
193.5		-0.0417567	0.285461	-0.222942
193.6		-0.0445617	0.275532	-0.222827
193.7		-0.0478825	0.264891	-0.224066
193.8		-0.0516908	0.2535	-0.226677
193.9		-0.0559695	0.24132	-0.230635
194		-0.0606473	0.228251	-0.23585
194.1		-0.0656276	0.214253	-0.2422
194.2		-0.0708206	0.199259	-0.249499
194.3		-0.0761368	0.183218	-0.257533
194.4		-0.0815317	0.166078	-0.266032
194.5		-0.0869489	0.147865	-0.274702
194.6		-0.0923753	0.128671	-0.283244
194.7		-0.0977507	0.108592	-0.291326
194.8		-0.10307	0.0878152	-0.298602
194.9		-0.108303	0.0665983	-0.304755
195		-0.11349	0.0452597	-0.309499
195.1		-0.118582	0.0241234	-0.312578
195.2		-0.123571	0.00355533	-0.313735
195.3		-0.128404	-0.0160865	-0.312747
195.4		-0.133086	-0.0344385	-0.309408
195.5		-0.137584	-0.0511758	-0.303587
195.6		-0.141899	-0.0659675	-0.295196
195.7		-0.145978	-0.0786189	-0.284235
195.8		-0.149831	-0.088956	-0.270775
195.9		-0.153467	-0.0969167	-0.254959
196		-0.156923	-0.102488	-0.236956
196.1		-0.160215	-0.105775	-0.217001
196.2		-0.16341	-0.106974	-0.1954
196.3		-0.166581	-0.106356	-0.172461
196.4		-0.169787	-0.104266	-0.148537
196.5		-0.173067	-0.101104	-0.12397
196.6		-0.176489	-0.0973041	-0.0991403
196.7		-0.180146	-0.0933206	-0.0744176
196.8		-0.184134	-0.0896078	-0.0501581
196.9		-0.188502	-0.0866224	-0.0266519
197		-0.193286	-0.0847939	-0.00419899
197.1		-0.198476	-0.0845221	0.0169806
197.2		-0.204044	-0.0861028	0.0366974
197.3		-0.209937	-0.0897924	0.0548141
197.4		-0.216086	-0.0957386	0.0712315
197.5		-0.222398	-0.104007	0.0859117
197.6		-0.228776	-0.114582	0.0988391
197.7		-0.235124	-0.127326	0.110057
197.8		-0.241372	-0.142065	0.119591
197.9		-0.247436	-0.158524	0.127544
198		-0.253216	-0.176364	0.13399
198.1		-0.258611	-0.195203	0.139059
198.2		-0.263543	-0.214612	0.142881
198.3		-0.267983	-0.234188	0.145606
198.4		-0.271927	-0.253491	0.147423
198.5		-0.27538	-0.272114	0.14848
198.6		-0.278315	-0.289681	0.148941
198.7		-0.280714	-0.305836	0.148965
198.8		-0.282583	-0.320298	0.148736
198.9		-0.28397	-0.332828	0.148416
199		-0.284914	-0.343314	0.148183
199.1		-0.285516	-0.35163	0.148175
199.2		-0.28585	-0.357776	0.148506
199.3		-0.286006	-0.361771	0.149282
199.4		-0.28607	-0.36367	0.150593
199.5		-0.286142	-0.363601	0.152492
199.6		-0.286371	-0.361715	0.154981
199.7		-0.286914	-0.358217	0.158026
[truncated: 5,003 more rows]

## Sheet: 16d13015.abf
	Current (pA)
time (ms)	10uM cocaine	30uM cocaine	100uM cocaine	300uM cocaine
0		-0.091414	0.273543	-0.0603796
0.0996094		-0.0656402	0.28507	-0.0746885
0.200195		-0.0394017	0.293602	-0.0889981
0.299805		-0.0135297	0.299261	-0.102994
0.400391		0.0111597	0.302222	-0.116391
0.5		0.0338767	0.302679	-0.128952
0.599609		0.0538787	0.300893	-0.14049
0.700195		0.0705262	0.297116	-0.150914
0.799805		0.0832732	0.291649	-0.160189
0.900391		0.0917268	0.284773	-0.168351
1		0.0955876	0.276812	-0.175502
1.09961		0.0947473	0.268072	-0.181826
1.2002		0.0892073	0.258853	-0.187536
1.2998		0.0791747	0.24943	-0.192908
1.40039		0.0649321	0.240062	-0.198219
1.5		0.0469289	0.230988	-0.203751
1.59961		0.0256663	0.222391	-0.209768
1.7002		0.00174708	0.214427	-0.216498
1.7998		-0.0241989	0.207175	-0.224107
1.90039		-0.0515084	0.200658	-0.232694
2		-0.0795327	0.194833	-0.242292
2.09961		-0.107676	0.189622	-0.252829
2.2002		-0.135352	0.184914	-0.264163
2.2998		-0.162062	0.180546	-0.276063
2.40039		-0.187357	0.176308	-0.288249
2.5		-0.210923	0.171955	-0.300342
2.59961		-0.232473	0.167266	-0.311961
2.7002		-0.251842	0.16201	-0.322708
2.7998		-0.268902	0.155989	-0.33223
2.90039		-0.283601	0.149015	-0.340129
3		-0.295955	0.140973	-0.346093
3.09961		-0.306018	0.131764	-0.349844
3.2002		-0.313905	0.121388	-0.351229
3.2998		-0.319691	0.109866	-0.350167
3.40039		-0.323497	0.0973261	-0.346703
3.5		-0.3254	0.0839214	-0.34094
3.59961		-0.325494	0.0699168	-0.333101
3.7002		-0.32386	0.0556132	-0.323475
3.7998		-0.320536	0.0414129	-0.312399
3.90039		-0.315562	0.0277259	-0.30025
4		-0.308926	0.0150253	-0.287385
4.09961		-0.30066	0.00377223	-0.274195
4.2002		-0.290766	-0.00553624	-0.260983
4.2998		-0.279304	-0.0124382	-0.248053
4.40039		-0.266332	-0.0164532	-0.235585
4.5		-0.25194	-0.0171645	-0.22372
4.59961		-0.236267	-0.0141899	-0.212466
4.7002		-0.219487	-0.00724769	-0.201782
4.7998		-0.201852	0.00387699	-0.191523
4.90039		-0.183631	0.0192937	-0.181479
5		-0.165174	0.0390293	-0.171388
5.09961		-0.146831	0.0629965	-0.160936
5.2002		-0.129013	0.0910102	-0.149809
5.2998		-0.112135	0.122764	-0.137673
5.40039		-0.0966026	0.157839	-0.124253
5.5		-0.0828269	0.195716	-0.109281
5.59961		-0.0711841	0.235823	-0.0925836
5.7002		-0.062017	0.277472	-0.0740125
5.7998		-0.0555729	0.319922	-0.0535321
5.90039		-0.0520068	0.36238	-0.0311632
6		-0.051365	0.404034	-0.0069915
6.09961		-0.0535904	0.444043	0.0188064
6.2002		-0.0585256	0.481592	0.0460168
6.2998		-0.0658656	0.515865	0.0743255
6.40039		-0.0752198	0.546117	0.103402
6.5		-0.0860478	0.571644	0.132857
6.59961		-0.0977656	0.591834	0.162345
6.7002		-0.109688	0.606148	0.191471
6.7998		-0.121135	0.614181	0.219912
6.90039		-0.131376	0.615607	0.247301
7		-0.139733	0.610278	0.273361
7.09961		-0.145542	0.598135	0.297815
7.2002		-0.148266	0.579318	0.320489
7.2998		-0.147426	0.554047	0.341219
7.40039		-0.142724	0.522707	0.359918
7.5		-0.133953	0.485758	0.376527
7.59961		-0.121116	0.443849	0.391097
7.7002		-0.10431	0.397709	0.403682
7.7998		-0.0838362	0.348209	0.414425
7.90039		-0.0600863	0.296202	0.423447
8		-0.033635	0.242631	0.430937
8.09961		-0.00510013	0.188394	0.437036
8.2002		0.0247979	0.134416	0.441933
8.2998		0.0553421	0.0815775	0.445784
8.40039		0.0857673	0.0307335	0.448766
8.5		0.11536	-0.0173773	0.451003
8.59961		0.143443	-0.0621279	0.452609
8.7002		0.169413	-0.10301	0.453688
8.7998		0.192713	-0.139658	0.454312
8.90039		0.2129	-0.171823	0.454528
9		0.229661	-0.199401	0.454371
9.09961		0.242801	-0.222423	0.453876
9.2002		0.252223	-0.241055	0.453029
9.2998		0.257918	-0.255591	0.451839
9.40039		0.259984	-0.266411	0.45029
9.5		0.258615	-0.273976	0.448385
9.59961		0.254098	-0.278772	0.4461
9.7002		0.246805	-0.281321	0.443427
9.7998		0.237132	-0.282127	0.440343
9.90039		0.22551	-0.281693	0.436831
10		0.212397	-0.280466	0.432844
10.0996		0.198283	-0.278847	0.428337
10.2002		0.183626	-0.277125	0.423227
10.2998		0.168868	-0.275538	0.417446
10.4004		0.154422	-0.274202	0.410908
10.5		0.140675	-0.27318	0.403521
10.5996		0.127962	-0.272427	0.395183
10.7002		0.116549	-0.27184	0.385822
10.7998		0.106634	-0.271235	0.375374
10.9004		0.0983292	-0.270389	0.363824
11		0.0917373	-0.269056	0.351179
11.0996		0.0868683	-0.266945	0.337511
11.2002		0.0836975	-0.263819	0.322925
11.2998		0.0820962	-0.259435	0.307582
11.4004		0.0819302	-0.253624	0.291674
11.5		0.0830171	-0.246216	0.275487
11.5996		0.0851674	-0.237176	0.259323
11.7002		0.0881757	-0.226485	0.243566
11.7998		0.0918048	-0.214259	0.22858
11.9004		0.0958454	-0.200641	0.214751
12		0.100062	-0.185897	0.202427
12.0996		0.104264	-0.170284	0.191985
12.2002		0.108233	-0.154169	0.183728
12.2998		0.111821	-0.137935	0.177941
12.4004		0.114858	-0.122035	0.174803
12.5		0.117223	-0.106876	0.174443
12.5996		0.118783	-0.0928914	0.176907
12.7002		0.119433	-0.0804659	0.182184
12.7998		0.119088	-0.0699422	0.190169
12.9004		0.117681	-0.0615779	0.200668
13		0.115181	-0.055556	0.213444
13.0996		0.111558	-0.0519805	0.228182
13.2002		0.106834	-0.0508615	0.24454
13.2998		0.101051	-0.0521052	0.26211
13.4004		0.0942964	-0.0555252	0.280495
13.5		0.0866984	-0.0608633	0.299233
13.5996		0.0784448	-0.0677932	0.31789
13.7002		0.0697374	-0.0759255	0.33599
13.7998		0.0607735	-0.0848256	0.353123
13.9004		0.05174	-0.0940457	0.368874
14		0.042812	-0.103145	0.382884
14.0996		0.0341726	-0.111732	0.394802
14.2002		0.0259646	-0.119452	0.404343
14.2998		0.0182913	-0.126035	0.411239
14.4004		0.0111934	-0.131282	0.415273
14.5		0.00465098	-0.135086	0.416269
14.5996		-0.00141061	-0.137407	0.414124
14.7002		-0.00714025	-0.138336	0.408781
14.7998		-0.0127421	-0.138025	0.400234
14.9004		-0.0184687	-0.136706	0.388542
15		-0.0245511	-0.134667	0.373803
15.0996		-0.0312793	-0.132211	0.356186
15.2002		-0.038889	-0.129636	0.335897
15.2998		-0.0476394	-0.127233	0.313227
15.4004		-0.0576989	-0.125238	0.288465
15.5		-0.0692089	-0.123848	0.261973
15.5996		-0.0822169	-0.123189	0.234082
15.7002		-0.0966897	-0.123323	0.205223
15.7998		-0.112516	-0.124221	0.175802
15.9004		-0.129504	-0.125745	0.146274
16		-0.147408	-0.127679	0.117024
16.0996		-0.165929	-0.129741	0.08846
16.2002		-0.184744	-0.13162	0.0609276
16.2998		-0.203514	-0.133005	0.034747
16.4004		-0.221903	-0.133606	0.0101728
16.5		-0.239611	-0.133144	-0.0125953
16.5996		-0.256351	-0.131399	-0.0333925
16.7002		-0.271917	-0.128169	-0.0521591
16.7998		-0.286126	-0.123347	-0.0688639
16.9004		-0.298921	-0.116904	-0.0835658
17		-0.310256	-0.108926	-0.0963352
17.0996		-0.320178	-0.0995525	-0.107341
17.2002		-0.328767	-0.0890021	-0.116723
17.2998		-0.336167	-0.0775332	-0.124679
17.4004		-0.342502	-0.0654678	-0.131362
17.5		-0.347931	-0.0531149	-0.136965
17.5996		-0.35259	-0.0408107	-0.141611
17.7002		-0.356622	-0.0288323	-0.145465
17.7998		-0.360121	-0.0174336	-0.1486
17.9004		-0.363143	-0.00679296	-0.151106
18		-0.365717	0.00294745	-0.152982
18.0996		-0.367813	0.0117136	-0.154282
18.2002		-0.369364	0.0194755	-0.154963
18.2998		-0.370237	0.0262848	-0.155014
18.4004		-0.370293	0.0322088	-0.154377
18.5		-0.369373	0.0373751	-0.153026
18.5996		-0.36736	0.0419267	-0.150893
18.7002		-0.364126	0.0460087	-0.147927
18.7998		-0.35958	0.0497596	-0.144083
18.9004		-0.353649	0.053287	-0.139349
19		-0.346367	0.0566988	-0.133719
19.0996		-0.337789	0.0600503	-0.127208
19.2002		-0.328057	0.0634015	-0.119828
19.2998		-0.317352	0.0667421	-0.111571
19.4004		-0.305928	0.0700671	-0.10247
19.5		-0.294085	0.0733076	-0.0925802
19.5996		-0.282146	0.0764516	-0.081967
19.7002		-0.270464	0.0794446	-0.0707165
19.7998		-0.259356	0.0822793	-0.0589291
19.9004		-0.249163	0.084895	-0.0467125
20		-0.240156	0.0872748	-0.0342227
20.0996		-0.23258	0.0894036	-0.0216252
20.2002		-0.226564	0.0913092	-0.00913687
20.2998		-0.222202	0.0930326	0.00302748
20.4004		-0.219455	0.094622	0.0146205
20.5		-0.218233	0.0961526	0.0254003
20.5996		-0.218303	0.0976745	0.0351029
20.7002		-0.219398	0.0992533	0.043498
20.7998		-0.22115	0.100885	0.0503441
20.9004		-0.223154	0.102573	0.0554692
21		-0.224945	0.104294	0.0587126
21.0996		-0.226047	0.106042	0.06001
21.2002		-0.225999	0.107749	0.059315
21.2998		-0.22436	0.109321	0.0566893
21.4004		-0.220757	0.110668	0.0522276
21.5		-0.21486	0.11168	0.04614
21.5996		-0.206455	0.112264	0.0386176
21.7002		-0.195383	0.112347	0.0299205
21.7998		-0.181626	0.111918	0.020265
21.9004		-0.165228	0.111	0.00991443
22		-0.146366	0.109687	-0.000917188
22.0996		-0.125305	0.108132	-0.0119969
22.2002		-0.102426	0.106555	-0.0231788
22.2998		-0.0781608	0.105238	-0.0343049
22.4004		-0.0529759	0.104513	-0.0453185
22.5		-0.027398	0.104732	-0.0561861
22.5996		-0.00194321	0.10626	-0.0669659
22.7002		0.0228805	0.109486	-0.0777043
22.7998		0.0466288	0.114777	-0.0884657
22.9004		0.068873	0.122463	-0.0993096
23		0.0892704	0.132768	-0.110282
23.0996		0.10755	0.145829	-0.121421
23.2002		0.123533	0.161666	-0.13271
23.2998		0.137125	0.180201	-0.144104
23.4004		0.148306	0.201197	-0.155467
23.5		0.157139	0.224316	-0.166632
23.5996		0.16373	0.249095	-0.177341
23.7002		0.16823	0.275002	-0.187371
23.7998		0.170795	0.30141	-0.196431
23.9004		0.171616	0.32765	-0.204256
24		0.170849	0.353015	-0.21055
24.0996		0.168608	0.376834	-0.215061
24.2002		0.164984	0.398457	-0.217572
24.2998		0.160014	0.417321	-0.217936
24.4004		0.153724	0.43291	-0.216057
24.5		0.14605	0.444826	-0.211892
24.5996		0.136921	0.452759	-0.205506
24.7002		0.126242	0.456516	-0.196993
24.7998		0.113941	0.456021	-0.186547
24.9004		0.0999635	0.45133	-0.174382
25		0.0842708	0.442603	-0.160812
25.0996		0.0669187	0.430094	-0.146112
25.2002		0.04803	0.414141	-0.130627
25.2998		0.0278581	0.395175	-0.114657
25.4004		0.00667986	0.373687	-0.0985324
25.5		-0.0150905	0.350208	-0.0825093
25.5996		-0.0369851	0.325325	-0.066833
25.7002		-0.0584416	0.299642	-0.0516799
25.7998		-0.0788672	0.273774	-0.0371903
25.9004		-0.0976539	0.248334	-0.0234253
26		-0.114207	0.223925	-0.0104036
26.0996		-0.12801	0.201123	0.0019059
26.2002		-0.138609	0.180448	0.0135782
26.2998		-0.145685	0.162371	0.0247122
26.4004		-0.149001	0.147257	0.0354437
26.5		-0.148475	0.135377	0.0459088
26.5996		-0.144127	0.126883	0.0562388
26.7002		-0.136162	0.121844	0.0665321
26.7998		-0.124889	0.120188	0.076886
26.9004		-0.110765	0.121735	0.0873436
27		-0.0942884	0.126175	0.0979145
27.0996		-0.0760544	0.133126	0.108558
27.2002		-0.0566488	0.142118	0.119203
27.2998		-0.0366868	0.152619	0.129697
27.4004		-0.0167306	0.164057	0.139874
27.5		0.00268552	0.17585	0.149517
27.5996		0.02113	0.187394	0.158428
27.7002		0.0382422	0.198116	0.166383
27.7998		0.053768	0.207512	0.1732
27.9004		0.0675474	0.215166	0.178685
28		0.0795395	0.220764	0.182717
28.0996		0.089783	0.224054	0.185168
28.2002		0.0984024	0.224923	0.186031
28.2998		0.105573	0.223327	0.185309
28.4004		0.111539	0.219351	0.183115
28.5		0.116576	0.213106	0.179563
28.5996		0.120982	0.204839	0.174869
28.7002		0.125044	0.194794	0.169273
28.7998		0.129041	0.183299	0.163107
28.9004		0.13321	0.170653	0.156678
29		0.137757	0.157189	0.150345
29.0996		0.142832	0.143195	0.144416
29.2002		0.148527	0.12893	0.13922
29.2998		0.154858	0.114607	0.135026
29.4004		0.161798	0.100383	0.132081
29.5		0.16924	0.0864058	0.130544
29.5996		0.17703	0.0727334	0.130558
29.7002		0.184962	0.0593816	0.132186
29.7998		0.192793	0.0463031	0.135429
29.9004		0.200232	0.0334358	0.140202
30		0.20695	0.020688	0.146348
30.0996		0.212622	0.0079597	0.153659
30.2002		0.216909	-0.00485031	0.16188
30.2998		0.219491	-0.0178601	0.170718
30.4004		0.220059	-0.0311518	0.179891
30.5		0.218394	-0.0447908	0.189097
30.5996		0.2143	-0.058811	0.198061
30.7002		0.207667	-0.0732564	0.206526
30.7998		0.198431	-0.0881413	0.214283
30.9004		0.186621	-0.103448	0.221188
31		0.172327	-0.119117	0.227159
31.0996		0.155739	-0.135064	0.232201
31.2002		0.137115	-0.151202	0.236381
31.2998		0.116774	-0.167402	0.239837
31.4004		0.0951012	-0.183547	0.242763
31.5		0.0724948	-0.199495	0.245403
31.5996		0.0494127	-0.215118	0.24803
31.7002		0.0262604	-0.230258	0.250936
31.7998		0.00346378	-0.244774	0.254422
31.9004		-0.0186276	-0.258519	0.258766
32		-0.0396446	-0.271339	0.264215
32.0996		-0.0593137	-0.283104	0.270927
32.2002		-0.0774495	-0.293692	0.279019
32.2998		-0.0939398	-0.303003	0.288515
32.4004		-0.108764	-0.310916	0.299349
32.5		-0.121933	-0.317356	0.311329
32.5996		-0.133563	-0.322254	0.324232
32.7002		-0.143785	-0.325584	0.337711
32.7998		-0.152816	-0.327291	0.351375
32.9004		-0.160854	-0.32738	0.364741
33		-0.168139	-0.325838	0.377349
33.0996		-0.174883	-0.322718	0.388655
33.2002		-0.181282	-0.318058	0.398175
33.2998		-0.187506	-0.31196	0.40539
33.4004		-0.193654	-0.304517	0.409862
33.5		-0.1998	-0.295878	0.411166
33.5996		-0.205923	-0.286188	0.408968
33.7002		-0.211978	-0.275644	0.403001
33.7998		-0.217867	-0.264423	0.393094
33.9004		-0.223495	-0.25277	0.379136
34		-0.228717	-0.240899	0.361117
34.0996		-0.233384	-0.22905	0.339134
34.2002		-0.237334	-0.217423	0.313351
34.2998		-0.240418	-0.206237	0.284056
34.4004		-0.242532	-0.195657	0.25159
34.5		-0.243583	-0.185831	0.216404
34.5996		-0.243545	-0.176854	0.178999
34.7002		-0.242397	-0.168786	0.13997
34.7998		-0.240207	-0.161609	0.0999407
34.9004		-0.237041	-0.155265	0.0596283
35		-0.233014	-0.149636	0.0197455
35.0996		-0.22826	-0.144588	-0.0189381
35.2002		-0.222922	-0.139927	-0.0556741
35.2998		-0.217129	-0.135412	-0.0896959
35.4004		-0.210991	-0.13077	-0.120303
35.5		-0.204609	-0.125725	-0.146836
35.5996		-0.19806	-0.119991	-0.16874
35.7002		-0.191371	-0.113319	-0.185541
35.7998		-0.184552	-0.10549	-0.196889
35.9004		-0.177563	-0.0963329	-0.202571
36		-0.170376	-0.0857208	-0.202515
36.0996		-0.162898	-0.0735878	-0.196822
36.2002		-0.155078	-0.0599313	-0.185749
36.2998		-0.14681	-0.0448177	-0.169704
36.4004		-0.138051	-0.0283558	-0.149241
36.5		-0.128737	-0.0107264	-0.125008
36.5996		-0.118865	0.00783668	-0.0977764
36.7002		-0.108431	0.0270493	-0.0683646
36.7998		-0.0974914	0.0466041	-0.0376588
36.9004		-0.0861161	0.066172	-0.00652292
37		-0.074426	0.0854096	0.0241616
37.0996		-0.0625475	0.103945	0.0536062
37.2002		-0.0506472	0.121447	0.0810658
37.2998		-0.0388672	0.137583	0.10592
37.4004		-0.027379	0.152066	0.127614
37.5		-0.0163262	0.164621	0.145734
37.5996		-0.00585991	0.175058	0.159964
37.7002		0.00389566	0.183224	0.170115
37.7998		0.0128242	0.189004	0.176106
37.9004		0.0208527	0.192353	0.177951
38		0.0279154	0.193266	0.175766
38.0996		0.0339653	0.191811	0.169721
38.2002		0.0389568	0.188103	0.160057
38.2998		0.0428636	0.182341	0.147031
38.4004		0.0456178	0.174734	0.130961
38.5		0.0471604	0.165566	0.112172
38.5996		0.0474234	0.15511	0.0910175
38.7002		0.0463607	0.1437	0.0678326
38.7998		0.0439193	0.13163	0.0430079
38.9004		0.0400719	0.119215	0.0168957
39		0.0347824	0.106724	-0.0101084
39.0996		0.0280679	0.0944308	-0.0376237
39.2002		0.0199552	0.08257	-0.0652402
39.2998		0.0105409	0.0713571	-0.0925616
39.4004		-8.11792e-05	0.0609591	-0.119174
39.5		-0.0117626	0.0515126	-0.144682
39.5996		-0.024336	0.0430948	-0.168682
39.7002		-0.0375697	0.0357415	-0.19078
39.7998		-0.0512154	0.0294397	-0.210622
39.9004		-0.0650148	0.0241814	-0.22787
40		-0.0787235	0.0199248	-0.242225
40.0996		-0.0921118	0.0166404	-0.253431
40.2002		-0.104956	0.0142787	-0.261311
40.2998		-0.117098	0.0127958	-0.265713
40.4004		-0.128399	0.0121547	-0.266545
40.5		-0.138824	0.0123366	-0.263769
40.5996		-0.148342	0.0133694	-0.257429
40.7002		-0.157019	0.0152761	-0.247617
40.7998		-0.164917	0.0181236	-0.234474
40.9004		-0.172207	0.0220061	-0.218196
41		-0.179039	0.0270553	-0.199053
41.0996		-0.185619	0.033408	-0.177343
41.2002		-0.192136	0.0412126	-0.153431
41.2998		-0.198775	0.0505867	-0.127713
41.4004		-0.205713	0.0616527	-0.100636
41.5		-0.213097	0.0745232	-0.0726864
41.5996		-0.221056	0.0892553	-0.044369
41.7002		-0.229628	0.105883	-0.0162333
41.7998		-0.238816	0.124361	0.0111651
41.9004		-0.248519	0.144622	0.0372501
42		-0.258609	0.166494	0.0614459
42.0996		-0.268877	0.189798	0.0831635
42.2002		-0.279099	0.21428	0.101875
42.2998		-0.288963	0.239655	0.117063
42.4004		-0.298093	0.265563	0.12833
42.5		-0.306082	0.291663	0.135328
42.5996		-0.312473	0.317576	0.137855
42.7002		-0.316829	0.34295	0.135776
42.7998		-0.318684	0.367385	0.129126
42.9004		-0.317641	0.39056	0.118027
43		-0.313305	0.412147	0.102792
43.0996		-0.30537	0.431897	0.0837945
43.2002		-0.293585	0.449574	0.061548
43.2998		-0.277811	0.465026	0.0366318
43.4004		-0.258029	0.478108	0.00972586
43.5		-0.234311	0.48879	-0.0184708
43.5996		-0.206864	0.49706	-0.0472328
43.7002		-0.175992	0.502984	-0.0758461
43.7998		-0.142146	0.506647	-0.103658
43.9004		-0.105862	0.508197	-0.13005
44		-0.0678007	0.507786	-0.154519
44.0996		-0.0286885	0.505628	-0.176617
44.2002		0.0107339	0.501916	-0.196074
44.2998		0.049677	0.49689	-0.212677
44.4004		0.0874021	0.490765	-0.226358
44.5		0.123155	0.483787	-0.237131
44.5996		0.156276	0.476143	-0.245131
44.7002		0.186147	0.468035	-0.250567
44.7998		0.212288	0.459617	-0.253707
44.9004		0.234332	0.451048	-0.254868
45		0.252048	0.442434	-0.254364
45.0996		0.265352	0.433903	-0.252541
45.2002		0.274273	0.425498	-0.249694
45.2998		0.278986	0.417253	-0.246132
45.4004		0.279766	0.409142	-0.24207
45.5		0.276998	0.401151	-0.237722
45.5996		0.271145	0.393206	-0.233198
45.7002		0.262728	0.385251	-0.22858
45.7998		0.25232	0.377201	-0.223855
45.9004		0.240478	0.368978	-0.21898
46		0.227808	0.360488	-0.213855
46.0996		0.214859	0.351656	-0.208343
46.2002		0.202192	0.342404	-0.202321
46.2998		0.190271	0.332674	-0.195627
46.4004		0.179561	0.322433	-0.188116
46.5		0.170424	0.311691	-0.179599
46.5996		0.16319	0.300489	-0.169947
46.7002		0.158069	0.288915	-0.159049
46.7998		0.15524	0.277118	-0.146893
46.9004		0.154779	0.265288	-0.133453
47		0.156725	0.253638	-0.118795
47.0996		0.161008	0.242406	-0.10299
47.2002		0.167539	0.231862	-0.086179
47.2998		0.176146	0.222294	-0.0685154
47.4004		0.186656	0.213993	-0.0502069
47.5		0.198815	0.207243	-0.0314523
47.5996		0.212357	0.202279	-0.0125098
47.7002		0.22694	0.199322	0.00638858
47.7998		0.242216	0.198548	0.0250035
47.9004		0.257805	0.200075	0.0431269
48		0.273385	0.203949	0.0605339
48.0996		0.288659	0.210166	0.0770811
48.2002		0.303391	0.218638	0.0926259
48.2998		0.317377	0.22921	0.107075
48.4004		0.330472	0.241644	0.120347
48.5		0.342598	0.255671	0.132434
48.5996		0.353752	0.270957	0.143332
48.7002		0.363996	0.287148	0.153091
48.7998		0.373469	0.303846	0.161756
48.9004		0.382379	0.320637	0.169406
49		0.390954	0.337113	0.17612
49.0996		0.399445	0.352855	0.182004
49.2002		0.40813	0.36748	0.187152
49.2998		0.417263	0.380639	0.19167
49.4004		0.427063	0.391992	0.195669
49.5		0.437694	0.401209	0.199255
49.5996		0.449275	0.408036	0.202513
49.7002		0.461841	0.412239	0.20553
49.7998		0.475349	0.413648	0.208384
49.9004		0.489683	0.412112	0.211145
50		0.504652	0.407546	0.213899
50.0996		0.520029	0.399884	0.216708
50.2002		0.535537	0.389104	0.219617
50.2998		0.550891	0.375249	0.222643
50.4004		0.565748	0.35841	0.225797
50.5		0.579805	0.338725	0.229083
50.5996		0.592765	0.316373	0.232499
50.7002		0.604415	0.291604	0.23603
50.7998		0.614555	0.264718	0.239637
50.9004		0.623074	0.236033	0.24327
51		0.629882	0.205874	0.246891
51.0996		0.634995	0.174601	0.250451
51.2002		0.638456	0.142591	0.253907
51.2998		0.640377	0.110202	0.257195
51.4004		0.640928	0.0778117	0.260265
51.5		0.640275	0.0457467	0.263066
51.5996		0.638618	0.0143633	0.265564
51.7002		0.636115	-0.0160387	0.267719
51.7998		0.632963	-0.0451661	0.269515
51.9004		0.629311	-0.0728212	0.270913
52		0.625325	-0.0987935	0.271892
52.0996		0.621065	-0.122949	0.272422
52.2002		0.616577	-0.145141	0.272479
52.2998		0.61187	-0.165282	0.272023
52.4004		0.606892	-0.183286	0.271019
52.5		0.601578	-0.199104	0.269426
52.5996		0.595817	-0.212651	0.267184
52.7002		0.589524	-0.223892	0.264237
52.7998		0.582565	-0.232783	0.260528
52.9004		0.574838	-0.239303	0.256031
53		0.566214	-0.243427	0.25069
53.0996		0.556622	-0.245175	0.24448
53.2002		0.54601	-0.24456	0.237348
53.2998		0.534332	-0.241603	0.229294
53.4004		0.52159	-0.236313	0.220291
53.5		0.507827	-0.228772	0.210368
53.5996		0.493117	-0.219074	0.199503
53.7002		0.477561	-0.207365	0.187701
53.7998		0.461314	-0.193791	0.174929
53.9004		0.444558	-0.178545	0.161187
54		0.42749	-0.161823	0.146441
54.0996		0.410317	-0.143879	0.130673
54.2002		0.393281	-0.124977	0.113863
54.2998		0.376615	-0.105406	0.0959891
54.4004		0.360555	-0.085474	0.077027
54.5		0.345326	-0.065498	0.0569823
54.5996		0.33113	-0.0457992	0.0358953
54.7002		0.318191	-0.0266799	0.0138309
54.7998		0.306674	-0.0084316	-0.00908158
54.9004		0.296742	0.00867278	-0.0326865
55		0.288459	0.0244032	-0.0567498
55.0996		0.281863	0.0385454	-0.0810219
55.2002		0.276912	0.0509283	-0.105172
55.2998		0.273521	0.0614154	-0.128851
55.4004		0.271551	0.0699392	-0.151628
55.5		0.27078	0.0764627	-0.173102
55.5996		0.270944	0.0810288	-0.192838
55.7002		0.271739	0.0836859	-0.210472
55.7998		0.272819	0.0845374	-0.225655
55.9004		0.273824	0.0837011	-0.238115
56		0.274359	0.0813711	-0.247645
56.0996		0.274051	0.0777218	-0.254138
56.2002		0.272514	0.0729878	-0.25759
56.2998		0.269454	0.0673799	-0.258105
56.4004		0.264588	0.0611361	-0.25591
56.5		0.257757	0.0544648	-0.251333
56.5996		0.248836	0.0475867	-0.244805
56.7002		0.237822	0.0406993	-0.236812
56.7998		0.224722	0.0340286	-0.2279
56.9004		0.209653	0.0277798	-0.21863
57		0.192762	0.0221643	-0.209587
57.0996		0.174296	0.0173871	-0.201336
57.2002		0.154479	0.0136591	-0.194406
57.2998		0.133599	0.0111674	-0.189247
57.4004		0.111933	0.0101104	-0.18623
57.5		0.0897952	0.0106767	-0.185601
57.5996		0.0674322	0.0130154	-0.187489
57.7002		0.0451134	0.0172435	-0.191905
57.7998		0.0230631	0.0234395	-0.198762
57.9004		0.00149434	0.031675	-0.207831
58		-0.0194397	0.0419717	-0.218811
58.0996		-0.0395997	0.0543082	-0.231284
58.2002		-0.0588743	0.0686007	-0.244801
58.2998		-0.0771637	0.0847087	-0.258809
58.4004		-0.0943847	0.102392	-0.272774
58.5		-0.110474	0.121382	-0.286129
58.5996		-0.125395	0.141363	-0.298367
58.7002		-0.139091	0.161988	-0.308969
58.7998		-0.151531	0.182862	-0.317515
58.9004		-0.162671	0.203583	-0.323612
59		-0.1725	0.223748	-0.326965
59.0996		-0.180988	0.242961	-0.327315
59.2002		-0.188166	0.260847	-0.324528
59.2998		-0.194054	0.27708	-0.318539
59.4004		-0.198736	0.291339	-0.309391
59.5		-0.202249	0.303389	-0.297186
59.5996		-0.204693	0.31304	-0.282121
59.7002		-0.206114	0.320237	-0.264447
59.7998		-0.20662	0.324936	-0.244485
59.9004		-0.206294	0.327228	-0.222605
60		-0.205251	0.32722	-0.199222
60.0996		-0.203518	0.32517	-0.174798
60.2002		-0.201132	0.321342	-0.149798
60.2998		-0.198093	0.316102	-0.124703
60.4004		-0.194366	0.309827	-0.0999834
60.5		-0.189895	0.302967	-0.0761097
60.5996		-0.184608	0.295956	-0.0535013
60.7002		-0.178443	0.289256	-0.0325751
60.7998		-0.171304	0.283314	-0.0136922
60.9004		-0.163119	0.278525	0.00283222
61		-0.153789	0.275269	0.0167584
61.0996		-0.143302	0.273858	0.0278994
61.2002		-0.131654	0.274557	0.0361285
61.2998		-0.118955	0.277486	0.0413879
61.4004		-0.105362	0.282682	0.0436764
61.5		-0.0911414	0.290117	0.043048
61.5996		-0.076591	0.299701	0.0396247
61.7002		-0.06211	0.311257	0.0335693
61.7998		-0.0481694	0.324533	0.0250719
61.9004		-0.0352778	0.339218	0.0143763
62		-0.0239688	0.354936	0.00174848
62.0996		-0.01474	0.371307	-0.0124892
62.2002		-0.00810256	0.387899	-0.0280426
62.2998		-0.00444899	0.404294	-0.0445535
62.4004		-0.00411958	0.420074	-0.0616543
62.5		-0.00732035	0.434863	-0.078925
62.5996		-0.0141698	0.448295	-0.0959538
62.7002		-0.0246322	0.46006	-0.112286
62.7998		-0.0385287	0.46986	-0.127478
62.9004		-0.0555265	0.477463	-0.141055
63		-0.0751699	0.482661	-0.152592
63.0996		-0.0969283	0.485335	-0.161647
63.2002		-0.120199	0.48538	-0.167831
63.2998		-0.144353	0.482753	-0.170776
63.4004		-0.168736	0.477404	-0.170216
63.5		-0.192715	0.469315	-0.165933
63.5996		-0.215728	0.458464	-0.157822
63.7002		-0.237303	0.444856	-0.145886
63.7998		-0.25708	0.428475	-0.130246
63.9004		-0.274802	0.409341	-0.111148
64		-0.290347	0.387463	-0.0889245
64.0996		-0.303691	0.362901	-0.0640701
64.2002		-0.31493	0.335689	-0.0371244
64.2998		-0.324238	0.305914	-0.00875189
64.4004		-0.33185	0.273666	0.0203862
64.5		-0.338052	0.239126	0.0495602
64.5996		-0.34312	0.202512	0.078056
64.7002		-0.34733	0.164144	0.105145
64.7998		-0.350868	0.124372	0.130167
64.9004		-0.35389	0.0836674	0.152537
65		-0.356443	0.0425459	0.171762
65.0996		-0.358552	0.00161747	0.187485
65.2002		-0.360099	-0.0384742	0.199451
65.2998		-0.360929	-0.0770128	0.207551
65.4004		-0.360801	-0.113286	0.211747
65.5		-0.359455	-0.146557	0.212152
65.5996		-0.35658	-0.176122	0.208975
65.7002		-0.351832	-0.201319	0.202557
65.7998		-0.344893	-0.221585	0.193324
65.9004		-0.335469	-0.236487	0.181757
66		-0.323309	-0.245717	0.168404
66.0996		-0.308217	-0.249105	0.153821
66.2002		-0.290044	-0.246614	0.138644
66.2998		-0.26872	-0.238382	0.123449
66.4004		-0.24423	-0.224652	0.108846
66.5		-0.216649	-0.205849	0.0953727
66.5996		-0.186101	-0.182522	0.0835913
66.7002		-0.152819	-0.155347	0.0739696
66.7998		-0.117043	-0.125032	0.0669574
66.9004		-0.0790925	-0.0923488	0.0628869
67		-0.0392889	-0.0580859	0.0620417
67.0996		0.00196179	-0.0230568	0.0646023
67.2002		0.0442873	0.0119581	0.070674
67.2998		0.0872542	0.0462239	0.08025
67.4004		0.130482	0.0790772	0.0932481
67.5		0.173556	0.109945	0.109454
67.5996		0.216123	0.138319	0.128577
67.7002		0.257796	0.163789	0.150216
67.7998		0.29826	0.186052	0.173932
67.9004		0.337235	0.204894	0.199197
68		0.374502	0.220159	0.225471
68.0996		0.409852	0.231768	0.252157
68.2002		0.443154	0.239705	0.27867
68.2998		0.474312	0.244027	0.30439
68.4004		0.503284	0.244829	0.328751
68.5		0.530065	0.242262	0.351189
68.5996		0.554682	0.23651	0.371212
68.7002		0.577157	0.227784	0.38839
68.7998		0.597505	0.216312	0.402374
68.9004		0.615713	0.202361	0.412868
69		0.631755	0.18622	0.419668
69.0996		0.645584	0.168224	0.422637
69.2002		0.657117	0.148728	0.421712
69.2998		0.666234	0.128149	0.416893
69.4004		0.672787	0.106931	0.408255
69.5		0.676591	0.085528	0.395954
69.5996		0.677451	0.0644188	0.380198
69.7002		0.675151	0.0440932	0.361282
69.7998		0.669499	0.0250185	0.33953
69.9004		0.660291	0.00765742	0.315317
70		0.647388	-0.00757371	0.289053
70.0996		0.63067	-0.0203203	0.261193
70.2002		0.610132	-0.0303062	0.232239
70.2998		0.585819	-0.037317	0.2027
70.4004		0.557921	-0.0412692	0.173107
70.5		0.526699	-0.0421695	0.143979
70.5996		0.492543	-0.0401618	0.115855
70.7002		0.455932	-0.0354892	0.0892507
70.7998		0.417437	-0.0285067	0.0646555
70.9004		0.377702	-0.0196698	0.0425101
71		0.337411	-0.00952996	0.0232167
71.0996		0.297326	0.00127351	0.00711349
71.2002		0.258189	0.0120841	-0.00552079
71.2998		0.22076	0.0221959	-0.0144699
71.4004		0.185688	0.0309467	-0.0196046
71.5		0.15359	0.0376849	-0.0208724
71.5996		0.124938	0.0418709	-0.0182913
71.7002		0.100126	0.0430145	-0.0119436
71.7998		0.0793933	0.0407529	-0.00199678
71.9004		0.0628346	0.0347963	0.0113387
72		0.0504033	0.0250386	0.0277823
72.0996		0.0418942	0.0115028	0.0469907
72.2002		0.0369852	-0.00560904	0.0685631
72.2998		0.0352097	-0.0259774	0.0920627
72.4004		0.0360429	-0.0491351	0.117004
72.5		0.0388588	-0.0745135	0.142873
72.5996		0.043049	-0.10144	0.169142
72.7002		0.0479763	-0.129196	0.195261
72.7998		0.0530476	-0.157021	0.2207
72.9004		0.0577152	-0.184145	0.244909
73		0.0615336	-0.209835	0.267396
73.0996		0.0641512	-0.233426	0.287647
73.2002		0.0653086	-0.254371	0.305255
73.2998		0.0648682	-0.272201	0.319826
73.4004		0.0627951	-0.286598	0.331095
73.5		0.0591665	-0.297393	0.338813
73.5996		0.0541475	-0.304602	0.342859
73.7002		0.0479906	-0.308362	0.343158
73.7998		0.041016	-0.30897	0.339751
73.9004		0.0336015	-0.306814	0.332738
74		0.026144	-0.302401	0.32232
74.0996		0.0190373	-0.29628	0.30875
74.2002		0.012642	-0.289059	0.292333
74.2998		0.00729694	-0.281303	0.273423
74.4004		0.00331683	-0.273566	0.252401
74.5		0.000952022	-0.266307	0.229673
74.5996		0.00040675	-0.259909	0.205644
74.7002		0.00181123	-0.25461	0.180732
74.7998		0.00523647	-0.250571	0.155335
74.9004		0.0106695	-0.247796	0.129864
75		0.0180385	-0.246194	0.104694
75.0996		0.0272365	-0.245516	0.0802144
75.2002		0.0380763	-0.245442	0.0567801
75.2998		0.050365	-0.245551	0.0347598
75.4004		0.0638325	-0.245381	0.0144619
75.5		0.0782288	-0.244436	-0.00378665
75.5996		0.0932458	-0.242234	-0.01971
75.7002		0.108604	-0.238308	-0.033023
75.7998		0.124024	-0.232242	-0.0434995
75.9004		0.139244	-0.223697	-0.0509371
76		0.154021	-0.212394	-0.0552134
76.0996		0.168102	-0.198151	-0.0562435
76.2002		0.181277	-0.180887	-0.0540041
76.2998		0.193338	-0.160634	-0.048548
76.4004		0.20412	-0.137519	-0.0399974
76.5		0.213453	-0.111776	-0.0285791
76.5996		0.22119	-0.0837227	-0.0145892
76.7002		0.227202	-0.0537478	0.00156458
76.7998		0.23136	-0.0222888	0.0194099
76.9004		0.233553	0.0101535	0.0383805
77		0.233669	0.0430405	0.0578588
77.0996		0.231589	0.0758123	0.0772059
77.2002		0.227206	0.107924	0.0957865
77.2998		0.220418	0.138831	0.112938
77.4004		0.211159	0.168045	0.12803
77.5		0.199372	0.195106	0.140455
77.5996		0.185022	0.219632	0.149716
77.7002		0.168106	0.24128	0.155358
77.7998		0.148658	0.25983	0.157094
77.9004		0.126761	0.275111	0.154688
78		0.102529	0.287089	0.148113
78.0996		0.0761343	0.295789	0.137415
78.2002		0.0477822	0.301354	0.12284
78.2998		0.0176893	0.303959	0.104701
78.4004		-0.0138926	0.303914	0.083488
78.5		-0.046677	0.301581	0.0597393
78.5996		-0.0803044	0.297427	0.0341248
78.7002		-0.114417	0.291936	0.0073456
78.7998		-0.148621	0.285634	-0.0198329
78.9004		-0.18254	0.279031	-0.0466698
79		-0.215754	0.27263	-0.0724318
79.0996		-0.247858	0.266915	-0.0964575
79.2002		-0.278414	0.262326	-0.11816
79.2998		-0.30703	0.259256	-0.137044
79.4004		-0.33328	0.257982	-0.152712
79.5		-0.356766	0.258682	-0.164857
79.5996		-0.377073	0.261394	-0.173325
79.7002		-0.393856	0.266076	-0.17807
79.7998		-0.406806	0.272579	-0.179164
79.9004		-0.415667	0.280663	-0.17675
80		-0.420247	0.289952	-0.17108
80.0996		-0.420405	0.300004	-0.162415
80.2002		-0.416095	0.310336	-0.151068
80.2998		-0.407346	0.320399	-0.137332
80.4004		-0.394326	0.329674	-0.121534
80.5		-0.377256	0.337611	-0.103972
80.5996		-0.356504	0.343752	-0.0849706
80.7002		-0.332482	0.347699	-0.0647977
80.7998		-0.305741	0.349155	-0.0437396
80.9004		-0.276879	0.34791	-0.0220351
81		-0.246609	0.343869	3.21115e-05
81.0996		-0.21564	0.337087	0.022225
81.2002		-0.184706	0.327718	0.0442506
81.2998		-0.154537	0.31602	0.0658586
81.4004		-0.125832	0.302332	0.0867331
81.5		-0.0992436	0.287091	0.10659
81.5996		-0.0753369	0.270762	0.125092
81.7002		-0.054639	0.253835	0.141948
81.7998		-0.0375012	0.23679	0.156836
81.9004		-0.0241727	0.22008	0.169492
82		-0.0147376	0.204109	0.179643
82.0996		-0.0091923	0.189197	0.187122
82.2002		-0.00736744	0.175604	0.191829
82.2998		-0.00900236	0.163503	0.193751
82.4004		-0.0137147	0.153004	0.192932
82.5		-0.0210383	0.14414	0.189518
82.5996		-0.0304647	0.136924	0.183711
82.7002		-0.0414318	0.131285	0.17578
82.7998		-0.0534152	0.127139	0.166054
82.9004		-0.0658588	0.124353	0.154877
83		-0.0782814	0.122842	0.142642
83.0996		-0.0902137	0.122494	0.129698
83.2002		-0.10129	0.123249	0.116405
83.2998		-0.11123	0.125011	0.103042
83.4004		-0.119829	0.127767	0.0899024
83.5		-0.126995	0.131477	0.0771678
83.5996		-0.132687	0.136168	0.0650091
83.7002		-0.136961	0.141807	0.0534989
83.7998		-0.139924	0.14841	0.0426965
83.9004		-0.141744	0.15594	0.0325888
84		-0.142575	0.164371	0.0231562
84.0996		-0.142558	0.173599	0.0143417
84.2002		-0.141843	0.183543	0.00609617
84.2998		-0.140538	0.194053	-0.00162089
84.4004		-0.138727	0.205001	-0.00887822
84.5		-0.136391	0.216199	-0.0156781
84.5996		-0.133493	0.227477	-0.0220416
84.7002		-0.129886	0.238622	-0.0279244
84.7998		-0.125417	0.249433	-0.0333004
84.9004		-0.119882	0.25969	-0.0380785
85		-0.113062	0.269223	-0.0422008
85.0996		-0.104703	0.277847	-0.0455852
85.2002		-0.0945336	0.285402	-0.0481939
85.2998		-0.0823354	0.291734	-0.0499521
85.4004		-0.0679203	0.296707	-0.0508184
85.5		-0.051148	0.3002	-0.0507638
85.5996		-0.0319295	0.302088	-0.0498127
85.7002		-0.010239	0.302244	-0.0480047
85.7998		0.0138657	0.30054	-0.0454078
85.9004		0.0402581	0.29684	-0.0421019
86		0.0687039	0.29101	-0.0382041
86.0996		0.0989418	0.282922	-0.0338511
86.2002		0.130624	0.272481	-0.0291862
86.2998		0.163423	0.259594	-0.0243502
86.4004		0.196918	0.244205	-0.0194871
86.5		0.230686	0.226281	-0.0146935
86.5996		0.264231	0.205879	-0.0100523
86.7002		0.297111	0.1831	-0.00560814
86.7998		0.328895	0.158145	-0.00139268
86.9004		0.359197	0.131251	0.00262705
87		0.387621	0.102763	0.00651057
87.0996		0.413808	0.0730306	0.0103858
87.2002		0.437408	0.0424799	0.0143935
87.2998		0.458147	0.0115537	0.018711
87.4004		0.475774	-0.0192402	0.0235193
87.5		0.490105	-0.0494331	0.0289997
87.5996		0.50098	-0.0785473	0.0353216
87.7002		0.508304	-0.106205	0.0426199
87.7998		0.511985	-0.132047	0.0510066
87.9004		0.512012	-0.155807	0.060534
88		0.508398	-0.177283	0.0712198
88.0996		0.501235	-0.196399	0.0829724
88.2002		0.490635	-0.213169	0.0956501
88.2998		0.476778	-0.227652	0.109011
88.4004		0.459878	-0.239983	0.122812
88.5		0.440195	-0.250346	0.13673
88.5996		0.418011	-0.25901	0.150435
88.7002		0.393678	-0.266242	0.163516
88.7998		0.367592	-0.272311	0.175599
88.9004		0.340193	-0.277451	0.186296
89		0.311932	-0.281879	0.195303
89.0996		0.283275	-0.285739	0.202305
89.2002		0.254655	-0.289121	0.207062
89.2998		0.226536	-0.292049	0.209371
89.4004		0.199364	-0.294488	0.20914
89.5		0.173571	-0.29632	0.206328
89.5996		0.149544	-0.297377	0.200986
89.7002		0.127641	-0.297441	0.193225
89.7998		0.108144	-0.296281	0.183251
89.9004		0.0912812	-0.293673	0.17132
90		0.0772159	-0.289406	0.157751
90.0996		0.0660459	-0.283289	0.142875
90.2002		0.0577888	-0.275172	0.127058
90.2998		0.0523826	-0.265015	0.110683
90.4004		0.0497186	-0.252841	0.0941567
90.5		0.0496191	-0.238799	0.077853
90.5996		0.05188	-0.223102	0.0621481
90.7002		0.0562005	-0.206058	0.0473911
90.7998		0.0622713	-0.188026	0.033903
90.9004		0.0697086	-0.169463	0.0219653
91		0.0781361	-0.150886	0.0118097
91.0996		0.0871121	-0.132797	0.0036224
91.2002		0.0962188	-0.115711	-0.00247315
91.2998		0.105019	-0.1001	-0.00639535
91.4004		0.113074	-0.0864408	-0.00812081
91.5		0.119974	-0.0750771	-0.00767473
91.5996		0.125315	-0.0662801	-0.00512599
91.7002		0.128756	-0.0601837	-0.000590552
91.7998		0.129975	-0.0568645	0.00578558
91.9004		0.128743	-0.0562413	0.0138387
92		0.12482	-0.0581622	0.0233958
92.0996		0.118088	-0.0623359	0.034263
92.2002		0.108508	-0.068438	0.046262
92.2998		0.0961634	-0.0760586	0.0591879
92.4004		0.0812317	-0.0847824	0.0728894
92.5		0.0639649	-0.0941463	0.0871889
92.5996		0.0447263	-0.103715	0.101974
92.7002		0.0239177	-0.113082	0.117109
92.7998		0.00205554	-0.121888	0.132519
92.9004		-0.020324	-0.129828	0.148109
93		-0.0426211	-0.136673	0.163859
93.0996		-0.0642573	-0.142282	0.179706
93.2002		-0.0846716	-0.146589	0.195633
93.2998		-0.10334	-0.149617	0.211572
93.4004		-0.119795	-0.151436	0.227479
93.5		-0.133677	-0.152199	0.243289
93.5996		-0.144718	-0.152097	0.258976
93.7002		-0.152746	-0.151375	0.274493
93.7998		-0.157703	-0.150278	0.289773
93.9004		-0.159648	-0.149065	0.304724
94		-0.15875	-0.147981	0.319227
94.0996		-0.155279	-0.147263	0.333169
94.2002		-0.14961	-0.147094	0.346412
94.2998		-0.142193	-0.14761	0.358826
94.4004		-0.133525	-0.148873	0.370235
94.5		-0.12411	-0.150903	0.380461
94.5996		-0.114461	-0.153638	0.389286
94.7002		-0.105107	-0.156966	0.396524
94.7998		-0.0965306	-0.160697	0.401979
94.9004		-0.0891954	-0.164588	0.405499
95		-0.0834798	-0.168375	0.406906
95.0996		-0.0797366	-0.171753	0.406056
95.2002		-0.078219	-0.174393	0.402813
95.2998		-0.0791407	-0.175992	0.397095
95.4004		-0.0825977	-0.176271	0.388867
95.5		-0.0886265	-0.174982	0.378162
95.5996		-0.0972008	-0.171909	0.365076
95.7002		-0.108197	-0.16688	0.349759
95.7998		-0.121442	-0.159782	0.33241
95.9004		-0.136684	-0.150564	0.313276
96		-0.153637	-0.13922	0.292679
96.0996		-0.171988	-0.125777	0.27096
96.2002		-0.191356	-0.110282	0.248504
96.2998		-0.211355	-0.092859	0.225707
96.4004		-0.231563	-0.0736338	0.202971
96.5		-0.251583	-0.0527479	0.180673
96.5996		-0.270975	-0.0303197	0.159156
96.7002		-0.289365	-0.0065418	0.138732
96.7998		-0.306372	0.0183933	0.119648
96.9004		-0.321693	0.0442512	0.102093
97		-0.335013	0.0708134	0.0861647
97.0996		-0.346132	0.0977727	0.0719329
97.2002		-0.354871	0.124831	0.0593639
97.2998		-0.36118	0.151625	0.0483693
97.4004		-0.365037	0.177791	0.0387625
97.5		-0.366539	0.202888	0.0303174
97.5996		-0.365835	0.226464	0.0227545
97.7002		-0.363172	0.248035	0.0157509
97.7998		-0.358845	0.267152	0.0089459
97.9004		-0.353216	0.283382	0.00195459
98		-0.346665	0.296314	-0.00557805
98.0996		-0.339617	0.305594	-0.0139986
98.2002		-0.332501	0.310941	-0.0235941
98.2998		-0.32575	0.312191	-0.0346258
98.4004		-0.319795	0.309246	-0.0472656
98.5		-0.315013	0.302168	-0.0616399
98.5996		-0.311728	0.291071	-0.0777889
98.7002		-0.310198	0.27623	-0.095692
98.7998		-0.310611	0.257974	-0.11522
98.9004		-0.313085	0.236786	-0.136178
99		-0.317644	0.213173	-0.158287
99.0996		-0.324226	0.187716	-0.181219
99.2002		-0.332666	0.161016	-0.204576
99.2998		-0.342762	0.13372	-0.227951
99.4004		-0.354217	0.106473	-0.25093
99.5		-0.36672	0.079914	-0.273077
99.5996		-0.379882	0.0546305	-0.29398
99.7002		-0.393331	0.0311754	-0.313252
99.7998		-0.406656	0.010025	-0.330609
99.9004		-0.4195	-0.00841039	-0.345819
100		-0.431472	-0.0238215	-0.358729
100.1		-0.442302	-0.0359758	-0.369253
100.2		-0.451742	-0.0447026	-0.377418
100.3		-0.459638	-0.0499158	-0.383319
100.4		-0.465874	-0.0516326	-0.387151
100.5		-0.470427	-0.0499626	-0.389163
100.6		-0.473333	-0.0450991	-0.389681
100.7		-0.474693	-0.0373096	-0.389038
100.8		-0.474693	-0.0269233	-0.387595
100.9		-0.473534	-0.0143223	-0.385691
101		-0.471488	9.1272e-05	-0.383663
101.1		-0.468798	0.0158838	-0.381794
101.2		-0.465728	0.0326262	-0.380308
101.3		-0.462464	0.0498926	-0.379352
101.4		-0.459203	0.0672785	-0.378981
101.5		-0.456039	0.0844331	-0.379199
101.6		-0.45307	0.101045	-0.379944
101.7		-0.450304	0.116871	-0.381081
101.8		-0.447699	0.131697	-0.3824
101.9		-0.445136	0.145413	-0.383664
102		-0.442451	0.15794	-0.384593
102.1		-0.439465	0.169295	-0.38494
102.2		-0.435948	0.179494	-0.384456
102.3		-0.431699	0.188648	-0.382937
102.4		-0.42648	0.196852	-0.380177
102.5		-0.420153	0.204264	-0.37607
102.6		-0.412592	0.21098	-0.370525
102.7		-0.403776	0.217169	-0.363549
102.8		-0.393741	0.22294	-0.355143
102.9		-0.382601	0.228426	-0.345401
103		-0.370546	0.233697	-0.334385
103.1		-0.357825	0.238826	-0.32222
103.2		-0.34476	0.243817	-0.308978
103.3		-0.331701	0.248726	-0.294786
103.4		-0.319075	0.25354	-0.279725
103.5		-0.307259	0.258273	-0.263884
103.6		-0.29662	0.262877	-0.24731
103.7		-0.287475	0.267331	-0.230024
103.8		-0.280079	0.271552	-0.212024
103.9		-0.274626	0.275512	-0.193285
104		-0.271209	0.279134	-0.17381
104.1		-0.269823	0.282362	-0.153585
104.2		-0.270353	0.285092	-0.132659
104.3		-0.272608	0.287256	-0.111044
104.4		-0.276265	0.288726	-0.0888213
104.5		-0.280951	0.289406	-0.0660564
104.6		-0.286222	0.28916	-0.0429039
104.7		-0.291604	0.287917	-0.0195234
104.8		-0.2966	0.285543	0.00387864
104.9		-0.300685	0.281933	0.0270861
105		-0.303411	0.27693	0.0498576
105.1		-0.304338	0.270446	0.0719423
105.2		-0.303121	0.262376	0.0931155
105.3		-0.299439	0.252669	0.11313
105.4		-0.293093	0.241255	0.131783
105.5		-0.28397	0.22814	0.148864
105.6		-0.272044	0.213351	0.164224
105.7		-0.257401	0.196992	0.177739
105.8		-0.240214	0.179171	0.189364
105.9		-0.220737	0.160071	0.199082
106		-0.199279	0.139893	0.20693
106.1		-0.176205	0.118888	0.212995
106.2		-0.151902	0.0973281	0.217402
106.3		-0.12679	0.0755533	0.220363
106.4		-0.101326	0.0539218	0.222073
106.5		-0.0759605	0.0328227	0.222805
106.6		-0.0511514	0.0126435	0.222826
106.7		-0.0272988	-0.00622715	0.222461
106.8		-0.00478792	-0.0234121	0.221962
106.9		0.0160464	-0.0385471	0.221606
107		0.0348675	-0.0512901	0.221603
107.1		0.0513933	-0.0613171	0.22217
107.2		0.0653659	-0.0683413	0.223427
107.3		0.0766039	-0.0721062	0.225472
107.4		0.0849435	-0.0724335	0.228282
107.5		0.0903165	-0.0691943	0.231789
107.6		0.0926948	-0.0623274	0.235841
107.7		0.092138	-0.0518139	0.240251
107.8		0.0887519	-0.0377038	0.244768
107.9		0.0827232	-0.0201126	0.249115
108		0.0742799	0.000747007	0.252951
108.1		0.0637391	0.0245937	0.255947
108.2		0.0514487	0.0510742	0.257785
108.3		0.0378184	0.0797842	0.258227
108.4		0.0232775	0.110273	0.257056
108.5		0.0083	0.142026	0.254143
108.6		-0.00663965	0.174496	0.24942
108.7		-0.0210491	0.2071	0.242931
108.8		-0.0344812	0.239263	0.23481
108.9		-0.0465536	0.270406	0.225283
109		-0.0569446	0.299981	0.214664
109.1		-0.0654219	0.327449	0.203362
109.2		-0.0718597	0.352304	0.191855
109.3		-0.0762433	0.374071	0.180633
109.4		-0.078635	0.392368	0.170187
109.5		-0.0791872	0.406869	0.160995
109.6		-0.0781358	0.417336	0.153528
109.7		-0.0757861	0.42357	0.148175
109.8		-0.0725156	0.425484	0.145257
109.9		-0.0687073	0.423042	0.144991
110		-0.064766	0.416334	0.147494
110.1		-0.0610409	0.405478	0.152748
110.2		-0.0578584	0.390681	0.160632
110.3		-0.05546	0.372166	0.170894
110.4		-0.0540458	0.350228	0.183184
110.5		-0.053678	0.325192	0.197079
110.6		-0.0543528	0.297436	0.212092
110.7		-0.0559485	0.267362	0.227689
110.8		-0.0582836	0.235399	0.243322
110.9		-0.0611312	0.202013	0.258477
111		-0.0642183	0.167691	0.272681
111.1		-0.0672589	0.132936	0.285521
111.2		-0.0699315	0.0982285	0.296657
111.3		-0.0719629	0.0640401	0.305838
111.4		-0.0730835	0.0308553	0.312907
111.5		-0.0731337	-0.000880982	0.317804
111.6		-0.0719735	-0.0307175	0.320582
111.7		-0.0695669	-0.0582559	0.321357
111.8		-0.0659147	-0.0831179	0.32032
111.9		-0.0611155	-0.105045	0.317708
112		-0.0553076	-0.123798	0.313805
112.1		-0.0486853	-0.139244	0.308936
112.2		-0.0415011	-0.151274	0.303421
112.3		-0.0339907	-0.159916	0.29755
112.4		-0.02643	-0.165232	0.291581
112.5		-0.0190416	-0.167416	0.285748
112.6		-0.0120515	-0.166678	0.280256
112.7		-0.00559821	-0.163365	0.275264
112.8		0.000184282	-0.157808	0.270865
112.9		0.00522791	-0.150431	0.267121
113		0.0095079	-0.141611	0.264054
113.1		0.013062	-0.131771	0.261705
113.2		0.0159779	-0.121274	0.260052
113.3		0.0183561	-0.110495	0.259092
113.4		0.0203278	-0.0997129	0.25876
113.5		0.0220598	-0.0892191	0.259045
113.6		0.0237251	-0.0792057	0.259884
113.7		0.0254805	-0.0698534	0.261262
113.8		0.0274644	-0.061247	0.263122
113.9		0.0297731	-0.0534708	0.26543
114		0.0324525	-0.046515	0.268082
114.1		0.0354946	-0.0403659	0.271003
114.2		0.0388445	-0.0349414	0.274078
114.3		0.0423963	-0.0302103	0.277189
114.4		0.0459868	-0.0260977	0.280201
114.5		0.0494091	-0.0225778	0.282941
114.6		0.0524079	-0.0195771	0.285238
114.7		0.0547225	-0.0170714	0.286883
114.8		0.0560273	-0.0150221	0.287696
114.9		0.0560193	-0.0134626	0.287448
115		0.0544078	-0.0124117	0.285944
115.1		0.0509289	-0.0119436	0.282965
115.2		0.045375	-0.0120909	0.278368
115.3		0.0375676	-0.0129416	0.271975
115.4		0.0274186	-0.0145405	0.2637
115.5		0.0148693	-0.0169812	0.253457
115.6		-2.06448e-05	-0.0202906	0.241245
115.7		-0.0171492	-0.0245244	0.227067
115.8		-0.0363309	-0.0296721	0.211004
115.9		-0.057313	-0.0357302	0.193183
116		-0.0797871	-0.0425986	0.173817
116.1		-0.103348	-0.0501796	0.153174
116.2		-0.127586	-0.0583147	0.131557
116.3		-0.152052	-0.066839	0.109309
116.4		-0.17633	-0.0755074	0.0868201
116.5		-0.199985	-0.0840452	0.0645396
116.6		-0.222613	-0.092139	0.0429156
116.7		-0.243811	-0.0994672	0.0223815
116.8		-0.263216	-0.105711	0.0033569
116.9		-0.280489	-0.110528	-0.0137532
117		-0.295345	-0.113592	-0.0286087
117.1		-0.307553	-0.114563	-0.040934
117.2		-0.316934	-0.11314	-0.0505415
117.3		-0.323376	-0.109034	-0.0573209
117.4		-0.326834	-0.102061	-0.0612768
117.5		-0.327321	-0.0920733	-0.0624966
117.6		-0.324894	-0.0790275	-0.0611835
117.7		-0.319674	-0.0628974	-0.0576182
117.8		-0.311827	-0.0437978	-0.0521713
117.9		-0.30158	-0.0218954	-0.0452602
118		-0.289184	0.00251416	-0.0373606
118.1		-0.274935	0.029109	-0.0289203
118.2		-0.259154	0.0574681	-0.020421
118.3		-0.242169	0.0871372	-0.012292
118.4		-0.224313	0.117562	-0.00497361
118.5		-0.205906	0.148144	0.00119789
118.6		-0.18726	0.178246	0.00591844
118.7		-0.16865	0.207198	0.00900438
118.8		-0.150351	0.234337	0.010307
118.9		-0.132546	0.258984	0.00977426
119		-0.115388	0.280528	0.00741149
119.1		-0.0989713	0.298394	0.00331459
119.2		-0.0833915	0.312124	-0.00238224
119.3		-0.068687	0.32131	-0.00948814
119.4		-0.0548708	0.325696	-0.0177826
119.5		-0.0419023	0.325145	-0.0270245
119.6		-0.0297281	0.319672	-0.0369503
119.7		-0.0182994	0.309428	-0.0472749
119.8		-0.00759149	0.294728	-0.0577107
119.9		0.00240354	0.276055	-0.0679889
120		0.0116866	0.25402	-0.0778516
120.1		0.020196	0.229381	-0.0871026
120.2		0.0278867	0.202956	-0.0955367
120.3		0.034625	0.175708	-0.103006
120.4		0.040267	0.148596	-0.109376
120.5		0.0445928	0.122639	-0.114595
120.6		0.0474024	0.0987663	-0.118648
120.7		0.0484289	0.0779214	-0.121602
120.8		0.0474402	0.0609096	-0.123537
120.9		0.0441702	0.0484692	-0.124613
121		0.0383775	0.0411589	-0.124988
121.1		0.0298284	0.0393799	-0.124875
121.2		0.01832	0.0433524	-0.124458
121.3		0.0037205	0.0531318	-0.123958
121.4		-0.014057	0.0686174	-0.123533
121.5		-0.0350192	0.0895397	-0.123368
121.6		-0.0591346	0.115472	-0.123576
121.7		-0.0862449	0.145833	-0.12427
121.8		-0.116155	0.179928	-0.12549
121.9		-0.148547	0.216983	-0.127237
122		-0.183078	0.256163	-0.129432
122.1		-0.219288	0.296597	-0.132001
122.2		-0.256697	0.33739	-0.134819
122.3		-0.294764	0.377688	-0.13775
122.4		-0.332911	0.416652	-0.140634
122.5		-0.370583	0.453517	-0.143316
122.6		-0.407191	0.487545	-0.145665
122.7		-0.442216	0.518131	-0.147554
122.8		-0.475093	0.544761	-0.148886
122.9		-0.505359	0.567081	-0.149562
123		-0.532573	0.584831	-0.149546
123.1		-0.556371	0.597911	-0.148789
123.2		-0.576444	0.606299	-0.147315
123.3		-0.592537	0.610143	-0.145111
123.4		-0.604488	0.609658	-0.14223
123.5		-0.612157	0.605216	-0.138685
123.6		-0.615512	0.597221	-0.13454
123.7		-0.614512	0.586176	-0.129814
123.8		-0.609199	0.572578	-0.124561
123.9		-0.599647	0.557002	-0.118836
124		-0.585971	0.539961	-0.112705
124.1		-0.568345	0.521971	-0.106229
124.2		-0.546927	0.503471	-0.0994669
124.3		-0.521943	0.484882	-0.0924907
124.4		-0.493594	0.466525	-0.0853678
124.5		-0.462175	0.448688	-0.0782057
124.6		-0.427985	0.431553	-0.0710815
124.7		-0.391387	0.415283	-0.0641
124.8		-0.352775	0.399942	-0.0573573
124.9		-0.312563	0.385571	-0.0509814
125		-0.27122	0.372152	-0.0450483
125.1		-0.229232	0.359669	-0.0396391
125.2		-0.187125	0.34807	-0.0347795
125.3		-0.145413	0.337334	-0.0304842
125.4		-0.104612	0.327443	-0.0267324
125.5		-0.0652174	0.318414	-0.0234905
125.6		-0.0276656	0.310261	-0.0206871
125.7		0.00760557	0.303005	-0.0181923
125.8		0.0402674	0.296658	-0.0158522
125.9		0.0700283	0.291243	-0.0134553
126		0.0967266	0.286755	-0.010815
126.1		0.120257	0.283181	-0.007714
126.2		0.140628	0.280466	-0.00396144
126.3		0.157913	0.27852	0.000639702
126.4		0.172293	0.277204	0.00626072
126.5		0.184011	0.276365	0.0130189
126.6		0.193366	0.275795	0.0209745
126.7		0.200704	0.275284	0.0301167
126.8		0.206384	0.274584	0.0403969
126.9		0.210751	0.273459	0.0517145
127		0.214089	0.271633	0.0639121
127.1		0.216686	0.268886	0.0767628
127.2		0.218755	0.264992	0.0900239
127.3		0.220446	0.25981	0.103421
127.4		0.221789	0.253193	0.116687
127.5		0.22274	0.245095	0.129547
127.6		0.223157	0.23551	0.141733
127.7		0.222869	0.224527	0.153004
127.8		0.221647	0.212247	0.163177
127.9		0.21923	0.198819	0.172112
128		0.215319	0.184415	0.179732
128.1		0.20964	0.169259	0.186032
128.2		0.201914	0.15361	0.191031
128.3		0.19194	0.137731	0.194832
128.4		0.179575	0.121899	0.197555
128.5		0.164797	0.106371	0.199377
128.6		0.147651	0.0914247	0.200458
128.7		0.128301	0.077259	0.201019
128.8		0.106983	0.0640623	0.201239
128.9		0.0840437	0.0519509	0.201328
129		0.0599097	0.0410413	0.20143
129.1		0.0350921	0.0313817	0.201698
129.2		0.0101252	0.0229773	0.202212
129.3		-0.0144327	0.0157785	0.203025
129.4		-0.0380365	0.00971106	0.204124
129.5		-0.0601667	0.00465929	0.205493
129.6		-0.0803365	0.000515371	0.207065
129.7		-0.0981041	-0.00284759	0.208752
129.8		-0.113118	-0.00555763	0.210419
129.9		-0.125123	-0.00779282	0.211921
130		-0.13397	-0.00969752	0.213088
130.1		-0.13962	-0.011425	0.213766
130.2		-0.142117	-0.0130642	0.213805
130.3		-0.141564	-0.0146905	0.21305
130.4		-0.138165	-0.0163482	0.211372
130.5		-0.132165	-0.0180663	0.208676
130.6		-0.123864	-0.0198364	0.204912
130.7		-0.113575	-0.021642	0.20007
130.8		-0.101646	-0.0234632	0.194176
130.9		-0.0884118	-0.0252444	0.187287
131		-0.0741794	-0.0269228	0.179491
131.1		-0.059248	-0.0284106	0.170896
131.2		-0.0438689	-0.0296349	0.161678
131.3		-0.0282795	-0.0305163	0.152044
131.4		-0.0126338	-0.0309915	0.142227
131.5		0.00289919	-0.0310363	0.132459
131.6		0.0182309	-0.0306218	0.122985
131.7		0.0332586	-0.0297464	0.114078
131.8		0.0479436	-0.0284276	0.106025
131.9		0.0622473	-0.0267621	0.0991193
132		0.0761403	-0.0248177	0.093626
132.1		0.0896024	-0.0227212	0.0898168
132.2		0.102584	-0.0206121	0.0879219
132.3		0.115068	-0.0187029	0.0881639
132.4		0.126992	-0.0171875	0.0906909
132.5		0.138328	-0.0163151	0.0956399
132.6		0.148965	-0.0162838	0.10306
132.7		0.158817	-0.01733	0.112996
132.8		0.167756	-0.0195928	0.125358
132.9		0.175635	-0.0232156	0.140041
133		0.182261	-0.0282548	0.156808
133.1		0.187424	-0.0347576	0.175412
133.2		0.190897	-0.0426597	0.195511
133.3		0.192397	-0.0518627	0.216755
133.4		0.191614	-0.0621535	0.238714
133.5		0.18821	-0.0732862	0.26094
133.6		0.181844	-0.0849081	0.282941
133.7		0.17219	-0.096659	0.304235
133.8		0.158926	-0.108116	0.324334
133.9		0.14177	-0.118917	0.342768
134		0.120489	-0.128679	0.359105
134.1		0.0949345	-0.137095	0.372936
134.2		0.0650304	-0.143885	0.383928
134.3		0.0308207	-0.148891	0.391788
134.4		-0.00756301	-0.152027	0.396303
134.5		-0.0498438	-0.153374	0.397303
134.6		-0.0956378	-0.153076	0.394721
134.7		-0.144433	-0.151414	0.388546
134.8		-0.195607	-0.14871	0.378863
134.9		-0.248448	-0.14541	0.36579
135		-0.302144	-0.141974	0.34956
135.1		-0.355876	-0.138935	0.330444
135.2		-0.408755	-0.136778	0.308793
135.3		-0.459944	-0.135998	0.284978
135.4		-0.508594	-0.13697	0.259429
135.5		-0.553975	-0.140036	0.232607
135.6		-0.59543	-0.145386	0.205002
135.7		-0.632416	-0.153122	0.177101
135.8		-0.66451	-0.163156	0.149368
135.9		-0.691405	-0.175306	0.122266
136		-0.712955	-0.189216	0.0962013
136.1		-0.729124	-0.204478	0.0715502
136.2		-0.739998	-0.22057	0.0486134
136.3		-0.745754	-0.236926	0.027654
136.4		-0.746688	-0.252896	0.00886869
136.5		-0.743185	-0.267857	-0.00759983
136.6		-0.735691	-0.281184	-0.0216764
136.7		-0.724679	-0.29229	-0.0333601
136.8		-0.710641	-0.300626	-0.0426958
136.9		-0.694106	-0.305751	-0.049788
137		-0.675616	-0.307329	-0.0547599
137.1		-0.655717	-0.305121	-0.0578045
137.2		-0.63491	-0.29901	-0.0591148
137.3		-0.61368	-0.288991	-0.0589136
137.4		-0.592454	-0.275189	-0.0574193
137.5		-0.571632	-0.257786	-0.0548714
137.6		-0.551547	-0.23709	-0.0515073
137.7		-0.53248	-0.213444	-0.0475704
137.8		-0.514631	-0.18728	-0.0432873
137.9		-0.498126	-0.158979	-0.0388681
138		-0.483007	-0.129002	-0.0345226
138.1		-0.469223	-0.0977619	-0.0304434
138.2		-0.456649	-0.06571	-0.0268099
138.3		-0.445095	-0.0332042	-0.0237461
138.4		-0.43431	-0.000562954	-0.0213812
138.5		-0.423982	0.0319871	-0.0197927
138.6		-0.413777	0.0642681	-0.0190937
138.7		-0.403347	0.0961658	-0.0193274
138.8		-0.392354	0.127642	-0.0205376
138.9		-0.380475	0.158697	-0.0227119
139		-0.36746	0.189359	-0.0258262
139.1		-0.353116	0.219648	-0.0298201
139.2		-0.337347	0.249622	-0.0346545
139.3		-0.320132	0.2793	-0.0402613
139.4		-0.301575	0.308704	-0.0465676
139.5		-0.28186	0.337781	-0.0535237
139.6		-0.261283	0.366427	-0.0610969
139.7		-0.240226	0.394462	-0.069274
139.8		-0.219148	0.421659	-0.0780622
139.9		-0.198591	0.447738	-0.0875061
140		-0.179101	0.472342	-0.0976531
140.1		-0.161278	0.495114	-0.108592
140.2		-0.145699	0.515648	-0.120409
140.3		-0.132958	0.533564	-0.133239
140.4		-0.123534	0.548455	-0.147157
140.5		-0.117882	0.560021	-0.162253
140.6		-0.116344	0.567949	-0.178577
140.7		-0.119206	0.572054	-0.196192
140.8		-0.126601	0.572171	-0.215065
140.9		-0.13858	0.568281	-0.235138
141		-0.155018	0.560418	-0.256227
141.1		-0.175666	0.548753	-0.278126
141.2		-0.200139	0.533522	-0.300554
141.3		-0.227923	0.515041	-0.323203
141.4		-0.258392	0.493688	-0.345683
141.5		-0.290819	0.469876	-0.367596
141.6		-0.324439	0.444061	-0.388522
141.7		-0.358407	0.416692	-0.408082
141.8		-0.391893	0.388243	-0.42591
141.9		-0.424028	0.359194	-0.441691
142		-0.454035	0.330006	-0.455172
142.1		-0.48119	0.301086	-0.466175
142.2		-0.504876	0.272827	-0.47462
142.3		-0.524597	0.245558	-0.48049
142.4		-0.539977	0.219577	-0.483882
142.5		-0.55082	0.195134	-0.484947
142.6		-0.557036	0.172442	-0.483942
142.7		-0.558739	0.151647	-0.48113
142.8		-0.556139	0.132837	-0.476866
142.9		-0.549613	0.116061	-0.471488
143		-0.539588	0.101323	-0.465394
143.1		-0.526585	0.08859	-0.458905
143.2		-0.511171	0.0777955	-0.452355
143.3		-0.493906	0.0688603	-0.445969
143.4		-0.475365	0.061652	-0.439983
143.5		-0.456055	0.0560062	-0.43454
143.6		-0.436453	0.0517248	-0.429746
143.7		-0.416946	0.0486193	-0.425598
143.8		-0.397874	0.0464722	-0.422025
143.9		-0.37948	0.0450743	-0.418891
144		-0.361915	0.044199	-0.416018
144.1		-0.345274	0.0436419	-0.413198
144.2		-0.329589	0.0431995	-0.410162
144.3		-0.314866	0.0426767	-0.406653
144.4		-0.301036	0.0418716	-0.402354
144.5		-0.288057	0.0406022	-0.396986
144.6		-0.275845	0.0387117	-0.390255
144.7		-0.264352	0.0360689	-0.381921
144.8		-0.253545	0.0325621	-0.371761
144.9		-0.243421	0.0281157	-0.359617
145		-0.234001	0.0226941	-0.345357
145.1		-0.225289	0.0162893	-0.328886
145.2		-0.217329	0.00894152	-0.310152
145.3		-0.210121	0.000730573	-0.289151
145.4		-0.203679	-0.00822348	-0.265959
145.5		-0.197968	-0.0177841	-0.240663
145.6		-0.192908	-0.0277593	-0.213403
145.7		-0.188401	-0.0379347	-0.184315
145.8		-0.184276	-0.0480378	-0.153593
145.9		-0.18033	-0.0578018	-0.121418
146		-0.17629	-0.0669021	-0.0880214
146.1		-0.171893	-0.0750361	-0.0536264
146.2		-0.166831	-0.0818841	-0.018508
146.3		-0.1608	-0.0871911	0.0170558
146.4		-0.153493	-0.0907089	0.0527928
146.5		-0.144646	-0.0922459	0.0884003
146.6		-0.134044	-0.0916376	0.123619
146.7		-0.121529	-0.0888232	0.158117
146.8		-0.107041	-0.0837891	0.191608
146.9		-0.0906082	-0.076627	0.223762
147		-0.0723595	-0.0674718	0.254281
147.1		-0.0524931	-0.0565587	0.282809
147.2		-0.0312929	-0.0441754	0.309055
147.3		-0.00912425	-0.0306819	0.332707
147.4		0.0135731	-0.0164707	0.353539
147.5		0.0362858	-0.00198785	0.371337
147.6		0.0584582	0.0123368	0.385964
147.7		0.0795149	0.0260398	0.397288
147.8		0.0988905	0.0386979	0.405255
147.9		0.116033	0.0498966	0.409864
148		0.130417	0.0592796	0.411187
148.1		0.141583	0.0665175	0.409354
148.2		0.149128	0.0713929	0.404549
148.3		0.15274	0.0737337	0.397023
148.4		0.152181	0.0734257	0.387021
148.5		0.147323	0.0704109	0.374868
148.6		0.13816	0.0647183	0.36088
148.7		0.124805	0.0564328	0.345415
148.8		0.107489	0.0456859	0.3288
148.9		0.0865749	0.0326577	0.311373
149		0.062533	0.0175503	0.293398
149.1		0.0359266	0.0006048	0.275161
149.2		0.00743214	-0.0179387	0.256877
149.3		-0.0222006	-0.0377908	0.23876
149.4		-0.0521896	-0.0586748	0.220945
149.5		-0.0817563	-0.0802857	0.20357
149.6		-0.110086	-0.102365	0.186704
149.7		-0.136376	-0.124605	0.170416
149.8		-0.159924	-0.14675	0.154715
149.9		-0.180108	-0.168535	0.139619
150		-0.196441	-0.189755	0.125107
150.1		-0.208544	-0.210176	0.111165
150.2		-0.216211	-0.229627	0.0977619
150.3		-0.219377	-0.247911	0.0848945
150.4		-0.21816	-0.264863	0.0725826
150.5		-0.212813	-0.280336	0.060877
150.6		-0.203766	-0.294226	0.0498462
150.7		-0.191558	-0.306451	0.0395742
150.8		-0.176845	-0.316923	0.0301643
150.9		-0.160322	-0.325599	0.0217513
151		-0.142764	-0.332439	0.0144795
151.1		-0.124963	-0.337437	0.00849821
151.2		-0.107678	-0.340601	0.00394875
151.3		-0.0916216	-0.34197	0.000950491
151.4		-0.0773901	-0.341589	-0.000410736
151.5		-0.0655407	-0.339505	-7.61099e-05
151.6		-0.0564663	-0.335813	0.00194871
151.7		-0.0504856	-0.330616	0.00560491
151.8		-0.0477177	-0.32407	0.0107517
151.9		-0.0481733	-0.316317	0.0172285
152		-0.0517019	-0.307561	0.0247925
152.1		-0.0580276	-0.298012	0.0331727
152.2		-0.0667838	-0.287949	0.0420221
152.3		-0.0775061	-0.277634	0.0510121
152.4		-0.08969	-0.267378	0.0597384
152.5		-0.102749	-0.257479	0.0678468
152.6		-0.116106	-0.24827	0.0749639
152.7		-0.129147	-0.240068	0.080786
152.8		-0.14131	-0.233206	0.0850379
152.9		-0.152026	-0.227984	0.0875351
153		-0.160837	-0.224688	0.0881394
153.1		-0.167352	-0.223552	0.0867827
153.2		-0.17128	-0.224763	0.0834573
153.3		-0.172446	-0.228448	0.0782371
153.4		-0.170763	-0.234659	0.0712841
153.5		-0.166243	-0.243379	0.0628014
153.6		-0.15895	-0.254509	0.0530684
153.7		-0.149055	-0.267909	0.0423461
153.8		-0.136802	-0.283364	0.030954
153.9		-0.122529	-0.300603	0.0191902
154		-0.106633	-0.319294	0.00741197
154.1		-0.0895498	-0.339071	-0.00406486
154.2		-0.0717321	-0.359528	-0.0148958
154.3		-0.0536677	-0.380259	-0.0248241
154.4		-0.0358567	-0.40086	-0.0336197
154.5		-0.0187861	-0.420953	-0.0411111
154.6		-0.00294982	-0.440147	-0.0471507
154.7		0.0111925	-0.458076	-0.0516337
154.8		0.023205	-0.474409	-0.0544794
154.9		0.0327146	-0.488876	-0.0556832
155		0.0393883	-0.501214	-0.0552701
155.1		0.0429578	-0.511207	-0.0533077
155.2		0.0432198	-0.518656	-0.0499247
155.3		0.0400428	-0.523407	-0.0452944
155.4		0.0334224	-0.525322	-0.0396373
155.5		0.0234227	-0.524276	-0.033173
155.6		0.0102371	-0.520149	-0.0261719
155.7		-0.00588095	-0.512851	-0.0188783
155.8		-0.0245782	-0.502299	-0.0115729
155.9		-0.0453937	-0.488448	-0.00448713
156		-0.067835	-0.471262	0.00212413
156.1		-0.0912975	-0.450755	0.00806295
156.2		-0.115171	-0.426985	0.013154
156.3		-0.138797	-0.400067	0.0172785
156.4		-0.161557	-0.370134	0.0203703
156.5		-0.18284	-0.337418	0.0223746
156.6		-0.202127	-0.302217	0.0233168
156.7		-0.218952	-0.264913	0.0232441
156.8		-0.23297	-0.225916	0.0222599
156.9		-0.243922	-0.185718	0.0204374
157		-0.251717	-0.14482	0.0178902
157.1		-0.256344	-0.103792	0.0146879
157.2		-0.25795	-0.0632025	0.0109544
157.3		-0.25676	-0.0236406	0.00673038
157.4		-0.253105	0.0143459	0.00206708
157.5		-0.247376	0.0502578	-0.00307074
157.6		-0.240045	0.0836669	-0.0086962
157.7		-0.231602	0.114207	-0.0148823
157.8		-0.222546	0.14158	-0.0216656
157.9		-0.213333	0.165597	-0.0291485
158		-0.204411	0.186158	-0.0373758
158.1		-0.19616	0.203262	-0.0464164
158.2		-0.188886	0.216983	-0.056261
158.3		-0.182804	0.227502	-0.066896
158.4		-0.17805	0.235037	-0.0782291
158.5		-0.174659	0.239895	-0.0901175
158.6		-0.17261	0.242403	-0.102366
158.7		-0.171779	0.242942	-0.114708
158.8		-0.172033	0.241857	-0.12685
158.9		-0.173162	0.239518	-0.138462
159		-0.174984	0.236253	-0.149209
159.1		-0.177242	0.232388	-0.158751
159.2		-0.17975	0.228186	-0.166787
159.3		-0.182289	0.22389	-0.173021
159.4		-0.184748	0.219684	-0.177212
159.5		-0.187003	0.215726	-0.179173
159.6		-0.189011	0.212142	-0.178821
159.7		-0.190723	0.209006	-0.176137
159.8		-0.192181	0.206362	-0.171201
159.9		-0.193448	0.204231	-0.164189
160		-0.194659	0.20262	-0.155345
160.1		-0.19595	0.20154	-0.144949
160.2		-0.197462	0.200973	-0.133345
160.3		-0.199347	0.2009	-0.120929
160.4		-0.201729	0.20129	-0.108106
160.5		-0.204733	0.202111	-0.0952791
160.6		-0.208419	0.203321	-0.0828655
160.7		-0.212867	0.204882	-0.0712668
160.8		-0.218086	0.20676	-0.0608732
160.9		-0.224111	0.2089	-0.0520096
161		-0.230892	0.211269	-0.0449855
161.1		-0.238367	0.213808	-0.0400267
161.2		-0.246388	0.216501	-0.0373283
161.3		-0.25484	0.219291	-0.0370093
161.4		-0.263563	0.222149	-0.0391642
161.5		-0.272429	0.225026	-0.0438045
161.6		-0.281288	0.227906	-0.0509285
161.7		-0.289978	0.230781	-0.0604371
161.8		-0.298336	0.233668	-0.0722276
161.9		-0.30617	0.236594	-0.0861281
162		-0.313324	0.239617	-0.101976
162.1		-0.3196	0.242825	-0.119538
162.2		-0.324851	0.246305	-0.138588
162.3		-0.3289	0.250162	-0.158817
162.4		-0.331593	0.254497	-0.179932
162.5		-0.332778	0.259432	-0.201577
162.6		-0.332309	0.265047	-0.223406
162.7		-0.330062	0.271427	-0.245025
162.8		-0.325914	0.278594	-0.266073
162.9		-0.319791	0.286589	-0.286123
163		-0.311633	0.295363	-0.304767
163.1		-0.301405	0.304852	-0.321589
163.2		-0.289085	0.314901	-0.336212
163.3		-0.274713	0.325352	-0.348288
163.4		-0.258358	0.335979	-0.357524
163.5		-0.240153	0.346542	-0.363713
163.6		-0.220251	0.356727	-0.366676
163.7		-0.198839	0.366245	-0.366341
163.8		-0.176159	0.374757	-0.362685
163.9		-0.15251	0.381987	-0.355824
164		-0.128228	0.387653	-0.345897
164.1		-0.10367	0.391551	-0.333194
164.2		-0.0792058	0.393483	-0.318041
164.3		-0.0551952	0.393333	-0.300847
164.4		-0.0319804	0.390983	-0.282026
164.5		-0.00987843	0.386442	-0.262021
164.6		0.0108426	0.379771	-0.241281
164.7		0.0299207	0.371115	-0.220231
164.8		0.0471711	0.360613	-0.199262
164.9		0.0624556	0.348479	-0.178674
165		0.0757477	0.334909	-0.158739
165.1		0.0870577	0.320158	-0.139622
165.2		0.096508	0.304461	-0.121463
165.3		0.104265	0.288061	-0.104262
165.4		0.110576	0.271136	-0.0879889
165.5		0.115719	0.253858	-0.0725357
165.6		0.120024	0.23633	-0.0578075
165.7		0.123856	0.218659	-0.0436641
165.8		0.127558	0.200912	-0.0299846
165.9		0.131448	0.183159	-0.0166307
166		0.1358	0.165422	-0.00348629
166.1		0.140853	0.147706	0.0095159
166.2		0.146803	0.129994	0.0224096
166.3		0.153749	0.112288	0.0351701
166.4		0.161731	0.0945879	0.04776
166.5		0.170653	0.0769329	0.0600797
166.6		0.180405	0.0593704	0.0720643
166.7		0.190759	0.0420044	0.0835948
166.8		0.201475	0.0249489	0.0945881
166.9		0.212229	0.00836636	0.104928
167		0.222723	-0.00759125	0.114559
167.1		0.232614	-0.0227355	0.123442
167.2		0.241607	-0.0368709	0.131615
167.3		0.249375	-0.0497761	0.139107
167.4		0.255711	-0.0612459	0.146012
167.5		0.260416	-0.0710775	0.152421
167.6		0.263412	-0.079094	0.158499
167.7		0.264655	-0.085101	0.164383
167.8		0.264222	-0.0889269	0.170246
167.9		0.262242	-0.0904492	0.176203
168		0.258967	-0.0895588	0.182392
168.1		0.254703	-0.0862024	0.188859
168.2		0.249843	-0.080332	0.195664
168.3		0.244777	-0.0719959	0.202798
168.4		0.23995	-0.0612298	0.210263
168.5		0.235774	-0.0481483	0.217971
168.6		0.232683	-0.0328637	0.225844
168.7		0.231048	-0.0155782	0.233779
168.8		0.231196	0.00349459	0.241698
168.9		0.233369	0.0240658	0.249485
169		0.23771	0.0458003	0.257078
169.1		0.244256	0.0683132	0.264405
169.2		0.252937	0.0911771	0.271435
169.3		0.263587	0.113978	0.278174
169.4		0.275963	0.136285	0.284659
169.5		0.289716	0.157645	0.290964
169.6		0.304442	0.177598	0.297177
169.7		0.319681	0.195694	0.303418
169.8		0.334961	0.211499	0.309813
169.9		0.349797	0.224592	0.31651
170		0.363716	0.234623	0.323636
170.1		0.376304	0.241255	0.3313
170.2		0.387201	0.244259	0.339596
170.3		0.396124	0.243439	0.348607
170.4		0.402861	0.238712	0.358372
170.5		0.407302	0.230043	0.368897
170.6		0.409424	0.21752	0.380132
170.7		0.409292	0.20132	0.391982
170.8		0.407018	0.181748	0.404315
170.9		0.402808	0.159181	0.416977
171		0.396882	0.134074	0.429775
171.1		0.389504	0.10697	0.442466
171.2		0.38092	0.0784604	0.454758
171.3		0.371387	0.049214	0.466352
171.4		0.36113	0.0199118	0.476944
171.5		0.350347	-0.00874298	0.486246
171.6		0.33923	-0.0360636	0.493948
171.7		0.327917	-0.0614144	0.499756
171.8		0.316527	-0.0842152	0.503386
171.9		0.305135	-0.103982	0.504624
172		0.293804	-0.120301	0.503297
172.1		0.282578	-0.132867	0.499303
172.2		0.271494	-0.141475	0.492614
172.3		0.260581	-0.146067	0.483277
172.4		0.249889	-0.146649	0.471425
172.5		0.239479	-0.143395	0.457242
172.6		0.229439	-0.136541	0.441004
172.7		0.219918	-0.126456	0.423044
172.8		0.211029	-0.113524	0.403784
172.9		0.202938	-0.0982255	0.383638
173		0.195781	-0.0810282	0.363083
173.1		0.189762	-0.0624713	0.342553
173.2		0.185038	-0.0430491	0.322527
173.3		0.18177	-0.0232649	0.303414
173.4		0.180094	-0.00353308	0.285636
173.5		0.180107	0.0157174	0.26952
173.6		0.181887	0.0341528	0.255378
173.7		0.18542	0.0514432	0.243407
173.8		0.190691	0.0673915	0.233762
173.9		0.197608	0.0818103	0.226501
174		0.206039	0.0946451	0.221619
174.1		0.215742	0.105878	0.219065
174.2		0.226404	0.115618	0.218726
174.3		0.237673	0.123976	0.220426
174.4		0.249139	0.131183	0.223924
174.5		0.260359	0.137443	0.228963
174.6		0.270814	0.143044	0.235232
174.7		0.279983	0.148233	0.24244
174.8		0.287318	0.153299	0.250275
174.9		0.292314	0.158457	0.258449
175		0.294463	0.163954	0.266597
175.1		0.293317	0.16995	0.274392
175.2		0.288507	0.176616	0.28149
175.3		0.279731	0.183978	0.28762
175.4		0.266809	0.192038	0.292498
175.5		0.249649	0.200685	0.295906
175.6		0.228305	0.209802	0.297633
175.7		0.202961	0.219159	0.297539
175.8		0.173892	0.22852	0.295506
175.9		0.141541	0.237587	0.291476
176		0.106394	0.246057	0.285433
176.1		0.069072	0.253591	0.277412
176.2		0.0302162	0.259896	0.267486
176.3		-0.00944164	0.264704	0.255737
176.4		-0.0491914	0.267768	0.242283
176.5		-0.0883146	0.268884	0.227268
176.6		-0.126136	0.267886	0.21085
176.7		-0.162014	0.264696	0.193155
176.8		-0.195413	0.259283	0.174307
176.9		-0.225879	0.251699	0.154411
177		-0.253073	0.242067	0.133546
177.1		-0.276758	0.230591	0.111788
177.2		-0.296803	0.217479	0.089204
177.3		-0.313189	0.203022	0.0658251
177.4		-0.32601	0.187523	0.0416875
177.5		-0.33546	0.171354	0.0168467
177.6		-0.341784	0.154864	-0.00860713
177.7		-0.345306	0.13847	-0.0345815
177.8		-0.346388	0.122538	-0.0609118
177.9		-0.345416	0.107462	-0.0874271
178		-0.342792	0.0935522	-0.113844
178.1		-0.338882	0.0811528	-0.139863
178.2		-0.334006	0.0704947	-0.165098
178.3		-0.328454	0.0618222	-0.189186
178.4		-0.322434	0.055274	-0.21169
178.5		-0.316135	0.050951	-0.232218
178.6		-0.309663	0.0488611	-0.250361
178.7		-0.303078	0.048952	-0.265783
178.8		-0.296364	0.0511069	-0.278147
178.9		-0.28947	0.0551689	-0.287249
179		-0.282318	0.0609817	-0.292935
179.1		-0.274818	0.0683173	-0.295171
179.2		-0.266868	0.0769571	-0.293989
179.3		-0.258388	0.0866282	-0.289557
179.4		-0.249325	0.0971205	-0.282135
179.5		-0.239685	0.108212	-0.272067
179.6		-0.229519	0.119765	-0.259729
179.7		-0.218939	0.131657	-0.245549
179.8		-0.208106	0.143841	-0.229983
179.9		-0.197239	0.156288	-0.213508
180		-0.186635	0.169012	-0.196571
180.1		-0.176642	0.182047	-0.179581
180.2		-0.167597	0.195438	-0.162921
180.3		-0.159872	0.209266	-0.146906
180.4		-0.153819	0.223548	-0.131794
180.5		-0.149804	0.238316	-0.117758
180.6		-0.148096	0.253501	-0.104933
180.7		-0.148935	0.269022	-0.0933792
180.8		-0.152424	0.284695	-0.0831112
180.9		-0.158597	0.300308	-0.0740699
181		-0.167386	0.315535	-0.0661789
181.1		-0.178617	0.330035	-0.0593262
181.2		-0.191988	0.343407	-0.0534111
181.3		-0.20708	0.355237	-0.0483191
181.4		-0.223394	0.365123	-0.0439399
181.5		-0.240332	0.372679	-0.0401515
181.6		-0.257247	0.37759	-0.0368692
181.7		-0.273429	0.379611	-0.0340319
181.8		-0.288202	0.378596	-0.0316112
181.9		-0.300873	0.374525	-0.029598
182		-0.310855	0.367511	-0.0280091
182.1		-0.317582	0.357807	-0.0268953
182.2		-0.320631	0.345776	-0.0263246
182.3		-0.319718	0.331892	-0.0263787
182.4		-0.314706	0.316711	-0.0271154
182.5		-0.305654	0.300874	-0.02861
182.6		-0.292736	0.285048	-0.0309053
182.7		-0.276346	0.269949	-0.0340487
182.8		-0.257006	0.256237	-0.0380195
182.9		-0.235398	0.244529	-0.0427884
183		-0.212273	0.23531	-0.0482298
183.1		-0.188437	0.228972	-0.0542191
183.2		-0.164738	0.22574	-0.0605502
183.3		-0.141995	0.225752	-0.0670305
183.4		-0.121001	0.228944	-0.0733874
183.5		-0.102419	0.235138	-0.0793556
183.6		-0.0868014	0.243964	-0.0846395
183.7		-0.0745208	0.255004	-0.08895
183.8		-0.0657967	0.267707	-0.0920158
183.9		-0.0606386	0.281503	-0.0935858
184		-0.0588846	0.295746	-0.0934816
184.1		-0.0602011	0.309834	-0.0915516
184.2		-0.0640953	0.323147	-0.0877595
184.3		-0.0699677	0.335176	-0.0820927
184.4		-0.0770897	0.345471	-0.0746659
184.5		-0.0847214	0.353754	-0.0656236
184.6		-0.0920833	0.35985	-0.0552179
184.7		-0.0984597	0.363751	-0.0437232
184.8		-0.103197	0.365552	-0.0315068
184.9		-0.105726	0.365496	-0.0189526
185		-0.105659	0.363897	-0.00647165
185.1		-0.102717	0.361194	0.00550671
185.2		-0.0968293	0.357892	0.0166008
185.3		-0.0880331	0.354534	0.0264512
185.4		-0.0765309	0.351631	0.0347858
185.5		-0.0626471	0.349661	0.0413501
185.6		-0.0468317	0.34901	0.0459964
185.7		-0.0296282	0.34997	0.0486368
185.8		-0.0116131	0.352693	0.0492889
185.9		0.00659667	0.357216	0.0480542
186		0.0244087	0.363418	0.0451118
186.1		0.0412458	0.371027	0.0407316
186.2		0.0566197	0.379631	0.0352058
186.3		0.0701015	0.388711	0.0289108
186.4		0.0813678	0.397662	0.022225
186.5		0.0901924	0.405858	0.015583
186.6		0.0964708	0.412625	0.00937033
186.7		0.100197	0.417357	0.00397822
186.8		0.10145	0.419464	-0.000301068
186.9		0.100395	0.418469	-0.00315792
187		0.0972414	0.413977	-0.00437922
187.1		0.0922666	0.405801	-0.00377793
187.2		0.0857485	0.39387	-0.00127152
187.3		0.0779771	0.378306	0.00318213
187.4		0.0692246	0.359337	0.00954162
187.5		0.0597505	0.337353	0.017723
187.6		0.0497679	0.312814	0.0275562
187.7		0.0394656	0.286333	0.0388773
187.8		0.0289996	0.258538	0.0514699
187.9		0.0185092	0.230117	0.0651076
188		0.00807179	0.201723	0.0795098
188.1		-0.00224708	0.174013	0.094422
188.2		-0.0124188	0.147601	0.109563
188.3		-0.0223912	0.123029	0.124647
188.4		-0.0321155	0.100767	0.139362
188.5		-0.0415398	0.0811468	0.153419
188.6		-0.0505993	0.0644443	0.166526
188.7		-0.0591874	0.0508041	0.178427
188.8		-0.0671925	0.0403029	0.188842
188.9		-0.0744495	0.0328805	0.197525
189		-0.0807728	0.0284419	0.204248
189.1		-0.085922	0.0267775	0.208827
189.2		-0.0896693	0.0276343	0.211135
189.3		-0.0917571	0.030686	0.211099
189.4		-0.0919453	0.0355668	0.208737
189.5		-0.089995	0.0418546	0.204121
189.6		-0.0856872	0.0491134	0.197421
189.7		-0.0788179	0.0568486	0.188891
189.8		-0.0692531	0.0645596	0.178873
189.9		-0.0568972	0.0716948	0.167769
190		-0.0417293	0.0777265	0.156056
190.1		-0.0237854	0.0821171	0.14424
190.2		-0.00319802	0.0843696	0.13287
190.3		0.0198368	0.0840067	0.122474
190.4		0.0450311	0.080563	0.113549
190.5		0.0720118	0.073639	0.106546
190.6		0.10032	0.0628835	0.101853
190.7		0.129448	0.0480405	0.099758
190.8		0.158854	0.0289466	0.100437
190.9		0.187956	0.00558119	0.103961
191		0.216143	-0.0219894	0.110304
191.1		0.242802	-0.0535142	0.119313
191.2		0.267354	-0.0886471	0.13072
191.3		0.289255	-0.126874	0.144164
191.4		0.308078	-0.167565	0.159199
191.5		0.323443	-0.209964	0.175297
191.6		0.335099	-0.253227	0.191893
191.7		0.342866	-0.296463	0.208402
191.8		0.346706	-0.338691	0.224233
191.9		0.346665	-0.378935	0.238818
192		0.342884	-0.416219	0.251617
192.1		0.335612	-0.449672	0.262131
192.2		0.32515	-0.478488	0.269919
192.3		0.311884	-0.502018	0.274624
192.4		0.2962	-0.519722	0.27595
192.5		0.278531	-0.531277	0.273674
192.6		0.259274	-0.53649	0.267648
192.7		0.238845	-0.535415	0.257824
192.8		0.21759	-0.528217	0.244219
192.9		0.19583	-0.515269	0.226941
193		0.173833	-0.497036	0.206147
193.1		0.151812	-0.474161	0.182101
193.2		0.12996	-0.447355	0.155077
193.3		0.108377	-0.417438	0.125456
193.4		0.0871445	-0.385178	0.0936041
193.5		0.0662678	-0.351382	0.0599708
193.6		0.0457795	-0.316778	0.0249972
193.7		0.0256842	-0.282098	-0.0107983
193.8		0.00599311	-0.247943	-0.0469264
193.9		-0.013251	-0.214875	-0.0828621
194		-0.0320138	-0.183318	-0.118114
194.1		-0.0502418	-0.153637	-0.152174
194.2		-0.067878	-0.12607	-0.184554
194.3		-0.0848009	-0.100799	-0.214789
194.4		-0.100911	-0.077892	-0.242464
194.5		-0.116073	-0.0573995	-0.267196
194.6		-0.130217	-0.039266	-0.28861
194.7		-0.143371	-0.0234492	-0.3064
194.8		-0.155507	-0.00983036	-0.320306
194.9		-0.166505	0.00166834	-0.330158
195		-0.17623	0.0111662	-0.335803
195.1		-0.184632	0.0187239	-0.337177
195.2		-0.191735	0.0244505	-0.334236
195.3		-0.197711	0.028372	-0.327027
195.4		-0.202839	0.0305551	-0.315636
195.5		-0.207536	0.0310333	-0.300244
195.6		-0.212324	0.0298854	-0.281065
195.7		-0.217839	0.0271206	-0.258383
195.8		-0.224896	0.0228201	-0.232521
195.9		-0.234414	0.0170406	-0.203837
196		-0.247483	0.00991236	-0.172725
196.1		-0.265299	0.00153683	-0.139602
196.2		-0.289208	-0.00790118	-0.104913
196.3		-0.320621	-0.0182183	-0.0690756
196.4		-0.360989	-0.0291708	-0.0325176
196.5		-0.411794	-0.0405013	0.00435555
196.6		-0.474448	-0.0519073	0.0411437
196.7		-0.550263	-0.0630752	0.07747
196.8		-0.640333	-0.0736822	0.113
196.9		-0.745479	-0.0834173	0.147417
197		-0.86613	-0.0919781	0.180443
197.1		-1.00228	-0.0990782	0.211831
197.2		-1.15334	-0.104495	0.241367
197.3		-1.31817	-0.108048	0.268855
197.4		-1.49492	-0.109638	0.294094
197.5		-1.68113	-0.109178	0.316909
197.6		-1.8736	-0.106703	0.337133
197.7		-2.06856	-0.10227	0.354606
197.8		-2.2616	-0.0960475	0.369166
197.9		-2.44794	-0.0882135	0.380685
198		-2.6224	-0.0790557	0.389043
198.1		-2.77973	-0.0688574	0.394138
198.2		-2.91467	-0.0579769	0.395856
198.3		-3.02224	-0.0467425	0.394159
198.4		-3.09791	-0.0354989	0.389019
198.5		-3.13785	-0.0245592	0.380484
198.6		-3.13907	-0.0142099	0.368605
198.7		-3.09963	-0.00470619	0.353555
198.8		-3.01871	0.00374441	0.335533
198.9		-2.8967	0.0109872	0.314812
199		-2.73517	0.0169481	0.291688
199.1		-2.53684	0.0215762	0.26654
199.2		-2.30551	0.0249265	0.239768
199.3		-2.04592	0.0271013	0.211822
199.4		-1.76355	0.0282907	0.183152
199.5		-1.4644	0.0287009	0.154211
199.6		-1.15477	0.0285841	0.125419
199.7		-0.840996	0.0281965	0.0971567
[truncated: 5,003 more rows]

## Sheet: 16d13022.abf
	Current (pA)
time (ms)	10uM cocaine	30uM cocaine	100uM cocaine	300uM cocaine
0	-0.187592	-0.0649779	-0.126246	-0.00420299
0.0996094	-0.181127	-0.0871271	-0.117295	0.000947113
0.200195	-0.175694	-0.109227	-0.107438	0.00598968
0.299805	-0.171533	-0.130704	-0.0966468	0.0107437
0.400391	-0.168821	-0.150943	-0.0849233	0.0150407
0.5	-0.167666	-0.169346	-0.0722382	0.0187087
0.599609	-0.168126	-0.185357	-0.0585852	0.021588
0.700195	-0.17018	-0.198467	-0.0439984	0.0235124
0.799805	-0.173707	-0.208242	-0.0285101	0.0243156
0.900391	-0.178545	-0.214349	-0.0122193	0.0238702
1	-0.184408	-0.216522	0.00477595	0.0221196
1.09961	-0.190961	-0.214644	0.0223789	0.0190064
1.2002	-0.19783	-0.208715	0.0403975	0.0144981
1.2998	-0.204607	-0.198843	0.0586397	0.00865635
1.40039	-0.210889	-0.185268	0.0768604	0.00156773
1.5	-0.216265	-0.168287	0.0947787	-0.0066192
1.59961	-0.220318	-0.148318	0.11211	-0.0156845
1.7002	-0.222696	-0.125893	0.12854	-0.0253759
1.7998	-0.223074	-0.101561	0.14377	-0.0353605
1.90039	-0.221209	-0.0759415	0.157506	-0.0452574
2	-0.216956	-0.0496433	0.169437	-0.0546883
2.09961	-0.210235	-0.0232898	0.179316	-0.0632595
2.2002	-0.201079	0.00248667	0.186895	-0.0705395
2.2998	-0.189553	0.0271162	0.191966	-0.0761283
2.40039	-0.175805	0.0500518	0.194371	-0.0796545
2.5	-0.160113	0.0708118	0.194032	-0.0807588
2.59961	-0.142793	0.0890146	0.190935	-0.0791492
2.7002	-0.124258	0.104305	0.185133	-0.0746012
2.7998	-0.104952	0.116447	0.176723	-0.0669674
2.90039	-0.0853416	0.125262	0.16586	-0.0561726
3	-0.0659625	0.130694	0.152767	-0.0422436
3.09961	-0.0472922	0.132795	0.137739	-0.0253204
3.2002	-0.0298262	0.131653	0.12112	-0.00563778
3.2998	-0.0140296	0.127476	0.103299	0.016483
3.40039	-0.000303706	0.12052	0.0847048	0.0406268
3.5	0.0109638	0.111085	0.0657728	0.0662981
3.59961	0.0194986	0.0995488	0.046934	0.0929542
3.7002	0.0250921	0.0862863	0.0286279	0.120006
3.7998	0.0276434	0.0717417	0.0112458	0.146841
3.90039	0.0271711	0.0563235	-0.00484999	0.172857
4	0.0237627	0.0404437	-0.0193558	0.197472
4.09961	0.0175972	0.0245515	-0.0320537	0.220118
4.2002	0.00891303	0.00904384	-0.0427491	0.240272
4.2998	-0.0019866	-0.00567415	-0.0513681	0.257519
4.40039	-0.0147201	-0.0192569	-0.0579212	0.27154
4.5	-0.0288595	-0.0314106	-0.0625285	0.282105
4.59961	-0.0439075	-0.0418979	-0.0653889	0.289085
4.7002	-0.0594055	-0.0505672	-0.0667511	0.292486
4.7998	-0.0748884	-0.0572619	-0.0669664	0.29238
4.90039	-0.0899133	-0.0619217	-0.0663897	0.28893
5	-0.104122	-0.0645394	-0.0654569	0.282381
5.09961	-0.117155	-0.0651492	-0.0646087	0.273066
5.2002	-0.128725	-0.0638518	-0.0642462	0.261361
5.2998	-0.13865	-0.0607535	-0.0647841	0.247698
5.40039	-0.146804	-0.0560334	-0.0665325	0.232505
5.5	-0.153136	-0.049898	-0.0697656	0.216197
5.59961	-0.157672	-0.0425837	-0.0746475	0.199158
5.7002	-0.1605	-0.0343537	-0.0812573	0.181775
5.7998	-0.161811	-0.0254503	-0.0895984	0.164388
5.90039	-0.161852	-0.0161529	-0.0995148	0.147267
6	-0.160907	-0.00670934	-0.110775	0.130639
6.09961	-0.159308	0.00261974	-0.12302	0.114665
6.2002	-0.157387	0.0115989	-0.135833	0.0994521
6.2998	-0.155464	0.0200106	-0.148752	0.0850603
6.40039	-0.153856	0.0276305	-0.161275	0.0715302
6.5	-0.15285	0.0342783	-0.172932	0.0588958
6.59961	-0.15268	0.0397698	-0.183252	0.0471763
6.7002	-0.153541	0.0440064	-0.191818	0.0363812
6.7998	-0.155564	0.0468996	-0.198268	0.0265182
6.90039	-0.158782	0.0483713	-0.202323	0.017611
7	-0.163167	0.0483533	-0.203845	0.00968251
7.09961	-0.168619	0.0467865	-0.202793	0.00277011
7.2002	-0.174937	0.0436811	-0.199266	-0.00307783
7.2998	-0.181871	0.0390682	-0.193467	-0.00779648
7.40039	-0.189111	0.0330097	-0.18571	-0.0113147
7.5	-0.196277	0.0256219	-0.176405	-0.0135672
7.59961	-0.202982	0.0170122	-0.166007	-0.0145198
7.7002	-0.208858	0.00737295	-0.155062	-0.0141724
7.7998	-0.213521	-0.00313092	-0.144091	-0.0125632
7.90039	-0.216648	-0.0143013	-0.133606	-0.0097802
8	-0.217952	-0.0259507	-0.124098	-0.00593922
8.09961	-0.217202	-0.0378876	-0.115972	-0.00120516
8.2002	-0.214257	-0.0499043	-0.109587	0.00420507
8.2998	-0.209061	-0.0618243	-0.10514	0.010041
8.40039	-0.201646	-0.0735024	-0.102757	0.0160304
8.5	-0.192118	-0.0848338	-0.102441	0.0218462
8.59961	-0.180658	-0.095719	-0.10407	0.0271461
8.7002	-0.167517	-0.106116	-0.107401	0.0316298
8.7998	-0.15301	-0.116014	-0.112104	0.0350212
8.90039	-0.137487	-0.125433	-0.117793	0.037038
9	-0.121302	-0.134469	-0.124025	0.0374638
9.09961	-0.104824	-0.143209	-0.130375	0.0361327
9.2002	-0.0884117	-0.151782	-0.136368	0.0329407
9.2998	-0.0723703	-0.160315	-0.141558	0.0278315
9.40039	-0.0569671	-0.1689	-0.145555	0.0208388
9.5	-0.0424127	-0.177687	-0.148008	0.0120084
9.59961	-0.0288718	-0.186768	-0.148687	0.00145924
9.7002	-0.0164539	-0.196179	-0.147438	-0.0106199
9.7998	-0.00523393	-0.205937	-0.144175	-0.0240146
9.90039	0.0047622	-0.215993	-0.138949	-0.0384558
10	0.0135451	-0.226279	-0.131843	-0.0536244
10.0996	0.0211674	-0.236693	-0.123024	-0.0692098
10.2002	0.0276503	-0.247032	-0.112711	-0.0849067
10.2998	0.032984	-0.25709	-0.101123	-0.100426
10.4004	0.0371806	-0.266621	-0.0885448	-0.115499
10.5	0.040235	-0.275347	-0.0752803	-0.129845
10.5996	0.0421357	-0.283004	-0.0615999	-0.143204
10.7002	0.0428645	-0.289305	-0.0477825	-0.155363
10.7998	0.0423461	-0.293989	-0.0340126	-0.16612
10.9004	0.0405454	-0.296845	-0.0204602	-0.175324
11	0.0374357	-0.297682	-0.00726272	-0.182864
11.0996	0.0329569	-0.296363	0.00549052	-0.188664
11.2002	0.0271233	-0.292806	0.0177566	-0.192711
11.2998	0.0199583	-0.287013	0.0294874	-0.195045
11.4004	0.0115297	-0.279055	0.0406748	-0.195713
11.5	0.0019764	-0.269106	0.0513251	-0.194802
11.5996	-0.0085613	-0.257396	0.0614558	-0.192456
11.7002	-0.0198727	-0.244202	0.0710643	-0.188847
11.7998	-0.0317149	-0.229858	0.0801317	-0.184186
11.9004	-0.0438413	-0.214716	0.0886243	-0.178708
12	-0.0559209	-0.199175	0.0964869	-0.172632
12.0996	-0.0676408	-0.183644	0.103608	-0.166161
12.2002	-0.0786996	-0.168495	0.10986	-0.159482
12.2998	-0.0888034	-0.154074	0.115092	-0.152769
12.4004	-0.0977085	-0.140626	0.119136	-0.146148
12.5	-0.105185	-0.128346	0.121816	-0.139711
12.5996	-0.11104	-0.117359	0.12291	-0.133517
12.7002	-0.11514	-0.107709	0.122249	-0.127577
12.7998	-0.117391	-0.0993943	0.119715	-0.121832
12.9004	-0.117755	-0.0922997	0.11521	-0.116182
13	-0.116269	-0.0862691	0.108726	-0.110491
13.0996	-0.113025	-0.0811002	0.100285	-0.104612
13.2002	-0.10813	-0.0765462	0.0900082	-0.0983962
13.2998	-0.101719	-0.072417	0.0780988	-0.0917044
13.4004	-0.0939371	-0.0685071	0.064809	-0.0843941
13.5	-0.0849821	-0.0646289	0.0504972	-0.076327
13.5996	-0.0750509	-0.0606273	0.0355602	-0.0673898
13.7002	-0.0643579	-0.0563659	0.0204746	-0.0575567
13.7998	-0.0530898	-0.051831	0.00573942	-0.0468326
13.9004	-0.0414129	-0.0470179	-0.00816273	-0.0352477
14	-0.0294885	-0.0419961	-0.0207268	-0.0228871
14.0996	-0.017452	-0.0368917	-0.0315182	-0.00988982
14.2002	-0.00543439	-0.031834	-0.0401408	0.00361523
14.2998	0.00644083	-0.0270005	-0.0462608	0.0174649
14.4004	0.0181072	-0.0225361	-0.0496492	0.0314614
14.5	0.0294932	-0.0186214	-0.0501304	0.0453819
14.5996	0.0405509	-0.0154108	-0.0476965	0.0590339
14.7002	0.051275	-0.013043	-0.042401	0.0722215
14.7998	0.0616267	-0.0116432	-0.0344249	0.0847546
14.9004	0.0715906	-0.0112459	-0.0240631	0.096486
15	0.0811527	-0.0118846	-0.0116645	0.107305
15.0996	0.0902674	-0.0135507	0.00232298	0.117095
15.2002	0.0988997	-0.0161992	0.0174377	0.125759
15.2998	0.106978	-0.0197746	0.033161	0.133216
15.4004	0.114422	-0.0241596	0.0489645	0.13939
15.5	0.12114	-0.0292447	0.0643632	0.14423
15.5996	0.127018	-0.0349076	0.078849	0.147748
15.7002	0.131969	-0.0410168	0.0920134	0.149964
15.7998	0.135884	-0.047426	0.103491	0.150905
15.9004	0.13865	-0.0539915	0.113038	0.150614
16	0.140188	-0.060557	0.1205	0.149175
16.0996	0.140401	-0.0669754	0.125809	0.146703
16.2002	0.139223	-0.0730866	0.129025	0.143342
16.2998	0.136634	-0.0787516	0.130242	0.139275
16.4004	0.132641	-0.0838213	0.129699	0.134711
16.5	0.127285	-0.0881569	0.127679	0.12988
16.5996	0.120676	-0.0916294	0.124542	0.125004
16.7002	0.112944	-0.0940981	0.120674	0.120293
16.7998	0.104277	-0.0954524	0.116464	0.11596
16.9004	0.0949038	-0.0955775	0.112342	0.112213
17	0.0850697	-0.0943727	0.108668	0.109208
17.0996	0.0750537	-0.0917649	0.1058	0.107052
17.2002	0.0651523	-0.0877054	0.103993	0.105775
17.2998	0.0556811	-0.0822016	0.103449	0.10537
17.4004	0.0469311	-0.0752918	0.104289	0.105756
17.5	0.0391747	-0.0670469	0.106534	0.10681
17.5996	0.0326615	-0.0575832	0.110172	0.108332
17.7002	0.0276005	-0.0470568	0.115074	0.11009
17.7998	0.0241428	-0.0356486	0.121056	0.111812
17.9004	0.0223938	-0.0235738	0.127865	0.113234
18	0.0223606	-0.011086	0.135206	0.114123
18.0996	0.0239848	0.00159325	0.142747	0.114275
18.2002	0.0271799	0.0141877	0.150166	0.113498
18.2998	0.0317871	0.0264835	0.15715	0.111684
18.4004	0.0375822	0.0382691	0.163413	0.108794
18.5	0.0442999	0.049345	0.168723	0.104825
18.5996	0.0516037	0.0595733	0.172835	0.0998643
18.7002	0.059143	0.0688284	0.175603	0.0940659
18.7998	0.0665698	0.0770306	0.176891	0.0876018
18.9004	0.0734983	0.0841445	0.176631	0.0806965
19	0.0795997	0.0901894	0.174828	0.0735992
19.0996	0.0845493	0.0952175	0.171489	0.0665286
19.2002	0.0880187	0.0992991	0.166678	0.0596838
19.2998	0.0897628	0.10254	0.160513	0.0532479
19.4004	0.0895675	0.105042	0.153129	0.0473245
19.5	0.0872688	0.106931	0.144683	0.0419531
19.5996	0.0827964	0.1083	0.135301	0.0371331
19.7002	0.0761028	0.10921	0.12512	0.0327771
19.7998	0.067228	0.109731	0.114305	0.0287339
19.9004	0.056305	0.109906	0.102952	0.0248275
20	0.0434599	0.109763	0.0911991	0.0208179
20.0996	0.0288992	0.109327	0.0791508	0.0164302
20.2002	0.0129071	0.108603	0.0669025	0.0114097
20.2998	-0.00422033	0.107576	0.0545635	0.00550778
20.4004	-0.0221096	0.10625	0.0422258	-0.00150855
20.5	-0.0403983	0.104641	0.0299787	-0.00979643
20.5996	-0.0586996	0.102742	0.0179193	-0.0194541
20.7002	-0.0765813	0.100572	0.00607033	-0.0305599
20.7998	-0.0936549	0.0981391	-0.00551771	-0.0430958
20.9004	-0.109535	0.095448	-0.0167669	-0.056939
21	-0.123833	0.0925402	-0.0276232	-0.0719202
21.0996	-0.13624	0.0894433	-0.0380031	-0.0877954
21.2002	-0.146458	0.0861999	-0.047836	-0.104207
21.2998	-0.15429	0.0828564	-0.0570775	-0.12078
21.4004	-0.159631	0.0794087	-0.0656578	-0.137102
21.5	-0.162397	0.0758769	-0.0735405	-0.152757
21.5996	-0.162627	0.072249	-0.080682	-0.16733
21.7002	-0.160417	0.0684995	-0.0870551	-0.180388
21.7998	-0.15593	0.0646288	-0.0926362	-0.191523
21.9004	-0.149451	0.060601	-0.0973977	-0.200405
22	-0.141305	0.0564141	-0.10133	-0.206726
22.0996	-0.131862	0.0520682	-0.104435	-0.210253
22.2002	-0.121543	0.0475469	-0.106708	-0.210878
22.2998	-0.110744	0.0428979	-0.10816	-0.208569
22.4004	-0.099896	0.038167	-0.108805	-0.203342
22.5	-0.0894111	0.0334368	-0.10868	-0.195301
22.5996	-0.0796801	0.0288161	-0.107845	-0.184639
22.7002	-0.0710596	0.0244157	-0.106382	-0.171592
22.7998	-0.0637802	0.0203985	-0.104376	-0.156479
22.9004	-0.0580219	0.0168921	-0.101941	-0.13968
23	-0.0538657	0.014056	-0.0992042	-0.121615
23.0996	-0.0512894	0.0120549	-0.0963196	-0.102685
23.2002	-0.0502391	0.0109953	-0.0934553	-0.0832968
23.2998	-0.0505416	0.0109879	-0.0907959	-0.0638604
23.4004	-0.0519742	0.0120868	-0.088554	-0.0447545
23.5	-0.054268	0.0143123	-0.0869348	-0.0263176
23.5996	-0.0570705	0.0176529	-0.0861341	-0.00885798
23.7002	-0.0600558	0.021999	-0.0863283	0.00737525
23.7998	-0.0628626	0.027251	-0.0876456	0.0222477
23.9004	-0.0651214	0.0332269	-0.0902191	0.0356612
24	-0.0665195	0.0397081	-0.094093	0.047553
24.0996	-0.0667261	0.0464691	-0.0992901	0.057908
24.2002	-0.065485	0.0532571	-0.105754	0.0667815
24.2998	-0.0626088	0.0598431	-0.113328	0.0742608
24.4004	-0.0579761	0.0659775	-0.121826	0.0804396
24.5	-0.0515468	0.0714381	-0.130961	0.085461
24.5996	-0.043347	0.076048	-0.140439	0.0895148
24.7002	-0.0334928	0.0796402	-0.149882	0.092793
24.7998	-0.0221777	0.0821501	-0.158873	0.0954389
24.9004	-0.00967072	0.0835351	-0.167023	0.0976095
25	0.00366903	0.0838243	-0.173921	0.0994677
25.0996	0.0174569	0.083086	-0.179228	0.101138
25.2002	0.0312402	0.0814031	-0.18262	0.102721
25.2998	0.0445342	0.0789471	-0.183887	0.104278
25.4004	0.0568747	0.075891	-0.182902	0.105859
25.5	0.0677575	0.0724543	-0.17958	0.107489
25.5996	0.0767458	0.0688308	-0.173986	0.10919
25.7002	0.0834864	0.0651758	-0.166241	0.110948
25.7998	0.0876647	0.0616317	-0.15659	0.11274
25.9004	0.0890665	0.0583067	-0.145312	0.11451
26	0.0876185	0.0553114	-0.132747	0.116199
26.0996	0.0833278	0.052659	-0.119308	0.117744
26.2002	0.0763406	0.0503115	-0.105385	0.119063
26.2998	0.0668965	0.0481708	-0.0913478	0.120064
26.4004	0.0553432	0.0460802	-0.0775435	0.120641
26.5	0.0421189	0.0438829	-0.064273	0.120668
26.5996	0.0277621	0.0413681	-0.051788	0.120016
26.7002	0.0128019	0.0383338	-0.0402537	0.118552
26.7998	-0.00221288	0.0345565	-0.0297498	0.116141
26.9004	-0.0167227	0.02982	-0.0202666	0.112659
27	-0.0302384	0.0239288	-0.0117273	0.107993
27.0996	-0.042307	0.0167096	-0.00399206	0.102049
27.2002	-0.0525764	0.00808752	0.00311723	0.0947632
27.2998	-0.0608487	-0.00199954	0.00981866	0.0861024
27.4004	-0.0670247	-0.0135033	0.0163447	0.076081
27.5	-0.0711059	-0.0263132	0.0229294	0.0647457
27.5996	-0.0732192	-0.0402583	0.029774	0.0522154
27.7002	-0.0735809	-0.0550591	0.0370906	0.0386593
27.7998	-0.0724819	-0.0704169	0.0450144	0.0242812
27.9004	-0.0702997	-0.0859502	0.0536763	0.0093353
28	-0.0674404	-0.101256	0.0630684	-0.00588227
28.0996	-0.0642941	-0.115897	0.0731883	-0.0210643
28.2002	-0.0612719	-0.129424	0.083972	-0.0358861
28.2998	-0.0587538	-0.141402	0.0952795	-0.0499957
28.4004	-0.0570506	-0.151449	0.106944	-0.0630683
28.5	-0.0563907	-0.159236	0.118732	-0.0748029
28.5996	-0.0569507	-0.164464	0.130423	-0.0849128
28.7002	-0.0588261	-0.166938	0.141759	-0.0931589
28.7998	-0.0620307	-0.16653	0.152473	-0.0993586
28.9004	-0.0665061	-0.163224	0.16226	-0.103392
29	-0.0721299	-0.157141	0.170832	-0.10519
29.0996	-0.078746	-0.148481	0.177925	-0.104744
29.2002	-0.0861982	-0.137557	0.183253	-0.102091
29.2998	-0.0942707	-0.124734	0.186618	-0.0973153
29.4004	-0.102751	-0.110433	0.187823	-0.0905474
29.5	-0.111433	-0.0951709	0.186723	-0.0819422
29.5996	-0.120125	-0.0794709	0.183215	-0.0716917
29.7002	-0.128702	-0.0638781	0.177217	-0.0600117
29.7998	-0.137064	-0.0489594	0.168732	-0.0471315
29.9004	-0.145096	-0.0352077	0.157818	-0.0332998
30	-0.152759	-0.0231273	0.144608	-0.0187904
30.0996	-0.160012	-0.0131206	0.129332	-0.00385325
30.2002	-0.166841	-0.00548698	0.112236	0.0112501
30.2998	-0.173245	-0.000480401	0.0936084	0.0262464
30.4004	-0.179205	0.00174258	0.0738128	0.0408612
30.5	-0.184715	0.00114359	0.0532363	0.0548179
30.5996	-0.189754	-0.00224327	0.0323263	0.067852
30.7002	-0.194278	-0.00826545	0.0115345	0.0797252
30.7998	-0.198267	-0.0166826	-0.0086885	0.0902341
30.9004	-0.201633	-0.0271876	-0.0279044	0.0992131
31	-0.204277	-0.0394062	-0.0456979	0.106543
31.0996	-0.206091	-0.0529189	-0.061705	0.11211
31.2002	-0.206903	-0.0672615	-0.0756186	0.115863
31.2998	-0.206581	-0.0819261	-0.0872032	0.117831
31.4004	-0.204988	-0.0964186	-0.0963144	0.118087
31.5	-0.201976	-0.110282	-0.102884	0.116762
31.5996	-0.197451	-0.123062	-0.106944	0.114041
31.7002	-0.191299	-0.134362	-0.108633	0.110132
31.7998	-0.183452	-0.143864	-0.108148	0.105253
31.9004	-0.173899	-0.15131	-0.105747	0.0996837
32	-0.162674	-0.15655	-0.101742	0.093696
32.0996	-0.149908	-0.159504	-0.0964831	0.0875573
32.2002	-0.135782	-0.160181	-0.0903972	0.0815247
32.2998	-0.120492	-0.158664	-0.0839073	0.0758187
32.4004	-0.104301	-0.155104	-0.0774223	0.0706281
32.5	-0.0875235	-0.14973	-0.0713327	0.0661039
32.5996	-0.0705217	-0.142836	-0.0659531	0.0623297
32.7002	-0.0536892	-0.134729	-0.0615839	0.0593275
32.7998	-0.0374226	-0.125775	-0.0584223	0.0571401
32.9004	-0.0221083	-0.11629	-0.0566158	0.0557594
33	-0.00810509	-0.106597	-0.0562388	0.0551251
33.0996	0.00427526	-0.0970081	-0.057252	0.0551612
33.2002	0.0147753	-0.0877792	-0.059587	0.0558078
33.2998	0.0231983	-0.0791575	-0.0630548	0.0570043
33.4004	0.029443	-0.071296	-0.0674238	0.0586778
33.5	0.0334834	-0.0643278	-0.0724306	0.0607319
33.5996	0.0353818	-0.0583212	-0.0777148	0.0630886
33.7002	0.0352592	-0.0532979	-0.0829252	0.0656734
33.7998	0.0333148	-0.0492651	-0.0876848	0.0684295
33.9004	0.0298088	-0.0461606	-0.0916526	0.0712825
34	0.0250086	-0.0439264	-0.094508	0.0741776
34.0996	0.0192344	-0.0424516	-0.095912	0.0770558
34.2002	0.012792	-0.0416007	-0.0956461	0.0798555
34.2998	0.00597506	-0.0412481	-0.0935117	0.0824692
34.4004	-0.000922058	-0.0412302	-0.0893824	0.0847985
34.5	-0.00768096	-0.041446	-0.0832245	0.0867355
34.5996	-0.0141327	-0.041746	-0.0750461	0.0881695
34.7002	-0.020155	-0.0419701	-0.0649748	0.0889838
34.7998	-0.0257337	-0.0419631	-0.0531643	0.0890703
34.9004	-0.0308884	-0.0415512	-0.0398586	0.0883017
35	-0.0357029	-0.0406168	-0.0253352	0.0865463
35.0996	-0.0403228	-0.0390287	-0.00987564	0.0837119
35.2002	-0.0448909	-0.0366774	0.00616747	0.0797301
35.2998	-0.0495739	-0.0334843	0.0224718	0.0745477
35.4004	-0.0545388	-0.0294004	0.0386957	0.068143
35.5	-0.0599539	-0.0244291	0.0545347	0.0605315
35.5996	-0.0659587	-0.0186043	0.0697163	0.0517381
35.7002	-0.0726161	-0.0120124	0.0839655	0.0418418
35.7998	-0.0799698	-0.00478741	0.0970815	0.0309827
35.9004	-0.0879994	0.00289807	0.108844	0.0193141
36	-0.0965862	0.0108243	0.119147	0.00700316
36.0996	-0.105575	0.0187298	0.127866	-0.0057371
36.2002	-0.114737	0.0263534	0.134916	-0.0186916
36.2998	-0.123761	0.0334028	0.140272	-0.0316435
36.4004	-0.132329	0.0396248	0.143917	-0.0443356
36.5	-0.140092	0.0447503	0.1459	-0.0564703
36.5996	-0.146676	0.0485286	0.146256	-0.0677765
36.7002	-0.151738	0.0507673	0.145088	-0.0779927
36.7998	-0.154962	0.0513061	0.14249	-0.0868668
36.9004	-0.156069	0.0500657	0.138604	-0.094187
37	-0.154855	0.0470141	0.133639	-0.0997755
37.0996	-0.151187	0.042198	0.127784	-0.103452
37.2002	-0.144976	0.0357324	0.121294	-0.105077
37.2998	-0.136248	0.0277607	0.114386	-0.104555
37.4004	-0.125119	0.0184992	0.107343	-0.101843
37.5	-0.111778	0.00819724	0.100439	-0.0969434
37.5996	-0.0964846	-0.00285642	0.0939455	-0.0899357
37.7002	-0.0795649	-0.0143637	0.088141	-0.0809705
37.7998	-0.0614036	-0.0259745	0.0832609	-0.0702639
37.9004	-0.0424176	-0.0373885	0.079535	-0.0580579
38	-0.023029	-0.0482847	0.0770968	-0.0446458
38.0996	-0.00367411	-0.0583937	0.0760432	-0.0303491
38.2002	0.0152248	-0.0674984	0.0764226	-0.0155318
38.2998	0.0332404	-0.0753957	0.0782489	-0.000605087
38.4004	0.0500174	-0.0819631	0.0814346	0.0140135
38.5	0.0652434	-0.0871014	0.0858364	0.0279371
38.5996	0.0786651	-0.0907615	0.0912806	0.040777
38.7002	0.0901075	-0.0929741	0.0975216	0.0521592
38.7998	0.0994414	-0.0938046	0.104315	0.0617756
38.9004	0.106571	-0.093365	0.111356	0.0693764
39	0.111513	-0.0917978	0.11834	0.0747485
39.0996	0.114336	-0.0892846	0.124981	0.077786
39.2002	0.115159	-0.0860074	0.130967	0.0784355
39.2998	0.114152	-0.0821675	0.136068	0.0766957
39.4004	0.111509	-0.0779592	0.140077	0.0726636
39.5	0.107475	-0.0735511	0.142845	0.0665103
39.5996	0.102327	-0.0691331	0.144298	0.058456
39.7002	0.0962924	-0.0648633	0.144385	0.0488123
39.7998	0.0896063	-0.0608635	0.14311	0.0379364
39.9004	0.0825018	-0.0572337	0.140569	0.0261965
40	0.0751648	-0.0540374	0.13688	0.0140214
40.0996	0.0677484	-0.0513265	0.132239	0.00184709
40.2002	0.0603085	-0.0491637	0.126853	-0.00989775
40.2998	0.0528278	-0.0475744	0.120942	-0.0207652
40.4004	0.0452803	-0.046557	0.114747	-0.0302998
40.5	0.0375462	-0.0461178	0.108498	-0.0381037
40.5996	0.0294529	-0.0462618	0.102397	-0.0437969
40.7002	0.0208107	-0.0469959	0.096651	-0.0470284
40.7998	0.0113779	-0.0483428	0.0913728	-0.0475431
40.9004	0.000918391	-0.0503128	0.0866757	-0.045137
41	-0.0108216	-0.0529205	0.082621	-0.0396433
41.0996	-0.0241037	-0.0561899	0.079185	-0.0310081
41.2002	-0.0391017	-0.060106	0.0763249	-0.0192788
41.2998	-0.0559441	-0.0646515	0.0739209	-0.00457503
41.4004	-0.0746884	-0.0698067	0.0718273	0.0128984
41.5	-0.0952744	-0.0755112	0.069898	0.0328723
41.5996	-0.117555	-0.0816978	0.0679243	0.054982
41.7002	-0.141269	-0.0882419	0.0656925	0.0787679
41.7998	-0.166075	-0.0949922	0.0629999	0.103713
41.9004	-0.191561	-0.101782	0.0596617	0.12927
42	-0.217219	-0.108378	0.0555282	0.154841
42.0996	-0.242504	-0.114565	0.0504735	0.179809
42.2002	-0.266859	-0.120096	0.0444185	0.203588
42.2998	-0.289681	-0.124696	0.0373298	0.225614
42.4004	-0.310419	-0.128131	0.029231	0.245354
42.5	-0.328553	-0.130144	0.0202164	0.262353
42.5996	-0.343667	-0.13056	0.0104062	0.276223
42.7002	-0.355433	-0.129266	-4.47998e-05	0.286644
42.7998	-0.363606	-0.126174	-0.0109481	0.293408
42.9004	-0.368108	-0.121295	-0.0220755	0.29644
43	-0.368957	-0.114688	-0.0331792	0.295758
43.0996	-0.36629	-0.106521	-0.0440072	0.29149
43.2002	-0.360398	-0.0970623	-0.0543011	0.283853
43.2998	-0.351651	-0.0865918	-0.063822	0.273144
43.4004	-0.340522	-0.0754982	-0.07236	0.259748
43.5	-0.327526	-0.0641937	-0.079731	0.244114
43.5996	-0.313215	-0.05314	-0.085738	0.226751
43.7002	-0.298179	-0.0428104	-0.0902468	0.208163
43.7998	-0.282949	-0.0336259	-0.0931292	0.188833
43.9004	-0.268023	-0.0259972	-0.0942991	0.169262
44	-0.253837	-0.0202272	-0.0937079	0.149936
44.0996	-0.24075	-0.0165385	-0.0913161	0.131271
44.2002	-0.229048	-0.0150914	-0.0871617	0.113625
44.2998	-0.218919	-0.0158991	-0.0812896	0.0972929
44.4004	-0.210472	-0.0189077	-0.0737465	0.0824826
44.5	-0.203715	-0.023895	-0.0646286	0.069303
44.5996	-0.198567	-0.0305799	-0.0540456	0.0578106
44.7002	-0.194881	-0.0385971	-0.042179	0.0480095
44.7998	-0.19244	-0.0475035	-0.02921	0.0398219
44.9004	-0.191026	-0.056845	-0.0153849	0.0331216
45	-0.190375	-0.0661295	-0.00097964	0.0277698
45.0996	-0.190202	-0.0748855	0.0137423	0.0235804
45.2002	-0.190264	-0.0826843	0.0284385	0.0203367
45.2998	-0.19027	-0.0891162	0.0427966	0.0178461
45.4004	-0.189949	-0.0939066	0.0564535	0.0159325
45.5	-0.18909	-0.096831	0.0690734	0.0144373
45.5996	-0.187455	-0.0978018	0.0803548	0.0132378
45.7002	-0.184847	-0.0968195	0.0900069	0.0122514
45.7998	-0.181114	-0.0939982	0.0978057	0.0114392
45.9004	-0.176135	-0.0895404	0.103555	0.0107888
46	-0.169821	-0.0836925	0.107201	0.0103412
46.0996	-0.162127	-0.076776	0.10876	0.0101716
46.2002	-0.153027	-0.0691324	0.108326	0.0104188
46.2998	-0.142555	-0.0611739	0.106082	0.011245
46.4004	-0.130807	-0.0533041	0.102261	0.0128337
46.5	-0.11789	-0.0459128	0.0971752	0.0153426
46.5996	-0.104001	-0.0393666	0.0911726	0.0189366
46.7002	-0.0894028	-0.0339331	0.0846438	0.0238002
46.7998	-0.0743383	-0.0298697	0.0779834	0.0301071
46.9004	-0.0590868	-0.0273452	0.071554	0.0379788
47	-0.0439947	-0.0264856	0.0656885	0.0475298
47.0996	-0.0294004	-0.0273523	0.0606656	0.0588294
47.2002	-0.0156597	-0.0299319	0.0567044	0.0719153
47.2998	-0.00310188	-0.0341753	0.0539325	0.0867721
47.4004	0.00801034	-0.0399247	0.0523704	0.103329
47.5	0.0174241	-0.0470156	0.0519783	0.121461
47.5996	0.0249385	-0.0552278	0.0526318	0.140995
47.7002	0.0304641	-0.0643138	0.0541889	0.161716
47.7998	0.0339528	-0.074	0.0564592	0.183378
47.9004	0.0354178	-0.0839675	0.0592027	0.205695
48	0.0349753	-0.0939137	0.0622165	0.228369
48.0996	0.0328375	-0.103516	0.0652855	0.251102
48.2002	0.0292863	-0.112449	0.0682698	0.273573
48.2998	0.0246435	-0.120403	0.0710506	0.295467
48.4004	0.0192419	-0.127084	0.0735843	0.316486
48.5	0.0134484	-0.132221	0.075878	0.336344
48.5996	0.00766344	-0.135551	0.0779934	0.354781
48.7002	0.00224462	-0.136889	0.0800285	0.37156
48.7998	-0.0024864	-0.136065	0.0820923	0.386473
48.9004	-0.00623232	-0.133022	0.0843518	0.399347
49	-0.00875539	-0.12774	0.0869747	0.41005
49.0996	-0.009863	-0.120267	0.0901352	0.41847
49.2002	-0.0094412	-0.110758	0.0939855	0.424505
49.2998	-0.00746034	-0.0994208	0.0986308	0.428089
49.4004	-0.00395213	-0.0865442	0.104151	0.429181
49.5	0.000976295	-0.072495	0.110539	0.427768
49.5996	0.00712903	-0.0576856	0.11776	0.423891
49.7002	0.0142956	-0.0426063	0.125734	0.417625
49.7998	0.0222408	-0.0277674	0.134304	0.409064
49.9004	0.0307037	-0.0136622	0.143299	0.39835
50	0.0394064	-0.000786728	0.152494	0.385662
50.0996	0.0480422	0.0104296	0.161634	0.371243
50.2002	0.0562978	0.0195914	0.170483	0.355376
50.2998	0.0638885	0.0263547	0.178748	0.338373
50.4004	0.070563	0.0305038	0.186149	0.320581
50.5	0.076093	0.0319059	0.192432	0.302363
50.5996	0.0803065	0.03054	0.197351	0.284066
50.7002	0.0830481	0.0265161	0.200732	0.266064
50.7998	0.0842247	0.0200342	0.202422	0.248711
50.9004	0.083791	0.0113849	0.202323	0.232295
51	0.0817265	0.000976602	0.200406	0.217055
51.0996	0.0780914	-0.010725	0.196676	0.203168
51.2002	0.0729933	-0.0232189	0.191203	0.190731
51.2998	0.0665724	-0.0359773	0.184137	0.179778
51.4004	0.0590575	-0.0484602	0.175688	0.170258
51.5	0.0506474	-0.0601463	0.166101	0.162045
51.5996	0.0416186	-0.0705397	0.155656	0.154959
51.7002	0.0322974	-0.0792169	0.144683	0.148781
51.7998	0.022978	-0.0858134	0.133551	0.143239
51.9004	0.0140064	-0.0900476	0.122643	0.138036
52	0.00569949	-0.0917393	0.11231	0.132895
52.0996	-0.00163346	-0.0907828	0.10292	0.127568
52.2002	-0.00767374	-0.0871634	0.0947875	0.121861
52.2998	-0.0121776	-0.0809344	0.0881793	0.115656
52.4004	-0.0149152	-0.072199	0.0833072	0.108888
52.5	-0.0157165	-0.0611838	0.0803116	0.101582
52.5996	-0.0145085	-0.0481438	0.0792776	0.0938599
52.7002	-0.0112622	-0.0334054	0.0802059	0.0859238
52.7998	-0.00603978	-0.0173545	0.0830014	0.0780548
52.9004	0.00102631	-0.000378203	0.0875124	0.0705852
53	0.00972303	0.0170921	0.0934809	0.0638762
53.0996	0.0197693	0.0346169	0.100617	0.0583008
53.2002	0.0308424	0.0517372	0.108572	0.0542355
53.2998	0.0425425	0.0679718	0.116949	0.052027
53.4004	0.0544281	0.0829105	0.12537	0.0519723
53.5	0.066065	0.096137	0.133426	0.0542896
53.5996	0.0770059	0.107301	0.140768	0.0590883
53.7002	0.0868266	0.116084	0.147067	0.0663688
53.7998	0.095153	0.122204	0.152026	0.0760183
53.9004	0.101651	0.125473	0.155434	0.0878175
54	0.106052	0.125729	0.157092	0.101404
54.0996	0.10816	0.12294	0.156913	0.116309
54.2002	0.107842	0.117145	0.154883	0.131993
54.2998	0.105098	0.108485	0.151052	0.147844
54.4004	0.0999894	0.0972107	0.145558	0.16319
54.5	0.0926464	0.0835885	0.138544	0.177375
54.5996	0.0833068	0.0679598	0.130217	0.189753
54.7002	0.0722564	0.0506789	0.120802	0.199678
54.7998	0.0598087	0.0321667	0.110547	0.206586
54.9004	0.0463256	0.0128956	0.0997373	0.210028
55	0.0321694	-0.00669837	0.088593	0.209637
55.0996	0.0177079	-0.0261903	0.0773498	0.205162
55.2002	0.00328977	-0.0451997	0.0662122	0.19652
55.2998	-0.0107464	-0.0633896	0.055388	0.183792
55.4004	-0.0241373	-0.0804919	0.0450532	0.167176
55.5	-0.0366771	-0.096309	0.0353179	0.147
55.5996	-0.0481929	-0.110709	0.0262816	0.123727
55.7002	-0.0585894	-0.123618	0.0179906	0.0979167
55.7998	-0.0678186	-0.135046	0.0104893	0.0702081
55.9004	-0.0758695	-0.145053	0.00379373	0.0413231
56	-0.0828328	-0.153749	-0.0020992	0.0120013
56.0996	-0.0888256	-0.161289	-0.00721235	-0.0170045
56.2002	-0.0939591	-0.167841	-0.0116117	-0.0449393
56.2998	-0.0983489	-0.173614	-0.0153383	-0.0710984
56.4004	-0.102099	-0.178779	-0.0184812	-0.0948307
56.5	-0.10527	-0.183506	-0.0211031	-0.11555
56.5996	-0.107955	-0.187947	-0.0232875	-0.132764
56.7002	-0.110197	-0.192196	-0.0251174	-0.146105
56.7998	-0.112009	-0.196353	-0.0266507	-0.155316
56.9004	-0.113398	-0.200445	-0.0279923	-0.16027
57	-0.11432	-0.204496	-0.0292063	-0.160963
57.0996	-0.114679	-0.208467	-0.0303926	-0.157485
57.2002	-0.11437	-0.212302	-0.0316116	-0.150022
57.2998	-0.113266	-0.215932	-0.0329163	-0.138879
57.4004	-0.111238	-0.21924	-0.0343247	-0.124458
57.5	-0.108179	-0.222103	-0.0358242	-0.107226
57.5996	-0.103996	-0.22437	-0.0373917	-0.087693
57.7002	-0.0986196	-0.225889	-0.0389776	-0.066391
57.7998	-0.0920079	-0.2265	-0.0405232	-0.0438736
57.9004	-0.0841376	-0.226075	-0.0419362	-0.0206773
58	-0.0749983	-0.224511	-0.0431212	0.00267028
58.0996	-0.0646145	-0.221707	-0.0439262	0.025657
58.2002	-0.0530749	-0.217598	-0.0441978	0.0478487
58.2998	-0.0404846	-0.2121	-0.0437384	0.0688578
58.4004	-0.0269475	-0.205184	-0.0423654	0.088348
58.5	-0.0126213	-0.196844	-0.0399511	0.10605
58.5996	0.00233925	-0.187112	-0.036343	0.121793
58.7002	0.0177467	-0.176087	-0.0314801	0.135435
58.7998	0.0333874	-0.16388	-0.0253062	0.146896
58.9004	0.0490877	-0.15065	-0.0178329	0.156171
59	0.0646334	-0.136581	-0.00914397	0.163288
59.0996	0.079811	-0.121869	0.000643909	0.168288
59.2002	0.0944221	-0.106724	0.0113417	0.171281
59.2998	0.108248	-0.0913831	0.0227078	0.172384
59.4004	0.121117	-0.07611	0.0344179	0.171729
59.5	0.132865	-0.0611667	0.0461089	0.16947
59.5996	0.143314	-0.0467965	0.0574141	0.165773
59.7002	0.152335	-0.0332313	0.0679407	0.160788
59.7998	0.159828	-0.0206863	0.0773084	0.154702
59.9004	0.165697	-0.00933282	0.0851669	0.147713
60	0.169882	0.000693438	0.0911742	0.139994
60.0996	0.172361	0.00931901	0.095044	0.131732
60.2002	0.173149	0.0165135	0.0965835	0.123118
60.2998	0.172309	0.0222417	0.0956542	0.114336
60.4004	0.169895	0.0265283	0.0922229	0.105595
60.5	0.165999	0.0294333	0.0863297	0.0971039
60.5996	0.160755	0.0310547	0.0780712	0.0890438
60.7002	0.154289	0.0315137	0.0676658	0.0815882
60.7998	0.146772	0.0309235	0.0553927	0.0749026
60.9004	0.138383	0.0294145	0.0415858	0.0691203
61	0.129273	0.0271364	0.0266231	0.0643476
61.0996	0.119621	0.0241835	0.0108673	0.0606742
61.2002	0.109592	0.0206916	-0.00529085	0.0581071
61.2998	0.0993663	0.0167552	-0.0214734	0.0566006
61.4004	0.089152	0.0124193	-0.0373502	0.0560796
61.5	0.0790925	0.00772934	-0.0525695	0.0564168
61.5996	0.0693484	0.002707	-0.0668686	0.0574334
61.7002	0.0600718	-0.00262205	-0.0800114	0.0589072
61.7998	0.05138	-0.00824874	-0.0917829	0.0605552
61.9004	0.0434263	-0.0142304	-0.102049	0.0620915
62	0.0363193	-0.0205479	-0.110712	0.0632452
62.0996	0.030175	-0.0272043	-0.117782	0.0637302
62.2002	0.0251226	-0.0342029	-0.12332	0.0632825
62.2998	0.0212377	-0.0414905	-0.127392	0.0616998
62.4004	0.0186098	-0.0490314	-0.130112	0.0588115
62.5	0.0172686	-0.0567013	-0.131621	0.0544867
62.5996	0.0172459	-0.0643506	-0.132103	0.0486802
62.7002	0.0185691	-0.0718271	-0.131774	0.0414388
62.7998	0.0211947	-0.0789311	-0.130832	0.0328394
62.9004	0.0250882	-0.08548	-0.129497	0.0230032
63	0.0301568	-0.0912374	-0.127974	0.0121408
63.0996	0.0362793	-0.0959704	-0.126463	0.000495519
63.2002	0.043317	-0.0994469	-0.125169	-0.0116845
63.2998	0.0510429	-0.101411	-0.12427	-0.024141
63.4004	0.0592607	-0.101677	-0.123887	-0.0365951
63.5	0.0677372	-0.100077	-0.124092	-0.0487797
63.5996	0.0762149	-0.0964731	-0.124908	-0.0604632
63.7002	0.0844315	-0.0907875	-0.126338	-0.0714406
63.7998	0.0920694	-0.0829473	-0.12832	-0.0815547
63.9004	0.0988506	-0.0729611	-0.130722	-0.0907144
64	0.104509	-0.0608632	-0.133389	-0.0988846
64.0996	0.108786	-0.0467323	-0.136092	-0.106055
64.2002	0.111459	-0.0307207	-0.138575	-0.112241
64.2998	0.112285	-0.0129863	-0.140567	-0.11749
64.4004	0.11109	0.00624293	-0.141796	-0.121873
64.5	0.107719	0.0267379	-0.142007	-0.125472
64.5996	0.1021	0.0482414	-0.140922	-0.128368
64.7002	0.0942275	0.0704209	-0.13833	-0.130647
64.7998	0.0841225	0.0929565	-0.134061	-0.13238
64.9004	0.0718896	0.115483	-0.128005	-0.133628
65	0.0576625	0.137648	-0.120149	-0.13445
65.0996	0.0416094	0.159076	-0.110515	-0.134876
65.2002	0.0239883	0.179375	-0.0992466	-0.134898
65.2998	0.00508709	0.198171	-0.0865092	-0.13451
65.4004	-0.0147538	0.215061	-0.0725747	-0.133699
65.5	-0.0351526	0.229695	-0.0577537	-0.132444
65.5996	-0.0557345	0.241724	-0.0423803	-0.130739
65.7002	-0.076116	0.250854	-0.0268423	-0.128595
65.7998	-0.0959321	0.25683	-0.0115052	-0.126019
65.9004	-0.11484	0.259441	0.00322511	-0.123021
66	-0.132528	0.258602	0.0169792	-0.119621
66.0996	-0.148702	0.254282	0.0294114	-0.115848
66.2002	-0.163108	0.246539	0.0402088	-0.111739
66.2998	-0.175567	0.235489	0.0491398	-0.107324
66.4004	-0.185941	0.221342	0.0560314	-0.10267
66.5	-0.194163	0.204405	0.0607999	-0.0978524
66.5996	-0.200222	0.185039	0.0634062	-0.0929266
66.7002	-0.204135	0.163687	0.0638842	-0.0879446
66.7998	-0.206001	0.140806	0.0623279	-0.0829474
66.9004	-0.205964	0.116907	0.0588907	-0.0779596
67	-0.204176	0.0924894	0.0538082	-0.0730127
67.0996	-0.200836	0.0680391	0.0473366	-0.068144
67.2002	-0.196184	0.0440416	0.0397647	-0.0633648
67.2998	-0.190449	0.0209161	0.0314181	-0.0586837
67.4004	-0.183923	-0.000924554	0.0226705	-0.0541311
67.5	-0.176877	-0.0211626	0.01393	-0.0497282
67.5996	-0.169544	-0.0395572	0.00552639	-0.0454919
67.7002	-0.162177	-0.0559414	-0.00219628	-0.0414445
67.7998	-0.155037	-0.0702411	-0.00892281	-0.0376132
67.9004	-0.148284	-0.082438	-0.0143566	-0.0340344
68	-0.142069	-0.0926182	-0.0182098	-0.0307557
68.0996	-0.136518	-0.100906	-0.020304	-0.0278334
68.2002	-0.131705	-0.107499	-0.0204907	-0.0253073
68.2998	-0.127671	-0.112615	-0.0187071	-0.0232287
68.4004	-0.124381	-0.116501	-0.0149401	-0.0216456
68.5	-0.12176	-0.119431	-0.009226	-0.0205949
68.5996	-0.119682	-0.121672	-0.00165112	-0.0201119
68.7002	-0.117995	-0.12349	0.00765917	-0.0202172
68.7998	-0.116527	-0.125068	0.0185117	-0.0208972
68.9004	-0.115084	-0.126568	0.0306826	-0.0221252
69	-0.11348	-0.128101	0.0439068	-0.0238877
69.0996	-0.111526	-0.12968	0.0579256	-0.0261294
69.2002	-0.109099	-0.13131	0.0724793	-0.0287515
69.2998	-0.106128	-0.13291	0.0872748	-0.0316614
69.4004	-0.10256	-0.134348	0.102072	-0.0347471
69.5	-0.0983942	-0.13547	0.116582	-0.0379001
69.5996	-0.093679	-0.13607	0.130566	-0.0410099
69.7002	-0.0885291	-0.135965	0.143802	-0.0439453
69.7998	-0.0831172	-0.134976	0.156055	-0.0465793
69.9004	-0.0776209	-0.132915	0.167145	-0.0488381
70	-0.0722631	-0.129694	0.17688	-0.0506592
70.0996	-0.0672752	-0.125246	0.185126	-0.0519911
70.2002	-0.0628906	-0.119531	0.19179	-0.052827
70.2998	-0.0593485	-0.112618	0.196767	-0.0531914
70.4004	-0.056821	-0.104618	0.199972	-0.0531344
70.5	-0.0554273	-0.0957141	0.201361	-0.0527547
70.5996	-0.0552641	-0.0861628	0.200891	-0.0521562
70.7002	-0.056353	-0.0762176	0.198557	-0.0514713
70.7998	-0.0586359	-0.0662009	0.194381	-0.0508211
70.9004	-0.0620242	-0.0564453	0.188422	-0.0503129
71	-0.0663383	-0.0472535	0.180812	-0.050097
71.0996	-0.0713783	-0.0389301	0.171709	-0.0503316
71.2002	-0.0769247	-0.0317468	0.161312	-0.0511039
71.2998	-0.0827101	-0.0259193	0.149847	-0.0524695
71.4004	-0.0884801	-0.0215925	0.137541	-0.0544582
71.5	-0.0939759	-0.0188291	0.124658	-0.0570533
71.5996	-0.0989285	-0.0176284	0.111506	-0.0602014
71.7002	-0.10313	-0.0179177	0.0984056	-0.0638334
71.7998	-0.106385	-0.0195488	0.0856842	-0.0677993
71.9004	-0.108561	-0.0222992	0.0736534	-0.0719469
72	-0.109585	-0.0259067	0.0626072	-0.0761275
72.0996	-0.109409	-0.030039	0.0528054	-0.080184
72.2002	-0.108046	-0.0343518	0.0444442	-0.0839582
72.2998	-0.10554	-0.0385104	0.0376734	-0.0873214
72.4004	-0.101938	-0.0421741	0.0325822	-0.090157
72.5	-0.0973443	-0.0450525	0.0291446	-0.0923904
72.5996	-0.0918647	-0.0468601	0.02727	-0.0939928
72.7002	-0.0856294	-0.0473593	0.0268046	-0.094942
72.7998	-0.0787657	-0.0464023	0.0275157	-0.0952354
72.9004	-0.0713725	-0.0439095	0.0291128	-0.0949122
73	-0.0635519	-0.03992	0.0312466	-0.0940509
73.0996	-0.0553958	-0.0345207	0.0335641	-0.0927084
73.2002	-0.046973	-0.0278329	0.0356902	-0.0909434
73.2998	-0.0383597	-0.0200452	0.0372401	-0.088777
73.4004	-0.0295824	-0.0113625	0.0378664	-0.0862243
73.5	-0.0206559	-0.00208708	0.0372273	-0.0832636
73.5996	-0.0115743	0.00750354	0.0350812	-0.0798356
73.7002	-0.00232648	0.0171339	0.0312642	-0.0758401
73.7998	0.00706187	0.0265484	0.0256805	-0.0711714
73.9004	0.0165739	0.0355516	0.018337	-0.0657128
74	0.0261662	0.0439419	0.0093035	-0.0593263
74.0996	0.03576	0.0515757	-0.001247	-0.0518923
74.2002	0.0452604	0.058348	-0.0131001	-0.0433244
74.2998	0.0545131	0.0641898	-0.0260009	-0.0335494
74.4004	0.0633415	0.0690791	-0.0396389	-0.0225101
74.5	0.0715612	0.0729854	-0.0536973	-0.0102235
74.5996	0.0789442	0.0759576	-0.0678273	0.00321443
74.7002	0.0852771	0.0780237	-0.0816933	0.0176593
74.7998	0.0903254	0.079198	-0.0949799	0.032899
74.9004	0.0938452	0.079503	-0.107394	0.0486503
75	0.0956157	0.078929	-0.118711	0.064597
75.0996	0.0954569	0.0775064	-0.128698	0.0804038
75.2002	0.0932765	0.0752183	-0.137189	0.0956886
75.2998	0.0890181	0.0720275	-0.144052	0.110063
75.4004	0.0827019	0.0679162	-0.149189	0.123175
75.5	0.074435	0.062877	-0.152542	0.134683
75.5996	0.064367	0.0569499	-0.154015	0.144256
75.7002	0.0527195	0.0501979	-0.153579	0.151661
75.7998	0.0398021	0.0426933	-0.151202	0.156704
75.9004	0.0259297	0.0345463	-0.146891	0.159255
76	0.0114643	0.0258999	-0.140673	0.159248
76.0996	-0.00317192	0.0169288	-0.132569	0.156711
76.2002	-0.0176071	0.00785054	-0.122644	0.151715
76.2998	-0.0314864	-0.00111001	-0.110938	0.144405
76.4004	-0.0444747	-0.00969707	-0.0975833	0.135012
76.5	-0.0563292	-0.0176645	-0.0827173	0.123825
76.5996	-0.0668494	-0.0247767	-0.0665337	0.111162
76.7002	-0.0758719	-0.0308473	-0.0492913	0.09739
76.7998	-0.0833346	-0.0357483	-0.0312549	0.0828883
76.9004	-0.0892517	-0.039381	-0.0127559	0.0680342
77	-0.0936613	-0.0417133	0.00589131	0.0532217
77.0996	-0.0966577	-0.042737	0.024292	0.0388317
77.2002	-0.0983496	-0.0425151	0.0420574	0.0252057
77.2998	-0.0988526	-0.0411673	0.0587875	0.0126627
77.4004	-0.0983167	-0.0388703	0.0740812	0.00148069
77.5	-0.0969082	-0.0358189	0.087592	-0.00809685
77.5996	-0.0947487	-0.0322178	0.0989831	-0.0158704
77.7002	-0.091909	-0.0282923	0.107998	-0.0216969
77.7998	-0.0884447	-0.0242578	0.114422	-0.0255005
77.9004	-0.0844048	-0.0203529	0.118137	-0.0272415
78	-0.079788	-0.016759	0.1191	-0.0268993
78.0996	-0.0745893	-0.0136461	0.117353	-0.0244952
78.2002	-0.0687635	-0.0111773	0.112981	-0.0201069
78.2998	-0.0622543	-0.00944251	0.106152	-0.013837
78.4004	-0.0550477	-0.00854109	0.0971132	-0.00580638
78.5	-0.0471249	-0.00850849	0.0861397	0.00381843
78.5996	-0.0384778	-0.0093609	0.0735814	0.0148074
78.7002	-0.0291613	-0.011088	0.0597992	0.0269328
78.7998	-0.019249	-0.0136527	0.0451807	0.0399312
78.9004	-0.00886073	-0.0170052	0.0301091	0.0534931
79	0.00179912	-0.0210771	0.0149326	0.0673086
79.0996	0.0125225	-0.0257803	1.12165e-05	0.0810436
79.2002	0.0230422	-0.0309987	-0.0143463	0.0942914
79.2998	0.033069	-0.0366202	-0.0278701	0.106647
79.4004	0.0423149	-0.0425076	-0.0403108	0.117714
79.5	0.0504246	-0.0485183	-0.0514828	0.12707
79.5996	0.0570624	-0.0545135	-0.0612329	0.134294
79.7002	0.0619449	-0.0603725	-0.0694724	0.139013
79.7998	0.0647764	-0.065974	-0.0761912	0.140886
79.9004	0.0653543	-0.0712005	-0.0814231	0.139648
80	0.0635103	-0.0759187	-0.0852613	0.135107
80.0996	0.0591217	-0.0800371	-0.0878349	0.127122
80.2002	0.0521628	-0.0834844	-0.0892955	0.115638
80.2998	0.0426873	-0.0862176	-0.0898564	0.100738
80.4004	0.0308057	-0.0882426	-0.0897176	0.082596
80.5	0.0167387	-0.0895991	-0.0890913	0.06148
80.5996	0.000739622	-0.0903434	-0.0882223	0.0377844
80.7002	-0.0168551	-0.0905602	-0.0873316	0.0119644
80.7998	-0.0356363	-0.0903772	-0.0866223	-0.01548
80.9004	-0.0551735	-0.0899099	-0.0862554	-0.0439289
81	-0.0749918	-0.0892789	-0.0863381	-0.0727111
81.0996	-0.0945968	-0.0886159	-0.0869714	-0.101167
81.2002	-0.113543	-0.0880155	-0.0881684	-0.128623
81.2998	-0.131366	-0.0875873	-0.0898726	-0.154421
81.4004	-0.147659	-0.0873979	-0.091981	-0.177922
81.5	-0.162083	-0.0874319	-0.0943231	-0.198548
81.5996	-0.174319	-0.0876486	-0.0967364	-0.215794
81.7002	-0.184145	-0.0879366	-0.0990425	-0.229243
81.7998	-0.191387	-0.0881548	-0.101011	-0.238551
81.9004	-0.195935	-0.0881181	-0.102435	-0.243512
82	-0.197789	-0.0875543	-0.103081	-0.244055
82.0996	-0.196968	-0.086191	-0.102767	-0.240214
82.2002	-0.193592	-0.0837202	-0.10134	-0.232161
82.2998	-0.187832	-0.0798301	-0.0986798	-0.220222
82.4004	-0.17989	-0.0742246	-0.0947353	-0.204835
82.5	-0.170066	-0.0666118	-0.0894893	-0.186542
82.5996	-0.158626	-0.0568015	-0.0829606	-0.166005
82.7002	-0.145862	-0.0446227	-0.0752244	-0.143943
82.7998	-0.132081	-0.0299642	-0.0663733	-0.12111
82.9004	-0.11754	-0.0128375	-0.0565377	-0.0982773
83	-0.102536	0.00668055	-0.0458769	-0.0762208
83.0996	-0.0873185	0.0283484	-0.0345557	-0.0556706
83.2002	-0.0721359	0.0518699	-0.0227385	-0.037254
83.2998	-0.0572325	0.0768806	-0.010572	-0.0215028
83.4004	-0.0427426	0.102882	0.00180458	-0.00886079
83.5	-0.0287966	0.129322	0.014272	0.000402793
83.5996	-0.0154599	0.155535	0.0267494	0.00619003
83.7002	-0.00277591	0.180821	0.0391647	0.00851791
83.7998	0.00919922	0.20451	0.051443	0.00755936
83.9004	0.0204645	0.225899	0.0635221	0.00363284
84	0.0310226	0.244362	0.0753504	-0.00280049
84.0996	0.0408805	0.259281	0.0869162	-0.0112162
84.2002	0.0501058	0.270129	0.0981655	-0.0210188
84.2998	0.0587253	0.276505	0.109031	-0.0315821
84.4004	0.066783	0.278102	0.119446	-0.0422905
84.5	0.0743064	0.274819	0.129319	-0.0525802
84.5996	0.0813146	0.266652	0.138606	-0.0619076
84.7002	0.0878286	0.253768	0.147231	-0.0698194
84.7998	0.0938456	0.236477	0.155145	-0.0759761
84.9004	0.0993952	0.215201	0.162285	-0.0801432
85	0.104474	0.190532	0.168563	-0.0821797
85.0996	0.109084	0.163136	0.173936	-0.0820805
85.2002	0.113252	0.133794	0.178331	-0.0799459
85.2998	0.116978	0.103344	0.181774	-0.0759673
85.4004	0.120297	0.0726423	0.184278	-0.0704062
85.5	0.123257	0.0425356	0.185888	-0.063585
85.5996	0.12586	0.0138003	0.186674	-0.0558582
85.7002	0.128115	-0.0128085	0.186673	-0.0475811
85.7998	0.13008	-0.0366156	0.185983	-0.0390975
85.9004	0.131802	-0.0570627	0.184672	-0.0307566
86	0.133318	-0.0737014	0.182814	-0.0228827
86.0996	0.134657	-0.0862565	0.180471	-0.0157371
86.2002	0.135808	-0.0945313	0.177709	-0.00951738
86.2998	0.136743	-0.0985189	0.174611	-0.00437917
86.4004	0.137487	-0.0983026	0.171215	-0.000405811
86.5	0.138009	-0.0941147	0.167583	0.00239848
86.5996	0.138284	-0.0862832	0.163744	0.00408254
86.7002	0.138281	-0.0752267	0.159724	0.00473546
86.7998	0.13794	-0.0614281	0.155582	0.00448404
86.9004	0.137216	-0.0453728	0.151357	0.00346596
87	0.136094	-0.0276008	0.147111	0.00184505
87.0996	0.134565	-0.00863172	0.142884	-0.00020355
87.2002	0.132604	0.0110221	0.138734	-0.00250284
87.2998	0.13021	0.0308833	0.13474	-0.00489636
87.4004	0.127397	0.0505427	0.130945	-0.00723818
87.5	0.124212	0.0696193	0.127417	-0.00939368
87.5996	0.120726	0.0878163	0.124179	-0.0112645
87.7002	0.117013	0.104892	0.12128	-0.012769
87.7998	0.113156	0.120661	0.118749	-0.0138873
87.9004	0.109239	0.134984	0.116576	-0.0146243
88	0.105334	0.147748	0.114753	-0.0149972
88.0996	0.101498	0.158903	0.113211	-0.0150421
88.2002	0.0977652	0.168407	0.111887	-0.0148168
88.2998	0.0941453	0.176279	0.110703	-0.0143808
88.4004	0.0906386	0.182532	0.109568	-0.01381
88.5	0.0872189	0.187203	0.108392	-0.0131732
88.5996	0.0838725	0.190307	0.107085	-0.012541
88.7002	0.0805171	0.191877	0.105568	-0.0119553
88.7998	0.0770475	0.191984	0.103742	-0.0114452
88.9004	0.0733593	0.190652	0.101553	-0.0110619
89	0.0693173	0.187946	0.0989473	-0.0108372
89.0996	0.0648232	0.183929	0.095911	-0.0107995
89.2002	0.0597909	0.178651	0.0924385	-0.0109462
89.2998	0.0541379	0.172232	0.0885262	-0.0112605
89.4004	0.0478378	0.164743	0.0842218	-0.0117338
89.5	0.0408796	0.156281	0.0795345	-0.0123518
89.5996	0.0332976	0.146945	0.0745072	-0.0130924
89.7002	0.0251703	0.136807	0.0692067	-0.0139547
89.7998	0.0165648	0.125981	0.0636625	-0.0149356
89.9004	0.00762063	0.114577	0.0579367	-0.0159912
90	-0.00148123	0.102677	0.0520688	-0.0170636
90.0996	-0.010574	0.0904237	0.0460872	-0.0181039
90.2002	-0.0194552	0.0779268	0.0400434	-0.0190298
90.2998	-0.0279505	0.0652877	0.0339313	-0.0197585
90.4004	-0.0359041	0.0526251	0.0277673	-0.0202078
90.5	-0.0431504	0.0400559	0.0215873	-0.0202627
90.5996	-0.0496002	0.0277173	0.0154045	-0.0198086
90.7002	-0.0551845	0.0157582	0.00926079	-0.0187372
90.7998	-0.0598453	0.00429588	0.00320015	-0.0169332
90.9004	-0.0636171	-0.00651213	-0.00273205	-0.0143192
91	-0.0665421	-0.0164735	-0.00844464	-0.0108281
91.0996	-0.0686826	-0.0253884	-0.013852	-0.00641318
91.2002	-0.0701514	-0.0330916	-0.0188559	-0.00110606
91.2998	-0.0710538	-0.0394433	-0.0233343	0.00502543
91.4004	-0.071542	-0.0443212	-0.0271523	0.0119102
91.5	-0.0717852	-0.0475853	-0.0301698	0.0193924
91.5996	-0.0718945	-0.0491042	-0.0322292	0.027272
91.7002	-0.0719706	-0.0488051	-0.0331749	0.0353246
91.7998	-0.072069	-0.0466549	-0.0328503	0.0432782
91.9004	-0.0722055	-0.0426873	-0.0311171	0.0508287
92	-0.0723923	-0.0369989	-0.027907	0.0576873
92.0996	-0.072588	-0.0297032	-0.0231519	0.0635687
92.2002	-0.0727188	-0.0209856	-0.0168111	0.0682063
92.2998	-0.0726952	-0.0110581	-0.00888849	0.0713839
92.4004	-0.0724012	-0.000193823	0.00059675	0.0729198
92.5	-0.0716985	0.0112706	0.0115461	0.0726856
92.5996	-0.0704446	0.0230273	0.0238195	0.0706254
92.7002	-0.0684661	0.0347328	0.0372452	0.0667652
92.7998	-0.0656045	0.0460553	0.0515873	0.0611947
92.9004	-0.0617285	0.0566757	0.0666328	0.0540625
93	-0.0567421	0.066263	0.0821259	0.045549
93.0996	-0.0505906	0.074551	0.0978158	0.0358866
93.2002	-0.0432211	0.0812853	0.113458	0.0253198
93.2998	-0.0346091	0.0862572	0.128756	0.0141123
93.4004	-0.0248037	0.0893267	0.143459	0.00256227
93.5	-0.0138929	0.0903942	0.157312	-0.00901628
93.5996	-0.00199741	0.0894563	0.170097	-0.0203536
93.7002	0.0107087	0.0865078	0.181646	-0.0312223
93.7998	0.0239915	0.0815951	0.191776	-0.0413853
93.9004	0.0375692	0.0748295	0.200378	-0.0506477
94	0.0511393	0.0663181	0.207337	-0.0588815
94.0996	0.0643929	0.0562423	0.21258	-0.0659823
94.2002	0.0770039	0.0447476	0.216076	-0.0718601
94.2998	0.0886529	0.0320412	0.217789	-0.0764599
94.4004	0.0989825	0.0183194	0.217768	-0.0797855
94.5	0.107697	0.0037544	0.216021	-0.0818523
94.5996	0.11456	-0.0114429	0.212605	-0.0826943
94.7002	0.119379	-0.027085	0.207585	-0.0823592
94.7998	0.122038	-0.0429786	0.201005	-0.0809179
94.9004	0.122472	-0.0589556	0.192974	-0.0784083
95	0.120677	-0.0748664	0.183582	-0.0748912
95.0996	0.116739	-0.090541	0.172938	-0.0704504
95.2002	0.110816	-0.105834	0.161149	-0.0651716
95.2998	0.103126	-0.120582	0.148308	-0.0591309
95.4004	0.0939322	-0.13465	0.134554	-0.0524227
95.5	0.0835203	-0.147912	0.11999	-0.0451317
95.5996	0.072198	-0.160221	0.104776	-0.0373291
95.7002	0.0602728	-0.171442	0.0890649	-0.0291052
95.7998	0.048061	-0.181464	0.0730338	-0.0205423
95.9004	0.0358694	-0.190167	0.056893	-0.0117217
96	0.0239516	-0.197457	0.0408299	-0.00271496
96.0996	0.012518	-0.203223	0.0250693	0.00638758
96.2002	0.0017407	-0.207376	0.0097795	0.0154971
96.2998	-0.00828064	-0.20986	-0.00486391	0.0245269
96.4004	-0.0174612	-0.2106	-0.0186953	0.033397
96.5	-0.0257994	-0.209554	-0.031564	0.0420064
96.5996	-0.0333404	-0.206681	-0.0433423	0.0502628
96.7002	-0.0401665	-0.201971	-0.0539935	0.0580863
96.7998	-0.0463533	-0.195431	-0.0634726	0.0653862
96.9004	-0.052002	-0.187089	-0.0718337	0.0720743
97	-0.0572188	-0.17703	-0.0791675	0.0780974
97.0996	-0.0621291	-0.165328	-0.0856445	0.0833843
97.2002	-0.0668698	-0.152099	-0.0914894	0.0878406
97.2998	-0.0716032	-0.137472	-0.0969087	0.0913925
97.4004	-0.0764522	-0.121599	-0.102158	0.093956
97.5	-0.0815204	-0.104664	-0.107445	0.0954388
97.5996	-0.086921	-0.086868	-0.113018	0.0957807
97.7002	-0.0927126	-0.0684602	-0.11911	0.0949325
97.7998	-0.0989434	-0.049667	-0.125905	0.0928337
97.9004	-0.105661	-0.0307392	-0.133533	0.0894245
98	-0.112871	-0.0119107	-0.142043	0.0846679
98.0996	-0.120552	0.00653865	-0.151411	0.0785356
98.2002	-0.128665	0.0243747	-0.161548	0.0710165
98.2998	-0.137128	0.0413833	-0.1723	0.0621772
98.4004	-0.145846	0.0573838	-0.183439	0.0521176
98.5	-0.154712	0.0722329	-0.194696	0.0409582
98.5996	-0.163549	0.0858185	-0.205745	0.0289011
98.7002	-0.172206	0.098069	-0.216198	0.0161972
98.7998	-0.18052	0.108974	-0.2257	0.00309631
98.9004	-0.188273	0.118522	-0.233857	-0.0100736
99	-0.195306	0.126758	-0.24036	-0.0229539
99.0996	-0.201473	0.133744	-0.244924	-0.0351928
99.2002	-0.206607	0.139611	-0.247322	-0.046409
99.2998	-0.210604	0.144499	-0.247422	-0.0562138
99.4004	-0.21336	0.148541	-0.245133	-0.0642649
99.5	-0.214819	0.151867	-0.240455	-0.0702612
99.5996	-0.214999	0.15458	-0.233477	-0.0739629
99.7002	-0.213907	0.156768	-0.224347	-0.0752236
99.7998	-0.211623	0.158502	-0.213338	-0.0739821
99.9004	-0.208281	0.159822	-0.200774	-0.0702755
100	-0.204	0.160739	-0.187023	-0.0642463
100.1	-0.198938	0.161217	-0.172556	-0.0561146
100.2	-0.193255	0.161192	-0.157818	-0.0462137
100.3	-0.187102	0.160592	-0.143273	-0.0349634
100.4	-0.180658	0.159353	-0.129421	-0.022837
100.5	-0.174063	0.15741	-0.11669	-0.0102958
100.6	-0.167431	0.154713	-0.105484	0.00216397
100.7	-0.160885	0.151223	-0.0961311	0.014028
100.8	-0.154494	0.146908	-0.0888878	0.0248341
100.9	-0.148313	0.1418	-0.0839983	0.0342094
101	-0.142371	0.135965	-0.0816004	0.0418243
101.1	-0.136652	0.129501	-0.0817553	0.0474312
101.2	-0.131178	0.122572	-0.0844585	0.0509121
101.3	-0.125924	0.115343	-0.0895833	0.052227
101.4	-0.12084	0.107995	-0.096927	0.0514083
101.5	-0.115924	0.100707	-0.106245	0.0485805
101.6	-0.111147	0.0936313	-0.117223	0.0439527
101.7	-0.106496	0.0869569	-0.129522	0.0378083
101.8	-0.101971	0.0808067	-0.142751	0.0304653
101.9	-0.0975436	0.0752891	-0.156494	0.0222715
102	-0.093255	0.0704867	-0.170356	0.0135801
102.1	-0.0891181	0.0664062	-0.183965	0.00473907
102.2	-0.0851623	0.0630537	-0.196989	-0.00393592
102.3	-0.0814348	0.0603589	-0.209135	-0.0121656
102.4	-0.0779155	0.0582233	-0.220129	-0.0196879
102.5	-0.0746482	0.0565509	-0.229761	-0.0263005
102.6	-0.07166	0.0551729	-0.237899	-0.0318623
102.7	-0.068955	0.0539498	-0.244473	-0.0362609
102.8	-0.0665423	0.0527185	-0.249504	-0.0394158
102.9	-0.0643481	0.0513241	-0.25306	-0.0413256
103	-0.0623316	0.0496659	-0.255243	-0.0420229
103.1	-0.0604472	0.0476106	-0.256203	-0.0415404
103.2	-0.0586113	0.045063	-0.256102	-0.0399525
103.3	-0.0567768	0.0419472	-0.255147	-0.0373717
103.4	-0.0548511	0.038191	-0.253522	-0.0339166
103.5	-0.0527467	0.0337894	-0.251378	-0.0297045
103.6	-0.0503922	0.028691	-0.248876	-0.0248909
103.7	-0.0476896	0.0228816	-0.246096	-0.0196347
103.8	-0.0446054	0.0163636	-0.243101	-0.0140612
103.9	-0.0410939	0.00913735	-0.239901	-0.00829962
104	-0.037129	0.00126738	-0.236459	-0.0025035
104.1	-0.0327123	-0.00721965	-0.232698	0.00320799
104.2	-0.0278509	-0.0162742	-0.228442	0.00875574
104.3	-0.022602	-0.0258553	-0.223529	0.0140636
104.4	-0.0170433	-0.0359267	-0.217765	0.0190757
104.5	-0.0112873	-0.0463967	-0.21099	0.0237575
104.6	-0.00545241	-0.057203	-0.203068	0.0281145
104.7	0.000360564	-0.0682425	-0.193839	0.0321747
104.8	0.0059717	-0.0794105	-0.18324	0.0359918
104.9	0.0112324	-0.0905885	-0.171235	0.0396375
105	0.0159675	-0.101601	-0.15784	0.0431996
105.1	0.0200083	-0.112322	-0.143113	0.0467652
105.2	0.0232348	-0.122571	-0.127173	0.0504262
105.3	0.0255233	-0.132182	-0.110254	0.0542766
105.4	0.0267366	-0.140964	-0.0925834	0.0584092
105.5	0.026782	-0.148712	-0.0744492	0.0628789
105.6	0.0256062	-0.155257	-0.0561522	0.0677198
105.7	0.0231959	-0.160399	-0.0379936	0.0729508
105.8	0.0195603	-0.163993	-0.020296	0.0785661
105.9	0.0147294	-0.16587	-0.00336123	0.0845301
106	0.00875382	-0.165866	0.0125234	0.0907838
106.1	0.00176389	-0.163872	0.0271244	0.0972437
106.2	-0.00612462	-0.159782	0.0402529	0.103782
106.3	-0.0147474	-0.153543	0.0517473	0.110247
106.4	-0.0239023	-0.145131	0.0614788	0.116496
106.5	-0.033388	-0.134596	0.0693352	0.122393
106.6	-0.0430229	-0.122028	0.0752581	0.127783
106.7	-0.0525853	-0.107558	0.079229	0.132498
106.8	-0.0618888	-0.0913791	0.0812774	0.136382
106.9	-0.0707563	-0.0737035	0.0814641	0.139283
107	-0.0789773	-0.0548235	0.0798932	0.141088
107.1	-0.0863988	-0.0350383	0.0766776	0.141706
107.2	-0.0929301	-0.014716	0.0719533	0.14106
107.3	-0.0984798	0.00575675	0.0658727	0.139097
107.4	-0.10301	0.0259981	0.058628	0.135786
107.5	-0.106547	0.0455785	0.0504064	0.131122
107.6	-0.109122	0.0641259	0.0414476	0.125184
107.7	-0.110837	0.0812762	0.0320106	0.118098
107.8	-0.111825	0.0966806	0.0224041	0.110003
107.9	-0.112196	0.11003	0.0129291	0.101085
108	-0.112128	0.121051	0.00386701	0.091555
108.1	-0.111796	0.129544	-0.00446856	0.0816368
108.2	-0.111381	0.135343	-0.0118553	0.0715941
108.3	-0.111063	0.138364	-0.0180616	0.0617117
108.4	-0.110995	0.138564	-0.0228829	0.0522413
108.5	-0.111326	0.135979	-0.0261788	0.0433911
108.6	-0.112168	0.13069	-0.0278778	0.0353666
108.7	-0.113603	0.122822	-0.027998	0.0283507
108.8	-0.115652	0.112584	-0.0265798	0.022489
108.9	-0.1183	0.100189	-0.0237364	0.0178848
109	-0.121527	0.0859	-0.0196291	0.0145875
109.1	-0.125272	0.0699809	-0.0145013	0.0125711
109.2	-0.129433	0.0527272	-0.00860167	0.0117651
109.3	-0.13393	0.0345013	-0.00220907	0.0120448
109.4	-0.138616	0.0156491	0.00434739	0.0132637
109.5	-0.143348	-0.00348005	0.0108064	0.0152651
109.6	-0.147979	-0.0225119	0.0169073	0.0178731
109.7	-0.152383	-0.0410835	0.0224407	0.0208817
109.8	-0.156477	-0.0588131	0.0272464	0.0241189
109.9	-0.160134	-0.0753637	0.0311919	0.0274102
110	-0.163214	-0.0904237	0.034275	0.0305927
110.1	-0.165635	-0.103661	0.0365606	0.0335432
110.2	-0.167324	-0.114813	0.0381396	0.0361581
110.3	-0.168247	-0.12366	0.0391671	0.0383528
110.4	-0.168415	-0.130011	0.0398103	0.0400742
110.5	-0.167817	-0.133758	0.0403196	0.0412945
110.6	-0.166509	-0.134819	0.040963	0.0419839
110.7	-0.16455	-0.133202	0.0420018	0.0421152
110.8	-0.162027	-0.128984	0.0436554	0.0416699
110.9	-0.159096	-0.122309	0.0461238	0.0406658
111	-0.155911	-0.113382	0.0495621	0.0391416
111.1	-0.152645	-0.102446	0.054091	0.0370797
111.2	-0.149505	-0.089769	0.0597511	0.0344617
111.3	-0.146668	-0.0756828	0.0665198	0.0312881
111.4	-0.144336	-0.0605201	0.0742964	0.0275468
111.5	-0.14271	-0.0446292	0.0829246	0.0232435
111.6	-0.141944	-0.0283483	0.092184	0.0184172
111.7	-0.1422	-0.0120169	0.101799	0.0130752
111.8	-0.143583	0.00408679	0.111451	0.00721174
111.9	-0.14615	0.0196905	0.120776	0.000859606
112	-0.149938	0.0345504	0.129438	-0.00592138
112.1	-0.154904	0.0484859	0.137063	-0.0130747
112.2	-0.160989	0.061348	0.143287	-0.0205363
112.3	-0.168091	0.0730519	0.147806	-0.0282403
112.4	-0.176039	0.0835281	0.150329	-0.0361083
112.5	-0.18464	0.0927192	0.150668	-0.0440235
112.6	-0.19366	0.100617	0.148678	-0.0518899
112.7	-0.202836	0.107209	0.144288	-0.0596265
112.8	-0.211905	0.11253	0.137528	-0.0671424
112.9	-0.220581	0.116605	0.128467	-0.0743351
113	-0.228571	0.119428	0.117274	-0.0811401
113.1	-0.235587	0.12103	0.104172	-0.0874824
113.2	-0.241338	0.121399	0.0894372	-0.0932981
113.3	-0.245561	0.120556	0.073442	-0.0985512
113.4	-0.248017	0.118498	0.0565529	-0.103239
113.5	-0.248491	0.115208	0.0391965	-0.107369
113.6	-0.246822	0.11072	0.0217936	-0.110976
113.7	-0.242878	0.10505	0.00473963	-0.114138
113.8	-0.236543	0.0982602	-0.0115707	-0.116962
113.9	-0.22773	0.0903783	-0.0268271	-0.119604
114	-0.21642	0.0814494	-0.0407393	-0.122222
114.1	-0.202672	0.0715869	-0.0531028	-0.124973
114.2	-0.186567	0.0608845	-0.0637948	-0.128039
114.3	-0.168268	0.0495023	-0.0727307	-0.131652
114.4	-0.147991	0.0376045	-0.0799246	-0.136044
114.5	-0.125987	0.0253956	-0.0854237	-0.141441
114.6	-0.102577	0.0131043	-0.0893595	-0.148054
114.7	-0.0781202	0.000928261	-0.0919507	-0.156026
114.8	-0.0529918	-0.010885	-0.0934209	-0.165418
114.9	-0.027613	-0.0221057	-0.094042	-0.176234
115	-0.0024372	-0.0325363	-0.0940485	-0.188448
115.1	0.0220873	-0.0419764	-0.0937095	-0.201944
115.2	0.0455335	-0.0502884	-0.0932779	-0.216516
115.3	0.0674961	-0.0573413	-0.0929712	-0.231908
115.4	0.0876017	-0.0630944	-0.0930049	-0.247777
115.5	0.105547	-0.0675373	-0.093487	-0.263701
115.6	0.121071	-0.0707083	-0.0945334	-0.279265
115.7	0.133967	-0.072699	-0.0961913	-0.294029
115.8	0.144108	-0.0736496	-0.098468	-0.307518
115.9	0.151429	-0.0737434	-0.101347	-0.319279
116	0.155924	-0.0731945	-0.104728	-0.328908
116.1	0.157702	-0.0722254	-0.10852	-0.336041
116.2	0.156928	-0.0710698	-0.112552	-0.340407
116.3	0.153808	-0.0699556	-0.116678	-0.341848
116.4	0.148616	-0.0690672	-0.120731	-0.340276
116.5	0.141642	-0.0685565	-0.124534	-0.335676
116.6	0.133177	-0.0685109	-0.127907	-0.328134
116.7	0.123544	-0.0689693	-0.130631	-0.317824
116.8	0.113037	-0.0699073	-0.13256	-0.304967
116.9	0.101947	-0.0712432	-0.133496	-0.289848
117	0.0905546	-0.0728097	-0.133298	-0.272772
117.1	0.0790951	-0.0743573	-0.131825	-0.254048
117.2	0.0677581	-0.0756496	-0.128966	-0.233986
117.3	0.0567062	-0.0764497	-0.124671	-0.212894
117.4	0.0460661	-0.0765192	-0.118869	-0.191059
117.5	0.0359117	-0.0755633	-0.111588	-0.16873
117.6	0.0263079	-0.0733592	-0.102864	-0.146116
117.7	0.017346	-0.0697373	-0.0928128	-0.123402
117.8	0.00908049	-0.0645942	-0.0815994	-0.100746
117.9	0.00152848	-0.0579067	-0.0694143	-0.0782681
118	-0.00531736	-0.0497044	-0.0565128	-0.0560964
118.1	-0.0114412	-0.0401382	-0.0431513	-0.0343645
118.2	-0.0168167	-0.029372	-0.0296227	-0.0131769
118.3	-0.0214142	-0.0176474	-0.016217	0.00735217
118.4	-0.0252238	-0.00526756	-0.0032413	0.0270855
118.5	-0.0282399	0.00742463	0.00901807	0.0458744
118.6	-0.0304472	0.0200577	0.0203118	0.0635451
118.7	-0.0318785	0.0322971	0.0304262	0.0799156
118.8	-0.0325608	0.0438126	0.0392335	0.0948156
118.9	-0.0325307	0.0543191	0.0466031	0.108058
119	-0.0318739	0.0635656	0.0525011	0.119453
119.1	-0.0306546	0.0713651	0.0569397	0.128882
119.2	-0.0289636	0.077585	0.0599818	0.136233
119.3	-0.0269299	0.0821594	0.0617727	0.141418
119.4	-0.0246505	0.0850918	0.0624704	0.144443
119.5	-0.0222597	0.0864315	0.062271	0.145358
119.6	-0.0198692	0.0862791	0.0613818	0.144238
119.7	-0.0175508	0.0847878	0.0599865	0.141246
119.8	-0.0153883	0.082078	0.0583068	0.136614
119.9	-0.0134323	0.0783161	0.0565124	0.130606
120	-0.0117239	0.0736616	0.05472	0.123553
120.1	-0.0103098	0.0682786	0.0530529	0.11585
120.2	-0.00916938	0.0623003	0.0515462	0.107908
120.3	-0.00825263	0.0558383	0.050182	0.100164
120.4	-0.0075309	0.048966	0.0489259	0.0930699
120.5	-0.00695594	0.0417526	0.0476873	0.0870099
120.6	-0.00648268	0.0342474	0.0463853	0.0823418
120.7	-0.00604439	0.0264576	0.0449012	0.0793945
120.8	-0.00555765	0.0183867	0.0431011	0.0784329
120.9	-0.00497093	0.010046	0.0408996	0.0796481
121	-0.00422334	0.00142999	0.0381895	0.0831507
121.1	-0.00326892	-0.00743971	0.0348916	0.0889432
121.2	-0.00208623	-0.0165285	0.0309792	0.0968892
121.3	-0.000637594	-0.025796	0.0264321	0.106769
121.4	0.00107509	-0.0351473	0.0212867	0.118263
121.5	0.00301585	-0.0444961	0.0156049	0.130946
121.6	0.0051746	-0.0537362	0.00945461	0.144338
121.7	0.00747802	-0.0627229	0.00292606	0.157885
121.8	0.00984283	-0.0713178	-0.00386668	0.170994
121.9	0.012151	-0.0793193	-0.0108122	0.183071
122	0.0142849	-0.0865459	-0.0178047	0.193514
122.1	0.0161496	-0.0928461	-0.0247561	0.201745
122.2	0.0176258	-0.0980626	-0.0316	0.207261
122.3	0.0185868	-0.102101	-0.0382754	0.209639
122.4	0.0189118	-0.104837	-0.0447451	0.208559
122.5	0.0184663	-0.106187	-0.0509816	0.203821
122.6	0.0171942	-0.106129	-0.0569686	0.195349
122.7	0.0150107	-0.104651	-0.0627029	0.183165
122.8	0.011843	-0.101831	-0.0681714	0.167421
122.9	0.00769721	-0.0977732	-0.0733458	0.148409
123	0.00257626	-0.0925981	-0.07819	0.12655
123.1	-0.00343335	-0.086493	-0.0826194	0.102358
123.2	-0.0102275	-0.0796201	-0.0865775	0.0764447
123.3	-0.0176942	-0.0722044	-0.0899693	0.0494905
123.4	-0.0256441	-0.0644613	-0.092719	0.0221758
123.5	-0.0338963	-0.0566441	-0.0947719	-0.00483215
123.6	-0.042194	-0.0490232	-0.096089	-0.0308395
123.7	-0.0502578	-0.0418126	-0.0966787	-0.0551785
123.8	-0.0578187	-0.0352343	-0.0965738	-0.0772819
123.9	-0.0645838	-0.0294772	-0.0958671	-0.0966788
124	-0.0702851	-0.024672	-0.0947141	-0.112997
124.1	-0.0746638	-0.0209354	-0.0932935	-0.125992
124.2	-0.0774916	-0.0182816	-0.0918555	-0.135533
124.3	-0.0785892	-0.0167391	-0.0906489	-0.141595
124.4	-0.0778014	-0.0162761	-0.0899743	-0.144272
124.5	-0.0750385	-0.0168125	-0.0900928	-0.143802
124.6	-0.0702331	-0.0182444	-0.0912491	-0.140529
124.7	-0.0634305	-0.0203798	-0.0936858	-0.13485
124.8	-0.0547536	-0.0230399	-0.0975358	-0.127237
124.9	-0.0443467	-0.0259965	-0.102914	-0.118196
125	-0.032462	-0.0290621	-0.10982	-0.108233
125.1	-0.0193538	-0.0320896	-0.118171	-0.0978122
125.2	-0.00530984	-0.0349086	-0.12783	-0.0873956
125.3	0.00932366	-0.0374113	-0.138535	-0.077376
125.4	0.0241909	-0.0395099	-0.150026	-0.0680794
125.5	0.0389389	-0.0412231	-0.16196	-0.0597419
125.6	0.0531976	-0.0426057	-0.173988	-0.0525199
125.7	0.0666297	-0.0437664	-0.185739	-0.0464766
125.8	0.0789354	-0.0448785	-0.19685	-0.0416062
125.9	0.0898767	-0.046099	-0.207009	-0.0378179
126	0.0992865	-0.0476358	-0.215927	-0.0349514
126.1	0.107047	-0.0496808	-0.223375	-0.0327694
126.2	0.113057	-0.0524503	-0.229163	-0.0310346
126.3	0.117303	-0.0561129	-0.233176	-0.02949
126.4	0.119821	-0.0607552	-0.235374	-0.0278631
126.5	0.120664	-0.0664222	-0.235743	-0.025887
126.6	0.119941	-0.0730509	-0.234328	-0.0233125
126.7	0.117793	-0.0805323	-0.231203	-0.0199419
126.8	0.114347	-0.0886442	-0.226476	-0.0156274
126.9	0.109772	-0.0970977	-0.220296	-0.0102639
127	0.104237	-0.105559	-0.212826	-0.00381837
127.1	0.0978878	-0.113618	-0.204274	0.00369003
127.2	0.0908943	-0.120864	-0.194828	0.012197
127.3	0.0834125	-0.126837	-0.184715	0.0215891
127.4	0.0755658	-0.131122	-0.174151	0.0317021
127.5	0.0675031	-0.133316	-0.163341	0.0423257
127.6	0.0593443	-0.133073	-0.152514	0.0532168
127.7	0.0511613	-0.13016	-0.141863	0.0641313
127.8	0.0430503	-0.124398	-0.13161	0.0748195
127.9	0.0350982	-0.115747	-0.121914	0.0850014
128	0.02738	-0.104245	-0.112898	0.0944
128.1	0.0199899	-0.0900639	-0.104675	0.102757
128.2	0.0129897	-0.0734516	-0.0972742	0.109842
128.3	0.00639155	-0.054756	-0.0907228	0.11546
128.4	0.000251904	-0.0343935	-0.0849732	0.119455
128.5	-0.0054245	-0.0128369	-0.0799571	0.121706
128.6	-0.0106635	0.00936325	-0.0755574	0.122104
128.7	-0.0154981	0.0317033	-0.0716318	0.120602
128.8	-0.019994	0.0536501	-0.068006	0.11719
128.9	-0.0242434	0.0747159	-0.0644924	0.111879
129	-0.0283557	0.0944787	-0.0609206	0.104741
129.1	-0.0324384	0.112538	-0.0571019	0.0958955
129.2	-0.0366321	0.128621	-0.052921	0.0854915
129.3	-0.0410892	0.142519	-0.0482771	0.0737224
129.4	-0.0459392	0.154087	-0.043088	0.0608208
129.5	-0.0513052	0.1633	-0.0373558	0.0470154
129.6	-0.0572632	0.170192	-0.0310762	0.0325868
129.7	-0.0638554	0.174858	-0.0243136	0.017835
129.8	-0.0710839	0.177486	-0.0171997	0.00306588
129.9	-0.0788723	0.178252	-0.00985677	-0.011391
130	-0.0871143	0.177398	-0.00246763	-0.0252068
130.1	-0.0956194	0.17515	0.00481245	-0.0380778
130.2	-0.104152	0.171697	0.0118464	-0.0497021
130.3	-0.112431	0.167232	0.0184714	-0.05983
130.4	-0.120089	0.161884	0.0245786	-0.0682718
130.5	-0.12675	0.155736	0.0300726	-0.0748694
130.6	-0.132025	0.14887	0.0348809	-0.0795302
130.7	-0.135506	0.141304	0.0390042	-0.0822294
130.8	-0.136851	0.133021	0.0424288	-0.0829912
130.9	-0.135749	0.123986	0.0451555	-0.0819085
131	-0.131929	0.114107	0.0472145	-0.079146
131.1	-0.125245	0.103305	0.0486214	-0.074914
131.2	-0.115617	0.0915102	0.0494031	-0.0694976
131.3	-0.103102	0.0786595	0.0495679	-0.0632388
131.4	-0.0878854	0.0647273	0.0490971	-0.0564381
131.5	-0.0702375	0.0497508	0.0479541	-0.0494008
131.6	-0.0505855	0.0338027	0.0460654	-0.0424641
131.7	-0.0294339	0.0169944	0.0433287	-0.0359262
131.8	-0.00735665	-0.000497523	0.0396406	-0.0300294
131.9	0.0149795	-0.0184363	0.0349026	-0.0249852
132	0.03689	-0.0365386	0.029015	-0.02094
132.1	0.0576704	-0.0545101	0.021883	-0.0179882
132.2	0.0766319	-0.0720299	0.0134093	-0.0161965
132.3	0.0931489	-0.0887147	0.00355455	-0.0155742
132.4	0.106642	-0.104217	-0.00766907	-0.0160665
132.5	0.116607	-0.118196	-0.0202152	-0.0175617
132.6	0.122662	-0.130363	-0.0339309	-0.0199035
132.7	0.124544	-0.140495	-0.0486181	-0.0229128
132.8	0.122139	-0.148393	-0.0640256	-0.026405
132.9	0.115442	-0.153972	-0.0798467	-0.0301936
133	0.104561	-0.157168	-0.0957558	-0.0340874
133.1	0.0897206	-0.158003	-0.111392	-0.0379123
133.2	0.0712575	-0.156596	-0.126379	-0.0414813
133.3	0.0495954	-0.153132	-0.140319	-0.0446341
133.4	0.025238	-0.147905	-0.152838	-0.0472409
133.5	-0.00127997	-0.141223	-0.163628	-0.0492056
133.6	-0.0293579	-0.133439	-0.172369	-0.0504618
133.7	-0.0584034	-0.124918	-0.178814	-0.0509738
133.8	-0.0878031	-0.116016	-0.182744	-0.0507168
133.9	-0.116946	-0.107139	-0.184004	-0.0496872
134	-0.145297	-0.0986067	-0.18254	-0.0479017
134.1	-0.172325	-0.0907103	-0.17834	-0.0454181
134.2	-0.19752	-0.0836889	-0.171473	-0.0422798
134.3	-0.220468	-0.0777091	-0.162038	-0.038537
134.4	-0.240743	-0.0728945	-0.150215	-0.0342614
134.5	-0.258017	-0.0692517	-0.136296	-0.0295281
134.6	-0.271997	-0.0667728	-0.120586	-0.0243904
134.7	-0.282459	-0.0653569	-0.103467	-0.018905
134.8	-0.28927	-0.0648537	-0.0853461	-0.0131292
134.9	-0.292354	-0.0650875	-0.0666655	-0.007131
135	-0.291716	-0.0658181	-0.0479187	-0.000949641
135.1	-0.287422	-0.0668299	-0.0295548	0.00536138
135.2	-0.279599	-0.0678917	-0.0120671	0.0117331
135.3	-0.268483	-0.0687541	0.00411269	0.0181008
135.4	-0.254333	-0.0691795	0.0185489	0.0243836
135.5	-0.237491	-0.0689211	0.030878	0.0304834
135.6	-0.218351	-0.067788	0.0408185	0.0362964
135.7	-0.197315	-0.0656106	0.0481446	0.0416963
135.8	-0.174843	-0.0622189	0.0527576	0.0465399
135.9	-0.151438	-0.0574947	0.0546096	0.0507036
136	-0.127577	-0.05135	0.0537524	0.0540575
136.1	-0.103741	-0.0437417	0.0503267	0.0564545
136.2	-0.0803858	-0.0346495	0.044563	0.0577793
136.3	-0.0579207	-0.0241055	0.0367923	0.0579552
136.4	-0.0367527	-0.0121999	0.0273394	0.0569153
136.5	-0.0172585	0.000918244	0.016636	0.0546165
136.6	0.000244779	0.015043	0.0051111	0.0510812
136.7	0.0154794	0.0298753	-0.00675279	0.0463867
136.8	0.0282188	0.0450945	-0.01851	0.0406426
136.9	0.0383279	0.0602915	-0.0297656	0.0340113
137	0.0456777	0.0750364	-0.040139	0.0266994
137.1	0.0501863	0.0888583	-0.0493195	0.0189236
137.2	0.0518428	0.101268	-0.057005	0.0109232
137.3	0.0506805	0.111772	-0.0629998	0.00294788
137.4	0.0467813	0.119923	-0.0671736	-0.00475709
137.5	0.0402723	0.125328	-0.069479	-0.0119386
137.6	0.0313178	0.127644	-0.0699659	-0.0183888
137.7	0.0201268	0.126652	-0.0687299	-0.0238961
137.8	0.0069406	0.122197	-0.0659178	-0.028316
137.9	-0.00795109	0.11431	-0.0617242	-0.0315776
138	-0.0242476	0.103137	-0.0563953	-0.0336587
138.1	-0.0415788	0.0889544	-0.0502104	-0.0345731
138.2	-0.0595374	0.0721832	-0.0434728	-0.0344092
138.3	-0.0777223	0.0533139	-0.0364534	-0.0332592
138.4	-0.0957305	0.0329525	-0.0294426	-0.0312858
138.5	-0.113156	0.0117493	-0.0227069	-0.028702
138.6	-0.129641	-0.00960977	-0.0164637	-0.0257116
138.7	-0.144816	-0.0304406	-0.0109344	-0.0225069
138.8	-0.158362	-0.0500986	-0.00624635	-0.0193143
138.9	-0.170027	-0.0680133	-0.00250162	-0.0163275
139	-0.179614	-0.0836942	0.000227622	-0.0136801
139.1	-0.186986	-0.0967562	0.00192464	-0.0114636
139.2	-0.192103	-0.106962	0.00259892	-0.0097283
139.3	-0.194979	-0.11421	0.00230101	-0.00846116
139.4	-0.1957	-0.1185	0.00110449	-0.00765563
139.5	-0.194421	-0.119985	-0.000899612	-0.00727938
139.6	-0.191325	-0.118905	-0.00356839	-0.00723065
139.7	-0.186695	-0.115577	-0.00677383	-0.00740041
139.8	-0.180834	-0.110401	-0.0103528	-0.00768322
139.9	-0.174021	-0.103788	-0.0141475	-0.00793704
140	-0.166575	-0.0961641	-0.0179926	-0.00804449
140.1	-0.158783	-0.0879008	-0.021676	-0.00791495
140.2	-0.150904	-0.0793241	-0.0249756	-0.00748071
140.3	-0.143196	-0.0707065	-0.0276984	-0.0067373
140.4	-0.135843	-0.0622341	-0.029632	-0.00575499
140.5	-0.128994	-0.0540085	-0.0305949	-0.00463305
140.6	-0.12275	-0.0460491	-0.0304083	-0.00348102
140.7	-0.117117	-0.0382647	-0.0288873	-0.00244494
140.8	-0.112082	-0.0304882	-0.0258832	-0.00166908
140.9	-0.107587	-0.0224904	-0.0212786	-0.00129177
141	-0.103543	-0.0140069	-0.0150147	-0.0014758
141.1	-0.0998687	-0.00475805	-0.00709996	-0.00234567
141.2	-0.0964412	0.0055012	0.00241582	-0.00396415
141.3	-0.0931392	0.0170217	0.0133846	-0.00637235
141.4	-0.089846	0.0300021	0.025621	-0.00955756
141.5	-0.0864592	0.0445359	0.0388972	-0.0134328
141.6	-0.082936	0.0606619	0.0528639	-0.0178616
141.7	-0.0792534	0.0783082	0.0671552	-0.0226792
141.8	-0.0754312	0.0973231	0.0813215	-0.0276829
141.9	-0.0715221	0.117483	0.0948717	-0.0326797
142	-0.0675661	0.138417	0.107353	-0.0374614
142.1	-0.0636698	0.159709	0.118275	-0.0418265
142.2	-0.0599434	0.180865	0.127175	-0.0456249
142.3	-0.0564838	0.201342	0.13361	-0.0487668
142.4	-0.053418	0.220586	0.1372	-0.05118
142.5	-0.0508128	0.237988	0.13767	-0.0528546
142.6	-0.0487165	0.252988	0.134787	-0.0538415
142.7	-0.0471378	0.265041	0.128439	-0.0542417
142.8	-0.0460066	0.273647	0.118614	-0.0541825
142.9	-0.0452437	0.278413	0.105405	-0.0538287
143	-0.0447101	0.278987	0.0890229	-0.0533612
[truncated: 5,570 more rows]

## Sheet: 16d0526.abf
	Current (pA)
[truncated: 7,002 more rows]

[truncated: 1 more sheets: 16d05008.abf]
