# Supplementary material for: A label-free approach to detect ligand binding to cell surface proteins in real time
Source: eLife journal article supplement (doi:10.7554/elife.34944), 2018-04-26
Supplement: supp [file Fig1g.xlsx]

## Sheet: Cl-
	I(pA)
time (ms)	16922002.abf	16922003.abf	16922006.abf	16922007.abf	16922009.abf	16922013.abf	16922018.abf	17n06052.abf	17n06053.abf		Currents were evoked by application of 100 uM cocaine in presence of extracellular chloride.
0	0.142813	-0.0537206	-0.0773428	0.255781	-0.0884823	-0.323555	-0.0335174	0.191147	0.208129
0.100098	0.136589	-0.0518221	-0.069231	0.24017	-0.0847778	-0.32294	-0.0191796	0.168329	0.200964
0.200195	0.129925	-0.04808	-0.0582608	0.223009	-0.0804037	-0.319801	-0.00166653	0.143595	0.193679
0.299805	0.122723	-0.0424068	-0.04437	0.204712	-0.075632	-0.314149	0.0183397	0.117558	0.1863
0.399902	0.114884	-0.0347966	-0.0275939	0.185646	-0.0707277	-0.306097	0.0401159	0.0908288	0.178867
0.5	0.106305	-0.025343	-0.00811959	0.166174	-0.0659575	-0.295801	0.0629007	0.0641358	0.171434
0.600098	0.0969009	-0.0142033	0.0138001	0.146566	-0.061572	-0.283535	0.0859062	0.0382034	0.164086
0.700195	0.0866394	-0.00160645	0.0378087	0.127165	-0.0578026	-0.269582	0.108366	0.0137178	0.1569
0.799805	0.0755053	0.0121987	0.0634911	0.108206	-0.0548634	-0.25427	0.129597	-0.00866038	0.150008
0.899902	0.0634775	0.0269072	0.0903057	0.0898857	-0.0528969	-0.237899	0.149014	-0.0284773	0.143597
1	0.0505409	0.0421935	0.117706	0.0723209	-0.0520224	-0.220758	0.166125	-0.0452622	0.137845
1.1001	0.0367651	0.0577286	0.145107	0.055584	-0.0523628	-0.203109	0.180564	-0.0587192	0.132948
1.2002	0.0222368	0.0731884	0.171921	0.0397091	-0.054028	-0.185146	0.192074	-0.0686289	0.129094
1.2998	0.00709343	0.0882572	0.197589	0.0246449	-0.0571098	-0.167017	0.200501	-0.0748778	0.126416
1.3999	-0.00852108	0.10267	0.221547	0.0102959	-0.0616907	-0.148809	0.205855	-0.0775594	0.125089
1.5	-0.0244665	0.11621	0.243257	-0.00341988	-0.0678386	-0.130544	0.208311	-0.0768213	0.125202
1.6001	-0.0405645	0.128658	0.26229	-0.0166645	-0.0756306	-0.112163	0.208136	-0.0729432	0.126845
1.7002	-0.0566053	0.139848	0.27833	-0.029541	-0.0851173	-0.0935913	0.205635	-0.0662374	0.130027
1.7998	-0.0723591	0.14967	0.291133	-0.0421753	-0.0963263	-0.0746609	0.201167	-0.0570246	0.13473
1.8999	-0.0875978	0.158054	0.300552	-0.0546894	-0.109252	-0.0552059	0.195107	-0.0457502	0.140856
2	-0.102122	0.164972	0.306504	-0.0671711	-0.123861	-0.0350414	0.187839	-0.0327624	0.148223
2.1001	-0.115697	0.170386	0.309002	-0.0796814	-0.140087	-0.0139442	0.17973	-0.0185069	0.156581
2.2002	-0.128109	0.174315	0.308183	-0.092205	-0.157838	0.00821914	0.171104	-0.0033869	0.165637
2.2998	-0.139166	0.176783	0.304266	-0.10466	-0.176973	0.0315517	0.162238	0.0122642	0.175007
2.3999	-0.148678	0.177859	0.297528	-0.116928	-0.197267	0.0560459	0.153345	0.028146	0.184293
2.5	-0.156556	0.17763	0.28832	-0.128826	-0.218407	0.0816502	0.144572	0.0440338	0.193077
2.6001	-0.162717	0.176197	0.276996	-0.140083	-0.240054	0.108176	0.136016	0.0597317	0.200967
2.7002	-0.167061	0.173654	0.263932	-0.150448	-0.261841	0.135376	0.127705	0.0751327	0.207603
2.7998	-0.169514	0.170113	0.249533	-0.159575	-0.283386	0.16285	0.11964	0.090214	0.212616
2.8999	-0.169994	0.165664	0.23426	-0.167126	-0.304264	0.190157	0.111772	0.104942	0.215765
3	-0.168472	0.160389	0.218544	-0.172773	-0.32404	0.216732	0.104048	0.119357	0.216842
3.1001	-0.164973	0.154387	0.202779	-0.176243	-0.342283	0.242028	0.0964206	0.133453	0.215774
3.2002	-0.159499	0.147742	0.187371	-0.177265	-0.358621	0.265423	0.0888351	0.147244	0.212547
3.2998	-0.152084	0.140489	0.172697	-0.175682	-0.372775	0.286322	0.0812451	0.160794	0.20723
3.3999	-0.142776	0.132688	0.159065	-0.171387	-0.384538	0.304083	0.0735933	0.174102	0.199986
3.5	-0.13165	0.124362	0.146721	-0.164383	-0.39373	0.31815	0.0658663	0.187135	0.191075
3.6001	-0.118819	0.115504	0.135881	-0.154869	-0.400251	0.328053	0.0580768	0.199849	0.180795
3.7002	-0.104409	0.106091	0.126732	-0.143105	-0.404081	0.333409	0.0502284	0.212116	0.169451
3.7998	-0.0885973	0.0960549	0.119416	-0.12945	-0.405322	0.333987	0.0423665	0.22379	0.157451
3.8999	-0.0716209	0.0853318	0.114036	-0.114429	-0.404117	0.329657	0.0345881	0.234665	0.145132
4	-0.0536985	0.0738245	0.110637	-0.0985756	-0.400692	0.320483	0.0269619	0.244524	0.132834
4.1001	-0.0350857	0.0614676	0.109237	-0.082552	-0.395298	0.306603	0.0195574	0.253121	0.120825
4.2002	-0.0160503	0.0481932	0.109842	-0.0670643	-0.388184	0.288334	0.0124562	0.260154	0.109343
4.2998	0.0030899	0.0339784	0.112377	-0.0528221	-0.379599	0.266146	0.0057409	0.265411	0.0985687
4.3999	0.0220194	0.0188102	0.116751	-0.0405273	-0.369845	0.240582	-0.000521625	0.268661	0.0886147
4.5	0.0403671	0.00270053	0.122859	-0.0308151	-0.359192	0.212277	-0.00625246	0.269722	0.0795479
4.6001	0.0577497	-0.0142598	0.130561	-0.0242481	-0.3479	0.181904	-0.0113298	0.268504	0.0713456
4.7002	0.0738192	-0.0319392	0.139691	-0.021286	-0.336193	0.150208	-0.0156205	0.264911	0.0639524
4.7998	0.088213	-0.0501756	0.150025	-0.0222149	-0.324219	0.117899	-0.019021	0.258994	0.0572736
4.8999	0.100606	-0.0687179	0.161295	-0.0271912	-0.312093	0.0857376	-0.0214255	0.250823	0.051208
5	0.110704	-0.0872938	0.173221	-0.0361881	-0.299914	0.0543884	-0.0226819	0.240628	0.0456493
5.1001	0.118247	-0.105627	0.185502	-0.0490074	-0.287725	0.0245098	-0.0226469	0.22869	0.0404768
5.2002	0.123016	-0.123416	0.197799	-0.0652809	-0.275548	-0.00328217	-0.0212058	0.215341	0.0356121
5.2998	0.124881	-0.140327	0.209747	-0.0844879	-0.263373	-0.0284649	-0.0182518	0.201054	0.0309551
5.3999	0.123784	-0.156066	0.220978	-0.106039	-0.251219	-0.0505997	-0.0136856	0.186262	0.0264425
5.5	0.119734	-0.170351	0.231139	-0.129242	-0.23913	-0.0693317	-0.00741104	0.171498	0.0220265
5.6001	0.112782	-0.182952	0.239864	-0.153316	-0.227135	-0.0843712	0.000624018	0.157225	0.0177042
5.7002	0.103065	-0.193702	0.246834	-0.177425	-0.215228	-0.0955025	0.0104173	0.143904	0.013555
5.7998	0.0907631	-0.20246	0.251724	-0.200779	-0.203464	-0.10259	0.0219073	0.131996	0.00961304
5.8999	0.0761099	-0.209156	0.254286	-0.222641	-0.191933	-0.105527	0.0349932	0.121885	0.00597882
6	0.0594378	-0.213779	0.254337	-0.242367	-0.180753	-0.104364	0.0494909	0.113941	0.00273228
6.1001	0.0410957	-0.216402	0.251776	-0.25939	-0.170075	-0.0991207	0.0651371	0.10834	-2.38419e-05
6.2002	0.0214481	-0.217185	0.246575	-0.273258	-0.160074	-0.0899826	0.081628	0.105172	-0.00217628
6.2998	0.000906944	-0.216328	0.238787	-0.283636	-0.150924	-0.0770927	0.0986135	0.104483	-0.00359654
6.3999	-0.0200844	-0.21407	0.228571	-0.29034	-0.142764	-0.0607029	0.115707	0.106134	-0.0041306
6.5	-0.0410738	-0.21067	0.216132	-0.293402	-0.13574	-0.041143	0.13251	0.109978	-0.00364661
6.6001	-0.061636	-0.206417	0.201718	-0.292929	-0.129937	-0.01885	0.148628	0.115747	-0.00199294
6.7002	-0.0813875	-0.201606	0.185653	-0.289125	-0.125415	0.0057682	0.163698	0.123091	0.000947475
6.7998	-0.0999575	-0.196547	0.168309	-0.282309	-0.122211	0.0322288	0.177375	0.131659	0.00529432
6.8999	-0.11699	-0.191562	0.150059	-0.272867	-0.120305	0.0600246	0.189358	0.141026	0.0111742
7	-0.132166	-0.186933	0.131298	-0.261242	-0.11958	0.0886101	0.199377	0.150809	0.0186546
7.1001	-0.145194	-0.182902	0.112438	-0.247911	-0.119889	0.117421	0.207227	0.160597	0.0277717
7.2002	-0.155799	-0.179679	0.0938632	-0.233362	-0.121031	0.145909	0.212806	0.17001	0.0385163
7.2998	-0.163768	-0.177429	0.0759111	-0.218037	-0.122755	0.173533	0.216105	0.178727	0.050844
7.3999	-0.168956	-0.176287	0.0588835	-0.202349	-0.12481	0.199789	0.217228	0.186464	0.0646737
7.5	-0.171315	-0.17631	0.0430395	-0.186651	-0.126921	0.22424	0.216362	0.193	0.0798392
7.6001	-0.170826	-0.177481	0.0285977	-0.17128	-0.1288	0.246472	0.21373	0.198235	0.0961397
7.7002	-0.16754	-0.179732	0.015683	-0.156439	-0.130204	0.266152	0.209591	0.202125	0.113277
7.7998	-0.161578	-0.182963	0.00439757	-0.142324	-0.130908	0.283081	0.204265	0.204654	0.130966
7.8999	-0.153108	-0.18706	-0.00520814	-0.129084	-0.130721	0.297074	0.198115	0.205851	0.148778
8	-0.142363	-0.191871	-0.0131007	-0.116798	-0.129543	0.308073	0.191546	0.20584	0.166321
8.1001	-0.12961	-0.197207	-0.019305	-0.105513	-0.127353	0.316067	0.184932	0.204762	0.183152
8.2002	-0.115117	-0.20284	-0.0238756	-0.0952301	-0.124202	0.321116	0.178664	0.202763	0.198808
8.2998	-0.0992441	-0.208528	-0.0269109	-0.0859718	-0.12017	0.323342	0.173118	0.200004	0.212842
8.3999	-0.0823698	-0.214033	-0.0285068	-0.0776978	-0.115418	0.322951	0.168654	0.196573	0.22483
8.5	-0.064867	-0.219136	-0.0287882	-0.0703869	-0.110122	0.320137	0.165598	0.192635	0.234393
8.6001	-0.047121	-0.223656	-0.0278928	-0.0640583	-0.104485	0.315117	0.164215	0.188264	0.241194
8.7002	-0.029458	-0.227427	-0.0259865	-0.0587063	-0.098761	0.308115	0.164723	0.183497	0.245008
8.7998	-0.0121918	-0.230319	-0.0232683	-0.0543232	-0.0931801	0.299336	0.167269	0.178435	0.245667
8.8999	0.00441551	-0.232241	-0.0199129	-0.0509109	-0.0879497	0.289015	0.171904	0.173067	0.243047
9	0.0201626	-0.233133	-0.0161235	-0.0484943	-0.0832495	0.277323	0.178614	0.167397	0.237181
9.1001	0.0348969	-0.232995	-0.0120849	-0.0471134	-0.0792312	0.264422	0.187332	0.161408	0.228163
9.2002	0.0485067	-0.231867	-0.00800759	-0.0468235	-0.0760154	0.250409	0.197961	0.155024	0.216216
9.2998	0.0609512	-0.229807	-0.0040782	-0.0476398	-0.0736612	0.235373	0.210314	0.148248	0.201634
9.3999	0.0722332	-0.226966	-0.000450488	-0.049593	-0.0721726	0.219403	0.224072	0.141	0.184744
9.5	0.0824108	-0.223532	0.00272987	-0.0527058	-0.071526	0.202574	0.238844	0.133275	0.165964
9.6001	0.0915394	-0.219722	0.00535246	-0.0569401	-0.0716857	0.184929	0.254196	0.125064	0.145738
9.7002	0.0996904	-0.215804	0.00730388	-0.0622902	-0.0725612	0.166506	0.269657	0.11639	0.124509
9.7998	0.10691	-0.212072	0.00848087	-0.068697	-0.0740313	0.147318	0.284729	0.107304	0.102744
9.8999	0.113225	-0.208784	0.0088251	-0.0761166	-0.0759973	0.127392	0.298903	0.097829	0.0808847
10	0.118645	-0.206207	0.00829104	-0.0844097	-0.0783085	0.106787	0.311678	0.0880827	0.0593579
10.1001	0.123098	-0.204634	0.00691602	-0.0935287	-0.0808005	0.0855564	0.322569	0.0781637	0.0385532
10.2002	0.12651	-0.204334	0.00474983	-0.103325	-0.0833401	0.0637821	0.331166	0.0681629	0.0188522
10.2998	0.128744	-0.205513	0.00187141	-0.113615	-0.0857829	0.0415844	0.337115	0.0582443	0.000573397
10.3999	0.129651	-0.208307	-0.00162356	-0.124157	-0.0879606	0.0190968	0.340145	0.048515	-0.0159988
10.5	0.129084	-0.212774	-0.00561458	-0.134743	-0.0897583	-0.00355683	0.340088	0.0391094	-0.0306323
10.6001	0.126895	-0.21887	-0.0099572	-0.145172	-0.0910658	-0.0261875	0.336874	0.0301463	-0.0431089
10.7002	0.122935	-0.226485	-0.0144915	-0.155197	-0.0917601	-0.0486466	0.33057	0.021724	-0.0532589
10.7998	0.117078	-0.235437	-0.0190763	-0.164589	-0.0917339	-0.0707565	0.321391	0.0139293	-0.0609026
10.8999	0.109263	-0.245433	-0.0236105	-0.173117	-0.090908	-0.0923325	0.309666	0.00681661	-0.0658951
11	0.0995321	-0.256087	-0.0280122	-0.180532	-0.0892605	-0.113178	0.2958	0.000443159	-0.0680859
11.1001	0.0880022	-0.26699	-0.0322019	-0.186598	-0.0868091	-0.133058	0.2803	-0.00515162	-0.067342
11.2002	0.0748796	-0.277648	-0.0361507	-0.19109	-0.0835618	-0.151788	0.263745	-0.00995425	-0.063565
11.2998	0.0604973	-0.287528	-0.0398573	-0.193842	-0.0795569	-0.169155	0.246708	-0.0140235	-0.0566564
11.3999	0.0452452	-0.296122	-0.0433497	-0.194714	-0.07488	-0.184925	0.229805	-0.0174258	-0.046545
11.5	0.029604	-0.302943	-0.0467189	-0.193521	-0.0697121	-0.198928	0.213643	-0.0202324	-0.0332351
11.6001	0.0141077	-0.307549	-0.0500908	-0.190178	-0.0642432	-0.210975	0.19876	-0.0225625	-0.0168049
11.7002	-0.00069046	-0.309572	-0.0535812	-0.18466	-0.0586814	-0.22085	0.185638	-0.0245304	0.00264001
11.7998	-0.0142517	-0.308783	-0.0573233	-0.176971	-0.0532636	-0.228345	0.174675	-0.0262152	0.0248618
11.8999	-0.0260611	-0.305043	-0.0614693	-0.167181	-0.0482616	-0.233268	0.166165	-0.0277495	0.0495381
12	-0.035656	-0.298347	-0.0661742	-0.155413	-0.0439238	-0.235431	0.160293	-0.0292471	0.0762391
12.1001	-0.0426407	-0.288783	-0.0715616	-0.141809	-0.0405015	-0.234647	0.157088	-0.0308034	0.104431
12.2002	-0.0467224	-0.276583	-0.0777122	-0.12656	-0.0382098	-0.230728	0.156457	-0.0324755	0.133486
12.2998	-0.0477486	-0.26209	-0.0846481	-0.109901	-0.0372347	-0.223533	0.158225	-0.0343078	0.162713
12.3999	-0.0456429	-0.245725	-0.0923672	-0.0920982	-0.0376925	-0.212911	0.162166	-0.0363998	0.191304
12.5	-0.0404387	-0.227994	-0.100803	-0.0734501	-0.0396661	-0.198732	0.167956	-0.0387163	0.218463
12.6001	-0.0322771	-0.209415	-0.109854	-0.0542946	-0.0431632	-0.180912	0.175178	-0.0412553	0.243326
12.7002	-0.0214062	-0.190519	-0.119364	-0.0349979	-0.048119	-0.15941	0.183421	-0.0439717	0.26508
12.7998	-0.00811005	-0.171826	-0.12913	-0.0159473	-0.0544328	-0.13426	0.192288	-0.0467927	0.282965
12.8999	0.00727463	-0.153804	-0.138899	0.00249481	-0.0619239	-0.105556	0.201415	-0.0496712	0.296292
13	0.0243664	-0.136874	-0.148426	0.0200272	-0.0703625	-0.0734612	0.210478	-0.0525115	0.30454
13.1001	0.0427723	-0.121343	-0.157482	0.0363579	-0.0795249	-0.0382668	0.219233	-0.0552367	0.307292
13.2002	0.0621109	-0.10741	-0.165855	0.0512409	-0.0890969	-0.000342946	0.227536	-0.0577921	0.304317
13.2998	0.0820074	-0.0951608	-0.173399	0.0644932	-0.0987682	0.0398487	0.235325	-0.060061	0.29557
13.3999	0.102151	-0.0845455	-0.180002	0.0759602	-0.108235	0.0817589	0.242588	-0.0620314	0.281183
13.5	0.122233	-0.0754219	-0.185601	0.0856342	-0.117238	0.124728	0.249364	-0.0636588	0.261491
13.6001	0.141989	-0.0675705	-0.190154	0.0935345	-0.125531	0.168	0.255756	-0.0649064	0.236951
13.7002	0.161205	-0.0606976	-0.193705	0.0997791	-0.132905	0.210778	0.261915	-0.0657422	0.208178
13.7998	0.179683	-0.0544102	-0.196378	0.104589	-0.1392	0.252203	0.268041	-0.0660795	0.17595
13.8999	0.197227	-0.0482857	-0.198323	0.108255	-0.14435	0.291378	0.274361	-0.0659063	0.141107
14	0.213656	-0.0419059	-0.199744	0.111128	-0.148362	0.327446	0.281058	-0.0651557	0.104605
14.1001	0.228837	-0.0348775	-0.20083	0.113565	-0.15126	0.359555	0.288273	-0.063777	0.06742
14.2002	0.242667	-0.0268354	-0.201759	0.115957	-0.153103	0.386979	0.296072	-0.0617247	0.0304964
14.2998	0.255039	-0.017418	-0.202687	0.118729	-0.154014	0.409035	0.304445	-0.0589147	-0.00527024
14.3999	0.265841	-0.00635354	-0.203712	0.122305	-0.154166	0.425204	0.313293	-0.0552716	-0.0390508
14.5	0.27502	0.00652658	-0.20487	0.127134	-0.153751	0.435088	0.322472	-0.0507158	-0.0700834
14.6001	0.282537	0.0212959	-0.206143	0.133583	-0.152963	0.438488	0.331808	-0.0451582	-0.0977314
14.7002	0.28841	0.0379154	-0.207474	0.141935	-0.151997	0.435372	0.34105	-0.0385344	-0.121472
14.7998	0.292665	0.0562524	-0.208758	0.152424	-0.151004	0.425894	0.349897	-0.0307271	-0.140926
14.8999	0.295357	0.0760774	-0.209847	0.16515	-0.150129	0.410368	0.358011	-0.0216864	-0.155822
15	0.296597	0.097079	-0.210539	0.180147	-0.149507	0.389279	0.365076	-0.0113526	-0.166075
15.1001	0.296556	0.118884	-0.210593	0.197319	-0.149202	0.363274	0.370797	0.0002662	-0.171749
15.2002	0.29541	0.141072	-0.209744	0.216442	-0.149212	0.333077	0.374932	0.0131503	-0.173018
15.2998	0.293318	0.163206	-0.207749	0.237192	-0.149509	0.299519	0.37731	0.027253	-0.170162
15.3999	0.290473	0.184863	-0.204451	0.25914	-0.150033	0.263478	0.37783	0.0424586	-0.163507
15.5	0.287094	0.20558	-0.199723	0.281744	-0.150702	0.225878	0.376473	0.058646	-0.153483
15.6001	0.283397	0.224954	-0.193511	0.304436	-0.151402	0.187621	0.373341	0.0755823	-0.140548
15.7002	0.279531	0.242621	-0.185867	0.326546	-0.15198	0.149571	0.368612	0.0929897	-0.125237
15.7998	0.275609	0.2583	-0.176916	0.347416	-0.152286	0.112507	0.362531	0.110623	-0.10807
15.8999	0.271699	0.271792	-0.166861	0.366386	-0.152183	0.0771507	0.355418	0.128123	-0.0895028
16	0.267871	0.282945	-0.155963	0.382816	-0.151546	0.044043	0.347629	0.145164	-0.0699902
16.1001	0.264131	0.291693	-0.144591	0.396156	-0.150258	0.013615	0.339561	0.161377	-0.049943
16.2002	0.260458	0.298066	-0.133148	0.405905	-0.148227	-0.0138107	0.331644	0.176372	-0.0296819
16.2998	0.25682	0.30217	-0.122074	0.411707	-0.145401	-0.0380779	0.324277	0.189798	-0.00942755
16.3999	0.253148	0.304153	-0.111821	0.413361	-0.141756	-0.0591618	0.317741	0.20128	0.0106518
16.5	0.249358	0.304255	-0.102809	0.41081	-0.137337	-0.0771633	0.312262	0.21052	0.0305021
16.6001	0.245373	0.302765	-0.0954045	0.404133	-0.132233	-0.0922943	0.308027	0.217267	0.0501451
16.7002	0.241115	0.29999	-0.0899306	0.393557	-0.126548	-0.104843	0.305141	0.221341	0.0696306
16.7998	0.236535	0.296254	-0.0866491	0.379412	-0.120465	-0.1152	0.303592	0.222649	0.0891378
16.8999	0.231635	0.291889	-0.0857087	0.362209	-0.114203	-0.123821	0.303276	0.221126	0.108877
17	0.22641	0.287223	-0.087172	0.342522	-0.107999	-0.131189	0.304016	0.216849	0.129048
17.1001	0.220863	0.282619	-0.0909987	0.320963	-0.102045	-0.137802	0.305529	0.209924	0.149903
17.2002	0.215022	0.278377	-0.0970092	0.298222	-0.0965752	-0.144149	0.307468	0.200573	0.171605
17.2998	0.208971	0.27478	-0.10492	0.274912	-0.0918259	-0.150671	0.309474	0.189156	0.194335
17.3999	0.202785	0.272081	-0.114377	0.251614	-0.0880117	-0.157821	0.311211	0.17608	0.218195
17.5	0.196524	0.270501	-0.124971	0.228806	-0.0852999	-0.165956	0.312374	0.161832	0.243201
17.6001	0.190223	0.270228	-0.136248	0.206856	-0.0838303	-0.175363	0.312681	0.146895	0.269297
17.7002	0.183903	0.271371	-0.147671	0.185997	-0.0836982	-0.186246	0.311932	0.131792	0.296321
17.7998	0.177553	0.273986	-0.158653	0.166317	-0.0849318	-0.198738	0.30999	0.117104	0.324014
17.8999	0.171161	0.278057	-0.168656	0.147793	-0.0875272	-0.212865	0.306807	0.103347	0.351994
18	0.16467	0.283521	-0.177167	0.130239	-0.0914582	-0.228576	0.302407	0.0910874	0.379805
18.1001	0.158002	0.290264	-0.18371	0.113403	-0.0966171	-0.245763	0.296934	0.0807984	0.406924
18.2002	0.151035	0.298114	-0.187881	0.0969353	-0.10285	-0.264225	0.290602	0.0729061	0.432755
18.2998	0.143623	0.306814	-0.189348	0.0803795	-0.109975	-0.283725	0.283676	0.0677694	0.456713
18.3999	0.135616	0.316067	-0.18789	0.0633221	-0.117817	-0.303974	0.276424	0.0656013	0.478191
18.5	0.12684	0.325545	-0.183371	0.0453548	-0.126148	-0.324659	0.269127	0.0666385	0.496604
18.6001	0.117119	0.334859	-0.175776	0.0261478	-0.134761	-0.345388	0.262078	0.0709401	0.511416
18.7002	0.106315	0.343654	-0.16518	0.00544548	-0.143505	-0.365787	0.255547	0.0784421	0.522188
18.7998	0.0943003	0.351577	-0.151769	-0.0168667	-0.15225	-0.385465	0.249704	0.0890379	0.528592
18.8999	0.0809736	0.358308	-0.135824	-0.0408096	-0.160886	-0.404079	0.244646	0.102456	0.530383
19	0.0662594	0.363539	-0.117692	-0.0662727	-0.169317	-0.421365	0.240391	0.118424	0.527467
19.1001	0.0501566	0.367016	-0.0978166	-0.0929852	-0.177501	-0.437028	0.236874	0.136518	0.51993
19.2002	0.0326557	0.368499	-0.0766753	-0.120543	-0.185461	-0.450857	0.233952	0.15625	0.50798
19.2998	0.0138292	0.367846	-0.0547967	-0.148479	-0.193247	-0.462671	0.231425	0.177104	0.491956
19.3999	-0.00621223	0.364997	-0.032717	-0.176262	-0.20092	-0.472297	0.22904	0.198464	0.472333
19.5	-0.0272989	0.359942	-0.0109699	-0.203371	-0.20857	-0.479675	0.22648	0.219766	0.449697
19.6001	-0.0492163	0.352722	0.00996975	-0.229269	-0.216272	-0.484731	0.223439	0.240389	0.424736
19.7002	-0.0716801	0.343469	0.029657	-0.253407	-0.224104	-0.487463	0.219618	0.259768	0.398151
19.7998	-0.0943613	0.332373	0.047738	-0.275293	-0.232089	-0.487909	0.214706	0.277359	0.370692
19.8999	-0.116926	0.319631	0.0639422	-0.294546	-0.240227	-0.48611	0.208439	0.292629	0.343183
20	-0.139027	0.305459	0.0780788	-0.310837	-0.248478	-0.482084	0.200665	0.305223	0.316387
20.1001	-0.160319	0.290113	0.090085	-0.32398	-0.256768	-0.475912	0.191333	0.314782	0.291046
20.2002	-0.180477	0.273872	0.0999706	-0.333914	-0.264995	-0.467628	0.180478	0.321102	0.2678
20.2998	-0.19913	0.256993	0.107885	-0.340691	-0.273013	-0.457262	0.168208	0.324096	0.247216
20.3999	-0.215918	0.239781	0.114039	-0.34446	-0.280587	-0.444837	0.154689	0.323812	0.229752
20.5	-0.230558	0.222496	0.118688	-0.345421	-0.287473	-0.430338	0.140172	0.320416	0.215764
20.6001	-0.242785	0.205408	0.122133	-0.343864	-0.293415	-0.413744	0.125027	0.314167	0.205512
20.7002	-0.252417	0.18877	0.12471	-0.340101	-0.298143	-0.395053	0.109624	0.305444	0.199111
20.7998	-0.259354	0.172816	0.126753	-0.334452	-0.301345	-0.374204	0.0943512	0.294743	0.196556
20.8999	-0.263525	0.157811	0.128541	-0.327295	-0.302745	-0.351131	0.0795939	0.282562	0.197709
21	-0.264915	0.144005	0.130374	-0.318958	-0.302096	-0.325752	0.0657488	0.269507	0.202324
21.1001	-0.263598	0.13163	0.13249	-0.309769	-0.299173	-0.298013	0.0531759	0.256178	0.210099
21.2002	-0.259737	0.120881	0.135058	-0.300041	-0.29382	-0.267906	0.0421872	0.243144	0.220617
21.2998	-0.253548	0.111929	0.13816	-0.290022	-0.285933	-0.23542	0.0330367	0.230958	0.233443
21.3999	-0.245275	0.104933	0.141755	-0.279949	-0.275452	-0.200584	0.0259463	0.220065	0.248058
21.5	-0.235234	0.100003	0.145756	-0.269972	-0.262376	-0.163482	0.0210404	0.210895	0.263936
21.6001	-0.223784	0.097245	0.149976	-0.260176	-0.246834	-0.12426	0.0183397	0.203682	0.28052
21.7002	-0.21132	0.0967021	0.154192	-0.250677	-0.229011	-0.0831371	0.0178206	0.198535	0.297284
21.7998	-0.19825	0.0983317	0.158163	-0.241541	-0.209188	-0.0403439	0.0193829	0.195491	0.313668
21.8999	-0.18498	0.102024	0.161589	-0.232792	-0.187683	0.00379981	0.0228358	0.194418	0.32919
22	-0.171909	0.107621	0.164161	-0.224403	-0.164872	0.048941	0.0279382	0.195137	0.343396
22.1001	-0.159427	0.114919	0.165573	-0.216314	-0.141183	0.0946182	0.0343959	0.197362	0.355901
22.2002	-0.147913	0.123613	0.165563	-0.208443	-0.117137	0.140379	0.0418952	0.200732	0.366356
22.2998	-0.137695	0.133339	0.163913	-0.200741	-0.0932612	0.185751	0.0501107	0.204881	0.374478
22.3999	-0.129037	0.143729	0.160459	-0.19319	-0.0700778	0.230263	0.0586952	0.209348	0.380054
22.5	-0.122112	0.154387	0.155078	-0.185734	-0.0481218	0.273446	0.0672767	0.213759	0.382958
22.6001	-0.117062	0.16489	0.147737	-0.178286	-0.0279249	0.314846	0.07549	0.217671	0.383126
22.7002	-0.113969	0.174836	0.138475	-0.170797	-0.00995008	0.354046	0.0830166	0.220701	0.38057
22.7998	-0.112838	0.183864	0.127413	-0.16321	0.00541838	0.3907	0.0895665	0.222585	0.375375
22.8999	-0.113593	0.191613	0.114734	-0.155527	0.0179072	0.424555	0.0948869	0.223042	0.367661
23	-0.11613	0.197801	0.100667	-0.147797	0.0273305	0.455449	0.0987721	0.22195	0.357643
23.1001	-0.120253	0.202183	0.0854516	-0.140062	0.0335809	0.483307	0.101067	0.219211	0.345592
23.2002	-0.125706	0.204597	0.0693267	-0.13242	0.0366679	0.508147	0.101679	0.21473	0.331821
23.2998	-0.13219	0.204967	0.0526029	-0.125013	0.0367313	0.530074	0.100568	0.208557	0.316699
23.3999	-0.139395	0.203277	0.0355813	-0.118017	0.0340124	0.549254	0.0977561	0.200716	0.300594
23.5	-0.147021	0.199584	0.0185511	-0.111641	0.0288459	0.56597	0.0933343	0.191327	0.283895
23.6001	-0.154756	0.193984	0.00180321	-0.106131	0.0216294	0.580561	0.08743	0.180508	0.267024
23.7002	-0.16226	0.186623	-0.0143742	-0.101746	0.0128642	0.59335	0.0802105	0.168412	0.250403
23.7998	-0.169233	0.177681	-0.0297389	-0.0987473	0.00308617	0.604727	0.0718501	0.155232	0.234428
23.8999	-0.175397	0.167347	-0.0441034	-0.0973759	-0.00717155	0.615069	0.062518	0.141116	0.219479
24	-0.180479	0.155804	-0.0573166	-0.0978508	-0.0174131	0.62473	0.0523988	0.126297	0.205873
24.1001	-0.184277	0.143254	-0.0692481	-0.10038	-0.0271472	0.63402	0.0416979	0.110959	0.193897
24.2002	-0.186641	0.129866	-0.0797922	-0.105125	-0.0359468	0.643135	0.0305663	0.0953179	0.183732
24.2998	-0.187465	0.115812	-0.0888524	-0.112188	-0.0434608	0.652239	0.019124	0.0796075	0.175484
24.3999	-0.18668	0.101216	-0.0963648	-0.121567	-0.0494346	0.661377	0.0075229	0.0640394	0.169215
24.5	-0.184277	0.0861592	-0.102285	-0.133234	-0.0536923	0.670517	-0.00413149	0.0488604	0.164845
24.6001	-0.180297	0.0707372	-0.106596	-0.147015	-0.0561327	0.679497	-0.0157868	0.0342565	0.162238
24.7002	-0.174869	0.0550452	-0.109292	-0.162729	-0.0567502	0.688069	-0.0273967	0.0204184	0.161183
24.7998	-0.168159	0.0391301	-0.110348	-0.180098	-0.0556177	0.695877	-0.0389103	0.00750929	0.16135
24.8999	-0.160425	0.0230788	-0.109802	-0.198744	-0.0529055	0.702525	-0.0503087	-0.00433598	0.162401
25	-0.151929	0.00700055	-0.107687	-0.218208	-0.0488366	0.707581	-0.0615754	-0.0150184	0.163913
25.1001	-0.142998	-0.008988	-0.104038	-0.237991	-0.0436992	0.71056	-0.0726515	-0.0244826	0.165437
25.2002	-0.133994	-0.0247601	-0.0989258	-0.25758	-0.0377983	0.711016	-0.0834329	-0.0327556	0.166539
25.2998	-0.125359	-0.0401554	-0.092435	-0.276463	-0.0314354	0.708504	-0.0937828	-0.0399126	0.166788
25.3999	-0.117506	-0.0549985	-0.0846597	-0.294121	-0.0249252	0.702673	-0.10357	-0.046075	0.165842
25.5	-0.110817	-0.0690787	-0.075684	-0.310009	-0.0185813	0.693259	-0.112662	-0.0513643	0.163377
25.6001	-0.10564	-0.0821805	-0.0656473	-0.323675	-0.0126576	0.680079	-0.120881	-0.0559228	0.159151
25.7002	-0.102286	-0.0940578	-0.0547158	-0.334696	-0.00735084	0.663115	-0.128045	-0.0599476	0.153032
25.7998	-0.101005	-0.104473	-0.0430696	-0.342728	-0.00281993	0.642474	-0.133946	-0.0635756	0.144995
25.8999	-0.101953	-0.11322	-0.0308927	-0.347504	0.000833592	0.618372	-0.138378	-0.0669791	0.135128
26	-0.105204	-0.120101	-0.018439	-0.348906	0.00351675	0.591193	-0.141156	-0.070294	0.123588
26.1001	-0.110719	-0.124938	-0.00599337	-0.346933	0.00516327	0.561407	-0.142114	-0.073586	0.110627
26.2002	-0.118342	-0.127623	0.00613787	-0.341671	0.00574311	0.529627	-0.141082	-0.0769168	0.0965629
26.2998	-0.1278	-0.128126	0.0176546	-0.333277	0.00525721	0.496483	-0.137919	-0.0802091	0.0817761
26.3999	-0.138725	-0.126445	0.0282423	-0.322042	0.00374754	0.462647	-0.132531	-0.0834556	0.0666978
26.5	-0.150644	-0.122607	0.0375789	-0.308342	0.001278	0.428816	-0.124852	-0.0865575	0.0517523
26.6001	-0.163037	-0.116686	0.0453444	-0.292683	-0.00209562	0.395659	-0.114886	-0.0893852	0.0373769
26.7002	-0.175357	-0.108801	0.0512333	-0.275623	-0.00631134	0.363749	-0.102685	-0.091802	0.0239534
26.7998	-0.18702	-0.0991056	0.054967	-0.257765	-0.011289	0.333607	-0.0882849	-0.0935953	0.0118129
26.8999	-0.197464	-0.0878218	0.0563037	-0.239716	-0.0169553	0.305634	-0.0717427	-0.0947006	0.00120497
27	-0.206165	-0.0751801	0.0550634	-0.222122	-0.0232577	0.280093	-0.0531314	-0.0950131	-0.00767922
27.1001	-0.212679	-0.0614378	0.051103	-0.205629	-0.0301184	0.257119	-0.0325688	-0.0944649	-0.0147493
27.2002	-0.216649	-0.0468296	0.0443495	-0.190863	-0.037455	0.236695	-0.0101872	-0.0930824	-0.0199499
27.2998	-0.217855	-0.0315987	0.0348255	-0.178402	-0.0451745	0.218676	0.0138761	-0.0908511	-0.0233326
27.3999	-0.2162	-0.0159738	0.0226352	-0.168726	-0.0531925	0.202799	0.0394459	-0.0879237	-0.0249934
27.5	-0.211728	-0.00015346	0.00796371	-0.162258	-0.0614256	0.188708	0.0663401	-0.0844257	-0.0250778
27.6001	-0.204631	0.0156602	-0.00891445	-0.159315	-0.0698127	0.176011	0.094365	-0.0806094	-0.0237877
27.7002	-0.195189	0.0312611	-0.0276618	-0.160154	-0.0782894	0.164231	0.123339	-0.0767756	-0.0213103
27.7998	-0.183774	0.0464596	-0.0479089	-0.164917	-0.086791	0.152882	0.153044	-0.0731863	-0.017873
27.8999	-0.170801	0.0610565	-0.0692158	-0.173655	-0.0952353	0.141463	0.183208	-0.0701736	-0.0137405
28	-0.156759	0.0748684	-0.0910982	-0.186293	-0.103531	0.129532	0.213524	-0.0680405	-0.00911665
28.1001	-0.142157	0.0877075	-0.113076	-0.202654	-0.111596	0.1167	0.243674	-0.0670777	-0.00419998
28.2002	-0.127508	0.099406	-0.134664	-0.222445	-0.119409	0.102646	0.2733	-0.067586	0.000864029
28.2998	-0.113283	0.109794	-0.155391	-0.245247	-0.126968	0.0871128	0.302044	-0.0697632	0.00593281
28.3999	-0.0999022	0.118683	-0.174798	-0.270594	-0.13429	0.0699448	0.329563	-0.0738223	0.0109158
28.5	-0.0876703	0.125922	-0.192492	-0.297956	-0.141385	0.0510525	0.355497	-0.0798614	0.0157375
28.6001	-0.0767794	0.131382	-0.208157	-0.326714	-0.148263	0.0304512	0.379484	-0.087991	0.0203543
28.7002	-0.0673532	0.134914	-0.221537	-0.356205	-0.154974	0.00824394	0.401214	-0.0982435	0.0247412
28.7998	-0.0594139	0.136452	-0.232426	-0.385767	-0.161613	-0.0154396	0.420418	-0.110514	0.0288825
28.8999	-0.0528793	0.135936	-0.240699	-0.414694	-0.168256	-0.0404011	0.436878	-0.124665	0.0328002
29	-0.0476255	0.133346	-0.24633	-0.442314	-0.174953	-0.0664211	0.450417	-0.140527	0.036514
29.1001	-0.0434198	0.128722	-0.249377	-0.46797	-0.181749	-0.0932404	0.460966	-0.15788	0.0400479
29.2002	-0.04	0.122193	-0.24995	-0.491013	-0.188663	-0.120584	0.468528	-0.176462	0.0434403
29.2998	-0.037056	0.113941	-0.248213	-0.510876	-0.195697	-0.148222	0.473203	-0.195931	0.0467184
29.3999	-0.0343266	0.104165	-0.244389	-0.527111	-0.202821	-0.175903	0.475164	-0.215978	0.0499442
29.5	-0.0315657	0.0931296	-0.238731	-0.539373	-0.209954	-0.203441	0.474682	-0.236283	0.0531392
29.6001	-0.0285263	0.0811226	-0.231486	-0.547445	-0.216975	-0.230623	0.4721	-0.256528	0.0563884
29.7002	-0.0249681	0.0684424	-0.222962	-0.551189	-0.22374	-0.257286	0.467808	-0.276426	0.0597222
29.7998	-0.0207624	0.0554198	-0.213462	-0.550627	-0.230096	-0.283304	0.462242	-0.295638	0.0632215
29.8999	-0.0158358	0.0424221	-0.203299	-0.545921	-0.235872	-0.308588	0.455841	-0.313927	0.0669279
30	-0.0101671	0.0297886	-0.192784	-0.537329	-0.240891	-0.333068	0.44903	-0.331016	0.0708537
30.1001	-0.00375938	0.0178226	-0.182229	-0.525227	-0.244955	-0.356704	0.442252	-0.346729	0.0750542
30.2002	0.00335789	0.0068065	-0.171905	-0.51005	-0.247872	-0.379465	0.435912	-0.360943	0.0795808
30.2998	0.0111132	-0.00303467	-0.162031	-0.492294	-0.249499	-0.401329	0.430351	-0.373508	0.0844696
30.3999	0.0194101	-0.0115424	-0.152811	-0.472509	-0.24968	-0.422289	0.425856	-0.384342	0.0897121
30.5	0.0281162	-0.0185979	-0.144407	-0.451292	-0.248279	-0.442291	0.422635	-0.393358	0.0952957
30.6001	0.0371342	-0.0241447	-0.136969	-0.429237	-0.245211	-0.461269	0.42083	-0.400508	0.101177
30.7002	0.0464077	-0.0282076	-0.130629	-0.406912	-0.240417	-0.479171	0.420515	-0.405795	0.107306
30.7998	0.0558825	-0.0308676	-0.125463	-0.384748	-0.233891	-0.495956	0.421688	-0.409264	0.113616
30.8999	0.0655088	-0.0322323	-0.121502	-0.363173	-0.225697	-0.511537	0.424306	-0.410971	0.120018
31	0.0752249	-0.0324728	-0.118723	-0.342482	-0.215884	-0.525835	0.428269	-0.410932	0.126425
31.1001	0.08494	-0.0318017	-0.117077	-0.322931	-0.204508	-0.538755	0.433416	-0.409246	0.132703
31.2002	0.0945759	-0.0304362	-0.116486	-0.304649	-0.191631	-0.550216	0.439566	-0.406004	0.138752
31.2998	0.104062	-0.0286159	-0.116825	-0.287689	-0.177334	-0.560123	0.446534	-0.401308	0.144443
31.3999	0.113337	-0.0265951	-0.117949	-0.271994	-0.161734	-0.568386	0.454109	-0.395329	0.14968
31.5	0.122269	-0.0246069	-0.119694	-0.257465	-0.144967	-0.574951	0.462074	-0.388209	0.154391
31.6001	0.130683	-0.022879	-0.121861	-0.243929	-0.12718	-0.579795	0.470238	-0.380142	0.158475
31.7002	0.138379	-0.0215946	-0.124242	-0.231161	-0.108514	-0.582855	0.478399	-0.371337	0.161865
31.7998	0.145209	-0.0208939	-0.126624	-0.218935	-0.089107	-0.584118	0.486351	-0.361986	0.164476
31.8999	0.150984	-0.0208853	-0.128802	-0.207037	-0.0691218	-0.583587	0.493904	-0.352376	0.166269
32	0.15553	-0.0216208	-0.130611	-0.195227	-0.0487222	-0.581251	0.500862	-0.342755	0.167253
32.1001	0.158681	-0.0230773	-0.131926	-0.183277	-0.0281147	-0.577121	0.507034	-0.333405	0.167408
32.2002	0.160329	-0.0251946	-0.132646	-0.170984	-0.00754015	-0.571218	0.512257	-0.324547	0.166758
32.2998	0.160419	-0.0278241	-0.1327	-0.158192	0.0127245	-0.563556	0.516375	-0.316325	0.165296
32.3999	0.158987	-0.0307806	-0.132063	-0.144821	0.0323974	-0.554151	0.519191	-0.308932	0.163057
32.5	0.15615	-0.0338268	-0.130773	-0.130751	0.051189	-0.54297	0.520517	-0.302475	0.160086
32.6001	0.152076	-0.0367204	-0.128945	-0.115959	0.0687734	-0.529993	0.520186	-0.296997	0.156375
32.7002	0.146976	-0.0391983	-0.126744	-0.10042	0.084797	-0.515159	0.518036	-0.292523	0.151961
32.7998	0.141141	-0.0409542	-0.124348	-0.0841961	0.0989533	-0.498432	0.513931	-0.28894	0.14685
32.8999	0.134943	-0.0416924	-0.121952	-0.0673161	0.110963	-0.479763	0.50777	-0.286121	0.141027
33	0.128781	-0.0411404	-0.11976	-0.0498486	0.120563	-0.459146	0.499474	-0.283813	0.134477
33.1001	0.123072	-0.039074	-0.118005	-0.0318832	0.127521	-0.43655	0.48897	-0.281775	0.127171
33.2002	0.118233	-0.0353053	-0.116885	-0.0135002	0.131676	-0.411981	0.476213	-0.27973	0.119089
33.2998	0.114641	-0.029716	-0.11655	0.00524902	0.132932	-0.385482	0.461212	-0.277363	0.110194
33.3999	0.112613	-0.0222116	-0.117112	0.0242748	0.131267	-0.357118	0.44407	-0.274433	0.100459
33.5	0.11239	-0.0127676	-0.118635	0.04352	0.126742	-0.327003	0.42493	-0.270631	0.0898676
33.6001	0.114082	-0.00141524	-0.121132	0.0628853	0.119478	-0.29524	0.403972	-0.265743	0.0784276
33.7002	0.117728	0.0117224	-0.124568	0.0822964	0.109681	-0.262016	0.381418	-0.25959	0.0661888
33.7998	0.123281	0.0264726	-0.128857	0.101665	0.0976873	-0.227605	0.357545	-0.252073	0.0532017
33.8999	0.130606	0.0426536	-0.133884	0.120884	0.0838929	-0.192245	0.332674	-0.243175	0.0395589
34	0.139467	0.0600684	-0.139517	0.139896	0.068739	-0.156225	0.30718	-0.232955	0.0253999
34.1001	0.149574	0.0784722	-0.145578	0.158604	0.0526906	-0.11988	0.28146	-0.221549	0.0109198
34.2002	0.160564	0.0976504	-0.151928	0.176903	0.0362287	-0.0835434	0.255883	-0.209143	-0.00366259
34.2998	0.172026	0.117391	-0.158396	0.194653	0.0198699	-0.0475498	0.23085	-0.195956	-0.0180781
34.3999	0.183533	0.137466	-0.164849	0.21172	0.00411423	-0.0122582	0.20676	-0.182286	-0.0320776
34.5	0.194688	0.157624	-0.171159	0.227974	-0.0105733	0.0220016	0.183994	-0.168405	-0.0453546
34.6001	0.205153	0.177671	-0.177238	0.243267	-0.0238136	0.0548805	0.162886	-0.154628	-0.0576212
34.7002	0.214654	0.197412	-0.183053	0.257463	-0.035304	0.0860981	0.143714	-0.141238	-0.0685751
34.7998	0.222964	0.21669	-0.188575	0.27042	-0.0448488	0.11542	0.126699	-0.128461	-0.0779266
34.8999	0.229941	0.235388	-0.193765	0.281998	-0.0523318	0.142668	0.112015	-0.116476	-0.0854106
35	0.235529	0.253392	-0.198637	0.292091	-0.0577349	0.1677	0.0997499	-0.105392	-0.0908353
35.1001	0.239756	0.270594	-0.203159	0.300631	-0.0611719	0.19043	0.0899358	-0.0953037	-0.0940921
35.2002	0.242717	0.286871	-0.207335	0.307562	-0.062899	0.210858	0.0825339	-0.0862235	-0.095118
35.2998	0.244599	0.302109	-0.211199	0.312843	-0.0632767	0.229023	0.0774196	-0.0780813	-0.0939026
35.3999	0.245604	0.316174	-0.214745	0.316475	-0.0627236	0.24503	0.0744327	-0.0708197	-0.0905654
35.5	0.245985	0.328964	-0.218002	0.31851	-0.0617227	0.25906	0.0733646	-0.0642702	-0.085283
35.6001	0.246026	0.340346	-0.22096	0.318993	-0.0607776	0.271332	0.0739738	-0.0582204	-0.0782588
35.7002	0.246028	0.350184	-0.223611	0.31806	-0.060389	0.282174	0.0759914	-0.0524919	-0.0697875
35.7998	0.246235	0.358396	-0.225902	0.315821	-0.0610513	0.291909	0.0791743	-0.0468843	-0.0601552
35.8999	0.246864	0.36491	-0.227767	0.312412	-0.0632118	0.300942	0.0832819	-0.0412411	-0.0497167
36	0.24811	0.369671	-0.229189	0.307957	-0.0672621	0.309622	0.0880737	-0.0353605	-0.0387831
36.1001	0.250122	0.372638	-0.230171	0.30262	-0.0734371	0.318398	0.0933396	-0.0291285	-0.0276968
36.2002	0.252991	0.373751	-0.230719	0.296614	-0.0818404	0.327647	0.098945	-0.0224532	-0.0167432
36.2998	0.2567	0.372984	-0.230836	0.290087	-0.0924749	0.337748	0.104787	-0.0152286	-0.00613928
36.3999	0.261191	0.370387	-0.230519	0.283234	-0.105236	0.349053	0.110796	-0.00745159	0.00392866
36.5	0.266382	0.366066	-0.229736	0.27622	-0.119898	0.361836	0.116946	0.000913396	0.0133743
36.6001	0.272133	0.360157	-0.228439	0.269241	-0.136106	0.376299	0.123254	0.00979795	0.0221853
36.7002	0.278292	0.35285	-0.226589	0.262476	-0.153404	0.39262	0.129757	0.0191147	0.0304124
36.7998	0.284628	0.344365	-0.224154	0.256113	-0.17129	0.410849	0.136527	0.0287321	0.0381851
36.8999	0.290895	0.334993	-0.221094	0.250326	-0.189219	0.430968	0.143648	0.0384877	0.0456698
37	0.296859	0.325031	-0.217338	0.245281	-0.206651	0.45287	0.151166	0.0482406	0.0530851
37.1001	0.30225	0.314803	-0.212789	0.241177	-0.223087	0.476374	0.159117	0.0577507	0.0606632
37.2002	0.306877	0.304636	-0.207333	0.238121	-0.238052	0.501244	0.167535	0.0667928	0.0686502
37.2998	0.310532	0.294894	-0.20085	0.236298	-0.251154	0.52714	0.176418	0.075167	0.0772929
37.3999	0.312992	0.285954	-0.193261	0.235825	-0.262114	0.553666	0.185756	0.0826178	0.0868099
37.5	0.314097	0.278159	-0.184514	0.236814	-0.270736	0.580368	0.1955	0.0889427	0.0974102
37.6001	0.313709	0.271841	-0.174614	0.239353	-0.276907	0.606778	0.205551	0.09392	0.109197
37.7002	0.311715	0.267279	-0.163598	0.243511	-0.280605	0.632447	0.215761	0.0973724	0.122215
37.7998	0.308091	0.264699	-0.151536	0.249283	-0.281907	0.656886	0.225955	0.0991358	0.13642
37.8999	0.302864	0.264238	-0.138528	0.256666	-0.280991	0.679688	0.235973	0.0991141	0.151721
38	0.296104	0.265977	-0.124735	0.265556	-0.278115	0.700459	0.245642	0.097215	0.167999
38.1001	0.287909	0.269914	-0.110406	0.275835	-0.273553	0.718905	0.254751	0.0933992	0.185001
38.2002	0.278399	0.276003	-0.0958205	0.287296	-0.267591	0.73478	0.263094	0.0876848	0.202445
38.2998	0.267754	0.28406	-0.0813082	0.299707	-0.260504	0.747927	0.270516	0.08017	0.220039
38.3999	0.256139	0.293876	-0.0671966	0.31278	-0.252605	0.758238	0.276877	0.0709746	0.237476
38.5	0.243741	0.305193	-0.0538187	0.3262	-0.244158	0.765725	0.282048	0.0603499	0.25441
38.6001	0.230742	0.317695	-0.0414904	0.339634	-0.235387	0.770466	0.285925	0.0485498	0.270493
38.7002	0.217355	0.330999	-0.030451	0.352652	-0.226497	0.772602	0.28842	0.0359319	0.285408
38.7998	0.203748	0.344708	-0.0209227	0.364813	-0.217637	0.772347	0.289509	0.0229386	0.298884
38.8999	0.190061	0.358407	-0.0130544	0.375721	-0.208875	0.769926	0.289202	0.00995277	0.31073
39	0.176413	0.371705	-0.00691134	0.384958	-0.200233	0.765604	0.287535	-0.00255466	0.320758
39.1001	0.162917	0.384237	-0.00248326	0.392143	-0.191726	0.759655	0.284569	-0.0141104	0.328874
39.2002	0.149662	0.395655	0.000278171	0.396925	-0.18335	0.752344	0.280379	-0.0242547	0.335011
39.2998	0.136701	0.405673	0.00148841	0.399015	-0.175048	0.743843	0.275069	-0.0324983	0.339218
39.3999	0.123993	0.414062	0.00132924	0.398161	-0.166717	0.734354	0.268768	-0.0383927	0.341592
39.5	0.111515	0.420664	2.73566e-05	0.394243	-0.158214	0.724003	0.261599	-0.0414855	0.3423
39.6001	0.0992365	0.425381	-0.00217116	0.387228	-0.149429	0.712895	0.253667	-0.0414511	0.341524
39.7002	0.0871124	0.428169	-0.00501443	0.377148	-0.140292	0.70102	0.245101	-0.0380295	0.33949
39.7998	0.0750771	0.429043	-0.00823211	0.36414	-0.130697	0.688364	0.236009	-0.03104	0.336493
39.8999	0.0630407	0.428092	-0.0115661	0.348398	-0.120524	0.674839	0.226443	-0.0203769	0.332798
40	0.0509253	0.425466	-0.0147439	0.330215	-0.10972	0.660342	0.216442	-0.006015	0.328672
40.1001	0.03864	0.421341	-0.0175512	0.30998	-0.0982665	0.644749	0.206022	0.0119407	0.324423
40.2002	0.0260811	0.415932	-0.019814	0.288111	-0.0861687	0.627938	0.195193	0.0332334	0.320252
40.2998	0.0131292	0.409475	-0.0214299	0.265064	-0.0734195	0.60982	0.183938	0.0575334	0.316401
40.3999	-0.00034523	0.402175	-0.0223246	0.241312	-0.0600618	0.590285	0.172238	0.0843506	0.313002
40.5	-0.0144148	0.394285	-0.0224162	0.217289	-0.0461849	0.569268	0.160062	0.113194	0.31016
40.6001	-0.0291109	0.386057	-0.0216329	0.193428	-0.0319013	0.54669	0.147392	0.143413	0.307975
40.7002	-0.0444698	0.377732	-0.01996	0.170109	-0.0173434	0.52252	0.134215	0.174367	0.306447
40.7998	-0.0605469	0.369499	-0.0173911	0.147648	-0.00269214	0.496819	0.120559	0.205386	0.305554
40.8999	-0.077363	0.361524	-0.0139715	0.126297	0.0118442	0.469645	0.106471	0.235719	0.305214
41	-0.0948744	0.353932	-0.00974916	0.106216	0.0260731	0.441113	0.0920047	0.264699	0.305363
41.1001	-0.11304	0.34682	-0.00479961	0.0874977	0.0397735	0.411299	0.0772762	0.291661	0.305877
41.2002	-0.131783	0.340245	0.000810892	0.0701694	0.0527044	0.380343	0.0624505	0.316031	0.306583
41.2998	-0.151012	0.334229	0.00696723	0.0541477	0.064642	0.348359	0.0477125	0.337309	0.307343
41.3999	-0.170555	0.328724	0.0135445	0.0393047	0.0753623	0.315464	0.0332629	0.355076	0.307968
41.5	-0.19016	0.323689	0.0204225	0.0254612	0.0846496	0.281794	0.0193386	0.369087	0.308328
41.6001	-0.209538	0.319047	0.027475	0.0124359	0.0923415	0.247475	0.00616092	0.379172	0.308298
41.7002	-0.228418	0.314694	0.0345564	1.71661e-05	0.0982967	0.212618	-0.00606054	0.385319	0.307767
41.7998	-0.246551	0.310502	0.0415189	-0.0119896	0.102388	0.177319	-0.0171219	0.387668	0.306628
41.8999	-0.263683	0.306313	0.0482199	-0.0237598	0.104555	0.141646	-0.0268498	0.386389	0.304776
42	-0.27957	0.301956	0.0545352	-0.0354347	0.10479	0.105679	-0.0351169	0.381831	0.302154
42.1001	-0.293986	0.297247	0.0603381	-0.0470886	0.103123	0.0695042	-0.0418252	0.374353	0.298676
42.2002	-0.306749	0.292044	0.0655181	-0.0587616	0.0996509	0.0332169	-0.046936	0.364389	0.294307
42.2998	-0.317712	0.286193	0.0699721	-0.0704556	0.094483	-0.0030571	-0.0504661	0.352438	0.289019
42.3999	-0.326764	0.279534	0.0736111	-0.0821438	0.0877486	-0.0391403	-0.052487	0.339027	0.282803
42.5	-0.333907	0.271917	0.0763635	-0.0937614	0.0796281	-0.0748783	-0.053137	0.324701	0.275645
42.6001	-0.339208	0.263238	0.0782054	-0.105227	0.0703545	-0.110056	-0.0525887	0.309935	0.267549
42.7002	-0.342754	0.253441	0.0791361	-0.116446	0.0601736	-0.144415	-0.0510161	0.295156	0.258509
42.7998	-0.344679	0.242479	0.0791493	-0.12735	0.0493461	-0.177683	-0.0486272	0.280783	0.248512
42.8999	-0.345146	0.23031	0.078233	-0.137905	0.0381018	-0.209547	-0.0456503	0.267108	0.23757
43	-0.344345	0.216955	0.0764245	-0.148054	0.0266686	-0.239761	-0.0422793	0.254444	0.225706
43.1001	-0.342492	0.202481	0.073759	-0.157812	0.0152727	-0.268001	-0.0387073	0.242978	0.212973
43.2002	-0.339776	0.186995	0.0702499	-0.167236	0.00415286	-0.293996	-0.0351061	0.232868	0.199417
43.2998	-0.336372	0.170623	0.0659746	-0.176432	-0.00649158	-0.317443	-0.0316001	0.22418	0.185079
43.3999	-0.332447	0.153506	0.0609736	-0.185572	-0.0165033	-0.338094	-0.0282698	0.216905	0.170074
43.5	-0.328137	0.135824	0.0553415	-0.194847	-0.0257658	-0.355793	-0.0251515	0.210984	0.154514
43.6001	-0.323537	0.117809	0.0491694	-0.204464	-0.0341806	-0.370409	-0.0222193	0.206255	0.138475
43.7002	-0.318706	0.0996673	0.0425214	-0.214607	-0.0416574	-0.381916	-0.0194055	0.202576	0.122093
43.7998	-0.313651	0.081594	0.0354318	-0.225449	-0.04815	-0.390302	-0.0166168	0.199815	0.10545
43.8999	-0.308344	0.0637831	0.0279633	-0.237101	-0.0536079	-0.39561	-0.0137207	0.197713	0.0886958
44	-0.302764	0.0463955	0.0201953	-0.249624	-0.0580167	-0.397977	-0.0105588	0.196051	0.0719316
44.1001	-0.296884	0.0296183	0.0122016	-0.263014	-0.0614127	-0.397571	-0.00696562	0.194591	0.055301
44.2002	-0.290653	0.0135982	0.00403276	-0.277166	-0.0638541	-0.394624	-0.00278301	0.193119	0.0389013
44.2998	-0.284037	-0.00159113	-0.0043135	-0.291912	-0.0653934	-0.389385	0.00215224	0.191496	0.0228188
44.3999	-0.276984	-0.0159201	-0.0128514	-0.306953	-0.0660752	-0.382145	0.00799811	0.189519	0.00716305
44.5	-0.26952	-0.0293929	-0.0215951	-0.321903	-0.0659651	-0.373203	0.0148633	0.187096	-0.0080471
44.6001	-0.261702	-0.0420484	-0.0305815	-0.336306	-0.0651487	-0.362878	0.0228142	0.184134	-0.022768
44.7002	-0.253598	-0.0539399	-0.0398584	-0.349672	-0.0637216	-0.35149	0.0318936	0.180594	-0.0369413
44.7998	-0.245304	-0.0651525	-0.0494728	-0.361515	-0.0617775	-0.339315	0.0421065	0.176561	-0.0505373
44.8999	-0.236989	-0.0757688	-0.0594645	-0.371309	-0.0594262	-0.326635	0.053391	0.172094	-0.0635018
45	-0.228847	-0.0859009	-0.0698515	-0.378565	-0.0567531	-0.313694	0.0656431	0.167438	-0.0757749
45.1001	-0.2211	-0.0956381	-0.0806969	-0.382877	-0.0538124	-0.300666	0.0787138	0.162826	-0.0872722
45.2002	-0.213985	-0.105068	-0.0920266	-0.383963	-0.050671	-0.287723	0.09241	0.158509	-0.0979142
45.2998	-0.207763	-0.114258	-0.103866	-0.381674	-0.047387	-0.274904	0.106523	0.154856	-0.107582
45.3999	-0.202638	-0.123231	-0.116185	-0.375977	-0.043991	-0.262218	0.120834	0.152197	-0.116162
45.5	-0.198842	-0.131996	-0.128912	-0.366989	-0.040544	-0.249647	0.135124	0.1509	-0.123502
45.6001	-0.196584	-0.14052	-0.141925	-0.354975	-0.0370874	-0.237081	0.149182	0.151213	-0.129395
45.7002	-0.196015	-0.148696	-0.155073	-0.340376	-0.0336126	-0.224384	0.162809	0.153411	-0.13366
45.7998	-0.197243	-0.156399	-0.168199	-0.323727	-0.0300807	-0.211309	0.175832	0.157739	-0.136093
45.8999	-0.200303	-0.163471	-0.181143	-0.305679	-0.0264959	-0.19761	0.188089	0.164317	-0.136513
46	-0.205173	-0.169752	-0.193735	-0.286957	-0.0228542	-0.183015	0.199435	0.173295	-0.134768
46.1001	-0.21174	-0.175083	-0.205757	-0.268356	-0.0191445	-0.167284	0.209745	0.184666	-0.130682
46.2002	-0.219851	-0.179274	-0.217027	-0.250671	-0.0153684	-0.150165	0.218899	0.198342	-0.124154
46.2998	-0.22928	-0.18217	-0.227387	-0.234667	-0.0115394	-0.13141	0.2268	0.214163	-0.1151
46.3999	-0.239743	-0.183686	-0.236717	-0.221041	-0.00766412	-0.110839	0.233391	0.231831	-0.103533
46.5	-0.250853	-0.183793	-0.244925	-0.210384	-0.0038232	-0.0883842	0.238643	0.25102	-0.0894864
46.6001	-0.262225	-0.182462	-0.251936	-0.203163	-9.48103e-05	-0.0640217	0.242536	0.271344	-0.0730429
46.7002	-0.273458	-0.179723	-0.257753	-0.199703	0.00343378	-0.0378738	0.245056	0.292381	-0.0543511
46.7998	-0.284128	-0.175697	-0.262416	-0.200146	0.00663861	-0.010141	0.246154	0.313724	-0.0336607
46.8999	-0.293827	-0.170542	-0.265983	-0.204472	0.009348	0.0188602	0.245783	0.334933	-0.011277
47	-0.302207	-0.164473	-0.268559	-0.212511	0.0113436	0.0487026	0.243898	0.355614	0.0124614
47.1001	-0.308984	-0.157773	-0.270266	-0.223944	0.0124389	0.0789131	0.240479	0.375316	0.0371234
47.2002	-0.313951	-0.150753	-0.27121	-0.23831	0.0124532	0.108958	0.235495	0.393688	0.0622663
47.2998	-0.316983	-0.143714	-0.27151	-0.255054	0.0111667	0.138241	0.228918	0.410448	0.087364
47.3999	-0.318022	-0.136934	-0.27126	-0.273499	0.0083824	0.166144	0.220768	0.425341	0.111906
47.5	-0.317143	-0.130672	-0.270564	-0.292973	0.0039049	0.192011	0.211124	0.438207	0.135375
47.6001	-0.314552	-0.125147	-0.269504	-0.312763	-0.00241462	0.215275	0.200093	0.448961	0.157256
47.7002	-0.310518	-0.120524	-0.268101	-0.332165	-0.0106634	0.235419	0.187779	0.457511	0.177078
47.7998	-0.305375	-0.116902	-0.266324	-0.350513	-0.0209088	0.251984	0.174349	0.463888	0.194352
47.8999	-0.299495	-0.11431	-0.264117	-0.367201	-0.0331658	0.264639	0.160055	0.468102	0.208692
48	-0.293262	-0.112676	-0.261424	-0.381721	-0.0473465	0.273163	0.145199	0.470253	0.219729
48.1001	-0.287076	-0.111842	-0.258128	-0.393669	-0.0632891	0.277447	0.130105	0.470406	0.227175
48.2002	-0.281301	-0.111591	-0.254096	-0.402746	-0.0807461	0.277518	0.115114	0.468655	0.230896
48.2998	-0.276286	-0.111651	-0.249178	-0.408735	-0.0994138	0.273482	0.100599	0.465152	0.230795
48.3999	-0.272326	-0.111751	-0.243244	-0.411495	-0.118929	0.265566	0.0869202	0.460047	0.2269
48.5	-0.269608	-0.111613	-0.23618	-0.411022	-0.138886	0.254143	0.0744324	0.45349	0.219336
48.6001	-0.268203	-0.111002	-0.227911	-0.407413	-0.158816	0.239666	0.0634872	0.44566	0.208328
48.7002	-0.268088	-0.109687	-0.218426	-0.400818	-0.178211	0.222668	0.0544179	0.43663	0.194188
48.7998	-0.269142	-0.107469	-0.207766	-0.391472	-0.196557	0.203713	0.047475	0.426621	0.177296
48.8999	-0.271181	-0.104226	-0.196002	-0.379656	-0.213376	0.183377	0.0428443	0.415761	0.1581
49	-0.273963	-0.0999449	-0.183256	-0.365685	-0.228246	0.162339	0.0406808	0.404254	0.137087
49.1001	-0.277172	-0.0947142	-0.16974	-0.349918	-0.240739	0.141196	0.0410493	0.392287	0.114761
49.2002	-0.280457	-0.0886958	-0.155762	-0.332726	-0.250501	0.12057	0.0439224	0.380061	0.0916746
49.2998	-0.283472	-0.0821671	-0.141626	-0.31447	-0.257254	0.100989	0.049213	0.367894	0.0683017
49.3999	-0.285945	-0.0754438	-0.127691	-0.295477	-0.260762	0.082972	0.0567852	0.355992	0.0451486
49.5	-0.287665	-0.0688941	-0.114337	-0.276062	-0.260887	0.0669159	0.0664207	0.344631	0.0226126
49.6001	-0.288438	-0.0629205	-0.101932	-0.256575	-0.257632	0.0531429	0.0778213	0.334047	0.00105047
49.7002	-0.288114	-0.0579502	-0.0908449	-0.237318	-0.251088	0.0418571	0.0906686	0.32444	-0.0192802
49.7998	-0.286629	-0.0543665	-0.0814047	-0.218588	-0.241401	0.0331787	0.104618	0.316058	-0.0381372
49.8999	-0.283989	-0.0524973	-0.0739066	-0.200647	-0.228763	0.0270847	0.119357	0.309057	-0.0554082
50	-0.280263	-0.0526253	-0.0686068	-0.18372	-0.213451	0.0234684	0.13457	0.303624	-0.0710092
50.1001	-0.275579	-0.0549382	-0.0656778	-0.167919	-0.19583	0.0220703	0.149954	0.299825	-0.0849571
50.2002	-0.270098	-0.0595618	-0.0652232	-0.153364	-0.176327	0.0225586	0.165288	0.297686	-0.0973399
50.2998	-0.263978	-0.0665076	-0.0673006	-0.140089	-0.155407	0.024464	0.180393	0.297202	-0.108287
50.3999	-0.257425	-0.0756677	-0.0718852	-0.12808	-0.133533	0.0273136	0.195167	0.298245	-0.117967
50.5	-0.250649	-0.0868421	-0.0788677	-0.117258	-0.111172	0.0305904	0.209554	0.300653	-0.126567
50.6001	-0.243791	-0.0997999	-0.0880892	-0.107445	-0.0888023	0.0337109	0.22354	0.304152	-0.134259
50.7002	-0.236997	-0.114239	-0.0993109	-0.0984364	-0.0668801	0.0361179	0.237202	0.308473	-0.141232
50.7998	-0.230373	-0.129773	-0.112223	-0.0899582	-0.0458221	0.0372528	0.250699	0.313327	-0.1476
50.8999	-0.224009	-0.145996	-0.126491	-0.0817356	-0.0259966	0.0366672	0.26422	0.31836	-0.153492
51	-0.217925	-0.162473	-0.141771	-0.0734177	-0.00771991	0.0339436	0.277935	0.323236	-0.158978
51.1001	-0.212105	-0.178811	-0.157678	-0.0646477	0.00875052	0.0288071	0.292044	0.327576	-0.164121
51.2002	-0.206542	-0.194634	-0.173825	-0.0550327	0.0231768	0.0210079	0.306753	0.330977	-0.168913
51.2998	-0.201201	-0.209574	-0.1898	-0.0442333	0.0354286	0.010405	0.322215	0.333173	-0.173269
51.3999	-0.196025	-0.223277	-0.20519	-0.0319595	0.0454574	-0.00296174	0.338515	0.333868	-0.177076
51.5	-0.19095	-0.235453	-0.219629	-0.0180035	0.0532952	-0.0189529	0.35567	0.332858	-0.180194
51.6001	-0.185925	-0.245857	-0.232785	-0.00217819	0.059034	-0.0373398	0.373604	0.329972	-0.182431
51.7002	-0.180867	-0.254288	-0.244379	0.0156002	0.0628587	-0.0577885	0.392192	0.325115	-0.183613
51.7998	-0.175723	-0.260573	-0.254148	0.0353107	0.065002	-0.0798946	0.411282	0.318234	-0.183535
51.8999	-0.170444	-0.264601	-0.261903	0.0568409	0.0657178	-0.103159	0.430638	0.309329	-0.182031
52	-0.165002	-0.26627	-0.267493	0.0799789	0.0653029	-0.127098	0.449918	0.298485	-0.178953
52.1001	-0.159361	-0.265521	-0.270843	0.104416	0.0640651	-0.151106	0.46874	0.285825	-0.174161
52.2002	-0.153488	-0.262327	-0.271962	0.129793	0.0623155	-0.174602	0.486706	0.271489	-0.16758
52.2998	-0.147341	-0.256666	-0.270907	0.155666	0.0603453	-0.196994	0.50342	0.255718	-0.159173
52.3999	-0.140903	-0.248528	-0.267829	0.181576	0.0584164	-0.217767	0.518518	0.238749	-0.148963
52.5	-0.134173	-0.237941	-0.262899	0.207018	0.0567442	-0.23644	0.531661	0.220844	-0.137009
52.6001	-0.127135	-0.224972	-0.256366	0.231497	0.0554896	-0.252609	0.542532	0.202289	-0.123495
52.7002	-0.119767	-0.209736	-0.248496	0.254597	0.0547782	-0.265956	0.550875	0.18333	-0.108657
52.7998	-0.112093	-0.192351	-0.239535	0.275928	0.0546928	-0.276277	0.55652	0.164296	-0.0927474
52.8999	-0.104122	-0.173002	-0.229772	0.295151	0.055265	-0.283455	0.559376	0.145449	-0.0760641
53	-0.0958614	-0.15188	-0.219457	0.311987	0.0564438	-0.287462	0.559416	0.127045	-0.0589635
53.1001	-0.0873232	-0.129224	-0.208831	0.326242	0.0581199	-0.288391	0.556695	0.109338	-0.0418153
53.2002	-0.0785503	-0.105296	-0.198101	0.337784	0.0601631	-0.286459	0.55132	0.0925588	-0.0249734
53.2998	-0.0695591	-0.0803668	-0.187443	0.346556	0.0624362	-0.28195	0.543445	0.0769526	-0.00880837
53.3999	-0.0603914	-0.0547559	-0.176989	0.352528	0.0647775	-0.275228	0.533241	0.0626988	0.00637484
53.5	-0.0511074	-0.0287924	-0.166828	0.355728	0.0670248	-0.266723	0.520926	0.0500651	0.0202835
53.6001	-0.0417633	-0.00284975	-0.15704	0.356215	0.0690022	-0.256902	0.506766	0.0392807	0.0326433
53.7002	-0.0324306	0.022718	-0.147651	0.354063	0.0705348	-0.246261	0.491033	0.030449	0.0432734
53.7998	-0.0231705	0.0475763	-0.138653	0.349379	0.071456	-0.235281	0.474003	0.0237756	0.0520194
53.8999	-0.0140467	0.0714258	-0.130031	0.342234	0.0716678	-0.224437	0.455953	0.0193705	0.0587704
54	-0.00511646	0.0940181	-0.121719	0.332747	0.0710779	-0.214128	0.437159	0.0173402	0.063493
54.1001	0.00360298	0.11513	-0.113689	0.321012	0.0696078	-0.204736	0.417884	0.0177744	0.0661619
54.2002	0.0120764	0.13462	-0.105927	0.307169	0.0672141	-0.196581	0.398368	0.0206852	0.0668468
54.2998	0.0202618	0.152381	-0.098444	0.291367	0.0638271	-0.189903	0.378855	0.0261412	0.0656128
54.3999	0.0281267	0.168402	-0.09123	0.273764	0.0594054	-0.18482	0.359625	0.0341121	0.0625963
54.5	0.0356274	0.182708	-0.0843257	0.254593	0.0539475	-0.181394	0.340953	0.044587	0.0579133
54.6001	0.0427694	0.195381	-0.0777731	0.234087	0.0474444	-0.179588	0.323109	0.0574101	0.0517342
54.7002	0.0495462	0.206554	-0.0716026	0.212521	0.0398842	-0.179323	0.306386	0.0723992	0.0442114
54.7998	0.0559721	0.216384	-0.0658794	0.190256	0.0312515	-0.180484	0.291068	0.0894104	0.0355268
54.8999	0.0620689	0.225051	-0.0606629	0.167639	0.0215641	-0.182874	0.27741	0.108205	0.0258362
55	0.0679035	0.232744	-0.056037	0.145075	0.0108529	-0.186262	0.26564	0.128568	0.0153308
55.1001	0.0735073	0.239665	-0.0520472	0.123007	-0.000871578	-0.190446	0.255961	0.150251	0.00422955
55.2002	0.0789185	0.246004	-0.0487331	0.101847	-0.0135998	-0.195194	0.248555	0.172988	-0.00728798
55.2998	0.0841665	0.25189	-0.0460823	0.0820179	-0.0272397	-0.200275	0.243513	0.196522	-0.0189896
55.3999	0.0892658	0.257418	-0.0440703	0.0638332	-0.0416922	-0.205488	0.240841	0.220508	-0.0306568
55.5	0.0942297	0.262638	-0.0426937	0.0475826	-0.0568079	-0.210638	0.240483	0.244673	-0.0420151
55.6001	0.0990839	0.267586	-0.0419096	0.0334854	-0.0724081	-0.215646	0.242283	0.268717	-0.0527937
55.7002	0.103842	0.272251	-0.0416917	0.0217152	-0.0882715	-0.220438	0.246013	0.292447	-0.0627427
55.7998	0.108491	0.276586	-0.0420037	0.0123367	-0.104138	-0.224996	0.251361	0.315625	-0.0715289
55.8999	0.113014	0.280486	-0.0427663	0.00528336	-0.119699	-0.229326	0.257907	0.338019	-0.0788796
56	0.117371	0.28381	-0.0439079	0.000452042	-0.134617	-0.233476	0.265196	0.359419	-0.0845132
56.1001	0.121518	0.286413	-0.0453392	-0.00233841	-0.14855	-0.237545	0.272755	0.379622	-0.0881546
56.2002	0.125382	0.288158	-0.0469835	-0.00332642	-0.16119	-0.241659	0.280097	0.398435	-0.0895963
56.2998	0.128912	0.288929	-0.0487633	-0.00279617	-0.172199	-0.245935	0.286721	0.415677	-0.0886469
56.3999	0.132032	0.288648	-0.0506074	-0.00103951	-0.18122	-0.25049	0.29217	0.431112	-0.0852151
56.5	0.134672	0.287222	-0.0524493	0.00169563	-0.187956	-0.255407	0.296044	0.444562	-0.0792127
56.6001	0.136756	0.284621	-0.054219	0.00517464	-0.192164	-0.260769	0.298004	0.455819	-0.0707088
56.7002	0.138223	0.280848	-0.0558358	0.0091877	-0.193692	-0.266605	0.297851	0.464707	-0.0597947
56.7998	0.139022	0.275921	-0.0572204	0.0135956	-0.192431	-0.27292	0.295493	0.471055	-0.0466914
56.8999	0.139096	0.269923	-0.0583128	0.0182858	-0.188317	-0.279676	0.290931	0.474712	-0.031698
57	0.138449	0.262973	-0.0590678	0.0232029	-0.181362	-0.286827	0.28431	0.475592	-0.0151713
57.1001	0.137028	0.255223	-0.0594374	0.0283661	-0.171672	-0.294313	0.275887	0.473601	0.00248218
57.2002	0.13486	0.246844	-0.0593482	0.0338192	-0.159427	-0.302019	0.265997	0.468659	0.0208101
57.2998	0.131998	0.23804	-0.0587718	0.0396137	-0.144869	-0.309841	0.255033	0.460818	0.0393488
57.3999	0.128538	0.228992	-0.0577182	0.0458431	-0.128266	-0.317665	0.243449	0.450178	0.0576179
57.5	0.124573	0.219907	-0.0561958	0.0526009	-0.109889	-0.325397	0.231751	0.436951	0.075202
57.6001	0.120146	0.210994	-0.0542569	0.0599899	-0.0900344	-0.333006	0.220489	0.421385	0.0916941
57.7002	0.115304	0.202477	-0.0519584	0.0681019	-0.0690583	-0.340461	0.21016	0.403797	0.10679
57.7998	0.110085	0.194515	-0.0493875	0.0769463	-0.0473317	-0.347818	0.201205	0.384615	0.120208
57.8999	0.10454	0.187222	-0.0466549	0.0865269	-0.0252651	-0.35518	0.19393	0.364195	0.131818
58	0.0987005	0.18072	-0.0439037	0.0967941	-0.00323049	-0.362711	0.188595	0.342957	0.141559
58.1001	0.0925465	0.175097	-0.0412487	0.10763	0.0183955	-0.370559	0.185387	0.321323	0.149502
58.2002	0.0860138	0.170392	-0.0388233	0.118912	0.0392404	-0.378887	0.184379	0.299687	0.1558
58.2998	0.0790091	0.166605	-0.0367375	0.130451	0.0589224	-0.387926	0.185542	0.278416	0.160673
58.3999	0.0714521	0.163702	-0.0350682	0.142054	0.0770613	-0.397842	0.188744	0.257755	0.164443
58.5	0.0632286	0.161611	-0.033902	0.153458	0.0933057	-0.408809	0.193777	0.237994	0.167426
58.6001	0.0542059	0.160246	-0.0332874	0.164442	0.107326	-0.420906	0.200352	0.219233	0.169998
58.7002	0.044239	0.159479	-0.0331994	0.174728	0.118801	-0.434152	0.208095	0.201502	0.172588
58.7998	0.0332098	0.159165	-0.0336043	0.184103	0.127455	-0.448452	0.216606	0.184766	0.175519
58.8999	0.0210247	0.159151	-0.0344495	0.192326	0.133087	-0.463613	0.225471	0.168872	0.179134
59	0.00763607	0.15928	-0.0356317	0.199186	0.135572	-0.479322	0.234271	0.153676	0.183704
59.1001	-0.0069418	0.159404	-0.0370154	0.204477	0.134848	-0.495151	0.242588	0.138986	0.189456
59.2002	-0.0226316	0.15939	-0.0384574	0.208035	0.130962	-0.510585	0.250046	0.124596	0.196519
59.2998	-0.039319	0.159098	-0.0398045	0.209738	0.124017	-0.525001	0.256326	0.110304	0.204898
59.3999	-0.0568237	0.158382	-0.0409078	0.209509	0.114209	-0.537719	0.261176	0.0959613	0.214532
59.5	-0.0749063	0.157134	-0.0416513	0.207256	0.101867	-0.548015	0.26441	0.081485	0.225279
59.6001	-0.0933075	0.155299	-0.0419468	0.202873	0.0873905	-0.555135	0.265888	0.0668486	0.236925
59.7002	-0.111744	0.152862	-0.0416999	0.196352	0.0712205	-0.558351	0.265527	0.0520843	0.24919
59.7998	-0.129897	0.149809	-0.040827	0.187653	0.0538894	-0.557006	0.263324	0.0373677	0.261732
59.8999	-0.147476	0.146171	-0.0393286	0.176817	0.0359479	-0.550552	0.25934	0.0229192	0.274214
60	-0.16422	0.141977	-0.0372734	0.163868	0.0179196	-0.538555	0.253695	0.00908542	0.286216
60.1001	-0.179908	0.137282	-0.0347515	0.148857	0.000365338	-0.520765	0.246517	-0.00381272	0.297335
60.2002	-0.194376	0.132204	-0.0318845	0.13184	-0.0162038	-0.497068	0.237972	-0.0153454	0.307195
60.2998	-0.207565	0.126846	-0.0287911	0.112888	-0.0313434	-0.467577	0.228259	-0.0250965	0.315435
60.3999	-0.219454	0.121274	-0.0256129	0.0920773	-0.0447292	-0.43251	0.217561	-0.0326508	0.321775
60.5	-0.230103	0.115593	-0.0225553	0.0695381	-0.056127	-0.392286	0.206084	-0.0375933	0.325986
60.6001	-0.239676	0.10997	-0.0197697	0.045393	-0.0653648	-0.347482	0.194024	-0.0395943	0.327913
60.7002	-0.248393	0.104565	-0.017417	0.0197849	-0.0723819	-0.298776	0.18152	-0.038366	0.327444
60.7998	-0.256474	0.0994909	-0.0156257	-0.00711441	-0.0772242	-0.24699	0.168705	-0.0337018	0.324571
60.8999	-0.264178	0.0949017	-0.0145404	-0.0351105	-0.0800437	-0.193018	0.155716	-0.0254988	0.31931
61	-0.271821	0.0909409	-0.0142545	-0.0639343	-0.081067	-0.137796	0.142653	-0.0137065	0.311823
61.1001	-0.279707	0.0877278	-0.0148322	-0.0933266	-0.0805663	-0.0822216	0.129582	0.00157061	0.302306
61.2002	-0.288059	0.0853806	-0.0162992	-0.123018	-0.0788387	-0.0271736	0.11654	0.0201678	0.291009
61.2998	-0.29709	0.0839947	-0.018647	-0.152729	-0.0762166	0.0265144	0.103521	0.0417927	0.278242
61.3999	-0.306932	0.0836675	-0.0218103	-0.182158	-0.0730781	0.0781273	0.0905668	0.0661187	0.264306
61.5	-0.317634	0.0844913	-0.0256876	-0.210991	-0.0697874	0.126995	0.0776763	0.0926877	0.24956
61.6001	-0.329175	0.0865415	-0.0301778	-0.238922	-0.0666498	0.172638	0.0648053	0.120978	0.234346
61.7002	-0.341472	0.0898267	-0.0351565	-0.265652	-0.063918	0.214659	0.0519461	0.150447	0.219005
61.7998	-0.354345	0.0943288	-0.0404553	-0.290901	-0.061829	0.252852	0.0391325	0.180521	0.20384
61.8999	-0.367579	0.100032	-0.045902	-0.314415	-0.0605611	0.287098	0.0264077	0.210537	0.189117
62	-0.380868	0.106847	-0.0513245	-0.335987	-0.0601896	0.317414	0.0138099	0.239929	0.175107
62.1001	-0.393883	0.114651	-0.0564974	-0.355427	-0.0607561	0.343924	0.00138993	0.268067	0.162001
62.2002	-0.406268	0.123276	-0.0611527	-0.372593	-0.0622586	0.366816	-0.0107838	0.294404	0.149943
62.2998	-0.417684	0.132512	-0.0650696	-0.387402	-0.0646376	0.386387	-0.0226118	0.318476	0.139024
62.3999	-0.427811	0.142152	-0.0680559	-0.399815	-0.0677723	0.402932	-0.0340003	0.339827	0.129284
62.5	-0.43636	0.151935	-0.0699621	-0.409842	-0.0715012	0.416846	-0.0448366	0.358164	0.120738
62.6001	-0.443071	0.161612	-0.0706632	-0.417536	-0.0756106	0.42854	-0.0549843	0.373282	0.113344
62.7002	-0.447728	0.170913	-0.0700472	-0.423025	-0.0798883	0.438446	-0.064316	0.385083	0.106981
62.7998	-0.450173	0.179587	-0.0680318	-0.426487	-0.0841183	0.447026	-0.0727181	0.393624	0.101586
62.8999	-0.450326	0.187389	-0.0645695	-0.428122	-0.088077	0.454676	-0.0800713	0.398982	0.0970082
63	-0.44817	0.194054	-0.0596677	-0.428143	-0.0915498	0.461781	-0.0862615	0.401424	0.093147
63.1001	-0.443717	0.19937	-0.0533773	-0.426861	-0.0943374	0.468682	-0.0912164	0.401214	0.0898829
63.2002	-0.437057	0.203188	-0.0458004	-0.424582	-0.0963201	0.475686	-0.0949299	0.398652	0.0871105
63.2998	-0.428335	0.205414	-0.0370723	-0.421631	-0.0974325	0.483027	-0.0974013	0.394149	0.0847416
63.3999	-0.417719	0.205973	-0.0273901	-0.418303	-0.0976299	0.490929	-0.0986546	0.388125	0.0826814
63.5	-0.405421	0.204857	-0.0169398	-0.414877	-0.0969152	0.49956	-0.0987544	0.381045	0.0808551
63.6001	-0.391721	0.202073	-0.00591244	-0.411673	-0.0953855	0.509014	-0.0977777	0.37328	0.0792205
63.7002	-0.376942	0.19767	0.00550635	-0.408974	-0.0932058	0.519335	-0.0958151	0.365126	0.0777078
63.7998	-0.361445	0.191744	0.0171443	-0.407009	-0.0905952	0.530503	-0.0929819	0.356916	0.0762799
63.8999	-0.345616	0.184451	0.0288131	-0.40591	-0.0878209	0.542397	-0.0893922	0.348847	0.0748997
64	-0.329863	0.175929	0.0403395	-0.405807	-0.0852045	0.554871	-0.0851729	0.341145	0.0735347
64.1001	-0.314645	0.166327	0.0516098	-0.406775	-0.0830731	0.567717	-0.0804658	0.333916	0.07214
64.2002	-0.30043	0.155758	0.0624832	-0.408831	-0.0817603	0.580668	-0.0753916	0.327196	0.0706692
64.2998	-0.2877	0.144341	0.0728303	-0.411926	-0.0816158	0.593451	-0.0700119	0.32102	0.0690372
64.3999	-0.276952	0.132182	0.0825502	-0.415962	-0.0829705	0.605727	-0.0644071	0.315359	0.067205
64.5	-0.26866	0.119408	0.0915771	-0.420839	-0.0860824	0.61715	-0.0586768	0.310194	0.0650682
64.6001	-0.263291	0.10609	0.0998418	-0.426414	-0.0911802	0.627373	-0.0529172	0.305447	0.0626397
64.7002	-0.261238	0.0922791	0.107241	-0.432556	-0.0984115	0.636071	-0.0472272	0.301092	0.0598764
64.7998	-0.262842	0.0780339	0.113634	-0.439077	-0.107828	0.642952	-0.0416736	0.297086	0.0568051
64.8999	-0.268381	0.063373	0.118899	-0.445808	-0.119389	0.647801	-0.0363529	0.293364	0.0534508
65	-0.278052	0.0483448	0.122842	-0.452579	-0.132966	0.650458	-0.0314227	0.289876	0.0498595
65.1001	-0.291909	0.0330343	0.125279	-0.459278	-0.148339	0.65082	-0.0270633	0.286541	0.0461538
65.2002	-0.309905	0.0175407	0.126018	-0.465784	-0.165212	0.648846	-0.0234533	0.283313	0.0424645
65.2998	-0.33186	0.00194032	0.1249	-0.472027	-0.183231	0.644585	-0.0207627	0.280086	0.0389659
65.3999	-0.357481	-0.0136666	0.121758	-0.47797	-0.202007	0.638157	-0.0191617	0.276714	0.0358531
65.5	-0.386325	-0.0291631	0.116411	-0.483574	-0.22111	0.629774	-0.0188463	0.273122	0.0333378
65.6001	-0.417818	-0.0443954	0.108692	-0.488834	-0.240038	0.619685	-0.0199989	0.269165	0.0316479
65.7002	-0.451297	-0.0591851	0.0985111	-0.493734	-0.258288	0.60822	-0.0227724	0.26464	0.0309947
65.7998	-0.486032	-0.0733665	0.0858933	-0.498249	-0.275391	0.595736	-0.0272608	0.25938	0.0315819
65.8999	-0.52125	-0.0867733	0.0709096	-0.502346	-0.290875	0.58259	-0.0334535	0.253207	0.0335622
66	-0.556132	-0.0992456	0.0536874	-0.506001	-0.304331	0.569142	-0.0413183	0.246006	0.0370183
66.1001	-0.589829	-0.110651	0.0343927	-0.509172	-0.315392	0.555714	-0.0507321	0.237602	0.041976
66.2002	-0.621476	-0.120864	0.013275	-0.511795	-0.323767	0.542622	-0.0614666	0.227847	0.0483849
66.2998	-0.65024	-0.129802	-0.00932598	-0.513798	-0.329243	0.530156	-0.0732158	0.21674	0.0561521
66.3999	-0.675393	-0.137431	-0.0330326	-0.515036	-0.331687	0.51853	-0.0855901	0.204256	0.0651248
66.5	-0.696307	-0.143746	-0.057416	-0.515421	-0.331066	0.507859	-0.0981425	0.190447	0.0751264
66.6001	-0.712449	-0.148804	-0.082053	-0.514809	-0.327416	0.498228	-0.110375	0.175453	0.0858827
66.7002	-0.723379	-0.152697	-0.10655	-0.513088	-0.320883	0.489636	-0.121756	0.159425	0.0971267
66.7998	-0.728803	-0.155543	-0.130516	-0.510138	-0.311658	0.482033	-0.131739	0.142665	0.108606
66.8999	-0.728579	-0.157521	-0.153595	-0.505869	-0.299983	0.475325	-0.139767	0.125463	0.120042
67	-0.722664	-0.158799	-0.175432	-0.5002	-0.286179	0.469319	-0.145351	0.108225	0.131228
67.1001	-0.711139	-0.15954	-0.195738	-0.493063	-0.270627	0.463835	-0.148112	0.0913162	0.141969
67.2002	-0.694221	-0.159924	-0.214286	-0.484415	-0.25375	0.458668	-0.147747	0.0751479	0.152115
67.2998	-0.672218	-0.160106	-0.230933	-0.474251	-0.235984	0.453593	-0.144047	0.0602002	0.161582
67.3999	-0.645548	-0.160235	-0.245595	-0.462574	-0.217759	0.44837	-0.136917	0.0468326	0.170335
67.5	-0.614703	-0.160441	-0.258213	-0.449402	-0.199522	0.442759	-0.126393	0.035507	0.178389
67.6001	-0.580211	-0.160829	-0.268759	-0.434772	-0.181705	0.436549	-0.112609	0.0265378	0.185772
67.7002	-0.542637	-0.161456	-0.277282	-0.418732	-0.164679	0.42952	-0.095813	0.02017	0.192549
67.7998	-0.502548	-0.162307	-0.283891	-0.401386	-0.148798	0.421509	-0.0763668	0.0166643	0.19874
67.8999	-0.460506	-0.163347	-0.288729	-0.382833	-0.134353	0.412331	-0.0547036	0.0161253	0.204374
68	-0.417053	-0.164537	-0.291912	-0.363174	-0.121582	0.401867	-0.0313015	0.0186044	0.209471
68.1001	-0.372691	-0.165846	-0.293607	-0.342539	-0.110678	0.389983	-0.00667971	0.0240617	0.213989
68.2002	-0.327914	-0.167197	-0.293968	-0.321077	-0.101777	0.376566	0.0185876	0.0322897	0.217842
68.2998	-0.28312	-0.168496	-0.293181	-0.299017	-0.094942	0.361552	0.0439467	0.0430889	0.22091
68.3999	-0.238628	-0.169639	-0.291432	-0.276608	-0.090198	0.344857	0.0689421	0.0560529	0.222992
68.5	-0.194731	-0.170543	-0.288903	-0.254112	-0.0875372	0.32647	0.0931691	0.0708177	0.223829
68.6001	-0.151652	-0.171184	-0.285786	-0.231878	-0.0869364	0.30637	0.116285	0.0868539	0.223161
68.7002	-0.109591	-0.171505	-0.282231	-0.210323	-0.0883321	0.28455	0.138033	0.103579	0.220725
68.7998	-0.068737	-0.171454	-0.278365	-0.189873	-0.0916409	0.261073	0.158227	0.120381	0.216189
68.8999	-0.0292349	-0.171009	-0.274289	-0.171001	-0.0967449	0.236039	0.17678	0.136599	0.209349
69	0.008811	-0.170137	-0.270057	-0.154205	-0.103492	0.209582	0.193707	0.151642	0.199986
69.1001	0.0453329	-0.168843	-0.265691	-0.139933	-0.111744	0.181876	0.2091	0.164899	0.187972
69.2002	0.0802584	-0.167119	-0.261183	-0.128649	-0.121399	0.153164	0.223164	0.175792	0.173268
69.2998	0.113525	-0.164952	-0.256496	-0.120779	-0.132331	0.123738	0.236173	0.183888	0.155942
69.3999	0.145042	-0.162318	-0.251576	-0.116728	-0.144352	0.0939335	0.248385	0.188699	0.136123
69.5	0.174733	-0.159143	-0.24632	-0.116758	-0.157284	0.0641159	0.260104	0.18999	0.114047
69.6001	0.202518	-0.155364	-0.240619	-0.121033	-0.170963	0.0346779	0.271661	0.187517	0.0900588
69.7002	0.228335	-0.150891	-0.234344	-0.129539	-0.185179	0.00601615	0.283357	0.181204	0.0645397
69.7998	0.252117	-0.145638	-0.227403	-0.142208	-0.19971	-0.0214478	0.295455	0.171119	0.0379567
69.8999	0.273834	-0.1395	-0.219672	-0.158741	-0.214339	-0.0473152	0.308224	0.157413	0.0108116
70	0.293468	-0.132337	-0.211061	-0.178677	-0.228825	-0.0712124	0.321914	0.140337	-0.0164087
70.1001	0.311082	-0.124015	-0.201519	-0.201443	-0.242905	-0.092775	0.336678	0.120253	-0.0432103
70.2002	0.326765	-0.114402	-0.191062	-0.226313	-0.256294	-0.111719	0.352616	0.0975481	-0.0691442
70.2998	0.340656	-0.103423	-0.179712	-0.252485	-0.268722	-0.127807	0.369761	0.072714	-0.0937943
70.3999	0.352917	-0.091084	-0.167514	-0.279062	-0.279931	-0.140865	0.388064	0.0462798	-0.116836
70.5	0.363767	-0.0773942	-0.15454	-0.305077	-0.289676	-0.150812	0.407429	0.0187987	-0.137972
70.6001	0.373453	-0.0624189	-0.140936	-0.329584	-0.297742	-0.157676	0.427721	-0.00921436	-0.156985
70.7002	0.382262	-0.0462667	-0.126838	-0.351648	-0.303928	-0.161569	0.448752	-0.0372978	-0.173697
70.7998	0.390481	-0.0291294	-0.112444	-0.370399	-0.308096	-0.16263	0.470309	-0.0649398	-0.188069
70.8999	0.398392	-0.0112423	-0.0979686	-0.385082	-0.310167	-0.161108	0.492141	-0.0916953	-0.200055
71	0.406279	0.00710331	-0.0835917	-0.395069	-0.310132	-0.157283	0.513967	-0.117165	-0.209705
71.1001	0.414412	0.025572	-0.0695267	-0.399887	-0.307999	-0.15146	0.53551	-0.141035	-0.217101
71.2002	0.423015	0.0437831	-0.0559607	-0.399242	-0.303809	-0.143983	0.556507	-0.163057	-0.222315
71.2998	0.432229	0.0613305	-0.0430693	-0.393036	-0.297671	-0.135225	0.576651	-0.183018	-0.225457
71.3999	0.442129	0.0778262	-0.0309623	-0.38142	-0.289787	-0.125517	0.595662	-0.200878	-0.226626
71.5	0.452703	0.0928702	-0.0197421	-0.364706	-0.280361	-0.115175	0.61331	-0.216531	-0.22592
71.6001	0.463858	0.106156	-0.00952147	-0.343365	-0.269599	-0.104423	0.62941	-0.229965	-0.223439
71.7002	0.475454	0.117416	-0.000398504	-0.318047	-0.257766	-0.0934273	0.643779	-0.241262	-0.219265
71.7998	0.487255	0.126427	0.00755665	-0.289558	-0.245132	-0.0823399	0.656265	-0.250471	-0.213537
71.8999	0.498959	0.133014	0.0142923	-0.258778	-0.23199	-0.0711914	0.666789	-0.257747	-0.206378
72	0.510218	0.137084	0.0197733	-0.226643	-0.218614	-0.0600239	0.675318	-0.2632	-0.19791
72.1001	0.520689	0.138652	0.0239665	-0.194139	-0.20527	-0.0487381	0.681877	-0.266995	-0.188296
72.2002	0.530044	0.137823	0.0268967	-0.162231	-0.192198	-0.0372139	0.686525	-0.269351	-0.177667
72.2998	0.537939	0.13474	0.0285997	-0.131823	-0.179608	-0.0253025	0.689345	-0.270448	-0.166235
72.3999	0.544062	0.12959	0.0290921	-0.103733	-0.167701	-0.0128151	0.69048	-0.270526	-0.154204
72.5	0.548196	0.122609	0.0283807	-0.0786591	-0.156655	0.000416178	0.69011	-0.269733	-0.141812
72.6001	0.550217	0.114123	0.0265236	-0.0571251	-0.146583	0.0145821	0.688451	-0.268247	-0.129316
72.7002	0.550076	0.104492	0.0235993	-0.0395088	-0.137594	0.0298447	0.685717	-0.266278	-0.116956
72.7998	0.547788	0.0940638	0.0197047	-0.0260105	-0.129762	0.046328	0.682121	-0.263906	-0.104996
72.8999	0.543441	0.0831766	0.0149444	-0.0166454	-0.123106	0.0641121	0.677887	-0.261266	-0.0936322
73	0.53719	0.0721281	0.00943704	-0.0112495	-0.117657	0.0832581	0.673238	-0.258371	-0.0830686
73.1001	0.529239	0.0612102	0.0033142	-0.00950813	-0.113429	0.103728	0.668395	-0.255238	-0.0734777
73.2002	0.519858	0.0507005	-0.00329268	-0.0109673	-0.110365	0.12547	0.66356	-0.251883	-0.0650036
73.2998	0.509312	0.0408526	-0.0102279	-0.0150566	-0.108394	0.148369	0.658879	-0.248186	-0.0577583
73.3999	0.497845	0.0318575	-0.0173176	-0.0211563	-0.107429	0.172297	0.654467	-0.24407	-0.0517719
73.5	0.485712	0.023877	-0.0243677	-0.0285606	-0.107381	0.197052	0.650421	-0.239379	-0.0470586
73.6001	0.47314	0.0170408	-0.0311754	-0.0365677	-0.108177	0.222392	0.646803	-0.233972	-0.0435431
73.7002	0.460317	0.0114464	-0.0376089	-0.0444641	-0.109756	0.248053	0.643669	-0.227655	-0.0411091
73.7998	0.447375	0.00716228	-0.0435485	-0.0515556	-0.11204	0.273716	0.641054	-0.220203	-0.039643
73.8999	0.434395	0.00423731	-0.0488396	-0.0572109	-0.114957	0.299071	0.638968	-0.211409	-0.0389705
74	0.421404	0.00266736	-0.0533302	-0.0609245	-0.11842	0.323798	0.637416	-0.201067	-0.038877
74.1001	0.408402	0.0024316	-0.0568856	-0.0622425	-0.122325	0.347504	0.636378	-0.188997	-0.0391698
74.2002	0.395339	0.00349188	-0.059417	-0.0608025	-0.126577	0.369801	0.635811	-0.175088	-0.0396314
74.2998	0.382163	0.00583008	-0.060919	-0.0563335	-0.131093	0.39032	0.635673	-0.159275	-0.0400453
74.3999	0.368787	0.00943588	-0.0613726	-0.0486794	-0.135794	0.408682	0.635921	-0.141529	-0.0402627
74.5	0.355156	0.0142775	-0.0608099	-0.0377922	-0.140573	0.424521	0.636536	-0.121845	-0.0401466
74.6001	0.341195	0.0202969	-0.0592974	-0.023695	-0.145328	0.437483	0.637455	-0.100355	-0.0395217
74.7002	0.326853	0.0274273	-0.056936	-0.00650406	-0.149932	0.447174	0.638586	-0.0772312	-0.0382984
74.7998	0.31211	0.0356067	-0.053828	0.0135956	-0.154271	0.453259	0.639827	-0.0526905	-0.0364223
74.8999	0.296993	0.0447934	-0.0501487	0.0363369	-0.158206	0.455479	0.641069	-0.027039	-0.0338857
75	0.281551	0.0549327	-0.0461554	0.0614605	-0.161549	0.453667	0.642204	-0.000665562	-0.0307357
75.1001	0.26588	0.0659675	-0.0420859	0.0885715	-0.164113	0.447682	0.643115	0.0259898	-0.0270154
75.2002	0.250089	0.0778443	-0.0381691	0.117298	-0.165743	0.437477	0.64363	0.0524842	-0.0227993
75.2998	0.234357	0.0905022	-0.0345953	0.147224	-0.166315	0.423087	0.643553	0.0783582	-0.0182402
75.3999	0.218894	0.103916	-0.0315223	0.177898	-0.165736	0.404686	0.642674	0.103137	-0.0135062
75.5	0.203934	0.118045	-0.0290964	0.208914	-0.163957	0.382483	0.640779	0.126374	-0.00876164
75.6001	0.189674	0.132827	-0.027437	0.239788	-0.160969	0.356844	0.637645	0.147683	-0.00421095
75.7002	0.176385	0.148172	-0.0266094	0.270107	-0.156836	0.328225	0.63306	0.166697	-3.40939e-05
75.7998	0.164358	0.163951	-0.0265759	0.299423	-0.151657	0.297163	0.626827	0.183135	0.00360036
75.8999	0.153918	0.180034	-0.0272339	0.327349	-0.145613	0.264233	0.618788	0.196731	0.00651073
76	0.145376	0.196339	-0.0284472	0.35354	-0.139007	0.230067	0.608824	0.207368	0.00859642
76.1001	0.139031	0.212781	-0.0300103	0.377728	-0.132189	0.195332	0.596853	0.214979	0.00972915
76.2002	0.135144	0.229223	-0.0316758	0.399628	-0.125537	0.160717	0.582828	0.219581	0.00987577
76.2998	0.133941	0.245519	-0.0331639	0.419075	-0.119451	0.126831	0.566729	0.221332	0.00899959
76.3999	0.135593	0.261517	-0.0341601	0.435904	-0.114359	0.0942997	0.548562	0.22042	0.00714612
76.5	0.140224	0.277104	-0.0343386	0.450005	-0.110666	0.0636734	0.528403	0.217057	0.00443101
76.6001	0.147887	0.292174	-0.0334296	0.46137	-0.108738	0.0354713	0.506372	0.211513	0.000962257
76.7002	0.158574	0.306619	-0.0312158	0.470015	-0.108887	0.0101398	0.48263	0.204074	-0.00304484
76.7998	0.172197	0.320326	-0.0275205	0.475965	-0.111326	-0.0119778	0.457363	0.195149	-0.00737786
76.8999	0.188599	0.333206	-0.0222488	0.479271	-0.116158	-0.0306164	0.430791	0.185045	-0.0118225
77	0.207532	0.345203	-0.0153903	0.479979	-0.123353	-0.0456253	0.403137	0.17408	-0.01616
77.1001	0.228631	0.35627	-0.00702884	0.478125	-0.132726	-0.0569397	0.374681	0.162525	-0.0201831
77.2002	0.25146	0.366375	0.00264003	0.473789	-0.143964	-0.0645805	0.345696	0.150652	-0.0236998
77.2998	0.275556	0.375491	0.0133429	0.467072	-0.156678	-0.0686279	0.316448	0.138755	-0.0265646
77.3999	0.300454	0.383572	0.0247389	0.458059	-0.170381	-0.0692154	0.287224	0.127065	-0.028636
77.5	0.325657	0.390554	0.0364373	0.446772	-0.184495	-0.0664974	0.258308	0.11578	-0.0298464
77.6001	0.350625	0.396373	0.0479762	0.433214	-0.198388	-0.0607105	0.229968	0.105103	-0.0301983
77.7002	0.374778	0.400962	0.058869	0.417431	-0.211387	-0.0520893	0.202474	0.0951435	-0.029716
77.7998	0.397558	0.40424	0.0686168	0.399439	-0.222841	-0.0408741	0.1761	0.0861014	-0.0285184
77.8999	0.418469	0.406111	0.0767506	0.379292	-0.232158	-0.0273262	0.151063	0.0780678	-0.0267382
78	0.437019	0.406478	0.082805	0.357023	-0.238851	-0.0117203	0.127572	0.071225	-0.0245621
78.1001	0.452754	0.405227	0.0863927	0.332678	-0.242535	0.00569	0.105855	0.0656916	-0.0221777
78.2002	0.465281	0.402238	0.087231	0.306398	-0.242957	0.024691	0.0861188	0.0615871	-0.0197427
78.2998	0.474269	0.397445	0.0851277	0.27829	-0.240019	0.0450825	0.0685155	0.0590496	-0.0174408
78.3999	0.479456	0.390808	0.0799788	0.248583	-0.233791	0.0666565	0.0531539	0.0581581	-0.0154142
78.5	0.480645	0.382317	0.0718063	0.217508	-0.224461	0.0892624	0.0401088	0.0590214	-0.0137832
78.6001	0.477712	0.371977	0.060758	0.185375	-0.212352	0.112746	0.0294217	0.0616512	-0.0126207
78.7002	0.470591	0.359819	0.0470954	0.152523	-0.197903	0.137007	0.0210951	0.0660625	-0.0119257
78.7998	0.459296	0.345905	0.0312202	0.11935	-0.181624	0.161925	0.0150691	0.0722087	-0.0116739
78.8999	0.443892	0.330351	0.0136103	0.0862675	-0.164115	0.187357	0.0112351	0.0799591	-0.0117974
79	0.424531	0.313288	-0.00517692	0.0537739	-0.146002	0.213181	0.00945212	0.0891689	-0.0121696
79.1001	0.40146	0.294878	-0.0245259	0.0223675	-0.127908	0.239285	0.00952112	0.0996281	-0.0126057
79.2002	0.375018	0.275321	-0.0437964	-0.00739861	-0.11042	0.265528	0.0112073	0.111067	-0.0128956
79.2998	0.345623	0.254817	-0.0622935	-0.0349979	-0.0940498	0.291842	0.0142584	0.123162	-0.0128198
79.3999	0.313745	0.233587	-0.0793677	-0.059948	-0.0792421	0.31807	0.0183461	0.135568	-0.0121942
79.5	0.279922	0.211808	-0.0944198	-0.0817776	-0.0663628	0.344098	0.0230892	0.147885	-0.0108254
79.6001	0.244732	0.189645	-0.106919	-0.100073	-0.0556525	0.369748	0.0281108	0.159687	-0.00854874
79.7002	0.20877	0.167273	-0.116425	-0.114477	-0.0472283	0.394934	0.0330723	0.170609	-0.00522447
79.7998	0.172667	0.144891	-0.122616	-0.124752	-0.0411209	0.419537	0.0376268	0.180299	-0.000732422
79.8999	0.13706	0.122689	-0.125256	-0.13072	-0.0372504	0.443507	0.0414176	0.188446	0.00497603
80	0.102589	0.100859	-0.124237	-0.132311	-0.0354852	0.466786	0.0440961	0.194806	0.0118604
80.1001	0.0698423	0.0795611	-0.119579	-0.129562	-0.0356387	0.489344	0.045359	0.199206	0.0198536
80.2002	0.0393677	0.0589949	-0.111465	-0.122625	-0.0374521	0.511172	0.0449495	0.201562	0.0288606
80.2998	0.0116329	0.0393776	-0.100152	-0.111814	-0.0406551	0.532271	0.0426615	0.201861	0.038753
80.3999	-0.01299	0.0209383	-0.0860032	-0.0975342	-0.0449771	0.55275	0.0383477	0.200204	0.0493309
80.5	-0.0342331	0.00387303	-0.0694443	-0.0802994	-0.0501575	0.572691	0.0319423	0.196775	0.0603905
80.6001	-0.051939	-0.0116663	-0.0509479	-0.0607166	-0.055992	0.592181	0.0234302	0.191793	0.0717132
80.7002	-0.0660772	-0.0255387	-0.0310193	-0.0394382	-0.062292	0.611294	0.0128664	0.185581	0.083082
80.7998	-0.0766888	-0.0375657	-0.0102027	-0.0171642	-0.0688929	0.630137	0.000371838	0.178549	0.0942683
80.8999	-0.0839491	-0.0475974	0.0109437	0.00537109	-0.0756754	0.648777	-0.0138891	0.171079	0.105014
81	-0.0881357	-0.055536	0.0319108	0.0274563	-0.0825404	0.667284	-0.0297005	0.163621	0.115124
81.1001	-0.0896311	-0.0613594	0.0522114	0.0484219	-0.0894217	0.68565	-0.0467486	0.15657	0.124424
81.2002	-0.0889063	-0.0651437	0.0714451	0.0676498	-0.096271	0.703862	-0.0646717	0.150276	0.13274
81.2998	-0.0865002	-0.0670036	0.0892414	0.0845947	-0.103073	0.72185	-0.0830867	0.145064	0.139962
81.3999	-0.0829201	-0.067058	0.105273	0.0987816	-0.109825	0.739497	-0.10159	0.141181	0.145922
81.5	-0.0787048	-0.0655333	0.11929	0.109852	-0.116522	0.756688	-0.1197	0.138847	0.150523
81.6001	-0.0743599	-0.0627192	0.131133	0.117579	-0.123135	0.773228	-0.136942	0.138191	0.153671
81.7002	-0.0703526	-0.0589381	0.140718	0.121796	-0.129611	0.788952	-0.152898	0.139273	0.155312
81.7998	-0.0670252	-0.0545428	0.147999	0.122494	-0.135883	0.803624	-0.167177	0.142103	0.155424
81.8999	-0.0646839	-0.0499423	0.152985	0.119761	-0.141856	0.817028	-0.179419	0.146527	0.154021
82	-0.0634794	-0.0455509	0.15574	0.113791	-0.147446	0.828972	-0.189314	0.152439	0.151144
82.1001	-0.0634546	-0.0417574	0.156354	0.104813	-0.152575	0.839297	-0.196609	0.159642	0.146897
82.2002	-0.0645447	-0.0389576	0.154946	0.093174	-0.157144	0.847866	-0.201116	0.167924	0.141418
82.2998	-0.0665598	-0.0375072	0.151651	0.0792427	-0.161057	0.854546	-0.20271	0.1771	0.134846
82.3999	-0.069231	-0.0377285	0.146616	0.0634403	-0.164215	0.859251	-0.201339	0.186919	0.127404
82.5	-0.0721703	-0.0398907	0.140022	0.0461998	-0.166557	0.861973	-0.197047	0.197175	0.119346
82.6001	-0.0749664	-0.0442092	0.132032	0.0279751	-0.168002	0.86274	-0.189964	0.207647	0.110957
82.7002	-0.077158	-0.0507993	0.122831	0.00923157	-0.168491	0.861668	-0.180284	0.218146	0.102542
82.7998	-0.0783262	-0.0596972	0.112547	-0.00958443	-0.168005	0.858895	-0.168255	0.22855	0.0944371
82.8999	-0.0780964	-0.0708782	0.101299	-0.0280876	-0.166528	0.854615	-0.154163	0.238709	0.0869889
83	-0.0762005	-0.084226	0.0892383	-0.0458908	-0.16406	0.84903	-0.138319	0.248613	0.0804977
83.1001	-0.0724306	-0.0995708	0.0764851	-0.0626373	-0.160637	0.842438	-0.121076	0.258168	0.0752444
83.2002	-0.0667009	-0.116629	0.0631445	-0.0779972	-0.156301	0.835114	-0.102766	0.267292	0.0714228
83.2998	-0.0590467	-0.135042	0.0493045	-0.0916195	-0.15111	0.827408	-0.0837427	0.275944	0.0691988
83.3999	-0.0496302	-0.15437	0.0350098	-0.103245	-0.14512	0.819638	-0.0643335	0.284092	0.0686491
83.5	-0.0387373	-0.17412	0.0203724	-0.112598	-0.138378	0.812138	-0.0448284	0.291768	0.0697441
83.6001	-0.0267878	-0.193712	0.00548051	-0.119465	-0.130961	0.805235	-0.0254838	0.298896	0.0723963
83.7002	-0.0143137	-0.212548	-0.00955748	-0.123671	-0.122959	0.799235	-0.00658351	0.305446	0.0763786
83.7998	-0.00193882	-0.229992	-0.0246476	-0.125055	-0.114489	0.794436	0.0116526	0.311341	0.0814481
83.8999	0.00970268	-0.245418	-0.0396947	-0.123507	-0.105637	0.791123	0.0290321	0.316513	0.087244
84	0.0199757	-0.258241	-0.0545784	-0.118979	-0.0964665	0.789553	0.0453283	0.320894	0.0933993
84.1001	0.0282688	-0.267904	-0.0691553	-0.111496	-0.0870699	0.789912	0.0603255	0.32434	0.0995467
84.2002	0.0340538	-0.273866	-0.0833161	-0.101133	-0.0775828	0.792324	0.0738472	0.326746	0.105259
84.2998	0.036932	-0.275662	-0.0969233	-0.0880184	-0.0681347	0.796896	0.0857311	0.327969	0.110178
84.3999	0.0366144	-0.272928	-0.109856	-0.072361	-0.0588183	0.803677	0.095812	0.327863	0.113991
84.5	0.0329533	-0.265403	-0.121928	-0.0544376	-0.049724	0.812621	0.10398	0.326383	0.116485
84.6001	0.025939	-0.252941	-0.132975	-0.0346241	-0.0409865	0.823609	0.110141	0.323438	0.117536
84.7002	0.0156889	-0.235535	-0.142882	-0.013279	-0.0327348	0.836493	0.11419	0.318941	0.117076
84.7998	0.00247192	-0.213326	-0.151537	0.00921631	-0.0250968	0.851046	0.116054	0.31285	0.115216
84.8999	-0.0133123	-0.186603	-0.158846	0.0324326	-0.018175	0.867024	0.115729	0.305202	0.112129
85	-0.0311022	-0.155806	-0.164716	0.055933	-0.0120749	0.884186	0.113269	0.296134	0.108088
85.1001	-0.0502491	-0.121483	-0.169063	0.0792618	-0.00690786	0.902199	0.108746	0.285772	0.10344
85.2002	-0.0700455	-0.0843252	-0.171817	0.101999	-0.00275938	0.920765	0.102306	0.274254	0.0985606
85.2998	-0.0898046	-0.045137	-0.172956	0.123751	0.000341496	0.939518	0.0941625	0.261867	0.0938838
85.3999	-0.108845	-0.00478522	-0.172556	0.144217	0.00236281	0.958145	0.0846016	0.248863	0.089793
85.5	-0.126494	0.0357791	-0.17074	0.163122	0.00325688	0.976363	0.0739846	0.235556	0.0866652
85.6001	-0.142104	0.0755748	-0.167661	0.180269	0.00299748	0.993918	0.0626849	0.222198	0.0847998
85.7002	-0.155113	0.113611	-0.163473	0.195515	0.00155838	1.01062	0.0511007	0.209102	0.0844169
85.7998	-0.1651	0.148942	-0.158399	0.20875	-0.00104992	1.02637	0.0396606	0.196533	0.0856466
85.8999	-0.171753	0.180685	-0.152695	0.219923	-0.00482074	1.04112	0.0288262	0.184719	0.0885177
86	-0.174899	0.208036	-0.146622	0.229063	-0.00971071	1.05482	0.0190415	0.173812	0.0929563
86.1001	-0.174438	0.23033	-0.140493	0.236219	-0.0156383	1.06751	0.010748	0.163864	0.0987546
86.2002	-0.170391	0.247032	-0.134615	0.241457	-0.0225166	1.07926	0.00435144	0.154848	0.105597
86.2998	-0.16291	0.257765	-0.129292	0.244833	-0.0302509	1.09022	0.000208267	0.146729	0.113128
86.3999	-0.152256	0.262321	-0.124765	0.246342	-0.0386905	1.10051	-0.00140957	0.139339	0.120929
86.5	-0.1388	0.260652	-0.121188	0.246033	-0.0476689	1.11031	-0.000291792	0.132511	0.128567
86.6001	-0.122932	0.252935	-0.118693	0.243914	-0.0569848	1.11972	0.003733	0.125989	0.135582
86.7002	-0.105123	0.239513	-0.117367	0.240011	-0.0663761	1.12882	0.010771	0.119447	0.141566
86.7998	-0.0858679	0.220847	-0.117225	0.234352	-0.0755381	1.13765	0.0208473	0.112587	0.146173
86.8999	-0.0657139	0.197541	-0.118232	0.226913	-0.084175	1.14622	0.0339414	0.105076	0.149099
87	-0.0452127	0.170284	-0.120246	0.217712	-0.0919828	1.15444	0.0499547	0.0966998	0.150113
87.1001	-0.0249224	0.139847	-0.123084	0.206743	-0.0986585	1.16213	0.0687508	0.0872295	0.149053
87.2002	-0.00540257	0.107047	-0.12653	0.194012	-0.10392	1.16907	0.090162	0.0764883	0.145828
87.2998	0.012826	0.072747	-0.130381	0.179581	-0.107474	1.17489	0.113975	0.064442	0.140443
87.3999	0.0293055	0.037769	-0.134407	0.163584	-0.10906	1.1792	0.139897	0.050998	0.13302
87.5	0.0436125	0.00290441	-0.138375	0.14616	-0.10845	1.18157	0.167613	0.0362885	0.123731
87.6001	0.0553961	-0.0310971	-0.142106	0.127535	-0.105503	1.18153	0.196803	0.0204052	0.112789
87.7002	0.064353	-0.0636081	-0.145471	0.107946	-0.100138	1.17855	0.227138	0.0035037	0.100467
87.7998	0.0702467	-0.094103	-0.148401	0.0876923	-0.0923356	1.17217	0.258239	-0.0142302	0.087049
87.8999	0.072916	-0.122147	-0.150887	0.0670986	-0.082147	1.16188	0.289703	-0.0326141	0.0728047
88	0.0722847	-0.1474	-0.15296	0.046505	-0.0696797	1.14729	0.3211	-0.0513573	0.0580359
88.1001	0.0683498	-0.169625	-0.154709	0.0262585	-0.0551256	1.12805	0.351978	-0.070279	0.0429902
88.2002	0.061223	-0.188683	-0.156291	0.00672531	-0.0387692	1.10393	0.381905	-0.0891581	0.0279002
88.2998	0.0511389	-0.204541	-0.157884	-0.0117512	-0.0209164	1.07481	0.410465	-0.107784	0.0129421
88.3999	0.0383797	-0.217251	-0.159693	-0.0288677	-0.00187341	1.04068	0.437235	-0.126056	-0.00174165
88.5	0.0233307	-0.226894	-0.161908	-0.044342	0.0180455	1.0017	0.461759	-0.143816	-0.0160811
88.6001	0.00644016	-0.233622	-0.164722	-0.0580235	0.0384785	0.958187	0.483615	-0.160925	-0.0300298
88.7002	-0.0117693	-0.237653	-0.16826	-0.0697556	0.0590402	0.910626	0.502414	-0.177278	-0.0436132
88.7998	-0.0306969	-0.239255	-0.172591	-0.0794868	0.0793205	0.859669	0.517811	-0.19273	-0.0568614
88.8999	-0.0496941	-0.238705	-0.177757	-0.0872154	0.0989428	0.806071	0.529568	-0.207165	-0.0698242
89	-0.0681038	-0.236282	-0.183773	-0.0929794	0.117534	0.750716	0.537509	-0.220408	-0.0826359
89.1001	-0.085227	-0.232239	-0.190599	-0.0968666	0.134714	0.694561	0.541497	-0.232284	-0.0954123
89.2002	-0.100363	-0.226822	-0.19812	-0.0990009	0.150138	0.638642	0.541484	-0.242589	-0.108281
89.2998	-0.112864	-0.220303	-0.206157	-0.0995159	0.163483	0.584027	0.537522	-0.25104	-0.121374
89.3999	-0.122146	-0.212956	-0.214475	-0.0985546	0.174444	0.531767	0.529756	-0.257458	-0.134775
89.5	-0.12773	-0.204998	-0.222876	-0.0962486	0.182755	0.482848	0.518405	-0.261561	-0.148569
89.6001	-0.129196	-0.196604	-0.231137	-0.0927067	0.188166	0.438197	0.503799	-0.263138	-0.162787
89.7002	-0.126223	-0.18792	-0.23902	-0.0880604	0.190411	0.39861	0.486363	-0.262029	-0.177459
89.7998	-0.118594	-0.179063	-0.246296	-0.0824013	0.189255	0.364708	0.466581	-0.258081	-0.192503
89.8999	-0.106215	-0.17009	-0.252786	-0.0757675	0.184561	0.336914	0.445009	-0.251238	-0.207839
90	-0.0891352	-0.161013	-0.258338	-0.0681744	0.176289	0.315417	0.422248	-0.241519	-0.223327
90.1001	-0.0675535	-0.151826	-0.262801	-0.0596199	0.164494	0.300206	0.398928	-0.229038	-0.23878
90.2002	-0.0417738	-0.142506	-0.26605	-0.0501137	0.149301	0.29105	0.375698	-0.214012	-0.25398
90.2998	-0.0122061	-0.133024	-0.268021	-0.0396481	0.130925	0.287589	0.353193	-0.196736	-0.26863
90.3999	0.0206261	-0.123339	-0.268725	-0.0282135	0.109704	0.289175	0.332012	-0.177684	-0.282454
90.5	0.0560827	-0.113386	-0.268179	-0.0158234	0.0860577	0.295046	0.312738	-0.157265	-0.295175
90.6001	0.0934401	-0.103106	-0.266438	-0.00256157	0.0604878	0.304228	0.295917	-0.136039	-0.306544
90.7002	0.131928	-0.0924915	-0.263567	0.011446	0.0335852	0.315693	0.282007	-0.114621	-0.316311
90.7998	0.170785	-0.0815607	-0.259617	0.0260506	0.005982	0.328366	0.271394	-0.0936044	-0.324264
90.8999	0.209227	-0.0703551	-0.254633	0.0410423	-0.0216712	0.3412	0.264385	-0.073619	-0.330263
91	0.246475	-0.0589198	-0.24867	0.0561981	-0.048665	0.353207	0.26117	-0.0552201	-0.334158
91.1001	0.281761	-0.0473376	-0.241816	0.0712261	-0.0743059	0.363484	0.261821	-0.0389218	-0.335895
91.2002	0.314366	-0.0357182	-0.234178	0.0857925	-0.097979	0.371273	0.266317	-0.0252159	-0.335475
91.2998	0.343628	-0.0242314	-0.225834	0.0995922	-0.119165	0.375939	0.274536	-0.0144177	-0.332967
91.3999	0.369018	-0.0130744	-0.216847	0.112286	-0.137424	0.377072	0.286217	-0.00684365	-0.328506
91.5	0.390079	-0.00242018	-0.207251	0.123514	-0.152469	0.37447	0.30101	-0.00260617	-0.322269
91.6001	0.406518	0.00758366	-0.197075	0.132999	-0.164132	0.368086	0.318456	-0.00175941	-0.314476
91.7002	0.418139	0.0167988	-0.186389	0.140465	-0.172359	0.358061	0.338044	-0.00425367	-0.305393
91.7998	0.424864	0.0251385	-0.175277	0.145702	-0.177263	0.34474	0.359169	-0.00987337	-0.295357
91.8999	0.426695	0.0325542	-0.163819	0.148573	-0.179133	0.3286	0.381205	-0.0184211	-0.284686
92	0.423818	0.0390523	-0.152065	0.149004	-0.178363	0.310229	0.403544	-0.0294984	-0.273715
92.1001	0.416523	0.0446645	-0.140068	0.147013	-0.175442	0.290284	0.425532	-0.0427156	-0.262816
92.2002	0.405212	0.0494746	-0.12786	0.1427	-0.170931	0.269465	0.446512	-0.0576389	-0.252311
92.2998	0.390359	0.0536162	-0.115506	0.136215	-0.165459	0.248497	0.465867	-0.073761	-0.242521
92.3999	0.372528	0.0572468	-0.103105	0.127789	-0.159715	0.228072	0.483075	-0.0906446	-0.233726
92.5	0.352325	0.0605874	-0.0907698	0.117718	-0.154368	0.208874	0.497664	-0.107801	-0.226228
92.6001	0.330425	0.0638325	-0.0785839	0.106325	-0.150014	0.191494	0.509267	-0.124871	-0.220299
92.7002	0.307512	0.0671759	-0.0666315	0.0940304	-0.14715	0.176443	0.517669	-0.141486	-0.216133
92.7998	0.284284	0.0707644	-0.0550091	0.0812397	-0.146202	0.164107	0.522725	-0.157386	-0.213929
92.8999	0.261388	0.0747125	-0.043823	0.0684052	-0.147521	0.15474	0.524382	-0.172437	-0.213804
93	0.239414	0.0791011	-0.0331919	0.056015	-0.151316	0.14851	0.522733	-0.18648	-0.215816
93.1001	0.218891	0.0839389	-0.0232509	0.0445423	-0.157642	0.145516	0.517997	-0.19948	-0.219956
93.2002	0.20029	0.0891963	-0.0141406	0.0344257	-0.166423	0.145716	0.510472	-0.211507	-0.22619
93.2998	0.183996	0.0947675	-0.00602314	0.026022	-0.177482	0.148991	0.500527	-0.222703	-0.234437
93.3999	0.170299	0.100533	0.000953552	0.019701	-0.190499	0.155096	0.48859	-0.233335	-0.244531
93.5	0.159352	0.106314	0.0066571	0.0157413	-0.20506	0.163718	0.475129	-0.243635	-0.256303
93.6001	0.151216	0.111922	0.0109462	0.0144253	-0.220662	0.174445	0.460641	-0.253941	-0.269481
93.7002	0.145908	0.117151	0.013674	0.0159149	-0.236722	0.186833	0.445603	-0.26466	-0.283758
93.7998	0.143321	0.121808	0.014737	0.0203037	-0.252651	0.200365	0.430476	-0.276102	-0.29876
93.8999	0.143283	0.12573	0.0140698	0.027586	-0.26786	0.214558	0.415673	-0.28864	-0.314086
94	0.145531	0.128784	0.0116555	0.0376644	-0.281802	0.228873	0.401547	-0.302534	-0.329324
94.1001	0.149763	0.130875	0.00751715	0.0503597	-0.293961	0.242779	0.38837	-0.318025	-0.344002
94.2002	0.155633	0.131976	0.00170062	0.0654259	-0.303846	0.255742	0.376363	-0.335301	-0.357641
94.2998	0.16281	0.132077	-0.00569899	0.0825481	-0.311016	0.267237	0.365707	-0.354453	-0.369767
94.3999	0.170978	0.131254	-0.0145751	0.101377	-0.315126	0.276858	0.35651	-0.375521	-0.379904
94.5	0.179857	0.129588	-0.0247544	0.121414	-0.315966	0.284237	0.348777	-0.398412	-0.387631
94.6001	0.189123	0.1272	-0.036009	0.142183	-0.313433	0.289116	0.342415	-0.422919	-0.392522
94.7002	0.198514	0.124279	-0.0480595	0.163149	-0.307546	0.291319	0.337319	-0.448757	-0.394245
94.7998	0.207815	0.120991	-0.0605936	0.183754	-0.298414	0.290772	0.333371	-0.475465	-0.392522
94.8999	0.21688	0.117487	-0.0732962	0.203514	-0.286182	0.28752	0.330406	-0.502598	-0.387116
95	0.225615	0.113902	-0.0858801	0.221937	-0.271093	0.281678	0.328251	-0.529627	-0.377912
95.1001	0.233998	0.110363	-0.0980042	0.238605	-0.253513	0.27348	0.326729	-0.555986	-0.364878
95.2002	0.242037	0.106973	-0.109321	0.253149	-0.233889	0.263277	0.325629	-0.581044	-0.348124
95.2998	0.249772	0.103825	-0.119498	0.265226	-0.212723	0.251498	0.324789	-0.604116	-0.327868
95.3999	0.257299	0.100998	-0.128231	0.274611	-0.190554	0.238585	0.324125	-0.62459	-0.304468
95.5	0.26471	0.0985327	-0.135187	0.281145	-0.167956	0.225045	0.323548	-0.641858	-0.278397
95.6001	0.272104	0.096443	-0.140016	0.284746	-0.145521	0.211415	0.322941	-0.655341	-0.250225
95.7002	0.279631	0.0947243	-0.142412	0.285454	-0.123816	0.198182	0.322218	-0.664576	-0.22061
95.7998	0.287384	0.0933813	-0.142092	0.283367	-0.10337	0.185828	0.321358	-0.669114	-0.190289
95.8999	0.295444	0.0923932	-0.138855	0.278694	-0.0846886	0.174746	0.320335	-0.668698	-0.159991
96	0.303871	0.0917112	-0.132532	0.271688	-0.068211	0.165265	0.319156	-0.66308	-0.130482
96.1001	0.312686	0.0913333	-0.123009	0.262695	-0.0542864	0.157635	0.31781	-0.652149	-0.102488
96.2002	0.32186	0.0912749	-0.110195	0.252068	-0.0431594	0.152037	0.316274	-0.635958	-0.0767245
96.2998	0.331327	0.0915808	-0.0940927	0.240202	-0.0350107	0.148602	0.314507	-0.614578	-0.0537829
96.3999	0.340982	0.0922808	-0.0748117	0.227503	-0.0299224	0.147339	0.312501	-0.588317	-0.0341363
96.5	0.350677	0.0934317	-0.052572	0.214405	-0.0278353	0.148198	0.310273	-0.5575	-0.0181494
96.6001	0.36023	0.0951214	-0.0277142	0.201323	-0.0285849	0.151057	0.307813	-0.522596	-0.00603127
96.7002	0.369427	0.0974376	-0.00068278	0.188641	-0.0319256	0.155743	0.305083	-0.484165	0.0022254
96.7998	0.378028	0.100476	0.0280053	0.176672	-0.0375137	0.162028	0.302015	-0.442787	0.00671721
96.8999	0.385777	0.104345	0.0577215	0.165712	-0.0449452	0.169667	0.298545	-0.399148	0.00773263
97	0.392434	0.109174	0.0877712	0.155977	-0.0537523	0.178414	0.294632	-0.353951	0.00570822
97.1001	0.397736	0.115126	0.117378	0.147629	-0.0634355	0.188054	0.290221	-0.307982	0.00115681
97.2002	0.401447	0.122348	0.145732	0.140785	-0.073542	0.198344	0.285267	-0.262001	-0.00525832
97.2998	0.403382	0.130996	0.172047	0.135429	-0.0836348	0.209036	0.279747	-0.216762	-0.0128458
97.3999	0.403411	0.141199	0.195535	0.131496	-0.0933065	0.219914	0.273676	-0.172982	-0.0208824
97.5	0.401449	0.153058	0.215489	0.128857	-0.102219	0.230772	0.267079	-0.131373	-0.0286479
97.6001	0.397458	0.166605	0.23128	0.127333	-0.110072	0.241438	0.259956	-0.0925919	-0.0354738
97.7002	0.391416	0.181848	0.242377	0.126684	-0.116618	0.251751	0.252357	-0.0572634	-0.040705
97.7998	0.383402	0.198753	0.24841	0.126648	-0.1217	0.261582	0.244334	-0.0258042	-0.0438616
97.8999	0.37353	0.217205	0.249155	0.126913	-0.125239	0.270792	0.235936	0.00137652	-0.0445125
98	0.36198	0.236993	0.244571	0.127153	-0.12725	0.279274	0.227201	0.0240371	-0.0423868
98.1001	0.34896	0.257842	0.234735	0.127054	-0.127799	0.286919	0.218146	0.042005	-0.0372984
98.2002	0.33473	0.27942	0.219879	0.126406	-0.126991	0.293602	0.208816	0.0551952	-0.0292211
98.2998	0.319587	0.301306	0.200424	0.124954	-0.124978	0.299239	0.199266	0.0637085	-0.0182617
98.3999	0.303852	0.323015	0.176898	0.122522	-0.121959	0.303723	0.189529	0.0677498	-0.0045836
98.5	0.287862	0.344015	0.149908	0.119017	-0.118127	0.306998	0.179585	0.0676122	0.0114872
98.6001	0.271897	0.363748	0.120135	0.114378	-0.113662	0.309012	0.169389	0.0637024	0.0295594
98.7002	0.256199	0.381644	0.0883114	0.108677	-0.108726	0.309704	0.158896	0.0564813	0.0491617
98.7998	0.240963	0.39715	0.0551745	0.102022	-0.103442	0.309058	0.148025	0.0465303	0.0697858
98.8999	0.226383	0.409776	0.0214506	0.0945549	-0.0979094	0.307022	0.136689	0.0344522	0.0909283
99	0.212578	0.419084	-0.0121952	0.0864697	-0.0922212	0.303593	0.124834	0.020887	0.111988
99.1001	0.199629	0.424721	-0.0451104	0.0780334	-0.0864405	0.298804	0.11242	0.00649117	0.132412
99.2002	0.187529	0.426481	-0.0767182	0.0695057	-0.0806026	0.29266	0.0993986	-0.00816106	0.151713
99.2998	0.176193	0.424312	-0.106503	0.0611553	-0.0747027	0.285208	0.0857451	-0.0224207	0.169396
99.3999	0.165476	0.418327	-0.134103	0.0532684	-0.0687431	0.27652	0.0714701	-0.0357791	0.18503
99.5	0.155215	0.408742	-0.159248	0.0460796	-0.0626673	0.26669	0.0565829	-0.0477554	0.198201
99.6001	0.145234	0.395903	-0.181736	0.0397396	-0.0564508	0.255804	0.0411071	-0.0579499	0.208563
99.7002	0.135332	0.380271	-0.201439	0.0343876	-0.0501017	0.24399	0.0251187	-0.066062	0.215886
99.7998	0.12532	0.362416	-0.218275	0.0300751	-0.0436525	0.231333	0.00872458	-0.0717804	0.220017
99.8999	0.115033	0.342975	-0.232252	0.0267563	-0.0371532	0.217936	-0.00798049	-0.074939	0.220888
100	0.104317	0.322638	-0.243422	0.0244083	-0.0307011	0.203921	-0.0249004	-0.0754422	0.218458
100.1	0.0930653	0.302108	-0.251917	0.0228825	-0.0244178	0.189421	-0.041927	-0.0732979	0.212811
100.2	0.0812082	0.28207	-0.25786	0.0220547	-0.0184683	0.174561	-0.0589536	-0.0685715	0.204091
100.3	0.0687284	0.263127	-0.261383	0.0217438	-0.01304	0.159418	-0.0758965	-0.0613218	0.192528
100.4	0.0556984	0.245782	-0.262573	0.0217934	-0.00832597	0.144095	-0.092687	-0.0517418	0.178389
100.5	0.0422525	0.230384	-0.26154	0.0220585	-0.00451652	0.128661	-0.109255	-0.0399845	0.162019
100.6	0.0285769	0.217158	-0.258417	0.0223961	-0.00180236	0.113217	-0.125522	-0.0262599	0.143831
100.7	0.0148582	0.206213	-0.253319	0.0226498	-0.000386635	0.0978798	-0.141424	-0.0108263	0.124249
100.8	0.00132179	0.197504	-0.246331	0.0227566	-0.000385681	0.0827984	-0.156893	0.00608883	0.103743
100.9	-0.0117798	0.19079	-0.237556	0.0227146	-0.00184719	0.0680508	-0.171893	0.0241765	0.0827625
101	-0.0241928	0.185707	-0.227083	0.0225792	-0.00478593	0.0537437	-0.186388	0.0431282	0.0618174
101.1	-0.0356569	0.181786	-0.214994	0.0224495	-0.00916616	0.0399784	-0.200329	0.0626541	0.0413508
101.2	-0.045929	0.178502	-0.201341	0.0224476	-0.0148501	0.0268845	-0.213643	0.0825046	0.0218396
101.3	-0.0548058	0.175255	-0.186215	0.0227222	-0.0216216	0.014624	-0.226218	0.102413	0.00370526
101.4	-0.0621195	0.171437	-0.169738	0.0234623	-0.0292105	0.00329246	-0.237937	0.122108	-0.0126741
101.5	-0.0677118	0.166436	-0.152059	0.0248203	-0.0372538	-0.0070015	-0.248676	0.141348	-0.026938
101.6	-0.0714521	0.159678	-0.133369	0.0269661	-0.0453591	-0.0161778	-0.258292	0.159891	-0.038806
101.7	-0.0732841	0.150686	-0.113855	0.0300293	-0.0531568	-0.0241657	-0.266623	0.1775	-0.048063
101.8	-0.0731878	0.139098	-0.0937601	0.0340347	-0.0602516	-0.0309292	-0.273528	0.193975	-0.0545287
101.9	-0.071147	0.124649	-0.0733854	0.0390091	-0.0662736	-0.0364471	-0.278837	0.20914	-0.0581434
102	-0.0671749	0.107237	-0.0530916	0.0448723	-0.0709075	-0.0406586	-0.282381	0.222876	-0.05885
102.1	-0.0612955	0.0868845	-0.0332316	0.0514641	-0.073883	-0.0435101	-0.283994	0.235064	-0.0567062
102.2	-0.0535555	0.0637863	-0.0141865	0.0585785	-0.0750164	-0.0449844	-0.283529	0.245657	-0.0518165
102.3	-0.0440321	0.0382601	0.00367536	0.0659351	-0.0742444	-0.0450417	-0.280858	0.254627	-0.0443571
102.4	-0.0328465	0.0107208	0.0199905	0.0731697	-0.0716113	-0.0436493	-0.275861	0.261937	-0.0345986
102.5	-0.0201159	-0.0183007	0.0343894	0.0798759	-0.0672444	-0.0407349	-0.268451	0.267592	-0.022809
102.6	-0.00594711	-0.0482119	0.0465217	0.0856152	-0.0613374	-0.0362316	-0.258538	0.271559	-0.00936055
102.7	0.0095129	-0.0784035	0.0560904	0.0899372	-0.0541333	-0.0299965	-0.246088	0.273851	0.00535846
102.8	0.0260649	-0.108216	0.0628626	0.0924187	-0.0459603	-0.0219208	-0.231112	0.274464	0.0209086
102.9	0.0434551	-0.136984	0.0667102	0.0925922	-0.0372209	-0.0118652	-0.213666	0.273383	0.0368164
103	0.0614176	-0.16409	0.0676216	0.0900612	-0.0283617	0.000337977	-0.193824	0.270618	0.0526319
103.1	0.07969	-0.189	0.0656005	0.0844822	-0.0197949	0.0148548	-0.171672	0.266134	0.0679028
103.2	0.0979643	-0.211279	0.0607668	0.0756054	-0.0119151	0.0318493	-0.147362	0.259876	0.0822234
103.3	0.115865	-0.230548	0.0533529	0.0632992	-0.00508157	0.0514378	-0.121118	0.251793	0.0951846
103.4	0.133018	-0.24655	0.0436552	0.0475159	0.000411114	0.0737099	-0.0932131	0.241783	0.106435
103.5	0.149026	-0.25917	0.0320749	0.0283089	0.00434502	0.0986904	-0.0639104	0.229764	0.115664
103.6	0.163513	-0.268386	0.019008	0.00582314	0.00657137	0.126353	-0.0335184	0.215646	0.122639
103.7	0.176113	-0.274246	0.00490735	-0.019701	0.00700816	0.156567	-0.00242108	0.199347	0.127178
103.8	0.186492	-0.276939	-0.00975531	-0.0479298	0.00563916	0.189146	0.0289718	0.180854	0.129136
103.9	0.194345	-0.276739	-0.0245063	-0.0783958	0.00254544	0.223824	0.0602634	0.160158	0.128436
104	0.19941	-0.273968	-0.0388724	-0.110563	-0.00215952	0.260252	0.0910152	0.137331	0.125072
104.1	0.201464	-0.269043	-0.0524247	-0.143875	-0.00828306	0.29801	0.120783	0.112504	0.119106
104.2	0.20037	-0.262431	-0.0648179	-0.177702	-0.0155949	0.336607	0.14911	0.0858698	0.110661
104.3	0.196102	-0.254604	-0.075765	-0.211414	-0.0238914	0.375473	0.175529	0.0577419	0.0998855
104.4	0.188693	-0.246037	-0.0851026	-0.244383	-0.0329575	0.414008	0.199557	0.0284824	0.0869684
104.5	0.178244	-0.237171	-0.0926827	-0.275984	-0.0426234	0.451596	0.22077	-0.00146866	0.0721526
104.6	0.164921	-0.228432	-0.0984482	-0.305643	-0.0527262	0.487606	0.23882	-0.031639	0.05568
104.7	0.148991	-0.220191	-0.102433	-0.332844	-0.0631422	0.521399	0.253412	-0.0615388	0.0378032
104.8	0.13079	-0.212768	-0.104761	-0.357109	-0.0738019	0.552365	0.264294	-0.0906021	0.0188246
104.9	0.110683	-0.20638	-0.105591	-0.378069	-0.0846891	0.579905	0.271274	-0.118309	-0.000967026
105	0.0890703	-0.201185	-0.105116	-0.395405	-0.095848	0.603499	0.27423	-0.144103	-0.0212786
105.1	0.0663605	-0.197282	-0.103529	-0.408936	-0.107364	0.62262	0.273133	-0.167542	-0.0418034
105.2	0.0430002	-0.194682	-0.101084	-0.418509	-0.119313	0.636887	0.268082	-0.188286	-0.0622826
105.3	0.0194139	-0.193308	-0.0980561	-0.424067	-0.1318	0.645972	0.259295	-0.206029	-0.0824523
105.4	-0.00401878	-0.193019	-0.0946869	-0.425634	-0.144922	0.649674	0.247061	-0.220609	-0.102074
105.5	-0.0269222	-0.193605	-0.0911801	-0.423361	-0.158783	0.647824	0.231753	-0.231894	-0.120929
105.6	-0.0489521	-0.194825	-0.0877069	-0.417444	-0.173531	0.64033	0.213838	-0.23992	-0.138831
105.7	-0.0697994	-0.196425	-0.0844049	-0.408133	-0.189243	0.627238	0.193854	-0.244786	-0.155675
105.8	-0.0891609	-0.198137	-0.081391	-0.3957	-0.205934	0.608664	0.172419	-0.246765	-0.171358
105.9	-0.106827	-0.199703	-0.0787303	-0.380503	-0.223576	0.584891	0.150178	-0.246222	-0.185857
106	-0.122661	-0.200858	-0.0764427	-0.362959	-0.242082	0.556216	0.127798	-0.243489	-0.199169
106.1	-0.136556	-0.201354	-0.074498	-0.343508	-0.261345	0.523062	0.10593	-0.239001	-0.211365
106.2	-0.148427	-0.201015	-0.072823	-0.322605	-0.281188	0.485892	0.0851542	-0.233213	-0.222563
106.3	-0.158256	-0.19971	-0.0713686	-0.300726	-0.301378	0.445256	0.0659925	-0.226585	-0.232912
106.4	-0.166041	-0.197359	-0.0700419	-0.27832	-0.321631	0.401764	0.0489242	-0.2196	-0.242638
106.5	-0.171826	-0.193975	-0.0687326	-0.255829	-0.341635	0.356034	0.034341	-0.212654	-0.251947
106.6	-0.175671	-0.189612	-0.0673293	-0.233707	-0.36108	0.30876	0.0225108	-0.206092	-0.261054
106.7	-0.177679	-0.184346	-0.0657326	-0.212391	-0.379638	0.260624	0.0135553	-0.200181	-0.270209
106.8	-0.177997	-0.178322	-0.0638281	-0.192284	-0.396977	0.212353	0.00749231	-0.195129	-0.279626
106.9	-0.17679	-0.17176	-0.061492	-0.173704	-0.412783	0.164633	0.00420029	-0.191055	-0.289506
107	-0.174234	-0.164895	-0.058637	-0.156973	-0.426758	0.118168	0.00345467	-0.187973	-0.299985
107.1	-0.170504	-0.157965	-0.0552052	-0.142342	-0.438616	0.0736565	0.00495063	-0.185853	-0.31117
107.2	-0.165764	-0.151258	-0.0511503	-0.130074	-0.448116	0.0317329	0.00832195	-0.18456	-0.32312
107.3	-0.160182	-0.145031	-0.0464128	-0.120329	-0.455056	-0.00699387	0.0131607	-0.183922	-0.335781
107.4	-0.153905	-0.139513	-0.0409794	-0.113207	-0.459286	-0.0420242	0.0190296	-0.183719	-0.349059
107.5	-0.147068	-0.134927	-0.0348619	-0.108759	-0.46074	-0.0728928	0.0255068	-0.18367	-0.362757
107.6	-0.1398	-0.131455	-0.0280908	-0.107002	-0.459371	-0.099239	0.0321939	-0.183511	-0.376638
107.7	-0.132238	-0.129186	-0.0207196	-0.107929	-0.455177	-0.120786	0.0386831	-0.183016	-0.390447
107.8	-0.124469	-0.128214	-0.01281	-0.111414	-0.448195	-0.137336	0.044664	-0.181953	-0.403825
107.9	-0.11656	-0.128609	-0.00445446	-0.117268	-0.438556	-0.148815	0.049929	-0.180151	-0.416444
108	-0.108573	-0.130424	0.00425336	-0.12525	-0.426459	-0.15525	0.0543601	-0.177446	-0.427932
108.1	-0.10052	-0.133674	0.0131823	-0.135088	-0.412123	-0.156795	0.0579269	-0.173757	-0.437939
108.2	-0.0924091	-0.138341	0.0222267	-0.146484	-0.395835	-0.153703	0.0606875	-0.169117	-0.446109
108.3	-0.0842695	-0.144347	0.0312362	-0.159088	-0.377935	-0.146291	0.0627559	-0.163628	-0.45213
108.4	-0.0761309	-0.151594	0.0400282	-0.172461	-0.358777	-0.134994	0.0642889	-0.157483	-0.455753
108.5	-0.0680428	-0.159942	0.0484744	-0.18618	-0.338766	-0.120254	0.0655065	-0.15093	-0.456767
108.6	-0.0600805	-0.169251	0.0564949	-0.199781	-0.318328	-0.102609	0.0666678	-0.144293	-0.455055
108.7	-0.0523643	-0.17936	0.0639822	-0.212797	-0.297867	-0.0826126	0.0680135	-0.137987	-0.45055
108.8	-0.045042	-0.190095	0.0708601	-0.224771	-0.277794	-0.0608326	0.0698013	-0.132377	-0.443261
108.9	-0.038229	-0.201278	0.0770832	-0.235302	-0.258485	-0.0378033	0.0722534	-0.127915	-0.433279
109	-0.0320711	-0.212696	0.0826382	-0.244061	-0.240245	-0.0140301	0.0755334	-0.124989	-0.420779
109.1	-0.0266905	-0.224147	0.0874784	-0.250748	-0.223345	0.00999679	0.079763	-0.124011	-0.405962
109.2	-0.0222244	-0.235425	0.0915411	-0.25511	-0.207994	0.0339092	0.0849901	-0.125374	-0.389076
109.3	-0.0187693	-0.246315	0.094794	-0.257015	-0.194372	0.0573811	0.0911571	-0.129298	-0.370422
109.4	-0.0164185	-0.256612	0.0972323	-0.256435	-0.18255	0.0801357	0.098193	-0.135983	-0.350307
109.5	-0.015213	-0.266107	0.0988644	-0.253433	-0.172564	0.101981	0.105992	-0.145482	-0.32905
109.6	-0.0151691	-0.274592	0.0996653	-0.248198	-0.164359	0.122818	0.114378	-0.157816	-0.306964
109.7	-0.016202	-0.281894	0.0995848	-0.240948	-0.157816	0.142588	0.1231	-0.172872	-0.284356
109.8	-0.0181589	-0.287861	0.0985643	-0.231998	-0.152806	0.161272	0.131887	-0.19041	-0.261492
109.9	-0.0208569	-0.292379	0.0965101	-0.221739	-0.149147	0.178894	0.140448	-0.210123	-0.238614
110	-0.0240774	-0.29537	0.0933064	-0.210567	-0.146647	0.195464	0.148551	-0.231573	-0.215939
110.1	-0.0275679	-0.296771	0.088858	-0.198858	-0.145134	0.211043	0.155974	-0.25427	-0.193633
110.2	-0.0310297	-0.29656	0.0830662	-0.186998	-0.144436	0.225706	0.162516	-0.277684	-0.171818
110.3	-0.0341768	-0.294749	0.0758543	-0.175335	-0.144389	0.239529	0.168007	-0.301203	-0.150609
110.4	-0.0367031	-0.291406	0.0671595	-0.164152	-0.144872	0.252514	0.172337	-0.32426	-0.130039
110.5	-0.0383425	-0.286635	0.0570066	-0.153643	-0.145816	0.264679	0.175457	-0.346216	-0.110165
110.6	-0.0388918	-0.280534	0.0454776	-0.14393	-0.147213	0.276019	0.177345	-0.366587	-0.0909832
110.7	-0.0381842	-0.273193	0.0327482	-0.135015	-0.149074	0.286478	0.178045	-0.384916	-0.0724936
110.8	-0.0361147	-0.264717	0.0190795	-0.126837	-0.15139	0.295998	0.177677	-0.400805	-0.0546794
110.9	-0.0326786	-0.255264	0.00475541	-0.119255	-0.154137	0.304474	0.176394	-0.413992	-0.0375266
111	-0.0279799	-0.244988	-0.00988421	-0.112085	-0.157308	0.3118	0.174337	-0.424259	-0.0210464
111.1	-0.022172	-0.234017	-0.024412	-0.105095	-0.160883	0.317822	0.171656	-0.431563	-0.00520039
111.2	-0.0154543	-0.222458	-0.0383409	-0.0980434	-0.164828	0.322447	0.168519	-0.435937	0.00998974
111.3	-0.00806427	-0.210427	-0.0511354	-0.0906792	-0.169074	0.325592	0.165072	-0.437503	0.0245047
111.4	-0.000265121	-0.198012	-0.0623078	-0.0828114	-0.173507	0.327177	0.161446	-0.43649	0.0383079
111.5	0.00761318	-0.185284	-0.0713595	-0.0742683	-0.177998	0.327132	0.157744	-0.433202	0.0512927
111.6	0.0152559	-0.172352	-0.0778247	-0.0649548	-0.182373	0.3254	0.154053	-0.428042	0.063386
111.7	0.0223637	-0.15932	-0.0813294	-0.0548191	-0.186413	0.322003	0.150469	-0.421412	0.0744648
111.8	0.0286722	-0.14628	-0.0816345	-0.0438957	-0.189872	0.317015	0.147041	-0.413736	0.0844593
111.9	0.0339279	-0.133288	-0.0786123	-0.0323353	-0.192544	0.310545	0.14379	-0.40547	0.0932152
112	0.0379581	-0.120407	-0.0722107	-0.0203323	-0.194227	0.302777	0.140723	-0.39701	0.100577
112.1	0.0406742	-0.107687	-0.0625195	-0.00813293	-0.194751	0.293936	0.137884	-0.388754	0.106346
112.2	0.0420151	-0.0951674	-0.0497475	0.00389862	-0.19398	0.284312	0.135348	-0.381087	0.110394
112.3	0.0419531	-0.0828659	-0.0342388	0.0154018	-0.191828	0.274252	0.133231	-0.374286	0.112575
112.4	0.0405836	-0.0707628	-0.0164442	0.0259972	-0.188304	0.264138	0.131672	-0.368598	0.112773
112.5	0.0380487	-0.0588209	0.00308317	0.0353146	-0.183461	0.254345	0.130812	-0.364104	0.1109
112.6	0.0345268	-0.0469744	0.0237466	0.0430603	-0.177435	0.245276	0.130798	-0.3609	0.106921
112.7	0.0302019	-0.0351135	0.0449021	0.048914	-0.170456	0.237318	0.13181	-0.358988	0.100849
112.8	0.0252838	-0.0230887	0.065904	0.0526562	-0.162813	0.230791	0.134071	-0.35827	0.0927901
112.9	0.0200348	-0.0107653	0.0861077	0.0541115	-0.154799	0.225962	0.137798	-0.358667	0.0829039
113	0.0147333	0.00202731	0.104926	0.0531616	-0.146731	0.223069	0.143185	-0.35996	0.0714247
113.1	0.00964451	0.0154941	0.121781	0.0497704	-0.139009	0.222247	0.150394	-0.361907	0.0586841
113.2	0.00501251	0.0298345	0.136201	0.0440159	-0.132043	0.223553	0.159513	-0.364263	0.0450652
113.3	0.00104141	0.0452583	0.147852	0.0360165	-0.126231	0.226914	0.17056	-0.366743	0.0310082
113.4	-0.00206757	0.0619457	0.156487	0.0259953	-0.121903	0.232188	0.183508	-0.36911	0.0169809
113.5	-0.00414085	0.0800245	0.161965	0.0142326	-0.119327	0.239144	0.198269	-0.371047	0.0034492
113.6	-0.00498962	0.0995605	0.164243	0.00106621	-0.118714	0.247485	0.214658	-0.372301	-0.0091176
113.7	-0.00445271	0.120531	0.163399	-0.0131493	-0.12017	0.256878	0.232381	-0.372649	-0.0203059
113.8	-0.00244713	0.142837	0.159636	-0.027998	-0.123729	0.266924	0.251048	-0.371803	-0.0297458
113.9	0.00109863	0.166301	0.153267	-0.0430298	-0.12935	0.277203	0.270199	-0.369611	-0.0371382
114	0.00624943	0.190635	0.144676	-0.0577793	-0.136881	0.287342	0.289354	-0.365951	-0.0422547
114.1	0.0130157	0.215475	0.134319	-0.0717678	-0.146048	0.296973	0.30802	-0.360765	-0.0449929
114.2	0.0213499	0.240424	0.122698	-0.0845013	-0.156496	0.305764	0.325669	-0.354011	-0.0453198
114.3	0.0311575	0.265037	0.11032	-0.0955334	-0.167767	0.313427	0.341807	-0.345627	-0.0433266
114.4	0.042305	0.288809	0.0976767	-0.104433	-0.179362	0.319764	0.355974	-0.335698	-0.0391829
114.5	0.0546322	0.31121	0.0852595	-0.110817	-0.190741	0.324644	0.367752	-0.324289	-0.0331454
114.6	0.0679245	0.331714	0.0734777	-0.114347	-0.20134	0.328005	0.376807	-0.311582	-0.0255468
114.7	0.0819387	0.349842	0.0626657	-0.114735	-0.210589	0.329848	0.382924	-0.297752	-0.0167382
114.8	0.0963955	0.365195	0.0530711	-0.111759	-0.217987	0.330269	0.385976	-0.282921	-0.00709057
114.9	0.110975	0.377458	0.0448192	-0.105297	-0.223059	0.329386	0.385941	-0.267348	0.00300074
115	0.125344	0.386403	0.0379548	-0.0952511	-0.225416	0.327338	0.382899	-0.251163	0.0131886
115.1	0.139142	0.391882	0.0324551	-0.0816517	-0.224785	0.324242	0.377065	-0.234557	0.0231569
115.2	0.152021	0.393912	0.0281698	-0.0645885	-0.221015	0.320275	0.368735	-0.217704	0.0326385
115.3	0.163658	0.392603	0.0248572	-0.044281	-0.214081	0.315617	0.358267	-0.200744	0.0413871
115.4	0.173708	0.388214	0.0222232	-0.0210304	-0.204056	0.310364	0.34608	-0.183855	0.0492718
115.5	0.181886	0.381097	0.0199319	0.00479507	-0.191139	0.304627	0.332638	-0.1671	0.0561879
115.6	0.18794	0.371672	0.0176104	0.0327282	-0.175675	0.298432	0.318461	-0.150566	0.0620878
115.7	0.191732	0.36039	0.0149179	0.0622997	-0.158077	0.291768	0.304066	-0.134297	0.0669978
115.8	0.193142	0.347791	0.0115139	0.0928993	-0.138818	0.28459	0.289906	-0.118327	0.0709686
115.9	0.192134	0.334469	0.00708931	0.123926	-0.11841	0.27682	0.276402	-0.102713	0.0740967
116	0.188717	0.320997	0.00141524	0.154732	-0.0973634	0.268334	0.263923	-0.0874204	0.0764809
116.1	0.182965	0.307898	-0.00568016	0.184704	-0.0762314	0.259043	0.25278	-0.0724728	0.0782566
116.2	0.175047	0.295671	-0.0142901	0.213266	-0.0555047	0.248824	0.243229	-0.0579145	0.0795512
116.3	0.165191	0.284739	-0.0243772	0.23984	-0.0356387	0.237576	0.235473	-0.0437384	0.0805049
116.4	0.153683	0.275416	-0.0358274	0.26392	-0.0170268	0.225171	0.22963	-0.0299633	0.0812624
116.5	0.140825	0.267917	-0.0484393	0.285069	7.2329e-06	0.211563	0.225706	-0.0165817	0.0819366
116.6	0.126912	0.262378	-0.0619795	0.302956	0.0152298	0.196759	0.223624	-0.00363814	0.0826352
116.7	0.112226	0.258832	-0.0761385	0.31739	0.0284563	0.18083	0.223276	0.00884398	0.0834367
116.8	0.0969877	0.257253	-0.0905703	0.328266	0.0395628	0.163905	0.22451	0.0208781	0.0844355
116.9	0.0814342	0.257549	-0.104934	0.335594	0.0484649	0.146185	0.227114	0.0323648	0.0857561
117	0.0657539	0.259501	-0.118851	0.339483	0.0551101	0.12797	0.230785	0.0432819	0.0874763
117.1	0.0500784	0.262877	-0.131959	0.340118	0.0594703	0.109599	0.235182	0.053616	0.0896707
117.2	0.0344296	0.2674	-0.143899	0.33778	0.0615092	0.0914253	0.23997	0.0634067	0.0924251
117.3	0.0187922	0.272763	-0.154357	0.332853	0.0612293	0.0739044	0.244805	0.0727501	0.0958261
117.4	0.00310802	0.278673	-0.163095	0.325754	0.0586577	0.0575489	0.249264	0.0816728	0.0999758
117.5	-0.0127335	0.284824	-0.169918	0.316946	0.0538455	0.0428451	0.252905	0.0903154	0.104943
117.6	-0.0288849	0.290952	-0.174661	0.306896	0.0468384	0.0303005	0.255332	0.0987783	0.110816
117.7	-0.0455017	0.296867	-0.17723	0.296036	0.0377079	0.0203995	0.256183	0.107179	0.117695
117.8	-0.0627546	0.302405	-0.177596	0.284822	0.0265613	0.0135426	0.255078	0.115701	0.12562
117.9	-0.0807896	0.307441	-0.175768	0.273651	0.013537	0.0100788	0.251644	0.124487	0.134637
118	-0.0996809	0.311879	-0.171802	0.262846	-0.00115625	0.0102905	0.245562	0.133747	0.144774
118.1	-0.119459	0.315633	-0.165813	0.252657	-0.0172304	0.0143341	0.236605	0.143653	0.156015
118.2	-0.140071	0.318686	-0.157936	0.243271	-0.0343336	0.0222744	0.224642	0.15433	0.168306
118.3	-0.161347	0.321063	-0.148358	0.234797	-0.0520314	0.034058	0.209639	0.165912	0.181555
118.4	-0.183042	0.322818	-0.137286	0.227245	-0.0698117	0.0495228	0.19166	0.178426	0.195565
118.5	-0.204815	0.324037	-0.124955	0.220562	-0.0871209	0.0683865	0.170857	0.191938	0.210106
118.6	-0.226231	0.324805	-0.111574	0.214569	-0.103384	0.0902885	0.147515	0.206415	0.224884
118.7	-0.246819	0.325175	-0.0973936	0.209032	-0.118034	0.114769	0.12205	0.221704	0.239544
118.8	-0.266059	0.325218	-0.0826675	0.203691	-0.130545	0.14127	0.0949556	0.237703	0.253642
118.9	-0.283412	0.325024	-0.0676284	0.198307	-0.140418	0.169182	0.0668029	0.25416	0.26672
119	-0.298326	0.324684	-0.0524796	0.192574	-0.147204	0.197888	0.0382398	0.270836	0.278275
119.1	-0.310323	0.32427	-0.0374181	0.186197	-0.150546	0.226704	0.00995513	0.287349	0.287776
119.2	-0.319016	0.323766	-0.0226157	0.178839	-0.150247	0.25498	-0.0173538	0.303327	0.29473
119.3	-0.324116	0.323189	-0.00824798	0.170252	-0.146299	0.282074	-0.043011	0.318413	0.298643
119.4	-0.325414	0.322555	0.00554064	0.16021	-0.138863	0.307396	-0.0663995	0.332186	0.299058
119.5	-0.322814	0.321878	0.0186472	0.148548	-0.128222	0.330397	-0.0869862	0.344293	0.295636
119.6	-0.316361	0.321156	0.0309184	0.135189	-0.114822	0.350588	-0.104306	0.354386	0.288067
119.7	-0.306262	0.320388	0.0422498	0.120075	-0.0992855	0.367535	-0.117985	0.362123	0.276185
119.8	-0.292846	0.319558	0.0525709	0.103235	-0.0823502	0.380879	-0.127772	0.367287	0.25991
119.9	-0.276541	0.318607	0.0617647	0.0847931	-0.0647902	0.390349	-0.133567	0.369675	0.239328
120	-0.257903	0.317494	0.0697277	0.0649414	-0.0474476	0.395745	-0.135374	0.369217	0.214682
120.1	-0.237561	0.31619	0.076339	0.0439053	-0.0311808	0.396984	-0.133318	0.365923	0.186347
120.2	-0.216171	0.314685	0.0815172	0.0220146	-0.0168637	0.393988	-0.127619	0.359929	0.154824
120.3	-0.194401	0.312949	0.0852225	-0.000402451	-0.00526706	0.38678	-0.118563	0.351475	0.120702
120.4	-0.17292	0.310952	0.087393	-0.0230179	0.00293883	0.375492	-0.106517	0.340899	0.0847063
120.5	-0.152393	0.308672	0.0879673	-0.0455017	0.00721272	0.360327	-0.0919016	0.328621	0.0475903
120.6	-0.133429	0.306114	0.0868976	-0.0675106	0.00716217	0.341521	-0.0751133	0.315129	0.0101428
120.7	-0.1165	0.303275	0.0841578	-0.0887051	0.0025998	0.319397	-0.0565048	0.300953	-0.0268135
120.8	-0.101967	0.300151	0.0797465	-0.108772	-0.00650684	0.294375	-0.0364536	0.286649	-0.0625246
120.9	-0.0900946	0.296771	0.0736994	-0.127447	-0.0200257	0.266896	-0.0153519	0.272756	-0.0962615
121	-0.0810642	0.293206	0.0661367	-0.144482	-0.0376519	0.237471	0.00645126	0.259825	-0.127409
121.1	-0.0749073	0.289535	0.0572203	-0.159716	-0.058874	0.206662	0.0286719	0.248333	-0.155438
121.2	-0.0715551	0.285811	0.0471278	-0.173052	-0.0830273	0.175068	0.0510558	0.238668	-0.179903
121.3	-0.0708275	0.282059	0.0360834	-0.184416	-0.109366	0.143313	0.0733703	0.231208	-0.200526
121.4	-0.0724735	0.278327	0.0243469	-0.193796	-0.137106	0.112008	0.0954126	0.226118	-0.217142
121.5	-0.0761681	0.274682	0.0122011	-0.201187	-0.165399	0.0817818	0.116984	0.223443	-0.22973
121.6	-0.0815859	0.271172	-7.4132e-05	-0.206644	-0.193361	0.0532936	0.137895	0.223118	-0.238351
121.7	-0.0883665	0.267824	-0.0122076	-0.210264	-0.220154	0.0271152	0.157965	0.224981	-0.243169
121.8	-0.0961466	0.264614	-0.0239055	-0.212185	-0.245011	0.00379028	0.177053	0.228766	-0.244469
121.9	-0.104588	0.261499	-0.0349096	-0.212551	-0.267236	-0.0161701	0.195036	0.234097	-0.242613
122	-0.113413	0.258429	-0.0449821	-0.211544	-0.28623	-0.0323254	0.211751	0.240579	-0.238054
122.1	-0.122381	0.255318	-0.0539519	-0.209354	-0.301542	-0.0442978	0.227046	0.247748	-0.231216
122.2	-0.131311	0.252019	-0.0617371	-0.206152	-0.312862	-0.0518108	0.240801	0.25509	-0.222548
122.3	-0.140094	0.248366	-0.0683001	-0.202152	-0.320043	-0.0546585	0.252902	0.262181	-0.212523
122.4	-0.148669	0.24419	-0.0737036	-0.197533	-0.323074	-0.0527302	0.26326	0.268629	-0.201563
122.5	-0.157064	0.239297	-0.0780531	-0.192507	-0.322086	-0.0460602	0.271828	0.274139	-0.190078
122.6	-0.16537	0.233458	-0.0814786	-0.187262	-0.317368	-0.0347591	0.278563	0.278486	-0.178425
122.7	-0.173737	0.226411	-0.0841755	-0.181997	-0.309321	-0.0189968	0.283423	0.281551	-0.166936
122.8	-0.182331	0.217901	-0.086361	-0.176884	-0.298441	0.000959773	0.286387	0.283367	-0.155895
122.9	-0.191307	0.207721	-0.0882847	-0.172056	-0.285301	0.0247196	0.287427	0.284007	-0.145532
123	-0.200885	0.195701	-0.0902088	-0.167681	-0.270519	0.0518536	0.286517	0.283726	-0.136038
123.1	-0.211248	0.181709	-0.0923684	-0.163895	-0.254719	0.0818256	0.283654	0.282785	-0.127588
123.2	-0.222565	0.16563	-0.0949737	-0.160872	-0.238556	0.114085	0.278812	0.281537	-0.120308
123.3	-0.234931	0.147417	-0.0981685	-0.158707	-0.222674	0.148074	0.271953	0.280419	-0.114292
123.4	-0.248376	0.127114	-0.102081	-0.157486	-0.207644	0.183201	0.263042	0.27978	-0.10961
123.5	-0.262887	0.104864	-0.106802	-0.157286	-0.193948	0.218892	0.252074	0.280008	-0.106287
123.6	-0.278411	0.0809124	-0.112338	-0.158192	-0.181989	0.25458	0.239024	0.281443	-0.104336
123.7	-0.294822	0.0555838	-0.118655	-0.160275	-0.172089	0.289704	0.223866	0.284348	-0.103746
123.8	-0.311918	0.0292471	-0.125676	-0.163548	-0.164438	0.323803	0.206609	0.288933	-0.104483
123.9	-0.329435	0.00231818	-0.133269	-0.167995	-0.159145	0.356438	0.187307	0.295242	-0.106489
124	-0.347028	-0.0247023	-0.141283	-0.173605	-0.156224	0.387288	0.166036	0.303238	-0.109658
124.1	-0.364323	-0.0513165	-0.149574	-0.180363	-0.155557	0.416069	0.142931	0.312791	-0.113909
124.2	-0.380924	-0.0770208	-0.157976	-0.188211	-0.156963	0.442616	0.118184	0.323679	-0.119089
124.3	-0.396417	-0.101315	-0.16632	-0.197073	-0.160191	0.466809	0.0920607	0.3356	-0.125037
124.4	-0.410391	-0.123718	-0.174445	-0.206852	-0.164932	0.488604	0.0648919	0.348054	-0.131576
124.5	-0.422441	-0.143794	-0.182162	-0.217443	-0.170846	0.508032	0.0371049	0.360555	-0.138477
124.6	-0.432168	-0.161217	-0.189292	-0.22871	-0.177571	0.525124	0.00917051	0.372579	-0.145505
124.7	-0.439206	-0.175722	-0.195665	-0.240526	-0.184743	0.540005	-0.0184286	0.383594	-0.152371
124.8	-0.443299	-0.187186	-0.201103	-0.252733	-0.192013	0.552803	-0.0452202	0.393078	-0.158821
124.9	-0.444309	-0.195532	-0.205468	-0.265165	-0.199048	0.563666	-0.0706863	0.400603	-0.164621
125	-0.44221	-0.200775	-0.208577	-0.277649	-0.205495	0.572699	-0.0943164	0.405764	-0.169507
125.1	-0.437034	-0.203011	-0.210254	-0.289999	-0.211078	0.580025	-0.115705	0.408242	-0.173301
125.2	-0.428895	-0.202414	-0.210342	-0.302078	-0.215583	0.585684	-0.134538	0.407757	-0.175784
125.3	-0.41803	-0.19918	-0.20866	-0.313717	-0.218866	0.589701	-0.150582	0.404151	-0.176804
125.4	-0.404741	-0.193545	-0.205029	-0.324806	-0.220851	0.592074	-0.163676	0.397393	-0.176272
125.5	-0.389424	-0.185768	-0.19926	-0.335197	-0.221494	0.592797	-0.173793	0.387603	-0.174121
125.6	-0.372534	-0.176144	-0.191192	-0.344751	-0.220802	0.591822	-0.181047	0.374979	-0.170422
125.7	-0.354561	-0.164957	-0.180683	-0.35339	-0.218825	0.589108	-0.185643	0.359773	-0.16526
125.8	-0.335971	-0.152447	-0.16763	-0.360996	-0.21567	0.584599	-0.187859	0.342358	-0.158825
125.9	-0.317231	-0.138818	-0.152007	-0.367529	-0.211483	0.578247	-0.188057	0.323084	-0.151302
126	-0.298798	-0.124238	-0.133843	-0.372932	-0.206463	0.570013	-0.18668	0.302379	-0.142942
126.1	-0.281045	-0.108866	-0.113255	-0.37715	-0.200827	0.559851	-0.184226	0.280713	-0.134071
126.2	-0.264283	-0.0928223	-0.0904144	-0.3801	-0.194811	0.54777	-0.181207	0.25853	-0.125016
126.3	-0.248752	-0.076255	-0.0655592	-0.38176	-0.188658	0.533825	-0.178114	0.236268	-0.116083
126.4	-0.23458	-0.0592959	-0.0390117	-0.382095	-0.182614	0.518111	-0.175401	0.214292	-0.107587
126.5	-0.221824	-0.0421145	-0.0111672	-0.381065	-0.17691	0.50071	-0.173445	0.192953	-0.0998001
126.6	-0.210442	-0.0248835	0.0175236	-0.378641	-0.171774	0.481743	-0.172547	0.172548	-0.0929625
126.7	-0.200318	-0.00778791	0.0465846	-0.374821	-0.167369	0.461436	-0.172937	0.153316	-0.0872514
126.8	-0.191277	0.00895003	0.0754823	-0.369602	-0.163831	0.439972	-0.174737	0.13544	-0.0827706
126.9	-0.183092	0.0250795	0.103627	-0.363047	-0.161255	0.417576	-0.177956	0.119022	-0.0795398
127	-0.175535	0.0402973	0.130452	-0.3552	-0.159722	0.394436	-0.182551	0.104141	-0.0775447
127.1	-0.16832	0.0542915	0.155399	-0.346092	-0.15923	0.370734	-0.188421	0.0908532	-0.0766549
127.2	-0.161182	0.0667456	0.177933	-0.335806	-0.15972	0.346661	-0.195368	0.0791396	-0.0766883
127.3	-0.153911	0.0773161	0.197585	-0.324455	-0.161066	0.322394	-0.203136	0.0690047	-0.0774083
127.4	-0.146365	0.0856588	0.213945	-0.312223	-0.163105	0.298092	-0.211448	0.060338	-0.0785067
127.5	-0.138442	0.0914677	0.226708	-0.299335	-0.165645	0.273875	-0.22	0.053092	-0.0796814
127.6	-0.13009	0.094507	0.235685	-0.286013	-0.168456	0.249792	-0.228509	0.0471477	-0.080616
127.7	-0.121341	0.0945928	0.240787	-0.272511	-0.171246	0.225916	-0.236736	0.0424063	-0.0810094
127.8	-0.112309	0.0916298	0.242014	-0.259106	-0.173714	0.202298	-0.24443	0.0387995	-0.0805776
127.9	-0.10312	0.0855911	0.239455	-0.246119	-0.175605	0.178929	-0.251347	0.0361997	-0.0791266
128	-0.0940037	0.076576	0.233319	-0.23385	-0.176667	0.155762	-0.257258	0.0345462	-0.076535
128.1	-0.0852261	0.0647591	0.223898	-0.222616	-0.176673	0.132758	-0.261954	0.0337222	-0.0727594
128.2	-0.077076	0.0504387	0.211561	-0.212721	-0.175387	0.109875	-0.265249	0.0336369	-0.0678537
128.3	-0.0698204	0.0340221	0.19679	-0.204422	-0.172621	0.0870308	-0.266958	0.0342016	-0.061904
128.4	-0.0637054	0.0159872	0.180104	-0.197903	-0.168291	0.0641293	-0.266874	0.0353294	-0.0551126
128.5	-0.0589457	-0.00314542	0.16206	-0.193306	-0.16239	0.0410732	-0.2648	0.0369752	-0.047735
128.6	-0.0557032	-0.0228741	0.143158	-0.190697	-0.154995	0.0177711	-0.260581	0.0390647	-0.0400751
128.7	-0.0541296	-0.0426724	0.123927	-0.190104	-0.14626	-0.00586281	-0.254074	0.0415305	-0.0325229
128.8	-0.0542994	-0.0619967	0.104907	-0.191488	-0.136363	-0.0298859	-0.245072	0.0443667	-0.0254593
128.9	-0.0561581	-0.080352	0.0865668	-0.194693	-0.125578	-0.0543877	-0.233319	0.0475742	-0.0192664
129	-0.0595779	-0.0973541	0.0692786	-0.199533	-0.114245	-0.079393	-0.218606	0.0511908	-0.0142813
129.1	-0.0643787	-0.112695	0.0533612	-0.205738	-0.102755	-0.104957	-0.200802	0.0552163	-0.0108457
129.2	-0.0703373	-0.126137	0.0391025	-0.21295	-0.0915398	-0.131054	-0.179794	0.0596773	-0.00921488
129.3	-0.0771618	-0.137525	0.0266961	-0.220833	-0.0810484	-0.157636	-0.155533	0.0646092	-0.00957274
129.4	-0.0845366	-0.146839	0.0162437	-0.229029	-0.0717119	-0.184648	-0.128059	0.0700918	-0.0120409
129.5	-0.0921288	-0.15417	0.00777733	-0.237177	-0.0639495	-0.211977	-0.0974841	0.076231	-0.0166316
129.6	-0.0996122	-0.159669	0.00129767	-0.244947	-0.0581803	-0.239465	-0.0639955	0.0830596	-0.0233362
129.7	-0.106686	-0.16352	-0.0032782	-0.252035	-0.0547723	-0.266924	-0.0278869	0.0905608	-0.0320454
129.8	-0.113077	-0.165954	-0.00607306	-0.258204	-0.0539736	-0.294159	0.0104226	0.0987489	-0.0425742
129.9	-0.118546	-0.167258	-0.00726994	-0.263285	-0.0559782	-0.320932	0.050423	0.107559	-0.0547237
130	-0.122956	-0.167702	-0.00706618	-0.26712	-0.0609359	-0.346969	0.091566	0.116907	-0.0682473
130.1	-0.126231	-0.167557	-0.00564602	-0.26968	-0.068901	-0.372041	0.133237	0.126668	-0.0829079
130.2	-0.128363	-0.166999	-0.00318817	-0.271002	-0.0798391	-0.395855	0.174788	0.136691	-0.0984454
130.3	-0.129421	-0.166161	0.000122534	-0.271189	-0.0936259	-0.418151	0.21558	0.146765	-0.114561
130.4	-0.129505	-0.165137	0.00408331	-0.270397	-0.110025	-0.438678	0.254998	0.156603	-0.131024
130.5	-0.128754	-0.16398	0.00851082	-0.268833	-0.128699	-0.457203	0.292495	0.16595	-0.14757
130.6	-0.127347	-0.162651	0.0132219	-0.266743	-0.149248	-0.473531	0.327645	0.17448	-0.16399
130.7	-0.125484	-0.161061	0.0180326	-0.264364	-0.171216	-0.487541	0.360126	0.181843	-0.180037
130.8	-0.123393	-0.1591	0.0227816	-0.261971	-0.194104	-0.499141	0.389693	0.187754	-0.195484
130.9	-0.121286	-0.156669	0.0273398	-0.259762	-0.217333	-0.508272	0.416241	0.19194	-0.210083
131	-0.11933	-0.153655	0.0316058	-0.257925	-0.240276	-0.514906	0.439795	0.194187	-0.223583
131.1	-0.11766	-0.149954	0.0354411	-0.256565	-0.262319	-0.51906	0.460484	0.194349	-0.235759
131.2	-0.116407	-0.145447	0.0387288	-0.255774	-0.282821	-0.520807	0.478572	0.192306	-0.246343
131.3	-0.115678	-0.140057	0.0413743	-0.255581	-0.301182	-0.52025	0.494402	0.188072	-0.255069
131.4	-0.1155	-0.133753	0.0432657	-0.255987	-0.316841	-0.517507	0.508348	0.181705	-0.261668
131.5	-0.11583	-0.126532	0.0443265	-0.256872	-0.329294	-0.512748	0.520758	0.173391	-0.265884
131.6	-0.116549	-0.118438	0.0444953	-0.258099	-0.338083	-0.506195	0.531974	0.163357	-0.267507
131.7	-0.11754	-0.109548	0.0437356	-0.259466	-0.342881	-0.498043	0.542347	0.151938	-0.266332
131.8	-0.11864	-0.0999605	0.042043	-0.260786	-0.34346	-0.48851	0.552161	0.139629	-0.262244
131.9	-0.119666	-0.089781	0.0393811	-0.261826	-0.339683	-0.477836	0.561574	0.12686	-0.255166
132	-0.120428	-0.0790856	0.0357732	-0.262316	-0.331529	-0.466253	0.570642	0.114147	-0.245182
132.1	-0.120728	-0.0679791	0.0312673	-0.262011	-0.319154	-0.453985	0.57935	0.101954	-0.232403
132.2	-0.120353	-0.0565474	0.0259476	-0.260675	-0.302804	-0.441278	0.587552	0.0907481	-0.217096
132.3	-0.119103	-0.0448591	0.0199124	-0.258097	-0.282871	-0.428327	0.594998	0.0809742	-0.199585
132.4	-0.116811	-0.0329668	0.0132596	-0.254057	-0.259838	-0.415382	0.601374	0.0730232	-0.180283
132.5	-0.113309	-0.0209219	0.00613844	-0.248409	-0.234309	-0.402628	0.606294	0.0672299	-0.159724
132.6	-0.108484	-0.00875875	-0.00130889	-0.240993	-0.206941	-0.390304	0.609347	0.0637635	-0.138468
132.7	-0.102247	0.00353316	-0.00889842	-0.231712	-0.178471	-0.378595	0.610128	0.0627012	-0.117162
132.8	-0.0945139	0.01595	-0.0164667	-0.220509	-0.149659	-0.367708	0.608248	0.0641146	-0.0964279
132.9	-0.0852442	0.0285108	-0.0238746	-0.207312	-0.121284	-0.357772	0.603336	0.067848	-0.076848
133	-0.074419	0.0412214	-0.0309738	-0.192146	-0.0941557	-0.34897	0.595108	0.0737388	-0.0589917
133.1	-0.0621166	0.0540436	-0.0376254	-0.175058	-0.0690154	-0.341432	0.583378	0.0814431	-0.0433123
133.2	-0.0484543	0.0669287	-0.0437131	-0.156078	-0.0465469	-0.335306	0.568054	0.0906635	-0.0302625
133.3	-0.0336027	0.0797775	-0.0491725	-0.135311	-0.0273441	-0.330696	0.54915	0.10108	-0.0201159
133.4	-0.017766	0.0925262	-0.0539647	-0.112843	-0.0119247	-0.327745	0.526787	0.112252	-0.0130599
133.5	-0.00114632	0.105091	-0.0580723	-0.0888138	-0.000712791	-0.326595	0.501218	0.123781	-0.00913548
133.6	0.0160055	0.117386	-0.0615101	-0.0633945	0.0059677	-0.327352	0.472781	0.135279	-0.00821757
133.7	0.0334377	0.129281	-0.0643241	-0.0368061	0.00790795	-0.330106	0.441884	0.146409	-0.0101433
133.8	0.0508862	0.140651	-0.0665869	-0.00927734	0.00500163	-0.334882	0.408981	0.156865	-0.0145829
133.9	0.0680971	0.151404	-0.0683907	0.0189495	-0.00274507	-0.341695	0.374586	0.166362	-0.0211875
134	0.0848351	0.161436	-0.0697999	0.0475826	-0.0152268	-0.350584	0.339252	0.174769	-0.0295556
134.1	0.100875	0.170687	-0.070888	0.0763798	-0.0322327	-0.361551	0.303575	0.181855	-0.0391607
134.2	0.116035	0.179121	-0.0717517	0.105034	-0.0534448	-0.374548	0.268158	0.187527	-0.0495255
134.3	0.130198	0.186744	-0.0724845	0.133291	-0.0784625	-0.389532	0.23356	0.191817	-0.0601509
134.4	0.143311	0.193588	-0.0731861	0.160854	-0.106779	-0.406417	0.200296	0.194675	-0.0705512
134.5	0.155354	0.199749	-0.0739411	0.187452	-0.13782	-0.425064	0.168813	0.196164	-0.0802994
134.6	0.166375	0.205296	-0.0748313	0.212835	-0.170945	-0.445285	0.139521	0.196276	-0.0889823
134.7	0.176451	0.210326	-0.0759219	0.236753	-0.205469	-0.466871	0.112806	0.195049	-0.0962501
134.8	0.185707	0.214953	-0.0772353	0.259001	-0.240656	-0.489608	0.088991	0.192521	-0.101799
134.9	0.194279	0.219292	-0.0788268	0.279394	-0.27576	-0.513197	0.0683043	0.188684	-0.10542
135	0.202304	0.22342	-0.0807541	0.297787	-0.309992	-0.537368	0.050949	0.183592	-0.106945
135.1	0.209888	0.227448	-0.0830517	0.31403	-0.342584	-0.561779	0.0370796	0.177242	-0.106302
135.2	0.217117	0.231425	-0.085701	0.328032	-0.37279	-0.586105	0.026773	0.169592	-0.103439
135.3	0.22405	0.235369	-0.0887001	0.339745	-0.399923	-0.610056	0.0200316	0.160665	-0.0983891
135.4	0.230705	0.239269	-0.0920497	0.349144	-0.423365	-0.633276	0.0168062	0.150426	-0.0912573
135.5	0.237035	0.243063	-0.0957583	0.356211	-0.44256	-0.655483	0.0169888	0.138884	-0.0821793
135.6	0.242981	0.246667	-0.0998278	0.360985	-0.457045	-0.676368	0.0204073	0.126019	-0.0713332
135.7	0.248445	0.249957	-0.104214	0.363472	-0.466512	-0.695688	0.0268769	0.111852	-0.0589883
135.8	0.253313	0.252763	-0.108838	0.363708	-0.470785	-0.713228	0.0361665	0.0964965	-0.0454204
135.9	0.2574	0.25489	-0.113592	0.361755	-0.469823	-0.72874	0.0479667	0.080054	-0.0309544
136	0.260557	0.256141	-0.118378	0.357721	-0.463718	-0.742033	0.0618997	0.0627217	-0.0159328
136.1	0.26264	0.2563	-0.123069	0.35174	-0.452695	-0.752933	0.0775506	0.0446791	-0.000748396
136.2	0.263552	0.255165	-0.127525	0.343931	-0.437103	-0.761335	0.0945222	0.0261241	0.0142014
136.3	0.263237	0.252567	-0.131591	0.334448	-0.417426	-0.767166	0.11239	0.00735851	0.0284905
136.4	0.261723	0.248375	-0.135168	0.323437	-0.394246	-0.770315	0.130739	-0.0113686	0.0417109
136.5	0.259065	0.242537	-0.13811	0.311064	-0.368189	-0.770715	0.149161	-0.029655	0.0534539
136.6	0.255385	0.235086	-0.140273	0.297457	-0.339926	-0.768285	0.167274	-0.0471709	0.0633514
136.7	0.250879	0.226109	-0.141539	0.282797	-0.310166	-0.762962	0.184706	-0.063544	0.0710742
136.8	0.245782	0.215745	-0.141827	0.267286	-0.279627	-0.754686	0.201089	-0.0784008	0.0763078
136.9	0.240376	0.204218	-0.141069	0.251101	-0.248992	-0.743393	0.216098	-0.0915174	0.0788593
137	0.234951	0.191812	-0.139174	0.234432	-0.218908	-0.729032	0.229481	-0.102616	0.0785584
137.1	0.229799	0.17888	-0.136093	0.217421	-0.18997	-0.711561	0.241063	-0.111474	0.0753601
137.2	0.225194	0.165826	-0.13182	0.200235	-0.16266	-0.690948	0.250707	-0.117934	0.0692863
137.3	0.221367	0.153075	-0.126351	0.183037	-0.137388	-0.667192	0.258332	-0.121861	0.0604777
137.4	0.218509	0.141063	-0.119684	0.165964	-0.114502	-0.6403	0.263888	-0.123281	0.0491853
137.5	0.216752	0.130221	-0.1118	0.149149	-0.0942649	-0.610336	0.267361	-0.122193	0.0357053
137.6	0.216158	0.120905	-0.102747	0.132725	-0.076858	-0.577406	0.268787	-0.118715	0.0204957
137.7	0.216684	0.113398	-0.0925633	0.116829	-0.0623993	-0.541666	0.268243	-0.112987	0.0040791
137.8	0.218233	0.107929	-0.081301	0.101622	-0.0509414	-0.503301	0.265834	-0.105222	-0.0130098
137.9	0.220632	0.104659	-0.06901	0.0872097	-0.042468	-0.46256	0.261716	-0.095762	-0.0301311
138	0.223638	0.103624	-0.0557566	0.0737419	-0.0368895	-0.419744	0.25606	-0.084888	-0.046665
138.1	0.226955	0.104731	-0.0416135	0.0613346	-0.0340771	-0.3752	0.249056	-0.0729683	-0.0620167
138.2	0.230244	0.107768	-0.0266804	0.0500851	-0.0338644	-0.329252	0.240901	-0.0603799	-0.0756061
138.3	0.233124	0.112452	-0.0110454	0.0401382	-0.0360474	-0.282268	0.231828	-0.0474503	-0.086952
138.4	0.235182	0.118432	0.00517884	0.0316048	-0.0404338	-0.234577	0.222113	-0.0345588	-0.0955772
138.5	0.236057	0.125265	0.0218632	0.0245762	-0.0468125	-0.186504	0.212034	-0.0220149	-0.101173
138.6	0.235388	0.132458	0.0388894	0.0191364	-0.0549111	-0.138313	0.201843	-0.0101507	-0.103498
138.7	0.232883	0.13952	0.0561091	0.015337	-0.064424	-0.0902401	0.191807	0.000757983	-0.102513
138.8	0.228301	0.146021	0.073368	0.0131817	-0.0750274	-0.0424191	0.182222	0.0105342	-0.0982811
138.9	0.221459	0.151564	0.0904579	0.0126476	-0.0864267	0.00505294	0.173365	0.0190243	-0.0910022
139	0.212254	0.155801	0.107185	0.0136471	-0.0983237	0.0521988	0.165461	0.0261516	-0.0809903
139.1	0.200682	0.158425	0.123361	0.0160694	-0.110406	0.0990528	0.158718	0.0319013	-0.0686204
139.2	0.186862	0.159253	0.138776	0.0197697	-0.12238	0.145684	0.153317	0.0363557	-0.0543857
139.3	0.170975	0.1582	0.153203	0.0245323	-0.133965	0.192221	0.149405	0.0396768	-0.0388494
139.4	0.153291	0.155304	0.166414	0.0300903	-0.144929	0.238861	0.147063	0.042079	-0.0226271
139.5	0.134148	0.150729	0.17819	0.0361404	-0.15506	0.285828	0.146347	0.0438089	-0.00633192
139.6	0.113946	0.144689	0.188293	0.0423546	-0.164199	0.3333	0.147238	0.0451601	0.00945282
139.7	0.0931187	0.137534	0.196477	0.0483837	-0.172219	0.3814	0.149638	0.0463886	0.0241232
139.8	0.0721245	0.129664	0.202518	0.0538731	-0.179043	0.430148	0.153443	0.0478142	0.0372114
139.9	0.0514593	0.12156	0.20622	0.058445	-0.184676	0.47955	0.158525	0.0497406	0.0482891
140	0.0316343	0.113681	0.207411	0.0617695	-0.189171	0.529486	0.164676	0.0524755	0.0570486
140.1	0.013072	0.106517	0.205967	0.0635071	-0.192605	0.579752	0.171606	0.056227	0.0632319
140.2	-0.00385094	0.100519	0.201803	0.0633888	-0.195087	0.630061	0.179015	0.0611203	0.0667229
140.3	-0.0188293	0.096114	0.1949	0.0611572	-0.196787	0.680004	0.186589	0.067276	0.0674729
140.4	-0.0316343	0.0936706	0.185283	0.0566311	-0.197907	0.729128	0.194002	0.0746496	0.0655425
140.5	-0.0421124	0.0935142	0.173062	0.0496979	-0.198638	0.776884	0.200899	0.0831507	0.0611007
140.6	-0.0501995	0.0958574	0.158421	0.0403614	-0.199182	0.822747	0.206926	0.0925689	0.0543926
140.7	-0.0559254	0.100789	0.141628	0.0286655	-0.199707	0.866095	0.211751	0.102586	0.0457578
140.8	-0.0594196	0.1083	0.123042	0.0147457	-0.200384	0.906348	0.215073	0.11286	0.035568
140.9	-0.0608616	0.118267	0.103089	-0.00123978	-0.201371	0.942923	0.21663	0.122956	0.0241766
141	-0.060483	0.130451	0.0822827	-0.0190182	-0.202787	0.975336	0.216215	0.132448	0.0120223
141.1	-0.0585356	0.144504	0.0611799	-0.0382996	-0.20472	1.00313	0.213672	0.140904	-0.000519991
141.2	-0.0553408	0.160002	0.0403816	-0.0587692	-0.207253	1.02596	0.208882	0.147847	-0.0130281
141.3	-0.0512295	0.176431	0.0205005	-0.0800953	-0.210434	1.04358	0.20178	0.152881	-0.0251498
141.4	-0.0465355	0.193197	0.0021381	-0.101931	-0.214246	1.05583	0.192386	0.155609	-0.0365674
141.5	-0.0415812	0.209626	-0.0141315	-0.123949	-0.21866	1.06272	0.180817	0.155832	-0.0470185
141.6	-0.0366774	0.225028	-0.0277686	-0.145828	-0.223641	1.06433	0.167283	0.153365	-0.0562942
141.7	-0.0321016	0.23871	-0.0383034	-0.167273	-0.229111	1.06087	0.152042	0.148095	-0.0642388
141.8	-0.0281258	0.249954	-0.0453147	-0.188005	-0.234965	1.05263	0.135393	0.140138	-0.0707848
141.9	-0.0249748	0.258083	-0.0485275	-0.207806	-0.241095	1.04	0.117673	0.129649	-0.075907
142	-0.0228443	0.262477	-0.0478205	-0.226511	-0.247381	1.02347	0.0992433	0.116933	-0.0796044
142.1	-0.0218897	0.262599	-0.0431992	-0.243986	-0.253699	1.00354	0.0804695	0.102402	-0.0819833
142.2	-0.0222511	0.258002	-0.0347883	-0.260141	-0.259938	0.980753	0.0616994	0.0865372	-0.0830817
142.3	-0.024025	0.248354	-0.0228029	-0.274837	-0.265983	0.95566	0.0432697	0.0699347	-0.0830314
142.4	-0.0272245	0.233447	-0.00757255	-0.288008	-0.271712	0.928812	0.0254866	0.0532007	-0.0819185
142.5	-0.031847	0.21325	0.0104196	-0.299578	-0.276974	0.900725	0.00864801	0.0370021	-0.0798395
142.6	-0.0378656	0.187904	0.0305827	-0.309568	-0.281629	0.871851	-0.00702804	0.0219875	-0.0768697
142.7	-0.0451803	0.157706	0.0522867	-0.317892	-0.285544	0.842623	-0.0214072	0.00877063	-0.0730546
142.8	-0.0536671	0.123119	0.0748801	-0.324553	-0.288613	0.813353	-0.0343801	-0.00206512	-0.068455
142.9	-0.0631781	0.0847395	0.0976632	-0.329473	-0.290728	0.784378	-0.0458605	-0.010065	-0.0630503
143	-0.0735102	0.0433233	0.119957	-0.332617	-0.291778	0.755928	-0.0558325	-0.0148253	-0.0568275
143.1	-0.0844278	-0.000271999	0.141072	-0.333994	-0.291655	0.728222	-0.0643415	-0.0160584	-0.0497539
143.2	-0.0956926	-0.0450785	0.160407	-0.333645	-0.290284	0.701458	-0.0714486	-0.0135599	-0.0417793
143.3	-0.107028	-0.0900862	0.17741	-0.331614	-0.287626	0.675785	-0.0772242	-0.00724315	-0.032877
143.4	-0.118164	-0.134275	0.191644	-0.327948	-0.283692	0.651358	-0.0817316	0.00286403	-0.023031
143.5	-0.128852	-0.176641	0.20278	-0.32272	-0.278528	0.628277	-0.0850534	0.0165467	-0.0122504
143.6	-0.138875	-0.216222	0.210617	-0.316051	-0.272217	0.606617	-0.0872724	0.0335386	-0.000646353
143.7	-0.148027	-0.252153	0.215031	-0.308081	-0.264868	0.58648	-0.0885021	0.053429	0.0117078
143.8	-0.156107	-0.283675	0.216014	-0.29896	-0.256616	0.567938	-0.0888521	0.0757712	0.0246744
143.9	-0.162957	-0.310198	0.213661	-0.288914	-0.247628	0.551054	-0.0884162	0.0999902	0.0380828
144	-0.168467	-0.331316	0.208156	-0.278154	-0.238085	0.535891	-0.0872728	0.125498	0.0516572
144.1	-0.172552	-0.3468	0.199765	-0.26689	-0.228233	0.522492	-0.0855229	0.151687	0.065181
144.2	-0.175207	-0.356623	0.188803	-0.255308	-0.21834	0.510882	-0.0832837	0.177901	0.0783684
144.3	-0.176455	-0.36092	0.175642	-0.24362	-0.208653	0.50103	-0.0806725	0.20353	0.0909467
144.4	-0.176341	-0.359959	0.160738	-0.232014	-0.199365	0.492896	-0.0778247	0.227902	0.102644
144.5	-0.174902	-0.354185	0.14453	-0.220671	-0.190647	0.486342	-0.0748927	0.250416	0.113226
144.6	-0.172258	-0.344161	0.127465	-0.209709	-0.182637	0.481205	-0.0720564	0.270514	0.122488
144.7	-0.168518	-0.330507	0.109927	-0.199224	-0.175422	0.477248	-0.0694964	0.287694	0.130306
144.8	-0.163758	-0.31391	0.0922683	-0.189322	-0.16903	0.474268	-0.0673909	0.301597	0.136579
144.9	-0.158088	-0.295043	0.0747976	-0.180092	-0.163396	0.471997	-0.0659128	0.311912	0.141249
145	-0.151596	-0.274555	0.0578139	-0.171604	-0.158421	0.470236	-0.0652005	0.318515	0.144352
145.1	-0.144416	-0.253073	0.0415641	-0.163912	-0.153942	0.468747	-0.0653316	0.321298	0.145958
145.2	-0.136674	-0.231173	0.0262546	-0.157049	-0.149774	0.467339	-0.0663665	0.320239	0.146208
145.3	-0.128503	-0.209312	0.0120123	-0.151056	-0.145651	0.465823	-0.0683115	0.315466	0.145259
145.4	-0.120027	-0.187888	-0.00106768	-0.145967	-0.141272	0.464096	-0.0711027	0.307136	0.143295
145.5	-0.111395	-0.167222	-0.0128824	-0.141874	-0.136316	0.462109	-0.0746155	0.295584	0.140531
145.6	-0.102775	-0.14751	-0.0233249	-0.138882	-0.130467	0.459875	-0.0786517	0.281166	0.137135
145.7	-0.0943222	-0.12889	-0.0323103	-0.137074	-0.123426	0.457489	-0.0829753	0.264297	0.133268
145.8	-0.0862217	-0.111469	-0.0397864	-0.136587	-0.114962	0.455107	-0.0873213	0.245501	0.129106
145.9	-0.0787134	-0.0953066	-0.0456958	-0.137514	-0.104904	0.452895	-0.0913688	0.225277	0.124704
146	-0.0720301	-0.0804188	-0.0499688	-0.13994	-0.0931462	0.451067	-0.0947606	0.204177	0.12012
146.1	-0.0664196	-0.0668041	-0.0525644	-0.143927	-0.0796599	0.449824	-0.0971002	0.182703	0.115371
146.2	-0.062089	-0.0544474	-0.0534268	-0.149536	-0.0645122	0.449355	-0.0980004	0.16139	0.110427
146.3	-0.0592527	-0.0433695	-0.0524741	-0.156767	-0.0478691	0.44986	-0.0971315	0.140799	0.105218
146.4	-0.058074	-0.0336086	-0.049675	-0.165581	-0.0299596	0.451432	-0.0942271	0.121439	0.0995724
146.5	-0.0587111	-0.0251772	-0.0450302	-0.175901	-0.0110683	0.454098	-0.0891044	0.103802	0.0933681
146.6	-0.0612345	-0.0181067	-0.0385746	-0.187559	0.00844534	0.457808	-0.0816819	0.0883141	0.0864005
146.7	-0.0656033	-0.0124304	-0.0303825	-0.200338	0.0281444	0.462452	-0.0719204	0.0753281	0.0785422
146.8	-0.0717316	-0.00820848	-0.0206181	-0.213972	0.0475646	0.467802	-0.0598461	0.0651797	0.0696287
146.9	-0.0794258	-0.00547143	-0.00947274	-0.228125	0.0662728	0.473584	-0.0455654	0.0580906	0.0595238
147	-0.0883818	-0.00419637	0.00280937	-0.242403	0.0838309	0.479416	-0.0292679	0.0542472	0.0481472
147.1	-0.098237	-0.00435277	0.0159073	-0.256378	0.0998245	0.484961	-0.0112412	0.0537195	0.0354123
147.2	-0.108539	-0.00588246	0.0294349	-0.269642	0.11389	0.489813	0.00816773	0.0564431	0.0213079
147.3	-0.118731	-0.00869867	0.0429805	-0.281759	0.125735	0.493588	0.0285817	0.0622987	0.00587654
147.4	-0.128213	-0.0126211	0.0561207	-0.29229	0.135151	0.495913	0.0496275	0.0710026	-0.0107501
147.5	-0.136376	-0.0174238	0.0684018	-0.300854	0.14202	0.496413	0.0709186	0.0822269	-0.0284042
147.6	-0.142638	-0.0228321	0.0793587	-0.307085	0.146342	0.494877	0.0920968	0.0954782	-0.0468824
147.7	-0.146405	-0.0285561	0.0885752	-0.310738	0.148201	0.491135	0.11284	0.110187	-0.0659156
147.8	-0.147079	-0.0342867	0.0956944	-0.31163	0.14778	0.485176	0.132866	0.125709	-0.0852802
147.9	-0.144237	-0.0396597	0.100423	-0.309679	0.145372	0.47704	0.15195	0.141284	-0.104654
148	-0.137568	-0.0442974	0.102551	-0.304888	0.141333	0.466889	0.169927	0.156151	-0.123708
148.1	-0.126869	-0.047826	0.101943	-0.297358	0.136035	0.454987	0.18667	0.169537	-0.142124
148.2	-0.11209	-0.049886	0.0985852	-0.287235	0.129899	0.441691	0.202119	0.180683	-0.159606
148.3	-0.0933475	-0.0501883	0.0925528	-0.274755	0.123372	0.427418	0.216243	0.188947	-0.175884
148.4	-0.0709124	-0.0484926	0.0840236	-0.260252	0.116867	0.412592	0.229045	0.19371	-0.190694
148.5	-0.0452166	-0.0446236	0.0732657	-0.244104	0.110777	0.397673	0.240572	0.194519	-0.203861
148.6	-0.016818	-0.0384485	0.0606153	-0.22674	0.105456	0.383095	0.250859	0.190981	-0.215224
148.7	0.0136404	-0.0299523	0.0464504	-0.208586	0.10117	0.369282	0.259952	0.182879	-0.224674
148.8	0.0454063	-0.0192139	0.0312114	-0.190037	0.0980883	0.356619	0.267923	0.170191	-0.232166
148.9	0.0776949	-0.00643464	0.0153312	-0.171488	0.0962959	0.345387	0.274837	0.153046	-0.237709
149	0.109708	0.00811557	-0.000794437	-0.153311	0.09576	0.335759	0.280709	0.131742	-0.241408
149.1	0.140675	0.0240686	-0.0168091	-0.135847	0.0963908	0.327853	0.285533	0.106707	-0.243375
149.2	0.16992	0.0409258	-0.0323804	-0.11936	0.0980688	0.321688	0.289318	0.0784426	-0.243834
149.3	0.19681	0.0581291	-0.0472256	-0.104063	0.100535	0.317204	0.292069	0.0475535	-0.243016
149.4	0.220806	0.0750749	-0.0611293	-0.0900898	0.103465	0.314267	0.293766	0.0146477	-0.241184
149.5	0.241491	0.091151	-0.0739501	-0.0774879	0.10651	0.312687	0.294408	-0.0195875	-0.238669
149.6	0.258623	0.105745	-0.0856159	-0.0662899	0.109335	0.312249	0.293999	-0.0544603	-0.235813
149.7	0.272098	0.118274	-0.096123	-0.0564594	0.111574	0.312706	0.292557	-0.0893274	-0.232962
149.8	0.281936	0.128211	-0.105569	-0.0479202	0.112897	0.313845	0.290116	-0.123572	-0.230475
149.9	0.288239	0.135097	-0.114065	-0.0405846	0.112995	0.315472	0.28672	-0.156716	-0.228738
150	0.291218	0.13856	-0.121727	-0.0343094	0.111612	0.317446	0.282443	-0.188248	-0.228067
150.1	0.291169	0.138325	-0.128627	-0.0289574	0.108547	0.319666	0.277415	-0.217775	-0.228777
150.2	0.288442	0.134255	-0.134856	-0.0244045	0.103668	0.322112	0.271783	-0.24498	-0.231156
150.3	0.283407	0.12634	-0.140529	-0.0205116	0.0969272	0.324793	0.265685	-0.269629	-0.23539
150.4	0.276427	0.114712	-0.145737	-0.0171623	0.0883227	0.327807	0.259257	-0.291529	-0.241654
150.5	0.267844	0.099612	-0.150484	-0.0142441	0.07792	0.33125	0.252637	-0.310502	-0.250034
150.6	0.257987	0.081414	-0.15474	-0.0116615	0.0658513	0.335286	0.245961	-0.326475	-0.260549
150.7	0.247146	0.0605562	-0.158493	-0.0093956	0.0523153	0.340075	0.239363	-0.339361	-0.273148
150.8	0.235576	0.0375765	-0.161706	-0.00743294	0.0375214	0.345747	0.232949	-0.349054	-0.287699
150.9	0.223504	0.0130413	-0.164274	-0.00580788	0.0217038	0.352404	0.226815	-0.355519	-0.304017
151	0.211142	-0.0124361	-0.166084	-0.00451851	0.00508984	0.36006	0.221007	-0.358683	-0.321845
151.1	0.198655	-0.0382216	-0.167054	-0.00355911	-0.0120944	0.368693	0.215532	-0.358577	-0.340861
151.2	0.186175	-0.0637314	-0.167158	-0.00292206	-0.0295905	0.378197	0.210379	-0.355244	-0.36073
151.3	0.173808	-0.0884001	-0.166339	-0.00255013	-0.0471014	0.388363	0.205518	-0.348705	-0.381024
151.4	0.161664	-0.111695	-0.164593	-0.00236893	-0.064381	0.398961	0.200896	-0.339088	-0.40136
151.5	0.149868	-0.133167	-0.161954	-0.00230026	-0.0812477	0.409649	0.196451	-0.326453	-0.421292
151.6	0.138567	-0.152387	-0.158482	-0.00221252	-0.0975312	0.420056	0.19213	-0.311022	-0.440386
151.7	0.127881	-0.169015	-0.154247	-0.00192642	-0.113068	0.429743	0.187928	-0.293071	-0.458282
151.8	0.117925	-0.182801	-0.149335	-0.00120163	-0.127739	0.43821	0.183887	-0.272915	-0.474669
151.9	0.10877	-0.193572	-0.143864	0.000230789	-0.141465	0.444989	0.180087	-0.250921	-0.489295
152	0.100493	-0.201236	-0.137896	0.00266457	-0.154165	0.449593	0.176608	-0.227475	-0.501919
152.1	0.0931101	-0.205756	-0.131486	0.00639534	-0.165776	0.451567	0.173536	-0.203033	-0.512437
152.2	0.0865927	-0.207157	-0.124656	0.0117435	-0.176235	0.450503	0.170998	-0.178067	-0.520756
152.3	0.0808611	-0.205542	-0.117444	0.0190182	-0.185484	0.446032	0.169202	-0.153079	-0.526903
152.4	0.0757666	-0.201093	-0.109833	0.0285149	-0.193475	0.437857	0.168378	-0.128599	-0.530967
152.5	0.0711365	-0.193992	-0.101737	0.0404587	-0.200201	0.425803	0.168751	-0.105127	-0.533037
152.6	0.0667486	-0.184497	-0.0930592	0.0550308	-0.205639	0.409766	0.170531	-0.0831662	-0.5333
152.7	0.0623121	-0.172927	-0.0836763	0.0723343	-0.209736	0.389742	0.1739	-0.0632013	-0.531966
152.8	0.0575399	-0.159615	-0.0734432	0.0924034	-0.212423	0.365801	0.178993	-0.0456431	-0.529183
152.9	0.0521727	-0.144911	-0.0622156	0.115208	-0.213618	0.338108	0.185897	-0.0308536	-0.525151
153	0.0459709	-0.129114	-0.0498524	0.140665	-0.213202	0.306904	0.194614	-0.0191418	-0.520032
153.1	0.0387526	-0.112516	-0.0362631	0.168594	-0.211019	0.272532	0.205052	-0.010751	-0.51395
153.2	0.0304193	-0.0954334	-0.0213823	0.198719	-0.206922	0.235402	0.217082	-0.00582156	-0.506946
153.3	0.0209551	-0.0781853	-0.0051937	0.230747	-0.200806	0.19602	0.230509	-0.00444385	-0.498972
153.4	0.0104322	-0.0610401	0.0122156	0.264368	-0.192539	0.154921	0.24507	-0.00664914	-0.489964
153.5	-0.000964165	-0.0442402	0.0307056	0.299215	-0.181971	0.112736	0.260452	-0.0123631	-0.479776
153.6	-0.0129595	-0.0279648	0.05007	0.334896	-0.168963	0.0701202	0.276315	-0.0214781	-0.468217
153.7	-0.0252085	-0.012356	0.0700706	0.370979	-0.153429	0.027737	0.2923	-0.0337759	-0.455052
153.8	-0.0372906	0.00246314	0.0904382	0.40707	-0.135333	-0.0137688	0.308053	-0.0489521	-0.440056
153.9	-0.0486841	0.0164001	0.110845	0.44278	-0.114666	-0.0537334	0.32319	-0.066658	-0.422978
154	-0.0588865	0.0293968	0.130961	0.477701	-0.0914978	-0.0914989	0.337375	-0.0865062	-0.403626
154.1	-0.0673962	0.041435	0.150425	0.511469	-0.0659703	-0.126474	0.350323	-0.108062	-0.381839
154.2	-0.0737963	0.0525244	0.16889	0.543715	-0.0382866	-0.158104	0.361791	-0.130887	-0.357566
154.3	-0.0777273	0.0626629	0.186001	0.57407	-0.00874797	-0.185897	0.371609	-0.154475	-0.33082
154.4	-0.0789108	0.0718191	0.201457	0.602194	0.022245	-0.209461	0.379667	-0.178374	-0.301685
154.5	-0.077177	0.0799683	0.21503	0.627781	0.0542198	-0.228475	0.385931	-0.202057	-0.270419
154.6	-0.0724897	0.0870769	0.226527	0.650532	0.0866404	-0.242738	0.39046	-0.225079	-0.23735
154.7	-0.0649633	0.0931051	0.235842	0.670151	0.118975	-0.252206	0.393322	-0.246988	-0.202958
154.8	-0.0548391	0.0980242	0.242943	0.686371	0.150646	-0.256956	0.394597	-0.267396	-0.167791
154.9	-0.0424519	0.101791	0.247841	0.699018	0.181058	-0.257171	0.394422	-0.286019	-0.132466
155	-0.0282202	0.104349	0.250605	0.707893	0.209632	-0.253164	0.392982	-0.302555	-0.097677
155.1	-0.0126266	0.105621	0.251416	0.712883	0.235801	-0.245365	0.390489	-0.316854	-0.0640929
155.2	0.00382805	0.105556	0.250517	0.713909	0.259116	-0.234268	0.387146	-0.328805	-0.0324466
155.3	0.0206022	0.104133	0.248163	0.710999	0.279204	-0.220457	0.383154	-0.338344	-0.00341988
155.4	0.0371923	0.101368	0.244643	0.704224	0.295789	-0.20454	0.378711	-0.345552	0.0223475
155.5	0.0531435	0.0972956	0.24033	0.69371	0.308689	-0.187168	0.373981	-0.350486	0.0442779
155.6	0.0680771	0.0920236	0.235633	0.679752	0.317854	-0.169033	0.369112	-0.353367	0.0619364
155.7	0.0816622	0.0856979	0.230949	0.662678	0.32334	-0.150797	0.364237	-0.35439	0.0749538
155.8	0.0936937	0.0784719	0.22667	0.642935	0.325306	-0.133026	0.359467	-0.353802	0.0831463
155.9	0.104089	0.0705431	0.223146	0.620987	0.323991	-0.11622	0.354875	-0.351887	0.0863979
156	0.112849	0.0621422	0.220688	0.597395	0.319743	-0.100771	0.350533	-0.3489	0.0847239
156.1	0.120069	0.0535391	0.219552	0.572702	0.313002	-0.0869213	0.346549	-0.34516	0.07829
156.2	0.125915	0.0450304	0.219917	0.547495	0.30425	-0.0748631	0.342974	-0.340918	0.0673332
156.3	0.13062	0.0369127	0.221878	0.522356	0.293997	-0.0646072	0.339807	-0.336383	0.0522521
156.4	0.134423	0.0294464	0.225433	0.497839	0.282708	-0.056028	0.337018	-0.331734	0.0334635
156.5	0.137568	0.0228422	0.230503	0.474449	0.27082	-0.0489002	0.334601	-0.32705	0.0114987
156.6	0.140309	0.0172766	0.236924	0.452578	0.258721	-0.0429283	0.332578	-0.322401	-0.0131023
156.7	0.142879	0.0128801	0.244456	0.432552	0.24677	-0.0377365	0.330929	-0.317849	-0.0397518
156.8	0.145506	0.00972918	0.252773	0.414557	0.235249	-0.0328728	0.329564	-0.313404	-0.0677919
156.9	0.148286	0.00781325	0.261483	0.398745	0.224355	-0.0279099	0.328381	-0.309052	-0.0965972
157	0.151282	0.00702647	0.270223	0.385103	0.214213	-0.022369	0.327301	-0.304693	-0.125547
157.1	0.154491	0.00719622	0.2786	0.373573	0.204826	-0.0158154	0.326218	-0.30028	-0.154053
157.2	0.157834	0.00811175	0.286238	0.363918	0.1961	-0.00789033	0.32498	-0.295683	-0.181553
157.3	0.161185	0.00949935	0.292768	0.355902	0.187939	0.00168647	0.323407	-0.290698	-0.207562
157.4	0.164357	0.0110529	0.297838	0.349184	0.180174	0.0131096	0.321326	-0.285223	-0.2316
157.5	0.167146	0.01241	0.301197	0.343414	0.17257	0.0264076	0.31857	-0.279132	-0.253266
157.6	0.169263	0.0132368	0.302688	0.338224	0.164861	0.0415996	0.314974	-0.272314	-0.272226
157.7	0.170401	0.013211	0.302245	0.33326	0.156758	0.0585503	0.310383	-0.264628	-0.288191
157.8	0.170287	0.0120428	0.299858	0.328197	0.148007	0.0770515	0.304679	-0.255881	-0.300946
157.9	0.168664	0.00953749	0.295597	0.322792	0.138395	0.0968365	0.297781	-0.245925	-0.310319
158	0.165308	0.00555686	0.289586	0.316856	0.12772	0.117577	0.289633	-0.23461	-0.316272
158.1	0.160028	3.69915e-05	0.281967	0.310305	0.115844	0.138966	0.280222	-0.221795	-0.31877
158.2	0.152718	-0.00699826	0.272924	0.303144	0.102705	0.160683	0.269615	-0.207338	-0.317876
158.3	0.143307	-0.0154364	0.262666	0.295406	0.0882951	0.182467	0.257938	-0.191035	-0.31369
158.4	0.131822	-0.0250628	0.251387	0.28723	0.0726543	0.204119	0.24536	-0.172816	-0.306366
158.5	0.118346	-0.0356018	0.239267	0.278811	0.0558868	0.225487	0.232079	-0.152533	-0.296122
158.6	0.103035	-0.0466749	0.226443	0.27042	0.0381657	0.246531	0.218347	-0.130122	-0.2832
158.7	0.0860901	-0.0578081	0.213009	0.262377	0.0197368	0.267313	0.204416	-0.10561	-0.267876
158.8	0.0677786	-0.0684759	0.199028	0.254984	0.000878414	0.287974	0.190514	-0.0789913	-0.250436
158.9	0.0484343	-0.0781319	0.184483	0.248556	-0.0180964	0.308737	0.176852	-0.0503943	-0.231193
159	0.0284243	-0.08622	0.169362	0.243319	-0.0368766	0.329901	0.163633	-0.0199111	-0.210461
159.1	0.00813675	-0.0922253	0.15365	0.239471	-0.055149	0.351786	0.151016	0.0122804	-0.188558
159.2	-0.0120268	-0.0956461	0.137309	0.237123	-0.0726418	0.374791	0.139117	0.0459552	-0.165789
159.3	-0.0317163	-0.0960295	0.120323	0.236307	-0.089106	0.399289	0.128006	0.0808477	-0.142494
159.4	-0.0506039	-0.0929834	0.10272	0.236977	-0.104306	0.425665	0.117711	0.1166	-0.118972
159.5	-0.0683994	-0.0861799	0.0845514	0.239031	-0.118029	0.454247	0.108224	0.152941	-0.0955658
159.6	-0.0848618	-0.0753891	0.0659326	0.242245	-0.130142	0.48526	0.0995068	0.189531	-0.0725648
159.7	-0.099802	-0.0605061	0.0470096	0.246347	-0.140574	0.51891	0.0914763	0.226055	-0.0502906
159.8	-0.113092	-0.0415623	0.0279884	0.250961	-0.149282	0.555241	0.0840427	0.262224	-0.029037
159.9	-0.124641	-0.0186674	0.00911263	0.255651	-0.156256	0.594216	0.0771433	0.297694	-0.00907373
160	-0.134434	0.00794963	-0.00934934	0.259981	-0.161596	0.635647	0.0707721	0.332258	0.00929856
160.1	-0.142459	0.0379293	-0.0271069	0.263536	-0.165462	0.679201	0.0649578	0.365577	0.025836
160.2	-0.148762	0.0707958	-0.043883	0.265907	-0.168043	0.724436	0.0597237	0.397444	0.040288
160.3	-0.153424	0.105934	-0.0593966	0.266737	-0.169549	0.770804	0.0550902	0.427666	0.0524786
160.4	-0.156541	0.142685	-0.0734584	0.265745	-0.170176	0.817644	0.0511027	0.455981	0.0622578
160.5	-0.158205	0.180343	-0.0859256	0.262701	-0.170123	0.864275	0.0478544	0.482181	0.0694685
160.6	-0.158475	0.218172	-0.0967328	0.257521	-0.169619	0.909911	0.0454682	0.506001	0.0741248
160.7	-0.157404	0.255408	-0.105867	0.250174	-0.168941	0.953732	0.044008	0.527162	0.0762239
160.8	-0.155066	0.291268	-0.113417	0.240757	-0.168337	0.994889	0.0435022	0.545411	0.0758793
160.9	-0.151482	0.325003	-0.11954	0.229408	-0.168018	1.03251	0.0439786	0.560405	0.0732589
161	-0.146685	0.355936	-0.12448	0.216339	-0.168172	1.06586	0.0454363	0.571839	0.0685902
161.1	-0.1407	0.383478	-0.128502	0.201815	-0.168939	1.09419	0.0477796	0.579368	0.0621803
161.2	-0.133602	0.407158	-0.131924	0.186159	-0.170413	1.11693	0.0508638	0.582675	0.0543504
161.3	-0.125443	0.426657	-0.135006	0.169695	-0.17264	1.13356	0.054487	0.581523	0.0454617
161.4	-0.116308	0.441791	-0.138011	0.152721	-0.175626	1.14375	0.0583673	0.575674	0.0359213
161.5	-0.10634	0.452528	-0.141122	0.135536	-0.179363	1.14729	0.0621778	0.564985	0.0261104
161.6	-0.0956678	0.45893	-0.144484	0.118357	-0.1838	1.14416	0.0655865	0.549383	0.0163903
161.7	-0.0845022	0.461224	-0.148163	0.10136	-0.18882	1.1345	0.0682655	0.528837	0.00708866
161.8	-0.0731258	0.459794	-0.152144	0.0846157	-0.194241	1.11866	0.0698847	0.503487	-0.00150704
161.9	-0.0618591	0.455095	-0.156336	0.0681477	-0.199894	1.09714	0.0701714	0.473547	-0.00917912
162	-0.0510597	0.447657	-0.160563	0.0518951	-0.205618	1.07049	0.0688619	0.439414	-0.0157919
162.1	-0.0411158	0.43801	-0.164521	0.0357208	-0.211258	1.03945	0.0657583	0.401504	-0.021282
162.2	-0.0324516	0.426693	-0.167909	0.0194893	-0.216669	1.00487	0.0607447	0.360328	-0.0256631
162.3	-0.0254726	0.414255	-0.170379	0.00301361	-0.221727	0.967587	0.053779	0.316544	-0.0289991
162.4	-0.020586	0.401195	-0.171604	-0.0138683	-0.226342	0.928536	0.0448985	0.270815	-0.0313721
162.5	-0.0181313	0.387934	-0.171252	-0.0313244	-0.23044	0.888613	0.0341928	0.223909	-0.0329316
162.6	-0.0184574	0.374788	-0.169021	-0.0494709	-0.234003	0.848692	0.0217786	0.176541	-0.0338261
162.7	-0.0218077	0.36198	-0.164701	-0.0683575	-0.237085	0.809592	0.00782185	0.129431	-0.0342221
162.8	-0.0283813	0.349628	-0.158158	-0.0880108	-0.239788	0.772049	-0.00744944	0.0833478	-0.0342977
162.9	-0.03829	0.337756	-0.149333	-0.1084	-0.242262	0.736693	-0.0237747	0.0389035	-0.0341942
163	-0.0515242	0.326285	-0.138278	-0.1294	-0.244664	0.704052	-0.0409194	-0.00328783	-0.0340142
163.1	-0.0679407	0.315077	-0.125138	-0.150793	-0.247148	0.674551	-0.0586701	-0.0427231	-0.0338309
163.2	-0.0872946	0.303936	-0.110148	-0.172295	-0.249945	0.648453	-0.0768338	-0.0790158	-0.033668
163.3	-0.109226	0.292603	-0.0935902	-0.193609	-0.253289	0.625901	-0.0952505	-0.111825	-0.0335174
163.4	-0.133286	0.280809	-0.0758371	-0.21439	-0.257362	0.606963	-0.113798	-0.140967	-0.0333395
163.5	-0.15888	0.268316	-0.0573187	-0.234287	-0.262319	0.591593	-0.132367	-0.166335	-0.0330486
163.6	-0.185352	0.254921	-0.0385118	-0.252983	-0.268268	0.579705	-0.150863	-0.187913	-0.0325515
163.7	-0.212017	0.240498	-0.0199126	-0.270205	-0.275248	0.571104	-0.169223	-0.205844	-0.0317657
163.8	-0.238194	0.224968	-0.00198358	-0.285683	-0.283245	0.565474	-0.187416	-0.220309	-0.0306294
163.9	-0.263194	0.208309	0.0148723	-0.29924	-0.292181	0.562464	-0.205385	-0.231662	-0.0290637
164	-0.286368	0.190555	0.0302702	-0.310745	-0.301915	0.561652	-0.223053	-0.240206	-0.0269947
164.1	-0.307121	0.171821	0.0438603	-0.32016	-0.312247	0.562573	-0.240343	-0.246351	-0.0243719
164.2	-0.324959	0.152226	0.0553503	-0.327538	-0.322911	0.564768	-0.257132	-0.250546	-0.0211854
164.3	-0.339498	0.13194	0.0645062	-0.332993	-0.333565	0.567738	-0.273274	-0.253249	-0.0174963
164.4	-0.35046	0.111196	0.0711666	-0.336706	-0.343822	0.570977	-0.288596	-0.254945	-0.0133464
164.5	-0.357696	0.0902317	0.0752651	-0.338903	-0.353292	0.573996	-0.302939	-0.256046	-0.00880933
164.6	-0.361217	0.0692327	0.0768044	-0.339846	-0.361568	0.576336	-0.316155	-0.256979	-0.00398111
164.7	-0.361168	0.0484455	0.0758352	-0.339844	-0.368247	0.57754	-0.328049	-0.258069	0.00102663
164.8	-0.357812	0.0280874	0.0724797	-0.339231	-0.372966	0.57717	-0.338383	-0.259539	0.00605154
164.9	-0.351472	0.00838164	0.0669347	-0.338345	-0.375371	0.574889	-0.346972	-0.261613	0.0109854
165	-0.342566	-0.0104839	0.0594497	-0.337486	-0.375166	0.570399	-0.353708	-0.264359	0.015692
165.1	-0.331563	-0.0283539	0.0503044	-0.336941	-0.372128	0.563494	-0.358483	-0.267758	0.0200393
165.2	-0.319	-0.0450718	0.0398075	-0.336975	-0.366122	0.554102	-0.361215	-0.271759	0.0239112
165.3	-0.305408	-0.0605356	0.0283172	-0.33778	-0.357134	0.542225	-0.361919	-0.276174	0.0271976
165.4	-0.291292	-0.0746557	0.0162464	-0.339516	-0.345219	0.527998	-0.360701	-0.28078	0.0297687
165.5	-0.277097	-0.0873005	0.00397534	-0.342276	-0.330477	0.511687	-0.357726	-0.285216	0.0315347
165.6	-0.263198	-0.098366	-0.00814717	-0.346048	-0.313127	0.493624	-0.353149	-0.289146	0.0324113
165.7	-0.249902	-0.107781	-0.0197782	-0.350788	-0.293501	0.47427	-0.347168	-0.292209	0.0323451
165.8	-0.237462	-0.115496	-0.0305663	-0.356352	-0.272017	0.454113	-0.340048	-0.294039	0.0313382
165.9	-0.226073	-0.121495	-0.0402099	-0.36253	-0.249135	0.433756	-0.332093	-0.294281	0.0293739
166	-0.215855	-0.125801	-0.0484305	-0.369066	-0.225311	0.413832	-0.323603	-0.292565	0.0264671
166.1	-0.206859	-0.128481	-0.0549864	-0.375658	-0.201066	0.394972	-0.314888	-0.288613	0.0226812
166.2	-0.199107	-0.129634	-0.059681	-0.381935	-0.176936	0.377783	-0.30624	-0.282214	0.0180831
166.3	-0.19256	-0.129408	-0.0623838	-0.387535	-0.153447	0.362814	-0.297874	-0.273192	0.0127628
166.4	-0.187107	-0.128009	-0.0629633	-0.392086	-0.131078	0.350603	-0.289929	-0.261515	0.00688744
166.5	-0.182587	-0.1257	-0.061353	-0.395191	-0.110288	0.341624	-0.282531	-0.247216	0.000603914
166.6	-0.178834	-0.122808	-0.0575397	-0.396542	-0.0914692	0.336266	-0.275765	-0.230404	-0.00591207
166.7	-0.17566	-0.119738	-0.051537	-0.395815	-0.0749425	0.334826	-0.269618	-0.211279	-0.0124774
166.8	-0.172899	-0.116862	-0.0434155	-0.392776	-0.0609411	0.337523	-0.26398	-0.190084	-0.0189054
166.9	-0.170406	-0.114551	-0.0332846	-0.387276	-0.049642	0.34446	-0.258672	-0.167209	-0.0249977
167	-0.168031	-0.113179	-0.0212882	-0.379253	-0.0411348	0.355603	-0.253463	-0.143036	-0.0305796
167.1	-0.165618	-0.113079	-0.00758817	-0.368765	-0.0354084	0.370852	-0.248088	-0.118002	-0.0354881
167.2	-0.163003	-0.114528	0.00761854	-0.35597	-0.0323791	0.390002	-0.242271	-0.0926387	-0.0395999
167.3	-0.160047	-0.117752	0.0240635	-0.341091	-0.0318898	0.412756	-0.235722	-0.0674011	-0.0427694
167.4	-0.156643	-0.122911	0.0414482	-0.324474	-0.0337285	0.438757	-0.228155	-0.0428075	-0.0449018
167.5	-0.152731	-0.13006	0.0594625	-0.306507	-0.0376362	0.4676	-0.219309	-0.0192678	-0.045943
167.6	-0.148212	-0.139145	0.0777696	-0.287634	-0.0432867	0.49882	-0.208976	0.00277344	-0.0458658
167.7	-0.143054	-0.149996	0.0960475	-0.268341	-0.0503182	0.531895	-0.197012	0.0229242	-0.0446417
167.8	-0.137255	-0.162298	0.113945	-0.249086	-0.0583781	0.566271	-0.183374	0.0409105	-0.0422616
167.9	-0.130831	-0.175651	0.131124	-0.230274	-0.0671248	0.601359	-0.168108	0.0564349	-0.0387609
168	-0.123828	-0.189593	0.147232	-0.212286	-0.0761804	0.63658	-0.15136	0.0693304	-0.034173
168.1	-0.116319	-0.20357	0.16196	-0.195446	-0.0851812	0.671391	-0.133345	0.0795542	-0.028533
168.2	-0.108401	-0.216984	0.175049	-0.179977	-0.0938305	0.705252	-0.114359	0.0870396	-0.0218852
168.3	-0.100146	-0.229244	0.186313	-0.16601	-0.10189	0.737645	-0.0947567	0.0918732	-0.0142617
168.4	-0.0916414	-0.239783	0.195586	-0.153587	-0.1092	0.768103	-0.0749329	0.0941179	-0.00571036
168.5	-0.0830231	-0.248052	0.20275	-0.142643	-0.115637	0.796149	-0.0553062	0.0939843	0.00375199
168.6	-0.0744791	-0.253556	0.207777	-0.133041	-0.121112	0.82145	-0.0363344	0.0916282	0.0140171
168.7	-0.0661612	-0.255877	0.2107	-0.124571	-0.125578	0.843684	-0.0184175	0.0872546	0.0250571
168.8	-0.0582113	-0.254696	0.21163	-0.116961	-0.129054	0.862627	-0.00188594	0.0810814	0.0367863
168.9	-0.0508041	-0.249859	0.210778	-0.109861	-0.131613	0.878081	0.0129335	0.073267	0.0491245
169	-0.0440817	-0.241322	0.20837	-0.102932	-0.133364	0.889912	0.0257925	0.0640235	0.0619781
169.1	-0.0381994	-0.229185	0.204679	-0.0958195	-0.134475	0.898049	0.0365908	0.0535462	0.0751624
169.2	-0.0333185	-0.213666	0.199999	-0.0881767	-0.135127	0.90243	0.0452943	0.0419603	0.0885074
169.3	-0.029583	-0.195109	0.194654	-0.0796814	-0.135479	0.903027	0.0519456	0.0294546	0.101801
169.4	-0.0271206	-0.173992	0.188957	-0.070055	-0.135715	0.899882	0.0566919	0.016085	0.114825
169.5	-0.0260324	-0.150862	0.183193	-0.059082	-0.136016	0.893076	0.0597625	0.00197011	0.127342
169.6	-0.0264168	-0.126317	0.177658	-0.0465832	-0.136542	0.882689	0.0614386	-0.0127974	0.139096
169.7	-0.0283356	-0.100997	0.172583	-0.0324345	-0.137445	0.868805	0.0620449	-0.0281393	0.14983
169.8	-0.0317993	-0.075576	0.168158	-0.0165787	-0.138851	0.851534	0.0619683	-0.0439103	0.159287
169.9	-0.036787	-0.0506479	0.164515	0.000988007	-0.140827	0.831013	0.0616046	-0.0599927	0.167243
170	-0.0432396	-0.0267727	0.161679	0.0201988	-0.143418	0.80741	0.0613419	-0.0761942	0.173501
170.1	-0.0510683	-0.00444051	0.159624	0.0409985	-0.146661	0.780903	0.0615347	-0.092286	0.177863
170.2	-0.0601006	0.01593	0.158255	0.0632629	-0.150584	0.751685	0.0625126	-0.108081	0.180228
170.3	-0.070159	0.0340202	0.157453	0.0868073	-0.155173	0.719988	0.0645382	-0.123317	0.18049
170.4	-0.0810337	0.0495966	0.157025	0.111391	-0.160385	0.686133	0.0677722	-0.137758	0.178604
170.5	-0.0924616	0.0625389	0.156759	0.136778	-0.166175	0.650465	0.0723338	-0.151126	0.174621
170.6	-0.104149	0.0728386	0.156405	0.162693	-0.172507	0.613366	0.0782891	-0.163131	0.168602
170.7	-0.115761	0.0805691	0.155718	0.18891	-0.179293	0.57523	0.085634	-0.173567	0.160697
170.8	-0.12699	0.0858868	0.154513	0.215208	-0.186438	0.536494	0.0942763	-0.182181	0.15109
170.9	-0.137539	0.0890053	0.152603	0.241302	-0.19387	0.497588	0.104019	-0.188807	0.140019
171	-0.147165	0.090205	0.149851	0.266933	-0.201523	0.458966	0.114629	-0.193262	0.127806
171.1	-0.155645	0.0897529	0.146171	0.291824	-0.209306	0.421032	0.125843	-0.195467	0.114733
171.2	-0.162778	0.087919	0.141536	0.315722	-0.217126	0.384194	0.137368	-0.195414	0.10116
171.3	-0.168385	0.0849836	0.135992	0.338379	-0.224867	0.348801	0.148887	-0.193138	0.0874095
171.4	-0.172371	0.081229	0.129633	0.359558	-0.232414	0.315144	0.160058	-0.188767	0.0738606
171.5	-0.174687	0.0769117	0.122621	0.379095	-0.23965	0.283463	0.170541	-0.182436	0.0608325
171.6	-0.17534	0.0722559	0.115195	0.396776	-0.246458	0.25388	0.180019	-0.174357	0.0486608
171.7	-0.17434	0.0674475	0.107602	0.412464	-0.252734	0.22646	0.188236	-0.164784	0.037657
171.8	-0.171747	0.0626648	0.100088	0.426054	-0.258382	0.20121	0.19499	-0.153955	0.0281007
171.9	-0.167638	0.0581053	0.0928654	0.437443	-0.263314	0.178088	0.200142	-0.14218	0.0201995
172	-0.162104	0.0539148	0.0861715	0.446598	-0.267462	0.156977	0.203606	-0.129776	0.0140874
172.1	-0.155263	0.0502441	0.0801956	0.45348	-0.270763	0.137715	0.205366	-0.117098	0.00983763
172.2	-0.147239	0.0472591	0.0751071	0.45809	-0.273159	0.120093	0.20549	-0.104497	0.00749636
172.3	-0.138109	0.0451048	0.0709942	0.460484	-0.274622	0.103909	0.204124	-0.092249	0.0070765
172.4	-0.12795	0.0439241	0.0678877	0.46073	-0.275154	0.0889153	0.201492	-0.080669	0.00845838
172.5	-0.116816	0.0438316	0.0657435	0.45895	-0.274766	0.0749153	0.197896	-0.0700165	0.0114932
172.6	-0.104761	0.0449369	0.0644238	0.455296	-0.273494	0.061705	0.193692	-0.060522	0.0159805
172.7	-0.0918169	0.0473488	0.0637962	0.449892	-0.271377	0.0491089	0.189234	-0.0524028	0.0216496
172.8	-0.0780039	0.051152	0.0636682	0.442909	-0.268447	0.0370163	0.184852	-0.0457997	0.0282438
172.9	-0.0633507	0.0564211	0.0638294	0.434547	-0.264775	0.0253548	0.180882	-0.0408257	0.0354233
173	-0.0478735	0.0632131	0.0640554	0.425001	-0.260463	0.0140919	0.177645	-0.0375355	0.0428507
173.1	-0.0316019	0.0715349	0.0641524	0.414484	-0.255617	0.00322952	0.175407	-0.0359432	0.0501838
173.2	-0.0145979	0.0813463	0.0639796	0.403181	-0.250328	-0.00721894	0.174368	-0.0360404	0.0570846
173.3	0.00304985	0.0925815	0.0634069	0.391266	-0.244689	-0.0171886	0.174687	-0.0377516	0.0632813
173.4	0.0211868	0.105157	0.0623485	0.378922	-0.23882	-0.0266014	0.176457	-0.0409784	0.0684865
173.5	0.0396175	0.118924	0.0607994	0.366343	-0.232857	-0.0354	0.179691	-0.045568	0.0725064
173.6	0.0581055	0.133701	0.0587904	0.353682	-0.226895	-0.0435768	0.184329	-0.0513821	0.0751433
173.7	0.0763674	0.149305	0.0564532	0.341084	-0.221017	-0.0510441	0.190266	-0.0582775	0.0763171
173.8	0.0941172	0.165528	0.0539778	0.328686	-0.215356	-0.0577808	0.19732	-0.0660104	0.0759673
173.9	0.111016	0.182159	0.0515593	0.316605	-0.210028	-0.0638081	0.205306	-0.0744402	0.0741527
174	0.126724	0.198973	0.0494298	0.304892	-0.205157	-0.0692001	0.214044	-0.0833936	0.071002
174.1	0.140976	0.215769	0.0478214	0.293631	-0.200838	-0.074062	0.223376	-0.0927332	0.0666835
174.2	0.153478	0.232313	0.0469385	0.282906	-0.197162	-0.0785271	0.233158	-0.102295	0.0614359
174.3	0.164001	0.248379	0.0469793	0.272791	-0.194164	-0.0827652	0.243271	-0.111905	0.0555422
174.4	0.172359	0.263739	0.0481027	0.2633	-0.191862	-0.0869576	0.253633	-0.121485	0.0492756
174.5	0.178483	0.278168	0.0504445	0.254488	-0.190244	-0.0913673	0.264209	-0.130893	0.0429735
174.6	0.18238	0.29144	0.0540667	0.246384	-0.189279	-0.0962349	0.274981	-0.140054	0.0369303
174.7	0.184178	0.303345	0.0590162	0.239031	-0.188928	-0.101783	0.285937	-0.148881	0.0314322
174.8	0.184072	0.313679	0.0652438	0.232494	-0.189102	-0.108228	0.297073	-0.157286	0.0267179
174.9	0.18237	0.322242	0.0726243	0.226809	-0.189683	-0.115749	0.308408	-0.165222	0.0229874
175	0.179467	0.328859	0.0809759	0.222034	-0.190552	-0.124494	0.319922	-0.172615	0.0203874
175.1	0.17579	0.333387	0.0900781	0.218283	-0.191554	-0.134557	0.331561	-0.17944	0.0189874
175.2	0.171829	0.335649	0.099684	0.215656	-0.192563	-0.146032	0.343227	-0.185626	0.018801
175.3	0.168086	0.33554	0.109535	0.214211	-0.193447	-0.158928	0.354752	-0.191094	0.0197239
175.4	0.165076	0.332976	0.119375	0.214043	-0.194093	-0.173156	0.365894	-0.195801	0.0216267
175.5	0.163234	0.327933	0.12891	0.215233	-0.194384	-0.188614	0.376341	-0.199695	0.0243082
175.6	0.162987	0.32044	0.137864	0.217833	-0.194255	-0.205141	0.385695	-0.202714	0.0275059
175.7	0.164671	0.310577	0.14599	0.221834	-0.193672	-0.222515	0.393559	-0.204809	0.030957
175.8	0.168546	0.298457	0.153091	0.227213	-0.192637	-0.240469	0.399533	-0.205932	0.034332
175.9	0.174747	0.284245	0.159014	0.23387	-0.191193	-0.258705	0.403181	-0.206047	0.0373602
176	0.18329	0.268183	0.163669	0.241684	-0.189399	-0.276905	0.404047	-0.205077	0.0397635
176.1	0.194079	0.250568	0.166973	0.250481	-0.18735	-0.294757	0.401718	-0.203029	0.0412908
176.2	0.206895	0.231731	0.168867	0.260031	-0.185152	-0.311931	0.395839	-0.199848	0.0417557
176.3	0.221416	0.212058	0.169341	0.270069	-0.182949	-0.328092	0.386132	-0.195484	0.0410302
176.4	0.237255	0.191913	0.168478	0.280325	-0.180886	-0.342889	0.372423	-0.189946	0.039057
176.5	0.253991	0.171619	0.166383	0.290461	-0.1791	-0.35601	0.354636	-0.18326	0.0358016
176.6	0.271153	0.151521	0.163158	0.30015	-0.177704	-0.367117	0.3328	-0.175439	0.0313509
176.7	0.28822	0.131943	0.158894	0.309141	-0.176783	-0.375887	0.307039	-0.166495	0.0257788
176.8	0.304692	0.11321	0.153695	0.31712	-0.176373	-0.381984	0.277591	-0.156456	0.0192623
176.9	0.320114	0.0956371	0.147648	0.323862	-0.176482	-0.385141	0.244834	-0.145396	0.0120351
177	0.334094	0.0795296	0.140861	0.329245	-0.177088	-0.385065	0.20921	-0.133384	0.00434184
177.1	0.346295	0.0651081	0.133422	0.333166	-0.178068	-0.381567	0.171241	-0.120587	-0.00351524
177.2	0.356477	0.0525501	0.125413	0.335627	-0.179241	-0.374485	0.131533	-0.107109	-0.0112922
177.3	0.36447	0.0419786	0.116857	0.3367	-0.180405	-0.363676	0.0906859	-0.0930671	-0.0187082
177.4	0.370194	0.0335195	0.107757	0.336548	-0.18134	-0.34913	0.0493181	-0.0785871	-0.0255055
177.5	0.373672	0.0272806	0.0980869	0.335388	-0.181799	-0.330894	0.00810007	-0.0638016	-0.0314584
177.6	0.375019	0.0233639	0.0878006	0.333494	-0.181514	-0.309055	-0.0323436	-0.0488899	-0.0363514
177.7	0.374422	0.0218351	0.0768588	0.331141	-0.180222	-0.28376	-0.0714287	-0.0339736	-0.0400431
177.8	0.372125	0.022723	0.06521	0.328636	-0.17772	-0.255306	-0.108615	-0.019198	-0.0423892
177.9	0.368438	0.0260609	0.0528373	0.326263	-0.173845	-0.224067	-0.14342	-0.00471145	-0.0433092
178	0.363711	0.0318697	0.0397922	0.324287	-0.168487	-0.190479	-0.175417	0.00944907	-0.0427644
178.1	0.358313	0.0401724	0.0261155	0.322941	-0.161587	-0.15508	-0.204234	0.0231694	-0.0407202
178.2	0.352599	0.0509584	0.0118983	0.322357	-0.153149	-0.118465	-0.229562	0.0363774	-0.0372233
178.3	0.346881	0.064183	-0.00272559	0.322594	-0.143275	-0.0812717	-0.251168	0.0490458	-0.0323107
178.4	0.341435	0.0797766	-0.0175634	0.323671	-0.132188	-0.0441433	-0.268835	0.0611154	-0.026067
178.5	0.336507	0.0976293	-0.0323745	0.32546	-0.12015	-0.00773964	-0.282427	0.0725897	-0.018594
178.6	0.332311	0.117589	-0.0468461	0.327768	-0.107477	0.0273041	-0.291873	0.0834615	-0.00998378
178.7	0.329013	0.139437	-0.0606418	0.330294	-0.0945224	0.0604233	-0.29716	0.0937529	-0.000391483
178.8	0.326735	0.162911	-0.0734236	0.332666	-0.0816397	0.0911068	-0.298338	0.103538	0.0100427
178.9	0.325552	0.187689	-0.0848569	0.334536	-0.0691823	0.118994	-0.295488	0.112858	0.021194
179	0.325448	0.213383	-0.094587	0.335506	-0.057516	0.143788	-0.288701	0.121803	0.0329032
179.1	0.326326	0.239562	-0.102269	0.335171	-0.0469698	0.16535	-0.278125	0.130426	0.0450821
179.2	0.328082	0.26576	-0.10757	0.333136	-0.0377726	0.183663	-0.263967	0.138825	0.0576036
179.3	0.330576	0.29148	-0.110315	0.329048	-0.0300979	0.198851	-0.246512	0.147146	0.0703454
179.4	0.333656	0.3162	-0.110377	0.322618	-0.024073	0.211163	-0.22609	0.155451	0.0831378
179.5	0.337141	0.339373	-0.107719	0.313654	-0.0197448	0.220955	-0.203069	0.163917	0.095881
179.6	0.34085	0.360469	-0.102395	0.302053	-0.0170769	0.228703	-0.177878	0.172595	0.108415
179.7	0.344589	0.378963	-0.0945745	0.287807	-0.0159578	0.234949	-0.151025	0.181584	0.120659
179.8	0.3482	0.394384	-0.0845107	0.270998	-0.0162162	0.240288	-0.123042	0.191018	0.13246
179.9	0.351533	0.406306	-0.0725353	0.251774	-0.0177035	0.245352	-0.0944883	0.200915	0.143698
180	0.3545	0.41438	-0.0590528	0.230362	-0.0202016	0.25075	-0.0659731	0.211387	0.154256
180.1	0.357041	0.418349	-0.0445644	0.207064	-0.0234999	0.257056	-0.0381275	0.222456	0.164008
180.2	0.35914	0.418087	-0.0296154	0.182241	-0.0273894	0.264828	-0.0115519	0.234139	0.172848
180.3	0.360803	0.413544	-0.01479	0.156267	-0.0316733	0.274517	0.013158	0.246451	0.180666
180.4	0.362081	0.404786	-0.00063077	0.129517	-0.0361933	0.286482	0.0353934	0.25928	0.187403
180.5	0.363104	0.391986	0.0123209	0.102409	-0.0408658	0.300991	0.0545529	0.27258	0.192975
180.6	0.364008	0.375397	0.0235509	0.0753021	-0.0456628	0.318192	0.070113	0.286198	0.19737
180.7	0.364922	0.355364	0.0326133	0.0485973	-0.0505976	0.338086	0.0816807	0.29997	0.200607
180.8	0.365967	0.332319	0.0391138	0.0226135	-0.055705	0.360585	0.0889795	0.313745	0.202703
180.9	0.367241	0.306748	0.0427216	-0.00235748	-0.0610141	0.385443	0.0918296	0.327312	0.203756
181	0.36883	0.279192	0.0432186	-0.0260983	-0.0665564	0.412348	0.0901262	0.340512	0.203893
181.1	0.37077	0.250271	0.0404473	-0.0484104	-0.0723666	0.440922	0.0838941	0.353095	0.203276
181.2	0.373055	0.220554	0.0343534	-0.0691109	-0.0784587	0.470688	0.0733043	0.364865	0.202134
181.3	0.375608	0.190604	0.0249916	-0.0880299	-0.084845	0.501168	0.0586745	0.375598	0.200675
181.4	0.378284	0.160916	0.0124777	-0.105082	-0.0914973	0.531832	0.0404752	0.385075	0.199187
181.5	0.380885	0.13195	-0.00298667	-0.120195	-0.09835	0.562189	0.0193119	0.393165	0.197916
181.6	0.383202	0.104108	-0.0211104	-0.133318	-0.105327	0.591698	-0.00412467	0.399717	0.197143
181.7	0.384973	0.0777452	-0.0415468	-0.144428	-0.112304	0.619851	-0.0290725	0.404619	0.197051
181.8	0.385927	0.0531204	-0.0638609	-0.153509	-0.119081	0.64618	-0.0546752	0.407776	0.19786
181.9	0.38578	0.030402	-0.087579	-0.160543	-0.125465	0.670319	-0.0800723	0.409106	0.199744
182	0.384235	0.00966338	-0.112226	-0.165545	-0.131263	0.692	-0.104448	0.408617	0.202762
182.1	0.381045	-0.00906202	-0.137258	-0.168581	-0.136276	0.711003	-0.127006	0.406286	0.20692
182.2	0.376046	-0.0258238	-0.162098	-0.169783	-0.14035	0.727154	-0.147015	0.4021	0.212124
182.3	0.369139	-0.0407059	-0.186171	-0.169317	-0.143389	0.740359	-0.163876	0.396156	0.218215
182.4	0.360299	-0.053796	-0.208922	-0.167337	-0.145372	0.750634	-0.177147	0.388587	0.224961
182.5	0.349575	-0.0652268	-0.229813	-0.164085	-0.146341	0.758036	-0.186531	0.379522	0.232027
182.6	0.33711	-0.0751335	-0.248341	-0.159798	-0.146355	0.76272	-0.191922	0.369073	0.239073
182.7	0.32313	-0.0836556	-0.264037	-0.154766	-0.14551	0.764857	-0.193426	0.357358	0.245677
182.8	0.307929	-0.0909416	-0.276553	-0.149258	-0.144012	0.764708	-0.191387	0.344634	0.251395
182.9	0.291884	-0.0971367	-0.285591	-0.143623	-0.142099	0.762539	-0.186328	0.331094	0.25577
183	0.275421	-0.10234	-0.29096	-0.138168	-0.140063	0.758671	-0.178896	0.316956	0.258331
183.1	0.258945	-0.106631	-0.292582	-0.1332	-0.138191	0.753395	-0.169825	0.302438	0.258705
183.2	0.24288	-0.110028	-0.290462	-0.129019	-0.136759	0.747033	-0.159913	0.287733	0.256548
183.3	0.227633	-0.112564	-0.284744	-0.125845	-0.136003	0.739882	-0.150014	0.273111	0.251633
183.4	0.213585	-0.114254	-0.275735	-0.123877	-0.136133	0.732226	-0.140971	0.258726	0.243777
183.5	0.201054	-0.115093	-0.263823	-0.123222	-0.137292	0.724358	-0.133558	0.244848	0.232907
183.6	0.190269	-0.115096	-0.249489	-0.123911	-0.139569	0.716515	-0.128429	0.23167	0.219064
183.7	0.181404	-0.1143	-0.233255	-0.125908	-0.142996	0.708887	-0.12611	0.219355	0.20234
183.8	0.174553	-0.112705	-0.215699	-0.129124	-0.147572	0.701666	-0.126945	0.208088	0.182966
183.9	0.169728	-0.110317	-0.197444	-0.133417	-0.15325	0.694989	-0.131077	0.19796	0.161213
184	0.166889	-0.107225	-0.179118	-0.138607	-0.159917	0.688944	-0.138435	0.189026	0.137437
184.1	0.165923	-0.103538	-0.161275	-0.144417	-0.167392	0.683596	-0.148743	0.181303	0.11204
184.2	0.166664	-0.0993654	-0.144402	-0.150574	-0.175482	0.678994	-0.161562	0.174699	0.0854495
184.3	0.168878	-0.0948536	-0.128912	-0.156775	-0.183977	0.675104	-0.176346	0.169172	0.0581207
184.4	0.172335	-0.090172	-0.115188	-0.162701	-0.192638	0.671872	-0.192428	0.164584	0.0305471
184.5	0.176762	-0.0855105	-0.103451	-0.168072	-0.20125	0.669203	-0.209061	0.160848	0.00320792
184.6	0.181925	-0.0810654	-0.0937947	-0.172613	-0.209635	0.666994	-0.225449	0.157726	-0.0234628
184.7	0.187578	-0.0770514	-0.086235	-0.176102	-0.217646	0.665141	-0.240824	0.154942	-0.0490317
184.8	0.193517	-0.0736706	-0.0807289	-0.178352	-0.225148	0.663498	-0.254492	0.152307	-0.0731547
184.9	0.199512	-0.0711653	-0.0771507	-0.179203	-0.232033	0.661959	-0.265851	0.149566	-0.0955019
185	0.205387	-0.0697586	-0.0753101	-0.178541	-0.23817	0.660401	-0.274409	0.146572	-0.115786
185.1	0.21102	-0.0696156	-0.0749877	-0.176331	-0.243473	0.658768	-0.279807	0.14312	-0.133771
185.2	0.216338	-0.0708401	-0.0759598	-0.172558	-0.247895	0.657002	-0.281843	0.139046	-0.149249
185.3	0.221301	-0.073518	-0.0779808	-0.167257	-0.251403	0.655051	-0.280439	0.134253	-0.162114
185.4	0.225875	-0.0776865	-0.0808149	-0.160482	-0.253997	0.652943	-0.275652	0.128639	-0.172295
185.5	0.230062	-0.0833456	-0.0842556	-0.152306	-0.255695	0.650675	-0.267687	0.122238	-0.17977
185.6	0.233866	-0.0904495	-0.0881811	-0.142826	-0.256556	0.648329	-0.256833	0.115045	-0.184581
185.7	0.237319	-0.0988619	-0.0924815	-0.132156	-0.25664	0.646014	-0.243479	0.107075	-0.186792
185.8	0.240428	-0.108385	-0.0970859	-0.120398	-0.256004	0.64391	-0.228025	0.0984517	-0.186546
185.9	0.243219	-0.118797	-0.101942	-0.107698	-0.254743	0.642205	-0.21088	0.0892383	-0.184006
186	0.245709	-0.129835	-0.107072	-0.0941753	-0.252978	0.641083	-0.192456	0.079548	-0.179371
186.1	0.247926	-0.141181	-0.112521	-0.079977	-0.250855	0.640757	-0.173142	0.0694652	-0.172856
186.2	0.249885	-0.152523	-0.118285	-0.0652313	-0.248566	0.641436	-0.153316	0.0590976	-0.164694
186.3	0.251577	-0.163532	-0.124381	-0.0501003	-0.246281	0.643315	-0.133333	0.0485717	-0.155158
186.4	0.252995	-0.173899	-0.130785	-0.03475	-0.24411	0.646565	-0.113481	0.0379425	-0.14449
186.5	0.254091	-0.183352	-0.137457	-0.0193634	-0.242169	0.651339	-0.0939598	0.027278	-0.132946
186.6	0.25483	-0.191621	-0.1443	-0.00411224	-0.240553	0.657729	-0.0749207	0.0165686	-0.120782
186.7	0.255157	-0.198469	-0.151182	0.0107975	-0.239372	0.665795	-0.0564619	0.00579629	-0.108259
186.8	0.255028	-0.203725	-0.157901	0.0251217	-0.238702	0.675543	-0.038661	-0.00504042	-0.0956099
186.9	0.254389	-0.207272	-0.16425	0.0386314	-0.238548	0.686964	-0.0215839	-0.0159667	-0.0830691
187	0.253242	-0.209071	-0.169995	0.0511112	-0.23887	0.700001	-0.00528424	-0.026981	-0.0708718
187.1	0.251562	-0.209142	-0.174908	0.0623646	-0.239602	0.714583	0.0102136	-0.0380881	-0.059217
187.2	0.249317	-0.20757	-0.178704	0.0722027	-0.240648	0.730576	0.0248942	-0.0493351	-0.0483222
187.3	0.246484	-0.204494	-0.181111	0.0803967	-0.24187	0.747832	0.038746	-0.0606707	-0.0383911
187.4	0.243044	-0.200091	-0.1819	0.0867825	-0.243112	0.766196	0.0517343	-0.0720891	-0.0295851
187.5	0.238995	-0.194555	-0.180897	0.0912151	-0.244209	0.785471	0.0638128	-0.0835746	-0.0221252
187.6	0.234352	-0.188108	-0.177969	0.0936165	-0.244992	0.805498	0.0748979	-0.0950408	-0.0162098
187.7	0.229118	-0.180996	-0.173062	0.093935	-0.245298	0.826071	0.0849082	-0.106409	-0.0120652
187.8	0.223271	-0.173467	-0.166191	0.0921822	-0.244986	0.84693	0.0937649	-0.11754	-0.00983405
187.9	0.216787	-0.16574	-0.157453	0.0884285	-0.243942	0.867823	0.101403	-0.128261	-0.00972271
188	0.209684	-0.158047	-0.147085	0.0828152	-0.242114	0.888455	0.10778	-0.138517	-0.0118978
188.1	0.201974	-0.150608	-0.135363	0.0755501	-0.239527	0.908581	0.112861	-0.148175	-0.0164697
188.2	0.193681	-0.14362	-0.122607	0.0668259	-0.236261	0.927893	0.116584	-0.157095	-0.0235515
188.3	0.184846	-0.13722	-0.109198	0.056921	-0.232406	0.94607	0.11892	-0.165088	-0.0331953
188.4	0.175492	-0.131503	-0.0955917	0.0461216	-0.228035	0.962763	0.119896	-0.171952	-0.0453715
188.5	0.165684	-0.126525	-0.082258	0.0347767	-0.223286	0.977654	0.119578	-0.177513	-0.0600135
188.6	0.155527	-0.122334	-0.0696477	0.023222	-0.218308	0.990384	0.11802	-0.181587	-0.0769689
188.7	0.145216	-0.118982	-0.0581834	0.0118046	-0.213296	1.00064	0.115301	-0.184067	-0.0960188
188.8	0.134976	-0.116524	-0.0482373	0.000879288	-0.208476	1.00814	0.111524	-0.184858	-0.116869
188.9	0.125067	-0.114982	-0.0401299	-0.0092659	-0.204039	1.01267	0.106803	-0.183888	-0.139149
189	0.115783	-0.11438	-0.0340995	-0.0182953	-0.200144	1.01405	0.101313	-0.181101	-0.162434
189.1	0.107464	-0.114706	-0.0303076	-0.0259361	-0.196948	1.01219	0.0952317	-0.176471	-0.186213
189.2	0.10047	-0.115941	-0.0288152	-0.0319519	-0.194583	1.0071	0.0887213	-0.170016	-0.209975
189.3	0.095212	-0.118022	-0.0295587	-0.0361271	-0.19313	0.998885	0.0819632	-0.161785	-0.233168
189.4	0.0921087	-0.120854	-0.0323955	-0.0383186	-0.192635	0.987723	0.0751288	-0.151899	-0.255284
189.5	0.0915546	-0.124371	-0.0371245	-0.0384521	-0.193145	0.973893	0.0683611	-0.140482	-0.275765
189.6	0.0938759	-0.128513	-0.0434756	-0.0365105	-0.194683	0.957768	0.061818	-0.127696	-0.294118
189.7	0.0993471	-0.133185	-0.0510926	-0.0324936	-0.197245	0.939803	0.0556606	-0.113719	-0.309882
189.8	0.108163	-0.138258	-0.0595944	-0.0264492	-0.200795	0.920493	0.0500244	-0.0987678	-0.322718
189.9	0.120424	-0.143555	-0.068585	-0.018486	-0.205316	0.900357	0.0450087	-0.0830775	-0.332359
190	0.136101	-0.148873	-0.0776188	-0.00874519	-0.21079	0.879908	0.0406842	-0.0668598	-0.338616
190.1	0.15502	-0.154028	-0.0862958	0.00260162	-0.217186	0.859684	0.0370461	-0.0503331	-0.341371
190.2	0.176856	-0.158824	-0.0942766	0.0153408	-0.224458	0.840224	0.0340711	-0.0336989	-0.340614
190.3	0.201164	-0.163076	-0.101269	0.0292416	-0.232558	0.822029	0.0317262	-0.01722	-0.336468
190.4	0.227409	-0.166626	-0.107019	0.044035	-0.241392	0.805506	0.0299516	-0.00110978	-0.329116
190.5	0.254925	-0.169313	-0.11133	0.0593891	-0.250903	0.790953	0.0286525	0.0144544	-0.318815
190.6	0.28302	-0.170978	-0.114079	0.0750103	-0.261038	0.778612	0.0277218	0.0293004	-0.30594
190.7	0.310933	-0.171507	-0.115216	0.090517	-0.271727	0.768622	0.0270466	0.0432987	-0.290836
190.8	0.337909	-0.170801	-0.114749	0.105579	-0.282837	0.761032	0.0265568	0.0562414	-0.273891
190.9	0.363187	-0.168815	-0.112749	0.119862	-0.294221	0.755787	0.0261691	0.0679575	-0.255512
191	0.386061	-0.16557	-0.109364	0.133017	-0.30571	0.752722	0.0258186	0.0783331	-0.23604
191.1	0.405937	-0.161101	-0.104783	0.144722	-0.317137	0.751612	0.0254584	0.087218	-0.215892
191.2	0.422369	-0.155445	-0.0992581	0.154665	-0.328334	0.752137	0.0251034	0.0944596	-0.1954
191.3	0.435026	-0.148714	-0.0930497	0.162539	-0.339083	0.753928	0.0248278	0.0999172	-0.174861
191.4	0.443748	-0.141052	-0.0863961	0.168116	-0.349171	0.756527	0.0247498	0.103466	-0.154491
191.5	0.448538	-0.132593	-0.0795247	0.171181	-0.35841	0.759468	0.0250277	0.104954	-0.134467
191.6	0.449519	-0.123459	-0.0726478	0.171608	-0.366618	0.762247	0.0258631	0.10427	-0.114908
191.7	0.446971	-0.113773	-0.0659922	0.16934	-0.373619	0.764374	0.0274712	0.101303	-0.0958726
191.8	0.441284	-0.103634	-0.0598019	0.164417	-0.379247	0.765364	0.0300868	0.0959901	-0.0773907
191.9	0.432976	-0.0931475	-0.0542194	0.156948	-0.383347	0.764777	0.0339363	0.088254	-0.0594261
192	0.422597	-0.0823748	-0.0493237	0.147074	-0.385852	0.762204	0.0392286	0.0780906	-0.0418801
192.1	0.410745	-0.0713656	-0.0451627	0.135071	-0.386744	0.757306	0.0461051	0.0655044	-0.0246665
192.2	0.398046	-0.0601465	-0.0417358	0.1213	-0.386047	0.74976	0.0546474	0.050573	-0.00763512
192.3	0.385095	-0.0486986	-0.0389593	0.106159	-0.383791	0.73934	0.0648848	0.0334072	0.00931454
192.4	0.372437	-0.0369818	-0.036722	0.0901279	-0.380066	0.725869	0.0767331	0.0141647	0.0262809
192.5	0.360554	-0.024954	-0.0348769	0.0736732	-0.375003	0.709307	0.0900348	-0.00692982	0.0433354
192.6	0.349823	-0.0125639	-0.0332796	0.0573254	-0.36874	0.68964	0.104538	-0.0295451	0.0605309
192.7	0.34054	0.00023917	-0.0317242	0.0415974	-0.361473	0.666956	0.119883	-0.0532895	0.0778899
192.8	0.332885	0.0135029	-0.029957	0.0269756	-0.353388	0.641398	0.135632	-0.0777256	0.0953798
192.9	0.326962	0.0272539	-0.027765	0.0138912	-0.344689	0.613211	0.151289	-0.102365	0.112929
193	0.322751	0.0414818	-0.0249747	0.00271797	-0.335582	0.582667	0.166327	-0.126713	0.130402
193.1	0.320164	0.0561197	-0.0214212	-0.0062294	-0.326268	0.550135	0.180207	-0.150162	0.147595
193.2	0.319011	0.0710829	-0.0169857	-0.0127106	-0.316945	0.516037	0.192417	-0.172141	0.164276
193.3	0.319057	0.0862596	-0.0115699	-0.0166302	-0.307779	0.480784	0.202498	-0.192084	0.180211
193.4	0.320049	0.101462	-0.0051717	-0.0179482	-0.29888	0.444809	0.210059	-0.209439	0.19513
193.5	0.321706	0.116466	0.00213941	-0.0167236	-0.290322	0.408572	0.214793	-0.223736	0.208745
193.6	0.323691	0.13104	0.0102282	-0.0131016	-0.282141	0.372511	0.216482	-0.234582	0.220816
193.7	0.325691	0.144927	0.0188771	-0.00726318	-0.274359	0.337029	0.215043	-0.241668	0.231051
193.8	0.327438	0.157843	0.0278012	0.00053215	-0.266943	0.302519	0.210494	-0.244786	0.239216
193.9	0.328708	0.169525	0.0366506	0.010006	-0.259807	0.269347	0.202976	-0.243845	0.24511
194	0.329299	0.179766	0.0450842	0.0208492	-0.252829	0.23777	0.192728	-0.238914	0.248622
194.1	0.329055	0.188415	0.0527452	0.0327816	-0.24586	0.208031	0.180099	-0.230164	0.24965
194.2	0.327901	0.195378	0.0592455	0.0455399	-0.238746	0.180279	0.165549	-0.217909	0.248152
194.3	0.325842	0.200656	0.0642387	0.0588818	-0.231347	0.154601	0.14959	-0.202586	0.244197
194.4	0.322886	0.204327	0.0673966	0.0725918	-0.223563	0.131012	0.132744	-0.184691	0.237851
194.5	0.319092	0.206534	0.0684722	0.086483	-0.21529	0.109467	0.115496	-0.164814	0.229265
194.6	0.314528	0.207467	0.0672994	0.100435	-0.206451	0.0898632	0.0983363	-0.143577	0.21866
194.7	0.309341	0.20738	0.0637999	0.114389	-0.196998	0.0720486	0.081708	-0.121614	0.2063
194.8	0.303689	0.20659	0.0579786	0.128315	-0.186951	0.0558132	0.0659817	-0.0996017	0.192484
194.9	0.297743	0.205484	0.0499768	0.142141	-0.176373	0.0409092	0.0514816	-0.0781387	0.177516
195	0.291641	0.204459	0.0400161	0.15587	-0.165388	0.0270962	0.038455	-0.0577113	0.161794
195.1	0.285514	0.203857	0.0283405	0.169445	-0.154177	0.0141205	0.0270413	-0.0387704	0.145654
195.2	0.279444	0.203999	0.0152575	0.182903	-0.142975	0.00180854	0.0172985	-0.0216272	0.129465
195.3	0.273485	0.205174	0.00111582	0.196213	-0.132051	-0.0100323	0.009205	-0.0065555	0.113612
195.4	0.267642	0.207586	-0.0136969	0.209322	-0.121676	-0.0215069	0.00265455	0.00630486	0.0984175
195.5	0.261876	0.211406	-0.0288066	0.222191	-0.112124	-0.0327526	-0.00252084	0.0168755	0.0842326
195.6	0.256124	0.216704	-0.043896	0.234741	-0.103659	-0.0438744	-0.00650618	0.0251971	0.0713542
195.7	0.250294	0.223476	-0.0586494	0.246876	-0.0965189	-0.0549007	-0.00948576	0.03135	0.0600393
195.8	0.244278	0.231637	-0.0728149	0.258482	-0.090917	-0.0658222	-0.0116864	0.0354962	0.0504856
195.9	0.237907	0.241031	-0.0862036	0.269463	-0.0870265	-0.0765568	-0.0133692	0.0377856	0.0428162
196	0.230998	0.251481	-0.0986922	0.279667	-0.0850166	-0.0870873	-0.0147768	0.0383771	0.0371168
196.1	0.223382	0.262748	-0.110238	0.288973	-0.0849384	-0.097364	-0.0161031	0.0374739	0.0333815
196.2	0.214933	0.274611	-0.120862	0.297293	-0.0867623	-0.107332	-0.0174613	0.0351976	0.0315385
196.3	0.205565	0.286832	-0.130596	0.30455	-0.0904378	-0.116922	-0.018905	0.03164	0.0314121
196.4	0.195231	0.299182	-0.1395	0.310617	-0.0958819	-0.126114	-0.0204422	0.0268841	0.0327795
196.5	0.183892	0.311463	-0.147625	0.315397	-0.102922	-0.134889	-0.0220105	0.0209633	0.0353832
196.6	0.171539	0.323537	-0.155047	0.318823	-0.111347	-0.143261	-0.023502	0.0139194	0.0388861
196.7	0.158251	0.335324	-0.16185	0.320791	-0.120915	-0.151298	-0.0247725	0.00579208	0.0429883
196.8	0.14415	0.346803	-0.168102	0.321249	-0.131349	-0.15909	-0.0256045	-0.00336135	0.0473521
196.9	0.129427	0.357929	-0.17385	0.32016	-0.142365	-0.166765	-0.0257392	-0.0135178	0.0516372
197	0.114264	0.368707	-0.179131	0.317495	-0.153674	-0.174432	-0.0248886	-0.0245714	0.0555716
197.1	0.0988951	0.379171	-0.183959	0.31316	-0.164952	-0.182216	-0.0227726	-0.0363708	0.0589368
197.2	0.0835896	0.389341	-0.188349	0.307062	-0.175907	-0.190229	-0.0191404	-0.0487253	0.0616229
197.3	0.068614	0.399217	-0.192291	0.299141	-0.186288	-0.198572	-0.0138015	-0.0613743	0.0636058
197.4	0.0542374	0.408788	-0.195764	0.289385	-0.195859	-0.207288	-0.00659886	-0.0740296	0.0649581
197.5	0.0407133	0.418046	-0.198716	0.277809	-0.204361	-0.216405	0.00260068	-0.086361	0.0658026
197.6	0.0283089	0.42692	-0.201143	0.264395	-0.211568	-0.225889	0.0138914	-0.0980161	0.0663939
197.7	0.0172853	0.435232	-0.203072	0.249126	-0.217316	-0.235702	0.0272686	-0.108619	0.0670664
197.8	0.00788689	0.442729	-0.20453	0.231985	-0.221502	-0.245741	0.042637	-0.117786	0.0682113
197.9	0.000323296	0.449079	-0.205521	0.213055	-0.224054	-0.255844	0.0598275	-0.125129	0.0702317
198	-0.00521469	0.453902	-0.206133	0.19245	-0.224935	-0.265848	0.0786193	-0.130358	0.0735474
198.1	-0.00858116	0.456785	-0.206402	0.170305	-0.224146	-0.275552	0.0987464	-0.133253	0.078486
198.2	-0.00964069	0.45725	-0.206375	0.146839	-0.221718	-0.284776	0.119925	-0.13362	0.0853603
198.3	-0.00832367	0.454864	-0.206113	0.122288	-0.217716	-0.29334	0.141849	-0.131371	0.0944202
198.4	-0.00459099	0.449181	-0.205686	0.0969543	-0.212211	-0.301063	0.164161	-0.126546	0.105787
198.5	0.00151825	0.439832	-0.205146	0.0711308	-0.205289	-0.307771	0.186515	-0.119272	0.119482
198.6	0.00989246	0.426489	-0.204552	0.0451794	-0.197061	-0.313306	0.208584	-0.109739	0.135433
198.7	0.0203943	0.408974	-0.203926	0.0194988	-0.187633	-0.317577	0.23007	-0.0982277	0.153416
198.8	0.0328312	0.387228	-0.203274	-0.005476	-0.177128	-0.32052	0.250681	-0.0850536	0.173113
198.9	0.0469599	0.36137	-0.202572	-0.0293217	-0.165675	-0.322145	0.270134	-0.0705909	0.194149
199	0.0624275	0.331634	-0.201788	-0.05163	-0.153395	-0.322466	0.288177	-0.0552952	0.216056
199.1	0.0788364	0.298402	-0.200885	-0.0719814	-0.140426	-0.321546	0.304597	-0.0395975	0.238366
199.2	0.0956841	0.262223	-0.199845	-0.089983	-0.126908	-0.319532	0.319188	-0.023912	0.26058
199.3	0.112497	0.223795	-0.198597	-0.105255	-0.112989	-0.316516	0.331783	-0.00870484	0.282229
199.4	0.128756	0.183944	-0.197082	-0.117481	-0.0988211	-0.3127	0.342223	0.00564605	0.302862
199.5	0.143969	0.143547	-0.195241	-0.126438	-0.0845794	-0.308216	0.350343	0.0187662	0.322138
199.6	0.15764	0.103539	-0.193023	-0.131956	-0.070454	-0.303239	0.355998	0.0303081	0.339769
199.7	0.169313	0.0648439	-0.190352	-0.133957	-0.056683	-0.297914	0.359046	0.0400022	0.355541
[truncated: 5,003 more rows]

## Sheet: MES-
	I(pA)
time(ms)	16n29017.abf	17105001.abf	17105003.abf	17105007.abf	17105008.abf	17105012.abf	17105015.abf	17105018.abf	17105028.abf	17105031.abf	17105032.abf	17105035.abf	17122017.abf	17122020.abf	17122022.abf		Currents were evoked by application of 100uM cocaine in absence of extracellular chloride.
0	0.122586	-0.160237	-0.0846884	-0.0480413	-0.200195	0.301722	0.0334069	-0.220718	0.0782148	-0.536438	-0.232631	0.0516785	0.166804	-0.0962274	0.0625249
0.100098	0.116029	-0.173693	-0.0912592	-0.0446797	-0.186269	0.309394	0.0468958	-0.208295	0.0660809	-0.536441	-0.201967	0.032471	0.151738	-0.084428	0.0658323
0.200195	0.109222	-0.187493	-0.0988962	-0.0437347	-0.174703	0.314145	0.061952	-0.193669	0.0524927	-0.535525	-0.169895	0.0121707	0.136255	-0.0717551	0.0702192
0.299805	0.102163	-0.201245	-0.107413	-0.0453303	-0.16555	0.315885	0.0780158	-0.176842	0.0376657	-0.533579	-0.13687	-0.00920341	0.120289	-0.058529	0.0755216
0.399902	0.0948694	-0.214519	-0.1166	-0.0495656	-0.158735	0.314578	0.0944573	-0.157855	0.0218202	-0.530483	-0.103317	-0.031617	0.10382	-0.0451503	0.0814897
0.5	0.0873613	-0.226951	-0.126135	-0.0564593	-0.154123	0.310342	0.110666	-0.136864	0.00520975	-0.526124	-0.0697179	-0.0550453	0.0867992	-0.0320838	0.0879747
0.600098	0.0796666	-0.238148	-0.135689	-0.0660296	-0.151531	0.303371	0.126024	-0.114032	-0.0118966	-0.520365	-0.036498	-0.0793722	0.0693281	-0.0197923	0.0947305
0.700195	0.0718332	-0.247827	-0.144835	-0.0781957	-0.150704	0.293977	0.139972	-0.089649	-0.0292003	-0.513083	-0.00412298	-0.104458	0.0514972	-0.00873679	0.10162
0.799805	0.0638891	-0.255737	-0.153206	-0.0928185	-0.151355	0.282512	0.152015	-0.06401	-0.0464839	-0.50413	0.0270294	-0.130074	0.0334169	0.000649759	0.10849
0.899902	0.0558926	-0.261653	-0.160408	-0.109675	-0.153163	0.269417	0.161793	-0.0374999	-0.0635216	-0.493406	0.0566295	-0.155953	0.0152568	0.00792112	0.115185
1	0.0478783	-0.265474	-0.166109	-0.128535	-0.15583	0.255154	0.169004	-0.0105087	-0.0801053	-0.480784	0.0843258	-0.181775	-0.00271031	0.0126735	0.121544
1.1001	0.0398975	-0.267114	-0.169995	-0.149164	-0.159044	0.240181	0.17354	0.0164878	-0.0960786	-0.466187	0.109895	-0.207199	-0.020249	0.0146195	0.127442
1.2002	0.0319966	-0.266572	-0.171879	-0.171182	-0.162527	0.224997	0.175409	0.0430009	-0.111279	-0.449535	0.133096	-0.231796	-0.0369792	0.0135462	0.132794
1.2998	0.0242077	-0.263879	-0.171597	-0.194225	-0.165976	0.210011	0.174682	0.0685512	-0.125612	-0.430775	0.153777	-0.255167	-0.0525398	0.00932193	0.137459
1.3999	0.0165767	-0.259173	-0.169083	-0.217868	-0.169117	0.195629	0.171633	0.0926776	-0.138957	-0.409849	0.171811	-0.276862	-0.0665559	0.00195248	0.141354
1.5	0.0091384	-0.25257	-0.164341	-0.241661	-0.171673	0.182143	0.166559	0.114956	-0.151235	-0.386816	0.187127	-0.296443	-0.0786209	-0.00850812	0.14439
1.6001	0.001924	-0.244298	-0.157425	-0.265218	-0.173381	0.169777	0.159874	0.134989	-0.162379	-0.361792	0.199726	-0.313471	-0.0883902	-0.0218914	0.146546
1.7002	-0.00502666	-0.234523	-0.148499	-0.288105	-0.173993	0.158671	0.152067	0.152472	-0.172303	-0.334927	0.209589	-0.327522	-0.0954953	-0.0378898	0.147728
1.7998	-0.0116803	-0.223517	-0.137737	-0.30994	-0.173318	0.148875	0.143623	0.167172	-0.180945	-0.306485	0.216749	-0.338259	-0.0996058	-0.0561578	0.147965
1.8999	-0.0180048	-0.211514	-0.125385	-0.33037	-0.171144	0.140361	0.13504	0.178919	-0.188217	-0.276734	0.22125	-0.345401	-0.100458	-0.0763142	0.147198
2	-0.0239657	-0.198798	-0.111729	-0.349137	-0.167317	0.133025	0.126765	0.187649	-0.193975	-0.245996	0.223176	-0.348718	-0.0978536	-0.0978966	0.145493
2.1001	-0.0295264	-0.185624	-0.0970385	-0.365997	-0.161687	0.126687	0.119206	0.193371	-0.198132	-0.214643	0.222667	-0.348083	-0.0916042	-0.120437	0.142895
2.2002	-0.0346506	-0.17224	-0.0815947	-0.380742	-0.154124	0.121141	0.112732	0.196215	-0.200558	-0.183072	0.21984	-0.343466	-0.081704	-0.143416	0.139443
2.2998	-0.039308	-0.158894	-0.0656988	-0.39325	-0.144564	0.116149	0.107571	0.196377	-0.201179	-0.151762	0.214827	-0.334914	-0.0681552	-0.166292	0.135246
2.3999	-0.0434474	-0.145828	-0.0495779	-0.403425	-0.132972	0.11148	0.10392	0.194136	-0.19991	-0.121207	0.207771	-0.322635	-0.0511102	-0.188606	0.130333
2.5	-0.0470393	-0.133268	-0.0334742	-0.4113	-0.119384	0.106931	0.101927	0.189847	-0.196675	-0.0918831	0.198814	-0.306878	-0.0308021	-0.209959	0.124817
2.6001	-0.0500362	-0.121393	-0.0175612	-0.416976	-0.1039	0.102314	0.101595	0.183899	-0.19145	-0.0642201	0.188095	-0.288027	-0.00762663	-0.229958	0.118778
2.7002	-0.0524005	-0.110373	-0.0020277	-0.420574	-0.0866233	0.0975225	0.102928	0.176683	-0.18429	-0.0386228	0.175792	-0.266546	0.0180527	-0.248241	0.112324
2.7998	-0.0541007	-0.100361	0.0130747	-0.422263	-0.0677967	0.0924949	0.105835	0.168624	-0.175281	-0.0154306	0.16202	-0.242955	0.0456875	-0.264552	0.105568
2.8999	-0.0551147	-0.0914131	0.0276182	-0.422213	-0.0477016	0.0872458	0.110196	0.160129	-0.164631	0.00510434	0.146939	-0.217843	0.0746934	-0.278673	0.0986177
3	-0.0554238	-0.0836254	0.0415915	-0.420665	-0.0267113	0.0818768	0.115923	0.151548	-0.152555	0.0228015	0.130715	-0.19184	0.104383	-0.290378	0.0915414
3.1001	-0.0550183	-0.0770336	0.0549505	-0.417814	-0.00524485	0.076523	0.122838	0.143186	-0.139329	0.0375651	0.113514	-0.165594	0.134053	-0.299508	0.0844156
3.2002	-0.0539036	-0.0716282	0.0677336	-0.413936	0.0163198	0.0714229	0.130848	0.135258	-0.125335	0.0493628	0.0955293	-0.139769	0.163	-0.305998	0.0773107
3.2998	-0.0520897	-0.067352	0.0799158	-0.409214	0.0375421	0.0668168	0.1398	0.127934	-0.110974	0.0582956	0.0769247	-0.114911	0.190504	-0.309774	0.0702878
3.3999	-0.0496141	-0.0640898	0.0914801	-0.403835	0.0579776	0.0630364	0.149575	0.121312	-0.0967329	0.0645464	0.0578531	-0.0915956	0.215904	-0.310763	0.063408
3.5	-0.0465215	-0.0617362	0.102419	-0.398	0.0772227	0.0604025	0.160104	0.11542	-0.0830584	0.0683847	0.0385008	-0.0702546	0.238564	-0.308908	0.0567247
3.6001	-0.042861	-0.060115	0.11272	-0.391839	0.0949002	0.0592296	0.171277	0.110186	-0.0704482	0.0701364	0.0190321	-0.0512961	0.257986	-0.304195	0.0502721
3.7002	-0.038704	-0.0590336	0.122331	-0.385452	0.110693	0.0597809	0.182986	0.10546	-0.0593591	0.0701581	-0.000371653	-0.0350096	0.273704	-0.296668	0.0440503
3.7998	-0.0341257	-0.0582725	0.131178	-0.378942	0.124337	0.0623369	0.195147	0.101053	-0.0502012	0.068881	-0.019518	-0.0215193	0.285453	-0.286343	0.0381433
3.8999	-0.0292269	-0.0575872	0.139118	-0.372421	0.135664	0.0670519	0.20769	0.0967356	-0.0433913	0.0667566	-0.0382462	-0.0108728	0.293054	-0.273328	0.0325681
4	-0.0240859	-0.0567328	0.146044	-0.365952	0.14461	0.0740787	0.220492	0.0923071	-0.039223	0.0642072	-0.0564198	-0.00300345	0.296478	-0.257713	0.0274164
4.1001	-0.0188056	-0.0555026	0.15179	-0.359617	0.151169	0.0833905	0.233474	0.0875534	-0.0379406	0.0616425	-0.0739486	0.00222602	0.295847	-0.239677	0.0227128
4.2002	-0.0134821	-0.0536716	0.156181	-0.353459	0.155479	0.0949511	0.246489	0.0822676	-0.039707	0.0594365	-0.0907813	0.005039	0.291367	-0.219417	0.0185243
4.2998	-0.00820111	-0.0511367	0.159082	-0.347502	0.157767	0.108575	0.259391	0.0763147	-0.0446177	0.0579381	-0.10692	0.00572337	0.283406	-0.197192	0.0148984
4.3999	-0.00306467	-0.0477449	0.16032	-0.341811	0.158277	0.123989	0.272021	0.0696012	-0.0526679	0.0574235	-0.122362	0.00461103	0.27242	-0.173296	0.0118772
4.5	0.00186234	-0.0434782	0.159771	-0.336422	0.157305	0.140852	0.284246	0.0621362	-0.0637489	0.0581185	-0.137199	0.0020491	0.258946	-0.148139	0.00949491
4.6001	0.0065082	-0.0382998	0.157274	-0.331454	0.155176	0.158766	0.295911	0.0539941	-0.0776852	0.0602154	-0.151474	-0.00158679	0.243574	-0.122145	0.00785077
4.7002	0.01083	-0.0322955	0.152809	-0.326931	0.152227	0.177246	0.306861	0.0453047	-0.0942851	0.0637466	-0.16531	-0.00597596	0.226915	-0.0957848	0.00694097
4.7998	0.0147881	-0.0255816	0.14641	-0.322886	0.148781	0.195782	0.31697	0.0362833	-0.113263	0.0687198	-0.17882	-0.0108229	0.209613	-0.0695945	0.00679029
4.8999	0.0183685	-0.0184342	0.138185	-0.319306	0.14512	0.213804	0.326079	0.0271932	-0.134313	0.0750698	-0.192172	-0.0158834	0.192225	-0.044129	0.00737203
5	0.0215579	-0.01107	0.128303	-0.316193	0.141466	0.230755	0.334115	0.0183778	-0.157105	0.0826313	-0.205531	-0.0210108	0.175339	-0.0199177	0.00864042
5.1001	0.0243922	-0.00386785	0.117018	-0.31353	0.137996	0.246107	0.341001	0.0101914	-0.181252	0.0911865	-0.21907	-0.0261058	0.159453	0.00251891	0.0105745
5.2002	0.0268791	0.00282882	0.104618	-0.311282	0.134794	0.259343	0.34669	0.00299496	-0.206393	0.100453	-0.232956	-0.0311835	0.144982	0.022724	0.013096
5.2998	0.0290828	0.00863285	0.0914801	-0.309357	0.131904	0.270047	0.351197	-0.00285449	-0.232172	0.11009	-0.247292	-0.0362612	0.132339	0.0402359	0.0161153
5.3999	0.0310442	0.0132168	0.0780085	-0.3077	0.129278	0.277842	0.354552	-0.00708323	-0.258244	0.119728	-0.262202	-0.0414324	0.121787	0.0547055	0.0195466
5.5	0.0328375	0.0162265	0.0646418	-0.306188	0.126755	0.28245	0.356794	-0.00943605	-0.284254	0.128989	-0.277703	-0.0468496	0.113548	0.0658438	0.0232583
5.6001	0.0345353	0.0173728	0.0518091	-0.304658	0.124159	0.283687	0.35802	-0.00976186	-0.309848	0.137527	-0.293838	-0.0526351	0.107766	0.0734755	0.0271188
5.7002	0.0362082	0.0164248	0.0399778	-0.302969	0.121245	0.281455	0.358335	-0.00795702	-0.334736	0.144945	-0.310565	-0.0589507	0.104435	0.0775692	0.0310384
5.7998	0.0379469	0.0132395	0.0295237	-0.300925	0.117725	0.275766	0.357803	-0.00400984	-0.358602	0.150889	-0.327818	-0.0658862	0.103558	0.0781763	0.0349218
5.8999	0.039824	0.00777364	0.0207766	-0.29837	0.113316	0.266736	0.356557	0.00198721	-0.381151	0.155061	-0.345478	-0.0735407	0.105098	0.0754493	0.0386487
6	0.0419098	7.17388e-05	0.0139692	-0.295104	0.107739	0.254621	0.354684	0.00984059	-0.402133	0.157154	-0.363354	-0.0819773	0.10894	0.0696598	0.0421373
6.1001	0.0442696	-0.00972825	0.00922184	-0.290931	0.100768	0.239711	0.352274	0.0192604	-0.421269	0.156968	-0.381274	-0.0911693	0.114897	0.0611955	0.0453454
6.2002	0.0469808	-0.0213765	0.00657635	-0.285674	0.092157	0.222425	0.349408	0.0298896	-0.438314	0.154346	-0.398913	-0.101065	0.122779	0.0504996	0.0482656
6.2998	0.0500893	-0.0345563	0.00593166	-0.279173	0.0817402	0.203233	0.346141	0.0413369	-0.453007	0.149212	-0.416015	-0.111481	0.132299	0.0380814	0.0508806
6.3999	0.0536388	-0.0488475	0.00713329	-0.271316	0.0694046	0.182688	0.342554	0.0531809	-0.465124	0.141564	-0.432222	-0.12222	0.143171	0.0244863	0.0532762
6.5	0.0576537	-0.0638221	0.00990658	-0.261957	0.0550851	0.161383	0.338695	0.0649816	-0.474416	0.13149	-0.447261	-0.13301	0.155128	0.0102988	0.0554658
6.6001	0.0621505	-0.0789627	0.0139101	-0.251063	0.0388089	0.139933	0.334596	0.0762782	-0.48073	0.119145	-0.460783	-0.143545	0.167846	-0.00388372	0.0575792
6.7002	0.0671234	-0.093798	0.0187262	-0.238615	0.0206492	0.118948	0.330249	0.0866818	-0.483902	0.104759	-0.472464	-0.153492	0.181007	-0.0174655	0.0596792
6.7998	0.0725578	-0.107794	0.0239485	-0.224679	0.000757656	0.0990565	0.325704	0.0958141	-0.48376	0.0886041	-0.481928	-0.162505	0.194344	-0.0298951	0.0618516
6.8999	0.0784331	-0.120497	0.0291555	-0.209305	-0.0206379	0.0808184	0.3209	0.103402	-0.480227	0.0710759	-0.488883	-0.170255	0.207514	-0.0406883	0.0641919
7	0.0846949	-0.131452	0.033964	-0.192643	-0.0433	0.064793	0.315801	0.109213	-0.473223	0.0525906	-0.493035	-0.176404	0.220297	-0.0494456	0.0668107
7.1001	0.0912836	-0.140331	0.0379866	-0.174888	-0.0669405	0.0514627	0.310402	0.113134	-0.462779	0.0336056	-0.494151	-0.180685	0.232441	-0.055871	0.0697919
7.2002	0.0981169	-0.146816	0.0409639	-0.156291	-0.0912485	0.0412356	0.304668	0.115119	-0.448974	0.0146187	-0.492031	-0.18285	0.243772	-0.0597348	0.0731851
7.2998	0.105108	-0.150726	0.042671	-0.137131	-0.115882	0.034438	0.298559	0.1152	-0.43196	-0.0039028	-0.486553	-0.182687	0.254184	-0.0609129	0.077036
7.3999	0.112155	-0.151937	0.0429819	-0.117749	-0.140436	0.0312699	0.292106	0.113511	-0.411982	-0.0214805	-0.4776	-0.180078	0.263529	-0.059377	0.0812951
7.5	0.119134	-0.150491	0.0418585	-0.0984531	-0.164557	0.0318613	0.285282	0.110261	-0.389318	-0.0376675	-0.465136	-0.174936	0.271826	-0.0552025	0.085888
7.6001	0.125926	-0.146467	0.0393446	-0.0796305	-0.187855	0.0361911	0.278153	0.105735	-0.364367	-0.0520157	-0.449252	-0.16721	0.279096	-0.0485625	0.0907708
7.7002	0.132396	-0.140045	0.0355623	-0.0616319	-0.210005	0.0441544	0.270736	0.100252	-0.337571	-0.0641438	-0.430106	-0.156937	0.285391	-0.0397348	0.0958482
7.7998	0.138411	-0.131502	0.03071	-0.0447797	-0.23065	0.0555357	0.263103	0.094202	-0.309452	-0.0737256	-0.407871	-0.144149	0.290881	-0.0291256	0.10099
7.8999	0.143829	-0.121173	0.025028	-0.0293903	-0.249446	0.0700411	0.255312	0.0879615	-0.28062	-0.0805172	-0.382814	-0.128953	0.295618	-0.0171603	0.106045
8	0.148521	-0.10946	0.0187777	-0.0157075	-0.266099	0.0872703	0.247492	0.0819227	-0.25167	-0.0843884	-0.355285	-0.111457	0.299751	-0.00429972	0.110832
8.1001	0.152349	-0.0968027	0.0122316	-0.00394405	-0.28037	0.106771	0.239735	0.0764309	-0.22328	-0.0852803	-0.325729	-0.0917606	0.303396	0.00895112	0.115124
8.2002	0.155188	-0.083663	0.0056303	0.00578429	-0.292076	0.128063	0.232223	0.0718122	-0.196074	-0.0832196	-0.294592	-0.0699543	0.306656	0.0220933	0.118717
8.2998	0.156932	-0.0705118	-0.000799372	0.0133764	-0.301051	0.150597	0.225099	0.0683465	-0.1707	-0.0783361	-0.262414	-0.0461624	0.309603	0.0346747	0.121449
8.3999	0.15749	-0.0578179	-0.00686665	0.0188208	-0.307159	0.173834	0.218546	0.0662263	-0.147773	-0.0708875	-0.229802	-0.0204593	0.312308	0.0462604	0.123207
8.5	0.156801	-0.0459866	-0.0124361	0.0221848	-0.310344	0.197212	0.212725	0.0655949	-0.127806	-0.0611783	-0.197356	0.00704623	0.314781	0.0565194	0.123863
8.6001	0.154822	-0.0354218	-0.0174067	0.0235914	-0.310576	0.220259	0.207831	0.0664822	-0.111293	-0.0495924	-0.165664	0.0362606	0.316976	0.0651468	0.123356
8.7002	0.151537	-0.0264535	-0.021763	0.0232413	-0.30789	0.242485	0.204033	0.0688363	-0.0985828	-0.0365702	-0.135307	0.0671536	0.318833	0.0719566	0.121597
8.7998	0.14696	-0.019341	-0.0255396	0.0213177	-0.30236	0.263493	0.20146	0.072474	-0.0899685	-0.0226057	-0.106812	0.0996373	0.320226	0.0768552	0.118576
8.8999	0.141129	-0.0142536	-0.0288012	0.0180608	-0.294102	0.282958	0.200245	0.0771497	-0.0855695	-0.00819912	-0.0806963	0.133641	0.320964	0.079854	0.114319
9	0.134123	-0.0112667	-0.0316622	0.0137458	-0.283292	0.300574	0.200453	0.0825431	-0.0854181	0.00608576	-0.0574632	0.169054	0.32091	0.0810035	0.108879
9.1001	0.12605	-0.0104008	-0.0342238	0.00866358	-0.270121	0.316184	0.202139	0.088278	-0.0894552	0.0197221	-0.0375298	0.205706	0.319856	0.0804318	0.102383
9.2002	0.117047	-0.0115395	-0.036648	0.00301296	-0.254854	0.329617	0.205322	0.093939	-0.0974587	0.0322389	-0.0212833	0.243448	0.317611	0.0783667	0.0949403
9.2998	0.107271	-0.0145264	-0.0390932	-0.00297908	-0.237801	0.340821	0.209925	0.0990701	-0.109123	0.0431878	-0.00900607	0.282117	0.314024	0.0751266	0.0867273
9.3999	0.0969079	-0.0190825	-0.0417234	-0.00913324	-0.219304	0.34974	0.215899	0.10324	-0.124021	0.0521776	-0.000854077	0.321439	0.308955	0.071011	0.077942
9.5	0.0861595	-0.0249191	-0.0447027	-0.0152564	-0.199748	0.356404	0.223132	0.106022	-0.141637	0.058896	0.00307282	0.361166	0.302312	0.0663565	0.0687867
9.6001	0.0752323	-0.0316806	-0.0481226	-0.0211664	-0.179534	0.36087	0.231444	0.107027	-0.161339	0.0631043	0.0027635	0.400963	0.29405	0.0614436	0.0594732
9.7002	0.0643544	-0.0390182	-0.0520727	-0.0267731	-0.159042	0.363199	0.240635	0.105934	-0.182463	0.0646672	-0.00170194	0.440481	0.284111	0.0565575	0.0502092
9.7998	0.0537537	-0.0465695	-0.0565531	-0.0319202	-0.138692	0.363508	0.250506	0.102521	-0.204261	0.0635312	-0.0102243	0.479369	0.272543	0.0518945	0.0411798
9.8999	0.0436515	-0.053977	-0.0615561	-0.0365161	-0.1189	0.361871	0.260798	0.0966792	-0.226027	0.0596959	-0.0225343	0.517224	0.259394	0.0476665	0.0325567
10	0.0342639	-0.0609198	-0.0670416	-0.0404457	-0.100074	0.358404	0.27126	0.0884145	-0.247026	0.0532612	-0.0383981	0.553687	0.244777	0.0439865	0.0245172
10.1001	0.0257849	-0.0671588	-0.0729296	-0.0436511	-0.0826083	0.353186	0.281651	0.0778205	-0.266492	0.0443794	-0.0574471	0.588388	0.228828	0.04092	0.0171605
10.2002	0.0183982	-0.0724899	-0.0790846	-0.0460535	-0.066864	0.346357	0.291689	0.065077	-0.283723	0.033308	-0.0792885	0.621004	0.211677	0.0384505	0.010626
10.2998	0.0122703	-0.0767967	-0.0853674	-0.0475538	-0.0531328	0.337986	0.301123	0.0504991	-0.29806	0.0203312	-0.103512	0.651223	0.193569	0.0365837	0.0049516
10.3999	0.00751633	-0.0800825	-0.0916025	-0.0480698	-0.04168	0.328171	0.309685	0.0344476	-0.308943	0.00578993	-0.12965	0.678807	0.174697	0.0352587	0.00020612
10.5	0.00424709	-0.0824018	-0.0976278	-0.0474714	-0.0326782	0.317024	0.317208	0.0173825	-0.3159	-0.00993542	-0.157262	0.703539	0.155365	0.0344569	-0.00364672
10.6001	0.00251325	-0.0839029	-0.103262	-0.0456281	-0.026256	0.304696	0.32348	-0.000220108	-0.318568	-0.0264886	-0.185876	0.725309	0.135805	0.0341255	-0.00667559
10.7002	0.00233597	-0.0848071	-0.108353	-0.042503	-0.0224812	0.291285	0.328362	-0.017885	-0.316735	-0.043488	-0.215043	0.744056	0.116363	0.0342367	-0.00895297
10.7998	0.00370501	-0.0853392	-0.112744	-0.0380046	-0.0212852	0.277003	0.331708	-0.0351495	-0.310278	-0.0605886	-0.24431	0.759759	0.0973197	0.0347674	-0.0106448
10.8999	0.00658353	-0.0858098	-0.116312	-0.0320528	-0.0225515	0.262	0.333428	-0.0515556	-0.299232	-0.0774682	-0.273241	0.772485	0.0790024	0.0357235	-0.0119075
11	0.0108845	-0.0865499	-0.118983	-0.0245899	-0.0261068	0.246476	0.333413	-0.0666963	-0.283806	-0.0938764	-0.301491	0.782309	0.0618055	0.0371495	-0.012905
11.1001	0.0164936	-0.0878679	-0.120701	-0.0156417	-0.0317314	0.230632	0.331689	-0.0802467	-0.264349	-0.109554	-0.328665	0.78937	0.0460598	0.039149	-0.0138148
11.2002	0.0232686	-0.0900595	-0.121474	-0.00524004	-0.039188	0.214698	0.328244	-0.0919688	-0.241299	-0.124347	-0.354476	0.793813	0.0320767	0.0418865	-0.0147952
11.2998	0.0310448	-0.0933935	-0.121304	0.0065406	-0.0481934	0.198917	0.323123	-0.101762	-0.215225	-0.138127	-0.378617	0.7958	0.0202478	0.045572	-0.0160025
11.3999	0.0396431	-0.0980297	-0.120302	0.0195496	-0.0584166	0.183473	0.316371	-0.10955	-0.186766	-0.150829	-0.400886	0.795491	0.0108996	0.0504267	-0.0175761
11.5	0.0488651	-0.104093	-0.118563	0.0336062	-0.069547	0.168626	0.308091	-0.115342	-0.156626	-0.162467	-0.421136	0.793047	0.0043036	0.0566993	-0.0195712
11.6001	0.0585101	-0.111627	-0.116274	0.0485073	-0.0812732	0.154548	0.298381	-0.119228	-0.125608	-0.173111	-0.43927	0.788601	0.000695628	0.0646058	-0.0220336
11.7002	0.0683819	-0.120617	-0.113579	0.0640034	-0.0933189	0.141475	0.287417	-0.121375	-0.0944513	-0.18287	-0.455216	0.782291	0.000242591	0.0743567	-0.0249118
11.7998	0.0782787	-0.130935	-0.110689	0.0798429	-0.10548	0.129556	0.275348	-0.121992	-0.0639369	-0.191899	-0.468953	0.774205	0.00305103	0.0861274	-0.0281066
11.8999	0.0880218	-0.142375	-0.107794	0.0957548	-0.11753	0.118974	0.262357	-0.121334	-0.0347251	-0.200377	-0.480494	0.764382	0.00913327	0.100004	-0.0314807
12	0.097423	-0.154641	-0.105105	0.111477	-0.129326	0.109823	0.24862	-0.119657	-0.0074417	-0.208524	-0.489863	0.752896	0.0183989	0.116042	-0.0348357
12.1001	0.106343	-0.16743	-0.102789	0.12675	-0.140767	0.102222	0.234292	-0.117223	0.0173889	-0.216595	-0.497142	0.739807	0.0306512	0.13422	-0.037937
12.2002	0.114617	-0.180358	-0.101023	0.141311	-0.15175	0.0962088	0.219544	-0.11423	0.0394033	-0.224804	-0.502393	0.725158	0.0456315	0.15439	-0.0405406
12.2998	0.122141	-0.193054	-0.0999357	0.15495	-0.162244	0.0918506	0.204511	-0.110878	0.0583382	-0.233415	-0.50572	0.708984	0.0628951	0.176339	-0.0423735
12.3999	0.128818	-0.205102	-0.0996592	0.167447	-0.172175	0.0891383	0.189309	-0.107356	0.074105	-0.242692	-0.507271	0.691336	0.0820249	0.19972	-0.0431803
12.5	0.134572	-0.216164	-0.100205	0.178662	-0.181499	0.0880589	0.174051	-0.10382	0.0867477	-0.252926	-0.507214	0.672316	0.102461	0.224137	-0.0427226
12.6001	0.139359	-0.225854	-0.101607	0.188507	-0.190183	0.0885416	0.158819	-0.100387	0.0964529	-0.264358	-0.505669	0.65204	0.123547	0.249114	-0.0408324
12.7002	0.143146	-0.233863	-0.103872	0.196885	-0.19815	0.0905273	0.143643	-0.0970947	0.103565	-0.277186	-0.502832	0.630674	0.144641	0.274091	-0.0373858
12.7998	0.145914	-0.239919	-0.10694	0.203754	-0.205349	0.0938958	0.128553	-0.0940059	0.108515	-0.29161	-0.498886	0.608459	0.165099	0.298487	-0.0323657
12.8999	0.14766	-0.243805	-0.110739	0.209059	-0.211713	0.0985154	0.113525	-0.0911326	0.111808	-0.307773	-0.494052	0.585646	0.184266	0.321681	-0.0257815
13	0.148405	-0.245365	-0.115137	0.212816	-0.217138	0.104241	0.0985141	-0.0885005	0.113983	-0.325793	-0.48855	0.562518	0.201509	0.34301	-0.0177764
13.1001	0.148163	-0.24452	-0.119972	0.21505	-0.221512	0.110873	0.0835016	-0.0861112	0.115613	-0.345705	-0.482636	0.539432	0.216287	0.361845	-0.0084952
13.2002	0.146985	-0.241255	-0.125078	0.215806	-0.224702	0.118192	0.0684121	-0.083965	0.117274	-0.367528	-0.476534	0.516737	0.228098	0.377578	0.00177968
13.2998	0.144916	-0.235583	-0.130242	0.215134	-0.226581	0.125959	0.053245	-0.0820801	0.119506	-0.391195	-0.470496	0.494821	0.236568	0.389728	0.0127622
13.3999	0.142023	-0.227608	-0.135237	0.213121	-0.227047	0.133949	0.0379768	-0.0804814	0.122814	-0.416593	-0.464772	0.474086	0.241371	0.397881	0.024069
13.5	0.138372	-0.217424	-0.139862	0.20988	-0.225996	0.14187	0.0226247	-0.0792208	0.127557	-0.443528	-0.459621	0.454895	0.242406	0.401645	0.0353395
13.6001	0.134048	-0.205219	-0.143891	0.205524	-0.223387	0.149496	0.00728214	-0.0783688	0.134016	-0.471775	-0.455226	0.437599	0.239615	0.40086	0.0461408
13.7002	0.129123	-0.191183	-0.147135	0.200163	-0.219205	0.156563	-0.00796756	-0.0780045	0.142372	-0.500987	-0.451753	0.422498	0.233094	0.395451	0.0561334
13.7998	0.123707	-0.175545	-0.149431	0.193937	-0.213471	0.162832	-0.0229496	-0.0782191	0.152659	-0.530768	-0.449343	0.409858	0.223036	0.385495	0.0649721
13.8999	0.117873	-0.158563	-0.150633	0.18702	-0.206282	0.168089	-0.0374415	-0.0791172	0.164845	-0.560705	-0.448056	0.399852	0.209691	0.371187	0.0723592
14	0.111727	-0.140506	-0.150658	0.179594	-0.197813	0.172159	-0.0512182	-0.080812	0.178733	-0.590343	-0.447974	0.392586	0.193457	0.352864	0.0780641
14.1001	0.105351	-0.121612	-0.149466	0.171918	-0.188325	0.174893	-0.06394	-0.0833784	0.194077	-0.619208	-0.449019	0.388092	0.174851	0.330936	0.0819055
14.2002	0.0988276	-0.102155	-0.147057	0.164251	-0.178115	0.176216	-0.0753064	-0.0868975	0.210562	-0.646814	-0.451133	0.386342	0.154408	0.305988	0.0838128
14.2998	0.0922399	-0.0823931	-0.143482	0.156859	-0.167492	0.17606	-0.0849803	-0.0914356	0.227757	-0.672719	-0.454101	0.387193	0.132739	0.278647	0.0837709
14.3999	0.0856523	-0.0626076	-0.138846	0.15002	-0.156854	0.174458	-0.0926687	-0.0970357	0.245275	-0.696454	-0.457723	0.390446	0.110479	0.249627	0.0818178
14.5	0.0791432	-0.0430306	-0.133314	0.143941	-0.14656	0.171466	-0.0980911	-0.10369	0.262675	-0.717619	-0.46167	0.395821	0.0882278	0.219649	0.0780488
14.6001	0.0727409	-0.023919	-0.127091	0.138853	-0.136989	0.167216	-0.101019	-0.111372	0.279561	-0.73585	-0.465638	0.402967	0.0666165	0.189477	0.0726129
14.7002	0.066467	-0.00546925	-0.120398	0.13497	-0.128473	0.161851	-0.101288	-0.120011	0.295598	-0.750853	-0.469277	0.411472	0.0462324	0.159801	0.0656988
14.7998	0.0603188	0.0120821	-0.113457	0.132461	-0.121305	0.155599	-0.0988428	-0.12953	0.310417	-0.762405	-0.472247	0.420894	0.0276422	0.131311	0.0575391
14.8999	0.0542858	0.0285889	-0.106489	0.13144	-0.11576	0.148702	-0.0936832	-0.13983	0.32378	-0.770368	-0.47424	0.430747	0.0113082	0.10468	0.0483953
15	0.0483459	0.0438705	-0.0997335	0.131922	-0.111993	0.141431	-0.0858935	-0.150763	0.335473	-0.774676	-0.474899	0.440544	-0.00235019	0.0804726	0.0384961
15.1001	0.0424525	0.057819	-0.0933802	0.133877	-0.110083	0.134075	-0.0756852	-0.162207	0.345373	-0.775293	-0.473936	0.449812	-0.0129957	0.059168	0.0280935
15.2002	0.0365406	0.0703292	-0.0876333	0.13718	-0.109986	0.126874	-0.0633737	-0.173997	0.353397	-0.772263	-0.471136	0.458063	-0.0203462	0.041106	0.0174428
15.2998	0.0305522	0.0813727	-0.0825979	0.141657	-0.11158	0.120119	-0.0493259	-0.185987	0.359507	-0.765707	-0.466387	0.464849	-0.0242559	0.0265191	0.00675405
15.3999	0.024425	0.0909329	-0.0783197	0.147045	-0.114685	0.114027	-0.033985	-0.19802	0.363772	-0.755785	-0.45965	0.469792	-0.0246376	0.0154952	-0.0037707
15.5	0.0181044	0.0990372	-0.0748236	0.153022	-0.118979	0.108803	-0.017841	-0.209927	0.366211	-0.742696	-0.450965	0.472544	-0.0215448	0.00808631	-0.0140093
15.6001	0.0115308	0.105774	-0.0721075	0.159235	-0.124093	0.10461	-0.00141671	-0.221546	0.366911	-0.726685	-0.440417	0.472814	-0.0151179	0.00420731	-0.0238513
15.7002	0.00466715	0.111227	-0.0700953	0.165295	-0.129611	0.101532	0.0147934	-0.232696	0.365996	-0.708041	-0.42818	0.470415	-0.00552128	0.00369281	-0.033245
15.7998	-0.00249995	0.115534	-0.0686743	0.170791	-0.135099	0.0996267	0.0303003	-0.24324	0.363521	-0.687102	-0.414532	0.465249	0.0069475	0.00631978	-0.0421065
15.8999	-0.00995851	0.118857	-0.067734	0.175353	-0.140114	0.0988866	0.0447047	-0.253022	0.359647	-0.664198	-0.399755	0.457358	0.0219753	0.0117219	-0.0503672
16	-0.0177031	0.121382	-0.0671179	0.178591	-0.144178	0.099253	0.0576386	-0.261907	0.354399	-0.639718	-0.384215	0.446842	0.0391723	0.0195165	-0.0579985
16.1001	-0.0256908	0.123328	-0.066704	0.18014	-0.146854	0.100619	0.0688101	-0.269751	0.34785	-0.614067	-0.368233	0.433903	0.0581159	0.0292827	-0.0649813
16.2002	-0.0338545	0.124876	-0.0664141	0.17971	-0.147736	0.102812	0.078066	-0.27646	0.340011	-0.587646	-0.352153	0.418802	0.0782848	0.040548	-0.071287
16.2998	-0.0421172	0.126276	-0.0661299	0.177041	-0.146495	0.105674	0.0853103	-0.281897	0.330881	-0.56087	-0.33625	0.401881	0.0992285	0.0528795	-0.0769252
16.3999	-0.0503952	0.127706	-0.0658628	0.172	-0.142881	0.108987	0.0906396	-0.285947	0.320473	-0.53418	-0.320775	0.383584	0.120404	0.0658118	-0.0818919
16.5	-0.0585983	0.129413	-0.065592	0.16447	-0.136677	0.112542	0.0941912	-0.2885	0.308728	-0.508041	-0.305875	0.364367	0.141352	0.0789146	-0.0861567
16.6001	-0.0666413	0.131564	-0.0653955	0.154405	-0.12779	0.116118	0.0962036	-0.289445	0.295656	-0.482871	-0.291656	0.34469	0.161618	0.0917249	-0.0896681
16.7002	-0.0744251	0.134372	-0.0653059	0.141825	-0.116219	0.119544	0.0969718	-0.288735	0.281223	-0.459101	-0.278153	0.325061	0.180732	0.103906	-0.0923384
16.7998	-0.0818718	0.13794	-0.0654356	0.126842	-0.102037	0.122615	0.096909	-0.286306	0.265381	-0.437108	-0.265294	0.305951	0.19833	0.115062	-0.0940627
16.8999	-0.0889279	0.142389	-0.0658762	0.109625	-0.0854109	0.125198	0.0964628	-0.282167	0.248178	-0.417237	-0.252967	0.287819	0.214074	0.124932	-0.0947398
17	-0.0955522	0.147771	-0.0667879	0.0903796	-0.0665596	0.127187	0.0961063	-0.276319	0.22965	-0.3998	-0.240935	0.27108	0.227657	0.133281	-0.0942248
17.1001	-0.101739	0.154115	-0.0682184	0.0693711	-0.0458371	0.128507	0.0963124	-0.268823	0.209843	-0.38507	-0.228925	0.256094	0.238857	0.139936	-0.09243
17.2002	-0.107493	0.161424	-0.070225	0.0469148	-0.0236487	0.129116	0.0974965	-0.259775	0.18887	-0.373252	-0.216633	0.243091	0.247512	0.144734	-0.0892256
17.2998	-0.112851	0.169639	-0.0728037	0.0232988	-0.000401778	0.129036	0.100081	-0.249336	0.166827	-0.364511	-0.203779	0.232297	0.253454	0.14758	-0.0845431
17.3999	-0.117866	0.178705	-0.0758879	-0.00110864	0.0233992	0.128334	0.104363	-0.237703	0.143858	-0.358961	-0.190121	0.223845	0.25671	0.148454	-0.078308
17.5	-0.122612	0.188494	-0.0793402	-0.0259295	0.0472773	0.127062	0.110578	-0.225082	0.120127	-0.356705	-0.175421	0.217781	0.257268	0.147384	-0.070465
17.6001	-0.127172	0.198872	-0.0829737	-0.05077	0.0706892	0.125357	0.118856	-0.211739	0.0958321	-0.357801	-0.159522	0.214088	0.255294	0.144477	-0.0609816
17.7002	-0.13164	0.209667	-0.086508	-0.0752671	0.0931208	0.123293	0.129237	-0.197976	0.0711851	-0.362271	-0.142318	0.212674	0.250885	0.139904	-0.0498789
17.7998	-0.136113	0.220684	-0.0896589	-0.0990528	0.114084	0.121006	0.141604	-0.184115	0.0463979	-0.370072	-0.123794	0.213391	0.244296	0.133877	-0.0372084
17.8999	-0.140663	0.23169	-0.0920717	-0.121807	0.133096	0.118592	0.155787	-0.170515	0.0216831	-0.381128	-0.104026	0.216071	0.235757	0.126611	-0.0230654
18	-0.145385	0.242464	-0.0934221	-0.143188	0.149743	0.116168	0.171481	-0.157532	-0.00274167	-0.39537	-0.083145	0.220484	0.225566	0.118426	-0.00757396
18.1001	-0.150327	0.252711	-0.0933325	-0.162889	0.163663	0.113825	0.188302	-0.145492	-0.0266896	-0.41267	-0.0613882	0.226343	0.214066	0.109626	0.00914014
18.2002	-0.155512	0.262181	-0.0914728	-0.180639	0.174578	0.111645	0.205821	-0.134732	-0.04999	-0.432891	-0.0390726	0.233348	0.201672	0.100574	0.0268861
18.2998	-0.16095	0.270596	-0.0875723	-0.196271	0.1823	0.109675	0.223534	-0.125581	-0.0724827	-0.455832	-0.0165128	0.241162	0.188725	0.0916042	0.0455152
18.3999	-0.166603	0.27773	-0.0814611	-0.209641	0.186731	0.107961	0.240928	-0.118325	-0.0940522	-0.481299	0.00593289	0.249457	0.175606	0.0830732	0.0647985
18.5	-0.172416	0.283336	-0.0730173	-0.220683	0.18785	0.10654	0.257503	-0.113194	-0.114615	-0.509031	0.0279205	0.257881	0.162636	0.0753057	0.0845109
18.6001	-0.178307	0.287226	-0.0622179	-0.229387	0.185721	0.105418	0.27271	-0.110345	-0.134094	-0.538728	0.0490917	0.266027	0.150207	0.0686229	0.104469
18.7002	-0.184169	0.289195	-0.0492003	-0.235755	0.180511	0.104606	0.286155	-0.109874	-0.152452	-0.570007	0.0691891	0.273486	0.138596	0.0632733	0.12442
18.7998	-0.189874	0.289101	-0.0341742	-0.239878	0.172454	0.104097	0.297442	-0.111801	-0.169673	-0.602453	0.0879743	0.279834	0.128108	0.0594916	0.144253
18.8999	-0.195274	0.286849	-0.0174791	-0.241901	0.161863	0.103858	0.306247	-0.116059	-0.185734	-0.635592	0.105249	0.284632	0.118957	0.0574436	0.163727
19	-0.200218	0.282401	0.000503347	-0.242033	0.149148	0.103899	0.312385	-0.122525	-0.200616	-0.668881	0.120946	0.287474	0.111343	0.0572217	0.182682
19.1001	-0.204557	0.27576	0.0192945	-0.240432	0.134695	0.104189	0.315713	-0.130993	-0.214268	-0.70174	0.135037	0.287952	0.105371	0.0587805	0.20097
19.2002	-0.208132	0.266979	0.0383547	-0.237333	0.118949	0.104738	0.316236	-0.141168	-0.226705	-0.733601	0.147572	0.285646	0.101111	0.0620578	0.218418
19.2998	-0.210836	0.25617	0.0571135	-0.232988	0.102356	0.105522	0.314027	-0.152669	-0.237921	-0.763836	0.158642	0.280215	0.0985515	0.0668877	0.234905
19.3999	-0.212555	0.24344	0.0750101	-0.227608	0.0853563	0.106504	0.309203	-0.165111	-0.24789	-0.791835	0.168398	0.271328	0.0976845	0.0730643	0.25026
19.5	-0.213217	0.229008	0.0914782	-0.221456	0.0683895	0.1077	0.302011	-0.178073	-0.256581	-0.817032	0.177017	0.258734	0.0984214	0.0803115	0.264359
19.6001	-0.212791	0.213089	0.106018	-0.214764	0.0518673	0.109053	0.292675	-0.191083	-0.263937	-0.838836	0.184728	0.242248	0.100633	0.0882485	0.2771
19.7002	-0.211252	0.19597	0.118164	-0.207765	0.0361461	0.110545	0.281449	-0.20363	-0.26994	-0.85674	0.19168	0.221788	0.104167	0.0964582	0.288338
19.7998	-0.208636	0.177889	0.127552	-0.20064	0.021597	0.112097	0.268602	-0.215244	-0.274541	-0.870337	0.198048	0.197335	0.108847	0.104531	0.297974
19.8999	-0.205004	0.159104	0.133896	-0.193597	0.00850417	0.113678	0.254415	-0.225517	-0.277716	-0.879288	0.203927	0.169032	0.114447	0.112044	0.305893
20	-0.200457	0.139855	0.137035	-0.186811	-0.00287793	0.11521	0.239105	-0.234091	-0.279446	-0.883327	0.209383	0.137106	0.120789	0.118586	0.312023
20.1001	-0.195115	0.12036	0.136877	-0.180451	-0.0123296	0.11661	0.222923	-0.240643	-0.279716	-0.882368	0.214453	0.101904	0.127603	0.123765	0.316322
20.2002	-0.189124	0.100851	0.133474	-0.174656	-0.0197319	0.117803	0.206018	-0.244941	-0.278585	-0.876384	0.219055	0.063905	0.134659	0.127246	0.318726
20.2998	-0.182651	0.0814764	0.126943	-0.169557	-0.0249855	0.118676	0.188486	-0.246823	-0.276112	-0.865456	0.223125	0.0236786	0.141761	0.128736	0.319199
20.3999	-0.175874	0.0623748	0.117517	-0.165238	-0.0280638	0.119189	0.17044	-0.246173	-0.272398	-0.849755	0.226552	-0.0181117	0.148656	0.128016	0.317749
20.5	-0.168981	0.0436332	0.10549	-0.161782	-0.0289574	0.119271	0.151882	-0.242994	-0.267539	-0.829563	0.229142	-0.0607661	0.155165	0.124971	0.314423
20.6001	-0.162154	0.0252978	0.091255	-0.159233	-0.0277661	0.118862	0.132839	-0.237344	-0.261685	-0.805238	0.230717	-0.103465	0.16108	0.119591	0.309292
20.7002	-0.155558	0.00733629	0.075218	-0.157626	-0.0246093	0.117897	0.113334	-0.229395	-0.254979	-0.777231	0.23111	-0.145392	0.166274	0.111943	0.302437
20.7998	-0.149348	-0.0102514	0.0578268	-0.156985	-0.0196653	0.116375	0.0933873	-0.219335	-0.247633	-0.746022	0.230162	-0.185699	0.170556	0.102187	0.293995
20.8999	-0.143657	-0.0275276	0.0395391	-0.157283	-0.0131534	0.114307	0.073057	-0.207419	-0.23986	-0.712136	0.227778	-0.223573	0.173823	0.0905531	0.284115
21	-0.138596	-0.0445679	0.0208452	-0.158502	-0.00532281	0.111744	0.0524196	-0.193913	-0.231867	-0.676123	0.223867	-0.258301	0.175926	0.0773726	0.273007
21.1001	-0.134258	-0.0614403	0.00218563	-0.160563	0.00351219	0.108784	0.0315858	-0.179122	-0.223864	-0.638538	0.218438	-0.289204	0.176878	0.0630241	0.260819
21.2002	-0.130702	-0.0782155	-0.0160334	-0.163422	0.0130319	0.10552	0.010738	-0.163343	-0.216053	-0.599907	0.211513	-0.315699	0.176598	0.0479433	0.247772
21.2998	-0.127977	-0.094943	-0.0334532	-0.166972	0.0228883	0.10211	-0.00992031	-0.146903	-0.208667	-0.56077	0.203173	-0.337346	0.17507	0.0325381	0.234074
21.3999	-0.126092	-0.11163	-0.0497801	-0.171164	0.0327218	0.0987169	-0.0301686	-0.130089	-0.201869	-0.521625	0.193539	-0.35382	0.172347	0.0172131	0.220013
21.5	-0.125043	-0.128277	-0.0647661	-0.1759	0.0422004	0.0955451	-0.0496615	-0.113182	-0.195845	-0.482951	0.182799	-0.364914	0.168516	0.00237131	0.205803
21.6001	-0.124783	-0.14482	-0.0782644	-0.181118	0.0509877	0.0927662	-0.0681035	-0.0964067	-0.190786	-0.445205	0.171146	-0.370593	0.163679	-0.0116796	0.191677
21.7002	-0.125246	-0.161122	-0.0901796	-0.186778	0.058766	0.0905977	-0.0851461	-0.0799601	-0.186838	-0.408765	0.158784	-0.370963	0.15801	-0.024651	0.177796
21.7998	-0.126357	-0.177033	-0.100456	-0.192843	0.0652731	0.089196	-0.100456	-0.0640109	-0.184161	-0.373961	0.14591	-0.366264	0.151668	-0.0363368	0.164372
21.8999	-0.128013	-0.192348	-0.109122	-0.199327	0.0703316	0.0887763	-0.113747	-0.0486879	-0.182852	-0.341037	0.132693	-0.356885	0.144826	-0.0465997	0.151573
22	-0.130093	-0.206831	-0.116234	-0.206247	0.0738106	0.0894688	-0.124717	-0.0340763	-0.183009	-0.310233	0.119305	-0.343246	0.137738	-0.0553799	0.13953
22.1001	-0.13246	-0.220232	-0.121878	-0.213645	0.0757019	0.0913992	-0.133165	-0.0202534	-0.18476	-0.281672	0.105835	-0.325934	0.130579	-0.0627246	0.128338
22.2002	-0.134961	-0.232285	-0.126192	-0.221581	0.0760272	0.0946456	-0.138947	-0.00726575	-0.188212	-0.255447	0.0923635	-0.30556	0.123586	-0.0687475	0.118076
22.2998	-0.137453	-0.242693	-0.129286	-0.230077	0.0749059	0.0992825	-0.141983	0.00486967	-0.193525	-0.231614	0.0789145	-0.282808	0.116915	-0.0736813	0.10883
22.3999	-0.139802	-0.251172	-0.131315	-0.239168	0.0725571	0.105306	-0.142288	0.016181	-0.200822	-0.210156	0.0654772	-0.258384	0.11079	-0.0777606	0.100609
22.5	-0.141834	-0.257493	-0.132368	-0.24882	0.0692689	0.11268	-0.139959	0.0266933	-0.210167	-0.191017	0.0520186	-0.232964	0.105392	-0.0812289	0.0934373
22.6001	-0.143346	-0.261459	-0.132538	-0.258989	0.0654124	0.121328	-0.135133	0.0364545	-0.22166	-0.17408	0.0384494	-0.207238	0.100842	-0.084425	0.0872766
22.7002	-0.144165	-0.262931	-0.13192	-0.269612	0.0614157	0.131122	-0.128055	0.0455025	-0.235363	-0.15916	0.0247142	-0.181874	0.097311	-0.0875869	0.0820772
22.7998	-0.144156	-0.261804	-0.13053	-0.280548	0.0576898	0.141899	-0.119022	0.0539253	-0.251314	-0.146062	0.010775	-0.157466	0.0948341	-0.0910101	0.0778066
22.8999	-0.143172	-0.258079	-0.128365	-0.291597	0.0546916	0.153465	-0.108379	0.061741	-0.269547	-0.13453	-0.0033699	-0.134546	0.0934588	-0.0949463	0.0743924
23	-0.141116	-0.251779	-0.125405	-0.302484	0.0528539	0.165619	-0.0964846	0.0690231	-0.289997	-0.124288	-0.0177478	-0.113571	0.0931892	-0.099662	0.071787
23.1001	-0.137906	-0.243068	-0.121546	-0.312972	0.0525632	0.178116	-0.0837205	0.0757907	-0.312593	-0.115069	-0.0323031	-0.0949616	0.0940085	-0.105284	0.0698816
23.2002	-0.133501	-0.232091	-0.116764	-0.322741	0.054176	0.190708	-0.0704877	0.0820702	-0.337175	-0.106573	-0.0469309	-0.0790471	0.0958407	-0.111923	0.0685808
23.2998	-0.127904	-0.219136	-0.110975	-0.331515	0.0579089	0.20316	-0.0571514	0.0878713	-0.363497	-0.0985103	-0.0614653	-0.066108	0.0986261	-0.119545	0.0677987
23.3999	-0.121163	-0.204447	-0.104161	-0.338932	0.0639286	0.215222	-0.0440669	0.0931474	-0.3913	-0.0906154	-0.0756598	-0.0563446	0.102264	-0.128148	0.0674344
23.5	-0.113379	-0.18837	-0.0962774	-0.344725	0.0722799	0.226649	-0.0315202	0.0978546	-0.420222	-0.0826515	-0.08929	-0.0498733	0.106688	-0.137642	0.0674306
23.6001	-0.104686	-0.171235	-0.0873434	-0.348677	0.0829002	0.237221	-0.0197956	0.101952	-0.449858	-0.0744167	-0.102081	-0.0467801	0.111724	-0.14784	0.0677034
23.7002	-0.0952616	-0.153374	-0.0774328	-0.350574	0.0956119	0.246701	-0.0091549	0.105382	-0.479754	-0.0657642	-0.113789	-0.0470589	0.117342	-0.158528	0.0681154
23.7998	-0.0853235	-0.135129	-0.0666983	-0.350353	0.110079	0.254901	0.000185532	0.108085	-0.509392	-0.0566216	-0.124155	-0.050668	0.123363	-0.169474	0.0685254
23.8999	-0.075107	-0.116833	-0.0553362	-0.348016	0.125884	0.261664	0.00807638	0.110023	-0.538268	-0.0469986	-0.132985	-0.057613	0.129743	-0.180416	0.0688669
24	-0.0648664	-0.0987759	-0.0436022	-0.343654	0.142517	0.266837	0.0143612	0.111143	-0.56584	-0.0369328	-0.140052	-0.067749	0.136368	-0.191082	0.0690252
24.1001	-0.0548673	-0.0812226	-0.0318205	-0.337369	0.159358	0.27033	0.0189486	0.111403	-0.591533	-0.0265828	-0.145282	-0.0809407	0.143168	-0.201217	0.0689851
24.2002	-0.0453711	-0.0643845	-0.0204165	-0.329363	0.175797	0.272045	0.0217233	0.110776	-0.614861	-0.0161355	-0.148637	-0.0970067	0.150056	-0.210532	0.0686303
24.2998	-0.0366313	-0.048462	-0.00979061	-0.319869	0.191156	0.271951	0.0226046	0.10923	-0.635368	-0.00585221	-0.150156	-0.11572	0.156998	-0.218796	0.0679342
24.3999	-0.0288512	-0.0335746	-0.00037594	-0.309179	0.20478	0.27005	0.0215634	0.106761	-0.652682	0.00398247	-0.149948	-0.136842	0.163922	-0.225798	0.0668184
24.5	-0.0222155	-0.0198246	0.00739841	-0.297599	0.216048	0.266388	0.0185804	0.103399	-0.666481	0.0130431	-0.148188	-0.160019	0.170755	-0.231383	0.0653535
24.6001	-0.0168539	-0.00726661	0.0131052	-0.285372	0.224415	0.261057	0.0136158	0.0991949	-0.67656	0.021007	-0.145112	-0.184874	0.17752	-0.235432	0.0635053
24.7002	-0.0128329	0.00406874	0.0163706	-0.272805	0.229454	0.254154	0.00666493	0.094243	-0.682823	0.0275576	-0.141024	-0.21098	0.184176	-0.237905	0.0613557
24.7998	-0.0101825	0.0141719	0.0169085	-0.260099	0.2308	0.245842	-0.00231663	0.0886186	-0.685261	0.0324107	-0.136209	-0.237823	0.19071	-0.238771	0.0589677
24.8999	-0.00885573	0.0230531	0.0145357	-0.247445	0.228214	0.236313	-0.0133219	0.0824282	-0.684013	0.0353159	-0.13095	-0.264869	0.197118	-0.238118	0.0564386
25	-0.00875693	0.0307454	0.00918369	-0.234907	0.221608	0.225781	-0.0263566	0.0757557	-0.679305	0.0361101	-0.125581	-0.291487	0.203422	-0.236024	0.0538541
25.1001	-0.00972394	0.0372857	0.00081806	-0.222525	0.211037	0.214489	-0.0413787	0.0687446	-0.671437	0.0347281	-0.120369	-0.316987	0.209623	-0.232644	0.0513879
25.2002	-0.0115639	0.0426987	-0.0103876	-0.210289	0.196688	0.202692	-0.0583297	0.0614948	-0.660834	0.0311621	-0.11553	-0.340665	0.215728	-0.22806	0.0491773
25.2998	-0.0140476	0.0470322	-0.0241777	-0.198077	0.178843	0.190667	-0.0771246	0.0541376	-0.647991	0.0255399	-0.111266	-0.361816	0.221689	-0.222421	0.0474035
25.3999	-0.0169113	0.0503077	-0.0401613	-0.185822	0.157919	0.17866	-0.097638	0.0467751	-0.633407	0.0181131	-0.107693	-0.379732	0.22751	-0.215877	0.0461408
25.5	-0.0198688	0.0525278	-0.0577948	-0.173352	0.134408	0.166955	-0.119721	0.0395366	-0.617724	0.009197	-0.10492	-0.393717	0.23312	-0.208528	0.0455228
25.6001	-0.0226306	0.0537466	-0.0764772	-0.160551	0.108847	0.155795	-0.143199	0.0325655	-0.601547	-0.000817741	-0.103027	-0.403122	0.238511	-0.200519	0.0455953
25.7002	-0.0249138	0.0539811	-0.0955336	-0.147254	0.0817862	0.145419	-0.167817	0.0259647	-0.585539	-0.0114352	-0.102016	-0.407393	0.243603	-0.191926	0.0464479
25.7998	-0.0264462	0.0532754	-0.114245	-0.133415	0.0537865	0.135997	-0.193293	0.0198482	-0.570249	-0.0221652	-0.101906	-0.406099	0.248358	-0.182829	0.048031
25.8999	-0.0269856	0.0516413	-0.131884	-0.11896	0.0253758	0.127689	-0.219344	0.0142848	-0.556237	-0.0325007	-0.102678	-0.398929	0.252631	-0.173265	0.0503122
26	-0.026302	0.0491465	-0.147722	-0.103916	-0.00294265	0.12058	-0.245619	0.0093943	-0.543964	-0.0418956	-0.104334	-0.385717	0.256338	-0.163329	0.0531637
26.1001	-0.0242241	0.0458716	-0.161093	-0.0883739	-0.0307373	0.114717	-0.271811	0.00522852	-0.533854	-0.0498695	-0.106868	-0.366461	0.259366	-0.153021	0.0564691
26.2002	-0.0206048	0.0419042	-0.171437	-0.0724943	-0.0576441	0.110075	-0.297608	0.00183964	-0.526204	-0.0559894	-0.110314	-0.341351	0.261589	-0.142412	0.0600511
26.2998	-0.0153653	0.0373609	-0.178267	-0.0564908	-0.0833827	0.106605	-0.322674	-0.000736339	-0.521161	-0.0599064	-0.114734	-0.310726	0.262901	-0.131539	0.0637075
26.3999	-0.0084607	0.0323757	-0.181282	-0.0406132	-0.107785	0.104183	-0.34669	-0.00249838	-0.518768	-0.0613136	-0.120162	-0.275083	0.263179	-0.120461	0.067278
26.5	0.000125053	0.0271056	-0.18029	-0.0251623	-0.130788	0.102693	-0.369378	-0.0034593	-0.518912	-0.0600616	-0.126676	-0.235054	0.262348	-0.109244	0.0705987
26.6001	0.0103378	0.0217555	-0.175293	-0.0104691	-0.152379	0.101931	-0.390438	-0.00367735	-0.521384	-0.0561051	-0.134384	-0.191426	0.260345	-0.0979638	0.0734559
26.7002	0.0221079	0.0165369	-0.166456	0.0030777	-0.172597	0.101717	-0.409653	-0.00322386	-0.525836	-0.0495392	-0.143401	-0.145032	0.257161	-0.0867137	0.0757257
26.7998	0.0352976	0.0116865	-0.154099	0.0151444	-0.19154	0.10187	-0.426879	-0.00223547	-0.531811	-0.0405377	-0.153838	-0.096784	0.252818	-0.0756048	0.0772859
26.8999	0.0497538	0.00746422	-0.138647	0.025445	-0.209333	0.102181	-0.441967	-0.000827524	-0.538783	-0.0294365	-0.165725	-0.0476224	0.247405	-0.0648221	0.0781175
27	0.065285	0.00411298	-0.120726	0.0337643	-0.22613	0.102478	-0.454817	0.000856574	-0.546116	-0.0166508	-0.179126	0.00155629	0.24104	-0.0545136	0.078209
27.1001	0.0816897	0.00187754	-0.101017	0.0399469	-0.242026	0.102559	-0.465405	0.00271134	-0.553115	-0.00265015	-0.194017	0.0498957	0.233879	-0.0448466	0.0776178
27.2002	0.0987497	0.000994404	-0.0802862	0.0439245	-0.257111	0.10229	-0.473702	0.00458246	-0.559061	0.0120372	-0.210354	0.0966272	0.226094	-0.0359769	0.0764753
27.2998	0.116229	0.00163143	-0.0593111	0.0457011	-0.271403	0.101569	-0.479773	0.00633237	-0.563201	0.0268275	-0.228005	0.141062	0.217924	-0.0279903	0.0749475
27.3999	0.133875	0.00398566	-0.0388777	0.0453911	-0.284867	0.100329	-0.483649	0.00785955	-0.564898	0.0411483	-0.246836	0.182577	0.209622	-0.0209689	0.0732461
27.5	0.151449	0.00812458	-0.0197031	0.0432105	-0.297408	0.0985269	-0.485434	0.00910063	-0.563541	0.0543669	-0.266644	0.220711	0.201443	-0.0149919	0.0715963
27.6001	0.168702	0.0141289	-0.00247021	0.0394195	-0.308886	0.09616	-0.485231	0.00999838	-0.558627	0.0658957	-0.28723	0.255075	0.193643	-0.0100056	0.0702344
27.7002	0.1854	0.0219948	0.0122812	0.0343678	-0.319091	0.0932514	-0.483166	0.0105415	-0.549781	0.0752157	-0.308288	0.285468	0.186468	-0.00597867	0.0693857
27.7998	0.201305	0.0316955	0.0241316	0.0284482	-0.32782	0.0898584	-0.479384	0.0107565	-0.536745	0.0818636	-0.32954	0.311789	0.180125	-0.00285007	0.0692998
27.8999	0.216203	0.0431039	0.0327375	0.0221033	-0.334826	0.0860036	-0.474051	0.0107111	-0.519417	0.085467	-0.350654	0.334002	0.174755	-0.000534001	0.0701257
28	0.229913	0.0560643	0.0378759	0.015738	-0.339842	0.0817694	-0.46734	0.0105178	-0.497851	0.0856966	-0.371309	0.352182	0.170482	0.00111325	0.0720311
28.1001	0.242247	0.0703446	0.0395143	0.00976885	-0.342633	0.07719	-0.459474	0.0103107	-0.47225	0.0823442	-0.391171	0.366477	0.167412	0.0022734	0.0750772
28.2002	0.253053	0.0856949	0.0376814	0.00457599	-0.342998	0.0723131	-0.450663	0.0102259	-0.442952	0.0752706	-0.409951	0.377082	0.165555	0.00317994	0.0793153
28.2998	0.262184	0.101778	0.032583	0.000502748	-0.340785	0.0671729	-0.441143	0.0104118	-0.410442	0.0643842	-0.427377	0.384255	0.164821	0.00404064	0.0847017
28.3999	0.269541	0.118239	0.0244234	-0.00219339	-0.335932	0.0617598	-0.43115	0.0110096	-0.375323	0.049719	-0.44316	0.38831	0.165126	0.00505971	0.0910989
28.5	0.275044	0.13473	0.0135096	-0.00329637	-0.32844	0.0561066	-0.42098	0.0121572	-0.338251	0.031392	-0.457075	0.389515	0.166354	0.00643993	0.0983659
28.6001	0.278634	0.150841	0.000169561	-0.002668	-0.318412	0.0501806	-0.410881	0.0139319	-0.299985	0.00956125	-0.468895	0.388193	0.16833	0.00833442	0.106281
28.7002	0.280272	0.166191	-0.0152571	-0.00023718	-0.306061	0.0439723	-0.40114	0.0164148	-0.261242	-0.0154987	-0.478445	0.384644	0.170873	0.0108813	0.114674
28.7998	0.279951	0.180401	-0.032408	0.00398654	-0.291661	0.0374417	-0.392014	0.0196324	-0.222755	-0.0434616	-0.485537	0.379162	0.173754	0.0141719	0.123272
28.8999	0.277684	0.193099	-0.0509684	0.00995168	-0.275594	0.0305637	-0.383743	0.0235785	-0.185196	-0.0739616	-0.490016	0.372061	0.176776	0.018239	0.131832
29	0.273524	0.203953	-0.0705931	0.0175252	-0.258299	0.0233159	-0.376529	0.0281937	-0.14921	-0.106582	-0.491801	0.363676	0.179777	0.0231211	0.140091
29.1001	0.267521	0.212618	-0.0909845	0.0265173	-0.240249	0.0157058	-0.370533	0.0333773	-0.115336	-0.140893	-0.490747	0.354286	0.182557	0.028775	0.147827
29.2002	0.259772	0.218794	-0.11186	0.036711	-0.221972	0.00775226	-0.365841	0.0389954	-0.0840064	-0.176405	-0.486782	0.344207	0.185001	0.0350983	0.154846
29.2998	0.250369	0.222262	-0.132925	0.0478661	-0.203969	-0.000470187	-0.362522	0.0448828	-0.0555423	-0.21265	-0.479834	0.333733	0.186927	0.0419939	0.160942
29.3999	0.239434	0.222797	-0.153902	0.0597097	-0.186709	-0.0088778	-0.360546	0.0508417	-0.0301357	-0.249095	-0.46986	0.323181	0.188278	0.0493244	0.165962
29.5	0.227108	0.220298	-0.17453	0.0719429	-0.170631	-0.017331	-0.359846	0.05665	-0.00785718	-0.285273	-0.456921	0.312868	0.188965	0.0569474	0.169754
29.6001	0.213538	0.214673	-0.194531	0.0842804	-0.156109	-0.025605	-0.360305	0.0620839	0.0113581	-0.320699	-0.441069	0.303048	0.188973	0.0646288	0.172222
29.7002	0.198888	0.20592	-0.213627	0.0964464	-0.143438	-0.0335413	-0.361749	0.0669233	0.0276638	-0.354918	-0.422393	0.294053	0.188287	0.0721538	0.173256
29.7998	0.183327	0.194098	-0.231556	0.108162	-0.132858	-0.0408521	-0.363975	0.0709158	0.0413021	-0.387533	-0.401063	0.286177	0.186941	0.0792325	0.172768
29.8999	0.167033	0.179336	-0.247978	0.119218	-0.124507	-0.0472951	-0.366682	0.0738601	0.0525867	-0.41813	-0.377281	0.279658	0.18489	0.0856131	0.170735
30	0.150205	0.16183	-0.26264	0.129366	-0.118447	-0.0525936	-0.369638	0.075579	0.0619162	-0.446385	-0.351389	0.274772	0.182128	0.091054	0.167149
30.1001	0.133045	0.14187	-0.275286	0.138429	-0.11466	-0.0564806	-0.372569	0.0759356	0.0697504	-0.471994	-0.323706	0.271776	0.178676	0.0953194	0.162003
30.2002	0.115756	0.119779	-0.285652	0.146267	-0.113002	-0.0587388	-0.375221	0.0748212	0.0765651	-0.494729	-0.294686	0.27086	0.174504	0.0981714	0.155266
30.2998	0.0985419	0.0959353	-0.293507	0.152797	-0.113316	-0.0591945	-0.377361	0.0721503	0.0828715	-0.514385	-0.264857	0.272208	0.169535	0.0993678	0.14695
30.3999	0.081618	0.0707779	-0.298676	0.157992	-0.115367	-0.0576801	-0.378772	0.067863	0.0891264	-0.530859	-0.234753	0.275974	0.163728	0.0986626	0.137131
30.5	0.0651911	0.0447579	-0.30101	0.161878	-0.118884	-0.0541094	-0.3793	0.0619615	0.0957799	-0.544068	-0.204955	0.282234	0.156983	0.0958467	0.125893
30.6001	0.0494685	0.0183849	-0.300451	0.164528	-0.123615	-0.0484788	-0.378823	0.0544908	0.103252	-0.553993	-0.176006	0.291066	0.149218	0.0907584	0.113365
30.7002	0.0346365	-0.00786785	-0.296993	0.166072	-0.129254	-0.040853	-0.377279	0.0455339	0.111905	-0.56063	-0.148536	0.302472	0.14034	0.0832363	0.0996782
30.7998	0.0208853	-0.0334931	-0.290709	0.166642	-0.13549	-0.0314173	-0.374675	0.0352279	0.122062	-0.56407	-0.12315	0.316428	0.130268	0.0731775	0.0850145
30.8999	0.00836772	-0.0580306	-0.281761	0.166404	-0.14207	-0.0203775	-0.371019	0.0237312	0.133971	-0.564404	-0.100411	0.332857	0.118945	0.0605113	0.0695897
31	-0.00277005	-0.0810485	-0.270333	0.165581	-0.148738	-0.0080712	-0.36637	0.0112499	0.14776	-0.561786	-0.0808186	0.351623	0.106349	0.0452633	0.0536825
31.1001	-0.0124163	-0.102188	-0.256724	0.164381	-0.155321	0.00517357	-0.360831	-0.00200057	0.163509	-0.55638	-0.0648144	0.37256	0.0924845	0.0274453	0.0376474
31.2002	-0.0205001	-0.12112	-0.241245	0.163041	-0.161722	0.0189314	-0.354495	-0.0157621	0.181185	-0.548361	-0.0528099	0.39549	0.0773997	0.00716312	0.0218126
31.2998	-0.0269862	-0.137601	-0.224291	0.161748	-0.16784	0.0328037	-0.347499	-0.0297559	0.200644	-0.53795	-0.0450721	0.42014	0.0612205	-0.0153793	0.00654805
31.3999	-0.0318808	-0.151465	-0.206242	0.160658	-0.173643	0.0463344	-0.339984	-0.0437274	0.22169	-0.525408	-0.0418315	0.446245	0.044096	-0.0399073	-0.00778376
31.5	-0.0352164	-0.162593	-0.187529	0.159874	-0.179146	0.0591233	-0.332082	-0.0573965	0.244032	-0.511015	-0.0431498	0.473505	0.0263363	-0.0660597	-0.0208644
31.6001	-0.0370734	-0.170985	-0.168568	0.159506	-0.184421	0.0708021	-0.323937	-0.0705006	0.267296	-0.495046	-0.0490076	0.501561	0.00819701	-0.0934048	-0.0323504
31.7002	-0.0375701	-0.176683	-0.149771	0.159568	-0.189596	0.0810047	-0.315656	-0.0827706	0.291096	-0.477852	-0.0593134	0.530057	-0.0099158	-0.121463	-0.041912
31.7998	-0.0368522	-0.179803	-0.131506	0.160067	-0.194826	0.0894792	-0.307349	-0.0940087	0.314965	-0.459772	-0.0738344	0.558554	-0.0275836	-0.149661	-0.0492819
31.8999	-0.0351043	-0.180489	-0.114174	0.160949	-0.200282	0.0960328	-0.299148	-0.104013	0.338497	-0.441177	-0.0922842	0.586657	-0.0443452	-0.177451	-0.0542773
32	-0.0325195	-0.178946	-0.0980417	0.162152	-0.206147	0.100557	-0.291148	-0.112641	0.361235	-0.42248	-0.114274	0.613931	-0.0597596	-0.204263	-0.0567778
32.1001	-0.0292945	-0.175387	-0.0834085	0.163545	-0.212554	0.103006	-0.283419	-0.11978	0.38276	-0.404089	-0.139349	0.639943	-0.0733617	-0.22958	-0.0567645
32.2002	-0.0256309	-0.170056	-0.0704691	0.165009	-0.219684	0.103464	-0.27605	-0.125374	0.402715	-0.386445	-0.166973	0.664246	-0.084677	-0.252911	-0.0542754
32.2998	-0.0217487	-0.163178	-0.059395	0.16641	-0.227628	0.102024	-0.269154	-0.129422	0.420786	-0.369986	-0.196591	0.686373	-0.0933277	-0.273859	-0.0493983
32.3999	-0.0178257	-0.155008	-0.0503351	0.167626	-0.236446	0.098881	-0.262822	-0.13197	0.436709	-0.355133	-0.227579	0.705916	-0.0989418	-0.292087	-0.0423525
32.5	-0.0140381	-0.145743	-0.0433676	0.168552	-0.246193	0.0942596	-0.257132	-0.133105	0.450311	-0.342297	-0.259282	0.722433	-0.101297	-0.307396	-0.0333975
32.6001	-0.0105091	-0.135588	-0.0384771	0.169123	-0.256872	0.0884671	-0.252186	-0.132976	0.461533	-0.331854	-0.291015	0.735631	-0.100203	-0.319675	-0.0228728
32.7002	-0.00734488	-0.124674	-0.0356409	0.169311	-0.268446	0.0817858	-0.248074	-0.131751	0.470381	-0.324132	-0.322116	0.745192	-0.0956383	-0.328969	-0.0111521
32.7998	-0.00461355	-0.113165	-0.0347559	0.169091	-0.280854	0.0745915	-0.244895	-0.129638	0.476946	-0.319378	-0.351967	0.750931	-0.0876076	-0.335444	0.00138486
32.8999	-0.00236249	-0.101104	-0.0357077	0.168477	-0.293952	0.0671738	-0.242758	-0.126854	0.481404	-0.317772	-0.379926	0.752737	-0.0762474	-0.339349	0.0143415
33	-0.000591321	-0.0886094	-0.0383608	0.167474	-0.307623	0.0598707	-0.241751	-0.123654	0.483817	-0.319454	-0.405487	0.75062	-0.0617677	-0.341053	0.0272962
33.1001	0.000699958	-0.0757062	-0.0424921	0.166126	-0.321692	0.0529471	-0.241988	-0.120296	0.484329	-0.324486	-0.428122	0.744695	-0.0445254	-0.34102	0.039858
33.2002	0.00157077	-0.0624406	-0.0479319	0.164498	-0.335986	0.0466854	-0.243535	-0.117014	0.483103	-0.332821	-0.44748	0.735171	-0.0248506	-0.339728	0.0516664
33.2998	0.00204495	-0.0488241	-0.054394	0.162708	-0.350381	0.0412782	-0.246426	-0.114038	0.480313	-0.344354	-0.463279	0.72243	-0.0032221	-0.337643	0.0624124
33.3999	0.00219716	-0.0348903	-0.0616591	0.160851	-0.364731	0.0369027	-0.250693	-0.111568	0.476068	-0.358893	-0.475322	0.706921	0.0198851	-0.335203	0.0718595
33.5	0.00207968	-0.0206615	-0.069462	0.159021	-0.378914	0.0336432	-0.256302	-0.109808	0.470438	-0.376139	-0.483575	0.689186	0.0439441	-0.332757	0.0797941
33.6001	0.00174437	-0.00617143	-0.0775835	0.157311	-0.392783	0.0315624	-0.263203	-0.108902	0.463484	-0.395751	-0.488121	0.669841	0.068432	-0.330643	0.0861284
33.7002	0.00122817	0.00852085	-0.0857698	0.155798	-0.406208	0.0306337	-0.271289	-0.108968	0.455222	-0.417349	-0.48917	0.649531	0.092899	-0.329048	0.0907708
33.7998	0.000536951	0.0233104	-0.0938017	0.154602	-0.419087	0.0307845	-0.280381	-0.110061	0.445621	-0.44053	-0.487031	0.628912	0.116848	-0.328063	0.0937272
33.8999	-0.00033089	0.0381158	-0.101452	0.153739	-0.431302	0.0319442	-0.290272	-0.112238	0.434624	-0.464826	-0.482085	0.608658	0.139903	-0.327719	0.0950128
34	-0.00138946	0.0528081	-0.108576	0.153254	-0.442706	0.0339489	-0.300667	-0.115473	0.422137	-0.489762	-0.474811	0.589361	0.16166	-0.327894	0.0947076
34.1001	-0.00268074	0.0672181	-0.115065	0.153143	-0.453189	0.0366136	-0.31123	-0.119717	0.40813	-0.514873	-0.465732	0.57155	0.181853	-0.328439	0.092949
34.2002	-0.0042559	0.0811627	-0.120829	0.153405	-0.462595	0.0397132	-0.32156	-0.124892	0.392505	-0.539706	-0.455398	0.555617	0.200242	-0.329085	0.0898477
34.2998	-0.00619032	0.0944454	-0.125807	0.154006	-0.470767	0.0429902	-0.331259	-0.130914	0.375244	-0.563833	-0.444353	0.541842	0.21666	-0.329559	0.0855638
34.3999	-0.00855047	0.106882	-0.130005	0.154923	-0.477482	0.0462155	-0.339892	-0.1377	0.356379	-0.586853	-0.433147	0.530396	0.231001	-0.32956	0.0802423
34.5	-0.0114172	0.118257	-0.13353	0.156082	-0.482509	0.0491262	-0.34701	-0.145126	0.335969	-0.60839	-0.422278	0.521268	0.243173	-0.328802	0.0740625
34.6001	-0.0148436	0.128359	-0.136465	0.157391	-0.485654	0.0514857	-0.352226	-0.15309	0.314184	-0.628119	-0.412146	0.514337	0.253142	-0.32706	0.0672151
34.7002	-0.0188682	0.137018	-0.139004	0.158781	-0.486682	0.0531148	-0.355124	-0.161455	0.291228	-0.645761	-0.40305	0.509333	0.260935	-0.324157	0.0598642
34.7998	-0.0235053	0.144069	-0.141342	0.160101	-0.485385	0.0537977	-0.355383	-0.17013	0.267337	-0.661093	-0.395179	0.50589	0.26652	-0.319994	0.0522043
34.8999	-0.0287719	0.149388	-0.143746	0.161279	-0.481578	0.053441	-0.352755	-0.179063	0.242854	-0.673912	-0.388647	0.503515	0.26998	-0.314531	0.0444394
35	-0.0346186	0.152895	-0.146448	0.162143	-0.475088	0.0519668	-0.347048	-0.188185	0.218136	-0.684104	-0.383434	0.501667	0.271353	-0.307866	0.0367891
35.1001	-0.0409976	0.154537	-0.149683	0.162576	-0.465823	0.0493386	-0.338161	-0.197488	0.1936	-0.691595	-0.379418	0.499778	0.270743	-0.300157	0.0294591
35.2002	-0.0478191	0.154354	-0.153671	0.162478	-0.45373	0.0455889	-0.326113	-0.206903	0.169684	-0.696352	-0.376404	0.497266	0.268173	-0.291684	0.02273
35.2998	-0.0549579	0.152401	-0.158554	0.161771	-0.43888	0.0407959	-0.310976	-0.216421	0.14686	-0.698365	-0.374106	0.493653	0.263734	-0.282763	0.0167753
35.3999	-0.0622833	0.14877	-0.164484	0.160355	-0.421379	0.0350528	-0.292971	-0.226006	0.125589	-0.697701	-0.372178	0.488512	0.257467	-0.273785	0.0118123
35.5	-0.0696262	0.143614	-0.171515	0.158178	-0.401412	0.0285222	-0.272371	-0.235648	0.106276	-0.694431	-0.37025	0.481496	0.249491	-0.265088	0.00802625
35.6001	-0.0768215	0.137156	-0.179648	0.1552	-0.379229	0.0214117	-0.249553	-0.245353	0.0893125	-0.688655	-0.367877	0.472388	0.23989	-0.257102	0.00559057
35.7002	-0.0836956	0.129614	-0.188811	0.15138	-0.355125	0.0139198	-0.224953	-0.255083	0.0750137	-0.68055	-0.364651	0.46102	0.22881	-0.250225	0.00466741
35.7998	-0.0900936	0.121237	-0.198836	0.146712	-0.329489	0.00632105	-0.199064	-0.264816	0.0636293	-0.670307	-0.360199	0.44735	0.216432	-0.244813	0.00537885
35.8999	-0.0958485	0.112275	-0.209473	0.141141	-0.302726	-0.00117104	-0.172411	-0.274474	0.055348	-0.658172	-0.354164	0.431517	0.202901	-0.241124	0.00773061
36	-0.100833	0.102998	-0.220396	0.134726	-0.275319	-0.00831583	-0.1455	-0.283999	0.0502406	-0.644409	-0.346274	0.413717	0.188445	-0.239402	0.011696
36.1001	-0.10493	0.0936595	-0.231291	0.127468	-0.24775	-0.0148846	-0.118854	-0.293329	0.04833	-0.629243	-0.336286	0.394233	0.173273	-0.239787	0.0171911
36.2002	-0.108051	0.0844851	-0.241783	0.119412	-0.220516	-0.0207152	-0.092924	-0.302361	0.0495131	-0.613003	-0.324041	0.373433	0.157718	-0.242365	0.0240556
36.2998	-0.110144	0.0757113	-0.251478	0.110572	-0.194086	-0.0256418	-0.0681436	-0.310972	0.0535972	-0.595983	-0.309457	0.351713	0.142056	-0.247034	0.0320531
36.3999	-0.11118	0.0674721	-0.259976	0.100955	-0.16892	-0.0295576	-0.0448776	-0.319042	0.0603154	-0.57854	-0.292541	0.329477	0.126596	-0.253669	0.0409147
36.5	-0.111164	0.0599228	-0.266922	0.090557	-0.145457	-0.0323708	-0.0234255	-0.326449	0.0693377	-0.561021	-0.273315	0.307163	0.111646	-0.262039	0.0502912
36.6001	-0.110129	0.0531269	-0.271986	0.0793961	-0.12405	-0.0340377	-0.0040486	-0.333068	0.0802673	-0.543779	-0.251967	0.285134	0.0975221	-0.271852	0.059847
36.7002	-0.108138	0.0471244	-0.274897	0.0674893	-0.104981	-0.0345735	0.0130484	-0.338789	0.0926351	-0.527148	-0.228644	0.263749	0.0845662	-0.282777	0.0691339
36.7998	-0.105288	0.0418964	-0.275431	0.0548712	-0.0885084	-0.0339916	0.0277638	-0.343494	0.106014	-0.511441	-0.203635	0.243273	0.0730285	-0.294411	0.0778238
36.8999	-0.101686	0.0373956	-0.273489	0.0415187	-0.0747592	-0.0324162	0.0400339	-0.347091	0.119953	-0.496946	-0.177169	0.223898	0.0632108	-0.306322	0.0855523
37	-0.0974595	0.0335141	-0.26899	0.0274362	-0.0638281	-0.0299289	0.0498149	-0.349487	0.134058	-0.483935	-0.149598	0.205732	0.0552864	-0.31812	0.0920259
37.1001	-0.0927457	0.0301724	-0.26195	0.0126208	-0.0557084	-0.0266691	0.0572251	-0.350625	0.147933	-0.472603	-0.121275	0.188825	0.0494718	-0.329352	0.0969468
37.2002	-0.0876898	0.0272217	-0.252484	-0.00292899	-0.0502837	-0.0227589	0.0622868	-0.350442	0.16127	-0.463089	-0.0925542	0.173154	0.0458567	-0.339618	0.100109
37.2998	-0.0824461	0.0245285	-0.240746	-0.019154	-0.0473844	-0.0183775	0.0651594	-0.348883	0.173758	-0.455481	-0.0637516	0.158604	0.0445283	-0.348544	0.101372
37.3999	-0.0771566	0.0219618	-0.226959	-0.0360274	-0.0467501	-0.0136893	0.0659301	-0.345917	0.185214	-0.449797	-0.0352044	0.145058	0.0454123	-0.355835	0.10067
37.5	-0.0719785	0.0193658	-0.211392	-0.0535298	-0.0480881	-0.00880826	0.0647572	-0.341511	0.195489	-0.445983	-0.00725822	0.132329	0.0484667	-0.361249	0.0980035
37.6001	-0.0670442	0.0166421	-0.194302	-0.0716545	-0.05105	-0.00390433	0.0618048	-0.335634	0.204517	-0.443934	0.0197533	0.120214	0.0535257	-0.364642	0.093464
37.7002	-0.0624659	0.0136609	-0.175997	-0.0903857	-0.0552508	0.000921394	0.0572591	-0.328285	0.212302	-0.443462	0.0455022	0.108491	0.060382	-0.365925	0.0871774
37.7998	-0.0583544	0.0103592	-0.15678	-0.10967	-0.0602832	0.00554685	0.0512988	-0.319448	0.218884	-0.444354	0.069729	0.0969355	0.0687438	-0.365072	0.0793382
37.8999	-0.0547797	0.00667862	-0.13699	-0.129488	-0.0657685	0.00991657	0.0440892	-0.309152	0.224376	-0.446385	0.0921308	0.0853614	0.0782938	-0.362119	0.07012
38	-0.0518175	0.00260831	-0.116883	-0.1498	-0.0713685	0.0139813	0.0358877	-0.297431	0.228861	-0.449257	0.112442	0.0735717	0.0887111	-0.357145	0.0597783
38.1001	-0.04951	-0.0018511	-0.0967218	-0.170517	-0.0767957	0.0177179	0.0269024	-0.284326	0.232466	-0.452701	0.13038	0.061429	0.099626	-0.350299	0.0485784
38.2002	-0.0478557	-0.00667291	-0.0767328	-0.191583	-0.081851	0.0211265	0.0173766	-0.269905	0.235337	-0.456448	0.145705	0.0488325	0.110585	-0.341748	0.0368863
38.2998	-0.0468554	-0.0117923	-0.0571234	-0.212893	-0.0864294	0.0242394	0.00753867	-0.254269	0.23759	-0.460235	0.158213	0.0357535	0.121232	-0.331707	0.0249749
38.3999	-0.0464629	-0.0171323	-0.0380518	-0.234352	-0.0905176	0.0270928	-0.00234125	-0.237544	0.239334	-0.46383	0.167699	0.0221614	0.131199	-0.320381	0.0131627
38.5	-0.0466334	-0.022595	-0.0196573	-0.255825	-0.094195	0.0297556	-0.0120037	-0.219883	0.240597	-0.467063	0.173993	0.00804472	0.140139	-0.308022	0.00174344
38.6001	-0.0472785	-0.0280996	-0.00203152	-0.277164	-0.0975756	0.0323115	-0.0211913	-0.201495	0.241391	-0.469793	0.176928	-0.00654888	0.14783	-0.294855	-0.00898539
38.7002	-0.0482921	-0.0335108	0.0147474	-0.298163	-0.100901	0.0348313	-0.029626	-0.182572	0.241695	-0.471948	0.176426	-0.0215105	0.154067	-0.281083	-0.0187968
38.7998	-0.0495693	-0.0387579	0.0306375	-0.318652	-0.104471	0.0374388	-0.0371103	-0.163377	0.241427	-0.473459	0.172441	-0.0366972	0.158773	-0.266898	-0.0274008
38.8999	-0.0509925	-0.043726	0.0456312	-0.338414	-0.108633	0.0402044	-0.0433815	-0.144167	0.2405	-0.474317	0.16497	-0.0519773	0.161954	-0.252516	-0.0346163
39	-0.0524326	-0.0483266	0.0597208	-0.357238	-0.113744	0.0432201	-0.0482737	-0.125218	0.238774	-0.474559	0.154103	-0.0671525	0.163728	-0.238109	-0.0402659
39.1001	-0.0537814	-0.0524369	0.0729349	-0.374903	-0.120138	0.0465848	-0.0516267	-0.106798	0.236131	-0.474217	0.140025	-0.0820971	0.164256	-0.223818	-0.0442504
39.2002	-0.0549137	-0.0560113	0.0852964	-0.391147	-0.128071	0.0503595	-0.0533419	-0.0891822	0.232409	-0.47335	0.123043	-0.0966696	0.163966	-0.209741	-0.0465087
39.2998	-0.0557545	-0.0589716	0.096855	-0.405762	-0.137792	0.0546035	-0.0533493	-0.0726556	0.227465	-0.47201	0.103462	-0.110672	0.163205	-0.196031	-0.047016
39.3999	-0.0562225	-0.0612655	0.107631	-0.418502	-0.149446	0.0593795	-0.0516307	-0.0574499	0.221158	-0.470246	0.0817088	-0.12393	0.162443	-0.182789	-0.0458316
39.5	-0.0562649	-0.0628639	0.117706	-0.42922	-0.163102	0.0647164	-0.0482164	-0.0437967	0.213369	-0.468111	0.0582443	-0.136321	0.162173	-0.170112	-0.0430278
39.6001	-0.0558651	-0.0637375	0.127134	-0.437821	-0.178752	0.0706446	-0.0431713	-0.0318697	0.204028	-0.465636	0.0336697	-0.14767	0.162943	-0.158038	-0.038824
39.7002	-0.0550069	-0.0639035	0.136015	-0.444279	-0.19623	0.0771697	-0.0366181	-0.0218056	0.193086	-0.462809	0.00854766	-0.157903	0.165222	-0.146605	-0.0334815
39.7998	-0.0537358	-0.0633485	0.144384	-0.448556	-0.215278	0.0842671	-0.0287005	-0.0137066	0.18058	-0.459624	-0.0164885	-0.166889	0.169434	-0.135799	-0.0272654
39.8999	-0.0520913	-0.0621329	0.152349	-0.450732	-0.235592	0.0918774	-0.0195871	-0.00761512	0.166578	-0.456061	-0.0408606	-0.174557	0.175989	-0.125615	-0.0204657
40	-0.0501549	-0.0603	0.160021	-0.450908	-0.256781	0.0999456	-0.00945699	-0.00353399	0.151196	-0.452129	-0.0639952	-0.180895	0.185141	-0.116018	-0.0133761
40.1001	-0.0480275	-0.0579483	0.167501	-0.449217	-0.278435	0.108405	0.00150469	-0.00146035	0.134641	-0.447793	-0.0853273	-0.185885	0.197085	-0.10696	-0.00636088
40.2002	-0.0458272	-0.0551655	0.174892	-0.445823	-0.300074	0.117112	0.0131085	-0.00129441	0.117134	-0.443026	-0.104395	-0.189502	0.211841	-0.0983323	0.000307209
40.2998	-0.0436975	-0.0520642	0.182304	-0.440893	-0.321204	0.125957	0.025165	-0.00295341	0.0989821	-0.437839	-0.120786	-0.191736	0.229297	-0.0900367	0.00632299
40.3999	-0.0417547	-0.0487639	0.189785	-0.434635	-0.341326	0.134765	0.0375191	-0.00631476	0.0805023	-0.43225	-0.134232	-0.192658	0.249245	-0.081991	0.0114633
40.5	-0.0401365	-0.045407	0.197407	-0.427231	-0.359959	0.143367	0.049999	-0.0112192	0.0620549	-0.426287	-0.144538	-0.192303	0.271358	-0.0741372	0.0155202
40.6001	-0.0389493	-0.0421397	0.205177	-0.418885	-0.376667	0.151532	0.0624828	-0.0174811	0.043987	-0.420007	-0.151624	-0.190766	0.295155	-0.0663624	0.0184175
40.7002	-0.0382914	-0.0391052	0.213075	-0.409744	-0.391025	0.159072	0.0748515	-0.0249174	0.0266346	-0.413487	-0.155504	-0.188133	0.320136	-0.0586275	0.0201112
40.7998	-0.038249	-0.0364254	0.221014	-0.399945	-0.40266	0.165718	0.0870358	-0.0333379	0.0103005	-0.406792	-0.1563	-0.18449	0.345691	-0.0508526	0.0206033
40.8999	-0.0388529	-0.0342142	0.228843	-0.389586	-0.411246	0.171253	0.0989683	-0.0425382	-0.0047346	-0.399994	-0.154255	-0.179901	0.371229	-0.0430549	0.0199701
41	-0.040122	-0.0325396	0.236406	-0.378747	-0.416522	0.175409	0.110596	-0.0523435	-0.0182515	-0.393159	-0.149714	-0.174475	0.396071	-0.0352164	0.0183469
41.1001	-0.0420343	-0.0314562	0.243501	-0.367458	-0.418286	0.178013	0.12192	-0.0625417	-0.0301166	-0.386332	-0.143022	-0.168317	0.419633	-0.0274015	0.015915
41.2002	-0.044533	-0.0309336	0.249893	-0.355804	-0.41636	0.178829	0.132936	-0.0729244	-0.0402936	-0.379579	-0.134622	-0.161487	0.441368	-0.0196934	0.0128652
41.2998	-0.0475146	-0.0309375	0.255297	-0.34383	-0.410643	0.177729	0.143703	-0.0832804	-0.0488209	-0.372948	-0.124925	-0.154056	0.460775	-0.0122275	0.0094415
41.3999	-0.0508482	-0.0313451	0.259441	-0.331594	-0.4011	0.174589	0.154232	-0.0934457	-0.0558261	-0.366429	-0.114399	-0.146029	0.477477	-0.00516216	0.00581182
41.5	-0.0543673	-0.0320146	0.262049	-0.3192	-0.387755	0.16939	0.164614	-0.103209	-0.061519	-0.360065	-0.103483	-0.137419	0.49123	0.00134316	0.00219548
41.6001	-0.0578932	-0.0327642	0.262888	-0.306739	-0.370716	0.162159	0.174937	-0.11238	-0.066224	-0.353795	-0.0926003	-0.128202	0.501812	0.00710766	-0.00126063
41.7002	-0.0612136	-0.0333479	0.261749	-0.29439	-0.350149	0.152979	0.185268	-0.12076	-0.0703261	-0.347547	-0.0821292	-0.118368	0.509223	0.0119509	-0.00443827
41.7998	-0.0641189	-0.0335081	0.258463	-0.282312	-0.326303	0.142045	0.195709	-0.128158	-0.0742624	-0.341254	-0.0724193	-0.107817	0.513475	0.0157108	-0.00723254
41.8999	-0.0663924	-0.0329831	0.252964	-0.270705	-0.299545	0.129584	0.206356	-0.134374	-0.0784809	-0.334883	-0.0637389	-0.0964472	0.514757	0.0182386	-0.00958811
42	-0.067821	-0.0315373	0.245231	-0.259782	-0.270324	0.115916	0.217308	-0.13924	-0.0834624	-0.328363	-0.0562606	-0.084149	0.513325	0.0194109	-0.0114688
42.1001	-0.0682078	-0.0289777	0.235319	-0.249756	-0.239129	0.101405	0.22868	-0.14258	-0.0896742	-0.321647	-0.050083	-0.0708152	0.509514	0.0191253	-0.0129031
42.2002	-0.0673733	-0.0251172	0.223385	-0.240905	-0.206546	0.0864955	0.240545	-0.144254	-0.0975681	-0.31469	-0.0452196	-0.0562987	0.503713	0.0173291	-0.0138796
42.2998	-0.0651798	-0.0198663	0.209633	-0.233425	-0.173191	0.0716469	0.252951	-0.144143	-0.107549	-0.307478	-0.0416017	-0.0405158	0.496384	0.0140375	-0.0144499
42.3999	-0.061512	-0.01315	0.194359	-0.227519	-0.13976	0.057296	0.265953	-0.14212	-0.119944	-0.300008	-0.039084	-0.0233824	0.488007	0.00927735	-0.0146617
42.5	-0.0562996	-0.00503426	0.177904	-0.223377	-0.10695	0.0439275	0.279526	-0.138138	-0.134989	-0.292313	-0.0375069	-0.00486434	0.479136	0.00311782	-0.0145053
42.6001	-0.0495063	0.00437085	0.160627	-0.22107	-0.0754719	0.031959	0.293623	-0.132178	-0.152843	-0.284399	-0.0365917	0.0150326	0.470198	-0.00435277	-0.0139807
42.7002	-0.0411545	0.0148593	0.142931	-0.220627	-0.0460366	0.0217797	0.308157	-0.124266	-0.173503	-0.276286	-0.0360466	0.0362744	0.46161	-0.0130269	-0.0130805
42.7998	-0.0312912	0.0261146	0.125234	-0.221976	-0.0192935	0.0137174	0.322973	-0.114478	-0.196841	-0.267996	-0.0355853	0.058777	0.453719	-0.0228034	-0.0117873
42.8999	-0.0199906	0.0378243	0.107906	-0.225039	0.00418136	0.0080278	0.337912	-0.102927	-0.222645	-0.25954	-0.0348777	0.0823743	0.446823	-0.0335622	-0.0100611
43	-0.00738985	0.0496079	0.0912855	-0.229638	0.0238709	0.00489607	0.3527	-0.0897818	-0.250583	-0.250958	-0.0336116	0.106866	0.441071	-0.0452073	-0.00782763
43.1001	0.00637244	0.0610768	0.0756472	-0.235565	0.039395	0.00446323	0.367058	-0.0752584	-0.280244	-0.242226	-0.0314852	0.131924	0.436516	-0.0576255	-0.005041
43.2002	0.0211234	0.0718189	0.0612543	-0.242516	0.0504721	0.00671213	0.380724	-0.0596391	-0.311119	-0.233312	-0.028245	0.157256	0.433178	-0.070719	-0.00164782
43.2998	0.036658	0.0814434	0.0482672	-0.250166	0.0569496	0.0116409	0.393351	-0.0432228	-0.342611	-0.224181	-0.0237325	0.182482	0.430892	-0.084438	0.00239003
43.3999	0.0527755	0.0895616	0.0368174	-0.258228	0.0588171	0.0190719	0.404614	-0.0263685	-0.374093	-0.214756	-0.0178216	0.207218	0.429372	-0.098735	0.00721181
43.5	0.0692435	0.095894	0.0269487	-0.266399	0.0561821	0.0288262	0.41417	-0.00948577	-0.404874	-0.204959	-0.0105168	0.231059	0.428281	-0.113548	0.0127622
43.6001	0.0858566	0.100155	0.0186575	-0.274451	0.0492881	0.0406061	0.421696	0.00709767	-0.434296	-0.194731	-0.00189786	0.253596	0.427183	-0.12882	0.019024
43.7002	0.102401	0.102213	0.0118597	-0.282101	0.0384936	0.0541141	0.426897	0.0229815	-0.461734	-0.183962	0.00790749	0.274443	0.425603	-0.14446	0.0259324
43.7998	0.118662	0.101967	0.00642757	-0.289126	0.0242163	0.0689801	0.429539	0.0378272	-0.48659	-0.172568	0.0186837	0.293232	0.423074	-0.160378	0.0333844
43.8999	0.134447	0.0994459	0.0021265	-0.295376	0.00697501	0.0848607	0.429385	0.0513217	-0.508357	-0.160466	0.0301545	0.309625	0.419154	-0.176464	0.0412465
44	0.149596	0.0947023	-0.00123615	-0.300746	-0.0126793	0.101361	0.426295	0.0632066	-0.526585	-0.14764	0.0419835	0.323356	0.41337	-0.192557	0.0493757
44.1001	0.163949	0.0878931	-0.00390644	-0.305212	-0.0341425	0.11807	0.420135	0.0732936	-0.540987	-0.134095	0.0538125	0.33425	0.405395	-0.208448	0.0575715
44.2002	0.177405	0.0791993	-0.00616474	-0.308774	-0.0568016	0.134618	0.410849	0.081427	-0.551352	-0.119854	0.065243	0.342154	0.395005	-0.223901	0.0655862
44.2998	0.189842	0.0688653	-0.00826664	-0.311512	-0.0800692	0.150625	0.398472	0.0875446	-0.557589	-0.104997	0.0758971	0.347023	0.3821	-0.238654	0.0732042
44.3999	0.201218	0.0572043	-0.0104849	-0.313483	-0.103408	0.16574	0.383048	0.091654	-0.55978	-0.089654	0.0854014	0.348812	0.366691	-0.252417	0.0802156
44.5	0.21149	0.0445281	-0.0130636	-0.314781	-0.126325	0.179609	0.364715	0.0938191	-0.558133	-0.0739939	0.0934424	0.347633	0.348913	-0.264876	0.0864564
44.6001	0.220662	0.0311804	-0.0162413	-0.315476	-0.148416	0.191961	0.343633	0.0942435	-0.552985	-0.0582842	0.0997821	0.343617	0.329039	-0.275696	0.0917398
44.7002	0.228774	0.0174913	-0.0202162	-0.31572	-0.169315	0.202503	0.320019	0.0931224	-0.544783	-0.0428435	0.104222	0.336981	0.307539	-0.284565	0.0959321
44.7998	0.235864	0.00374314	-0.025181	-0.315591	-0.188722	0.210995	0.294112	0.0907399	-0.534059	-0.0280074	0.106638	0.328022	0.284913	-0.291206	0.0989343
44.8999	0.242023	-0.00978131	-0.0312597	-0.315142	-0.206415	0.217209	0.266156	0.0874311	-0.521495	-0.0140834	0.107006	0.317012	0.261758	-0.295447	0.100708
45	0.247338	-0.0228238	-0.0385878	-0.314397	-0.222221	0.220976	0.236413	0.0835333	-0.507783	-0.00142737	0.105366	0.304326	0.238721	-0.297103	0.101227
45.1001	0.251932	-0.0351529	-0.0471956	-0.31337	-0.236058	0.222143	0.20515	0.0794096	-0.493635	0.00958831	0.101787	0.290334	0.216451	-0.296151	0.100559
45.2002	0.255922	-0.0465913	-0.0570776	-0.312087	-0.247849	0.220591	0.172614	0.075405	-0.479799	0.0186089	0.0964521	0.275381	0.195614	-0.292614	0.098797
45.2998	0.25944	-0.0569959	-0.0681726	-0.310497	-0.257563	0.216252	0.139087	0.0718472	-0.466952	0.0253159	0.0895396	0.259844	0.176785	-0.286619	0.0960542
45.3999	0.262596	-0.0662651	-0.0804007	-0.308597	-0.265195	0.209109	0.104821	0.069021	-0.455758	0.0294171	0.0812903	0.244016	0.160505	-0.278318	0.0925409
45.5	0.265516	-0.0743656	-0.0936033	-0.306265	-0.270725	0.199155	0.0700734	0.0671587	-0.44676	0.0307186	0.0719248	0.228246	0.147165	-0.267986	0.0884591
45.6001	0.268284	-0.0812245	-0.107615	-0.303504	-0.274158	0.186482	0.0351023	0.0664458	-0.440458	0.0290371	0.0616878	0.212832	0.137051	-0.255924	0.084118
45.7002	0.270998	-0.0868626	-0.122231	-0.300281	-0.275493	0.171185	0.000176381	0.0669993	-0.43719	0.0242695	0.0507812	0.198044	0.130358	-0.242476	0.0797845
45.7998	0.273701	-0.0912896	-0.137196	-0.296601	-0.274699	0.153428	-0.0344419	0.0688698	-0.437142	0.0164062	0.0393711	0.184067	0.127098	-0.228093	0.0757352
45.8999	0.276442	-0.0945773	-0.152271	-0.2925	-0.271735	0.133422	-0.0684879	0.0720417	-0.440405	0.00552708	0.0276638	0.171022	0.127177	-0.213203	0.0723287
46	0.279238	-0.0967994	-0.16716	-0.288008	-0.266521	0.111472	-0.101691	0.0764237	-0.446851	-0.00824514	0.0157845	0.159021	0.130402	-0.198262	0.0698339
46.1001	0.282097	-0.0980621	-0.181645	-0.28321	-0.259008	0.0879186	-0.133761	0.0819116	-0.456237	-0.0246743	0.00386897	0.148127	0.136382	-0.183674	0.0685197
46.2002	0.284989	-0.0984894	-0.195448	-0.278214	-0.249144	0.0631499	-0.164395	0.0882901	-0.468161	-0.0434209	-0.00804275	0.138342	0.144746	-0.169775	0.068657
46.2998	0.287879	-0.0982376	-0.208351	-0.273189	-0.236855	0.0376297	-0.193299	0.0953624	-0.482111	-0.0641187	-0.0199354	0.129683	0.155039	-0.156852	0.0705282
46.3999	0.290718	-0.0974398	-0.220148	-0.268264	-0.222151	0.0118214	-0.220137	0.102922	-0.497436	-0.0863046	-0.0317934	0.122097	0.16671	-0.145169	0.0742933
46.5	0.293443	-0.0963069	-0.230683	-0.263628	-0.205034	-0.0137293	-0.244603	0.110719	-0.513411	-0.109444	-0.0435678	0.115602	0.179206	-0.134919	0.0801584
46.6001	0.295993	-0.0949966	-0.239811	-0.25948	-0.185585	-0.0384713	-0.266384	0.118509	-0.529255	-0.132978	-0.0551991	0.110169	0.191936	-0.126258	0.0882341
46.7002	0.298312	-0.0936881	-0.247442	-0.256006	-0.163909	-0.0618362	-0.285168	0.126033	-0.544151	-0.156357	-0.0666016	0.105765	0.204313	-0.11924	0.0985872
46.7998	0.300334	-0.0925457	-0.253521	-0.253362	-0.140166	-0.0832632	-0.300709	0.133062	-0.557315	-0.178997	-0.0777142	0.102386	0.215797	-0.113897	0.111145
46.8999	0.302025	-0.091725	-0.258032	-0.25169	-0.114654	-0.102264	-0.312809	0.139414	-0.568011	-0.200313	-0.0884468	0.100099	0.225861	-0.110198	0.125794
47	0.303345	-0.0913893	-0.260958	-0.25109	-0.0877248	-0.118349	-0.321276	0.144889	-0.575552	-0.219784	-0.0987087	0.0990154	0.234023	-0.108118	0.142315
47.1001	0.304272	-0.0916831	-0.262312	-0.251661	-0.0598163	-0.131115	-0.325993	0.149352	-0.579416	-0.236896	-0.108389	0.0992648	0.239796	-0.107598	0.160416
47.2002	0.30479	-0.0927169	-0.262098	-0.253394	-0.031451	-0.140237	-0.326892	0.152672	-0.579163	-0.251229	-0.117382	0.101015	0.242807	-0.108569	0.179741
47.2998	0.304911	-0.0945384	-0.260344	-0.25625	-0.0032011	-0.145442	-0.323983	0.15477	-0.574534	-0.262421	-0.125554	0.10441	0.24273	-0.110899	0.199879
47.3999	0.304647	-0.0971814	-0.257092	-0.260112	0.0242897	-0.146625	-0.317366	0.155582	-0.565408	-0.27022	-0.132842	0.109577	0.239335	-0.114458	0.220303
47.5	0.304023	-0.100599	-0.252356	-0.264736	0.0504041	-0.143783	-0.307219	0.155061	-0.551841	-0.274427	-0.139203	0.116742	0.232428	-0.119156	0.240452
47.6001	0.303081	-0.104736	-0.246197	-0.269869	0.0745294	-0.137	-0.293791	0.153212	-0.534074	-0.27499	-0.144649	0.126071	0.221983	-0.124893	0.259773
47.7002	0.301846	-0.109453	-0.23863	-0.275133	0.0960626	-0.12649	-0.277396	0.150051	-0.512487	-0.271909	-0.149244	0.137745	0.208048	-0.131608	0.277664
47.7998	0.300368	-0.114613	-0.229708	-0.280156	0.114431	-0.11254	-0.258425	0.145634	-0.487604	-0.265271	-0.153107	0.151882	0.190749	-0.139176	0.293541
47.8999	0.298687	-0.119991	-0.219492	-0.284515	0.129133	-0.0955665	-0.237316	0.140067	-0.460021	-0.255289	-0.156406	0.168562	0.170384	-0.147516	0.306824
48	0.296861	-0.125375	-0.208058	-0.287766	0.13979	-0.0760332	-0.214603	0.133463	-0.430451	-0.242206	-0.159321	0.187829	0.147281	-0.156491	0.317051
48.1001	0.294932	-0.130501	-0.195524	-0.289484	0.146123	-0.0544572	-0.190836	0.12601	-0.399679	-0.226361	-0.16212	0.209576	0.121936	-0.166003	0.323876
48.2002	0.292934	-0.135099	-0.181975	-0.289284	0.147989	-0.0313953	-0.166561	0.117869	-0.368514	-0.208118	-0.165113	0.233677	0.0949151	-0.175932	0.327034
48.2998	0.290891	-0.138937	-0.167576	-0.286783	0.145357	-0.0074026	-0.142355	0.109253	-0.337743	-0.18789	-0.168569	0.259903	0.0668686	-0.186145	0.326389
48.3999	0.288832	-0.141759	-0.152479	-0.281712	0.138344	0.0169523	-0.118805	0.100379	-0.3081	-0.166104	-0.172775	0.288011	0.0384394	-0.196488	0.32193
48.5	0.286771	-0.14338	-0.13687	-0.273836	0.127237	0.041172	-0.096464	0.091457	-0.280302	-0.143177	-0.177982	0.317657	0.010319	-0.206752	0.313805
48.6001	0.284712	-0.143609	-0.120926	-0.263079	0.112412	0.064787	-0.0758969	0.0827285	-0.254957	-0.119569	-0.184412	0.348433	-0.0167106	-0.216794	0.302246
48.7002	0.282659	-0.142352	-0.104836	-0.249464	0.0943377	0.087414	-0.0576421	0.0744119	-0.232537	-0.0957226	-0.192225	0.379925	-0.0420486	-0.226403	0.28764
48.7998	0.280603	-0.139541	-0.0887644	-0.233155	0.0735793	0.108738	-0.04216	0.0666889	-0.213431	-0.0720174	-0.201474	0.411665	-0.0650489	-0.235395	0.270485
48.8999	0.278535	-0.135209	-0.0728819	-0.214445	0.0507351	0.128496	-0.0298594	0.0597452	-0.197857	-0.048856	-0.212127	0.443161	-0.085223	-0.243566	0.251316
49	0.27644	-0.129426	-0.0573828	-0.193692	0.0264689	0.146529	-0.0210378	0.0537039	-0.185939	-0.0266118	-0.224067	0.473964	-0.102151	-0.250797	0.230793
49.1001	0.274305	-0.122353	-0.0424482	-0.171423	0.00141791	0.162758	-0.0159145	0.0486513	-0.177615	-0.00562831	-0.237083	0.503607	-0.115567	-0.25691	0.20948
49.2002	0.272107	-0.114184	-0.0282003	-0.148196	-0.0237942	0.177138	-0.0146046	0.0445972	-0.17272	0.0137873	-0.250934	0.531679	-0.125303	-0.261794	0.188057
49.2998	0.269821	-0.105191	-0.0147535	-0.124649	-0.0485448	0.189713	-0.0171259	0.0415624	-0.170963	0.0313376	-0.265288	0.55781	-0.131381	-0.26537	0.167084
49.3999	0.267431	-0.0956595	-0.00214215	-0.10143	-0.0723016	0.200553	-0.0233743	0.039512	-0.171964	0.0467207	-0.279814	0.581649	-0.133949	-0.267576	0.147118
49.5	0.264923	-0.0859378	0.00958996	-0.0792116	-0.0946071	0.209743	-0.0331092	0.0383373	-0.175229	0.0597086	-0.294127	0.602962	-0.133265	-0.268431	0.128513
49.6001	0.262308	-0.076319	0.0204294	-0.0586152	-0.115049	0.217378	-0.0460218	0.0378872	-0.180182	0.0700491	-0.307818	0.621577	-0.129736	-0.267982	0.111576
49.7002	0.259576	-0.067099	0.0303438	-0.0401665	-0.13333	0.223596	-0.0616377	0.0379758	-0.18621	0.0775209	-0.320552	0.637419	-0.123813	-0.266322	0.0965349
49.7998	0.256753	-0.0585769	0.0393599	-0.0243595	-0.14917	0.228494	-0.0794446	0.0384163	-0.192624	0.0819791	-0.331958	0.650467	-0.116049	-0.263552	0.0835153
49.8999	0.253855	-0.0509527	0.0474794	-0.0115355	-0.162336	0.232164	-0.098846	0.0390199	-0.198775	0.0832784	-0.341804	0.660728	-0.107023	-0.259865	0.0724851
50	0.250928	-0.0443915	0.054693	-0.00193253	-0.172709	0.234676	-0.119193	0.0395609	-0.203941	0.0812879	-0.34989	0.668306	-0.0973098	-0.255431	0.0633127
50.1001	0.248025	-0.0389803	0.0609739	0.00433778	-0.180203	0.236063	-0.139833	0.0398899	-0.207485	0.0759099	-0.35606	0.673356	-0.0874574	-0.250479	0.0558244
50.2002	0.245205	-0.0347194	0.0662744	0.00736559	-0.184748	0.236292	-0.160074	0.0398474	-0.208779	0.067114	-0.360293	0.676026	-0.0780341	-0.245256	0.0497819
50.2998	0.242532	-0.031536	0.0705412	0.00733021	-0.186331	0.235382	-0.179283	0.039328	-0.207272	0.0548848	-0.362619	0.676535	-0.0695198	-0.239984	0.0449582
50.3999	0.240082	-0.029302	0.0737055	0.00458448	-0.18494	0.233271	-0.196823	0.0382351	-0.202493	0.0392736	-0.363135	0.675107	-0.062383	-0.234879	0.0410978
50.5	0.23792	-0.0277475	0.0756834	-0.000365621	-0.1806	0.229904	-0.212175	0.0364825	-0.194051	0.0203706	-0.36206	0.671979	-0.0569635	-0.230123	0.0379506
50.6001	0.236125	-0.0266127	0.0763796	-0.00696991	-0.173393	0.22521	-0.2249	0.0340649	-0.181685	-0.00170625	-0.35959	0.667418	-0.0535389	-0.225869	0.0352899
50.7002	0.23476	-0.0255484	0.0757063	-0.0146118	-0.163375	0.219141	-0.234693	0.0309735	-0.165297	-0.0267795	-0.35602	0.661577	-0.0522905	-0.222229	0.0329763
50.7998	0.233869	-0.0242018	0.0735643	-0.0226352	-0.15067	0.211627	-0.241319	0.027255	-0.144868	-0.0545994	-0.351628	0.65465	-0.0533558	-0.219286	0.030924
50.8999	0.23348	-0.0222157	0.0698793	-0.0303572	-0.135409	0.202652	-0.244708	0.0229801	-0.120461	-0.08488	-0.346745	0.6468	-0.0567734	-0.217134	0.0291025
51	0.233608	-0.0192346	0.0645502	-0.0370945	-0.11779	0.192193	-0.244865	0.0182168	-0.0923619	-0.117266	-0.341674	0.638192	-0.0625629	-0.215759	0.0275804
51.1001	0.234252	-0.0149621	0.0575159	-0.0422511	-0.0980487	0.180266	-0.241952	0.0130483	-0.0608864	-0.15135	-0.336682	0.628954	-0.0706471	-0.215137	0.0264531
51.2002	0.23538	-0.00915237	0.0487192	-0.0452848	-0.0764364	0.16694	-0.236181	0.00753029	-0.0265535	-0.186677	-0.332021	0.619192	-0.0809222	-0.215129	0.0258962
51.2998	0.236942	-0.00161265	0.0381601	-0.0457551	-0.0532638	0.15231	-0.227901	0.0017561	0.0100643	-0.22275	-0.327873	0.608993	-0.0932322	-0.215628	0.0260297
51.3999	0.238889	0.0077797	0.0258863	-0.043349	-0.0289068	0.136573	-0.217481	-0.00419483	0.0483357	-0.259042	-0.324415	0.598436	-0.107356	-0.216515	0.0270807
51.5	0.241137	0.0190216	0.0119703	-0.0378278	-0.00378513	0.119897	-0.205314	-0.0102933	0.0875608	-0.295001	-0.321718	0.587607	-0.122996	-0.217623	0.0292054
51.6001	0.243618	0.0320316	-0.00348873	-0.0291542	0.0216705	0.102582	-0.191834	-0.0165146	0.127007	-0.330048	-0.319813	0.576577	-0.139835	-0.218767	0.0325929
51.7002	0.246228	0.0466323	-0.0203192	-0.0174594	0.0469602	0.0848804	-0.177457	-0.0228828	0.165942	-0.363635	-0.3187	0.565432	-0.157564	-0.219787	0.0373384
51.7998	0.248871	0.0626178	-0.0383207	-0.00306382	0.0716005	0.0671345	-0.162561	-0.0294433	0.203655	-0.395266	-0.318321	0.554275	-0.175786	-0.220481	0.0435029
51.8999	0.251453	0.0796605	-0.0572111	0.0136435	0.095061	0.0496517	-0.147504	-0.0362373	0.239458	-0.424469	-0.318528	0.543214	-0.194138	-0.220742	0.0510732
52	0.253887	0.0974446	-0.0767176	0.0321595	0.116857	0.0328119	-0.132544	-0.0433896	0.272771	-0.45083	-0.3192	0.532317	-0.212137	-0.220468	0.0599767
52.1001	0.256095	0.11558	-0.0965063	0.0518328	0.136523	0.0169448	-0.117852	-0.0509651	0.303052	-0.474043	-0.32011	0.521681	-0.229367	-0.219613	0.0700952
52.2002	0.258003	0.133709	-0.116261	0.071979	0.153594	0.00245481	-0.103601	-0.0590867	0.329893	-0.493877	-0.321061	0.511393	-0.245398	-0.218115	0.0812036
52.2998	0.259547	0.15143	-0.135603	0.0918659	0.167696	-0.0103586	-0.0898313	-0.0678798	0.353026	-0.510194	-0.321875	0.501562	-0.259812	-0.215967	0.0930749
52.3999	0.260658	0.168389	-0.154202	0.110799	0.178504	-0.0211466	-0.0765427	-0.0774408	0.372235	-0.522996	-0.322345	0.492319	-0.272181	-0.213212	0.1054
52.5	0.261306	0.184256	-0.171732	0.12806	0.185782	-0.0296723	-0.063666	-0.0878933	0.38743	-0.532385	-0.322251	0.483739	-0.28208	-0.209955	0.117844
52.6001	0.261433	0.198719	-0.187895	0.143026	0.189399	-0.0357032	-0.0511079	-0.0993297	0.398623	-0.53856	-0.321454	0.475882	-0.28923	-0.206302	0.130093
52.7002	0.261009	0.211567	-0.202398	0.155194	0.18929	-0.0390676	-0.038783	-0.111828	0.405905	-0.541817	-0.319843	0.468784	-0.293381	-0.202378	0.141804
52.7998	0.259978	0.222617	-0.214985	0.164131	0.185502	-0.039674	-0.0265568	-0.125392	0.409486	-0.542526	-0.317337	0.462417	-0.294387	-0.198277	0.152657
52.8999	0.258318	0.231751	-0.225456	0.169567	0.178185	-0.0374768	-0.0142924	-0.140008	0.409628	-0.541135	-0.313915	0.456752	-0.292156	-0.194131	0.162377
53	0.255982	0.238889	-0.233639	0.171352	0.167579	-0.0325767	-0.00193453	-0.15558	0.406611	-0.538115	-0.30958	0.451699	-0.28668	-0.190077	0.170742
53.1001	0.252932	0.244002	-0.239447	0.169524	0.154035	-0.0250654	0.0106026	-0.171957	0.400765	-0.533979	-0.304406	0.447135	-0.278085	-0.18625	0.177586
53.2002	0.249146	0.247069	-0.242848	0.164218	0.13797	-0.0151757	0.0233223	-0.188945	0.392423	-0.52924	-0.298537	0.442906	-0.266559	-0.182718	0.182816
53.2998	0.244566	0.248124	-0.243895	0.155728	0.119857	-0.00316115	0.0361856	-0.206293	0.381901	-0.524364	-0.292169	0.438812	-0.252386	-0.179597	0.186375
53.3999	0.239195	0.24722	-0.242659	0.144451	0.100241	0.0106099	0.0490775	-0.223712	0.369477	-0.519788	-0.285482	0.43465	-0.235917	-0.176956	0.188267
53.5	0.232998	0.244413	-0.239264	0.130894	0.0796954	0.0257429	0.0618416	-0.240898	0.355412	-0.515891	-0.278719	0.430133	-0.217568	-0.17484	0.188587
53.6001	0.225994	0.239742	-0.233864	0.11569	0.0588235	0.04178	0.0742968	-0.257472	0.339929	-0.513008	-0.272135	0.425032	-0.197789	-0.173212	0.187481
53.7002	0.218188	0.23328	-0.226694	0.0994516	0.0381709	0.0582501	0.0861886	-0.273079	0.323179	-0.511352	-0.265976	0.419123	-0.177012	-0.172066	0.185204
53.7998	0.209621	0.225101	-0.217991	0.0828852	0.0182507	0.0746535	0.0972838	-0.287328	0.305316	-0.511073	-0.260505	0.412216	-0.155768	-0.171325	0.182003
53.8999	0.20035	0.215252	-0.208002	0.0666088	-0.000470738	0.0904272	0.107336	-0.29988	0.286386	-0.512247	-0.25591	0.404142	-0.134471	-0.170922	0.178185
54	0.190464	0.203787	-0.197039	0.0511969	-0.017573	0.105045	0.116102	-0.310452	0.26645	-0.514869	-0.252393	0.394744	-0.11354	-0.170806	0.174084
54.1001	0.180065	0.190792	-0.185375	0.037173	-0.0327238	0.117977	0.123369	-0.318797	0.245537	-0.518868	-0.250003	0.383988	-0.0933063	-0.170894	0.169975
54.2002	0.169289	0.176329	-0.173292	0.0249954	-0.0456984	0.128765	0.128971	-0.324755	0.223626	-0.52413	-0.248762	0.371842	-0.0740886	-0.171124	0.166168
54.2998	0.158286	0.160501	-0.161047	0.0150609	-0.056388	0.136963	0.13278	-0.328212	0.200729	-0.53044	-0.248612	0.35832	-0.0560652	-0.171406	0.162953
54.3999	0.147212	0.143401	-0.148884	0.00763262	-0.0647649	0.14217	0.134702	-0.329176	0.176866	-0.537598	-0.249419	0.343526	-0.0393423	-0.171693	0.160622
54.5	0.136241	0.125153	-0.137003	0.00289614	-0.070939	0.144104	0.134708	-0.327745	0.15209	-0.545337	-0.251012	0.327575	-0.023967	-0.171875	0.159355
54.6001	0.125537	0.105902	-0.125622	0.000936238	-0.075094	0.142512	0.132864	-0.324081	0.126483	-0.553367	-0.25315	0.310679	-0.00985852	-0.171859	0.159363
54.7002	0.115269	0.0857966	-0.114899	0.00174199	-0.077479	0.137257	0.129285	-0.318432	0.100156	-0.561356	-0.255525	0.293121	0.00307049	-0.171597	0.160698
54.7998	0.105595	0.065018	-0.105025	0.00516845	-0.0784191	0.128325	0.124151	-0.311119	0.0732745	-0.568998	-0.257807	0.275146	0.0150196	-0.171028	0.163445
54.8999	0.0966489	0.0437821	-0.0961096	0.0109276	-0.078234	0.115815	0.117699	-0.302484	0.0460667	-0.575965	-0.259607	0.257091	0.0261974	-0.170055	0.167557
55	0.0885591	0.0222863	-0.088299	0.0187281	-0.0772602	0.0998908	0.110176	-0.292978	0.018794	-0.581961	-0.260592	0.239232	0.0368864	-0.168633	0.172917
55.1001	0.0814176	0.000767517	-0.0816862	0.0281684	-0.0758582	0.0808327	0.101908	-0.283001	-0.00821547	-0.586688	-0.260424	0.221871	0.0473351	-0.166742	0.179321
55.2002	0.0752831	-0.0205681	-0.0763895	0.0388543	-0.0743789	0.0590414	0.0931928	-0.272956	-0.0346164	-0.589898	-0.258855	0.205313	0.057768	-0.164417	0.186535
55.2998	0.0701707	-0.0415204	-0.0725004	0.0503145	-0.0731389	0.0349727	0.0843162	-0.263205	-0.0600161	-0.591358	-0.255708	0.189871	0.0684236	-0.161668	0.194256
55.3999	0.0660756	-0.0619132	-0.0700666	0.0620646	-0.072393	0.0092177	0.075575	-0.254063	-0.0840062	-0.590877	-0.250875	0.175832	0.0794246	-0.158526	0.202171
55.5	0.0629403	-0.0815722	-0.0691549	0.0735806	-0.0723463	-0.0176586	0.0672572	-0.245842	-0.106161	-0.58833	-0.244367	0.163411	0.0908581	-0.155013	0.209915
55.6001	0.0606927	-0.100405	-0.069853	0.0843847	-0.0731291	-0.0449774	0.0596336	-0.238747	-0.126055	-0.583649	-0.236256	0.152766	0.102718	-0.151183	0.21714
55.7002	0.0592152	-0.118272	-0.0721743	0.0939967	-0.0747912	-0.0721208	0.0529174	-0.232904	-0.143295	-0.576846	-0.226771	0.144016	0.115002	-0.147137	0.223522
55.7998	0.058368	-0.13515	-0.0761416	0.10201	-0.0773297	-0.0984459	0.0472699	-0.228379	-0.157492	-0.567963	-0.216191	0.13727	0.127534	-0.142999	0.228748
55.8999	0.0579857	-0.151009	-0.0817873	0.108029	-0.080654	-0.123337	0.0428259	-0.225159	-0.168368	-0.55711	-0.204938	0.132606	0.140115	-0.138871	0.232552
56	0.0578911	-0.165879	-0.0890543	0.111751	-0.084628	-0.146282	0.0396694	-0.223195	-0.17564	-0.544459	-0.193465	0.130017	0.152538	-0.134853	0.234726
56.1001	0.0578896	-0.179802	-0.0978472	0.112952	-0.0890567	-0.166778	0.0378004	-0.222362	-0.179122	-0.530238	-0.182285	0.129446	0.164473	-0.131015	0.235115
56.2002	0.0577888	-0.192869	-0.108021	0.111507	-0.0937124	-0.184492	0.0372086	-0.222465	-0.17867	-0.514751	-0.171898	0.130842	0.175668	-0.127465	0.233681
56.2998	0.0573841	-0.20517	-0.119372	0.107359	-0.0983337	-0.199138	0.0378058	-0.223286	-0.174244	-0.498339	-0.1628	0.134048	0.18585	-0.1243	0.230431
56.3999	0.0564911	-0.216821	-0.131691	0.100587	-0.102637	-0.210576	0.0395073	-0.224569	-0.165844	-0.481385	-0.155449	0.138942	0.194787	-0.121578	0.22543
56.5	0.0549259	-0.227915	-0.144652	0.0913209	-0.106385	-0.218805	0.0421853	-0.22609	-0.153529	-0.464313	-0.150307	0.145326	0.202295	-0.119318	0.218845
56.6001	0.0525417	-0.238548	-0.157904	0.0798224	-0.109312	-0.223857	0.0456931	-0.227593	-0.137442	-0.44752	-0.14771	0.153019	0.2082	-0.117519	0.210892
56.7002	0.0492156	-0.248783	-0.171019	0.066365	-0.11117	-0.225953	0.0498583	-0.228866	-0.117771	-0.431452	-0.147872	0.161785	0.212486	-0.116172	0.201855
56.7998	0.0448424	-0.258669	-0.183563	0.0512711	-0.111745	-0.225327	0.0544704	-0.229703	-0.0947298	-0.416536	-0.150907	0.171379	0.215186	-0.115265	0.192047
56.8999	0.0393775	-0.268195	-0.195076	0.0349431	-0.110863	-0.222302	0.0593324	-0.22993	-0.068591	-0.403184	-0.156772	0.181491	0.216443	-0.114706	0.181847
57	0.0327983	-0.27737	-0.205128	0.0178318	-0.108432	-0.217274	0.0642268	-0.229416	-0.0396617	-0.391775	-0.165359	0.191882	0.216455	-0.114409	0.171517
57.1001	0.0251335	-0.286111	-0.213278	0.000365107	-0.104373	-0.210631	0.0689915	-0.22803	-0.00831588	-0.382654	-0.176369	0.202294	0.215508	-0.114275	0.161377
57.2002	0.0164519	-0.294328	-0.219212	-0.0170577	-0.0986807	-0.202799	0.0734771	-0.225722	0.0251072	-0.376099	-0.189396	0.212479	0.213929	-0.114204	0.151699
57.2998	0.00683618	-0.301893	-0.222635	-0.0340723	-0.091404	-0.194178	0.077538	-0.222473	0.0602181	-0.372291	-0.203889	0.222154	0.212067	-0.114066	0.142716
57.3999	-0.00356191	-0.308656	-0.223398	-0.0503926	-0.0826491	-0.185166	0.0811259	-0.218294	0.096588	-0.371379	-0.21923	0.231099	0.210288	-0.113776	0.134644
57.5	-0.014599	-0.314462	-0.221443	-0.0657244	-0.0726536	-0.176123	0.0842026	-0.213247	0.13378	-0.373467	-0.23475	0.239041	0.208896	-0.113246	0.127575
57.6001	-0.02609	-0.319165	-0.216816	-0.0799142	-0.06165	-0.167316	0.0867567	-0.207395	0.17133	-0.378555	-0.2497	0.245753	0.208212	-0.112433	0.121578
57.7002	-0.0378401	-0.322623	-0.209694	-0.0928643	-0.0499292	-0.158989	0.0888658	-0.200846	0.208778	-0.386561	-0.263319	0.251053	0.208414	-0.111264	0.116562
57.7998	-0.0496637	-0.324708	-0.20036	-0.104573	-0.0377983	-0.151321	0.0906798	-0.193738	0.24563	-0.39732	-0.274864	0.254745	0.20966	-0.109752	0.112419
57.8999	-0.0613623	-0.325301	-0.189192	-0.115106	-0.0256149	-0.144436	0.0923642	-0.18624	0.281413	-0.410631	-0.283669	0.256711	0.211947	-0.107898	0.109024
58	-0.0727793	-0.324334	-0.176668	-0.124569	-0.013756	-0.138366	0.0941267	-0.17854	0.315631	-0.426209	-0.289111	0.25678	0.215254	-0.105764	0.106148
58.1001	-0.0837431	-0.321785	-0.163338	-0.133159	-0.00259114	-0.133125	0.0962364	-0.170776	0.347803	-0.443737	-0.290713	0.254856	0.219451	-0.103408	0.103542
58.2002	-0.0941462	-0.317675	-0.149777	-0.141083	0.00749317	-0.128616	0.0989196	-0.163137	0.377482	-0.462829	-0.288049	0.250864	0.224328	-0.10094	0.10091
58.2998	-0.1039	-0.312067	-0.136584	-0.148584	0.0161575	-0.124751	0.102483	-0.155776	0.404196	-0.483121	-0.28087	0.244754	0.229579	-0.0984385	0.0979463
58.3999	-0.112936	-0.305038	-0.124325	-0.155903	0.0230947	-0.121331	0.107186	-0.148852	0.427537	-0.504212	-0.269104	0.23647	0.234865	-0.0960442	0.0943948
58.5	-0.121243	-0.29676	-0.113516	-0.163259	0.0280757	-0.118175	0.113233	-0.142516	0.447113	-0.52572	-0.252855	0.226006	0.239887	-0.0938782	0.0899621
58.6001	-0.128817	-0.287399	-0.104567	-0.170822	0.0309464	-0.115056	0.120836	-0.136871	0.46266	-0.547255	-0.232359	0.213335	0.244275	-0.0920466	0.0844766
58.7002	-0.135689	-0.277145	-0.0978052	-0.178767	0.0315932	-0.111731	0.130118	-0.131999	0.473929	-0.568447	-0.208043	0.198496	0.247699	-0.0906347	0.0777475
58.7998	-0.141926	-0.266251	-0.0933935	-0.187119	0.0299549	-0.107941	0.141105	-0.127916	0.480775	-0.588988	-0.180427	0.181522	0.249922	-0.0896939	0.0696489
58.8999	-0.14758	-0.254945	-0.0913469	-0.195922	0.0260526	-0.103421	0.153768	-0.124606	0.483122	-0.608641	-0.150155	0.162446	0.250765	-0.0892355	0.0601121
59	-0.152729	-0.243514	-0.0915682	-0.205088	0.0199797	-0.0979295	0.167974	-0.12204	0.480969	-0.627205	-0.117971	0.141314	0.250167	-0.0892458	0.0491124
59.1001	-0.157437	-0.232162	-0.0938208	-0.214528	0.0119031	-0.091248	0.183511	-0.120109	0.474412	-0.644532	-0.0847108	0.118122	0.248127	-0.0897011	0.0366784
59.2002	-0.161742	-0.22116	-0.0977289	-0.224062	0.0020385	-0.0831969	0.200114	-0.118716	0.463596	-0.660498	-0.0511723	0.0928821	0.244776	-0.0905055	0.022978
59.2998	-0.165683	-0.210697	-0.102844	-0.233482	-0.00934821	-0.0736123	0.217374	-0.117715	0.448769	-0.675037	-0.0181946	0.065599	0.240302	-0.0915139	0.0081941
59.3999	-0.169255	-0.200984	-0.108612	-0.242554	-0.0219318	-0.0624277	0.23487	-0.116946	0.430186	-0.688073	0.0134063	0.0363018	0.235016	-0.0925663	-0.00746142
59.5	-0.172447	-0.19217	-0.114426	-0.251031	-0.0354101	-0.0495949	0.252103	-0.116275	0.408189	-0.699614	0.0429108	0.00499993	0.229254	-0.0934787	-0.0237425
59.6001	-0.175209	-0.184405	-0.11965	-0.258694	-0.0494375	-0.0351657	0.268583	-0.115516	0.383153	-0.709701	0.069661	-0.0282666	0.22343	-0.0940771	-0.0403632
59.7002	-0.177461	-0.177795	-0.123724	-0.26529	-0.0636423	-0.0192144	0.28382	-0.114514	0.355492	-0.718341	0.0931382	-0.0634213	0.217971	-0.0941548	-0.0569934
59.7998	-0.179116	-0.172408	-0.126112	-0.27063	-0.0776497	-0.0019203	0.297321	-0.113126	0.325618	-0.725557	0.112871	-0.100327	0.213301	-0.0935248	-0.0733393
59.8999	-0.180062	-0.168305	-0.126429	-0.274572	-0.0911173	0.0165028	0.30858	-0.11125	0.293954	-0.731334	0.128565	-0.138768	0.2098	-0.0919908	-0.0891246
60	-0.180188	-0.165473	-0.12435	-0.277061	-0.103734	0.0357786	0.317236	-0.108844	0.260919	-0.735658	0.140055	-0.178491	0.207796	-0.0894567	-0.104069
60.1001	-0.179371	-0.163897	-0.119715	-0.278081	-0.115197	0.0555655	0.322948	-0.105876	0.2269	-0.738493	0.147325	-0.219206	0.207551	-0.0858856	-0.117884
60.2002	-0.177509	-0.163487	-0.112499	-0.277695	-0.125207	0.0754936	0.325464	-0.102372	0.192244	-0.739805	0.15047	-0.260492	0.209161	-0.081315	-0.130367
60.2998	-0.174518	-0.164151	-0.102884	-0.276035	-0.133484	0.0951719	0.324653	-0.0983484	0.157314	-0.739502	0.149726	-0.301903	0.212736	-0.075829	-0.141325
60.3999	-0.17032	-0.165783	-0.09112	-0.27331	-0.139807	0.114175	0.320478	-0.0938438	0.12244	-0.737461	0.145415	-0.3429	0.218219	-0.0696048	-0.150595
60.5	-0.164874	-0.168201	-0.0776522	-0.269753	-0.143959	0.132114	0.312999	-0.0889463	0.0879444	-0.733554	0.137953	-0.382867	0.225453	-0.0628916	-0.158054
60.6001	-0.158159	-0.17127	-0.0629427	-0.265665	-0.14579	0.148597	0.302421	-0.0837488	0.0540837	-0.727639	0.127855	-0.421171	0.23416	-0.0560113	-0.163595
60.7002	-0.150187	-0.174769	-0.0476133	-0.261369	-0.14518	0.16328	0.288999	-0.0783425	0.0210872	-0.719572	0.115679	-0.457089	0.244046	-0.0493179	-0.167158
60.7998	-0.141012	-0.178503	-0.0323088	-0.257208	-0.142047	0.17583	0.273065	-0.072809	-0.0108623	-0.709205	0.101993	-0.489867	0.254677	-0.0432348	-0.168743
60.8999	-0.130724	-0.182252	-0.0176699	-0.253537	-0.136377	0.185997	0.255039	-0.0671928	-0.0415777	-0.696435	0.0873598	-0.51883	0.265669	-0.0381283	-0.168363
61	-0.119424	-0.185783	-0.00428028	-0.250627	-0.128227	0.193552	0.235367	-0.0615592	-0.0709027	-0.681152	0.0723791	-0.543348	0.276498	-0.0344154	-0.166086
61.1001	-0.107251	-0.188871	0.00734119	-0.248788	-0.11771	0.198356	0.214554	-0.0559096	-0.0987381	-0.66327	0.0576407	-0.562866	0.286719	-0.0324523	-0.162029
61.2002	-0.0943606	-0.191297	0.0167501	-0.248249	-0.105012	0.200319	0.193145	-0.0502363	-0.125032	-0.642735	0.0437224	-0.576931	0.295951	-0.0326253	-0.156315
61.2998	-0.0809286	-0.192838	0.0236395	-0.249238	-0.0903574	0.199379	0.171598	-0.0444758	-0.14969	-0.619609	0.0311527	-0.585209	0.30378	-0.0352207	-0.149063
61.3999	-0.0671385	-0.193307	0.0278166	-0.251877	-0.0740513	0.195576	0.150442	-0.0385459	-0.172677	-0.593991	0.0203952	-0.587512	0.309957	-0.0404787	-0.14047
61.5	-0.0531778	-0.19254	0.0292032	-0.256217	-0.0564369	0.188963	0.130095	-0.0323806	-0.194	-0.565996	0.0118271	-0.583783	0.314226	-0.048538	-0.130699
61.6001	-0.0392496	-0.190417	0.0278681	-0.262287	-0.0379508	0.179684	0.11096	-0.0259037	-0.213699	-0.535827	0.00578617	-0.574198	0.316538	-0.0595485	-0.119976
61.7002	-0.0255374	-0.186881	0.0240057	-0.270059	-0.0190125	0.167902	0.0933683	-0.0190502	-0.231885	-0.503781	0.00252809	-0.559027	0.316822	-0.073506	-0.108471
61.7998	-0.0122565	-0.181943	0.0179193	-0.27945	-0.000101013	0.153844	0.0775546	-0.0117757	-0.248679	-0.47016	0.00219969	-0.538701	0.315146	-0.0903455	-0.0963992
61.8999	0.000428904	-0.175662	0.00995998	-0.290229	0.018286	0.137763	0.0637322	-0.00404095	-0.264202	-0.435339	0.00491193	-0.513785	0.311678	-0.10989	-0.0839118
62	0.012343	-0.168099	0.000531958	-0.302147	0.0356505	0.119941	0.0520193	0.00413039	-0.278617	-0.399737	0.0106356	-0.484937	0.306709	-0.131863	-0.0711383
62.1001	0.0233495	-0.159461	-0.00991268	-0.31491	0.051516	0.100673	0.0424312	0.0127011	-0.292062	-0.363777	0.019287	-0.452934	0.300548	-0.155975	-0.0581855
62.2002	0.0333336	-0.149928	-0.0209372	-0.328245	0.065498	0.0802775	0.0349768	0.0215697	-0.304699	-0.327909	0.0306678	-0.418566	0.293546	-0.181876	-0.0450991
62.2998	0.0421807	-0.139773	-0.0320704	-0.341849	0.0772731	0.0590564	0.0295906	0.0305903	-0.316711	-0.292584	0.0445243	-0.382643	0.286061	-0.209157	-0.0319556
62.3999	0.0498299	-0.129284	-0.0429937	-0.355381	0.0865487	0.0373279	0.0261938	0.0396016	-0.328235	-0.258236	0.0605518	-0.345977	0.278502	-0.237375	-0.0187148
62.5	0.0562337	-0.118767	-0.0533602	-0.368493	0.0931443	0.0154412	0.0246223	0.048388	-0.339448	-0.225297	0.0784157	-0.309318	0.271244	-0.266047	-0.00536906
62.6001	0.0614018	-0.108563	-0.062895	-0.380871	0.0969249	-0.00628526	0.0246854	0.056727	-0.350462	-0.19413	0.0976834	-0.273409	0.264664	-0.294636	0.00820173
62.7002	0.0653442	-0.0989707	-0.0713999	-0.392226	0.0978434	-0.0275158	0.0261822	0.0643744	-0.361328	-0.165086	0.117916	-0.238859	0.259095	-0.322635	0.0220682
62.7998	0.068129	-0.0902865	-0.0786898	-0.402273	0.0959334	-0.0479777	0.028927	0.0710881	-0.372096	-0.138427	0.138633	-0.206151	0.25476	-0.349509	0.0363103
62.8999	0.0698498	-0.0827767	-0.0847075	-0.410775	0.0912758	-0.0673831	0.0327056	0.0766537	-0.382767	-0.114356	0.159399	-0.175691	0.251825	-0.374724	0.0510789
63	0.0706272	-0.0766179	-0.0894281	-0.417654	0.0840374	-0.0855009	0.037333	0.080874	-0.393303	-0.0930459	0.179754	-0.147731	0.250386	-0.397737	0.0664388
63.1001	0.070615	-0.0719926	-0.0928652	-0.422896	0.0744255	-0.102118	0.0426241	0.0836492	-0.4036	-0.0745592	0.199241	-0.122459	0.250452	-0.417987	0.0824815
63.2002	0.0699787	-0.0689485	-0.0950853	-0.42658	0.0627164	-0.117039	0.0484487	0.084845	-0.413526	-0.0589163	0.217467	-0.0999376	0.251981	-0.434965	0.0991594
63.2998	0.068898	-0.0675257	-0.0961725	-0.428783	0.049182	-0.130121	0.0546973	0.0844186	-0.422923	-0.0460314	0.234057	-0.080174	0.254882	-0.448229	0.116459
63.3999	0.0675495	-0.0676548	-0.0962622	-0.429691	0.0340674	-0.141254	0.0612759	0.0824135	-0.43162	-0.0357809	0.24868	-0.0631074	0.258941	-0.457422	0.13427
63.5	0.0661213	-0.069217	-0.0954687	-0.429558	0.0176719	-0.1504	0.0681006	0.0788642	-0.439405	-0.027981	0.261087	-0.0486348	0.263873	-0.462234	0.152477
63.6001	0.064785	-0.0720284	-0.0939314	-0.428768	0.000247436	-0.15752	0.0751121	0.0739585	-0.446109	-0.022365	0.271078	-0.0366114	0.269417	-0.462385	0.170879
63.7002	0.0637004	-0.075868	-0.0917894	-0.42767	-0.017958	-0.162628	0.0822528	0.0678487	-0.451544	-0.0186526	0.278518	-0.026911	0.275211	-0.45773	0.189217
63.7998	0.0630053	-0.0804761	-0.0891535	-0.426676	-0.0366757	-0.16578	0.0894742	0.0607508	-0.455532	-0.0165194	0.283355	-0.0194117	0.280942	-0.4482	0.207173
63.8999	0.0627933	-0.0855587	-0.0861132	-0.426191	-0.0557166	-0.167064	0.0967776	0.0529321	-0.457931	-0.0156321	0.285592	-0.0140562	0.286307	-0.433872	0.224438
64	0.0631473	-0.090823	-0.0827848	-0.426605	-0.0749054	-0.166589	0.10411	0.0446473	-0.458598	-0.0156219	0.285288	-0.0108255	0.290975	-0.414954	0.240654
64.1001	0.0640979	-0.0959805	-0.079262	-0.428304	-0.0940636	-0.164496	0.111464	0.0361887	-0.457444	-0.0161399	0.282568	-0.00969491	0.294669	-0.391764	0.25552
64.2002	0.0656657	-0.100732	-0.0756342	-0.431595	-0.113052	-0.16095	0.11876	0.0277944	-0.45441	-0.0168182	0.277578	-0.0107348	0.297155	-0.364692	0.268673
64.2998	0.0678	-0.104808	-0.0719683	-0.436702	-0.131691	-0.15614	0.125964	0.0197175	-0.449495	-0.0173343	0.27057	-0.0139929	0.298191	-0.334271	0.279842
64.3999	0.070455	-0.107991	-0.0683004	-0.443762	-0.149843	-0.150222	0.133027	0.0122069	-0.442742	-0.0173931	0.261804	-0.0195436	0.297671	-0.30111	0.288754
64.5	0.07354	-0.110104	-0.064728	-0.452771	-0.167326	-0.14337	0.139884	0.00544607	-0.434239	-0.016761	0.251567	-0.02745	0.29549	-0.265962	0.295193
64.6001	0.0769591	-0.111027	-0.0612776	-0.463678	-0.183966	-0.135762	0.146485	-0.000387547	-0.424137	-0.0152706	0.240166	-0.0377616	0.291632	-0.229619	0.299
64.7002	0.0805978	-0.110665	-0.0580198	-0.476222	-0.199635	-0.127558	0.152791	-0.0052061	-0.412591	-0.012777	0.227902	-0.0504935	0.286103	-0.192913	0.300064
64.7998	0.0843336	-0.108977	-0.0549929	-0.490084	-0.214157	-0.118885	0.158698	-0.00892846	-0.399762	-0.00923427	0.215084	-0.0655695	0.27901	-0.156688	0.298332
64.8999	0.0880411	-0.105959	-0.0522387	-0.504848	-0.22736	-0.109873	0.164178	-0.0115244	-0.385902	-0.00462573	0.201963	-0.0828829	0.270452	-0.121838	0.29382
65	0.0916208	-0.101686	-0.0497896	-0.520042	-0.239058	-0.100613	0.169181	-0.0130399	-0.371234	0.000959735	0.188791	-0.10225	0.260584	-0.0892406	0.286579
65.1001	0.0949877	-0.0962256	-0.0477011	-0.535142	-0.249072	-0.0911826	0.173675	-0.0135153	-0.356061	0.00739206	0.175752	-0.123388	0.249581	-0.0597068	0.276764
65.2002	0.0980783	-0.089735	-0.0459921	-0.549526	-0.257239	-0.0816361	0.177632	-0.0130715	-0.340622	0.0144328	0.163054	-0.145973	0.237647	-0.0339742	0.264523
65.2998	0.10085	-0.0823459	-0.0446798	-0.56256	-0.263431	-0.0719619	0.181081	-0.0117914	-0.325176	0.0218589	0.150761	-0.1696	0.225033	-0.0126877	0.250042
65.3999	0.103279	-0.0742639	-0.0437586	-0.573656	-0.267516	-0.0621353	0.184037	-0.00978151	-0.309984	0.0293952	0.138955	-0.193822	0.211983	0.00361879	0.233559
65.5	0.105396	-0.0657057	-0.0432474	-0.58228	-0.269434	-0.0520987	0.18654	-0.00720392	-0.295287	0.036745	0.127608	-0.218196	0.198784	0.0145319	0.21537
65.6001	0.107221	-0.0568537	-0.0431273	-0.587959	-0.269188	-0.0418313	0.188632	-0.00419745	-0.281332	0.0435759	0.116671	-0.242226	0.185658	0.0197624	0.195763
65.7002	0.108823	-0.0479579	-0.0433867	-0.590356	-0.266822	-0.0312148	0.190396	-0.000914034	-0.268333	0.0495791	0.106052	-0.265465	0.172905	0.0192231	0.175076
65.7998	0.110255	-0.0391841	-0.0440352	-0.589191	-0.262453	-0.0201845	0.191869	0.00252045	-0.256452	0.0544684	0.0955994	-0.287503	0.160813	0.0129542	0.153603
65.8999	0.111604	-0.0307683	-0.0450098	-0.584363	-0.256225	-0.00863745	0.193118	0.0059594	-0.24585	0.0579878	0.0851567	-0.307958	0.149656	0.0012417	0.131706
66	0.112938	-0.0228357	-0.046261	-0.575863	-0.248339	0.00353539	0.194187	0.00925461	-0.236639	0.0599112	0.0745172	-0.326515	0.139651	-0.0155208	0.109757
66.1001	0.114318	-0.0155859	-0.047682	-0.563786	-0.239051	0.0163949	0.1951	0.0122944	-0.22895	0.0600969	0.0635114	-0.342981	0.131011	-0.036749	0.0880853
66.2002	0.115809	-0.00911998	-0.0492022	-0.548361	-0.22866	0.0299887	0.195891	0.0149561	-0.22284	0.0584154	0.0519411	-0.357243	0.12396	-0.0617386	0.067032
66.2998	0.117434	-0.00354101	-0.0506918	-0.529948	-0.217523	0.0443225	0.196563	0.0171951	-0.218325	0.0548017	0.039667	-0.369221	0.118699	-0.089633	0.0469323
66.3999	0.119212	0.00110012	-0.0520765	-0.508904	-0.205994	0.0594173	0.197093	0.018958	-0.215404	0.0492536	0.0265273	-0.378974	0.11541	-0.11941	0.0280477
66.5	0.12114	0.00476793	-0.0532038	-0.485722	-0.19444	0.0752045	0.197448	0.0201956	-0.214065	0.0418138	0.012403	-0.386596	0.114193	-0.150003	0.0106603
66.6001	0.123184	0.00745154	-0.053961	-0.460922	-0.183203	0.0915983	0.197548	0.0208966	-0.214248	0.0325505	-0.00274548	-0.392212	0.115172	-0.18032	-0.00503146
66.7002	0.125303	0.00920627	-0.054207	-0.435008	-0.172603	0.108465	0.197293	0.0210572	-0.215872	0.0216203	-0.0189888	-0.39601	0.118381	-0.209271	-0.0188445
66.7998	0.127423	0.010097	-0.0538256	-0.408501	-0.162931	0.125591	0.196632	0.0207018	-0.218859	0.00915458	-0.0363136	-0.398204	0.12383	-0.235765	-0.0306243
66.8999	0.129473	0.0101929	-0.052685	-0.38182	-0.154452	0.142746	0.195419	0.0199041	-0.223039	-0.00466568	-0.0546871	-0.399041	0.131517	-0.258798	-0.0402964
67	0.131379	0.00962448	-0.0506308	-0.355411	-0.147401	0.159636	0.193607	0.0187451	-0.228293	-0.019672	-0.074005	-0.398685	0.14135	-0.277494	-0.0478209
67.1001	0.133066	0.00849339	-0.0475618	-0.329569	-0.141968	0.175978	0.191105	0.0173637	-0.234471	-0.0357158	-0.0941317	-0.397287	0.15322	-0.291078	-0.0532302
67.2002	0.134464	0.00692362	-0.0433962	-0.304584	-0.13825	0.191432	0.18786	0.015874	-0.241399	-0.0525951	-0.114928	-0.394944	0.166972	-0.299014	-0.0565623
67.2998	0.135517	0.00504485	-0.0380976	-0.280616	-0.136303	0.205657	0.183805	0.0144257	-0.24895	-0.070182	-0.13625	-0.391766	0.182446	-0.300903	-0.0579661
67.3999	0.136179	0.00294542	-0.0316374	-0.257776	-0.136099	0.21832	0.178932	0.0132126	-0.256903	-0.0883186	-0.157924	-0.387817	0.199414	-0.296585	-0.0575198
67.5	0.136455	0.000734772	-0.0240461	-0.236052	-0.137584	0.229096	0.173248	0.0123908	-0.265089	-0.10685	-0.179763	-0.383085	0.217601	-0.286112	-0.055374
67.6001	0.136345	-0.00150258	-0.0154058	-0.215419	-0.140661	0.237697	0.166782	0.0121309	-0.273332	-0.12561	-0.201568	-0.377518	0.236738	-0.26972	-0.0516375
67.7002	0.135877	-0.00369415	-0.00583096	-0.195794	-0.145236	0.243905	0.159585	0.0125915	-0.28144	-0.144434	-0.223167	-0.371056	0.256457	-0.247888	-0.0464266
67.7998	0.135118	-0.00581324	0.00456219	-0.177063	-0.151147	0.247499	0.151771	0.0139403	-0.289238	-0.163147	-0.244368	-0.363587	0.276425	-0.221286	-0.0398787
67.8999	0.134139	-0.00783257	0.0155962	-0.15911	-0.158162	0.248382	0.143444	0.0163559	-0.296535	-0.18159	-0.264931	-0.354995	0.296246	-0.190718	-0.0321387
68	0.133038	-0.0098067	0.0270536	-0.141803	-0.166024	0.246511	0.134737	0.0199248	-0.30318	-0.199614	-0.284713	-0.345142	0.31557	-0.157075	-0.023363
68.1001	0.131921	-0.0117904	0.0387209	-0.125025	-0.174448	0.24192	0.125788	0.0247566	-0.308982	-0.217014	-0.303523	-0.333956	0.334034	-0.121342	-0.0136927
68.2002	0.130887	-0.0138828	0.0503138	-0.108686	-0.183172	0.234712	0.116745	0.03083	-0.313805	-0.233573	-0.321145	-0.321326	0.351232	-0.0845145	-0.00326716
68.2998	0.130041	-0.0161602	0.0616034	-0.0927094	-0.191925	0.225092	0.107754	0.038134	-0.317529	-0.249096	-0.337442	-0.307206	0.366852	-0.0476106	0.00779165
68.3999	0.129494	-0.0187422	0.0723207	-0.0770568	-0.200414	0.213331	0.0989456	0.0465726	-0.320008	-0.263374	-0.35223	-0.291577	0.380606	-0.0115917	0.0193178
68.5	0.129337	-0.0217444	0.0822084	-0.0617432	-0.208347	0.199753	0.0904599	0.056011	-0.321158	-0.276198	-0.36537	-0.274463	0.392224	0.022635	0.03113
68.6001	0.129639	-0.0252463	0.0910261	-0.0467449	-0.215423	0.184755	0.0824111	0.0663121	-0.32087	-0.287399	-0.376759	-0.255928	0.401535	0.0542842	0.0430566
68.7002	0.130454	-0.0293509	0.0986059	-0.0321128	-0.221325	0.168732	0.0749491	0.0772287	-0.319065	-0.296789	-0.386294	-0.2361	0.408451	0.0826641	0.0548993
68.7998	0.131822	-0.034106	0.104799	-0.0178373	-0.225809	0.152144	0.0681514	0.0885167	-0.31566	-0.304253	-0.393865	-0.215106	0.412954	0.10722	0.0664445
68.8999	0.133758	-0.0395413	0.109487	-0.00399484	-0.228636	0.135483	0.0621492	0.0998859	-0.310647	-0.309733	-0.399396	-0.193143	0.415112	0.127545	0.0774461
69	0.136248	-0.0456525	0.11261	0.00939422	-0.229625	0.119194	0.0570014	0.111019	-0.304003	-0.313199	-0.402895	-0.170354	0.415147	0.143375	0.0876962
69.1001	0.139268	-0.052416	0.114115	0.022283	-0.228648	0.103711	0.0527558	0.121611	-0.295723	-0.314664	-0.404396	-0.146936	0.413298	0.154536	0.0969354
69.2002	0.142751	-0.0597288	0.113949	0.0346969	-0.225599	0.0894553	0.0494499	0.131343	-0.285844	-0.314213	-0.404028	-0.123064	0.409855	0.161019	0.104954
69.2998	0.146627	-0.0674956	0.11211	0.0466797	-0.220438	0.0768059	0.0471097	0.139971	-0.274378	-0.311971	-0.401888	-0.0989101	0.405256	0.162923	0.111561
69.3999	0.1508	-0.0755688	0.108595	0.0582429	-0.213168	0.0660752	0.0457575	0.147265	-0.261415	-0.308144	-0.39812	-0.0746318	0.399887	0.160473	0.116566
69.5	0.155183	-0.0837952	0.103411	0.0694614	-0.203869	0.0575208	0.0454086	0.153026	-0.246984	-0.303015	-0.392909	-0.0503383	0.394158	0.153993	0.119843
69.6001	0.159662	-0.0919702	0.0965879	0.0803857	-0.192678	0.0513049	0.0460459	0.157118	-0.231143	-0.296895	-0.386447	-0.0260792	0.38855	0.143864	0.121292
69.7002	0.164112	-0.0998952	0.0881041	0.0911287	-0.179795	0.0475342	0.0476647	0.159424	-0.213961	-0.290119	-0.379005	-0.00191156	0.383401	0.130551	0.120899
69.7998	0.168405	-0.107347	0.0779779	0.101774	-0.165449	0.0462316	0.0502513	0.159917	-0.195465	-0.28306	-0.370796	0.0221226	0.379036	0.114556	0.118729
69.8999	0.172409	-0.114167	0.0662268	0.112361	-0.149916	0.0473646	0.0537933	0.15863	-0.175723	-0.27612	-0.362101	0.046027	0.375665	0.096336	0.114838
70	0.175992	-0.120206	0.0528715	0.12296	-0.133497	0.0508323	0.0582624	0.155594	-0.154782	-0.269686	-0.353167	0.0698304	0.373441	0.0764512	0.109326
70.1001	0.179033	-0.125322	0.037958	0.133581	-0.116577	0.0564763	0.0636432	0.150941	-0.132727	-0.264137	-0.344195	0.0936069	0.372372	0.0554251	0.102387
70.2002	0.181412	-0.129442	0.0215776	0.144268	-0.0995346	0.0640772	0.0698912	0.144829	-0.109613	-0.259841	-0.335355	0.117351	0.372425	0.0338192	0.0941964
70.2998	0.183036	-0.132503	0.00384311	0.155034	-0.0827202	0.0733852	0.07696	0.137404	-0.0854979	-0.257139	-0.326826	0.141074	0.373459	0.0120988	0.0849878
70.3999	0.183795	-0.134495	-0.0150606	0.165814	-0.0664789	0.0840644	0.0848585	0.128861	-0.0604787	-0.256282	-0.318778	0.164805	0.375277	-0.00923248	0.0750257
70.5	0.183615	-0.135409	-0.0349123	0.176517	-0.0511114	0.0957642	0.0935542	0.11936	-0.0346317	-0.257485	-0.311302	0.188525	0.377571	-0.0298154	0.0645753
70.6001	0.182431	-0.13531	-0.0554201	0.187043	-0.0369063	0.108113	0.10307	0.109083	-0.00806189	-0.260851	-0.304491	0.212143	0.379989	-0.0492908	0.0538789
70.7002	0.18019	-0.134244	-0.0762579	0.197269	-0.024104	0.120715	0.113406	0.0981629	0.0190974	-0.266376	-0.298392	0.235532	0.382223	-0.0673815	0.043234
70.7998	0.176854	-0.132277	-0.0969889	0.207098	-0.0128915	0.133212	0.124569	0.0867577	0.0467373	-0.274022	-0.293042	0.2585	0.383915	-0.083889	0.0328809
70.8999	0.172431	-0.129509	-0.117148	0.216373	-0.00336031	0.14518	0.136603	0.0749689	0.074669	-0.283634	-0.288514	0.280825	0.384774	-0.0987354	0.0230237
71	0.166935	-0.126038	-0.136223	0.224993	0.00443216	0.156249	0.149541	0.0628408	0.102748	-0.294933	-0.284812	0.302275	0.384542	-0.111853	0.0139104
71.1001	0.160416	-0.121952	-0.153692	0.232816	0.0105215	0.166013	0.163411	0.0504172	0.130729	-0.307547	-0.28194	0.322611	0.382923	-0.123304	0.00571073
71.2002	0.152932	-0.117361	-0.168982	0.239735	0.0150021	0.174121	0.178238	0.0377176	0.158365	-0.321022	-0.279869	0.341583	0.379801	-0.133174	-0.00138461
71.2998	0.144583	-0.11232	-0.181578	0.245607	0.0180549	0.180223	0.194041	0.0247655	0.185459	-0.33484	-0.278662	0.358857	0.37504	-0.14164	-0.00721156
71.3999	0.135488	-0.106922	-0.191002	0.250323	0.0198947	0.184022	0.210805	0.0115696	0.211781	-0.348446	-0.278359	0.374181	0.368615	-0.148857	-0.0117053
71.5	0.125775	-0.10123	-0.196835	0.253799	0.0207778	0.18525	0.228534	-0.00186269	0.237132	-0.361227	-0.279038	0.387301	0.360501	-0.155045	-0.0147647
71.6001	0.115598	-0.095291	-0.198775	0.255971	0.0209354	0.183709	0.247209	-0.0155198	0.26133	-0.372582	-0.28077	0.39802	0.350777	-0.160427	-0.0163878
71.7002	0.10512	-0.0891989	-0.196614	0.256805	0.0206342	0.179239	0.266759	-0.0293901	0.284199	-0.381916	-0.283634	0.406156	0.339512	-0.16521	-0.0165423
71.7998	0.0945005	-0.0829848	-0.190304	0.256251	0.0200707	0.171753	0.287087	-0.0433878	0.305646	-0.388704	-0.287733	0.411613	0.326793	-0.169595	-0.0152625
71.8999	0.0838975	-0.076753	-0.17992	0.254302	0.0194529	0.161247	0.308034	-0.0574064	0.325538	-0.392486	-0.293169	0.414357	0.312747	-0.173703	-0.012617
72	0.0734789	-0.0705198	-0.165667	0.250943	0.0189379	0.147777	0.32941	-0.071335	0.343802	-0.392937	-0.300047	0.414381	0.297549	-0.177612	-0.00870501
72.1001	0.063381	-0.0643762	-0.147911	0.246214	0.0185852	0.131534	0.350992	-0.0850011	0.360404	-0.389873	-0.308421	0.411785	0.281309	-0.18131	-0.00363719
72.2002	0.0537457	-0.0583624	-0.127169	0.240151	0.0183965	0.112747	0.372529	-0.0982201	0.375329	-0.383261	-0.318339	0.406698	0.264206	-0.184817	0.00239766
72.2998	0.0446648	-0.0525698	-0.104069	0.232791	0.0182594	0.0917493	0.393701	-0.110754	0.388609	-0.373247	-0.329871	0.399354	0.246444	-0.188045	0.00922406
72.3999	0.0362138	-0.0470513	-0.0793077	0.224251	0.0180087	0.068905	0.414191	-0.122367	0.40028	-0.360118	-0.342984	0.390059	0.228158	-0.190862	0.0166284
72.5	0.0284478	-0.0418366	-0.0536577	0.214639	0.0174298	0.0446703	0.433656	-0.132839	0.410403	-0.344353	-0.357625	0.379168	0.209556	-0.193094	0.0244161
72.6001	0.02137	-0.0369481	-0.0279276	0.204104	0.0162207	0.019524	0.451726	-0.141936	0.419046	-0.326563	-0.373625	0.367069	0.190842	-0.194568	0.0323602
72.7002	0.0149792	-0.032401	-0.00292607	0.19281	0.0140971	-0.0059981	0.468099	-0.149468	0.426281	-0.307504	-0.390795	0.354223	0.172273	-0.19513	0.0402528
72.7998	0.00922168	-0.0282297	0.0205744	0.180926	0.0107498	-0.0313523	0.482425	-0.155239	0.432158	-0.288048	-0.408875	0.341071	0.154165	-0.19458	0.0478822
72.8999	0.00403713	-0.0244202	0.0418776	0.168632	0.0058624	-0.0560144	0.494458	-0.159105	0.436734	-0.269093	-0.427514	0.328093	0.136775	-0.192775	0.0551015
73	-0.000670581	-0.0209374	0.0603426	0.156132	-0.000785661	-0.0794804	0.503902	-0.16099	0.44008	-0.251579	-0.446355	0.315731	0.120447	-0.189618	0.0618211
73.1001	-0.00499072	-0.0177712	0.0754736	0.143593	-0.00942102	-0.101287	0.510559	-0.160859	0.442234	-0.236418	-0.464954	0.304426	0.105528	-0.185085	0.0679571
73.2002	-0.00903934	-0.0148701	0.086931	0.131197	-0.0201535	-0.121055	0.514308	-0.158752	0.44327	-0.224464	-0.482877	0.294559	0.0923649	-0.179229	0.0734407
73.2998	-0.0129448	-0.012177	0.0945242	0.119129	-0.033007	-0.138446	0.515045	-0.154713	0.443263	-0.216491	-0.499632	0.286491	0.0812748	-0.172108	0.0782949
73.3999	-0.0168049	-0.00966065	0.0982531	0.107579	-0.0479566	-0.153216	0.512762	-0.148871	0.442266	-0.213126	-0.514774	0.28049	0.0726176	-0.163849	0.0825769
73.5	-0.0207329	-0.0072536	0.0982321	0.096668	-0.0648567	-0.165185	0.507566	-0.141416	0.440394	-0.214817	-0.52788	0.276699	0.066721	-0.15467	0.0863038
73.6001	-0.0248116	-0.00493239	0.0947187	0.0865523	-0.0835161	-0.174246	0.499592	-0.132554	0.437752	-0.221812	-0.538582	0.275181	0.0638267	-0.144785	0.0895921
73.7002	-0.0291211	-0.00267602	0.0881212	0.0773483	-0.103669	-0.18039	0.489053	-0.122558	0.434472	-0.234224	-0.546573	0.275947	0.0641636	-0.134498	0.0925447
73.7998	-0.0337399	-0.000484507	0.0789144	0.0691399	-0.124954	-0.183645	0.47619	-0.111665	0.430706	-0.251975	-0.551595	0.278871	0.067812	-0.124124	0.0953447
73.8999	-0.0387009	0.00162367	0.0676306	0.0620092	-0.146998	-0.184132	0.461332	-0.100146	0.426663	-0.274787	-0.553533	0.283772	0.0748625	-0.113948	0.0980874
74	-0.04404	0.00360729	0.054838	0.055991	-0.169389	-0.182016	0.444841	-0.0882831	0.422566	-0.302223	-0.552358	0.290388	0.0852981	-0.104303	0.100918
74.1001	-0.0497609	0.00544594	0.0410479	0.0511128	-0.191736	-0.177443	0.427111	-0.0763655	0.418649	-0.333734	-0.548193	0.298368	0.0990157	-0.0954962	0.10392
74.2002	-0.0558481	0.00706907	0.0267694	0.0474153	-0.213705	-0.170608	0.408533	-0.0647227	0.41515	-0.368607	-0.541212	0.307378	0.115832	-0.0878129	0.107178
74.2998	-0.0622999	0.00844614	0.0124605	0.0449614	-0.23496	-0.16175	0.389482	-0.0536202	0.412329	-0.406042	-0.531743	0.316991	0.135428	-0.0814876	0.110722
74.3999	-0.069082	0.00950719	-0.00152798	0.0437187	-0.25522	-0.151092	0.370311	-0.0433095	0.410392	-0.445207	-0.52011	0.326836	0.157436	-0.0767072	0.114571
74.5	-0.0761827	0.010211	-0.0149824	0.0436571	-0.274255	-0.138832	0.351335	-0.0340329	0.409542	-0.485285	-0.506759	0.336537	0.181374	-0.073618	0.118679
74.6001	-0.0835572	0.0105218	-0.0277826	0.0447223	-0.291892	-0.125196	0.332832	-0.026012	0.409914	-0.525457	-0.492168	0.345743	0.206802	-0.0723244	0.12294
74.7002	-0.0911821	0.0104436	-0.0399191	0.046867	-0.308013	-0.11036	0.315004	-0.0194646	0.411578	-0.564939	-0.476804	0.354173	0.233173	-0.0728827	0.12727
74.7998	-0.0990416	0.00996865	-0.0514853	0.0500531	-0.322531	-0.0944968	0.29797	-0.014561	0.414554	-0.602997	-0.461216	0.361606	0.259934	-0.0753274	0.131535
74.8999	-0.1071	0.00913761	-0.062649	0.0541815	-0.335444	-0.0777732	0.281778	-0.0114177	0.418737	-0.63899	-0.445824	0.367921	0.286497	-0.0796165	0.135532
75	-0.115344	0.00802559	-0.0736391	0.0591851	-0.346736	-0.0603228	0.266413	-0.0101595	0.424011	-0.672366	-0.431061	0.373038	0.312381	-0.0856959	0.139076
75.1001	-0.123758	0.00674573	-0.084696	0.0648881	-0.356425	-0.0423249	0.251784	-0.0108228	0.430136	-0.702708	-0.417233	0.376966	0.336926	-0.0934831	0.141953
75.2002	-0.13233	0.00537623	-0.0960924	0.0711423	-0.364572	-0.0239036	0.237745	-0.0134531	0.436811	-0.7297	-0.404588	0.3798	0.359716	-0.102832	0.143952
75.2998	-0.14106	0.00408302	-0.108059	0.0777761	-0.37122	-0.00519426	0.224127	-0.0179895	0.443664	-0.753119	-0.393236	0.381721	0.380186	-0.113578	0.144879
75.3999	-0.149921	0.0029983	-0.120783	0.0846177	-0.376435	0.0136503	0.210707	-0.0243753	0.45026	-0.772864	-0.383226	0.382943	0.397952	-0.125571	0.144531
75.5	-0.158898	0.00231353	-0.134369	0.0914613	-0.380217	0.0324722	0.19722	-0.032496	0.456128	-0.788915	-0.374464	0.383646	0.412661	-0.138614	0.142708
75.6001	-0.167961	0.00216473	-0.148815	0.0981485	-0.382557	0.0511109	0.183426	-0.0421763	0.460807	-0.801347	-0.366791	0.384065	0.423978	-0.152491	0.139237
75.7002	-0.177066	0.00267205	-0.164	0.104483	-0.383433	0.0694178	0.169107	-0.0532361	0.463833	-0.81031	-0.359931	0.384391	0.431761	-0.166968	0.13401
75.7998	-0.186171	0.00397856	-0.179762	0.110306	-0.382814	0.0872249	0.1541	-0.0654405	0.464829	-0.815999	-0.353566	0.384851	0.435811	-0.181739	0.126911
75.8999	-0.195182	0.00617829	-0.195811	0.115509	-0.380696	0.104374	0.138293	-0.078542	0.463431	-0.818652	-0.347289	0.385621	0.436101	-0.196544	0.117947
76	-0.203997	0.00937307	-0.211767	0.119957	-0.37707	0.120714	0.121683	-0.0922508	0.459373	-0.81851	-0.340654	0.386868	0.432583	-0.211098	0.107082
76.1001	-0.21248	0.0136455	-0.227205	0.123558	-0.371897	0.136076	0.104298	-0.106299	0.452507	-0.815868	-0.333217	0.388633	0.425326	-0.225185	0.0944024
76.2002	-0.220477	0.0189956	-0.241673	0.12623	-0.365131	0.150328	0.0862484	-0.120412	0.442778	-0.811043	-0.324589	0.390899	0.414427	-0.238517	0.080002
76.2998	-0.227824	0.0253947	-0.25469	0.127888	-0.35671	0.1633	0.0676863	-0.134329	0.430225	-0.804352	-0.314381	0.393525	0.400072	-0.25083	0.0640146
76.3999	-0.234341	0.0327805	-0.265799	0.128464	-0.346661	0.17488	0.0488513	-0.147763	0.414997	-0.7961	-0.302265	0.396372	0.38252	-0.26189	0.0466214
76.5	-0.239842	0.0410622	-0.274601	0.127905	-0.335076	0.184937	0.0300202	-0.160521	0.397366	-0.786589	-0.287985	0.399193	0.362039	-0.271481	0.0280801
76.6001	-0.244123	0.0501144	-0.280773	0.126185	-0.322094	0.193415	0.0115077	-0.17237	0.377667	-0.776109	-0.271361	0.401706	0.338985	-0.279444	0.00864232
76.7002	-0.247009	0.0598133	-0.284111	0.123308	-0.307888	0.200253	-0.00633031	-0.183127	0.356336	-0.764941	-0.25233	0.403632	0.313737	-0.285663	-0.0113677
76.7998	-0.24834	0.0699527	-0.284527	0.119274	-0.29262	0.20543	-0.0231759	-0.192641	0.333828	-0.753349	-0.230953	0.404626	0.286716	-0.290086	-0.0315665
76.8999	-0.247982	0.0803827	-0.282076	0.114102	-0.276529	0.208934	-0.0386863	-0.200769	0.310637	-0.74159	-0.20735	0.404393	0.258417	-0.292706	-0.0515765
77	-0.245847	0.090915	-0.276867	0.107758	-0.25987	0.210809	-0.0525697	-0.207456	0.287242	-0.729953	-0.181767	0.402615	0.2293	-0.293549	-0.0709838
77.1001	-0.241883	0.101342	-0.269177	0.10022	-0.24295	0.211097	-0.064584	-0.212602	0.264097	-0.718664	-0.154492	0.399015	0.19986	-0.292677	-0.0893611
77.2002	-0.236097	0.11148	-0.259371	0.0914289	-0.22609	0.209869	-0.0745846	-0.216209	0.241634	-0.707948	-0.125872	0.393407	0.170579	-0.290233	-0.106317
77.2998	-0.228556	0.121127	-0.247912	0.0813676	-0.209608	0.207212	-0.0825	-0.218288	0.220175	-0.697993	-0.0963126	0.385682	0.141943	-0.286395	-0.121439
77.3999	-0.219368	0.130134	-0.235327	0.0700379	-0.193841	0.20327	-0.0883573	-0.218868	0.199986	-0.688952	-0.0662299	0.375792	0.114381	-0.281378	-0.134426
77.5	-0.20872	0.138359	-0.222201	0.057417	-0.179036	0.198162	-0.0922214	-0.218039	0.181219	-0.680997	-0.0360808	0.36377	0.0882397	-0.275432	-0.144966
77.6001	-0.196821	0.145622	-0.209118	0.043459	-0.16541	0.19211	-0.094287	-0.215875	0.163929	-0.674214	-0.00620635	0.349741	0.063937	-0.26879	-0.152798
77.7002	-0.18394	0.151806	-0.196688	0.0280801	-0.153156	0.185276	-0.0947795	-0.212529	0.148099	-0.668686	0.0230444	0.333925	0.0416351	-0.261717	-0.157726
77.7998	-0.170382	0.156818	-0.185444	0.0112554	-0.142366	0.177862	-0.0940412	-0.208121	0.133636	-0.664441	0.0513644	0.316606	0.0215399	-0.254488	-0.159662
77.8999	-0.156467	0.160576	-0.175938	-0.00703992	-0.133092	0.170082	-0.0924408	-0.202833	0.120313	-0.661418	0.0785403	0.298104	0.00374504	-0.247337	-0.158594
78	-0.142528	0.163014	-0.168608	-0.0268382	-0.125264	0.162115	-0.0903807	-0.196887	0.107838	-0.659523	0.104406	0.278727	-0.0117448	-0.240509	-0.154552
78.1001	-0.128894	0.164118	-0.163805	-0.0481509	-0.118757	0.154164	-0.0882863	-0.19047	0.0958907	-0.65862	0.128899	0.258823	-0.0250307	-0.234182	-0.147695
78.2002	-0.115884	0.163889	-0.161808	-0.0709838	-0.113374	0.146414	-0.0865491	-0.183836	0.0841249	-0.658524	0.151972	0.238696	-0.0362976	-0.228518	-0.138229
78.2998	-0.103794	0.162356	-0.162749	-0.0952872	-0.1089	0.139065	-0.0855572	-0.17716	0.072193	-0.659	0.173626	0.218636	-0.0458163	-0.223654	-0.126446
78.3999	-0.0928446	0.159568	-0.16671	-0.120966	-0.105063	0.13227	-0.0856238	-0.170639	0.0597118	-0.659764	0.193945	0.198845	-0.0539002	-0.219723	-0.112699
78.5	-0.0832518	0.1556	-0.173672	-0.147875	-0.101561	0.126189	-0.0870275	-0.164435	0.0463265	-0.660506	0.213009	0.179484	-0.0609014	-0.216759	-0.0974044
78.6001	-0.0751421	0.150532	-0.183537	-0.175823	-0.098078	0.120929	-0.0899398	-0.158666	0.0317453	-0.660865	0.230907	0.160677	-0.0671898	-0.214853	-0.0809916
78.7002	-0.0686034	0.144488	-0.196171	-0.204586	-0.0942784	0.116592	-0.0944969	-0.153439	0.0157013	-0.660493	0.247737	0.142499	-0.0731769	-0.213951	-0.0639304
78.7998	-0.0636615	0.137562	-0.21135	-0.233852	-0.0898799	0.113271	-0.10074	-0.148823	-0.00198507	-0.659056	0.263529	0.12493	-0.0791905	-0.214038	-0.0466746
78.8999	-0.0602744	0.129913	-0.228787	-0.263267	-0.0846593	0.110988	-0.108657	-0.144803	-0.021388	-0.656213	0.278317	0.107956	-0.0855139	-0.215023	-0.0296572
79	-0.0583563	0.121675	-0.248184	-0.292383	-0.0784337	0.109767	-0.118085	-0.141354	-0.0425153	-0.651704	0.292059	0.0914346	-0.0924042	-0.216817	-0.0132979
79.1001	-0.0577586	0.113025	-0.269173	-0.320749	-0.0710817	0.109592	-0.128836	-0.138394	-0.065258	-0.645289	0.304686	0.0752846	-0.0999649	-0.219267	0.00199903
79.2002	-0.0582969	0.104087	-0.291416	-0.3479	-0.0625547	0.110403	-0.140657	-0.13584	-0.0894311	-0.636768	0.316129	0.0594228	-0.10826	-0.222223	0.015915
79.2998	-0.0597789	0.0950042	-0.31452	-0.37339	-0.0528366	0.112114	-0.153237	-0.13358	-0.114753	-0.626042	0.326267	0.0437554	-0.117201	-0.225547	0.028185
79.3999	-0.0619815	0.0858685	-0.338099	-0.396717	-0.0420399	0.114624	-0.166236	-0.131438	-0.140877	-0.613037	0.334926	0.0282102	-0.126651	-0.229096	0.0385915
79.5	-0.0646732	0.0768048	-0.361742	-0.417425	-0.0303183	0.117783	-0.179289	-0.129312	-0.167387	-0.597713	0.341964	0.0127164	-0.136309	-0.23266	0.0470182
79.6001	-0.0676181	0.0678745	-0.385031	-0.435123	-0.0178574	0.121414	-0.192028	-0.127033	-0.193843	-0.580132	0.34717	-0.00273358	-0.145843	-0.23607	0.0534097
79.7002	-0.0705914	0.0591293	-0.407555	-0.449486	-0.0049235	0.125376	-0.204064	-0.124515	-0.219739	-0.560442	0.350367	-0.0180862	-0.154732	-0.239134	0.0577642
79.7998	-0.0734207	0.0505863	-0.428908	-0.460277	0.00821734	0.129464	-0.215041	-0.121677	-0.244576	-0.538798	0.351372	-0.0333396	-0.162523	-0.241692	0.0601255
79.8999	-0.0759235	0.0422117	-0.44863	-0.467285	0.0212418	0.133482	-0.224618	-0.118459	-0.267873	-0.515444	0.350076	-0.0484233	-0.168623	-0.243619	0.0606595
80	-0.0779716	0.0339604	-0.466347	-0.4704	0.0337979	0.137225	-0.23247	-0.114843	-0.289205	-0.490667	0.346401	-0.0632323	-0.172496	-0.244786	0.0595266
80.1001	-0.0794529	0.0257474	-0.481653	-0.469608	0.0455731	0.140496	-0.238285	-0.110824	-0.308201	-0.464747	0.340304	-0.0777038	-0.173509	-0.245098	0.0569345
80.2002	-0.0803113	0.0174713	-0.494179	-0.464977	0.0562878	0.143105	-0.241856	-0.106464	-0.324591	-0.438044	0.331788	-0.091727	-0.171216	-0.244475	0.053156
80.2998	-0.0805165	0.00904465	-0.50358	-0.456644	0.0656788	0.1449	-0.242957	-0.101803	-0.338157	-0.410909	0.320952	-0.10523	-0.165116	-0.242854	0.0485383
80.3999	-0.0800778	0.000330538	-0.509566	-0.444864	0.0735134	0.145718	-0.24145	-0.0969106	-0.348798	-0.383718	0.307938	-0.118158	-0.154868	-0.240225	0.0433751
80.5	-0.0790337	-0.00879615	-0.511891	-0.42993	0.0796035	0.145436	-0.237187	-0.0918783	-0.356537	-0.356875	0.292967	-0.130485	-0.140141	-0.236583	0.0380021
80.6001	-0.0774479	-0.0184683	-0.510388	-0.412208	0.0838065	0.143951	-0.230112	-0.0867676	-0.361477	-0.330757	0.27626	-0.142189	-0.120831	-0.231943	0.0327493
80.7002	-0.0753873	-0.0288005	-0.504912	-0.392084	0.0860087	0.141185	-0.220183	-0.0816283	-0.363843	-0.305718	0.258142	-0.153268	-0.0969486	-0.226371	0.0279542
80.7998	-0.0729638	-0.0398803	-0.495487	-0.369984	0.0861872	0.137123	-0.207438	-0.0764967	-0.363917	-0.28211	0.23898	-0.16373	-0.0686062	-0.219922	0.0238839
80.8999	-0.070284	-0.0517587	-0.482187	-0.346374	0.0843573	0.131761	-0.191923	-0.071356	-0.362044	-0.260242	0.219159	-0.173639	-0.0360812	-0.2127	0.020794
81	-0.0674619	-0.0644674	-0.465161	-0.321735	0.080595	0.125143	-0.173737	-0.0661858	-0.358639	-0.240363	0.199113	-0.183073	0.000276377	-0.204805	0.0189115
81.1001	-0.0646142	-0.0779982	-0.444676	-0.296608	0.0750105	0.117357	-0.153004	-0.0608905	-0.354104	-0.222691	0.179253	-0.192074	0.039909	-0.196362	0.0183946
81.2002	-0.0618357	-0.0922995	-0.421078	-0.271492	0.0677665	0.108536	-0.129876	-0.0553751	-0.348925	-0.20738	0.160025	-0.200709	0.0822688	-0.187491	0.0193712
81.2998	-0.0592317	-0.107289	-0.394814	-0.246937	0.0590206	0.0988197	-0.104578	-0.049533	-0.343498	-0.19455	0.141891	-0.209031	0.126615	-0.178302	0.0219041
81.3999	-0.0568822	-0.122822	-0.366305	-0.223472	0.0489814	0.0884094	-0.0773603	-0.0432264	-0.338211	-0.184235	0.12533	-0.217096	0.172169	-0.168962	0.0260412
81.5	-0.0548627	-0.138739	-0.336096	-0.201578	0.0378615	0.0775281	-0.048481	-0.0363444	-0.333375	-0.176437	0.110736	-0.224895	0.218095	-0.159641	0.0317327
81.6001	-0.0532247	-0.154797	-0.304747	-0.181787	0.0259169	0.0663855	-0.0182494	-0.0287398	-0.329247	-0.171082	0.0984925	-0.232441	0.263588	-0.150508	0.0388719
81.7002	-0.0519961	-0.17079	-0.272831	-0.164549	0.0133715	0.0552677	0.0130498	-0.020328	-0.325996	-0.168024	0.0889574	-0.239707	0.307831	-0.141721	0.0472528
81.7998	-0.0511828	-0.186375	-0.240919	-0.15031	0.000416006	0.0444074	0.0450781	-0.0110441	-0.323715	-0.167066	0.082329	-0.246638	0.350086	-0.133471	0.0566465
81.8999	-0.0507658	-0.201269	-0.209583	-0.139454	-0.0127655	0.0340848	0.0774727	-0.000841733	-0.322431	-0.167973	0.0788271	-0.253179	0.389587	-0.125898	0.0668203
82	-0.0507052	-0.215099	-0.179302	-0.13233	-0.0260063	0.0244948	0.109884	0.0102226	-0.32207	-0.170498	0.0785368	-0.25919	0.425706	-0.11913	0.0774843
82.1001	-0.0509371	-0.227551	-0.150572	-0.129234	-0.0391173	0.0158737	0.141934	0.0220549	-0.322508	-0.174346	0.0815005	-0.264576	0.457948	-0.113294	0.0882875
82.2002	-0.051382	-0.238268	-0.123821	-0.130367	-0.0519049	0.00840087	0.173279	0.0344869	-0.323594	-0.179228	0.087638	-0.269173	0.485853	-0.108526	0.0988771
82.2998	-0.0519362	-0.246943	-0.0994265	-0.135849	-0.064231	0.00221738	0.203558	0.0472978	-0.325116	-0.184877	0.0968121	-0.27283	0.509184	-0.104939	0.108868
82.3999	-0.052468	-0.253263	-0.0776712	-0.145718	-0.0759773	-0.00255101	0.232435	0.0602306	-0.326843	-0.191001	0.108792	-0.275428	0.52771	-0.10264	0.117867
82.5	-0.0528338	-0.257024	-0.058777	-0.159887	-0.0870532	-0.00584486	0.259606	0.0729553	-0.32856	-0.197352	0.123251	-0.276825	0.541396	-0.101706	0.125507
82.6001	-0.052888	-0.258022	-0.042906	-0.178194	-0.0973385	-0.00763573	0.28475	0.0851652	-0.330051	-0.203683	0.139788	-0.276936	0.550321	-0.102185	0.131436
82.7002	-0.0524646	-0.256132	-0.0301744	-0.200348	-0.106681	-0.00797319	0.307625	0.0965143	-0.33116	-0.209809	0.157934	-0.275731	0.554612	-0.104067	0.135292
82.7998	-0.0514202	-0.2513	-0.0205976	-0.226036	-0.114982	-0.00696788	0.327995	0.106668	-0.331776	-0.215555	0.177181	-0.273193	0.554605	-0.107335	0.136845
82.8999	-0.0495906	-0.243577	-0.0141584	-0.254818	-0.122093	-0.00472486	0.345682	0.115308	-0.331819	-0.220733	0.196967	-0.269376	0.550593	-0.111934	0.135853
83	-0.0468246	-0.233039	-0.0107462	-0.286192	-0.127888	-0.00142883	0.360575	0.12212	-0.331281	-0.225197	0.216657	-0.264374	0.543012	-0.117784	0.132172
83.1001	-0.0429809	-0.219882	-0.0102179	-0.319567	-0.132259	0.00276557	0.372634	0.126912	-0.330195	-0.228809	0.235707	-0.258337	0.532392	-0.124789	0.12566
83.2002	-0.0379299	-0.204345	-0.0123484	-0.354309	-0.135056	0.00762944	0.381844	0.129491	-0.328655	-0.231435	0.253516	-0.251469	0.519243	-0.132811	0.116333
83.2998	-0.0315849	-0.186753	-0.0168592	-0.389757	-0.136174	0.0129339	0.388268	0.129751	-0.326824	-0.232918	0.269495	-0.24398	0.504125	-0.141649	0.104302
83.3999	-0.0238686	-0.167466	-0.023411	-0.425236	-0.135501	0.0184671	0.392029	0.127688	-0.324904	-0.233135	0.283081	-0.23616	0.487597	-0.151136	0.0896646
83.5	-0.0147362	-0.146884	-0.031666	-0.460098	-0.132972	0.0240081	0.393279	0.123319	-0.323124	-0.231946	0.293783	-0.228249	0.470246	-0.161007	0.0726987
83.6001	-0.00416945	-0.125413	-0.0411856	-0.493679	-0.128617	0.0293526	0.392249	0.116767	-0.32171	-0.229191	0.301173	-0.220547	0.452585	-0.171073	0.0536958
83.7002	0.00781243	-0.10345	-0.0515654	-0.525394	-0.122474	0.0343138	0.389145	0.108148	-0.32093	-0.224744	0.30494	-0.213336	0.435132	-0.1811	0.0330755
83.7998	0.0211467	-0.0813987	-0.0623095	-0.554676	-0.114661	0.0387599	0.384224	0.0976786	-0.321051	-0.218495	0.304781	-0.206853	0.418373	-0.190857	0.0112954
83.8999	0.0357482	-0.0596258	-0.0729429	-0.581051	-0.105374	0.0425403	0.377774	0.0856337	-0.322287	-0.210322	0.300519	-0.201345	0.402778	-0.200085	-0.0111445
84	0.0514881	-0.0384771	-0.0830309	-0.604128	-0.0948848	0.0455884	0.370026	0.0722949	-0.324888	-0.200147	0.292057	-0.196989	0.388762	-0.208556	-0.0337142
84.1001	0.0682129	-0.0182039	-0.0920946	-0.623556	-0.083574	0.0478239	0.36127	0.0580103	-0.329	-0.18793	0.279445	-0.193898	0.376677	-0.216101	-0.0559462
84.2002	0.0857516	0.000983964	-0.0997908	-0.63916	-0.0718771	0.0492374	0.351777	0.0430886	-0.334719	-0.173674	0.262836	-0.192162	0.366859	-0.222576	-0.0772761
84.2998	0.10388	0.0189397	-0.10577	-0.650823	-0.0602707	0.0498021	0.341742	0.027843	-0.34211	-0.157445	0.242501	-0.191787	0.35955	-0.227885	-0.0972117
84.3999	0.122386	0.0355838	-0.109799	-0.65846	-0.0492642	0.0495389	0.331382	0.0125813	-0.351148	-0.139392	0.218755	-0.192749	0.354904	-0.231945	-0.115253
84.5	0.141014	0.0508693	-0.111695	-0.662075	-0.0393183	0.0484861	0.320836	-0.00242591	-0.361806	-0.119755	0.192015	-0.194946	0.353054	-0.234691	-0.131065
84.6001	0.159527	0.0647929	-0.111365	-0.661781	-0.030943	0.0466648	0.310266	-0.0168741	-0.373986	-0.098821	0.162739	-0.198229	0.354039	-0.23614	-0.144316
84.7002	0.177664	0.0774061	-0.108813	-0.657797	-0.0245723	0.0441377	0.299784	-0.030546	-0.387472	-0.0769563	0.131538	-0.202475	0.357846	-0.236334	-0.154796
84.7998	0.195169	0.0887701	-0.104197	-0.650308	-0.0206048	0.0409449	0.289473	-0.0431829	-0.402025	-0.054548	0.0989969	-0.207494	0.364334	-0.235351	-0.162361
84.8999	0.211797	0.0989425	-0.0977251	-0.639582	-0.0193477	0.0371645	0.279382	-0.0545769	-0.4173	-0.0320448	0.0657556	-0.2131	0.373321	-0.233304	-0.166962
85	0.227328	0.108006	-0.0897219	-0.625883	-0.0209899	0.0328254	0.269567	-0.0645502	-0.432965	-0.0099531	0.032451	-0.21912	0.384548	-0.230346	-0.168566
85.1001	0.241553	0.116021	-0.08058	-0.609573	-0.0256189	0.0280076	0.260068	-0.0729601	-0.448639	0.0112173	-0.00027176	-0.225321	0.397679	-0.226707	-0.167269
85.2002	0.254291	0.123036	-0.0707438	-0.590977	-0.033168	0.0227683	0.25091	-0.079686	-0.46388	0.0310144	-0.0317948	-0.231547	0.412306	-0.222594	-0.163214
85.2998	0.265396	0.129067	-0.0606844	-0.57049	-0.043458	0.0172123	0.242112	-0.0846334	-0.478261	0.0489919	-0.0615765	-0.237634	0.427946	-0.218243	-0.156618
85.3999	0.274754	0.134137	-0.0509131	-0.548452	-0.0561598	0.0114082	0.233682	-0.0876946	-0.491301	0.0647756	-0.0890748	-0.243452	0.444061	-0.21392	-0.147669
85.5	0.282301	0.13821	-0.0419161	-0.525257	-0.0708493	0.0054555	0.225621	-0.088825	-0.502536	0.0781011	-0.113823	-0.248865	0.460081	-0.209868	-0.136627
85.6001	0.287985	0.141219	-0.0341112	-0.501251	-0.087032	-0.000535346	0.217893	-0.0879895	-0.51155	0.088783	-0.135435	-0.253743	0.475376	-0.206331	-0.123686
85.7002	0.291832	0.143117	-0.0279123	-0.476801	-0.104139	-0.00643845	0.210454	-0.0852273	-0.517977	0.0966725	-0.153643	-0.257996	0.489345	-0.203523	-0.109157
85.7998	0.293884	0.143809	-0.0235865	-0.45231	-0.121572	-0.0121318	0.203282	-0.080565	-0.5215	0.101798	-0.168168	-0.261495	0.501362	-0.201661	-0.0932921
85.8999	0.294236	0.143232	-0.0213663	-0.428144	-0.138764	-0.0174495	0.196342	-0.074038	-0.521852	0.104278	-0.178872	-0.264162	0.510868	-0.20092	-0.0763301
86	0.293016	0.141304	-0.0213511	-0.404673	-0.155184	-0.0221967	0.189639	-0.0657608	-0.518863	0.104296	-0.185691	-0.265898	0.517366	-0.201447	-0.0584391
86.1001	0.290376	0.13797	-0.0235407	-0.382191	-0.170319	-0.0262039	0.183126	-0.0558302	-0.512471	0.102121	-0.18865	-0.266608	0.520396	-0.203339	-0.0398139
86.2002	0.286522	0.13318	-0.0278246	-0.360985	-0.18378	-0.0292803	0.176785	-0.0444377	-0.502722	0.0980969	-0.187878	-0.266225	0.519629	-0.206632	-0.020584
86.2998	0.281651	0.12692	-0.0340101	-0.34127	-0.19524	-0.0312715	0.170615	-0.0317268	-0.489759	0.092551	-0.18352	-0.264631	0.514833	-0.211292	-0.000867717
86.3999	0.275989	0.119229	-0.0417463	-0.323244	-0.204508	-0.0320058	0.164552	-0.0178809	-0.473794	0.0858605	-0.175837	-0.261734	0.505914	-0.21723	0.0192376
86.5	0.269795	0.110148	-0.0506594	-0.307003	-0.211496	-0.0313362	0.158618	-0.00312631	-0.455179	0.0783615	-0.165141	-0.25741	0.492847	-0.2243	0.0395929
86.6001	0.263318	0.0997792	-0.0603334	-0.29257	-0.216195	-0.0291541	0.15282	0.0123394	-0.434322	0.0703666	-0.151826	-0.251578	0.475801	-0.232304	0.0601159
86.7002	0.256817	0.0882855	-0.070286	-0.279869	-0.218728	-0.0253621	0.14717	0.0282681	-0.411725	0.0621715	-0.136323	-0.244184	0.455063	-0.241036	0.0807115
86.7998	0.250535	0.0758439	-0.0800383	-0.268814	-0.219271	-0.0199184	0.141715	0.0444794	-0.38795	0.0539916	-0.119127	-0.235101	0.431014	-0.250242	0.101269
86.8999	0.244713	0.0626856	-0.089163	-0.25923	-0.218048	-0.0128021	0.136472	0.0607839	-0.363611	0.0459907	-0.100796	-0.224293	0.40417	-0.259589	0.121628
87	0.239577	0.04905	-0.0972139	-0.250883	-0.215347	-0.00406632	0.131504	0.0769695	-0.339346	0.0382476	-0.0819304	-0.211653	0.375121	-0.268757	0.141655
87.1001	0.235332	0.0352236	-0.103834	-0.243502	-0.211423	0.00622396	0.126795	0.0929001	-0.315723	0.0308116	-0.0631472	-0.197175	0.34449	-0.277383	0.161144
87.2002	0.232162	0.0214601	-0.108736	-0.236774	-0.206572	0.0179371	0.122423	0.108435	-0.293339	0.0236331	-0.0450429	-0.180884	0.312941	-0.285153	0.179886
87.2998	0.230225	0.00808384	-0.111738	-0.230392	-0.201063	0.0308939	0.118431	0.123449	-0.272722	0.0166625	-0.0282224	-0.162803	0.281156	-0.291733	0.19764
87.3999	0.229642	-0.00463571	-0.112719	-0.224041	-0.1951	0.0448995	0.114839	0.137865	-0.254356	0.00974109	-0.0131562	-0.143015	0.249788	-0.296867	0.214134
87.5	0.230521	-0.0163869	-0.111681	-0.217468	-0.188835	0.0597255	0.111673	0.151613	-0.238654	0.00275712	-0.000356345	-0.121624	0.219493	-0.300314	0.229069
87.6001	0.232895	-0.026925	-0.108723	-0.210434	-0.182395	0.075095	0.108921	0.164682	-0.225922	-0.00441949	0.00979995	-0.0987994	0.190844	-0.30188	0.242142
87.7002	0.236797	-0.0359926	-0.104038	-0.202799	-0.175855	0.090703	0.106595	0.177067	-0.216419	-0.0118803	0.0169789	-0.0747347	0.164358	-0.301366	0.253079
87.7998	0.242193	-0.0433912	-0.0978701	-0.194416	-0.169226	0.106258	0.104673	0.188781	-0.210231	-0.0197416	0.0209897	-0.0496553	0.140425	-0.298688	0.261566
87.8999	0.249032	-0.0489372	-0.0905592	-0.185228	-0.162517	0.121427	0.103168	0.199847	-0.207354	-0.0280573	0.0216859	-0.0238207	0.119437	-0.293774	0.267349
88	0.257223	-0.052525	-0.0824968	-0.175211	-0.155667	0.135917	0.102055	0.210259	-0.207699	-0.0368685	0.0190229	0.00251374	0.1016	-0.286597	0.270153
88.1001	0.266616	-0.0540624	-0.074135	-0.16436	-0.148676	0.149393	0.101318	0.220046	-0.211065	-0.0462004	0.0130525	0.0290464	0.0871212	-0.277211	0.269787
88.2002	0.277057	-0.0535379	-0.0659411	-0.152748	-0.141535	0.161558	0.100958	0.229191	-0.217204	-0.0560416	0.00393127	0.0554895	0.0761321	-0.265671	0.266033
88.2998	0.288331	-0.0509782	-0.0583422	-0.140484	-0.134234	0.172144	0.10094	0.237704	-0.225749	-0.0663234	-0.00813113	0.0815264	0.0686785	-0.252115	0.258759
88.3999	0.300217	-0.0464611	-0.0517237	-0.127706	-0.126798	0.180904	0.10133	0.24558	-0.236305	-0.0769679	-0.0228921	0.106909	0.0648002	-0.236693	0.247959
88.5	0.312483	-0.0401192	-0.0464632	-0.114571	-0.119287	0.187631	0.102114	0.252788	-0.248375	-0.0878428	-0.0400586	0.131439	0.0643607	-0.219551	0.233624
88.6001	0.324853	-0.0321198	-0.0428659	-0.101227	-0.111764	0.192179	0.103279	0.259293	-0.261443	-0.0988227	-0.0593098	0.154901	0.0673433	-0.200894	0.215893
88.7002	0.337073	-0.022667	-0.0412066	-0.0877837	-0.104361	0.194431	0.104879	0.265013	-0.27497	-0.109797	-0.0803253	0.177163	0.0736099	-0.180941	0.194897
88.7998	0.348857	-0.0120374	-0.0416147	-0.0743712	-0.0972321	0.194365	0.10692	0.269899	-0.288368	-0.120626	-0.102804	0.198134	0.0830559	-0.159966	0.170902
88.8999	0.35994	-0.000495428	-0.0441534	-0.061035	-0.0905582	0.191969	0.109438	0.273891	-0.301065	-0.131177	-0.126512	0.217779	0.0955164	-0.138242	0.144264
89	0.370069	0.0116277	-0.0487864	-0.0478877	-0.0845252	0.187317	0.112459	0.276925	-0.312512	-0.141337	-0.151199	0.236095	0.11084	-0.116039	0.115391
89.1001	0.379	0.0240426	-0.0554106	-0.0349578	-0.0793342	0.180537	0.11594	0.278946	-0.322159	-0.15098	-0.176636	0.253125	0.128784	-0.093702	0.0847322
89.2002	0.386527	0.0364041	-0.0637896	-0.0223197	-0.0751827	0.171769	0.119846	0.279884	-0.3295	-0.159964	-0.202645	0.268987	0.14914	-0.0715209	0.052807
89.2998	0.392452	0.0483707	-0.0736181	-0.0100058	-0.0722176	0.161269	0.124121	0.279717	-0.334064	-0.168167	-0.229072	0.283804	0.171645	-0.0498109	0.0202104
89.3999	0.396637	0.0596189	-0.0845358	0.00198184	-0.0705618	0.149264	0.128668	0.278434	-0.335419	-0.175514	-0.255765	0.29768	0.19601	-0.0288696	-0.0125254
89.5	0.398977	0.0698385	-0.0961077	0.013609	-0.0703129	0.136025	0.133377	0.275999	-0.333254	-0.181903	-0.282533	0.310758	0.221904	-0.00900146	-0.0447863
89.6001	0.39941	0.0787667	-0.107863	0.0248891	-0.0715811	0.121842	0.138062	0.272424	-0.327322	-0.187326	-0.30919	0.323119	0.248913	0.00952516	-0.0759886
89.7002	0.397933	0.0861291	-0.11932	0.0358106	-0.0744239	0.10699	0.14254	0.267718	-0.317418	-0.191795	-0.335495	0.334823	0.276605	0.0263961	-0.105589
89.7998	0.394572	0.0917061	-0.130001	0.0463678	-0.0788497	0.0917371	0.146542	0.261889	-0.303505	-0.1953	-0.36118	0.345925	0.304522	0.0413732	-0.133112
89.8999	0.389404	0.0953383	-0.139456	0.0565644	-0.0848034	0.0763047	0.149849	0.254959	-0.285616	-0.197874	-0.385966	0.356419	0.332155	0.0542254	-0.158144
90	0.382566	0.0968775	-0.147286	0.0663835	-0.0922391	0.0609335	0.152169	0.24696	-0.263929	-0.199598	-0.40956	0.366239	0.358962	0.0648029	-0.180336
90.1001	0.374215	0.096269	-0.153094	0.0758248	-0.101091	0.0457588	0.153201	0.237974	-0.238673	-0.200535	-0.431611	0.37531	0.384419	0.0729764	-0.199388
90.2002	0.364551	0.093469	-0.156586	0.0848275	-0.111255	0.0309427	0.152664	0.228045	-0.210154	-0.200796	-0.451782	0.383447	0.407998	0.0787009	-0.215082
90.2998	0.353786	0.0885594	-0.157501	0.0933858	-0.122568	0.0165442	0.150294	0.217242	-0.178816	-0.200538	-0.469747	0.390461	0.429202	0.0819305	-0.227291
90.3999	0.34216	0.0816192	-0.155741	0.101462	-0.134855	0.00264153	0.145833	0.205624	-0.145135	-0.199952	-0.485201	0.39617	0.44757	0.0826692	-0.235998
90.5	0.329926	0.0727977	-0.151201	0.109024	-0.147922	-0.0107613	0.139065	0.193235	-0.109668	-0.199259	-0.497847	0.400387	0.462673	0.0810072	-0.241245
90.6001	0.317347	0.0622691	-0.143898	0.116011	-0.1616	-0.0236472	0.129859	0.180173	-0.0730308	-0.198701	-0.507504	0.402883	0.474159	0.0770957	-0.243172
90.7002	0.304666	0.0502527	-0.133887	0.122355	-0.175722	-0.0360219	0.118101	0.166475	-0.0358007	-0.198492	-0.51398	0.403523	0.481722	0.0710805	-0.241949
90.7998	0.292105	0.0370004	-0.12133	0.128012	-0.190077	-0.0478626	0.103787	0.152211	0.00140076	-0.198865	-0.517192	0.402152	0.485085	0.0632284	-0.237816
90.8999	0.279879	0.0227493	-0.106405	0.132963	-0.204486	-0.0591541	0.0869605	0.137475	0.0379861	-0.200051	-0.51715	0.398695	0.484136	0.0538181	-0.23102
91	0.268157	0.00780901	-0.0893843	0.137179	-0.218732	-0.0698714	0.0677574	0.122335	0.073448	-0.202231	-0.513914	0.393114	0.478803	0.0431916	-0.221798
91.1001	0.257088	-0.00756997	-0.0705282	0.140614	-0.232601	-0.0799573	0.0463781	0.106893	0.107319	-0.205564	-0.507686	0.385455	0.46908	0.0316297	-0.210451
91.2002	0.246773	-0.0231302	-0.0501978	0.1432	-0.245932	-0.0893184	0.0231176	0.0912103	0.139245	-0.210152	-0.498659	0.375821	0.455011	0.019469	-0.197264
91.2998	0.237287	-0.0386312	-0.0287325	0.144926	-0.258551	-0.0978308	-0.00168355	0.07538	0.168975	-0.216097	-0.487107	0.364394	0.436698	0.00698786	-0.182487
91.3999	0.228663	-0.0538341	-0.00654431	0.145756	-0.270313	-0.105342	-0.0276214	0.0594737	0.196335	-0.22339	-0.473372	0.351406	0.414347	-0.00547618	-0.166397
91.5	0.220904	-0.0685398	0.0159872	0.145666	-0.281101	-0.11164	-0.0542231	0.0435333	0.221257	-0.231986	-0.457862	0.337154	0.388143	-0.0176877	-0.149275
91.6001	0.213974	-0.0825951	0.038431	0.144657	-0.290812	-0.116582	-0.0809697	0.0276384	0.243806	-0.241823	-0.440992	0.321946	0.358407	-0.0294136	-0.131365
91.7002	0.207821	-0.0959027	0.0603979	0.142748	-0.299376	-0.119942	-0.107341	0.0118307	0.264093	-0.252725	-0.423187	0.306128	0.32544	-0.0404967	-0.112945
91.7998	0.202366	-0.108363	0.0814627	0.139971	-0.306742	-0.121577	-0.132838	-0.00383023	0.282375	-0.264485	-0.404873	0.290118	0.289634	-0.0508206	-0.0942534
91.8999	0.197529	-0.119935	0.101236	0.136397	-0.312878	-0.121329	-0.156959	-0.0192869	0.298913	-0.276831	-0.38645	0.274275	0.251333	-0.0603416	-0.075548
92	0.193227	-0.130584	0.119325	0.132122	-0.317777	-0.11911	-0.179232	-0.0345125	0.314021	-0.289508	-0.368336	0.258987	0.210972	-0.0690741	-0.0570525
92.1001	0.189361	-0.14033	0.135383	0.127272	-0.321419	-0.114861	-0.199195	-0.0494609	0.327997	-0.302279	-0.350947	0.244649	0.168975	-0.077115	-0.0390128
92.2002	0.185869	-0.149213	0.149107	0.122023	-0.323844	-0.108633	-0.216432	-0.0641075	0.341145	-0.314871	-0.334622	0.231603	0.125836	-0.0845379	-0.0216483
92.2998	0.182672	-0.157271	0.160238	0.116549	-0.325078	-0.100529	-0.230624	-0.0783875	0.353749	-0.32701	-0.319696	0.220116	0.082113	-0.0915411	-0.00523364
92.3999	0.179738	-0.164566	0.168556	0.111025	-0.325158	-0.0907325	-0.241515	-0.0922387	0.366037	-0.338444	-0.306409	0.210436	0.0383535	-0.0983079	0.0100423
92.5	0.177042	-0.17115	0.173902	0.105641	-0.324145	-0.0795382	-0.2489	-0.105612	0.378143	-0.349006	-0.295006	0.202747	-0.0049177	-0.10507	0.0239927
92.6001	0.174585	-0.177082	0.176218	0.100655	-0.322086	-0.0673024	-0.252719	-0.118436	0.390158	-0.358573	-0.285637	0.197206	-0.047093	-0.11202	0.0364763
92.7002	0.172394	-0.182406	0.175522	0.0962869	-0.319005	-0.054483	-0.252946	-0.130679	0.402007	-0.367113	-0.278395	0.193929	-0.0876349	-0.119376	0.0473291
92.7998	0.170493	-0.187178	0.171959	0.092743	-0.314951	-0.0415567	-0.249621	-0.142253	0.413562	-0.374645	-0.27333	0.192988	-0.125934	-0.127289	0.0564596
92.8999	0.168963	-0.191429	0.165727	0.0901548	-0.309942	-0.0290693	-0.242911	-0.153057	0.424597	-0.381255	-0.270404	0.194435	-0.161488	-0.135923	0.0638009
93	0.167866	-0.195171	0.157097	0.0886746	-0.304031	-0.0175793	-0.23305	-0.163014	0.434838	-0.387058	-0.269548	0.19824	-0.193794	-0.14539	0.0693284
93.1001	0.1673	-0.198406	0.14645	0.0884133	-0.297244	-0.00765908	-0.220339	-0.171994	0.443957	-0.392284	-0.270622	0.204358	-0.222408	-0.15579	0.0730611
93.2002	0.167341	-0.201111	0.134193	0.0893651	-0.289638	0.000155465	-0.205148	-0.17993	0.451605	-0.39716	-0.273474	0.212693	-0.246914	-0.167177	0.0750581
93.2998	0.168078	-0.203251	0.120804	0.0914537	-0.2813	0.00533405	-0.187913	-0.186721	0.457375	-0.401964	-0.277882	0.223141	-0.266995	-0.179587	0.0754415
93.3999	0.169587	-0.204795	0.106746	0.0945321	-0.272269	0.00745882	-0.169074	-0.192305	0.460871	-0.406949	-0.283598	0.235592	-0.282412	-0.19298	0.0743295
93.5	0.171933	-0.205648	0.0925253	0.0984059	-0.262607	0.00618485	-0.149123	-0.196641	0.46178	-0.412396	-0.29035	0.249841	-0.293007	-0.207286	0.0718175
93.6001	0.175155	-0.205726	0.0786131	0.102827	-0.252379	0.00130026	-0.128535	-0.199656	0.459842	-0.418548	-0.297849	0.265678	-0.298718	-0.222354	0.0680028
93.7002	0.179271	-0.204934	0.0654371	0.107447	-0.241632	-0.00728076	-0.107808	-0.20131	0.454903	-0.425616	-0.305787	0.282855	-0.299593	-0.238062	0.06308
93.7998	0.184262	-0.203193	0.053335	0.11191	-0.230402	-0.019543	-0.0874334	-0.201577	0.446908	-0.4338	-0.313881	0.301119	-0.295765	-0.254184	0.0572435
93.8999	0.190098	-0.200394	0.042568	0.115868	-0.218679	-0.0353263	-0.0678715	-0.200481	0.435903	-0.443231	-0.321853	0.320213	-0.287455	-0.27053	0.0506822
94	0.19671	-0.196448	0.0333002	0.118929	-0.206431	-0.0543691	-0.0495494	-0.198073	0.422064	-0.453921	-0.329462	0.339811	-0.274933	-0.286861	0.0435067
94.1001	0.204012	-0.191241	0.0256212	0.120701	-0.193689	-0.076252	-0.0328332	-0.194395	0.405655	-0.465843	-0.336468	0.359576	-0.258569	-0.302879	0.0358583
94.2002	0.211894	-0.18468	0.0194796	0.120867	-0.180404	-0.1005	-0.0179983	-0.189575	0.387052	-0.47891	-0.342705	0.37917	-0.238652	-0.318274	0.0278303
94.2998	0.220199	-0.176679	0.0147074	0.119143	-0.166553	-0.126524	-0.00528568	-0.183745	0.366708	-0.492982	-0.348039	0.398201	-0.215675	-0.332726	0.0195695
94.3999	0.228784	-0.167172	0.0110395	0.115339	-0.152068	-0.153682	0.00515911	-0.177058	0.345141	-0.507826	-0.352405	0.416346	-0.19004	-0.345886	0.011181
94.5	0.237483	-0.156123	0.00815944	0.10932	-0.136908	-0.181341	0.013235	-0.16971	0.32297	-0.523176	-0.355758	0.433229	-0.162237	-0.357455	0.00277532
94.6001	0.246126	-0.14349	0.00568561	0.101069	-0.121081	-0.208868	0.0188999	-0.161838	0.300757	-0.538781	-0.358104	0.448571	-0.132675	-0.367124	-0.00556552
94.7002	0.254544	-0.129258	0.00322513	0.0906373	-0.104577	-0.235601	0.0222068	-0.153691	0.279054	-0.554329	-0.35947	0.462075	-0.101796	-0.374602	-0.0137824
94.7998	0.262559	-0.113476	0.000352667	0.0782281	-0.0874769	-0.261007	0.0231969	-0.145456	0.258387	-0.569501	-0.359909	0.473429	-0.0700252	-0.379643	-0.0217875
94.8999	0.270016	-0.0962218	-0.0032713	0.0640908	-0.0698719	-0.284543	0.0219611	-0.137325	0.239192	-0.584008	-0.359459	0.482426	-0.0378075	-0.382076	-0.0295008
95	0.27676	-0.0776271	-0.00795384	0.0485364	-0.0519047	-0.305783	0.0185948	-0.12951	0.221866	-0.597614	-0.358256	0.488886	-0.00545708	-0.381772	-0.0368346
95.1001	0.28267	-0.0578384	-0.0139639	0.0319444	-0.0337761	-0.324391	0.0132276	-0.122164	0.206665	-0.610139	-0.356353	0.492677	0.0266828	-0.37871	-0.0437125
95.2002	0.287634	-0.0370255	-0.0214083	0.0147134	-0.0156924	-0.340123	0.00599261	-0.115476	0.193798	-0.621426	-0.353874	0.493731	0.0582807	-0.372852	-0.0500811
95.2998	0.291551	-0.0153981	-0.0303461	-0.0027007	0.00208142	-0.352818	-0.00299086	-0.109536	0.183387	-0.631368	-0.35095	0.492026	0.0890995	-0.364301	-0.0558623
95.3999	0.294366	0.00679069	-0.040682	-0.019863	0.0192277	-0.362441	-0.013586	-0.104426	0.17543	-0.639966	-0.347633	0.487608	0.118874	-0.353188	-0.0610007
95.5	0.296034	0.0292592	-0.0522692	-0.0363406	0.0354287	-0.369015	-0.0256575	-0.100218	0.169878	-0.647297	-0.344011	0.480598	0.147409	-0.33966	-0.0654124
95.6001	0.296532	0.0517068	-0.0648386	-0.0517691	0.0503625	-0.372643	-0.0390507	-0.0969271	0.166594	-0.653522	-0.340111	0.47111	0.17453	-0.323939	-0.0690612
95.7002	0.295884	0.0738244	-0.0780298	-0.0658053	0.0637694	-0.37348	-0.0536386	-0.094552	0.165399	-0.658853	-0.335996	0.459309	0.200076	-0.306261	-0.0718726
95.7998	0.294114	0.0953125	-0.0914404	-0.0781249	0.0753948	-0.371719	-0.0692749	-0.0930659	0.166055	-0.663525	-0.331632	0.445401	0.22394	-0.286846	-0.0737895
95.8999	0.291269	0.115861	-0.104611	-0.0885524	0.0850271	-0.367584	-0.0858172	-0.0924078	0.168297	-0.667814	-0.327047	0.429621	0.246016	-0.26596	-0.074766
96	0.287438	0.135156	-0.117102	-0.0969142	0.0925468	-0.361324	-0.103088	-0.0925158	0.17186	-0.672023	-0.322164	0.412176	0.266191	-0.243879	-0.0747164
96.1001	0.282715	0.152961	-0.128464	-0.103136	0.0979104	-0.35318	-0.120813	-0.0932954	0.176498	-0.676462	-0.316988	0.393338	0.284434	-0.220842	-0.0735987
96.2002	0.277219	0.168994	-0.13831	-0.107189	0.101174	-0.343391	-0.138718	-0.0946951	0.182029	-0.68143	-0.311461	0.373383	0.300686	-0.197051	-0.0713977
96.2998	0.271062	0.183083	-0.146284	-0.109087	0.102454	-0.332214	-0.156475	-0.0966665	0.18824	-0.687152	-0.30559	0.352562	0.314909	-0.172684	-0.0680636
96.3999	0.264393	0.195085	-0.152151	-0.108902	0.101951	-0.319864	-0.173727	-0.099177	0.194907	-0.693842	-0.299325	0.331102	0.327063	-0.147926	-0.0636042
96.5	0.257364	0.204914	-0.155688	-0.106764	0.0998927	-0.306539	-0.190023	-0.102215	0.201846	-0.701622	-0.29271	0.309257	0.337134	-0.122979	-0.0580634
96.6001	0.250127	0.212549	-0.1568	-0.102846	0.0965054	-0.292486	-0.204946	-0.105808	0.208887	-0.710519	-0.285741	0.287282	0.345123	-0.0980395	-0.051462
96.7002	0.242852	0.218007	-0.155462	-0.0973452	0.0920805	-0.277862	-0.217993	-0.110002	0.21592	-0.720516	-0.278463	0.265385	0.351011	-0.0732874	-0.0438269
96.7998	0.235683	0.221416	-0.151722	-0.0905188	0.0868707	-0.26286	-0.228706	-0.114865	0.222754	-0.73149	-0.270886	0.243702	0.354794	-0.0489433	-0.0352248
96.8999	0.228783	0.222914	-0.145714	-0.0826262	0.081166	-0.247653	-0.236639	-0.120436	0.229263	-0.743243	-0.263077	0.222389	0.356464	-0.0252765	-0.0257262
97	0.222297	0.222763	-0.137654	-0.0739669	0.0751941	-0.232381	-0.241342	-0.126823	0.235279	-0.755491	-0.255118	0.201549	0.356054	-0.00255677	-0.0154227
97.1001	0.216354	0.221235	-0.127705	-0.0648192	0.0691318	-0.217219	-0.242418	-0.134091	0.24062	-0.767881	-0.247084	0.181235	0.353546	0.0189033	-0.004444
97.2002	0.211079	0.21863	-0.11616	-0.0554522	0.0630818	-0.202271	-0.239565	-0.142306	0.245099	-0.780007	-0.239007	0.161477	0.348984	0.0388089	0.00711263
97.2998	0.206565	0.21533	-0.103279	-0.0461444	0.0570176	-0.187691	-0.232563	-0.151533	0.24852	-0.791471	-0.23088	0.142218	0.34233	0.0568816	0.0191156
97.3999	0.202899	0.211682	-0.0893633	-0.037157	0.0508799	-0.173556	-0.221298	-0.161738	0.250624	-0.801812	-0.222677	0.123436	0.333651	0.0728142	0.0314714
97.5	0.20014	0.208033	-0.0747282	-0.0287894	0.0445627	-0.159994	-0.205772	-0.1729	0.251219	-0.810625	-0.214351	0.105018	0.322908	0.0863671	0.0440999
97.6001	0.198309	0.204691	-0.0597021	-0.021284	0.0378977	-0.147064	-0.18608	-0.184906	0.250062	-0.817484	-0.205824	0.0868731	0.310189	0.0973024	0.0568887
97.7002	0.197417	0.201968	-0.0446131	-0.014881	0.0307033	-0.134802	-0.162441	-0.197654	0.246958	-0.822032	-0.196961	0.068854	0.29553	0.10547	0.0697481
97.7998	0.197444	0.200049	-0.0298197	-0.00974072	0.0227136	-0.123224	-0.135251	-0.210919	0.241774	-0.824011	-0.187617	0.0508025	0.27908	0.110804	0.0825349
97.8999	0.19836	0.199105	-0.0156252	-0.00601185	0.0136891	-0.112347	-0.104919	-0.224487	0.234361	-0.823196	-0.177609	0.0325698	0.260958	0.113314	0.0951883
98	0.200107	0.199202	-0.00234051	-0.00379552	0.00341997	-0.102159	-0.0721045	-0.238117	0.224649	-0.819451	-0.166736	0.0140433	0.241363	0.113083	0.107605
98.1001	0.20261	0.20032	0.00972729	-0.0031413	-0.00827001	-0.0926205	-0.0374803	-0.251502	0.212587	-0.812712	-0.154775	-0.0048971	0.22045	0.110308	0.119652
98.2002	0.205787	0.202357	0.0202845	-0.00404729	-0.0214573	-0.0836787	-0.00177708	-0.264369	0.198166	-0.803037	-0.141497	-0.0243181	0.198436	0.105233	0.131188
98.2998	0.20953	0.205086	0.0290697	-0.00643147	-0.0361732	-0.0752653	0.0342147	-0.276361	0.181516	-0.790526	-0.126744	-0.044235	0.175602	0.0982089	0.142071
98.3999	0.213731	0.20824	0.0358637	-0.0102176	-0.0523798	-0.0672964	0.0696343	-0.287187	0.162786	-0.775358	-0.110335	-0.064602	0.152201	0.0896245	0.152176
98.5	0.218259	0.211442	0.0404776	-0.0152491	-0.0699656	-0.0597279	0.103675	-0.296575	0.142197	-0.757764	-0.0922018	-0.0853429	0.128559	0.0799173	0.161366
98.6001	0.222999	0.214299	0.0428083	-0.0213584	-0.0886756	-0.0524779	0.135427	-0.304258	0.120049	-0.73807	-0.0723429	-0.106313	0.105006	0.0694713	0.169487
98.7002	0.22783	0.216386	0.042795	-0.0283584	-0.108156	-0.0455427	0.164096	-0.310032	0.0966884	-0.71664	-0.0508169	-0.127351	0.081862	0.058701	0.176342
98.7998	0.232642	0.217225	0.0404509	-0.0360602	-0.127985	-0.0388687	0.188949	-0.313707	0.072456	-0.693871	-0.0277535	-0.148256	0.0594602	0.047946	0.18177
98.8999	0.237327	0.216347	0.0358808	-0.0442466	-0.147665	-0.0324868	0.209277	-0.315154	0.0477239	-0.670184	-0.00339098	-0.16876	0.0381309	0.0375514	0.185585
99	0.241808	0.213318	0.02931	-0.0527076	-0.166717	-0.0264117	0.224534	-0.314311	0.0228564	-0.645983	0.0219573	-0.188618	0.0181115	0.0277603	0.18771
99.1001	0.24601	0.207796	0.0209902	-0.0612525	-0.184607	-0.0207258	0.234254	-0.311144	-0.00178794	-0.621633	0.0479389	-0.207591	-0.00029445	0.0187601	0.188019
99.2002	0.249886	0.199465	0.0113085	-0.0697383	-0.200799	-0.0155033	0.238089	-0.305694	-0.0258676	-0.597485	0.0740883	-0.225419	-0.0168336	0.0106543	0.186455
99.2998	0.253399	0.188133	0.000686453	-0.0780333	-0.214825	-0.0108759	0.235868	-0.298019	-0.049091	-0.573869	0.0999364	-0.24192	-0.0313539	0.00345271	0.183022
99.3999	0.256563	0.173682	-0.0104067	-0.0860995	-0.226263	-0.00699833	0.227544	-0.2882	-0.0711948	-0.551087	0.12498	-0.256914	-0.0437319	-0.00291163	0.177773
99.5	0.259386	0.156115	-0.0214693	-0.0938758	-0.234731	-0.00402082	0.213197	-0.276407	-0.0920245	-0.529379	0.148682	-0.270276	-0.0539254	-0.00855993	0.170803
99.6001	0.261923	0.135573	-0.0319712	-0.101396	-0.239943	-0.00213241	0.193126	-0.262772	-0.111435	-0.50896	0.17055	-0.281943	-0.0618715	-0.013673	0.162277
99.7002	0.264234	0.112295	-0.0413858	-0.108705	-0.241706	-0.00148378	0.167743	-0.247505	-0.129398	-0.489985	0.190136	-0.291883	-0.0676768	-0.0184103	0.15239
99.7998	0.266403	0.0866186	-0.0492594	-0.115906	-0.239961	-0.00224849	0.137576	-0.230796	-0.145911	-0.472588	0.20704	-0.300161	-0.0714219	-0.0230352	0.141388
99.8999	0.268524	0.0589473	-0.0551493	-0.123127	-0.234819	-0.0045564	0.103322	-0.212878	-0.161044	-0.45684	0.220991	-0.306851	-0.0732366	-0.0277439	0.129566
100	0.270719	0.0297782	-0.0586912	-0.130505	-0.226467	-0.00850257	0.0657363	-0.194005	-0.174866	-0.442754	0.231794	-0.312073	-0.0732659	-0.0327285	0.117233
100.1	0.273111	-0.000336949	-0.0596354	-0.138229	-0.215236	-0.0141692	0.0256764	-0.174378	-0.18749	-0.430326	0.239339	-0.316012	-0.0717034	-0.0381067	0.104717
100.2	0.275818	-0.0308851	-0.0578329	-0.146477	-0.201514	-0.0215104	-0.0159557	-0.154248	-0.199019	-0.419538	0.243689	-0.318799	-0.0687634	-0.0439942	0.0923463
100.3	0.278955	-0.0615095	-0.0532095	-0.155422	-0.185777	-0.0304977	-0.058169	-0.133873	-0.209557	-0.410376	0.244959	-0.320598	-0.0646941	-0.0504062	0.0804406
100.4	0.282633	-0.0917766	-0.0458548	-0.165211	-0.168535	-0.0409901	-0.100035	-0.113501	-0.219204	-0.402849	0.243406	-0.321572	-0.0597441	-0.0573236	0.0692216
100.5	0.286949	-0.121133	-0.0358946	-0.176046	-0.150368	-0.0528059	-0.140625	-0.0934112	-0.228036	-0.396909	0.239349	-0.321866	-0.0541343	-0.0646886	0.0589544
100.6	0.291983	-0.149039	-0.0236456	-0.188097	-0.131894	-0.0656747	-0.179062	-0.0738532	-0.2361	-0.392535	0.23323	-0.321612	-0.0480634	-0.0723804	0.0498411
100.7	0.297785	-0.175061	-0.00944348	-0.201481	-0.113727	-0.0792682	-0.214516	-0.0550621	-0.243405	-0.389732	0.225501	-0.320926	-0.0416882	-0.0802496	0.0419809
100.8	0.304377	-0.19901	0.00623112	-0.216328	-0.096447	-0.093247	-0.246354	-0.0372815	-0.249937	-0.388472	0.216672	-0.319862	-0.0351544	-0.0881073	0.0354673
100.9	0.311754	-0.220862	0.0228785	-0.232716	-0.0805691	-0.107196	-0.273968	-0.0207219	-0.255656	-0.388728	0.20724	-0.31843	-0.0285924	-0.0957686	0.0303327
101	0.319898	-0.240807	0.0399187	-0.250664	-0.0665215	-0.12073	-0.296885	-0.00561592	-0.260529	-0.390478	0.197708	-0.31664	-0.0220716	-0.103031	0.0265313
101.1	0.328739	-0.259188	0.0567968	-0.270145	-0.0546872	-0.133419	-0.314825	0.00788716	-0.2645	-0.393714	0.188532	-0.314473	-0.0156539	-0.109713	0.0239621
101.2	0.338201	-0.276543	0.0729063	-0.291063	-0.0452991	-0.144879	-0.327618	0.0196206	-0.267559	-0.398358	0.180111	-0.311906	-0.00934623	-0.115652	0.0225316
101.3	0.348168	-0.293559	0.087673	-0.31328	-0.0385106	-0.154755	-0.335255	0.0294862	-0.269641	-0.40434	0.172744	-0.308908	-0.00311108	-0.120733	0.0220815
101.4	0.35851	-0.311134	0.100509	-0.336647	-0.0344202	-0.162767	-0.337866	0.037447	-0.270695	-0.411542	0.166677	-0.305443	0.00305292	-0.124881	0.022421
101.5	0.369087	-0.330364	0.110916	-0.360922	-0.0329877	-0.168669	-0.335768	0.0435098	-0.270748	-0.419808	0.162011	-0.301489	0.0092095	-0.128069	0.0234014
101.6	0.379748	-0.352499	0.118425	-0.385784	-0.0340786	-0.17238	-0.329344	0.0477684	-0.269863	-0.42893	0.158743	-0.297046	0.0154423	-0.130304	0.0248338
101.7	0.390348	-0.378982	0.1227	-0.410829	-0.0374897	-0.173822	-0.319153	0.0503428	-0.268115	-0.43866	0.156876	-0.2921	0.0217891	-0.131568	0.0265237
101.8	0.400719	-0.411388	0.123428	-0.435579	-0.0429427	-0.173074	-0.305777	0.0514317	-0.265644	-0.448713	0.156269	-0.286692	0.028292	-0.131922	0.0282766
101.9	0.41073	-0.451381	0.120426	-0.459572	-0.050116	-0.170272	-0.289932	0.0512791	-0.262613	-0.458749	0.156772	-0.280905	0.0350253	-0.131409	0.0299627
102	0.420246	-0.500627	0.113565	-0.482258	-0.0586467	-0.165666	-0.272329	0.0501769	-0.259174	-0.468436	0.158132	-0.274838	0.0420043	-0.130137	0.0314943
102.1	0.429151	-0.560827	0.102863	-0.503122	-0.0681279	-0.159572	-0.25374	0.0484832	-0.255528	-0.477362	0.160134	-0.268607	0.0492265	-0.128162	0.0328275
102.2	0.437362	-0.633573	0.0884073	-0.521644	-0.0782205	-0.152362	-0.234974	0.0465786	-0.251827	-0.485147	0.16248	-0.262393	0.0566879	-0.125608	0.033909
102.3	0.444799	-0.720304	0.0704535	-0.537329	-0.0885811	-0.144458	-0.216797	0.0448218	-0.248243	-0.49141	0.164988	-0.256391	0.0642828	-0.122538	0.0347482
102.4	0.451445	-0.822137	0.0492704	-0.549789	-0.0989397	-0.136294	-0.199896	0.0436049	-0.244918	-0.495825	0.167448	-0.250822	0.0719001	-0.119065	0.0353376
102.5	0.457275	-0.939893	0.0252474	-0.558649	-0.10907	-0.128302	-0.184969	0.0432289	-0.241986	-0.49808	0.169674	-0.245921	0.079403	-0.115192	0.0357572
102.6	0.462293	-1.07384	-0.00119038	-0.563702	-0.118782	-0.120894	-0.172552	0.0439914	-0.239521	-0.497946	0.17153	-0.241933	0.0865801	-0.111002	0.0360891
102.7	0.466547	-1.22375	-0.0295107	-0.56477	-0.127964	-0.114457	-0.163132	0.0461242	-0.237577	-0.495235	0.172887	-0.239112	0.0932298	-0.106518	0.0363561
102.8	0.470059	-1.38863	-0.059149	-0.561895	-0.136561	-0.109318	-0.157055	0.0497776	-0.236106	-0.48985	0.173711	-0.237682	0.0990706	-0.101743	0.0366861
102.9	0.472901	-1.56682	-0.0895273	-0.555254	-0.14457	-0.105765	-0.154529	0.0550495	-0.235081	-0.481762	0.173945	-0.23789	0.103851	-0.096692	0.0371229
103	0.475129	-1.7559	-0.120035	-0.545128	-0.152078	-0.103993	-0.155607	0.0618986	-0.234424	-0.471023	0.173577	-0.239943	0.107328	-0.0913559	0.0377599
103.1	0.476812	-1.95266	-0.150097	-0.531982	-0.159176	-0.10413	-0.160234	0.0702494	-0.234031	-0.457772	0.17261	-0.244018	0.109219	-0.0857325	0.0386907
103.2	0.478023	-2.15311	-0.179125	-0.516355	-0.165997	-0.106266	-0.168156	0.0799296	-0.233853	-0.442255	0.171057	-0.250238	0.109318	-0.0798002	0.0400068
103.3	0.478795	-2.35257	-0.2066	-0.498936	-0.172677	-0.110395	-0.17906	0.0906764	-0.233786	-0.424781	0.168956	-0.258682	0.107424	-0.0735683	0.0417577
103.4	0.479186	-2.54575	-0.23206	-0.480453	-0.179279	-0.116461	-0.192459	0.102216	-0.233761	-0.40569	0.166319	-0.269396	0.103426	-0.0670428	0.0439702
103.5	0.479218	-2.72699	-0.255133	-0.461708	-0.185887	-0.124374	-0.207803	0.114217	-0.23373	-0.385397	0.163137	-0.282353	0.0971771	-0.0602705	0.0466672
103.6	0.478914	-2.89034	-0.275528	-0.4435	-0.192526	-0.134014	-0.224483	0.126354	-0.233664	-0.364318	0.1594	-0.297425	0.0887093	-0.0532566	0.0498735
103.7	0.478281	-3.02984	-0.293099	-0.426559	-0.199217	-0.145198	-0.241762	0.138278	-0.233557	-0.342873	0.155079	-0.314434	0.0780579	-0.0460464	0.0536023
103.8	0.477283	-3.13977	-0.307741	-0.411621	-0.205892	-0.157789	-0.258937	0.149673	-0.233457	-0.321483	0.150162	-0.333118	0.0653972	-0.038651	0.0578729
103.9	0.475928	-3.21487	-0.319479	-0.399273	-0.212436	-0.17159	-0.275253	0.160272	-0.233428	-0.300548	0.144585	-0.353211	0.0509728	-0.0310803	0.0626222
104	0.474173	-3.25065	-0.328411	-0.390034	-0.218717	-0.186408	-0.289998	0.169822	-0.233563	-0.280394	0.138315	-0.374339	0.035091	-0.0233142	0.0678541
104.1	0.471992	-3.24362	-0.334727	-0.384203	-0.224522	-0.202041	-0.302573	0.17815	-0.23398	-0.261331	0.131326	-0.396106	0.0181387	-0.0153982	0.0735017
104.2	0.469354	-3.1914	-0.33868	-0.381977	-0.229665	-0.218266	-0.312393	0.185146	-0.234861	-0.2436	0.123618	-0.418104	0.00059674	-0.00733721	0.0794984
104.3	0.46623	-3.09296	-0.340609	-0.383352	-0.233943	-0.23487	-0.319034	0.190753	-0.236291	-0.227326	0.115166	-0.439863	-0.0170483	0.000821008	0.0857354
104.4	0.462593	-2.94864	-0.340828	-0.388203	-0.237145	-0.251649	-0.322177	0.195011	-0.238358	-0.212593	0.105998	-0.460926	-0.0342678	0.0090861	0.0921174
104.5	0.458438	-2.76026	-0.339689	-0.396221	-0.239063	-0.268363	-0.321593	0.197944	-0.241117	-0.199433	0.096106	-0.480889	-0.0505153	0.01743	0.0985299
104.6	0.453759	-2.53102	-0.33749	-0.406969	-0.239549	-0.284754	-0.317224	0.199695	-0.244582	-0.187804	0.0855371	-0.499347	-0.0653023	0.0258477	0.104817
104.7	0.448576	-2.26539	-0.334515	-0.419903	-0.238475	-0.3006	-0.309091	0.200389	-0.248765	-0.17756	0.074394	-0.515943	-0.078133	0.0343454	0.110851
104.8	0.442903	-1.96897	-0.330956	-0.43433	-0.235806	-0.315649	-0.297387	0.200185	-0.253565	-0.168542	0.0627626	-0.530338	-0.0886091	0.0428603	0.116497
104.9	0.436783	-1.64818	-0.326977	-0.449558	-0.231599	-0.32964	-0.282373	0.199249	-0.258873	-0.160506	0.0507502	-0.542256	-0.0963354	0.0514096	0.121597
105	0.430268	-1.31014	-0.32263	-0.464828	-0.225954	-0.342333	-0.264424	0.197736	-0.264531	-0.153219	0.038457	-0.551493	-0.101146	0.0599214	0.126011
105.1	0.423406	-0.962214	-0.317904	-0.479477	-0.219044	-0.353472	-0.243987	0.195806	-0.270304	-0.146455	0.0260016	-0.557914	-0.102823	0.0683638	0.129643
105.2	0.416268	-0.611829	-0.312752	-0.492842	-0.211119	-0.362808	-0.221555	0.193586	-0.275986	-0.139982	0.0134624	-0.561472	-0.101393	0.0766232	0.132408
105.3	0.4089	-0.266141	-0.307022	-0.504337	-0.202456	-0.370125	-0.197644	0.191198	-0.28128	-0.133594	0.000896452	-0.562136	-0.0969219	0.0845907	0.134319
105.4	0.401379	0.0681914	-0.300541	-0.513471	-0.193397	-0.375187	-0.172776	0.18871	-0.285914	-0.12707	-0.0115814	-0.559918	-0.0895889	0.0921157	0.135342
105.5	0.393744	0.385258	-0.293066	-0.519815	-0.18425	-0.377809	-0.147462	0.186168	-0.289637	-0.120249	-0.0239051	-0.554925	-0.0797066	0.0990635	0.135548
105.6	0.386062	0.680036	-0.284373	-0.523117	-0.175319	-0.377847	-0.12222	0.183602	-0.292173	-0.112998	-0.0359676	-0.547237	-0.0676555	0.105269	0.135006
105.7	0.378365	0.948553	-0.274254	-0.523243	-0.166913	-0.37523	-0.0974895	0.181037	-0.293325	-0.105248	-0.0477591	-0.537046	-0.053924	0.110516	0.133892
105.8	0.370681	1.18786	-0.262535	-0.520233	-0.159256	-0.369865	-0.0736094	0.178473	-0.292851	-0.0969426	-0.0592226	-0.524542	-0.0390194	0.114616	0.132328
105.9	0.363029	1.39615	-0.249109	-0.514208	-0.152567	-0.361764	-0.0508622	0.175918	-0.290617	-0.0881073	-0.0703139	-0.509938	-0.0235115	0.117338	0.130482
106	0.355407	1.57263	-0.233948	-0.505442	-0.146958	-0.350987	-0.0294501	0.173328	-0.286497	-0.0787625	-0.081024	-0.493491	-0.00793713	0.118486	0.128502
106.1	0.347823	1.71742	-0.217074	-0.494261	-0.142502	-0.337659	-0.00950865	0.170712	-0.280399	-0.0689351	-0.0913068	-0.475408	0.00719731	0.117864	0.126583
106.2	0.34027	1.83152	-0.198614	-0.481117	-0.139209	-0.321965	0.00890254	0.168017	-0.272336	-0.0586862	-0.101092	-0.455963	0.0214736	0.115395	0.124867
106.3	0.332718	1.91659	-0.178774	-0.466511	-0.136977	-0.304156	0.0257789	0.165245	-0.262341	-0.0481168	-0.110265	-0.435398	0.0344415	0.110947	0.123474
106.4	0.325166	1.97484	-0.157833	-0.450954	-0.135659	-0.284506	0.0412114	0.162422	-0.250511	-0.0373246	-0.118676	-0.414011	0.0458064	0.104499	0.122475
106.5	0.317601	2.00881	-0.136156	-0.434973	-0.135088	-0.263369	0.0553145	0.159544	-0.236987	-0.0264539	-0.126151	-0.392054	0.0553333	0.096003	0.121872
106.6	0.310024	2.02129	-0.11414	-0.419102	-0.135106	-0.241118	0.0682961	0.156663	-0.221934	-0.0156194	-0.132474	-0.369773	0.0628545	0.0855132	0.121639
106.7	0.302458	2.01517	-0.0922415	-0.403818	-0.135582	-0.218201	0.080331	0.153795	-0.205614	-0.00492037	-0.137407	-0.347414	0.0683794	0.0730969	0.121731
106.8	0.294905	1.99328	-0.0709097	-0.389549	-0.136379	-0.195051	0.091594	0.150976	-0.188255	0.00554599	-0.140709	-0.325193	0.0719012	0.0589315	0.122017
106.9	0.287415	1.95839	-0.050625	-0.376661	-0.137419	-0.172081	0.102312	0.148245	-0.170194	0.0156763	-0.14214	-0.303345	0.0735491	0.0432212	0.122402
107	0.280036	1.91299	-0.0318052	-0.365419	-0.138642	-0.149752	0.112663	0.145628	-0.151738	0.0253626	-0.141484	-0.282017	0.0734845	0.0262107	0.122635
107.1	0.272847	1.8594	-0.0148565	-0.356012	-0.140096	-0.128454	0.122766	0.143139	-0.133238	0.0345262	-0.138539	-0.261352	0.0719531	0.00820205	0.122555
107.2	0.265935	1.79965	-6.50426e-05	-0.348503	-0.14188	-0.108547	0.132757	0.140798	-0.115033	0.0430738	-0.133182	-0.241443	0.0691666	-0.0104513	0.121941
107.3	0.259388	1.73547	0.0122927	-0.342874	-0.144112	-0.0903373	0.142673	0.138607	-0.097451	0.0509671	-0.125343	-0.222334	0.0653614	-0.0293373	0.12064
107.4	0.253332	1.66831	0.0220736	-0.338968	-0.147007	-0.07406	0.152483	0.136558	-0.0808204	0.0581601	-0.115068	-0.203995	0.0608183	-0.0480555	0.118504
107.5	0.247866	1.59938	0.0291841	-0.336588	-0.150797	-0.0598711	0.162117	0.134593	-0.0654371	0.0646077	-0.102476	-0.186332	0.0557124	-0.0661722	0.115418
107.6	0.243116	1.5296	0.0336817	-0.33544	-0.155725	-0.0478546	0.171417	0.132659	-0.0515683	0.0702714	-0.0877708	-0.16925	0.0501808	-0.0832901	0.111294
107.7	0.23919	1.45976	0.0356844	-0.33515	-0.162035	-0.038005	0.180173	0.130694	-0.0394446	0.0751721	-0.071284	-0.152586	0.0443737	-0.09901	0.10611
107.8	0.236175	1.39036	0.0354097	-0.335306	-0.169872	-0.0302324	0.188154	0.128587	-0.0291921	0.0793271	-0.0534144	-0.136131	0.0383144	-0.112969	0.0998689
107.9	0.234128	1.3218	0.0331495	-0.335461	-0.179349	-0.0244054	0.195085	0.126286	-0.0209003	0.0827721	-0.0346995	-0.119667	0.0320305	-0.124808	0.0926324
108	0.233086	1.25434	0.0293177	-0.335173	-0.190462	-0.020295	0.200645	0.123693	-0.0146056	0.0855538	-0.0156778	-0.102916	0.0254999	-0.13425	0.0845033
108.1	0.233052	1.18811	0.0243509	-0.333984	-0.203163	-0.0176608	0.204544	0.120712	-0.0102888	0.0877594	0.00305008	-0.085605	0.0186999	-0.14107	0.0756532
108.2	0.234007	1.12323	0.0187624	-0.331514	-0.217299	-0.0162072	0.206485	0.117275	-0.00786395	0.0894939	0.0208587	-0.0674703	0.0115772	-0.145142	0.0663072
108.3	0.235878	1.05978	0.0130461	-0.327429	-0.232589	-0.0156406	0.206226	0.113335	-0.00716728	0.0908584	0.0371871	-0.048317	0.00407578	-0.146444	0.0566884
108.4	0.238563	0.997637	0.00772838	-0.321466	-0.248627	-0.0156826	0.20355	0.108894	-0.00802319	0.092009	0.0515361	-0.0279812	-0.0038117	-0.144992	0.0470411
108.5	0.241945	0.936598	0.00327663	-0.313387	-0.264893	-0.0160601	0.198309	0.103947	-0.0101875	0.0930874	0.0634434	-0.00632747	-0.0121388	-0.140926	0.0376283
108.6	0.245865	0.876473	0.000165747	-0.303078	-0.2808	-0.0165406	0.19042	0.0985318	-0.0133895	0.0942611	0.0725544	0.0167224	-0.0208797	-0.134488	0.0286714
108.7	0.250162	0.817101	-0.00123615	-0.290508	-0.295743	-0.016943	0.179903	0.0926561	-0.0173161	0.0956657	0.0786061	0.041178	-0.0300357	-0.126042	0.0204545
108.8	0.254625	0.758427	-0.000618174	-0.275736	-0.309044	-0.0171336	0.166839	0.0864017	-0.0216682	0.0973964	0.0814687	0.0669517	-0.039484	-0.115992	0.0131761
108.9	0.259076	0.700416	0.00224094	-0.258873	-0.320063	-0.0170249	0.151419	0.07987	-0.026129	0.0995235	0.0811273	0.0938545	-0.0491087	-0.104812	0.00709546
109	0.263334	0.642999	0.00740413	-0.240126	-0.328153	-0.0166185	0.133906	0.0731526	-0.0303952	0.102114	0.0776727	0.121621	-0.0587105	-0.0930483	0.00235952
109.1	0.267235	0.586145	0.0148409	-0.219763	-0.332783	-0.0159298	0.114563	0.0663586	-0.0342133	0.105195	0.0712885	0.149958	-0.0680851	-0.0812738	-0.000842922
109.2	0.270635	0.529775	0.0244291	-0.198091	-0.333505	-0.0150084	0.0937442	0.0595598	-0.0373197	0.108732	0.0622416	0.178496	-0.0769845	-0.0700485	-0.00242411
109.3	0.273407	0.47387	0.035919	-0.175411	-0.329952	-0.0139325	0.0718136	0.0528443	-0.0395108	0.112651	0.0508659	0.206844	-0.0851498	-0.0599429	-0.00235354
109.4	0.27548	0.41842	0.0489614	-0.152033	-0.321857	-0.0128148	0.0491812	0.0462797	-0.0406032	0.116846	0.0375392	0.234575	-0.0922937	-0.0514375	-0.000598781
109.5	0.276801	0.363439	0.0630739	-0.128296	-0.309131	-0.0117618	0.0262054	0.0399137	-0.0405055	0.121119	0.0226616	0.261247	-0.0981736	-0.0449589	0.00278676
109.6	0.277377	0.309131	0.0777052	-0.104536	-0.291842	-0.0108519	0.00323915	0.0337535	-0.039105	0.125272	0.00662233	0.286444	-0.102577	-0.0408175	0.00774587
109.7	0.277229	0.25629	0.0922811	-0.0810355	-0.270243	-0.0101556	-0.0194378	0.0277872	-0.0363864	0.129108	-0.0102256	0.309717	-0.105281	-0.0392873	0.0141584
109.8	0.276426	0.205394	0.106211	-0.058052	-0.244731	-0.00970721	-0.0416086	0.0220387	-0.0323557	0.132355	-0.0275924	0.330715	-0.106127	-0.0404579	0.0218374
109.9	0.275063	0.156103	0.118908	-0.0357779	-0.215813	-0.00951077	-0.0631043	0.0165012	-0.0270833	0.134751	-0.0452201	0.349136	-0.105013	-0.0442931	0.0306264
110	0.273252	0.108299	0.12985	-0.014387	-0.184169	-0.00948966	-0.0838695	0.0111566	-0.0207218	0.135998	-0.0628577	0.364741	-0.101934	-0.0505537	0.0403386
110.1	0.27113	0.0623474	0.138552	0.00602352	-0.150548	-0.009562	-0.103832	0.00598247	-0.0134524	0.13583	-0.0803102	0.377368	-0.0968702	-0.0589359	0.0507356
110.2	0.268838	0.0189762	0.144636	0.0253411	-0.115794	-0.00960001	-0.12303	0.000946026	-0.0055363	0.133977	-0.0974405	0.386912	-0.0899332	-0.0690253	0.0616189
110.3	0.266508	-0.0210114	0.147823	0.0435258	-0.0808412	-0.00943203	-0.141512	-0.00395508	0.00275353	0.130266	-0.114151	0.393328	-0.0812275	-0.0803029	0.0728093
110.4	0.264279	-0.0568309	0.148012	0.0605775	-0.0465745	-0.00891516	-0.159397	-0.00871915	0.0111578	0.124537	-0.130404	0.396663	-0.0709684	-0.0921681	0.0841523
110.5	0.262263	-0.0876098	0.145178	0.0764676	-0.0138711	-0.00782592	-0.176792	-0.0133285	0.0193141	0.116691	-0.146138	0.397067	-0.0593993	-0.103992	0.0954667
110.6	0.260571	-0.112459	0.139475	0.0912343	0.0164091	-0.00599855	-0.193813	-0.0177097	0.0268772	0.106682	-0.161347	0.394768	-0.0467674	-0.115127	0.106651
110.7	0.259277	-0.130336	0.131147	0.104834	0.0435175	-0.00326709	-0.210544	-0.0218434	0.0335154	0.0945462	-0.175981	0.390043	-0.0333841	-0.125014	0.117603
110.8	0.258443	-0.140106	0.120544	0.117268	0.0667787	0.000482894	-0.227033	-0.0256469	0.0389366	0.08032	-0.190057	0.383247	-0.0195553	-0.133038	0.128246
110.9	0.258103	-0.140533	0.108127	0.128552	0.0856578	0.00535233	-0.243303	-0.0290281	0.0429024	0.0641213	-0.203544	0.37475	-0.00563023	-0.138717	0.138519
111	0.258269	-0.130269	0.0944231	0.138634	0.0998037	0.0113702	-0.259324	-0.0319184	0.0452299	0.0461262	-0.216404	0.364963	0.00810225	-0.141673	0.148373
111.1	0.258942	-0.107907	0.0799749	0.147459	0.108986	0.018519	-0.274976	-0.0342087	0.0458179	0.0265442	-0.228584	0.354308	0.0213075	-0.14167	0.15778
111.2	0.260094	-0.0720168	0.0653494	0.154926	0.113167	0.0267341	-0.290107	-0.0358329	0.0446683	0.00564227	-0.240017	0.343199	0.033755	-0.138566	0.166702
111.3	0.261684	-0.0212337	0.0510881	0.161034	0.112447	0.0358857	-0.304529	-0.0366866	0.0418612	-0.0162896	-0.250667	0.332094	0.0451712	-0.132359	0.175099
111.4	0.263659	0.0457377	0.0376795	0.165674	0.107031	0.0458154	-0.317954	-0.0367181	0.037593	-0.0389199	-0.260421	0.321392	0.0554	-0.123169	0.182915
111.5	0.265975	0.130054	0.025564	0.168789	0.0972942	0.056262	-0.330134	-0.0358938	0.0321461	-0.0619199	-0.269241	0.311492	0.0642823	-0.111308	0.190067
111.6	0.268562	0.232538	0.0150297	0.170303	0.0837074	0.0669967	-0.340764	-0.0341734	0.0258867	-0.0849561	-0.277067	0.302712	0.0717916	-0.0971513	0.196438
111.7	0.271362	0.353715	0.00627117	0.1702	0.0668247	0.0777181	-0.349574	-0.031559	0.0192612	-0.107733	-0.283867	0.295349	0.0778548	-0.081211	0.201912
111.8	0.274307	0.493572	-0.000673487	0.168526	0.0472554	0.0881381	-0.356313	-0.0280649	0.0127404	-0.129993	-0.289639	0.289598	0.0824908	-0.0640253	0.206333
111.9	0.277338	0.65156	-0.00580235	0.165327	0.0256425	0.0979285	-0.360816	-0.0237333	0.00682624	-0.151517	-0.294388	0.285623	0.085744	-0.046254	0.209583
112	0.280385	0.826401	-0.00930615	0.160744	0.00263604	0.10684	-0.362908	-0.0186647	0.00201449	-0.172094	-0.298186	0.283502	0.0877012	-0.028545	0.211502
112.1	0.283379	1.01603	-0.0113794	0.154915	-0.0211294	0.114551	-0.362553	-0.0129655	-0.00121798	-0.19152	-0.301084	0.283284	0.0884575	-0.0115156	0.211941
112.2	0.286263	1.21754	-0.0123732	0.148041	-0.0450922	0.120834	-0.35974	-0.00678009	-0.00250102	-0.209654	-0.303243	0.284939	0.0881411	0.00421477	0.210762
112.3	0.288944	1.4271	-0.0126287	0.140383	-0.0687269	0.125483	-0.354602	-0.000253817	-0.00153923	-0.226366	-0.304783	0.288423	0.0868908	0.0181218	0.207863
112.4	0.291364	1.64004	-0.0125696	0.132172	-0.0915835	0.128345	-0.347333	0.00644623	0.00186015	-0.241603	-0.305889	0.293598	0.0848824	0.0297552	0.203159
112.5	0.293429	1.85081	-0.0125868	0.123652	-0.113302	0.129274	-0.338219	0.0130931	0.00775816	-0.255309	-0.306767	0.300323	0.0822207	0.0387515	0.196644
112.6	0.295062	2.05322	-0.0130884	0.115111	-0.13357	0.128241	-0.327605	0.0194599	0.0161281	-0.267502	-0.307602	0.308415	0.0791031	0.044867	0.188339
112.7	0.296158	2.24051	-0.0144255	0.106794	-0.152167	0.12518	-0.315887	0.0252662	0.0267526	-0.278245	-0.308648	0.317675	0.075587	0.0479421	0.178307
112.8	0.296623	2.40564	-0.0168783	0.09894	-0.168937	0.120129	-0.303525	0.0302924	0.0393283	-0.287636	-0.310075	0.327862	0.0718894	0.0479846	0.166702
112.9	0.296334	2.54145	-0.0206205	0.091755	-0.183788	0.113102	-0.290993	0.0342869	0.0534527	-0.29578	-0.312099	0.338781	0.0680669	0.0451031	0.153687
113	0.2952	2.64115	-0.0257971	0.0854035	-0.196675	0.104201	-0.278723	0.0369937	0.0686261	-0.302837	-0.314863	0.350211	0.064245	0.0395654	0.13953
113.1	0.293113	2.69849	-0.0323946	0.0800401	-0.207597	0.0934799	-0.267115	0.038211	0.0842936	-0.308968	-0.318519	0.361975	0.0604778	0.0316905	0.124455
113.2	0.289977	2.70824	-0.0403025	0.0757276	-0.216569	0.0810594	-0.256509	0.0377022	0.0998658	-0.314308	-0.323189	0.373877	0.0568731	0.0218815	0.108715
113.3	0.285693	2.66637	-0.0493681	0.0724641	-0.223657	0.0670768	-0.24718	0.0353097	0.114765	-0.319041	-0.32894	0.385717	0.0534981	0.0105657	0.0925866
113.4	0.280198	2.57042	-0.0592844	0.0702268	-0.228924	0.0516368	-0.239335	0.0308985	0.128458	-0.323384	-0.335856	0.39731	0.0503835	-0.00175522	0.0763723
113.5	0.27343	2.41963	-0.0697557	0.0690023	-0.232487	0.034898	-0.233027	0.0244114	0.140435	-0.327537	-0.343953	0.408496	0.0476253	-0.0146477	0.0603505
113.6	0.265343	2.2152	-0.0803854	0.0687219	-0.234465	0.016992	-0.228262	0.0158436	0.150311	-0.331664	-0.353162	0.41911	0.045201	-0.0276439	0.0447847
113.7	0.255933	1.96015	-0.0907805	0.0693513	-0.234946	-0.00194407	-0.22491	0.00522051	0.157733	-0.335964	-0.363386	0.429039	0.0431911	-0.0403367	0.0298807
113.8	0.245206	1.65949	-0.100514	0.0708028	-0.234043	-0.0217937	-0.222758	-0.00734098	0.162478	-0.340583	-0.374453	0.438152	0.0415955	-0.0524193	0.0158445
113.9	0.2332	1.31986	-0.109181	0.0730001	-0.231812	-0.0424026	-0.221526	-0.0216714	0.164424	-0.345631	-0.386158	0.446319	0.04038	-0.0635939	0.00281728
114	0.219983	0.949436	-0.1164	0.0759202	-0.228358	-0.0636217	-0.220784	-0.0375426	0.163568	-0.351183	-0.398274	0.453448	0.0395243	-0.0736921	-0.00908267
114.1	0.20562	0.55748	-0.121878	0.0794965	-0.223775	-0.0852929	-0.220076	-0.054653	0.160028	-0.357301	-0.410498	0.459414	0.0390049	-0.0826504	-0.0197753
114.2	0.19024	0.154039	-0.125368	0.0837384	-0.218136	-0.107227	-0.218922	-0.0726975	0.154005	-0.364026	-0.422551	0.464157	0.0387381	-0.090512	-0.0292052
114.3	0.173955	-0.250573	-0.126675	0.0886136	-0.21155	-0.129251	-0.216801	-0.091301	0.145812	-0.371307	-0.434127	0.467607	0.0386554	-0.0973646	-0.0373439
114.4	0.156913	-0.646091	-0.125738	0.0941354	-0.204091	-0.151167	-0.213246	-0.110079	0.13585	-0.37906	-0.444892	0.469718	0.0386492	-0.103372	-0.0442237
114.5	0.139271	-1.02289	-0.122589	0.100281	-0.195811	-0.172723	-0.207756	-0.128652	0.124534	-0.387152	-0.45455	0.470483	0.0386338	-0.108712	-0.049837
114.6	0.121181	-1.37221	-0.117352	0.107008	-0.186779	-0.193714	-0.199938	-0.146628	0.112334	-0.395426	-0.462799	0.469914	0.0385037	-0.113588	-0.0542315
114.7	0.10281	-1.68661	-0.110228	0.114292	-0.177051	-0.213849	-0.189459	-0.16369	0.0997857	-0.40372	-0.469351	0.468065	0.0380864	-0.118215	-0.0574244
114.8	0.0843104	-1.96011	-0.101547	0.122032	-0.166703	-0.232881	-0.1761	-0.179506	0.0874361	-0.411852	-0.473984	0.465044	0.0373105	-0.122819	-0.0594844
114.9	0.0658397	-2.18846	-0.0916693	0.130137	-0.155771	-0.250516	-0.159737	-0.193795	0.0758227	-0.419647	-0.476527	0.460925	0.0360572	-0.127577	-0.0604571
115	0.0475451	-2.36911	-0.081032	0.138498	-0.144334	-0.266513	-0.140316	-0.206365	0.0654988	-0.426919	-0.476855	0.455804	0.0342122	-0.132674	-0.0603884
115.1	0.0295657	-2.50128	-0.0700991	0.147001	-0.13249	-0.280622	-0.117948	-0.217032	0.0569333	-0.433487	-0.47492	0.449742	0.0317379	-0.138251	-0.0592879
115.2	0.0120314	-2.58576	-0.0593721	0.155439	-0.120317	-0.292619	-0.0928767	-0.225708	0.050613	-0.439187	-0.470724	0.442865	0.0285648	-0.144382	-0.0572032
115.3	-0.00494935	-2.62482	-0.0493261	0.163576	-0.107923	-0.302319	-0.0654299	-0.232355	0.0468941	-0.443896	-0.464346	0.435316	0.0247114	-0.151122	-0.054201
115.4	-0.0212824	-2.62189	-0.0404207	0.171179	-0.0953914	-0.309556	-0.036047	-0.236989	0.0461527	-0.447476	-0.455914	0.427177	0.0202263	-0.158408	-0.0503272
115.5	-0.0368734	-2.58138	-0.0330908	0.178021	-0.0828449	-0.314252	-0.00522219	-0.239688	0.0486251	-0.449842	-0.445632	0.418565	0.015173	-0.166215	-0.0455989
115.6	-0.0516614	-2.50836	-0.0277044	0.183876	-0.0704155	-0.316355	0.0264476	-0.240558	0.054464	-0.450946	-0.433743	0.409552	0.00967219	-0.174449	-0.040058
115.7	-0.0655737	-2.4083	-0.0245459	0.188469	-0.0582264	-0.315872	0.0583151	-0.239763	0.0636732	-0.450813	-0.42052	0.400255	0.00384447	-0.183054	-0.0337676
115.8	-0.0785551	-2.28674	-0.0238134	0.191568	-0.0464093	-0.312855	0.0896911	-0.237468	0.0761554	-0.449472	-0.40624	0.390695	-0.00213078	-0.191917	-0.0268096
115.9	-0.0905569	-2.14919	-0.0256426	0.19294	-0.0350909	-0.307423	0.119864	-0.233825	0.0917256	-0.447005	-0.391178	0.380929	-0.00809019	-0.200944	-0.0192164
116	-0.101537	-2.00081	-0.0300543	0.192415	-0.0244241	-0.299732	0.148173	-0.229017	0.110054	-0.443525	-0.375654	0.370973	-0.0138234	-0.210011	-0.0110797
116.1	-0.111472	-1.84634	-0.0369398	0.189894	-0.01456	-0.28998	0.173979	-0.2232	0.130707	-0.43917	-0.359885	0.360833	-0.0191514	-0.219013	-0.00246798
116.2	-0.120331	-1.68995	-0.0461237	0.185274	-0.00561728	-0.278415	0.196745	-0.216544	0.153148	-0.434075	-0.3441	0.350517	-0.0238346	-0.227816	0.00650037
116.3	-0.128104	-1.53519	-0.0573542	0.178597	0.00227072	-0.265293	0.215973	-0.209201	0.176736	-0.428423	-0.328498	0.340007	-0.0276843	-0.236342	0.0157529
116.4	-0.134789	-1.38499	-0.0702784	0.16989	0.0089981	-0.250921	0.231308	-0.201294	0.200767	-0.422416	-0.313258	0.329301	-0.0305121	-0.244476	0.0252248
116.5	-0.140395	-1.24167	-0.0844862	0.159283	0.0144464	-0.235574	0.242491	-0.192951	0.224488	-0.416262	-0.298509	0.318423	-0.0321292	-0.252085	0.0348378
116.6	-0.144941	-1.10693	-0.0995581	0.146927	0.0185341	-0.219552	0.249381	-0.184274	0.247115	-0.410158	-0.284307	0.307379	-0.0323757	-0.259012	0.0445463
116.7	-0.148442	-0.982016	-0.114996	0.133091	0.0211873	-0.203141	0.251917	-0.175349	0.267906	-0.404277	-0.270672	0.296194	-0.0311179	-0.265083	0.0542833
116.8	-0.150951	-0.867617	-0.130333	0.118086	0.0223119	-0.18661	0.250197	-0.166271	0.286112	-0.398769	-0.257586	0.284929	-0.0283007	-0.270175	0.063984
116.9	-0.152535	-0.764108	-0.145025	0.102207	0.0218495	-0.170219	0.244416	-0.157128	0.301112	-0.393772	-0.245036	0.273679	-0.0238546	-0.274138	0.0736047
117	-0.153285	-0.671537	-0.158674	0.0858327	0.0197467	-0.154172	0.23486	-0.14805	0.312383	-0.389417	-0.232932	0.262584	-0.0177991	-0.276878	0.0831109
117.1	-0.153294	-0.589685	-0.170841	0.0693284	0.0160008	-0.138699	0.22194	-0.139111	0.319509	-0.385759	-0.221194	0.251713	-0.0101648	-0.278277	0.0924531
117.2	-0.152673	-0.518163	-0.181204	0.0530645	0.010606	-0.123997	0.206135	-0.130433	0.322216	-0.382825	-0.209688	0.241167	-0.00098649	-0.278292	0.101578
117.3	-0.151544	-0.456436	-0.189467	0.0373517	0.00351847	-0.110249	0.18793	-0.12214	0.320384	-0.380629	-0.198313	0.231063	0.00957167	-0.276895	0.110485
117.4	-0.150053	-0.40389	-0.19544	0.0224839	-0.00524946	-0.0975862	0.167891	-0.114347	0.314101	-0.379122	-0.187002	0.221484	0.0214292	-0.274133	0.119156
117.5	-0.148342	-0.359849	-0.199017	0.00873767	-0.0157027	-0.0861057	0.146601	-0.107229	0.303577	-0.378188	-0.175665	0.212535	0.0343528	-0.270076	0.127575
117.6	-0.146552	-0.323649	-0.200169	-0.0036887	-0.0277493	-0.0759204	0.124654	-0.100877	0.289172	-0.377711	-0.164221	0.204281	0.0481085	-0.264884	0.135685
117.7	-0.144819	-0.294824	-0.198967	-0.0147132	-0.0412847	-0.0670949	0.102648	-0.0954454	0.271375	-0.377571	-0.152593	0.19677	0.0624023	-0.258721	0.143467
117.8	-0.143281	-0.27247	-0.195566	-0.0242976	-0.0561637	-0.0596885	0.0811372	-0.0910549	0.250772	-0.377572	-0.140714	0.190006	0.0769737	-0.251852	0.150913
117.9	-0.142043	-0.255297	-0.190188	-0.0324744	-0.0722025	-0.0537395	0.0607192	-0.0878133	0.228039	-0.377522	-0.128528	0.183967	0.091455	-0.244592	0.157951
118	-0.141197	-0.242383	-0.183094	-0.0393084	-0.0892017	-0.0492648	0.0419377	-0.0858332	0.203906	-0.37722	-0.116062	0.178599	0.105553	-0.237305	0.164463
118.1	-0.140796	-0.233189	-0.17466	-0.0449771	-0.106888	-0.0462796	0.0252467	-0.0851647	0.179128	-0.376498	-0.103327	0.173767	0.11891	-0.230335	0.170441
118.2	-0.140868	-0.227229	-0.165215	-0.0496882	-0.124959	-0.0447937	0.0111166	-0.0858719	0.154436	-0.375201	-0.0903933	0.169361	0.131184	-0.224021	0.175793
118.3	-0.141406	-0.223906	-0.155171	-0.0537566	-0.143056	-0.0447726	-9.84973e-05	-0.0879487	0.130486	-0.37321	-0.0773112	0.165216	0.142081	-0.218621	0.180397
118.4	-0.142355	-0.222559	-0.144911	-0.0575007	-0.160834	-0.0461897	-0.00809014	-0.0913724	0.10789	-0.370479	-0.0641543	0.161119	0.151293	-0.214411	0.184097
118.5	-0.143646	-0.222492	-0.134814	-0.0612353	-0.177923	-0.0490163	-0.012599	-0.0961224	0.0871879	-0.36701	-0.0510397	0.15684	0.158579	-0.211579	0.186772
118.6	-0.145169	-0.223019	-0.12521	-0.0652064	-0.193932	-0.0532104	-0.0134381	-0.10213	0.0687825	-0.362873	-0.0380491	0.152172	0.163747	-0.210245	0.188286
118.7	-0.146779	-0.22357	-0.116421	-0.0696277	-0.208502	-0.0586767	-0.0104974	-0.109308	0.052975	-0.35818	-0.0253083	0.146887	0.166617	-0.21042	0.188492
118.8	-0.148345	-0.22356	-0.108677	-0.0747432	-0.221252	-0.0653695	-0.00378526	-0.117525	0.0399063	-0.353067	-0.0129204	0.14076	0.167076	-0.212035	0.187245
118.9	-0.149684	-0.222564	-0.102177	-0.080696	-0.231859	-0.0731553	0.00663473	-0.126629	0.02959	-0.347755	-0.000959443	0.133649	0.165064	-0.214917	0.184437
119	-0.150651	-0.220165	-0.0970594	-0.0875815	-0.240086	-0.0819595	0.0205852	-0.136465	0.0218924	-0.34249	0.0104385	0.125384	0.160616	-0.218788	0.179901
119.1	-0.151086	-0.216066	-0.0934031	-0.095415	-0.245706	-0.0916773	0.0377858	-0.146841	0.0166153	-0.337555	0.0211957	0.115862	0.15376	-0.223313	0.173573
119.2	-0.150854	-0.21002	-0.0912134	-0.10416	-0.248603	-0.102139	0.057906	-0.157586	0.0134211	-0.333278	0.0312718	0.105043	0.144606	-0.228125	0.165402
119.3	-0.149856	-0.201872	-0.0904867	-0.113773	-0.248755	-0.113209	0.0805349	-0.168509	0.0119262	-0.329977	0.0406576	0.0929142	0.133294	-0.232843	0.155422
119.4	-0.148016	-0.191512	-0.09112	-0.124145	-0.246174	-0.12471	0.105157	-0.179354	0.0116291	-0.327908	0.0493761	0.079507	0.119967	-0.237018	0.143742
119.5	-0.145314	-0.178939	-0.0930502	-0.135118	-0.240978	-0.136425	0.131257	-0.189915	0.0120054	-0.327348	0.0574877	0.0649479	0.104805	-0.240188	0.130516
119.6	-0.141776	-0.164226	-0.0960981	-0.146509	-0.233389	-0.148121	0.158214	-0.199945	0.0125075	-0.328459	0.065071	0.0493491	0.0880682	-0.241981	0.115963
119.7	-0.137475	-0.147496	-0.100105	-0.158178	-0.223633	-0.159559	0.185435	-0.209252	0.0125806	-0.331354	0.0722175	0.0329303	0.0699688	-0.242049	0.100384
119.8	-0.132547	-0.128959	-0.104878	-0.169971	-0.212048	-0.170467	0.212281	-0.217591	0.0117285	-0.336087	0.0790512	0.0159088	0.0507892	-0.24012	0.0841028
119.9	-0.127138	-0.108851	-0.11026	-0.18174	-0.199003	-0.180574	0.238172	-0.224769	0.00948591	-0.342621	0.085725	-0.00148281	0.0308034	-0.235964	0.0674955
120	-0.12144	-0.087485	-0.116095	-0.193376	-0.184905	-0.189617	0.262493	-0.230585	0.00543519	-0.350849	0.0923756	-0.0189888	0.0102737	-0.229489	0.0509549
120.1	-0.115671	-0.0651996	-0.122261	-0.204815	-0.170194	-0.197326	0.28475	-0.234841	-0.000734594	-0.360576	0.0991787	-0.0363881	-0.0104936	-0.220714	0.0349618
120.2	-0.110051	-0.0423839	-0.12863	-0.216017	-0.155245	-0.203473	0.304456	-0.237436	-0.00928464	-0.371533	0.106293	-0.053423	-0.0311716	-0.209752	0.0200044
120.3	-0.104848	-0.019429	-0.135113	-0.226974	-0.14043	-0.207826	0.321229	-0.238253	-0.0203315	-0.383392	0.113786	-0.0698647	-0.0514809	-0.196755	0.00650991
120.4	-0.100281	0.00325568	-0.14164	-0.237675	-0.126096	-0.210214	0.334762	-0.237193	-0.0339419	-0.395776	0.121736	-0.0855073	-0.0710956	-0.181973	-0.0051726
120.5	-0.0965885	0.0252684	-0.14819	-0.248127	-0.112566	-0.210498	0.344806	-0.23422	-0.0500356	-0.408245	0.130103	-0.1002	-0.0896588	-0.165721	-0.0147055
120.6	-0.0939575	0.0462587	-0.154749	-0.258386	-0.100098	-0.208638	0.351232	-0.229289	-0.0685001	-0.42036	0.138854	-0.113806	-0.106859	-0.148367	-0.0218791
120.7	-0.0925411	0.0658738	-0.161352	-0.268474	-0.0888834	-0.204591	0.353988	-0.222425	-0.0890989	-0.431674	0.147868	-0.126207	-0.122298	-0.130266	-0.026533
120.8	-0.0924626	0.0838391	-0.168068	-0.278414	-0.0790375	-0.198466	0.353137	-0.213672	-0.111491	-0.441795	0.156971	-0.137351	-0.135728	-0.111808	-0.0286254
120.9	-0.0937916	0.0999453	-0.174996	-0.288172	-0.0706107	-0.190366	0.348785	-0.203073	-0.135305	-0.450365	0.165909	-0.147183	-0.146783	-0.0933578	-0.0281981
121	-0.0965454	0.114083	-0.182219	-0.297705	-0.0635993	-0.180537	0.341129	-0.19076	-0.160108	-0.457057	0.174383	-0.155685	-0.155169	-0.0752826	-0.0254344
121.1	-0.100713	0.126189	-0.189892	-0.306972	-0.0579448	-0.169232	0.330423	-0.176804	-0.185441	-0.461683	0.18206	-0.162876	-0.160602	-0.0578509	-0.0205725
121.2	-0.106207	0.136368	-0.198069	-0.315872	-0.0535244	-0.15683	0.316949	-0.161358	-0.210829	-0.464088	0.188566	-0.168743	-0.16292	-0.0412793	-0.0139807
121.3	-0.112928	0.144781	-0.206869	-0.324282	-0.050172	-0.143696	0.301036	-0.144581	-0.235765	-0.464239	0.193551	-0.173298	-0.161995	-0.0257282	-0.00603854
121.4	-0.120713	0.151717	-0.216387	-0.332056	-0.0477009	-0.130257	0.283067	-0.126663	-0.259784	-0.462139	0.196662	-0.176509	-0.157765	-0.0112585	0.00278295
121.5	-0.129385	0.157551	-0.226696	-0.339115	-0.045867	-0.116961	0.263395	-0.107829	-0.282449	-0.457883	0.197552	-0.178321	-0.150244	0.00213042	0.0119954
121.6	-0.138731	0.162686	-0.237875	-0.345343	-0.0444735	-0.104235	0.242407	-0.0882621	-0.303335	-0.451628	0.195984	-0.178737	-0.139556	0.0144181	0.0210821
121.7	-0.148536	0.167622	-0.249918	-0.350696	-0.0432889	-0.0924966	0.220451	-0.0682022	-0.322086	-0.443613	0.191765	-0.17771	-0.125808	0.0256929	0.0295316
121.8	-0.158586	0.17285	-0.26284	-0.355108	-0.0421024	-0.0821358	0.197845	-0.0478571	-0.338405	-0.434081	0.184814	-0.175164	-0.109318	0.0359703	0.0368902
121.9	-0.168655	0.178876	-0.276566	-0.358545	-0.0407642	-0.0735088	0.174942	-0.0274437	-0.352072	-0.423344	0.175189	-0.171077	-0.0904354	0.0453892	0.0427152
122	-0.178537	0.186225	-0.29102	-0.361044	-0.0391258	-0.0668997	0.151978	-0.00721459	-0.362936	-0.411678	0.163045	-0.16541	-0.0696097	0.0540746	0.0466672
122.1	-0.188024	0.195367	-0.306078	-0.362713	-0.0371334	-0.0625337	0.129206	0.0125889	-0.370918	-0.3993	0.148656	-0.158184	-0.0473132	0.0621165	0.0484296
122.2	-0.196948	0.206697	-0.321591	-0.363659	-0.0347986	-0.0605346	0.106859	0.03172	-0.376018	-0.386412	0.132388	-0.149424	-0.024075	0.0695862	0.0477773
122.3	-0.205156	0.220533	-0.33738	-0.364038	-0.0321301	-0.060956	0.0850906	0.0499389	-0.378333	-0.373189	0.114758	-0.139187	-0.000473697	0.0765142	0.0446168
122.4	-0.212532	0.237001	-0.353264	-0.36404	-0.0292241	-0.063737	0.0640927	0.0670416	-0.377994	-0.359736	0.0963078	-0.127625	0.0228521	0.0828853	0.0388681
122.5	-0.218978	0.256179	-0.368992	-0.363834	-0.0262181	-0.0687703	0.043976	0.0828089	-0.375217	-0.3461	0.0776956	-0.1149	0.0453246	0.0886868	0.0306341
122.6	-0.224419	0.277929	-0.384319	-0.363598	-0.0233436	-0.0758617	0.0248855	0.0971121	-0.370299	-0.332269	0.0595602	-0.101219	0.0663344	0.0938676	0.0200178
122.7	-0.228814	0.302028	-0.398997	-0.363493	-0.0208581	-0.0847536	0.00696555	0.109783	-0.363564	-0.318154	0.0425158	-0.0868723	0.0853356	0.0983695	0.00729001
122.8	-0.232148	0.328016	-0.412815	-0.363666	-0.0190364	-0.0951219	-0.00966066	0.120707	-0.35539	-0.303613	0.0271937	-0.0721612	0.101802	0.10211	-0.0072211
122.9	-0.234402	0.355364	-0.425537	-0.364241	-0.018156	-0.10664	-0.0248773	0.129825	-0.346202	-0.288486	0.0141265	-0.0574464	0.115294	0.105006	-0.0230864
123	-0.2356	0.383392	-0.436962	-0.36527	-0.0184317	-0.118918	-0.038572	0.137056	-0.336407	-0.272637	0.0037597	-0.0430711	0.125416	0.106961	-0.0399092
123.1	-0.235767	0.411287	-0.446875	-0.366793	-0.0200575	-0.131592	-0.0506282	0.142416	-0.326443	-0.255926	-0.00358392	-0.0294016	0.131814	0.107869	-0.0571726
123.2	-0.234943	0.438187	-0.455105	-0.368778	-0.0232588	-0.144316	-0.0609321	0.145933	-0.316715	-0.238276	-0.0076965	-0.0168211	0.134285	0.107709	-0.0743483
123.3	-0.233176	0.463118	-0.461474	-0.371164	-0.0281815	-0.156752	-0.0693643	0.147647	-0.307607	-0.219664	-0.0085189	-0.00572069	0.1327	0.10646	-0.0909003
123.4	-0.230514	0.485116	-0.465872	-0.373932	-0.034921	-0.168577	-0.0758225	0.147679	-0.299456	-0.200105	-0.00615952	0.00357918	0.12702	0.104123	-0.106325
123.5	-0.227016	0.503186	-0.468167	-0.376991	-0.0434669	-0.179558	-0.0802207	0.146109	-0.292551	-0.179717	-0.000907015	0.0107581	0.117278	0.100773	-0.120111
123.6	-0.222732	0.51644	-0.468294	-0.38023	-0.0537349	-0.189497	-0.0824769	0.143096	-0.287096	-0.15869	0.00691278	0.0156461	0.103646	0.0965292	-0.131775
123.7	-0.217727	0.524001	-0.466175	-0.38353	-0.0655842	-0.198219	-0.0825384	0.13877	-0.283227	-0.137308	0.016823	0.0180204	0.0864551	0.091563	-0.140859
123.8	-0.212083	0.525113	-0.461752	-0.386812	-0.0787752	-0.205644	-0.0804154	0.133302	-0.280997	-0.115962	0.0282592	0.0178122	0.0660378	0.0860208	-0.147022
123.9	-0.205872	0.519172	-0.454998	-0.389988	-0.0930182	-0.211723	-0.0760894	0.126865	-0.280416	-0.0950492	0.0405959	0.0149508	0.0428935	0.0801104	-0.149996
124	-0.199172	0.505735	-0.445896	-0.393068	-0.107972	-0.216447	-0.069629	0.119611	-0.281373	-0.0750613	0.0531135	0.00941339	0.0175569	0.0740253	-0.14961
124.1	-0.192078	0.484494	-0.434454	-0.396034	-0.123226	-0.21985	-0.0611564	0.111731	-0.283711	-0.0565555	0.0651333	0.00132384	-0.00934869	0.0679471	-0.145786
124.2	-0.184675	0.455394	-0.420651	-0.398916	-0.138377	-0.221984	-0.0508362	0.103372	-0.287243	-0.0400314	0.0759857	-0.00920699	-0.0371509	0.0620959	-0.138496
124.3	-0.177062	0.418519	-0.404513	-0.401787	-0.153018	-0.222949	-0.0388598	0.0946867	-0.291683	-0.0259735	0.0850434	-0.0219751	-0.0651237	0.0566967	-0.127867
124.4	-0.169347	0.374206	-0.386095	-0.404707	-0.166753	-0.222829	-0.0255006	0.0858529	-0.296758	-0.0148266	0.091782	-0.036746	-0.0925305	0.0518773	-0.114099
124.5	-0.161626	0.322923	-0.365524	-0.407761	-0.179217	-0.221738	-0.0110046	0.077015	-0.302142	-0.00695227	0.095728	-0.0532735	-0.118609	0.0477777	-0.0975264
124.6	-0.154002	0.265308	-0.342934	-0.411047	-0.190049	-0.219775	0.00428483	0.0683422	-0.307577	-0.00257035	0.0965288	-0.071268	-0.142681	0.0444862	-0.0785102
124.7	-0.146556	0.202169	-0.318558	-0.414667	-0.198942	-0.217057	0.0200543	0.0599727	-0.312791	-0.00176661	0.0939364	-0.090399	-0.164091	0.0421006	-0.0575083
124.8	-0.13938	0.134405	-0.292631	-0.41865	-0.205671	-0.213677	0.0358798	0.0520389	-0.317512	-0.00451818	0.0878268	-0.110345	-0.182251	0.0406725	-0.034994
124.9	-0.132531	0.0630455	-0.265497	-0.423014	-0.210071	-0.209715	0.0513371	0.044699	-0.321597	-0.0106766	0.078187	-0.130755	-0.19665	0.0402152	-0.0115222
125	-0.126048	-0.0108051	-0.237547	-0.42774	-0.212053	-0.205265	0.0659647	0.0380526	-0.324894	-0.0199265	0.0651347	-0.151332	-0.206897	0.0407066	0.0123445
125.1	-0.119969	-0.0860272	-0.209252	-0.432735	-0.211588	-0.200399	0.0792876	0.0322328	-0.327381	-0.0318219	0.0489048	-0.171718	-0.212758	0.0421434	0.0360032
125.2	-0.114295	-0.16149	-0.181122	-0.437889	-0.208737	-0.195177	0.0908152	0.0273137	-0.329081	-0.0458459	0.0297642	-0.191633	-0.214069	0.0444595	0.0589162
125.3	-0.109029	-0.236086	-0.1537	-0.443025	-0.20365	-0.189668	0.100093	0.0233748	-0.330103	-0.0613672	0.00814977	-0.210766	-0.210863	0.0476052	0.0804864
125.4	-0.104132	-0.308746	-0.127604	-0.447929	-0.196475	-0.183933	0.10665	0.0204909	-0.330656	-0.0776708	-0.015549	-0.228835	-0.203225	0.0514891	0.100212
125.5	-0.0995534	-0.378444	-0.10342	-0.45232	-0.187407	-0.178041	0.110086	0.018664	-0.330907	-0.0940732	-0.0408351	-0.245613	-0.191443	0.0560012	0.117615
125.6	-0.0952196	-0.444297	-0.0817472	-0.455929	-0.176695	-0.172023	0.110006	0.0179101	-0.331116	-0.109877	-0.0672274	-0.260897	-0.175812	0.0609932	0.132324
125.7	-0.091065	-0.505476	-0.0631239	-0.458443	-0.164619	-0.165885	0.106091	0.0181847	-0.331556	-0.124442	-0.0942549	-0.274554	-0.156797	0.0663248	0.144001
125.8	-0.0870035	-0.561269	-0.0480825	-0.459574	-0.151494	-0.159688	0.0981149	0.0194114	-0.332452	-0.137179	-0.121418	-0.286442	-0.134896	0.0718947	0.152413
125.9	-0.082968	-0.611068	-0.0370352	-0.459015	-0.137605	-0.153405	0.0859595	0.0215152	-0.334033	-0.147595	-0.148277	-0.296443	-0.110638	0.0774857	0.157375
126	-0.0788839	-0.654367	-0.0303347	-0.456484	-0.123251	-0.147023	0.0695889	0.0243488	-0.336482	-0.15533	-0.174372	-0.304487	-0.0845875	0.0829572	0.158859
126.1	-0.074708	-0.690755	-0.0281622	-0.451727	-0.108751	-0.140494	0.0491308	0.0277806	-0.339964	-0.160126	-0.199328	-0.31049	-0.0573653	0.088079	0.156906
126.2	-0.0703875	-0.719993	-0.0306017	-0.444525	-0.0943514	-0.13374	0.0247869	0.0316405	-0.344524	-0.16188	-0.222789	-0.314461	-0.0295324	0.0926056	0.151608
126.3	-0.0659129	-0.741891	-0.0375978	-0.434711	-0.0803188	-0.126715	-0.00304498	0.0357521	-0.350183	-0.160623	-0.244445	-0.316384	-0.00163464	0.0963216	0.143204
126.4	-0.0612704	-0.756409	-0.048958	-0.422161	-0.0669043	-0.119303	-0.0338237	0.039954	-0.356869	-0.156493	-0.263993	-0.316346	0.025816	0.0990325	0.132004
126.5	-0.0564684	-0.763585	-0.0643656	-0.406891	-0.054291	-0.111416	-0.066939	0.0440393	-0.364422	-0.149715	-0.281173	-0.314426	0.052402	0.100493	0.118343
126.6	-0.0515456	-0.763571	-0.0833838	-0.388948	-0.0426455	-0.102951	-0.101637	0.0478612	-0.37265	-0.140639	-0.295799	-0.310663	0.0776581	0.10048	0.102638
126.7	-0.0465564	-0.756594	-0.105478	-0.368496	-0.0320939	-0.0938075	-0.137135	0.0512552	-0.381285	-0.12966	-0.307652	-0.305151	0.101273	0.0987944	0.0853196
126.8	-0.0415698	-0.742978	-0.130024	-0.345713	-0.0227754	-0.0838967	-0.172538	0.0541194	-0.38999	-0.117229	-0.316578	-0.297942	0.122934	0.0952606	0.0668489
126.9	-0.0366546	-0.723116	-0.156386	-0.320894	-0.014773	-0.0731851	-0.206959	0.0563796	-0.398445	-0.10381	-0.322468	-0.289184	0.142376	0.0897318	0.0476514
127	-0.0318847	-0.697493	-0.183859	-0.29435	-0.00812298	-0.061615	-0.239495	0.0579787	-0.406305	-0.089846	-0.325204	-0.278976	0.159419	0.0821608	0.0281946
127.1	-0.0273448	-0.666628	-0.211748	-0.266491	-0.00283946	-0.0492266	-0.269293	0.0589138	-0.41327	-0.0757404	-0.324779	-0.267445	0.173858	0.0725044	0.00887693
127.2	-0.0230968	-0.631121	-0.239376	-0.237755	0.0011318	-0.036062	-0.29563	0.0592251	-0.419033	-0.0618523	-0.321216	-0.254731	0.185643	0.0608395	-0.00993716
127.3	-0.0192142	-0.59162	-0.266068	-0.208633	0.00386614	-0.0222316	-0.317839	0.0589875	-0.42336	-0.0484886	-0.314609	-0.240935	0.194669	0.0472827	-0.0279311
127.4	-0.0157326	-0.548769	-0.29121	-0.179632	0.00544368	-0.00791891	-0.335387	0.0583137	-0.426047	-0.0358769	-0.305138	-0.22622	0.200932	0.0320073	-0.0448741
127.5	-0.0126789	-0.503257	-0.314211	-0.151314	0.00597679	0.006661	-0.347929	0.0573474	-0.426942	-0.0241802	-0.293021	-0.21071	0.204486	0.0152333	-0.0605448
127.6	-0.0100296	-0.45574	-0.334614	-0.124212	0.0056012	0.0212752	-0.355242	0.0562688	-0.425966	-0.0134736	-0.278546	-0.19455	0.205435	-0.00275821	-0.0748156
127.7	-0.00775228	-0.406879	-0.35203	-0.0988425	0.00448461	0.0356587	-0.357298	0.0552578	-0.423107	-0.00375678	-0.262044	-0.177904	0.203931	-0.0215813	-0.0875529
127.8	-0.00579724	-0.357313	-0.366184	-0.075714	0.00281203	0.0495043	-0.354208	0.0545066	-0.418448	0.00506354	-0.243991	-0.160952	0.200185	-0.0408927	-0.0986937
127.9	-0.00408291	-0.30763	-0.376848	-0.055252	0.000815194	0.0625162	-0.346247	0.054232	-0.412087	0.0130843	-0.224851	-0.143867	0.19444	-0.0602994	-0.108173
128	-0.0025082	-0.258371	-0.38393	-0.0377997	-0.0013115	0.0743934	-0.333837	0.0546085	-0.404152	0.0204551	-0.205171	-0.126857	0.187025	-0.0793831	-0.116032
128.1	-0.00095637	-0.210002	-0.38736	-0.0235728	-0.00340751	0.0848878	-0.317494	0.0558411	-0.394819	0.0273509	-0.185539	-0.110128	0.178269	-0.0977408	-0.122301
128.2	0.000698743	-0.162925	-0.387209	-0.0126704	-0.00534426	0.0937494	-0.297876	0.058085	-0.384303	0.0339568	-0.166502	-0.09388	0.16856	-0.114998	-0.127035
128.3	0.00259466	-0.117492	-0.383541	-0.00513638	-0.00704736	0.100791	-0.275681	0.0614575	-0.372814	0.040452	-0.148648	-0.0782745	0.158311	-0.130817	-0.130257
128.4	0.00487128	-0.0739238	-0.376599	-0.000896346	-0.00844338	0.105848	-0.251646	0.0660881	-0.360563	0.0469756	-0.132499	-0.0634433	0.147944	-0.144904	-0.132013
128.5	0.00765067	-0.0324562	-0.366564	0.000303376	-0.00954297	0.108837	-0.226512	0.0720026	-0.347779	0.0536062	-0.118526	-0.0494761	0.137799	-0.157053	-0.132378
128.6	0.0110446	0.00677796	-0.353768	-0.00119008	-0.0104316	0.109711	-0.201006	0.0792042	-0.33462	0.0603914	-0.107131	-0.0364246	0.12828	-0.167102	-0.131414
128.7	0.0151503	0.043729	-0.338507	-0.00488461	-0.0112392	0.108517	-0.175861	0.0876275	-0.321253	0.0673406	-0.0986403	-0.0242866	0.119647	-0.17499	-0.129232
128.8	0.0200087	0.0783378	-0.321139	-0.0102137	-0.0121727	0.105332	-0.151734	0.0971845	-0.307787	0.0743909	-0.0932848	-0.0129535	0.112187	-0.180685	-0.125919
128.9	0.0256457	0.110643	-0.301995	-0.0165423	-0.0134667	0.100271	-0.129194	0.107753	-0.29428	0.0813989	-0.0911696	-0.00232996	0.106065	-0.184251	-0.121622
129	0.0320425	0.140629	-0.281393	-0.0231589	-0.0153883	0.0935347	-0.108754	0.119132	-0.280837	0.0882223	-0.0922971	0.00780915	0.101455	-0.185789	-0.116518
129.1	0.0391532	0.16834	-0.259649	-0.0293902	-0.018254	0.0853294	-0.0908241	0.131102	-0.267426	0.0946832	-0.0965718	0.0177116	0.0983527	-0.185516	-0.11075
129.2	0.0468744	0.193769	-0.237091	-0.0345363	-0.0223832	0.0759301	-0.0757309	0.143378	-0.254026	0.100522	-0.103803	0.0277077	0.0967607	-0.183631	-0.104524
129.3	0.0550775	0.216934	-0.21398	-0.0380038	-0.0280775	0.0655943	-0.063727	0.155707	-0.240569	0.105503	-0.113699	0.0381615	0.0966004	-0.180382	-0.0980605
129.4	0.0635923	0.237822	-0.190556	-0.0392207	-0.035577	0.0546309	-0.055	0.167775	-0.22696	0.109387	-0.125845	0.0494221	0.0976756	-0.176047	-0.0915927
129.5	0.0722319	0.256447	-0.167027	-0.0377234	-0.045067	0.0433376	-0.049609	0.179235	-0.213058	0.111913	-0.139816	0.0618233	0.0997846	-0.170903	-0.0853385
129.6	0.0807753	0.272793	-0.143555	-0.0332126	-0.0566816	0.032031	-0.0475692	0.189744	-0.198781	0.112896	-0.155125	0.0757065	0.102676	-0.165211	-0.0794924
129.7	0.0890054	0.286867	-0.120302	-0.025505	-0.0704325	0.0210257	-0.0488143	0.19897	-0.184022	0.112199	-0.171244	0.0913711	0.106058	-0.159258	-0.0741957
129.8	0.0966897	0.298674	-0.0973875	-0.0146426	-0.0862395	0.0106327	-0.0532194	0.206613	-0.16864	0.109745	-0.187718	0.109029	0.109707	-0.153285	-0.0696219
129.9	0.103597	0.308219	-0.0749514	-0.000722777	-0.103937	0.00117604	-0.0605675	0.212407	-0.15254	0.105488	-0.204032	0.128795	0.113355	-0.147561	-0.0658606
130	0.109513	0.315526	-0.0530912	0.0159818	-0.123255	-0.0070979	-0.0706222	0.216109	-0.135606	0.0994328	-0.219724	0.150692	0.116745	-0.142303	-0.0629557
130.1	0.114229	0.320557	-0.0318872	0.0351277	-0.143841	-0.0139032	-0.0831088	0.217511	-0.117772	0.0916324	-0.234421	0.174654	0.119721	-0.1377	-0.0608901
130.2	0.117595	0.323393	-0.0114767	0.0562554	-0.165301	-0.0190395	-0.0977053	0.216484	-0.0989915	0.0822052	-0.247767	0.200492	0.122058	-0.133879	-0.0595606
130.3	0.119455	0.324074	0.00802021	0.0788327	-0.187177	-0.0223315	-0.114068	0.212965	-0.0792308	0.0713207	-0.259573	0.227895	0.12363	-0.130974	-0.0587767
130.4	0.119718	0.322671	0.0264547	0.102305	-0.209008	-0.0236667	-0.131807	0.206955	-0.0585089	0.0591598	-0.269709	0.256507	0.124336	-0.129068	-0.0583304
130.5	0.118311	0.319284	0.0437067	0.126112	-0.230331	-0.0229646	-0.150521	0.198468	-0.0368352	0.0458854	-0.278163	0.28586	0.124118	-0.128288	-0.0579604
130.6	0.115216	0.313994	0.0596216	0.149696	-0.250705	-0.020216	-0.169788	0.187647	-0.0142574	0.031665	-0.284961	0.315453	0.123002	-0.128679	-0.0573634
130.7	0.110444	0.306884	0.0740431	0.172585	-0.269762	-0.0154704	-0.189203	0.174652	0.00915204	0.0166854	-0.290273	0.34472	0.120992	-0.130269	-0.0562266
130.8	0.10404	0.298051	0.0868185	0.1943	-0.287245	-0.00887462	-0.20838	0.159734	0.0333492	0.00105922	-0.294334	0.373151	0.118232	-0.133032	-0.0542105
130.9	0.0960857	0.287605	0.0977762	0.214449	-0.302996	-0.00065397	-0.226905	0.143171	0.0582119	-0.0150785	-0.297455	0.400189	0.114821	-0.136919	-0.051031
131	0.086705	0.275634	0.106781	0.232775	-0.316976	0.00891915	-0.244433	0.125267	0.0836164	-0.0316621	-0.300013	0.425339	0.110972	-0.14185	-0.0463828
131.1	0.0760311	0.262208	0.11367	0.249058	-0.329224	0.0194993	-0.260622	0.106379	0.109444	-0.0486501	-0.302325	0.448109	0.106943	-0.147663	-0.0400561
131.2	0.0642558	0.247421	0.118357	0.263165	-0.339821	0.0306804	-0.275203	0.086868	0.135488	-0.0660807	-0.304774	0.468099	0.102997	-0.154262	-0.0318965
131.3	0.0515602	0.231349	0.120748	0.275019	-0.348986	0.0419854	-0.287972	0.0671296	0.16156	-0.0839899	-0.307679	0.484992	0.0994957	-0.16145	-0.0217932
131.4	0.0381511	0.214031	0.120867	0.284609	-0.356997	0.0529392	-0.298753	0.0475211	0.187397	-0.102447	-0.311321	0.498521	0.0968135	-0.16899	-0.00977122
131.5	0.0242435	0.195499	0.118713	0.29192	-0.364183	0.0630064	-0.307471	0.0284088	0.212739	-0.121495	-0.315942	0.508541	0.0953577	-0.176631	0.00403989
131.6	0.0100505	0.175745	0.114361	0.296932	-0.370894	0.0716849	-0.314092	0.0101483	0.237281	-0.141149	-0.321766	0.514957	0.095554	-0.184098	0.0195104
131.7	-0.00419476	0.15484	0.107858	0.299667	-0.377442	0.0784523	-0.318589	-0.00699122	0.26066	-0.161435	-0.328902	0.517742	0.0978055	-0.191115	0.036358
131.8	-0.0182714	0.132839	0.0993879	0.300108	-0.384132	0.0828451	-0.32103	-0.0227437	0.282513	-0.18236	-0.337319	0.516938	0.102532	-0.19742	0.0542661
131.9	-0.0319352	0.109812	0.0890997	0.298308	-0.391221	0.0844606	-0.321496	-0.0369101	0.30244	-0.203867	-0.346984	0.512685	0.110087	-0.202739	0.0728532
132	-0.0449746	0.0858655	0.0772264	0.294256	-0.398844	0.0829806	-0.320122	-0.0493524	0.320026	-0.225871	-0.357696	0.505183	0.120803	-0.206827	0.0917283
132.1	-0.0571725	0.0611653	0.0639723	0.287972	-0.407103	0.0781552	-0.317054	-0.0599468	0.33486	-0.248249	-0.369312	0.494659	0.134875	-0.209441	0.110443
132.2	-0.0683184	0.0359234	0.0495794	0.279419	-0.415997	0.0698717	-0.312404	-0.0686658	0.346539	-0.27079	-0.381595	0.481369	0.152414	-0.210393	0.128567
132.3	-0.0782297	0.0104393	0.0342825	0.268616	-0.425422	0.0580577	-0.306317	-0.0755162	0.354697	-0.293252	-0.394262	0.465604	0.173419	-0.209568	0.145672
132.4	-0.0867277	-0.0149317	0.018358	0.255541	-0.435197	0.0428065	-0.298917	-0.0805678	0.359016	-0.315337	-0.407021	0.44769	0.19772	-0.206888	0.161396
132.5	-0.0936659	-0.0398035	0.002075	0.240254	-0.445068	0.0242882	-0.290345	-0.0839817	0.359211	-0.336748	-0.419564	0.42792	0.224983	-0.202313	0.175358
132.6	-0.0989023	-0.0636988	-0.0143377	0.22283	-0.454761	0.00277156	-0.280704	-0.0859172	0.355096	-0.357215	-0.431613	0.406629	0.254758	-0.195932	0.187283
132.7	-0.10234	-0.0861617	-0.0306379	0.2034	-0.463957	-0.0213124	-0.270047	-0.086592	0.346555	-0.376492	-0.442918	0.384138	0.286513	-0.18786	0.196945
132.8	-0.103903	-0.106654	-0.0466406	0.182188	-0.472301	-0.047565	-0.25841	-0.0862427	0.33362	-0.394332	-0.453279	0.360728	0.319522	-0.178263	0.204174
132.9	-0.103565	-0.124648	-0.0621531	0.159433	-0.479469	-0.0753971	-0.245843	-0.0851049	0.316363	-0.410498	-0.46252	0.336652	0.353015	-0.167408	0.208885
133	-0.101308	-0.139649	-0.0770361	0.135491	-0.485149	-0.104284	-0.232336	-0.08346	0.29502	-0.424845	-0.470552	0.312165	0.386135	-0.155591	0.211044
133.1	-0.0971808	-0.151229	-0.0911524	0.110756	-0.48908	-0.133603	-0.217916	-0.0815513	0.269891	-0.437305	-0.477316	0.287508	0.417996	-0.14317	0.210659
133.2	-0.0912459	-0.158999	-0.104468	0.0856763	-0.491057	-0.162768	-0.202626	-0.079645	0.241409	-0.447884	-0.482823	0.262954	0.447757	-0.130502	0.207798
133.3	-0.0836211	-0.162697	-0.116923	0.0607434	-0.490934	-0.191159	-0.186556	-0.0779709	0.210114	-0.456709	-0.487155	0.238738	0.474646	-0.117971	0.202591
133.4	-0.0744536	-0.162191	-0.128514	0.0364476	-0.488657	-0.218249	-0.169763	-0.0767011	0.176574	-0.463941	-0.490384	0.215077	0.497984	-0.105961	0.195217
133.5	-0.0639228	-0.157499	-0.139229	0.0133115	-0.484236	-0.243533	-0.152371	-0.0760233	0.141433	-0.469832	-0.492631	0.192238	0.517209	-0.0948347	0.185864
133.6	-0.0522288	-0.1488	-0.149149	-0.00808705	-0.477743	-0.266595	-0.134508	-0.0760585	0.105391	-0.474683	-0.494014	0.170406	0.531841	-0.084956	0.174767
133.7	-0.0395851	-0.136452	-0.158323	-0.0272616	-0.469304	-0.287093	-0.116376	-0.076885	0.0691516	-0.478826	-0.494701	0.14985	0.54165	-0.0766528	0.162247
133.8	-0.0262428	-0.12092	-0.166783	-0.0436992	-0.459081	-0.304758	-0.0982018	-0.0785555	0.0334637	-0.482689	-0.494879	0.130794	0.546475	-0.0701863	0.148575
133.9	-0.0124275	-0.102874	-0.174624	-0.0570372	-0.447294	-0.319468	-0.0802662	-0.0810737	-0.00097684	-0.486624	-0.494715	0.113473	0.546368	-0.0657074	0.134102
134	0.00160147	-0.0831028	-0.181919	-0.0668944	-0.434219	-0.331126	-0.0628016	-0.0844151	-0.0334833	-0.490985	-0.494383	0.0981353	0.541524	-0.0633448	0.119118
[truncated: 5,721 more rows]
