# Supplementary material for: A label-free approach to detect ligand binding to cell surface proteins in real time
Source: eLife journal article supplement (doi:10.7554/elife.34944), 2018-04-26
Supplement: supp [file Fig5d.xlsx]

## Sheet: Sheet1
	Cm(F)
Time (s)	17512030-044.abf_sec640-749	17512124-138.abf_sec636-749	17512202-219.abf_sec634-798	17515275-302.abf_sec641-788	17517001-017.abf_sec300-454	17517048-053.abf_sec157-247	17517063-074.abf_sec2-147	17517123-134.abf_sec452-593	17518005-009.abf_sec24-64	17518014-025.abf_sec312-394	17519012-016.abf_sec18-153	17519035-040.abf_sec1-112	17519113-130.abf_sec1-150	17519136-146.abf_sec281-422	17519182-192.abf_sec5-126	17519243-254.abf_sec277-444	17523064-113.abf_sec637-822	17523001-031.abf_sec630-840	17530051-067.abf_sec650-830	17530069-101.abf_sec0-155	17831025-066.abf_sec1498-1721	17831079-132.abf_sec701-896	17831133-166.abf_sec622-678	17831168-200.abf_sec710-900	17831202-234.abf_sec676-844	17831236-269.abf_sec1568-1696	17831271-305.abf_sec1554-1734	17n06002-027.abf_sec1133-1238	17n06071-085.abf_sec506-690
0.02	1.99885e-11	2.3044e-11	2.14704e-11	2.14704e-11	2.71193e-11	2.24712e-11	2.5594e-11	2.3914e-11	2.24061e-11	3.36413e-11	2.04149e-11	1.58625e-11	3.05874e-11	2.44168e-11	2.94378e-11	2.2378e-11	1.92155e-11	2.05476e-11	1.62194e-11	2.7515e-11	2.27641e-11	1.91947e-11	1.9905e-11	2.4028e-11	2.17951e-11	1.79313e-11	1.57704e-11	1.8217e-11	2.18506e-11
0.04	1.99894e-11	2.30486e-11	2.14658e-11	2.14658e-11	2.71158e-11	2.24816e-11	2.55947e-11	2.39132e-11	2.241e-11	3.36444e-11	2.04083e-11	1.5864e-11	3.05861e-11	2.44112e-11	2.94313e-11	2.23766e-11	1.92235e-11	2.05425e-11	1.62194e-11	2.75557e-11	2.27627e-11	1.91852e-11	1.99033e-11	2.4025e-11	2.17903e-11	1.79169e-11	1.57659e-11	1.82286e-11	2.18521e-11
0.06	1.99853e-11	2.30448e-11	2.14684e-11	2.14684e-11	2.71098e-11	2.24731e-11	2.55887e-11	2.39044e-11	2.24123e-11	3.36474e-11	2.04175e-11	1.58607e-11	3.05835e-11	2.4414e-11	2.9433e-11	2.23766e-11	1.92201e-11	2.05386e-11	1.62218e-11	2.75428e-11	2.2758e-11	1.91859e-11	1.99036e-11	2.40261e-11	2.1786e-11	1.7914e-11	1.57664e-11	1.82281e-11	2.18507e-11
0.08	1.99904e-11	2.30454e-11	2.14683e-11	2.14683e-11	2.71153e-11	2.2475e-11	2.55895e-11	2.39119e-11	2.24045e-11	3.365e-11	2.04118e-11	1.58619e-11	3.05821e-11	2.4416e-11	2.94386e-11	2.23759e-11	1.92159e-11	2.0542e-11	1.62183e-11	2.75296e-11	2.27544e-11	1.91884e-11	1.9902e-11	2.40292e-11	2.17894e-11	1.79231e-11	1.57687e-11	1.82287e-11	2.18559e-11
0.1	1.99889e-11	2.30438e-11	2.1466e-11	2.1466e-11	2.71173e-11	2.24807e-11	2.559e-11	2.39169e-11	2.24055e-11	3.36501e-11	2.04131e-11	1.58635e-11	3.05832e-11	2.44148e-11	2.94378e-11	2.23727e-11	1.92158e-11	2.0544e-11	1.62115e-11	2.75456e-11	2.27521e-11	1.91919e-11	1.99001e-11	2.40231e-11	2.17921e-11	1.79366e-11	1.57769e-11	1.82259e-11	2.1854e-11
0.12	1.99891e-11	2.30457e-11	2.14691e-11	2.14691e-11	2.71196e-11	2.247e-11	2.55897e-11	2.39122e-11	2.24007e-11	3.36532e-11	2.0412e-11	1.58622e-11	3.05842e-11	2.4419e-11	2.94359e-11	2.23724e-11	1.92282e-11	2.05464e-11	1.62051e-11	2.75387e-11	2.2758e-11	1.91875e-11	1.99076e-11	2.40248e-11	2.17979e-11	1.79291e-11	1.57693e-11	1.82247e-11	2.18527e-11
0.14	1.99904e-11	2.30508e-11	2.14689e-11	2.14689e-11	2.71194e-11	2.24701e-11	2.55917e-11	2.39114e-11	2.24029e-11	3.36455e-11	2.04085e-11	1.58638e-11	3.05881e-11	2.4419e-11	2.94408e-11	2.23737e-11	1.92178e-11	2.05435e-11	1.62165e-11	2.75544e-11	2.27521e-11	1.9196e-11	1.99084e-11	2.4033e-11	2.17952e-11	1.79306e-11	1.57783e-11	1.82225e-11	2.18587e-11
0.16	1.99857e-11	2.30482e-11	2.1472e-11	2.1472e-11	2.71134e-11	2.2467e-11	2.55924e-11	2.39107e-11	2.24031e-11	3.36513e-11	2.04109e-11	1.58592e-11	3.05821e-11	2.44186e-11	2.94384e-11	2.23707e-11	1.92189e-11	2.05387e-11	1.62121e-11	2.75249e-11	2.27473e-11	1.91874e-11	1.99038e-11	2.40257e-11	2.17948e-11	1.79216e-11	1.57821e-11	1.82238e-11	2.18546e-11
0.18	1.99919e-11	2.30426e-11	2.14674e-11	2.14674e-11	2.71196e-11	2.24679e-11	2.55971e-11	2.39115e-11	2.2406e-11	3.36472e-11	2.04124e-11	1.58646e-11	3.05876e-11	2.44109e-11	2.94343e-11	2.23766e-11	1.92224e-11	2.05406e-11	1.62276e-11	2.755e-11	2.27571e-11	1.91866e-11	1.99067e-11	2.40254e-11	2.17893e-11	1.79279e-11	1.57676e-11	1.82177e-11	2.18506e-11
0.2	1.99941e-11	2.30436e-11	2.14687e-11	2.14687e-11	2.71176e-11	2.24657e-11	2.559e-11	2.39068e-11	2.24085e-11	3.36507e-11	2.04072e-11	1.58599e-11	3.0585e-11	2.44152e-11	2.9439e-11	2.23763e-11	1.9224e-11	2.0539e-11	1.62185e-11	2.75352e-11	2.27639e-11	1.91938e-11	1.99078e-11	2.40246e-11	2.17854e-11	1.79359e-11	1.57691e-11	1.82209e-11	2.18551e-11
0.22	1.99915e-11	2.30437e-11	2.14669e-11	2.14669e-11	2.71189e-11	2.24729e-11	2.55944e-11	2.39103e-11	2.2407e-11	3.36466e-11	2.04113e-11	1.5859e-11	3.05799e-11	2.44163e-11	2.94384e-11	2.23799e-11	1.92212e-11	2.05429e-11	1.6221e-11	2.75249e-11	2.27466e-11	1.91922e-11	1.99084e-11	2.40294e-11	2.17876e-11	1.79276e-11	1.57711e-11	1.82227e-11	2.18503e-11
0.24	1.99854e-11	2.30383e-11	2.14705e-11	2.14705e-11	2.71188e-11	2.24766e-11	2.55939e-11	2.39078e-11	2.24064e-11	3.36522e-11	2.04104e-11	1.58621e-11	3.05815e-11	2.44155e-11	2.94367e-11	2.23741e-11	1.92203e-11	2.05411e-11	1.62324e-11	2.75471e-11	2.27558e-11	1.91849e-11	1.99045e-11	2.40231e-11	2.17883e-11	1.79333e-11	1.57668e-11	1.8228e-11	2.18532e-11
0.26	1.99934e-11	2.30428e-11	2.1468e-11	2.1468e-11	2.71167e-11	2.24768e-11	2.55843e-11	2.39128e-11	2.2407e-11	3.36517e-11	2.04058e-11	1.5864e-11	3.05864e-11	2.44165e-11	2.94375e-11	2.237e-11	1.92182e-11	2.0542e-11	1.62256e-11	2.75443e-11	2.27562e-11	1.91852e-11	1.99038e-11	2.4025e-11	2.1786e-11	1.79319e-11	1.57643e-11	1.82271e-11	2.1854e-11
0.28	1.9984e-11	2.30518e-11	2.14671e-11	2.14671e-11	2.71213e-11	2.24729e-11	2.5592e-11	2.39117e-11	2.24053e-11	3.36518e-11	2.04134e-11	1.58616e-11	3.05859e-11	2.44144e-11	2.94435e-11	2.23708e-11	1.92188e-11	2.05428e-11	1.62098e-11	2.7545e-11	2.27591e-11	1.91894e-11	1.99049e-11	2.40218e-11	2.17897e-11	1.79269e-11	1.57637e-11	1.82238e-11	2.18481e-11
0.3	1.99918e-11	2.30495e-11	2.14648e-11	2.14648e-11	2.71158e-11	2.24728e-11	2.55933e-11	2.39172e-11	2.24101e-11	3.3646e-11	2.04187e-11	1.58598e-11	3.05826e-11	2.44088e-11	2.9437e-11	2.23727e-11	1.9222e-11	2.05411e-11	1.62135e-11	2.75298e-11	2.27599e-11	1.91936e-11	1.99049e-11	2.40237e-11	2.17918e-11	1.79288e-11	1.57711e-11	1.82228e-11	2.18499e-11
0.32	1.99928e-11	2.30461e-11	2.14705e-11	2.14705e-11	2.71184e-11	2.24711e-11	2.55923e-11	2.39063e-11	2.24071e-11	3.36535e-11	2.04164e-11	1.58682e-11	3.05841e-11	2.44149e-11	2.94398e-11	2.23669e-11	1.92183e-11	2.05387e-11	1.62182e-11	2.75727e-11	2.27566e-11	1.91878e-11	1.99023e-11	2.40311e-11	2.17923e-11	1.79297e-11	1.5761e-11	1.82248e-11	2.18428e-11
0.34	1.99847e-11	2.30445e-11	2.14691e-11	2.14691e-11	2.71221e-11	2.24594e-11	2.55919e-11	2.39068e-11	2.24055e-11	3.36526e-11	2.04075e-11	1.58607e-11	3.05829e-11	2.44147e-11	2.94359e-11	2.23742e-11	1.92223e-11	2.05387e-11	1.62192e-11	2.75585e-11	2.27565e-11	1.91904e-11	1.99044e-11	2.40251e-11	2.17972e-11	1.79393e-11	1.57739e-11	1.82252e-11	2.18583e-11
0.36	1.99943e-11	2.30437e-11	2.14648e-11	2.14648e-11	2.71248e-11	2.24658e-11	2.55909e-11	2.3909e-11	2.24059e-11	3.36517e-11	2.04103e-11	1.58632e-11	3.05818e-11	2.44158e-11	2.94361e-11	2.2372e-11	1.92242e-11	2.05393e-11	1.62219e-11	2.75479e-11	2.2761e-11	1.91859e-11	1.99008e-11	2.40306e-11	2.17889e-11	1.79307e-11	1.57739e-11	1.82207e-11	2.18531e-11
0.38	1.99829e-11	2.30451e-11	2.14693e-11	2.14693e-11	2.7116e-11	2.24755e-11	2.55869e-11	2.3911e-11	2.24095e-11	3.36478e-11	2.04154e-11	1.58664e-11	3.0582e-11	2.44175e-11	2.94422e-11	2.23716e-11	1.92237e-11	2.05348e-11	1.62169e-11	2.7523e-11	2.27534e-11	1.91892e-11	1.99036e-11	2.40334e-11	2.17892e-11	1.79231e-11	1.57669e-11	1.82264e-11	2.18485e-11
0.4	1.99838e-11	2.30394e-11	2.14705e-11	2.14705e-11	2.71189e-11	2.24674e-11	2.55858e-11	2.39117e-11	2.24053e-11	3.36493e-11	2.0413e-11	1.58649e-11	3.05838e-11	2.44134e-11	2.94398e-11	2.23791e-11	1.92159e-11	2.05417e-11	1.62248e-11	2.75348e-11	2.27624e-11	1.9189e-11	1.99064e-11	2.40297e-11	2.17996e-11	1.79215e-11	1.57732e-11	1.82258e-11	2.18407e-11
0.42	1.99929e-11	2.3045e-11	2.14738e-11	2.14738e-11	2.71195e-11	2.24757e-11	2.5584e-11	2.3907e-11	2.24097e-11	3.36496e-11	2.04073e-11	1.5865e-11	3.05816e-11	2.44164e-11	2.94434e-11	2.23738e-11	1.92233e-11	2.05388e-11	1.62182e-11	2.75537e-11	2.2758e-11	1.91897e-11	1.99065e-11	2.40308e-11	2.17912e-11	1.79253e-11	1.57654e-11	1.8219e-11	2.18532e-11
0.44	1.99946e-11	2.30509e-11	2.14658e-11	2.14658e-11	2.71187e-11	2.24673e-11	2.55841e-11	2.39139e-11	2.23999e-11	3.36499e-11	2.0413e-11	1.58662e-11	3.05872e-11	2.44163e-11	2.94399e-11	2.23661e-11	1.92159e-11	2.05356e-11	1.62223e-11	2.75697e-11	2.27577e-11	1.9189e-11	1.99049e-11	2.403e-11	2.17873e-11	1.7931e-11	1.57716e-11	1.82244e-11	2.18489e-11
0.46	1.99914e-11	2.30426e-11	2.14661e-11	2.14661e-11	2.71253e-11	2.24691e-11	2.55781e-11	2.39157e-11	2.24055e-11	3.36521e-11	2.04098e-11	1.58659e-11	3.05846e-11	2.44178e-11	2.94392e-11	2.23708e-11	1.92185e-11	2.05315e-11	1.62178e-11	2.75086e-11	2.27622e-11	1.91877e-11	1.99031e-11	2.40267e-11	2.17943e-11	1.79187e-11	1.57711e-11	1.8223e-11	2.18528e-11
0.48	1.99878e-11	2.30443e-11	2.14684e-11	2.14684e-11	2.71198e-11	2.24749e-11	2.55854e-11	2.39065e-11	2.24024e-11	3.36509e-11	2.04119e-11	1.58625e-11	3.05844e-11	2.44173e-11	2.94404e-11	2.23748e-11	1.92201e-11	2.05304e-11	1.62267e-11	2.75409e-11	2.27606e-11	1.91917e-11	1.99061e-11	2.40279e-11	2.17809e-11	1.79162e-11	1.57791e-11	1.82228e-11	2.1859e-11
0.5	1.99903e-11	2.3041e-11	2.14681e-11	2.14681e-11	2.71206e-11	2.24677e-11	2.55872e-11	2.39137e-11	2.24038e-11	3.36574e-11	2.04131e-11	1.58648e-11	3.0584e-11	2.44168e-11	2.94393e-11	2.23749e-11	1.92197e-11	2.05294e-11	1.6223e-11	2.75701e-11	2.27651e-11	1.91953e-11	1.99084e-11	2.40339e-11	2.17928e-11	1.79193e-11	1.57695e-11	1.82231e-11	2.18492e-11
0.52	1.99881e-11	2.30401e-11	2.14677e-11	2.14677e-11	2.71205e-11	2.24658e-11	2.55885e-11	2.391e-11	2.24028e-11	3.36534e-11	2.04074e-11	1.58669e-11	3.058e-11	2.44187e-11	2.94415e-11	2.23726e-11	1.92171e-11	2.05268e-11	1.6231e-11	2.75265e-11	2.2763e-11	1.91943e-11	1.99033e-11	2.4029e-11	2.17915e-11	1.79284e-11	1.57704e-11	1.82282e-11	2.18473e-11
0.54	1.99929e-11	2.30453e-11	2.14682e-11	2.14682e-11	2.7122e-11	2.24654e-11	2.55895e-11	2.39093e-11	2.24089e-11	3.36515e-11	2.04092e-11	1.58608e-11	3.05835e-11	2.44209e-11	2.9437e-11	2.23731e-11	1.92149e-11	2.05245e-11	1.62277e-11	2.75314e-11	2.2759e-11	1.91887e-11	1.99e-11	2.40319e-11	2.1794e-11	1.79237e-11	1.57767e-11	1.82261e-11	2.1848e-11
0.56	1.99852e-11	2.3042e-11	2.14677e-11	2.14677e-11	2.712e-11	2.24753e-11	2.55895e-11	2.39111e-11	2.24038e-11	3.36523e-11	2.0412e-11	1.58673e-11	3.05771e-11	2.44207e-11	2.94364e-11	2.23732e-11	1.9217e-11	2.05354e-11	1.6225e-11	2.75331e-11	2.27561e-11	1.91889e-11	1.99063e-11	2.40305e-11	2.17886e-11	1.79158e-11	1.57732e-11	1.82271e-11	2.1853e-11
0.58	1.99883e-11	2.30457e-11	2.14675e-11	2.14675e-11	2.71178e-11	2.24641e-11	2.55873e-11	2.39124e-11	2.24084e-11	3.36539e-11	2.04078e-11	1.58636e-11	3.05848e-11	2.44138e-11	2.94408e-11	2.23691e-11	1.9217e-11	2.05335e-11	1.62215e-11	2.75325e-11	2.27569e-11	1.91933e-11	1.9907e-11	2.40279e-11	2.17906e-11	1.79145e-11	1.57624e-11	1.82211e-11	2.18536e-11
0.6	1.99869e-11	2.30464e-11	2.14658e-11	2.14658e-11	2.71178e-11	2.24762e-11	2.5588e-11	2.39146e-11	2.24009e-11	3.36529e-11	2.0414e-11	1.5863e-11	3.05837e-11	2.44114e-11	2.94374e-11	2.23704e-11	1.9221e-11	2.05322e-11	1.62224e-11	2.75404e-11	2.27609e-11	1.91954e-11	1.99043e-11	2.40289e-11	2.17995e-11	1.79179e-11	1.57744e-11	1.82315e-11	2.18491e-11
0.62	1.99821e-11	2.30422e-11	2.14667e-11	2.14667e-11	2.71173e-11	2.24711e-11	2.55874e-11	2.39179e-11	2.24088e-11	3.36546e-11	2.0413e-11	1.58626e-11	3.0582e-11	2.44151e-11	2.94453e-11	2.23721e-11	1.92201e-11	2.05348e-11	1.62304e-11	2.75272e-11	2.27597e-11	1.91925e-11	1.99027e-11	2.40259e-11	2.17924e-11	1.79137e-11	1.57633e-11	1.82224e-11	2.18522e-11
0.64	1.99912e-11	2.30436e-11	2.14662e-11	2.14662e-11	2.71184e-11	2.24725e-11	2.55872e-11	2.39149e-11	2.24108e-11	3.36525e-11	2.04061e-11	1.58622e-11	3.0582e-11	2.44185e-11	2.94416e-11	2.23745e-11	1.922e-11	2.05269e-11	1.62278e-11	2.75586e-11	2.27482e-11	1.91923e-11	1.9897e-11	2.40254e-11	2.17825e-11	1.79126e-11	1.57665e-11	1.82262e-11	2.18485e-11
0.66	1.99929e-11	2.30432e-11	2.14701e-11	2.14701e-11	2.71248e-11	2.24752e-11	2.55884e-11	2.39142e-11	2.24049e-11	3.36475e-11	2.04128e-11	1.58626e-11	3.05838e-11	2.44149e-11	2.94421e-11	2.23702e-11	1.92165e-11	2.05317e-11	1.62298e-11	2.75396e-11	2.27596e-11	1.919e-11	1.98997e-11	2.40304e-11	2.17918e-11	1.79049e-11	1.57702e-11	1.82225e-11	2.18481e-11
0.68	1.99934e-11	2.30383e-11	2.14683e-11	2.14683e-11	2.71194e-11	2.24759e-11	2.55883e-11	2.3914e-11	2.24017e-11	3.36515e-11	2.04084e-11	1.58646e-11	3.05843e-11	2.4417e-11	2.94402e-11	2.23766e-11	1.92187e-11	2.05318e-11	1.6223e-11	2.75429e-11	2.27547e-11	1.91948e-11	1.98993e-11	2.40286e-11	2.17878e-11	1.79266e-11	1.57665e-11	1.82235e-11	2.18487e-11
0.7	1.99912e-11	2.30477e-11	2.14694e-11	2.14694e-11	2.71219e-11	2.24703e-11	2.55901e-11	2.39181e-11	2.2398e-11	3.36492e-11	2.04093e-11	1.58619e-11	3.05889e-11	2.44158e-11	2.94416e-11	2.23741e-11	1.92233e-11	2.05277e-11	1.6211e-11	2.74953e-11	2.27586e-11	1.91926e-11	1.9896e-11	2.40309e-11	2.17847e-11	1.79258e-11	1.57682e-11	1.82235e-11	2.18518e-11
0.72	1.99925e-11	2.30462e-11	2.14709e-11	2.14709e-11	2.71222e-11	2.24658e-11	2.55911e-11	2.39148e-11	2.24043e-11	3.36544e-11	2.04092e-11	1.58657e-11	3.05864e-11	2.44178e-11	2.9435e-11	2.23746e-11	1.92203e-11	2.05303e-11	1.62255e-11	2.75382e-11	2.27554e-11	1.91905e-11	1.98989e-11	2.40354e-11	2.17879e-11	1.79237e-11	1.57723e-11	1.82245e-11	2.18498e-11
0.74	1.99899e-11	2.30438e-11	2.1468e-11	2.1468e-11	2.71184e-11	2.24768e-11	2.55857e-11	2.39062e-11	2.24047e-11	3.36535e-11	2.04116e-11	1.58631e-11	3.05846e-11	2.44156e-11	2.94396e-11	2.23762e-11	1.9219e-11	2.05282e-11	1.62216e-11	2.753e-11	2.27435e-11	1.91968e-11	1.98968e-11	2.40258e-11	2.17896e-11	1.79203e-11	1.57703e-11	1.82281e-11	2.1855e-11
0.76	1.99892e-11	2.30504e-11	2.14675e-11	2.14675e-11	2.71191e-11	2.24674e-11	2.5589e-11	2.39127e-11	2.24025e-11	3.36463e-11	2.04073e-11	1.58648e-11	3.0584e-11	2.44177e-11	2.9439e-11	2.23767e-11	1.92251e-11	2.05292e-11	1.62269e-11	2.75718e-11	2.27486e-11	1.91931e-11	1.98933e-11	2.40294e-11	2.17939e-11	1.79263e-11	1.57657e-11	1.82263e-11	2.18503e-11
0.78	1.99912e-11	2.30474e-11	2.14684e-11	2.14684e-11	2.7122e-11	2.24691e-11	2.55853e-11	2.39123e-11	2.24073e-11	3.36463e-11	2.0412e-11	1.58691e-11	3.05807e-11	2.44155e-11	2.94369e-11	2.2374e-11	1.92199e-11	2.0523e-11	1.62254e-11	2.75871e-11	2.27532e-11	1.91932e-11	1.98986e-11	2.40291e-11	2.17979e-11	1.79174e-11	1.57501e-11	1.82252e-11	2.18523e-11
0.8	1.99914e-11	2.30476e-11	2.14638e-11	2.14638e-11	2.71189e-11	2.24756e-11	2.55826e-11	2.39065e-11	2.24105e-11	3.36497e-11	2.04084e-11	1.58619e-11	3.05864e-11	2.44168e-11	2.94397e-11	2.23732e-11	1.9226e-11	2.05277e-11	1.62226e-11	2.75641e-11	2.27535e-11	1.91883e-11	1.99026e-11	2.40332e-11	2.17852e-11	1.79141e-11	1.57631e-11	1.82213e-11	2.18499e-11
0.82	1.99868e-11	2.30394e-11	2.14654e-11	2.14654e-11	2.71179e-11	2.24648e-11	2.5589e-11	2.39105e-11	2.24029e-11	3.36513e-11	2.04097e-11	1.58696e-11	3.05847e-11	2.44164e-11	2.94437e-11	2.23819e-11	1.92199e-11	2.05201e-11	1.62267e-11	2.75361e-11	2.27511e-11	1.91896e-11	1.98936e-11	2.4029e-11	2.17917e-11	1.79251e-11	1.57764e-11	1.82281e-11	2.18511e-11
0.84	1.99905e-11	2.30434e-11	2.14642e-11	2.14642e-11	2.71198e-11	2.247e-11	2.5588e-11	2.39146e-11	2.24049e-11	3.36489e-11	2.04112e-11	1.58669e-11	3.05915e-11	2.44138e-11	2.94407e-11	2.23699e-11	1.92213e-11	2.05262e-11	1.62211e-11	2.75448e-11	2.27552e-11	1.91927e-11	1.98975e-11	2.4029e-11	2.17922e-11	1.79169e-11	1.57556e-11	1.82255e-11	2.18456e-11
0.86	1.99893e-11	2.30444e-11	2.14679e-11	2.14679e-11	2.71235e-11	2.2473e-11	2.55885e-11	2.3913e-11	2.2407e-11	3.36457e-11	2.04077e-11	1.58608e-11	3.05837e-11	2.44152e-11	2.94433e-11	2.23765e-11	1.92285e-11	2.05233e-11	1.62217e-11	2.75751e-11	2.27514e-11	1.91941e-11	1.98977e-11	2.40315e-11	2.17948e-11	1.79179e-11	1.57651e-11	1.82191e-11	2.18449e-11
0.88	1.99846e-11	2.30421e-11	2.14719e-11	2.14719e-11	2.71243e-11	2.24762e-11	2.55862e-11	2.39164e-11	2.24081e-11	3.36478e-11	2.04092e-11	1.58669e-11	3.05878e-11	2.44133e-11	2.94467e-11	2.23701e-11	1.92281e-11	2.05199e-11	1.62193e-11	2.75835e-11	2.27595e-11	1.91917e-11	1.99023e-11	2.40292e-11	2.17979e-11	1.7906e-11	1.5775e-11	1.82269e-11	2.18472e-11
0.9	1.99896e-11	2.30419e-11	2.14655e-11	2.14655e-11	2.71276e-11	2.24673e-11	2.55868e-11	2.3909e-11	2.23995e-11	3.3649e-11	2.04092e-11	1.58627e-11	3.0587e-11	2.44161e-11	2.94372e-11	2.23706e-11	1.92256e-11	2.05233e-11	1.62157e-11	2.75583e-11	2.27532e-11	1.91964e-11	1.99011e-11	2.40292e-11	2.17927e-11	1.79147e-11	1.57735e-11	1.8221e-11	2.18487e-11
0.92	1.99884e-11	2.3036e-11	2.14674e-11	2.14674e-11	2.71199e-11	2.24684e-11	2.55832e-11	2.39168e-11	2.24028e-11	3.36486e-11	2.04099e-11	1.58701e-11	3.05898e-11	2.44147e-11	2.94372e-11	2.23735e-11	1.92231e-11	2.05227e-11	1.62117e-11	2.75347e-11	2.27472e-11	1.91954e-11	1.98989e-11	2.40315e-11	2.17851e-11	1.79091e-11	1.57723e-11	1.82287e-11	2.18504e-11
0.94	1.99923e-11	2.3046e-11	2.14664e-11	2.14664e-11	2.71258e-11	2.24691e-11	2.5586e-11	2.39167e-11	2.24069e-11	3.36507e-11	2.04099e-11	1.5869e-11	3.05865e-11	2.44167e-11	2.94418e-11	2.23703e-11	1.92225e-11	2.05328e-11	1.62151e-11	2.75785e-11	2.27447e-11	1.91899e-11	1.99021e-11	2.40337e-11	2.17804e-11	1.79078e-11	1.57718e-11	1.82242e-11	2.18479e-11
0.96	1.99923e-11	2.30395e-11	2.14696e-11	2.14696e-11	2.71245e-11	2.24705e-11	2.55841e-11	2.39192e-11	2.24101e-11	3.36551e-11	2.04076e-11	1.5867e-11	3.05876e-11	2.44186e-11	2.944e-11	2.23738e-11	1.9219e-11	2.05251e-11	1.62107e-11	2.75717e-11	2.27494e-11	1.9192e-11	1.98972e-11	2.40262e-11	2.17846e-11	1.79104e-11	1.57662e-11	1.82249e-11	2.18479e-11
0.98	1.99873e-11	2.30408e-11	2.14681e-11	2.14681e-11	2.71247e-11	2.24719e-11	2.55841e-11	2.39116e-11	2.24101e-11	3.36465e-11	2.04111e-11	1.58676e-11	3.05871e-11	2.44157e-11	2.94426e-11	2.23694e-11	1.92216e-11	2.05298e-11	1.62226e-11	2.75612e-11	2.27474e-11	1.91877e-11	1.99034e-11	2.40324e-11	2.17919e-11	1.79163e-11	1.57646e-11	1.82232e-11	2.18457e-11
1	1.99937e-11	2.30426e-11	2.14676e-11	2.14676e-11	2.71219e-11	2.24628e-11	2.55819e-11	2.39099e-11	2.24089e-11	3.36438e-11	2.04147e-11	1.58636e-11	3.059e-11	2.4417e-11	2.94401e-11	2.23706e-11	1.92235e-11	2.05267e-11	1.62207e-11	2.75776e-11	2.27614e-11	1.91897e-11	1.98998e-11	2.40293e-11	2.17916e-11	1.79191e-11	1.57624e-11	1.82295e-11	2.18515e-11
1.02	1.99873e-11	2.30356e-11	2.14612e-11	2.14612e-11	2.71234e-11	2.24695e-11	2.55913e-11	2.39171e-11	2.24111e-11	3.36468e-11	2.04105e-11	1.58696e-11	3.05887e-11	2.44187e-11	2.94443e-11	2.23709e-11	1.92261e-11	2.05288e-11	1.62128e-11	2.75556e-11	2.27489e-11	1.91865e-11	1.98993e-11	2.40285e-11	2.17854e-11	1.79253e-11	1.57676e-11	1.82276e-11	2.18489e-11
1.04	1.99893e-11	2.30419e-11	2.14694e-11	2.14694e-11	2.71247e-11	2.24674e-11	2.55885e-11	2.39146e-11	2.24109e-11	3.36546e-11	2.04099e-11	1.58643e-11	3.05932e-11	2.44171e-11	2.94407e-11	2.23718e-11	1.9225e-11	2.05209e-11	1.62254e-11	2.75473e-11	2.27503e-11	1.91897e-11	1.98982e-11	2.4029e-11	2.17883e-11	1.79267e-11	1.57738e-11	1.82204e-11	2.18442e-11
1.06	1.99829e-11	2.30473e-11	2.14666e-11	2.14666e-11	2.71213e-11	2.24657e-11	2.55919e-11	2.391e-11	2.24112e-11	3.36512e-11	2.04059e-11	1.58673e-11	3.05873e-11	2.44169e-11	2.94423e-11	2.23741e-11	1.9219e-11	2.053e-11	1.62168e-11	2.75397e-11	2.2747e-11	1.91963e-11	1.99004e-11	2.40258e-11	2.1787e-11	1.7912e-11	1.57647e-11	1.82248e-11	2.18474e-11
1.08	1.99862e-11	2.30439e-11	2.14673e-11	2.14673e-11	2.71213e-11	2.24588e-11	2.559e-11	2.39153e-11	2.24112e-11	3.36497e-11	2.04079e-11	1.58656e-11	3.0584e-11	2.44108e-11	2.944e-11	2.23741e-11	1.9221e-11	2.05282e-11	1.62206e-11	2.75485e-11	2.2756e-11	1.91881e-11	1.98989e-11	2.40326e-11	2.17885e-11	1.79341e-11	1.57589e-11	1.82226e-11	2.18427e-11
1.1	1.99885e-11	2.30459e-11	2.14669e-11	2.14669e-11	2.71218e-11	2.24692e-11	2.55889e-11	2.392e-11	2.24111e-11	3.36524e-11	2.04056e-11	1.58706e-11	3.0588e-11	2.44189e-11	2.94396e-11	2.23738e-11	1.92192e-11	2.05254e-11	1.62226e-11	2.7553e-11	2.27587e-11	1.91884e-11	1.98967e-11	2.40314e-11	2.17934e-11	1.79059e-11	1.57698e-11	1.82223e-11	2.1855e-11
1.12	1.99917e-11	2.30389e-11	2.14645e-11	2.14645e-11	2.71176e-11	2.24712e-11	2.55846e-11	2.39106e-11	2.24117e-11	3.36482e-11	2.04134e-11	1.58652e-11	3.05842e-11	2.44151e-11	2.9437e-11	2.23723e-11	1.92207e-11	2.05332e-11	1.62289e-11	2.75522e-11	2.27601e-11	1.91913e-11	1.99022e-11	2.40279e-11	2.17887e-11	1.78907e-11	1.57693e-11	1.82263e-11	2.18505e-11
1.14	1.99854e-11	2.30383e-11	2.14717e-11	2.14717e-11	2.71236e-11	2.24684e-11	2.55926e-11	2.39173e-11	2.24063e-11	3.36548e-11	2.04072e-11	1.58609e-11	3.0585e-11	2.44141e-11	2.94435e-11	2.23714e-11	1.92269e-11	2.05209e-11	1.62299e-11	2.75613e-11	2.27514e-11	1.91848e-11	1.99011e-11	2.40273e-11	2.17858e-11	1.7891e-11	1.57683e-11	1.82224e-11	2.18499e-11
1.16	1.99911e-11	2.30404e-11	2.14687e-11	2.14687e-11	2.71172e-11	2.24733e-11	2.55886e-11	2.39144e-11	2.24103e-11	3.36506e-11	2.04094e-11	1.58679e-11	3.05819e-11	2.44202e-11	2.94401e-11	2.2373e-11	1.92245e-11	2.0525e-11	1.62322e-11	2.75701e-11	2.2753e-11	1.91942e-11	1.99049e-11	2.40281e-11	2.17814e-11	1.78922e-11	1.57652e-11	1.82241e-11	2.18388e-11
1.18	1.9996e-11	2.30376e-11	2.14726e-11	2.14726e-11	2.71287e-11	2.24663e-11	2.55911e-11	2.39166e-11	2.24109e-11	3.36519e-11	2.04094e-11	1.58673e-11	3.05843e-11	2.44162e-11	2.94422e-11	2.23638e-11	1.9222e-11	2.05256e-11	1.62151e-11	2.75472e-11	2.27532e-11	1.91937e-11	1.99001e-11	2.40313e-11	2.17905e-11	1.78821e-11	1.5775e-11	1.82239e-11	2.18408e-11
1.2	1.99849e-11	2.3045e-11	2.14696e-11	2.14696e-11	2.71232e-11	2.24698e-11	2.55841e-11	2.39153e-11	2.24069e-11	3.36508e-11	2.04072e-11	1.58682e-11	3.05845e-11	2.44146e-11	2.94428e-11	2.23727e-11	1.92183e-11	2.05199e-11	1.62253e-11	2.75668e-11	2.27552e-11	1.91943e-11	1.98987e-11	2.40301e-11	2.17869e-11	1.7884e-11	1.57727e-11	1.82307e-11	2.18458e-11
1.22	1.99876e-11	2.30442e-11	2.14701e-11	2.14701e-11	2.71264e-11	2.24616e-11	2.5593e-11	2.39125e-11	2.24103e-11	3.36493e-11	2.04095e-11	1.58633e-11	3.05896e-11	2.44133e-11	2.94444e-11	2.2374e-11	1.92228e-11	2.05244e-11	1.62214e-11	2.75765e-11	2.27532e-11	1.9187e-11	1.99018e-11	2.40322e-11	2.17815e-11	1.78908e-11	1.57778e-11	1.8228e-11	2.18454e-11
1.24	1.99958e-11	2.30361e-11	2.14689e-11	2.14689e-11	2.71188e-11	2.24656e-11	2.55878e-11	2.39237e-11	2.24056e-11	3.36519e-11	2.0408e-11	1.58667e-11	3.05895e-11	2.44171e-11	2.94444e-11	2.23738e-11	1.92225e-11	2.05217e-11	1.62241e-11	2.75762e-11	2.27533e-11	1.91962e-11	1.99021e-11	2.40302e-11	2.17885e-11	1.78816e-11	1.57644e-11	1.82319e-11	2.18524e-11
1.26	1.9994e-11	2.30437e-11	2.1466e-11	2.1466e-11	2.71246e-11	2.24606e-11	2.55884e-11	2.39073e-11	2.24091e-11	3.36472e-11	2.04048e-11	1.58715e-11	3.05849e-11	2.44192e-11	2.94452e-11	2.23713e-11	1.92225e-11	2.05198e-11	1.62316e-11	2.75619e-11	2.27605e-11	1.91883e-11	1.99031e-11	2.4028e-11	2.17895e-11	1.78867e-11	1.57629e-11	1.82239e-11	2.18485e-11
1.28	1.99865e-11	2.30365e-11	2.14688e-11	2.14688e-11	2.71211e-11	2.24626e-11	2.55927e-11	2.39136e-11	2.24045e-11	3.36509e-11	2.04086e-11	1.58649e-11	3.05828e-11	2.44139e-11	2.94413e-11	2.23706e-11	1.92223e-11	2.05163e-11	1.62271e-11	2.75567e-11	2.27517e-11	1.91901e-11	1.99032e-11	2.40319e-11	2.17945e-11	1.7888e-11	1.57639e-11	1.82199e-11	2.18445e-11
1.3	1.99829e-11	2.30447e-11	2.14695e-11	2.14695e-11	2.71228e-11	2.24635e-11	2.55934e-11	2.39185e-11	2.24045e-11	3.36537e-11	2.04098e-11	1.58692e-11	3.05811e-11	2.44152e-11	2.94414e-11	2.23745e-11	1.9223e-11	2.05191e-11	1.62306e-11	2.75168e-11	2.27487e-11	1.91942e-11	1.9901e-11	2.40315e-11	2.17888e-11	1.78943e-11	1.57675e-11	1.82225e-11	2.18472e-11
1.32	1.99918e-11	2.30389e-11	2.14631e-11	2.14631e-11	2.71235e-11	2.24637e-11	2.55876e-11	2.39117e-11	2.24091e-11	3.36502e-11	2.04076e-11	1.58695e-11	3.0588e-11	2.44139e-11	2.94378e-11	2.23719e-11	1.92179e-11	2.05142e-11	1.62224e-11	2.75766e-11	2.27551e-11	1.91934e-11	1.99001e-11	2.40287e-11	2.17893e-11	1.7904e-11	1.5764e-11	1.82249e-11	2.18435e-11
1.34	1.9994e-11	2.3044e-11	2.14673e-11	2.14673e-11	2.71205e-11	2.24599e-11	2.55928e-11	2.39166e-11	2.24102e-11	3.3653e-11	2.04052e-11	1.58682e-11	3.05841e-11	2.4415e-11	2.94416e-11	2.2372e-11	1.92234e-11	2.05096e-11	1.62267e-11	2.75772e-11	2.27532e-11	1.91937e-11	1.98985e-11	2.40292e-11	2.17868e-11	1.79001e-11	1.57739e-11	1.82267e-11	2.1851e-11
1.36	1.99832e-11	2.30364e-11	2.14741e-11	2.14741e-11	2.71251e-11	2.24709e-11	2.55933e-11	2.39169e-11	2.24112e-11	3.36491e-11	2.04097e-11	1.58658e-11	3.05893e-11	2.44177e-11	2.94452e-11	2.23686e-11	1.92195e-11	2.05247e-11	1.62306e-11	2.75556e-11	2.2749e-11	1.91896e-11	1.9906e-11	2.40361e-11	2.17876e-11	1.78973e-11	1.57676e-11	1.82276e-11	2.18446e-11
1.38	1.9987e-11	2.30349e-11	2.14734e-11	2.14734e-11	2.71258e-11	2.24652e-11	2.55909e-11	2.39176e-11	2.24108e-11	3.36536e-11	2.04107e-11	1.58628e-11	3.0591e-11	2.44116e-11	2.94433e-11	2.23703e-11	1.9224e-11	2.05238e-11	1.62279e-11	2.75908e-11	2.27456e-11	1.91888e-11	1.99014e-11	2.40354e-11	2.17819e-11	1.7897e-11	1.57672e-11	1.82293e-11	2.18531e-11
1.4	1.99966e-11	2.30456e-11	2.14713e-11	2.14713e-11	2.71281e-11	2.24711e-11	2.55963e-11	2.39173e-11	2.24129e-11	3.36537e-11	2.04077e-11	1.58685e-11	3.05859e-11	2.44181e-11	2.9445e-11	2.23731e-11	1.9224e-11	2.0528e-11	1.62293e-11	2.75413e-11	2.27518e-11	1.91927e-11	1.99026e-11	2.40351e-11	2.1789e-11	1.79025e-11	1.57662e-11	1.82307e-11	2.18458e-11
1.42	1.99894e-11	2.30474e-11	2.14632e-11	2.14632e-11	2.7126e-11	2.24781e-11	2.55995e-11	2.39173e-11	2.24142e-11	3.36547e-11	2.04072e-11	1.58691e-11	3.05864e-11	2.44153e-11	2.94432e-11	2.23729e-11	1.92213e-11	2.05229e-11	1.62195e-11	2.75703e-11	2.2756e-11	1.91918e-11	1.99028e-11	2.40331e-11	2.1794e-11	1.79067e-11	1.57626e-11	1.82211e-11	2.18489e-11
1.44	1.99891e-11	2.30417e-11	2.14707e-11	2.14707e-11	2.71263e-11	2.24735e-11	2.55884e-11	2.39175e-11	2.24203e-11	3.36534e-11	2.04067e-11	1.58666e-11	3.05876e-11	2.44109e-11	2.94505e-11	2.23756e-11	1.9222e-11	2.05199e-11	1.62264e-11	2.75553e-11	2.27581e-11	1.91928e-11	1.99099e-11	2.40325e-11	2.17881e-11	1.78971e-11	1.57512e-11	1.82312e-11	2.18556e-11
1.46	1.99893e-11	2.30382e-11	2.14714e-11	2.14714e-11	2.71176e-11	2.24698e-11	2.55982e-11	2.39174e-11	2.24116e-11	3.36471e-11	2.04069e-11	1.58642e-11	3.05884e-11	2.44164e-11	2.94492e-11	2.23706e-11	1.92215e-11	2.05244e-11	1.62154e-11	2.75683e-11	2.27544e-11	1.91902e-11	1.99017e-11	2.40338e-11	2.17875e-11	1.78987e-11	1.57697e-11	1.82262e-11	2.18557e-11
1.48	1.99863e-11	2.30433e-11	2.14645e-11	2.14645e-11	2.71214e-11	2.24715e-11	2.55954e-11	2.39192e-11	2.24098e-11	3.36542e-11	2.04084e-11	1.58619e-11	3.05934e-11	2.44115e-11	2.94384e-11	2.23719e-11	1.92227e-11	2.05168e-11	1.6233e-11	2.75537e-11	2.27437e-11	1.91874e-11	1.99063e-11	2.40333e-11	2.17946e-11	1.78899e-11	1.57695e-11	1.82238e-11	2.18575e-11
1.5	1.9995e-11	2.30395e-11	2.1472e-11	2.1472e-11	2.71225e-11	2.24618e-11	2.55949e-11	2.39188e-11	2.2414e-11	3.36483e-11	2.04075e-11	1.58682e-11	3.05885e-11	2.44089e-11	2.94427e-11	2.23716e-11	1.92195e-11	2.05114e-11	1.62256e-11	2.75735e-11	2.27466e-11	1.91913e-11	1.99091e-11	2.40316e-11	2.17954e-11	1.78945e-11	1.57634e-11	1.82194e-11	2.18552e-11
1.52	1.99853e-11	2.30437e-11	2.14713e-11	2.14713e-11	2.71232e-11	2.24742e-11	2.55948e-11	2.39106e-11	2.24143e-11	3.36535e-11	2.04135e-11	1.58716e-11	3.05895e-11	2.44216e-11	2.94423e-11	2.23718e-11	1.92243e-11	2.05141e-11	1.6225e-11	2.75372e-11	2.2747e-11	1.91901e-11	1.99081e-11	2.40336e-11	2.17849e-11	1.78993e-11	1.57707e-11	1.82223e-11	2.1853e-11
1.54	1.99904e-11	2.30454e-11	2.14621e-11	2.14621e-11	2.7119e-11	2.24696e-11	2.55934e-11	2.39149e-11	2.24128e-11	3.36496e-11	2.04088e-11	1.58718e-11	3.05898e-11	2.44134e-11	2.94422e-11	2.23717e-11	1.92221e-11	2.05083e-11	1.62225e-11	2.75542e-11	2.27502e-11	1.91946e-11	1.99035e-11	2.40317e-11	2.17892e-11	1.78978e-11	1.57692e-11	1.8226e-11	2.18506e-11
1.56	1.99899e-11	2.30436e-11	2.1469e-11	2.1469e-11	2.71278e-11	2.24724e-11	2.55954e-11	2.39151e-11	2.2416e-11	3.36541e-11	2.04076e-11	1.58736e-11	3.05918e-11	2.44144e-11	2.94467e-11	2.23742e-11	1.92231e-11	2.05119e-11	1.62252e-11	2.75674e-11	2.2752e-11	1.9191e-11	1.99059e-11	2.40319e-11	2.17907e-11	1.78926e-11	1.57689e-11	1.82229e-11	2.18485e-11
1.58	1.9988e-11	2.30406e-11	2.1472e-11	2.1472e-11	2.7126e-11	2.24683e-11	2.55975e-11	2.39176e-11	2.24213e-11	3.36521e-11	2.04091e-11	1.58692e-11	3.05871e-11	2.44161e-11	2.94481e-11	2.23682e-11	1.92186e-11	2.05196e-11	1.62299e-11	2.75534e-11	2.27464e-11	1.91946e-11	1.99019e-11	2.40259e-11	2.17902e-11	1.7901e-11	1.57636e-11	1.82233e-11	2.18486e-11
1.6	1.99928e-11	2.30399e-11	2.14681e-11	2.14681e-11	2.71291e-11	2.24774e-11	2.55931e-11	2.39112e-11	2.24161e-11	3.36541e-11	2.04093e-11	1.58687e-11	3.05856e-11	2.44161e-11	2.94458e-11	2.23623e-11	1.92255e-11	2.0509e-11	1.62303e-11	2.75526e-11	2.27539e-11	1.91946e-11	1.99075e-11	2.40296e-11	2.17877e-11	1.78957e-11	1.5765e-11	1.82253e-11	2.18492e-11
1.62	1.99927e-11	2.3041e-11	2.14661e-11	2.14661e-11	2.71269e-11	2.2477e-11	2.55937e-11	2.39127e-11	2.2413e-11	3.36556e-11	2.04125e-11	1.58677e-11	3.05855e-11	2.44114e-11	2.94446e-11	2.23678e-11	1.92207e-11	2.05158e-11	1.62266e-11	2.75744e-11	2.27427e-11	1.91969e-11	1.99048e-11	2.40322e-11	2.1794e-11	1.79e-11	1.57754e-11	1.8228e-11	2.18456e-11
1.64	1.99973e-11	2.30477e-11	2.14712e-11	2.14712e-11	2.71236e-11	2.24692e-11	2.55937e-11	2.3915e-11	2.24187e-11	3.36444e-11	2.04081e-11	1.58677e-11	3.05862e-11	2.44195e-11	2.94433e-11	2.23759e-11	1.92246e-11	2.05084e-11	1.62318e-11	2.75273e-11	2.27517e-11	1.91898e-11	1.99085e-11	2.40355e-11	2.17858e-11	1.78837e-11	1.5779e-11	1.8225e-11	2.18555e-11
1.66	1.9991e-11	2.30461e-11	2.14747e-11	2.14747e-11	2.71261e-11	2.24743e-11	2.56e-11	2.39183e-11	2.24128e-11	3.36492e-11	2.04085e-11	1.5871e-11	3.05897e-11	2.44183e-11	2.94456e-11	2.237e-11	1.9223e-11	2.04995e-11	1.62318e-11	2.75555e-11	2.27499e-11	1.91883e-11	1.99051e-11	2.40319e-11	2.17849e-11	1.7889e-11	1.57728e-11	1.82234e-11	2.18478e-11
1.68	1.99964e-11	2.30477e-11	2.14655e-11	2.14655e-11	2.71259e-11	2.24657e-11	2.56e-11	2.39141e-11	2.2422e-11	3.36522e-11	2.04133e-11	1.58635e-11	3.05834e-11	2.44151e-11	2.94459e-11	2.2374e-11	1.92241e-11	2.05102e-11	1.62162e-11	2.75749e-11	2.27419e-11	1.91941e-11	1.99046e-11	2.40293e-11	2.17864e-11	1.78873e-11	1.57638e-11	1.82301e-11	2.18498e-11
1.7	1.99901e-11	2.30404e-11	2.14704e-11	2.14704e-11	2.7126e-11	2.24681e-11	2.55991e-11	2.39201e-11	2.24271e-11	3.36563e-11	2.04078e-11	1.58681e-11	3.05863e-11	2.44136e-11	2.94469e-11	2.23734e-11	1.92233e-11	2.05112e-11	1.6215e-11	2.76131e-11	2.27524e-11	1.91906e-11	1.99038e-11	2.40334e-11	2.1791e-11	1.78893e-11	1.57711e-11	1.82235e-11	2.18595e-11
1.72	1.9987e-11	2.30437e-11	2.14685e-11	2.14685e-11	2.71247e-11	2.24738e-11	2.5603e-11	2.39132e-11	2.24254e-11	3.36516e-11	2.04126e-11	1.58608e-11	3.05849e-11	2.4415e-11	2.94495e-11	2.23714e-11	1.92218e-11	2.05035e-11	1.62179e-11	2.75618e-11	2.27396e-11	1.91969e-11	1.99114e-11	2.40393e-11	2.17905e-11	1.7892e-11	1.57779e-11	1.82285e-11	2.18484e-11
1.74	1.99859e-11	2.3039e-11	2.1469e-11	2.1469e-11	2.71252e-11	2.247e-11	2.55979e-11	2.3913e-11	2.24297e-11	3.36464e-11	2.04102e-11	1.58664e-11	3.05917e-11	2.44106e-11	2.94462e-11	2.23699e-11	1.92192e-11	2.05061e-11	1.62175e-11	2.75463e-11	2.27485e-11	1.91949e-11	1.99035e-11	2.40319e-11	2.17941e-11	1.78986e-11	1.5769e-11	1.82266e-11	2.1845e-11
1.76	1.99965e-11	2.30431e-11	2.14685e-11	2.14685e-11	2.71252e-11	2.24699e-11	2.55942e-11	2.39173e-11	2.24274e-11	3.36551e-11	2.04073e-11	1.58683e-11	3.05885e-11	2.44148e-11	2.94495e-11	2.23698e-11	1.92252e-11	2.05037e-11	1.62174e-11	2.75667e-11	2.27474e-11	1.91877e-11	1.99072e-11	2.40275e-11	2.17935e-11	1.79058e-11	1.57657e-11	1.82231e-11	2.1853e-11
1.78	1.99905e-11	2.30429e-11	2.1474e-11	2.1474e-11	2.71269e-11	2.24738e-11	2.55989e-11	2.39149e-11	2.24292e-11	3.36537e-11	2.04171e-11	1.58643e-11	3.05849e-11	2.44154e-11	2.94456e-11	2.23757e-11	1.92186e-11	2.05093e-11	1.6215e-11	2.75346e-11	2.27435e-11	1.91895e-11	1.99099e-11	2.40297e-11	2.17873e-11	1.79001e-11	1.57666e-11	1.82256e-11	2.18425e-11
1.8	1.99899e-11	2.30435e-11	2.14663e-11	2.14663e-11	2.71341e-11	2.2466e-11	2.5599e-11	2.39186e-11	2.24363e-11	3.36493e-11	2.04167e-11	1.58642e-11	3.05842e-11	2.44151e-11	2.94497e-11	2.23708e-11	1.92254e-11	2.05058e-11	1.62181e-11	2.75521e-11	2.27568e-11	1.91914e-11	1.99089e-11	2.40323e-11	2.17889e-11	1.79078e-11	1.57608e-11	1.82265e-11	2.18471e-11
1.82	1.99897e-11	2.30417e-11	2.14655e-11	2.14655e-11	2.71297e-11	2.2465e-11	2.55955e-11	2.39139e-11	2.24208e-11	3.36535e-11	2.04132e-11	1.58662e-11	3.05845e-11	2.44123e-11	2.94437e-11	2.23719e-11	1.9218e-11	2.05115e-11	1.62159e-11	2.7518e-11	2.27556e-11	1.91976e-11	1.99129e-11	2.4032e-11	2.17936e-11	1.78978e-11	1.57688e-11	1.82243e-11	2.18514e-11
1.84	1.99931e-11	2.30457e-11	2.14699e-11	2.14699e-11	2.71264e-11	2.24718e-11	2.55927e-11	2.39113e-11	2.24178e-11	3.36532e-11	2.04116e-11	1.58706e-11	3.0586e-11	2.44166e-11	2.94504e-11	2.23769e-11	1.92152e-11	2.05204e-11	1.62233e-11	2.75346e-11	2.27577e-11	1.91926e-11	1.99091e-11	2.40282e-11	2.17863e-11	1.79085e-11	1.57695e-11	1.82256e-11	2.18494e-11
1.86	1.99904e-11	2.30434e-11	2.1471e-11	2.1471e-11	2.7127e-11	2.24632e-11	2.55928e-11	2.3917e-11	2.24144e-11	3.36502e-11	2.04112e-11	1.58703e-11	3.05889e-11	2.4415e-11	2.94444e-11	2.23727e-11	1.92201e-11	2.05231e-11	1.62213e-11	2.75859e-11	2.27526e-11	1.91976e-11	1.99e-11	2.40388e-11	2.17887e-11	1.79068e-11	1.57642e-11	1.82214e-11	2.18532e-11
1.88	1.9994e-11	2.30401e-11	2.14676e-11	2.14676e-11	2.71311e-11	2.24793e-11	2.55951e-11	2.39167e-11	2.24178e-11	3.36555e-11	2.04091e-11	1.58677e-11	3.05834e-11	2.44148e-11	2.94468e-11	2.2373e-11	1.92237e-11	2.05141e-11	1.62278e-11	2.75285e-11	2.27497e-11	1.9191e-11	1.99029e-11	2.40337e-11	2.17893e-11	1.79105e-11	1.57613e-11	1.8227e-11	2.1847e-11
1.9	1.99846e-11	2.30348e-11	2.14703e-11	2.14703e-11	2.71271e-11	2.24674e-11	2.5598e-11	2.39172e-11	2.24225e-11	3.36567e-11	2.04151e-11	1.58681e-11	3.05855e-11	2.44167e-11	2.94485e-11	2.23673e-11	1.92182e-11	2.05184e-11	1.62197e-11	2.7567e-11	2.27515e-11	1.91958e-11	1.99085e-11	2.40362e-11	2.17946e-11	1.79059e-11	1.57622e-11	1.82262e-11	2.18481e-11
1.92	1.99844e-11	2.30458e-11	2.14687e-11	2.14687e-11	2.71299e-11	2.24713e-11	2.55997e-11	2.39207e-11	2.24285e-11	3.36562e-11	2.04093e-11	1.58714e-11	3.05842e-11	2.44117e-11	2.94524e-11	2.23693e-11	1.92199e-11	2.05127e-11	1.62289e-11	2.7551e-11	2.27521e-11	1.91925e-11	1.99042e-11	2.40324e-11	2.17946e-11	1.79101e-11	1.57659e-11	1.82287e-11	2.18474e-11
1.94	1.99837e-11	2.30441e-11	2.14775e-11	2.14775e-11	2.71288e-11	2.24655e-11	2.55986e-11	2.39127e-11	2.24234e-11	3.36571e-11	2.04078e-11	1.58662e-11	3.05874e-11	2.44186e-11	2.94448e-11	2.23717e-11	1.92199e-11	2.05167e-11	1.62198e-11	2.75312e-11	2.2755e-11	1.9192e-11	1.99094e-11	2.4035e-11	2.17964e-11	1.79119e-11	1.57673e-11	1.82206e-11	2.18482e-11
1.96	1.99933e-11	2.30483e-11	2.1465e-11	2.1465e-11	2.71277e-11	2.24645e-11	2.56055e-11	2.39091e-11	2.2422e-11	3.36516e-11	2.04166e-11	1.58654e-11	3.05853e-11	2.44216e-11	2.94426e-11	2.23692e-11	1.92231e-11	2.05163e-11	1.62142e-11	2.75455e-11	2.27484e-11	1.91948e-11	1.99068e-11	2.40333e-11	2.17966e-11	1.79175e-11	1.57686e-11	1.8232e-11	2.18455e-11
1.98	1.9987e-11	2.30439e-11	2.14698e-11	2.14698e-11	2.71201e-11	2.24751e-11	2.55959e-11	2.3916e-11	2.24249e-11	3.36561e-11	2.04146e-11	1.58676e-11	3.05839e-11	2.44092e-11	2.9444e-11	2.23728e-11	1.92175e-11	2.05122e-11	1.62137e-11	2.75685e-11	2.27591e-11	1.91883e-11	1.99075e-11	2.40343e-11	2.17919e-11	1.7907e-11	1.57669e-11	1.82306e-11	2.18468e-11
2	1.9988e-11	2.30475e-11	2.14708e-11	2.14708e-11	2.7129e-11	2.24764e-11	2.55973e-11	2.39087e-11	2.2421e-11	3.36576e-11	2.04161e-11	1.58674e-11	3.05912e-11	2.44176e-11	2.9441e-11	2.23688e-11	1.92264e-11	2.05112e-11	1.62203e-11	2.7564e-11	2.27393e-11	1.9198e-11	1.99077e-11	2.40303e-11	2.17996e-11	1.79096e-11	1.57643e-11	1.82257e-11	2.18564e-11
2.02	1.99908e-11	2.30456e-11	2.14701e-11	2.14701e-11	2.71268e-11	2.24758e-11	2.55985e-11	2.3914e-11	2.24248e-11	3.36546e-11	2.04107e-11	1.58649e-11	3.05931e-11	2.44119e-11	2.94467e-11	2.23727e-11	1.92232e-11	2.05176e-11	1.62122e-11	2.75647e-11	2.2745e-11	1.91968e-11	1.99078e-11	2.40321e-11	2.18001e-11	1.79118e-11	1.57689e-11	1.82243e-11	2.18487e-11
2.04	1.99915e-11	2.3042e-11	2.14737e-11	2.14737e-11	2.71329e-11	2.24573e-11	2.55956e-11	2.3914e-11	2.24202e-11	3.36527e-11	2.04136e-11	1.58665e-11	3.05904e-11	2.44137e-11	2.94484e-11	2.23738e-11	1.92213e-11	2.05174e-11	1.62085e-11	2.75695e-11	2.27576e-11	1.91881e-11	1.99071e-11	2.40314e-11	2.18001e-11	1.79015e-11	1.57718e-11	1.82261e-11	2.18496e-11
2.06	1.99827e-11	2.30396e-11	2.14713e-11	2.14713e-11	2.71255e-11	2.24703e-11	2.55987e-11	2.39208e-11	2.2422e-11	3.36549e-11	2.0412e-11	1.58724e-11	3.05894e-11	2.44156e-11	2.94478e-11	2.23746e-11	1.92193e-11	2.05178e-11	1.6206e-11	2.75641e-11	2.27501e-11	1.91974e-11	1.99047e-11	2.40304e-11	2.17966e-11	1.78994e-11	1.5764e-11	1.82277e-11	2.18566e-11
2.08	1.99925e-11	2.30428e-11	2.14701e-11	2.14701e-11	2.7126e-11	2.24706e-11	2.56004e-11	2.39151e-11	2.2425e-11	3.36551e-11	2.04153e-11	1.58694e-11	3.05899e-11	2.44149e-11	2.94497e-11	2.23743e-11	1.92216e-11	2.05223e-11	1.62128e-11	2.75846e-11	2.27504e-11	1.9192e-11	1.99e-11	2.40299e-11	2.18021e-11	1.79075e-11	1.57582e-11	1.82259e-11	2.18558e-11
2.1	1.99868e-11	2.30449e-11	2.14737e-11	2.14737e-11	2.71256e-11	2.24713e-11	2.55988e-11	2.39166e-11	2.24259e-11	3.3657e-11	2.04121e-11	1.58691e-11	3.05848e-11	2.44195e-11	2.9444e-11	2.2371e-11	1.92227e-11	2.05077e-11	1.62208e-11	2.75666e-11	2.27522e-11	1.91933e-11	1.99076e-11	2.40412e-11	2.17972e-11	1.79145e-11	1.57604e-11	1.82266e-11	2.18474e-11
2.12	1.99939e-11	2.30395e-11	2.14712e-11	2.14712e-11	2.7131e-11	2.24722e-11	2.55918e-11	2.3915e-11	2.24288e-11	3.36524e-11	2.04125e-11	1.5867e-11	3.05884e-11	2.44158e-11	2.9445e-11	2.23764e-11	1.92222e-11	2.05139e-11	1.62187e-11	2.75649e-11	2.27586e-11	1.91945e-11	1.99141e-11	2.40277e-11	2.17975e-11	1.7898e-11	1.57733e-11	1.82264e-11	2.18463e-11
2.14	1.99914e-11	2.30396e-11	2.14703e-11	2.14703e-11	2.71303e-11	2.24612e-11	2.55973e-11	2.39173e-11	2.24254e-11	3.36507e-11	2.04145e-11	1.5868e-11	3.05882e-11	2.44093e-11	2.94472e-11	2.23707e-11	1.92229e-11	2.05063e-11	1.62238e-11	2.75467e-11	2.27458e-11	1.91957e-11	1.99098e-11	2.40319e-11	2.18006e-11	1.78952e-11	1.57664e-11	1.82316e-11	2.18458e-11
2.16	1.99915e-11	2.30468e-11	2.14695e-11	2.14695e-11	2.71288e-11	2.24713e-11	2.55988e-11	2.39124e-11	2.24212e-11	3.36552e-11	2.04138e-11	1.5871e-11	3.05844e-11	2.44151e-11	2.94482e-11	2.237e-11	1.92213e-11	2.0509e-11	1.62126e-11	2.756e-11	2.27524e-11	1.91904e-11	1.99079e-11	2.40313e-11	2.17958e-11	1.79051e-11	1.57589e-11	1.82258e-11	2.185e-11
2.18	1.9982e-11	2.30482e-11	2.1469e-11	2.1469e-11	2.71242e-11	2.2469e-11	2.55973e-11	2.39091e-11	2.24213e-11	3.3658e-11	2.04117e-11	1.58658e-11	3.05899e-11	2.44152e-11	2.94486e-11	2.23718e-11	1.92173e-11	2.05063e-11	1.62006e-11	2.75679e-11	2.27557e-11	1.91935e-11	1.99074e-11	2.40275e-11	2.17915e-11	1.78963e-11	1.57743e-11	1.82293e-11	2.18519e-11
2.2	1.99945e-11	2.30468e-11	2.14708e-11	2.14708e-11	2.71267e-11	2.24684e-11	2.55961e-11	2.39142e-11	2.24235e-11	3.36573e-11	2.0414e-11	1.58641e-11	3.05861e-11	2.4412e-11	2.94479e-11	2.23718e-11	1.92211e-11	2.05088e-11	1.62122e-11	2.75861e-11	2.27512e-11	1.91901e-11	1.99096e-11	2.40311e-11	2.1799e-11	1.79052e-11	1.57753e-11	1.82224e-11	2.18447e-11
2.22	1.9988e-11	2.3044e-11	2.14712e-11	2.14712e-11	2.71253e-11	2.24695e-11	2.5596e-11	2.39125e-11	2.24209e-11	3.36571e-11	2.04106e-11	1.5869e-11	3.05898e-11	2.44164e-11	2.94511e-11	2.2365e-11	1.92177e-11	2.05032e-11	1.62197e-11	2.75587e-11	2.27583e-11	1.91946e-11	1.99089e-11	2.40342e-11	2.18013e-11	1.79073e-11	1.57736e-11	1.82194e-11	2.18473e-11
2.24	1.99897e-11	2.30464e-11	2.1463e-11	2.1463e-11	2.71258e-11	2.24685e-11	2.55972e-11	2.39125e-11	2.24267e-11	3.36496e-11	2.04112e-11	1.58643e-11	3.05824e-11	2.44167e-11	2.94504e-11	2.23767e-11	1.92251e-11	2.05136e-11	1.62119e-11	2.75739e-11	2.2757e-11	1.91914e-11	1.99091e-11	2.40324e-11	2.17995e-11	1.79046e-11	1.57726e-11	1.82266e-11	2.18492e-11
2.26	1.99886e-11	2.30401e-11	2.14757e-11	2.14757e-11	2.71288e-11	2.24686e-11	2.55973e-11	2.39184e-11	2.24238e-11	3.36578e-11	2.04095e-11	1.58668e-11	3.05835e-11	2.44148e-11	2.9449e-11	2.23715e-11	1.92229e-11	2.05124e-11	1.62343e-11	2.75387e-11	2.27497e-11	1.91958e-11	1.99126e-11	2.40309e-11	2.17964e-11	1.79059e-11	1.57734e-11	1.82225e-11	2.18437e-11
2.28	1.99875e-11	2.30414e-11	2.14674e-11	2.14674e-11	2.713e-11	2.24718e-11	2.56002e-11	2.39189e-11	2.24256e-11	3.36571e-11	2.0415e-11	1.58691e-11	3.0582e-11	2.44108e-11	2.94489e-11	2.2376e-11	1.92243e-11	2.05131e-11	1.62184e-11	2.76007e-11	2.27554e-11	1.92007e-11	1.99047e-11	2.40329e-11	2.17946e-11	1.79093e-11	1.57694e-11	1.82283e-11	2.18506e-11
2.3	1.99846e-11	2.305e-11	2.1474e-11	2.1474e-11	2.71306e-11	2.24759e-11	2.55974e-11	2.39125e-11	2.24243e-11	3.36535e-11	2.04102e-11	1.58675e-11	3.05857e-11	2.44166e-11	2.945e-11	2.2373e-11	1.92171e-11	2.05088e-11	1.62229e-11	2.75943e-11	2.27581e-11	1.91974e-11	1.99124e-11	2.40308e-11	2.18015e-11	1.79077e-11	1.57712e-11	1.82245e-11	2.18458e-11
2.32	1.99924e-11	2.30416e-11	2.14738e-11	2.14738e-11	2.71297e-11	2.24714e-11	2.5602e-11	2.39164e-11	2.24255e-11	3.36533e-11	2.04148e-11	1.58695e-11	3.05863e-11	2.44153e-11	2.94442e-11	2.23685e-11	1.9222e-11	2.05072e-11	1.6215e-11	2.75837e-11	2.27541e-11	1.91936e-11	1.99148e-11	2.40372e-11	2.17957e-11	1.79134e-11	1.57797e-11	1.82254e-11	2.18492e-11
2.34	1.99833e-11	2.30356e-11	2.147e-11	2.147e-11	2.71254e-11	2.24712e-11	2.55989e-11	2.39143e-11	2.24211e-11	3.36519e-11	2.04133e-11	1.58653e-11	3.05852e-11	2.44108e-11	2.94504e-11	2.23761e-11	1.92215e-11	2.05046e-11	1.62099e-11	2.75804e-11	2.27557e-11	1.9197e-11	1.99066e-11	2.40288e-11	2.17954e-11	1.79071e-11	1.57666e-11	1.82299e-11	2.18473e-11
2.36	1.99905e-11	2.30398e-11	2.14665e-11	2.14665e-11	2.71289e-11	2.24652e-11	2.56014e-11	2.39214e-11	2.24217e-11	3.36502e-11	2.04111e-11	1.587e-11	3.05901e-11	2.44154e-11	2.9458e-11	2.23711e-11	1.92209e-11	2.05072e-11	1.62208e-11	2.75398e-11	2.27572e-11	1.91989e-11	1.99063e-11	2.403e-11	2.18e-11	1.79094e-11	1.57724e-11	1.82196e-11	2.18537e-11
2.38	1.99917e-11	2.30398e-11	2.14716e-11	2.14716e-11	2.71277e-11	2.24751e-11	2.56025e-11	2.39165e-11	2.2429e-11	3.36587e-11	2.04129e-11	1.58734e-11	3.05895e-11	2.44155e-11	2.9453e-11	2.23797e-11	1.92237e-11	2.05221e-11	1.62073e-11	2.75732e-11	2.27538e-11	1.91956e-11	1.99075e-11	2.4033e-11	2.17955e-11	1.79165e-11	1.57615e-11	1.82282e-11	2.18423e-11
2.4	1.99868e-11	2.30386e-11	2.14709e-11	2.14709e-11	2.71297e-11	2.24726e-11	2.55987e-11	2.39216e-11	2.2428e-11	3.36508e-11	2.04108e-11	1.58739e-11	3.05881e-11	2.44141e-11	2.94508e-11	2.23699e-11	1.92219e-11	2.0513e-11	1.62104e-11	2.75723e-11	2.27505e-11	1.91886e-11	1.99088e-11	2.4034e-11	2.17986e-11	1.79087e-11	1.57599e-11	1.82183e-11	2.18532e-11
2.42	1.99946e-11	2.30436e-11	2.14798e-11	2.14798e-11	2.71304e-11	2.24741e-11	2.55941e-11	2.39172e-11	2.2427e-11	3.36524e-11	2.04131e-11	1.58682e-11	3.05885e-11	2.44156e-11	2.94523e-11	2.23701e-11	1.92224e-11	2.05183e-11	1.62062e-11	2.75636e-11	2.27568e-11	1.91902e-11	1.99056e-11	2.40371e-11	2.17951e-11	1.78973e-11	1.57768e-11	1.82324e-11	2.18454e-11
2.44	1.99888e-11	2.3037e-11	2.14678e-11	2.14678e-11	2.71264e-11	2.24684e-11	2.56053e-11	2.3918e-11	2.24248e-11	3.36486e-11	2.04151e-11	1.58677e-11	3.05908e-11	2.44129e-11	2.94566e-11	2.23709e-11	1.92276e-11	2.05184e-11	1.62063e-11	2.75468e-11	2.27488e-11	1.9194e-11	1.99147e-11	2.40332e-11	2.1793e-11	1.78935e-11	1.57708e-11	1.82311e-11	2.18442e-11
2.46	1.9989e-11	2.30447e-11	2.14653e-11	2.14653e-11	2.71281e-11	2.24745e-11	2.5602e-11	2.39154e-11	2.24251e-11	3.36561e-11	2.04159e-11	1.58689e-11	3.059e-11	2.44185e-11	2.94483e-11	2.23746e-11	1.9227e-11	2.05194e-11	1.62024e-11	2.75913e-11	2.27546e-11	1.91898e-11	1.99089e-11	2.40261e-11	2.17926e-11	1.78894e-11	1.57664e-11	1.82249e-11	2.184e-11
2.48	1.999e-11	2.30359e-11	2.14726e-11	2.14726e-11	2.7128e-11	2.24749e-11	2.56017e-11	2.39203e-11	2.24201e-11	3.36509e-11	2.04083e-11	1.58685e-11	3.05912e-11	2.44132e-11	2.94536e-11	2.2373e-11	1.92268e-11	2.05232e-11	1.62117e-11	2.75555e-11	2.27505e-11	1.91918e-11	1.99119e-11	2.4039e-11	2.17905e-11	1.78874e-11	1.57616e-11	1.82164e-11	2.18554e-11
2.5	1.9995e-11	2.3038e-11	2.14711e-11	2.14711e-11	2.71307e-11	2.2475e-11	2.56005e-11	2.3919e-11	2.2431e-11	3.36486e-11	2.04122e-11	1.58642e-11	3.05895e-11	2.44125e-11	2.94485e-11	2.23717e-11	1.92255e-11	2.05117e-11	1.62117e-11	2.75951e-11	2.27526e-11	1.91951e-11	1.9911e-11	2.40283e-11	2.1792e-11	1.79015e-11	1.57721e-11	1.82215e-11	2.18516e-11
2.52	1.99876e-11	2.30421e-11	2.14689e-11	2.14689e-11	2.71261e-11	2.24753e-11	2.55989e-11	2.39159e-11	2.24245e-11	3.36442e-11	2.0408e-11	1.58716e-11	3.05907e-11	2.44182e-11	2.94552e-11	2.2372e-11	1.92204e-11	2.05129e-11	1.62264e-11	2.75513e-11	2.2746e-11	1.91946e-11	1.99116e-11	2.40307e-11	2.17904e-11	1.78975e-11	1.57653e-11	1.82243e-11	2.18509e-11
2.54	1.99926e-11	2.30414e-11	2.14686e-11	2.14686e-11	2.71256e-11	2.2474e-11	2.5597e-11	2.3921e-11	2.24207e-11	3.36483e-11	2.04091e-11	1.58711e-11	3.05877e-11	2.44088e-11	2.94534e-11	2.23729e-11	1.92239e-11	2.05201e-11	1.62233e-11	2.75658e-11	2.2757e-11	1.91944e-11	1.99103e-11	2.40303e-11	2.17958e-11	1.78931e-11	1.5769e-11	1.82289e-11	2.18506e-11
2.56	1.99925e-11	2.3049e-11	2.14694e-11	2.14694e-11	2.71213e-11	2.24658e-11	2.55968e-11	2.39169e-11	2.24256e-11	3.36545e-11	2.04123e-11	1.58679e-11	3.05865e-11	2.44141e-11	2.94513e-11	2.23765e-11	1.92267e-11	2.05247e-11	1.62252e-11	2.75651e-11	2.27568e-11	1.91964e-11	1.99107e-11	2.40259e-11	2.17907e-11	1.79025e-11	1.57811e-11	1.82246e-11	2.18531e-11
2.58	1.99912e-11	2.30457e-11	2.14742e-11	2.14742e-11	2.71257e-11	2.24838e-11	2.56061e-11	2.39172e-11	2.24211e-11	3.36596e-11	2.04117e-11	1.58658e-11	3.05942e-11	2.44137e-11	2.94521e-11	2.23743e-11	1.92256e-11	2.05261e-11	1.62189e-11	2.75808e-11	2.27516e-11	1.91978e-11	1.99136e-11	2.40379e-11	2.17935e-11	1.78858e-11	1.57653e-11	1.82232e-11	2.18502e-11
2.6	1.99881e-11	2.3043e-11	2.14734e-11	2.14734e-11	2.71248e-11	2.24749e-11	2.5595e-11	2.39229e-11	2.24252e-11	3.36518e-11	2.04157e-11	1.58692e-11	3.05953e-11	2.44135e-11	2.94487e-11	2.23753e-11	1.92255e-11	2.0524e-11	1.62219e-11	2.75744e-11	2.27487e-11	1.91972e-11	1.99068e-11	2.40307e-11	2.17942e-11	1.78865e-11	1.57707e-11	1.82269e-11	2.18595e-11
2.62	1.99961e-11	2.30443e-11	2.14698e-11	2.14698e-11	2.71211e-11	2.248e-11	2.56015e-11	2.3917e-11	2.24266e-11	3.36546e-11	2.04155e-11	1.587e-11	3.0591e-11	2.44082e-11	2.94482e-11	2.2377e-11	1.9226e-11	2.05164e-11	1.62304e-11	2.7559e-11	2.27495e-11	1.9189e-11	1.99087e-11	2.40338e-11	2.17941e-11	1.7888e-11	1.57655e-11	1.82196e-11	2.18534e-11
2.64	1.99908e-11	2.30495e-11	2.14712e-11	2.14712e-11	2.71275e-11	2.24682e-11	2.56002e-11	2.39188e-11	2.24255e-11	3.36501e-11	2.04172e-11	1.58677e-11	3.05931e-11	2.44148e-11	2.94511e-11	2.23719e-11	1.92209e-11	2.05202e-11	1.62169e-11	2.75727e-11	2.27505e-11	1.919e-11	1.99062e-11	2.40351e-11	2.17851e-11	1.78925e-11	1.57541e-11	1.82265e-11	2.18551e-11
2.66	1.99931e-11	2.30478e-11	2.14757e-11	2.14757e-11	2.71227e-11	2.24737e-11	2.55978e-11	2.39171e-11	2.24268e-11	3.36508e-11	2.04148e-11	1.58746e-11	3.05987e-11	2.4413e-11	2.94526e-11	2.23722e-11	1.92267e-11	2.05162e-11	1.62183e-11	2.75588e-11	2.27502e-11	1.91895e-11	1.99109e-11	2.40342e-11	2.17834e-11	1.78944e-11	1.5761e-11	1.8228e-11	2.18576e-11
2.68	1.99913e-11	2.30513e-11	2.14702e-11	2.14702e-11	2.71276e-11	2.24763e-11	2.5601e-11	2.39199e-11	2.24248e-11	3.36551e-11	2.04109e-11	1.58706e-11	3.05891e-11	2.44106e-11	2.94534e-11	2.23738e-11	1.92229e-11	2.05162e-11	1.62257e-11	2.75325e-11	2.27568e-11	1.91958e-11	1.99029e-11	2.40355e-11	2.17922e-11	1.79054e-11	1.57736e-11	1.82268e-11	2.18564e-11
2.7	1.99917e-11	2.30415e-11	2.14728e-11	2.14728e-11	2.71261e-11	2.24727e-11	2.55981e-11	2.39178e-11	2.2424e-11	3.36566e-11	2.04179e-11	1.58705e-11	3.05961e-11	2.44136e-11	2.94495e-11	2.23743e-11	1.92247e-11	2.05273e-11	1.62368e-11	2.75526e-11	2.27544e-11	1.91929e-11	1.99072e-11	2.40327e-11	2.17912e-11	1.79173e-11	1.57779e-11	1.82305e-11	2.18532e-11
2.72	1.99903e-11	2.30405e-11	2.14618e-11	2.14618e-11	2.71249e-11	2.24762e-11	2.56028e-11	2.39227e-11	2.24199e-11	3.3648e-11	2.04126e-11	1.58745e-11	3.05934e-11	2.44122e-11	2.94499e-11	2.2373e-11	1.92237e-11	2.05238e-11	1.62305e-11	2.75574e-11	2.27525e-11	1.91998e-11	1.99069e-11	2.40315e-11	2.17937e-11	1.79126e-11	1.57573e-11	1.82249e-11	2.1856e-11
2.74	1.9995e-11	2.30439e-11	2.14689e-11	2.14689e-11	2.7132e-11	2.2481e-11	2.55979e-11	2.3918e-11	2.24262e-11	3.36523e-11	2.0408e-11	1.58687e-11	3.05925e-11	2.44099e-11	2.94521e-11	2.2378e-11	1.92228e-11	2.05184e-11	1.62356e-11	2.75918e-11	2.27602e-11	1.91972e-11	1.99107e-11	2.40389e-11	2.17874e-11	1.78923e-11	1.57633e-11	1.82287e-11	2.18574e-11
2.76	1.99856e-11	2.3044e-11	2.14729e-11	2.14729e-11	2.71277e-11	2.24731e-11	2.55981e-11	2.39146e-11	2.24286e-11	3.36523e-11	2.04125e-11	1.58754e-11	3.05943e-11	2.44146e-11	2.9452e-11	2.23789e-11	1.92197e-11	2.0518e-11	1.62321e-11	2.75678e-11	2.27612e-11	1.91913e-11	1.99114e-11	2.40358e-11	2.17856e-11	1.78986e-11	1.57664e-11	1.82235e-11	2.18516e-11
2.78	1.9996e-11	2.30431e-11	2.14769e-11	2.14769e-11	2.71233e-11	2.24763e-11	2.56008e-11	2.39221e-11	2.24245e-11	3.3652e-11	2.04128e-11	1.58745e-11	3.05939e-11	2.44089e-11	2.94485e-11	2.23739e-11	1.92219e-11	2.05261e-11	1.62293e-11	2.75874e-11	2.27563e-11	1.91976e-11	1.99083e-11	2.40343e-11	2.17944e-11	1.7884e-11	1.57644e-11	1.82296e-11	2.18554e-11
2.8	1.99914e-11	2.30448e-11	2.14675e-11	2.14675e-11	2.71235e-11	2.24792e-11	2.56032e-11	2.39213e-11	2.24308e-11	3.36518e-11	2.04152e-11	1.5873e-11	3.05931e-11	2.44142e-11	2.94519e-11	2.23718e-11	1.92209e-11	2.05232e-11	1.62409e-11	2.7557e-11	2.27556e-11	1.91922e-11	1.99035e-11	2.40366e-11	2.17895e-11	1.78992e-11	1.5768e-11	1.82364e-11	2.1852e-11
2.82	1.99861e-11	2.30412e-11	2.14712e-11	2.14712e-11	2.71218e-11	2.24817e-11	2.56002e-11	2.39172e-11	2.24202e-11	3.36516e-11	2.04111e-11	1.58677e-11	3.05899e-11	2.44127e-11	2.94507e-11	2.23681e-11	1.92202e-11	2.05224e-11	1.62325e-11	2.75863e-11	2.27601e-11	1.91912e-11	1.99091e-11	2.40328e-11	2.17917e-11	1.7885e-11	1.57592e-11	1.82284e-11	2.18492e-11
2.84	1.99948e-11	2.304e-11	2.14682e-11	2.14682e-11	2.71211e-11	2.24738e-11	2.56084e-11	2.39203e-11	2.24213e-11	3.36509e-11	2.04157e-11	1.58726e-11	3.05958e-11	2.44147e-11	2.94517e-11	2.2375e-11	1.92202e-11	2.05242e-11	1.62318e-11	2.75413e-11	2.27563e-11	1.91969e-11	1.99108e-11	2.40307e-11	2.17939e-11	1.79058e-11	1.57692e-11	1.82214e-11	2.18636e-11
2.86	1.99929e-11	2.30514e-11	2.14693e-11	2.14693e-11	2.71229e-11	2.24741e-11	2.55987e-11	2.39138e-11	2.24221e-11	3.3647e-11	2.04116e-11	1.58745e-11	3.05935e-11	2.44153e-11	2.94545e-11	2.23725e-11	1.92252e-11	2.05264e-11	1.62282e-11	2.75522e-11	2.27559e-11	1.91978e-11	1.99122e-11	2.40308e-11	2.17927e-11	1.79057e-11	1.57684e-11	1.82289e-11	2.18579e-11
2.88	1.99897e-11	2.30443e-11	2.14687e-11	2.14687e-11	2.71275e-11	2.24726e-11	2.56045e-11	2.39221e-11	2.24237e-11	3.36531e-11	2.04087e-11	1.58735e-11	3.05977e-11	2.44123e-11	2.94534e-11	2.23779e-11	1.92222e-11	2.05124e-11	1.62266e-11	2.75872e-11	2.27564e-11	1.91908e-11	1.99096e-11	2.40344e-11	2.17878e-11	1.79073e-11	1.57641e-11	1.82273e-11	2.1854e-11
2.9	1.99847e-11	2.3042e-11	2.14731e-11	2.14731e-11	2.7127e-11	2.24782e-11	2.56029e-11	2.39155e-11	2.24263e-11	3.36532e-11	2.04176e-11	1.58694e-11	3.05909e-11	2.44163e-11	2.94541e-11	2.23708e-11	1.92187e-11	2.05211e-11	1.62431e-11	2.75819e-11	2.27586e-11	1.91932e-11	1.99052e-11	2.40314e-11	2.17871e-11	1.78928e-11	1.57619e-11	1.82225e-11	2.18486e-11
2.92	1.99857e-11	2.30425e-11	2.14685e-11	2.14685e-11	2.71218e-11	2.2472e-11	2.56018e-11	2.39112e-11	2.24288e-11	3.36495e-11	2.04144e-11	1.58725e-11	3.05923e-11	2.4417e-11	2.94545e-11	2.23763e-11	1.92224e-11	2.05238e-11	1.62209e-11	2.75925e-11	2.27512e-11	1.91924e-11	1.99087e-11	2.4035e-11	2.17928e-11	1.7898e-11	1.57659e-11	1.82277e-11	2.18564e-11
2.94	1.99898e-11	2.30465e-11	2.14806e-11	2.14806e-11	2.71236e-11	2.24758e-11	2.56056e-11	2.39193e-11	2.24256e-11	3.36519e-11	2.04191e-11	1.58703e-11	3.05943e-11	2.44078e-11	2.94507e-11	2.23724e-11	1.92281e-11	2.05162e-11	1.62209e-11	2.75582e-11	2.27521e-11	1.92005e-11	1.99074e-11	2.40297e-11	2.17907e-11	1.79019e-11	1.57629e-11	1.82242e-11	2.18571e-11
2.96	1.99863e-11	2.30434e-11	2.1473e-11	2.1473e-11	2.71223e-11	2.24732e-11	2.56035e-11	2.39142e-11	2.24274e-11	3.36464e-11	2.04154e-11	1.58728e-11	3.05893e-11	2.4412e-11	2.94566e-11	2.23761e-11	1.92228e-11	2.05233e-11	1.62243e-11	2.75744e-11	2.27571e-11	1.91951e-11	1.99127e-11	2.40284e-11	2.17907e-11	1.78948e-11	1.57654e-11	1.82271e-11	2.18542e-11
2.98	1.99853e-11	2.30429e-11	2.1473e-11	2.1473e-11	2.71226e-11	2.24772e-11	2.56056e-11	2.3916e-11	2.24239e-11	3.36549e-11	2.04157e-11	1.58677e-11	3.05885e-11	2.44086e-11	2.94461e-11	2.23775e-11	1.92197e-11	2.05248e-11	1.62206e-11	2.75725e-11	2.2763e-11	1.91964e-11	1.99108e-11	2.40321e-11	2.17953e-11	1.78969e-11	1.57696e-11	1.82389e-11	2.18553e-11
3	1.99912e-11	2.304e-11	2.14716e-11	2.14716e-11	2.71262e-11	2.24812e-11	2.55939e-11	2.39113e-11	2.24237e-11	3.36522e-11	2.04119e-11	1.58679e-11	3.05921e-11	2.44131e-11	2.94526e-11	2.23743e-11	1.92209e-11	2.05268e-11	1.6227e-11	2.7561e-11	2.27477e-11	1.91991e-11	1.99047e-11	2.40358e-11	2.17881e-11	1.78922e-11	1.57559e-11	1.8226e-11	2.18543e-11
3.02	1.99877e-11	2.30453e-11	2.14734e-11	2.14734e-11	2.71221e-11	2.24761e-11	2.56064e-11	2.39216e-11	2.24267e-11	3.36545e-11	2.04154e-11	1.5876e-11	3.05883e-11	2.44092e-11	2.94568e-11	2.23745e-11	1.92266e-11	2.05282e-11	1.62162e-11	2.75453e-11	2.27564e-11	1.91986e-11	1.99091e-11	2.40331e-11	2.17921e-11	1.78919e-11	1.5771e-11	1.82179e-11	2.18608e-11
3.04	1.99912e-11	2.30416e-11	2.14688e-11	2.14688e-11	2.71211e-11	2.24742e-11	2.56e-11	2.39191e-11	2.24278e-11	3.36544e-11	2.04111e-11	1.58697e-11	3.05969e-11	2.44156e-11	2.94524e-11	2.2378e-11	1.92244e-11	2.05256e-11	1.62226e-11	2.75742e-11	2.27594e-11	1.91916e-11	1.99154e-11	2.40338e-11	2.17867e-11	1.79151e-11	1.57731e-11	1.82275e-11	2.18593e-11
3.06	1.99911e-11	2.30384e-11	2.14664e-11	2.14664e-11	2.71249e-11	2.24766e-11	2.5604e-11	2.39136e-11	2.2425e-11	3.36493e-11	2.04158e-11	1.58765e-11	3.05893e-11	2.44153e-11	2.94467e-11	2.23748e-11	1.92196e-11	2.0519e-11	1.62215e-11	2.75762e-11	2.27576e-11	1.91997e-11	1.99135e-11	2.40303e-11	2.17933e-11	1.79091e-11	1.57719e-11	1.8225e-11	2.1853e-11
3.08	1.99982e-11	2.30401e-11	2.14772e-11	2.14772e-11	2.71216e-11	2.24795e-11	2.56058e-11	2.39188e-11	2.24305e-11	3.36571e-11	2.0409e-11	1.58697e-11	3.05902e-11	2.44094e-11	2.94551e-11	2.23697e-11	1.92192e-11	2.05208e-11	1.6224e-11	2.75844e-11	2.27503e-11	1.9199e-11	1.9909e-11	2.40325e-11	2.179e-11	1.79001e-11	1.57724e-11	1.82221e-11	2.18497e-11
3.1	1.99881e-11	2.30455e-11	2.14704e-11	2.14704e-11	2.7119e-11	2.2466e-11	2.56011e-11	2.3924e-11	2.24285e-11	3.36562e-11	2.04115e-11	1.58716e-11	3.05979e-11	2.44082e-11	2.94474e-11	2.23736e-11	1.92193e-11	2.05253e-11	1.62255e-11	2.75874e-11	2.27533e-11	1.91959e-11	1.9912e-11	2.40378e-11	2.17941e-11	1.79009e-11	1.57678e-11	1.82248e-11	2.18574e-11
3.12	1.99924e-11	2.30418e-11	2.14729e-11	2.14729e-11	2.71206e-11	2.24743e-11	2.56027e-11	2.39222e-11	2.24302e-11	3.36464e-11	2.04117e-11	1.58782e-11	3.05965e-11	2.44102e-11	2.94529e-11	2.23709e-11	1.92216e-11	2.05168e-11	1.62121e-11	2.75409e-11	2.27568e-11	1.91943e-11	1.99112e-11	2.40343e-11	2.17988e-11	1.78978e-11	1.57806e-11	1.82305e-11	2.18552e-11
3.14	1.99958e-11	2.30411e-11	2.14746e-11	2.14746e-11	2.71182e-11	2.24767e-11	2.56041e-11	2.39187e-11	2.24267e-11	3.36535e-11	2.04129e-11	1.5872e-11	3.05943e-11	2.44124e-11	2.94554e-11	2.23755e-11	1.92199e-11	2.05273e-11	1.62122e-11	2.75552e-11	2.27561e-11	1.92004e-11	1.99129e-11	2.40362e-11	2.17858e-11	1.79065e-11	1.57725e-11	1.82311e-11	2.18506e-11
3.16	1.9997e-11	2.3038e-11	2.14741e-11	2.14741e-11	2.71214e-11	2.24818e-11	2.56027e-11	2.39148e-11	2.24265e-11	3.36515e-11	2.0417e-11	1.58756e-11	3.05912e-11	2.44168e-11	2.94541e-11	2.2375e-11	1.92287e-11	2.05205e-11	1.62245e-11	2.75389e-11	2.27571e-11	1.91948e-11	1.99119e-11	2.40292e-11	2.17917e-11	1.79038e-11	1.57683e-11	1.82257e-11	2.18523e-11
3.18	1.99934e-11	2.30426e-11	2.14769e-11	2.14769e-11	2.71281e-11	2.248e-11	2.56092e-11	2.39189e-11	2.24357e-11	3.36569e-11	2.04078e-11	1.58731e-11	3.05939e-11	2.44151e-11	2.94541e-11	2.23756e-11	1.92247e-11	2.05155e-11	1.62218e-11	2.76021e-11	2.27547e-11	1.91919e-11	1.99104e-11	2.40329e-11	2.17931e-11	1.79005e-11	1.57634e-11	1.82296e-11	2.18496e-11
3.2	1.99878e-11	2.30416e-11	2.14763e-11	2.14763e-11	2.71275e-11	2.24759e-11	2.56069e-11	2.39147e-11	2.24288e-11	3.36532e-11	2.04118e-11	1.58765e-11	3.05889e-11	2.44073e-11	2.94436e-11	2.23749e-11	1.92227e-11	2.05257e-11	1.62104e-11	2.76042e-11	2.27569e-11	1.91911e-11	1.9916e-11	2.40383e-11	2.17927e-11	1.78915e-11	1.5763e-11	1.82308e-11	2.18586e-11
3.22	1.99927e-11	2.30373e-11	2.14699e-11	2.14699e-11	2.71285e-11	2.2479e-11	2.56031e-11	2.39148e-11	2.24353e-11	3.36602e-11	2.04109e-11	1.58716e-11	3.05977e-11	2.44159e-11	2.94478e-11	2.23785e-11	1.92242e-11	2.05216e-11	1.621e-11	2.75593e-11	2.27594e-11	1.91925e-11	1.99132e-11	2.4029e-11	2.17949e-11	1.78957e-11	1.57751e-11	1.82277e-11	2.18576e-11
3.24	1.99986e-11	2.30453e-11	2.14722e-11	2.14722e-11	2.71248e-11	2.24761e-11	2.56084e-11	2.39157e-11	2.24317e-11	3.36485e-11	2.041e-11	1.58735e-11	3.0593e-11	2.44084e-11	2.94544e-11	2.23742e-11	1.92189e-11	2.05158e-11	1.6217e-11	2.7589e-11	2.27552e-11	1.91883e-11	1.99088e-11	2.40344e-11	2.17932e-11	1.78931e-11	1.5765e-11	1.82298e-11	2.18519e-11
3.26	1.99924e-11	2.30481e-11	2.14676e-11	2.14676e-11	2.71226e-11	2.24821e-11	2.56021e-11	2.39156e-11	2.24282e-11	3.36536e-11	2.04122e-11	1.58745e-11	3.05841e-11	2.44154e-11	2.94557e-11	2.23766e-11	1.92295e-11	2.05152e-11	1.62245e-11	2.75933e-11	2.27541e-11	1.91942e-11	1.99142e-11	2.40305e-11	2.17926e-11	1.78964e-11	1.57826e-11	1.82268e-11	2.1861e-11
3.28	1.99961e-11	2.30391e-11	2.14745e-11	2.14745e-11	2.71269e-11	2.24839e-11	2.5605e-11	2.39171e-11	2.24253e-11	3.36534e-11	2.04105e-11	1.58746e-11	3.05884e-11	2.44108e-11	2.945e-11	2.23801e-11	1.92237e-11	2.0518e-11	1.62201e-11	2.76063e-11	2.27555e-11	1.91934e-11	1.99098e-11	2.40355e-11	2.17946e-11	1.78944e-11	1.57649e-11	1.8231e-11	2.18632e-11
3.3	1.99875e-11	2.30442e-11	2.14766e-11	2.14766e-11	2.71246e-11	2.24778e-11	2.56021e-11	2.39215e-11	2.24287e-11	3.36534e-11	2.04142e-11	1.58703e-11	3.06013e-11	2.44147e-11	2.94537e-11	2.23804e-11	1.92247e-11	2.05145e-11	1.62241e-11	2.75929e-11	2.27546e-11	1.91941e-11	1.99087e-11	2.40311e-11	2.17879e-11	1.79027e-11	1.57663e-11	1.82248e-11	2.18525e-11
3.32	1.99833e-11	2.30381e-11	2.14772e-11	2.14772e-11	2.71224e-11	2.24779e-11	2.56021e-11	2.39156e-11	2.24304e-11	3.36579e-11	2.0415e-11	1.58725e-11	3.05906e-11	2.44078e-11	2.94534e-11	2.2381e-11	1.92241e-11	2.05103e-11	1.62287e-11	2.76045e-11	2.27584e-11	1.91909e-11	1.99119e-11	2.40355e-11	2.17936e-11	1.79048e-11	1.57798e-11	1.82282e-11	2.18509e-11
3.34	1.9995e-11	2.3047e-11	2.1473e-11	2.1473e-11	2.71252e-11	2.2478e-11	2.56091e-11	2.39114e-11	2.24289e-11	3.36529e-11	2.04101e-11	1.5876e-11	3.05928e-11	2.44144e-11	2.94568e-11	2.23733e-11	1.92244e-11	2.05143e-11	1.62198e-11	2.75985e-11	2.27549e-11	1.91922e-11	1.99123e-11	2.40322e-11	2.17922e-11	1.79001e-11	1.57668e-11	1.82245e-11	2.18535e-11
3.36	1.99926e-11	2.30383e-11	2.14693e-11	2.14693e-11	2.71256e-11	2.24677e-11	2.56046e-11	2.39112e-11	2.24288e-11	3.36578e-11	2.04153e-11	1.58718e-11	3.05935e-11	2.44123e-11	2.94513e-11	2.2376e-11	1.92186e-11	2.0517e-11	1.62169e-11	2.75708e-11	2.27532e-11	1.91942e-11	1.99191e-11	2.40338e-11	2.1794e-11	1.78987e-11	1.57727e-11	1.8226e-11	2.18538e-11
3.38	1.99949e-11	2.30453e-11	2.14735e-11	2.14735e-11	2.7131e-11	2.24728e-11	2.56113e-11	2.39153e-11	2.24262e-11	3.3654e-11	2.04176e-11	1.58723e-11	3.05979e-11	2.44131e-11	2.94528e-11	2.23809e-11	1.92262e-11	2.0518e-11	1.62147e-11	2.75573e-11	2.27569e-11	1.91943e-11	1.99111e-11	2.40312e-11	2.17897e-11	1.78922e-11	1.57692e-11	1.82307e-11	2.18575e-11
3.4	1.99873e-11	2.30445e-11	2.14782e-11	2.14782e-11	2.71206e-11	2.24687e-11	2.56087e-11	2.39127e-11	2.24302e-11	3.36589e-11	2.04077e-11	1.5876e-11	3.05949e-11	2.44127e-11	2.94574e-11	2.23718e-11	1.92255e-11	2.05188e-11	1.62223e-11	2.75706e-11	2.27608e-11	1.91933e-11	1.9915e-11	2.40361e-11	2.17884e-11	1.79004e-11	1.57732e-11	1.8224e-11	2.18538e-11
3.42	1.99906e-11	2.30451e-11	2.14729e-11	2.14729e-11	2.7127e-11	2.24708e-11	2.561e-11	2.39159e-11	2.2425e-11	3.36505e-11	2.04131e-11	1.58748e-11	3.05943e-11	2.44135e-11	2.94522e-11	2.23838e-11	1.92238e-11	2.05161e-11	1.62273e-11	2.75526e-11	2.27595e-11	1.91953e-11	1.99111e-11	2.40335e-11	2.17916e-11	1.7899e-11	1.577e-11	1.8228e-11	2.18594e-11
3.44	1.99925e-11	2.30473e-11	2.14734e-11	2.14734e-11	2.71268e-11	2.24776e-11	2.56065e-11	2.39178e-11	2.24312e-11	3.36625e-11	2.04158e-11	1.58744e-11	3.05878e-11	2.44077e-11	2.94547e-11	2.23804e-11	1.92246e-11	2.05204e-11	1.62252e-11	2.75994e-11	2.27631e-11	1.91961e-11	1.99134e-11	2.4035e-11	2.17932e-11	1.78934e-11	1.57612e-11	1.82267e-11	2.18529e-11
3.46	1.9984e-11	2.30468e-11	2.1474e-11	2.1474e-11	2.71199e-11	2.24729e-11	2.56112e-11	2.39166e-11	2.243e-11	3.36498e-11	2.04114e-11	1.58752e-11	3.05965e-11	2.441e-11	2.94528e-11	2.23772e-11	1.92243e-11	2.05208e-11	1.62209e-11	2.75608e-11	2.27566e-11	1.91936e-11	1.99156e-11	2.40322e-11	2.17982e-11	1.78923e-11	1.57663e-11	1.82217e-11	2.18569e-11
3.48	1.99882e-11	2.30422e-11	2.14739e-11	2.14739e-11	2.71229e-11	2.24735e-11	2.56088e-11	2.39163e-11	2.24265e-11	3.36167e-11	2.04156e-11	1.58751e-11	3.05919e-11	2.44101e-11	2.94544e-11	2.23747e-11	1.92262e-11	2.05193e-11	1.62138e-11	2.75874e-11	2.27607e-11	1.91928e-11	1.99142e-11	2.40317e-11	2.1794e-11	1.78802e-11	1.5766e-11	1.82256e-11	2.18532e-11
3.5	1.99884e-11	2.30404e-11	2.14739e-11	2.14739e-11	2.71256e-11	2.24783e-11	2.56094e-11	2.39122e-11	2.24308e-11	3.36179e-11	2.04132e-11	1.58775e-11	3.05942e-11	2.4409e-11	2.9456e-11	2.23753e-11	1.92189e-11	2.05255e-11	1.62273e-11	2.75588e-11	2.27533e-11	1.91968e-11	1.99103e-11	2.4034e-11	2.17866e-11	1.78811e-11	1.57774e-11	1.82328e-11	2.18582e-11
3.52	1.99951e-11	2.30484e-11	2.14647e-11	2.14647e-11	2.71194e-11	2.24722e-11	2.56018e-11	2.39151e-11	2.24289e-11	3.36169e-11	2.04153e-11	1.58708e-11	3.05929e-11	2.4407e-11	2.94552e-11	2.23763e-11	1.92217e-11	2.05257e-11	1.62318e-11	2.759e-11	2.27531e-11	1.91965e-11	1.99106e-11	2.40372e-11	2.17913e-11	1.78955e-11	1.57702e-11	1.82227e-11	2.18517e-11
3.54	1.99886e-11	2.30423e-11	2.14749e-11	2.14749e-11	2.71252e-11	2.2474e-11	2.56102e-11	2.39146e-11	2.24293e-11	3.35925e-11	2.04175e-11	1.58753e-11	3.05965e-11	2.44149e-11	2.94536e-11	2.23788e-11	1.9225e-11	2.05184e-11	1.62174e-11	2.75888e-11	2.27585e-11	1.91953e-11	1.9916e-11	2.40363e-11	2.17882e-11	1.789e-11	1.57704e-11	1.82322e-11	2.18494e-11
3.56	1.99894e-11	2.30354e-11	2.14685e-11	2.14685e-11	2.71174e-11	2.24715e-11	2.56094e-11	2.39123e-11	2.24155e-11	3.36076e-11	2.04106e-11	1.5879e-11	3.05851e-11	2.44157e-11	2.94575e-11	2.23708e-11	1.92238e-11	2.052e-11	1.6215e-11	2.75839e-11	2.27561e-11	1.91891e-11	1.9913e-11	2.40383e-11	2.17896e-11	1.79019e-11	1.57584e-11	1.8229e-11	2.18482e-11
3.58	1.99846e-11	2.30423e-11	2.14799e-11	2.14799e-11	2.71202e-11	2.24722e-11	2.5606e-11	2.39174e-11	2.23736e-11	3.36009e-11	2.04122e-11	1.58807e-11	3.05914e-11	2.4412e-11	2.94546e-11	2.23782e-11	1.92234e-11	2.05121e-11	1.62279e-11	2.75718e-11	2.27551e-11	1.91967e-11	1.99102e-11	2.40327e-11	2.17883e-11	1.78989e-11	1.57628e-11	1.82335e-11	2.18516e-11
3.6	1.99977e-11	2.30416e-11	2.14728e-11	2.14728e-11	2.71243e-11	2.24676e-11	2.56026e-11	2.39162e-11	2.23506e-11	3.35874e-11	2.04141e-11	1.5876e-11	3.05878e-11	2.441e-11	2.94537e-11	2.23778e-11	1.92231e-11	2.0518e-11	1.62112e-11	2.76164e-11	2.27578e-11	1.91931e-11	1.9917e-11	2.40315e-11	2.17909e-11	1.79047e-11	1.57641e-11	1.82286e-11	2.18535e-11
3.62	1.99914e-11	2.30414e-11	2.14728e-11	2.14728e-11	2.71223e-11	2.24695e-11	2.56106e-11	2.39157e-11	2.23073e-11	3.35926e-11	2.04173e-11	1.58772e-11	3.05948e-11	2.44113e-11	2.9456e-11	2.2376e-11	1.92159e-11	2.05213e-11	1.62187e-11	2.76143e-11	2.27621e-11	1.91906e-11	1.99132e-11	2.40393e-11	2.17875e-11	1.78979e-11	1.57764e-11	1.82258e-11	2.18487e-11
3.64	1.99913e-11	2.30442e-11	2.14779e-11	2.14779e-11	2.712e-11	2.24777e-11	2.56036e-11	2.39219e-11	2.22931e-11	3.36359e-11	2.04134e-11	1.58778e-11	3.05913e-11	2.44127e-11	2.94562e-11	2.23745e-11	1.92257e-11	2.05134e-11	1.62043e-11	2.76183e-11	2.27561e-11	1.91959e-11	1.9913e-11	2.40342e-11	2.17901e-11	1.78885e-11	1.57638e-11	1.82256e-11	2.1854e-11
3.66	1.99899e-11	2.30486e-11	2.14719e-11	2.14719e-11	2.71192e-11	2.2474e-11	2.56115e-11	2.39131e-11	2.22744e-11	3.36339e-11	2.04215e-11	1.58745e-11	3.05922e-11	2.4413e-11	2.94596e-11	2.23714e-11	1.92182e-11	2.0518e-11	1.62169e-11	2.76001e-11	2.27561e-11	1.91905e-11	1.99156e-11	2.40348e-11	2.17857e-11	1.79053e-11	1.57638e-11	1.82284e-11	2.18495e-11
3.68	1.99948e-11	2.30432e-11	2.14718e-11	2.14718e-11	2.71256e-11	2.24703e-11	2.5606e-11	2.39149e-11	2.22614e-11	3.36291e-11	2.04134e-11	1.58726e-11	3.05945e-11	2.44141e-11	2.94603e-11	2.23721e-11	1.92306e-11	2.05135e-11	1.62203e-11	2.76162e-11	2.27497e-11	1.91923e-11	1.99132e-11	2.4038e-11	2.17849e-11	1.79081e-11	1.57788e-11	1.82324e-11	2.18495e-11
3.7	1.99957e-11	2.30474e-11	2.14787e-11	2.14787e-11	2.71265e-11	2.24773e-11	2.56022e-11	2.39176e-11	2.2255e-11	3.36314e-11	2.04151e-11	1.58745e-11	3.05929e-11	2.44113e-11	2.94541e-11	2.23727e-11	1.92233e-11	2.05229e-11	1.62339e-11	2.76027e-11	2.27589e-11	1.91977e-11	1.99099e-11	2.40332e-11	2.17893e-11	1.7898e-11	1.57629e-11	1.82308e-11	2.18501e-11
3.72	1.99975e-11	2.30442e-11	2.14711e-11	2.14711e-11	2.71236e-11	2.24821e-11	2.56034e-11	2.39151e-11	2.22495e-11	3.36241e-11	2.04136e-11	1.58734e-11	3.0595e-11	2.44125e-11	2.94532e-11	2.23826e-11	1.9222e-11	2.05095e-11	1.62279e-11	2.75772e-11	2.27591e-11	1.91894e-11	1.99131e-11	2.40361e-11	2.17929e-11	1.79087e-11	1.57643e-11	1.82325e-11	2.18517e-11
3.74	1.99868e-11	2.30414e-11	2.14743e-11	2.14743e-11	2.71178e-11	2.24725e-11	2.5613e-11	2.39178e-11	2.22453e-11	3.36185e-11	2.04163e-11	1.58703e-11	3.05951e-11	2.44099e-11	2.94447e-11	2.23751e-11	1.92269e-11	2.0516e-11	1.62181e-11	2.75714e-11	2.27587e-11	1.91919e-11	1.99175e-11	2.40356e-11	2.17898e-11	1.7913e-11	1.57515e-11	1.82299e-11	2.1857e-11
3.76	1.99862e-11	2.30424e-11	2.14759e-11	2.14759e-11	2.7127e-11	2.2476e-11	2.56096e-11	2.39174e-11	2.22469e-11	3.36251e-11	2.04165e-11	1.58775e-11	3.05928e-11	2.44086e-11	2.9453e-11	2.23736e-11	1.92274e-11	2.05145e-11	1.62109e-11	2.758e-11	2.27483e-11	1.9191e-11	1.9912e-11	2.40357e-11	2.17913e-11	1.79051e-11	1.57744e-11	1.82314e-11	2.18535e-11
3.78	1.99921e-11	2.30342e-11	2.14741e-11	2.14741e-11	2.71206e-11	2.24659e-11	2.56067e-11	2.3916e-11	2.22447e-11	3.3663e-11	2.04178e-11	1.58756e-11	3.05918e-11	2.44113e-11	2.9446e-11	2.23756e-11	1.92266e-11	2.05102e-11	1.62171e-11	2.75678e-11	2.27479e-11	1.92031e-11	1.99114e-11	2.40353e-11	2.17927e-11	1.7903e-11	1.57595e-11	1.82266e-11	2.18441e-11
3.8	1.99916e-11	2.30437e-11	2.14745e-11	2.14745e-11	2.71241e-11	2.24828e-11	2.56062e-11	2.39197e-11	2.22441e-11	3.36449e-11	2.04179e-11	1.58764e-11	3.05939e-11	2.44132e-11	2.94524e-11	2.23788e-11	1.92258e-11	2.05208e-11	1.62229e-11	2.75841e-11	2.27488e-11	1.91971e-11	1.99139e-11	2.40365e-11	2.17979e-11	1.79119e-11	1.57631e-11	1.82358e-11	2.18589e-11
3.82	1.99857e-11	2.30465e-11	2.14717e-11	2.14717e-11	2.71258e-11	2.24767e-11	2.56061e-11	2.39195e-11	2.22356e-11	3.36467e-11	2.04184e-11	1.58743e-11	3.05916e-11	2.44078e-11	2.94597e-11	2.23752e-11	1.9224e-11	2.05213e-11	1.62253e-11	2.75753e-11	2.27531e-11	1.91961e-11	1.99113e-11	2.40378e-11	2.17927e-11	1.79018e-11	1.57701e-11	1.82278e-11	2.1848e-11
3.84	1.99929e-11	2.30494e-11	2.1475e-11	2.1475e-11	2.71225e-11	2.24851e-11	2.56045e-11	2.39224e-11	2.22366e-11	3.36317e-11	2.04173e-11	1.58748e-11	3.05934e-11	2.44085e-11	2.94488e-11	2.23783e-11	1.92207e-11	2.05181e-11	1.6212e-11	2.75843e-11	2.27568e-11	1.91961e-11	1.99134e-11	2.40312e-11	2.17996e-11	1.7913e-11	1.5763e-11	1.82244e-11	2.1852e-11
3.86	1.99992e-11	2.30365e-11	2.14686e-11	2.14686e-11	2.71177e-11	2.24771e-11	2.56089e-11	2.39174e-11	2.22334e-11	3.36513e-11	2.04126e-11	1.5876e-11	3.05953e-11	2.44108e-11	2.945e-11	2.23776e-11	1.92223e-11	2.05211e-11	1.6225e-11	2.75827e-11	2.27536e-11	1.91962e-11	1.99108e-11	2.40366e-11	2.1791e-11	1.79064e-11	1.57669e-11	1.82308e-11	2.18491e-11
3.88	1.99946e-11	2.30435e-11	2.14725e-11	2.14725e-11	2.71219e-11	2.2475e-11	2.56061e-11	2.39125e-11	2.22387e-11	3.36597e-11	2.04159e-11	1.58705e-11	3.05947e-11	2.44097e-11	2.94467e-11	2.23742e-11	1.92219e-11	2.05096e-11	1.62288e-11	2.7559e-11	2.27556e-11	1.92003e-11	1.99081e-11	2.40345e-11	2.17981e-11	1.79115e-11	1.57618e-11	1.82324e-11	2.18504e-11
3.9	1.99952e-11	2.30454e-11	2.14778e-11	2.14778e-11	2.71223e-11	2.24816e-11	2.56061e-11	2.39189e-11	2.22315e-11	3.36322e-11	2.0419e-11	1.58768e-11	3.05925e-11	2.44138e-11	2.94497e-11	2.23773e-11	1.92208e-11	2.05112e-11	1.62236e-11	2.76058e-11	2.27473e-11	1.91994e-11	1.99145e-11	2.40364e-11	2.17945e-11	1.79035e-11	1.57614e-11	1.82331e-11	2.18586e-11
3.92	1.99905e-11	2.30539e-11	2.14717e-11	2.14717e-11	2.71249e-11	2.24751e-11	2.56024e-11	2.39165e-11	2.2234e-11	3.36512e-11	2.04196e-11	1.58787e-11	3.05961e-11	2.44089e-11	2.94545e-11	2.23849e-11	1.92209e-11	2.05171e-11	1.62212e-11	2.75888e-11	2.27569e-11	1.91896e-11	1.99126e-11	2.40382e-11	2.17957e-11	1.791e-11	1.57833e-11	1.82267e-11	2.18582e-11
3.94	1.99916e-11	2.30413e-11	2.14715e-11	2.14715e-11	2.71209e-11	2.24727e-11	2.56042e-11	2.39168e-11	2.22321e-11	3.36643e-11	2.04171e-11	1.58779e-11	3.0593e-11	2.44105e-11	2.94512e-11	2.23769e-11	1.92266e-11	2.05221e-11	1.62194e-11	2.75427e-11	2.2744e-11	1.91978e-11	1.99114e-11	2.40375e-11	2.17915e-11	1.79075e-11	1.57557e-11	1.82262e-11	2.18551e-11
3.96	1.99934e-11	2.30394e-11	2.1475e-11	2.1475e-11	2.71184e-11	2.24667e-11	2.56077e-11	2.39121e-11	2.22315e-11	3.36933e-11	2.04177e-11	1.58757e-11	3.05961e-11	2.44134e-11	2.94546e-11	2.23788e-11	1.92247e-11	2.05205e-11	1.6218e-11	2.75975e-11	2.27539e-11	1.91973e-11	1.99153e-11	2.40318e-11	2.17926e-11	1.78991e-11	1.57574e-11	1.82289e-11	2.18551e-11
3.98	1.99885e-11	2.304e-11	2.14789e-11	2.14789e-11	2.71237e-11	2.24714e-11	2.56091e-11	2.39178e-11	2.2228e-11	3.36802e-11	2.04144e-11	1.58784e-11	3.05973e-11	2.44147e-11	2.94485e-11	2.23771e-11	1.92218e-11	2.05156e-11	1.62126e-11	2.76053e-11	2.27531e-11	1.91933e-11	1.99115e-11	2.40376e-11	2.1793e-11	1.79005e-11	1.57702e-11	1.82342e-11	2.18479e-11
4	1.9993e-11	2.30454e-11	2.14742e-11	2.14742e-11	2.71241e-11	2.24771e-11	2.56075e-11	2.39191e-11	2.22293e-11	3.36916e-11	2.04106e-11	1.5876e-11	3.0597e-11	2.44164e-11	2.94504e-11	2.23795e-11	1.9226e-11	2.05201e-11	1.6213e-11	2.75791e-11	2.27553e-11	1.9201e-11	1.9913e-11	2.40331e-11	2.17921e-11	1.78996e-11	1.57592e-11	1.82278e-11	2.1853e-11
4.02	1.99953e-11	2.30453e-11	2.14699e-11	2.14699e-11	2.71189e-11	2.24779e-11	2.56105e-11	2.39202e-11	2.22254e-11	3.36947e-11	2.04144e-11	1.58759e-11	3.0596e-11	2.44075e-11	2.94535e-11	2.23805e-11	1.92205e-11	2.05185e-11	1.62062e-11	2.76077e-11	2.27558e-11	1.91937e-11	1.99162e-11	2.40356e-11	2.17947e-11	1.78986e-11	1.57641e-11	1.82321e-11	2.18542e-11
4.04	1.99941e-11	2.30413e-11	2.1471e-11	2.1471e-11	2.71234e-11	2.24725e-11	2.56052e-11	2.39154e-11	2.22311e-11	3.36848e-11	2.04156e-11	1.58768e-11	3.05927e-11	2.4413e-11	2.94506e-11	2.23796e-11	1.92259e-11	2.05224e-11	1.621e-11	2.75802e-11	2.2754e-11	1.91905e-11	1.99152e-11	2.40365e-11	2.17877e-11	1.79028e-11	1.57596e-11	1.82282e-11	2.18603e-11
4.06	1.99913e-11	2.30461e-11	2.14756e-11	2.14756e-11	2.71217e-11	2.24712e-11	2.56074e-11	2.39148e-11	2.22305e-11	3.37027e-11	2.04169e-11	1.58775e-11	3.05912e-11	2.44102e-11	2.94501e-11	2.23762e-11	1.92289e-11	2.05295e-11	1.62091e-11	2.76024e-11	2.27627e-11	1.91936e-11	1.99098e-11	2.4031e-11	2.17872e-11	1.79067e-11	1.57595e-11	1.82292e-11	2.1853e-11
4.08	1.99934e-11	2.3046e-11	2.14761e-11	2.14761e-11	2.71255e-11	2.24765e-11	2.56102e-11	2.39126e-11	2.22263e-11	3.37171e-11	2.04145e-11	1.588e-11	3.05906e-11	2.44091e-11	2.94547e-11	2.23761e-11	1.92247e-11	2.0521e-11	1.62099e-11	2.76032e-11	2.27509e-11	1.91963e-11	1.99084e-11	2.40339e-11	2.17874e-11	1.79023e-11	1.57627e-11	1.8222e-11	2.18529e-11
4.1	1.99936e-11	2.30401e-11	2.14752e-11	2.14752e-11	2.71217e-11	2.2471e-11	2.56065e-11	2.39165e-11	2.22243e-11	3.37311e-11	2.04068e-11	1.58771e-11	3.05909e-11	2.44135e-11	2.94486e-11	2.23771e-11	1.92233e-11	2.05264e-11	1.62106e-11	2.76057e-11	2.27542e-11	1.91921e-11	1.99116e-11	2.4042e-11	2.17885e-11	1.79059e-11	1.57749e-11	1.82347e-11	2.18524e-11
4.12	1.9991e-11	2.30462e-11	2.14794e-11	2.14794e-11	2.71214e-11	2.24723e-11	2.56138e-11	2.3918e-11	2.22275e-11	3.37066e-11	2.04093e-11	1.58792e-11	3.05936e-11	2.44144e-11	2.94559e-11	2.23787e-11	1.92176e-11	2.05232e-11	1.62051e-11	2.7602e-11	2.27466e-11	1.91954e-11	1.99161e-11	2.40377e-11	2.179e-11	1.79042e-11	1.57649e-11	1.82308e-11	2.1852e-11
4.14	1.99979e-11	2.30458e-11	2.14776e-11	2.14776e-11	2.71252e-11	2.24785e-11	2.56062e-11	2.39108e-11	2.22269e-11	3.36941e-11	2.04212e-11	1.58807e-11	3.05919e-11	2.4406e-11	2.94498e-11	2.23756e-11	1.92273e-11	2.05277e-11	1.62071e-11	2.76034e-11	2.2759e-11	1.91988e-11	1.9915e-11	2.40384e-11	2.18043e-11	1.79018e-11	1.57804e-11	1.82288e-11	2.18541e-11
4.16	1.99863e-11	2.30474e-11	2.14768e-11	2.14768e-11	2.71178e-11	2.24725e-11	2.56116e-11	2.39188e-11	2.22264e-11	3.37072e-11	2.041e-11	1.5872e-11	3.05994e-11	2.44104e-11	2.94487e-11	2.23705e-11	1.92249e-11	2.05255e-11	1.621e-11	2.762e-11	2.27508e-11	1.91981e-11	1.99169e-11	2.40364e-11	2.17894e-11	1.78994e-11	1.57721e-11	1.82265e-11	2.18651e-11
4.18	1.99946e-11	2.30396e-11	2.14727e-11	2.14727e-11	2.71171e-11	2.24752e-11	2.56068e-11	2.39139e-11	2.22262e-11	3.36872e-11	2.04108e-11	1.58739e-11	3.06e-11	2.44102e-11	2.94473e-11	2.2366e-11	1.92199e-11	2.05239e-11	1.62087e-11	2.75986e-11	2.27507e-11	1.9197e-11	1.99122e-11	2.40392e-11	2.17932e-11	1.79038e-11	1.57645e-11	1.82287e-11	2.18554e-11
4.2	1.99919e-11	2.30413e-11	2.14789e-11	2.14789e-11	2.71194e-11	2.24806e-11	2.56055e-11	2.39193e-11	2.22271e-11	3.36914e-11	2.04105e-11	1.587e-11	3.0598e-11	2.44069e-11	2.94456e-11	2.23688e-11	1.92273e-11	2.05273e-11	1.62182e-11	2.75837e-11	2.27493e-11	1.9196e-11	1.99127e-11	2.4033e-11	2.17925e-11	1.7906e-11	1.57686e-11	1.82318e-11	2.18505e-11
4.22	1.9997e-11	2.30427e-11	2.14728e-11	2.14728e-11	2.71271e-11	2.24789e-11	2.56082e-11	2.39171e-11	2.22264e-11	3.36832e-11	2.04128e-11	1.58754e-11	3.05976e-11	2.44123e-11	2.94559e-11	2.23755e-11	1.92239e-11	2.0526e-11	1.62127e-11	2.75811e-11	2.2756e-11	1.91939e-11	1.99071e-11	2.40269e-11	2.17839e-11	1.79039e-11	1.57665e-11	1.82288e-11	2.18573e-11
4.24	1.99955e-11	2.30365e-11	2.14726e-11	2.14726e-11	2.71209e-11	2.24765e-11	2.56092e-11	2.39153e-11	2.22258e-11	3.37054e-11	2.0415e-11	1.58858e-11	3.05965e-11	2.44094e-11	2.94479e-11	2.23761e-11	1.92253e-11	2.05217e-11	1.62222e-11	2.75971e-11	2.2748e-11	1.91885e-11	1.99137e-11	2.40345e-11	2.17837e-11	1.78921e-11	1.57611e-11	1.82334e-11	2.18548e-11
4.26	1.99956e-11	2.30427e-11	2.14721e-11	2.14721e-11	2.71305e-11	2.24794e-11	2.56044e-11	2.39142e-11	2.22218e-11	3.37043e-11	2.04117e-11	1.58743e-11	3.05952e-11	2.44094e-11	2.94467e-11	2.23734e-11	1.92256e-11	2.05247e-11	1.62237e-11	2.7627e-11	2.27498e-11	1.9202e-11	1.99136e-11	2.40369e-11	2.17916e-11	1.78958e-11	1.57716e-11	1.82287e-11	2.18499e-11
4.28	1.9992e-11	2.3044e-11	2.14732e-11	2.14732e-11	2.71246e-11	2.24838e-11	2.56086e-11	2.39203e-11	2.22253e-11	3.36911e-11	2.04115e-11	1.58841e-11	3.05975e-11	2.44083e-11	2.94517e-11	2.23766e-11	1.92213e-11	2.05252e-11	1.62191e-11	2.76393e-11	2.2751e-11	1.91989e-11	1.99116e-11	2.40429e-11	2.17927e-11	1.78917e-11	1.57671e-11	1.82308e-11	2.18552e-11
4.3	1.99929e-11	2.30445e-11	2.14699e-11	2.14699e-11	2.71221e-11	2.24737e-11	2.56098e-11	2.39146e-11	2.22219e-11	3.3694e-11	2.04148e-11	1.58772e-11	3.05952e-11	2.44081e-11	2.9452e-11	2.23828e-11	1.92232e-11	2.05151e-11	1.62296e-11	2.76291e-11	2.27478e-11	1.92001e-11	1.99126e-11	2.4036e-11	2.17883e-11	1.78901e-11	1.57606e-11	1.82327e-11	2.18529e-11
4.32	1.99871e-11	2.30414e-11	2.14764e-11	2.14764e-11	2.71222e-11	2.2482e-11	2.5608e-11	2.39189e-11	2.22234e-11	3.36835e-11	2.04096e-11	1.58775e-11	3.0596e-11	2.44182e-11	2.94559e-11	2.23825e-11	1.92258e-11	2.05163e-11	1.62247e-11	2.75991e-11	2.27525e-11	1.91956e-11	1.99143e-11	2.40309e-11	2.178e-11	1.78955e-11	1.57742e-11	1.82302e-11	2.18481e-11
4.34	1.99927e-11	2.30417e-11	2.1469e-11	2.1469e-11	2.71246e-11	2.24815e-11	2.56112e-11	2.3923e-11	2.22262e-11	3.36775e-11	2.04154e-11	1.58769e-11	3.05992e-11	2.44084e-11	2.94481e-11	2.23754e-11	1.92164e-11	2.05196e-11	1.62245e-11	2.75971e-11	2.275e-11	1.91926e-11	1.99106e-11	2.4038e-11	2.17914e-11	1.79071e-11	1.57735e-11	1.8231e-11	2.18551e-11
4.36	1.99952e-11	2.3047e-11	2.14728e-11	2.14728e-11	2.71286e-11	2.24836e-11	2.56122e-11	2.39187e-11	2.222e-11	3.36857e-11	2.04146e-11	1.58817e-11	3.05949e-11	2.4406e-11	2.94528e-11	2.23809e-11	1.92229e-11	2.05179e-11	1.62282e-11	2.76189e-11	2.27467e-11	1.91948e-11	1.9909e-11	2.40371e-11	2.17796e-11	1.78922e-11	1.57668e-11	1.82294e-11	2.18594e-11
4.38	1.9986e-11	2.3038e-11	2.14743e-11	2.14743e-11	2.71219e-11	2.24665e-11	2.56113e-11	2.39213e-11	2.22242e-11	3.36867e-11	2.04162e-11	1.58759e-11	3.06001e-11	2.44127e-11	2.94545e-11	2.23757e-11	1.92192e-11	2.05171e-11	1.62199e-11	2.76287e-11	2.27496e-11	1.91962e-11	1.99092e-11	2.40323e-11	2.17843e-11	1.78957e-11	1.5761e-11	1.82286e-11	2.18625e-11
4.4	1.99926e-11	2.30451e-11	2.14757e-11	2.14757e-11	2.71248e-11	2.24737e-11	2.56017e-11	2.39145e-11	2.2225e-11	3.3677e-11	2.04151e-11	1.58777e-11	3.05986e-11	2.44033e-11	2.94535e-11	2.23796e-11	1.92185e-11	2.05146e-11	1.62191e-11	2.7568e-11	2.27532e-11	1.9193e-11	1.99129e-11	2.40422e-11	2.17935e-11	1.78944e-11	1.57723e-11	1.82302e-11	2.18511e-11
4.42	1.99974e-11	2.304e-11	2.1476e-11	2.1476e-11	2.71239e-11	2.24776e-11	2.56081e-11	2.39239e-11	2.22313e-11	3.37002e-11	2.04158e-11	1.587e-11	3.05915e-11	2.44128e-11	2.94516e-11	2.23825e-11	1.92196e-11	2.05124e-11	1.62151e-11	2.76351e-11	2.27566e-11	1.91949e-11	1.99135e-11	2.40422e-11	2.17804e-11	1.78935e-11	1.57748e-11	1.82361e-11	2.18419e-11
4.44	1.99927e-11	2.30464e-11	2.14754e-11	2.14754e-11	2.71276e-11	2.24733e-11	2.56054e-11	2.39144e-11	2.2222e-11	3.36863e-11	2.04121e-11	1.58831e-11	3.05981e-11	2.44085e-11	2.94533e-11	2.23809e-11	1.92234e-11	2.05159e-11	1.62302e-11	2.75869e-11	2.27483e-11	1.91933e-11	1.99109e-11	2.40325e-11	2.17839e-11	1.789e-11	1.576e-11	1.82311e-11	2.18457e-11
4.46	1.99913e-11	2.30453e-11	2.14737e-11	2.14737e-11	2.7118e-11	2.24753e-11	2.56096e-11	2.39165e-11	2.22228e-11	3.36861e-11	2.04128e-11	1.58836e-11	3.05961e-11	2.44137e-11	2.94541e-11	2.23765e-11	1.92198e-11	2.05203e-11	1.62216e-11	2.76176e-11	2.27483e-11	1.91942e-11	1.99158e-11	2.40428e-11	2.17854e-11	1.78961e-11	1.57723e-11	1.82263e-11	2.18499e-11
4.48	1.99892e-11	2.30431e-11	2.14746e-11	2.14746e-11	2.71192e-11	2.24615e-11	2.56028e-11	2.39173e-11	2.2226e-11	3.36897e-11	2.04146e-11	1.58781e-11	3.06027e-11	2.44076e-11	2.94539e-11	2.23826e-11	1.92235e-11	2.0517e-11	1.62251e-11	2.76383e-11	2.27507e-11	1.91937e-11	1.99129e-11	2.40356e-11	2.17871e-11	1.79048e-11	1.57732e-11	1.82316e-11	2.18461e-11
4.5	1.99947e-11	2.30474e-11	2.1474e-11	2.1474e-11	2.71265e-11	2.24435e-11	2.56038e-11	2.3917e-11	2.22266e-11	3.36918e-11	2.04151e-11	1.58738e-11	3.06054e-11	2.44103e-11	2.94488e-11	2.23736e-11	1.92248e-11	2.0523e-11	1.62158e-11	2.76086e-11	2.27478e-11	1.91935e-11	1.9918e-11	2.40348e-11	2.17895e-11	1.78894e-11	1.57688e-11	1.82264e-11	2.18567e-11
4.52	1.99879e-11	2.30403e-11	2.14732e-11	2.14732e-11	2.71272e-11	2.24087e-11	2.56101e-11	2.39154e-11	2.22265e-11	3.36809e-11	2.04157e-11	1.58597e-11	3.05969e-11	2.44127e-11	2.94582e-11	2.23804e-11	1.92297e-11	2.05208e-11	1.62189e-11	2.76309e-11	2.27511e-11	1.91961e-11	1.99134e-11	2.40373e-11	2.17887e-11	1.78941e-11	1.57692e-11	1.82273e-11	2.18542e-11
4.54	1.99947e-11	2.30429e-11	2.14743e-11	2.14743e-11	2.71211e-11	2.23783e-11	2.56087e-11	2.39185e-11	2.22279e-11	3.3685e-11	2.04121e-11	1.58354e-11	3.06034e-11	2.44091e-11	2.94498e-11	2.2376e-11	1.92182e-11	2.05146e-11	1.62286e-11	2.76111e-11	2.27532e-11	1.92005e-11	1.99106e-11	2.40364e-11	2.17861e-11	1.78973e-11	1.57786e-11	1.82287e-11	2.1854e-11
4.56	1.99949e-11	2.30485e-11	2.14774e-11	2.14774e-11	2.71241e-11	2.23399e-11	2.56026e-11	2.39146e-11	2.22268e-11	3.36969e-11	2.04189e-11	1.58057e-11	3.05981e-11	2.4409e-11	2.94513e-11	2.2374e-11	1.92242e-11	2.05215e-11	1.62052e-11	2.75656e-11	2.27526e-11	1.91932e-11	1.9916e-11	2.40358e-11	2.17919e-11	1.78921e-11	1.57705e-11	1.82309e-11	2.18541e-11
4.58	1.99922e-11	2.30435e-11	2.1473e-11	2.1473e-11	2.71184e-11	2.22936e-11	2.56116e-11	2.39224e-11	2.22248e-11	3.36839e-11	2.04121e-11	1.57772e-11	3.05978e-11	2.44123e-11	2.94542e-11	2.23761e-11	1.92277e-11	2.05189e-11	1.6217e-11	2.76288e-11	2.27464e-11	1.91985e-11	1.99111e-11	2.40372e-11	2.1781e-11	1.79005e-11	1.5758e-11	1.82299e-11	2.18472e-11
4.6	1.99961e-11	2.30474e-11	2.1473e-11	2.1473e-11	2.71257e-11	2.22231e-11	2.56063e-11	2.39166e-11	2.22252e-11	3.36904e-11	2.04126e-11	1.57456e-11	3.05965e-11	2.44052e-11	2.94514e-11	2.23762e-11	1.92269e-11	2.05188e-11	1.6225e-11	2.75816e-11	2.27468e-11	1.91971e-11	1.99155e-11	2.40347e-11	2.17856e-11	1.7895e-11	1.57631e-11	1.82275e-11	2.185e-11
4.62	1.99952e-11	2.30445e-11	2.14732e-11	2.14732e-11	2.71233e-11	2.21575e-11	2.56093e-11	2.39236e-11	2.22209e-11	3.36975e-11	2.04124e-11	1.57278e-11	3.05982e-11	2.44116e-11	2.94514e-11	2.23817e-11	1.92191e-11	2.05193e-11	1.62208e-11	2.76335e-11	2.27537e-11	1.92e-11	1.99145e-11	2.40435e-11	2.17835e-11	1.78974e-11	1.577e-11	1.82208e-11	2.18536e-11
4.64	1.99885e-11	2.30487e-11	2.14699e-11	2.14699e-11	2.71224e-11	2.2096e-11	2.56086e-11	2.39183e-11	2.22309e-11	3.36956e-11	2.04123e-11	1.57007e-11	3.06001e-11	2.44095e-11	2.94586e-11	2.23789e-11	1.92188e-11	2.052e-11	1.6215e-11	2.76157e-11	2.27499e-11	1.91949e-11	1.99103e-11	2.40345e-11	2.17819e-11	1.7913e-11	1.57753e-11	1.82323e-11	2.18447e-11
4.66	1.99847e-11	2.30436e-11	2.14703e-11	2.14703e-11	2.71279e-11	2.20814e-11	2.56058e-11	2.39172e-11	2.2225e-11	3.36734e-11	2.04133e-11	1.56807e-11	3.06081e-11	2.44114e-11	2.94569e-11	2.23788e-11	1.92228e-11	2.05188e-11	1.62112e-11	2.76362e-11	2.27553e-11	1.9194e-11	1.99153e-11	2.40332e-11	2.17905e-11	1.78944e-11	1.57724e-11	1.82336e-11	2.18431e-11
4.68	1.99967e-11	2.30508e-11	2.14792e-11	2.14792e-11	2.71187e-11	2.20654e-11	2.5607e-11	2.39147e-11	2.2231e-11	3.36879e-11	2.04128e-11	1.5659e-11	3.05986e-11	2.44105e-11	2.9458e-11	2.23824e-11	1.92257e-11	2.05252e-11	1.62292e-11	2.75759e-11	2.27511e-11	1.91957e-11	1.99205e-11	2.40353e-11	2.17872e-11	1.78983e-11	1.57742e-11	1.82273e-11	2.18467e-11
4.7	1.99951e-11	2.305e-11	2.14672e-11	2.14672e-11	2.71191e-11	2.20634e-11	2.56069e-11	2.39176e-11	2.22241e-11	3.36875e-11	2.04169e-11	1.56452e-11	3.06004e-11	2.44166e-11	2.94587e-11	2.23769e-11	1.92249e-11	2.05136e-11	1.62316e-11	2.76441e-11	2.27473e-11	1.92069e-11	1.99153e-11	2.40381e-11	2.17863e-11	1.79071e-11	1.57584e-11	1.82243e-11	2.18519e-11
4.72	1.99933e-11	2.30451e-11	2.14743e-11	2.14743e-11	2.71246e-11	2.20624e-11	2.56097e-11	2.39141e-11	2.22215e-11	3.36985e-11	2.04155e-11	1.56269e-11	3.06054e-11	2.44139e-11	2.94556e-11	2.23804e-11	1.92245e-11	2.05205e-11	1.62175e-11	2.76698e-11	2.27534e-11	1.9205e-11	1.99175e-11	2.40411e-11	2.1788e-11	1.78979e-11	1.57748e-11	1.82356e-11	2.18479e-11
4.74	1.99923e-11	2.30472e-11	2.14799e-11	2.14799e-11	2.71216e-11	2.20575e-11	2.56092e-11	2.39232e-11	2.22269e-11	3.36954e-11	2.0406e-11	1.5619e-11	3.06006e-11	2.44086e-11	2.94564e-11	2.23729e-11	1.92242e-11	2.05162e-11	1.622e-11	2.7674e-11	2.27533e-11	1.91995e-11	1.99175e-11	2.40375e-11	2.17872e-11	1.7895e-11	1.57678e-11	1.82272e-11	2.18505e-11
4.76	1.9996e-11	2.3049e-11	2.14751e-11	2.14751e-11	2.71196e-11	2.20582e-11	2.56073e-11	2.39216e-11	2.22288e-11	3.36951e-11	2.0411e-11	1.56151e-11	3.06011e-11	2.44114e-11	2.94554e-11	2.23769e-11	1.92217e-11	2.05151e-11	1.62168e-11	2.76648e-11	2.27473e-11	1.91966e-11	1.99217e-11	2.40347e-11	2.17872e-11	1.79025e-11	1.57705e-11	1.82294e-11	2.18482e-11
4.78	1.99925e-11	2.30456e-11	2.14756e-11	2.14756e-11	2.71218e-11	2.20496e-11	2.56041e-11	2.39168e-11	2.22223e-11	3.36891e-11	2.04136e-11	1.56062e-11	3.06062e-11	2.44121e-11	2.94563e-11	2.23766e-11	1.92242e-11	2.052e-11	1.62337e-11	2.76965e-11	2.2752e-11	1.91974e-11	1.99161e-11	2.40329e-11	2.17892e-11	1.78967e-11	1.57715e-11	1.82255e-11	2.18437e-11
4.8	1.99923e-11	2.30418e-11	2.14796e-11	2.14796e-11	2.71255e-11	2.20526e-11	2.56067e-11	2.39235e-11	2.2221e-11	3.36958e-11	2.04177e-11	1.5602e-11	3.05982e-11	2.44059e-11	2.946e-11	2.23787e-11	1.92246e-11	2.05159e-11	1.62337e-11	2.76887e-11	2.27509e-11	1.91957e-11	1.99153e-11	2.40338e-11	2.17852e-11	1.78925e-11	1.5761e-11	1.82299e-11	2.1853e-11
4.82	1.9992e-11	2.30466e-11	2.14753e-11	2.14753e-11	2.71265e-11	2.20497e-11	2.56054e-11	2.39196e-11	2.22284e-11	3.37057e-11	2.04125e-11	1.56019e-11	3.0601e-11	2.44069e-11	2.94513e-11	2.238e-11	1.92231e-11	2.05221e-11	1.62148e-11	2.76501e-11	2.27555e-11	1.91962e-11	1.99162e-11	2.40366e-11	2.17902e-11	1.78799e-11	1.57655e-11	1.82274e-11	2.18556e-11
4.84	1.99938e-11	2.30458e-11	2.1472e-11	2.1472e-11	2.71213e-11	2.20493e-11	2.56039e-11	2.39208e-11	2.22228e-11	3.36938e-11	2.04112e-11	1.55958e-11	3.06031e-11	2.44104e-11	2.94485e-11	2.23767e-11	1.92227e-11	2.05168e-11	1.62211e-11	2.76951e-11	2.27526e-11	1.9195e-11	1.99159e-11	2.40372e-11	2.17981e-11	1.78944e-11	1.57684e-11	1.82293e-11	2.18527e-11
4.86	1.99886e-11	2.30486e-11	2.14756e-11	2.14756e-11	2.71259e-11	2.20484e-11	2.56038e-11	2.39213e-11	2.22264e-11	3.36982e-11	2.04101e-11	1.55965e-11	3.06046e-11	2.44067e-11	2.94516e-11	2.23771e-11	1.9223e-11	2.05191e-11	1.62197e-11	2.76774e-11	2.27538e-11	1.9197e-11	1.99221e-11	2.4036e-11	2.17853e-11	1.7903e-11	1.5763e-11	1.82327e-11	2.18502e-11
4.88	1.99883e-11	2.30404e-11	2.1475e-11	2.1475e-11	2.7121e-11	2.20486e-11	2.56028e-11	2.39165e-11	2.22224e-11	3.36884e-11	2.04147e-11	1.55964e-11	3.05999e-11	2.44107e-11	2.94542e-11	2.23804e-11	1.92275e-11	2.05146e-11	1.62244e-11	2.76773e-11	2.27466e-11	1.92009e-11	1.99224e-11	2.40408e-11	2.17835e-11	1.78881e-11	1.57561e-11	1.82308e-11	2.18512e-11
4.9	1.99909e-11	2.30435e-11	2.1472e-11	2.1472e-11	2.71249e-11	2.20483e-11	2.56012e-11	2.39166e-11	2.222e-11	3.36861e-11	2.04124e-11	1.55897e-11	3.06011e-11	2.44077e-11	2.94545e-11	2.23747e-11	1.9231e-11	2.0504e-11	1.62201e-11	2.77226e-11	2.27546e-11	1.91991e-11	1.99199e-11	2.40363e-11	2.17875e-11	1.7891e-11	1.57714e-11	1.82251e-11	2.185e-11
4.92	1.99962e-11	2.30475e-11	2.147e-11	2.147e-11	2.71208e-11	2.20513e-11	2.56e-11	2.39285e-11	2.22231e-11	3.36805e-11	2.04125e-11	1.55823e-11	3.05993e-11	2.44075e-11	2.94535e-11	2.23752e-11	1.92262e-11	2.05062e-11	1.6221e-11	2.76954e-11	2.27496e-11	1.92006e-11	1.99161e-11	2.40391e-11	2.17807e-11	1.78828e-11	1.57742e-11	1.82287e-11	2.18429e-11
4.94	1.99943e-11	2.30429e-11	2.14728e-11	2.14728e-11	2.71246e-11	2.20471e-11	2.56068e-11	2.39148e-11	2.22239e-11	3.37012e-11	2.04175e-11	1.55874e-11	3.06047e-11	2.44145e-11	2.94567e-11	2.23806e-11	1.9223e-11	2.05122e-11	1.62164e-11	2.76922e-11	2.27525e-11	1.9195e-11	1.9921e-11	2.40399e-11	2.17902e-11	1.78939e-11	1.57697e-11	1.82273e-11	2.18533e-11
4.96	1.99891e-11	2.30434e-11	2.14794e-11	2.14794e-11	2.71249e-11	2.20506e-11	2.56059e-11	2.39194e-11	2.22241e-11	3.36831e-11	2.04103e-11	1.55801e-11	3.06019e-11	2.44123e-11	2.94543e-11	2.23779e-11	1.92271e-11	2.05079e-11	1.62215e-11	2.77106e-11	2.27494e-11	1.91986e-11	1.99213e-11	2.40387e-11	2.17944e-11	1.78875e-11	1.57651e-11	1.82314e-11	2.18481e-11
4.98	1.99909e-11	2.30483e-11	2.1475e-11	2.1475e-11	2.71249e-11	2.20349e-11	2.56082e-11	2.39211e-11	2.22229e-11	3.36826e-11	2.04109e-11	1.55772e-11	3.06034e-11	2.44028e-11	2.94587e-11	2.23817e-11	1.92295e-11	2.05099e-11	1.6209e-11	2.76715e-11	2.2743e-11	1.9199e-11	1.99157e-11	2.40371e-11	2.17896e-11	1.78842e-11	1.57629e-11	1.82304e-11	2.18516e-11
5	1.999e-11	2.30406e-11	2.14788e-11	2.14788e-11	2.71234e-11	2.20471e-11	2.56065e-11	2.39151e-11	2.22247e-11	3.36897e-11	2.04095e-11	1.55834e-11	3.06018e-11	2.44091e-11	2.94614e-11	2.23757e-11	1.92225e-11	2.05175e-11	1.62204e-11	2.76825e-11	2.27543e-11	1.91976e-11	1.99113e-11	2.40421e-11	2.17915e-11	1.78861e-11	1.57592e-11	1.82299e-11	2.18485e-11
5.02	1.99885e-11	2.30415e-11	2.14719e-11	2.14719e-11	2.71206e-11	2.20446e-11	2.56032e-11	2.39216e-11	2.22196e-11	3.36838e-11	2.04063e-11	1.55845e-11	3.06032e-11	2.44064e-11	2.94557e-11	2.23775e-11	1.92221e-11	2.05159e-11	1.62128e-11	2.7681e-11	2.27533e-11	1.91949e-11	1.99175e-11	2.40328e-11	2.17937e-11	1.7887e-11	1.57723e-11	1.82279e-11	2.18362e-11
5.04	1.99956e-11	2.30459e-11	2.14772e-11	2.14772e-11	2.71261e-11	2.20472e-11	2.5609e-11	2.39217e-11	2.22213e-11	3.36946e-11	2.04117e-11	1.55793e-11	3.06063e-11	2.44106e-11	2.946e-11	2.23746e-11	1.9225e-11	2.05188e-11	1.62215e-11	2.77202e-11	2.27446e-11	1.91979e-11	1.99194e-11	2.40384e-11	2.17962e-11	1.78935e-11	1.57691e-11	1.82308e-11	2.18436e-11
5.06	1.9981e-11	2.30421e-11	2.14774e-11	2.14774e-11	2.71203e-11	2.20401e-11	2.56056e-11	2.39221e-11	2.22169e-11	3.36983e-11	2.0408e-11	1.55802e-11	3.05971e-11	2.44079e-11	2.94602e-11	2.23733e-11	1.92219e-11	2.05214e-11	1.62252e-11	2.77148e-11	2.27549e-11	1.91986e-11	1.99225e-11	2.40425e-11	2.17926e-11	1.79006e-11	1.57563e-11	1.82299e-11	2.18489e-11
5.08	1.99973e-11	2.30384e-11	2.14732e-11	2.14732e-11	2.71307e-11	2.20409e-11	2.56015e-11	2.3915e-11	2.22188e-11	3.36949e-11	2.04109e-11	1.55805e-11	3.06033e-11	2.44082e-11	2.94582e-11	2.23769e-11	1.92266e-11	2.05198e-11	1.62215e-11	2.76816e-11	2.27479e-11	1.92005e-11	1.99157e-11	2.40341e-11	2.17964e-11	1.78935e-11	1.57682e-11	1.82328e-11	2.18477e-11
5.1	1.99905e-11	2.30479e-11	2.14784e-11	2.14784e-11	2.71239e-11	2.20404e-11	2.56044e-11	2.39222e-11	2.22189e-11	3.3688e-11	2.04091e-11	1.55793e-11	3.06029e-11	2.44036e-11	2.94577e-11	2.23825e-11	1.92248e-11	2.05168e-11	1.6214e-11	2.77065e-11	2.2759e-11	1.91957e-11	1.99163e-11	2.40339e-11	2.17946e-11	1.78836e-11	1.57637e-11	1.82275e-11	2.18477e-11
5.12	1.9994e-11	2.30442e-11	2.1479e-11	2.1479e-11	2.71263e-11	2.20346e-11	2.56095e-11	2.39178e-11	2.22239e-11	3.36709e-11	2.04143e-11	1.55766e-11	3.06026e-11	2.44054e-11	2.94585e-11	2.23781e-11	1.9228e-11	2.05144e-11	1.62131e-11	2.7713e-11	2.27468e-11	1.91969e-11	1.99216e-11	2.40373e-11	2.17907e-11	1.78783e-11	1.57717e-11	1.82259e-11	2.18515e-11
5.14	1.99894e-11	2.30502e-11	2.14802e-11	2.14802e-11	2.71261e-11	2.20292e-11	2.56075e-11	2.39167e-11	2.22226e-11	3.36891e-11	2.04045e-11	1.55738e-11	3.06005e-11	2.44021e-11	2.94541e-11	2.23757e-11	1.92273e-11	2.05247e-11	1.62136e-11	2.77061e-11	2.27522e-11	1.91996e-11	1.9918e-11	2.40403e-11	2.17908e-11	1.78719e-11	1.57673e-11	1.82306e-11	2.18386e-11
5.16	1.99911e-11	2.30443e-11	2.14739e-11	2.14739e-11	2.71213e-11	2.20337e-11	2.5605e-11	2.39161e-11	2.22227e-11	3.36903e-11	2.04122e-11	1.55799e-11	3.06082e-11	2.44093e-11	2.94622e-11	2.23746e-11	1.92245e-11	2.05199e-11	1.62193e-11	2.77069e-11	2.27527e-11	1.91999e-11	1.99183e-11	2.40355e-11	2.1788e-11	1.78836e-11	1.57679e-11	1.82273e-11	2.18454e-11
5.18	1.99862e-11	2.30463e-11	2.14732e-11	2.14732e-11	2.71179e-11	2.20317e-11	2.56042e-11	2.39263e-11	2.22248e-11	3.36685e-11	2.04141e-11	1.5578e-11	3.06062e-11	2.44077e-11	2.94507e-11	2.23772e-11	1.92236e-11	2.05248e-11	1.623e-11	2.76937e-11	2.27466e-11	1.91927e-11	1.99204e-11	2.40392e-11	2.17935e-11	1.7896e-11	1.57746e-11	1.82289e-11	2.18512e-11
5.2	1.99922e-11	2.30427e-11	2.14766e-11	2.14766e-11	2.71233e-11	2.20257e-11	2.56071e-11	2.39189e-11	2.22196e-11	3.36871e-11	2.04046e-11	1.55706e-11	3.06033e-11	2.44067e-11	2.94563e-11	2.23777e-11	1.92224e-11	2.05181e-11	1.62137e-11	2.76681e-11	2.27525e-11	1.91998e-11	1.99173e-11	2.40355e-11	2.17864e-11	1.78808e-11	1.57701e-11	1.82355e-11	2.18489e-11
5.22	1.99924e-11	2.30365e-11	2.14776e-11	2.14776e-11	2.71247e-11	2.20329e-11	2.56069e-11	2.39197e-11	2.22203e-11	3.36958e-11	2.04048e-11	1.55724e-11	3.06008e-11	2.44129e-11	2.94518e-11	2.23771e-11	1.92256e-11	2.05258e-11	1.6217e-11	2.76992e-11	2.275e-11	1.91979e-11	1.99219e-11	2.40396e-11	2.17871e-11	1.788e-11	1.57706e-11	1.82307e-11	2.18513e-11
5.24	1.9996e-11	2.30394e-11	2.14751e-11	2.14751e-11	2.71282e-11	2.20318e-11	2.56054e-11	2.39136e-11	2.22225e-11	3.3679e-11	2.04049e-11	1.55707e-11	3.06051e-11	2.44085e-11	2.94531e-11	2.23825e-11	1.92216e-11	2.05246e-11	1.62125e-11	2.77206e-11	2.27467e-11	1.91931e-11	1.99184e-11	2.40341e-11	2.17889e-11	1.78859e-11	1.57695e-11	1.82298e-11	2.18413e-11
5.26	1.99938e-11	2.30434e-11	2.14795e-11	2.14795e-11	2.71168e-11	2.20283e-11	2.56073e-11	2.39258e-11	2.22236e-11	3.36788e-11	2.04081e-11	1.55767e-11	3.06006e-11	2.44052e-11	2.94528e-11	2.23822e-11	1.92191e-11	2.05256e-11	1.62141e-11	2.76947e-11	2.27555e-11	1.91944e-11	1.99214e-11	2.40361e-11	2.17794e-11	1.79012e-11	1.57599e-11	1.82305e-11	2.18397e-11
5.28	1.99975e-11	2.30504e-11	2.14811e-11	2.14811e-11	2.71328e-11	2.2033e-11	2.56079e-11	2.39223e-11	2.22187e-11	3.36721e-11	2.04076e-11	1.55745e-11	3.05997e-11	2.44078e-11	2.94549e-11	2.23801e-11	1.9229e-11	2.05282e-11	1.62177e-11	2.772e-11	2.27486e-11	1.91963e-11	1.99229e-11	2.4038e-11	2.17898e-11	1.78971e-11	1.57775e-11	1.8223e-11	2.18564e-11
5.3	1.99918e-11	2.30515e-11	2.14801e-11	2.14801e-11	2.7121e-11	2.20226e-11	2.5605e-11	2.39214e-11	2.22237e-11	3.37002e-11	2.04104e-11	1.55749e-11	3.06072e-11	2.44084e-11	2.94568e-11	2.23776e-11	1.92212e-11	2.05211e-11	1.62348e-11	2.76827e-11	2.27519e-11	1.91979e-11	1.99246e-11	2.40344e-11	2.17893e-11	1.78936e-11	1.57659e-11	1.82307e-11	2.18446e-11
5.32	1.99962e-11	2.30445e-11	2.14735e-11	2.14735e-11	2.71257e-11	2.20311e-11	2.56094e-11	2.39177e-11	2.22226e-11	3.36983e-11	2.04049e-11	1.5577e-11	3.0599e-11	2.44068e-11	2.94563e-11	2.2375e-11	1.92241e-11	2.05218e-11	1.62253e-11	2.77008e-11	2.27537e-11	1.91992e-11	1.9923e-11	2.40348e-11	2.17904e-11	1.79005e-11	1.57718e-11	1.82309e-11	2.18581e-11
5.34	1.99992e-11	2.30394e-11	2.14811e-11	2.14811e-11	2.71249e-11	2.20259e-11	2.56055e-11	2.39207e-11	2.22254e-11	3.36853e-11	2.04092e-11	1.55757e-11	3.06015e-11	2.44034e-11	2.94595e-11	2.2382e-11	1.92224e-11	2.05213e-11	1.62124e-11	2.76948e-11	2.27515e-11	1.91919e-11	1.99241e-11	2.40355e-11	2.17983e-11	1.7894e-11	1.57818e-11	1.82292e-11	2.18448e-11
5.36	1.99908e-11	2.30454e-11	2.14727e-11	2.14727e-11	2.71261e-11	2.20268e-11	2.56085e-11	2.3922e-11	2.22261e-11	3.36777e-11	2.04063e-11	1.5575e-11	3.06025e-11	2.44089e-11	2.94525e-11	2.2382e-11	1.92249e-11	2.05348e-11	1.62136e-11	2.77044e-11	2.27513e-11	1.91946e-11	1.99209e-11	2.40401e-11	2.17866e-11	1.78966e-11	1.57738e-11	1.82269e-11	2.18522e-11
5.38	1.999e-11	2.30415e-11	2.14718e-11	2.14718e-11	2.71218e-11	2.20291e-11	2.56061e-11	2.3919e-11	2.22316e-11	3.36855e-11	2.04122e-11	1.55782e-11	3.05969e-11	2.44038e-11	2.94596e-11	2.23784e-11	1.92273e-11	2.05314e-11	1.62256e-11	2.76923e-11	2.27514e-11	1.91957e-11	1.99188e-11	2.40363e-11	2.17816e-11	1.78966e-11	1.57755e-11	1.82275e-11	2.18436e-11
5.4	1.99945e-11	2.30463e-11	2.1476e-11	2.1476e-11	2.7126e-11	2.2029e-11	2.56083e-11	2.39211e-11	2.22272e-11	3.3698e-11	2.0408e-11	1.55772e-11	3.06023e-11	2.44158e-11	2.946e-11	2.23754e-11	1.92211e-11	2.05249e-11	1.62265e-11	2.77024e-11	2.27515e-11	1.91968e-11	1.99239e-11	2.40384e-11	2.17935e-11	1.7897e-11	1.57533e-11	1.82297e-11	2.18504e-11
5.42	1.99977e-11	2.30467e-11	2.14787e-11	2.14787e-11	2.71261e-11	2.20325e-11	2.56098e-11	2.39232e-11	2.22258e-11	3.36894e-11	2.04159e-11	1.55709e-11	3.06076e-11	2.44111e-11	2.94547e-11	2.23809e-11	1.92284e-11	2.05322e-11	1.62217e-11	2.76731e-11	2.27561e-11	1.91974e-11	1.99227e-11	2.40365e-11	2.17878e-11	1.7894e-11	1.57721e-11	1.82304e-11	2.18496e-11
5.44	1.9994e-11	2.30457e-11	2.14746e-11	2.14746e-11	2.71242e-11	2.20221e-11	2.56138e-11	2.39189e-11	2.22286e-11	3.36909e-11	2.04141e-11	1.55736e-11	3.06033e-11	2.44094e-11	2.94643e-11	2.23793e-11	1.92232e-11	2.05381e-11	1.62162e-11	2.77082e-11	2.27577e-11	1.92003e-11	1.99185e-11	2.4037e-11	2.1787e-11	1.79039e-11	1.57701e-11	1.82315e-11	2.18494e-11
5.46	1.9996e-11	2.30419e-11	2.14772e-11	2.14772e-11	2.71224e-11	2.20243e-11	2.56128e-11	2.39236e-11	2.22282e-11	3.36868e-11	2.04178e-11	1.55769e-11	3.06058e-11	2.44076e-11	2.94611e-11	2.23742e-11	1.92252e-11	2.05253e-11	1.62076e-11	2.76974e-11	2.27558e-11	1.91928e-11	1.99238e-11	2.40347e-11	2.17878e-11	1.78974e-11	1.57516e-11	1.82319e-11	2.1856e-11
5.48	1.99888e-11	2.30492e-11	2.14788e-11	2.14788e-11	2.71214e-11	2.20217e-11	2.56128e-11	2.39227e-11	2.22267e-11	3.36844e-11	2.04124e-11	1.55733e-11	3.06067e-11	2.44092e-11	2.94548e-11	2.23719e-11	1.92241e-11	2.05212e-11	1.62244e-11	2.77287e-11	2.27462e-11	1.91951e-11	1.99193e-11	2.4038e-11	2.1785e-11	1.78927e-11	1.57718e-11	1.823e-11	2.18571e-11
5.5	2.0001e-11	2.30465e-11	2.14833e-11	2.14833e-11	2.71211e-11	2.20208e-11	2.56114e-11	2.39234e-11	2.22278e-11	3.36868e-11	2.04051e-11	1.55751e-11	3.06057e-11	2.44063e-11	2.94581e-11	2.23822e-11	1.92244e-11	2.05239e-11	1.62177e-11	2.76656e-11	2.27513e-11	1.91931e-11	1.99218e-11	2.40378e-11	2.17898e-11	1.78959e-11	1.57793e-11	1.8233e-11	2.18526e-11
5.52	1.99972e-11	2.30508e-11	2.14795e-11	2.14795e-11	2.7126e-11	2.20248e-11	2.56044e-11	2.39145e-11	2.22284e-11	3.36992e-11	2.04102e-11	1.5575e-11	3.06049e-11	2.44071e-11	2.94648e-11	2.23771e-11	1.9231e-11	2.05276e-11	1.62164e-11	2.7704e-11	2.2758e-11	1.92014e-11	1.99215e-11	2.40302e-11	2.17855e-11	1.78974e-11	1.57724e-11	1.82324e-11	2.18573e-11
5.54	1.99972e-11	2.30409e-11	2.14756e-11	2.14756e-11	2.71264e-11	2.20281e-11	2.56088e-11	2.39203e-11	2.22288e-11	3.36951e-11	2.04098e-11	1.55729e-11	3.06066e-11	2.44155e-11	2.94572e-11	2.23778e-11	1.9225e-11	2.05275e-11	1.62149e-11	2.76983e-11	2.2754e-11	1.9204e-11	1.99201e-11	2.40368e-11	2.17868e-11	1.78957e-11	1.57688e-11	1.82329e-11	2.1851e-11
5.56	1.99917e-11	2.30477e-11	2.14801e-11	2.14801e-11	2.71272e-11	2.20196e-11	2.5608e-11	2.39212e-11	2.22278e-11	3.368e-11	2.04128e-11	1.55694e-11	3.0604e-11	2.44124e-11	2.94616e-11	2.23761e-11	1.92267e-11	2.05325e-11	1.62138e-11	2.76864e-11	2.27518e-11	1.91991e-11	1.99236e-11	2.40356e-11	2.17919e-11	1.78884e-11	1.57685e-11	1.82248e-11	2.18466e-11
5.58	1.99987e-11	2.30428e-11	2.14779e-11	2.14779e-11	2.713e-11	2.20297e-11	2.56064e-11	2.39197e-11	2.22243e-11	3.36867e-11	2.0413e-11	1.55723e-11	3.06057e-11	2.44112e-11	2.94577e-11	2.2384e-11	1.92256e-11	2.05285e-11	1.62086e-11	2.76877e-11	2.2751e-11	1.91924e-11	1.99213e-11	2.40363e-11	2.17883e-11	1.78902e-11	1.57663e-11	1.82289e-11	2.18541e-11
5.6	1.99942e-11	2.30462e-11	2.14835e-11	2.14835e-11	2.71214e-11	2.20241e-11	2.56061e-11	2.39181e-11	2.2229e-11	3.36989e-11	2.04111e-11	1.55679e-11	3.0605e-11	2.44105e-11	2.94563e-11	2.23781e-11	1.92268e-11	2.05246e-11	1.6219e-11	2.77032e-11	2.27463e-11	1.92001e-11	1.9925e-11	2.40332e-11	2.17891e-11	1.78902e-11	1.57732e-11	1.82395e-11	2.1852e-11
5.62	2.00003e-11	2.30478e-11	2.14752e-11	2.14752e-11	2.71239e-11	2.20173e-11	2.56092e-11	2.3918e-11	2.22285e-11	3.3681e-11	2.04086e-11	1.55716e-11	3.06067e-11	2.44058e-11	2.94605e-11	2.23815e-11	1.92261e-11	2.05248e-11	1.62127e-11	2.768e-11	2.27478e-11	1.91984e-11	1.99216e-11	2.40377e-11	2.17889e-11	1.78836e-11	1.57778e-11	1.82252e-11	2.18499e-11
5.64	1.99932e-11	2.30463e-11	2.14786e-11	2.14786e-11	2.71246e-11	2.20176e-11	2.5609e-11	2.39197e-11	2.22305e-11	3.36828e-11	2.04156e-11	1.55724e-11	3.06077e-11	2.44075e-11	2.94536e-11	2.23865e-11	1.9225e-11	2.05315e-11	1.62146e-11	2.77143e-11	2.27503e-11	1.9203e-11	1.99223e-11	2.40307e-11	2.17839e-11	1.78824e-11	1.57689e-11	1.82321e-11	2.18544e-11
5.66	2.00017e-11	2.30503e-11	2.14793e-11	2.14793e-11	2.71274e-11	2.20224e-11	2.56082e-11	2.39209e-11	2.22279e-11	3.37004e-11	2.04098e-11	1.55713e-11	3.06062e-11	2.44053e-11	2.94585e-11	2.238e-11	1.92304e-11	2.05229e-11	1.62196e-11	2.77571e-11	2.27512e-11	1.91942e-11	1.99264e-11	2.4037e-11	2.17867e-11	1.78811e-11	1.57676e-11	1.82306e-11	2.18526e-11
5.68	1.99958e-11	2.3047e-11	2.14812e-11	2.14812e-11	2.71266e-11	2.20233e-11	2.56067e-11	2.39156e-11	2.22306e-11	3.36927e-11	2.04158e-11	1.55676e-11	3.06037e-11	2.44042e-11	2.94629e-11	2.23811e-11	1.92208e-11	2.05309e-11	1.62148e-11	2.76972e-11	2.27552e-11	1.91961e-11	1.99234e-11	2.40398e-11	2.17837e-11	1.78806e-11	1.5775e-11	1.82307e-11	2.18569e-11
5.7	1.99923e-11	2.30452e-11	2.14804e-11	2.14804e-11	2.71278e-11	2.20201e-11	2.56059e-11	2.39209e-11	2.22302e-11	3.36888e-11	2.0414e-11	1.55751e-11	3.0607e-11	2.44098e-11	2.94641e-11	2.23838e-11	1.92276e-11	2.05304e-11	1.62148e-11	2.77273e-11	2.27482e-11	1.91973e-11	1.99223e-11	2.4038e-11	2.17894e-11	1.7877e-11	1.57754e-11	1.82297e-11	2.18552e-11
5.72	1.99881e-11	2.30494e-11	2.14772e-11	2.14772e-11	2.71308e-11	2.20185e-11	2.56037e-11	2.39166e-11	2.22296e-11	3.37015e-11	2.04169e-11	1.55706e-11	3.06081e-11	2.44084e-11	2.94565e-11	2.23822e-11	1.92282e-11	2.053e-11	1.62212e-11	2.77073e-11	2.27525e-11	1.91974e-11	1.99231e-11	2.40336e-11	2.179e-11	1.7884e-11	1.57737e-11	1.82323e-11	2.18509e-11
5.74	1.99963e-11	2.30471e-11	2.14747e-11	2.14747e-11	2.71246e-11	2.20216e-11	2.55999e-11	2.39192e-11	2.22252e-11	3.36852e-11	2.04131e-11	1.55741e-11	3.06053e-11	2.44102e-11	2.94602e-11	2.23761e-11	1.92238e-11	2.0529e-11	1.62155e-11	2.77457e-11	2.27558e-11	1.91941e-11	1.99259e-11	2.40383e-11	2.1788e-11	1.78739e-11	1.57639e-11	1.82281e-11	2.18561e-11
5.76	1.99942e-11	2.3049e-11	2.14822e-11	2.14822e-11	2.71195e-11	2.20175e-11	2.56079e-11	2.3918e-11	2.22273e-11	3.36928e-11	2.04159e-11	1.55772e-11	3.06072e-11	2.44143e-11	2.94595e-11	2.23789e-11	1.9227e-11	2.05317e-11	1.62164e-11	2.77091e-11	2.27553e-11	1.91965e-11	1.99237e-11	2.40367e-11	2.17916e-11	1.78751e-11	1.57613e-11	1.82298e-11	2.18566e-11
5.78	1.99873e-11	2.30461e-11	2.14804e-11	2.14804e-11	2.71237e-11	2.20291e-11	2.5605e-11	2.39163e-11	2.22266e-11	3.36825e-11	2.04116e-11	1.55751e-11	3.05993e-11	2.44109e-11	2.94678e-11	2.23811e-11	1.92253e-11	2.05266e-11	1.62233e-11	2.77329e-11	2.2746e-11	1.92025e-11	1.99232e-11	2.4037e-11	2.17945e-11	1.78807e-11	1.57684e-11	1.82265e-11	2.18575e-11
5.8	1.99953e-11	2.30488e-11	2.14784e-11	2.14784e-11	2.7128e-11	2.20206e-11	2.56081e-11	2.39225e-11	2.22295e-11	3.3693e-11	2.04103e-11	1.55783e-11	3.06087e-11	2.44066e-11	2.94613e-11	2.23839e-11	1.92247e-11	2.05243e-11	1.62273e-11	2.77346e-11	2.27565e-11	1.91969e-11	1.99287e-11	2.40364e-11	2.17908e-11	1.78812e-11	1.57762e-11	1.82295e-11	2.1856e-11
5.82	1.9997e-11	2.30417e-11	2.14811e-11	2.14811e-11	2.71233e-11	2.20262e-11	2.5606e-11	2.39185e-11	2.22241e-11	3.36939e-11	2.04122e-11	1.55758e-11	3.0603e-11	2.44113e-11	2.94548e-11	2.23765e-11	1.92264e-11	2.05217e-11	1.62173e-11	2.77373e-11	2.27492e-11	1.91981e-11	1.99231e-11	2.40371e-11	2.17862e-11	1.78815e-11	1.57648e-11	1.82337e-11	2.18556e-11
5.84	1.99927e-11	2.30493e-11	2.14805e-11	2.14805e-11	2.71257e-11	2.20279e-11	2.56073e-11	2.39178e-11	2.22234e-11	3.36808e-11	2.04101e-11	1.55751e-11	3.06085e-11	2.44121e-11	2.94577e-11	2.23811e-11	1.923e-11	2.05284e-11	1.6213e-11	2.77204e-11	2.27524e-11	1.92006e-11	1.99251e-11	2.40416e-11	2.17898e-11	1.78823e-11	1.5759e-11	1.8229e-11	2.1858e-11
5.86	1.99902e-11	2.30451e-11	2.14822e-11	2.14822e-11	2.71246e-11	2.20206e-11	2.56028e-11	2.39197e-11	2.22298e-11	3.36915e-11	2.04084e-11	1.55715e-11	3.06028e-11	2.44106e-11	2.94628e-11	2.23778e-11	1.92263e-11	2.05244e-11	1.62166e-11	2.77211e-11	2.27464e-11	1.91949e-11	1.99186e-11	2.40353e-11	2.17845e-11	1.78718e-11	1.57731e-11	1.8231e-11	2.18514e-11
5.88	1.99898e-11	2.3048e-11	2.14774e-11	2.14774e-11	2.71201e-11	2.20242e-11	2.56016e-11	2.39204e-11	2.22269e-11	3.36937e-11	2.04042e-11	1.5576e-11	3.0604e-11	2.44039e-11	2.9461e-11	2.23795e-11	1.92303e-11	2.05301e-11	1.62199e-11	2.77336e-11	2.27511e-11	1.91957e-11	1.99274e-11	2.40386e-11	2.1787e-11	1.7873e-11	1.57635e-11	1.82265e-11	2.18503e-11
5.9	1.99956e-11	2.30491e-11	2.14835e-11	2.14835e-11	2.71202e-11	2.20226e-11	2.56035e-11	2.39202e-11	2.2229e-11	3.37021e-11	2.04085e-11	1.55685e-11	3.0611e-11	2.44063e-11	2.94645e-11	2.23787e-11	1.92232e-11	2.05232e-11	1.62231e-11	2.77542e-11	2.2758e-11	1.91961e-11	1.99248e-11	2.40361e-11	2.17933e-11	1.78707e-11	1.57691e-11	1.82295e-11	2.18472e-11
5.92	1.99948e-11	2.30472e-11	2.1479e-11	2.1479e-11	2.71211e-11	2.20247e-11	2.56083e-11	2.39193e-11	2.22282e-11	3.36842e-11	2.04134e-11	1.55718e-11	3.06062e-11	2.44065e-11	2.94599e-11	2.23777e-11	1.92294e-11	2.05309e-11	1.62288e-11	2.77317e-11	2.27553e-11	1.91946e-11	1.99234e-11	2.40372e-11	2.17938e-11	1.78645e-11	1.5768e-11	1.82292e-11	2.18557e-11
5.94	1.99887e-11	2.30421e-11	2.1476e-11	2.1476e-11	2.7121e-11	2.20187e-11	2.56046e-11	2.39207e-11	2.22276e-11	3.36806e-11	2.041e-11	1.5574e-11	3.0612e-11	2.44036e-11	2.9459e-11	2.23773e-11	1.92253e-11	2.05301e-11	1.62253e-11	2.76927e-11	2.27471e-11	1.92013e-11	1.99241e-11	2.40437e-11	2.17859e-11	1.78741e-11	1.5765e-11	1.82361e-11	2.18433e-11
5.96	1.99969e-11	2.30472e-11	2.14745e-11	2.14745e-11	2.7128e-11	2.20301e-11	2.56054e-11	2.39227e-11	2.22283e-11	3.36699e-11	2.04068e-11	1.55756e-11	3.0609e-11	2.44068e-11	2.94566e-11	2.23757e-11	1.92281e-11	2.05435e-11	1.62237e-11	2.77227e-11	2.2751e-11	1.91988e-11	1.99246e-11	2.40342e-11	2.1791e-11	1.78749e-11	1.57694e-11	1.82322e-11	2.18615e-11
5.98	1.99953e-11	2.30449e-11	2.14773e-11	2.14773e-11	2.71236e-11	2.20243e-11	2.56116e-11	2.39169e-11	2.22312e-11	3.36802e-11	2.04095e-11	1.55774e-11	3.06091e-11	2.4408e-11	2.94605e-11	2.23772e-11	1.92254e-11	2.05291e-11	1.62271e-11	2.77244e-11	2.27515e-11	1.92024e-11	1.99235e-11	2.40347e-11	2.1787e-11	1.7864e-11	1.57659e-11	1.82298e-11	2.18509e-11
6	1.99871e-11	2.30445e-11	2.14732e-11	2.14732e-11	2.71215e-11	2.20209e-11	2.56084e-11	2.39183e-11	2.22268e-11	3.36856e-11	2.04095e-11	1.55718e-11	3.06109e-11	2.44051e-11	2.94603e-11	2.23744e-11	1.92238e-11	2.05306e-11	1.62215e-11	2.77612e-11	2.27621e-11	1.91975e-11	1.99223e-11	2.40374e-11	2.17945e-11	1.78691e-11	1.57694e-11	1.82307e-11	2.18574e-11
6.02	1.99939e-11	2.30463e-11	2.14792e-11	2.14792e-11	2.71186e-11	2.20216e-11	2.5608e-11	2.39219e-11	2.22273e-11	3.36787e-11	2.04112e-11	1.55708e-11	3.06086e-11	2.44069e-11	2.94649e-11	2.23785e-11	1.92241e-11	2.05331e-11	1.62234e-11	2.77519e-11	2.27551e-11	1.91977e-11	1.9921e-11	2.40346e-11	2.17929e-11	1.78794e-11	1.57751e-11	1.82272e-11	2.18593e-11
6.04	2.00038e-11	2.30435e-11	2.14812e-11	2.14812e-11	2.71281e-11	2.20264e-11	2.56053e-11	2.39223e-11	2.22295e-11	3.36823e-11	2.04083e-11	1.55708e-11	3.06092e-11	2.44091e-11	2.94591e-11	2.23757e-11	1.92307e-11	2.05307e-11	1.6224e-11	2.77312e-11	2.27545e-11	1.92007e-11	1.99266e-11	2.40412e-11	2.17874e-11	1.78789e-11	1.57678e-11	1.82262e-11	2.18608e-11
6.06	1.9995e-11	2.30461e-11	2.14776e-11	2.14776e-11	2.7119e-11	2.20122e-11	2.5609e-11	2.39162e-11	2.22289e-11	3.36853e-11	2.04103e-11	1.55707e-11	3.061e-11	2.44067e-11	2.94582e-11	2.23819e-11	1.92265e-11	2.05249e-11	1.62323e-11	2.77491e-11	2.27491e-11	1.9201e-11	1.99279e-11	2.40347e-11	2.17846e-11	1.78876e-11	1.57812e-11	1.82304e-11	2.18551e-11
6.08	1.99901e-11	2.30499e-11	2.1476e-11	2.1476e-11	2.7124e-11	2.20196e-11	2.56069e-11	2.39166e-11	2.22295e-11	3.36804e-11	2.04099e-11	1.5567e-11	3.06102e-11	2.44057e-11	2.94591e-11	2.23774e-11	1.92217e-11	2.05243e-11	1.62227e-11	2.77494e-11	2.27462e-11	1.91955e-11	1.99271e-11	2.40392e-11	2.17826e-11	1.78775e-11	1.5764e-11	1.82303e-11	2.18619e-11
6.1	1.99974e-11	2.30454e-11	2.14793e-11	2.14793e-11	2.71264e-11	2.20251e-11	2.56086e-11	2.39226e-11	2.22307e-11	3.36966e-11	2.04163e-11	1.5574e-11	3.06117e-11	2.44081e-11	2.94565e-11	2.2376e-11	1.92222e-11	2.05263e-11	1.6219e-11	2.77113e-11	2.27436e-11	1.9198e-11	1.99275e-11	2.40354e-11	2.17831e-11	1.78813e-11	1.578e-11	1.82368e-11	2.18564e-11
6.12	2.00001e-11	2.30438e-11	2.14777e-11	2.14777e-11	2.7122e-11	2.20146e-11	2.56023e-11	2.39301e-11	2.22316e-11	3.3681e-11	2.0409e-11	1.55719e-11	3.06046e-11	2.44081e-11	2.94574e-11	2.23744e-11	1.92275e-11	2.05225e-11	1.62259e-11	2.77282e-11	2.27513e-11	1.91934e-11	1.99253e-11	2.40277e-11	2.17897e-11	1.78653e-11	1.57667e-11	1.82321e-11	2.1852e-11
6.14	1.99932e-11	2.30503e-11	2.1474e-11	2.1474e-11	2.71222e-11	2.20161e-11	2.56112e-11	2.39209e-11	2.22278e-11	3.36891e-11	2.04103e-11	1.55728e-11	3.06119e-11	2.44075e-11	2.94614e-11	2.2378e-11	1.92221e-11	2.05227e-11	1.62244e-11	2.77495e-11	2.27535e-11	1.91944e-11	1.99272e-11	2.40366e-11	2.1785e-11	1.78657e-11	1.57691e-11	1.82333e-11	2.18656e-11
6.16	1.99915e-11	2.30495e-11	2.14794e-11	2.14794e-11	2.7119e-11	2.20191e-11	2.56133e-11	2.39271e-11	2.22317e-11	3.36853e-11	2.04131e-11	1.55742e-11	3.06069e-11	2.44054e-11	2.94577e-11	2.238e-11	1.92205e-11	2.05293e-11	1.62195e-11	2.77049e-11	2.27418e-11	1.91957e-11	1.99287e-11	2.40411e-11	2.1793e-11	1.78709e-11	1.57678e-11	1.82349e-11	2.18566e-11
6.18	1.99935e-11	2.30404e-11	2.14813e-11	2.14813e-11	2.71225e-11	2.20202e-11	2.5612e-11	2.39271e-11	2.22281e-11	3.36819e-11	2.04148e-11	1.55715e-11	3.06056e-11	2.44078e-11	2.94595e-11	2.23783e-11	1.92279e-11	2.0527e-11	1.62304e-11	2.77233e-11	2.27481e-11	1.91957e-11	1.99297e-11	2.4035e-11	2.17904e-11	1.78627e-11	1.57622e-11	1.82328e-11	2.18461e-11
6.2	1.99905e-11	2.30455e-11	2.14754e-11	2.14754e-11	2.7122e-11	2.20113e-11	2.56087e-11	2.39196e-11	2.22304e-11	3.36817e-11	2.04072e-11	1.55682e-11	3.06071e-11	2.44061e-11	2.94599e-11	2.2375e-11	1.92224e-11	2.05304e-11	1.62177e-11	2.77554e-11	2.27448e-11	1.92039e-11	1.99314e-11	2.40421e-11	2.17887e-11	1.78566e-11	1.5769e-11	1.82356e-11	2.18556e-11
6.22	1.99922e-11	2.30463e-11	2.14816e-11	2.14816e-11	2.71197e-11	2.20217e-11	2.56089e-11	2.39227e-11	2.22245e-11	3.36807e-11	2.04119e-11	1.55761e-11	3.06094e-11	2.44059e-11	2.94583e-11	2.23822e-11	1.92264e-11	2.05377e-11	1.62259e-11	2.77572e-11	2.27498e-11	1.91959e-11	1.99267e-11	2.40343e-11	2.17824e-11	1.78703e-11	1.57703e-11	1.82351e-11	2.18512e-11
6.24	1.99881e-11	2.30426e-11	2.14779e-11	2.14779e-11	2.71154e-11	2.20054e-11	2.56075e-11	2.39228e-11	2.22282e-11	3.36664e-11	2.04082e-11	1.55723e-11	3.06064e-11	2.44057e-11	2.94589e-11	2.23824e-11	1.92293e-11	2.05325e-11	1.62285e-11	2.77274e-11	2.27502e-11	1.91971e-11	1.99238e-11	2.40406e-11	2.17915e-11	1.78508e-11	1.57671e-11	1.82336e-11	2.18508e-11
6.26	1.99939e-11	2.3042e-11	2.14789e-11	2.14789e-11	2.71234e-11	2.20141e-11	2.56057e-11	2.39249e-11	2.22289e-11	3.36768e-11	2.041e-11	1.55712e-11	3.06087e-11	2.44103e-11	2.9457e-11	2.23744e-11	1.92245e-11	2.05336e-11	1.62306e-11	2.77603e-11	2.27587e-11	1.91976e-11	1.99223e-11	2.40424e-11	2.17888e-11	1.7859e-11	1.57576e-11	1.82362e-11	2.18542e-11
6.28	1.99944e-11	2.30426e-11	2.1478e-11	2.1478e-11	2.71218e-11	2.20102e-11	2.56102e-11	2.39228e-11	2.22298e-11	3.36744e-11	2.04123e-11	1.55721e-11	3.06029e-11	2.44096e-11	2.94571e-11	2.23822e-11	1.92235e-11	2.05374e-11	1.62251e-11	2.77658e-11	2.2762e-11	1.9195e-11	1.99223e-11	2.40383e-11	2.17903e-11	1.78478e-11	1.57692e-11	1.8228e-11	2.18596e-11
6.3	1.9999e-11	2.30441e-11	2.14812e-11	2.14812e-11	2.71231e-11	2.20132e-11	2.56103e-11	2.39243e-11	2.22315e-11	3.36729e-11	2.04091e-11	1.55705e-11	3.06105e-11	2.44047e-11	2.94577e-11	2.23838e-11	1.9225e-11	2.05386e-11	1.62289e-11	2.77552e-11	2.27577e-11	1.92048e-11	1.99279e-11	2.40364e-11	2.17812e-11	1.78508e-11	1.57658e-11	1.823e-11	2.18601e-11
6.32	1.9992e-11	2.30473e-11	2.14788e-11	2.14788e-11	2.7125e-11	2.20176e-11	2.56106e-11	2.39206e-11	2.22308e-11	3.36733e-11	2.04168e-11	1.55738e-11	3.06091e-11	2.44084e-11	2.94565e-11	2.23795e-11	1.92264e-11	2.05302e-11	1.62265e-11	2.77474e-11	2.27494e-11	1.91929e-11	1.9926e-11	2.404e-11	2.17878e-11	1.78587e-11	1.5769e-11	1.82317e-11	2.18481e-11
6.34	1.99918e-11	2.30391e-11	2.14793e-11	2.14793e-11	2.71208e-11	2.20114e-11	2.56013e-11	2.39252e-11	2.22237e-11	3.36718e-11	2.04099e-11	1.55756e-11	3.06085e-11	2.44058e-11	2.94503e-11	2.23758e-11	1.92293e-11	2.05316e-11	1.62366e-11	2.7733e-11	2.27568e-11	1.92015e-11	1.99297e-11	2.40413e-11	2.17884e-11	1.78588e-11	1.57601e-11	1.82294e-11	2.18496e-11
6.36	1.99973e-11	2.30489e-11	2.148e-11	2.148e-11	2.71239e-11	2.20117e-11	2.56097e-11	2.39237e-11	2.22269e-11	3.36713e-11	2.04098e-11	1.5577e-11	3.0608e-11	2.44057e-11	2.94577e-11	2.23796e-11	1.92325e-11	2.05424e-11	1.62213e-11	2.77482e-11	2.27546e-11	1.92018e-11	1.99275e-11	2.40295e-11	2.179e-11	1.78683e-11	1.57627e-11	1.82302e-11	2.18581e-11
6.38	1.99928e-11	2.30453e-11	2.14846e-11	2.14846e-11	2.71218e-11	2.20146e-11	2.56058e-11	2.39168e-11	2.22309e-11	3.36678e-11	2.0413e-11	1.5574e-11	3.06022e-11	2.44106e-11	2.94552e-11	2.23774e-11	1.92298e-11	2.05371e-11	1.62261e-11	2.77565e-11	2.27512e-11	1.92015e-11	1.9926e-11	2.40395e-11	2.17905e-11	1.78593e-11	1.57758e-11	1.8229e-11	2.18531e-11
6.4	1.9988e-11	2.30442e-11	2.14843e-11	2.14843e-11	2.7126e-11	2.20119e-11	2.56063e-11	2.39196e-11	2.22289e-11	3.36759e-11	2.04096e-11	1.55748e-11	3.06046e-11	2.44052e-11	2.94593e-11	2.23804e-11	1.92217e-11	2.05331e-11	1.62196e-11	2.77491e-11	2.27462e-11	1.9199e-11	1.99308e-11	2.40385e-11	2.17865e-11	1.78546e-11	1.57761e-11	1.82263e-11	2.18567e-11
6.42	1.99922e-11	2.30442e-11	2.14798e-11	2.14798e-11	2.71297e-11	2.20148e-11	2.56053e-11	2.39216e-11	2.22324e-11	3.36568e-11	2.04076e-11	1.55805e-11	3.0604e-11	2.4407e-11	2.9455e-11	2.23815e-11	1.92266e-11	2.05365e-11	1.62237e-11	2.77602e-11	2.2752e-11	1.91979e-11	1.99343e-11	2.40354e-11	2.17863e-11	1.78607e-11	1.57688e-11	1.82299e-11	2.18579e-11
6.44	1.9998e-11	2.30512e-11	2.14778e-11	2.14778e-11	2.71224e-11	2.20224e-11	2.5604e-11	2.39249e-11	2.22254e-11	3.36714e-11	2.04132e-11	1.558e-11	3.06135e-11	2.44019e-11	2.94564e-11	2.23833e-11	1.92298e-11	2.05331e-11	1.62196e-11	2.7762e-11	2.27522e-11	1.91959e-11	1.99275e-11	2.40372e-11	2.17933e-11	1.78564e-11	1.57635e-11	1.82249e-11	2.18568e-11
6.46	1.99947e-11	2.30468e-11	2.14777e-11	2.14777e-11	2.71285e-11	2.20134e-11	2.56018e-11	2.39226e-11	2.22287e-11	3.3666e-11	2.0412e-11	1.55717e-11	3.06078e-11	2.44049e-11	2.94529e-11	2.23847e-11	1.92295e-11	2.05399e-11	1.62187e-11	2.77499e-11	2.27509e-11	1.92026e-11	1.99294e-11	2.40387e-11	2.1782e-11	1.78676e-11	1.57703e-11	1.82304e-11	2.1855e-11
6.48	1.99913e-11	2.30521e-11	2.14775e-11	2.14775e-11	2.71226e-11	2.20116e-11	2.56035e-11	2.39209e-11	2.22277e-11	3.36692e-11	2.04114e-11	1.55699e-11	3.06114e-11	2.44091e-11	2.94576e-11	2.23816e-11	1.92267e-11	2.05407e-11	1.62156e-11	2.77521e-11	2.27397e-11	1.92006e-11	1.99288e-11	2.40389e-11	2.1786e-11	1.78626e-11	1.57716e-11	1.8229e-11	2.18548e-11
6.5	1.99887e-11	2.30417e-11	2.14795e-11	2.14795e-11	2.71256e-11	2.20106e-11	2.56048e-11	2.3921e-11	2.22291e-11	3.36782e-11	2.04129e-11	1.55763e-11	3.0612e-11	2.44085e-11	2.94557e-11	2.23805e-11	1.9225e-11	2.05389e-11	1.62197e-11	2.77469e-11	2.2748e-11	1.92008e-11	1.99256e-11	2.404e-11	2.17876e-11	1.78836e-11	1.57635e-11	1.82268e-11	2.18626e-11
6.52	1.99966e-11	2.3045e-11	2.14797e-11	2.14797e-11	2.71247e-11	2.20146e-11	2.56115e-11	2.39233e-11	2.22274e-11	3.36686e-11	2.04111e-11	1.55724e-11	3.06113e-11	2.44121e-11	2.94593e-11	2.23791e-11	1.92267e-11	2.0533e-11	1.62276e-11	2.77351e-11	2.2749e-11	1.92e-11	1.99286e-11	2.40381e-11	2.17868e-11	1.78657e-11	1.5769e-11	1.82319e-11	2.18582e-11
6.54	1.99954e-11	2.30466e-11	2.14877e-11	2.14877e-11	2.71239e-11	2.20174e-11	2.56018e-11	2.39206e-11	2.22278e-11	3.36666e-11	2.04104e-11	1.55742e-11	3.0613e-11	2.44119e-11	2.94563e-11	2.23824e-11	1.92275e-11	2.05394e-11	1.62253e-11	2.77546e-11	2.27542e-11	1.92021e-11	1.99323e-11	2.40409e-11	2.1787e-11	1.78721e-11	1.57677e-11	1.82263e-11	2.18605e-11
6.56	1.99889e-11	2.3046e-11	2.14746e-11	2.14746e-11	2.71261e-11	2.20114e-11	2.56098e-11	2.39236e-11	2.22292e-11	3.36781e-11	2.0411e-11	1.55719e-11	3.06121e-11	2.44109e-11	2.94552e-11	2.2381e-11	1.92272e-11	2.05477e-11	1.62274e-11	2.77728e-11	2.27538e-11	1.9199e-11	1.99318e-11	2.40352e-11	2.17847e-11	1.78659e-11	1.57707e-11	1.82325e-11	2.18545e-11
6.58	1.99952e-11	2.305e-11	2.14825e-11	2.14825e-11	2.71218e-11	2.20096e-11	2.56094e-11	2.39234e-11	2.2228e-11	3.36807e-11	2.04146e-11	1.55715e-11	3.0611e-11	2.44084e-11	2.94548e-11	2.23785e-11	1.92279e-11	2.05451e-11	1.62314e-11	2.7758e-11	2.27462e-11	1.91984e-11	1.99281e-11	2.40322e-11	2.17866e-11	1.7868e-11	1.57701e-11	1.82336e-11	2.18497e-11
6.6	1.99949e-11	2.30444e-11	2.1483e-11	2.1483e-11	2.71278e-11	2.20087e-11	2.56056e-11	2.39244e-11	2.22287e-11	3.36678e-11	2.04195e-11	1.55745e-11	3.06086e-11	2.44087e-11	2.94537e-11	2.23856e-11	1.92254e-11	2.05415e-11	1.62286e-11	2.77744e-11	2.27501e-11	1.91976e-11	1.99254e-11	2.40396e-11	2.17918e-11	1.78587e-11	1.57648e-11	1.82327e-11	2.18514e-11
6.62	1.9992e-11	2.30374e-11	2.14855e-11	2.14855e-11	2.71206e-11	2.2016e-11	2.56105e-11	2.39271e-11	2.22311e-11	3.36626e-11	2.04144e-11	1.55759e-11	3.06064e-11	2.44078e-11	2.94568e-11	2.23774e-11	1.92235e-11	2.05377e-11	1.62321e-11	2.77677e-11	2.27503e-11	1.91937e-11	1.99224e-11	2.40422e-11	2.17881e-11	1.78726e-11	1.57671e-11	1.82373e-11	2.18602e-11
6.64	1.99917e-11	2.30458e-11	2.14752e-11	2.14752e-11	2.71289e-11	2.20143e-11	2.56084e-11	2.39223e-11	2.22287e-11	3.3671e-11	2.0413e-11	1.55709e-11	3.06022e-11	2.44028e-11	2.94602e-11	2.23813e-11	1.9224e-11	2.05451e-11	1.62399e-11	2.77496e-11	2.27489e-11	1.91998e-11	1.99206e-11	2.40341e-11	2.1784e-11	1.78825e-11	1.57625e-11	1.82391e-11	2.1854e-11
6.66	1.99932e-11	2.30482e-11	2.14851e-11	2.14851e-11	2.71255e-11	2.20145e-11	2.56056e-11	2.39256e-11	2.2232e-11	3.36587e-11	2.04135e-11	1.55689e-11	3.0607e-11	2.4409e-11	2.94572e-11	2.23847e-11	1.92323e-11	2.05433e-11	1.62367e-11	2.7783e-11	2.27537e-11	1.92008e-11	1.99222e-11	2.40422e-11	2.17888e-11	1.78728e-11	1.57665e-11	1.82355e-11	2.18565e-11
6.68	1.99928e-11	2.3042e-11	2.14764e-11	2.14764e-11	2.71239e-11	2.20024e-11	2.5605e-11	2.39239e-11	2.22327e-11	3.36711e-11	2.04124e-11	1.55731e-11	3.06106e-11	2.44028e-11	2.94606e-11	2.23812e-11	1.92284e-11	2.05448e-11	1.62402e-11	2.7784e-11	2.27515e-11	1.91989e-11	1.99254e-11	2.4038e-11	2.17866e-11	1.78757e-11	1.57749e-11	1.82314e-11	2.18607e-11
6.7	1.99862e-11	2.30429e-11	2.14799e-11	2.14799e-11	2.71168e-11	2.20105e-11	2.56044e-11	2.3928e-11	2.22328e-11	3.36525e-11	2.04109e-11	1.55743e-11	3.0616e-11	2.44089e-11	2.94582e-11	2.23867e-11	1.92305e-11	2.05438e-11	1.62337e-11	2.77682e-11	2.27487e-11	1.92009e-11	1.99296e-11	2.40405e-11	2.1788e-11	1.78701e-11	1.57668e-11	1.82361e-11	2.18507e-11
6.72	1.999e-11	2.30476e-11	2.14784e-11	2.14784e-11	2.71239e-11	2.20091e-11	2.56022e-11	2.39286e-11	2.22325e-11	3.36756e-11	2.04126e-11	1.55699e-11	3.06092e-11	2.44137e-11	2.94592e-11	2.23868e-11	1.92285e-11	2.05408e-11	1.62355e-11	2.7776e-11	2.27454e-11	1.91984e-11	1.99278e-11	2.40387e-11	2.17842e-11	1.78845e-11	1.5771e-11	1.82276e-11	2.18555e-11
6.74	1.99944e-11	2.30474e-11	2.14844e-11	2.14844e-11	2.71299e-11	2.2011e-11	2.56071e-11	2.3924e-11	2.22293e-11	3.36538e-11	2.04154e-11	1.55699e-11	3.06091e-11	2.44078e-11	2.94576e-11	2.23798e-11	1.92259e-11	2.0545e-11	1.62365e-11	2.778e-11	2.27489e-11	1.92035e-11	1.99321e-11	2.40382e-11	2.17983e-11	1.78734e-11	1.57681e-11	1.82321e-11	2.18546e-11
6.76	2.00005e-11	2.30451e-11	2.14782e-11	2.14782e-11	2.71234e-11	2.20083e-11	2.56055e-11	2.39231e-11	2.22259e-11	3.36627e-11	2.04125e-11	1.55726e-11	3.06093e-11	2.44148e-11	2.94616e-11	2.23846e-11	1.92251e-11	2.05452e-11	1.62342e-11	2.77832e-11	2.27426e-11	1.91925e-11	1.9935e-11	2.40413e-11	2.17932e-11	1.78661e-11	1.57693e-11	1.8236e-11	2.18561e-11
6.78	1.99959e-11	2.30411e-11	2.14833e-11	2.14833e-11	2.71197e-11	2.20097e-11	2.56014e-11	2.3925e-11	2.22334e-11	3.36646e-11	2.04184e-11	1.55763e-11	3.06105e-11	2.44132e-11	2.94597e-11	2.23826e-11	1.92265e-11	2.05498e-11	1.6226e-11	2.77776e-11	2.27396e-11	1.91972e-11	1.99318e-11	2.40388e-11	2.17947e-11	1.78574e-11	1.57686e-11	1.82273e-11	2.18524e-11
6.8	1.99979e-11	2.30482e-11	2.14825e-11	2.14825e-11	2.71248e-11	2.20086e-11	2.56057e-11	2.39224e-11	2.2233e-11	3.36671e-11	2.04145e-11	1.55778e-11	3.06153e-11	2.44076e-11	2.94606e-11	2.2383e-11	1.92274e-11	2.05413e-11	1.623e-11	2.77749e-11	2.27538e-11	1.9201e-11	1.9933e-11	2.4034e-11	2.1793e-11	1.78715e-11	1.57673e-11	1.82323e-11	2.18562e-11
6.82	1.999e-11	2.30421e-11	2.14838e-11	2.14838e-11	2.7122e-11	2.20145e-11	2.56049e-11	2.39198e-11	2.22298e-11	3.36669e-11	2.04128e-11	1.5572e-11	3.06077e-11	2.44115e-11	2.94624e-11	2.23847e-11	1.92269e-11	2.05512e-11	1.62341e-11	2.77708e-11	2.27491e-11	1.91992e-11	1.99278e-11	2.40393e-11	2.17854e-11	1.78759e-11	1.57604e-11	1.8237e-11	2.18526e-11
6.84	1.99908e-11	2.3045e-11	2.14751e-11	2.14751e-11	2.71256e-11	2.20177e-11	2.56044e-11	2.39259e-11	2.22314e-11	3.36571e-11	2.04143e-11	1.55732e-11	3.06157e-11	2.44074e-11	2.94629e-11	2.2386e-11	1.92276e-11	2.05448e-11	1.62333e-11	2.77906e-11	2.27429e-11	1.91987e-11	1.99322e-11	2.40384e-11	2.17886e-11	1.78712e-11	1.57688e-11	1.82296e-11	2.18542e-11
6.86	1.99964e-11	2.30388e-11	2.14786e-11	2.14786e-11	2.71243e-11	2.20125e-11	2.56045e-11	2.39275e-11	2.22303e-11	3.36734e-11	2.04181e-11	1.55779e-11	3.06139e-11	2.44121e-11	2.94603e-11	2.23802e-11	1.9231e-11	2.05427e-11	1.62309e-11	2.77703e-11	2.27453e-11	1.92004e-11	1.99278e-11	2.40403e-11	2.17809e-11	1.78718e-11	1.57758e-11	1.82287e-11	2.18472e-11
6.88	1.99953e-11	2.30424e-11	2.14801e-11	2.14801e-11	2.71222e-11	2.20146e-11	2.56062e-11	2.39201e-11	2.22337e-11	3.3665e-11	2.04149e-11	1.55693e-11	3.06132e-11	2.44096e-11	2.94559e-11	2.23799e-11	1.92317e-11	2.05449e-11	1.62429e-11	2.77982e-11	2.2753e-11	1.91972e-11	1.99305e-11	2.40426e-11	2.17877e-11	1.78725e-11	1.5771e-11	1.82323e-11	2.18538e-11
6.9	1.9992e-11	2.30484e-11	2.148e-11	2.148e-11	2.71217e-11	2.20071e-11	2.56087e-11	2.39223e-11	2.22312e-11	3.36576e-11	2.04141e-11	1.55741e-11	3.06017e-11	2.44096e-11	2.94586e-11	2.23849e-11	1.92303e-11	2.05454e-11	1.62291e-11	2.77747e-11	2.27569e-11	1.92031e-11	1.9932e-11	2.40408e-11	2.17912e-11	1.78586e-11	1.57766e-11	1.82333e-11	2.18627e-11
6.92	1.99946e-11	2.30453e-11	2.14811e-11	2.14811e-11	2.7123e-11	2.20106e-11	2.56054e-11	2.39283e-11	2.22257e-11	3.36673e-11	2.04176e-11	1.55754e-11	3.06093e-11	2.44115e-11	2.94579e-11	2.23767e-11	1.92261e-11	2.05465e-11	1.62393e-11	2.77635e-11	2.27466e-11	1.92017e-11	1.99296e-11	2.40369e-11	2.17859e-11	1.78638e-11	1.57578e-11	1.82277e-11	2.18517e-11
6.94	1.99921e-11	2.30479e-11	2.148e-11	2.148e-11	2.71267e-11	2.20097e-11	2.56025e-11	2.39239e-11	2.22276e-11	3.36669e-11	2.04155e-11	1.55755e-11	3.06125e-11	2.4413e-11	2.9457e-11	2.23785e-11	1.92261e-11	2.05373e-11	1.62361e-11	2.77599e-11	2.27518e-11	1.92007e-11	1.99317e-11	2.40385e-11	2.17843e-11	1.78634e-11	1.57688e-11	1.82384e-11	2.18562e-11
6.96	1.99892e-11	2.3039e-11	2.14769e-11	2.14769e-11	2.7125e-11	2.20139e-11	2.5606e-11	2.39231e-11	2.22275e-11	3.36631e-11	2.04108e-11	1.55756e-11	3.06129e-11	2.44096e-11	2.94622e-11	2.23796e-11	1.92236e-11	2.05456e-11	1.6235e-11	2.77718e-11	2.27573e-11	1.92051e-11	1.99339e-11	2.40398e-11	2.17836e-11	1.78618e-11	1.57674e-11	1.82304e-11	2.18539e-11
6.98	1.99943e-11	2.30387e-11	2.14754e-11	2.14754e-11	2.71202e-11	2.20092e-11	2.56092e-11	2.39267e-11	2.22244e-11	3.36715e-11	2.04175e-11	1.5573e-11	3.06105e-11	2.44082e-11	2.94551e-11	2.2379e-11	1.92255e-11	2.05369e-11	1.6235e-11	2.77657e-11	2.27421e-11	1.9201e-11	1.99322e-11	2.40345e-11	2.17819e-11	1.7866e-11	1.57684e-11	1.82294e-11	2.18523e-11
7	1.99878e-11	2.30379e-11	2.14826e-11	2.14826e-11	2.7128e-11	2.20133e-11	2.56062e-11	2.39206e-11	2.22252e-11	3.36628e-11	2.04167e-11	1.55772e-11	3.06128e-11	2.44036e-11	2.94589e-11	2.23786e-11	1.92251e-11	2.0545e-11	1.62411e-11	2.77607e-11	2.27506e-11	1.91927e-11	1.99317e-11	2.40396e-11	2.17876e-11	1.78785e-11	1.57752e-11	1.82393e-11	2.18552e-11
7.02	1.99951e-11	2.30463e-11	2.14812e-11	2.14812e-11	2.71217e-11	2.2004e-11	2.5604e-11	2.39203e-11	2.22283e-11	3.3663e-11	2.04174e-11	1.55701e-11	3.06075e-11	2.44122e-11	2.94597e-11	2.23853e-11	1.92243e-11	2.05463e-11	1.62351e-11	2.77547e-11	2.27529e-11	1.92014e-11	1.9929e-11	2.40385e-11	2.17897e-11	1.78668e-11	1.57652e-11	1.82311e-11	2.18507e-11
7.04	1.99945e-11	2.30514e-11	2.1483e-11	2.1483e-11	2.71222e-11	2.20136e-11	2.56008e-11	2.39228e-11	2.22217e-11	3.367e-11	2.04212e-11	1.55765e-11	3.06096e-11	2.44176e-11	2.946e-11	2.23843e-11	1.92279e-11	2.05414e-11	1.62286e-11	2.77623e-11	2.27554e-11	1.91977e-11	1.99295e-11	2.40387e-11	2.17894e-11	1.78687e-11	1.57707e-11	1.82319e-11	2.18552e-11
7.06	1.99902e-11	2.30507e-11	2.14786e-11	2.14786e-11	2.71193e-11	2.20099e-11	2.56121e-11	2.39198e-11	2.22261e-11	3.36643e-11	2.04123e-11	1.55758e-11	3.061e-11	2.44069e-11	2.9461e-11	2.23789e-11	1.92259e-11	2.05386e-11	1.62208e-11	2.77485e-11	2.27587e-11	1.92009e-11	1.99262e-11	2.40364e-11	2.17899e-11	1.7866e-11	1.5772e-11	1.82345e-11	2.18609e-11
7.08	1.99896e-11	2.3051e-11	2.1489e-11	2.1489e-11	2.71305e-11	2.20173e-11	2.56046e-11	2.39249e-11	2.22278e-11	3.36613e-11	2.04139e-11	1.55759e-11	3.06011e-11	2.44122e-11	2.94577e-11	2.2378e-11	1.92231e-11	2.05447e-11	1.62268e-11	2.77416e-11	2.27496e-11	1.92045e-11	1.99352e-11	2.40346e-11	2.17877e-11	1.78706e-11	1.57659e-11	1.82235e-11	2.18541e-11
7.1	1.99925e-11	2.30535e-11	2.14769e-11	2.14769e-11	2.71214e-11	2.20118e-11	2.56061e-11	2.39247e-11	2.22223e-11	3.3676e-11	2.04169e-11	1.55764e-11	3.06151e-11	2.441e-11	2.94611e-11	2.23817e-11	1.92261e-11	2.05442e-11	1.62343e-11	2.77516e-11	2.27584e-11	1.91984e-11	1.99346e-11	2.40393e-11	2.1791e-11	1.78763e-11	1.57727e-11	1.82317e-11	2.18568e-11
7.12	1.99981e-11	2.30425e-11	2.1484e-11	2.1484e-11	2.71245e-11	2.20123e-11	2.56044e-11	2.39209e-11	2.22281e-11	3.36585e-11	2.04182e-11	1.55694e-11	3.06096e-11	2.44104e-11	2.94616e-11	2.23837e-11	1.92226e-11	2.05349e-11	1.62321e-11	2.77763e-11	2.27515e-11	1.91961e-11	1.99377e-11	2.4042e-11	2.17905e-11	1.78822e-11	1.57825e-11	1.82331e-11	2.18592e-11
7.14	1.99911e-11	2.30467e-11	2.14809e-11	2.14809e-11	2.71214e-11	2.20089e-11	2.56032e-11	2.39273e-11	2.22267e-11	3.36653e-11	2.04175e-11	1.5577e-11	3.06143e-11	2.44084e-11	2.94609e-11	2.23827e-11	1.92262e-11	2.05414e-11	1.6228e-11	2.77887e-11	2.27483e-11	1.91974e-11	1.99413e-11	2.40439e-11	2.1789e-11	1.78523e-11	1.57624e-11	1.82296e-11	2.18533e-11
7.16	1.9993e-11	2.30478e-11	2.14795e-11	2.14795e-11	2.71232e-11	2.20161e-11	2.56051e-11	2.39219e-11	2.2229e-11	3.36587e-11	2.04134e-11	1.55724e-11	3.06057e-11	2.44074e-11	2.94584e-11	2.23821e-11	1.92264e-11	2.05454e-11	1.62314e-11	2.7772e-11	2.27493e-11	1.91975e-11	1.99379e-11	2.40351e-11	2.17852e-11	1.78614e-11	1.57608e-11	1.82334e-11	2.18557e-11
7.18	1.99908e-11	2.30458e-11	2.14894e-11	2.14894e-11	2.71214e-11	2.20065e-11	2.56033e-11	2.39282e-11	2.22279e-11	3.36626e-11	2.04119e-11	1.55714e-11	3.06074e-11	2.44095e-11	2.94606e-11	2.23846e-11	1.92297e-11	2.05501e-11	1.62296e-11	2.77688e-11	2.27517e-11	1.92049e-11	1.99349e-11	2.40332e-11	2.17842e-11	1.78733e-11	1.57681e-11	1.82367e-11	2.18512e-11
7.2	1.99886e-11	2.30416e-11	2.14811e-11	2.14811e-11	2.71235e-11	2.2008e-11	2.56095e-11	2.39073e-11	2.22291e-11	3.36655e-11	2.04202e-11	1.557e-11	3.06032e-11	2.44107e-11	2.94611e-11	2.23779e-11	1.92318e-11	2.05492e-11	1.62353e-11	2.77404e-11	2.27522e-11	1.92033e-11	1.9939e-11	2.40365e-11	2.17837e-11	1.78683e-11	1.57693e-11	1.82306e-11	2.18489e-11
7.22	1.99922e-11	2.30447e-11	2.14785e-11	2.14785e-11	2.71246e-11	2.20096e-11	2.56053e-11	2.39279e-11	2.22342e-11	3.36634e-11	2.04171e-11	1.5575e-11	3.06063e-11	2.44086e-11	2.94567e-11	2.23858e-11	1.9228e-11	2.05467e-11	1.62404e-11	2.77593e-11	2.27485e-11	1.92037e-11	1.99354e-11	2.4041e-11	2.1787e-11	1.78792e-11	1.57638e-11	1.82229e-11	2.18571e-11
7.24	1.99962e-11	2.304e-11	2.14857e-11	2.14857e-11	2.7121e-11	2.20104e-11	2.56017e-11	2.39226e-11	2.22298e-11	3.36612e-11	2.04092e-11	1.55729e-11	3.06097e-11	2.44099e-11	2.94574e-11	2.23783e-11	1.92198e-11	2.05486e-11	1.62343e-11	2.77427e-11	2.27471e-11	1.92027e-11	1.99289e-11	2.40361e-11	2.1791e-11	1.78806e-11	1.57661e-11	1.82285e-11	2.18508e-11
7.26	1.99988e-11	2.30402e-11	2.14764e-11	2.14764e-11	2.71229e-11	2.20072e-11	2.56105e-11	2.39295e-11	2.22198e-11	3.36669e-11	2.04071e-11	1.55723e-11	3.06095e-11	2.44113e-11	2.94576e-11	2.23848e-11	1.92286e-11	2.05456e-11	1.62245e-11	2.77341e-11	2.27514e-11	1.92068e-11	1.99344e-11	2.40403e-11	2.17929e-11	1.78759e-11	1.57655e-11	1.82306e-11	2.18589e-11
7.28	1.99934e-11	2.30479e-11	2.14827e-11	2.14827e-11	2.71191e-11	2.20158e-11	2.5609e-11	2.39293e-11	2.22229e-11	3.36614e-11	2.04121e-11	1.55728e-11	3.06066e-11	2.44097e-11	2.94592e-11	2.23794e-11	1.92258e-11	2.05501e-11	1.62277e-11	2.77726e-11	2.27472e-11	1.92074e-11	1.99297e-11	2.40391e-11	2.17877e-11	1.78774e-11	1.57666e-11	1.82379e-11	2.18538e-11
7.3	2.00001e-11	2.30411e-11	2.14797e-11	2.14797e-11	2.71207e-11	2.20101e-11	2.56058e-11	2.39219e-11	2.22209e-11	3.3664e-11	2.04088e-11	1.55712e-11	3.06082e-11	2.44112e-11	2.94607e-11	2.23788e-11	1.923e-11	2.05519e-11	1.62263e-11	2.77337e-11	2.27491e-11	1.91934e-11	1.99313e-11	2.40368e-11	2.17924e-11	1.78839e-11	1.57732e-11	1.82296e-11	2.18505e-11
7.32	1.99903e-11	2.30458e-11	2.14774e-11	2.14774e-11	2.71241e-11	2.20043e-11	2.56047e-11	2.39004e-11	2.22257e-11	3.36635e-11	2.04146e-11	1.55775e-11	3.06069e-11	2.44095e-11	2.94603e-11	2.2383e-11	1.92301e-11	2.05434e-11	1.62248e-11	2.77473e-11	2.27457e-11	1.92016e-11	1.99288e-11	2.40382e-11	2.1788e-11	1.78856e-11	1.57629e-11	1.82306e-11	2.18575e-11
7.34	1.99904e-11	2.30421e-11	2.14835e-11	2.14835e-11	2.71212e-11	2.20018e-11	2.56022e-11	2.38595e-11	2.22259e-11	3.36565e-11	2.04065e-11	1.5573e-11	3.06122e-11	2.44083e-11	2.94608e-11	2.23819e-11	1.92256e-11	2.05459e-11	1.62337e-11	2.77557e-11	2.27469e-11	1.92004e-11	1.99326e-11	2.40347e-11	2.17875e-11	1.7881e-11	1.57567e-11	1.82339e-11	2.18631e-11
7.36	1.9993e-11	2.30456e-11	2.14852e-11	2.14852e-11	2.71278e-11	2.2007e-11	2.56071e-11	2.38152e-11	2.22282e-11	3.36583e-11	2.04124e-11	1.55742e-11	3.06025e-11	2.44041e-11	2.94615e-11	2.23859e-11	1.92258e-11	2.0553e-11	1.62389e-11	2.77524e-11	2.27512e-11	1.91934e-11	1.99354e-11	2.40343e-11	2.17852e-11	1.78768e-11	1.57708e-11	1.82387e-11	2.18565e-11
7.38	1.99996e-11	2.30381e-11	2.14831e-11	2.14831e-11	2.71265e-11	2.20055e-11	2.56019e-11	2.37602e-11	2.22247e-11	3.36734e-11	2.04155e-11	1.55753e-11	3.06008e-11	2.4403e-11	2.94628e-11	2.23832e-11	1.92255e-11	2.05492e-11	1.62288e-11	2.7736e-11	2.2752e-11	1.91992e-11	1.99332e-11	2.40402e-11	2.17826e-11	1.78751e-11	1.57747e-11	1.82335e-11	2.18551e-11
7.4	1.99988e-11	2.30405e-11	2.14739e-11	2.14739e-11	2.71249e-11	2.20139e-11	2.56026e-11	2.37053e-11	2.22263e-11	3.36644e-11	2.04141e-11	1.55747e-11	3.06124e-11	2.44077e-11	2.94586e-11	2.23813e-11	1.92279e-11	2.05435e-11	1.62323e-11	2.7755e-11	2.27488e-11	1.92035e-11	1.99345e-11	2.40455e-11	2.17887e-11	1.78809e-11	1.57764e-11	1.82356e-11	2.18618e-11
7.42	1.99921e-11	2.30415e-11	2.14859e-11	2.14859e-11	2.71199e-11	2.20054e-11	2.55998e-11	2.36461e-11	2.2227e-11	3.36636e-11	2.04177e-11	1.55769e-11	3.06123e-11	2.44114e-11	2.94635e-11	2.23848e-11	1.92272e-11	2.05503e-11	1.62235e-11	2.77523e-11	2.27542e-11	1.91974e-11	1.9933e-11	2.40376e-11	2.17867e-11	1.78811e-11	1.57707e-11	1.82355e-11	2.18492e-11
7.44	1.99957e-11	2.3044e-11	2.14787e-11	2.14787e-11	2.71255e-11	2.2014e-11	2.56044e-11	2.3603e-11	2.22237e-11	3.36682e-11	2.04145e-11	1.55708e-11	3.06098e-11	2.44078e-11	2.94632e-11	2.23838e-11	1.92309e-11	2.05454e-11	1.62273e-11	2.77477e-11	2.27425e-11	1.92003e-11	1.99289e-11	2.40399e-11	2.17812e-11	1.78862e-11	1.57719e-11	1.82338e-11	2.18565e-11
7.46	1.99969e-11	2.304e-11	2.14786e-11	2.14786e-11	2.71236e-11	2.20074e-11	2.56056e-11	2.35839e-11	2.22285e-11	3.36686e-11	2.04139e-11	1.55767e-11	3.0608e-11	2.44117e-11	2.94567e-11	2.23769e-11	1.92189e-11	2.0539e-11	1.62259e-11	2.77477e-11	2.27456e-11	1.92003e-11	1.99316e-11	2.40374e-11	2.17897e-11	1.78849e-11	1.57695e-11	1.82274e-11	2.18533e-11
7.48	1.99973e-11	2.304e-11	2.14811e-11	2.14811e-11	2.71245e-11	2.20096e-11	2.56e-11	2.35766e-11	2.22324e-11	3.36607e-11	2.0418e-11	1.55694e-11	3.06099e-11	2.44143e-11	2.94595e-11	2.23777e-11	1.92291e-11	2.05476e-11	1.62383e-11	2.77625e-11	2.27428e-11	1.92001e-11	1.99345e-11	2.40396e-11	2.17851e-11	1.7882e-11	1.57779e-11	1.82362e-11	2.18566e-11
7.5	1.99895e-11	2.30429e-11	2.14785e-11	2.14785e-11	2.71232e-11	2.2002e-11	2.5603e-11	2.35684e-11	2.22245e-11	3.36662e-11	2.04167e-11	1.55742e-11	3.06057e-11	2.44057e-11	2.94614e-11	2.23813e-11	1.92311e-11	2.05356e-11	1.62397e-11	2.77622e-11	2.27513e-11	1.92011e-11	1.99287e-11	2.40393e-11	2.17824e-11	1.78779e-11	1.57667e-11	1.8239e-11	2.18588e-11
7.52	1.99934e-11	2.30387e-11	2.14814e-11	2.14814e-11	2.71236e-11	2.20073e-11	2.56037e-11	2.3565e-11	2.22236e-11	3.36583e-11	2.04136e-11	1.55708e-11	3.06044e-11	2.44081e-11	2.94657e-11	2.23822e-11	1.92276e-11	2.05397e-11	1.62383e-11	2.77579e-11	2.27504e-11	1.91994e-11	1.99369e-11	2.40403e-11	2.17866e-11	1.78828e-11	1.57685e-11	1.82336e-11	2.18628e-11
7.54	1.99893e-11	2.3039e-11	2.14837e-11	2.14837e-11	2.71214e-11	2.20062e-11	2.56038e-11	2.3556e-11	2.22247e-11	3.36583e-11	2.04134e-11	1.55713e-11	3.0612e-11	2.44114e-11	2.94659e-11	2.2384e-11	1.92257e-11	2.05384e-11	1.6237e-11	2.7744e-11	2.27469e-11	1.92026e-11	1.99348e-11	2.40385e-11	2.17882e-11	1.78913e-11	1.57633e-11	1.82294e-11	2.18599e-11
7.56	1.99884e-11	2.30411e-11	2.14815e-11	2.14815e-11	2.71233e-11	2.20079e-11	2.56067e-11	2.35577e-11	2.22317e-11	3.36604e-11	2.04106e-11	1.55769e-11	3.06125e-11	2.44089e-11	2.94582e-11	2.23825e-11	1.92282e-11	2.05473e-11	1.62307e-11	2.77379e-11	2.2742e-11	1.9198e-11	1.99378e-11	2.40451e-11	2.17791e-11	1.78826e-11	1.57731e-11	1.82314e-11	2.18571e-11
7.58	1.9999e-11	2.30455e-11	2.14802e-11	2.14802e-11	2.71256e-11	2.20049e-11	2.56041e-11	2.35529e-11	2.22265e-11	3.36545e-11	2.04139e-11	1.55728e-11	3.06089e-11	2.44107e-11	2.94602e-11	2.23821e-11	1.92315e-11	2.05429e-11	1.62292e-11	2.77694e-11	2.27445e-11	1.92068e-11	1.99371e-11	2.4044e-11	2.17888e-11	1.78871e-11	1.57575e-11	1.82347e-11	2.18555e-11
7.6	1.99911e-11	2.30453e-11	2.14839e-11	2.14839e-11	2.71213e-11	2.20099e-11	2.55995e-11	2.35444e-11	2.22229e-11	3.36582e-11	2.04142e-11	1.55729e-11	3.06096e-11	2.44117e-11	2.94633e-11	2.23863e-11	1.92287e-11	2.05539e-11	1.62365e-11	2.77348e-11	2.27486e-11	1.91994e-11	1.99352e-11	2.40456e-11	2.17844e-11	1.78807e-11	1.5775e-11	1.82343e-11	2.18539e-11
7.62	1.99946e-11	2.30401e-11	2.14799e-11	2.14799e-11	2.71244e-11	2.20093e-11	2.56048e-11	2.35439e-11	2.22298e-11	3.36552e-11	2.0416e-11	1.55737e-11	3.06127e-11	2.44056e-11	2.94597e-11	2.23811e-11	1.9228e-11	2.05494e-11	1.62291e-11	2.77552e-11	2.27499e-11	1.91975e-11	1.99358e-11	2.4043e-11	2.17842e-11	1.78779e-11	1.57703e-11	1.82327e-11	2.18503e-11
7.64	1.9993e-11	2.30439e-11	2.14843e-11	2.14843e-11	2.71245e-11	2.2004e-11	2.5602e-11	2.35326e-11	2.22231e-11	3.36702e-11	2.04103e-11	1.55753e-11	3.06086e-11	2.44086e-11	2.94623e-11	2.23774e-11	1.92341e-11	2.05416e-11	1.62413e-11	2.77515e-11	2.27489e-11	1.92051e-11	1.99372e-11	2.40428e-11	2.17836e-11	1.78749e-11	1.57611e-11	1.8232e-11	2.18561e-11
7.66	1.99968e-11	2.3045e-11	2.14848e-11	2.14848e-11	2.71279e-11	2.20078e-11	2.5608e-11	2.35351e-11	2.22186e-11	3.36618e-11	2.04105e-11	1.55702e-11	3.06093e-11	2.44105e-11	2.94589e-11	2.2382e-11	1.9227e-11	2.05495e-11	1.62418e-11	2.77807e-11	2.275e-11	1.92018e-11	1.9935e-11	2.40436e-11	2.17854e-11	1.78769e-11	1.57652e-11	1.82277e-11	2.18659e-11
7.68	1.99962e-11	2.30421e-11	2.1487e-11	2.1487e-11	2.71252e-11	2.2001e-11	2.56062e-11	2.35383e-11	2.2225e-11	3.366e-11	2.04113e-11	1.55755e-11	3.06105e-11	2.44123e-11	2.94596e-11	2.23878e-11	1.92246e-11	2.05386e-11	1.62478e-11	2.77699e-11	2.2748e-11	1.92056e-11	1.99349e-11	2.40384e-11	2.1789e-11	1.78751e-11	1.57672e-11	1.82286e-11	2.18555e-11
7.7	1.99934e-11	2.30354e-11	2.14836e-11	2.14836e-11	2.71248e-11	2.20076e-11	2.56017e-11	2.3526e-11	2.22217e-11	3.36622e-11	2.04166e-11	1.55699e-11	3.06056e-11	2.44086e-11	2.94653e-11	2.23865e-11	1.92257e-11	2.05485e-11	1.62376e-11	2.77616e-11	2.27529e-11	1.91996e-11	1.99392e-11	2.40391e-11	2.17904e-11	1.78784e-11	1.57567e-11	1.82324e-11	2.18356e-11
7.72	1.99861e-11	2.30473e-11	2.14818e-11	2.14818e-11	2.71243e-11	2.20096e-11	2.56068e-11	2.35319e-11	2.22225e-11	3.36529e-11	2.04161e-11	1.55761e-11	3.06078e-11	2.44074e-11	2.94695e-11	2.23874e-11	1.92314e-11	2.05462e-11	1.62325e-11	2.78383e-11	2.27489e-11	1.91986e-11	1.99377e-11	2.40408e-11	2.17835e-11	1.78761e-11	1.57676e-11	1.82343e-11	2.18461e-11
7.74	1.9987e-11	2.30492e-11	2.14901e-11	2.14901e-11	2.71224e-11	2.2006e-11	2.56017e-11	2.35225e-11	2.22218e-11	3.36588e-11	2.04114e-11	1.55716e-11	3.06077e-11	2.44062e-11	2.9463e-11	2.23862e-11	1.92307e-11	2.05401e-11	1.62284e-11	2.77417e-11	2.27514e-11	1.92007e-11	1.99331e-11	2.40394e-11	2.17846e-11	1.78745e-11	1.57666e-11	1.82351e-11	2.1837e-11
7.76	1.99986e-11	2.30518e-11	2.14766e-11	2.14766e-11	2.71311e-11	2.20067e-11	2.56022e-11	2.35203e-11	2.22211e-11	3.36511e-11	2.04149e-11	1.55693e-11	3.0614e-11	2.44017e-11	2.94552e-11	2.23859e-11	1.92367e-11	2.05461e-11	1.62308e-11	2.77814e-11	2.2751e-11	1.91995e-11	1.99325e-11	2.40382e-11	2.17828e-11	1.78784e-11	1.57635e-11	1.82324e-11	2.18441e-11
7.78	1.99992e-11	2.30398e-11	2.14789e-11	2.14789e-11	2.71255e-11	2.2011e-11	2.56071e-11	2.35178e-11	2.22213e-11	3.36683e-11	2.0417e-11	1.55704e-11	3.06098e-11	2.44111e-11	2.94635e-11	2.23828e-11	1.92276e-11	2.05484e-11	1.62241e-11	2.7732e-11	2.2747e-11	1.92029e-11	1.99344e-11	2.40401e-11	2.17866e-11	1.78819e-11	1.57704e-11	1.82317e-11	2.18442e-11
7.8	1.99995e-11	2.30458e-11	2.14799e-11	2.14799e-11	2.7124e-11	2.20153e-11	2.56012e-11	2.35119e-11	2.22257e-11	3.36616e-11	2.04127e-11	1.55748e-11	3.06077e-11	2.44111e-11	2.94607e-11	2.23838e-11	1.92315e-11	2.05496e-11	1.62361e-11	2.77363e-11	2.27433e-11	1.91976e-11	1.99366e-11	2.40423e-11	2.17876e-11	1.78911e-11	1.57714e-11	1.82327e-11	2.18434e-11
7.82	1.99886e-11	2.30464e-11	2.14818e-11	2.14818e-11	2.71245e-11	2.20108e-11	2.56064e-11	2.35141e-11	2.22227e-11	3.36553e-11	2.04114e-11	1.55754e-11	3.06102e-11	2.44067e-11	2.94576e-11	2.23865e-11	1.92253e-11	2.0551e-11	1.62234e-11	2.77085e-11	2.27577e-11	1.92075e-11	1.99329e-11	2.40442e-11	2.17837e-11	1.78724e-11	1.57729e-11	1.82351e-11	2.18581e-11
7.84	1.9991e-11	2.30423e-11	2.14832e-11	2.14832e-11	2.71241e-11	2.20033e-11	2.56042e-11	2.35053e-11	2.22279e-11	3.3653e-11	2.041e-11	1.55734e-11	3.06128e-11	2.4408e-11	2.94573e-11	2.23875e-11	1.92266e-11	2.05471e-11	1.62344e-11	2.76188e-11	2.27501e-11	1.9202e-11	1.99345e-11	2.40406e-11	2.17924e-11	1.78903e-11	1.57653e-11	1.82399e-11	2.18556e-11
7.86	1.99908e-11	2.30522e-11	2.14785e-11	2.14785e-11	2.71242e-11	2.20045e-11	2.56044e-11	2.35024e-11	2.22247e-11	3.36658e-11	2.04174e-11	1.5569e-11	3.06054e-11	2.44084e-11	2.94591e-11	2.2383e-11	1.9227e-11	2.05483e-11	1.62314e-11	2.75131e-11	2.27449e-11	1.92008e-11	1.99354e-11	2.4039e-11	2.17853e-11	1.78858e-11	1.57645e-11	1.82344e-11	2.18472e-11
7.88	1.99902e-11	2.30438e-11	2.14808e-11	2.14808e-11	2.71231e-11	2.20037e-11	2.55995e-11	2.34958e-11	2.2221e-11	3.36646e-11	2.04146e-11	1.55717e-11	3.06107e-11	2.44103e-11	2.94538e-11	2.23826e-11	1.92266e-11	2.05473e-11	1.62287e-11	2.74644e-11	2.27501e-11	1.92012e-11	1.9934e-11	2.40396e-11	2.17855e-11	1.78851e-11	1.57738e-11	1.82354e-11	2.18496e-11
7.9	1.9995e-11	2.30473e-11	2.14819e-11	2.14819e-11	2.71158e-11	2.20066e-11	2.56041e-11	2.34993e-11	2.22257e-11	3.36522e-11	2.04167e-11	1.55742e-11	3.06086e-11	2.44134e-11	2.94496e-11	2.23824e-11	1.92286e-11	2.055e-11	1.62264e-11	2.73604e-11	2.27481e-11	1.92019e-11	1.99379e-11	2.40418e-11	2.17824e-11	1.78948e-11	1.57661e-11	1.82353e-11	2.18537e-11
7.92	1.99917e-11	2.30487e-11	2.1481e-11	2.1481e-11	2.71196e-11	2.20088e-11	2.56036e-11	2.34988e-11	2.2224e-11	3.36545e-11	2.04133e-11	1.55732e-11	3.06082e-11	2.44076e-11	2.94585e-11	2.23792e-11	1.9228e-11	2.05498e-11	1.62215e-11	2.73559e-11	2.27466e-11	1.92043e-11	1.99344e-11	2.40416e-11	2.17827e-11	1.78926e-11	1.57619e-11	1.82289e-11	2.18577e-11
7.94	1.99923e-11	2.30411e-11	2.14779e-11	2.14779e-11	2.71189e-11	2.20003e-11	2.56059e-11	2.34926e-11	2.2227e-11	3.36606e-11	2.04142e-11	1.55693e-11	3.06097e-11	2.44054e-11	2.94588e-11	2.23804e-11	1.92217e-11	2.05467e-11	1.62225e-11	2.73508e-11	2.27538e-11	1.92068e-11	1.99386e-11	2.40383e-11	2.17883e-11	1.78896e-11	1.5766e-11	1.82365e-11	2.18477e-11
7.96	1.99967e-11	2.3048e-11	2.14811e-11	2.14811e-11	2.71282e-11	2.20031e-11	2.56085e-11	2.34884e-11	2.2228e-11	3.36604e-11	2.04157e-11	1.55763e-11	3.06096e-11	2.44056e-11	2.94586e-11	2.23788e-11	1.92211e-11	2.05441e-11	1.62301e-11	2.73424e-11	2.27543e-11	1.92075e-11	1.99364e-11	2.40369e-11	2.17874e-11	1.78822e-11	1.57675e-11	1.82319e-11	2.18532e-11
7.98	1.99919e-11	2.30431e-11	2.1482e-11	2.1482e-11	2.71212e-11	2.20071e-11	2.56067e-11	2.34886e-11	2.22282e-11	3.36661e-11	2.04087e-11	1.5572e-11	3.06139e-11	2.44087e-11	2.94518e-11	2.23865e-11	1.92276e-11	2.05499e-11	1.62222e-11	2.72898e-11	2.27538e-11	1.92042e-11	1.99368e-11	2.40351e-11	2.17859e-11	1.78824e-11	1.57567e-11	1.82362e-11	2.18518e-11
8	1.99877e-11	2.30488e-11	2.14784e-11	2.14784e-11	2.71267e-11	2.20013e-11	2.56038e-11	2.34835e-11	2.22307e-11	3.36559e-11	2.04184e-11	1.55734e-11	3.06106e-11	2.44058e-11	2.94549e-11	2.23854e-11	1.92239e-11	2.05465e-11	1.62259e-11	2.7332e-11	2.27524e-11	1.92017e-11	1.99375e-11	2.40363e-11	2.17841e-11	1.78901e-11	1.5774e-11	1.82405e-11	2.18445e-11
8.02	1.99952e-11	2.30511e-11	2.14796e-11	2.14796e-11	2.71219e-11	2.20033e-11	2.55965e-11	2.34799e-11	2.22303e-11	3.366e-11	2.04144e-11	1.55695e-11	3.06101e-11	2.44066e-11	2.94536e-11	2.23874e-11	1.92296e-11	2.05541e-11	1.62263e-11	2.73249e-11	2.27576e-11	1.91993e-11	1.99352e-11	2.40381e-11	2.17832e-11	1.78849e-11	1.57754e-11	1.82359e-11	2.18516e-11
8.04	1.99874e-11	2.30404e-11	2.14783e-11	2.14783e-11	2.71179e-11	2.20062e-11	2.56053e-11	2.34777e-11	2.22266e-11	3.36573e-11	2.04127e-11	1.55723e-11	3.06087e-11	2.44039e-11	2.94554e-11	2.23848e-11	1.92274e-11	2.05468e-11	1.6231e-11	2.7315e-11	2.27538e-11	1.92016e-11	1.99335e-11	2.40361e-11	2.17877e-11	1.7879e-11	1.57692e-11	1.82321e-11	2.18467e-11
8.06	1.99912e-11	2.3042e-11	2.14812e-11	2.14812e-11	2.71244e-11	2.20033e-11	2.56054e-11	2.34768e-11	2.22233e-11	3.36597e-11	2.04119e-11	1.55742e-11	3.06083e-11	2.44157e-11	2.94546e-11	2.23885e-11	1.92312e-11	2.05424e-11	1.62283e-11	2.72833e-11	2.27488e-11	1.92019e-11	1.99378e-11	2.40383e-11	2.17934e-11	1.78815e-11	1.5774e-11	1.82372e-11	2.18565e-11
8.08	1.99908e-11	2.30469e-11	2.14807e-11	2.14807e-11	2.71221e-11	2.20048e-11	2.56013e-11	2.34727e-11	2.22263e-11	3.36548e-11	2.04151e-11	1.55683e-11	3.06142e-11	2.4411e-11	2.94557e-11	2.23852e-11	1.92288e-11	2.05466e-11	1.62353e-11	2.73285e-11	2.27525e-11	1.92056e-11	1.99415e-11	2.40341e-11	2.1789e-11	1.78867e-11	1.57683e-11	1.82351e-11	2.18544e-11
8.1	1.99989e-11	2.30424e-11	2.14828e-11	2.14828e-11	2.71258e-11	2.20026e-11	2.56018e-11	2.34679e-11	2.22266e-11	3.36563e-11	2.0412e-11	1.55692e-11	3.06127e-11	2.44064e-11	2.94619e-11	2.23826e-11	1.92273e-11	2.05485e-11	1.62293e-11	2.72834e-11	2.27544e-11	1.92017e-11	1.9939e-11	2.40409e-11	2.17864e-11	1.78812e-11	1.57649e-11	1.82374e-11	2.18453e-11
8.12	1.99918e-11	2.30412e-11	2.14801e-11	2.14801e-11	2.7121e-11	2.20099e-11	2.5607e-11	2.34654e-11	2.22287e-11	3.3651e-11	2.0421e-11	1.55672e-11	3.0607e-11	2.44074e-11	2.94589e-11	2.23833e-11	1.92268e-11	2.05433e-11	1.62226e-11	2.73132e-11	2.2751e-11	1.92002e-11	1.99327e-11	2.40378e-11	2.17841e-11	1.78795e-11	1.57697e-11	1.82343e-11	2.18497e-11
8.14	1.99977e-11	2.30448e-11	2.14809e-11	2.14809e-11	2.71232e-11	2.20058e-11	2.56041e-11	2.34603e-11	2.22265e-11	3.36576e-11	2.04155e-11	1.55737e-11	3.0611e-11	2.44065e-11	2.94546e-11	2.23881e-11	1.92265e-11	2.05466e-11	1.62249e-11	2.731e-11	2.27546e-11	1.92026e-11	1.99423e-11	2.40357e-11	2.17813e-11	1.78941e-11	1.5759e-11	1.82291e-11	2.1857e-11
8.16	1.99943e-11	2.30429e-11	2.14879e-11	2.14879e-11	2.71246e-11	2.20151e-11	2.5603e-11	2.3457e-11	2.22292e-11	3.36462e-11	2.0416e-11	1.55664e-11	3.0608e-11	2.44102e-11	2.94494e-11	2.23827e-11	1.92275e-11	2.05495e-11	1.62295e-11	2.72782e-11	2.27504e-11	1.9203e-11	1.99378e-11	2.40387e-11	2.17765e-11	1.78864e-11	1.57713e-11	1.82308e-11	2.18609e-11
8.18	1.99964e-11	2.30399e-11	2.14863e-11	2.14863e-11	2.71257e-11	2.20113e-11	2.56029e-11	2.34526e-11	2.22258e-11	3.36555e-11	2.04186e-11	1.55683e-11	3.06098e-11	2.44055e-11	2.94588e-11	2.23847e-11	1.92292e-11	2.05478e-11	1.62356e-11	2.7307e-11	2.27487e-11	1.92045e-11	1.99372e-11	2.40353e-11	2.17738e-11	1.78935e-11	1.57667e-11	1.82298e-11	2.18587e-11
8.2	1.99953e-11	2.3044e-11	2.1482e-11	2.1482e-11	2.71246e-11	2.20043e-11	2.56039e-11	2.34509e-11	2.22286e-11	3.36506e-11	2.04151e-11	1.55713e-11	3.06133e-11	2.44102e-11	2.94544e-11	2.23881e-11	1.92272e-11	2.05437e-11	1.62357e-11	2.72709e-11	2.2749e-11	1.91991e-11	1.99358e-11	2.40362e-11	2.1771e-11	1.78905e-11	1.57716e-11	1.82379e-11	2.18573e-11
8.22	1.99942e-11	2.30452e-11	2.14865e-11	2.14865e-11	2.71231e-11	2.20017e-11	2.56071e-11	2.34465e-11	2.22314e-11	3.36483e-11	2.04174e-11	1.5572e-11	3.0616e-11	2.44112e-11	2.94533e-11	2.23839e-11	1.92245e-11	2.05556e-11	1.62351e-11	2.72855e-11	2.27442e-11	1.92038e-11	1.99336e-11	2.40406e-11	2.17841e-11	1.78779e-11	1.57672e-11	1.82369e-11	2.18538e-11
8.24	1.99961e-11	2.30507e-11	2.14892e-11	2.14892e-11	2.71224e-11	2.20065e-11	2.56092e-11	2.3443e-11	2.22289e-11	3.36569e-11	2.04189e-11	1.557e-11	3.06092e-11	2.44059e-11	2.94495e-11	2.23861e-11	1.92251e-11	2.05469e-11	1.62344e-11	2.72842e-11	2.27477e-11	1.92034e-11	1.99318e-11	2.40376e-11	2.17883e-11	1.78902e-11	1.57715e-11	1.82365e-11	2.18555e-11
8.26	1.99993e-11	2.30479e-11	2.1486e-11	2.1486e-11	2.7129e-11	2.20075e-11	2.56079e-11	2.34449e-11	2.22213e-11	3.36588e-11	2.04208e-11	1.5573e-11	3.06106e-11	2.44081e-11	2.94569e-11	2.23885e-11	1.92301e-11	2.05476e-11	1.62396e-11	2.72592e-11	2.27513e-11	1.91964e-11	1.99338e-11	2.4043e-11	2.17884e-11	1.78777e-11	1.57673e-11	1.82337e-11	2.18524e-11
8.28	1.99958e-11	2.30446e-11	2.14835e-11	2.14835e-11	2.71265e-11	2.20151e-11	2.56036e-11	2.34442e-11	2.22209e-11	3.36443e-11	2.042e-11	1.55708e-11	3.06098e-11	2.44077e-11	2.94476e-11	2.23856e-11	1.92284e-11	2.05455e-11	1.62267e-11	2.72854e-11	2.27422e-11	1.92028e-11	1.99388e-11	2.40328e-11	2.17976e-11	1.78798e-11	1.57572e-11	1.82396e-11	2.18542e-11
8.3	2.0001e-11	2.30417e-11	2.14814e-11	2.14814e-11	2.71256e-11	2.20027e-11	2.56072e-11	2.34383e-11	2.22271e-11	3.366e-11	2.04152e-11	1.55705e-11	3.06144e-11	2.4408e-11	2.94488e-11	2.23826e-11	1.92258e-11	2.05514e-11	1.62294e-11	2.72975e-11	2.27432e-11	1.91991e-11	1.99398e-11	2.40397e-11	2.17885e-11	1.78747e-11	1.57612e-11	1.82364e-11	2.18517e-11
8.32	1.99944e-11	2.3047e-11	2.14835e-11	2.14835e-11	2.71247e-11	2.19919e-11	2.56035e-11	2.3436e-11	2.22309e-11	3.36556e-11	2.04176e-11	1.55703e-11	3.06108e-11	2.44063e-11	2.94557e-11	2.23923e-11	1.9227e-11	2.05462e-11	1.62337e-11	2.72305e-11	2.2752e-11	1.92023e-11	1.99342e-11	2.40401e-11	2.17952e-11	1.78834e-11	1.57682e-11	1.82327e-11	2.18514e-11
8.34	1.99966e-11	2.30447e-11	2.14859e-11	2.14859e-11	2.71226e-11	2.19976e-11	2.56005e-11	2.34317e-11	2.22284e-11	3.36527e-11	2.04186e-11	1.55643e-11	3.0611e-11	2.44107e-11	2.94526e-11	2.23805e-11	1.92317e-11	2.05518e-11	1.62262e-11	2.72729e-11	2.27507e-11	1.92007e-11	1.99372e-11	2.40415e-11	2.17837e-11	1.78708e-11	1.57586e-11	1.82334e-11	2.18482e-11
8.36	1.99894e-11	2.30502e-11	2.14767e-11	2.14767e-11	2.71239e-11	2.20028e-11	2.56061e-11	2.3433e-11	2.22251e-11	3.3654e-11	2.04167e-11	1.55663e-11	3.06056e-11	2.44111e-11	2.94511e-11	2.23824e-11	1.92249e-11	2.05415e-11	1.62231e-11	2.7259e-11	2.27476e-11	1.91978e-11	1.99418e-11	2.40396e-11	2.17928e-11	1.78839e-11	1.57702e-11	1.82348e-11	2.18518e-11
8.38	1.99965e-11	2.30484e-11	2.14795e-11	2.14795e-11	2.71218e-11	2.19987e-11	2.56028e-11	2.34352e-11	2.22285e-11	3.36601e-11	2.04221e-11	1.55723e-11	3.06062e-11	2.44115e-11	2.94484e-11	2.23829e-11	1.92278e-11	2.05431e-11	1.62205e-11	2.72918e-11	2.27505e-11	1.92024e-11	1.99369e-11	2.40379e-11	2.17972e-11	1.78814e-11	1.57675e-11	1.82263e-11	2.1855e-11
8.4	1.99941e-11	2.30415e-11	2.14847e-11	2.14847e-11	2.71251e-11	2.19964e-11	2.55966e-11	2.34245e-11	2.22272e-11	3.36579e-11	2.04232e-11	1.5567e-11	3.06139e-11	2.44066e-11	2.94477e-11	2.23834e-11	1.92194e-11	2.05429e-11	1.62285e-11	2.72449e-11	2.2747e-11	1.91976e-11	1.99296e-11	2.4041e-11	2.17931e-11	1.78873e-11	1.57704e-11	1.82303e-11	2.18605e-11
8.42	1.99922e-11	2.30513e-11	2.14797e-11	2.14797e-11	2.71238e-11	2.20035e-11	2.56015e-11	2.34255e-11	2.22319e-11	3.36485e-11	2.04258e-11	1.55673e-11	3.061e-11	2.4413e-11	2.94492e-11	2.2382e-11	1.92265e-11	2.05383e-11	1.6231e-11	2.72653e-11	2.27522e-11	1.92037e-11	1.99318e-11	2.40403e-11	2.17934e-11	1.78771e-11	1.57607e-11	1.82327e-11	2.18573e-11
8.44	1.99849e-11	2.30381e-11	2.14858e-11	2.14858e-11	2.71183e-11	2.20048e-11	2.55968e-11	2.34182e-11	2.22257e-11	3.36531e-11	2.04198e-11	1.55649e-11	3.06151e-11	2.44118e-11	2.9448e-11	2.23888e-11	1.92212e-11	2.05489e-11	1.62287e-11	2.72478e-11	2.27516e-11	1.9203e-11	1.99382e-11	2.40399e-11	2.17927e-11	1.78813e-11	1.57777e-11	1.82282e-11	2.18547e-11
8.46	1.99962e-11	2.30473e-11	2.14779e-11	2.14779e-11	2.71264e-11	2.20049e-11	2.56046e-11	2.34186e-11	2.22255e-11	3.36471e-11	2.04186e-11	1.55729e-11	3.06103e-11	2.44059e-11	2.94514e-11	2.23859e-11	1.92245e-11	2.05404e-11	1.62335e-11	2.72417e-11	2.27563e-11	1.92069e-11	1.99336e-11	2.40399e-11	2.17909e-11	1.78791e-11	1.57677e-11	1.82284e-11	2.18542e-11
8.48	2.0001e-11	2.30471e-11	2.14803e-11	2.14803e-11	2.71266e-11	2.20102e-11	2.56066e-11	2.34155e-11	2.22329e-11	3.3648e-11	2.04143e-11	1.55705e-11	3.06103e-11	2.44084e-11	2.94512e-11	2.23821e-11	1.92274e-11	2.05427e-11	1.62253e-11	2.72512e-11	2.27513e-11	1.91999e-11	1.99286e-11	2.40388e-11	2.17904e-11	1.78756e-11	1.57733e-11	1.82387e-11	2.18572e-11
8.5	1.99917e-11	2.30408e-11	2.14828e-11	2.14828e-11	2.71208e-11	2.20019e-11	2.56067e-11	2.34222e-11	2.22311e-11	3.365e-11	2.04176e-11	1.55706e-11	3.06117e-11	2.44046e-11	2.94485e-11	2.2382e-11	1.92255e-11	2.05438e-11	1.62185e-11	2.72184e-11	2.27424e-11	1.9205e-11	1.99285e-11	2.40378e-11	2.17931e-11	1.78773e-11	1.57762e-11	1.82323e-11	2.186e-11
8.52	1.99918e-11	2.30404e-11	2.14793e-11	2.14793e-11	2.71268e-11	2.19959e-11	2.55999e-11	2.34154e-11	2.22277e-11	3.36517e-11	2.04188e-11	1.5574e-11	3.06078e-11	2.44048e-11	2.94499e-11	2.23864e-11	1.9229e-11	2.05524e-11	1.62096e-11	2.719e-11	2.27488e-11	1.92012e-11	1.99325e-11	2.40425e-11	2.17964e-11	1.78616e-11	1.57699e-11	1.82373e-11	2.18645e-11
8.54	1.99902e-11	2.30425e-11	2.14837e-11	2.14837e-11	2.7128e-11	2.20021e-11	2.56008e-11	2.3407e-11	2.223e-11	3.36499e-11	2.04198e-11	1.5571e-11	3.06095e-11	2.44098e-11	2.94493e-11	2.23807e-11	1.92286e-11	2.05487e-11	1.62265e-11	2.72195e-11	2.27463e-11	1.92021e-11	1.99278e-11	2.40338e-11	2.17955e-11	1.78853e-11	1.57735e-11	1.82316e-11	2.18555e-11
8.56	1.99915e-11	2.3048e-11	2.14798e-11	2.14798e-11	2.71196e-11	2.2005e-11	2.5605e-11	2.34164e-11	2.22325e-11	3.36429e-11	2.04155e-11	1.55719e-11	3.06059e-11	2.4408e-11	2.94483e-11	2.23815e-11	1.92295e-11	2.05468e-11	1.62145e-11	2.72078e-11	2.27531e-11	1.91972e-11	1.99282e-11	2.40432e-11	2.1788e-11	1.78831e-11	1.57739e-11	1.82331e-11	2.18547e-11
8.58	1.99934e-11	2.30451e-11	2.14855e-11	2.14855e-11	2.71262e-11	2.19949e-11	2.56061e-11	2.34096e-11	2.2229e-11	3.36497e-11	2.04213e-11	1.55736e-11	3.06058e-11	2.44135e-11	2.94466e-11	2.23828e-11	1.92257e-11	2.05421e-11	1.62186e-11	2.72211e-11	2.27504e-11	1.9201e-11	1.99284e-11	2.4036e-11	2.17889e-11	1.78871e-11	1.57707e-11	1.823e-11	2.18575e-11
8.6	1.99972e-11	2.30457e-11	2.14826e-11	2.14826e-11	2.7122e-11	2.20048e-11	2.56038e-11	2.34094e-11	2.22309e-11	3.36534e-11	2.04167e-11	1.55696e-11	3.06125e-11	2.44107e-11	2.94478e-11	2.23849e-11	1.92277e-11	2.05498e-11	1.62295e-11	2.72407e-11	2.27474e-11	1.92008e-11	1.99346e-11	2.40401e-11	2.17972e-11	1.78705e-11	1.57583e-11	1.82249e-11	2.1862e-11
8.62	1.99907e-11	2.30502e-11	2.14826e-11	2.14826e-11	2.71275e-11	2.19968e-11	2.56009e-11	2.34014e-11	2.22357e-11	3.36499e-11	2.04206e-11	1.55686e-11	3.06066e-11	2.44085e-11	2.9454e-11	2.23834e-11	1.92271e-11	2.05496e-11	1.62302e-11	2.72535e-11	2.27473e-11	1.91989e-11	1.99297e-11	2.40388e-11	2.17972e-11	1.78825e-11	1.57752e-11	1.82297e-11	2.18588e-11
8.64	1.99888e-11	2.30538e-11	2.14846e-11	2.14846e-11	2.71206e-11	2.20081e-11	2.56059e-11	2.34053e-11	2.22281e-11	3.36476e-11	2.04213e-11	1.55762e-11	3.06059e-11	2.44096e-11	2.94559e-11	2.23799e-11	1.92257e-11	2.05508e-11	1.62238e-11	2.72147e-11	2.27445e-11	1.92001e-11	1.99346e-11	2.40436e-11	2.17918e-11	1.7891e-11	1.57693e-11	1.82374e-11	2.18541e-11
8.66	2.00004e-11	2.30432e-11	2.14866e-11	2.14866e-11	2.71262e-11	2.20098e-11	2.56067e-11	2.3397e-11	2.22295e-11	3.36476e-11	2.04174e-11	1.55709e-11	3.06104e-11	2.44084e-11	2.94541e-11	2.23841e-11	1.92267e-11	2.05507e-11	1.62235e-11	2.71986e-11	2.27403e-11	1.91995e-11	1.99291e-11	2.40422e-11	2.17937e-11	1.78864e-11	1.57721e-11	1.82322e-11	2.18582e-11
8.68	1.99966e-11	2.30438e-11	2.14767e-11	2.14767e-11	2.71207e-11	2.20001e-11	2.5611e-11	2.33917e-11	2.22277e-11	3.36524e-11	2.04154e-11	1.55721e-11	3.06127e-11	2.44056e-11	2.94594e-11	2.23848e-11	1.92334e-11	2.05478e-11	1.62253e-11	2.72026e-11	2.27552e-11	1.92038e-11	1.99317e-11	2.40436e-11	2.17956e-11	1.78797e-11	1.577e-11	1.82366e-11	2.18549e-11
8.7	1.99946e-11	2.30485e-11	2.14874e-11	2.14874e-11	2.71238e-11	2.20056e-11	2.56011e-11	2.33971e-11	2.22299e-11	3.36467e-11	2.04132e-11	1.55728e-11	3.06144e-11	2.44046e-11	2.94531e-11	2.23867e-11	1.92299e-11	2.05508e-11	1.6218e-11	2.72072e-11	2.27479e-11	1.92052e-11	1.99284e-11	2.40409e-11	2.17951e-11	1.78872e-11	1.57667e-11	1.823e-11	2.18618e-11
8.72	1.99917e-11	2.30449e-11	2.14876e-11	2.14876e-11	2.71243e-11	2.20079e-11	2.56081e-11	2.33923e-11	2.22267e-11	3.36495e-11	2.04219e-11	1.55714e-11	3.06066e-11	2.44115e-11	2.94522e-11	2.23836e-11	1.92292e-11	2.05407e-11	1.62151e-11	2.71968e-11	2.27453e-11	1.92043e-11	1.99314e-11	2.40448e-11	2.17938e-11	1.7883e-11	1.57648e-11	1.82371e-11	2.18528e-11
8.74	1.9997e-11	2.30448e-11	2.14833e-11	2.14833e-11	2.71255e-11	2.20067e-11	2.56024e-11	2.33948e-11	2.22276e-11	3.36504e-11	2.04149e-11	1.55698e-11	3.06043e-11	2.44042e-11	2.94576e-11	2.23918e-11	1.92321e-11	2.05351e-11	1.62187e-11	2.71956e-11	2.27577e-11	1.92045e-11	1.99295e-11	2.40439e-11	2.17946e-11	1.78892e-11	1.57592e-11	1.82387e-11	2.18593e-11
8.76	1.99956e-11	2.3048e-11	2.14829e-11	2.14829e-11	2.71247e-11	2.19956e-11	2.56035e-11	2.33862e-11	2.2228e-11	3.36456e-11	2.04229e-11	1.55701e-11	3.06024e-11	2.44117e-11	2.94543e-11	2.23908e-11	1.92268e-11	2.05318e-11	1.62238e-11	2.71929e-11	2.27515e-11	1.91947e-11	1.99285e-11	2.40431e-11	2.17965e-11	1.78811e-11	1.57734e-11	1.82309e-11	2.1863e-11
8.78	1.99929e-11	2.30471e-11	2.14861e-11	2.14861e-11	2.71217e-11	2.19965e-11	2.56078e-11	2.33889e-11	2.22257e-11	3.36455e-11	2.04194e-11	1.55747e-11	3.06077e-11	2.44102e-11	2.94544e-11	2.23869e-11	1.92227e-11	2.05333e-11	1.62211e-11	2.71847e-11	2.27455e-11	1.91973e-11	1.99301e-11	2.40395e-11	2.17943e-11	1.7882e-11	1.57724e-11	1.82325e-11	2.1864e-11
8.8	1.99946e-11	2.30493e-11	2.148e-11	2.148e-11	2.71266e-11	2.20024e-11	2.56037e-11	2.33864e-11	2.22295e-11	3.36473e-11	2.04193e-11	1.5571e-11	3.06068e-11	2.44064e-11	2.94575e-11	2.23875e-11	1.92257e-11	2.05368e-11	1.6212e-11	2.72041e-11	2.27526e-11	1.91972e-11	1.99312e-11	2.40374e-11	2.17967e-11	1.78735e-11	1.57705e-11	1.82379e-11	2.18643e-11
8.82	1.99901e-11	2.30514e-11	2.14823e-11	2.14823e-11	2.71223e-11	2.20059e-11	2.56103e-11	2.33911e-11	2.22296e-11	3.36448e-11	2.04235e-11	1.55759e-11	3.06116e-11	2.44142e-11	2.94598e-11	2.23849e-11	1.92356e-11	2.05363e-11	1.62155e-11	2.71873e-11	2.27571e-11	1.92069e-11	1.99324e-11	2.40386e-11	2.17943e-11	1.78874e-11	1.57632e-11	1.82351e-11	2.1861e-11
8.84	1.99907e-11	2.30477e-11	2.14812e-11	2.14812e-11	2.71264e-11	2.19996e-11	2.56052e-11	2.33822e-11	2.22283e-11	3.36425e-11	2.04217e-11	1.55718e-11	3.06071e-11	2.44036e-11	2.94573e-11	2.2387e-11	1.92322e-11	2.05386e-11	1.62354e-11	2.71737e-11	2.2752e-11	1.92003e-11	1.99331e-11	2.40417e-11	2.17998e-11	1.78733e-11	1.57648e-11	1.82366e-11	2.18637e-11
8.86	1.99915e-11	2.30429e-11	2.14806e-11	2.14806e-11	2.71233e-11	2.20014e-11	2.56023e-11	2.33832e-11	2.22305e-11	3.36409e-11	2.04225e-11	1.55725e-11	3.06037e-11	2.44092e-11	2.94499e-11	2.23852e-11	1.92347e-11	2.05459e-11	1.6239e-11	2.71735e-11	2.2753e-11	1.92019e-11	1.99298e-11	2.4039e-11	2.1792e-11	1.78813e-11	1.57625e-11	1.82338e-11	2.18616e-11
8.88	1.99883e-11	2.30455e-11	2.14785e-11	2.14785e-11	2.71287e-11	2.19976e-11	2.56033e-11	2.33786e-11	2.22312e-11	3.36516e-11	2.04254e-11	1.55728e-11	3.06101e-11	2.44086e-11	2.94522e-11	2.23863e-11	1.92307e-11	2.05446e-11	1.62293e-11	2.71611e-11	2.27434e-11	1.92007e-11	1.99282e-11	2.40419e-11	2.17897e-11	1.78792e-11	1.57589e-11	1.82353e-11	2.18589e-11
8.9	1.99858e-11	2.30543e-11	2.1477e-11	2.1477e-11	2.71205e-11	2.19944e-11	2.56096e-11	2.33773e-11	2.22326e-11	3.36485e-11	2.04225e-11	1.55693e-11	3.06086e-11	2.44068e-11	2.94589e-11	2.23877e-11	1.92272e-11	2.05436e-11	1.62397e-11	2.71573e-11	2.2745e-11	1.92043e-11	1.99286e-11	2.40443e-11	2.17916e-11	1.78783e-11	1.5764e-11	1.82296e-11	2.1858e-11
8.92	1.99865e-11	2.30468e-11	2.14755e-11	2.14755e-11	2.71247e-11	2.19921e-11	2.56037e-11	2.33798e-11	2.22324e-11	3.3647e-11	2.04228e-11	1.55677e-11	3.06129e-11	2.44078e-11	2.94569e-11	2.23908e-11	1.92267e-11	2.05384e-11	1.6234e-11	2.71995e-11	2.2745e-11	1.92011e-11	1.99333e-11	2.40429e-11	2.17933e-11	1.78861e-11	1.57756e-11	1.82314e-11	2.18578e-11
8.94	1.99914e-11	2.30459e-11	2.14828e-11	2.14828e-11	2.71275e-11	2.20006e-11	2.56096e-11	2.33812e-11	2.22292e-11	3.36397e-11	2.04223e-11	1.55741e-11	3.06073e-11	2.44081e-11	2.94576e-11	2.2389e-11	1.92292e-11	2.0533e-11	1.62271e-11	2.71803e-11	2.27461e-11	1.91955e-11	1.99322e-11	2.40438e-11	2.17944e-11	1.78833e-11	1.57696e-11	1.82309e-11	2.18634e-11
8.96	1.99951e-11	2.30427e-11	2.14831e-11	2.14831e-11	2.7129e-11	2.20028e-11	2.56027e-11	2.33734e-11	2.22302e-11	3.36417e-11	2.04224e-11	1.5566e-11	3.06083e-11	2.44107e-11	2.94589e-11	2.23904e-11	1.92263e-11	2.0536e-11	1.62138e-11	2.71826e-11	2.27438e-11	1.92e-11	1.99324e-11	2.40453e-11	2.17958e-11	1.78825e-11	1.57674e-11	1.82388e-11	2.18591e-11
8.98	1.99922e-11	2.30461e-11	2.14834e-11	2.14834e-11	2.71248e-11	2.19964e-11	2.56034e-11	2.337e-11	2.22323e-11	3.3647e-11	2.04198e-11	1.55678e-11	3.06092e-11	2.44018e-11	2.94546e-11	2.23834e-11	1.92283e-11	2.05407e-11	1.62276e-11	2.71528e-11	2.2744e-11	1.92057e-11	1.99333e-11	2.40417e-11	2.17968e-11	1.7888e-11	1.57724e-11	1.82339e-11	2.18632e-11
9	1.99846e-11	2.30417e-11	2.14777e-11	2.14777e-11	2.71259e-11	2.20025e-11	2.56081e-11	2.33699e-11	2.22282e-11	3.36513e-11	2.0417e-11	1.55693e-11	3.06054e-11	2.44094e-11	2.94558e-11	2.23868e-11	1.92326e-11	2.05468e-11	1.62251e-11	2.71827e-11	2.27428e-11	1.92038e-11	1.9934e-11	2.4041e-11	2.17999e-11	1.78811e-11	1.57691e-11	1.82351e-11	2.18552e-11
9.02	1.99906e-11	2.30418e-11	2.14789e-11	2.14789e-11	2.71249e-11	2.19984e-11	2.55967e-11	2.33682e-11	2.22315e-11	3.36476e-11	2.04165e-11	1.55675e-11	3.06095e-11	2.44073e-11	2.9456e-11	2.23809e-11	1.92275e-11	2.05396e-11	1.62262e-11	2.7151e-11	2.2743e-11	1.92048e-11	1.99311e-11	2.40406e-11	2.17974e-11	1.7882e-11	1.57726e-11	1.82368e-11	2.18565e-11
9.04	1.99869e-11	2.30426e-11	2.14801e-11	2.14801e-11	2.71215e-11	2.19944e-11	2.5599e-11	2.33667e-11	2.22306e-11	3.36141e-11	2.04217e-11	1.55691e-11	3.0613e-11	2.44092e-11	2.94567e-11	2.2386e-11	1.92284e-11	2.05438e-11	1.62294e-11	2.71713e-11	2.27474e-11	1.921e-11	1.99354e-11	2.4033e-11	2.17986e-11	1.78648e-11	1.5761e-11	1.82365e-11	2.18626e-11
9.06	1.9994e-11	2.30466e-11	2.14796e-11	2.14796e-11	2.71243e-11	2.20031e-11	2.55992e-11	2.33615e-11	2.22291e-11	3.36519e-11	2.04351e-11	1.55683e-11	3.06119e-11	2.44113e-11	2.94555e-11	2.2389e-11	1.92344e-11	2.05405e-11	1.62223e-11	2.71536e-11	2.27504e-11	1.92026e-11	1.99299e-11	2.40406e-11	2.17981e-11	1.78726e-11	1.57697e-11	1.82347e-11	2.18553e-11
9.08	1.9997e-11	2.30484e-11	2.14809e-11	2.14809e-11	2.71184e-11	2.20029e-11	2.55999e-11	2.3362e-11	2.22308e-11	3.36531e-11	2.04221e-11	1.55675e-11	3.06146e-11	2.44027e-11	2.94523e-11	2.23873e-11	1.92282e-11	2.05426e-11	1.62202e-11	2.71612e-11	2.27454e-11	1.92012e-11	1.99345e-11	2.40415e-11	2.17898e-11	1.78792e-11	1.57689e-11	1.82389e-11	2.18614e-11
9.1	1.99936e-11	2.30526e-11	2.14853e-11	2.14853e-11	2.71249e-11	2.19998e-11	2.56002e-11	2.33658e-11	2.22296e-11	3.36459e-11	2.04175e-11	1.55679e-11	3.06125e-11	2.44047e-11	2.94553e-11	2.23852e-11	1.92277e-11	2.05476e-11	1.62221e-11	2.71232e-11	2.27466e-11	1.92034e-11	1.99356e-11	2.40412e-11	2.17969e-11	1.78822e-11	1.57623e-11	1.82376e-11	2.1856e-11
9.12	1.99948e-11	2.30447e-11	2.14834e-11	2.14834e-11	2.71235e-11	2.19961e-11	2.56011e-11	2.33621e-11	2.22285e-11	3.36208e-11	2.04268e-11	1.55712e-11	3.06079e-11	2.44091e-11	2.94558e-11	2.23884e-11	1.92326e-11	2.05465e-11	1.62272e-11	2.71707e-11	2.27506e-11	1.9209e-11	1.99327e-11	2.40451e-11	2.1791e-11	1.78845e-11	1.57727e-11	1.82342e-11	2.18581e-11
9.14	1.99866e-11	2.30507e-11	2.1484e-11	2.1484e-11	2.71219e-11	2.20055e-11	2.55993e-11	2.33664e-11	2.22307e-11	3.35621e-11	2.04131e-11	1.55693e-11	3.0614e-11	2.44091e-11	2.94577e-11	2.23906e-11	1.92291e-11	2.05449e-11	1.62202e-11	2.71664e-11	2.27551e-11	1.92021e-11	1.99293e-11	2.40447e-11	2.17978e-11	1.78726e-11	1.57609e-11	1.8233e-11	2.18576e-11
9.16	1.99953e-11	2.30516e-11	2.1483e-11	2.1483e-11	2.71185e-11	2.19991e-11	2.56007e-11	2.33581e-11	2.22288e-11	3.34861e-11	2.03823e-11	1.55681e-11	3.06084e-11	2.44084e-11	2.94598e-11	2.23875e-11	1.92274e-11	2.05527e-11	1.62258e-11	2.71512e-11	2.27533e-11	1.92046e-11	1.99291e-11	2.40435e-11	2.17861e-11	1.78684e-11	1.57703e-11	1.8239e-11	2.18524e-11
9.18	1.99898e-11	2.30463e-11	2.14821e-11	2.14821e-11	2.71239e-11	2.2e-11	2.56042e-11	2.33566e-11	2.22336e-11	3.3427e-11	2.03432e-11	1.55699e-11	3.06122e-11	2.44092e-11	2.94547e-11	2.23862e-11	1.92304e-11	2.05436e-11	1.62235e-11	2.70963e-11	2.27487e-11	1.91977e-11	1.99309e-11	2.40413e-11	2.17882e-11	1.78815e-11	1.57813e-11	1.82303e-11	2.18543e-11
9.2	1.99958e-11	2.30465e-11	2.14879e-11	2.14879e-11	2.71196e-11	2.20023e-11	2.5599e-11	2.33553e-11	2.22305e-11	3.3371e-11	2.02936e-11	1.55697e-11	3.06154e-11	2.4413e-11	2.94608e-11	2.23842e-11	1.92304e-11	2.05442e-11	1.6225e-11	2.71166e-11	2.27419e-11	1.92001e-11	1.99273e-11	2.40384e-11	2.17913e-11	1.78694e-11	1.57692e-11	1.82355e-11	2.18563e-11
9.22	1.99923e-11	2.30483e-11	2.14851e-11	2.14851e-11	2.71206e-11	2.20007e-11	2.5604e-11	2.33585e-11	2.22237e-11	3.33197e-11	2.02461e-11	1.55696e-11	3.06104e-11	2.44042e-11	2.94539e-11	2.23845e-11	1.92321e-11	2.05461e-11	1.62186e-11	2.71386e-11	2.27522e-11	1.92023e-11	1.99306e-11	2.40476e-11	2.17876e-11	1.78762e-11	1.57741e-11	1.82289e-11	2.18515e-11
9.24	1.99964e-11	2.3047e-11	2.14827e-11	2.14827e-11	2.71231e-11	2.20028e-11	2.55983e-11	2.33574e-11	2.22239e-11	3.328e-11	2.02007e-11	1.55755e-11	3.06049e-11	2.44066e-11	2.94592e-11	2.23863e-11	1.92324e-11	2.05474e-11	1.62198e-11	2.71306e-11	2.27507e-11	1.92064e-11	1.99344e-11	2.40442e-11	2.1798e-11	1.78585e-11	1.57666e-11	1.82291e-11	2.1855e-11
9.26	1.99972e-11	2.30429e-11	2.14809e-11	2.14809e-11	2.71191e-11	2.19919e-11	2.5605e-11	2.33519e-11	2.2235e-11	3.32542e-11	2.01636e-11	1.55757e-11	3.06158e-11	2.44053e-11	2.94559e-11	2.23862e-11	1.92307e-11	2.05384e-11	1.62342e-11	2.71087e-11	2.27534e-11	1.91946e-11	1.99328e-11	2.40464e-11	2.17917e-11	1.78719e-11	1.57632e-11	1.82341e-11	2.18652e-11
9.28	1.99956e-11	2.30452e-11	2.14833e-11	2.14833e-11	2.7125e-11	2.20039e-11	2.56019e-11	2.33596e-11	2.22311e-11	3.3229e-11	2.01295e-11	1.55672e-11	3.0609e-11	2.44066e-11	2.94572e-11	2.23876e-11	1.92278e-11	2.05407e-11	1.6218e-11	2.71546e-11	2.27495e-11	1.91953e-11	1.99294e-11	2.40468e-11	2.1795e-11	1.78634e-11	1.57693e-11	1.82343e-11	2.18477e-11
9.3	1.99901e-11	2.30557e-11	2.14866e-11	2.14866e-11	2.71278e-11	2.19967e-11	2.56032e-11	2.33481e-11	2.22311e-11	3.3216e-11	2.0104e-11	1.55658e-11	3.06151e-11	2.4406e-11	2.94554e-11	2.23852e-11	1.92323e-11	2.05445e-11	1.62295e-11	2.71083e-11	2.27512e-11	1.9198e-11	1.99314e-11	2.40425e-11	2.17842e-11	1.78652e-11	1.57786e-11	1.82313e-11	2.18538e-11
9.32	1.99862e-11	2.30476e-11	2.14816e-11	2.14816e-11	2.7124e-11	2.19945e-11	2.5601e-11	2.33527e-11	2.22276e-11	3.3204e-11	2.00775e-11	1.55627e-11	3.06105e-11	2.44035e-11	2.94616e-11	2.23907e-11	1.92283e-11	2.05458e-11	1.62274e-11	2.71184e-11	2.27503e-11	1.92048e-11	1.99253e-11	2.40455e-11	2.17946e-11	1.78597e-11	1.57535e-11	1.82388e-11	2.18533e-11
9.34	1.99995e-11	2.30487e-11	2.14839e-11	2.14839e-11	2.71237e-11	2.19957e-11	2.56001e-11	2.33492e-11	2.22253e-11	3.31933e-11	2.00641e-11	1.5563e-11	3.06107e-11	2.44096e-11	2.94584e-11	2.23907e-11	1.92247e-11	2.05422e-11	1.62312e-11	2.71122e-11	2.27528e-11	1.92064e-11	1.99319e-11	2.40428e-11	2.17949e-11	1.78612e-11	1.57623e-11	1.824e-11	2.18511e-11
9.36	1.99942e-11	2.30539e-11	2.14816e-11	2.14816e-11	2.71271e-11	2.20008e-11	2.55989e-11	2.33485e-11	2.22279e-11	3.31741e-11	2.00518e-11	1.55752e-11	3.06104e-11	2.44116e-11	2.9455e-11	2.23898e-11	1.92215e-11	2.0545e-11	1.62247e-11	2.71198e-11	2.27502e-11	1.92046e-11	1.99368e-11	2.40503e-11	2.17926e-11	1.78736e-11	1.57633e-11	1.82328e-11	2.18484e-11
9.38	1.99934e-11	2.30459e-11	2.14855e-11	2.14855e-11	2.71256e-11	2.19896e-11	2.56021e-11	2.33507e-11	2.22299e-11	3.31749e-11	2.00349e-11	1.5572e-11	3.0608e-11	2.44081e-11	2.94577e-11	2.23898e-11	1.92312e-11	2.05374e-11	1.62183e-11	2.71102e-11	2.27473e-11	1.92018e-11	1.99309e-11	2.404e-11	2.17943e-11	1.78709e-11	1.57554e-11	1.82374e-11	2.18539e-11
9.4	1.99919e-11	2.30479e-11	2.14869e-11	2.14869e-11	2.71239e-11	2.19999e-11	2.56005e-11	2.33426e-11	2.22285e-11	3.31687e-11	2.00347e-11	1.55695e-11	3.06091e-11	2.44073e-11	2.94555e-11	2.23881e-11	1.92296e-11	2.05333e-11	1.62131e-11	2.71077e-11	2.27549e-11	1.92004e-11	1.99279e-11	2.40432e-11	2.18008e-11	1.78626e-11	1.57598e-11	1.82354e-11	2.18513e-11
9.42	1.99954e-11	2.30445e-11	2.14826e-11	2.14826e-11	2.71227e-11	2.19995e-11	2.55983e-11	2.33457e-11	2.22307e-11	3.31649e-11	2.00307e-11	1.55722e-11	3.06092e-11	2.44031e-11	2.9452e-11	2.23871e-11	1.92301e-11	2.05258e-11	1.62251e-11	2.71101e-11	2.27543e-11	1.92006e-11	1.9932e-11	2.40384e-11	2.17906e-11	1.78653e-11	1.57621e-11	1.82371e-11	2.18613e-11
9.44	1.99924e-11	2.30518e-11	2.14809e-11	2.14809e-11	2.71287e-11	2.19937e-11	2.5601e-11	2.33466e-11	2.22276e-11	3.31597e-11	2.00154e-11	1.55658e-11	3.06085e-11	2.44046e-11	2.94616e-11	2.23895e-11	1.92256e-11	2.05331e-11	1.62203e-11	2.71091e-11	2.27558e-11	1.9203e-11	1.99368e-11	2.4036e-11	2.17943e-11	1.78702e-11	1.57746e-11	1.82369e-11	2.18538e-11
9.46	1.99963e-11	2.30388e-11	2.14879e-11	2.14879e-11	2.71274e-11	2.19972e-11	2.55976e-11	2.3339e-11	2.22268e-11	3.31574e-11	2.00229e-11	1.55726e-11	3.06059e-11	2.44056e-11	2.94591e-11	2.23865e-11	1.92288e-11	2.05284e-11	1.62241e-11	2.71228e-11	2.27484e-11	1.92069e-11	1.99298e-11	2.40414e-11	2.17945e-11	1.78719e-11	1.57682e-11	1.82325e-11	2.18532e-11
9.48	1.99942e-11	2.30421e-11	2.14796e-11	2.14796e-11	2.71198e-11	2.19948e-11	2.56014e-11	2.33414e-11	2.22282e-11	3.31589e-11	2.00179e-11	1.55728e-11	3.06113e-11	2.44077e-11	2.94651e-11	2.23877e-11	1.92277e-11	2.05308e-11	1.62333e-11	2.70982e-11	2.27495e-11	1.9201e-11	1.99373e-11	2.40471e-11	2.17942e-11	1.78734e-11	1.57655e-11	1.82381e-11	2.1858e-11
9.5	1.99953e-11	2.30474e-11	2.14813e-11	2.14813e-11	2.71234e-11	2.19984e-11	2.55965e-11	2.33326e-11	2.22247e-11	3.31539e-11	2.00104e-11	1.55697e-11	3.06074e-11	2.44047e-11	2.94633e-11	2.23861e-11	1.92289e-11	2.0531e-11	1.62274e-11	2.71251e-11	2.27522e-11	1.92044e-11	1.99374e-11	2.40419e-11	2.17937e-11	1.78874e-11	1.57674e-11	1.82355e-11	2.18533e-11
9.52	1.99905e-11	2.30471e-11	2.14851e-11	2.14851e-11	2.7125e-11	2.1999e-11	2.55949e-11	2.33421e-11	2.22232e-11	3.31512e-11	2.00069e-11	1.55693e-11	3.06141e-11	2.44041e-11	2.9463e-11	2.23852e-11	1.92314e-11	2.05362e-11	1.62186e-11	2.71249e-11	2.27573e-11	1.92056e-11	1.9934e-11	2.40451e-11	2.17863e-11	1.78766e-11	1.57688e-11	1.82429e-11	2.1857e-11
9.54	1.99969e-11	2.30468e-11	2.14841e-11	2.14841e-11	2.7123e-11	2.19956e-11	2.56033e-11	2.33352e-11	2.22248e-11	3.31484e-11	1.99987e-11	1.55656e-11	3.06066e-11	2.44042e-11	2.94593e-11	2.23882e-11	1.92287e-11	2.05423e-11	1.62302e-11	2.70851e-11	2.27563e-11	1.92047e-11	1.99369e-11	2.40378e-11	2.17943e-11	1.7873e-11	1.57744e-11	1.82283e-11	2.18533e-11
9.56	1.99954e-11	2.30483e-11	2.14797e-11	2.14797e-11	2.71194e-11	2.1995e-11	2.56036e-11	2.33313e-11	2.22244e-11	3.31392e-11	2.00044e-11	1.55686e-11	3.06126e-11	2.44075e-11	2.94571e-11	2.23847e-11	1.92286e-11	2.05377e-11	1.62341e-11	2.70864e-11	2.27489e-11	1.92079e-11	1.99314e-11	2.40379e-11	2.17904e-11	1.78732e-11	1.57724e-11	1.82355e-11	2.18575e-11
9.58	1.9996e-11	2.30428e-11	2.14806e-11	2.14806e-11	2.71247e-11	2.19954e-11	2.5602e-11	2.33371e-11	2.22266e-11	3.31474e-11	2.0001e-11	1.5568e-11	3.0611e-11	2.44091e-11	2.94557e-11	2.23882e-11	1.92303e-11	2.05414e-11	1.6225e-11	2.70827e-11	2.27468e-11	1.92057e-11	1.99354e-11	2.40411e-11	2.17929e-11	1.78657e-11	1.57666e-11	1.82367e-11	2.18528e-11
9.6	1.99911e-11	2.30459e-11	2.14847e-11	2.14847e-11	2.71261e-11	2.20005e-11	2.56036e-11	2.33341e-11	2.22299e-11	3.31431e-11	1.99959e-11	1.55706e-11	3.06056e-11	2.44076e-11	2.94612e-11	2.23891e-11	1.92343e-11	2.05436e-11	1.62145e-11	2.7079e-11	2.27605e-11	1.92008e-11	1.99346e-11	2.40419e-11	2.18e-11	1.78765e-11	1.57722e-11	1.82421e-11	2.18509e-11
9.62	1.99932e-11	2.30551e-11	2.14789e-11	2.14789e-11	2.71258e-11	2.19961e-11	2.55977e-11	2.33337e-11	2.22292e-11	3.31415e-11	1.99954e-11	1.55693e-11	3.06089e-11	2.44115e-11	2.94642e-11	2.23833e-11	1.92278e-11	2.05469e-11	1.62269e-11	2.70978e-11	2.27587e-11	1.92006e-11	1.99348e-11	2.4045e-11	2.17915e-11	1.78713e-11	1.57583e-11	1.82327e-11	2.18541e-11
9.64	1.99994e-11	2.30506e-11	2.14888e-11	2.14888e-11	2.71225e-11	2.19951e-11	2.55984e-11	2.33331e-11	2.22254e-11	3.31383e-11	1.99911e-11	1.5566e-11	3.06136e-11	2.44113e-11	2.94613e-11	2.23878e-11	1.92351e-11	2.05466e-11	1.62239e-11	2.70499e-11	2.27594e-11	1.92029e-11	1.99346e-11	2.40396e-11	2.17959e-11	1.78716e-11	1.57664e-11	1.82377e-11	2.18552e-11
9.66	1.99954e-11	2.30443e-11	2.14836e-11	2.14836e-11	2.71247e-11	2.20004e-11	2.56015e-11	2.33328e-11	2.22276e-11	3.31403e-11	1.99963e-11	1.55682e-11	3.06172e-11	2.44077e-11	2.94651e-11	2.23877e-11	1.92338e-11	2.05351e-11	1.62252e-11	2.70958e-11	2.27651e-11	1.92018e-11	1.9933e-11	2.40462e-11	2.1792e-11	1.78808e-11	1.57715e-11	1.82299e-11	2.18541e-11
9.68	1.99972e-11	2.30539e-11	2.14848e-11	2.14848e-11	2.71234e-11	2.19922e-11	2.56018e-11	2.3328e-11	2.22261e-11	3.31396e-11	1.99932e-11	1.55699e-11	3.06043e-11	2.44057e-11	2.94585e-11	2.23864e-11	1.92324e-11	2.05397e-11	1.62311e-11	2.70727e-11	2.27491e-11	1.92011e-11	1.99332e-11	2.4045e-11	2.17978e-11	1.78753e-11	1.57638e-11	1.82341e-11	2.1855e-11
9.7	1.9991e-11	2.30423e-11	2.14846e-11	2.14846e-11	2.71259e-11	2.19939e-11	2.56019e-11	2.33272e-11	2.22276e-11	3.31406e-11	1.99934e-11	1.55725e-11	3.06137e-11	2.44003e-11	2.94624e-11	2.23904e-11	1.92255e-11	2.05382e-11	1.62314e-11	2.70814e-11	2.27475e-11	1.92045e-11	1.99322e-11	2.40423e-11	2.17955e-11	1.78678e-11	1.57816e-11	1.823e-11	2.1854e-11
9.72	1.9999e-11	2.30442e-11	2.14831e-11	2.14831e-11	2.71244e-11	2.20011e-11	2.56059e-11	2.33259e-11	2.22284e-11	3.31416e-11	1.99975e-11	1.55682e-11	3.06107e-11	2.44042e-11	2.94628e-11	2.23869e-11	1.92271e-11	2.05496e-11	1.62337e-11	2.70718e-11	2.2749e-11	1.92042e-11	1.99333e-11	2.40437e-11	2.17984e-11	1.78701e-11	1.5761e-11	1.82333e-11	2.18576e-11
9.74	1.99946e-11	2.30448e-11	2.14845e-11	2.14845e-11	2.71234e-11	2.19919e-11	2.56007e-11	2.3324e-11	2.22259e-11	3.31377e-11	1.99905e-11	1.55685e-11	3.06134e-11	2.44071e-11	2.94654e-11	2.23848e-11	1.92324e-11	2.05455e-11	1.62408e-11	2.7096e-11	2.2754e-11	1.92069e-11	1.99374e-11	2.4042e-11	2.17932e-11	1.78591e-11	1.57589e-11	1.82378e-11	2.185e-11
9.76	1.99975e-11	2.30419e-11	2.1485e-11	2.1485e-11	2.7127e-11	2.19988e-11	2.56056e-11	2.33224e-11	2.22279e-11	3.31397e-11	1.9994e-11	1.55718e-11	3.06111e-11	2.44083e-11	2.94629e-11	2.23794e-11	1.92358e-11	2.05447e-11	1.62359e-11	2.7087e-11	2.27522e-11	1.92006e-11	1.99302e-11	2.40345e-11	2.17907e-11	1.78588e-11	1.57651e-11	1.82411e-11	2.18509e-11
9.78	1.99973e-11	2.3042e-11	2.14826e-11	2.14826e-11	2.71272e-11	2.19943e-11	2.5604e-11	2.3324e-11	2.22317e-11	3.31326e-11	1.99906e-11	1.55663e-11	3.06116e-11	2.44063e-11	2.94595e-11	2.23847e-11	1.92324e-11	2.05411e-11	1.62431e-11	2.71021e-11	2.27488e-11	1.92041e-11	1.99351e-11	2.40398e-11	2.17906e-11	1.78623e-11	1.57562e-11	1.82379e-11	2.1853e-11
9.8	1.99871e-11	2.30454e-11	2.14808e-11	2.14808e-11	2.71201e-11	2.19979e-11	2.56006e-11	2.3323e-11	2.22307e-11	3.31347e-11	1.99934e-11	1.55729e-11	3.06149e-11	2.44027e-11	2.94682e-11	2.23837e-11	1.92301e-11	2.05429e-11	1.62239e-11	2.70661e-11	2.27559e-11	1.92033e-11	1.99339e-11	2.4042e-11	2.17929e-11	1.78622e-11	1.57767e-11	1.82335e-11	2.18498e-11
9.82	1.99873e-11	2.3044e-11	2.14847e-11	2.14847e-11	2.71212e-11	2.19984e-11	2.55976e-11	2.33246e-11	2.22326e-11	3.3136e-11	1.99914e-11	1.55692e-11	3.06132e-11	2.44082e-11	2.9462e-11	2.23828e-11	1.9231e-11	2.05402e-11	1.6225e-11	2.70405e-11	2.27602e-11	1.92029e-11	1.99328e-11	2.40434e-11	2.17995e-11	1.78663e-11	1.57607e-11	1.82352e-11	2.18508e-11
9.84	1.99899e-11	2.30451e-11	2.14845e-11	2.14845e-11	2.71206e-11	2.19992e-11	2.561e-11	2.33194e-11	2.22226e-11	3.31335e-11	1.99973e-11	1.55631e-11	3.06147e-11	2.44024e-11	2.94678e-11	2.23877e-11	1.92294e-11	2.05506e-11	1.62251e-11	2.70681e-11	2.2757e-11	1.92035e-11	1.99301e-11	2.40364e-11	2.17946e-11	1.78617e-11	1.57659e-11	1.82307e-11	2.18586e-11
9.86	1.9993e-11	2.305e-11	2.14854e-11	2.14854e-11	2.71211e-11	2.19973e-11	2.56052e-11	2.33227e-11	2.22281e-11	3.31341e-11	1.99906e-11	1.55688e-11	3.06096e-11	2.44088e-11	2.94617e-11	2.23909e-11	1.92321e-11	2.05352e-11	1.62289e-11	2.70782e-11	2.27493e-11	1.92015e-11	1.99333e-11	2.40462e-11	2.17967e-11	1.7871e-11	1.57634e-11	1.82303e-11	2.18566e-11
9.88	1.99923e-11	2.30412e-11	2.14836e-11	2.14836e-11	2.71199e-11	2.19966e-11	2.56082e-11	2.33217e-11	2.22282e-11	3.31377e-11	1.99923e-11	1.5569e-11	3.06126e-11	2.44055e-11	2.94619e-11	2.23918e-11	1.92279e-11	2.05447e-11	1.62281e-11	2.70701e-11	2.27581e-11	1.92019e-11	1.9933e-11	2.40384e-11	2.17971e-11	1.78637e-11	1.57653e-11	1.82378e-11	2.18547e-11
9.9	1.99924e-11	2.30396e-11	2.14838e-11	2.14838e-11	2.71244e-11	2.19954e-11	2.56053e-11	2.33205e-11	2.22224e-11	3.3136e-11	1.99894e-11	1.55745e-11	3.06164e-11	2.44076e-11	2.94636e-11	2.23853e-11	1.92248e-11	2.0536e-11	1.62375e-11	2.70456e-11	2.27562e-11	1.92024e-11	1.99305e-11	2.40364e-11	2.17962e-11	1.78692e-11	1.57611e-11	1.82361e-11	2.18463e-11
9.92	1.99939e-11	2.30465e-11	2.1486e-11	2.1486e-11	2.71239e-11	2.19944e-11	2.5604e-11	2.33211e-11	2.22317e-11	3.31353e-11	1.9987e-11	1.5569e-11	3.06077e-11	2.44111e-11	2.94646e-11	2.23827e-11	1.92275e-11	2.05461e-11	1.62345e-11	2.70658e-11	2.27499e-11	1.92046e-11	1.99339e-11	2.40418e-11	2.1794e-11	1.78566e-11	1.57638e-11	1.8237e-11	2.18543e-11
9.94	1.99913e-11	2.30427e-11	2.14816e-11	2.14816e-11	2.71218e-11	2.1998e-11	2.56101e-11	2.33224e-11	2.22261e-11	3.31381e-11	1.99926e-11	1.55682e-11	3.06126e-11	2.44025e-11	2.94642e-11	2.23891e-11	1.92343e-11	2.05457e-11	1.62399e-11	2.70637e-11	2.27491e-11	1.92049e-11	1.9934e-11	2.40445e-11	2.17944e-11	1.78643e-11	1.57562e-11	1.82313e-11	2.1856e-11
9.96	1.99966e-11	2.30467e-11	2.14841e-11	2.14841e-11	2.71289e-11	2.19969e-11	2.56071e-11	2.33196e-11	2.22281e-11	3.31342e-11	1.9988e-11	1.55694e-11	3.06116e-11	2.44004e-11	2.94608e-11	2.23902e-11	1.92313e-11	2.05465e-11	1.62384e-11	2.70653e-11	2.27523e-11	1.92022e-11	1.99365e-11	2.40412e-11	2.17953e-11	1.78585e-11	1.57656e-11	1.82388e-11	2.18635e-11
9.98	1.99953e-11	2.30429e-11	2.14851e-11	2.14851e-11	2.7125e-11	2.19976e-11	2.55988e-11	2.33208e-11	2.2226e-11	3.3132e-11	1.99868e-11	1.55683e-11	3.06132e-11	2.44035e-11	2.94681e-11	2.23848e-11	1.92329e-11	2.05449e-11	1.62386e-11	2.70048e-11	2.27531e-11	1.92004e-11	1.99359e-11	2.40466e-11	2.17939e-11	1.7856e-11	1.57604e-11	1.8239e-11	2.18453e-11
10	1.99905e-11	2.30499e-11	2.14803e-11	2.14803e-11	2.71202e-11	2.19919e-11	2.56075e-11	2.33166e-11	2.22316e-11	3.31333e-11	1.99887e-11	1.55658e-11	3.06077e-11	2.44061e-11	2.94635e-11	2.23888e-11	1.92312e-11	2.0546e-11	1.62317e-11	2.70585e-11	2.27454e-11	1.92053e-11	1.99318e-11	2.40412e-11	2.1797e-11	1.78527e-11	1.57693e-11	1.82304e-11	2.18506e-11
10.02	1.99967e-11	2.3045e-11	2.14871e-11	2.14871e-11	2.71239e-11	2.19986e-11	2.5608e-11	2.33158e-11	2.2231e-11	3.31324e-11	1.9989e-11	1.5567e-11	3.06071e-11	2.4404e-11	2.94664e-11	2.23875e-11	1.92356e-11	2.05482e-11	1.62232e-11	2.70608e-11	2.27416e-11	1.92032e-11	1.99317e-11	2.40438e-11	2.17989e-11	1.78515e-11	1.57597e-11	1.82351e-11	2.18526e-11
10.04	1.99847e-11	2.30501e-11	2.14798e-11	2.14798e-11	2.71279e-11	2.19943e-11	2.56021e-11	2.33147e-11	2.22257e-11	3.31353e-11	1.99837e-11	1.55687e-11	3.06093e-11	2.44067e-11	2.94652e-11	2.23894e-11	1.9233e-11	2.05471e-11	1.62257e-11	2.70374e-11	2.27548e-11	1.9205e-11	1.9932e-11	2.40458e-11	2.1792e-11	1.78601e-11	1.57565e-11	1.82308e-11	2.1851e-11
10.06	1.99925e-11	2.30497e-11	2.14826e-11	2.14826e-11	2.71244e-11	2.19916e-11	2.5608e-11	2.33144e-11	2.22304e-11	3.31356e-11	1.99877e-11	1.55676e-11	3.06137e-11	2.4405e-11	2.94648e-11	2.23828e-11	1.92354e-11	2.05546e-11	1.62277e-11	2.70453e-11	2.27515e-11	1.9206e-11	1.99295e-11	2.40438e-11	2.17947e-11	1.78566e-11	1.57689e-11	1.82375e-11	2.18629e-11
10.08	1.99897e-11	2.30444e-11	2.14875e-11	2.14875e-11	2.71261e-11	2.19897e-11	2.56037e-11	2.33109e-11	2.2226e-11	3.31326e-11	1.99885e-11	1.55719e-11	3.06127e-11	2.44071e-11	2.94644e-11	2.23859e-11	1.92289e-11	2.05442e-11	1.62267e-11	2.70229e-11	2.27491e-11	1.91993e-11	1.99359e-11	2.40509e-11	2.17951e-11	1.78584e-11	1.576e-11	1.82328e-11	2.18641e-11
10.1	1.99963e-11	2.30426e-11	2.14843e-11	2.14843e-11	2.71264e-11	2.1993e-11	2.56025e-11	2.33077e-11	2.2227e-11	3.3133e-11	1.99894e-11	1.55671e-11	3.06104e-11	2.44056e-11	2.94668e-11	2.23903e-11	1.92326e-11	2.05436e-11	1.62365e-11	2.70571e-11	2.2748e-11	1.92062e-11	1.99339e-11	2.40446e-11	2.1796e-11	1.78526e-11	1.57674e-11	1.82367e-11	2.18564e-11
10.12	1.99995e-11	2.30476e-11	2.1488e-11	2.1488e-11	2.71177e-11	2.19942e-11	2.56011e-11	2.33111e-11	2.22253e-11	3.31292e-11	1.99907e-11	1.557e-11	3.06125e-11	2.44044e-11	2.94643e-11	2.23891e-11	1.92349e-11	2.05438e-11	1.62355e-11	2.70423e-11	2.27471e-11	1.92078e-11	1.99325e-11	2.40409e-11	2.18008e-11	1.78798e-11	1.57701e-11	1.82322e-11	2.18595e-11
10.14	1.99946e-11	2.30512e-11	2.14836e-11	2.14836e-11	2.71247e-11	2.19956e-11	2.55978e-11	2.33074e-11	2.22322e-11	3.31375e-11	1.99839e-11	1.55721e-11	3.06112e-11	2.44077e-11	2.94644e-11	2.23888e-11	1.92346e-11	2.05514e-11	1.62249e-11	2.70559e-11	2.27486e-11	1.92062e-11	1.99311e-11	2.40508e-11	2.17869e-11	1.78776e-11	1.57738e-11	1.8238e-11	2.18662e-11
10.16	1.9994e-11	2.3043e-11	2.14846e-11	2.14846e-11	2.71232e-11	2.19878e-11	2.56004e-11	2.33105e-11	2.22301e-11	3.31262e-11	1.99851e-11	1.55729e-11	3.06126e-11	2.44027e-11	2.94606e-11	2.2386e-11	1.92304e-11	2.05502e-11	1.62269e-11	2.7033e-11	2.27483e-11	1.92054e-11	1.99334e-11	2.40445e-11	2.17935e-11	1.78688e-11	1.57588e-11	1.82373e-11	2.18547e-11
10.18	1.99939e-11	2.30478e-11	2.14855e-11	2.14855e-11	2.71264e-11	2.19851e-11	2.56022e-11	2.33089e-11	2.22267e-11	3.31351e-11	1.99904e-11	1.55725e-11	3.06142e-11	2.44044e-11	2.94592e-11	2.23883e-11	1.92289e-11	2.05488e-11	1.62289e-11	2.70425e-11	2.27525e-11	1.92037e-11	1.99323e-11	2.40406e-11	2.17951e-11	1.78661e-11	1.57514e-11	1.82353e-11	2.18606e-11
10.2	1.99903e-11	2.30445e-11	2.14836e-11	2.14836e-11	2.71313e-11	2.19897e-11	2.55958e-11	2.33079e-11	2.22316e-11	3.31382e-11	1.99868e-11	1.55634e-11	3.06073e-11	2.44096e-11	2.94622e-11	2.23897e-11	1.92263e-11	2.05425e-11	1.62307e-11	2.70726e-11	2.27518e-11	1.9204e-11	1.99377e-11	2.40419e-11	2.17952e-11	1.78659e-11	1.57701e-11	1.82335e-11	2.18612e-11
10.22	1.99979e-11	2.30459e-11	2.14896e-11	2.14896e-11	2.71225e-11	2.1978e-11	2.56031e-11	2.3307e-11	2.22299e-11	3.31307e-11	1.99858e-11	1.55694e-11	3.06126e-11	2.44089e-11	2.94619e-11	2.2387e-11	1.92307e-11	2.05543e-11	1.62295e-11	2.70343e-11	2.27565e-11	1.92062e-11	1.99335e-11	2.40451e-11	2.17935e-11	1.78705e-11	1.57694e-11	1.82398e-11	2.18522e-11
10.24	1.99907e-11	2.30459e-11	2.14803e-11	2.14803e-11	2.71197e-11	2.19868e-11	2.55994e-11	2.33068e-11	2.22274e-11	3.31324e-11	1.99848e-11	1.55728e-11	3.06139e-11	2.44055e-11	2.94625e-11	2.23951e-11	1.92354e-11	2.05541e-11	1.62372e-11	2.70163e-11	2.27454e-11	1.92025e-11	1.99358e-11	2.40452e-11	2.17894e-11	1.78592e-11	1.57613e-11	1.82355e-11	2.18542e-11
10.26	1.99946e-11	2.30424e-11	2.14791e-11	2.14791e-11	2.7124e-11	2.19815e-11	2.56013e-11	2.33088e-11	2.22358e-11	3.31221e-11	1.99899e-11	1.55693e-11	3.06136e-11	2.44094e-11	2.94588e-11	2.23872e-11	1.9229e-11	2.05499e-11	1.623e-11	2.70527e-11	2.27462e-11	1.92011e-11	1.99345e-11	2.40399e-11	2.17853e-11	1.78579e-11	1.57587e-11	1.82333e-11	2.18569e-11
10.28	1.99913e-11	2.30412e-11	2.14858e-11	2.14858e-11	2.7119e-11	2.1994e-11	2.56004e-11	2.33053e-11	2.22334e-11	3.31373e-11	1.99869e-11	1.55706e-11	3.06136e-11	2.44086e-11	2.946e-11	2.239e-11	1.92335e-11	2.05549e-11	1.62252e-11	2.70437e-11	2.27537e-11	1.91984e-11	1.99374e-11	2.40427e-11	2.17993e-11	1.78822e-11	1.57641e-11	1.82373e-11	2.18602e-11
10.3	1.99937e-11	2.3043e-11	2.14851e-11	2.14851e-11	2.7125e-11	2.19905e-11	2.55949e-11	2.3302e-11	2.22334e-11	3.3133e-11	1.99875e-11	1.5566e-11	3.06165e-11	2.44072e-11	2.94646e-11	2.23891e-11	1.92306e-11	2.05448e-11	1.62237e-11	2.70295e-11	2.27496e-11	1.92044e-11	1.99367e-11	2.40348e-11	2.17942e-11	1.78735e-11	1.57669e-11	1.82355e-11	2.18567e-11
10.32	1.99975e-11	2.30385e-11	2.1488e-11	2.1488e-11	2.7125e-11	2.19943e-11	2.56002e-11	2.33011e-11	2.22307e-11	3.31312e-11	1.99899e-11	1.5569e-11	3.06021e-11	2.44032e-11	2.94579e-11	2.23855e-11	1.92319e-11	2.05445e-11	1.6238e-11	2.7039e-11	2.27536e-11	1.92048e-11	1.99323e-11	2.40425e-11	2.17986e-11	1.78687e-11	1.57646e-11	1.82372e-11	2.18533e-11
10.34	1.99901e-11	2.30435e-11	2.14812e-11	2.14812e-11	2.71198e-11	2.19923e-11	2.56044e-11	2.32983e-11	2.22263e-11	3.31376e-11	1.99867e-11	1.55637e-11	3.0613e-11	2.44062e-11	2.94532e-11	2.239e-11	1.92251e-11	2.05443e-11	1.62337e-11	2.70279e-11	2.27551e-11	1.92056e-11	1.99334e-11	2.40422e-11	2.18004e-11	1.78688e-11	1.57705e-11	1.82344e-11	2.18587e-11
10.36	1.99966e-11	2.30431e-11	2.14848e-11	2.14848e-11	2.71242e-11	2.19911e-11	2.5599e-11	2.33005e-11	2.22332e-11	3.31356e-11	1.99886e-11	1.55724e-11	3.06127e-11	2.44061e-11	2.94621e-11	2.23919e-11	1.92351e-11	2.0559e-11	1.62213e-11	2.70291e-11	2.27503e-11	1.92023e-11	1.99332e-11	2.40391e-11	2.17915e-11	1.78762e-11	1.5768e-11	1.82349e-11	2.18555e-11
10.38	1.99931e-11	2.30401e-11	2.14852e-11	2.14852e-11	2.71254e-11	2.1995e-11	2.55995e-11	2.33032e-11	2.22315e-11	3.31296e-11	1.9991e-11	1.55679e-11	3.06122e-11	2.44066e-11	2.94608e-11	2.23861e-11	1.92337e-11	2.05507e-11	1.62193e-11	2.70207e-11	2.27522e-11	1.92083e-11	1.99348e-11	2.40428e-11	2.17906e-11	1.78632e-11	1.57709e-11	1.8238e-11	2.18478e-11
10.4	1.99927e-11	2.3043e-11	2.14871e-11	2.14871e-11	2.71184e-11	2.19959e-11	2.55985e-11	2.33062e-11	2.22303e-11	3.31325e-11	1.99936e-11	1.55666e-11	3.06079e-11	2.44028e-11	2.94596e-11	2.23816e-11	1.92274e-11	2.05501e-11	1.62228e-11	2.70109e-11	2.27529e-11	1.92057e-11	1.99347e-11	2.40408e-11	2.17955e-11	1.78739e-11	1.57662e-11	1.82313e-11	2.18576e-11
10.42	1.9998e-11	2.30445e-11	2.14899e-11	2.14899e-11	2.71237e-11	2.19886e-11	2.56022e-11	2.3298e-11	2.22325e-11	3.31319e-11	1.9994e-11	1.55668e-11	3.06118e-11	2.44079e-11	2.94648e-11	2.23857e-11	1.9235e-11	2.05547e-11	1.62191e-11	2.70475e-11	2.27463e-11	1.92075e-11	1.99352e-11	2.40409e-11	2.17926e-11	1.78695e-11	1.57599e-11	1.82401e-11	2.18614e-11
10.44	1.9997e-11	2.30482e-11	2.14847e-11	2.14847e-11	2.71232e-11	2.19887e-11	2.56022e-11	2.33003e-11	2.2239e-11	3.31355e-11	1.99886e-11	1.55675e-11	3.06106e-11	2.44072e-11	2.94609e-11	2.23875e-11	1.92358e-11	2.05513e-11	1.62237e-11	2.70261e-11	2.27477e-11	1.92075e-11	1.99336e-11	2.40397e-11	2.17986e-11	1.78697e-11	1.57672e-11	1.82343e-11	2.18584e-11
10.46	1.9999e-11	2.30488e-11	2.14818e-11	2.14818e-11	2.71217e-11	2.19924e-11	2.56015e-11	2.3302e-11	2.22356e-11	3.31387e-11	1.99929e-11	1.55734e-11	3.06097e-11	2.441e-11	2.94628e-11	2.23866e-11	1.92302e-11	2.05494e-11	1.62263e-11	2.70087e-11	2.27458e-11	1.92065e-11	1.99353e-11	2.40365e-11	2.17835e-11	1.78711e-11	1.57667e-11	1.82375e-11	2.18553e-11
10.48	1.9995e-11	2.3052e-11	2.14817e-11	2.14817e-11	2.7115e-11	2.19939e-11	2.55995e-11	2.33014e-11	2.22344e-11	3.31323e-11	1.9998e-11	1.55716e-11	3.06177e-11	2.44059e-11	2.94608e-11	2.23856e-11	1.92306e-11	2.05505e-11	1.62377e-11	2.69858e-11	2.2757e-11	1.92015e-11	1.99332e-11	2.40413e-11	2.17899e-11	1.78742e-11	1.57758e-11	1.8242e-11	2.1859e-11
10.5	1.99924e-11	2.30483e-11	2.14843e-11	2.14843e-11	2.71218e-11	2.19942e-11	2.5596e-11	2.32968e-11	2.22298e-11	3.31296e-11	1.99893e-11	1.55713e-11	3.06124e-11	2.44e-11	2.94643e-11	2.23832e-11	1.9229e-11	2.05497e-11	1.62313e-11	2.70066e-11	2.27603e-11	1.92055e-11	1.99314e-11	2.40379e-11	2.17905e-11	1.7877e-11	1.5768e-11	1.82349e-11	2.1856e-11
10.52	1.99929e-11	2.30441e-11	2.14836e-11	2.14836e-11	2.71223e-11	2.19925e-11	2.56066e-11	2.32963e-11	2.22342e-11	3.31327e-11	1.99897e-11	1.55684e-11	3.06105e-11	2.44027e-11	2.94555e-11	2.23921e-11	1.92324e-11	2.05476e-11	1.62223e-11	2.70147e-11	2.27487e-11	1.92082e-11	1.99331e-11	2.40411e-11	2.17875e-11	1.7865e-11	1.57587e-11	1.82367e-11	2.18602e-11
10.54	1.99881e-11	2.30447e-11	2.14872e-11	2.14872e-11	2.71199e-11	2.20009e-11	2.56051e-11	2.32913e-11	2.22319e-11	3.31324e-11	1.99922e-11	1.55642e-11	3.06074e-11	2.44078e-11	2.94619e-11	2.23917e-11	1.92289e-11	2.05515e-11	1.62287e-11	2.70138e-11	2.27516e-11	1.92034e-11	1.99356e-11	2.40398e-11	2.17895e-11	1.78598e-11	1.57649e-11	1.82359e-11	2.18643e-11
10.56	1.99984e-11	2.30534e-11	2.14887e-11	2.14887e-11	2.71181e-11	2.19836e-11	2.55997e-11	2.32974e-11	2.22324e-11	3.3134e-11	1.99913e-11	1.55724e-11	3.0608e-11	2.44095e-11	2.94602e-11	2.23865e-11	1.92344e-11	2.05434e-11	1.62203e-11	2.70156e-11	2.27502e-11	1.92048e-11	1.99309e-11	2.40399e-11	2.17877e-11	1.78686e-11	1.57608e-11	1.82395e-11	2.18607e-11
10.58	1.99946e-11	2.30428e-11	2.14849e-11	2.14849e-11	2.71238e-11	2.1984e-11	2.56008e-11	2.33018e-11	2.22323e-11	3.31401e-11	1.99899e-11	1.55706e-11	3.06122e-11	2.44047e-11	2.94599e-11	2.23863e-11	1.92329e-11	2.05455e-11	1.62134e-11	2.70215e-11	2.27557e-11	1.91993e-11	1.99352e-11	2.40338e-11	2.17903e-11	1.7862e-11	1.57705e-11	1.82336e-11	2.18687e-11
10.6	1.99961e-11	2.30483e-11	2.14845e-11	2.14845e-11	2.713e-11	2.19885e-11	2.56021e-11	2.3292e-11	2.22279e-11	3.3136e-11	1.99939e-11	1.55774e-11	3.0609e-11	2.44056e-11	2.94631e-11	2.23877e-11	1.92277e-11	2.05386e-11	1.62226e-11	2.702e-11	2.27552e-11	1.92052e-11	1.99324e-11	2.404e-11	2.17932e-11	1.78668e-11	1.57641e-11	1.82348e-11	2.18634e-11
10.62	1.99986e-11	2.305e-11	2.14878e-11	2.14878e-11	2.71191e-11	2.19868e-11	2.56009e-11	2.32999e-11	2.22283e-11	3.31384e-11	1.9991e-11	1.55719e-11	3.06131e-11	2.44061e-11	2.94605e-11	2.23883e-11	1.92276e-11	2.05402e-11	1.62212e-11	2.70233e-11	2.27577e-11	1.92047e-11	1.99356e-11	2.40345e-11	2.17891e-11	1.78717e-11	1.57667e-11	1.82375e-11	2.18551e-11
10.64	1.99916e-11	2.30426e-11	2.14837e-11	2.14837e-11	2.712e-11	2.19901e-11	2.55992e-11	2.32851e-11	2.22246e-11	3.31377e-11	1.99932e-11	1.55687e-11	3.06113e-11	2.44076e-11	2.9461e-11	2.23861e-11	1.92339e-11	2.05476e-11	1.62295e-11	2.7011e-11	2.27567e-11	1.92041e-11	1.99342e-11	2.40409e-11	2.17903e-11	1.78762e-11	1.57675e-11	1.82324e-11	2.18613e-11
10.66	1.99942e-11	2.30444e-11	2.14835e-11	2.14835e-11	2.7122e-11	2.19947e-11	2.55987e-11	2.32903e-11	2.22354e-11	3.31378e-11	1.99928e-11	1.55632e-11	3.06137e-11	2.44077e-11	2.94604e-11	2.23879e-11	1.92303e-11	2.05382e-11	1.62324e-11	2.69843e-11	2.27494e-11	1.92045e-11	1.99296e-11	2.40324e-11	2.17861e-11	1.78575e-11	1.57746e-11	1.82346e-11	2.18594e-11
10.68	1.99958e-11	2.30428e-11	2.14873e-11	2.14873e-11	2.71215e-11	2.19979e-11	2.55924e-11	2.32858e-11	2.22282e-11	3.31378e-11	1.99914e-11	1.55697e-11	3.06122e-11	2.44086e-11	2.94604e-11	2.2384e-11	1.92282e-11	2.055e-11	1.62194e-11	2.70244e-11	2.27531e-11	1.92048e-11	1.99352e-11	2.4042e-11	2.17778e-11	1.78634e-11	1.57623e-11	1.82396e-11	2.18604e-11
10.7	1.99963e-11	2.30406e-11	2.14893e-11	2.14893e-11	2.71233e-11	2.19916e-11	2.55999e-11	2.32854e-11	2.22359e-11	3.31376e-11	1.99996e-11	1.55675e-11	3.0613e-11	2.44075e-11	2.94627e-11	2.23925e-11	1.92294e-11	2.0551e-11	1.62235e-11	2.70338e-11	2.27504e-11	1.92059e-11	1.99339e-11	2.40424e-11	2.17748e-11	1.78496e-11	1.57637e-11	1.82296e-11	2.18556e-11
10.72	1.99975e-11	2.30453e-11	2.1484e-11	2.1484e-11	2.71231e-11	2.19884e-11	2.56015e-11	2.32924e-11	2.22274e-11	3.31364e-11	2.00005e-11	1.55675e-11	3.06141e-11	2.44092e-11	2.94613e-11	2.23914e-11	1.92308e-11	2.05514e-11	1.62326e-11	2.7016e-11	2.27627e-11	1.92035e-11	1.99361e-11	2.40407e-11	2.17638e-11	1.78509e-11	1.57576e-11	1.82361e-11	2.18674e-11
10.74	1.99918e-11	2.30454e-11	2.14878e-11	2.14878e-11	2.71177e-11	2.19852e-11	2.55991e-11	2.3291e-11	2.22339e-11	3.31378e-11	1.99954e-11	1.55699e-11	3.06156e-11	2.44119e-11	2.94672e-11	2.23824e-11	1.92313e-11	2.05558e-11	1.62309e-11	2.70134e-11	2.27537e-11	1.92039e-11	1.99352e-11	2.40412e-11	2.17599e-11	1.78429e-11	1.57693e-11	1.82337e-11	2.1862e-11
10.76	1.99964e-11	2.30454e-11	2.14859e-11	2.14859e-11	2.71251e-11	2.19927e-11	2.56019e-11	2.32915e-11	2.22323e-11	3.31394e-11	1.99937e-11	1.55649e-11	3.06132e-11	2.44059e-11	2.94572e-11	2.23889e-11	1.92259e-11	2.0555e-11	1.62244e-11	2.70115e-11	2.27529e-11	1.92027e-11	1.99364e-11	2.40422e-11	2.17606e-11	1.78404e-11	1.57726e-11	1.82379e-11	2.18582e-11
10.78	1.99933e-11	2.30522e-11	2.14842e-11	2.14842e-11	2.71228e-11	2.19927e-11	2.55986e-11	2.32897e-11	2.2232e-11	3.3131e-11	1.99943e-11	1.55652e-11	3.06175e-11	2.44087e-11	2.94621e-11	2.23855e-11	1.92281e-11	2.05495e-11	1.62218e-11	2.6996e-11	2.27501e-11	1.92004e-11	1.99332e-11	2.40389e-11	2.17615e-11	1.78398e-11	1.57605e-11	1.82338e-11	2.18625e-11
10.8	1.9995e-11	2.3046e-11	2.1492e-11	2.1492e-11	2.71178e-11	2.19933e-11	2.55947e-11	2.32901e-11	2.22263e-11	3.31338e-11	1.99887e-11	1.55703e-11	3.06111e-11	2.44044e-11	2.94674e-11	2.23887e-11	1.92284e-11	2.05453e-11	1.62291e-11	2.70014e-11	2.27516e-11	1.92036e-11	1.99313e-11	2.40407e-11	2.17634e-11	1.78452e-11	1.57678e-11	1.8239e-11	2.18592e-11
10.82	1.99911e-11	2.3041e-11	2.14852e-11	2.14852e-11	2.7118e-11	2.19877e-11	2.55985e-11	2.3286e-11	2.22278e-11	3.3139e-11	1.99892e-11	1.55679e-11	3.06135e-11	2.44083e-11	2.946e-11	2.23882e-11	1.92274e-11	2.05494e-11	1.62205e-11	2.69741e-11	2.2748e-11	1.92094e-11	1.99346e-11	2.40415e-11	2.17634e-11	1.78388e-11	1.5756e-11	1.82347e-11	2.18582e-11
10.84	1.99938e-11	2.30402e-11	2.14864e-11	2.14864e-11	2.71176e-11	2.19901e-11	2.55994e-11	2.32871e-11	2.22274e-11	3.3136e-11	1.99939e-11	1.55673e-11	3.06115e-11	2.44039e-11	2.94633e-11	2.23899e-11	1.9228e-11	2.05458e-11	1.62316e-11	2.69956e-11	2.2751e-11	1.92105e-11	1.99306e-11	2.40379e-11	2.17621e-11	1.784e-11	1.57644e-11	1.82314e-11	2.18632e-11
10.86	1.99905e-11	2.30449e-11	2.14834e-11	2.14834e-11	2.7124e-11	2.19833e-11	2.55987e-11	2.32927e-11	2.22279e-11	3.31326e-11	1.99912e-11	1.55673e-11	3.06171e-11	2.44065e-11	2.94671e-11	2.23866e-11	1.92311e-11	2.05452e-11	1.62275e-11	2.7001e-11	2.27557e-11	1.92063e-11	1.99282e-11	2.40389e-11	2.1761e-11	1.78347e-11	1.57654e-11	1.82388e-11	2.18636e-11
10.88	1.99961e-11	2.30441e-11	2.14871e-11	2.14871e-11	2.71242e-11	2.19967e-11	2.5601e-11	2.32844e-11	2.22303e-11	3.3138e-11	1.99911e-11	1.5568e-11	3.06107e-11	2.44073e-11	2.94591e-11	2.23908e-11	1.92293e-11	2.05514e-11	1.62269e-11	2.70442e-11	2.27508e-11	1.92066e-11	1.99302e-11	2.4037e-11	2.17625e-11	1.78344e-11	1.57576e-11	1.82257e-11	2.1865e-11
10.9	1.99927e-11	2.30476e-11	2.14817e-11	2.14817e-11	2.71213e-11	2.19885e-11	2.56039e-11	2.32862e-11	2.22294e-11	3.31388e-11	1.99895e-11	1.55659e-11	3.06149e-11	2.44038e-11	2.94646e-11	2.2386e-11	1.92303e-11	2.05435e-11	1.62346e-11	2.69897e-11	2.27467e-11	1.92017e-11	1.99378e-11	2.40371e-11	2.17599e-11	1.78398e-11	1.57625e-11	1.82364e-11	2.18566e-11
10.92	1.99944e-11	2.30449e-11	2.1483e-11	2.1483e-11	2.71205e-11	2.19887e-11	2.56034e-11	2.32879e-11	2.22281e-11	3.3142e-11	1.99916e-11	1.55723e-11	3.06159e-11	2.44025e-11	2.94647e-11	2.23852e-11	1.923e-11	2.05506e-11	1.62406e-11	2.70037e-11	2.27548e-11	1.92051e-11	1.99319e-11	2.40689e-11	2.17657e-11	1.78449e-11	1.57674e-11	1.82402e-11	2.18509e-11
10.94	1.99911e-11	2.30445e-11	2.14867e-11	2.14867e-11	2.7123e-11	2.19926e-11	2.56007e-11	2.32819e-11	2.22272e-11	3.31335e-11	1.99877e-11	1.55682e-11	3.06107e-11	2.44081e-11	2.94628e-11	2.23893e-11	1.92352e-11	2.05523e-11	1.62305e-11	2.70173e-11	2.27578e-11	1.92064e-11	1.99355e-11	2.40342e-11	2.17629e-11	1.7846e-11	1.57617e-11	1.8234e-11	2.18607e-11
10.96	2.00007e-11	2.30471e-11	2.14863e-11	2.14863e-11	2.71202e-11	2.19992e-11	2.55989e-11	2.32782e-11	2.22357e-11	3.31363e-11	1.99963e-11	1.55653e-11	3.06148e-11	2.44087e-11	2.94654e-11	2.23929e-11	1.92311e-11	2.055e-11	1.62262e-11	2.70012e-11	2.27541e-11	1.92057e-11	1.99318e-11	2.40438e-11	2.17697e-11	1.78488e-11	1.57682e-11	1.82343e-11	2.1855e-11
10.98	1.99967e-11	2.3044e-11	2.14862e-11	2.14862e-11	2.71233e-11	2.19849e-11	2.56029e-11	2.32833e-11	2.22323e-11	3.31382e-11	1.99907e-11	1.55695e-11	3.06072e-11	2.44052e-11	2.94643e-11	2.23931e-11	1.92326e-11	2.05494e-11	1.62363e-11	2.6989e-11	2.27531e-11	1.92034e-11	1.99308e-11	2.40322e-11	2.17578e-11	1.78419e-11	1.57628e-11	1.82414e-11	2.18618e-11
11	1.99892e-11	2.30494e-11	2.14922e-11	2.14922e-11	2.71197e-11	2.19919e-11	2.56009e-11	2.3291e-11	2.22343e-11	3.31334e-11	1.99908e-11	1.55623e-11	3.06097e-11	2.44109e-11	2.94619e-11	2.2388e-11	1.92292e-11	2.05487e-11	1.62234e-11	2.69988e-11	2.27478e-11	1.92083e-11	1.99348e-11	2.40423e-11	2.17626e-11	1.78343e-11	1.57718e-11	1.82334e-11	2.18502e-11
11.02	1.99939e-11	2.30457e-11	2.1487e-11	2.1487e-11	2.71218e-11	2.19947e-11	2.56027e-11	2.32815e-11	2.22334e-11	3.31351e-11	1.99942e-11	1.55684e-11	3.06132e-11	2.44053e-11	2.94676e-11	2.23913e-11	1.92324e-11	2.05493e-11	1.62294e-11	2.69981e-11	2.27548e-11	1.92045e-11	1.99348e-11	2.4013e-11	2.17617e-11	1.78339e-11	1.57693e-11	1.82379e-11	2.18557e-11
11.04	1.99971e-11	2.30372e-11	2.14903e-11	2.14903e-11	2.71238e-11	2.19871e-11	2.55956e-11	2.32797e-11	2.22341e-11	3.31358e-11	1.99921e-11	1.55681e-11	3.06133e-11	2.44056e-11	2.94624e-11	2.23861e-11	1.9233e-11	2.05562e-11	1.62261e-11	2.69774e-11	2.27441e-11	1.92057e-11	1.99327e-11	2.38962e-11	2.17654e-11	1.78429e-11	1.57669e-11	1.82299e-11	2.18514e-11
11.06	1.99947e-11	2.30484e-11	2.14852e-11	2.14852e-11	2.71216e-11	2.19913e-11	2.55987e-11	2.32789e-11	2.22358e-11	3.314e-11	1.99947e-11	1.55665e-11	3.06117e-11	2.44069e-11	2.94644e-11	2.23893e-11	1.92286e-11	2.05562e-11	1.62235e-11	2.69831e-11	2.2747e-11	1.92047e-11	1.9929e-11	2.37743e-11	2.17623e-11	1.78316e-11	1.57612e-11	1.82403e-11	2.18629e-11
11.08	1.99958e-11	2.30474e-11	2.14832e-11	2.14832e-11	2.71218e-11	2.19842e-11	2.56007e-11	2.32799e-11	2.22333e-11	3.31391e-11	1.99917e-11	1.55664e-11	3.06137e-11	2.44087e-11	2.94686e-11	2.23867e-11	1.92287e-11	2.05553e-11	1.62224e-11	2.69909e-11	2.27488e-11	1.92017e-11	1.99391e-11	2.37149e-11	2.17615e-11	1.7839e-11	1.57682e-11	1.82348e-11	2.18583e-11
11.1	1.99922e-11	2.30458e-11	2.14861e-11	2.14861e-11	2.7116e-11	2.19863e-11	2.56021e-11	2.32768e-11	2.22353e-11	3.31385e-11	1.99944e-11	1.55648e-11	3.06151e-11	2.44038e-11	2.94699e-11	2.23892e-11	1.9229e-11	2.0549e-11	1.62243e-11	2.70076e-11	2.2749e-11	1.92033e-11	1.99305e-11	2.36775e-11	2.17631e-11	1.78403e-11	1.57519e-11	1.8235e-11	2.18644e-11
11.12	1.99992e-11	2.30467e-11	2.14805e-11	2.14805e-11	2.71211e-11	2.19878e-11	2.55963e-11	2.32775e-11	2.22292e-11	3.31443e-11	1.99924e-11	1.55672e-11	3.06061e-11	2.44092e-11	2.94648e-11	2.23873e-11	1.92306e-11	2.05531e-11	1.62363e-11	2.6981e-11	2.27517e-11	1.92066e-11	1.99374e-11	2.36619e-11	2.17609e-11	1.7841e-11	1.57801e-11	1.8243e-11	2.18621e-11
11.14	2.00034e-11	2.30464e-11	2.14843e-11	2.14843e-11	2.71212e-11	2.19895e-11	2.56014e-11	2.32789e-11	2.22322e-11	3.31363e-11	1.99942e-11	1.55629e-11	3.0611e-11	2.44038e-11	2.94648e-11	2.23855e-11	1.92304e-11	2.05518e-11	1.62198e-11	2.69726e-11	2.27569e-11	1.92035e-11	1.99384e-11	2.36487e-11	2.17622e-11	1.78371e-11	1.57653e-11	1.82361e-11	2.1858e-11
11.16	2e-11	2.3052e-11	2.14863e-11	2.14863e-11	2.7121e-11	2.19893e-11	2.55992e-11	2.32806e-11	2.22323e-11	3.31369e-11	1.99971e-11	1.55645e-11	3.06116e-11	2.44046e-11	2.94697e-11	2.23864e-11	1.92317e-11	2.05558e-11	1.62173e-11	2.69701e-11	2.27427e-11	1.9208e-11	1.99351e-11	2.36362e-11	2.1754e-11	1.78419e-11	1.57717e-11	1.82344e-11	2.18585e-11
11.18	2.00002e-11	2.30407e-11	2.14812e-11	2.14812e-11	2.71215e-11	2.19858e-11	2.55973e-11	2.32827e-11	2.22295e-11	3.31401e-11	1.99927e-11	1.55702e-11	3.06062e-11	2.44044e-11	2.94682e-11	2.23843e-11	1.92337e-11	2.05607e-11	1.62261e-11	2.69833e-11	2.27591e-11	1.92056e-11	1.99313e-11	2.3639e-11	2.17627e-11	1.78536e-11	1.57566e-11	1.82404e-11	2.18613e-11
11.2	1.99948e-11	2.30455e-11	2.14834e-11	2.14834e-11	2.71209e-11	2.19886e-11	2.5594e-11	2.3279e-11	2.22315e-11	3.31394e-11	1.99955e-11	1.55638e-11	3.06134e-11	2.44048e-11	2.94643e-11	2.23865e-11	1.923e-11	2.0563e-11	1.62217e-11	2.6969e-11	2.27518e-11	1.92004e-11	1.99277e-11	2.36405e-11	2.1765e-11	1.78489e-11	1.57714e-11	1.82369e-11	2.18555e-11
11.22	1.9988e-11	2.30468e-11	2.14914e-11	2.14914e-11	2.71199e-11	2.19879e-11	2.55982e-11	2.328e-11	2.22292e-11	3.31443e-11	1.99983e-11	1.55663e-11	3.06134e-11	2.44047e-11	2.94632e-11	2.23882e-11	1.92315e-11	2.05591e-11	1.62118e-11	2.7002e-11	2.27489e-11	1.92088e-11	1.99297e-11	2.36304e-11	2.17614e-11	1.78478e-11	1.57697e-11	1.82358e-11	2.18657e-11
11.24	1.99929e-11	2.30403e-11	2.1486e-11	2.1486e-11	2.71202e-11	2.19969e-11	2.56008e-11	2.32822e-11	2.22315e-11	3.31386e-11	1.9992e-11	1.55639e-11	3.06125e-11	2.44029e-11	2.94649e-11	2.23854e-11	1.92342e-11	2.05594e-11	1.62077e-11	2.69781e-11	2.27471e-11	1.92095e-11	1.99364e-11	2.3634e-11	2.17586e-11	1.78503e-11	1.5774e-11	1.82358e-11	2.18594e-11
11.26	1.99967e-11	2.30463e-11	2.14873e-11	2.14873e-11	2.71242e-11	2.19877e-11	2.56062e-11	2.32729e-11	2.22308e-11	3.31363e-11	1.99984e-11	1.55647e-11	3.06108e-11	2.44041e-11	2.94662e-11	2.23837e-11	1.92311e-11	2.05634e-11	1.62129e-11	2.6966e-11	2.27474e-11	1.921e-11	1.99361e-11	2.36259e-11	2.17619e-11	1.78603e-11	1.57633e-11	1.82354e-11	2.18478e-11
11.28	1.99906e-11	2.30476e-11	2.14848e-11	2.14848e-11	2.71169e-11	2.19917e-11	2.56035e-11	2.32679e-11	2.2229e-11	3.31383e-11	1.99948e-11	1.5567e-11	3.06148e-11	2.44094e-11	2.94656e-11	2.23858e-11	1.92345e-11	2.05581e-11	1.62208e-11	2.6953e-11	2.27584e-11	1.92089e-11	1.99316e-11	2.36242e-11	2.17541e-11	1.78584e-11	1.57609e-11	1.82367e-11	2.18603e-11
11.3	1.99973e-11	2.30446e-11	2.14869e-11	2.14869e-11	2.71212e-11	2.19818e-11	2.55982e-11	2.32724e-11	2.22208e-11	3.31308e-11	1.99942e-11	1.55681e-11	3.0612e-11	2.44052e-11	2.94644e-11	2.23838e-11	1.92349e-11	2.05596e-11	1.62206e-11	2.70084e-11	2.27514e-11	1.92112e-11	1.99308e-11	2.36201e-11	2.17583e-11	1.78454e-11	1.57751e-11	1.8232e-11	2.18564e-11
11.32	1.99992e-11	2.30426e-11	2.14857e-11	2.14857e-11	2.71266e-11	2.19889e-11	2.56015e-11	2.32725e-11	2.22267e-11	3.31411e-11	1.99919e-11	1.55677e-11	3.06105e-11	2.44038e-11	2.94656e-11	2.23877e-11	1.92299e-11	2.05594e-11	1.62119e-11	2.69727e-11	2.27512e-11	1.92058e-11	1.99361e-11	2.36159e-11	2.17648e-11	1.78573e-11	1.57653e-11	1.82388e-11	2.18636e-11
11.34	2.00022e-11	2.30478e-11	2.14895e-11	2.14895e-11	2.71213e-11	2.19915e-11	2.55968e-11	2.32807e-11	2.22344e-11	3.3135e-11	1.99947e-11	1.55667e-11	3.06126e-11	2.44084e-11	2.94628e-11	2.23837e-11	1.924e-11	2.05679e-11	1.62075e-11	2.69507e-11	2.2742e-11	1.92085e-11	1.99356e-11	2.361e-11	2.17618e-11	1.78497e-11	1.57734e-11	1.82429e-11	2.18571e-11
11.36	1.99966e-11	2.30434e-11	2.14887e-11	2.14887e-11	2.71228e-11	2.19938e-11	2.55984e-11	2.32748e-11	2.22304e-11	3.31477e-11	1.99953e-11	1.55681e-11	3.06151e-11	2.44072e-11	2.94644e-11	2.23901e-11	1.92348e-11	2.05674e-11	1.62127e-11	2.69898e-11	2.27438e-11	1.92058e-11	1.99361e-11	2.36021e-11	2.17677e-11	1.78593e-11	1.57543e-11	1.8236e-11	2.18611e-11
11.38	1.99929e-11	2.30457e-11	2.14894e-11	2.14894e-11	2.71192e-11	2.19885e-11	2.5602e-11	2.32693e-11	2.22318e-11	3.31446e-11	1.99971e-11	1.55616e-11	3.06163e-11	2.44039e-11	2.94636e-11	2.23888e-11	1.92324e-11	2.05616e-11	1.6227e-11	2.69409e-11	2.27445e-11	1.92053e-11	1.99348e-11	2.36063e-11	2.1759e-11	1.78525e-11	1.57671e-11	1.82401e-11	2.18582e-11
11.4	1.99964e-11	2.30501e-11	2.14878e-11	2.14878e-11	2.7118e-11	2.19899e-11	2.5602e-11	2.32765e-11	2.22351e-11	3.31483e-11	1.99955e-11	1.55636e-11	3.06151e-11	2.44072e-11	2.94723e-11	2.23898e-11	1.92358e-11	2.05599e-11	1.62286e-11	2.6965e-11	2.27492e-11	1.92028e-11	1.99354e-11	2.3598e-11	2.17552e-11	1.78514e-11	1.57581e-11	1.82422e-11	2.18576e-11
11.42	2e-11	2.30542e-11	2.14912e-11	2.14912e-11	2.71214e-11	2.19862e-11	2.56002e-11	2.32676e-11	2.2227e-11	3.3146e-11	1.99929e-11	1.55591e-11	3.06132e-11	2.44077e-11	2.94628e-11	2.23856e-11	1.92324e-11	2.05587e-11	1.62291e-11	2.6979e-11	2.27367e-11	1.92096e-11	1.99338e-11	2.36044e-11	2.1759e-11	1.78491e-11	1.5772e-11	1.8232e-11	2.18563e-11
11.44	1.99978e-11	2.3043e-11	2.14889e-11	2.14889e-11	2.71161e-11	2.19887e-11	2.56017e-11	2.32744e-11	2.22274e-11	3.31479e-11	1.99974e-11	1.55606e-11	3.06132e-11	2.44061e-11	2.94633e-11	2.23867e-11	1.92316e-11	2.05587e-11	1.62202e-11	2.69611e-11	2.27493e-11	1.92011e-11	1.99349e-11	2.3604e-11	2.17589e-11	1.78512e-11	1.577e-11	1.82367e-11	2.18553e-11
11.46	1.99939e-11	2.30532e-11	2.14841e-11	2.14841e-11	2.71161e-11	2.19889e-11	2.56003e-11	2.32697e-11	2.2233e-11	3.31523e-11	1.99938e-11	1.55669e-11	3.06155e-11	2.44043e-11	2.94598e-11	2.23874e-11	1.92346e-11	2.05571e-11	1.62216e-11	2.69862e-11	2.27437e-11	1.92101e-11	1.99349e-11	2.35984e-11	2.17599e-11	1.78532e-11	1.5763e-11	1.82338e-11	2.1855e-11
11.48	1.99955e-11	2.30484e-11	2.14854e-11	2.14854e-11	2.71179e-11	2.19859e-11	2.56034e-11	2.32688e-11	2.22332e-11	3.31466e-11	1.99935e-11	1.55668e-11	3.06127e-11	2.44e-11	2.94615e-11	2.23907e-11	1.92351e-11	2.05542e-11	1.62216e-11	2.69551e-11	2.27381e-11	1.92043e-11	1.99373e-11	2.35967e-11	2.17648e-11	1.78453e-11	1.57693e-11	1.82348e-11	2.18531e-11
11.5	1.99972e-11	2.30498e-11	2.14889e-11	2.14889e-11	2.71199e-11	2.198e-11	2.55977e-11	2.327e-11	2.22285e-11	3.31378e-11	1.99967e-11	1.55629e-11	3.06157e-11	2.44063e-11	2.9462e-11	2.23893e-11	1.92271e-11	2.05627e-11	1.62242e-11	2.6958e-11	2.27388e-11	1.92062e-11	1.99396e-11	2.35981e-11	2.17516e-11	1.78398e-11	1.57621e-11	1.82428e-11	2.18538e-11
11.52	1.99964e-11	2.30468e-11	2.14876e-11	2.14876e-11	2.71149e-11	2.19915e-11	2.55984e-11	2.32714e-11	2.22292e-11	3.3137e-11	1.9995e-11	1.55664e-11	3.06156e-11	2.44078e-11	2.94611e-11	2.23818e-11	1.92332e-11	2.05593e-11	1.62175e-11	2.69803e-11	2.27429e-11	1.92091e-11	1.99347e-11	2.35928e-11	2.17549e-11	1.78398e-11	1.57602e-11	1.82325e-11	2.18538e-11
11.54	2.00026e-11	2.30451e-11	2.14876e-11	2.14876e-11	2.71204e-11	2.19933e-11	2.55977e-11	2.32686e-11	2.22297e-11	3.31423e-11	1.99979e-11	1.5567e-11	3.06146e-11	2.43989e-11	2.94628e-11	2.23816e-11	1.92367e-11	2.05585e-11	1.62323e-11	2.69882e-11	2.27461e-11	1.92097e-11	1.99385e-11	2.35968e-11	2.17618e-11	1.78492e-11	1.57704e-11	1.82335e-11	2.18534e-11
11.56	1.99985e-11	2.30512e-11	2.14879e-11	2.14879e-11	2.7121e-11	2.19893e-11	2.55981e-11	2.32675e-11	2.22307e-11	3.31425e-11	1.99987e-11	1.55638e-11	3.06147e-11	2.44039e-11	2.94626e-11	2.23855e-11	1.92329e-11	2.05558e-11	1.62217e-11	2.69298e-11	2.27349e-11	1.92058e-11	1.99401e-11	2.3597e-11	2.17567e-11	1.78383e-11	1.57728e-11	1.8238e-11	2.18579e-11
11.58	1.9994e-11	2.30441e-11	2.14877e-11	2.14877e-11	2.71184e-11	2.19878e-11	2.55983e-11	2.32638e-11	2.22309e-11	3.31467e-11	1.99946e-11	1.55618e-11	3.06173e-11	2.44011e-11	2.9465e-11	2.23852e-11	1.92352e-11	2.05607e-11	1.62331e-11	2.69581e-11	2.27445e-11	1.92043e-11	1.99415e-11	2.35909e-11	2.17618e-11	1.7843e-11	1.57674e-11	1.82457e-11	2.18507e-11
11.6	1.99921e-11	2.30408e-11	2.14801e-11	2.14801e-11	2.71241e-11	2.19882e-11	2.55958e-11	2.32641e-11	2.22306e-11	3.31415e-11	1.99986e-11	1.55618e-11	3.0613e-11	2.44048e-11	2.94588e-11	2.23937e-11	1.92359e-11	2.05548e-11	1.6229e-11	2.69528e-11	2.27441e-11	1.92077e-11	1.99361e-11	2.35899e-11	2.17624e-11	1.78414e-11	1.57642e-11	1.82358e-11	2.18556e-11
11.62	1.99948e-11	2.30484e-11	2.14841e-11	2.14841e-11	2.71177e-11	2.19902e-11	2.56022e-11	2.32696e-11	2.22292e-11	3.31495e-11	1.99988e-11	1.55646e-11	3.06139e-11	2.44037e-11	2.94615e-11	2.23855e-11	1.9228e-11	2.05626e-11	1.62198e-11	2.69701e-11	2.27386e-11	1.92037e-11	1.99414e-11	2.35923e-11	2.17571e-11	1.78494e-11	1.5775e-11	1.82426e-11	2.18586e-11
11.64	1.99973e-11	2.30448e-11	2.14903e-11	2.14903e-11	2.7115e-11	2.1987e-11	2.55971e-11	2.32595e-11	2.22292e-11	3.31447e-11	1.99963e-11	1.55601e-11	3.06135e-11	2.44049e-11	2.94612e-11	2.23897e-11	1.92326e-11	2.05644e-11	1.62183e-11	2.69653e-11	2.27415e-11	1.92117e-11	1.99377e-11	2.35903e-11	2.17582e-11	1.78443e-11	1.5776e-11	1.82374e-11	2.18619e-11
11.66	1.99923e-11	2.30508e-11	2.14879e-11	2.14879e-11	2.71163e-11	2.19899e-11	2.56032e-11	2.32651e-11	2.22331e-11	3.31401e-11	1.99996e-11	1.5565e-11	3.06165e-11	2.44042e-11	2.94661e-11	2.2388e-11	1.9232e-11	2.05577e-11	1.62218e-11	2.69551e-11	2.27452e-11	1.92115e-11	1.99343e-11	2.35846e-11	2.17591e-11	1.78494e-11	1.57624e-11	1.82383e-11	2.18617e-11
11.68	1.99936e-11	2.30467e-11	2.14825e-11	2.14825e-11	2.71273e-11	2.19872e-11	2.56004e-11	2.32619e-11	2.22349e-11	3.31418e-11	1.99962e-11	1.55663e-11	3.06171e-11	2.44029e-11	2.94576e-11	2.23876e-11	1.9234e-11	2.05641e-11	1.62173e-11	2.69734e-11	2.27469e-11	1.9205e-11	1.9934e-11	2.35944e-11	2.17581e-11	1.78474e-11	1.57708e-11	1.82357e-11	2.18555e-11
11.7	1.99987e-11	2.30457e-11	2.14829e-11	2.14829e-11	2.71183e-11	2.19834e-11	2.55976e-11	2.3267e-11	2.22262e-11	3.31499e-11	2.00003e-11	1.55655e-11	3.06201e-11	2.44061e-11	2.94565e-11	2.23924e-11	1.92329e-11	2.05595e-11	1.62293e-11	2.695e-11	2.27438e-11	1.92106e-11	1.99446e-11	2.35893e-11	2.17618e-11	1.7861e-11	1.5759e-11	1.82371e-11	2.18615e-11
11.72	1.99974e-11	2.3052e-11	2.14877e-11	2.14877e-11	2.71204e-11	2.19825e-11	2.55954e-11	2.32581e-11	2.22286e-11	3.31477e-11	1.99991e-11	1.55671e-11	3.06182e-11	2.44108e-11	2.94555e-11	2.23917e-11	1.92315e-11	2.05634e-11	1.62158e-11	2.69659e-11	2.27431e-11	1.92066e-11	1.99364e-11	2.35832e-11	2.17686e-11	1.78466e-11	1.57715e-11	1.8238e-11	2.1862e-11
11.74	1.99978e-11	2.30496e-11	2.14846e-11	2.14846e-11	2.7118e-11	2.19845e-11	2.55985e-11	2.32611e-11	2.22275e-11	3.31447e-11	2e-11	1.55595e-11	3.06148e-11	2.4405e-11	2.9455e-11	2.23915e-11	1.92362e-11	2.05623e-11	1.62186e-11	2.69698e-11	2.27448e-11	1.92059e-11	1.99366e-11	2.35843e-11	2.17616e-11	1.78498e-11	1.57686e-11	1.82334e-11	2.18582e-11
11.76	1.99932e-11	2.30552e-11	2.1489e-11	2.1489e-11	2.71219e-11	2.19902e-11	2.55971e-11	2.32626e-11	2.22246e-11	3.3144e-11	2.00005e-11	1.5562e-11	3.06166e-11	2.44052e-11	2.94559e-11	2.23915e-11	1.92325e-11	2.05572e-11	1.62239e-11	2.696e-11	2.27376e-11	1.92079e-11	1.99354e-11	2.35848e-11	2.1757e-11	1.78624e-11	1.57722e-11	1.82411e-11	2.18603e-11
11.78	1.99965e-11	2.30531e-11	2.14876e-11	2.14876e-11	2.71173e-11	2.1986e-11	2.55968e-11	2.32644e-11	2.22355e-11	3.31425e-11	2.00032e-11	1.55593e-11	3.06229e-11	2.44067e-11	2.94573e-11	2.23897e-11	1.92332e-11	2.0568e-11	1.62282e-11	2.6967e-11	2.27477e-11	1.92095e-11	1.99355e-11	2.35795e-11	2.17567e-11	1.78591e-11	1.57694e-11	1.82427e-11	2.18553e-11
11.8	1.99972e-11	2.30478e-11	2.14902e-11	2.14902e-11	2.71183e-11	2.19828e-11	2.55996e-11	2.32579e-11	2.22333e-11	3.3137e-11	2.00027e-11	1.55591e-11	3.0614e-11	2.44017e-11	2.94569e-11	2.23867e-11	1.92356e-11	2.05537e-11	1.62294e-11	2.69603e-11	2.27478e-11	1.92084e-11	1.99373e-11	2.35749e-11	2.17561e-11	1.78572e-11	1.57692e-11	1.82377e-11	2.18521e-11
11.82	1.99946e-11	2.30501e-11	2.14874e-11	2.14874e-11	2.71228e-11	2.19891e-11	2.55966e-11	2.32658e-11	2.22273e-11	3.31358e-11	1.99967e-11	1.55621e-11	3.06147e-11	2.43997e-11	2.94584e-11	2.23922e-11	1.92377e-11	2.05578e-11	1.62212e-11	2.69095e-11	2.27369e-11	1.92086e-11	1.99402e-11	2.35798e-11	2.17573e-11	1.78671e-11	1.57767e-11	1.82391e-11	2.18562e-11
11.84	1.99981e-11	2.30491e-11	2.14839e-11	2.14839e-11	2.71187e-11	2.19899e-11	2.56002e-11	2.32632e-11	2.2233e-11	3.31423e-11	2.00021e-11	1.55611e-11	3.06181e-11	2.44033e-11	2.94577e-11	2.23892e-11	1.92318e-11	2.05596e-11	1.62181e-11	2.69505e-11	2.27443e-11	1.92068e-11	1.99398e-11	2.35811e-11	2.17584e-11	1.78725e-11	1.5755e-11	1.8238e-11	2.18564e-11
11.86	2.00006e-11	2.30498e-11	2.1486e-11	2.1486e-11	2.7122e-11	2.19855e-11	2.56022e-11	2.3262e-11	2.22316e-11	3.31472e-11	2.00024e-11	1.55639e-11	3.06184e-11	2.44063e-11	2.94565e-11	2.23835e-11	1.92355e-11	2.05593e-11	1.62203e-11	2.69404e-11	2.27425e-11	1.921e-11	1.99413e-11	2.35743e-11	2.17543e-11	1.78685e-11	1.5768e-11	1.82424e-11	2.18469e-11
11.88	1.99965e-11	2.3058e-11	2.14845e-11	2.14845e-11	2.71223e-11	2.19882e-11	2.56016e-11	2.32641e-11	2.22275e-11	3.31486e-11	1.99993e-11	1.55643e-11	3.06164e-11	2.44049e-11	2.94591e-11	2.23876e-11	1.92345e-11	2.05541e-11	1.62219e-11	2.69391e-11	2.27442e-11	1.92112e-11	1.99372e-11	2.35782e-11	2.17624e-11	1.78576e-11	1.57725e-11	1.82366e-11	2.18484e-11
11.9	1.99974e-11	2.30491e-11	2.14867e-11	2.14867e-11	2.71193e-11	2.19893e-11	2.55982e-11	2.32665e-11	2.22289e-11	3.31464e-11	1.9998e-11	1.5561e-11	3.06161e-11	2.4403e-11	2.94607e-11	2.23889e-11	1.92346e-11	2.05615e-11	1.62219e-11	2.69479e-11	2.27457e-11	1.9209e-11	1.99379e-11	2.35713e-11	2.1755e-11	1.78533e-11	1.57641e-11	1.82377e-11	2.18616e-11
11.92	2.00039e-11	2.30419e-11	2.14865e-11	2.14865e-11	2.71231e-11	2.19853e-11	2.55986e-11	2.32652e-11	2.22334e-11	3.31507e-11	1.99975e-11	1.55611e-11	3.06182e-11	2.44082e-11	2.94589e-11	2.23895e-11	1.92315e-11	2.05625e-11	1.62326e-11	2.69422e-11	2.27426e-11	1.92109e-11	1.99353e-11	2.3572e-11	2.17572e-11	1.78424e-11	1.57662e-11	1.82343e-11	2.18521e-11
11.94	2e-11	2.30511e-11	2.14849e-11	2.14849e-11	2.7115e-11	2.19815e-11	2.56012e-11	2.32573e-11	2.2232e-11	3.31487e-11	1.99984e-11	1.55644e-11	3.06189e-11	2.44025e-11	2.94644e-11	2.23912e-11	1.92372e-11	2.05636e-11	1.62292e-11	2.69884e-11	2.27469e-11	1.92101e-11	1.99405e-11	2.35679e-11	2.1761e-11	1.78556e-11	1.57723e-11	1.82341e-11	2.18591e-11
11.96	1.99951e-11	2.30467e-11	2.14871e-11	2.14871e-11	2.71184e-11	2.1985e-11	2.55994e-11	2.32611e-11	2.22294e-11	3.31412e-11	1.99958e-11	1.55626e-11	3.06128e-11	2.44062e-11	2.94631e-11	2.23913e-11	1.92329e-11	2.05634e-11	1.62281e-11	2.69444e-11	2.27494e-11	1.92102e-11	1.99388e-11	2.35688e-11	2.17647e-11	1.78471e-11	1.57732e-11	1.82371e-11	2.18596e-11
11.98	1.99572e-11	2.3049e-11	2.14883e-11	2.14883e-11	2.71141e-11	2.1983e-11	2.5604e-11	2.32572e-11	2.22293e-11	3.31421e-11	2.00029e-11	1.55634e-11	3.06149e-11	2.44056e-11	2.9464e-11	2.23902e-11	1.92335e-11	2.0565e-11	1.62302e-11	2.69398e-11	2.2752e-11	1.92057e-11	1.99439e-11	2.35722e-11	2.17577e-11	1.78443e-11	1.57684e-11	1.8242e-11	2.18532e-11
12	1.98893e-11	2.30537e-11	2.1485e-11	2.1485e-11	2.71226e-11	2.19831e-11	2.56011e-11	2.32633e-11	2.22292e-11	3.31484e-11	1.99948e-11	1.55621e-11	3.0621e-11	2.44019e-11	2.94622e-11	2.23895e-11	1.92319e-11	2.0564e-11	1.6227e-11	2.69297e-11	2.27473e-11	1.92061e-11	1.99431e-11	2.35679e-11	2.17615e-11	1.7858e-11	1.57566e-11	1.82327e-11	2.18531e-11
12.02	1.98282e-11	2.30441e-11	2.14851e-11	2.14851e-11	2.71223e-11	2.19873e-11	2.55963e-11	2.32565e-11	2.22345e-11	3.31454e-11	1.9997e-11	1.5559e-11	3.06166e-11	2.43998e-11	2.94644e-11	2.23892e-11	1.92335e-11	2.05675e-11	1.62261e-11	2.69552e-11	2.27456e-11	1.92085e-11	1.99412e-11	2.35703e-11	2.17591e-11	1.78492e-11	1.57657e-11	1.82396e-11	2.18529e-11
12.04	1.98009e-11	2.30504e-11	2.14895e-11	2.14895e-11	2.71203e-11	2.19888e-11	2.56028e-11	2.32597e-11	2.22304e-11	3.3139e-11	1.99958e-11	1.55659e-11	3.06131e-11	2.44041e-11	2.94639e-11	2.2396e-11	1.92333e-11	2.05626e-11	1.62298e-11	2.69502e-11	2.27415e-11	1.92067e-11	1.99423e-11	2.35665e-11	2.17623e-11	1.78447e-11	1.57785e-11	1.82377e-11	2.18511e-11
12.06	1.97881e-11	2.30511e-11	2.14889e-11	2.14889e-11	2.71186e-11	2.19857e-11	2.56016e-11	2.3249e-11	2.22321e-11	3.31427e-11	1.99957e-11	1.55642e-11	3.06147e-11	2.44062e-11	2.94606e-11	2.23938e-11	1.92332e-11	2.05618e-11	1.62361e-11	2.69517e-11	2.27476e-11	1.92082e-11	1.99433e-11	2.35694e-11	2.1757e-11	1.78501e-11	1.57697e-11	1.82403e-11	2.18594e-11
12.08	1.97697e-11	2.30496e-11	2.14849e-11	2.14849e-11	2.71203e-11	2.19813e-11	2.56035e-11	2.32577e-11	2.22372e-11	3.31494e-11	1.99977e-11	1.55605e-11	3.06153e-11	2.44082e-11	2.94659e-11	2.23992e-11	1.92349e-11	2.05552e-11	1.62384e-11	2.69432e-11	2.27485e-11	1.92101e-11	1.99437e-11	2.35658e-11	2.17569e-11	1.78416e-11	1.57751e-11	1.8235e-11	2.18545e-11
12.1	1.97619e-11	2.30453e-11	2.14874e-11	2.14874e-11	2.71203e-11	2.1984e-11	2.55995e-11	2.3258e-11	2.22328e-11	3.31493e-11	1.99997e-11	1.55617e-11	3.06174e-11	2.44065e-11	2.94643e-11	2.23953e-11	1.9234e-11	2.05599e-11	1.6221e-11	2.69437e-11	2.27424e-11	1.92089e-11	1.99412e-11	2.35683e-11	2.17566e-11	1.7868e-11	1.57753e-11	1.82329e-11	2.18558e-11
12.12	1.9754e-11	2.30518e-11	2.14785e-11	2.14785e-11	2.71234e-11	2.19814e-11	2.5598e-11	2.32615e-11	2.22306e-11	3.31461e-11	1.99993e-11	1.55556e-11	3.06185e-11	2.44031e-11	2.94632e-11	2.23867e-11	1.9227e-11	2.05702e-11	1.62143e-11	2.69364e-11	2.27418e-11	1.92085e-11	1.99428e-11	2.35611e-11	2.17595e-11	1.78519e-11	1.57634e-11	1.8235e-11	2.18574e-11
12.14	1.97462e-11	2.30428e-11	2.14863e-11	2.14863e-11	2.71184e-11	2.19819e-11	2.56025e-11	2.32493e-11	2.22273e-11	3.31408e-11	1.99995e-11	1.55646e-11	3.06118e-11	2.44063e-11	2.94636e-11	2.239e-11	1.92388e-11	2.05678e-11	1.62245e-11	2.69283e-11	2.2744e-11	1.92123e-11	1.99407e-11	2.35623e-11	2.17515e-11	1.78722e-11	1.57753e-11	1.82376e-11	2.18575e-11
12.16	1.97534e-11	2.30556e-11	2.14861e-11	2.14861e-11	2.71155e-11	2.19828e-11	2.55979e-11	2.32581e-11	2.22346e-11	3.31447e-11	1.99969e-11	1.55672e-11	3.06114e-11	2.44021e-11	2.94582e-11	2.23948e-11	1.92293e-11	2.05652e-11	1.6224e-11	2.6899e-11	2.27468e-11	1.92055e-11	1.99386e-11	2.35685e-11	2.1758e-11	1.78648e-11	1.57675e-11	1.82402e-11	2.18551e-11
12.18	1.97466e-11	2.30461e-11	2.14889e-11	2.14889e-11	2.712e-11	2.19857e-11	2.56016e-11	2.32543e-11	2.22329e-11	3.31387e-11	1.99977e-11	1.55581e-11	3.06158e-11	2.44097e-11	2.94591e-11	2.23927e-11	1.92372e-11	2.05687e-11	1.62331e-11	2.69449e-11	2.27457e-11	1.92069e-11	1.99388e-11	2.35608e-11	2.17531e-11	1.7851e-11	1.57714e-11	1.82388e-11	2.18564e-11
12.2	1.97511e-11	2.30469e-11	2.14852e-11	2.14852e-11	2.71219e-11	2.19849e-11	2.56006e-11	2.32545e-11	2.22324e-11	3.31494e-11	1.99966e-11	1.55589e-11	3.06104e-11	2.44076e-11	2.94636e-11	2.23904e-11	1.92353e-11	2.05694e-11	1.62378e-11	2.69564e-11	2.2737e-11	1.92049e-11	1.99386e-11	2.35561e-11	2.17536e-11	1.78406e-11	1.57765e-11	1.82392e-11	2.18658e-11
12.22	1.97543e-11	2.30563e-11	2.14916e-11	2.14916e-11	2.71251e-11	2.19895e-11	2.56058e-11	2.32476e-11	2.22309e-11	3.31446e-11	1.99966e-11	1.55624e-11	3.0614e-11	2.44073e-11	2.94654e-11	2.23883e-11	1.92373e-11	2.05713e-11	1.62452e-11	2.69454e-11	2.275e-11	1.92052e-11	1.9941e-11	2.356e-11	2.17594e-11	1.7847e-11	1.57702e-11	1.82382e-11	2.18578e-11
12.24	1.97473e-11	2.3056e-11	2.14912e-11	2.14912e-11	2.71133e-11	2.19844e-11	2.56036e-11	2.32572e-11	2.22313e-11	3.31452e-11	2.00002e-11	1.55581e-11	3.06156e-11	2.44011e-11	2.94647e-11	2.23917e-11	1.92267e-11	2.05648e-11	1.62353e-11	2.69221e-11	2.27512e-11	1.92049e-11	1.9936e-11	2.35586e-11	2.17514e-11	1.78435e-11	1.57757e-11	1.82365e-11	2.18565e-11
12.26	1.97488e-11	2.30511e-11	2.14927e-11	2.14927e-11	2.71206e-11	2.19777e-11	2.56026e-11	2.3253e-11	2.22288e-11	3.31489e-11	1.99934e-11	1.55616e-11	3.0612e-11	2.44047e-11	2.94684e-11	2.23896e-11	1.92335e-11	2.05648e-11	1.62203e-11	2.69399e-11	2.274e-11	1.9201e-11	1.99418e-11	2.35605e-11	2.17547e-11	1.78438e-11	1.57694e-11	1.82422e-11	2.18546e-11
12.28	1.97441e-11	2.30528e-11	2.14819e-11	2.14819e-11	2.71231e-11	2.19866e-11	2.55927e-11	2.32546e-11	2.22333e-11	3.31476e-11	1.99942e-11	1.55603e-11	3.0612e-11	2.44052e-11	2.94648e-11	2.23934e-11	1.923e-11	2.05601e-11	1.6231e-11	2.68988e-11	2.2746e-11	1.92098e-11	1.99411e-11	2.35582e-11	2.17542e-11	1.78429e-11	1.57562e-11	1.82375e-11	2.18539e-11
12.3	1.97413e-11	2.30519e-11	2.14839e-11	2.14839e-11	2.71224e-11	2.19832e-11	2.55988e-11	2.32563e-11	2.22292e-11	3.31478e-11	2.00041e-11	1.55596e-11	3.06112e-11	2.44048e-11	2.94724e-11	2.2388e-11	1.92288e-11	2.05654e-11	1.62131e-11	2.69264e-11	2.27476e-11	1.92078e-11	1.99406e-11	2.3552e-11	2.17561e-11	1.78491e-11	1.57722e-11	1.82298e-11	2.18536e-11
12.32	1.97353e-11	2.30521e-11	2.14867e-11	2.14867e-11	2.71202e-11	2.19834e-11	2.56061e-11	2.32549e-11	2.22323e-11	3.31485e-11	1.99916e-11	1.55564e-11	3.06155e-11	2.44037e-11	2.9465e-11	2.23909e-11	1.92294e-11	2.05627e-11	1.62193e-11	2.69391e-11	2.2745e-11	1.92097e-11	1.99406e-11	2.35578e-11	2.1762e-11	1.78416e-11	1.57669e-11	1.82417e-11	2.18586e-11
12.34	1.97433e-11	2.30506e-11	2.14863e-11	2.14863e-11	2.71183e-11	2.19846e-11	2.55985e-11	2.32551e-11	2.22336e-11	3.31483e-11	2.00001e-11	1.55615e-11	3.06149e-11	2.44066e-11	2.94626e-11	2.23931e-11	1.92324e-11	2.05675e-11	1.62088e-11	2.69364e-11	2.27424e-11	1.92118e-11	1.99395e-11	2.35613e-11	2.17607e-11	1.78625e-11	1.57667e-11	1.82406e-11	2.1856e-11
12.36	1.97437e-11	2.30595e-11	2.1489e-11	2.1489e-11	2.7115e-11	2.19757e-11	2.55992e-11	2.32536e-11	2.2232e-11	3.31413e-11	1.99956e-11	1.55623e-11	3.06157e-11	2.44052e-11	2.94642e-11	2.23944e-11	1.92349e-11	2.05703e-11	1.62213e-11	2.69232e-11	2.27371e-11	1.92126e-11	1.99397e-11	2.35598e-11	2.17618e-11	1.78488e-11	1.57679e-11	1.82438e-11	2.18578e-11
12.38	1.97311e-11	2.30489e-11	2.14868e-11	2.14868e-11	2.71202e-11	2.19817e-11	2.55994e-11	2.32474e-11	2.22332e-11	3.3152e-11	1.99949e-11	1.55592e-11	3.06151e-11	2.44033e-11	2.94695e-11	2.23961e-11	1.92375e-11	2.05608e-11	1.6222e-11	2.69154e-11	2.27453e-11	1.92075e-11	1.9942e-11	2.35603e-11	2.17597e-11	1.78551e-11	1.57713e-11	1.82368e-11	2.18654e-11
12.4	1.97333e-11	2.30501e-11	2.14874e-11	2.14874e-11	2.71182e-11	2.19798e-11	2.55969e-11	2.32475e-11	2.2232e-11	3.31495e-11	1.99941e-11	1.55656e-11	3.06136e-11	2.44033e-11	2.947e-11	2.23936e-11	1.92277e-11	2.05642e-11	1.62145e-11	2.69357e-11	2.27385e-11	1.92083e-11	1.99403e-11	2.35554e-11	2.17578e-11	1.78508e-11	1.57663e-11	1.82348e-11	2.1855e-11
12.42	1.97374e-11	2.30525e-11	2.14856e-11	2.14856e-11	2.71168e-11	2.1986e-11	2.55987e-11	2.32497e-11	2.22346e-11	3.31407e-11	1.99916e-11	1.55639e-11	3.06092e-11	2.44087e-11	2.94694e-11	2.23903e-11	1.92325e-11	2.05684e-11	1.62276e-11	2.69018e-11	2.27349e-11	1.92033e-11	1.9944e-11	2.35545e-11	2.17635e-11	1.78517e-11	1.57678e-11	1.82361e-11	2.18524e-11
12.44	1.97327e-11	2.30498e-11	2.14865e-11	2.14865e-11	2.71214e-11	2.19896e-11	2.55949e-11	2.32457e-11	2.2237e-11	3.31443e-11	1.99964e-11	1.55609e-11	3.06117e-11	2.44037e-11	2.94655e-11	2.23892e-11	1.92294e-11	2.05687e-11	1.62209e-11	2.694e-11	2.27468e-11	1.92083e-11	1.99421e-11	2.35539e-11	2.17533e-11	1.78544e-11	1.57721e-11	1.82326e-11	2.18566e-11
12.46	1.97346e-11	2.30501e-11	2.14891e-11	2.14891e-11	2.7121e-11	2.19884e-11	2.55962e-11	2.3245e-11	2.2228e-11	3.31442e-11	1.99942e-11	1.55648e-11	3.06169e-11	2.44037e-11	2.94669e-11	2.23889e-11	1.9236e-11	2.05705e-11	1.62276e-11	2.69207e-11	2.27383e-11	1.92087e-11	1.99426e-11	2.35514e-11	2.17553e-11	1.78564e-11	1.57756e-11	1.82338e-11	2.18495e-11
12.48	1.97297e-11	2.30546e-11	2.14926e-11	2.14926e-11	2.71223e-11	2.19812e-11	2.55958e-11	2.32454e-11	2.22323e-11	3.31439e-11	1.99924e-11	1.55625e-11	3.06225e-11	2.44003e-11	2.94666e-11	2.23922e-11	1.92313e-11	2.05634e-11	1.62172e-11	2.68903e-11	2.27357e-11	1.9206e-11	1.99413e-11	2.35526e-11	2.17572e-11	1.78522e-11	1.57659e-11	1.82404e-11	2.18565e-11
12.5	1.97214e-11	2.30512e-11	2.14891e-11	2.14891e-11	2.71189e-11	2.19894e-11	2.55981e-11	2.32495e-11	2.22312e-11	3.31484e-11	1.99968e-11	1.55607e-11	3.0625e-11	2.44018e-11	2.94633e-11	2.23867e-11	1.9235e-11	2.05666e-11	1.62193e-11	2.69431e-11	2.27361e-11	1.92053e-11	1.99399e-11	2.35466e-11	2.17611e-11	1.78572e-11	1.57711e-11	1.82429e-11	2.18571e-11
12.52	1.97233e-11	2.30504e-11	2.14805e-11	2.14805e-11	2.7118e-11	2.19884e-11	2.55987e-11	2.32446e-11	2.22307e-11	3.31427e-11	2.00009e-11	1.55647e-11	3.06125e-11	2.44051e-11	2.94715e-11	2.2393e-11	1.92353e-11	2.05725e-11	1.62148e-11	2.69331e-11	2.27346e-11	1.92074e-11	1.99411e-11	2.35486e-11	2.17582e-11	1.78634e-11	1.57597e-11	1.82302e-11	2.18618e-11
12.54	1.97219e-11	2.30521e-11	2.14828e-11	2.14828e-11	2.71229e-11	2.19838e-11	2.55933e-11	2.32452e-11	2.2234e-11	3.31391e-11	1.99949e-11	1.55598e-11	3.06181e-11	2.44018e-11	2.94673e-11	2.23925e-11	1.92357e-11	2.05676e-11	1.62235e-11	2.69187e-11	2.27392e-11	1.92055e-11	1.99427e-11	2.35482e-11	2.17619e-11	1.78474e-11	1.57697e-11	1.82331e-11	2.18635e-11
12.56	1.97153e-11	2.30457e-11	2.149e-11	2.149e-11	2.71199e-11	2.19836e-11	2.55951e-11	2.32445e-11	2.22321e-11	3.31376e-11	2.00022e-11	1.55631e-11	3.06128e-11	2.44017e-11	2.94696e-11	2.2392e-11	1.92333e-11	2.05681e-11	1.6222e-11	2.69313e-11	2.27352e-11	1.92078e-11	1.99401e-11	2.35509e-11	2.17587e-11	1.78574e-11	1.57603e-11	1.82404e-11	2.18545e-11
12.58	1.97143e-11	2.3052e-11	2.14867e-11	2.14867e-11	2.71208e-11	2.19859e-11	2.56033e-11	2.32434e-11	2.22274e-11	3.31448e-11	1.99969e-11	1.55595e-11	3.06122e-11	2.44039e-11	2.94614e-11	2.23955e-11	1.92316e-11	2.05651e-11	1.62175e-11	2.69191e-11	2.27463e-11	1.92102e-11	1.99432e-11	2.35554e-11	2.17587e-11	1.78527e-11	1.57632e-11	1.82437e-11	2.18609e-11
12.6	1.97187e-11	2.30506e-11	2.14832e-11	2.14832e-11	2.71215e-11	2.19836e-11	2.56019e-11	2.32434e-11	2.2228e-11	3.31396e-11	1.99965e-11	1.55631e-11	3.06172e-11	2.44016e-11	2.94697e-11	2.23915e-11	1.92304e-11	2.05636e-11	1.62222e-11	2.69382e-11	2.27396e-11	1.92102e-11	1.99412e-11	2.35494e-11	2.17556e-11	1.78464e-11	1.57653e-11	1.82318e-11	2.18609e-11
12.62	1.97136e-11	2.30484e-11	2.14862e-11	2.14862e-11	2.71188e-11	2.19867e-11	2.55984e-11	2.32478e-11	2.22284e-11	3.31392e-11	1.99986e-11	1.55607e-11	3.06149e-11	2.44022e-11	2.94732e-11	2.23925e-11	1.92386e-11	2.05553e-11	1.62343e-11	2.69253e-11	2.2744e-11	1.92081e-11	1.99415e-11	2.35515e-11	2.17564e-11	1.78401e-11	1.57683e-11	1.82432e-11	2.18582e-11
12.64	1.97096e-11	2.30502e-11	2.14874e-11	2.14874e-11	2.71253e-11	2.19838e-11	2.55983e-11	2.32469e-11	2.22289e-11	3.31316e-11	2.00005e-11	1.55625e-11	3.06172e-11	2.44052e-11	2.94692e-11	2.23924e-11	1.92335e-11	2.05593e-11	1.62223e-11	2.69053e-11	2.27395e-11	1.92044e-11	1.99396e-11	2.35529e-11	2.17612e-11	1.78586e-11	1.57654e-11	1.82321e-11	2.18543e-11
12.66	1.97084e-11	2.30451e-11	2.14865e-11	2.14865e-11	2.71218e-11	2.19824e-11	2.55994e-11	2.32492e-11	2.22358e-11	3.31468e-11	1.99986e-11	1.55588e-11	3.06133e-11	2.44036e-11	2.94688e-11	2.23951e-11	1.92281e-11	2.05515e-11	1.62267e-11	2.69113e-11	2.2745e-11	1.92128e-11	1.99383e-11	2.35503e-11	2.17594e-11	1.78608e-11	1.57701e-11	1.82384e-11	2.18535e-11
12.68	1.97051e-11	2.30496e-11	2.14905e-11	2.14905e-11	2.71241e-11	2.19849e-11	2.56042e-11	2.32453e-11	2.224e-11	3.31423e-11	1.99987e-11	1.55627e-11	3.06137e-11	2.43988e-11	2.94663e-11	2.23928e-11	1.92327e-11	2.0561e-11	1.62186e-11	2.68922e-11	2.27504e-11	1.92094e-11	1.99427e-11	2.35486e-11	2.17491e-11	1.78648e-11	1.5764e-11	1.82405e-11	2.18617e-11
12.7	1.97023e-11	2.30468e-11	2.14904e-11	2.14904e-11	2.71204e-11	2.19882e-11	2.55964e-11	2.32419e-11	2.2232e-11	3.31393e-11	1.99986e-11	1.55635e-11	3.06112e-11	2.44014e-11	2.94696e-11	2.23914e-11	1.92343e-11	2.05577e-11	1.62321e-11	2.69235e-11	2.27431e-11	1.92109e-11	1.99455e-11	2.35485e-11	2.17506e-11	1.78693e-11	1.57697e-11	1.82409e-11	2.18612e-11
12.72	1.97008e-11	2.30425e-11	2.1488e-11	2.1488e-11	2.71216e-11	2.1991e-11	2.56033e-11	2.32464e-11	2.2231e-11	3.31366e-11	2.00044e-11	1.55619e-11	3.06198e-11	2.44018e-11	2.94683e-11	2.23918e-11	1.92357e-11	2.05622e-11	1.62403e-11	2.69272e-11	2.27461e-11	1.92079e-11	1.99437e-11	2.35501e-11	2.17544e-11	1.78683e-11	1.57708e-11	1.82473e-11	2.18557e-11
12.74	1.96999e-11	2.30323e-11	2.14878e-11	2.14878e-11	2.71246e-11	2.19823e-11	2.56001e-11	2.32418e-11	2.22361e-11	3.31482e-11	1.99984e-11	1.55615e-11	3.06126e-11	2.43999e-11	2.94706e-11	2.23894e-11	1.92347e-11	2.05556e-11	1.62303e-11	2.68993e-11	2.27519e-11	1.92065e-11	1.99408e-11	2.35432e-11	2.17635e-11	1.78658e-11	1.57756e-11	1.82371e-11	2.18622e-11
12.76	1.97008e-11	2.30194e-11	2.14892e-11	2.14892e-11	2.71172e-11	2.19893e-11	2.55954e-11	2.3247e-11	2.22332e-11	3.31439e-11	1.99999e-11	1.55614e-11	3.0614e-11	2.43994e-11	2.94779e-11	2.2391e-11	1.92323e-11	2.05599e-11	1.62271e-11	2.69118e-11	2.274e-11	1.92099e-11	1.9941e-11	2.35495e-11	2.17575e-11	1.78647e-11	1.57717e-11	1.82352e-11	2.18561e-11
12.78	1.96922e-11	2.30058e-11	2.14865e-11	2.14865e-11	2.71236e-11	2.19864e-11	2.55997e-11	2.32396e-11	2.22299e-11	3.314e-11	2.00003e-11	1.55607e-11	3.06162e-11	2.4403e-11	2.94725e-11	2.23911e-11	1.9238e-11	2.05529e-11	1.62326e-11	2.69089e-11	2.27422e-11	1.92059e-11	1.99436e-11	2.35438e-11	2.17623e-11	1.78717e-11	1.57571e-11	1.82399e-11	2.18518e-11
12.8	1.96915e-11	2.29916e-11	2.14869e-11	2.14869e-11	2.71187e-11	2.19876e-11	2.55979e-11	2.32471e-11	2.22297e-11	3.31386e-11	1.99987e-11	1.55651e-11	3.06144e-11	2.44104e-11	2.94668e-11	2.23869e-11	1.92261e-11	2.05494e-11	1.62227e-11	2.69716e-11	2.27418e-11	1.92102e-11	1.99447e-11	2.35481e-11	2.17562e-11	1.78796e-11	1.57671e-11	1.82324e-11	2.18587e-11
12.82	1.96863e-11	2.29835e-11	2.1486e-11	2.1486e-11	2.71241e-11	2.19843e-11	2.55962e-11	2.32374e-11	2.22335e-11	3.3139e-11	1.99973e-11	1.55591e-11	3.06163e-11	2.44061e-11	2.94733e-11	2.23944e-11	1.92294e-11	2.0555e-11	1.62295e-11	2.69338e-11	2.27427e-11	1.92093e-11	1.99411e-11	2.35446e-11	2.17458e-11	1.78592e-11	1.5769e-11	1.82392e-11	2.18555e-11
12.84	1.96932e-11	2.29747e-11	2.1488e-11	2.1488e-11	2.71178e-11	2.19814e-11	2.56004e-11	2.32438e-11	2.22306e-11	3.31427e-11	1.99959e-11	1.55618e-11	3.06164e-11	2.44038e-11	2.9474e-11	2.23927e-11	1.92282e-11	2.05557e-11	1.6225e-11	2.69042e-11	2.27411e-11	1.92096e-11	1.99459e-11	2.35487e-11	2.17548e-11	1.78497e-11	1.5772e-11	1.82391e-11	2.18643e-11
12.86	1.96844e-11	2.29696e-11	2.14846e-11	2.14846e-11	2.71243e-11	2.19768e-11	2.56009e-11	2.32369e-11	2.2225e-11	3.3143e-11	1.99919e-11	1.55638e-11	3.06136e-11	2.44095e-11	2.94713e-11	2.23944e-11	1.92298e-11	2.05604e-11	1.62237e-11	2.68923e-11	2.27453e-11	1.9209e-11	1.99434e-11	2.35456e-11	2.17636e-11	1.78616e-11	1.57645e-11	1.82393e-11	2.18651e-11
12.88	1.96928e-11	2.29609e-11	2.14901e-11	2.14901e-11	2.71248e-11	2.19734e-11	2.55982e-11	2.32456e-11	2.22279e-11	3.31409e-11	1.99944e-11	1.55653e-11	3.06203e-11	2.44043e-11	2.94717e-11	2.23909e-11	1.92307e-11	2.056e-11	1.62383e-11	2.69087e-11	2.27416e-11	1.92088e-11	1.99403e-11	2.35387e-11	2.17634e-11	1.78721e-11	1.57676e-11	1.82339e-11	2.18555e-11
12.9	1.96886e-11	2.29588e-11	2.14874e-11	2.14874e-11	2.71228e-11	2.19871e-11	2.55997e-11	2.32423e-11	2.22264e-11	3.31442e-11	1.99953e-11	1.55601e-11	3.06198e-11	2.44067e-11	2.94685e-11	2.23933e-11	1.92291e-11	2.05624e-11	1.62421e-11	2.69139e-11	2.27446e-11	1.92157e-11	1.99429e-11	2.35405e-11	2.17584e-11	1.78683e-11	1.57702e-11	1.82369e-11	2.18576e-11
12.92	1.96849e-11	2.29536e-11	2.14825e-11	2.14825e-11	2.71232e-11	2.19746e-11	2.55999e-11	2.32424e-11	2.22268e-11	3.31388e-11	1.99951e-11	1.55512e-11	3.0617e-11	2.44093e-11	2.94715e-11	2.23893e-11	1.92267e-11	2.056e-11	1.62372e-11	2.69111e-11	2.27407e-11	1.921e-11	1.99457e-11	2.35392e-11	2.17585e-11	1.78664e-11	1.57738e-11	1.82429e-11	2.18612e-11
12.94	1.96842e-11	2.29523e-11	2.1493e-11	2.1493e-11	2.71223e-11	2.19817e-11	2.56001e-11	2.32393e-11	2.22303e-11	3.31443e-11	1.99944e-11	1.55611e-11	3.06145e-11	2.44055e-11	2.94703e-11	2.2388e-11	1.92273e-11	2.0567e-11	1.62452e-11	2.69081e-11	2.27423e-11	1.92099e-11	1.99415e-11	2.35461e-11	2.17656e-11	1.78883e-11	1.57713e-11	1.82386e-11	2.18564e-11
12.96	1.96775e-11	2.29585e-11	2.14859e-11	2.14859e-11	2.71193e-11	2.19828e-11	2.55974e-11	2.32351e-11	2.22318e-11	3.31406e-11	1.99981e-11	1.55633e-11	3.06196e-11	2.44025e-11	2.94663e-11	2.23995e-11	1.92263e-11	2.05669e-11	1.62226e-11	2.69448e-11	2.27479e-11	1.92146e-11	1.99446e-11	2.35403e-11	2.17555e-11	1.78795e-11	1.5771e-11	1.8236e-11	2.18603e-11
12.98	1.96797e-11	2.29551e-11	2.14898e-11	2.14898e-11	2.71196e-11	2.19777e-11	2.55976e-11	2.32376e-11	2.22313e-11	3.31475e-11	1.99962e-11	1.55588e-11	3.06139e-11	2.44006e-11	2.94706e-11	2.23928e-11	1.92301e-11	2.05632e-11	1.62299e-11	2.69023e-11	2.27374e-11	1.92049e-11	1.99374e-11	2.35425e-11	2.17601e-11	1.78737e-11	1.57687e-11	1.82396e-11	2.18555e-11
13	1.96835e-11	2.29546e-11	2.14835e-11	2.14835e-11	2.71196e-11	2.19801e-11	2.56004e-11	2.32355e-11	2.22334e-11	3.31501e-11	1.99967e-11	1.55552e-11	3.06202e-11	2.44059e-11	2.94715e-11	2.23952e-11	1.92306e-11	2.05638e-11	1.62269e-11	2.69154e-11	2.27448e-11	1.92067e-11	1.99414e-11	2.35382e-11	2.17593e-11	1.78809e-11	1.57666e-11	1.82367e-11	2.18665e-11
13.02	1.9675e-11	2.29595e-11	2.14925e-11	2.14925e-11	2.71169e-11	2.19831e-11	2.56002e-11	2.32413e-11	2.22256e-11	3.31449e-11	2.00025e-11	1.55635e-11	3.06165e-11	2.44061e-11	2.94734e-11	2.23879e-11	1.92283e-11	2.05586e-11	1.62138e-11	2.68987e-11	2.27411e-11	1.921e-11	1.99423e-11	2.35386e-11	2.17513e-11	1.7882e-11	1.57541e-11	1.82348e-11	2.18624e-11
13.04	1.96715e-11	2.29578e-11	2.14867e-11	2.14867e-11	2.71197e-11	2.19768e-11	2.56018e-11	2.32336e-11	2.22257e-11	3.31475e-11	1.99967e-11	1.55657e-11	3.06144e-11	2.44047e-11	2.94699e-11	2.23958e-11	1.92298e-11	2.05589e-11	1.62193e-11	2.6872e-11	2.2739e-11	1.92081e-11	1.99486e-11	2.35363e-11	2.17662e-11	1.78696e-11	1.57689e-11	1.82368e-11	2.18663e-11
13.06	1.96708e-11	2.29525e-11	2.14935e-11	2.14935e-11	2.71228e-11	2.19755e-11	2.55943e-11	2.32372e-11	2.22271e-11	3.31395e-11	1.99993e-11	1.55668e-11	3.06152e-11	2.4401e-11	2.94713e-11	2.23936e-11	1.92235e-11	2.05597e-11	1.62216e-11	2.68997e-11	2.27362e-11	1.92143e-11	1.99444e-11	2.35414e-11	2.17533e-11	1.78744e-11	1.57722e-11	1.8236e-11	2.18573e-11
13.08	1.96672e-11	2.29566e-11	2.14927e-11	2.14927e-11	2.71223e-11	2.19792e-11	2.56004e-11	2.32359e-11	2.2227e-11	3.31466e-11	2.00035e-11	1.55678e-11	3.06184e-11	2.4402e-11	2.94739e-11	2.23938e-11	1.92279e-11	2.05577e-11	1.62294e-11	2.69193e-11	2.27417e-11	1.92127e-11	1.99473e-11	2.35434e-11	2.17536e-11	1.78831e-11	1.57619e-11	1.82294e-11	2.18652e-11
13.1	1.96643e-11	2.29631e-11	2.14899e-11	2.14899e-11	2.71263e-11	2.19759e-11	2.55959e-11	2.32334e-11	2.22263e-11	3.31497e-11	2.00006e-11	1.55633e-11	3.06204e-11	2.43982e-11	2.94677e-11	2.23944e-11	1.92292e-11	2.05638e-11	1.62319e-11	2.6925e-11	2.27396e-11	1.9212e-11	1.99446e-11	2.35364e-11	2.17503e-11	1.78767e-11	1.57674e-11	1.82411e-11	2.18583e-11
13.12	1.96674e-11	2.29604e-11	2.14871e-11	2.14871e-11	2.71328e-11	2.19773e-11	2.55988e-11	2.32383e-11	2.2232e-11	3.31466e-11	2.00001e-11	1.55674e-11	3.06157e-11	2.44029e-11	2.94736e-11	2.23917e-11	1.92252e-11	2.05614e-11	1.6232e-11	2.69043e-11	2.27391e-11	1.92085e-11	1.9945e-11	2.35395e-11	2.17577e-11	1.78682e-11	1.57578e-11	1.82389e-11	2.18529e-11
13.14	1.96589e-11	2.2961e-11	2.14889e-11	2.14889e-11	2.712e-11	2.19738e-11	2.56015e-11	2.32313e-11	2.22288e-11	3.31443e-11	2.00028e-11	1.55615e-11	3.06148e-11	2.4404e-11	2.94778e-11	2.23901e-11	1.92323e-11	2.05608e-11	1.62297e-11	2.6905e-11	2.27436e-11	1.921e-11	1.99423e-11	2.35341e-11	2.1763e-11	1.7852e-11	1.57764e-11	1.82404e-11	2.18573e-11
13.16	1.9661e-11	2.29574e-11	2.14838e-11	2.14838e-11	2.71259e-11	2.1976e-11	2.56016e-11	2.32362e-11	2.2233e-11	3.31439e-11	1.99946e-11	1.55604e-11	3.06202e-11	2.4411e-11	2.94772e-11	2.2388e-11	1.92322e-11	2.05652e-11	1.62309e-11	2.69467e-11	2.27393e-11	1.92097e-11	1.99409e-11	2.35328e-11	2.17654e-11	1.78375e-11	1.57628e-11	1.82415e-11	2.18657e-11
13.18	1.9659e-11	2.29626e-11	2.14935e-11	2.14935e-11	2.71226e-11	2.1978e-11	2.55991e-11	2.32394e-11	2.22294e-11	3.31451e-11	1.99963e-11	1.55632e-11	3.06174e-11	2.43983e-11	2.94707e-11	2.23943e-11	1.9225e-11	2.05616e-11	1.62398e-11	2.69369e-11	2.27417e-11	1.92134e-11	1.99465e-11	2.35374e-11	2.17564e-11	1.78403e-11	1.57667e-11	1.8243e-11	2.18577e-11
13.2	1.96588e-11	2.29615e-11	2.14875e-11	2.14875e-11	2.71208e-11	2.1976e-11	2.55986e-11	2.32321e-11	2.22261e-11	3.31483e-11	2.00032e-11	1.55606e-11	3.06186e-11	2.44082e-11	2.9473e-11	2.23925e-11	1.92354e-11	2.05666e-11	1.62427e-11	2.69195e-11	2.27471e-11	1.92051e-11	1.99402e-11	2.35337e-11	2.17602e-11	1.7848e-11	1.57682e-11	1.82435e-11	2.18604e-11
13.22	1.96584e-11	2.2955e-11	2.14933e-11	2.14933e-11	2.71246e-11	2.19759e-11	2.55997e-11	2.32345e-11	2.2233e-11	3.31484e-11	2.00018e-11	1.55633e-11	3.06163e-11	2.44071e-11	2.94756e-11	2.23898e-11	1.92298e-11	2.05658e-11	1.62346e-11	2.69236e-11	2.27454e-11	1.92055e-11	1.9942e-11	2.35361e-11	2.17623e-11	1.78533e-11	1.57612e-11	1.82367e-11	2.18597e-11
13.24	1.96581e-11	2.29584e-11	2.14919e-11	2.14919e-11	2.71227e-11	2.19743e-11	2.56051e-11	2.32359e-11	2.22331e-11	3.31425e-11	2.00034e-11	1.55541e-11	3.06184e-11	2.44007e-11	2.94729e-11	2.23918e-11	1.92326e-11	2.05685e-11	1.623e-11	2.68886e-11	2.27473e-11	1.92036e-11	1.9943e-11	2.35356e-11	2.17576e-11	1.78438e-11	1.57678e-11	1.82411e-11	2.18666e-11
13.26	1.96531e-11	2.29591e-11	2.1495e-11	2.1495e-11	2.71188e-11	2.1975e-11	2.56026e-11	2.32408e-11	2.22348e-11	3.31424e-11	1.99983e-11	1.55616e-11	3.06165e-11	2.44086e-11	2.94761e-11	2.23906e-11	1.92276e-11	2.0566e-11	1.62344e-11	2.6902e-11	2.27471e-11	1.92122e-11	1.99462e-11	2.3535e-11	2.17547e-11	1.78537e-11	1.57663e-11	1.82419e-11	2.18607e-11
13.28	1.96493e-11	2.29559e-11	2.14915e-11	2.14915e-11	2.71212e-11	2.19687e-11	2.56022e-11	2.32365e-11	2.22327e-11	3.3147e-11	1.99987e-11	1.55625e-11	3.06144e-11	2.44001e-11	2.94767e-11	2.23936e-11	1.9227e-11	2.05612e-11	1.62312e-11	2.68827e-11	2.27382e-11	1.92149e-11	1.99475e-11	2.35327e-11	2.17539e-11	1.78564e-11	1.57711e-11	1.82364e-11	2.18667e-11
13.3	1.96498e-11	2.29588e-11	2.14838e-11	2.14838e-11	2.71239e-11	2.19812e-11	2.56022e-11	2.32347e-11	2.22296e-11	3.31449e-11	2.00003e-11	1.55618e-11	3.06154e-11	2.44023e-11	2.94761e-11	2.23883e-11	1.92284e-11	2.05645e-11	1.62282e-11	2.6913e-11	2.27465e-11	1.92149e-11	1.9942e-11	2.35294e-11	2.17622e-11	1.78564e-11	1.57659e-11	1.82399e-11	2.18597e-11
13.32	1.96508e-11	2.29678e-11	2.149e-11	2.149e-11	2.712e-11	2.19744e-11	2.56029e-11	2.32324e-11	2.22304e-11	3.31443e-11	2.00007e-11	1.55591e-11	3.06113e-11	2.43984e-11	2.94773e-11	2.23913e-11	1.92346e-11	2.05672e-11	1.6235e-11	2.69025e-11	2.2743e-11	1.92061e-11	1.99409e-11	2.35289e-11	2.17591e-11	1.78734e-11	1.57585e-11	1.82409e-11	2.18537e-11
13.34	1.96509e-11	2.29631e-11	2.14894e-11	2.14894e-11	2.71197e-11	2.19799e-11	2.56025e-11	2.32351e-11	2.2229e-11	3.31446e-11	2.00017e-11	1.55603e-11	3.06164e-11	2.4406e-11	2.94734e-11	2.23906e-11	1.92313e-11	2.0568e-11	1.6234e-11	2.68945e-11	2.27407e-11	1.92115e-11	1.99445e-11	2.35318e-11	2.17597e-11	1.78696e-11	1.57741e-11	1.82442e-11	2.18692e-11
13.36	1.96511e-11	2.29625e-11	2.14906e-11	2.14906e-11	2.71206e-11	2.19729e-11	2.55947e-11	2.32355e-11	2.22264e-11	3.31447e-11	1.99992e-11	1.55615e-11	3.06152e-11	2.44016e-11	2.94721e-11	2.23863e-11	1.92303e-11	2.05727e-11	1.62321e-11	2.69068e-11	2.27365e-11	1.9215e-11	1.99433e-11	2.35316e-11	2.17584e-11	1.78686e-11	1.57681e-11	1.82405e-11	2.18601e-11
13.38	1.96454e-11	2.29552e-11	2.14886e-11	2.14886e-11	2.71216e-11	2.19892e-11	2.55954e-11	2.32334e-11	2.22233e-11	3.31439e-11	2.00019e-11	1.55605e-11	3.06207e-11	2.44044e-11	2.94745e-11	2.23925e-11	1.92309e-11	2.05739e-11	1.62342e-11	2.68933e-11	2.27444e-11	1.92118e-11	1.99473e-11	2.3533e-11	2.17566e-11	1.7873e-11	1.57693e-11	1.8232e-11	2.18634e-11
13.4	1.96475e-11	2.29599e-11	2.149e-11	2.149e-11	2.71285e-11	2.19859e-11	2.55971e-11	2.32367e-11	2.22258e-11	3.31404e-11	1.99951e-11	1.55643e-11	3.06276e-11	2.44042e-11	2.94739e-11	2.23862e-11	1.92316e-11	2.05781e-11	1.62297e-11	2.68913e-11	2.27422e-11	1.92095e-11	1.99441e-11	2.35352e-11	2.17594e-11	1.78756e-11	1.57655e-11	1.82361e-11	2.18635e-11
13.42	1.96456e-11	2.2961e-11	2.14919e-11	2.14919e-11	2.71198e-11	2.19788e-11	2.56032e-11	2.32377e-11	2.22317e-11	3.31492e-11	1.9999e-11	1.5561e-11	3.06165e-11	2.4406e-11	2.94717e-11	2.23921e-11	1.92294e-11	2.05759e-11	1.62338e-11	2.68965e-11	2.27417e-11	1.9206e-11	1.9948e-11	2.35343e-11	2.17622e-11	1.78709e-11	1.57788e-11	1.82378e-11	2.18657e-11
13.44	1.96406e-11	2.29601e-11	2.14877e-11	2.14877e-11	2.71265e-11	2.19736e-11	2.55984e-11	2.32348e-11	2.22321e-11	3.31484e-11	2.00011e-11	1.5566e-11	3.06176e-11	2.43984e-11	2.94752e-11	2.23929e-11	1.92316e-11	2.05731e-11	1.62361e-11	2.6872e-11	2.27292e-11	1.92144e-11	1.99463e-11	2.35305e-11	2.1754e-11	1.78738e-11	1.57768e-11	1.82359e-11	2.18626e-11
13.46	1.96442e-11	2.29629e-11	2.14851e-11	2.14851e-11	2.71172e-11	2.1984e-11	2.56006e-11	2.32306e-11	2.2229e-11	3.3142e-11	1.99966e-11	1.55612e-11	3.06181e-11	2.44015e-11	2.94752e-11	2.23968e-11	1.92338e-11	2.05701e-11	1.62341e-11	2.68795e-11	2.27356e-11	1.92069e-11	1.99465e-11	2.3527e-11	2.17533e-11	1.7857e-11	1.57561e-11	1.82417e-11	2.18642e-11
13.48	1.9646e-11	2.29649e-11	2.14901e-11	2.14901e-11	2.71227e-11	2.19851e-11	2.56046e-11	2.32358e-11	2.22278e-11	3.31453e-11	2.00016e-11	1.55618e-11	3.06193e-11	2.44038e-11	2.94767e-11	2.23917e-11	1.92338e-11	2.05746e-11	1.62348e-11	2.68978e-11	2.27363e-11	1.92138e-11	1.99473e-11	2.35265e-11	2.17579e-11	1.78805e-11	1.57562e-11	1.82397e-11	2.18685e-11
13.5	1.96416e-11	2.29609e-11	2.14925e-11	2.14925e-11	2.7119e-11	2.19844e-11	2.56019e-11	2.3235e-11	2.22292e-11	3.31444e-11	2.00004e-11	1.55689e-11	3.06185e-11	2.44054e-11	2.9476e-11	2.23948e-11	1.92318e-11	2.05761e-11	1.6239e-11	2.68806e-11	2.27404e-11	1.92068e-11	1.99491e-11	2.35289e-11	2.17554e-11	1.788e-11	1.57733e-11	1.82381e-11	2.18683e-11
13.52	1.96399e-11	2.29617e-11	2.1492e-11	2.1492e-11	2.71252e-11	2.1975e-11	2.55975e-11	2.3233e-11	2.22332e-11	3.31461e-11	1.99971e-11	1.55627e-11	3.06143e-11	2.44029e-11	2.94754e-11	2.23905e-11	1.92278e-11	2.05696e-11	1.62279e-11	2.68831e-11	2.27431e-11	1.92123e-11	1.99485e-11	2.35304e-11	2.17581e-11	1.78881e-11	1.57687e-11	1.82397e-11	2.18624e-11
13.54	1.96352e-11	2.29647e-11	2.14915e-11	2.14915e-11	2.7123e-11	2.19747e-11	2.55983e-11	2.32276e-11	2.22259e-11	3.3153e-11	2.00043e-11	1.55644e-11	3.06201e-11	2.44082e-11	2.9476e-11	2.23919e-11	1.92332e-11	2.05719e-11	1.62216e-11	2.69068e-11	2.27444e-11	1.92049e-11	1.99469e-11	2.353e-11	2.17454e-11	1.78704e-11	1.57687e-11	1.82418e-11	2.18641e-11
13.56	1.96353e-11	2.29629e-11	2.14891e-11	2.14891e-11	2.71225e-11	2.19792e-11	2.56015e-11	2.32351e-11	2.22285e-11	3.31492e-11	2.00061e-11	1.55697e-11	3.06191e-11	2.44064e-11	2.94752e-11	2.23909e-11	1.92348e-11	2.05756e-11	1.62295e-11	2.68997e-11	2.27412e-11	1.92069e-11	1.99506e-11	2.35299e-11	2.17531e-11	1.78658e-11	1.57699e-11	1.82395e-11	2.18593e-11
13.58	1.96402e-11	2.29598e-11	2.14905e-11	2.14905e-11	2.71197e-11	2.19801e-11	2.56006e-11	2.32339e-11	2.22299e-11	3.31529e-11	2.00029e-11	1.55664e-11	3.06178e-11	2.44062e-11	2.94711e-11	2.23911e-11	1.92289e-11	2.05732e-11	1.62388e-11	2.69121e-11	2.27426e-11	1.92013e-11	1.9945e-11	2.35258e-11	2.17558e-11	1.7873e-11	1.57725e-11	1.82427e-11	2.18672e-11
13.6	1.96398e-11	2.29596e-11	2.14928e-11	2.14928e-11	2.71242e-11	2.19816e-11	2.55963e-11	2.32366e-11	2.22277e-11	3.31455e-11	2.00034e-11	1.55703e-11	3.06191e-11	2.44041e-11	2.94708e-11	2.23925e-11	1.92281e-11	2.05716e-11	1.62318e-11	2.68888e-11	2.27381e-11	1.92074e-11	1.99472e-11	2.35252e-11	2.17514e-11	1.78671e-11	1.57696e-11	1.82418e-11	2.1865e-11
13.62	1.96349e-11	2.29569e-11	2.14885e-11	2.14885e-11	2.71255e-11	2.19761e-11	2.5602e-11	2.32301e-11	2.22273e-11	3.314e-11	2.00043e-11	1.55631e-11	3.06126e-11	2.44038e-11	2.9476e-11	2.23915e-11	1.92287e-11	2.05643e-11	1.62331e-11	2.69065e-11	2.27487e-11	1.92085e-11	1.9948e-11	2.35267e-11	2.17567e-11	1.78738e-11	1.57774e-11	1.82476e-11	2.18641e-11
13.64	1.96349e-11	2.29623e-11	2.14885e-11	2.14885e-11	2.7122e-11	2.19718e-11	2.55973e-11	2.32329e-11	2.22257e-11	3.31408e-11	2.00068e-11	1.55631e-11	3.06173e-11	2.44052e-11	2.9476e-11	2.23878e-11	1.92316e-11	2.05617e-11	1.62402e-11	2.68916e-11	2.27434e-11	1.92096e-11	1.99497e-11	2.35256e-11	2.17547e-11	1.78756e-11	1.57653e-11	1.82408e-11	2.18535e-11
13.66	1.96473e-11	2.29601e-11	2.14911e-11	2.14911e-11	2.71241e-11	2.19816e-11	2.5603e-11	2.32333e-11	2.22247e-11	3.31557e-11	2.0005e-11	1.55593e-11	3.06151e-11	2.44012e-11	2.94774e-11	2.2387e-11	1.92267e-11	2.05721e-11	1.62342e-11	2.6891e-11	2.27459e-11	1.92066e-11	1.99495e-11	2.35248e-11	2.17526e-11	1.78862e-11	1.57655e-11	1.82433e-11	2.18594e-11
13.68	1.96376e-11	2.29642e-11	2.14887e-11	2.14887e-11	2.71213e-11	2.19744e-11	2.55972e-11	2.32257e-11	2.22297e-11	3.31473e-11	2.00034e-11	1.55604e-11	3.06235e-11	2.44128e-11	2.94734e-11	2.23909e-11	1.92322e-11	2.05659e-11	1.62366e-11	2.68784e-11	2.27444e-11	1.92049e-11	1.99464e-11	2.3527e-11	2.17557e-11	1.78739e-11	1.57623e-11	1.82418e-11	2.18697e-11
13.7	1.96357e-11	2.29587e-11	2.14862e-11	2.14862e-11	2.71254e-11	2.19841e-11	2.55981e-11	2.32332e-11	2.2221e-11	3.31533e-11	2.00006e-11	1.55686e-11	3.0622e-11	2.44044e-11	2.94746e-11	2.23917e-11	1.92349e-11	2.05689e-11	1.62235e-11	2.6886e-11	2.27428e-11	1.92092e-11	1.99499e-11	2.35223e-11	2.1751e-11	1.78903e-11	1.57715e-11	1.82381e-11	2.18659e-11
13.72	1.96347e-11	2.29593e-11	2.14958e-11	2.14958e-11	2.7125e-11	2.19824e-11	2.55943e-11	2.32352e-11	2.2229e-11	3.31393e-11	2.00005e-11	1.55677e-11	3.06179e-11	2.44014e-11	2.9475e-11	2.23941e-11	1.92317e-11	2.05676e-11	1.62233e-11	2.68702e-11	2.27461e-11	1.92115e-11	1.99459e-11	2.35228e-11	2.17522e-11	1.78801e-11	1.57581e-11	1.82366e-11	2.18596e-11
13.74	1.96366e-11	2.29607e-11	2.14944e-11	2.14944e-11	2.71166e-11	2.19801e-11	2.55966e-11	2.32355e-11	2.22255e-11	3.3152e-11	2.00054e-11	1.55621e-11	3.06158e-11	2.44015e-11	2.94725e-11	2.23947e-11	1.92317e-11	2.05745e-11	1.62183e-11	2.68868e-11	2.27493e-11	1.92076e-11	1.99459e-11	2.35238e-11	2.1754e-11	1.78767e-11	1.57595e-11	1.82417e-11	2.18637e-11
13.76	1.96299e-11	2.29642e-11	2.14887e-11	2.14887e-11	2.71197e-11	2.1978e-11	2.56048e-11	2.32305e-11	2.22329e-11	3.31402e-11	2.00028e-11	1.55654e-11	3.06198e-11	2.4404e-11	2.94792e-11	2.23974e-11	1.92291e-11	2.0573e-11	1.62304e-11	2.68958e-11	2.27432e-11	1.92099e-11	1.99412e-11	2.35208e-11	2.17607e-11	1.7874e-11	1.57607e-11	1.82406e-11	2.18669e-11
13.78	1.96343e-11	2.2964e-11	2.14884e-11	2.14884e-11	2.71185e-11	2.19827e-11	2.55995e-11	2.32328e-11	2.22272e-11	3.31512e-11	1.99993e-11	1.55628e-11	3.06125e-11	2.44023e-11	2.94687e-11	2.23964e-11	1.92266e-11	2.05678e-11	1.62269e-11	2.68867e-11	2.27382e-11	1.92079e-11	1.9948e-11	2.35192e-11	2.17581e-11	1.78872e-11	1.57763e-11	1.82391e-11	2.18532e-11
13.8	1.96317e-11	2.29656e-11	2.1494e-11	2.1494e-11	2.7121e-11	2.1976e-11	2.56016e-11	2.32288e-11	2.22253e-11	3.31456e-11	2.00044e-11	1.55682e-11	3.06174e-11	2.44064e-11	2.94845e-11	2.23916e-11	1.9228e-11	2.05734e-11	1.62362e-11	2.68864e-11	2.27506e-11	1.92134e-11	1.99456e-11	2.35255e-11	2.17589e-11	1.78839e-11	1.57697e-11	1.82381e-11	2.18649e-11
13.82	1.96333e-11	2.29687e-11	2.14909e-11	2.14909e-11	2.71217e-11	2.19819e-11	2.56005e-11	2.32242e-11	2.22341e-11	3.31531e-11	1.9999e-11	1.5563e-11	3.06144e-11	2.44062e-11	2.94757e-11	2.23921e-11	1.92292e-11	2.05673e-11	1.62362e-11	2.68993e-11	2.27441e-11	1.921e-11	1.99453e-11	2.35253e-11	2.17602e-11	1.78816e-11	1.57589e-11	1.82393e-11	2.18616e-11
13.84	1.96222e-11	2.2958e-11	2.14885e-11	2.14885e-11	2.71172e-11	2.19798e-11	2.56001e-11	2.32339e-11	2.22269e-11	3.31464e-11	2.00023e-11	1.55625e-11	3.0615e-11	2.44012e-11	2.94814e-11	2.23933e-11	1.92361e-11	2.05724e-11	1.62372e-11	2.68785e-11	2.27484e-11	1.92124e-11	1.99486e-11	2.35247e-11	2.17564e-11	1.78822e-11	1.57625e-11	1.82431e-11	2.18639e-11
13.86	1.96272e-11	2.29622e-11	2.1493e-11	2.1493e-11	2.71228e-11	2.19818e-11	2.55995e-11	2.32302e-11	2.22318e-11	3.3155e-11	2.0004e-11	1.55662e-11	3.06117e-11	2.44022e-11	2.94745e-11	2.23906e-11	1.92291e-11	2.0567e-11	1.62311e-11	2.68849e-11	2.27422e-11	1.92052e-11	1.99507e-11	2.35232e-11	2.17607e-11	1.78929e-11	1.57655e-11	1.82396e-11	2.18654e-11
13.88	1.96201e-11	2.29628e-11	2.14847e-11	2.14847e-11	2.71255e-11	2.19775e-11	2.56006e-11	2.32336e-11	2.22259e-11	3.31391e-11	2.00066e-11	1.55634e-11	3.06108e-11	2.4407e-11	2.94779e-11	2.23924e-11	1.92324e-11	2.0568e-11	1.6241e-11	2.68751e-11	2.27409e-11	1.92143e-11	1.99482e-11	2.35182e-11	2.17596e-11	1.78772e-11	1.57685e-11	1.82343e-11	2.18601e-11
13.9	1.96219e-11	2.29644e-11	2.14831e-11	2.14831e-11	2.71222e-11	2.1977e-11	2.56e-11	2.3227e-11	2.22251e-11	3.31499e-11	1.99991e-11	1.55623e-11	3.06143e-11	2.44072e-11	2.94712e-11	2.23916e-11	1.92287e-11	2.05572e-11	1.62321e-11	2.68915e-11	2.27455e-11	1.92157e-11	1.99467e-11	2.35167e-11	2.17516e-11	1.78809e-11	1.57691e-11	1.82387e-11	2.18638e-11
13.92	1.96193e-11	2.2963e-11	2.14871e-11	2.14871e-11	2.71223e-11	2.19759e-11	2.55949e-11	2.32321e-11	2.22288e-11	3.315e-11	2.00043e-11	1.55698e-11	3.0614e-11	2.44064e-11	2.94765e-11	2.23907e-11	1.92332e-11	2.05693e-11	1.62357e-11	2.68893e-11	2.27439e-11	1.92167e-11	1.99528e-11	2.35237e-11	2.17531e-11	1.78971e-11	1.57588e-11	1.8237e-11	2.1862e-11
13.94	1.96204e-11	2.29636e-11	2.14866e-11	2.14866e-11	2.7125e-11	2.19826e-11	2.56022e-11	2.32279e-11	2.22319e-11	3.31457e-11	2.00019e-11	1.55621e-11	3.06138e-11	2.4402e-11	2.94806e-11	2.23909e-11	1.92303e-11	2.05631e-11	1.62262e-11	2.68787e-11	2.27462e-11	1.92151e-11	1.99464e-11	2.35206e-11	2.17578e-11	1.78971e-11	1.57725e-11	1.82431e-11	2.18633e-11
13.96	1.96269e-11	2.29579e-11	2.14859e-11	2.14859e-11	2.71225e-11	2.19867e-11	2.55984e-11	2.32336e-11	2.22308e-11	3.31426e-11	2.00025e-11	1.55662e-11	3.06133e-11	2.44e-11	2.94784e-11	2.23935e-11	1.92279e-11	2.05623e-11	1.62251e-11	2.68677e-11	2.27469e-11	1.92083e-11	1.9943e-11	2.35184e-11	2.17503e-11	1.78907e-11	1.57635e-11	1.82405e-11	2.18622e-11
13.98	1.96266e-11	2.29614e-11	2.14954e-11	2.14954e-11	2.7119e-11	2.19834e-11	2.56002e-11	2.32332e-11	2.2226e-11	3.31496e-11	2.00036e-11	1.55614e-11	3.06129e-11	2.44014e-11	2.94794e-11	2.23967e-11	1.92361e-11	2.05615e-11	1.62247e-11	2.68579e-11	2.27349e-11	1.92065e-11	1.99464e-11	2.35229e-11	2.17601e-11	1.78885e-11	1.57686e-11	1.82444e-11	2.18577e-11
14	1.96197e-11	2.29594e-11	2.14909e-11	2.14909e-11	2.71192e-11	2.19791e-11	2.56015e-11	2.32254e-11	2.22291e-11	3.31507e-11	2.00024e-11	1.5558e-11	3.06172e-11	2.44023e-11	2.94772e-11	2.23919e-11	1.92296e-11	2.05634e-11	1.62327e-11	2.69114e-11	2.27393e-11	1.92095e-11	1.99465e-11	2.35185e-11	2.17547e-11	1.78787e-11	1.57634e-11	1.82351e-11	2.18622e-11
14.02	1.96218e-11	2.29638e-11	2.14878e-11	2.14878e-11	2.71254e-11	2.19846e-11	2.55962e-11	2.32272e-11	2.22291e-11	3.3146e-11	2.00012e-11	1.55619e-11	3.0616e-11	2.44067e-11	2.94731e-11	2.2397e-11	1.92347e-11	2.05636e-11	1.62245e-11	2.68606e-11	2.27402e-11	1.9211e-11	1.99451e-11	2.35174e-11	2.17596e-11	1.78794e-11	1.57651e-11	1.82444e-11	2.18585e-11
14.04	1.96114e-11	2.29605e-11	2.14946e-11	2.14946e-11	2.71222e-11	2.19808e-11	2.56019e-11	2.32259e-11	2.22293e-11	3.31416e-11	2.00003e-11	1.55642e-11	3.06147e-11	2.44016e-11	2.94811e-11	2.23916e-11	1.92337e-11	2.0571e-11	1.62261e-11	2.68661e-11	2.2738e-11	1.92112e-11	1.9945e-11	2.35147e-11	2.17562e-11	1.7876e-11	1.57634e-11	1.82383e-11	2.18606e-11
14.06	1.96202e-11	2.29635e-11	2.14842e-11	2.14842e-11	2.7123e-11	2.19789e-11	2.56027e-11	2.32332e-11	2.22359e-11	3.31488e-11	2.00023e-11	1.55636e-11	3.06125e-11	2.44041e-11	2.94694e-11	2.23946e-11	1.92291e-11	2.05702e-11	1.62262e-11	2.68845e-11	2.27478e-11	1.92076e-11	1.99439e-11	2.35182e-11	2.17585e-11	1.78755e-11	1.57668e-11	1.82402e-11	2.1864e-11
14.08	1.96182e-11	2.29689e-11	2.14874e-11	2.14874e-11	2.71229e-11	2.19767e-11	2.55942e-11	2.32274e-11	2.22318e-11	3.3146e-11	2.0004e-11	1.55637e-11	3.06127e-11	2.44035e-11	2.94747e-11	2.2391e-11	1.9233e-11	2.05706e-11	1.62408e-11	2.68986e-11	2.27433e-11	1.92069e-11	1.99452e-11	2.35185e-11	2.17537e-11	1.7893e-11	1.57669e-11	1.82391e-11	2.18611e-11
14.1	1.96119e-11	2.2959e-11	2.14897e-11	2.14897e-11	2.71223e-11	2.19778e-11	2.55971e-11	2.32272e-11	2.22304e-11	3.31508e-11	2.00045e-11	1.5562e-11	3.06112e-11	2.44041e-11	2.94779e-11	2.23955e-11	1.92323e-11	2.05789e-11	1.62319e-11	2.68638e-11	2.27486e-11	1.92106e-11	1.99463e-11	2.35138e-11	2.17553e-11	1.78887e-11	1.57675e-11	1.82411e-11	2.18647e-11
14.12	1.96168e-11	2.29627e-11	2.14876e-11	2.14876e-11	2.71195e-11	2.19768e-11	2.55964e-11	2.32321e-11	2.22271e-11	3.31421e-11	2.001e-11	1.55594e-11	3.06121e-11	2.44037e-11	2.94695e-11	2.2395e-11	1.92293e-11	2.05775e-11	1.62362e-11	2.6897e-11	2.27459e-11	1.92124e-11	1.9946e-11	2.35152e-11	2.17589e-11	1.78917e-11	1.57737e-11	1.82425e-11	2.18669e-11
14.14	1.96149e-11	2.29629e-11	2.14906e-11	2.14906e-11	2.71183e-11	2.19826e-11	2.55957e-11	2.32286e-11	2.22286e-11	3.31418e-11	2.00102e-11	1.55631e-11	3.06167e-11	2.4399e-11	2.94712e-11	2.23954e-11	1.92356e-11	2.0573e-11	1.62279e-11	2.68696e-11	2.27431e-11	1.92045e-11	1.99487e-11	2.35199e-11	2.17464e-11	1.78759e-11	1.57591e-11	1.82395e-11	2.18644e-11
14.16	1.96135e-11	2.29587e-11	2.14928e-11	2.14928e-11	2.71191e-11	2.19708e-11	2.55964e-11	2.32263e-11	2.22249e-11	3.31468e-11	2.00042e-11	1.55568e-11	3.06137e-11	2.44038e-11	2.94722e-11	2.23933e-11	1.9222e-11	2.05768e-11	1.62367e-11	2.69064e-11	2.27392e-11	1.92141e-11	1.99449e-11	2.35177e-11	2.175e-11	1.78911e-11	1.57665e-11	1.82384e-11	2.18663e-11
14.18	1.96121e-11	2.29581e-11	2.14914e-11	2.14914e-11	2.71201e-11	2.19809e-11	2.55943e-11	2.32284e-11	2.2231e-11	3.31483e-11	2.00052e-11	1.55598e-11	3.06187e-11	2.44031e-11	2.94745e-11	2.23945e-11	1.92242e-11	2.05801e-11	1.62303e-11	2.68739e-11	2.27412e-11	1.92092e-11	1.99428e-11	2.35176e-11	2.1755e-11	1.78955e-11	1.57695e-11	1.82414e-11	2.18597e-11
14.2	1.96153e-11	2.29639e-11	2.14888e-11	2.14888e-11	2.71198e-11	2.19788e-11	2.55938e-11	2.32198e-11	2.22373e-11	3.31552e-11	2.00015e-11	1.55607e-11	3.06121e-11	2.44019e-11	2.94739e-11	2.23927e-11	1.92321e-11	2.05719e-11	1.62293e-11	2.68894e-11	2.27443e-11	1.92098e-11	1.99496e-11	2.35183e-11	2.17561e-11	1.78866e-11	1.57596e-11	1.82418e-11	2.18617e-11
14.22	1.96109e-11	2.29621e-11	2.14826e-11	2.14826e-11	2.71222e-11	2.19806e-11	2.55929e-11	2.32239e-11	2.22264e-11	3.31432e-11	2.00001e-11	1.55555e-11	3.06135e-11	2.44005e-11	2.94751e-11	2.23978e-11	1.92298e-11	2.05791e-11	1.62315e-11	2.68909e-11	2.27379e-11	1.92139e-11	1.99439e-11	2.35125e-11	2.17525e-11	1.78806e-11	1.5768e-11	1.82395e-11	2.18652e-11
14.24	1.96123e-11	2.29663e-11	2.14891e-11	2.14891e-11	2.71217e-11	2.1971e-11	2.55954e-11	2.3223e-11	2.22291e-11	3.31547e-11	2.00055e-11	1.55556e-11	3.06169e-11	2.44019e-11	2.94746e-11	2.23955e-11	1.92299e-11	2.05791e-11	1.62189e-11	2.68602e-11	2.27418e-11	1.92136e-11	1.9945e-11	2.35122e-11	2.17539e-11	1.78804e-11	1.57749e-11	1.82444e-11	2.18701e-11
14.26	1.96101e-11	2.29649e-11	2.14949e-11	2.14949e-11	2.71161e-11	2.19808e-11	2.56004e-11	2.3222e-11	2.22232e-11	3.31456e-11	2.00023e-11	1.55504e-11	3.0616e-11	2.44039e-11	2.94756e-11	2.23951e-11	1.92324e-11	2.05761e-11	1.62205e-11	2.68709e-11	2.27488e-11	1.92096e-11	1.99504e-11	2.35122e-11	2.17574e-11	1.78737e-11	1.5768e-11	1.82386e-11	2.18651e-11
14.28	1.96102e-11	2.29635e-11	2.14892e-11	2.14892e-11	2.71237e-11	2.1975e-11	2.55917e-11	2.32247e-11	2.22307e-11	3.31517e-11	2.00003e-11	1.55645e-11	3.06136e-11	2.44012e-11	2.94759e-11	2.23942e-11	1.92317e-11	2.05736e-11	1.62251e-11	2.68697e-11	2.27452e-11	1.92037e-11	1.99418e-11	2.35148e-11	2.17559e-11	1.78835e-11	1.5773e-11	1.82429e-11	2.18589e-11
14.3	1.96076e-11	2.29617e-11	2.14898e-11	2.14898e-11	2.71207e-11	2.19771e-11	2.55986e-11	2.32198e-11	2.22282e-11	3.31457e-11	2.00061e-11	1.55557e-11	3.06176e-11	2.44075e-11	2.9477e-11	2.23954e-11	1.92304e-11	2.05727e-11	1.62275e-11	2.68808e-11	2.27379e-11	1.92087e-11	1.99384e-11	2.35161e-11	2.17565e-11	1.7885e-11	1.57766e-11	1.82393e-11	2.18661e-11
14.32	1.96095e-11	2.29606e-11	2.14908e-11	2.14908e-11	2.71192e-11	2.1975e-11	2.55997e-11	2.32273e-11	2.22274e-11	3.31473e-11	1.99983e-11	1.55556e-11	3.06206e-11	2.44014e-11	2.94746e-11	2.23907e-11	1.92249e-11	2.05713e-11	1.62256e-11	2.68081e-11	2.27443e-11	1.92119e-11	1.99441e-11	2.35166e-11	2.17497e-11	1.78892e-11	1.57567e-11	1.82412e-11	2.18689e-11
14.34	1.96152e-11	2.29578e-11	2.14866e-11	2.14866e-11	2.71233e-11	2.19819e-11	2.55923e-11	2.32263e-11	2.2227e-11	3.3145e-11	2.00008e-11	1.55596e-11	3.06145e-11	2.44011e-11	2.9473e-11	2.23935e-11	1.92363e-11	2.05788e-11	1.62221e-11	2.68694e-11	2.27513e-11	1.92103e-11	1.99453e-11	2.35136e-11	2.17606e-11	1.78842e-11	1.57722e-11	1.82382e-11	2.1859e-11
14.36	1.96139e-11	2.29596e-11	2.14886e-11	2.14886e-11	2.7123e-11	2.19738e-11	2.5601e-11	2.32231e-11	2.22309e-11	3.31489e-11	2.0004e-11	1.55638e-11	3.06152e-11	2.4406e-11	2.94746e-11	2.23897e-11	1.92302e-11	2.0581e-11	1.62218e-11	2.68893e-11	2.27381e-11	1.9208e-11	1.9945e-11	2.351e-11	2.17552e-11	1.78888e-11	1.57733e-11	1.82375e-11	2.1864e-11
14.38	1.96116e-11	2.29647e-11	2.14838e-11	2.14838e-11	2.71214e-11	2.19801e-11	2.55987e-11	2.32328e-11	2.22282e-11	3.31491e-11	2.00003e-11	1.55615e-11	3.06163e-11	2.44058e-11	2.94822e-11	2.23941e-11	1.92329e-11	2.05799e-11	1.62194e-11	2.68407e-11	2.27522e-11	1.9207e-11	1.99436e-11	2.35138e-11	2.17535e-11	1.78882e-11	1.57792e-11	1.82432e-11	2.18654e-11
14.4	1.96099e-11	2.29632e-11	2.14882e-11	2.14882e-11	2.71195e-11	2.19857e-11	2.56005e-11	2.32294e-11	2.22274e-11	3.31461e-11	2.00065e-11	1.55579e-11	3.06166e-11	2.4401e-11	2.94708e-11	2.23931e-11	1.92341e-11	2.05761e-11	1.62231e-11	2.68627e-11	2.27486e-11	1.92108e-11	1.9947e-11	2.35182e-11	2.17541e-11	1.78762e-11	1.5772e-11	1.82351e-11	2.18634e-11
14.42	1.96017e-11	2.29609e-11	2.14908e-11	2.14908e-11	2.71174e-11	2.19768e-11	2.55889e-11	2.32279e-11	2.22292e-11	3.31512e-11	2.00036e-11	1.55595e-11	3.06213e-11	2.44005e-11	2.94795e-11	2.23914e-11	1.92308e-11	2.05776e-11	1.62236e-11	2.68821e-11	2.27441e-11	1.92085e-11	1.99445e-11	2.35163e-11	2.17568e-11	1.78807e-11	1.577e-11	1.82421e-11	2.18628e-11
14.44	1.96059e-11	2.29569e-11	2.1487e-11	2.1487e-11	2.71209e-11	2.19759e-11	2.55925e-11	2.32255e-11	2.22236e-11	3.31431e-11	2.00051e-11	1.55574e-11	3.06132e-11	2.43982e-11	2.94735e-11	2.23909e-11	1.92293e-11	2.05755e-11	1.62148e-11	2.68741e-11	2.27481e-11	1.9211e-11	1.99447e-11	2.35061e-11	2.17503e-11	1.78613e-11	1.57684e-11	1.82424e-11	2.18676e-11
14.46	1.96077e-11	2.29665e-11	2.14883e-11	2.14883e-11	2.71175e-11	2.19783e-11	2.55986e-11	2.32215e-11	2.2228e-11	3.31464e-11	2.00029e-11	1.55615e-11	3.06158e-11	2.44036e-11	2.94765e-11	2.23945e-11	1.92423e-11	2.05768e-11	1.62228e-11	2.68686e-11	2.2743e-11	1.92065e-11	1.99432e-11	2.35109e-11	2.17532e-11	1.78697e-11	1.57633e-11	1.82448e-11	2.18668e-11
14.48	1.96113e-11	2.2962e-11	2.14934e-11	2.14934e-11	2.71239e-11	2.19762e-11	2.55993e-11	2.32159e-11	2.22239e-11	3.31473e-11	2e-11	1.55577e-11	3.06182e-11	2.43988e-11	2.94733e-11	2.23903e-11	1.92326e-11	2.05705e-11	1.62288e-11	2.69097e-11	2.27467e-11	1.92113e-11	1.99472e-11	2.35129e-11	2.17523e-11	1.78673e-11	1.57696e-11	1.82444e-11	2.18608e-11
14.5	1.9604e-11	2.29612e-11	2.14926e-11	2.14926e-11	2.712e-11	2.19846e-11	2.55983e-11	2.32224e-11	2.22254e-11	3.31443e-11	2.00061e-11	1.55655e-11	3.06191e-11	2.44062e-11	2.94747e-11	2.23899e-11	1.92325e-11	2.057e-11	1.6228e-11	2.68869e-11	2.27445e-11	1.92147e-11	1.99455e-11	2.35128e-11	2.17533e-11	1.78712e-11	1.57637e-11	1.82379e-11	2.18659e-11
14.52	1.96028e-11	2.29668e-11	2.14933e-11	2.14933e-11	2.71223e-11	2.19839e-11	2.55928e-11	2.32206e-11	2.22252e-11	3.31407e-11	1.99969e-11	1.55614e-11	3.06219e-11	2.44005e-11	2.94819e-11	2.23915e-11	1.92284e-11	2.0577e-11	1.6228e-11	2.68875e-11	2.27435e-11	1.92122e-11	1.9944e-11	2.35142e-11	2.17541e-11	1.7875e-11	1.57722e-11	1.82409e-11	2.18601e-11
14.54	1.9603e-11	2.29603e-11	2.1494e-11	2.1494e-11	2.71238e-11	2.19814e-11	2.55978e-11	2.32248e-11	2.22264e-11	3.31487e-11	2.00047e-11	1.55555e-11	3.06225e-11	2.43998e-11	2.94779e-11	2.23895e-11	1.92394e-11	2.05725e-11	1.62232e-11	2.68759e-11	2.27388e-11	1.92081e-11	1.99482e-11	2.35136e-11	2.17442e-11	1.78794e-11	1.5771e-11	1.82442e-11	2.18599e-11
14.56	1.96055e-11	2.29587e-11	2.14874e-11	2.14874e-11	2.71173e-11	2.19818e-11	2.55878e-11	2.32179e-11	2.22287e-11	3.31424e-11	2.00032e-11	1.55603e-11	3.06204e-11	2.44036e-11	2.94796e-11	2.23879e-11	1.92295e-11	2.05821e-11	1.62189e-11	2.68857e-11	2.27469e-11	1.92128e-11	1.9949e-11	2.35135e-11	2.17546e-11	1.78828e-11	1.57507e-11	1.82474e-11	2.18684e-11
14.58	1.9595e-11	2.2963e-11	2.14909e-11	2.14909e-11	2.71213e-11	2.19777e-11	2.55929e-11	2.32278e-11	2.22321e-11	3.3147e-11	2.00042e-11	1.55632e-11	3.06182e-11	2.44004e-11	2.94789e-11	2.23921e-11	1.92376e-11	2.05769e-11	1.62181e-11	2.68704e-11	2.27461e-11	1.92112e-11	1.99465e-11	2.35159e-11	2.17571e-11	1.78799e-11	1.57648e-11	1.8242e-11	2.18589e-11
14.6	1.9609e-11	2.29628e-11	2.1488e-11	2.1488e-11	2.7118e-11	2.19817e-11	2.55874e-11	2.32149e-11	2.22218e-11	3.31506e-11	2.00018e-11	1.55616e-11	3.06178e-11	2.43925e-11	2.94753e-11	2.23929e-11	1.92383e-11	2.05831e-11	1.62326e-11	2.68512e-11	2.27496e-11	1.92146e-11	1.99475e-11	2.35131e-11	2.17544e-11	1.78807e-11	1.57717e-11	1.8243e-11	2.18662e-11
14.62	1.96e-11	2.29604e-11	2.1491e-11	2.1491e-11	2.71259e-11	2.19765e-11	2.55899e-11	2.32256e-11	2.22308e-11	3.31424e-11	2.00048e-11	1.55637e-11	3.06211e-11	2.4397e-11	2.94801e-11	2.23963e-11	1.92295e-11	2.05809e-11	1.62234e-11	2.68665e-11	2.27374e-11	1.92084e-11	1.99502e-11	2.35135e-11	2.17569e-11	1.7868e-11	1.57699e-11	1.82442e-11	2.18656e-11
14.64	1.96037e-11	2.29584e-11	2.14922e-11	2.14922e-11	2.71187e-11	2.19784e-11	2.55915e-11	2.32223e-11	2.22321e-11	3.31428e-11	2.00039e-11	1.55623e-11	3.06205e-11	2.44028e-11	2.94724e-11	2.23909e-11	1.92346e-11	2.05768e-11	1.62278e-11	2.68575e-11	2.27404e-11	1.92155e-11	1.99489e-11	2.35122e-11	2.1751e-11	1.78669e-11	1.57657e-11	1.82382e-11	2.18658e-11
14.66	1.96003e-11	2.29654e-11	2.14898e-11	2.14898e-11	2.7118e-11	2.19801e-11	2.55918e-11	2.32233e-11	2.22307e-11	3.3148e-11	1.99978e-11	1.55623e-11	3.06188e-11	2.4403e-11	2.9481e-11	2.23946e-11	1.92283e-11	2.0566e-11	1.62286e-11	2.68632e-11	2.27454e-11	1.92139e-11	1.99414e-11	2.35138e-11	2.17608e-11	1.78719e-11	1.57656e-11	1.82475e-11	2.18695e-11
14.68	1.95995e-11	2.29608e-11	2.14949e-11	2.14949e-11	2.71187e-11	2.19802e-11	2.55949e-11	2.32257e-11	2.22298e-11	3.31448e-11	2.00032e-11	1.55627e-11	3.06152e-11	2.43991e-11	2.94736e-11	2.23911e-11	1.92289e-11	2.05682e-11	1.6213e-11	2.6864e-11	2.27372e-11	1.9213e-11	1.99467e-11	2.35151e-11	2.175e-11	1.78745e-11	1.57638e-11	1.82403e-11	2.18631e-11
14.7	1.96045e-11	2.29563e-11	2.14979e-11	2.14979e-11	2.71215e-11	2.19773e-11	2.55921e-11	2.32177e-11	2.22277e-11	3.31464e-11	2.00026e-11	1.55611e-11	3.06213e-11	2.43999e-11	2.94757e-11	2.23943e-11	1.92319e-11	2.05698e-11	1.62174e-11	2.68941e-11	2.27439e-11	1.9209e-11	1.99467e-11	2.35099e-11	2.17533e-11	1.78669e-11	1.57752e-11	1.82438e-11	2.18609e-11
14.72	1.96012e-11	2.29619e-11	2.14936e-11	2.14936e-11	2.71259e-11	2.19783e-11	2.55968e-11	2.32212e-11	2.22281e-11	3.31463e-11	2.00024e-11	1.55584e-11	3.06145e-11	2.44011e-11	2.94752e-11	2.23908e-11	1.923e-11	2.05659e-11	1.62289e-11	2.6878e-11	2.2744e-11	1.92097e-11	1.99448e-11	2.35035e-11	2.17533e-11	1.78651e-11	1.57732e-11	1.82433e-11	2.1853e-11
14.74	1.95979e-11	2.29595e-11	2.1492e-11	2.1492e-11	2.71201e-11	2.19824e-11	2.55934e-11	2.32165e-11	2.2222e-11	3.31455e-11	2.00047e-11	1.55679e-11	3.06197e-11	2.43979e-11	2.9473e-11	2.2397e-11	1.92378e-11	2.05664e-11	1.62082e-11	2.68781e-11	2.27431e-11	1.92115e-11	1.9948e-11	2.35105e-11	2.1752e-11	1.78702e-11	1.57739e-11	1.82402e-11	2.18632e-11
14.76	1.95936e-11	2.29625e-11	2.14956e-11	2.14956e-11	2.71225e-11	2.19756e-11	2.55946e-11	2.32222e-11	2.22269e-11	3.31501e-11	2.00069e-11	1.55612e-11	3.06179e-11	2.44014e-11	2.94748e-11	2.23919e-11	1.92343e-11	2.05565e-11	1.62252e-11	2.68909e-11	2.27398e-11	1.92184e-11	1.99475e-11	2.35081e-11	2.17507e-11	1.78657e-11	1.5764e-11	1.82353e-11	2.18627e-11
14.78	1.95973e-11	2.29571e-11	2.14917e-11	2.14917e-11	2.7116e-11	2.19832e-11	2.55984e-11	2.32189e-11	2.22284e-11	3.31469e-11	2.00046e-11	1.55588e-11	3.06165e-11	2.43987e-11	2.94748e-11	2.23888e-11	1.9234e-11	2.05603e-11	1.6232e-11	2.68689e-11	2.27494e-11	1.92105e-11	1.99443e-11	2.35177e-11	2.1758e-11	1.78737e-11	1.57641e-11	1.82406e-11	2.1856e-11
14.8	1.95988e-11	2.29612e-11	2.14902e-11	2.14902e-11	2.7121e-11	2.19801e-11	2.55902e-11	2.32192e-11	2.22304e-11	3.31455e-11	2.0008e-11	1.55569e-11	3.06187e-11	2.44013e-11	2.94749e-11	2.23966e-11	1.9238e-11	2.05637e-11	1.62278e-11	2.68572e-11	2.27594e-11	1.92124e-11	1.99488e-11	2.35112e-11	2.17555e-11	1.78612e-11	1.576e-11	1.82351e-11	2.18602e-11
14.82	1.95987e-11	2.29632e-11	2.1492e-11	2.1492e-11	2.71227e-11	2.19828e-11	2.55935e-11	2.32265e-11	2.2229e-11	3.31463e-11	2.00053e-11	1.55589e-11	3.06197e-11	2.43981e-11	2.94747e-11	2.23952e-11	1.92327e-11	2.05636e-11	1.62286e-11	2.6882e-11	2.27445e-11	1.92101e-11	1.99489e-11	2.35071e-11	2.17564e-11	1.78562e-11	1.57675e-11	1.82385e-11	2.18639e-11
14.84	1.95989e-11	2.29599e-11	2.14969e-11	2.14969e-11	2.71235e-11	2.19816e-11	2.55907e-11	2.32209e-11	2.22308e-11	3.3143e-11	2.00029e-11	1.55609e-11	3.0623e-11	2.44015e-11	2.94693e-11	2.23882e-11	1.92304e-11	2.05691e-11	1.62166e-11	2.68905e-11	2.27408e-11	1.92071e-11	1.99468e-11	2.35096e-11	2.17469e-11	1.78644e-11	1.5765e-11	1.82407e-11	2.18545e-11
14.86	1.96006e-11	2.29601e-11	2.14927e-11	2.14927e-11	2.71188e-11	2.19735e-11	2.55965e-11	2.32193e-11	2.22332e-11	3.31481e-11	2.00032e-11	1.55588e-11	3.0615e-11	2.43974e-11	2.94771e-11	2.23956e-11	1.92366e-11	2.05682e-11	1.62234e-11	2.68795e-11	2.27371e-11	1.9217e-11	1.99446e-11	2.35116e-11	2.17545e-11	1.7862e-11	1.57592e-11	1.82412e-11	2.1867e-11
14.88	1.9599e-11	2.29554e-11	2.14934e-11	2.14934e-11	2.71261e-11	2.19748e-11	2.55978e-11	2.32156e-11	2.2226e-11	3.31394e-11	2.0001e-11	1.55622e-11	3.06226e-11	2.43996e-11	2.94783e-11	2.23975e-11	1.92378e-11	2.05714e-11	1.62302e-11	2.68631e-11	2.27422e-11	1.9211e-11	1.99509e-11	2.35054e-11	2.17572e-11	1.78763e-11	1.57652e-11	1.82396e-11	2.18601e-11
14.9	1.9598e-11	2.29718e-11	2.14979e-11	2.14979e-11	2.71201e-11	2.19837e-11	2.55924e-11	2.3222e-11	2.22274e-11	3.31499e-11	2.00027e-11	1.55629e-11	3.06166e-11	2.44025e-11	2.94771e-11	2.23953e-11	1.92363e-11	2.05723e-11	1.62244e-11	2.6862e-11	2.27445e-11	1.921e-11	1.99526e-11	2.35062e-11	2.17571e-11	1.78734e-11	1.57591e-11	1.82403e-11	2.18571e-11
14.92	1.96053e-11	2.296e-11	2.14898e-11	2.14898e-11	2.71192e-11	2.19824e-11	2.5596e-11	2.32173e-11	2.22285e-11	3.31399e-11	1.99975e-11	1.55573e-11	3.0618e-11	2.44029e-11	2.94767e-11	2.23951e-11	1.92363e-11	2.05712e-11	1.62419e-11	2.68546e-11	2.27448e-11	1.92116e-11	1.99479e-11	2.35087e-11	2.17493e-11	1.78712e-11	1.57679e-11	1.82462e-11	2.18651e-11
14.94	1.95998e-11	2.2965e-11	2.14947e-11	2.14947e-11	2.71212e-11	2.19839e-11	2.55972e-11	2.32159e-11	2.22309e-11	3.31378e-11	1.99987e-11	1.55625e-11	3.06199e-11	2.44034e-11	2.94707e-11	2.23943e-11	1.92277e-11	2.05706e-11	1.62321e-11	2.68652e-11	2.27458e-11	1.92082e-11	1.99457e-11	2.35059e-11	2.17572e-11	1.78684e-11	1.57651e-11	1.82446e-11	2.18658e-11
14.96	1.95959e-11	2.29663e-11	2.14891e-11	2.14891e-11	2.71251e-11	2.19788e-11	2.55992e-11	2.32229e-11	2.22287e-11	3.31456e-11	1.99959e-11	1.55614e-11	3.06207e-11	2.4398e-11	2.9475e-11	2.23908e-11	1.92318e-11	2.05771e-11	1.62346e-11	2.68697e-11	2.27453e-11	1.92116e-11	1.99464e-11	2.3507e-11	2.17623e-11	1.78592e-11	1.57693e-11	1.8244e-11	2.1866e-11
14.98	1.95945e-11	2.29533e-11	2.14981e-11	2.14981e-11	2.71207e-11	2.19823e-11	2.55899e-11	2.32152e-11	2.22277e-11	3.31479e-11	2.00011e-11	1.55584e-11	3.06222e-11	2.44e-11	2.94775e-11	2.23952e-11	1.92351e-11	2.05734e-11	1.62228e-11	2.68713e-11	2.27482e-11	1.92097e-11	1.9944e-11	2.35035e-11	2.17474e-11	1.78669e-11	1.57691e-11	1.82404e-11	2.18657e-11
15	1.9598e-11	2.29629e-11	2.14896e-11	2.14896e-11	2.71172e-11	2.19885e-11	2.55915e-11	2.3216e-11	2.22234e-11	3.31456e-11	1.99987e-11	1.55625e-11	3.06184e-11	2.44022e-11	2.94795e-11	2.23928e-11	1.92378e-11	2.0572e-11	1.62207e-11	2.68821e-11	2.27399e-11	1.92135e-11	1.99491e-11	2.35047e-11	2.1754e-11	1.78665e-11	1.57614e-11	1.82455e-11	2.18583e-11
15.02	1.95986e-11	2.296e-11	2.14926e-11	2.14926e-11	2.71227e-11	2.19751e-11	2.56e-11	2.32232e-11	2.22244e-11	3.31429e-11	1.99989e-11	1.55609e-11	3.06225e-11	2.43986e-11	2.94827e-11	2.2391e-11	1.9231e-11	2.05758e-11	1.6222e-11	2.68363e-11	2.27465e-11	1.92061e-11	1.99472e-11	2.3504e-11	2.17504e-11	1.78735e-11	1.57707e-11	1.82451e-11	2.18615e-11
15.04	1.9597e-11	2.29677e-11	2.1494e-11	2.1494e-11	2.71221e-11	2.19914e-11	2.56013e-11	2.32187e-11	2.22269e-11	3.31469e-11	2.00035e-11	1.55564e-11	3.06222e-11	2.43996e-11	2.94762e-11	2.23937e-11	1.92346e-11	2.05772e-11	1.62196e-11	2.68438e-11	2.27486e-11	1.92141e-11	1.99466e-11	2.35046e-11	2.17533e-11	1.78688e-11	1.57633e-11	1.82402e-11	2.18652e-11
15.06	1.9599e-11	2.29652e-11	2.14951e-11	2.14951e-11	2.71286e-11	2.19802e-11	2.55905e-11	2.32128e-11	2.22268e-11	3.31493e-11	2.00049e-11	1.55608e-11	3.0622e-11	2.44002e-11	2.94755e-11	2.23886e-11	1.92328e-11	2.05771e-11	1.62234e-11	2.68469e-11	2.275e-11	1.92096e-11	1.9949e-11	2.34989e-11	2.17568e-11	1.78605e-11	1.57652e-11	1.82441e-11	2.18641e-11
15.08	1.95939e-11	2.29651e-11	2.14937e-11	2.14937e-11	2.71215e-11	2.19763e-11	2.55909e-11	2.32204e-11	2.22333e-11	3.31478e-11	2.00047e-11	1.55585e-11	3.0627e-11	2.44007e-11	2.9475e-11	2.239e-11	1.92355e-11	2.0574e-11	1.62176e-11	2.68489e-11	2.2744e-11	1.92139e-11	1.99448e-11	2.35087e-11	2.17544e-11	1.7857e-11	1.577e-11	1.82436e-11	2.18625e-11
15.1	1.95898e-11	2.29673e-11	2.14962e-11	2.14962e-11	2.71215e-11	2.19804e-11	2.56012e-11	2.32157e-11	2.22249e-11	3.31473e-11	2.00014e-11	1.55613e-11	3.06207e-11	2.4399e-11	2.94747e-11	2.23944e-11	1.92369e-11	2.05834e-11	1.62252e-11	2.6846e-11	2.27412e-11	1.92139e-11	1.9953e-11	2.35046e-11	2.17541e-11	1.78566e-11	1.57734e-11	1.82409e-11	2.1865e-11
15.12	1.95918e-11	2.29665e-11	2.14875e-11	2.14875e-11	2.71218e-11	2.1983e-11	2.55978e-11	2.32162e-11	2.22262e-11	3.31461e-11	1.99984e-11	1.55592e-11	3.06221e-11	2.44054e-11	2.94806e-11	2.23962e-11	1.92346e-11	2.05741e-11	1.62272e-11	2.68327e-11	2.27405e-11	1.9215e-11	1.99457e-11	2.34991e-11	2.17592e-11	1.78507e-11	1.57685e-11	1.82338e-11	2.18604e-11
15.14	1.95909e-11	2.29695e-11	2.14894e-11	2.14894e-11	2.71225e-11	2.19776e-11	2.55999e-11	2.32166e-11	2.22342e-11	3.31487e-11	2.00017e-11	1.55581e-11	3.06199e-11	2.44054e-11	2.94804e-11	2.23932e-11	1.92341e-11	2.05782e-11	1.62199e-11	2.68385e-11	2.27438e-11	1.92121e-11	1.99536e-11	2.35055e-11	2.17544e-11	1.78727e-11	1.57674e-11	1.82421e-11	2.18636e-11
15.16	1.95875e-11	2.29614e-11	2.1493e-11	2.1493e-11	2.71207e-11	2.1982e-11	2.55963e-11	2.32202e-11	2.22302e-11	3.31422e-11	2.00034e-11	1.55591e-11	3.06253e-11	2.4396e-11	2.94729e-11	2.2392e-11	1.92313e-11	2.05723e-11	1.62286e-11	2.68454e-11	2.27452e-11	1.92106e-11	1.99505e-11	2.35019e-11	2.17566e-11	1.78511e-11	1.57633e-11	1.82353e-11	2.18673e-11
15.18	1.95897e-11	2.29675e-11	2.14917e-11	2.14917e-11	2.71269e-11	2.1976e-11	2.55971e-11	2.3219e-11	2.223e-11	3.31483e-11	2.0007e-11	1.55575e-11	3.06245e-11	2.43989e-11	2.94796e-11	2.23975e-11	1.92328e-11	2.05691e-11	1.62168e-11	2.68658e-11	2.27452e-11	1.9211e-11	1.99482e-11	2.35063e-11	2.17506e-11	1.78599e-11	1.57724e-11	1.82411e-11	2.18655e-11
15.2	1.95849e-11	2.29618e-11	2.14907e-11	2.14907e-11	2.71241e-11	2.19813e-11	2.55917e-11	2.32139e-11	2.22326e-11	3.31482e-11	2.00058e-11	1.55551e-11	3.06192e-11	2.44026e-11	2.94777e-11	2.23957e-11	1.9231e-11	2.05826e-11	1.62165e-11	2.68446e-11	2.27515e-11	1.92083e-11	1.99485e-11	2.35047e-11	2.1758e-11	1.78706e-11	1.57643e-11	1.8246e-11	2.18629e-11
15.22	1.9585e-11	2.29692e-11	2.14947e-11	2.14947e-11	2.71222e-11	2.19736e-11	2.55946e-11	2.322e-11	2.22302e-11	3.31516e-11	2.00095e-11	1.55615e-11	3.06221e-11	2.43989e-11	2.94777e-11	2.23929e-11	1.92324e-11	2.05777e-11	1.62185e-11	2.68451e-11	2.27478e-11	1.92106e-11	1.99392e-11	2.35027e-11	2.17562e-11	1.78693e-11	1.57609e-11	1.82423e-11	2.18602e-11
15.24	1.95906e-11	2.29588e-11	2.14973e-11	2.14973e-11	2.71265e-11	2.19793e-11	2.55949e-11	2.32156e-11	2.22322e-11	3.31562e-11	2.00022e-11	1.5557e-11	3.06197e-11	2.44028e-11	2.94799e-11	2.23958e-11	1.92297e-11	2.05833e-11	1.62263e-11	2.68597e-11	2.27453e-11	1.92171e-11	1.99479e-11	2.34995e-11	2.17566e-11	1.78599e-11	1.57612e-11	1.82403e-11	2.18625e-11
15.26	1.95867e-11	2.29657e-11	2.14927e-11	2.14927e-11	2.71247e-11	2.19764e-11	2.55936e-11	2.32186e-11	2.22309e-11	3.31441e-11	2.00039e-11	1.55582e-11	3.06216e-11	2.44007e-11	2.94846e-11	2.23954e-11	1.92349e-11	2.05763e-11	1.62276e-11	2.68644e-11	2.27464e-11	1.92132e-11	1.99472e-11	2.35055e-11	2.17577e-11	1.78552e-11	1.57757e-11	1.8241e-11	2.18674e-11
15.28	1.95871e-11	2.29665e-11	2.14908e-11	2.14908e-11	2.71179e-11	2.19787e-11	2.55933e-11	2.32185e-11	2.22247e-11	3.31513e-11	2.00057e-11	1.55617e-11	3.06229e-11	2.4405e-11	2.94732e-11	2.24015e-11	1.9229e-11	2.05843e-11	1.62252e-11	2.68279e-11	2.27472e-11	1.92143e-11	1.9949e-11	2.35045e-11	2.17507e-11	1.78529e-11	1.57746e-11	1.82381e-11	2.18641e-11
15.3	1.95833e-11	2.29666e-11	2.14891e-11	2.14891e-11	2.7122e-11	2.1973e-11	2.55952e-11	2.32156e-11	2.22273e-11	3.31467e-11	2.00065e-11	1.55553e-11	3.06255e-11	2.44005e-11	2.94834e-11	2.23946e-11	1.92315e-11	2.05797e-11	1.62243e-11	2.68864e-11	2.27434e-11	1.92128e-11	1.99481e-11	2.35036e-11	2.17576e-11	1.78647e-11	1.57754e-11	1.82433e-11	2.1872e-11
15.32	1.95879e-11	2.29609e-11	2.14901e-11	2.14901e-11	2.71215e-11	2.19687e-11	2.55893e-11	2.32088e-11	2.22315e-11	3.31473e-11	2.00011e-11	1.55568e-11	3.06201e-11	2.43947e-11	2.9481e-11	2.23965e-11	1.92347e-11	2.05749e-11	1.62113e-11	2.68776e-11	2.27455e-11	1.92132e-11	1.99438e-11	2.34992e-11	2.17575e-11	1.78614e-11	1.57744e-11	1.8244e-11	2.18576e-11
15.34	1.95886e-11	2.29619e-11	2.14957e-11	2.14957e-11	2.71197e-11	2.19814e-11	2.56026e-11	2.32162e-11	2.22326e-11	3.3151e-11	2.00068e-11	1.55548e-11	3.0626e-11	2.43947e-11	2.94793e-11	2.23909e-11	1.92331e-11	2.05843e-11	1.62165e-11	2.68776e-11	2.27426e-11	1.921e-11	1.99485e-11	2.35055e-11	2.17582e-11	1.78705e-11	1.57726e-11	1.82431e-11	2.18636e-11
15.36	1.95838e-11	2.29656e-11	2.1491e-11	2.1491e-11	2.71274e-11	2.19759e-11	2.55907e-11	2.32171e-11	2.22322e-11	3.31454e-11	2.00035e-11	1.55594e-11	3.06243e-11	2.44055e-11	2.94793e-11	2.2399e-11	1.92327e-11	2.05847e-11	1.622e-11	2.68474e-11	2.27453e-11	1.92122e-11	1.9945e-11	2.35024e-11	2.17555e-11	1.78654e-11	1.57632e-11	1.82459e-11	2.18638e-11
15.38	1.95861e-11	2.2965e-11	2.14969e-11	2.14969e-11	2.71174e-11	2.19763e-11	2.55918e-11	2.32155e-11	2.22366e-11	3.31449e-11	2.00017e-11	1.55558e-11	3.06208e-11	2.44013e-11	2.94802e-11	2.23986e-11	1.92321e-11	2.05801e-11	1.62138e-11	2.68361e-11	2.2744e-11	1.92112e-11	1.99479e-11	2.35007e-11	2.17533e-11	1.78608e-11	1.57625e-11	1.82426e-11	2.18661e-11
15.4	1.95832e-11	2.2962e-11	2.14957e-11	2.14957e-11	2.71192e-11	2.19724e-11	2.55939e-11	2.32118e-11	2.22321e-11	3.31462e-11	2.00021e-11	1.55552e-11	3.06204e-11	2.43988e-11	2.94787e-11	2.23904e-11	1.92332e-11	2.05837e-11	1.6213e-11	2.6864e-11	2.27431e-11	1.92141e-11	1.99508e-11	2.34994e-11	2.17553e-11	1.78497e-11	1.57614e-11	1.82378e-11	2.18617e-11
15.42	1.95853e-11	2.29581e-11	2.14929e-11	2.14929e-11	2.71229e-11	2.19712e-11	2.55914e-11	2.32188e-11	2.22307e-11	3.31471e-11	2e-11	1.5552e-11	3.06219e-11	2.44022e-11	2.94806e-11	2.23959e-11	1.92356e-11	2.05847e-11	1.62191e-11	2.68621e-11	2.27469e-11	1.92068e-11	1.9956e-11	2.34968e-11	2.1752e-11	1.78625e-11	1.57572e-11	1.8248e-11	2.18707e-11
15.44	1.95817e-11	2.29575e-11	2.14892e-11	2.14892e-11	2.71257e-11	2.19688e-11	2.55986e-11	2.32156e-11	2.22362e-11	3.31489e-11	2.00044e-11	1.55538e-11	3.06231e-11	2.4403e-11	2.948e-11	2.23944e-11	1.92367e-11	2.05824e-11	1.62148e-11	2.68489e-11	2.27515e-11	1.92101e-11	1.99524e-11	2.35076e-11	2.17533e-11	1.78693e-11	1.57636e-11	1.82415e-11	2.18696e-11
15.46	1.95851e-11	2.29616e-11	2.14973e-11	2.14973e-11	2.71227e-11	2.19691e-11	2.55944e-11	2.32182e-11	2.22311e-11	3.3143e-11	2.00005e-11	1.55617e-11	3.06188e-11	2.44e-11	2.94784e-11	2.23964e-11	1.92316e-11	2.05809e-11	1.62198e-11	2.6841e-11	2.27505e-11	1.92131e-11	1.99478e-11	2.34981e-11	2.17546e-11	1.78687e-11	1.57693e-11	1.8238e-11	2.18658e-11
15.48	1.95832e-11	2.29552e-11	2.1492e-11	2.1492e-11	2.71192e-11	2.19752e-11	2.5595e-11	2.32178e-11	2.22257e-11	3.31505e-11	2.00086e-11	1.55599e-11	3.06218e-11	2.44013e-11	2.94803e-11	2.23966e-11	1.92346e-11	2.05819e-11	1.62066e-11	2.68216e-11	2.27417e-11	1.92145e-11	1.99502e-11	2.34993e-11	2.17546e-11	1.78594e-11	1.5778e-11	1.82465e-11	2.1864e-11
15.5	1.95822e-11	2.29638e-11	2.14921e-11	2.14921e-11	2.71268e-11	2.19752e-11	2.55966e-11	2.32149e-11	2.22311e-11	3.31494e-11	2.00002e-11	1.55549e-11	3.06185e-11	2.43965e-11	2.94794e-11	2.23875e-11	1.92276e-11	2.05745e-11	1.62219e-11	2.68587e-11	2.27446e-11	1.92089e-11	1.99546e-11	2.34982e-11	2.17534e-11	1.78558e-11	1.57773e-11	1.82419e-11	2.18671e-11
15.52	1.9585e-11	2.29553e-11	2.14922e-11	2.14922e-11	2.71226e-11	2.19753e-11	2.55985e-11	2.32141e-11	2.22326e-11	3.31491e-11	2.00059e-11	1.55575e-11	3.06206e-11	2.44012e-11	2.94781e-11	2.23922e-11	1.9233e-11	2.05726e-11	1.62225e-11	2.68723e-11	2.27448e-11	1.92133e-11	1.9948e-11	2.35043e-11	2.1756e-11	1.78664e-11	1.57711e-11	1.8238e-11	2.18604e-11
15.54	1.95873e-11	2.29562e-11	2.14974e-11	2.14974e-11	2.71225e-11	2.19744e-11	2.55949e-11	2.32216e-11	2.22244e-11	3.31476e-11	2.00039e-11	1.55594e-11	3.06308e-11	2.44003e-11	2.94807e-11	2.23911e-11	1.92315e-11	2.05773e-11	1.62085e-11	2.68787e-11	2.27359e-11	1.92096e-11	1.99507e-11	2.35038e-11	2.175e-11	1.7868e-11	1.57659e-11	1.82504e-11	2.18646e-11
15.56	1.9586e-11	2.29609e-11	2.14921e-11	2.14921e-11	2.71178e-11	2.19734e-11	2.55929e-11	2.32159e-11	2.22326e-11	3.31429e-11	2.00025e-11	1.55536e-11	3.0622e-11	2.44e-11	2.94847e-11	2.23898e-11	1.92339e-11	2.05743e-11	1.62241e-11	2.68574e-11	2.27377e-11	1.92099e-11	1.99484e-11	2.34996e-11	2.17557e-11	1.7863e-11	1.57639e-11	1.82426e-11	2.18668e-11
15.58	1.95787e-11	2.29525e-11	2.14858e-11	2.14858e-11	2.71201e-11	2.19717e-11	2.55938e-11	2.32142e-11	2.2232e-11	3.31539e-11	2.00026e-11	1.55536e-11	3.06189e-11	2.43992e-11	2.9482e-11	2.2386e-11	1.92406e-11	2.05713e-11	1.62241e-11	2.69e-11	2.2737e-11	1.92114e-11	1.99507e-11	2.34934e-11	2.1758e-11	1.78592e-11	1.57683e-11	1.82433e-11	2.18708e-11
15.6	1.95763e-11	2.29595e-11	2.14899e-11	2.14899e-11	2.71225e-11	2.19764e-11	2.55953e-11	2.32107e-11	2.22269e-11	3.31546e-11	2.0003e-11	1.55553e-11	3.06198e-11	2.43985e-11	2.94768e-11	2.23851e-11	1.92311e-11	2.05724e-11	1.62278e-11	2.68733e-11	2.27475e-11	1.92115e-11	1.99532e-11	2.34984e-11	2.17555e-11	1.78698e-11	1.57663e-11	1.82411e-11	2.18665e-11
15.62	1.95846e-11	2.2954e-11	2.14922e-11	2.14922e-11	2.71201e-11	2.19771e-11	2.55921e-11	2.32163e-11	2.22336e-11	3.31467e-11	2.00036e-11	1.55532e-11	3.06246e-11	2.43999e-11	2.948e-11	2.23936e-11	1.92317e-11	2.05699e-11	1.62186e-11	2.68893e-11	2.27498e-11	1.92134e-11	1.99496e-11	2.35006e-11	2.17508e-11	1.78739e-11	1.57701e-11	1.82435e-11	2.18633e-11
15.64	1.9584e-11	2.29591e-11	2.14956e-11	2.14956e-11	2.7124e-11	2.19799e-11	2.55977e-11	2.32084e-11	2.22294e-11	3.31507e-11	1.9999e-11	1.55528e-11	3.06217e-11	2.43995e-11	2.94797e-11	2.23933e-11	1.92328e-11	2.05719e-11	1.62222e-11	2.68544e-11	2.27409e-11	1.92041e-11	1.99506e-11	2.35027e-11	2.17643e-11	1.78623e-11	1.57669e-11	1.82409e-11	2.18586e-11
15.66	1.95807e-11	2.29562e-11	2.14914e-11	2.14914e-11	2.71233e-11	2.19762e-11	2.56042e-11	2.32165e-11	2.22286e-11	3.3157e-11	1.99997e-11	1.55526e-11	3.06232e-11	2.44012e-11	2.94839e-11	2.23924e-11	1.92302e-11	2.0572e-11	1.62175e-11	2.68399e-11	2.27513e-11	1.92181e-11	1.99519e-11	2.35e-11	2.17565e-11	1.78723e-11	1.57684e-11	1.82403e-11	2.18588e-11
15.68	1.95823e-11	2.29562e-11	2.14883e-11	2.14883e-11	2.71208e-11	2.19738e-11	2.55978e-11	2.32057e-11	2.22271e-11	3.31532e-11	2.00009e-11	1.55502e-11	3.06246e-11	2.44007e-11	2.94726e-11	2.23972e-11	1.92307e-11	2.05689e-11	1.62218e-11	2.68682e-11	2.27481e-11	1.92142e-11	1.99558e-11	2.35004e-11	2.17575e-11	1.78641e-11	1.57758e-11	1.82437e-11	2.18609e-11
15.7	1.95856e-11	2.29561e-11	2.14911e-11	2.14911e-11	2.71188e-11	2.19748e-11	2.55924e-11	2.3216e-11	2.22297e-11	3.31489e-11	2.00027e-11	1.55559e-11	3.06209e-11	2.44013e-11	2.948e-11	2.23979e-11	1.92335e-11	2.05699e-11	1.62246e-11	2.68218e-11	2.27417e-11	1.92153e-11	1.99495e-11	2.34992e-11	2.17561e-11	1.78507e-11	1.575e-11	1.82443e-11	2.18608e-11
15.72	1.95798e-11	2.29599e-11	2.1493e-11	2.1493e-11	2.71242e-11	2.197e-11	2.55976e-11	2.32122e-11	2.22347e-11	3.31498e-11	2.00034e-11	1.55524e-11	3.06263e-11	2.43994e-11	2.94799e-11	2.23954e-11	1.92317e-11	2.05713e-11	1.62168e-11	2.68202e-11	2.27431e-11	1.92057e-11	1.99526e-11	2.34954e-11	2.17476e-11	1.78532e-11	1.57661e-11	1.82428e-11	2.18523e-11
15.74	1.95824e-11	2.29555e-11	2.14924e-11	2.14924e-11	2.71256e-11	2.19714e-11	2.56005e-11	2.32088e-11	2.22325e-11	3.31428e-11	1.99997e-11	1.55548e-11	3.06291e-11	2.44e-11	2.94776e-11	2.23969e-11	1.92388e-11	2.05721e-11	1.62161e-11	2.68463e-11	2.27392e-11	1.92092e-11	1.99542e-11	2.34996e-11	2.17534e-11	1.78584e-11	1.57653e-11	1.82383e-11	2.18645e-11
15.76	1.9587e-11	2.29546e-11	2.14893e-11	2.14893e-11	2.71244e-11	2.19761e-11	2.55989e-11	2.32143e-11	2.22315e-11	3.31477e-11	1.99991e-11	1.55563e-11	3.06264e-11	2.44037e-11	2.948e-11	2.23985e-11	1.92363e-11	2.05555e-11	1.62072e-11	2.68554e-11	2.27497e-11	1.92114e-11	1.99471e-11	2.34986e-11	2.1751e-11	1.78627e-11	1.57638e-11	1.8246e-11	2.18666e-11
15.78	1.95736e-11	2.2954e-11	2.1493e-11	2.1493e-11	2.71232e-11	2.19728e-11	2.55995e-11	2.3211e-11	2.22313e-11	3.31469e-11	2.00041e-11	1.55532e-11	3.06281e-11	2.43968e-11	2.94749e-11	2.23914e-11	1.92373e-11	2.05674e-11	1.62275e-11	2.68491e-11	2.2752e-11	1.92102e-11	1.99476e-11	2.34981e-11	2.17511e-11	1.7852e-11	1.57708e-11	1.82429e-11	2.18566e-11
15.8	1.95745e-11	2.29657e-11	2.1492e-11	2.1492e-11	2.71222e-11	2.19733e-11	2.55901e-11	2.32115e-11	2.22293e-11	3.31517e-11	1.99988e-11	1.55532e-11	3.06287e-11	2.44009e-11	2.94793e-11	2.23921e-11	1.92307e-11	2.05646e-11	1.6222e-11	2.68626e-11	2.27458e-11	1.92153e-11	1.9954e-11	2.35025e-11	2.17499e-11	1.78465e-11	1.57678e-11	1.82432e-11	2.18555e-11
15.82	1.95852e-11	2.2963e-11	2.14905e-11	2.14905e-11	2.71283e-11	2.19705e-11	2.56004e-11	2.32111e-11	2.22349e-11	3.31464e-11	2.00016e-11	1.55522e-11	3.06239e-11	2.43963e-11	2.94811e-11	2.23911e-11	1.92355e-11	2.05701e-11	1.62218e-11	2.68371e-11	2.2745e-11	1.92104e-11	1.99514e-11	2.35004e-11	2.17555e-11	1.78459e-11	1.57673e-11	1.82389e-11	2.1865e-11
15.84	1.95758e-11	2.29596e-11	2.14879e-11	2.14879e-11	2.71252e-11	2.19741e-11	2.55955e-11	2.32087e-11	2.22329e-11	3.31428e-11	2.00053e-11	1.55502e-11	3.06278e-11	2.43988e-11	2.94793e-11	2.23907e-11	1.92341e-11	2.05724e-11	1.62166e-11	2.67966e-11	2.2748e-11	1.92133e-11	1.99486e-11	2.34978e-11	2.17506e-11	1.78477e-11	1.57652e-11	1.8238e-11	2.18682e-11
15.86	1.9576e-11	2.29548e-11	2.14876e-11	2.14876e-11	2.71229e-11	2.19772e-11	2.55951e-11	2.3215e-11	2.22345e-11	3.31504e-11	2.00016e-11	1.55518e-11	3.06275e-11	2.43955e-11	2.94802e-11	2.2396e-11	1.92351e-11	2.05752e-11	1.62164e-11	2.68268e-11	2.27492e-11	1.92113e-11	1.9954e-11	2.34901e-11	2.17532e-11	1.78579e-11	1.57704e-11	1.82418e-11	2.18656e-11
15.88	1.95767e-11	2.29627e-11	2.14921e-11	2.14921e-11	2.71272e-11	2.19765e-11	2.55973e-11	2.32118e-11	2.22368e-11	3.3149e-11	2.00073e-11	1.55536e-11	3.06236e-11	2.44038e-11	2.94856e-11	2.23973e-11	1.92388e-11	2.05658e-11	1.62111e-11	2.68325e-11	2.27461e-11	1.9215e-11	1.99508e-11	2.35038e-11	2.17538e-11	1.78583e-11	1.57737e-11	1.82308e-11	2.18732e-11
15.9	1.95828e-11	2.29652e-11	2.14881e-11	2.14881e-11	2.71198e-11	2.1975e-11	2.55977e-11	2.32099e-11	2.22337e-11	3.31504e-11	2.00025e-11	1.55481e-11	3.06287e-11	2.43958e-11	2.9479e-11	2.23948e-11	1.9235e-11	2.05736e-11	1.62239e-11	2.68422e-11	2.27461e-11	1.92136e-11	1.99487e-11	2.35029e-11	2.17546e-11	1.78571e-11	1.57473e-11	1.8244e-11	2.18593e-11
15.92	1.95814e-11	2.29584e-11	2.149e-11	2.149e-11	2.71211e-11	2.19741e-11	2.56023e-11	2.32106e-11	2.22256e-11	3.31486e-11	2.00031e-11	1.55524e-11	3.0621e-11	2.44018e-11	2.94851e-11	2.23928e-11	1.9236e-11	2.05711e-11	1.62096e-11	2.68554e-11	2.27495e-11	1.92145e-11	1.99456e-11	2.34915e-11	2.17535e-11	1.78629e-11	1.57673e-11	1.82372e-11	2.18566e-11
15.94	1.95778e-11	2.2958e-11	2.14893e-11	2.14893e-11	2.7125e-11	2.19737e-11	2.5597e-11	2.32122e-11	2.2234e-11	3.31514e-11	1.99981e-11	1.55568e-11	3.06276e-11	2.43977e-11	2.94852e-11	2.23943e-11	1.92337e-11	2.05738e-11	1.62188e-11	2.68351e-11	2.27403e-11	1.92073e-11	1.99539e-11	2.34971e-11	2.17513e-11	1.78586e-11	1.57528e-11	1.82436e-11	2.18577e-11
15.96	1.95812e-11	2.29575e-11	2.14951e-11	2.14951e-11	2.71204e-11	2.1973e-11	2.55977e-11	2.32138e-11	2.22308e-11	3.315e-11	2.00003e-11	1.55558e-11	3.06213e-11	2.44015e-11	2.94771e-11	2.23913e-11	1.9232e-11	2.0574e-11	1.62062e-11	2.68235e-11	2.27481e-11	1.9193e-11	1.99503e-11	2.34998e-11	2.17487e-11	1.78673e-11	1.5767e-11	1.82438e-11	2.18652e-11
15.98	1.95768e-11	2.29564e-11	2.14918e-11	2.14918e-11	2.71244e-11	2.19728e-11	2.55989e-11	2.32111e-11	2.22301e-11	3.31416e-11	2.00066e-11	1.55506e-11	3.06206e-11	2.44021e-11	2.94791e-11	2.2396e-11	1.92325e-11	2.05619e-11	1.62073e-11	2.6853e-11	2.27412e-11	1.91092e-11	1.99473e-11	2.3498e-11	2.17464e-11	1.78578e-11	1.57728e-11	1.82457e-11	2.18656e-11
16	1.95803e-11	2.29598e-11	2.14886e-11	2.14886e-11	2.71273e-11	2.19779e-11	2.56029e-11	2.32082e-11	2.22279e-11	3.31496e-11	2.00051e-11	1.55511e-11	3.06228e-11	2.44013e-11	2.94761e-11	2.23993e-11	1.9229e-11	2.05713e-11	1.62132e-11	2.68462e-11	2.27448e-11	1.90008e-11	1.9953e-11	2.34982e-11	2.17508e-11	1.78635e-11	1.57618e-11	1.82412e-11	2.18656e-11
16.02	1.95779e-11	2.29554e-11	2.14849e-11	2.14849e-11	2.71245e-11	2.19733e-11	2.55918e-11	2.32106e-11	2.22317e-11	3.31513e-11	2.00034e-11	1.55538e-11	3.06238e-11	2.43998e-11	2.94829e-11	2.23972e-11	1.92364e-11	2.05684e-11	1.62102e-11	2.68449e-11	2.27385e-11	1.89265e-11	1.99499e-11	2.35001e-11	2.17513e-11	1.786e-11	1.57668e-11	1.82444e-11	2.18629e-11
16.04	1.95748e-11	2.29577e-11	2.14912e-11	2.14912e-11	2.71235e-11	2.19847e-11	2.55995e-11	2.32097e-11	2.22281e-11	3.31488e-11	2.00011e-11	1.55484e-11	3.06237e-11	2.43944e-11	2.94827e-11	2.23968e-11	1.9235e-11	2.05714e-11	1.62213e-11	2.6868e-11	2.27428e-11	1.88929e-11	1.99508e-11	2.34933e-11	2.17506e-11	1.78568e-11	1.57704e-11	1.82449e-11	2.18612e-11
16.06	1.95803e-11	2.29579e-11	2.14871e-11	2.14871e-11	2.71241e-11	2.19831e-11	2.55924e-11	2.32141e-11	2.22314e-11	3.31419e-11	2e-11	1.55481e-11	3.06268e-11	2.43963e-11	2.94774e-11	2.23988e-11	1.92346e-11	2.05644e-11	1.62178e-11	2.68203e-11	2.2748e-11	1.8871e-11	1.99517e-11	2.34941e-11	2.1754e-11	1.78669e-11	1.57771e-11	1.82445e-11	2.18575e-11
16.08	1.95845e-11	2.29628e-11	2.1491e-11	2.1491e-11	2.71217e-11	2.1987e-11	2.55983e-11	2.32133e-11	2.22281e-11	3.31585e-11	2.00029e-11	1.55524e-11	3.06238e-11	2.43986e-11	2.94799e-11	2.23955e-11	1.92344e-11	2.05748e-11	1.62035e-11	2.68303e-11	2.27413e-11	1.88634e-11	1.99493e-11	2.34939e-11	2.17538e-11	1.78551e-11	1.5759e-11	1.82423e-11	2.1866e-11
16.1	1.95723e-11	2.29545e-11	2.14883e-11	2.14883e-11	2.71225e-11	2.19788e-11	2.55898e-11	2.32065e-11	2.22305e-11	3.31517e-11	2.00022e-11	1.55495e-11	3.06255e-11	2.43935e-11	2.94795e-11	2.23942e-11	1.92327e-11	2.05687e-11	1.62006e-11	2.68234e-11	2.27523e-11	1.88505e-11	1.99511e-11	2.34962e-11	2.17456e-11	1.78599e-11	1.57607e-11	1.82398e-11	2.18666e-11
16.12	1.95812e-11	2.29589e-11	2.14906e-11	2.14906e-11	2.71291e-11	2.19756e-11	2.56037e-11	2.32087e-11	2.22311e-11	3.31491e-11	1.99954e-11	1.55504e-11	3.06265e-11	2.44006e-11	2.94769e-11	2.23969e-11	1.92354e-11	2.05643e-11	1.62109e-11	2.68195e-11	2.27405e-11	1.88562e-11	1.99522e-11	2.35011e-11	2.17501e-11	1.78561e-11	1.57703e-11	1.82416e-11	2.18676e-11
16.14	1.95755e-11	2.29569e-11	2.14844e-11	2.14844e-11	2.71252e-11	2.19817e-11	2.55947e-11	2.32053e-11	2.22302e-11	3.31523e-11	2.00031e-11	1.55547e-11	3.06246e-11	2.43948e-11	2.94803e-11	2.2403e-11	1.92363e-11	2.05572e-11	1.62121e-11	2.68516e-11	2.27472e-11	1.88613e-11	1.99544e-11	2.35007e-11	2.17541e-11	1.78519e-11	1.57637e-11	1.82471e-11	2.18637e-11
16.16	1.95705e-11	2.29608e-11	2.14885e-11	2.14885e-11	2.71201e-11	2.1985e-11	2.55966e-11	2.32143e-11	2.2227e-11	3.31523e-11	2.00003e-11	1.55517e-11	3.06259e-11	2.4401e-11	2.94793e-11	2.23968e-11	1.9237e-11	2.0557e-11	1.62045e-11	2.68141e-11	2.27384e-11	1.8855e-11	1.99516e-11	2.34957e-11	2.17551e-11	1.78561e-11	1.57626e-11	1.82449e-11	2.18647e-11
16.18	1.95727e-11	2.29607e-11	2.14905e-11	2.14905e-11	2.71258e-11	2.19721e-11	2.55954e-11	2.32153e-11	2.22299e-11	3.31483e-11	2.00039e-11	1.55541e-11	3.06253e-11	2.44056e-11	2.94821e-11	2.23919e-11	1.92313e-11	2.0562e-11	1.62145e-11	2.68397e-11	2.27492e-11	1.88557e-11	1.99544e-11	2.34895e-11	2.17502e-11	1.78463e-11	1.57664e-11	1.82425e-11	2.18581e-11
16.2	1.9574e-11	2.29621e-11	2.14899e-11	2.14899e-11	2.71224e-11	2.19727e-11	2.55936e-11	2.32115e-11	2.22302e-11	3.31572e-11	2.00051e-11	1.5555e-11	3.06233e-11	2.43991e-11	2.94842e-11	2.24003e-11	1.92275e-11	2.05706e-11	1.62218e-11	2.68378e-11	2.27427e-11	1.8858e-11	1.99502e-11	2.34992e-11	2.17534e-11	1.7876e-11	1.57712e-11	1.82419e-11	2.18688e-11
16.22	1.95755e-11	2.29645e-11	2.14917e-11	2.14917e-11	2.71216e-11	2.19805e-11	2.55977e-11	2.32078e-11	2.22266e-11	3.31529e-11	2.00028e-11	1.55509e-11	3.06298e-11	2.44007e-11	2.94838e-11	2.23945e-11	1.92292e-11	2.05648e-11	1.62215e-11	2.68592e-11	2.27455e-11	1.88557e-11	1.99483e-11	2.34965e-11	2.17515e-11	1.7855e-11	1.57652e-11	1.82461e-11	2.18617e-11
16.24	1.95742e-11	2.29588e-11	2.1494e-11	2.1494e-11	2.71204e-11	2.19694e-11	2.56005e-11	2.32117e-11	2.22292e-11	3.31522e-11	2.00037e-11	1.55528e-11	3.06247e-11	2.43975e-11	2.94811e-11	2.23958e-11	1.92348e-11	2.05694e-11	1.62237e-11	2.68327e-11	2.27511e-11	1.88492e-11	1.99521e-11	2.34964e-11	2.17543e-11	1.78567e-11	1.57674e-11	1.82439e-11	2.18687e-11
16.26	1.95752e-11	2.29581e-11	2.14914e-11	2.14914e-11	2.71248e-11	2.19788e-11	2.55997e-11	2.32154e-11	2.22315e-11	3.31501e-11	2.00017e-11	1.55463e-11	3.06292e-11	2.44017e-11	2.9484e-11	2.23966e-11	1.92347e-11	2.05746e-11	1.62258e-11	2.68462e-11	2.27472e-11	1.88531e-11	1.99499e-11	2.34878e-11	2.1762e-11	1.78458e-11	1.57628e-11	1.82406e-11	2.187e-11
16.28	1.95702e-11	2.29608e-11	2.1492e-11	2.1492e-11	2.7122e-11	2.19715e-11	2.55949e-11	2.32108e-11	2.22283e-11	3.31511e-11	2.00009e-11	1.55486e-11	3.06297e-11	2.43948e-11	2.9482e-11	2.23946e-11	1.92344e-11	2.05667e-11	1.62224e-11	2.68341e-11	2.27493e-11	1.88502e-11	1.99458e-11	2.34987e-11	2.17495e-11	1.78478e-11	1.57723e-11	1.82462e-11	2.1855e-11
16.3	1.95736e-11	2.29554e-11	2.14906e-11	2.14906e-11	2.71255e-11	2.19729e-11	2.55982e-11	2.32147e-11	2.22322e-11	3.31547e-11	2.00058e-11	1.55521e-11	3.0628e-11	2.43984e-11	2.9481e-11	2.23985e-11	1.92308e-11	2.05606e-11	1.62125e-11	2.68512e-11	2.27396e-11	1.88484e-11	1.9952e-11	2.35007e-11	2.1756e-11	1.78547e-11	1.57707e-11	1.82449e-11	2.18647e-11
16.32	1.95748e-11	2.2959e-11	2.14888e-11	2.14888e-11	2.71259e-11	2.19771e-11	2.56011e-11	2.32096e-11	2.22324e-11	3.31558e-11	2.00048e-11	1.55504e-11	3.06229e-11	2.43965e-11	2.9486e-11	2.24016e-11	1.9237e-11	2.05663e-11	1.62138e-11	2.6878e-11	2.27396e-11	1.88473e-11	1.99527e-11	2.34962e-11	2.17568e-11	1.78513e-11	1.57526e-11	1.82411e-11	2.18645e-11
16.34	1.95783e-11	2.29647e-11	2.14887e-11	2.14887e-11	2.71216e-11	2.19718e-11	2.56011e-11	2.3212e-11	2.22282e-11	3.31507e-11	2.00065e-11	1.55523e-11	3.06261e-11	2.43974e-11	2.9487e-11	2.23971e-11	1.92369e-11	2.05728e-11	1.62143e-11	2.68352e-11	2.27345e-11	1.88432e-11	1.99555e-11	2.34962e-11	2.17532e-11	1.78583e-11	1.57668e-11	1.82378e-11	2.18612e-11
16.36	1.95729e-11	2.29545e-11	2.14911e-11	2.14911e-11	2.71227e-11	2.19737e-11	2.56047e-11	2.32081e-11	2.22314e-11	3.31589e-11	2.00025e-11	1.55503e-11	3.06264e-11	2.44006e-11	2.94814e-11	2.23985e-11	1.92346e-11	2.05722e-11	1.62263e-11	2.6833e-11	2.27411e-11	1.88445e-11	1.99506e-11	2.34953e-11	2.17537e-11	1.7849e-11	1.5755e-11	1.8242e-11	2.18712e-11
16.38	1.95747e-11	2.29627e-11	2.14885e-11	2.14885e-11	2.71237e-11	2.19772e-11	2.56031e-11	2.32083e-11	2.22269e-11	3.31486e-11	2.00027e-11	1.55521e-11	3.06274e-11	2.43999e-11	2.94818e-11	2.23966e-11	1.92395e-11	2.05649e-11	1.6222e-11	2.68577e-11	2.27445e-11	1.88476e-11	1.99507e-11	2.34927e-11	2.1749e-11	1.78288e-11	1.57674e-11	1.82499e-11	2.18616e-11
16.4	1.95729e-11	2.29564e-11	2.14912e-11	2.14912e-11	2.71258e-11	2.19748e-11	2.56013e-11	2.32098e-11	2.22311e-11	3.31508e-11	2.00048e-11	1.55502e-11	3.06246e-11	2.43973e-11	2.94803e-11	2.23963e-11	1.92344e-11	2.05788e-11	1.62166e-11	2.68555e-11	2.2744e-11	1.88407e-11	1.99543e-11	2.3493e-11	2.17561e-11	1.78371e-11	1.57739e-11	1.82411e-11	2.18676e-11
16.42	1.95691e-11	2.29591e-11	2.14843e-11	2.14843e-11	2.7123e-11	2.19736e-11	2.55998e-11	2.3209e-11	2.2229e-11	3.31491e-11	2.0006e-11	1.55525e-11	3.0634e-11	2.43985e-11	2.94818e-11	2.23987e-11	1.9234e-11	2.0576e-11	1.62136e-11	2.68556e-11	2.27475e-11	1.88378e-11	1.99516e-11	2.34993e-11	2.1753e-11	1.78536e-11	1.57668e-11	1.82439e-11	2.18673e-11
16.44	1.95703e-11	2.29591e-11	2.14901e-11	2.14901e-11	2.71238e-11	2.19771e-11	2.55985e-11	2.32114e-11	2.22333e-11	3.31469e-11	1.99994e-11	1.55451e-11	3.06275e-11	2.44022e-11	2.94817e-11	2.23995e-11	1.92374e-11	2.05706e-11	1.62217e-11	2.68518e-11	2.27411e-11	1.88324e-11	1.99513e-11	2.34868e-11	2.17523e-11	1.78554e-11	1.57773e-11	1.82491e-11	2.18643e-11
16.46	1.95743e-11	2.29583e-11	2.1485e-11	2.1485e-11	2.71221e-11	2.19771e-11	2.55968e-11	2.32128e-11	2.22338e-11	3.31595e-11	2.00048e-11	1.55484e-11	3.06267e-11	2.44003e-11	2.94854e-11	2.2399e-11	1.92312e-11	2.05735e-11	1.62148e-11	2.6848e-11	2.27533e-11	1.88393e-11	1.99524e-11	2.34896e-11	2.17518e-11	1.78515e-11	1.57758e-11	1.82393e-11	2.18614e-11
16.48	1.9563e-11	2.29557e-11	2.14911e-11	2.14911e-11	2.71251e-11	2.1978e-11	2.56011e-11	2.3211e-11	2.22288e-11	3.31537e-11	2.00003e-11	1.55502e-11	3.06272e-11	2.44003e-11	2.94858e-11	2.23934e-11	1.92298e-11	2.05676e-11	1.62171e-11	2.68341e-11	2.27501e-11	1.88379e-11	1.99521e-11	2.34942e-11	2.1754e-11	1.78476e-11	1.57718e-11	1.82387e-11	2.18686e-11
16.5	1.95715e-11	2.29573e-11	2.14855e-11	2.14855e-11	2.7122e-11	2.19837e-11	2.55992e-11	2.32063e-11	2.223e-11	3.31513e-11	2e-11	1.55515e-11	3.06266e-11	2.43982e-11	2.94867e-11	2.2392e-11	1.92351e-11	2.0577e-11	1.62198e-11	2.68346e-11	2.27473e-11	1.88389e-11	1.99497e-11	2.34943e-11	2.17578e-11	1.78537e-11	1.57606e-11	1.82422e-11	2.18601e-11
16.52	1.95674e-11	2.29553e-11	2.14903e-11	2.14903e-11	2.71252e-11	2.19758e-11	2.55947e-11	2.32102e-11	2.22271e-11	3.31534e-11	2.00031e-11	1.55521e-11	3.06388e-11	2.43936e-11	2.94793e-11	2.23949e-11	1.92334e-11	2.05772e-11	1.62195e-11	2.68392e-11	2.27437e-11	1.8838e-11	1.99536e-11	2.34948e-11	2.17545e-11	1.78406e-11	1.57622e-11	1.82374e-11	2.18614e-11
16.54	1.95698e-11	2.29551e-11	2.14831e-11	2.14831e-11	2.71235e-11	2.19779e-11	2.55987e-11	2.32126e-11	2.22337e-11	3.31548e-11	1.99997e-11	1.55461e-11	3.06242e-11	2.43951e-11	2.94884e-11	2.24023e-11	1.92356e-11	2.05795e-11	1.62145e-11	2.68554e-11	2.27506e-11	1.88362e-11	1.99538e-11	2.34886e-11	2.17536e-11	1.78551e-11	1.5767e-11	1.82386e-11	2.18602e-11
16.56	1.95678e-11	2.2954e-11	2.14851e-11	2.14851e-11	2.7114e-11	2.1974e-11	2.55956e-11	2.32065e-11	2.22296e-11	3.31467e-11	2.00039e-11	1.5549e-11	3.06248e-11	2.43937e-11	2.94879e-11	2.23949e-11	1.92351e-11	2.05772e-11	1.62216e-11	2.68503e-11	2.27453e-11	1.88362e-11	1.9953e-11	2.34912e-11	2.17493e-11	1.7863e-11	1.57584e-11	1.82459e-11	2.18595e-11
16.58	1.95627e-11	2.29613e-11	2.1492e-11	2.1492e-11	2.71206e-11	2.19806e-11	2.55962e-11	2.32083e-11	2.22283e-11	3.31471e-11	2.00094e-11	1.55476e-11	3.06199e-11	2.43999e-11	2.94892e-11	2.23982e-11	1.92326e-11	2.05748e-11	1.62099e-11	2.68193e-11	2.27465e-11	1.88241e-11	1.99529e-11	2.34915e-11	2.17518e-11	1.78542e-11	1.57742e-11	1.82488e-11	2.18615e-11
16.6	1.95664e-11	2.2956e-11	2.1491e-11	2.1491e-11	2.7122e-11	2.19802e-11	2.56043e-11	2.32063e-11	2.22388e-11	3.31504e-11	2.00005e-11	1.55467e-11	3.06201e-11	2.44015e-11	2.94844e-11	2.23978e-11	1.92336e-11	2.05749e-11	1.62212e-11	2.68446e-11	2.27449e-11	1.88258e-11	1.99551e-11	2.34921e-11	2.17503e-11	1.78554e-11	1.57667e-11	1.8256e-11	2.18577e-11
16.62	1.95706e-11	2.29577e-11	2.14935e-11	2.14935e-11	2.71235e-11	2.1973e-11	2.5604e-11	2.32084e-11	2.22334e-11	3.31518e-11	2.00012e-11	1.55514e-11	3.06249e-11	2.44002e-11	2.94835e-11	2.23902e-11	1.92386e-11	2.05718e-11	1.62242e-11	2.68387e-11	2.27451e-11	1.88289e-11	1.99546e-11	2.3493e-11	2.17462e-11	1.78597e-11	1.57655e-11	1.82517e-11	2.18653e-11
16.64	1.95639e-11	2.2954e-11	2.14873e-11	2.14873e-11	2.71208e-11	2.19844e-11	2.55996e-11	2.3213e-11	2.22303e-11	3.31518e-11	2.00004e-11	1.55486e-11	3.06242e-11	2.44002e-11	2.94821e-11	2.23946e-11	1.9237e-11	2.05732e-11	1.62264e-11	2.68241e-11	2.27472e-11	1.88252e-11	1.99566e-11	2.34932e-11	2.17567e-11	1.78526e-11	1.57704e-11	1.82494e-11	2.18644e-11
16.66	1.95719e-11	2.29591e-11	2.14889e-11	2.14889e-11	2.71204e-11	2.19776e-11	2.56076e-11	2.32093e-11	2.22294e-11	3.31515e-11	2.00034e-11	1.55459e-11	3.06247e-11	2.44019e-11	2.94811e-11	2.2396e-11	1.92322e-11	2.0566e-11	1.62129e-11	2.68538e-11	2.27443e-11	1.8826e-11	1.99541e-11	2.34928e-11	2.17561e-11	1.78406e-11	1.57773e-11	1.82394e-11	2.1865e-11
16.68	1.95662e-11	2.29586e-11	2.14887e-11	2.14887e-11	2.71206e-11	2.19757e-11	2.55995e-11	2.32089e-11	2.22325e-11	3.31542e-11	2.00025e-11	1.55447e-11	3.06237e-11	2.43917e-11	2.94819e-11	2.24025e-11	1.92362e-11	2.05748e-11	1.62163e-11	2.68484e-11	2.27516e-11	1.88265e-11	1.99511e-11	2.34964e-11	2.17526e-11	1.78585e-11	1.57555e-11	1.82466e-11	2.18673e-11
16.7	1.95657e-11	2.29551e-11	2.14905e-11	2.14905e-11	2.71241e-11	2.19727e-11	2.55983e-11	2.32098e-11	2.22271e-11	3.31484e-11	2.00048e-11	1.55528e-11	3.06238e-11	2.44027e-11	2.94815e-11	2.2396e-11	1.92338e-11	2.05686e-11	1.62327e-11	2.68597e-11	2.27468e-11	1.8829e-11	1.99583e-11	2.34907e-11	2.17555e-11	1.78631e-11	1.57723e-11	1.82451e-11	2.18642e-11
16.72	1.95677e-11	2.29621e-11	2.14858e-11	2.14858e-11	2.7121e-11	2.19725e-11	2.56032e-11	2.3207e-11	2.22266e-11	3.31471e-11	1.99965e-11	1.55529e-11	3.06236e-11	2.43984e-11	2.94805e-11	2.23963e-11	1.92353e-11	2.0568e-11	1.62295e-11	2.68466e-11	2.27393e-11	1.88279e-11	1.99568e-11	2.34953e-11	2.17584e-11	1.78636e-11	1.57709e-11	1.82451e-11	2.18649e-11
16.74	1.95687e-11	2.2958e-11	2.14886e-11	2.14886e-11	2.71211e-11	2.19782e-11	2.55975e-11	2.32102e-11	2.22347e-11	3.31492e-11	2.00033e-11	1.55508e-11	3.06238e-11	2.44024e-11	2.94819e-11	2.2395e-11	1.9234e-11	2.05729e-11	1.62283e-11	2.68536e-11	2.27417e-11	1.88241e-11	1.9955e-11	2.3493e-11	2.17568e-11	1.78612e-11	1.57758e-11	1.82473e-11	2.18697e-11
16.76	1.95691e-11	2.29575e-11	2.14965e-11	2.14965e-11	2.71177e-11	2.19815e-11	2.56023e-11	2.32091e-11	2.22292e-11	3.31485e-11	1.99998e-11	1.55559e-11	3.06247e-11	2.44081e-11	2.94828e-11	2.23962e-11	1.92376e-11	2.05682e-11	1.62279e-11	2.68601e-11	2.27505e-11	1.88215e-11	1.99516e-11	2.34963e-11	2.17501e-11	1.78708e-11	1.5769e-11	1.8246e-11	2.18658e-11
16.78	1.95641e-11	2.29599e-11	2.14913e-11	2.14913e-11	2.71205e-11	2.19754e-11	2.55951e-11	2.32086e-11	2.22265e-11	3.31561e-11	2.00011e-11	1.55485e-11	3.06297e-11	2.43919e-11	2.94825e-11	2.24023e-11	1.92376e-11	2.05721e-11	1.62334e-11	2.68715e-11	2.27411e-11	1.88216e-11	1.99561e-11	2.34936e-11	2.17506e-11	1.7863e-11	1.57598e-11	1.82429e-11	2.18719e-11
16.8	1.95663e-11	2.29582e-11	2.14893e-11	2.14893e-11	2.7115e-11	2.19803e-11	2.56011e-11	2.32064e-11	2.22287e-11	3.31525e-11	1.9998e-11	1.5551e-11	3.06251e-11	2.44003e-11	2.94854e-11	2.23966e-11	1.92343e-11	2.05792e-11	1.6225e-11	2.68376e-11	2.27456e-11	1.88189e-11	1.99525e-11	2.34913e-11	2.17529e-11	1.78586e-11	1.57718e-11	1.82472e-11	2.1867e-11
16.82	1.95745e-11	2.29541e-11	2.14901e-11	2.14901e-11	2.71217e-11	2.19768e-11	2.56035e-11	2.32096e-11	2.22319e-11	3.31523e-11	2.00051e-11	1.55495e-11	3.06248e-11	2.44013e-11	2.94883e-11	2.23921e-11	1.92307e-11	2.05693e-11	1.62333e-11	2.68422e-11	2.27417e-11	1.88234e-11	1.99539e-11	2.34933e-11	2.17584e-11	1.78554e-11	1.577e-11	1.82495e-11	2.18661e-11
16.84	1.95691e-11	2.29584e-11	2.14837e-11	2.14837e-11	2.71195e-11	2.1979e-11	2.5602e-11	2.32068e-11	2.22249e-11	3.31483e-11	1.99999e-11	1.55471e-11	3.06229e-11	2.43975e-11	2.94871e-11	2.23971e-11	1.92362e-11	2.05754e-11	1.62273e-11	2.68517e-11	2.27492e-11	1.8818e-11	1.9952e-11	2.34946e-11	2.17523e-11	1.78659e-11	1.57794e-11	1.82467e-11	2.18712e-11
16.86	1.95704e-11	2.29565e-11	2.14861e-11	2.14861e-11	2.71242e-11	2.19753e-11	2.5599e-11	2.32077e-11	2.22246e-11	3.31505e-11	2.0002e-11	1.55479e-11	3.0627e-11	2.43977e-11	2.94819e-11	2.23957e-11	1.9239e-11	2.05785e-11	1.62279e-11	2.6831e-11	2.27505e-11	1.882e-11	1.99529e-11	2.34932e-11	2.17484e-11	1.7859e-11	1.57712e-11	1.82469e-11	2.18701e-11
16.88	1.95626e-11	2.29574e-11	2.1485e-11	2.1485e-11	2.712e-11	2.19695e-11	2.56088e-11	2.32107e-11	2.22248e-11	3.31554e-11	2.0004e-11	1.55528e-11	3.06276e-11	2.43977e-11	2.9489e-11	2.23905e-11	1.92391e-11	2.05734e-11	1.62239e-11	2.68445e-11	2.27479e-11	1.882e-11	1.9957e-11	2.34943e-11	2.17502e-11	1.785e-11	1.57662e-11	1.82433e-11	2.18638e-11
16.9	1.95646e-11	2.29581e-11	2.14876e-11	2.14876e-11	2.71274e-11	2.19777e-11	2.55987e-11	2.32027e-11	2.22277e-11	3.31472e-11	1.99993e-11	1.55479e-11	3.06228e-11	2.4403e-11	2.94871e-11	2.24005e-11	1.92391e-11	2.05783e-11	1.62158e-11	2.68253e-11	2.27494e-11	1.88197e-11	1.99506e-11	2.34957e-11	2.17511e-11	1.78623e-11	1.57759e-11	1.82419e-11	2.18674e-11
16.92	1.9567e-11	2.29551e-11	2.14937e-11	2.14937e-11	2.71205e-11	2.19778e-11	2.55989e-11	2.32082e-11	2.2227e-11	3.31491e-11	2.00022e-11	1.5547e-11	3.0629e-11	2.44024e-11	2.949e-11	2.23954e-11	1.92309e-11	2.05789e-11	1.62154e-11	2.68536e-11	2.27477e-11	1.88127e-11	1.99517e-11	2.34918e-11	2.17517e-11	1.78557e-11	1.57713e-11	1.82484e-11	2.18594e-11
16.94	1.95645e-11	2.29579e-11	2.14858e-11	2.14858e-11	2.71173e-11	2.1978e-11	2.56077e-11	2.32085e-11	2.22322e-11	3.31478e-11	2.00042e-11	1.55494e-11	3.06258e-11	2.43997e-11	2.94879e-11	2.23944e-11	1.92331e-11	2.05771e-11	1.62154e-11	2.68589e-11	2.27424e-11	1.88212e-11	1.99529e-11	2.3494e-11	2.17557e-11	1.78514e-11	1.57692e-11	1.82371e-11	2.18663e-11
16.96	1.95616e-11	2.29555e-11	2.14909e-11	2.14909e-11	2.71203e-11	2.19754e-11	2.56067e-11	2.321e-11	2.22342e-11	3.31509e-11	2.00032e-11	1.55502e-11	3.06273e-11	2.44062e-11	2.9484e-11	2.23958e-11	1.92364e-11	2.05702e-11	1.62208e-11	2.68419e-11	2.27415e-11	1.88168e-11	1.99522e-11	2.34912e-11	2.17533e-11	1.78491e-11	1.57627e-11	1.82517e-11	2.18755e-11
16.98	1.95625e-11	2.29576e-11	2.14884e-11	2.14884e-11	2.71182e-11	2.19711e-11	2.55986e-11	2.32125e-11	2.22262e-11	3.31571e-11	2.0004e-11	1.555e-11	3.0627e-11	2.43975e-11	2.94826e-11	2.23963e-11	1.92376e-11	2.05642e-11	1.62327e-11	2.68487e-11	2.27439e-11	1.88143e-11	1.99562e-11	2.34885e-11	2.17542e-11	1.78496e-11	1.57664e-11	1.82381e-11	2.18592e-11
17	1.95691e-11	2.29549e-11	2.14897e-11	2.14897e-11	2.71216e-11	2.19778e-11	2.56037e-11	2.32117e-11	2.22315e-11	3.31564e-11	2.00036e-11	1.55443e-11	3.06258e-11	2.43986e-11	2.94842e-11	2.23946e-11	1.92366e-11	2.05662e-11	1.62215e-11	2.68496e-11	2.27384e-11	1.88186e-11	1.99573e-11	2.34908e-11	2.17528e-11	1.78524e-11	1.57665e-11	1.82474e-11	2.18603e-11
17.02	1.95609e-11	2.29532e-11	2.14894e-11	2.14894e-11	2.71276e-11	2.19728e-11	2.56019e-11	2.32092e-11	2.22334e-11	3.31498e-11	2.00059e-11	1.55534e-11	3.06241e-11	2.44014e-11	2.94826e-11	2.23922e-11	1.92402e-11	2.05718e-11	1.62203e-11	2.68353e-11	2.27531e-11	1.88196e-11	1.99564e-11	2.34872e-11	2.17472e-11	1.785e-11	1.57638e-11	1.82458e-11	2.18634e-11
17.04	1.95647e-11	2.29538e-11	2.14887e-11	2.14887e-11	2.71192e-11	2.1977e-11	2.55984e-11	2.32153e-11	2.22324e-11	3.31501e-11	2.00024e-11	1.55507e-11	3.06244e-11	2.43964e-11	2.94834e-11	2.23968e-11	1.92331e-11	2.05735e-11	1.62138e-11	2.68616e-11	2.27434e-11	1.88127e-11	1.99551e-11	2.34885e-11	2.17476e-11	1.7866e-11	1.57625e-11	1.82439e-11	2.18642e-11
17.06	1.95601e-11	2.29598e-11	2.14839e-11	2.14839e-11	2.71173e-11	2.19761e-11	2.56064e-11	2.32026e-11	2.22331e-11	3.31466e-11	2.00054e-11	1.55501e-11	3.06251e-11	2.43964e-11	2.94895e-11	2.24005e-11	1.92364e-11	2.05769e-11	1.62198e-11	2.68367e-11	2.27536e-11	1.88105e-11	1.99507e-11	2.34863e-11	2.17482e-11	1.78697e-11	1.57668e-11	1.8245e-11	2.18619e-11
17.08	1.95602e-11	2.29587e-11	2.14922e-11	2.14922e-11	2.71198e-11	2.19739e-11	2.56043e-11	2.32083e-11	2.22312e-11	3.31538e-11	1.99995e-11	1.55548e-11	3.06305e-11	2.4397e-11	2.94829e-11	2.23915e-11	1.924e-11	2.05674e-11	1.62236e-11	2.68403e-11	2.27466e-11	1.88172e-11	1.99507e-11	2.34908e-11	2.17548e-11	1.78603e-11	1.57553e-11	1.82403e-11	2.1863e-11
17.1	1.95668e-11	2.29565e-11	2.14864e-11	2.14864e-11	2.71152e-11	2.19748e-11	2.55973e-11	2.32105e-11	2.2233e-11	3.3155e-11	2.00062e-11	1.55513e-11	3.06269e-11	2.43939e-11	2.94832e-11	2.2401e-11	1.92378e-11	2.05706e-11	1.62243e-11	2.68501e-11	2.27515e-11	1.88116e-11	1.99475e-11	2.34905e-11	2.17472e-11	1.78608e-11	1.57798e-11	1.82506e-11	2.18693e-11
17.12	1.95664e-11	2.29605e-11	2.14898e-11	2.14898e-11	2.71221e-11	2.1982e-11	2.55993e-11	2.32051e-11	2.22327e-11	3.31449e-11	2.00047e-11	1.55424e-11	3.06278e-11	2.43975e-11	2.94855e-11	2.23947e-11	1.92358e-11	2.05726e-11	1.62288e-11	2.68602e-11	2.27462e-11	1.88178e-11	1.99544e-11	2.34896e-11	2.17511e-11	1.78652e-11	1.57796e-11	1.82481e-11	2.18672e-11
17.14	1.95616e-11	2.29583e-11	2.14901e-11	2.14901e-11	2.71219e-11	2.19741e-11	2.56011e-11	2.32078e-11	2.22369e-11	3.31491e-11	2.00067e-11	1.55474e-11	3.06293e-11	2.4398e-11	2.94873e-11	2.23997e-11	1.92358e-11	2.05693e-11	1.62237e-11	2.68615e-11	2.27479e-11	1.88115e-11	1.99512e-11	2.34871e-11	2.17567e-11	1.7861e-11	1.57761e-11	1.82468e-11	2.18678e-11
17.16	1.95582e-11	2.29583e-11	2.14872e-11	2.14872e-11	2.71179e-11	2.19764e-11	2.56001e-11	2.3213e-11	2.22354e-11	3.31508e-11	1.99996e-11	1.55473e-11	3.06329e-11	2.43979e-11	2.94853e-11	2.23918e-11	1.92358e-11	2.0567e-11	1.62221e-11	2.68172e-11	2.27436e-11	1.88116e-11	1.99534e-11	2.34869e-11	2.17499e-11	1.78696e-11	1.57777e-11	1.82459e-11	2.18703e-11
17.18	1.95559e-11	2.29514e-11	2.14891e-11	2.14891e-11	2.71184e-11	2.19817e-11	2.56002e-11	2.32117e-11	2.22366e-11	3.31529e-11	2.00068e-11	1.55479e-11	3.06278e-11	2.4401e-11	2.94872e-11	2.23982e-11	1.92376e-11	2.05656e-11	1.62255e-11	2.6821e-11	2.27439e-11	1.88138e-11	1.99561e-11	2.3489e-11	2.17503e-11	1.78726e-11	1.5767e-11	1.82432e-11	2.18591e-11
17.2	1.95542e-11	2.29636e-11	2.14906e-11	2.14906e-11	2.71177e-11	2.19821e-11	2.55958e-11	2.32076e-11	2.22387e-11	3.31504e-11	2.00073e-11	1.5548e-11	3.06254e-11	2.43978e-11	2.94862e-11	2.23928e-11	1.92379e-11	2.05748e-11	1.62266e-11	2.68426e-11	2.27452e-11	1.88105e-11	1.99543e-11	2.34881e-11	2.1752e-11	1.78692e-11	1.577e-11	1.82443e-11	2.1864e-11
17.22	1.95573e-11	2.29576e-11	2.14853e-11	2.14853e-11	2.7121e-11	2.19756e-11	2.56036e-11	2.31993e-11	2.22349e-11	3.31514e-11	2.00022e-11	1.55456e-11	3.06245e-11	2.43984e-11	2.94827e-11	2.24019e-11	1.92429e-11	2.05806e-11	1.62175e-11	2.68385e-11	2.27506e-11	1.88089e-11	1.99527e-11	2.34866e-11	2.17543e-11	1.78742e-11	1.57492e-11	1.82486e-11	2.18668e-11
17.24	1.95658e-11	2.29539e-11	2.14915e-11	2.14915e-11	2.71205e-11	2.19774e-11	2.56017e-11	2.32059e-11	2.22418e-11	3.31487e-11	2.00033e-11	1.55462e-11	3.06263e-11	2.44005e-11	2.94807e-11	2.23954e-11	1.92387e-11	2.05697e-11	1.62345e-11	2.6839e-11	2.27494e-11	1.88123e-11	1.99561e-11	2.34869e-11	2.17573e-11	1.78622e-11	1.57603e-11	1.82435e-11	2.18617e-11
17.26	1.95587e-11	2.2955e-11	2.14871e-11	2.14871e-11	2.71264e-11	2.19777e-11	2.55995e-11	2.32052e-11	2.22337e-11	3.31486e-11	2.00007e-11	1.55479e-11	3.06234e-11	2.44022e-11	2.94794e-11	2.23945e-11	1.92339e-11	2.05694e-11	1.62276e-11	2.68057e-11	2.27512e-11	1.8808e-11	1.9953e-11	2.34835e-11	2.17494e-11	1.78705e-11	1.57725e-11	1.82466e-11	2.18671e-11
17.28	1.9564e-11	2.29602e-11	2.14905e-11	2.14905e-11	2.71197e-11	2.19712e-11	2.56087e-11	2.32007e-11	2.22349e-11	3.31511e-11	2.00056e-11	1.55425e-11	3.06259e-11	2.43996e-11	2.94866e-11	2.23991e-11	1.92349e-11	2.05687e-11	1.62293e-11	2.68267e-11	2.27455e-11	1.88112e-11	1.99574e-11	2.34861e-11	2.17541e-11	1.78735e-11	1.57687e-11	1.82462e-11	2.18664e-11
17.3	1.95609e-11	2.29578e-11	2.14872e-11	2.14872e-11	2.71196e-11	2.19745e-11	2.56061e-11	2.3208e-11	2.223e-11	3.31514e-11	1.99997e-11	1.55468e-11	3.06275e-11	2.44043e-11	2.94881e-11	2.2398e-11	1.92343e-11	2.05694e-11	1.62187e-11	2.68216e-11	2.27532e-11	1.88107e-11	1.99591e-11	2.34943e-11	2.17543e-11	1.78711e-11	1.57706e-11	1.82444e-11	2.18651e-11
17.32	1.95723e-11	2.29575e-11	2.1486e-11	2.1486e-11	2.71221e-11	2.19791e-11	2.56016e-11	2.32127e-11	2.22335e-11	3.31589e-11	2.00021e-11	1.55417e-11	3.06286e-11	2.44003e-11	2.94826e-11	2.23998e-11	1.92314e-11	2.05709e-11	1.62107e-11	2.68336e-11	2.27457e-11	1.88119e-11	1.99577e-11	2.34896e-11	2.17517e-11	1.78708e-11	1.57599e-11	1.8245e-11	2.18579e-11
17.34	1.95594e-11	2.2957e-11	2.14885e-11	2.14885e-11	2.71163e-11	2.19764e-11	2.56059e-11	2.32117e-11	2.22354e-11	3.31503e-11	2.00048e-11	1.55496e-11	3.06243e-11	2.44006e-11	2.94909e-11	2.23986e-11	1.92359e-11	2.05727e-11	1.62309e-11	2.6822e-11	2.27483e-11	1.88105e-11	1.99546e-11	2.34857e-11	2.17461e-11	1.78603e-11	1.57635e-11	1.82413e-11	2.1864e-11
17.36	1.95615e-11	2.29545e-11	2.1492e-11	2.1492e-11	2.71207e-11	2.19755e-11	2.56011e-11	2.32041e-11	2.22269e-11	3.31495e-11	2.00048e-11	1.55474e-11	3.06248e-11	2.43984e-11	2.94846e-11	2.23972e-11	1.9235e-11	2.05672e-11	1.62312e-11	2.68252e-11	2.27549e-11	1.88048e-11	1.99568e-11	2.3492e-11	2.17563e-11	1.7865e-11	1.57722e-11	1.82454e-11	2.18615e-11
17.38	1.9558e-11	2.29553e-11	2.14898e-11	2.14898e-11	2.71238e-11	2.19759e-11	2.56038e-11	2.32037e-11	2.2232e-11	3.31457e-11	2.00003e-11	1.55452e-11	3.06251e-11	2.43983e-11	2.94849e-11	2.23984e-11	1.9234e-11	2.05627e-11	1.62384e-11	2.6861e-11	2.27513e-11	1.88075e-11	1.99554e-11	2.34898e-11	2.17461e-11	1.78689e-11	1.57545e-11	1.82443e-11	2.18675e-11
17.4	1.95557e-11	2.29604e-11	2.1488e-11	2.1488e-11	2.71186e-11	2.19771e-11	2.5601e-11	2.32003e-11	2.22308e-11	3.31491e-11	2.00016e-11	1.55459e-11	3.06307e-11	2.43991e-11	2.94834e-11	2.23949e-11	1.92359e-11	2.05698e-11	1.62293e-11	2.68192e-11	2.2749e-11	1.8811e-11	1.99302e-11	2.34905e-11	2.17484e-11	1.78783e-11	1.57807e-11	1.82409e-11	2.18643e-11
17.42	1.95631e-11	2.29583e-11	2.14941e-11	2.14941e-11	2.71217e-11	2.19745e-11	2.5603e-11	2.32038e-11	2.22287e-11	3.31544e-11	2.0001e-11	1.55511e-11	3.06284e-11	2.44e-11	2.94871e-11	2.2401e-11	1.92349e-11	2.05764e-11	1.62156e-11	2.68262e-11	2.27519e-11	1.88099e-11	1.99306e-11	2.34909e-11	2.17568e-11	1.78614e-11	1.57635e-11	1.82502e-11	2.18665e-11
17.44	1.95638e-11	2.29551e-11	2.14886e-11	2.14886e-11	2.71206e-11	2.19726e-11	2.56062e-11	2.32001e-11	2.22328e-11	3.31518e-11	2.00025e-11	1.55503e-11	3.06331e-11	2.44038e-11	2.94853e-11	2.2398e-11	1.92359e-11	2.05694e-11	1.62141e-11	2.68294e-11	2.27485e-11	1.88086e-11	1.99325e-11	2.34915e-11	2.17585e-11	1.78737e-11	1.57595e-11	1.82432e-11	2.18603e-11
17.46	1.95619e-11	2.29602e-11	2.14915e-11	2.14915e-11	2.71206e-11	2.19793e-11	2.56056e-11	2.31989e-11	2.22366e-11	3.31507e-11	2.00064e-11	1.55504e-11	3.06327e-11	2.44018e-11	2.9486e-11	2.23976e-11	1.9233e-11	2.05695e-11	1.62211e-11	2.6834e-11	2.27514e-11	1.88119e-11	1.99404e-11	2.34916e-11	2.17549e-11	1.78773e-11	1.57696e-11	1.82474e-11	2.18659e-11
17.48	1.95595e-11	2.29574e-11	2.14859e-11	2.14859e-11	2.7119e-11	2.19783e-11	2.5599e-11	2.3205e-11	2.22348e-11	3.31546e-11	2.00025e-11	1.55459e-11	3.0631e-11	2.43951e-11	2.94839e-11	2.23969e-11	1.92283e-11	2.05719e-11	1.62164e-11	2.68137e-11	2.27422e-11	1.8805e-11	1.99343e-11	2.34889e-11	2.1748e-11	1.78716e-11	1.57694e-11	1.82473e-11	2.18617e-11
17.5	1.95599e-11	2.2959e-11	2.14938e-11	2.14938e-11	2.71238e-11	2.19709e-11	2.55996e-11	2.32059e-11	2.22315e-11	3.31517e-11	2.00071e-11	1.55493e-11	3.06276e-11	2.44043e-11	2.94853e-11	2.23993e-11	1.9232e-11	2.05679e-11	1.62183e-11	2.68163e-11	2.27436e-11	1.88068e-11	1.99397e-11	2.34892e-11	2.17518e-11	1.78674e-11	1.57665e-11	1.82425e-11	2.18702e-11
17.52	1.95555e-11	2.2957e-11	2.14916e-11	2.14916e-11	2.71215e-11	2.19785e-11	2.55985e-11	2.32085e-11	2.22353e-11	3.31566e-11	2.00049e-11	1.55494e-11	3.06343e-11	2.43954e-11	2.94896e-11	2.23986e-11	1.92363e-11	2.05747e-11	1.62157e-11	2.68627e-11	2.27508e-11	1.88035e-11	1.99403e-11	2.34816e-11	2.17527e-11	1.78612e-11	1.57665e-11	1.82496e-11	2.18648e-11
17.54	1.9552e-11	2.29554e-11	2.14899e-11	2.14899e-11	2.71184e-11	2.19789e-11	2.5601e-11	2.32074e-11	2.22338e-11	3.31549e-11	2.00016e-11	1.55467e-11	3.06344e-11	2.43964e-11	2.94867e-11	2.23954e-11	1.92307e-11	2.05699e-11	1.62053e-11	2.68342e-11	2.27532e-11	1.88072e-11	1.99414e-11	2.34831e-11	2.17592e-11	1.78664e-11	1.57604e-11	1.82439e-11	2.18682e-11
17.56	1.95614e-11	2.29595e-11	2.14883e-11	2.14883e-11	2.71229e-11	2.19717e-11	2.56044e-11	2.32054e-11	2.22338e-11	3.31548e-11	2.0004e-11	1.55513e-11	3.06327e-11	2.4394e-11	2.94878e-11	2.23973e-11	1.92324e-11	2.05673e-11	1.62237e-11	2.68481e-11	2.27497e-11	1.88025e-11	1.99431e-11	2.34835e-11	2.17493e-11	1.78647e-11	1.57632e-11	1.82469e-11	2.18594e-11
17.58	1.95546e-11	2.29625e-11	2.14923e-11	2.14923e-11	2.71191e-11	2.19747e-11	2.56046e-11	2.32058e-11	2.22357e-11	3.31479e-11	1.99981e-11	1.55473e-11	3.06269e-11	2.43954e-11	2.94842e-11	2.23982e-11	1.92405e-11	2.05701e-11	1.62232e-11	2.68339e-11	2.27436e-11	1.88077e-11	1.99442e-11	2.34834e-11	2.17549e-11	1.78647e-11	1.57652e-11	1.82481e-11	2.1864e-11
17.6	1.95618e-11	2.29567e-11	2.14874e-11	2.14874e-11	2.71213e-11	2.19754e-11	2.5599e-11	2.32088e-11	2.22314e-11	3.31466e-11	2.00027e-11	1.55496e-11	3.06248e-11	2.43942e-11	2.94816e-11	2.23929e-11	1.92364e-11	2.05697e-11	1.62209e-11	2.68255e-11	2.27451e-11	1.88001e-11	1.99457e-11	2.34837e-11	2.17516e-11	1.78727e-11	1.57634e-11	1.82493e-11	2.18617e-11
17.62	1.95598e-11	2.29547e-11	2.14899e-11	2.14899e-11	2.71178e-11	2.19779e-11	2.5602e-11	2.32076e-11	2.22283e-11	3.31552e-11	2.00041e-11	1.55521e-11	3.06268e-11	2.43966e-11	2.94865e-11	2.23959e-11	1.92347e-11	2.0574e-11	1.62177e-11	2.68291e-11	2.27483e-11	1.88015e-11	1.99412e-11	2.34862e-11	2.17547e-11	1.78699e-11	1.57624e-11	1.82453e-11	2.18618e-11
17.64	1.95604e-11	2.29622e-11	2.14896e-11	2.14896e-11	2.7119e-11	2.19765e-11	2.5599e-11	2.32073e-11	2.2237e-11	3.31556e-11	2.00048e-11	1.55531e-11	3.06312e-11	2.43973e-11	2.94871e-11	2.23966e-11	1.92399e-11	2.05597e-11	1.62365e-11	2.68478e-11	2.27477e-11	1.88035e-11	1.99497e-11	2.34806e-11	2.17567e-11	1.78718e-11	1.57602e-11	1.82469e-11	2.18613e-11
17.66	1.95573e-11	2.29532e-11	2.14849e-11	2.14849e-11	2.7121e-11	2.19744e-11	2.56027e-11	2.32065e-11	2.22328e-11	3.31536e-11	2.00079e-11	1.55456e-11	3.06306e-11	2.44002e-11	2.94852e-11	2.23993e-11	1.9231e-11	2.05633e-11	1.62343e-11	2.68359e-11	2.27451e-11	1.88043e-11	1.99456e-11	2.3482e-11	2.17518e-11	1.7856e-11	1.57762e-11	1.82401e-11	2.1866e-11
17.68	1.95602e-11	2.29529e-11	2.14881e-11	2.14881e-11	2.7124e-11	2.19778e-11	2.55991e-11	2.32018e-11	2.22309e-11	3.31588e-11	1.99995e-11	1.55505e-11	3.06343e-11	2.44013e-11	2.94891e-11	2.24026e-11	1.92353e-11	2.05673e-11	1.6234e-11	2.68427e-11	2.27489e-11	1.88068e-11	1.99484e-11	2.34843e-11	2.17531e-11	1.78743e-11	1.57648e-11	1.82488e-11	2.18599e-11
17.7	1.95603e-11	2.29556e-11	2.14806e-11	2.14806e-11	2.71205e-11	2.19701e-11	2.56045e-11	2.32038e-11	2.22323e-11	3.31537e-11	2.00094e-11	1.55481e-11	3.06287e-11	2.43961e-11	2.94845e-11	2.24015e-11	1.92358e-11	2.05651e-11	1.62253e-11	2.68114e-11	2.27487e-11	1.87966e-11	1.99487e-11	2.3483e-11	2.17461e-11	1.78675e-11	1.57707e-11	1.82531e-11	2.18641e-11
17.72	1.95576e-11	2.29534e-11	2.14897e-11	2.14897e-11	2.71186e-11	2.19718e-11	2.56051e-11	2.32035e-11	2.22286e-11	3.31475e-11	2.00079e-11	1.5551e-11	3.06317e-11	2.4397e-11	2.94815e-11	2.23994e-11	1.92292e-11	2.05695e-11	1.62205e-11	2.68589e-11	2.27381e-11	1.88029e-11	1.99492e-11	2.34879e-11	2.17542e-11	1.78651e-11	1.57615e-11	1.82473e-11	2.18663e-11
17.74	1.95611e-11	2.29596e-11	2.14892e-11	2.14892e-11	2.71193e-11	2.1976e-11	2.56025e-11	2.32055e-11	2.22364e-11	3.31565e-11	2.00001e-11	1.5552e-11	3.06282e-11	2.43957e-11	2.94776e-11	2.24001e-11	1.92319e-11	2.05666e-11	1.62092e-11	2.68667e-11	2.27441e-11	1.87995e-11	1.99475e-11	2.3486e-11	2.17543e-11	1.78741e-11	1.57513e-11	1.82448e-11	2.18689e-11
17.76	1.95623e-11	2.29548e-11	2.14907e-11	2.14907e-11	2.71131e-11	2.1974e-11	2.56043e-11	2.31965e-11	2.22354e-11	3.31514e-11	2.00067e-11	1.5549e-11	3.063e-11	2.43977e-11	2.94875e-11	2.24003e-11	1.92326e-11	2.05665e-11	1.62252e-11	2.68316e-11	2.27447e-11	1.87984e-11	1.99507e-11	2.34825e-11	2.17522e-11	1.78769e-11	1.57559e-11	1.82422e-11	2.18677e-11
17.78	1.95542e-11	2.29492e-11	2.14873e-11	2.14873e-11	2.71188e-11	2.1976e-11	2.55981e-11	2.31993e-11	2.22372e-11	3.31518e-11	2.00018e-11	1.55521e-11	3.06308e-11	2.43973e-11	2.94851e-11	2.23947e-11	1.92376e-11	2.05668e-11	1.62152e-11	2.68349e-11	2.27477e-11	1.8804e-11	1.9951e-11	2.34844e-11	2.17525e-11	1.78626e-11	1.57664e-11	1.82476e-11	2.18676e-11
17.8	1.95548e-11	2.2948e-11	2.14904e-11	2.14904e-11	2.71188e-11	2.19847e-11	2.56007e-11	2.31977e-11	2.22319e-11	3.315e-11	2.00014e-11	1.55511e-11	3.06324e-11	2.43955e-11	2.94859e-11	2.23947e-11	1.92362e-11	2.05623e-11	1.62178e-11	2.68285e-11	2.27436e-11	1.88046e-11	1.995e-11	2.34882e-11	2.17456e-11	1.78709e-11	1.57778e-11	1.82482e-11	2.18702e-11
17.82	1.95602e-11	2.29495e-11	2.14925e-11	2.14925e-11	2.71177e-11	2.1984e-11	2.56012e-11	2.32017e-11	2.22295e-11	3.31519e-11	2.00057e-11	1.55504e-11	3.06261e-11	2.44026e-11	2.94865e-11	2.23964e-11	1.92364e-11	2.05642e-11	1.62209e-11	2.68324e-11	2.27404e-11	1.88015e-11	1.99487e-11	2.34824e-11	2.17497e-11	1.78732e-11	1.57622e-11	1.82406e-11	2.18667e-11
17.84	1.95563e-11	2.29517e-11	2.14936e-11	2.14936e-11	2.71197e-11	2.19722e-11	2.55993e-11	2.31982e-11	2.223e-11	3.31537e-11	2.00003e-11	1.55494e-11	3.06284e-11	2.43998e-11	2.94835e-11	2.24004e-11	1.92347e-11	2.05649e-11	1.62228e-11	2.68404e-11	2.27524e-11	1.87996e-11	1.99479e-11	2.34867e-11	2.17497e-11	1.78657e-11	1.57611e-11	1.82407e-11	2.18609e-11
17.86	1.95571e-11	2.29513e-11	2.14878e-11	2.14878e-11	2.71235e-11	2.1975e-11	2.55974e-11	2.31977e-11	2.2235e-11	3.31575e-11	2.00031e-11	1.55523e-11	3.06339e-11	2.43932e-11	2.94824e-11	2.23984e-11	1.92299e-11	2.05655e-11	1.62163e-11	2.68222e-11	2.27451e-11	1.88016e-11	1.99468e-11	2.34852e-11	2.17504e-11	1.78656e-11	1.57652e-11	1.82448e-11	2.18617e-11
17.88	1.95562e-11	2.296e-11	2.14868e-11	2.14868e-11	2.71158e-11	2.19716e-11	2.55996e-11	2.32042e-11	2.22311e-11	3.31542e-11	1.99994e-11	1.55461e-11	3.06305e-11	2.43971e-11	2.94816e-11	2.2401e-11	1.92334e-11	2.05655e-11	1.62236e-11	2.6815e-11	2.27478e-11	1.88012e-11	1.99505e-11	2.34927e-11	2.17485e-11	1.78733e-11	1.57738e-11	1.82536e-11	2.18638e-11
17.9	1.95533e-11	2.29555e-11	2.14905e-11	2.14905e-11	2.71243e-11	2.19677e-11	2.56054e-11	2.32027e-11	2.2235e-11	3.31489e-11	2.00015e-11	1.55518e-11	3.06266e-11	2.43908e-11	2.94821e-11	2.24016e-11	1.92265e-11	2.0568e-11	1.62339e-11	2.68204e-11	2.27439e-11	1.87975e-11	1.99514e-11	2.34803e-11	2.1751e-11	1.78703e-11	1.57632e-11	1.8245e-11	2.18639e-11
17.92	1.95575e-11	2.29621e-11	2.14942e-11	2.14942e-11	2.71157e-11	2.19803e-11	2.56e-11	2.31972e-11	2.2235e-11	3.31541e-11	2.00016e-11	1.55449e-11	3.06303e-11	2.44029e-11	2.94849e-11	2.23999e-11	1.9235e-11	2.05718e-11	1.6226e-11	2.68526e-11	2.27507e-11	1.88029e-11	1.99804e-11	2.34798e-11	2.17529e-11	1.78678e-11	1.57738e-11	1.82474e-11	2.18674e-11
17.94	1.95538e-11	2.29602e-11	2.14861e-11	2.14861e-11	2.71213e-11	2.19775e-11	2.56032e-11	2.31946e-11	2.22374e-11	3.31537e-11	2.0005e-11	1.55468e-11	3.0629e-11	2.43987e-11	2.94833e-11	2.24003e-11	1.92302e-11	2.05701e-11	1.62254e-11	2.68674e-11	2.27449e-11	1.87986e-11	1.99233e-11	2.34836e-11	2.17514e-11	1.78693e-11	1.57665e-11	1.82454e-11	2.18641e-11
17.96	1.95561e-11	2.29487e-11	2.14974e-11	2.14974e-11	2.7119e-11	2.19823e-11	2.55971e-11	2.32046e-11	2.22377e-11	3.31558e-11	2.00025e-11	1.55508e-11	3.06298e-11	2.43947e-11	2.94893e-11	2.23969e-11	1.92357e-11	2.05752e-11	1.62214e-11	2.68657e-11	2.27508e-11	1.8803e-11	1.97189e-11	2.34824e-11	2.17476e-11	1.78702e-11	1.57698e-11	1.82464e-11	2.1862e-11
17.98	1.95567e-11	2.29574e-11	2.14897e-11	2.14897e-11	2.7122e-11	2.19732e-11	2.55968e-11	2.32038e-11	2.22372e-11	3.31448e-11	2.00005e-11	1.55489e-11	3.06302e-11	2.43937e-11	2.9482e-11	2.23948e-11	1.92391e-11	2.05666e-11	1.6215e-11	2.68512e-11	2.27459e-11	1.87989e-11	1.96322e-11	2.34854e-11	2.17498e-11	1.78595e-11	1.57739e-11	1.82467e-11	2.18659e-11
18	1.95586e-11	2.29586e-11	2.14913e-11	2.14913e-11	2.71157e-11	2.19726e-11	2.55985e-11	2.31993e-11	2.2232e-11	3.31522e-11	2.00007e-11	1.55504e-11	3.06315e-11	2.43982e-11	2.94806e-11	2.23991e-11	1.92374e-11	2.05731e-11	1.62176e-11	2.68316e-11	2.27389e-11	1.87995e-11	1.96022e-11	2.34821e-11	2.17488e-11	1.78611e-11	1.57696e-11	1.82407e-11	2.18606e-11
18.02	1.95495e-11	2.29546e-11	2.14925e-11	2.14925e-11	2.71182e-11	2.19825e-11	2.56038e-11	2.32003e-11	2.22346e-11	3.31516e-11	2.00022e-11	1.55536e-11	3.06277e-11	2.44006e-11	2.94866e-11	2.23978e-11	1.92388e-11	2.05651e-11	1.62205e-11	2.68046e-11	2.27449e-11	1.87948e-11	1.95935e-11	2.34862e-11	2.17481e-11	1.78577e-11	1.57602e-11	1.82439e-11	2.18688e-11
18.04	1.95535e-11	2.29554e-11	2.14883e-11	2.14883e-11	2.71185e-11	2.19762e-11	2.5605e-11	2.32035e-11	2.22342e-11	3.31473e-11	2.00015e-11	1.55515e-11	3.06314e-11	2.43948e-11	2.94827e-11	2.24033e-11	1.92401e-11	2.05594e-11	1.62121e-11	2.68192e-11	2.27469e-11	1.87919e-11	1.9577e-11	2.34837e-11	2.17452e-11	1.78571e-11	1.57796e-11	1.82394e-11	2.18631e-11
18.06	1.95508e-11	2.29564e-11	2.1489e-11	2.1489e-11	2.71167e-11	2.19764e-11	2.56057e-11	2.31999e-11	2.22371e-11	3.31487e-11	2.00024e-11	1.55454e-11	3.06316e-11	2.43962e-11	2.9487e-11	2.24003e-11	1.92347e-11	2.056e-11	1.62217e-11	2.68325e-11	2.27526e-11	1.88018e-11	1.95665e-11	2.34867e-11	2.17554e-11	1.78626e-11	1.5765e-11	1.82476e-11	2.18594e-11
18.08	1.95488e-11	2.29533e-11	2.14861e-11	2.14861e-11	2.71199e-11	2.1967e-11	2.56072e-11	2.31986e-11	2.22357e-11	3.31573e-11	2.00004e-11	1.55527e-11	3.06316e-11	2.43971e-11	2.9483e-11	2.24044e-11	1.92353e-11	2.05648e-11	1.62279e-11	2.68164e-11	2.27492e-11	1.87969e-11	1.95497e-11	2.34801e-11	2.17424e-11	1.786e-11	1.57728e-11	1.82419e-11	2.18614e-11
18.1	1.95506e-11	2.29638e-11	2.14933e-11	2.14933e-11	2.71247e-11	2.1967e-11	2.55976e-11	2.32035e-11	2.22379e-11	3.31543e-11	2.00025e-11	1.55483e-11	3.06306e-11	2.43931e-11	2.94858e-11	2.23996e-11	1.92307e-11	2.05595e-11	1.62299e-11	2.68391e-11	2.27504e-11	1.87992e-11	1.95455e-11	2.34803e-11	2.17503e-11	1.78673e-11	1.57697e-11	1.82554e-11	2.18575e-11
18.12	1.95486e-11	2.29622e-11	2.149e-11	2.149e-11	2.71184e-11	2.19765e-11	2.55991e-11	2.32031e-11	2.22341e-11	3.31521e-11	2.00007e-11	1.55502e-11	3.0627e-11	2.43991e-11	2.94847e-11	2.24031e-11	1.92329e-11	2.05685e-11	1.62179e-11	2.6821e-11	2.27498e-11	1.8798e-11	1.95293e-11	2.34776e-11	2.17571e-11	1.78654e-11	1.57671e-11	1.82438e-11	2.18591e-11
18.14	1.95568e-11	2.29582e-11	2.14925e-11	2.14925e-11	2.71155e-11	2.19698e-11	2.55971e-11	2.32051e-11	2.22356e-11	3.31584e-11	2.00013e-11	1.55473e-11	3.06322e-11	2.43989e-11	2.94806e-11	2.23964e-11	1.92368e-11	2.05685e-11	1.62132e-11	2.68145e-11	2.27437e-11	1.87995e-11	1.95222e-11	2.34838e-11	2.17543e-11	1.78583e-11	1.57719e-11	1.82492e-11	2.18577e-11
18.16	1.9555e-11	2.29573e-11	2.14897e-11	2.14897e-11	2.71185e-11	2.19778e-11	2.56058e-11	2.31987e-11	2.22347e-11	3.31523e-11	2.00007e-11	1.55489e-11	3.06348e-11	2.43951e-11	2.94777e-11	2.23959e-11	1.92394e-11	2.05713e-11	1.62255e-11	2.68585e-11	2.27535e-11	1.87964e-11	1.95137e-11	2.34838e-11	2.17536e-11	1.7868e-11	1.57719e-11	1.82457e-11	2.18581e-11
18.18	1.95486e-11	2.29573e-11	2.14866e-11	2.14866e-11	2.71174e-11	2.19807e-11	2.56021e-11	2.32036e-11	2.22351e-11	3.31578e-11	2.00048e-11	1.55508e-11	3.06299e-11	2.43997e-11	2.94794e-11	2.24003e-11	1.92351e-11	2.05663e-11	1.62228e-11	2.68464e-11	2.27441e-11	1.87909e-11	1.95016e-11	2.34776e-11	2.17585e-11	1.78696e-11	1.57598e-11	1.82532e-11	2.18637e-11
18.2	1.95518e-11	2.2953e-11	2.14867e-11	2.14867e-11	2.7118e-11	2.19695e-11	2.56044e-11	2.31979e-11	2.22321e-11	3.31542e-11	2.00025e-11	1.55483e-11	3.06296e-11	2.43934e-11	2.94879e-11	2.24044e-11	1.9237e-11	2.05717e-11	1.62242e-11	2.68163e-11	2.27463e-11	1.87976e-11	1.94919e-11	2.34819e-11	2.17484e-11	1.78568e-11	1.57598e-11	1.82458e-11	2.1864e-11
18.22	1.95511e-11	2.29594e-11	2.14852e-11	2.14852e-11	2.71135e-11	2.19743e-11	2.55966e-11	2.32005e-11	2.22291e-11	3.31528e-11	2.00036e-11	1.55498e-11	3.0627e-11	2.43992e-11	2.94865e-11	2.24021e-11	1.92347e-11	2.05655e-11	1.62225e-11	2.68155e-11	2.27521e-11	1.87989e-11	1.94805e-11	2.34855e-11	2.1755e-11	1.78608e-11	1.5773e-11	1.82476e-11	2.18533e-11
18.24	1.95529e-11	2.29585e-11	2.14895e-11	2.14895e-11	2.71195e-11	2.19738e-11	2.5595e-11	2.32024e-11	2.22262e-11	3.31561e-11	2.00077e-11	1.55547e-11	3.06328e-11	2.43923e-11	2.94867e-11	2.24018e-11	1.92328e-11	2.0573e-11	1.62259e-11	2.68193e-11	2.27463e-11	1.8795e-11	1.94747e-11	2.34846e-11	2.17533e-11	1.78561e-11	1.57741e-11	1.8247e-11	2.18509e-11
18.26	1.95463e-11	2.29563e-11	2.14952e-11	2.14952e-11	2.71135e-11	2.1975e-11	2.56002e-11	2.32002e-11	2.22275e-11	3.31534e-11	2.00009e-11	1.55513e-11	3.06342e-11	2.43988e-11	2.94809e-11	2.23967e-11	1.92336e-11	2.05839e-11	1.62221e-11	2.68281e-11	2.27412e-11	1.87932e-11	1.94668e-11	2.34868e-11	2.17496e-11	1.78567e-11	1.576e-11	1.82424e-11	2.18647e-11
18.28	1.95519e-11	2.29583e-11	2.14933e-11	2.14933e-11	2.71208e-11	2.1973e-11	2.56016e-11	2.31976e-11	2.223e-11	3.31605e-11	2.0003e-11	1.55512e-11	3.06268e-11	2.4399e-11	2.94852e-11	2.24003e-11	1.92326e-11	2.05751e-11	1.62292e-11	2.68286e-11	2.27529e-11	1.8787e-11	1.94566e-11	2.34842e-11	2.17499e-11	1.7833e-11	1.57713e-11	1.82399e-11	2.18621e-11
18.3	1.95535e-11	2.29544e-11	2.14876e-11	2.14876e-11	2.7118e-11	2.19729e-11	2.55959e-11	2.31955e-11	2.22308e-11	3.31537e-11	2.00007e-11	1.55536e-11	3.0628e-11	2.43972e-11	2.94863e-11	2.24006e-11	1.92326e-11	2.0574e-11	1.6221e-11	2.68306e-11	2.27491e-11	1.87951e-11	1.94505e-11	2.34778e-11	2.17473e-11	1.78601e-11	1.57708e-11	1.82435e-11	2.18582e-11
18.32	1.95564e-11	2.29498e-11	2.14878e-11	2.14878e-11	2.71141e-11	2.19729e-11	2.56014e-11	2.31969e-11	2.22279e-11	3.31568e-11	2.00073e-11	1.55519e-11	3.06349e-11	2.4397e-11	2.94817e-11	2.23969e-11	1.92375e-11	2.05777e-11	1.62191e-11	2.68206e-11	2.27424e-11	1.87945e-11	1.94461e-11	2.34789e-11	2.17546e-11	1.785e-11	1.57645e-11	1.8242e-11	2.18582e-11
18.34	1.95473e-11	2.29538e-11	2.14928e-11	2.14928e-11	2.71169e-11	2.19709e-11	2.5597e-11	2.31968e-11	2.22365e-11	3.316e-11	2.00075e-11	1.55464e-11	3.06246e-11	2.4394e-11	2.94837e-11	2.23994e-11	1.92363e-11	2.05741e-11	1.62226e-11	2.68262e-11	2.27444e-11	1.87928e-11	1.94406e-11	2.34846e-11	2.17505e-11	1.78536e-11	1.576e-11	1.82467e-11	2.1853e-11
18.36	1.95513e-11	2.29569e-11	2.1492e-11	2.1492e-11	2.71144e-11	2.19776e-11	2.56008e-11	2.31942e-11	2.22341e-11	3.31562e-11	2.00101e-11	1.55533e-11	3.06328e-11	2.43959e-11	2.94827e-11	2.24053e-11	1.92337e-11	2.05763e-11	1.6229e-11	2.68004e-11	2.275e-11	1.87967e-11	1.94365e-11	2.34863e-11	2.17468e-11	1.78508e-11	1.57753e-11	1.82449e-11	2.18581e-11
18.38	1.95458e-11	2.2957e-11	2.14965e-11	2.14965e-11	2.71169e-11	2.19736e-11	2.56012e-11	2.32008e-11	2.22285e-11	3.31534e-11	2.00095e-11	1.55454e-11	3.0628e-11	2.44006e-11	2.94885e-11	2.24028e-11	1.9236e-11	2.0572e-11	1.62172e-11	2.68209e-11	2.27478e-11	1.87906e-11	1.94294e-11	2.34792e-11	2.17523e-11	1.78516e-11	1.57747e-11	1.82433e-11	2.18639e-11
18.4	1.95497e-11	2.29495e-11	2.149e-11	2.149e-11	2.71191e-11	2.19804e-11	2.56031e-11	2.31954e-11	2.2234e-11	3.31533e-11	2.00074e-11	1.55501e-11	3.06358e-11	2.43921e-11	2.94838e-11	2.24027e-11	1.92354e-11	2.05776e-11	1.62123e-11	2.68115e-11	2.27427e-11	1.87897e-11	1.94274e-11	2.34799e-11	2.17469e-11	1.7862e-11	1.57716e-11	1.8241e-11	2.18667e-11
18.42	1.95474e-11	2.29631e-11	2.14943e-11	2.14943e-11	2.71183e-11	2.19766e-11	2.55956e-11	2.31974e-11	2.22314e-11	3.3155e-11	2.00022e-11	1.55499e-11	3.06293e-11	2.43963e-11	2.9485e-11	2.23979e-11	1.92359e-11	2.05829e-11	1.62167e-11	2.68123e-11	2.27495e-11	1.87922e-11	1.94202e-11	2.34896e-11	2.17523e-11	1.78625e-11	1.57571e-11	1.82445e-11	2.18581e-11
18.44	1.95472e-11	2.29497e-11	2.14917e-11	2.14917e-11	2.71132e-11	2.19759e-11	2.56009e-11	2.31993e-11	2.22336e-11	3.31541e-11	2.00011e-11	1.55505e-11	3.06289e-11	2.43986e-11	2.94819e-11	2.24019e-11	1.92373e-11	2.05801e-11	1.62084e-11	2.68394e-11	2.27462e-11	1.87929e-11	1.94196e-11	2.34805e-11	2.17552e-11	1.7854e-11	1.57659e-11	1.82484e-11	2.18543e-11
18.46	1.95438e-11	2.29528e-11	2.14879e-11	2.14879e-11	2.7116e-11	2.19651e-11	2.56093e-11	2.31982e-11	2.22251e-11	3.31503e-11	1.99996e-11	1.55453e-11	3.06281e-11	2.4394e-11	2.94848e-11	2.24037e-11	1.92331e-11	2.05763e-11	1.62038e-11	2.68399e-11	2.27484e-11	1.87963e-11	1.94194e-11	2.34853e-11	2.17554e-11	1.78603e-11	1.57559e-11	1.8241e-11	2.18607e-11
18.48	1.95505e-11	2.29504e-11	2.14883e-11	2.14883e-11	2.71174e-11	2.19761e-11	2.56031e-11	2.32039e-11	2.22303e-11	3.31545e-11	2.00041e-11	1.55505e-11	3.06324e-11	2.4398e-11	2.94814e-11	2.24038e-11	1.92382e-11	2.05744e-11	1.62011e-11	2.68418e-11	2.27437e-11	1.87978e-11	1.94121e-11	2.34873e-11	2.17527e-11	1.78705e-11	1.57637e-11	1.82462e-11	2.18638e-11
18.5	1.95524e-11	2.29514e-11	2.14884e-11	2.14884e-11	2.71161e-11	2.19702e-11	2.56037e-11	2.31998e-11	2.2228e-11	3.31577e-11	2.00044e-11	1.55502e-11	3.06292e-11	2.43965e-11	2.94854e-11	2.24071e-11	1.92352e-11	2.05783e-11	1.62115e-11	2.6815e-11	2.27459e-11	1.87961e-11	1.94065e-11	2.34811e-11	2.17476e-11	1.78651e-11	1.57668e-11	1.82445e-11	2.18633e-11
18.52	1.95554e-11	2.2953e-11	2.14888e-11	2.14888e-11	2.71181e-11	2.19792e-11	2.55975e-11	2.31992e-11	2.22296e-11	3.31554e-11	2.00054e-11	1.55481e-11	3.06274e-11	2.43974e-11	2.94865e-11	2.24003e-11	1.92322e-11	2.05815e-11	1.62066e-11	2.68282e-11	2.27491e-11	1.87889e-11	1.94079e-11	2.3478e-11	2.17467e-11	1.78637e-11	1.57727e-11	1.82421e-11	2.18571e-11
18.54	1.95506e-11	2.2957e-11	2.14896e-11	2.14896e-11	2.7119e-11	2.1968e-11	2.56031e-11	2.31981e-11	2.22335e-11	3.31567e-11	2.00092e-11	1.55493e-11	3.0627e-11	2.43988e-11	2.94815e-11	2.24005e-11	1.92368e-11	2.05777e-11	1.6213e-11	2.68192e-11	2.2751e-11	1.87939e-11	1.94015e-11	2.34845e-11	2.1757e-11	1.78577e-11	1.57638e-11	1.82466e-11	2.18566e-11
18.56	1.95464e-11	2.29547e-11	2.1491e-11	2.1491e-11	2.71138e-11	2.19727e-11	2.56064e-11	2.31993e-11	2.22323e-11	3.31568e-11	2.00047e-11	1.55504e-11	3.06285e-11	2.43932e-11	2.94864e-11	2.23943e-11	1.92367e-11	2.05826e-11	1.62171e-11	2.6835e-11	2.27476e-11	1.87953e-11	1.94023e-11	2.34885e-11	2.1754e-11	1.7847e-11	1.57674e-11	1.82505e-11	2.18529e-11
18.58	1.95485e-11	2.29526e-11	2.14906e-11	2.14906e-11	2.71144e-11	2.19752e-11	2.56046e-11	2.32004e-11	2.22357e-11	3.31555e-11	2.00137e-11	1.55455e-11	3.06265e-11	2.43966e-11	2.94828e-11	2.24015e-11	1.92363e-11	2.05816e-11	1.62245e-11	2.68379e-11	2.27517e-11	1.87903e-11	1.9394e-11	2.34815e-11	2.17503e-11	1.78473e-11	1.57597e-11	1.82461e-11	2.18491e-11
18.6	1.95484e-11	2.29562e-11	2.14927e-11	2.14927e-11	2.7117e-11	2.197e-11	2.56033e-11	2.31995e-11	2.22302e-11	3.31543e-11	2.00053e-11	1.55466e-11	3.06317e-11	2.4397e-11	2.94829e-11	2.23959e-11	1.92395e-11	2.05799e-11	1.62094e-11	2.68079e-11	2.27443e-11	1.87932e-11	1.93908e-11	2.34791e-11	2.17512e-11	1.78499e-11	1.57701e-11	1.8246e-11	2.18619e-11
18.62	1.95441e-11	2.29535e-11	2.14881e-11	2.14881e-11	2.71168e-11	2.19663e-11	2.56006e-11	2.31954e-11	2.22371e-11	3.3155e-11	2.00012e-11	1.55466e-11	3.06308e-11	2.4394e-11	2.94805e-11	2.24026e-11	1.924e-11	2.05782e-11	1.62117e-11	2.68373e-11	2.275e-11	1.87894e-11	1.93889e-11	2.34827e-11	2.17575e-11	1.78479e-11	1.57685e-11	1.82475e-11	2.18591e-11
18.64	1.95544e-11	2.29552e-11	2.14918e-11	2.14918e-11	2.711e-11	2.19728e-11	2.55949e-11	2.31992e-11	2.22309e-11	3.31526e-11	2.00015e-11	1.55481e-11	3.06327e-11	2.43998e-11	2.9486e-11	2.24021e-11	1.92396e-11	2.05763e-11	1.62126e-11	2.682e-11	2.27463e-11	1.87876e-11	1.93895e-11	2.34749e-11	2.17519e-11	1.78469e-11	1.5771e-11	1.82412e-11	2.18482e-11
18.66	1.95446e-11	2.29578e-11	2.14906e-11	2.14906e-11	2.71117e-11	2.19768e-11	2.56026e-11	2.31995e-11	2.22336e-11	3.31534e-11	2.00088e-11	1.55466e-11	3.06254e-11	2.43989e-11	2.94852e-11	2.24042e-11	1.92401e-11	2.05814e-11	1.62072e-11	2.68361e-11	2.27503e-11	1.87897e-11	1.93846e-11	2.34793e-11	2.17571e-11	1.78422e-11	1.57638e-11	1.82429e-11	2.18504e-11
18.68	1.95499e-11	2.29555e-11	2.1497e-11	2.1497e-11	2.71131e-11	2.19747e-11	2.55962e-11	2.31987e-11	2.22289e-11	3.3151e-11	2.0006e-11	1.55493e-11	3.0625e-11	2.43975e-11	2.94807e-11	2.24018e-11	1.92399e-11	2.05818e-11	1.62067e-11	2.68399e-11	2.27451e-11	1.87898e-11	1.93845e-11	2.34767e-11	2.17543e-11	1.78628e-11	1.57654e-11	1.82486e-11	2.18586e-11
18.7	1.95509e-11	2.29557e-11	2.14893e-11	2.14893e-11	2.71146e-11	2.1975e-11	2.55981e-11	2.31979e-11	2.22338e-11	3.31555e-11	2.00058e-11	1.55477e-11	3.06205e-11	2.43985e-11	2.94865e-11	2.24e-11	1.92349e-11	2.05828e-11	1.62236e-11	2.68633e-11	2.27515e-11	1.87932e-11	1.93846e-11	2.34808e-11	2.17461e-11	1.78616e-11	1.57615e-11	1.82482e-11	2.18621e-11
18.72	1.95484e-11	2.29546e-11	2.14919e-11	2.14919e-11	2.71191e-11	2.19702e-11	2.5604e-11	2.31976e-11	2.22333e-11	3.31494e-11	2.00052e-11	1.55486e-11	3.06318e-11	2.43955e-11	2.94848e-11	2.2401e-11	1.92403e-11	2.05812e-11	1.62134e-11	2.68307e-11	2.27453e-11	1.87899e-11	1.93769e-11	2.34842e-11	2.1755e-11	1.78569e-11	1.57702e-11	1.82483e-11	2.18521e-11
18.74	1.95466e-11	2.295e-11	2.14973e-11	2.14973e-11	2.71174e-11	2.19755e-11	2.56036e-11	2.31995e-11	2.22314e-11	3.31581e-11	2.00041e-11	1.55494e-11	3.06315e-11	2.44015e-11	2.94826e-11	2.23982e-11	1.92398e-11	2.05862e-11	1.62067e-11	2.68382e-11	2.27496e-11	1.87916e-11	1.93716e-11	2.34837e-11	2.17581e-11	1.78468e-11	1.57637e-11	1.82461e-11	2.18528e-11
18.76	1.95466e-11	2.29555e-11	2.14916e-11	2.14916e-11	2.71158e-11	2.19684e-11	2.56048e-11	2.31978e-11	2.22362e-11	3.31501e-11	1.99989e-11	1.55471e-11	3.063e-11	2.43941e-11	2.94855e-11	2.23953e-11	1.92378e-11	2.05833e-11	1.62174e-11	2.68316e-11	2.27416e-11	1.87915e-11	1.93735e-11	2.34835e-11	2.17559e-11	1.78401e-11	1.57751e-11	1.82489e-11	2.18501e-11
18.78	1.95394e-11	2.29581e-11	2.14906e-11	2.14906e-11	2.71145e-11	2.19708e-11	2.56101e-11	2.31947e-11	2.22415e-11	3.31551e-11	2.00062e-11	1.55492e-11	3.06271e-11	2.43959e-11	2.94871e-11	2.24016e-11	1.92376e-11	2.0573e-11	1.6223e-11	2.68385e-11	2.27502e-11	1.87839e-11	1.93661e-11	2.34831e-11	2.17548e-11	1.78539e-11	1.5757e-11	1.82427e-11	2.1851e-11
18.8	1.95505e-11	2.29527e-11	2.14969e-11	2.14969e-11	2.71166e-11	2.19743e-11	2.5604e-11	2.32012e-11	2.22394e-11	3.31568e-11	2.00058e-11	1.55522e-11	3.0628e-11	2.43937e-11	2.94835e-11	2.23988e-11	1.92363e-11	2.05812e-11	1.62115e-11	2.68572e-11	2.27525e-11	1.87899e-11	1.93613e-11	2.34782e-11	2.17463e-11	1.78648e-11	1.57723e-11	1.82457e-11	2.18563e-11
18.82	1.95489e-11	2.29526e-11	2.14892e-11	2.14892e-11	2.71125e-11	2.19764e-11	2.56078e-11	2.31962e-11	2.22381e-11	3.31568e-11	2.00016e-11	1.55489e-11	3.06285e-11	2.43954e-11	2.94856e-11	2.24014e-11	1.9241e-11	2.05803e-11	1.62245e-11	2.68145e-11	2.2744e-11	1.87866e-11	1.93604e-11	2.34772e-11	2.17467e-11	1.78584e-11	1.57743e-11	1.82486e-11	2.18591e-11
18.84	1.95483e-11	2.29539e-11	2.14925e-11	2.14925e-11	2.71113e-11	2.19697e-11	2.56046e-11	2.31963e-11	2.22331e-11	3.3151e-11	2.00066e-11	1.5553e-11	3.06326e-11	2.43948e-11	2.94825e-11	2.24001e-11	1.92419e-11	2.05774e-11	1.62144e-11	2.68532e-11	2.27524e-11	1.87924e-11	1.93583e-11	2.34824e-11	2.17492e-11	1.78614e-11	1.57621e-11	1.82415e-11	2.1861e-11
18.86	1.95464e-11	2.2958e-11	2.1492e-11	2.1492e-11	2.71178e-11	2.19825e-11	2.56062e-11	2.32017e-11	2.22383e-11	3.3157e-11	2.0006e-11	1.55453e-11	3.06295e-11	2.43954e-11	2.94858e-11	2.23986e-11	1.92392e-11	2.05749e-11	1.6218e-11	2.68476e-11	2.2746e-11	1.87891e-11	1.9358e-11	2.3475e-11	2.17535e-11	1.78598e-11	1.57733e-11	1.82429e-11	2.18604e-11
18.88	1.95468e-11	2.29573e-11	2.14924e-11	2.14924e-11	2.7112e-11	2.19755e-11	2.56086e-11	2.31976e-11	2.22425e-11	3.31564e-11	2.00072e-11	1.55508e-11	3.06314e-11	2.43945e-11	2.94835e-11	2.23992e-11	1.9239e-11	2.05732e-11	1.62168e-11	2.68697e-11	2.27424e-11	1.87877e-11	1.93582e-11	2.34839e-11	2.17554e-11	1.78574e-11	1.57723e-11	1.82457e-11	2.18613e-11
18.9	1.95507e-11	2.29524e-11	2.14956e-11	2.14956e-11	2.71135e-11	2.19729e-11	2.56043e-11	2.31973e-11	2.22417e-11	3.31564e-11	2.00031e-11	1.55471e-11	3.06323e-11	2.44001e-11	2.9486e-11	2.24006e-11	1.92412e-11	2.05674e-11	1.62192e-11	2.68782e-11	2.27493e-11	1.87881e-11	1.93543e-11	2.34799e-11	2.1754e-11	1.78665e-11	1.57689e-11	1.82455e-11	2.18574e-11
18.92	1.95487e-11	2.29632e-11	2.14862e-11	2.14862e-11	2.71156e-11	2.19748e-11	2.56024e-11	2.32025e-11	2.22443e-11	3.31565e-11	2.00063e-11	1.55458e-11	3.06293e-11	2.44106e-11	2.949e-11	2.24064e-11	1.92382e-11	2.05809e-11	1.62173e-11	2.68417e-11	2.27553e-11	1.87908e-11	1.93528e-11	2.3478e-11	2.17438e-11	1.78621e-11	1.57574e-11	1.82502e-11	2.186e-11
18.94	1.95527e-11	2.29553e-11	2.14914e-11	2.14914e-11	2.71122e-11	2.19847e-11	2.5606e-11	2.31995e-11	2.22406e-11	3.31589e-11	2.00075e-11	1.55469e-11	3.06346e-11	2.4401e-11	2.94892e-11	2.24022e-11	1.92375e-11	2.05732e-11	1.62179e-11	2.68256e-11	2.27435e-11	1.87853e-11	1.93523e-11	2.34837e-11	2.17549e-11	1.78612e-11	1.57541e-11	1.82481e-11	2.18566e-11
18.96	1.95411e-11	2.29581e-11	2.1491e-11	2.1491e-11	2.71146e-11	2.19783e-11	2.56021e-11	2.31952e-11	2.22343e-11	3.31599e-11	2.00022e-11	1.55477e-11	3.06308e-11	2.44001e-11	2.9493e-11	2.24042e-11	1.92378e-11	2.05744e-11	1.62324e-11	2.68494e-11	2.27466e-11	1.87896e-11	1.93499e-11	2.34806e-11	2.17522e-11	1.78602e-11	1.5774e-11	1.82478e-11	2.18578e-11
18.98	1.95484e-11	2.29586e-11	2.14904e-11	2.14904e-11	2.71123e-11	2.19757e-11	2.56035e-11	2.32006e-11	2.22392e-11	3.3155e-11	2.00042e-11	1.55446e-11	3.06349e-11	2.43984e-11	2.94868e-11	2.23994e-11	1.92397e-11	2.05733e-11	1.62014e-11	2.68645e-11	2.27458e-11	1.87856e-11	1.93448e-11	2.34803e-11	2.17528e-11	1.78563e-11	1.5766e-11	1.82515e-11	2.18615e-11
19	1.95441e-11	2.29551e-11	2.1495e-11	2.1495e-11	2.71116e-11	2.19719e-11	2.56022e-11	2.31947e-11	2.22403e-11	3.31529e-11	2.00035e-11	1.55482e-11	3.06343e-11	2.43992e-11	2.94861e-11	2.24051e-11	1.92355e-11	2.05711e-11	1.61998e-11	2.68352e-11	2.27503e-11	1.87895e-11	1.93433e-11	2.3483e-11	2.17493e-11	1.78637e-11	1.57731e-11	1.82443e-11	2.18539e-11
19.02	1.95429e-11	2.29545e-11	2.14941e-11	2.14941e-11	2.71179e-11	2.19759e-11	2.56037e-11	2.32016e-11	2.22431e-11	3.31606e-11	1.99984e-11	1.55484e-11	3.06326e-11	2.43969e-11	2.94808e-11	2.23919e-11	1.92323e-11	2.05734e-11	1.62013e-11	2.68254e-11	2.27461e-11	1.87921e-11	1.93357e-11	2.34779e-11	2.17514e-11	1.78495e-11	1.57721e-11	1.82449e-11	2.18627e-11
19.04	1.95508e-11	2.29535e-11	2.14899e-11	2.14899e-11	2.71147e-11	2.19797e-11	2.56052e-11	2.31978e-11	2.22434e-11	3.31603e-11	2.00032e-11	1.55462e-11	3.06293e-11	2.43954e-11	2.94875e-11	2.24035e-11	1.92369e-11	2.05664e-11	1.62115e-11	2.68268e-11	2.27422e-11	1.87851e-11	1.93389e-11	2.34729e-11	2.17445e-11	1.78395e-11	1.57709e-11	1.82486e-11	2.18536e-11
19.06	1.9546e-11	2.29514e-11	2.14888e-11	2.14888e-11	2.71147e-11	2.19757e-11	2.56037e-11	2.32e-11	2.22418e-11	3.31584e-11	2.00046e-11	1.55475e-11	3.06287e-11	2.43955e-11	2.94857e-11	2.23987e-11	1.92379e-11	2.05816e-11	1.62072e-11	2.68489e-11	2.27442e-11	1.87871e-11	1.93313e-11	2.34795e-11	2.17515e-11	1.78516e-11	1.57612e-11	1.82512e-11	2.18455e-11
19.08	1.9547e-11	2.29595e-11	2.14937e-11	2.14937e-11	2.71119e-11	2.19775e-11	2.56073e-11	2.31931e-11	2.22454e-11	3.31552e-11	2.00037e-11	1.55433e-11	3.06283e-11	2.43959e-11	2.94878e-11	2.24027e-11	1.92317e-11	2.05688e-11	1.61999e-11	2.68316e-11	2.27468e-11	1.87828e-11	1.93267e-11	2.34817e-11	2.17511e-11	1.78514e-11	1.57848e-11	1.82473e-11	2.18556e-11
19.1	1.95474e-11	2.29574e-11	2.14939e-11	2.14939e-11	2.71115e-11	2.19709e-11	2.56024e-11	2.31968e-11	2.22432e-11	3.31544e-11	2.00051e-11	1.55464e-11	3.06316e-11	2.43991e-11	2.94855e-11	2.23965e-11	1.92356e-11	2.05773e-11	1.62068e-11	2.68185e-11	2.27434e-11	1.87846e-11	1.93344e-11	2.34796e-11	2.17536e-11	1.78411e-11	1.5777e-11	1.82491e-11	2.18568e-11
19.12	1.95405e-11	2.29537e-11	2.14926e-11	2.14926e-11	2.71094e-11	2.19811e-11	2.55947e-11	2.31976e-11	2.22471e-11	3.3158e-11	2.00052e-11	1.55413e-11	3.06323e-11	2.43984e-11	2.94874e-11	2.24018e-11	1.92409e-11	2.05736e-11	1.62094e-11	2.68532e-11	2.27458e-11	1.87833e-11	1.93334e-11	2.34811e-11	2.17567e-11	1.7845e-11	1.57748e-11	1.82392e-11	2.18534e-11
19.14	1.95488e-11	2.29583e-11	2.14874e-11	2.14874e-11	2.71117e-11	2.19822e-11	2.56053e-11	2.31965e-11	2.22435e-11	3.31534e-11	2.00087e-11	1.55456e-11	3.06294e-11	2.43976e-11	2.94912e-11	2.24016e-11	1.92392e-11	2.05747e-11	1.62034e-11	2.68127e-11	2.27387e-11	1.87856e-11	1.9329e-11	2.3482e-11	2.17519e-11	1.78599e-11	1.57659e-11	1.82527e-11	2.18532e-11
19.16	1.95482e-11	2.29525e-11	2.14927e-11	2.14927e-11	2.71145e-11	2.19853e-11	2.55986e-11	2.31952e-11	2.2247e-11	3.31586e-11	1.99998e-11	1.55486e-11	3.06334e-11	2.43974e-11	2.94837e-11	2.24007e-11	1.92407e-11	2.05733e-11	1.62213e-11	2.68459e-11	2.27479e-11	1.8788e-11	1.9334e-11	2.34825e-11	2.175e-11	1.78374e-11	1.57756e-11	1.8248e-11	2.18577e-11
19.18	1.9542e-11	2.29568e-11	2.14843e-11	2.14843e-11	2.71099e-11	2.19747e-11	2.55999e-11	2.31995e-11	2.22458e-11	3.31515e-11	2.00054e-11	1.55469e-11	3.0633e-11	2.43909e-11	2.94867e-11	2.24012e-11	1.92405e-11	2.05719e-11	1.6212e-11	2.68273e-11	2.27433e-11	1.87841e-11	1.93319e-11	2.34767e-11	2.17517e-11	1.78592e-11	1.57627e-11	1.82394e-11	2.18577e-11
19.2	1.95446e-11	2.29614e-11	2.14947e-11	2.14947e-11	2.71149e-11	2.1979e-11	2.56023e-11	2.31983e-11	2.22445e-11	3.3156e-11	2.00074e-11	1.55423e-11	3.0632e-11	2.43976e-11	2.94911e-11	2.2404e-11	1.92417e-11	2.05715e-11	1.62141e-11	2.6801e-11	2.27441e-11	1.87885e-11	1.93279e-11	2.34799e-11	2.17476e-11	1.78424e-11	1.57677e-11	1.82451e-11	2.18638e-11
19.22	1.95447e-11	2.29564e-11	2.14937e-11	2.14937e-11	2.71144e-11	2.19759e-11	2.56044e-11	2.31987e-11	2.2251e-11	3.31569e-11	2.00041e-11	1.55472e-11	3.06312e-11	2.43909e-11	2.9487e-11	2.23995e-11	1.92332e-11	2.05759e-11	1.62076e-11	2.68233e-11	2.27483e-11	1.87835e-11	1.93287e-11	2.34758e-11	2.1752e-11	1.78458e-11	1.57747e-11	1.82433e-11	2.18603e-11
19.24	1.95448e-11	2.29452e-11	2.14934e-11	2.14934e-11	2.71159e-11	2.19836e-11	2.56059e-11	2.32049e-11	2.22531e-11	3.31614e-11	2.00083e-11	1.55446e-11	3.0628e-11	2.43928e-11	2.94907e-11	2.23919e-11	1.9239e-11	2.05715e-11	1.62157e-11	2.68182e-11	2.27377e-11	1.87803e-11	1.93276e-11	2.34811e-11	2.17465e-11	1.78598e-11	1.57745e-11	1.82455e-11	2.18583e-11
19.26	1.9544e-11	2.29578e-11	2.14909e-11	2.14909e-11	2.71119e-11	2.19821e-11	2.56004e-11	2.31936e-11	2.22453e-11	3.31619e-11	2.00057e-11	1.55417e-11	3.06341e-11	2.43962e-11	2.94829e-11	2.23934e-11	1.92337e-11	2.05792e-11	1.62179e-11	2.68519e-11	2.27441e-11	1.87862e-11	1.9328e-11	2.34795e-11	2.17516e-11	1.78451e-11	1.57685e-11	1.82518e-11	2.18533e-11
19.28	1.95393e-11	2.2951e-11	2.14915e-11	2.14915e-11	2.7113e-11	2.19696e-11	2.55973e-11	2.31995e-11	2.22513e-11	3.31569e-11	2.00002e-11	1.5546e-11	3.06319e-11	2.43914e-11	2.94835e-11	2.24012e-11	1.92371e-11	2.05752e-11	1.62152e-11	2.6814e-11	2.27484e-11	1.87859e-11	1.93167e-11	2.34784e-11	2.17528e-11	1.7854e-11	1.57732e-11	1.82431e-11	2.18619e-11
19.3	1.95477e-11	2.29507e-11	2.14905e-11	2.14905e-11	2.71097e-11	2.19786e-11	2.5597e-11	2.31997e-11	2.22478e-11	3.31594e-11	2.00027e-11	1.55481e-11	3.06334e-11	2.43989e-11	2.94825e-11	2.24017e-11	1.92358e-11	2.05719e-11	1.62118e-11	2.68232e-11	2.27502e-11	1.8781e-11	1.93244e-11	2.34792e-11	2.17451e-11	1.78463e-11	1.57651e-11	1.82506e-11	2.18674e-11
19.32	1.95451e-11	2.29541e-11	2.14913e-11	2.14913e-11	2.71125e-11	2.19911e-11	2.56002e-11	2.32057e-11	2.22504e-11	3.3154e-11	2.00011e-11	1.55458e-11	3.06293e-11	2.43937e-11	2.9492e-11	2.23955e-11	1.9238e-11	2.05759e-11	1.62124e-11	2.68112e-11	2.27482e-11	1.87856e-11	1.93281e-11	2.34769e-11	2.17481e-11	1.78388e-11	1.57761e-11	1.82438e-11	2.18604e-11
19.34	1.95439e-11	2.29551e-11	2.14899e-11	2.14899e-11	2.71116e-11	2.19818e-11	2.56036e-11	2.3196e-11	2.22519e-11	3.31553e-11	2.00043e-11	1.5551e-11	3.06312e-11	2.43911e-11	2.94826e-11	2.23999e-11	1.92434e-11	2.05668e-11	1.62048e-11	2.68153e-11	2.27436e-11	1.87891e-11	1.93267e-11	2.34737e-11	2.17511e-11	1.78583e-11	1.5767e-11	1.82543e-11	2.18651e-11
19.36	1.95459e-11	2.2956e-11	2.14897e-11	2.14897e-11	2.71058e-11	2.19724e-11	2.56021e-11	2.31972e-11	2.22512e-11	3.31515e-11	2.00008e-11	1.55514e-11	3.0631e-11	2.43904e-11	2.94848e-11	2.23971e-11	1.92439e-11	2.05765e-11	1.62023e-11	2.68583e-11	2.27485e-11	1.87822e-11	1.93247e-11	2.34793e-11	2.1752e-11	1.78553e-11	1.57661e-11	1.82452e-11	2.186e-11
19.38	1.95462e-11	2.29526e-11	2.14891e-11	2.14891e-11	2.71127e-11	2.19821e-11	2.56041e-11	2.31992e-11	2.22495e-11	3.31546e-11	2.00048e-11	1.55489e-11	3.06323e-11	2.43925e-11	2.94858e-11	2.23967e-11	1.92422e-11	2.05688e-11	1.61957e-11	2.68324e-11	2.27467e-11	1.87822e-11	1.93138e-11	2.34851e-11	2.17557e-11	1.78443e-11	1.57676e-11	1.82516e-11	2.18578e-11
19.4	1.954e-11	2.29542e-11	2.14924e-11	2.14924e-11	2.71116e-11	2.19838e-11	2.56017e-11	2.3195e-11	2.2248e-11	3.31589e-11	2.00058e-11	1.55456e-11	3.06349e-11	2.43952e-11	2.949e-11	2.23994e-11	1.92397e-11	2.05724e-11	1.62137e-11	2.68302e-11	2.27432e-11	1.87827e-11	1.93128e-11	2.34769e-11	2.17525e-11	1.78469e-11	1.57719e-11	1.82417e-11	2.18563e-11
19.42	1.95396e-11	2.29519e-11	2.14941e-11	2.14941e-11	2.71044e-11	2.199e-11	2.5603e-11	2.31978e-11	2.22526e-11	3.31593e-11	2.0005e-11	1.55436e-11	3.06307e-11	2.43882e-11	2.94862e-11	2.24025e-11	1.92345e-11	2.05705e-11	1.62114e-11	2.684e-11	2.27487e-11	1.87777e-11	1.93156e-11	2.34827e-11	2.1749e-11	1.78552e-11	1.57608e-11	1.82451e-11	2.18611e-11
19.44	1.95466e-11	2.29548e-11	2.14947e-11	2.14947e-11	2.71158e-11	2.19798e-11	2.56048e-11	2.31972e-11	2.22494e-11	3.31579e-11	2.00045e-11	1.55528e-11	3.06289e-11	2.43931e-11	2.94826e-11	2.2399e-11	1.92404e-11	2.05705e-11	1.6211e-11	2.68124e-11	2.27482e-11	1.87797e-11	1.93139e-11	2.34744e-11	2.1751e-11	1.78532e-11	1.57775e-11	1.82495e-11	2.18555e-11
19.46	1.95494e-11	2.29536e-11	2.14967e-11	2.14967e-11	2.71147e-11	2.19696e-11	2.55986e-11	2.31948e-11	2.2252e-11	3.31493e-11	2.00049e-11	1.55446e-11	3.06285e-11	2.43892e-11	2.9492e-11	2.24066e-11	1.92384e-11	2.05641e-11	1.62155e-11	2.68552e-11	2.27408e-11	1.87849e-11	1.93133e-11	2.34792e-11	2.17551e-11	1.78471e-11	1.57686e-11	1.82536e-11	2.18563e-11
19.48	1.95435e-11	2.29592e-11	2.14869e-11	2.14869e-11	2.71067e-11	2.19622e-11	2.56033e-11	2.3202e-11	2.22546e-11	3.31571e-11	2.00054e-11	1.55401e-11	3.06325e-11	2.43893e-11	2.94851e-11	2.23965e-11	1.92368e-11	2.0568e-11	1.62191e-11	2.68192e-11	2.27441e-11	1.87848e-11	1.9311e-11	2.34781e-11	2.17563e-11	1.78336e-11	1.57671e-11	1.82408e-11	2.1851e-11
19.5	1.95399e-11	2.29627e-11	2.14962e-11	2.14962e-11	2.71059e-11	2.19634e-11	2.56048e-11	2.32003e-11	2.22523e-11	3.31519e-11	2.00035e-11	1.55428e-11	3.06349e-11	2.43912e-11	2.94873e-11	2.24018e-11	1.92401e-11	2.05613e-11	1.62155e-11	2.68169e-11	2.2753e-11	1.8785e-11	1.93148e-11	2.34785e-11	2.17553e-11	1.78383e-11	1.57657e-11	1.82438e-11	2.18455e-11
19.52	1.95409e-11	2.29561e-11	2.14853e-11	2.14853e-11	2.71084e-11	2.1951e-11	2.5604e-11	2.31989e-11	2.22537e-11	3.31591e-11	2.00059e-11	1.55435e-11	3.06298e-11	2.43879e-11	2.94889e-11	2.24006e-11	1.92383e-11	2.05648e-11	1.62201e-11	2.68314e-11	2.27506e-11	1.87835e-11	1.93152e-11	2.34806e-11	2.17538e-11	1.78464e-11	1.57718e-11	1.82512e-11	2.18502e-11
19.54	1.95414e-11	2.29553e-11	2.14946e-11	2.14946e-11	2.71063e-11	2.19567e-11	2.5603e-11	2.32025e-11	2.22534e-11	3.31615e-11	2.00058e-11	1.55432e-11	3.06315e-11	2.43932e-11	2.94884e-11	2.24008e-11	1.92386e-11	2.05574e-11	1.62356e-11	2.68151e-11	2.27484e-11	1.87781e-11	1.93059e-11	2.34779e-11	2.17528e-11	1.78498e-11	1.57679e-11	1.82408e-11	2.18574e-11
19.56	1.95348e-11	2.29494e-11	2.14907e-11	2.14907e-11	2.71093e-11	2.19534e-11	2.56024e-11	2.31964e-11	2.22607e-11	3.3154e-11	2.00011e-11	1.55417e-11	3.06323e-11	2.43876e-11	2.94866e-11	2.24014e-11	1.92395e-11	2.05685e-11	1.62189e-11	2.68531e-11	2.27431e-11	1.87811e-11	1.93064e-11	2.34729e-11	2.17486e-11	1.78406e-11	1.57622e-11	1.82471e-11	2.18571e-11
19.58	1.95437e-11	2.29512e-11	2.14956e-11	2.14956e-11	2.71057e-11	2.19511e-11	2.56033e-11	2.31988e-11	2.22544e-11	3.31544e-11	2.00031e-11	1.5545e-11	3.06341e-11	2.43839e-11	2.94897e-11	2.23983e-11	1.92394e-11	2.05675e-11	1.62137e-11	2.68279e-11	2.27493e-11	1.87857e-11	1.93065e-11	2.34794e-11	2.17529e-11	1.78502e-11	1.57723e-11	1.82511e-11	2.18682e-11
19.6	1.95429e-11	2.29501e-11	2.14929e-11	2.14929e-11	2.71078e-11	2.19547e-11	2.55954e-11	2.31954e-11	2.22556e-11	3.31519e-11	2.00052e-11	1.5548e-11	3.06327e-11	2.4391e-11	2.94866e-11	2.23985e-11	1.92438e-11	2.05725e-11	1.62137e-11	2.68153e-11	2.27417e-11	1.87857e-11	1.92964e-11	2.34765e-11	2.17478e-11	1.78523e-11	1.57668e-11	1.82424e-11	2.18601e-11
19.62	1.95376e-11	2.29479e-11	2.14958e-11	2.14958e-11	2.71108e-11	2.19479e-11	2.56e-11	2.3201e-11	2.22576e-11	3.31576e-11	2.00034e-11	1.55503e-11	3.06284e-11	2.43851e-11	2.94868e-11	2.2401e-11	1.92384e-11	2.05651e-11	1.62034e-11	2.68216e-11	2.27398e-11	1.8782e-11	1.93097e-11	2.34872e-11	2.1753e-11	1.78409e-11	1.57717e-11	1.82466e-11	2.1864e-11
19.64	1.95424e-11	2.29548e-11	2.14953e-11	2.14953e-11	2.71071e-11	2.19475e-11	2.56017e-11	2.3207e-11	2.22576e-11	3.31623e-11	2.00079e-11	1.55461e-11	3.06309e-11	2.439e-11	2.9482e-11	2.24041e-11	1.924e-11	2.05764e-11	1.6212e-11	2.68255e-11	2.27456e-11	1.87853e-11	1.93004e-11	2.34753e-11	2.17514e-11	1.784e-11	1.57753e-11	1.82454e-11	2.1862e-11
19.66	1.95419e-11	2.2954e-11	2.14919e-11	2.14919e-11	2.71098e-11	2.19457e-11	2.56005e-11	2.31962e-11	2.22614e-11	3.3161e-11	2.00046e-11	1.55478e-11	3.06351e-11	2.43904e-11	2.94884e-11	2.23994e-11	1.92405e-11	2.05716e-11	1.62101e-11	2.68315e-11	2.27408e-11	1.87816e-11	1.9305e-11	2.34778e-11	2.17493e-11	1.78436e-11	1.57611e-11	1.82452e-11	2.18575e-11
19.68	1.95445e-11	2.29504e-11	2.14954e-11	2.14954e-11	2.71038e-11	2.19502e-11	2.56048e-11	2.32023e-11	2.2259e-11	3.3165e-11	2.00045e-11	1.55561e-11	3.06307e-11	2.43874e-11	2.94825e-11	2.24029e-11	1.92386e-11	2.05726e-11	1.62075e-11	2.6846e-11	2.27458e-11	1.87817e-11	1.93021e-11	2.34796e-11	2.17519e-11	1.7847e-11	1.57632e-11	1.82502e-11	2.1858e-11
19.7	1.95412e-11	2.29481e-11	2.14926e-11	2.14926e-11	2.71083e-11	2.19489e-11	2.55981e-11	2.32021e-11	2.2262e-11	3.31567e-11	2.00006e-11	1.55482e-11	3.06286e-11	2.43843e-11	2.94844e-11	2.23993e-11	1.92439e-11	2.05679e-11	1.62065e-11	2.68348e-11	2.27491e-11	1.87789e-11	1.93016e-11	2.34808e-11	2.17553e-11	1.78446e-11	1.57746e-11	1.82477e-11	2.18542e-11
19.72	1.95425e-11	2.29555e-11	2.1494e-11	2.1494e-11	2.7105e-11	2.19506e-11	2.56052e-11	2.31954e-11	2.22612e-11	3.3168e-11	1.99979e-11	1.55547e-11	3.06323e-11	2.43851e-11	2.94825e-11	2.24011e-11	1.92393e-11	2.05733e-11	1.62205e-11	2.6837e-11	2.2743e-11	1.87791e-11	1.92951e-11	2.34819e-11	2.17582e-11	1.7853e-11	1.57722e-11	1.82441e-11	2.18606e-11
19.74	1.95424e-11	2.29566e-11	2.14906e-11	2.14906e-11	2.71118e-11	2.19372e-11	2.56008e-11	2.31974e-11	2.22646e-11	3.31621e-11	2.00032e-11	1.5554e-11	3.0634e-11	2.43835e-11	2.94881e-11	2.24017e-11	1.92416e-11	2.05768e-11	1.62238e-11	2.68387e-11	2.27451e-11	1.87845e-11	1.92972e-11	2.34793e-11	2.17566e-11	1.78495e-11	1.57815e-11	1.82484e-11	2.18561e-11
19.76	1.95462e-11	2.29476e-11	2.14912e-11	2.14912e-11	2.71103e-11	2.19348e-11	2.56067e-11	2.32022e-11	2.22607e-11	3.31666e-11	2.00015e-11	1.55502e-11	3.06298e-11	2.43802e-11	2.94946e-11	2.24034e-11	1.92422e-11	2.05729e-11	1.62224e-11	2.68345e-11	2.27498e-11	1.87766e-11	1.92977e-11	2.34841e-11	2.17605e-11	1.78439e-11	1.57787e-11	1.82515e-11	2.1863e-11
19.78	1.95433e-11	2.29534e-11	2.14975e-11	2.14975e-11	2.71029e-11	2.19408e-11	2.56032e-11	2.3199e-11	2.22608e-11	3.31627e-11	1.99985e-11	1.55617e-11	3.0626e-11	2.43795e-11	2.94873e-11	2.2401e-11	1.92393e-11	2.05766e-11	1.62238e-11	2.68313e-11	2.27446e-11	1.87826e-11	1.92992e-11	2.3479e-11	2.17463e-11	1.78521e-11	1.5769e-11	1.82509e-11	2.18613e-11
19.8	1.95496e-11	2.29603e-11	2.14935e-11	2.14935e-11	2.71076e-11	2.19431e-11	2.56025e-11	2.32019e-11	2.22625e-11	3.31597e-11	2.00035e-11	1.55523e-11	3.06242e-11	2.43744e-11	2.94842e-11	2.24021e-11	1.92374e-11	2.05628e-11	1.62194e-11	2.68187e-11	2.27461e-11	1.87814e-11	1.92964e-11	2.34768e-11	2.17504e-11	1.78527e-11	1.57738e-11	1.82463e-11	2.18662e-11
19.82	1.95412e-11	2.29535e-11	2.14953e-11	2.14953e-11	2.71086e-11	2.19343e-11	2.55983e-11	2.32012e-11	2.22655e-11	3.31651e-11	2.00023e-11	1.55607e-11	3.06292e-11	2.43778e-11	2.94899e-11	2.24001e-11	1.92425e-11	2.05565e-11	1.62197e-11	2.6818e-11	2.27391e-11	1.87805e-11	1.92897e-11	2.34784e-11	2.17487e-11	1.78409e-11	1.57701e-11	1.82463e-11	2.1857e-11
19.84	1.9546e-11	2.29546e-11	2.14955e-11	2.14955e-11	2.71023e-11	2.19364e-11	2.55965e-11	2.31976e-11	2.22655e-11	3.3166e-11	2.00073e-11	1.55558e-11	3.06326e-11	2.43795e-11	2.94943e-11	2.24047e-11	1.92388e-11	2.05589e-11	1.62094e-11	2.68591e-11	2.27539e-11	1.87758e-11	1.92933e-11	2.34816e-11	2.17525e-11	1.78457e-11	1.57631e-11	1.82477e-11	2.1856e-11
19.86	1.95412e-11	2.29537e-11	2.14883e-11	2.14883e-11	2.71047e-11	2.19382e-11	2.56035e-11	2.32019e-11	2.22636e-11	3.31712e-11	2.00053e-11	1.55617e-11	3.06326e-11	2.43829e-11	2.94853e-11	2.24009e-11	1.92398e-11	2.05589e-11	1.62051e-11	2.68345e-11	2.27479e-11	1.87792e-11	1.92877e-11	2.34753e-11	2.17539e-11	1.78427e-11	1.57683e-11	1.82504e-11	2.18619e-11
19.88	1.95434e-11	2.29464e-11	2.14932e-11	2.14932e-11	2.71061e-11	2.19491e-11	2.56032e-11	2.32039e-11	2.22634e-11	3.31604e-11	2.00022e-11	1.55589e-11	3.06275e-11	2.43845e-11	2.94931e-11	2.23977e-11	1.92393e-11	2.05603e-11	1.62075e-11	2.68484e-11	2.27541e-11	1.87826e-11	1.92907e-11	2.34733e-11	2.17529e-11	1.78477e-11	1.57504e-11	1.82473e-11	2.18603e-11
19.9	1.95424e-11	2.29505e-11	2.14962e-11	2.14962e-11	2.71043e-11	2.19413e-11	2.55965e-11	2.31974e-11	2.22687e-11	3.31646e-11	2.00065e-11	1.55662e-11	3.0629e-11	2.43842e-11	2.94859e-11	2.24016e-11	1.92414e-11	2.05598e-11	1.6211e-11	2.68352e-11	2.27445e-11	1.87799e-11	1.92902e-11	2.34794e-11	2.17523e-11	1.7837e-11	1.57747e-11	1.82542e-11	2.18611e-11
19.92	1.95396e-11	2.29497e-11	2.14884e-11	2.14884e-11	2.71068e-11	2.1939e-11	2.55998e-11	2.31993e-11	2.22658e-11	3.31606e-11	2.00061e-11	1.55618e-11	3.06264e-11	2.43829e-11	2.94954e-11	2.24012e-11	1.92409e-11	2.05609e-11	1.62116e-11	2.68275e-11	2.27516e-11	1.87779e-11	1.92851e-11	2.34776e-11	2.17497e-11	1.78319e-11	1.57641e-11	1.82551e-11	2.18631e-11
19.94	1.95407e-11	2.29576e-11	2.14922e-11	2.14922e-11	2.71039e-11	2.19376e-11	2.56045e-11	2.31989e-11	2.22662e-11	3.31679e-11	2.00095e-11	1.55616e-11	3.06274e-11	2.43824e-11	2.9492e-11	2.23978e-11	1.92455e-11	2.05638e-11	1.62252e-11	2.6842e-11	2.27516e-11	1.87786e-11	1.92872e-11	2.34801e-11	2.175e-11	1.78323e-11	1.57635e-11	1.82539e-11	2.18602e-11
19.96	1.95449e-11	2.29509e-11	2.14962e-11	2.14962e-11	2.71032e-11	2.19398e-11	2.56009e-11	2.3204e-11	2.22679e-11	3.31563e-11	2.00016e-11	1.55635e-11	3.06288e-11	2.43877e-11	2.94874e-11	2.2396e-11	1.92406e-11	2.05679e-11	1.62096e-11	2.68156e-11	2.27521e-11	1.87817e-11	1.92865e-11	2.34822e-11	2.17512e-11	1.78498e-11	1.57592e-11	1.82449e-11	2.18616e-11
19.98	1.95406e-11	2.29502e-11	2.14935e-11	2.14935e-11	2.71058e-11	2.19389e-11	2.56012e-11	2.31997e-11	2.22605e-11	3.31674e-11	2.00056e-11	1.55643e-11	3.06237e-11	2.43835e-11	2.94919e-11	2.23967e-11	1.92448e-11	2.05684e-11	1.62215e-11	2.68515e-11	2.27461e-11	1.87829e-11	1.92872e-11	2.34806e-11	2.17511e-11	1.78456e-11	1.57703e-11	1.82535e-11	2.18588e-11
20	1.95449e-11	2.29543e-11	2.1494e-11	2.1494e-11	2.71105e-11	2.19397e-11	2.56024e-11	2.32012e-11	2.22612e-11	3.31687e-11	2.00073e-11	1.55654e-11	3.06308e-11	2.43811e-11	2.94863e-11	2.24018e-11	1.9238e-11	2.05665e-11	1.62172e-11	2.68275e-11	2.27491e-11	1.87831e-11	1.92835e-11	2.34792e-11	2.17482e-11	1.78588e-11	1.57758e-11	1.82499e-11	2.18605e-11
20.02	1.95436e-11	2.29493e-11	2.1499e-11	2.1499e-11	2.7105e-11	2.19357e-11	2.56033e-11	2.32009e-11	2.22562e-11	3.31633e-11	2.00029e-11	1.55631e-11	3.06284e-11	2.43898e-11	2.94909e-11	2.24003e-11	1.92418e-11	2.05643e-11	1.62223e-11	2.68276e-11	2.27369e-11	1.87793e-11	1.9284e-11	2.34719e-11	2.17471e-11	1.78489e-11	1.57666e-11	1.82562e-11	2.18541e-11
20.04	1.95458e-11	2.2949e-11	2.14904e-11	2.14904e-11	2.71052e-11	2.19425e-11	2.56022e-11	2.31967e-11	2.22611e-11	3.31618e-11	2.00047e-11	1.55676e-11	3.06305e-11	2.4384e-11	2.94886e-11	2.24059e-11	1.92386e-11	2.05675e-11	1.62261e-11	2.68555e-11	2.27465e-11	1.87832e-11	1.92808e-11	2.3479e-11	2.17505e-11	1.78331e-11	1.57644e-11	1.82527e-11	2.18565e-11
20.06	1.95418e-11	2.29512e-11	2.14933e-11	2.14933e-11	2.71018e-11	2.19333e-11	2.55996e-11	2.32021e-11	2.22594e-11	3.31606e-11	2.00048e-11	1.55623e-11	3.06284e-11	2.43859e-11	2.94879e-11	2.24046e-11	1.92431e-11	2.05727e-11	1.62081e-11	2.68014e-11	2.27518e-11	1.8779e-11	1.92791e-11	2.34805e-11	2.17497e-11	1.78364e-11	1.5755e-11	1.82422e-11	2.18659e-11
20.08	1.95495e-11	2.29462e-11	2.14946e-11	2.14946e-11	2.71044e-11	2.19416e-11	2.56022e-11	2.31986e-11	2.2267e-11	3.31669e-11	2.00056e-11	1.55636e-11	3.06274e-11	2.43878e-11	2.94938e-11	2.24009e-11	1.92427e-11	2.05618e-11	1.62217e-11	2.6852e-11	2.27512e-11	1.87796e-11	1.92866e-11	2.34761e-11	2.17463e-11	1.78462e-11	1.57668e-11	1.82468e-11	2.18656e-11
20.1	1.95397e-11	2.29523e-11	2.14931e-11	2.14931e-11	2.71048e-11	2.19416e-11	2.55978e-11	2.31948e-11	2.22632e-11	3.31701e-11	2.00082e-11	1.55677e-11	3.06286e-11	2.4382e-11	2.94857e-11	2.23982e-11	1.92452e-11	2.05585e-11	1.62115e-11	2.68038e-11	2.27436e-11	1.87787e-11	1.92828e-11	2.34795e-11	2.17553e-11	1.78533e-11	1.57685e-11	1.82537e-11	2.18643e-11
20.12	1.95414e-11	2.29495e-11	2.14933e-11	2.14933e-11	2.71057e-11	2.19401e-11	2.56048e-11	2.32041e-11	2.2264e-11	3.31615e-11	2.00011e-11	1.55733e-11	3.06247e-11	2.43834e-11	2.94922e-11	2.24006e-11	1.92411e-11	2.05565e-11	1.62202e-11	2.68552e-11	2.2737e-11	1.8781e-11	1.92858e-11	2.347e-11	2.17546e-11	1.7855e-11	1.57664e-11	1.82455e-11	2.18661e-11
20.14	1.95467e-11	2.29542e-11	2.14926e-11	2.14926e-11	2.71087e-11	2.19438e-11	2.56058e-11	2.32039e-11	2.22655e-11	3.31775e-11	2.0004e-11	1.55684e-11	3.06249e-11	2.43824e-11	2.94872e-11	2.24025e-11	1.92381e-11	2.05635e-11	1.62194e-11	2.68143e-11	2.27412e-11	1.8779e-11	1.9288e-11	2.34731e-11	2.17634e-11	1.78595e-11	1.57811e-11	1.82515e-11	2.186e-11
20.16	1.95419e-11	2.295e-11	2.15074e-11	2.15074e-11	2.71034e-11	2.19449e-11	2.56067e-11	2.3204e-11	2.22619e-11	3.31677e-11	2.00059e-11	1.55695e-11	3.06252e-11	2.43871e-11	2.94865e-11	2.2401e-11	1.92353e-11	2.0561e-11	1.62222e-11	2.68445e-11	2.27437e-11	1.87773e-11	1.92839e-11	2.34764e-11	2.17524e-11	1.78497e-11	1.57649e-11	1.82562e-11	2.18671e-11
20.18	1.95446e-11	2.29498e-11	2.15209e-11	2.15209e-11	2.71012e-11	2.19386e-11	2.56018e-11	2.31993e-11	2.22673e-11	3.31763e-11	2.00041e-11	1.55668e-11	3.06318e-11	2.43829e-11	2.94908e-11	2.23999e-11	1.92364e-11	2.05699e-11	1.62207e-11	2.68385e-11	2.27438e-11	1.87794e-11	1.92878e-11	2.34826e-11	2.17523e-11	1.78593e-11	1.57677e-11	1.82514e-11	2.18687e-11
20.2	1.95445e-11	2.29477e-11	2.14995e-11	2.14995e-11	2.71042e-11	2.19428e-11	2.55981e-11	2.32029e-11	2.22628e-11	3.31722e-11	2.00005e-11	1.55712e-11	3.06267e-11	2.43884e-11	2.94871e-11	2.23988e-11	1.92363e-11	2.05652e-11	1.62133e-11	2.68432e-11	2.27403e-11	1.8776e-11	1.92853e-11	2.3469e-11	2.17518e-11	1.78624e-11	1.5777e-11	1.82489e-11	2.18585e-11
20.22	1.95412e-11	2.29516e-11	2.14967e-11	2.14967e-11	2.71071e-11	2.19473e-11	2.55994e-11	2.31979e-11	2.2267e-11	3.31607e-11	2.00054e-11	1.55746e-11	3.06262e-11	2.43867e-11	2.94879e-11	2.24034e-11	1.92342e-11	2.05655e-11	1.6209e-11	2.68257e-11	2.27437e-11	1.87762e-11	1.9279e-11	2.34776e-11	2.17513e-11	1.78653e-11	1.57666e-11	1.8247e-11	2.18594e-11
20.24	1.95369e-11	2.2952e-11	2.1471e-11	2.1471e-11	2.71048e-11	2.1935e-11	2.55976e-11	2.31963e-11	2.2269e-11	3.31633e-11	2.00032e-11	1.557e-11	3.06271e-11	2.43851e-11	2.9493e-11	2.23995e-11	1.92377e-11	2.05585e-11	1.62137e-11	2.68311e-11	2.27467e-11	1.87748e-11	1.92783e-11	2.34814e-11	2.17489e-11	1.78608e-11	1.57695e-11	1.82495e-11	2.18638e-11
20.26	1.95429e-11	2.29517e-11	2.1415e-11	2.1415e-11	2.71053e-11	2.19415e-11	2.56048e-11	2.31982e-11	2.22723e-11	3.31682e-11	2.00044e-11	1.5578e-11	3.06296e-11	2.43828e-11	2.94925e-11	2.24003e-11	1.92362e-11	2.05693e-11	1.62111e-11	2.68251e-11	2.27388e-11	1.87792e-11	1.92821e-11	2.34816e-11	2.17522e-11	1.78608e-11	1.57638e-11	1.82466e-11	2.18648e-11
20.28	1.95394e-11	2.29541e-11	2.13768e-11	2.13768e-11	2.70992e-11	2.19376e-11	2.55957e-11	2.31975e-11	2.22692e-11	3.31716e-11	2.00063e-11	1.55773e-11	3.06273e-11	2.43779e-11	2.94902e-11	2.23925e-11	1.92399e-11	2.0563e-11	1.62092e-11	2.68515e-11	2.27405e-11	1.87723e-11	1.9283e-11	2.34782e-11	2.17564e-11	1.78561e-11	1.57659e-11	1.82546e-11	2.18647e-11
20.3	1.9544e-11	2.29491e-11	2.13445e-11	2.13445e-11	2.70991e-11	2.19401e-11	2.56003e-11	2.32018e-11	2.22698e-11	3.31701e-11	2.00072e-11	1.55779e-11	3.06305e-11	2.43845e-11	2.9488e-11	2.2399e-11	1.92446e-11	2.05641e-11	1.62177e-11	2.68238e-11	2.27446e-11	1.87815e-11	1.92847e-11	2.34782e-11	2.17558e-11	1.78678e-11	1.57668e-11	1.82448e-11	2.18648e-11
20.32	1.95373e-11	2.2953e-11	2.13221e-11	2.13221e-11	2.71026e-11	2.19399e-11	2.5604e-11	2.31969e-11	2.22729e-11	3.31695e-11	2.00005e-11	1.55735e-11	3.06292e-11	2.4382e-11	2.9488e-11	2.23934e-11	1.92443e-11	2.05573e-11	1.62155e-11	2.6823e-11	2.27442e-11	1.87835e-11	1.92824e-11	2.34858e-11	2.17501e-11	1.78556e-11	1.57631e-11	1.82514e-11	2.18647e-11
20.34	1.9535e-11	2.29536e-11	2.13152e-11	2.13152e-11	2.71103e-11	2.19404e-11	2.56068e-11	2.32033e-11	2.22715e-11	3.31667e-11	1.99982e-11	1.55793e-11	3.06322e-11	2.43756e-11	2.9491e-11	2.23975e-11	1.92382e-11	2.05591e-11	1.62178e-11	2.68448e-11	2.27464e-11	1.87775e-11	1.92762e-11	2.34803e-11	2.17486e-11	1.78523e-11	1.57748e-11	1.82486e-11	2.1868e-11
20.36	1.95387e-11	2.29551e-11	2.13093e-11	2.13093e-11	2.71017e-11	2.19488e-11	2.56028e-11	2.32043e-11	2.22716e-11	3.31719e-11	2.0003e-11	1.55723e-11	3.06282e-11	2.43793e-11	2.94875e-11	2.24024e-11	1.92441e-11	2.05672e-11	1.62176e-11	2.68457e-11	2.27449e-11	1.87774e-11	1.92797e-11	2.34763e-11	2.1754e-11	1.78514e-11	1.57771e-11	1.82426e-11	2.18718e-11
20.38	1.95344e-11	2.29476e-11	2.13049e-11	2.13049e-11	2.71045e-11	2.19438e-11	2.5597e-11	2.32007e-11	2.22671e-11	3.31754e-11	2.00035e-11	1.55838e-11	3.06318e-11	2.43805e-11	2.94899e-11	2.23984e-11	1.92394e-11	2.05616e-11	1.6218e-11	2.68233e-11	2.27482e-11	1.87808e-11	1.92797e-11	2.3481e-11	2.17525e-11	1.78519e-11	1.57664e-11	1.82526e-11	2.18588e-11
20.4	1.95349e-11	2.29473e-11	2.13037e-11	2.13037e-11	2.71049e-11	2.19428e-11	2.5598e-11	2.31998e-11	2.22711e-11	3.31781e-11	2.00021e-11	1.55831e-11	3.06272e-11	2.4381e-11	2.94914e-11	2.24027e-11	1.92438e-11	2.05629e-11	1.62127e-11	2.68285e-11	2.27447e-11	1.87837e-11	1.92772e-11	2.34777e-11	2.17557e-11	1.78525e-11	1.57649e-11	1.82527e-11	2.18626e-11
20.42	1.9531e-11	2.29531e-11	2.13021e-11	2.13021e-11	2.71063e-11	2.19416e-11	2.5599e-11	2.31948e-11	2.22708e-11	3.31751e-11	2.00041e-11	1.55812e-11	3.06267e-11	2.43843e-11	2.94871e-11	2.24068e-11	1.92433e-11	2.0557e-11	1.62142e-11	2.68227e-11	2.27421e-11	1.87767e-11	1.92744e-11	2.3477e-11	2.17508e-11	1.78553e-11	1.57743e-11	1.82408e-11	2.18657e-11
20.44	1.95389e-11	2.29463e-11	2.12941e-11	2.12941e-11	2.71037e-11	2.19521e-11	2.55995e-11	2.31987e-11	2.22743e-11	3.31576e-11	2.00029e-11	1.55816e-11	3.06271e-11	2.43852e-11	2.94919e-11	2.24033e-11	1.92466e-11	2.05474e-11	1.62171e-11	2.68293e-11	2.2743e-11	1.87778e-11	1.92793e-11	2.34829e-11	2.17483e-11	1.78599e-11	1.57734e-11	1.82483e-11	2.18618e-11
20.46	1.95398e-11	2.29482e-11	2.12952e-11	2.12952e-11	2.71003e-11	2.19448e-11	2.56013e-11	2.31975e-11	2.22703e-11	3.31661e-11	2.00063e-11	1.55807e-11	3.06294e-11	2.43813e-11	2.9492e-11	2.24017e-11	1.92409e-11	2.05552e-11	1.62181e-11	2.68391e-11	2.27341e-11	1.87799e-11	1.92742e-11	2.34786e-11	2.1754e-11	1.78598e-11	1.57783e-11	1.8248e-11	2.18564e-11
20.48	1.95459e-11	2.29503e-11	2.12893e-11	2.12893e-11	2.71062e-11	2.19453e-11	2.56061e-11	2.3201e-11	2.22726e-11	3.31619e-11	2.00049e-11	1.55815e-11	3.06324e-11	2.43843e-11	2.94919e-11	2.23978e-11	1.92442e-11	2.05519e-11	1.62148e-11	2.68236e-11	2.27389e-11	1.8779e-11	1.928e-11	2.3483e-11	2.17515e-11	1.78509e-11	1.57627e-11	1.82555e-11	2.18604e-11
20.5	1.95404e-11	2.29574e-11	2.12916e-11	2.12916e-11	2.71069e-11	2.19537e-11	2.56025e-11	2.32008e-11	2.22749e-11	3.31667e-11	2.00079e-11	1.55842e-11	3.06279e-11	2.43916e-11	2.94924e-11	2.23989e-11	1.92397e-11	2.05617e-11	1.62091e-11	2.68156e-11	2.27417e-11	1.87747e-11	1.92761e-11	2.34755e-11	2.17509e-11	1.78633e-11	1.57683e-11	1.82469e-11	2.18618e-11
20.52	1.954e-11	2.29518e-11	2.12916e-11	2.12916e-11	2.71071e-11	2.19423e-11	2.56078e-11	2.31923e-11	2.22766e-11	3.31599e-11	2.0003e-11	1.55788e-11	3.06318e-11	2.43905e-11	2.9491e-11	2.23985e-11	1.92466e-11	2.05612e-11	1.62129e-11	2.68366e-11	2.27341e-11	1.87726e-11	1.92733e-11	2.34829e-11	2.17509e-11	1.78657e-11	1.57703e-11	1.82465e-11	2.18629e-11
20.54	1.95417e-11	2.29426e-11	2.1291e-11	2.1291e-11	2.71043e-11	2.19481e-11	2.5604e-11	2.32046e-11	2.22692e-11	3.31668e-11	2.00024e-11	1.55798e-11	3.06311e-11	2.43841e-11	2.94924e-11	2.23999e-11	1.92384e-11	2.05614e-11	1.62136e-11	2.68265e-11	2.27516e-11	1.87783e-11	1.9273e-11	2.34779e-11	2.17463e-11	1.78635e-11	1.57653e-11	1.82471e-11	2.18556e-11
20.56	1.95356e-11	2.29533e-11	2.12847e-11	2.12847e-11	2.71056e-11	2.19403e-11	2.56067e-11	2.32004e-11	2.22716e-11	3.31634e-11	2.00015e-11	1.5582e-11	3.06301e-11	2.43757e-11	2.94955e-11	2.23929e-11	1.92424e-11	2.05658e-11	1.62219e-11	2.68292e-11	2.27484e-11	1.87791e-11	1.92719e-11	2.34785e-11	2.17454e-11	1.78645e-11	1.5765e-11	1.82459e-11	2.18613e-11
20.58	1.95393e-11	2.29432e-11	2.12909e-11	2.12909e-11	2.71033e-11	2.19492e-11	2.5601e-11	2.32016e-11	2.22705e-11	3.31574e-11	2.00032e-11	1.55826e-11	3.06317e-11	2.43836e-11	2.94888e-11	2.24054e-11	1.9244e-11	2.05588e-11	1.62158e-11	2.68311e-11	2.27414e-11	1.87731e-11	1.92734e-11	2.34799e-11	2.1752e-11	1.78639e-11	1.5766e-11	1.82482e-11	2.18703e-11
20.6	1.95358e-11	2.29528e-11	2.12912e-11	2.12912e-11	2.7104e-11	2.19476e-11	2.55845e-11	2.31936e-11	2.22751e-11	3.31654e-11	2.00043e-11	1.55933e-11	3.06226e-11	2.43784e-11	2.94961e-11	2.24023e-11	1.92397e-11	2.05601e-11	1.6209e-11	2.68125e-11	2.27464e-11	1.87809e-11	1.92668e-11	2.34783e-11	2.17506e-11	1.78685e-11	1.57682e-11	1.82482e-11	2.18597e-11
20.62	1.95389e-11	2.29462e-11	2.12815e-11	2.12815e-11	2.7101e-11	2.19418e-11	2.56057e-11	2.32022e-11	2.22806e-11	3.31545e-11	2.00029e-11	1.55861e-11	3.06283e-11	2.4383e-11	2.94939e-11	2.24014e-11	1.92475e-11	2.05577e-11	1.6218e-11	2.68505e-11	2.27481e-11	1.87777e-11	1.92735e-11	2.34766e-11	2.17532e-11	1.78784e-11	1.57597e-11	1.82558e-11	2.18639e-11
20.64	1.95413e-11	2.29472e-11	2.12789e-11	2.12789e-11	2.7104e-11	2.19437e-11	2.56062e-11	2.31964e-11	2.22817e-11	3.31672e-11	2.00025e-11	1.5589e-11	3.06261e-11	2.43791e-11	2.94953e-11	2.23974e-11	1.92426e-11	2.05615e-11	1.62117e-11	2.68416e-11	2.27363e-11	1.87804e-11	1.92763e-11	2.3475e-11	2.17518e-11	1.78662e-11	1.57637e-11	1.82473e-11	2.18619e-11
20.66	1.95399e-11	2.29551e-11	2.12769e-11	2.12769e-11	2.7106e-11	2.19474e-11	2.56057e-11	2.32041e-11	2.22773e-11	3.31638e-11	2.00066e-11	1.55878e-11	3.06313e-11	2.43817e-11	2.94921e-11	2.24e-11	1.92423e-11	2.05719e-11	1.62046e-11	2.68299e-11	2.27431e-11	1.87749e-11	1.92731e-11	2.34795e-11	2.17507e-11	1.78701e-11	1.57738e-11	1.82516e-11	2.18693e-11
20.68	1.95363e-11	2.29513e-11	2.12788e-11	2.12788e-11	2.71051e-11	2.19471e-11	2.56075e-11	2.32029e-11	2.22758e-11	3.31667e-11	1.99989e-11	1.55919e-11	3.06288e-11	2.43823e-11	2.94891e-11	2.24032e-11	1.9242e-11	2.05608e-11	1.62059e-11	2.68351e-11	2.2753e-11	1.87775e-11	1.92756e-11	2.34755e-11	2.17462e-11	1.78644e-11	1.57631e-11	1.82429e-11	2.18639e-11
20.7	1.95332e-11	2.29472e-11	2.12815e-11	2.12815e-11	2.71009e-11	2.19485e-11	2.5604e-11	2.32002e-11	2.22784e-11	3.3171e-11	2.0005e-11	1.55854e-11	3.06263e-11	2.43808e-11	2.94929e-11	2.24009e-11	1.92449e-11	2.0564e-11	1.62106e-11	2.6816e-11	2.27387e-11	1.87832e-11	1.92697e-11	2.34837e-11	2.17438e-11	1.78522e-11	1.57596e-11	1.82494e-11	2.18576e-11
20.72	1.95461e-11	2.29493e-11	2.12732e-11	2.12732e-11	2.71039e-11	2.19456e-11	2.56034e-11	2.32035e-11	2.22774e-11	3.31632e-11	2.0004e-11	1.55903e-11	3.06272e-11	2.4386e-11	2.94914e-11	2.23994e-11	1.92403e-11	2.05578e-11	1.62148e-11	2.68312e-11	2.27362e-11	1.87799e-11	1.92698e-11	2.34819e-11	2.17509e-11	1.78646e-11	1.57705e-11	1.82491e-11	2.18568e-11
20.74	1.95406e-11	2.29449e-11	2.12767e-11	2.12767e-11	2.71063e-11	2.19518e-11	2.55984e-11	2.31923e-11	2.22784e-11	3.316e-11	2.00059e-11	1.5594e-11	3.06306e-11	2.43872e-11	2.94907e-11	2.2399e-11	1.92438e-11	2.05572e-11	1.62165e-11	2.6838e-11	2.27416e-11	1.87797e-11	1.92724e-11	2.34832e-11	2.17507e-11	1.78722e-11	1.57623e-11	1.82496e-11	2.18594e-11
20.76	1.954e-11	2.29498e-11	2.1272e-11	2.1272e-11	2.71046e-11	2.19567e-11	2.5594e-11	2.31952e-11	2.228e-11	3.31615e-11	2.00044e-11	1.55917e-11	3.06325e-11	2.43882e-11	2.94886e-11	2.23972e-11	1.92447e-11	2.05595e-11	1.62211e-11	2.68118e-11	2.27481e-11	1.87761e-11	1.92687e-11	2.348e-11	2.17529e-11	1.78708e-11	1.57641e-11	1.82452e-11	2.18686e-11
20.78	1.95433e-11	2.29461e-11	2.12723e-11	2.12723e-11	2.71032e-11	2.19461e-11	2.55902e-11	2.32047e-11	2.22734e-11	3.316e-11	2.00026e-11	1.55957e-11	3.06296e-11	2.43854e-11	2.94913e-11	2.24035e-11	1.92365e-11	2.05657e-11	1.62193e-11	2.68171e-11	2.27444e-11	1.87707e-11	1.92677e-11	2.34774e-11	2.17505e-11	1.78743e-11	1.57632e-11	1.82518e-11	2.18639e-11
20.8	1.95378e-11	2.29507e-11	2.12725e-11	2.12725e-11	2.71052e-11	2.19435e-11	2.55724e-11	2.32025e-11	2.22736e-11	3.31614e-11	2.00028e-11	1.55911e-11	3.06304e-11	2.43839e-11	2.94929e-11	2.23972e-11	1.92431e-11	2.0556e-11	1.62186e-11	2.68325e-11	2.27443e-11	1.87758e-11	1.92693e-11	2.34828e-11	2.17514e-11	1.78722e-11	1.57588e-11	1.82492e-11	2.18631e-11
20.82	1.95422e-11	2.29535e-11	2.12665e-11	2.12665e-11	2.71047e-11	2.19488e-11	2.55512e-11	2.32011e-11	2.22765e-11	3.31683e-11	2.00029e-11	1.55906e-11	3.06289e-11	2.43809e-11	2.94931e-11	2.23948e-11	1.92404e-11	2.0559e-11	1.62174e-11	2.68377e-11	2.27463e-11	1.87725e-11	1.92734e-11	2.34802e-11	2.17462e-11	1.78795e-11	1.57686e-11	1.8246e-11	2.18642e-11
20.84	1.95387e-11	2.29544e-11	2.1268e-11	2.1268e-11	2.71027e-11	2.19479e-11	2.55185e-11	2.31946e-11	2.22765e-11	3.31609e-11	2.00013e-11	1.55885e-11	3.06315e-11	2.43802e-11	2.94899e-11	2.23978e-11	1.92434e-11	2.05587e-11	1.6222e-11	2.68182e-11	2.27465e-11	1.87807e-11	1.92692e-11	2.34791e-11	2.17535e-11	1.7869e-11	1.5758e-11	1.82522e-11	2.18703e-11
20.86	1.9539e-11	2.29511e-11	2.12646e-11	2.12646e-11	2.71031e-11	2.19614e-11	2.54848e-11	2.31927e-11	2.22762e-11	3.31658e-11	2.00008e-11	1.5594e-11	3.06255e-11	2.43788e-11	2.94804e-11	2.23966e-11	1.92414e-11	2.0561e-11	1.62223e-11	2.68355e-11	2.27445e-11	1.87697e-11	1.92656e-11	2.34825e-11	2.1747e-11	1.78747e-11	1.57772e-11	1.82486e-11	2.18631e-11
20.88	1.95373e-11	2.29508e-11	2.12628e-11	2.12628e-11	2.71054e-11	2.19523e-11	2.54507e-11	2.32017e-11	2.22763e-11	3.31633e-11	2.00042e-11	1.55938e-11	3.06302e-11	2.43837e-11	2.94893e-11	2.23979e-11	1.92392e-11	2.05677e-11	1.62145e-11	2.68352e-11	2.27422e-11	1.87703e-11	1.92681e-11	2.34814e-11	2.17419e-11	1.78833e-11	1.57701e-11	1.82519e-11	2.18614e-11
20.9	1.95373e-11	2.29501e-11	2.12562e-11	2.12562e-11	2.7103e-11	2.19482e-11	2.5413e-11	2.31966e-11	2.22791e-11	3.31636e-11	2.00052e-11	1.55995e-11	3.06262e-11	2.43888e-11	2.949e-11	2.2405e-11	1.92421e-11	2.05634e-11	1.6221e-11	2.68409e-11	2.27433e-11	1.87725e-11	1.92679e-11	2.34821e-11	2.17473e-11	1.78822e-11	1.57588e-11	1.8254e-11	2.18647e-11
20.92	1.95367e-11	2.29529e-11	2.12607e-11	2.12607e-11	2.7104e-11	2.19522e-11	2.53789e-11	2.32015e-11	2.22776e-11	3.31621e-11	2.00038e-11	1.55907e-11	3.06329e-11	2.43796e-11	2.94893e-11	2.24036e-11	1.92373e-11	2.05656e-11	1.62278e-11	2.68396e-11	2.27458e-11	1.87707e-11	1.92669e-11	2.34746e-11	2.17487e-11	1.78757e-11	1.5762e-11	1.82484e-11	2.18586e-11
20.94	1.95416e-11	2.29535e-11	2.12606e-11	2.12606e-11	2.71027e-11	2.19539e-11	2.53549e-11	2.31968e-11	2.22803e-11	3.31536e-11	2.00056e-11	1.55924e-11	3.06295e-11	2.4383e-11	2.94897e-11	2.24085e-11	1.92444e-11	2.05675e-11	1.62319e-11	2.68166e-11	2.2748e-11	1.87741e-11	1.92727e-11	2.34784e-11	2.17485e-11	1.78777e-11	1.57683e-11	1.82474e-11	2.1865e-11
20.96	1.95357e-11	2.2956e-11	2.12545e-11	2.12545e-11	2.71053e-11	2.1952e-11	2.5324e-11	2.32052e-11	2.228e-11	3.31623e-11	2.00017e-11	1.55974e-11	3.06289e-11	2.43835e-11	2.9488e-11	2.24011e-11	1.92447e-11	2.05658e-11	1.62281e-11	2.68234e-11	2.27412e-11	1.8772e-11	1.92676e-11	2.34806e-11	2.17513e-11	1.78842e-11	1.57665e-11	1.82523e-11	2.18665e-11
20.98	1.95411e-11	2.29491e-11	2.12492e-11	2.12492e-11	2.71014e-11	2.19569e-11	2.53048e-11	2.32044e-11	2.22804e-11	3.31663e-11	2.00052e-11	1.55957e-11	3.0635e-11	2.43843e-11	2.94888e-11	2.24012e-11	1.92418e-11	2.05634e-11	1.6225e-11	2.68462e-11	2.27497e-11	1.87733e-11	1.92655e-11	2.34802e-11	2.17476e-11	1.78889e-11	1.57738e-11	1.82498e-11	2.18664e-11
21	1.95351e-11	2.295e-11	2.12466e-11	2.12466e-11	2.71045e-11	2.19521e-11	2.5285e-11	2.32032e-11	2.22771e-11	3.31643e-11	2.00062e-11	1.55945e-11	3.06343e-11	2.4381e-11	2.94867e-11	2.24036e-11	1.92415e-11	2.05711e-11	1.62193e-11	2.68407e-11	2.27434e-11	1.87732e-11	1.92699e-11	2.34815e-11	2.17453e-11	1.78872e-11	1.57812e-11	1.82501e-11	2.18706e-11
21.02	1.95407e-11	2.29543e-11	2.12459e-11	2.12459e-11	2.70994e-11	2.19654e-11	2.5273e-11	2.31949e-11	2.22739e-11	3.31614e-11	2.00059e-11	1.55958e-11	3.06359e-11	2.43769e-11	2.94895e-11	2.24011e-11	1.92396e-11	2.05673e-11	1.62191e-11	2.68505e-11	2.27468e-11	1.87734e-11	1.92653e-11	2.34798e-11	2.17429e-11	1.78826e-11	1.57655e-11	1.82484e-11	2.18633e-11
21.04	1.95353e-11	2.29468e-11	2.12406e-11	2.12406e-11	2.71042e-11	2.19589e-11	2.52588e-11	2.32051e-11	2.22852e-11	3.31579e-11	2.00057e-11	1.5594e-11	3.06318e-11	2.4386e-11	2.94873e-11	2.24065e-11	1.92423e-11	2.05699e-11	1.62086e-11	2.68153e-11	2.2746e-11	1.87748e-11	1.92703e-11	2.34769e-11	2.17407e-11	1.78875e-11	1.57592e-11	1.82474e-11	2.18631e-11
21.06	1.95329e-11	2.29498e-11	2.12491e-11	2.12491e-11	2.71061e-11	2.19588e-11	2.52457e-11	2.32052e-11	2.22828e-11	3.31711e-11	2.00076e-11	1.55993e-11	3.0629e-11	2.43874e-11	2.94918e-11	2.24026e-11	1.92451e-11	2.05702e-11	1.62101e-11	2.68151e-11	2.27524e-11	1.87814e-11	1.92619e-11	2.34796e-11	2.17505e-11	1.7896e-11	1.57635e-11	1.82485e-11	2.18595e-11
21.08	1.95405e-11	2.29532e-11	2.1241e-11	2.1241e-11	2.71017e-11	2.19588e-11	2.52306e-11	2.32057e-11	2.22842e-11	3.31646e-11	2.00119e-11	1.56052e-11	3.0628e-11	2.438e-11	2.9493e-11	2.23956e-11	1.9249e-11	2.05717e-11	1.62118e-11	2.68397e-11	2.2753e-11	1.87734e-11	1.92609e-11	2.34743e-11	2.1749e-11	1.78866e-11	1.57657e-11	1.82458e-11	2.18557e-11
21.1	1.95415e-11	2.29492e-11	2.12405e-11	2.12405e-11	2.71053e-11	2.19624e-11	2.52223e-11	2.3201e-11	2.22796e-11	3.31619e-11	2.00084e-11	1.5597e-11	3.0632e-11	2.43839e-11	2.94925e-11	2.24002e-11	1.924e-11	2.05658e-11	1.6218e-11	2.68579e-11	2.27536e-11	1.87811e-11	1.92649e-11	2.34786e-11	2.17538e-11	1.78818e-11	1.57706e-11	1.82545e-11	2.18582e-11
21.12	1.95387e-11	2.29469e-11	2.12384e-11	2.12384e-11	2.71088e-11	2.19597e-11	2.52178e-11	2.32012e-11	2.22822e-11	3.3162e-11	2.00047e-11	1.56009e-11	3.06307e-11	2.43819e-11	2.94865e-11	2.23956e-11	1.92392e-11	2.05585e-11	1.62202e-11	2.68789e-11	2.2748e-11	1.87764e-11	1.92644e-11	2.34755e-11	2.17538e-11	1.78889e-11	1.5776e-11	1.82517e-11	2.186e-11
21.14	1.95399e-11	2.29566e-11	2.12363e-11	2.12363e-11	2.71067e-11	2.19593e-11	2.52129e-11	2.3195e-11	2.2285e-11	3.31655e-11	2.00075e-11	1.56016e-11	3.06345e-11	2.4385e-11	2.94905e-11	2.23956e-11	1.92438e-11	2.05641e-11	1.62113e-11	2.67968e-11	2.2751e-11	1.87755e-11	1.92601e-11	2.3482e-11	2.17456e-11	1.78926e-11	1.57674e-11	1.82497e-11	2.18649e-11
21.16	1.95346e-11	2.29505e-11	2.12331e-11	2.12331e-11	2.71072e-11	2.19634e-11	2.52078e-11	2.32003e-11	2.22866e-11	3.31647e-11	2.00063e-11	1.56027e-11	3.06246e-11	2.4386e-11	2.94834e-11	2.23976e-11	1.92394e-11	2.05661e-11	1.62183e-11	2.68355e-11	2.27506e-11	1.87746e-11	1.92658e-11	2.34788e-11	2.17446e-11	1.7904e-11	1.57668e-11	1.82501e-11	2.18617e-11
21.18	1.95375e-11	2.29587e-11	2.12346e-11	2.12346e-11	2.71081e-11	2.19624e-11	2.51963e-11	2.32007e-11	2.2288e-11	3.31625e-11	2.00093e-11	1.56017e-11	3.06309e-11	2.4384e-11	2.94878e-11	2.24051e-11	1.92433e-11	2.05619e-11	1.62067e-11	2.68361e-11	2.27419e-11	1.87708e-11	1.92654e-11	2.34865e-11	2.17512e-11	1.79087e-11	1.57821e-11	1.82489e-11	2.18657e-11
21.2	1.95387e-11	2.29573e-11	2.12341e-11	2.12341e-11	2.70989e-11	2.1963e-11	2.51908e-11	2.32078e-11	2.22873e-11	3.31577e-11	2.00074e-11	1.56065e-11	3.06302e-11	2.43837e-11	2.94883e-11	2.24041e-11	1.92415e-11	2.05572e-11	1.62208e-11	2.68139e-11	2.275e-11	1.87726e-11	1.92694e-11	2.34768e-11	2.17493e-11	1.78932e-11	1.58384e-11	1.82494e-11	2.18632e-11
21.22	1.95379e-11	2.29554e-11	2.12265e-11	2.12265e-11	2.70983e-11	2.19665e-11	2.51871e-11	2.32007e-11	2.22816e-11	3.31567e-11	2.00082e-11	1.5599e-11	3.06387e-11	2.43796e-11	2.94874e-11	2.24041e-11	1.92453e-11	2.05613e-11	1.62031e-11	2.68433e-11	2.27414e-11	1.87688e-11	1.92706e-11	2.34854e-11	2.17497e-11	1.79104e-11	1.57696e-11	1.82568e-11	2.18672e-11
21.24	1.95427e-11	2.29491e-11	2.12329e-11	2.12329e-11	2.71009e-11	2.19686e-11	2.5184e-11	2.32041e-11	2.22861e-11	3.31614e-11	2.00091e-11	1.56054e-11	3.06337e-11	2.43884e-11	2.94957e-11	2.23998e-11	1.92423e-11	2.05563e-11	1.6215e-11	2.6828e-11	2.2748e-11	1.8773e-11	1.9268e-11	2.34836e-11	2.17495e-11	1.78981e-11	1.57707e-11	1.82425e-11	2.18677e-11
21.26	1.95277e-11	2.29599e-11	2.1227e-11	2.1227e-11	2.71042e-11	2.1965e-11	2.51831e-11	2.32008e-11	2.22844e-11	3.31606e-11	2.0008e-11	1.56105e-11	3.06283e-11	2.43843e-11	2.94913e-11	2.23984e-11	1.92408e-11	2.05608e-11	1.62068e-11	2.68295e-11	2.27398e-11	1.87715e-11	1.92723e-11	2.34746e-11	2.17467e-11	1.78935e-11	1.57355e-11	1.82529e-11	2.18659e-11
21.28	1.95396e-11	2.29549e-11	2.12272e-11	2.12272e-11	2.7104e-11	2.19669e-11	2.5175e-11	2.31991e-11	2.22877e-11	3.31644e-11	2.00091e-11	1.56085e-11	3.06273e-11	2.43826e-11	2.94913e-11	2.2407e-11	1.9248e-11	2.05661e-11	1.62134e-11	2.68466e-11	2.27418e-11	1.87717e-11	1.92723e-11	2.3483e-11	2.17498e-11	1.7882e-11	1.56295e-11	1.82488e-11	2.18639e-11
21.3	1.95396e-11	2.29509e-11	2.12316e-11	2.12316e-11	2.71045e-11	2.19678e-11	2.51707e-11	2.31987e-11	2.22834e-11	3.31637e-11	2.00139e-11	1.56073e-11	3.06264e-11	2.43796e-11	2.94947e-11	2.23977e-11	1.92428e-11	2.05683e-11	1.6214e-11	2.68179e-11	2.27355e-11	1.87737e-11	1.92622e-11	2.34737e-11	2.17469e-11	1.78965e-11	1.55412e-11	1.82485e-11	2.18607e-11
21.32	1.95416e-11	2.29559e-11	2.12269e-11	2.12269e-11	2.71071e-11	2.19693e-11	2.51722e-11	2.31951e-11	2.22858e-11	3.31623e-11	2.00071e-11	1.5602e-11	3.06364e-11	2.43787e-11	2.94933e-11	2.24046e-11	1.92424e-11	2.05638e-11	1.62121e-11	2.68132e-11	2.27399e-11	1.87754e-11	1.92684e-11	2.34747e-11	2.17441e-11	1.78904e-11	1.55181e-11	1.82525e-11	2.1868e-11
21.34	1.95334e-11	2.29523e-11	2.12213e-11	2.12213e-11	2.71073e-11	2.19725e-11	2.51717e-11	2.32045e-11	2.22893e-11	3.31623e-11	2.00054e-11	1.56053e-11	3.06307e-11	2.43824e-11	2.94884e-11	2.24069e-11	1.9246e-11	2.0562e-11	1.62179e-11	2.68073e-11	2.27499e-11	1.87699e-11	1.92665e-11	2.34778e-11	2.17513e-11	1.78866e-11	1.54903e-11	1.82556e-11	2.18638e-11
21.36	1.95357e-11	2.29599e-11	2.12244e-11	2.12244e-11	2.7106e-11	2.19728e-11	2.51692e-11	2.31995e-11	2.22911e-11	3.3152e-11	2.00086e-11	1.56036e-11	3.06335e-11	2.43812e-11	2.94901e-11	2.24024e-11	1.92424e-11	2.05704e-11	1.62118e-11	2.68395e-11	2.27456e-11	1.87802e-11	1.92686e-11	2.34789e-11	2.17468e-11	1.7885e-11	1.54784e-11	1.82434e-11	2.1876e-11
21.38	1.95386e-11	2.29566e-11	2.12209e-11	2.12209e-11	2.71034e-11	2.19702e-11	2.51668e-11	2.32014e-11	2.22888e-11	3.31625e-11	2.0004e-11	1.56099e-11	3.06338e-11	2.43829e-11	2.94886e-11	2.24013e-11	1.92467e-11	2.0565e-11	1.62028e-11	2.68269e-11	2.27422e-11	1.87731e-11	1.92618e-11	2.34755e-11	2.17525e-11	1.79001e-11	1.5474e-11	1.8248e-11	2.18709e-11
21.4	1.9533e-11	2.29498e-11	2.12218e-11	2.12218e-11	2.71033e-11	2.19695e-11	2.51682e-11	2.31969e-11	2.22911e-11	3.31634e-11	2.0007e-11	1.56093e-11	3.06278e-11	2.43802e-11	2.94869e-11	2.24053e-11	1.924e-11	2.05685e-11	1.6196e-11	2.68282e-11	2.27324e-11	1.87758e-11	1.92654e-11	2.34753e-11	2.17494e-11	1.78949e-11	1.54797e-11	1.82526e-11	2.18672e-11
21.42	1.95432e-11	2.29563e-11	2.12175e-11	2.12175e-11	2.7102e-11	2.19677e-11	2.51706e-11	2.32005e-11	2.22889e-11	3.31629e-11	2.00078e-11	1.56111e-11	3.0626e-11	2.43808e-11	2.94837e-11	2.24019e-11	1.92406e-11	2.05647e-11	1.61986e-11	2.6829e-11	2.27437e-11	1.8775e-11	1.92649e-11	2.3476e-11	2.17427e-11	1.78797e-11	1.54776e-11	1.82522e-11	2.186e-11
21.44	1.95285e-11	2.29514e-11	2.12147e-11	2.12147e-11	2.71039e-11	2.19752e-11	2.51656e-11	2.31997e-11	2.22873e-11	3.31576e-11	2.00083e-11	1.56101e-11	3.06286e-11	2.43835e-11	2.94849e-11	2.23996e-11	1.92423e-11	2.05639e-11	1.62148e-11	2.6805e-11	2.27417e-11	1.87767e-11	1.92612e-11	2.34794e-11	2.17462e-11	1.78878e-11	1.54757e-11	1.82482e-11	2.18599e-11
21.46	1.95357e-11	2.29553e-11	2.12146e-11	2.12146e-11	2.71028e-11	2.19817e-11	2.51661e-11	2.31994e-11	2.22935e-11	3.31577e-11	2.00048e-11	1.56105e-11	3.06303e-11	2.43809e-11	2.94914e-11	2.23993e-11	1.92439e-11	2.05674e-11	1.62206e-11	2.68207e-11	2.27368e-11	1.87774e-11	1.92654e-11	2.34799e-11	2.17422e-11	1.78879e-11	1.54768e-11	1.82465e-11	2.1865e-11
21.48	1.95263e-11	2.2954e-11	2.12173e-11	2.12173e-11	2.711e-11	2.19649e-11	2.51652e-11	2.31968e-11	2.22928e-11	3.31668e-11	2.00018e-11	1.56105e-11	3.06374e-11	2.43819e-11	2.94872e-11	2.2406e-11	1.92456e-11	2.05684e-11	1.62145e-11	2.67914e-11	2.27419e-11	1.87709e-11	1.92608e-11	2.34805e-11	2.17498e-11	1.78805e-11	1.54808e-11	1.82541e-11	2.18665e-11
21.5	1.95361e-11	2.29449e-11	2.12169e-11	2.12169e-11	2.71051e-11	2.19698e-11	2.51601e-11	2.32053e-11	2.22942e-11	3.31676e-11	2.00069e-11	1.56145e-11	3.06323e-11	2.43837e-11	2.94891e-11	2.24072e-11	1.92431e-11	2.05656e-11	1.62159e-11	2.68279e-11	2.27391e-11	1.87719e-11	1.92682e-11	2.34794e-11	2.17469e-11	1.78942e-11	1.54721e-11	1.82492e-11	2.18715e-11
21.52	1.95388e-11	2.29495e-11	2.12093e-11	2.12093e-11	2.71083e-11	2.1976e-11	2.51542e-11	2.32003e-11	2.22928e-11	3.31579e-11	2.00131e-11	1.56133e-11	3.06291e-11	2.43879e-11	2.94839e-11	2.23998e-11	1.92403e-11	2.0574e-11	1.62146e-11	2.68491e-11	2.27389e-11	1.87754e-11	1.92662e-11	2.34827e-11	2.17522e-11	1.78873e-11	1.54625e-11	1.82471e-11	2.18668e-11
21.54	1.95321e-11	2.29525e-11	2.12116e-11	2.12116e-11	2.71038e-11	2.19748e-11	2.51637e-11	2.31934e-11	2.22889e-11	3.31601e-11	2.00081e-11	1.56124e-11	3.06267e-11	2.43801e-11	2.94896e-11	2.23998e-11	1.92478e-11	2.05673e-11	1.62104e-11	2.67984e-11	2.27366e-11	1.87762e-11	1.92642e-11	2.34791e-11	2.1749e-11	1.7888e-11	1.54578e-11	1.82449e-11	2.18672e-11
21.56	1.95352e-11	2.29468e-11	2.12023e-11	2.12023e-11	2.71047e-11	2.19769e-11	2.51597e-11	2.32022e-11	2.22964e-11	3.31656e-11	2.00064e-11	1.56105e-11	3.06322e-11	2.43803e-11	2.94852e-11	2.24e-11	1.9239e-11	2.05707e-11	1.62052e-11	2.68181e-11	2.27506e-11	1.87781e-11	1.92587e-11	2.34763e-11	2.1751e-11	1.78779e-11	1.54566e-11	1.82539e-11	2.18672e-11
21.58	1.95364e-11	2.29526e-11	2.12069e-11	2.12069e-11	2.7106e-11	2.19763e-11	2.51617e-11	2.32061e-11	2.22905e-11	3.31606e-11	2.00036e-11	1.56046e-11	3.06328e-11	2.43828e-11	2.94829e-11	2.2401e-11	1.92456e-11	2.05737e-11	1.62021e-11	2.68096e-11	2.27412e-11	1.87699e-11	1.92604e-11	2.34765e-11	2.17444e-11	1.78876e-11	1.54548e-11	1.82524e-11	2.1861e-11
21.6	1.95338e-11	2.29566e-11	2.12045e-11	2.12045e-11	2.71055e-11	2.19741e-11	2.51597e-11	2.32031e-11	2.22904e-11	3.31611e-11	2.00067e-11	1.56072e-11	3.0636e-11	2.43844e-11	2.94876e-11	2.24045e-11	1.9241e-11	2.05716e-11	1.62142e-11	2.68184e-11	2.27467e-11	1.87724e-11	1.92595e-11	2.3486e-11	2.17412e-11	1.78762e-11	1.5456e-11	1.825e-11	2.18623e-11
21.62	1.95345e-11	2.29507e-11	2.12071e-11	2.12071e-11	2.71094e-11	2.19748e-11	2.51638e-11	2.32017e-11	2.22888e-11	3.31627e-11	2.00068e-11	1.56153e-11	3.06336e-11	2.43803e-11	2.94843e-11	2.23969e-11	1.92454e-11	2.05705e-11	1.62063e-11	2.68061e-11	2.27335e-11	1.87748e-11	1.92601e-11	2.34872e-11	2.17404e-11	1.78832e-11	1.54573e-11	1.82468e-11	2.18602e-11
21.64	1.95308e-11	2.2949e-11	2.12058e-11	2.12058e-11	2.7101e-11	2.19738e-11	2.5156e-11	2.31969e-11	2.22899e-11	3.31615e-11	2.00097e-11	1.5615e-11	3.06329e-11	2.43829e-11	2.94823e-11	2.24042e-11	1.92425e-11	2.05703e-11	1.62033e-11	2.68393e-11	2.27413e-11	1.87712e-11	1.92711e-11	2.3482e-11	2.17508e-11	1.78813e-11	1.5457e-11	1.82478e-11	2.18677e-11
21.66	1.95366e-11	2.29491e-11	2.12012e-11	2.12012e-11	2.71115e-11	2.1979e-11	2.51579e-11	2.31965e-11	2.22951e-11	3.31681e-11	2.00097e-11	1.56198e-11	3.06338e-11	2.43793e-11	2.94851e-11	2.24007e-11	1.92426e-11	2.05725e-11	1.62152e-11	2.67894e-11	2.2747e-11	1.87745e-11	1.92666e-11	2.34726e-11	2.17482e-11	1.78716e-11	1.54399e-11	1.82448e-11	2.18623e-11
21.68	1.95351e-11	2.29552e-11	2.12065e-11	2.12065e-11	2.71061e-11	2.19775e-11	2.51566e-11	2.32054e-11	2.22954e-11	3.31686e-11	2.00089e-11	1.56114e-11	3.06359e-11	2.43835e-11	2.94856e-11	2.23985e-11	1.92454e-11	2.05679e-11	1.62173e-11	2.67866e-11	2.27476e-11	1.87696e-11	1.92667e-11	2.34759e-11	2.17505e-11	1.788e-11	1.54376e-11	1.82508e-11	2.18702e-11
21.7	1.95355e-11	2.29536e-11	2.11997e-11	2.11997e-11	2.71046e-11	2.19876e-11	2.51572e-11	2.32009e-11	2.22991e-11	3.31658e-11	2.00046e-11	1.56139e-11	3.06311e-11	2.43846e-11	2.9488e-11	2.24066e-11	1.92449e-11	2.05685e-11	1.62192e-11	2.68237e-11	2.27456e-11	1.877e-11	1.92617e-11	2.34797e-11	2.17519e-11	1.7887e-11	1.54391e-11	1.82519e-11	2.18613e-11
21.72	1.9527e-11	2.29556e-11	2.11994e-11	2.11994e-11	2.71035e-11	2.19855e-11	2.51566e-11	2.32064e-11	2.22953e-11	3.31678e-11	2.00118e-11	1.5618e-11	3.06298e-11	2.43806e-11	2.94838e-11	2.24018e-11	1.92432e-11	2.0571e-11	1.62107e-11	2.68306e-11	2.27433e-11	1.87753e-11	1.92631e-11	2.3477e-11	2.17452e-11	1.78723e-11	1.54393e-11	1.82511e-11	2.18631e-11
21.74	1.95428e-11	2.29581e-11	2.11955e-11	2.11955e-11	2.71036e-11	2.19793e-11	2.51504e-11	2.32039e-11	2.22956e-11	3.31683e-11	2.0004e-11	1.56196e-11	3.06336e-11	2.4379e-11	2.94898e-11	2.24e-11	1.92406e-11	2.05717e-11	1.62131e-11	2.68413e-11	2.27419e-11	1.8775e-11	1.92666e-11	2.34738e-11	2.17429e-11	1.78681e-11	1.54202e-11	1.82501e-11	2.18585e-11
21.76	1.95337e-11	2.29514e-11	2.11949e-11	2.11949e-11	2.70967e-11	2.19826e-11	2.51535e-11	2.32065e-11	2.22926e-11	3.31668e-11	2.00075e-11	1.56144e-11	3.06365e-11	2.43778e-11	2.9481e-11	2.24031e-11	1.92425e-11	2.05639e-11	1.62105e-11	2.6824e-11	2.27466e-11	1.87737e-11	1.92608e-11	2.34786e-11	2.1745e-11	1.78617e-11	1.54321e-11	1.82478e-11	2.18569e-11
21.78	1.95365e-11	2.29536e-11	2.11898e-11	2.11898e-11	2.71019e-11	2.19763e-11	2.51581e-11	2.31966e-11	2.22961e-11	3.3166e-11	2.00065e-11	1.56171e-11	3.06348e-11	2.4382e-11	2.94825e-11	2.24067e-11	1.9246e-11	2.0573e-11	1.62062e-11	2.68123e-11	2.2744e-11	1.87701e-11	1.92662e-11	2.34739e-11	2.17402e-11	1.78718e-11	1.54093e-11	1.82476e-11	2.18534e-11
21.8	1.95417e-11	2.29535e-11	2.11922e-11	2.11922e-11	2.71056e-11	2.1981e-11	2.51523e-11	2.32029e-11	2.22904e-11	3.31709e-11	2.00065e-11	1.56208e-11	3.06315e-11	2.43843e-11	2.94866e-11	2.24027e-11	1.92433e-11	2.05703e-11	1.62127e-11	2.68031e-11	2.27439e-11	1.87712e-11	1.92641e-11	2.34798e-11	2.17408e-11	1.78766e-11	1.54262e-11	1.82472e-11	2.18521e-11
21.82	1.95286e-11	2.29539e-11	2.11947e-11	2.11947e-11	2.71066e-11	2.19885e-11	2.51578e-11	2.32069e-11	2.2294e-11	3.31731e-11	2.00119e-11	1.56178e-11	3.06316e-11	2.43796e-11	2.94862e-11	2.24062e-11	1.92408e-11	2.05686e-11	1.62123e-11	2.68237e-11	2.27438e-11	1.87727e-11	1.9262e-11	2.34738e-11	2.175e-11	1.78743e-11	1.54254e-11	1.82582e-11	2.18573e-11
21.84	1.95311e-11	2.29479e-11	2.11912e-11	2.11912e-11	2.7102e-11	2.19839e-11	2.51571e-11	2.32045e-11	2.22958e-11	3.31614e-11	2.00064e-11	1.56188e-11	3.06341e-11	2.43821e-11	2.94835e-11	2.2402e-11	1.92422e-11	2.05599e-11	1.62164e-11	2.68229e-11	2.27536e-11	1.87729e-11	1.92602e-11	2.34752e-11	2.17489e-11	1.78743e-11	1.54148e-11	1.82563e-11	2.18605e-11
21.86	1.95356e-11	2.29517e-11	2.1189e-11	2.1189e-11	2.71049e-11	2.19854e-11	2.51601e-11	2.32017e-11	2.22952e-11	3.31699e-11	2.00054e-11	1.56207e-11	3.06312e-11	2.43832e-11	2.94837e-11	2.24044e-11	1.92507e-11	2.05621e-11	1.62063e-11	2.68225e-11	2.27385e-11	1.87758e-11	1.92635e-11	2.34786e-11	2.17423e-11	1.78714e-11	1.54191e-11	1.82503e-11	2.18662e-11
21.88	1.95306e-11	2.29507e-11	2.11898e-11	2.11898e-11	2.71104e-11	2.19937e-11	2.51524e-11	2.32025e-11	2.22994e-11	3.31621e-11	2.00069e-11	1.56204e-11	3.06334e-11	2.43792e-11	2.94853e-11	2.24042e-11	1.9246e-11	2.05675e-11	1.62035e-11	2.68232e-11	2.2746e-11	1.87737e-11	1.92643e-11	2.34824e-11	2.17515e-11	1.78805e-11	1.54173e-11	1.82445e-11	2.18676e-11
21.9	1.95358e-11	2.29531e-11	2.11922e-11	2.11922e-11	2.71034e-11	2.19853e-11	2.51578e-11	2.32029e-11	2.2295e-11	3.31716e-11	2.00129e-11	1.56183e-11	3.06359e-11	2.43786e-11	2.94853e-11	2.24028e-11	1.92478e-11	2.05652e-11	1.62024e-11	2.68439e-11	2.27412e-11	1.87742e-11	1.92688e-11	2.34773e-11	2.17437e-11	1.78842e-11	1.54188e-11	1.82489e-11	2.18614e-11
21.92	1.95378e-11	2.29518e-11	2.11935e-11	2.11935e-11	2.71021e-11	2.19869e-11	2.51519e-11	2.32009e-11	2.22996e-11	3.31682e-11	2.00112e-11	1.56256e-11	3.06351e-11	2.43804e-11	2.94824e-11	2.24027e-11	1.92422e-11	2.05645e-11	1.61523e-11	2.68139e-11	2.27378e-11	1.87729e-11	1.92666e-11	2.34748e-11	2.17491e-11	1.78896e-11	1.54286e-11	1.82538e-11	2.18653e-11
21.94	1.95419e-11	2.29573e-11	2.11875e-11	2.11875e-11	2.71012e-11	2.19924e-11	2.51626e-11	2.32e-11	2.23016e-11	3.31638e-11	2.00093e-11	1.56185e-11	3.06332e-11	2.43856e-11	2.94781e-11	2.24017e-11	1.92468e-11	2.05701e-11	1.60751e-11	2.68139e-11	2.27439e-11	1.87692e-11	1.92648e-11	2.34801e-11	2.17472e-11	1.78673e-11	1.54163e-11	1.82456e-11	2.18541e-11
21.96	1.95342e-11	2.29513e-11	2.11898e-11	2.11898e-11	2.71059e-11	2.19923e-11	2.51542e-11	2.32021e-11	2.2299e-11	3.31662e-11	2.00104e-11	1.56183e-11	3.06336e-11	2.43724e-11	2.94852e-11	2.24013e-11	1.92368e-11	2.057e-11	1.60118e-11	2.68271e-11	2.27398e-11	1.87714e-11	1.92693e-11	2.34755e-11	2.17486e-11	1.78782e-11	1.54114e-11	1.82462e-11	2.18619e-11
21.98	1.95345e-11	2.29548e-11	2.11823e-11	2.11823e-11	2.71058e-11	2.19875e-11	2.51549e-11	2.31966e-11	2.2301e-11	3.31647e-11	2.00085e-11	1.56252e-11	3.06337e-11	2.43795e-11	2.94897e-11	2.24041e-11	1.92423e-11	2.05685e-11	1.59721e-11	2.68256e-11	2.2746e-11	1.87672e-11	1.92621e-11	2.3478e-11	2.17462e-11	1.78757e-11	1.54115e-11	1.82523e-11	2.18678e-11
22	1.95292e-11	2.29484e-11	2.11802e-11	2.11802e-11	2.71025e-11	2.1993e-11	2.51531e-11	2.32036e-11	2.22968e-11	3.31678e-11	2.00059e-11	1.56266e-11	3.06338e-11	2.43804e-11	2.9493e-11	2.24038e-11	1.92412e-11	2.0563e-11	1.59583e-11	2.68231e-11	2.27424e-11	1.87709e-11	1.92634e-11	2.34717e-11	2.17458e-11	1.78599e-11	1.54045e-11	1.82485e-11	2.1855e-11
22.02	1.95343e-11	2.29592e-11	2.11802e-11	2.11802e-11	2.71079e-11	2.19962e-11	2.51574e-11	2.32056e-11	2.23005e-11	3.31683e-11	2.00085e-11	1.56215e-11	3.06367e-11	2.4377e-11	2.94827e-11	2.24068e-11	1.92438e-11	2.05712e-11	1.59478e-11	2.68187e-11	2.27437e-11	1.87717e-11	1.92613e-11	2.34731e-11	2.17448e-11	1.78616e-11	1.5396e-11	1.82482e-11	2.18529e-11
22.04	1.95296e-11	2.29546e-11	2.11823e-11	2.11823e-11	2.71097e-11	2.19886e-11	2.5153e-11	2.32081e-11	2.23023e-11	3.3168e-11	2.00143e-11	1.56229e-11	3.06388e-11	2.43849e-11	2.94891e-11	2.24071e-11	1.92444e-11	2.05708e-11	1.59295e-11	2.68153e-11	2.275e-11	1.87732e-11	1.92625e-11	2.34779e-11	2.17526e-11	1.78616e-11	1.53983e-11	1.82464e-11	2.18642e-11
22.06	1.95366e-11	2.29503e-11	2.1183e-11	2.1183e-11	2.71009e-11	2.19908e-11	2.51556e-11	2.32006e-11	2.22976e-11	3.31641e-11	2.00102e-11	1.56237e-11	3.06337e-11	2.43838e-11	2.94895e-11	2.24076e-11	1.92434e-11	2.05696e-11	1.59306e-11	2.68274e-11	2.2744e-11	1.877e-11	1.92629e-11	2.3477e-11	2.175e-11	1.78701e-11	1.54072e-11	1.82513e-11	2.18623e-11
22.08	1.95288e-11	2.29547e-11	2.11829e-11	2.11829e-11	2.71067e-11	2.19943e-11	2.51579e-11	2.32026e-11	2.22987e-11	3.31661e-11	2.00055e-11	1.56268e-11	3.06385e-11	2.43882e-11	2.94854e-11	2.24021e-11	1.92422e-11	2.05737e-11	1.59228e-11	2.68159e-11	2.27415e-11	1.87738e-11	1.92652e-11	2.34794e-11	2.17471e-11	1.78668e-11	1.54005e-11	1.82522e-11	2.18645e-11
22.1	1.95305e-11	2.29524e-11	2.11816e-11	2.11816e-11	2.71031e-11	2.1993e-11	2.51497e-11	2.31995e-11	2.22969e-11	3.31615e-11	2.00125e-11	1.56311e-11	3.06383e-11	2.43833e-11	2.94817e-11	2.24064e-11	1.9246e-11	2.05699e-11	1.59274e-11	2.68167e-11	2.27507e-11	1.87738e-11	1.92608e-11	2.34759e-11	2.17496e-11	1.7869e-11	1.53938e-11	1.82492e-11	2.18677e-11
22.12	1.9528e-11	2.29452e-11	2.11761e-11	2.11761e-11	2.71016e-11	2.19949e-11	2.51499e-11	2.32048e-11	2.22942e-11	3.31642e-11	2.00118e-11	1.56295e-11	3.06383e-11	2.438e-11	2.94881e-11	2.24022e-11	1.92461e-11	2.05775e-11	1.59251e-11	2.6831e-11	2.27536e-11	1.87723e-11	1.92589e-11	2.34768e-11	2.17475e-11	1.78546e-11	1.54043e-11	1.8257e-11	2.18683e-11
22.14	1.95321e-11	2.29537e-11	2.11796e-11	2.11796e-11	2.71078e-11	2.19977e-11	2.51507e-11	2.32025e-11	2.23002e-11	3.31628e-11	2.0008e-11	1.56297e-11	3.06385e-11	2.43884e-11	2.94875e-11	2.24034e-11	1.92464e-11	2.05706e-11	1.59189e-11	2.68275e-11	2.27365e-11	1.87708e-11	1.92642e-11	2.3477e-11	2.17484e-11	1.78675e-11	1.54023e-11	1.82496e-11	2.1865e-11
22.16	1.95357e-11	2.29522e-11	2.11802e-11	2.11802e-11	2.71068e-11	2.1996e-11	2.5154e-11	2.32002e-11	2.22999e-11	3.31636e-11	2.00058e-11	1.56304e-11	3.06363e-11	2.43834e-11	2.94841e-11	2.24052e-11	1.9243e-11	2.05751e-11	1.5925e-11	2.68042e-11	2.2747e-11	1.8772e-11	1.92621e-11	2.34724e-11	2.17433e-11	1.78663e-11	1.53922e-11	1.82525e-11	2.18681e-11
22.18	1.95376e-11	2.29531e-11	2.1176e-11	2.1176e-11	2.71045e-11	2.19954e-11	2.5151e-11	2.32059e-11	2.22992e-11	3.31675e-11	2.00106e-11	1.56315e-11	3.06322e-11	2.43832e-11	2.94909e-11	2.23977e-11	1.92448e-11	2.05737e-11	1.59157e-11	2.67933e-11	2.27428e-11	1.87682e-11	1.92657e-11	2.34759e-11	2.17473e-11	1.78688e-11	1.53976e-11	1.82482e-11	2.18665e-11
22.2	1.9537e-11	2.29533e-11	2.11721e-11	2.11721e-11	2.71074e-11	2.19981e-11	2.51523e-11	2.32041e-11	2.22935e-11	3.31669e-11	2.00149e-11	1.56238e-11	3.06297e-11	2.43804e-11	2.94851e-11	2.24082e-11	1.92378e-11	2.05649e-11	1.59106e-11	2.68494e-11	2.27421e-11	1.87731e-11	1.92602e-11	2.34764e-11	2.17357e-11	1.78723e-11	1.53994e-11	1.82475e-11	2.18634e-11
22.22	1.95346e-11	2.29512e-11	2.11775e-11	2.11775e-11	2.71089e-11	2.19966e-11	2.51538e-11	2.32037e-11	2.22941e-11	3.31706e-11	2.00116e-11	1.56292e-11	3.06322e-11	2.43838e-11	2.94851e-11	2.24073e-11	1.92434e-11	2.05672e-11	1.59206e-11	2.68175e-11	2.27476e-11	1.8768e-11	1.92611e-11	2.34795e-11	2.17486e-11	1.78623e-11	1.5384e-11	1.82467e-11	2.18677e-11
22.24	1.95302e-11	2.29511e-11	2.11718e-11	2.11718e-11	2.71044e-11	2.19905e-11	2.51531e-11	2.32046e-11	2.2296e-11	3.31648e-11	2.00133e-11	1.56231e-11	3.06311e-11	2.43812e-11	2.94975e-11	2.24058e-11	1.92467e-11	2.05695e-11	1.59072e-11	2.68253e-11	2.27493e-11	1.87699e-11	1.92612e-11	2.34782e-11	2.17431e-11	1.78618e-11	1.53998e-11	1.82526e-11	2.18673e-11
22.26	1.95337e-11	2.29492e-11	2.1177e-11	2.1177e-11	2.71011e-11	2.20018e-11	2.51524e-11	2.31971e-11	2.22925e-11	3.31667e-11	2.00097e-11	1.56324e-11	3.06291e-11	2.43772e-11	2.94879e-11	2.24046e-11	1.92431e-11	2.05662e-11	1.59039e-11	2.68392e-11	2.27452e-11	1.87688e-11	1.92637e-11	2.34873e-11	2.17467e-11	1.78679e-11	1.54005e-11	1.82522e-11	2.18598e-11
22.28	1.95341e-11	2.29435e-11	2.11701e-11	2.11701e-11	2.71107e-11	2.19974e-11	2.51548e-11	2.31851e-11	2.22994e-11	3.31603e-11	2.00136e-11	1.56347e-11	3.06405e-11	2.43773e-11	2.9494e-11	2.23989e-11	1.92391e-11	2.05681e-11	1.59008e-11	2.68022e-11	2.27513e-11	1.87673e-11	1.92598e-11	2.3481e-11	2.17517e-11	1.78726e-11	1.53998e-11	1.82492e-11	2.18684e-11
22.3	1.9535e-11	2.29499e-11	2.11688e-11	2.11688e-11	2.71059e-11	2.19994e-11	2.51515e-11	2.31815e-11	2.23006e-11	3.31677e-11	2.00093e-11	1.56336e-11	3.06366e-11	2.43806e-11	2.94879e-11	2.24055e-11	1.92427e-11	2.05572e-11	1.59036e-11	2.68412e-11	2.27425e-11	1.87715e-11	1.92592e-11	2.34755e-11	2.17495e-11	1.78759e-11	1.53911e-11	1.82524e-11	2.18632e-11
22.32	1.95285e-11	2.29467e-11	2.11732e-11	2.11732e-11	2.71007e-11	2.20047e-11	2.51486e-11	2.31792e-11	2.23015e-11	3.317e-11	2.00064e-11	1.56349e-11	3.06371e-11	2.43807e-11	2.94895e-11	2.24049e-11	1.92438e-11	2.0551e-11	1.59019e-11	2.6805e-11	2.2745e-11	1.8769e-11	1.92643e-11	2.34783e-11	2.17417e-11	1.78722e-11	1.53881e-11	1.82471e-11	2.18654e-11
22.34	1.95347e-11	2.29499e-11	2.11663e-11	2.11663e-11	2.71039e-11	2.20021e-11	2.51517e-11	2.3177e-11	2.23004e-11	3.31668e-11	2.00094e-11	1.56293e-11	3.06339e-11	2.43826e-11	2.94741e-11	2.24031e-11	1.92415e-11	2.05601e-11	1.58925e-11	2.6809e-11	2.27463e-11	1.87714e-11	1.92643e-11	2.34765e-11	2.17505e-11	1.78794e-11	1.53959e-11	1.82542e-11	2.18621e-11
22.36	1.95286e-11	2.29473e-11	2.11658e-11	2.11658e-11	2.71046e-11	2.20097e-11	2.51521e-11	2.31791e-11	2.22986e-11	3.31643e-11	2.0008e-11	1.56357e-11	3.0636e-11	2.43805e-11	2.94441e-11	2.24081e-11	1.92459e-11	2.05686e-11	1.58933e-11	2.68175e-11	2.27476e-11	1.87691e-11	1.92682e-11	2.3472e-11	2.17483e-11	1.78847e-11	1.53949e-11	1.82488e-11	2.18661e-11
22.38	1.95381e-11	2.29505e-11	2.11698e-11	2.11698e-11	2.71034e-11	2.20024e-11	2.51498e-11	2.31747e-11	2.23035e-11	3.31705e-11	2.00124e-11	1.56348e-11	3.06307e-11	2.43763e-11	2.93954e-11	2.2407e-11	1.92402e-11	2.05613e-11	1.58921e-11	2.68398e-11	2.27414e-11	1.877e-11	1.92677e-11	2.3479e-11	2.17457e-11	1.78825e-11	1.53916e-11	1.8247e-11	2.18617e-11
22.4	1.95391e-11	2.2951e-11	2.11684e-11	2.11684e-11	2.71068e-11	2.20119e-11	2.51534e-11	2.3173e-11	2.23046e-11	3.31684e-11	2.00062e-11	1.56372e-11	3.0634e-11	2.43786e-11	2.93348e-11	2.24032e-11	1.92375e-11	2.0559e-11	1.58848e-11	2.68476e-11	2.2749e-11	1.87695e-11	1.92675e-11	2.34756e-11	2.17499e-11	1.78807e-11	1.53812e-11	1.82511e-11	2.18632e-11
22.42	1.95321e-11	2.29474e-11	2.11663e-11	2.11663e-11	2.71037e-11	2.19985e-11	2.51536e-11	2.31778e-11	2.22999e-11	3.31665e-11	2.00098e-11	1.56337e-11	3.06345e-11	2.43809e-11	2.92712e-11	2.24092e-11	1.92436e-11	2.05626e-11	1.58801e-11	2.6811e-11	2.27418e-11	1.87665e-11	1.92674e-11	2.34804e-11	2.1748e-11	1.78793e-11	1.53819e-11	1.8245e-11	2.18545e-11
22.44	1.95356e-11	2.29467e-11	2.11682e-11	2.11682e-11	2.71024e-11	2.20057e-11	2.51476e-11	2.31667e-11	2.22986e-11	3.31684e-11	2.00083e-11	1.56359e-11	3.06344e-11	2.43781e-11	2.92033e-11	2.24042e-11	1.92405e-11	2.05662e-11	1.58774e-11	2.68092e-11	2.27444e-11	1.87659e-11	1.92694e-11	2.34718e-11	2.17467e-11	1.78766e-11	1.53911e-11	1.82494e-11	2.1854e-11
22.46	1.95357e-11	2.29467e-11	2.11622e-11	2.11622e-11	2.71052e-11	2.20069e-11	2.51514e-11	2.31732e-11	2.23053e-11	3.31676e-11	2.00066e-11	1.56369e-11	3.06371e-11	2.43821e-11	2.91479e-11	2.24085e-11	1.92423e-11	2.05624e-11	1.58793e-11	2.6814e-11	2.27517e-11	1.87695e-11	1.92629e-11	2.34741e-11	2.175e-11	1.78633e-11	1.53853e-11	1.82413e-11	2.18535e-11
22.48	1.9529e-11	2.29536e-11	2.11607e-11	2.11607e-11	2.71042e-11	2.20062e-11	2.51537e-11	2.31756e-11	2.22992e-11	3.31684e-11	2.00089e-11	1.56422e-11	3.06411e-11	2.43771e-11	2.90905e-11	2.24073e-11	1.92384e-11	2.05677e-11	1.58797e-11	2.68145e-11	2.27499e-11	1.87692e-11	1.92611e-11	2.34824e-11	2.1747e-11	1.78785e-11	1.53856e-11	1.82515e-11	2.18637e-11
22.5	1.95343e-11	2.29494e-11	2.11659e-11	2.11659e-11	2.7105e-11	2.20041e-11	2.51618e-11	2.31715e-11	2.23011e-11	3.31639e-11	2.00096e-11	1.56381e-11	3.06386e-11	2.43773e-11	2.90467e-11	2.24051e-11	1.92413e-11	2.05618e-11	1.58594e-11	2.68112e-11	2.27435e-11	1.87692e-11	1.9264e-11	2.34764e-11	2.17483e-11	1.78592e-11	1.53895e-11	1.825e-11	2.18562e-11
22.52	1.95328e-11	2.29461e-11	2.11689e-11	2.11689e-11	2.71125e-11	2.20108e-11	2.51518e-11	2.31791e-11	2.23038e-11	3.31691e-11	2.00116e-11	1.56397e-11	3.06351e-11	2.43767e-11	2.90088e-11	2.24026e-11	1.92433e-11	2.05652e-11	1.58671e-11	2.68138e-11	2.27383e-11	1.8774e-11	1.92604e-11	2.34809e-11	2.17412e-11	1.78705e-11	1.53881e-11	1.82493e-11	2.18663e-11
22.54	1.95329e-11	2.29492e-11	2.11618e-11	2.11618e-11	2.71042e-11	2.20056e-11	2.51617e-11	2.31753e-11	2.23067e-11	3.31651e-11	2.00136e-11	1.56396e-11	3.06383e-11	2.43742e-11	2.89858e-11	2.24072e-11	1.92509e-11	2.05616e-11	1.58614e-11	2.67936e-11	2.2742e-11	1.87657e-11	1.92645e-11	2.34767e-11	2.17489e-11	1.78827e-11	1.53774e-11	1.82512e-11	2.18643e-11
22.56	1.95317e-11	2.29506e-11	2.11613e-11	2.11613e-11	2.70998e-11	2.2016e-11	2.51528e-11	2.31759e-11	2.23045e-11	3.31631e-11	2.00109e-11	1.56414e-11	3.06376e-11	2.43807e-11	2.89608e-11	2.24038e-11	1.92462e-11	2.05613e-11	1.58579e-11	2.67987e-11	2.27482e-11	1.87691e-11	1.92694e-11	2.34758e-11	2.17474e-11	1.7864e-11	1.53889e-11	1.82492e-11	2.18688e-11
[truncated: 10,023 more rows]
