# Supplementary material for: A label-free approach to detect ligand binding to cell surface proteins in real time
Source: eLife journal article supplement (doi:10.7554/elife.34944), 2018-04-26
Supplement: supp [file Fig5h.xlsx]

## Sheet: Sheet1
	Cm(F)
Time (s)	16930044-048.abf_sec50-60	16930068-073.abf_sec75-105	16930091-095.abf_sec135-148	16930116-120.abf_sec130-160	16930168-175.abf_sec86-115	16617024-027.abf_60-78	16617042-044.abf_65-95	16618022.abf	16618050-054.abf_sec90-118	17n02028-049.abf_sec681-834	17n02052-069.abf_sec680-800	17n02071-103.abf_sec678-806	17n02105-120.abf_sec660-799	17n02122-154.abf_sec676-827	17n02156-171.abf_sec678-799	17n02173-187.abf_sec270-380	17n02189-205.abf_sec700-748	17n06002-027.abf_sec990-1120	17n06071-085.abf_sec500-650
0.02	1.57211e-11	1.64916e-11	2.03698e-11	1.72469e-11	1.73386e-11	2.16197e-11	1.96836e-11	1.32405e-11	1.82462e-11	2.4045e-11	1.7871e-11	3.81776e-11	1.73049e-11	2.19283e-11	1.90192e-11	1.86552e-11	2.11181e-11	1.8397e-11	2.1848e-11
0.04	1.57227e-11	1.64943e-11	2.03679e-11	1.72466e-11	1.73366e-11	2.16264e-11	1.9666e-11	1.32396e-11	1.8247e-11	2.40534e-11	1.78661e-11	3.81763e-11	1.73073e-11	2.19305e-11	1.90184e-11	1.86554e-11	2.11068e-11	1.83951e-11	2.18485e-11
0.06	1.57222e-11	1.64985e-11	2.03709e-11	1.72478e-11	1.73343e-11	2.16196e-11	1.96889e-11	1.3241e-11	1.82513e-11	2.40482e-11	1.78737e-11	3.81774e-11	1.73049e-11	2.19314e-11	1.90195e-11	1.86559e-11	2.11124e-11	1.84027e-11	2.18498e-11
0.08	1.57265e-11	1.6506e-11	2.03702e-11	1.7249e-11	1.73373e-11	2.16223e-11	1.96941e-11	1.32453e-11	1.82496e-11	2.40486e-11	1.78697e-11	3.81776e-11	1.73253e-11	2.1927e-11	1.90255e-11	1.86592e-11	2.11089e-11	1.83955e-11	2.18447e-11
0.1	1.57366e-11	1.65057e-11	2.0371e-11	1.72458e-11	1.73331e-11	2.16162e-11	1.96923e-11	1.32468e-11	1.82557e-11	2.40533e-11	1.78681e-11	3.81764e-11	1.7298e-11	2.19257e-11	1.9011e-11	1.86552e-11	2.11219e-11	1.83995e-11	2.1846e-11
0.12	1.57282e-11	1.65069e-11	2.03672e-11	1.72462e-11	1.73354e-11	2.1614e-11	1.96622e-11	1.32432e-11	1.82468e-11	2.40503e-11	1.78718e-11	3.8175e-11	1.72902e-11	2.19312e-11	1.90154e-11	1.86586e-11	2.11008e-11	1.83911e-11	2.1847e-11
0.14	1.5723e-11	1.65e-11	2.03736e-11	1.72474e-11	1.73322e-11	2.16115e-11	1.9691e-11	1.3243e-11	1.82475e-11	2.40556e-11	1.7873e-11	3.81699e-11	1.73053e-11	2.19328e-11	1.90155e-11	1.86519e-11	2.1108e-11	1.84011e-11	2.18477e-11
0.16	1.57336e-11	1.64871e-11	2.03649e-11	1.72521e-11	1.73276e-11	2.16079e-11	1.96853e-11	1.32433e-11	1.82529e-11	2.4053e-11	1.78745e-11	3.81786e-11	1.73107e-11	2.19304e-11	1.90229e-11	1.86591e-11	2.10989e-11	1.83909e-11	2.18479e-11
0.18	1.57329e-11	1.65089e-11	2.03722e-11	1.72516e-11	1.73344e-11	2.16114e-11	1.96944e-11	1.32392e-11	1.82512e-11	2.4047e-11	1.78701e-11	3.8179e-11	1.72991e-11	2.19249e-11	1.90213e-11	1.86514e-11	2.11021e-11	1.83976e-11	2.18466e-11
0.2	1.57214e-11	1.65093e-11	2.03621e-11	1.72502e-11	1.73326e-11	2.1616e-11	1.96829e-11	1.32402e-11	1.8249e-11	2.40476e-11	1.78714e-11	3.81738e-11	1.73072e-11	2.19284e-11	1.90177e-11	1.86563e-11	2.11089e-11	1.83973e-11	2.18469e-11
0.22	1.5742e-11	1.65104e-11	2.03664e-11	1.72471e-11	1.73348e-11	2.16123e-11	1.96898e-11	1.32441e-11	1.82492e-11	2.40526e-11	1.78732e-11	3.81741e-11	1.73024e-11	2.19269e-11	1.90184e-11	1.86559e-11	2.11122e-11	1.83988e-11	2.18467e-11
0.24	1.57348e-11	1.65166e-11	2.03713e-11	1.72482e-11	1.73288e-11	2.16071e-11	1.96374e-11	1.32437e-11	1.82525e-11	2.40574e-11	1.78722e-11	3.81742e-11	1.73128e-11	2.19262e-11	1.90158e-11	1.86583e-11	2.11151e-11	1.83992e-11	2.18475e-11
0.26	1.57344e-11	1.65159e-11	2.03652e-11	1.72509e-11	1.73309e-11	2.16129e-11	1.96822e-11	1.32404e-11	1.82518e-11	2.40557e-11	1.78697e-11	3.81759e-11	1.72916e-11	2.19343e-11	1.90144e-11	1.86565e-11	2.11088e-11	1.84066e-11	2.1847e-11
0.28	1.57278e-11	1.65173e-11	2.03725e-11	1.72466e-11	1.73331e-11	2.16174e-11	1.96814e-11	1.32444e-11	1.82499e-11	2.40549e-11	1.78674e-11	3.81772e-11	1.73106e-11	2.19219e-11	1.90193e-11	1.86593e-11	2.11087e-11	1.83985e-11	2.18453e-11
0.3	1.5726e-11	1.65174e-11	2.03687e-11	1.72506e-11	1.73299e-11	2.16103e-11	1.96946e-11	1.32442e-11	1.82509e-11	2.40491e-11	1.787e-11	3.81619e-11	1.73143e-11	2.19257e-11	1.90121e-11	1.86606e-11	2.11091e-11	1.84019e-11	2.18468e-11
0.32	1.57299e-11	1.65153e-11	2.03641e-11	1.72447e-11	1.73236e-11	2.161e-11	1.96715e-11	1.32395e-11	1.82505e-11	2.40505e-11	1.78731e-11	3.81745e-11	1.73154e-11	2.19335e-11	1.9021e-11	1.86532e-11	2.11064e-11	1.83956e-11	2.18486e-11
0.34	1.5732e-11	1.65147e-11	2.03698e-11	1.72481e-11	1.7328e-11	2.16147e-11	1.96746e-11	1.32468e-11	1.82433e-11	2.40572e-11	1.78727e-11	3.81723e-11	1.73085e-11	2.19216e-11	1.90141e-11	1.86566e-11	2.11043e-11	1.83919e-11	2.18495e-11
0.36	1.57182e-11	1.65025e-11	2.0371e-11	1.72471e-11	1.73279e-11	2.16224e-11	1.9648e-11	1.32403e-11	1.82514e-11	2.40494e-11	1.78709e-11	3.81694e-11	1.73226e-11	2.19302e-11	1.90178e-11	1.86501e-11	2.11066e-11	1.83965e-11	2.18426e-11
0.38	1.57278e-11	1.65061e-11	2.03691e-11	1.72493e-11	1.73323e-11	2.16139e-11	1.96708e-11	1.32467e-11	1.82485e-11	2.40596e-11	1.78727e-11	3.8166e-11	1.73188e-11	2.19306e-11	1.90221e-11	1.86553e-11	2.11105e-11	1.83956e-11	2.18461e-11
0.4	1.5737e-11	1.65104e-11	2.03753e-11	1.72494e-11	1.73288e-11	2.16168e-11	1.9647e-11	1.32417e-11	1.8253e-11	2.40462e-11	1.78665e-11	3.81719e-11	1.73202e-11	2.19286e-11	1.90239e-11	1.86542e-11	2.11032e-11	1.84001e-11	2.18446e-11
0.42	1.57294e-11	1.64984e-11	2.03699e-11	1.72486e-11	1.73364e-11	2.16178e-11	1.96727e-11	1.3246e-11	1.82462e-11	2.40453e-11	1.78701e-11	3.81737e-11	1.73245e-11	2.193e-11	1.90232e-11	1.86489e-11	2.11015e-11	1.84009e-11	2.18423e-11
0.44	1.574e-11	1.65086e-11	2.03722e-11	1.72477e-11	1.73339e-11	2.16167e-11	1.96858e-11	1.32368e-11	1.82531e-11	2.40465e-11	1.78735e-11	3.81789e-11	1.73078e-11	2.19262e-11	1.90193e-11	1.86507e-11	2.11001e-11	1.83942e-11	2.18453e-11
0.46	1.57394e-11	1.6503e-11	2.03687e-11	1.72506e-11	1.73341e-11	2.16199e-11	1.96999e-11	1.32386e-11	1.82539e-11	2.40541e-11	1.78729e-11	3.81734e-11	1.73178e-11	2.19276e-11	1.90225e-11	1.86531e-11	2.11029e-11	1.83985e-11	2.18453e-11
0.48	1.57331e-11	1.65004e-11	2.03657e-11	1.72489e-11	1.73314e-11	2.16137e-11	1.9669e-11	1.32418e-11	1.82498e-11	2.4046e-11	1.78713e-11	3.81836e-11	1.73134e-11	2.19175e-11	1.90233e-11	1.86498e-11	2.11034e-11	1.83946e-11	2.18452e-11
0.5	1.57353e-11	1.65066e-11	2.03697e-11	1.72491e-11	1.73319e-11	2.16095e-11	1.96445e-11	1.32447e-11	1.8255e-11	2.40531e-11	1.78679e-11	3.8179e-11	1.73088e-11	2.19276e-11	1.90202e-11	1.86499e-11	2.11029e-11	1.84027e-11	2.18564e-11
0.52	1.5731e-11	1.65068e-11	2.03698e-11	1.72514e-11	1.73296e-11	2.16095e-11	1.96479e-11	1.32409e-11	1.82522e-11	2.40515e-11	1.78782e-11	3.81723e-11	1.73015e-11	2.19308e-11	1.9022e-11	1.86443e-11	2.10933e-11	1.84042e-11	2.18474e-11
0.54	1.57357e-11	1.65084e-11	2.03684e-11	1.72465e-11	1.73329e-11	2.16071e-11	1.96655e-11	1.32474e-11	1.82482e-11	2.40521e-11	1.78687e-11	3.81734e-11	1.73222e-11	2.1921e-11	1.90256e-11	1.86457e-11	2.11024e-11	1.84068e-11	2.18525e-11
0.56	1.57327e-11	1.65105e-11	2.03698e-11	1.72469e-11	1.73343e-11	2.15994e-11	1.96878e-11	1.32433e-11	1.82482e-11	2.40517e-11	1.78741e-11	3.81697e-11	1.7305e-11	2.19277e-11	1.90253e-11	1.8649e-11	2.10996e-11	1.8399e-11	2.185e-11
0.58	1.57347e-11	1.65018e-11	2.03705e-11	1.72495e-11	1.73364e-11	2.16068e-11	1.96793e-11	1.32425e-11	1.82502e-11	2.40577e-11	1.78696e-11	3.81703e-11	1.72854e-11	2.19324e-11	1.90173e-11	1.86445e-11	2.10932e-11	1.83967e-11	2.18462e-11
0.6	1.57221e-11	1.65009e-11	2.03678e-11	1.72508e-11	1.73309e-11	2.16029e-11	1.96694e-11	1.32406e-11	1.82474e-11	2.40558e-11	1.78716e-11	3.81711e-11	1.73053e-11	2.19287e-11	1.90177e-11	1.86483e-11	2.11054e-11	1.84042e-11	2.1847e-11
0.62	1.57177e-11	1.65083e-11	2.03713e-11	1.72466e-11	1.73364e-11	2.15994e-11	1.96677e-11	1.32455e-11	1.82464e-11	2.40495e-11	1.7872e-11	3.81789e-11	1.73045e-11	2.19342e-11	1.90119e-11	1.86454e-11	2.10989e-11	1.84012e-11	2.18435e-11
0.64	1.57293e-11	1.65013e-11	2.03734e-11	1.72541e-11	1.73349e-11	2.16066e-11	1.96688e-11	1.32434e-11	1.82472e-11	2.40547e-11	1.78705e-11	3.81729e-11	1.7323e-11	2.19296e-11	1.90179e-11	1.86505e-11	2.11043e-11	1.84024e-11	2.1843e-11
0.66	1.57301e-11	1.65136e-11	2.03649e-11	1.72498e-11	1.73348e-11	2.16059e-11	1.96559e-11	1.32479e-11	1.82514e-11	2.40541e-11	1.78716e-11	3.8166e-11	1.73128e-11	2.19364e-11	1.90167e-11	1.86466e-11	2.11114e-11	1.83984e-11	2.18406e-11
0.68	1.57256e-11	1.65013e-11	2.03678e-11	1.72489e-11	1.73356e-11	2.16048e-11	1.9655e-11	1.3244e-11	1.825e-11	2.40514e-11	1.78714e-11	3.81761e-11	1.73029e-11	2.19379e-11	1.90192e-11	1.86478e-11	2.1112e-11	1.83985e-11	2.18508e-11
0.7	1.5731e-11	1.65119e-11	2.03684e-11	1.72092e-11	1.73364e-11	2.15998e-11	1.969e-11	1.32419e-11	1.82462e-11	2.4049e-11	1.78743e-11	3.81772e-11	1.72953e-11	2.19299e-11	1.90173e-11	1.8643e-11	2.11037e-11	1.83951e-11	2.18409e-11
0.72	1.57318e-11	1.65067e-11	2.03678e-11	1.72485e-11	1.73386e-11	2.1605e-11	1.96799e-11	1.32403e-11	1.82499e-11	2.4053e-11	1.78711e-11	3.8175e-11	1.73074e-11	2.19276e-11	1.90171e-11	1.86449e-11	2.10971e-11	1.83949e-11	2.18479e-11
0.74	1.57296e-11	1.65149e-11	2.03701e-11	1.72489e-11	1.7335e-11	2.16117e-11	1.9662e-11	1.32441e-11	1.82488e-11	2.40493e-11	1.78749e-11	3.81738e-11	1.73124e-11	2.19319e-11	1.90108e-11	1.86408e-11	2.11004e-11	1.83978e-11	2.18464e-11
0.76	1.57439e-11	1.65084e-11	2.03704e-11	1.72526e-11	1.73354e-11	2.16074e-11	1.96757e-11	1.32415e-11	1.82491e-11	2.40509e-11	1.7872e-11	3.81752e-11	1.72853e-11	2.19275e-11	1.90101e-11	1.86459e-11	2.11073e-11	1.83949e-11	2.18528e-11
0.78	1.57329e-11	1.65074e-11	2.03714e-11	1.72526e-11	1.7338e-11	2.16126e-11	1.97016e-11	1.32368e-11	1.82509e-11	2.40558e-11	1.78722e-11	3.81808e-11	1.73063e-11	2.19306e-11	1.90164e-11	1.86464e-11	2.11042e-11	1.83989e-11	2.18487e-11
0.8	1.57327e-11	1.65164e-11	2.03733e-11	1.72512e-11	1.73334e-11	2.16142e-11	1.9675e-11	1.32417e-11	1.8254e-11	2.40573e-11	1.7874e-11	3.81729e-11	1.73092e-11	2.19286e-11	1.90138e-11	1.86455e-11	2.11036e-11	1.84014e-11	2.18486e-11
0.82	1.57414e-11	1.65085e-11	2.03712e-11	1.72539e-11	1.73345e-11	2.16128e-11	1.96596e-11	1.324e-11	1.82518e-11	2.40513e-11	1.78716e-11	3.81723e-11	1.73083e-11	2.19326e-11	1.90128e-11	1.86489e-11	2.11006e-11	1.83934e-11	2.18481e-11
0.84	1.57323e-11	1.65076e-11	2.03647e-11	1.72559e-11	1.73407e-11	2.16067e-11	1.96764e-11	1.32446e-11	1.82505e-11	2.40602e-11	1.78739e-11	3.81742e-11	1.73056e-11	2.19293e-11	1.90237e-11	1.86503e-11	2.11041e-11	1.83982e-11	2.18462e-11
0.86	1.57308e-11	1.65058e-11	2.03691e-11	1.72519e-11	1.73298e-11	2.16055e-11	1.96645e-11	1.32401e-11	1.82484e-11	2.40549e-11	1.78661e-11	3.817e-11	1.73088e-11	2.19294e-11	1.9019e-11	1.86458e-11	2.11106e-11	1.83968e-11	2.18457e-11
0.88	1.57421e-11	1.65029e-11	2.03722e-11	1.7249e-11	1.73329e-11	2.16121e-11	1.96673e-11	1.32409e-11	1.82473e-11	2.40543e-11	1.78741e-11	3.81728e-11	1.73096e-11	2.19322e-11	1.90202e-11	1.86455e-11	2.10988e-11	1.83991e-11	2.1852e-11
0.9	1.57306e-11	1.65042e-11	2.0362e-11	1.725e-11	1.73297e-11	2.16138e-11	1.96623e-11	1.32416e-11	1.82483e-11	2.40544e-11	1.78715e-11	3.81855e-11	1.72988e-11	2.19346e-11	1.90222e-11	1.8641e-11	2.10901e-11	1.8405e-11	2.18451e-11
0.92	1.57387e-11	1.64937e-11	2.03675e-11	1.72497e-11	1.73387e-11	2.16167e-11	1.96671e-11	1.32365e-11	1.82486e-11	2.405e-11	1.78703e-11	3.81718e-11	1.7303e-11	2.19293e-11	1.90205e-11	1.86448e-11	2.11065e-11	1.84014e-11	2.18487e-11
0.94	1.57379e-11	1.65068e-11	2.03678e-11	1.72473e-11	1.73375e-11	2.16144e-11	1.96739e-11	1.32358e-11	1.8248e-11	2.40565e-11	1.78717e-11	3.81687e-11	1.73222e-11	2.19302e-11	1.90271e-11	1.86432e-11	2.11111e-11	1.83974e-11	2.18527e-11
0.96	1.57397e-11	1.65009e-11	2.03668e-11	1.72502e-11	1.73384e-11	2.16154e-11	1.96895e-11	1.32406e-11	1.82465e-11	2.40568e-11	1.78767e-11	3.8175e-11	1.73109e-11	2.19265e-11	1.90209e-11	1.8647e-11	2.11072e-11	1.8403e-11	2.18486e-11
0.98	1.57401e-11	1.65053e-11	2.03759e-11	1.72491e-11	1.73385e-11	2.16176e-11	1.96791e-11	1.32427e-11	1.82446e-11	2.40528e-11	1.7873e-11	3.81744e-11	1.73205e-11	2.19301e-11	1.90217e-11	1.86458e-11	2.10991e-11	1.84008e-11	2.18514e-11
1	1.57384e-11	1.65009e-11	2.03719e-11	1.72479e-11	1.73395e-11	2.16222e-11	1.96734e-11	1.32403e-11	1.82465e-11	2.40603e-11	1.78695e-11	3.81789e-11	1.73213e-11	2.19338e-11	1.9013e-11	1.86522e-11	2.11083e-11	1.84002e-11	2.18472e-11
1.02	1.57347e-11	1.64981e-11	2.0367e-11	1.72501e-11	1.73365e-11	2.162e-11	1.96713e-11	1.32365e-11	1.82412e-11	2.40557e-11	1.78709e-11	3.81833e-11	1.73141e-11	2.19331e-11	1.90215e-11	1.86454e-11	2.1116e-11	1.83903e-11	2.18521e-11
1.04	1.57446e-11	1.6505e-11	2.03703e-11	1.72465e-11	1.73331e-11	2.16262e-11	1.96589e-11	1.32443e-11	1.82453e-11	2.40575e-11	1.78783e-11	3.817e-11	1.73014e-11	2.19341e-11	1.90199e-11	1.86462e-11	2.11071e-11	1.83992e-11	2.18487e-11
1.06	1.57375e-11	1.65043e-11	2.03727e-11	1.72478e-11	1.73324e-11	2.16182e-11	1.96733e-11	1.32414e-11	1.82464e-11	2.40514e-11	1.78674e-11	3.81707e-11	1.73195e-11	2.19319e-11	1.90179e-11	1.86447e-11	2.11058e-11	1.84019e-11	2.18419e-11
1.08	1.57457e-11	1.6507e-11	2.03621e-11	1.72537e-11	1.73353e-11	2.16177e-11	1.9678e-11	1.32363e-11	1.82494e-11	2.40513e-11	1.78702e-11	3.81765e-11	1.73108e-11	2.19231e-11	1.90233e-11	1.86463e-11	2.11036e-11	1.83958e-11	2.18468e-11
1.1	1.57304e-11	1.65137e-11	2.0354e-11	1.72525e-11	1.73353e-11	2.1617e-11	1.96696e-11	1.32362e-11	1.82465e-11	2.40548e-11	1.7876e-11	3.8178e-11	1.73162e-11	2.19328e-11	1.90207e-11	1.86427e-11	2.11079e-11	1.84013e-11	2.18455e-11
1.12	1.57434e-11	1.65105e-11	2.03459e-11	1.72488e-11	1.73313e-11	2.16248e-11	1.96665e-11	1.32408e-11	1.82519e-11	2.40551e-11	1.78686e-11	3.81771e-11	1.73156e-11	2.19282e-11	1.90193e-11	1.86434e-11	2.11131e-11	1.83968e-11	2.18501e-11
1.14	1.5738e-11	1.65083e-11	2.03494e-11	1.72533e-11	1.7339e-11	2.16171e-11	1.96762e-11	1.32382e-11	1.82465e-11	2.40558e-11	1.78706e-11	3.81723e-11	1.73107e-11	2.19323e-11	1.90164e-11	1.86487e-11	2.11084e-11	1.83979e-11	2.18537e-11
1.16	1.57426e-11	1.6501e-11	2.03548e-11	1.7252e-11	1.73316e-11	2.16156e-11	1.96722e-11	1.3245e-11	1.82454e-11	2.40525e-11	1.78703e-11	3.81789e-11	1.73314e-11	2.19333e-11	1.90149e-11	1.86439e-11	2.11008e-11	1.83994e-11	2.18413e-11
1.18	1.57357e-11	1.65064e-11	2.03529e-11	1.72476e-11	1.73336e-11	2.16135e-11	1.96687e-11	1.32438e-11	1.82519e-11	2.40568e-11	1.78745e-11	3.81686e-11	1.73091e-11	2.19276e-11	1.90215e-11	1.86453e-11	2.11004e-11	1.83986e-11	2.18504e-11
1.2	1.57312e-11	1.65163e-11	2.03597e-11	1.72542e-11	1.73317e-11	2.16129e-11	1.96627e-11	1.32382e-11	1.82464e-11	2.40508e-11	1.78714e-11	3.81685e-11	1.73121e-11	2.19311e-11	1.90202e-11	1.86476e-11	2.1101e-11	1.8397e-11	2.18512e-11
1.22	1.57339e-11	1.65134e-11	2.03515e-11	1.72546e-11	1.73362e-11	2.16147e-11	1.9683e-11	1.32433e-11	1.82413e-11	2.40534e-11	1.78743e-11	3.81771e-11	1.73039e-11	2.19281e-11	1.90179e-11	1.86467e-11	2.11055e-11	1.83991e-11	2.18511e-11
1.24	1.57414e-11	1.65105e-11	2.03511e-11	1.72487e-11	1.73348e-11	2.16226e-11	1.96636e-11	1.32412e-11	1.82449e-11	2.40598e-11	1.78753e-11	3.81757e-11	1.73032e-11	2.19304e-11	1.90171e-11	1.865e-11	2.11004e-11	1.84051e-11	2.18537e-11
1.26	1.57491e-11	1.65011e-11	2.03482e-11	1.72509e-11	1.73396e-11	2.16086e-11	1.96756e-11	1.32417e-11	1.82438e-11	2.405e-11	1.78767e-11	3.81704e-11	1.73046e-11	2.19338e-11	1.90138e-11	1.86519e-11	2.10946e-11	1.84054e-11	2.18513e-11
1.28	1.57502e-11	1.65058e-11	2.03532e-11	1.72501e-11	1.73413e-11	2.16113e-11	1.97002e-11	1.32433e-11	1.82459e-11	2.40562e-11	1.78724e-11	3.81802e-11	1.73109e-11	2.1933e-11	1.90128e-11	1.86461e-11	2.11113e-11	1.83964e-11	2.18441e-11
1.3	1.57468e-11	1.65081e-11	2.03499e-11	1.72483e-11	1.73295e-11	2.16231e-11	1.96521e-11	1.32451e-11	1.82454e-11	2.40559e-11	1.78729e-11	3.81802e-11	1.73221e-11	2.19307e-11	1.9022e-11	1.86467e-11	2.11067e-11	1.84086e-11	2.1849e-11
1.32	1.57403e-11	1.65042e-11	2.03508e-11	1.72548e-11	1.7336e-11	2.16269e-11	1.96858e-11	1.32418e-11	1.82473e-11	2.40581e-11	1.78722e-11	3.81819e-11	1.7298e-11	2.19233e-11	1.90146e-11	1.86484e-11	2.11009e-11	1.84013e-11	2.18395e-11
1.34	1.57451e-11	1.65106e-11	2.03546e-11	1.72512e-11	1.73379e-11	2.16198e-11	1.96607e-11	1.32434e-11	1.82466e-11	2.40584e-11	1.78776e-11	3.81702e-11	1.73172e-11	2.1931e-11	1.90132e-11	1.86494e-11	2.10989e-11	1.84022e-11	2.18477e-11
1.36	1.57416e-11	1.65122e-11	2.03569e-11	1.72499e-11	1.73376e-11	2.16172e-11	1.96673e-11	1.32391e-11	1.82432e-11	2.4052e-11	1.78693e-11	3.81776e-11	1.7302e-11	2.19274e-11	1.90124e-11	1.86521e-11	2.11062e-11	1.84021e-11	2.18406e-11
1.38	1.57525e-11	1.65045e-11	2.0354e-11	1.72487e-11	1.73423e-11	2.16188e-11	1.96737e-11	1.32399e-11	1.82494e-11	2.40558e-11	1.78741e-11	3.81755e-11	1.73112e-11	2.19297e-11	1.90176e-11	1.8646e-11	2.1112e-11	1.83959e-11	2.18449e-11
1.4	1.57514e-11	1.65145e-11	2.03512e-11	1.72461e-11	1.73349e-11	2.16064e-11	1.96631e-11	1.32424e-11	1.82529e-11	2.40572e-11	1.78628e-11	3.81771e-11	1.73141e-11	2.19294e-11	1.90058e-11	1.86517e-11	2.11096e-11	1.84005e-11	2.18513e-11
1.42	1.57511e-11	1.65136e-11	2.03496e-11	1.7245e-11	1.73377e-11	2.16017e-11	1.968e-11	1.324e-11	1.82459e-11	2.40558e-11	1.7876e-11	3.81759e-11	1.73086e-11	2.19303e-11	1.90086e-11	1.86452e-11	2.11048e-11	1.83998e-11	2.18463e-11
1.44	1.57542e-11	1.65142e-11	2.03529e-11	1.7252e-11	1.73368e-11	2.16027e-11	1.96619e-11	1.32406e-11	1.82434e-11	2.40561e-11	1.78728e-11	3.81726e-11	1.7298e-11	2.19297e-11	1.90221e-11	1.86496e-11	2.11171e-11	1.83987e-11	2.18495e-11
1.46	1.57631e-11	1.65166e-11	2.0351e-11	1.72493e-11	1.73349e-11	2.16072e-11	1.96607e-11	1.32368e-11	1.82444e-11	2.40633e-11	1.78707e-11	3.8175e-11	1.73141e-11	2.19292e-11	1.9028e-11	1.86487e-11	2.11051e-11	1.84054e-11	2.1848e-11
1.48	1.57455e-11	1.65178e-11	2.03485e-11	1.72501e-11	1.73356e-11	2.16058e-11	1.96813e-11	1.32431e-11	1.82485e-11	2.40567e-11	1.78719e-11	3.81656e-11	1.73144e-11	2.19307e-11	1.90173e-11	1.8649e-11	2.11051e-11	1.83998e-11	2.18438e-11
1.5	1.57611e-11	1.651e-11	2.03476e-11	1.72445e-11	1.73374e-11	2.1607e-11	1.968e-11	1.32409e-11	1.82544e-11	2.40583e-11	1.78751e-11	3.81671e-11	1.73167e-11	2.19275e-11	1.9023e-11	1.86493e-11	2.10989e-11	1.83948e-11	2.18504e-11
1.52	1.57545e-11	1.65176e-11	2.03492e-11	1.72487e-11	1.73431e-11	2.16077e-11	1.96708e-11	1.32392e-11	1.82498e-11	2.40553e-11	1.78754e-11	3.81721e-11	1.73112e-11	2.19339e-11	1.90208e-11	1.86435e-11	2.11113e-11	1.83976e-11	2.18495e-11
1.54	1.57534e-11	1.65015e-11	2.03508e-11	1.72511e-11	1.73338e-11	2.16157e-11	1.96785e-11	1.32356e-11	1.82493e-11	2.40585e-11	1.787e-11	3.81699e-11	1.73079e-11	2.19289e-11	1.90188e-11	1.86494e-11	2.11011e-11	1.83975e-11	2.18449e-11
1.56	1.57556e-11	1.65057e-11	2.03492e-11	1.72504e-11	1.73425e-11	2.16112e-11	1.9691e-11	1.32392e-11	1.8248e-11	2.40573e-11	1.7875e-11	3.81714e-11	1.73063e-11	2.1931e-11	1.90174e-11	1.86436e-11	2.11088e-11	1.83958e-11	2.18402e-11
1.58	1.57516e-11	1.65066e-11	2.03532e-11	1.72508e-11	1.73417e-11	2.16093e-11	1.9676e-11	1.32427e-11	1.82449e-11	2.40544e-11	1.78708e-11	3.81643e-11	1.73066e-11	2.19314e-11	1.9019e-11	1.86513e-11	2.11122e-11	1.83999e-11	2.18451e-11
1.6	1.57614e-11	1.6511e-11	2.03502e-11	1.72514e-11	1.7344e-11	2.16092e-11	1.96894e-11	1.32377e-11	1.8252e-11	2.40569e-11	1.78772e-11	3.81681e-11	1.73233e-11	2.19337e-11	1.9018e-11	1.86464e-11	2.11024e-11	1.84014e-11	2.18411e-11
1.62	1.57473e-11	1.64989e-11	2.03604e-11	1.7251e-11	1.73354e-11	2.16109e-11	1.96894e-11	1.3242e-11	1.82485e-11	2.40528e-11	1.78735e-11	3.8172e-11	1.73176e-11	2.19302e-11	1.90215e-11	1.86484e-11	2.10988e-11	1.83979e-11	2.18389e-11
1.64	1.57504e-11	1.65091e-11	2.03514e-11	1.72547e-11	1.73418e-11	2.16117e-11	1.96641e-11	1.32407e-11	1.82579e-11	2.40509e-11	1.78674e-11	3.81687e-11	1.72865e-11	2.19338e-11	1.902e-11	1.86445e-11	2.11106e-11	1.83997e-11	2.18433e-11
1.66	1.57514e-11	1.65045e-11	2.03515e-11	1.72498e-11	1.73364e-11	2.1621e-11	1.96884e-11	1.3245e-11	1.82425e-11	2.40573e-11	1.78719e-11	3.81703e-11	1.72974e-11	2.19335e-11	1.90165e-11	1.8649e-11	2.11027e-11	1.83973e-11	2.18462e-11
1.68	1.57464e-11	1.65214e-11	2.03506e-11	1.72523e-11	1.73414e-11	2.16194e-11	1.96794e-11	1.32389e-11	1.82484e-11	2.40573e-11	1.78734e-11	3.81788e-11	1.73124e-11	2.19325e-11	1.90203e-11	1.86437e-11	2.10984e-11	1.84024e-11	2.18403e-11
1.7	1.57567e-11	1.65052e-11	2.03505e-11	1.72554e-11	1.73426e-11	2.16174e-11	1.9668e-11	1.32421e-11	1.82447e-11	2.40525e-11	1.78696e-11	3.81681e-11	1.73102e-11	2.19304e-11	1.90211e-11	1.86453e-11	2.1114e-11	1.83971e-11	2.18512e-11
1.72	1.5738e-11	1.65133e-11	2.03572e-11	1.7251e-11	1.73447e-11	2.16172e-11	1.96834e-11	1.32431e-11	1.82498e-11	2.4055e-11	1.78785e-11	3.81765e-11	1.73049e-11	2.19332e-11	1.90244e-11	1.86474e-11	2.11064e-11	1.84025e-11	2.1839e-11
1.74	1.57483e-11	1.65039e-11	2.0354e-11	1.72503e-11	1.73344e-11	2.16151e-11	1.96723e-11	1.32403e-11	1.82459e-11	2.40588e-11	1.78718e-11	3.81689e-11	1.73023e-11	2.19285e-11	1.90246e-11	1.86494e-11	2.11038e-11	1.83952e-11	2.184e-11
1.76	1.5744e-11	1.65059e-11	2.03543e-11	1.72518e-11	1.73466e-11	2.16252e-11	1.96468e-11	1.32403e-11	1.82466e-11	2.4058e-11	1.78719e-11	3.81636e-11	1.73007e-11	2.19337e-11	1.90207e-11	1.86468e-11	2.11074e-11	1.83989e-11	2.18457e-11
1.78	1.57402e-11	1.65162e-11	2.03523e-11	1.72532e-11	1.73414e-11	2.1606e-11	1.967e-11	1.32404e-11	1.82443e-11	2.40575e-11	1.78778e-11	3.81772e-11	1.73025e-11	2.1934e-11	1.90252e-11	1.86543e-11	2.10997e-11	1.84011e-11	2.18406e-11
1.8	1.57446e-11	1.65129e-11	2.03563e-11	1.72504e-11	1.73401e-11	2.16086e-11	1.96576e-11	1.32417e-11	1.82491e-11	2.40542e-11	1.78714e-11	3.8181e-11	1.72928e-11	2.1932e-11	1.90226e-11	1.86404e-11	2.11013e-11	1.83972e-11	2.18434e-11
1.82	1.5736e-11	1.65099e-11	2.03475e-11	1.72529e-11	1.73369e-11	2.16063e-11	1.96775e-11	1.32422e-11	1.82492e-11	2.40565e-11	1.78699e-11	3.81738e-11	1.72983e-11	2.19306e-11	1.90227e-11	1.86464e-11	2.11011e-11	1.84042e-11	2.18548e-11
1.84	1.57454e-11	1.65077e-11	2.03509e-11	1.72545e-11	1.73466e-11	2.16151e-11	1.96298e-11	1.32343e-11	1.82434e-11	2.40525e-11	1.78736e-11	3.81749e-11	1.72995e-11	2.19302e-11	1.9015e-11	1.86437e-11	2.11056e-11	1.83963e-11	2.18467e-11
1.86	1.57483e-11	1.65089e-11	2.03413e-11	1.72486e-11	1.73374e-11	2.16105e-11	1.96732e-11	1.32424e-11	1.8247e-11	2.40537e-11	1.787e-11	3.81771e-11	1.72876e-11	2.19391e-11	1.90233e-11	1.86526e-11	2.11059e-11	1.83994e-11	2.18484e-11
1.88	1.57478e-11	1.65083e-11	2.0264e-11	1.72506e-11	1.73396e-11	2.16201e-11	1.96639e-11	1.32444e-11	1.82423e-11	2.40541e-11	1.78706e-11	3.8169e-11	1.73087e-11	2.1932e-11	1.90188e-11	1.86478e-11	2.11096e-11	1.83979e-11	2.18509e-11
1.9	1.57542e-11	1.65158e-11	2.01793e-11	1.72483e-11	1.73443e-11	2.16041e-11	1.96928e-11	1.32456e-11	1.82467e-11	2.40561e-11	1.78722e-11	3.81835e-11	1.73039e-11	2.19304e-11	1.90119e-11	1.86445e-11	2.11048e-11	1.83957e-11	2.18398e-11
1.92	1.57586e-11	1.6517e-11	2.01832e-11	1.72512e-11	1.73388e-11	2.16098e-11	1.96941e-11	1.32399e-11	1.82508e-11	2.40507e-11	1.78744e-11	3.81788e-11	1.73069e-11	2.19363e-11	1.90219e-11	1.86483e-11	2.11009e-11	1.83956e-11	2.18431e-11
1.94	1.57562e-11	1.65085e-11	2.01812e-11	1.72561e-11	1.73382e-11	2.16119e-11	1.96871e-11	1.32423e-11	1.82435e-11	2.40528e-11	1.78706e-11	3.81758e-11	1.73043e-11	2.19345e-11	1.90136e-11	1.8647e-11	2.11016e-11	1.8402e-11	2.18362e-11
1.96	1.57555e-11	1.6514e-11	2.01734e-11	1.72531e-11	1.73362e-11	2.15997e-11	1.96694e-11	1.32427e-11	1.82472e-11	2.4048e-11	1.78702e-11	3.81826e-11	1.72944e-11	2.19304e-11	1.90175e-11	1.86497e-11	2.11075e-11	1.83933e-11	2.18436e-11
1.98	1.57535e-11	1.65245e-11	2.01796e-11	1.72579e-11	1.73343e-11	2.16086e-11	1.97055e-11	1.32497e-11	1.82422e-11	2.40556e-11	1.78727e-11	3.81724e-11	1.72872e-11	2.19298e-11	1.90213e-11	1.86469e-11	2.11118e-11	1.84013e-11	2.18413e-11
2	1.57625e-11	1.65178e-11	2.01757e-11	1.72497e-11	1.73431e-11	2.16026e-11	1.97091e-11	1.3241e-11	1.82438e-11	2.40624e-11	1.78722e-11	3.81771e-11	1.73032e-11	2.19326e-11	1.90168e-11	1.86486e-11	2.11112e-11	1.84007e-11	2.18403e-11
2.02	1.57605e-11	1.65105e-11	2.0185e-11	1.7251e-11	1.73414e-11	2.16064e-11	1.96805e-11	1.32436e-11	1.82454e-11	2.40563e-11	1.78768e-11	3.81736e-11	1.73018e-11	2.19323e-11	1.9019e-11	1.86488e-11	2.11066e-11	1.84039e-11	2.18406e-11
2.04	1.57595e-11	1.65058e-11	2.01921e-11	1.72503e-11	1.73325e-11	2.16068e-11	1.97056e-11	1.32448e-11	1.82392e-11	2.40628e-11	1.78764e-11	3.81856e-11	1.73035e-11	2.19271e-11	1.90218e-11	1.86436e-11	2.11028e-11	1.83963e-11	2.18481e-11
2.06	1.57592e-11	1.65089e-11	2.01956e-11	1.72474e-11	1.7335e-11	2.15967e-11	1.96977e-11	1.32352e-11	1.82413e-11	2.40608e-11	1.78733e-11	3.81765e-11	1.72858e-11	2.19319e-11	1.90169e-11	1.86511e-11	2.11074e-11	1.8399e-11	2.1842e-11
2.08	1.57449e-11	1.65083e-11	2.02009e-11	1.72532e-11	1.73386e-11	2.16018e-11	1.96608e-11	1.32492e-11	1.82418e-11	2.40596e-11	1.78746e-11	3.81691e-11	1.72959e-11	2.19344e-11	1.90204e-11	1.86421e-11	2.1104e-11	1.83997e-11	2.18446e-11
2.1	1.57484e-11	1.65205e-11	2.01994e-11	1.72493e-11	1.73375e-11	2.1605e-11	1.96731e-11	1.32441e-11	1.82485e-11	2.40586e-11	1.78767e-11	3.81727e-11	1.72861e-11	2.19285e-11	1.90163e-11	1.86486e-11	2.11049e-11	1.83907e-11	2.18452e-11
2.12	1.57607e-11	1.65143e-11	2.02044e-11	1.72507e-11	1.73142e-11	2.16102e-11	1.96752e-11	1.32392e-11	1.82435e-11	2.40506e-11	1.78736e-11	3.81658e-11	1.72982e-11	2.19303e-11	1.90149e-11	1.86471e-11	2.11046e-11	1.83998e-11	2.18454e-11
2.14	1.57658e-11	1.65116e-11	2.01989e-11	1.72479e-11	1.73573e-11	2.16032e-11	1.96797e-11	1.32398e-11	1.82468e-11	2.40514e-11	1.78751e-11	3.81793e-11	1.73048e-11	2.19349e-11	1.90081e-11	1.86475e-11	2.11079e-11	1.83914e-11	2.18431e-11
2.16	1.57473e-11	1.65096e-11	2.02068e-11	1.72509e-11	1.73194e-11	2.16035e-11	1.96856e-11	1.32397e-11	1.82479e-11	2.40572e-11	1.7869e-11	3.81709e-11	1.73054e-11	2.19324e-11	1.90171e-11	1.86539e-11	2.11012e-11	1.83997e-11	2.18364e-11
2.18	1.57624e-11	1.65135e-11	2.02015e-11	1.72525e-11	1.72616e-11	2.16055e-11	1.96599e-11	1.32404e-11	1.82409e-11	2.40517e-11	1.78742e-11	3.81748e-11	1.72897e-11	2.19287e-11	1.90152e-11	1.86523e-11	2.11004e-11	1.83966e-11	2.18326e-11
2.2	1.57612e-11	1.65014e-11	2.02062e-11	1.72504e-11	1.7247e-11	2.16069e-11	1.96725e-11	1.32386e-11	1.82442e-11	2.405e-11	1.78759e-11	3.81724e-11	1.73109e-11	2.19359e-11	1.9013e-11	1.86453e-11	2.10993e-11	1.84021e-11	2.18358e-11
2.22	1.576e-11	1.65106e-11	2.02069e-11	1.72516e-11	1.7241e-11	2.16123e-11	1.9647e-11	1.32455e-11	1.82446e-11	2.40589e-11	1.78719e-11	3.81753e-11	1.73061e-11	2.19269e-11	1.90157e-11	1.86534e-11	2.11041e-11	1.84003e-11	2.18345e-11
2.24	1.57571e-11	1.6516e-11	2.02055e-11	1.72517e-11	1.72346e-11	2.16069e-11	1.96672e-11	1.32418e-11	1.82404e-11	2.40551e-11	1.78695e-11	3.81726e-11	1.73019e-11	2.19318e-11	1.90183e-11	1.86457e-11	2.11131e-11	1.84048e-11	2.18317e-11
2.26	1.5762e-11	1.65127e-11	2.02059e-11	1.7254e-11	1.7241e-11	2.16097e-11	1.96857e-11	1.32444e-11	1.82441e-11	2.40522e-11	1.78776e-11	3.81688e-11	1.7317e-11	2.19348e-11	1.90173e-11	1.86493e-11	2.11071e-11	1.84009e-11	2.18255e-11
2.28	1.57588e-11	1.65113e-11	2.02028e-11	1.72513e-11	1.72396e-11	2.15962e-11	1.96662e-11	1.32399e-11	1.82389e-11	2.40627e-11	1.78773e-11	3.8174e-11	1.732e-11	2.19374e-11	1.90189e-11	1.86461e-11	2.11064e-11	1.84027e-11	2.18442e-11
2.3	1.57556e-11	1.65129e-11	2.02095e-11	1.72529e-11	1.72448e-11	2.16056e-11	1.96666e-11	1.3243e-11	1.82475e-11	2.40621e-11	1.78702e-11	3.81771e-11	1.73219e-11	2.19299e-11	1.90135e-11	1.86468e-11	2.1114e-11	1.83961e-11	2.18396e-11
2.32	1.57519e-11	1.65115e-11	2.02075e-11	1.72499e-11	1.72424e-11	2.16049e-11	1.96654e-11	1.32426e-11	1.82505e-11	2.40593e-11	1.78836e-11	3.8178e-11	1.73143e-11	2.19325e-11	1.90147e-11	1.86464e-11	2.11136e-11	1.84009e-11	2.18452e-11
2.34	1.57512e-11	1.65115e-11	2.02013e-11	1.72488e-11	1.72455e-11	2.15974e-11	1.96666e-11	1.32371e-11	1.82441e-11	2.40622e-11	1.78784e-11	3.81869e-11	1.72979e-11	2.19292e-11	1.90147e-11	1.86497e-11	2.10972e-11	1.84025e-11	2.18374e-11
2.36	1.57492e-11	1.65054e-11	2.02066e-11	1.72501e-11	1.72353e-11	2.15958e-11	1.96565e-11	1.32432e-11	1.82408e-11	2.40586e-11	1.78734e-11	3.81803e-11	1.72973e-11	2.19354e-11	1.9017e-11	1.86459e-11	2.11034e-11	1.83955e-11	2.18384e-11
2.38	1.57489e-11	1.6502e-11	2.01993e-11	1.72478e-11	1.72422e-11	2.16057e-11	1.96736e-11	1.3238e-11	1.82406e-11	2.40578e-11	1.78775e-11	3.81824e-11	1.72988e-11	2.19332e-11	1.90188e-11	1.86493e-11	2.11097e-11	1.83935e-11	2.18405e-11
2.4	1.57602e-11	1.65102e-11	2.02011e-11	1.72483e-11	1.72424e-11	2.16099e-11	1.96874e-11	1.3241e-11	1.82494e-11	2.40562e-11	1.78768e-11	3.81833e-11	1.72992e-11	2.19279e-11	1.90071e-11	1.86448e-11	2.11016e-11	1.83979e-11	2.18463e-11
2.42	1.57597e-11	1.65089e-11	2.02061e-11	1.72478e-11	1.72427e-11	2.16056e-11	1.96673e-11	1.32423e-11	1.82418e-11	2.40571e-11	1.78664e-11	3.81737e-11	1.7317e-11	2.19315e-11	1.90153e-11	1.8647e-11	2.11118e-11	1.84023e-11	2.18494e-11
2.44	1.57567e-11	1.65053e-11	2.02005e-11	1.72536e-11	1.72389e-11	2.16027e-11	1.96624e-11	1.32391e-11	1.8243e-11	2.40627e-11	1.78713e-11	3.81815e-11	1.73014e-11	2.19377e-11	1.90141e-11	1.86546e-11	2.11147e-11	1.83974e-11	2.18472e-11
2.46	1.57534e-11	1.65075e-11	2.02069e-11	1.7252e-11	1.7238e-11	2.16017e-11	1.96826e-11	1.32412e-11	1.82399e-11	2.40562e-11	1.78728e-11	3.81752e-11	1.73084e-11	2.19301e-11	1.90127e-11	1.86504e-11	2.10969e-11	1.84011e-11	2.18466e-11
2.48	1.57558e-11	1.65035e-11	2.02056e-11	1.72534e-11	1.72328e-11	2.15959e-11	1.96869e-11	1.32412e-11	1.82388e-11	2.40587e-11	1.78732e-11	3.81713e-11	1.73052e-11	2.19352e-11	1.90145e-11	1.86468e-11	2.11039e-11	1.83984e-11	2.18451e-11
2.5	1.57434e-11	1.65087e-11	2.02002e-11	1.72532e-11	1.72426e-11	2.16016e-11	1.96793e-11	1.32402e-11	1.82455e-11	2.40477e-11	1.78723e-11	3.81736e-11	1.73142e-11	2.19362e-11	1.90238e-11	1.86494e-11	2.1112e-11	1.84051e-11	2.1849e-11
2.52	1.57476e-11	1.65076e-11	2.02057e-11	1.72499e-11	1.72339e-11	2.16082e-11	1.96813e-11	1.32391e-11	1.82398e-11	2.40585e-11	1.78777e-11	3.81754e-11	1.73268e-11	2.19385e-11	1.90196e-11	1.86443e-11	2.1097e-11	1.84015e-11	2.18443e-11
2.54	1.57589e-11	1.65156e-11	2.02015e-11	1.72526e-11	1.72337e-11	2.16038e-11	1.96787e-11	1.32452e-11	1.82455e-11	2.4061e-11	1.78797e-11	3.81783e-11	1.73189e-11	2.19321e-11	1.90176e-11	1.8648e-11	2.11141e-11	1.83995e-11	2.1838e-11
2.56	1.57544e-11	1.65048e-11	2.02075e-11	1.72549e-11	1.72316e-11	2.16061e-11	1.96956e-11	1.32458e-11	1.82424e-11	2.40653e-11	1.78745e-11	3.81728e-11	1.73248e-11	2.1935e-11	1.90208e-11	1.86504e-11	2.11029e-11	1.83939e-11	2.18451e-11
2.58	1.57455e-11	1.65133e-11	2.02057e-11	1.72518e-11	1.72333e-11	2.16032e-11	1.9689e-11	1.32422e-11	1.82471e-11	2.40597e-11	1.7871e-11	3.81809e-11	1.73249e-11	2.19357e-11	1.90161e-11	1.86395e-11	2.11125e-11	1.84031e-11	2.18482e-11
2.6	1.57619e-11	1.65159e-11	2.021e-11	1.72527e-11	1.72351e-11	2.1595e-11	1.96466e-11	1.32389e-11	1.82416e-11	2.40615e-11	1.78754e-11	3.8184e-11	1.73069e-11	2.19366e-11	1.90235e-11	1.86457e-11	2.11021e-11	1.83976e-11	2.1847e-11
2.62	1.57664e-11	1.65093e-11	2.01998e-11	1.72585e-11	1.72296e-11	2.16087e-11	1.96798e-11	1.32391e-11	1.8244e-11	2.40563e-11	1.78809e-11	3.81707e-11	1.73165e-11	2.1933e-11	1.90248e-11	1.8649e-11	2.11079e-11	1.84006e-11	2.18405e-11
2.64	1.57576e-11	1.65124e-11	2.02078e-11	1.72541e-11	1.7232e-11	2.16036e-11	1.96607e-11	1.32375e-11	1.82454e-11	2.40505e-11	1.78722e-11	3.81738e-11	1.72903e-11	2.19303e-11	1.90206e-11	1.86472e-11	2.10994e-11	1.8401e-11	2.18388e-11
2.66	1.57601e-11	1.65143e-11	2.02064e-11	1.72513e-11	1.72335e-11	2.1609e-11	1.9683e-11	1.32366e-11	1.82381e-11	2.40531e-11	1.78749e-11	3.81827e-11	1.7295e-11	2.193e-11	1.90192e-11	1.86481e-11	2.11007e-11	1.84019e-11	2.18482e-11
2.68	1.57572e-11	1.65055e-11	2.02083e-11	1.7251e-11	1.72351e-11	2.16037e-11	1.9664e-11	1.32412e-11	1.8248e-11	2.40665e-11	1.78695e-11	3.81763e-11	1.72998e-11	2.19309e-11	1.90239e-11	1.86454e-11	2.10976e-11	1.84008e-11	2.18424e-11
2.7	1.57558e-11	1.651e-11	2.02045e-11	1.72473e-11	1.72279e-11	2.1597e-11	1.96678e-11	1.32389e-11	1.82376e-11	2.40569e-11	1.78745e-11	3.81845e-11	1.73048e-11	2.19341e-11	1.90191e-11	1.86456e-11	2.11114e-11	1.84037e-11	2.18393e-11
2.72	1.57547e-11	1.65113e-11	2.02122e-11	1.72498e-11	1.7234e-11	2.16027e-11	1.96636e-11	1.32428e-11	1.82463e-11	2.40573e-11	1.78724e-11	3.81845e-11	1.7288e-11	2.19345e-11	1.90105e-11	1.86431e-11	2.10952e-11	1.8406e-11	2.18423e-11
2.74	1.57573e-11	1.65045e-11	2.02059e-11	1.7246e-11	1.72309e-11	2.16041e-11	1.9667e-11	1.3241e-11	1.82388e-11	2.40599e-11	1.78832e-11	3.8185e-11	1.72979e-11	2.19296e-11	1.9018e-11	1.86497e-11	2.11007e-11	1.8402e-11	2.18454e-11
2.76	1.57437e-11	1.65056e-11	2.02091e-11	1.72549e-11	1.72265e-11	2.16042e-11	1.96579e-11	1.32386e-11	1.82434e-11	2.40588e-11	1.78725e-11	3.81767e-11	1.73021e-11	2.19294e-11	1.90151e-11	1.86472e-11	2.11112e-11	1.83946e-11	2.18433e-11
2.78	1.57532e-11	1.65057e-11	2.021e-11	1.72518e-11	1.72258e-11	2.16073e-11	1.96746e-11	1.32385e-11	1.82455e-11	2.40576e-11	1.78734e-11	3.8178e-11	1.73045e-11	2.19441e-11	1.9023e-11	1.86432e-11	2.10978e-11	1.84007e-11	2.18427e-11
2.8	1.57464e-11	1.6507e-11	2.02104e-11	1.72516e-11	1.72306e-11	2.16103e-11	1.9644e-11	1.32389e-11	1.82421e-11	2.40632e-11	1.78791e-11	3.81797e-11	1.72987e-11	2.19318e-11	1.9018e-11	1.86449e-11	2.11068e-11	1.84024e-11	2.18474e-11
2.82	1.57536e-11	1.65101e-11	2.02084e-11	1.72558e-11	1.7233e-11	2.1601e-11	1.96527e-11	1.32417e-11	1.82436e-11	2.40639e-11	1.78745e-11	3.81863e-11	1.73044e-11	2.1933e-11	1.9015e-11	1.86443e-11	2.11049e-11	1.84064e-11	2.18339e-11
2.84	1.57436e-11	1.65108e-11	2.02122e-11	1.72496e-11	1.72299e-11	2.16033e-11	1.96557e-11	1.32422e-11	1.82487e-11	2.40571e-11	1.78773e-11	3.81794e-11	1.73071e-11	2.19322e-11	1.90122e-11	1.86421e-11	2.10987e-11	1.8402e-11	2.18369e-11
2.86	1.5749e-11	1.65066e-11	2.02107e-11	1.72589e-11	1.72294e-11	2.16062e-11	1.96638e-11	1.32452e-11	1.82488e-11	2.40624e-11	1.78768e-11	3.81766e-11	1.73131e-11	2.19317e-11	1.9012e-11	1.8644e-11	2.11056e-11	1.84018e-11	2.18363e-11
2.88	1.57558e-11	1.6506e-11	2.02051e-11	1.72485e-11	1.72268e-11	2.16069e-11	1.96836e-11	1.32446e-11	1.82411e-11	2.40637e-11	1.78723e-11	3.81786e-11	1.73254e-11	2.19312e-11	1.90182e-11	1.8643e-11	2.11037e-11	1.83986e-11	2.18434e-11
2.9	1.57558e-11	1.65029e-11	2.02052e-11	1.72493e-11	1.7227e-11	2.16058e-11	1.96685e-11	1.3243e-11	1.82429e-11	2.40597e-11	1.78731e-11	3.81842e-11	1.73092e-11	2.19334e-11	1.90197e-11	1.86438e-11	2.11007e-11	1.83991e-11	2.18477e-11
2.92	1.57597e-11	1.65064e-11	2.02086e-11	1.72567e-11	1.7225e-11	2.15988e-11	1.96762e-11	1.32435e-11	1.82366e-11	2.40491e-11	1.78766e-11	3.81798e-11	1.73159e-11	2.19302e-11	1.90115e-11	1.86498e-11	2.11071e-11	1.84023e-11	2.18404e-11
2.94	1.57637e-11	1.65048e-11	2.02098e-11	1.7252e-11	1.72317e-11	2.16019e-11	1.96569e-11	1.32424e-11	1.82372e-11	2.40544e-11	1.78744e-11	3.81783e-11	1.73019e-11	2.19346e-11	1.90127e-11	1.86376e-11	2.10898e-11	1.83998e-11	2.18347e-11
2.96	1.57601e-11	1.65151e-11	2.02123e-11	1.72545e-11	1.72274e-11	2.1603e-11	1.96674e-11	1.32454e-11	1.82398e-11	2.40509e-11	1.787e-11	3.8179e-11	1.73031e-11	2.19377e-11	1.90168e-11	1.86391e-11	2.11022e-11	1.84065e-11	2.18389e-11
2.98	1.57602e-11	1.65128e-11	2.02051e-11	1.72514e-11	1.7225e-11	2.16034e-11	1.96728e-11	1.32423e-11	1.8242e-11	2.40536e-11	1.78806e-11	3.81799e-11	1.72933e-11	2.19367e-11	1.90132e-11	1.86449e-11	2.10978e-11	1.83977e-11	2.18412e-11
3	1.57604e-11	1.65128e-11	2.02073e-11	1.72514e-11	1.72307e-11	2.16081e-11	1.96563e-11	1.32414e-11	1.82451e-11	2.40552e-11	1.78721e-11	3.81788e-11	1.73002e-11	2.19317e-11	1.90191e-11	1.86405e-11	2.10942e-11	1.83969e-11	2.18424e-11
3.02	1.57521e-11	1.65148e-11	2.02132e-11	1.72543e-11	1.72297e-11	2.16031e-11	1.96891e-11	1.32376e-11	1.82358e-11	2.40519e-11	1.78749e-11	3.81826e-11	1.73051e-11	2.1943e-11	1.90175e-11	1.86412e-11	2.11054e-11	1.83969e-11	2.18427e-11
3.04	1.57561e-11	1.65129e-11	2.02096e-11	1.7253e-11	1.72332e-11	2.16083e-11	1.96651e-11	1.32431e-11	1.82397e-11	2.40553e-11	1.78773e-11	3.81682e-11	1.73059e-11	2.19364e-11	1.90127e-11	1.86382e-11	2.11029e-11	1.84071e-11	2.18444e-11
3.06	1.57606e-11	1.65153e-11	2.02106e-11	1.72476e-11	1.72228e-11	2.15945e-11	1.96518e-11	1.32425e-11	1.82416e-11	2.40547e-11	1.78752e-11	3.81823e-11	1.73197e-11	2.19307e-11	1.90151e-11	1.86385e-11	2.11051e-11	1.84045e-11	2.18392e-11
3.08	1.5762e-11	1.65103e-11	2.02114e-11	1.7253e-11	1.72319e-11	2.15926e-11	1.96481e-11	1.3246e-11	1.82412e-11	2.40512e-11	1.78744e-11	3.81801e-11	1.73012e-11	2.19316e-11	1.90056e-11	1.86391e-11	2.11054e-11	1.83984e-11	2.18395e-11
3.1	1.57481e-11	1.65051e-11	2.02058e-11	1.72531e-11	1.72223e-11	2.16021e-11	1.96544e-11	1.32444e-11	1.82394e-11	2.40615e-11	1.7876e-11	3.8184e-11	1.73212e-11	2.19342e-11	1.9012e-11	1.86452e-11	2.10947e-11	1.84024e-11	2.18363e-11
3.12	1.57503e-11	1.65148e-11	2.02053e-11	1.72528e-11	1.72302e-11	2.16041e-11	1.96752e-11	1.32402e-11	1.82445e-11	2.40597e-11	1.78781e-11	3.81853e-11	1.73325e-11	2.19343e-11	1.90111e-11	1.8637e-11	2.11113e-11	1.83987e-11	2.18433e-11
3.14	1.57503e-11	1.65183e-11	2.02055e-11	1.72511e-11	1.72226e-11	2.15907e-11	1.96456e-11	1.32368e-11	1.82362e-11	2.4061e-11	1.78746e-11	3.81744e-11	1.73163e-11	2.19396e-11	1.9017e-11	1.86359e-11	2.11047e-11	1.83963e-11	2.18424e-11
3.16	1.5759e-11	1.65136e-11	2.02079e-11	1.72566e-11	1.72267e-11	2.16103e-11	1.96757e-11	1.32381e-11	1.82461e-11	2.406e-11	1.78786e-11	3.81823e-11	1.72992e-11	2.19308e-11	1.90141e-11	1.86381e-11	2.11063e-11	1.83953e-11	2.18473e-11
3.18	1.57588e-11	1.65137e-11	2.02057e-11	1.72543e-11	1.72305e-11	2.16021e-11	1.96437e-11	1.32414e-11	1.82398e-11	2.40604e-11	1.78808e-11	3.81773e-11	1.73128e-11	2.19385e-11	1.90142e-11	1.86364e-11	2.11116e-11	1.83925e-11	2.18429e-11
3.2	1.57598e-11	1.65165e-11	2.02052e-11	1.72535e-11	1.72223e-11	2.16039e-11	1.9676e-11	1.32414e-11	1.82408e-11	2.40572e-11	1.78752e-11	3.81849e-11	1.72927e-11	2.19334e-11	1.90119e-11	1.86335e-11	2.10955e-11	1.84021e-11	2.18414e-11
3.22	1.57548e-11	1.65136e-11	2.02074e-11	1.7249e-11	1.7227e-11	2.15957e-11	1.96577e-11	1.32411e-11	1.82436e-11	2.40556e-11	1.78764e-11	3.81779e-11	1.7303e-11	2.19363e-11	1.90102e-11	1.86383e-11	2.10933e-11	1.8403e-11	2.18383e-11
3.24	1.57545e-11	1.65187e-11	2.02e-11	1.72539e-11	1.72251e-11	2.16031e-11	1.9654e-11	1.32385e-11	1.82406e-11	2.40565e-11	1.78761e-11	3.81819e-11	1.73143e-11	2.19289e-11	1.90194e-11	1.86429e-11	2.11024e-11	1.8398e-11	2.18447e-11
3.26	1.57603e-11	1.65166e-11	2.02045e-11	1.72516e-11	1.72245e-11	2.15966e-11	1.96743e-11	1.32404e-11	1.82399e-11	2.40571e-11	1.78762e-11	3.81822e-11	1.73255e-11	2.19295e-11	1.90277e-11	1.86366e-11	2.11063e-11	1.83987e-11	2.18482e-11
3.28	1.57546e-11	1.65111e-11	2.02054e-11	1.72469e-11	1.72215e-11	2.15978e-11	1.96638e-11	1.32432e-11	1.82432e-11	2.40567e-11	1.78773e-11	3.81887e-11	1.73111e-11	2.19367e-11	1.90227e-11	1.86363e-11	2.11023e-11	1.84009e-11	2.18509e-11
3.3	1.57574e-11	1.65119e-11	2.02033e-11	1.72482e-11	1.72211e-11	2.15963e-11	1.96589e-11	1.32448e-11	1.82408e-11	2.40572e-11	1.78746e-11	3.81739e-11	1.73124e-11	2.19336e-11	1.90188e-11	1.86329e-11	2.1101e-11	1.84022e-11	2.18504e-11
3.32	1.57649e-11	1.65099e-11	2.02085e-11	1.72499e-11	1.72222e-11	2.16007e-11	1.968e-11	1.3245e-11	1.82408e-11	2.40573e-11	1.78751e-11	3.81708e-11	1.72948e-11	2.19368e-11	1.90248e-11	1.86384e-11	2.10947e-11	1.84036e-11	2.18483e-11
3.34	1.57597e-11	1.65105e-11	2.02048e-11	1.72499e-11	1.72213e-11	2.15985e-11	1.96581e-11	1.32435e-11	1.82396e-11	2.4052e-11	1.78805e-11	3.81804e-11	1.7309e-11	2.19319e-11	1.90153e-11	1.86375e-11	2.10979e-11	1.8398e-11	2.18434e-11
3.36	1.57594e-11	1.6508e-11	2.02027e-11	1.7248e-11	1.72163e-11	2.16034e-11	1.96808e-11	1.32407e-11	1.82436e-11	2.40572e-11	1.78744e-11	3.81746e-11	1.73059e-11	2.19361e-11	1.90181e-11	1.86336e-11	2.10985e-11	1.84009e-11	2.18494e-11
3.38	1.57482e-11	1.65058e-11	2.02097e-11	1.72572e-11	1.72187e-11	2.16009e-11	1.96644e-11	1.32403e-11	1.82399e-11	2.40528e-11	1.78725e-11	3.81751e-11	1.7319e-11	2.19286e-11	1.9025e-11	1.8635e-11	2.11131e-11	1.83978e-11	2.1847e-11
3.4	1.57494e-11	1.65096e-11	2.02125e-11	1.72479e-11	1.72186e-11	2.15931e-11	1.96852e-11	1.32434e-11	1.82349e-11	2.40548e-11	1.78686e-11	3.81814e-11	1.72806e-11	2.19364e-11	1.90228e-11	1.86359e-11	2.11055e-11	1.84069e-11	2.18526e-11
3.42	1.57421e-11	1.65038e-11	2.02088e-11	1.72498e-11	1.72211e-11	2.15994e-11	1.9653e-11	1.32412e-11	1.82358e-11	2.40593e-11	1.78771e-11	3.81758e-11	1.72977e-11	2.19344e-11	1.90238e-11	1.86366e-11	2.11066e-11	1.84017e-11	2.18448e-11
3.44	1.57415e-11	1.65002e-11	2.02079e-11	1.72507e-11	1.72266e-11	2.15957e-11	1.96871e-11	1.32414e-11	1.82353e-11	2.40536e-11	1.78747e-11	3.81848e-11	1.72978e-11	2.19354e-11	1.90193e-11	1.86351e-11	2.10993e-11	1.83996e-11	2.1845e-11
3.46	1.57452e-11	1.65127e-11	2.0214e-11	1.72504e-11	1.72217e-11	2.15973e-11	1.96739e-11	1.32395e-11	1.82353e-11	2.40554e-11	1.78803e-11	3.81777e-11	1.72969e-11	2.19362e-11	1.90182e-11	1.86343e-11	2.11053e-11	1.83974e-11	2.18445e-11
3.48	1.57472e-11	1.65079e-11	2.02086e-11	1.72534e-11	1.72211e-11	2.16018e-11	1.9639e-11	1.32453e-11	1.82402e-11	2.40556e-11	1.78832e-11	3.81683e-11	1.73079e-11	2.19384e-11	1.9029e-11	1.86357e-11	2.11083e-11	1.83979e-11	2.18446e-11
3.5	1.57493e-11	1.65115e-11	2.02079e-11	1.72502e-11	1.72151e-11	2.16045e-11	1.96826e-11	1.32483e-11	1.82373e-11	2.40566e-11	1.7873e-11	3.81849e-11	1.7313e-11	2.19374e-11	1.90167e-11	1.86367e-11	2.11006e-11	1.83944e-11	2.1844e-11
3.52	1.57376e-11	1.65147e-11	2.02103e-11	1.72546e-11	1.7221e-11	2.15985e-11	1.96913e-11	1.32421e-11	1.82373e-11	2.40521e-11	1.78793e-11	3.81798e-11	1.73016e-11	2.19337e-11	1.90229e-11	1.86371e-11	2.11021e-11	1.83973e-11	2.18468e-11
3.54	1.57431e-11	1.65122e-11	2.02103e-11	1.72481e-11	1.72179e-11	2.15808e-11	1.96336e-11	1.32373e-11	1.82401e-11	2.40564e-11	1.78807e-11	3.81755e-11	1.73039e-11	2.19383e-11	1.9018e-11	1.86389e-11	2.11058e-11	1.83976e-11	2.18461e-11
3.56	1.57401e-11	1.65076e-11	2.0201e-11	1.72521e-11	1.72251e-11	2.15967e-11	1.96746e-11	1.32439e-11	1.82428e-11	2.40568e-11	1.78778e-11	3.81776e-11	1.73093e-11	2.19345e-11	1.90222e-11	1.86332e-11	2.11003e-11	1.84009e-11	2.18522e-11
3.58	1.57442e-11	1.65023e-11	2.0211e-11	1.72484e-11	1.72268e-11	2.15971e-11	1.96689e-11	1.32436e-11	1.82405e-11	2.40558e-11	1.78748e-11	3.81759e-11	1.73028e-11	2.19436e-11	1.90216e-11	1.86319e-11	2.11045e-11	1.84004e-11	2.18465e-11
3.6	1.57371e-11	1.6508e-11	2.02053e-11	1.72501e-11	1.72189e-11	2.1603e-11	1.96379e-11	1.32414e-11	1.82382e-11	2.4062e-11	1.78791e-11	3.81806e-11	1.73054e-11	2.19325e-11	1.90234e-11	1.86312e-11	2.10994e-11	1.84047e-11	2.18472e-11
3.62	1.57509e-11	1.65126e-11	2.02175e-11	1.72537e-11	1.72201e-11	2.16077e-11	1.96688e-11	1.32403e-11	1.82436e-11	2.40669e-11	1.78767e-11	3.81791e-11	1.7299e-11	2.19343e-11	1.90221e-11	1.86332e-11	2.11069e-11	1.8398e-11	2.18515e-11
3.64	1.57539e-11	1.65063e-11	2.0209e-11	1.72546e-11	1.72169e-11	2.16047e-11	1.96628e-11	1.32367e-11	1.82411e-11	2.406e-11	1.78803e-11	3.81752e-11	1.72956e-11	2.19361e-11	1.90201e-11	1.8636e-11	2.11027e-11	1.84015e-11	2.18433e-11
3.66	1.5748e-11	1.65141e-11	2.02069e-11	1.7248e-11	1.72198e-11	2.15965e-11	1.96861e-11	1.32401e-11	1.82383e-11	2.40566e-11	1.78754e-11	3.81749e-11	1.73108e-11	2.19356e-11	1.90196e-11	1.86286e-11	2.11001e-11	1.84008e-11	2.18555e-11
3.68	1.57579e-11	1.65079e-11	2.02142e-11	1.72455e-11	1.72262e-11	2.16056e-11	1.96613e-11	1.32412e-11	1.82435e-11	2.40574e-11	1.78726e-11	3.81736e-11	1.73343e-11	2.19321e-11	1.90287e-11	1.8631e-11	2.11122e-11	1.84029e-11	2.18518e-11
3.7	1.57604e-11	1.65137e-11	2.02133e-11	1.72542e-11	1.72251e-11	2.16089e-11	1.96639e-11	1.3242e-11	1.8239e-11	2.40601e-11	1.78704e-11	3.81772e-11	1.73058e-11	2.19415e-11	1.90242e-11	1.86386e-11	2.1114e-11	1.83973e-11	2.18479e-11
3.72	1.57499e-11	1.65141e-11	2.02098e-11	1.72445e-11	1.72161e-11	2.1592e-11	1.96975e-11	1.32385e-11	1.8239e-11	2.40642e-11	1.78727e-11	3.81836e-11	1.7316e-11	2.19384e-11	1.90234e-11	1.86328e-11	2.10995e-11	1.83993e-11	2.18489e-11
3.74	1.57577e-11	1.65172e-11	2.02137e-11	1.72503e-11	1.72232e-11	2.15945e-11	1.96705e-11	1.3242e-11	1.82405e-11	2.40629e-11	1.78735e-11	3.8183e-11	1.73144e-11	2.19298e-11	1.90171e-11	1.86351e-11	2.11e-11	1.84038e-11	2.18365e-11
3.76	1.57454e-11	1.65119e-11	2.02118e-11	1.72562e-11	1.72284e-11	2.16044e-11	1.96898e-11	1.32386e-11	1.82458e-11	2.40615e-11	1.7869e-11	3.81872e-11	1.73082e-11	2.19354e-11	1.90319e-11	1.86341e-11	2.1107e-11	1.83983e-11	2.1839e-11
3.78	1.57544e-11	1.65157e-11	2.02142e-11	1.7254e-11	1.72192e-11	2.16001e-11	1.96692e-11	1.32356e-11	1.82442e-11	2.40655e-11	1.78736e-11	3.81826e-11	1.73157e-11	2.19375e-11	1.90172e-11	1.86332e-11	2.11086e-11	1.83979e-11	2.1839e-11
3.8	1.57589e-11	1.65106e-11	2.02096e-11	1.72544e-11	1.7222e-11	2.16011e-11	1.96801e-11	1.32369e-11	1.82411e-11	2.4053e-11	1.78754e-11	3.81871e-11	1.73057e-11	2.19336e-11	1.90245e-11	1.86334e-11	2.11023e-11	1.83979e-11	2.18425e-11
3.82	1.57549e-11	1.65198e-11	2.0209e-11	1.72522e-11	1.72178e-11	2.15942e-11	1.96732e-11	1.32381e-11	1.82411e-11	2.40525e-11	1.78725e-11	3.81777e-11	1.7314e-11	2.19328e-11	1.9024e-11	1.86327e-11	2.11075e-11	1.83973e-11	2.1845e-11
3.84	1.57401e-11	1.65121e-11	2.02125e-11	1.7251e-11	1.72212e-11	2.16053e-11	1.96679e-11	1.32397e-11	1.8237e-11	2.40556e-11	1.78721e-11	3.81736e-11	1.7317e-11	2.19368e-11	1.90233e-11	1.86371e-11	2.11046e-11	1.8398e-11	2.18378e-11
3.86	1.57418e-11	1.65166e-11	2.02073e-11	1.72521e-11	1.72225e-11	2.15984e-11	1.96567e-11	1.32401e-11	1.82449e-11	2.40569e-11	1.78755e-11	3.81737e-11	1.73091e-11	2.19376e-11	1.9028e-11	1.86369e-11	2.11076e-11	1.83983e-11	2.18396e-11
3.88	1.57463e-11	1.6509e-11	2.02092e-11	1.7253e-11	1.72179e-11	2.16033e-11	1.96889e-11	1.32348e-11	1.82409e-11	2.40573e-11	1.78713e-11	3.81795e-11	1.73067e-11	2.19339e-11	1.90191e-11	1.8633e-11	2.11093e-11	1.8403e-11	2.1851e-11
3.9	1.57522e-11	1.65158e-11	2.02139e-11	1.72516e-11	1.7216e-11	2.16101e-11	1.96568e-11	1.32371e-11	1.82448e-11	2.40636e-11	1.78738e-11	3.81734e-11	1.72997e-11	2.19412e-11	1.90271e-11	1.86375e-11	2.11063e-11	1.84026e-11	2.18388e-11
3.92	1.5753e-11	1.65101e-11	2.02086e-11	1.72476e-11	1.72166e-11	2.16086e-11	1.96691e-11	1.32369e-11	1.82424e-11	2.40562e-11	1.7868e-11	3.8184e-11	1.73099e-11	2.19347e-11	1.90222e-11	1.86362e-11	2.11059e-11	1.83997e-11	2.18404e-11
3.94	1.57486e-11	1.65154e-11	2.02087e-11	1.72525e-11	1.72242e-11	2.16077e-11	1.96866e-11	1.32437e-11	1.82338e-11	2.40618e-11	1.78709e-11	3.8175e-11	1.73132e-11	2.19398e-11	1.90163e-11	1.86354e-11	2.11018e-11	1.83967e-11	2.18497e-11
3.96	1.57612e-11	1.65181e-11	2.02085e-11	1.72503e-11	1.72256e-11	2.16062e-11	1.96618e-11	1.32389e-11	1.82396e-11	2.40637e-11	1.78739e-11	3.81761e-11	1.72946e-11	2.1929e-11	1.90235e-11	1.86363e-11	2.11041e-11	1.83958e-11	2.1845e-11
3.98	1.575e-11	1.65079e-11	2.02143e-11	1.72508e-11	1.7222e-11	2.16083e-11	1.96931e-11	1.32397e-11	1.82369e-11	2.40583e-11	1.7871e-11	3.81822e-11	1.73133e-11	2.19347e-11	1.90246e-11	1.86364e-11	2.11122e-11	1.83977e-11	2.18448e-11
4	1.57534e-11	1.65169e-11	2.02135e-11	1.72497e-11	1.72262e-11	2.16142e-11	1.96838e-11	1.32402e-11	1.82411e-11	2.40575e-11	1.78713e-11	3.81744e-11	1.73218e-11	2.19355e-11	1.9018e-11	1.86274e-11	2.11062e-11	1.83947e-11	2.18481e-11
4.02	1.57338e-11	1.651e-11	2.02168e-11	1.72446e-11	1.72171e-11	2.16135e-11	1.96571e-11	1.324e-11	1.82384e-11	2.40645e-11	1.78737e-11	3.8181e-11	1.73245e-11	2.19391e-11	1.90199e-11	1.86354e-11	2.11075e-11	1.84001e-11	2.184e-11
4.04	1.57458e-11	1.65029e-11	2.02114e-11	1.72499e-11	1.72204e-11	2.16117e-11	1.96926e-11	1.32434e-11	1.824e-11	2.40627e-11	1.78748e-11	3.81835e-11	1.73306e-11	2.19368e-11	1.90212e-11	1.86328e-11	2.11043e-11	1.8402e-11	2.18397e-11
4.06	1.5749e-11	1.65077e-11	2.02046e-11	1.72532e-11	1.72191e-11	2.16007e-11	1.96903e-11	1.32383e-11	1.824e-11	2.40615e-11	1.78712e-11	3.81732e-11	1.7313e-11	2.19368e-11	1.90284e-11	1.86355e-11	2.11065e-11	1.84016e-11	2.18469e-11
4.08	1.57428e-11	1.65049e-11	2.0216e-11	1.7247e-11	1.72241e-11	2.16137e-11	1.96675e-11	1.32454e-11	1.82398e-11	2.40626e-11	1.78689e-11	3.81796e-11	1.7326e-11	2.19381e-11	1.90215e-11	1.86339e-11	2.11051e-11	1.83972e-11	2.18426e-11
4.1	1.57388e-11	1.65105e-11	2.02128e-11	1.72538e-11	1.72218e-11	2.16005e-11	1.96713e-11	1.32445e-11	1.82366e-11	2.40599e-11	1.78657e-11	3.81776e-11	1.73106e-11	2.19389e-11	1.90171e-11	1.86352e-11	2.11041e-11	1.83958e-11	2.18459e-11
4.12	1.57532e-11	1.6506e-11	2.02174e-11	1.72478e-11	1.72208e-11	2.16011e-11	1.96755e-11	1.32352e-11	1.8234e-11	2.40654e-11	1.78697e-11	3.818e-11	1.73305e-11	2.19396e-11	1.90219e-11	1.86313e-11	2.11041e-11	1.83976e-11	2.18375e-11
4.14	1.57455e-11	1.65057e-11	2.02166e-11	1.72513e-11	1.72217e-11	2.16051e-11	1.96664e-11	1.32386e-11	1.82423e-11	2.40607e-11	1.78676e-11	3.81756e-11	1.73257e-11	2.19323e-11	1.90198e-11	1.86361e-11	2.11054e-11	1.84035e-11	2.18452e-11
4.16	1.57447e-11	1.65048e-11	2.02151e-11	1.72432e-11	1.72149e-11	2.15569e-11	1.96771e-11	1.32406e-11	1.82382e-11	2.40593e-11	1.78675e-11	3.81738e-11	1.73195e-11	2.19369e-11	1.9015e-11	1.86321e-11	2.11068e-11	1.83905e-11	2.18357e-11
4.18	1.57399e-11	1.65138e-11	2.02167e-11	1.72462e-11	1.72208e-11	2.11864e-11	1.96709e-11	1.32384e-11	1.82422e-11	2.40575e-11	1.78709e-11	3.81779e-11	1.73372e-11	2.1934e-11	1.90174e-11	1.8637e-11	2.1108e-11	1.84055e-11	2.18418e-11
4.2	1.57583e-11	1.6504e-11	2.02111e-11	1.7246e-11	1.72185e-11	2.11577e-11	1.96709e-11	1.32449e-11	1.82383e-11	2.40621e-11	1.78657e-11	3.81859e-11	1.73235e-11	2.19351e-11	1.90259e-11	1.86324e-11	2.11091e-11	1.84041e-11	2.18431e-11
4.22	1.57475e-11	1.65019e-11	2.02119e-11	1.72461e-11	1.72158e-11	2.11623e-11	1.96539e-11	1.32456e-11	1.82381e-11	2.40595e-11	1.78631e-11	3.81843e-11	1.73278e-11	2.19419e-11	1.90168e-11	1.86344e-11	2.11133e-11	1.84052e-11	2.18432e-11
4.24	1.57477e-11	1.65099e-11	2.02073e-11	1.72482e-11	1.72174e-11	2.11545e-11	1.96994e-11	1.3246e-11	1.82421e-11	2.40596e-11	1.78734e-11	3.81889e-11	1.73062e-11	2.19336e-11	1.90131e-11	1.86399e-11	2.11032e-11	1.84008e-11	2.18369e-11
4.26	1.57488e-11	1.65046e-11	2.02103e-11	1.72471e-11	1.72176e-11	2.11501e-11	1.96763e-11	1.32402e-11	1.82476e-11	2.4057e-11	1.78729e-11	3.81788e-11	1.73159e-11	2.19392e-11	1.9023e-11	1.86362e-11	2.11129e-11	1.83985e-11	2.18464e-11
4.28	1.57424e-11	1.65088e-11	2.02033e-11	1.72502e-11	1.72259e-11	2.1158e-11	1.96758e-11	1.32406e-11	1.82488e-11	2.40589e-11	1.78751e-11	3.81774e-11	1.73069e-11	2.1935e-11	1.90182e-11	1.8637e-11	2.1112e-11	1.83988e-11	2.18509e-11
4.3	1.57492e-11	1.65105e-11	2.02202e-11	1.72466e-11	1.72123e-11	2.11619e-11	1.96535e-11	1.32362e-11	1.82436e-11	2.40564e-11	1.78732e-11	3.81821e-11	1.73113e-11	2.19369e-11	1.90159e-11	1.86387e-11	2.11115e-11	1.84033e-11	2.18499e-11
4.32	1.57551e-11	1.65086e-11	2.0212e-11	1.724e-11	1.72168e-11	2.11593e-11	1.9675e-11	1.32396e-11	1.82385e-11	2.406e-11	1.787e-11	3.81916e-11	1.73251e-11	2.1935e-11	1.90165e-11	1.86357e-11	2.11137e-11	1.83998e-11	2.18508e-11
4.34	1.57513e-11	1.65086e-11	2.02143e-11	1.72441e-11	1.72116e-11	2.11621e-11	1.96894e-11	1.32386e-11	1.82391e-11	2.40648e-11	1.78698e-11	3.81789e-11	1.73216e-11	2.19352e-11	1.90198e-11	1.86291e-11	2.11062e-11	1.84055e-11	2.18373e-11
4.36	1.5757e-11	1.65073e-11	2.02097e-11	1.72437e-11	1.72188e-11	2.11675e-11	1.9685e-11	1.32439e-11	1.82438e-11	2.40554e-11	1.78721e-11	3.81884e-11	1.73109e-11	2.19352e-11	1.90138e-11	1.86345e-11	2.11083e-11	1.83987e-11	2.18398e-11
4.38	1.57611e-11	1.65142e-11	2.02131e-11	1.7246e-11	1.72124e-11	2.11695e-11	1.9649e-11	1.32388e-11	1.82363e-11	2.40644e-11	1.78747e-11	3.81944e-11	1.73152e-11	2.19323e-11	1.90216e-11	1.86296e-11	2.11111e-11	1.83985e-11	2.18425e-11
4.4	1.57507e-11	1.65129e-11	2.02148e-11	1.72433e-11	1.72138e-11	2.11658e-11	1.96555e-11	1.32398e-11	1.82409e-11	2.4059e-11	1.78713e-11	3.81829e-11	1.73094e-11	2.19375e-11	1.90217e-11	1.86354e-11	2.11051e-11	1.83976e-11	2.18526e-11
4.42	1.5761e-11	1.65112e-11	2.02076e-11	1.72439e-11	1.72148e-11	2.11584e-11	1.96712e-11	1.32388e-11	1.82401e-11	2.40644e-11	1.78729e-11	3.81775e-11	1.73415e-11	2.19405e-11	1.90227e-11	1.86327e-11	2.11087e-11	1.84001e-11	2.18486e-11
4.44	1.57617e-11	1.65089e-11	2.0212e-11	1.72466e-11	1.72216e-11	2.11586e-11	1.96757e-11	1.32403e-11	1.82449e-11	2.40632e-11	1.78734e-11	3.81871e-11	1.73311e-11	2.19355e-11	1.90208e-11	1.86265e-11	2.11031e-11	1.83985e-11	2.18432e-11
4.46	1.57609e-11	1.65138e-11	2.02128e-11	1.72482e-11	1.72182e-11	2.11606e-11	1.96829e-11	1.32404e-11	1.82404e-11	2.40604e-11	1.78704e-11	3.81796e-11	1.73188e-11	2.19395e-11	1.90186e-11	1.8633e-11	2.11072e-11	1.83969e-11	2.18423e-11
4.48	1.57659e-11	1.65072e-11	2.0215e-11	1.72473e-11	1.72208e-11	2.11642e-11	1.96632e-11	1.32448e-11	1.82429e-11	2.40461e-11	1.78723e-11	3.81825e-11	1.73201e-11	2.19394e-11	1.90179e-11	1.86375e-11	2.10975e-11	1.84047e-11	2.18462e-11
4.5	1.57601e-11	1.64974e-11	2.02074e-11	1.72435e-11	1.72195e-11	2.11542e-11	1.96574e-11	1.32388e-11	1.82423e-11	2.40593e-11	1.78752e-11	3.8176e-11	1.73196e-11	2.19365e-11	1.90271e-11	1.8631e-11	2.11012e-11	1.8405e-11	2.18466e-11
4.52	1.576e-11	1.65068e-11	2.02051e-11	1.72476e-11	1.72186e-11	2.11608e-11	1.96881e-11	1.32454e-11	1.824e-11	2.4063e-11	1.78741e-11	3.81812e-11	1.73191e-11	2.19324e-11	1.90222e-11	1.86266e-11	2.11076e-11	1.83996e-11	2.18437e-11
4.54	1.5757e-11	1.6506e-11	2.02089e-11	1.72477e-11	1.72175e-11	2.11558e-11	1.96874e-11	1.32406e-11	1.82437e-11	2.40632e-11	1.78716e-11	3.81832e-11	1.73338e-11	2.19367e-11	1.90184e-11	1.86335e-11	2.11014e-11	1.84033e-11	2.18468e-11
4.56	1.57407e-11	1.65099e-11	2.02062e-11	1.72504e-11	1.72165e-11	2.11604e-11	1.96636e-11	1.32429e-11	1.82432e-11	2.40594e-11	1.78765e-11	3.81845e-11	1.734e-11	2.19317e-11	1.90176e-11	1.86252e-11	2.11026e-11	1.83942e-11	2.18464e-11
4.58	1.57629e-11	1.65064e-11	2.02118e-11	1.72525e-11	1.72183e-11	2.11626e-11	1.97007e-11	1.3241e-11	1.8239e-11	2.40647e-11	1.78722e-11	3.81858e-11	1.73369e-11	2.1936e-11	1.90202e-11	1.86347e-11	2.11059e-11	1.84031e-11	2.18509e-11
4.6	1.57409e-11	1.65143e-11	2.02116e-11	1.72482e-11	1.72151e-11	2.11568e-11	1.96809e-11	1.32442e-11	1.82399e-11	2.4064e-11	1.78764e-11	3.81771e-11	1.73419e-11	2.19352e-11	1.90169e-11	1.86343e-11	2.11066e-11	1.84019e-11	2.18465e-11
4.62	1.5755e-11	1.65141e-11	2.02098e-11	1.72427e-11	1.7211e-11	2.11516e-11	1.96648e-11	1.32424e-11	1.82397e-11	2.40598e-11	1.78767e-11	3.81758e-11	1.73405e-11	2.19292e-11	1.90232e-11	1.86323e-11	2.1105e-11	1.84003e-11	2.18422e-11
4.64	1.57417e-11	1.6513e-11	2.02112e-11	1.7249e-11	1.7217e-11	2.11615e-11	1.96906e-11	1.32391e-11	1.8233e-11	2.40573e-11	1.78793e-11	3.81827e-11	1.73367e-11	2.19332e-11	1.90197e-11	1.86253e-11	2.11107e-11	1.84039e-11	2.18467e-11
4.66	1.57582e-11	1.65198e-11	2.02114e-11	1.72522e-11	1.72205e-11	2.11573e-11	1.96912e-11	1.32438e-11	1.82464e-11	2.4061e-11	1.7877e-11	3.81816e-11	1.73361e-11	2.19328e-11	1.90166e-11	1.8626e-11	2.11e-11	1.83944e-11	2.18438e-11
4.68	1.57499e-11	1.65148e-11	2.02142e-11	1.72465e-11	1.72141e-11	2.11609e-11	1.97062e-11	1.32434e-11	1.82398e-11	2.40627e-11	1.78725e-11	3.81807e-11	1.73239e-11	2.19405e-11	1.90191e-11	1.86249e-11	2.11076e-11	1.84007e-11	2.18444e-11
4.7	1.57559e-11	1.65095e-11	2.0212e-11	1.72554e-11	1.72157e-11	2.11522e-11	1.96671e-11	1.32404e-11	1.8243e-11	2.406e-11	1.78665e-11	3.81814e-11	1.73181e-11	2.19369e-11	1.90203e-11	1.86246e-11	2.11138e-11	1.83957e-11	2.18459e-11
4.72	1.57533e-11	1.65132e-11	2.02164e-11	1.72511e-11	1.72151e-11	2.1161e-11	1.96593e-11	1.32395e-11	1.82389e-11	2.40565e-11	1.78764e-11	3.81843e-11	1.7327e-11	2.19384e-11	1.90204e-11	1.86308e-11	2.11066e-11	1.84025e-11	2.18434e-11
4.74	1.57429e-11	1.65127e-11	2.02146e-11	1.72458e-11	1.72184e-11	2.11577e-11	1.96651e-11	1.32387e-11	1.82442e-11	2.40592e-11	1.78719e-11	3.81819e-11	1.7334e-11	2.19338e-11	1.90141e-11	1.86274e-11	2.1108e-11	1.84021e-11	2.18395e-11
4.76	1.57463e-11	1.65206e-11	2.02103e-11	1.72474e-11	1.72193e-11	2.11513e-11	1.96808e-11	1.32406e-11	1.82425e-11	2.40586e-11	1.78726e-11	3.81795e-11	1.73181e-11	2.19314e-11	1.90107e-11	1.86286e-11	2.10989e-11	1.84032e-11	2.18494e-11
4.78	1.57612e-11	1.65143e-11	2.02097e-11	1.72443e-11	1.72192e-11	2.11488e-11	1.96757e-11	1.32436e-11	1.82458e-11	2.40588e-11	1.78728e-11	3.81725e-11	1.73249e-11	2.19382e-11	1.90187e-11	1.86279e-11	2.11095e-11	1.83945e-11	2.1847e-11
4.8	1.57516e-11	1.65136e-11	2.02101e-11	1.72521e-11	1.72137e-11	2.11521e-11	1.96783e-11	1.32385e-11	1.82408e-11	2.40647e-11	1.78723e-11	3.81796e-11	1.73195e-11	2.19328e-11	1.90191e-11	1.86225e-11	2.11017e-11	1.84036e-11	2.18516e-11
4.82	1.57559e-11	1.65222e-11	2.02128e-11	1.72465e-11	1.72096e-11	2.11586e-11	1.96367e-11	1.32444e-11	1.82405e-11	2.40567e-11	1.78743e-11	3.81847e-11	1.73002e-11	2.19428e-11	1.90103e-11	1.86276e-11	2.10999e-11	1.8401e-11	2.18444e-11
4.84	1.57465e-11	1.65123e-11	2.02132e-11	1.72537e-11	1.72163e-11	2.11582e-11	1.9655e-11	1.32363e-11	1.82417e-11	2.40664e-11	1.78714e-11	3.81848e-11	1.73054e-11	2.19375e-11	1.90089e-11	1.8623e-11	2.11039e-11	1.83956e-11	2.18519e-11
4.86	1.57538e-11	1.65209e-11	2.02057e-11	1.72524e-11	1.72156e-11	2.11527e-11	1.96736e-11	1.32407e-11	1.82389e-11	2.40629e-11	1.78755e-11	3.81835e-11	1.73183e-11	2.19369e-11	1.90177e-11	1.86254e-11	2.11063e-11	1.83954e-11	2.18457e-11
4.88	1.57472e-11	1.65216e-11	2.02092e-11	1.72466e-11	1.72121e-11	2.11488e-11	1.96453e-11	1.32395e-11	1.82397e-11	2.40633e-11	1.7877e-11	3.81893e-11	1.73107e-11	2.19419e-11	1.90247e-11	1.86239e-11	2.11032e-11	1.83968e-11	2.18516e-11
4.9	1.57628e-11	1.65087e-11	2.02095e-11	1.725e-11	1.72105e-11	2.11565e-11	1.96938e-11	1.32449e-11	1.82347e-11	2.40556e-11	1.7879e-11	3.81895e-11	1.73142e-11	2.19324e-11	1.90155e-11	1.86203e-11	2.11001e-11	1.8396e-11	2.18482e-11
4.92	1.57404e-11	1.65004e-11	2.02073e-11	1.72513e-11	1.72199e-11	2.11535e-11	1.96859e-11	1.32392e-11	1.82384e-11	2.40634e-11	1.78742e-11	3.81861e-11	1.7306e-11	2.19386e-11	1.90191e-11	1.86211e-11	2.11086e-11	1.84021e-11	2.18513e-11
4.94	1.57506e-11	1.65072e-11	2.02109e-11	1.72548e-11	1.72095e-11	2.11611e-11	1.96608e-11	1.3244e-11	1.80338e-11	2.40665e-11	1.78692e-11	3.81884e-11	1.7324e-11	2.19404e-11	1.90221e-11	1.86214e-11	2.10953e-11	1.84027e-11	2.1844e-11
4.96	1.57414e-11	1.65063e-11	2.02041e-11	1.72486e-11	1.7211e-11	2.11598e-11	1.96679e-11	1.32374e-11	1.78607e-11	2.40621e-11	1.78755e-11	3.81803e-11	1.73072e-11	2.19317e-11	1.90234e-11	1.86259e-11	2.11053e-11	1.84049e-11	2.18573e-11
4.98	1.57445e-11	1.65154e-11	2.02114e-11	1.72533e-11	1.72147e-11	2.11595e-11	1.96604e-11	1.3241e-11	1.78592e-11	2.40649e-11	1.78783e-11	3.81833e-11	1.73197e-11	2.19355e-11	1.90256e-11	1.86213e-11	2.1099e-11	1.84007e-11	2.18477e-11
5	1.57495e-11	1.65108e-11	2.02125e-11	1.7256e-11	1.72108e-11	2.11512e-11	1.96703e-11	1.32439e-11	1.78612e-11	2.40539e-11	1.78748e-11	3.81842e-11	1.73187e-11	2.194e-11	1.90202e-11	1.86233e-11	2.11074e-11	1.84e-11	2.1845e-11
5.02	1.57386e-11	1.65079e-11	2.02114e-11	1.72531e-11	1.72215e-11	2.11455e-11	1.96756e-11	1.32433e-11	1.78544e-11	2.40635e-11	1.78742e-11	3.81824e-11	1.73254e-11	2.1938e-11	1.90171e-11	1.86266e-11	2.11091e-11	1.83949e-11	2.18443e-11
5.04	1.57552e-11	1.65099e-11	2.02112e-11	1.72513e-11	1.72041e-11	2.11557e-11	1.96781e-11	1.32419e-11	1.78566e-11	2.40664e-11	1.78735e-11	3.81875e-11	1.73155e-11	2.19334e-11	1.90205e-11	1.86201e-11	2.11082e-11	1.84062e-11	2.18502e-11
5.06	1.5758e-11	1.65086e-11	2.02169e-11	1.72521e-11	1.7193e-11	2.11494e-11	1.9683e-11	1.32421e-11	1.78519e-11	2.40627e-11	1.78702e-11	3.81811e-11	1.73137e-11	2.19353e-11	1.90258e-11	1.86273e-11	2.11001e-11	1.84011e-11	2.18506e-11
5.08	1.57473e-11	1.65087e-11	2.02077e-11	1.72538e-11	1.71839e-11	2.11611e-11	1.96868e-11	1.32376e-11	1.7861e-11	2.40598e-11	1.78813e-11	3.81795e-11	1.73289e-11	2.19352e-11	1.90233e-11	1.86264e-11	2.11059e-11	1.84023e-11	2.1842e-11
5.1	1.57623e-11	1.65066e-11	2.02116e-11	1.7251e-11	1.71841e-11	2.11522e-11	1.96616e-11	1.3241e-11	1.78647e-11	2.40572e-11	1.78732e-11	3.81765e-11	1.73123e-11	2.19345e-11	1.90127e-11	1.86237e-11	2.11018e-11	1.8396e-11	2.18494e-11
5.12	1.57574e-11	1.6508e-11	2.02044e-11	1.72498e-11	1.71812e-11	2.11491e-11	1.96645e-11	1.32377e-11	1.7863e-11	2.40577e-11	1.78716e-11	3.81876e-11	1.73182e-11	2.19288e-11	1.90295e-11	1.86171e-11	2.11073e-11	1.84016e-11	2.18505e-11
5.14	1.57508e-11	1.6512e-11	2.02133e-11	1.72537e-11	1.71843e-11	2.1156e-11	1.96852e-11	1.32415e-11	1.78627e-11	2.40553e-11	1.78767e-11	3.81734e-11	1.73118e-11	2.19414e-11	1.90144e-11	1.86167e-11	2.11141e-11	1.83971e-11	2.18495e-11
5.16	1.57575e-11	1.65159e-11	2.02114e-11	1.72559e-11	1.71811e-11	2.11535e-11	1.9657e-11	1.32397e-11	1.78667e-11	2.40627e-11	1.78756e-11	3.81713e-11	1.73079e-11	2.1935e-11	1.9019e-11	1.86247e-11	2.11002e-11	1.84059e-11	2.18519e-11
5.18	1.57549e-11	1.6518e-11	2.02108e-11	1.72541e-11	1.71763e-11	2.11467e-11	1.96792e-11	1.32423e-11	1.7866e-11	2.4059e-11	1.78768e-11	3.81834e-11	1.7313e-11	2.19306e-11	1.90188e-11	1.86235e-11	2.11061e-11	1.83976e-11	2.18519e-11
5.2	1.57469e-11	1.65065e-11	2.02102e-11	1.72572e-11	1.71778e-11	2.11528e-11	1.96902e-11	1.32445e-11	1.78749e-11	2.40672e-11	1.78729e-11	3.81822e-11	1.73174e-11	2.19315e-11	1.90131e-11	1.86209e-11	2.11028e-11	1.84029e-11	2.18456e-11
5.22	1.57546e-11	1.65168e-11	2.02148e-11	1.72535e-11	1.71801e-11	2.11564e-11	1.96859e-11	1.32438e-11	1.78762e-11	2.40604e-11	1.78715e-11	3.81781e-11	1.73178e-11	2.19355e-11	1.90168e-11	1.86224e-11	2.11034e-11	1.84033e-11	2.18412e-11
5.24	1.57526e-11	1.65123e-11	2.02131e-11	1.72586e-11	1.71769e-11	2.11523e-11	1.96709e-11	1.32421e-11	1.78715e-11	2.40548e-11	1.78759e-11	3.81766e-11	1.73082e-11	2.19338e-11	1.90206e-11	1.86183e-11	2.11086e-11	1.84016e-11	2.18458e-11
5.26	1.57368e-11	1.65099e-11	2.0218e-11	1.72541e-11	1.71822e-11	2.11555e-11	1.96589e-11	1.32467e-11	1.78749e-11	2.40593e-11	1.78748e-11	3.81769e-11	1.72861e-11	2.19377e-11	1.9016e-11	1.86276e-11	2.11066e-11	1.84023e-11	2.18496e-11
5.28	1.57499e-11	1.65091e-11	2.0207e-11	1.72543e-11	1.71851e-11	2.11528e-11	1.96913e-11	1.32394e-11	1.788e-11	2.40606e-11	1.78752e-11	3.81735e-11	1.72895e-11	2.19327e-11	1.90175e-11	1.86212e-11	2.11033e-11	1.84025e-11	2.18533e-11
5.3	1.576e-11	1.65107e-11	2.02136e-11	1.72561e-11	1.71818e-11	2.11604e-11	1.96832e-11	1.32413e-11	1.78843e-11	2.40703e-11	1.78713e-11	3.81817e-11	1.73108e-11	2.19282e-11	1.90172e-11	1.86255e-11	2.11054e-11	1.84012e-11	2.18536e-11
5.32	1.57594e-11	1.65052e-11	2.02136e-11	1.72545e-11	1.71801e-11	2.11558e-11	1.96895e-11	1.32458e-11	1.78824e-11	2.40668e-11	1.78738e-11	3.81718e-11	1.7303e-11	2.19452e-11	1.90116e-11	1.86231e-11	2.11113e-11	1.84011e-11	2.18497e-11
5.34	1.57524e-11	1.65118e-11	2.02137e-11	1.72525e-11	1.71829e-11	2.11461e-11	1.96835e-11	1.32404e-11	1.78822e-11	2.4065e-11	1.78695e-11	3.8181e-11	1.73031e-11	2.19319e-11	1.90074e-11	1.86208e-11	2.11053e-11	1.83988e-11	2.18488e-11
5.36	1.57513e-11	1.65097e-11	2.02177e-11	1.72544e-11	1.71755e-11	2.11479e-11	1.96796e-11	1.32371e-11	1.78875e-11	2.40686e-11	1.78774e-11	3.81736e-11	1.73128e-11	2.19426e-11	1.90089e-11	1.86198e-11	2.1104e-11	1.84025e-11	2.1846e-11
5.38	1.57575e-11	1.65065e-11	2.02175e-11	1.72543e-11	1.71736e-11	2.11614e-11	1.96458e-11	1.32373e-11	1.78917e-11	2.40626e-11	1.78823e-11	3.81747e-11	1.73143e-11	2.1935e-11	1.90191e-11	1.86234e-11	2.11002e-11	1.84067e-11	2.18583e-11
5.4	1.57549e-11	1.65031e-11	2.02175e-11	1.7257e-11	1.71797e-11	2.11536e-11	1.96364e-11	1.32378e-11	1.78913e-11	2.40638e-11	1.78787e-11	3.81793e-11	1.73292e-11	2.19361e-11	1.90161e-11	1.86177e-11	2.11139e-11	1.83997e-11	2.18549e-11
5.42	1.5755e-11	1.65001e-11	2.02188e-11	1.72562e-11	1.71771e-11	2.11558e-11	1.96648e-11	1.32431e-11	1.78919e-11	2.40634e-11	1.78761e-11	3.81754e-11	1.73286e-11	2.19335e-11	1.90241e-11	1.86162e-11	2.11088e-11	1.84001e-11	2.1854e-11
5.44	1.57478e-11	1.65032e-11	2.02092e-11	1.72574e-11	1.71818e-11	2.11481e-11	1.96715e-11	1.3244e-11	1.7891e-11	2.40647e-11	1.78794e-11	3.81774e-11	1.731e-11	2.19363e-11	1.90228e-11	1.86228e-11	2.11005e-11	1.83997e-11	2.18449e-11
5.46	1.57591e-11	1.65057e-11	2.02144e-11	1.72556e-11	1.71778e-11	2.11428e-11	1.969e-11	1.32389e-11	1.7886e-11	2.40673e-11	1.78774e-11	3.81805e-11	1.73163e-11	2.19407e-11	1.90176e-11	1.86239e-11	2.11048e-11	1.84014e-11	2.18528e-11
5.48	1.5754e-11	1.65053e-11	2.02162e-11	1.7254e-11	1.71744e-11	2.11531e-11	1.9674e-11	1.32399e-11	1.78919e-11	2.40702e-11	1.78771e-11	3.81855e-11	1.73002e-11	2.19339e-11	1.90131e-11	1.86208e-11	2.11084e-11	1.84065e-11	2.18535e-11
5.5	1.57544e-11	1.65098e-11	2.02117e-11	1.7254e-11	1.71761e-11	2.11427e-11	1.96567e-11	1.32395e-11	1.78899e-11	2.40686e-11	1.78721e-11	3.81844e-11	1.73047e-11	2.19337e-11	1.90202e-11	1.86193e-11	2.11036e-11	1.84063e-11	2.18525e-11
5.52	1.57671e-11	1.65084e-11	2.02124e-11	1.72606e-11	1.71848e-11	2.11554e-11	1.96536e-11	1.32407e-11	1.7889e-11	2.40674e-11	1.78792e-11	3.81792e-11	1.73026e-11	2.19305e-11	1.90134e-11	1.86195e-11	2.11123e-11	1.84033e-11	2.18533e-11
5.54	1.57573e-11	1.65054e-11	2.02105e-11	1.72603e-11	1.71786e-11	2.1156e-11	1.96747e-11	1.32456e-11	1.78911e-11	2.40607e-11	1.78741e-11	3.81859e-11	1.72945e-11	2.1933e-11	1.9015e-11	1.86222e-11	2.11056e-11	1.83961e-11	2.18505e-11
5.56	1.57564e-11	1.65041e-11	2.02114e-11	1.72526e-11	1.71858e-11	2.11548e-11	1.966e-11	1.32395e-11	1.78937e-11	2.40695e-11	1.78757e-11	3.81836e-11	1.7287e-11	2.19371e-11	1.9021e-11	1.86289e-11	2.10974e-11	1.83979e-11	2.18482e-11
5.58	1.57555e-11	1.65067e-11	2.02139e-11	1.7261e-11	1.71834e-11	2.11574e-11	1.96644e-11	1.3237e-11	1.78946e-11	2.40645e-11	1.78773e-11	3.81765e-11	1.72817e-11	2.19376e-11	1.90215e-11	1.8624e-11	2.11004e-11	1.84037e-11	2.18472e-11
5.6	1.57544e-11	1.65097e-11	2.02119e-11	1.72602e-11	1.71836e-11	2.11462e-11	1.96594e-11	1.32385e-11	1.78917e-11	2.40677e-11	1.78792e-11	3.81814e-11	1.72823e-11	2.19333e-11	1.90185e-11	1.86214e-11	2.10927e-11	1.83964e-11	2.18547e-11
5.62	1.57563e-11	1.65043e-11	2.02152e-11	1.72602e-11	1.7178e-11	2.11513e-11	1.96377e-11	1.3235e-11	1.78902e-11	2.40674e-11	1.7879e-11	3.81804e-11	1.72981e-11	2.19371e-11	1.90143e-11	1.86219e-11	2.10966e-11	1.83984e-11	2.18479e-11
5.64	1.57589e-11	1.6517e-11	2.02192e-11	1.72559e-11	1.71745e-11	2.11496e-11	1.96762e-11	1.32422e-11	1.7893e-11	2.4063e-11	1.78736e-11	3.81802e-11	1.7279e-11	2.19339e-11	1.90129e-11	1.8623e-11	2.11015e-11	1.84015e-11	2.18582e-11
5.66	1.57613e-11	1.65158e-11	2.02121e-11	1.72542e-11	1.71766e-11	2.11511e-11	1.96604e-11	1.32442e-11	1.79011e-11	2.40624e-11	1.78743e-11	3.81837e-11	1.72828e-11	2.194e-11	1.90145e-11	1.86207e-11	2.11053e-11	1.83957e-11	2.18523e-11
5.68	1.57573e-11	1.65055e-11	2.02142e-11	1.7257e-11	1.7177e-11	2.11471e-11	1.96731e-11	1.32404e-11	1.79011e-11	2.40643e-11	1.78801e-11	3.81834e-11	1.72864e-11	2.1932e-11	1.90096e-11	1.86237e-11	2.11042e-11	1.84003e-11	2.18463e-11
5.7	1.57655e-11	1.65127e-11	2.02156e-11	1.72606e-11	1.71845e-11	2.11524e-11	1.9663e-11	1.32422e-11	1.78955e-11	2.40546e-11	1.78744e-11	3.81794e-11	1.72834e-11	2.1936e-11	1.90145e-11	1.86238e-11	2.11062e-11	1.83993e-11	2.1853e-11
5.72	1.57534e-11	1.65101e-11	2.0209e-11	1.72604e-11	1.71781e-11	2.11507e-11	1.96467e-11	1.32356e-11	1.79046e-11	2.40589e-11	1.78804e-11	3.81852e-11	1.72924e-11	2.19403e-11	1.90176e-11	1.86209e-11	2.11008e-11	1.83969e-11	2.18498e-11
5.74	1.57466e-11	1.65181e-11	2.02132e-11	1.72574e-11	1.71867e-11	2.11514e-11	1.96697e-11	1.32391e-11	1.79025e-11	2.40613e-11	1.78781e-11	3.81874e-11	1.73019e-11	2.1941e-11	1.90116e-11	1.8623e-11	2.11148e-11	1.83974e-11	2.18498e-11
5.76	1.57522e-11	1.65143e-11	2.02161e-11	1.72565e-11	1.71798e-11	2.11481e-11	1.96736e-11	1.32406e-11	1.79007e-11	2.40642e-11	1.78768e-11	3.81769e-11	1.72905e-11	2.19341e-11	1.90138e-11	1.86255e-11	2.11072e-11	1.83988e-11	2.18519e-11
5.78	1.57439e-11	1.65201e-11	2.02181e-11	1.72608e-11	1.718e-11	2.11551e-11	1.96681e-11	1.32439e-11	1.79054e-11	2.40696e-11	1.7871e-11	3.81866e-11	1.72866e-11	2.19346e-11	1.90242e-11	1.86195e-11	2.10969e-11	1.84011e-11	2.18459e-11
5.8	1.5762e-11	1.65122e-11	2.02149e-11	1.72591e-11	1.71803e-11	2.11475e-11	1.96449e-11	1.32386e-11	1.79037e-11	2.40628e-11	1.78782e-11	3.81809e-11	1.73036e-11	2.19367e-11	1.9009e-11	1.86264e-11	2.11091e-11	1.84044e-11	2.18473e-11
5.82	1.57583e-11	1.65071e-11	2.02178e-11	1.72649e-11	1.71797e-11	2.11445e-11	1.96496e-11	1.32439e-11	1.78974e-11	2.40644e-11	1.78808e-11	3.81772e-11	1.728e-11	2.19377e-11	1.9012e-11	1.8621e-11	2.10966e-11	1.83981e-11	2.18512e-11
5.84	1.57541e-11	1.65214e-11	2.02188e-11	1.72548e-11	1.71784e-11	2.11615e-11	1.96896e-11	1.32433e-11	1.79018e-11	2.40645e-11	1.78743e-11	3.81801e-11	1.72881e-11	2.19363e-11	1.90153e-11	1.86183e-11	2.11105e-11	1.84003e-11	2.18554e-11
5.86	1.57543e-11	1.65129e-11	2.02161e-11	1.72574e-11	1.71881e-11	2.11508e-11	1.96817e-11	1.32393e-11	1.7896e-11	2.40638e-11	1.78813e-11	3.81855e-11	1.72911e-11	2.19383e-11	1.90108e-11	1.862e-11	2.11072e-11	1.84036e-11	2.18511e-11
5.88	1.57511e-11	1.65222e-11	2.02214e-11	1.72642e-11	1.71762e-11	2.11423e-11	1.96684e-11	1.32429e-11	1.79018e-11	2.40611e-11	1.78822e-11	3.8177e-11	1.72998e-11	2.19356e-11	1.90213e-11	1.86203e-11	2.11066e-11	1.83953e-11	2.18582e-11
5.9	1.576e-11	1.65174e-11	2.02156e-11	1.7253e-11	1.7183e-11	2.11488e-11	1.96761e-11	1.32357e-11	1.78984e-11	2.40635e-11	1.78796e-11	3.8182e-11	1.73144e-11	2.19404e-11	1.90211e-11	1.86238e-11	2.11039e-11	1.84002e-11	2.1853e-11
5.92	1.57583e-11	1.65091e-11	2.02218e-11	1.72562e-11	1.71827e-11	2.11447e-11	1.96806e-11	1.324e-11	1.79051e-11	2.40605e-11	1.78748e-11	3.81886e-11	1.73231e-11	2.19358e-11	1.90265e-11	1.86227e-11	2.11057e-11	1.84031e-11	2.18544e-11
5.94	1.57561e-11	1.6519e-11	2.02216e-11	1.72602e-11	1.71801e-11	2.11478e-11	1.96768e-11	1.32413e-11	1.79067e-11	2.40611e-11	1.78777e-11	3.81766e-11	1.73004e-11	2.19341e-11	1.90224e-11	1.86229e-11	2.11043e-11	1.8398e-11	2.18503e-11
5.96	1.576e-11	1.6506e-11	2.0223e-11	1.72592e-11	1.71798e-11	2.11524e-11	1.96606e-11	1.32413e-11	1.78994e-11	2.40656e-11	1.78711e-11	3.81743e-11	1.73028e-11	2.19384e-11	1.9014e-11	1.86264e-11	2.11007e-11	1.83935e-11	2.18546e-11
5.98	1.57544e-11	1.65054e-11	2.02191e-11	1.72594e-11	1.7176e-11	2.11408e-11	1.96668e-11	1.32436e-11	1.79024e-11	2.4063e-11	1.78751e-11	3.81829e-11	1.73189e-11	2.19353e-11	1.90215e-11	1.86157e-11	2.11063e-11	1.83955e-11	2.18509e-11
6	1.57542e-11	1.65112e-11	2.02146e-11	1.72583e-11	1.71817e-11	2.11479e-11	1.9656e-11	1.32398e-11	1.7903e-11	2.40611e-11	1.78753e-11	3.81786e-11	1.7314e-11	2.19367e-11	1.90236e-11	1.86226e-11	2.10965e-11	1.83988e-11	2.18566e-11
6.02	1.57605e-11	1.6507e-11	2.02141e-11	1.72597e-11	1.71735e-11	2.11418e-11	1.9656e-11	1.32334e-11	1.79059e-11	2.40612e-11	1.78758e-11	3.81769e-11	1.73174e-11	2.19425e-11	1.90237e-11	1.86224e-11	2.11061e-11	1.8401e-11	2.18506e-11
6.04	1.5757e-11	1.65045e-11	2.02162e-11	1.72533e-11	1.71744e-11	2.11491e-11	1.96463e-11	1.32435e-11	1.7905e-11	2.40656e-11	1.78772e-11	3.81767e-11	1.73262e-11	2.19319e-11	1.90134e-11	1.86258e-11	2.11074e-11	1.83998e-11	2.18521e-11
6.06	1.57461e-11	1.65011e-11	2.02133e-11	1.72611e-11	1.71768e-11	2.11399e-11	1.9667e-11	1.3242e-11	1.78988e-11	2.40601e-11	1.78745e-11	3.81833e-11	1.7308e-11	2.19345e-11	1.90176e-11	1.8623e-11	2.1106e-11	1.83985e-11	2.18507e-11
6.08	1.57589e-11	1.65053e-11	2.02099e-11	1.72613e-11	1.71766e-11	2.11462e-11	1.96867e-11	1.32398e-11	1.7908e-11	2.40646e-11	1.787e-11	3.81805e-11	1.73282e-11	2.19353e-11	1.90214e-11	1.86248e-11	2.11064e-11	1.84027e-11	2.18559e-11
6.1	1.57488e-11	1.65051e-11	2.02157e-11	1.72575e-11	1.718e-11	2.11577e-11	1.96836e-11	1.32392e-11	1.79039e-11	2.40631e-11	1.7874e-11	3.8176e-11	1.73227e-11	2.19323e-11	1.90173e-11	1.86216e-11	2.1098e-11	1.83995e-11	2.1854e-11
6.12	1.57576e-11	1.65018e-11	2.02206e-11	1.72656e-11	1.71736e-11	2.11509e-11	1.9691e-11	1.32384e-11	1.79044e-11	2.40675e-11	1.78757e-11	3.81773e-11	1.73204e-11	2.19321e-11	1.9018e-11	1.86254e-11	2.11057e-11	1.84003e-11	2.18527e-11
6.14	1.57659e-11	1.65102e-11	2.0212e-11	1.72588e-11	1.71819e-11	2.11518e-11	1.96945e-11	1.32455e-11	1.78997e-11	2.40651e-11	1.78751e-11	3.81848e-11	1.73109e-11	2.19326e-11	1.9018e-11	1.86221e-11	2.11051e-11	1.84015e-11	2.18587e-11
6.16	1.57634e-11	1.65204e-11	2.02218e-11	1.72642e-11	1.71753e-11	2.11597e-11	1.96625e-11	1.32472e-11	1.79059e-11	2.40676e-11	1.78775e-11	3.81868e-11	1.73257e-11	2.19311e-11	1.90209e-11	1.86209e-11	2.11023e-11	1.83971e-11	2.18546e-11
6.18	1.57529e-11	1.65251e-11	2.02183e-11	1.72618e-11	1.71732e-11	2.1149e-11	1.96826e-11	1.32425e-11	1.79012e-11	2.4066e-11	1.78736e-11	3.81857e-11	1.73194e-11	2.19354e-11	1.90097e-11	1.86254e-11	2.11079e-11	1.83996e-11	2.18506e-11
6.2	1.57557e-11	1.65163e-11	2.02164e-11	1.72563e-11	1.71794e-11	2.11644e-11	1.96503e-11	1.32429e-11	1.79017e-11	2.40656e-11	1.78799e-11	3.81757e-11	1.73287e-11	2.19312e-11	1.90157e-11	1.86249e-11	2.11058e-11	1.84032e-11	2.18551e-11
6.22	1.57612e-11	1.65164e-11	2.02152e-11	1.7262e-11	1.71787e-11	2.11592e-11	1.96631e-11	1.32348e-11	1.79091e-11	2.40626e-11	1.78724e-11	3.81769e-11	1.73286e-11	2.19307e-11	1.90123e-11	1.86235e-11	2.11033e-11	1.83974e-11	2.18503e-11
6.24	1.57622e-11	1.65176e-11	2.02221e-11	1.72646e-11	1.71827e-11	2.11562e-11	1.96834e-11	1.32388e-11	1.79036e-11	2.40688e-11	1.78745e-11	3.8178e-11	1.73136e-11	2.19377e-11	1.90124e-11	1.86197e-11	2.1097e-11	1.83931e-11	2.18532e-11
6.26	1.57692e-11	1.65165e-11	2.02178e-11	1.72596e-11	1.71738e-11	2.11559e-11	1.96781e-11	1.32388e-11	1.79039e-11	2.4071e-11	1.78784e-11	3.81852e-11	1.7324e-11	2.19334e-11	1.90169e-11	1.86263e-11	2.11076e-11	1.84011e-11	2.1854e-11
6.28	1.57562e-11	1.65064e-11	2.02203e-11	1.72628e-11	1.71812e-11	2.11562e-11	1.96743e-11	1.32407e-11	1.79084e-11	2.4068e-11	1.78834e-11	3.81831e-11	1.73352e-11	2.19317e-11	1.90161e-11	1.8619e-11	2.11074e-11	1.84026e-11	2.18481e-11
6.3	1.57559e-11	1.65015e-11	2.02217e-11	1.72591e-11	1.718e-11	2.11518e-11	1.96901e-11	1.32365e-11	1.79006e-11	2.40634e-11	1.78753e-11	3.81808e-11	1.73098e-11	2.19367e-11	1.90135e-11	1.86222e-11	2.11002e-11	1.83979e-11	2.18499e-11
6.32	1.57535e-11	1.65119e-11	2.02178e-11	1.7263e-11	1.71813e-11	2.11622e-11	1.96846e-11	1.3238e-11	1.79096e-11	2.40682e-11	1.78771e-11	3.81796e-11	1.73085e-11	2.19357e-11	1.90281e-11	1.86209e-11	2.11057e-11	1.84005e-11	2.18428e-11
6.34	1.57628e-11	1.65193e-11	2.02188e-11	1.72608e-11	1.71805e-11	2.1154e-11	1.9672e-11	1.32415e-11	1.79069e-11	2.40664e-11	1.78744e-11	3.81851e-11	1.73068e-11	2.19394e-11	1.90152e-11	1.86238e-11	2.1095e-11	1.83988e-11	2.18583e-11
6.36	1.57468e-11	1.65142e-11	2.02191e-11	1.72632e-11	1.71737e-11	2.11575e-11	1.96738e-11	1.32357e-11	1.79068e-11	2.40628e-11	1.78715e-11	3.81789e-11	1.73179e-11	2.19391e-11	1.90182e-11	1.86215e-11	2.11051e-11	1.84001e-11	2.18531e-11
6.38	1.57529e-11	1.65146e-11	2.02169e-11	1.72601e-11	1.71749e-11	2.11573e-11	1.96705e-11	1.32384e-11	1.79134e-11	2.40691e-11	1.78721e-11	3.81833e-11	1.7312e-11	2.19461e-11	1.90211e-11	1.86227e-11	2.11098e-11	1.83998e-11	2.18485e-11
6.4	1.57631e-11	1.65103e-11	2.02138e-11	1.72643e-11	1.71736e-11	2.11563e-11	1.96545e-11	1.32412e-11	1.7908e-11	2.40646e-11	1.78783e-11	3.81826e-11	1.73088e-11	2.19433e-11	1.90156e-11	1.86211e-11	2.11064e-11	1.84028e-11	2.18407e-11
6.42	1.57525e-11	1.65153e-11	2.02092e-11	1.72609e-11	1.71869e-11	2.11516e-11	1.96846e-11	1.32443e-11	1.79052e-11	2.40654e-11	1.78814e-11	3.81803e-11	1.73101e-11	2.19394e-11	1.90189e-11	1.86159e-11	2.10983e-11	1.84007e-11	2.18532e-11
6.44	1.57532e-11	1.65151e-11	2.02121e-11	1.7261e-11	1.71805e-11	2.11569e-11	1.96865e-11	1.32355e-11	1.79123e-11	2.40677e-11	1.78709e-11	3.81929e-11	1.7314e-11	2.19371e-11	1.90183e-11	1.86154e-11	2.11022e-11	1.84011e-11	2.18489e-11
6.46	1.57574e-11	1.6517e-11	2.02186e-11	1.72624e-11	1.71703e-11	2.11515e-11	1.96689e-11	1.32384e-11	1.79114e-11	2.40662e-11	1.78737e-11	3.81855e-11	1.73002e-11	2.19416e-11	1.90119e-11	1.86279e-11	2.11033e-11	1.83983e-11	2.18528e-11
6.48	1.57524e-11	1.65176e-11	2.02151e-11	1.72671e-11	1.71704e-11	2.11587e-11	1.96759e-11	1.32418e-11	1.79087e-11	2.40647e-11	1.78782e-11	3.81738e-11	1.7301e-11	2.19384e-11	1.9023e-11	1.86196e-11	2.10988e-11	1.83956e-11	2.1859e-11
6.5	1.57503e-11	1.65252e-11	2.02146e-11	1.7259e-11	1.71749e-11	2.11508e-11	1.96755e-11	1.32362e-11	1.79082e-11	2.40724e-11	1.78783e-11	3.81826e-11	1.73232e-11	2.1937e-11	1.9019e-11	1.86204e-11	2.10986e-11	1.83995e-11	2.18492e-11
6.52	1.57565e-11	1.65208e-11	2.02148e-11	1.72604e-11	1.71789e-11	2.11551e-11	1.96664e-11	1.32373e-11	1.79087e-11	2.40597e-11	1.78819e-11	3.81859e-11	1.73009e-11	2.19371e-11	1.90195e-11	1.8626e-11	2.11064e-11	1.84013e-11	2.18473e-11
6.54	1.57615e-11	1.65217e-11	2.02154e-11	1.72598e-11	1.7178e-11	2.1155e-11	1.96632e-11	1.3242e-11	1.79165e-11	2.40674e-11	1.78782e-11	3.81806e-11	1.73142e-11	2.19373e-11	1.90146e-11	1.86179e-11	2.10932e-11	1.83985e-11	2.1848e-11
6.56	1.5748e-11	1.65161e-11	2.02175e-11	1.72648e-11	1.7176e-11	2.1146e-11	1.96633e-11	1.3233e-11	1.7911e-11	2.40655e-11	1.7876e-11	3.81759e-11	1.7298e-11	2.1931e-11	1.90101e-11	1.86213e-11	2.11037e-11	1.83974e-11	2.1853e-11
6.58	1.57592e-11	1.65156e-11	2.02197e-11	1.72625e-11	1.71697e-11	2.11529e-11	1.96598e-11	1.324e-11	1.79159e-11	2.40706e-11	1.78739e-11	3.81757e-11	1.7307e-11	2.19364e-11	1.90155e-11	1.86233e-11	2.1104e-11	1.83964e-11	2.18536e-11
6.6	1.57576e-11	1.65171e-11	2.02174e-11	1.72583e-11	1.71749e-11	2.11589e-11	1.96775e-11	1.32443e-11	1.7911e-11	2.40741e-11	1.78699e-11	3.81745e-11	1.72971e-11	2.19399e-11	1.90191e-11	1.86236e-11	2.10995e-11	1.84003e-11	2.18491e-11
6.62	1.57555e-11	1.65198e-11	2.02186e-11	1.72638e-11	1.71709e-11	2.1153e-11	1.96976e-11	1.32351e-11	1.7914e-11	2.40625e-11	1.7876e-11	3.81759e-11	1.73018e-11	2.19389e-11	1.90185e-11	1.862e-11	2.1112e-11	1.83936e-11	2.18522e-11
6.64	1.57603e-11	1.65124e-11	2.02236e-11	1.72689e-11	1.71792e-11	2.11509e-11	1.96847e-11	1.32382e-11	1.79095e-11	2.4065e-11	1.78822e-11	3.81804e-11	1.73039e-11	2.19276e-11	1.90216e-11	1.86199e-11	2.11059e-11	1.84017e-11	2.18485e-11
6.66	1.57549e-11	1.65169e-11	2.02187e-11	1.7263e-11	1.72019e-11	2.11501e-11	1.96678e-11	1.32375e-11	1.79136e-11	2.40638e-11	1.78749e-11	3.81779e-11	1.72899e-11	2.19317e-11	1.90147e-11	1.86203e-11	2.1097e-11	1.83996e-11	2.18481e-11
6.68	1.57584e-11	1.65272e-11	2.02171e-11	1.72616e-11	1.71957e-11	2.11554e-11	1.96542e-11	1.3242e-11	1.79108e-11	2.40689e-11	1.78774e-11	3.81752e-11	1.72955e-11	2.19326e-11	1.90162e-11	1.86194e-11	2.1109e-11	1.84e-11	2.18487e-11
6.7	1.57673e-11	1.65152e-11	2.02237e-11	1.72711e-11	1.72088e-11	2.11494e-11	1.96675e-11	1.32374e-11	1.79099e-11	2.40729e-11	1.78739e-11	3.8184e-11	1.73034e-11	2.19327e-11	1.90123e-11	1.86178e-11	2.11062e-11	1.84038e-11	2.18518e-11
6.72	1.57675e-11	1.65136e-11	2.02178e-11	1.72601e-11	1.72161e-11	2.11545e-11	1.96799e-11	1.32374e-11	1.79108e-11	2.40702e-11	1.78772e-11	3.81844e-11	1.73047e-11	2.19365e-11	1.9024e-11	1.862e-11	2.11011e-11	1.83964e-11	2.18498e-11
6.74	1.57637e-11	1.65079e-11	2.02229e-11	1.72637e-11	1.72042e-11	2.11518e-11	1.96729e-11	1.32343e-11	1.79068e-11	2.40686e-11	1.78749e-11	3.81747e-11	1.72951e-11	2.19339e-11	1.90189e-11	1.862e-11	2.11072e-11	1.84005e-11	2.1855e-11
6.76	1.57663e-11	1.65077e-11	2.02254e-11	1.72654e-11	1.72116e-11	2.11584e-11	1.96519e-11	1.3238e-11	1.7913e-11	2.40631e-11	1.78718e-11	3.81832e-11	1.72982e-11	2.19399e-11	1.90208e-11	1.86199e-11	2.10974e-11	1.84015e-11	2.18503e-11
6.78	1.57606e-11	1.65185e-11	2.02207e-11	1.72669e-11	1.7207e-11	2.11638e-11	1.96576e-11	1.32408e-11	1.79131e-11	2.40638e-11	1.78756e-11	3.81786e-11	1.72948e-11	2.19315e-11	1.90135e-11	1.862e-11	2.10986e-11	1.84028e-11	2.18523e-11
6.8	1.57643e-11	1.65184e-11	2.02166e-11	1.7266e-11	1.72044e-11	2.11562e-11	1.97005e-11	1.32349e-11	1.79122e-11	2.40639e-11	1.7867e-11	3.81806e-11	1.73093e-11	2.19373e-11	1.90255e-11	1.86191e-11	2.11158e-11	1.8399e-11	2.18499e-11
6.82	1.57568e-11	1.65248e-11	2.02185e-11	1.72635e-11	1.72063e-11	2.11567e-11	1.96701e-11	1.32408e-11	1.79164e-11	2.40713e-11	1.78734e-11	3.81889e-11	1.72946e-11	2.194e-11	1.90268e-11	1.8622e-11	2.11069e-11	1.8395e-11	2.18511e-11
6.84	1.57587e-11	1.65149e-11	2.02195e-11	1.72636e-11	1.72068e-11	2.11537e-11	1.96664e-11	1.32342e-11	1.79174e-11	2.40696e-11	1.78706e-11	3.81793e-11	1.73032e-11	2.19342e-11	1.90073e-11	1.86191e-11	2.11042e-11	1.83974e-11	2.18456e-11
6.86	1.5762e-11	1.65147e-11	2.02179e-11	1.72668e-11	1.72081e-11	2.1157e-11	1.96814e-11	1.32391e-11	1.79139e-11	2.40664e-11	1.78686e-11	3.81829e-11	1.72875e-11	2.19359e-11	1.90101e-11	1.86179e-11	2.11025e-11	1.84008e-11	2.18449e-11
6.88	1.57474e-11	1.6516e-11	2.02192e-11	1.72638e-11	1.7214e-11	2.11504e-11	1.9654e-11	1.32367e-11	1.79119e-11	2.40687e-11	1.78776e-11	3.81834e-11	1.73107e-11	2.19434e-11	1.90166e-11	1.86186e-11	2.1101e-11	1.84038e-11	2.18472e-11
6.9	1.57512e-11	1.65138e-11	2.02237e-11	1.72632e-11	1.72081e-11	2.11536e-11	1.96726e-11	1.3235e-11	1.79153e-11	2.40621e-11	1.78788e-11	3.81805e-11	1.73246e-11	2.19383e-11	1.901e-11	1.86219e-11	2.11066e-11	1.84004e-11	2.18487e-11
6.92	1.5756e-11	1.65112e-11	2.02195e-11	1.72661e-11	1.72102e-11	2.1149e-11	1.96628e-11	1.32391e-11	1.79107e-11	2.40678e-11	1.78758e-11	3.81847e-11	1.72991e-11	2.19314e-11	1.90051e-11	1.8623e-11	2.11052e-11	1.83975e-11	2.18504e-11
6.94	1.57663e-11	1.65097e-11	2.02185e-11	1.72606e-11	1.72064e-11	2.11449e-11	1.96666e-11	1.32362e-11	1.79178e-11	2.40693e-11	1.78766e-11	3.8185e-11	1.73139e-11	2.1936e-11	1.90204e-11	1.86208e-11	2.11021e-11	1.84013e-11	2.18479e-11
6.96	1.57595e-11	1.65125e-11	2.02239e-11	1.72663e-11	1.72105e-11	2.11482e-11	1.96667e-11	1.32327e-11	1.79167e-11	2.40711e-11	1.7878e-11	3.81778e-11	1.73316e-11	2.1939e-11	1.90151e-11	1.86199e-11	2.11071e-11	1.83958e-11	2.18479e-11
6.98	1.57535e-11	1.65077e-11	2.02111e-11	1.72665e-11	1.721e-11	2.11506e-11	1.96561e-11	1.32415e-11	1.79204e-11	2.4078e-11	1.78774e-11	3.81815e-11	1.73112e-11	2.19375e-11	1.90147e-11	1.86162e-11	2.11001e-11	1.83989e-11	2.18457e-11
7	1.57473e-11	1.65156e-11	2.02131e-11	1.72628e-11	1.72056e-11	2.11541e-11	1.9668e-11	1.32352e-11	1.79153e-11	2.40714e-11	1.78772e-11	3.8182e-11	1.73132e-11	2.19379e-11	1.9021e-11	1.86241e-11	2.11041e-11	1.84002e-11	2.18515e-11
7.02	1.57522e-11	1.65019e-11	2.0206e-11	1.72666e-11	1.71992e-11	2.1147e-11	1.96811e-11	1.3235e-11	1.79123e-11	2.40684e-11	1.78729e-11	3.81748e-11	1.73113e-11	2.1937e-11	1.90167e-11	1.86182e-11	2.1101e-11	1.84043e-11	2.18489e-11
7.04	1.57473e-11	1.65134e-11	2.02007e-11	1.72737e-11	1.7204e-11	2.1156e-11	1.96907e-11	1.32395e-11	1.79146e-11	2.40671e-11	1.78733e-11	3.8179e-11	1.7325e-11	2.19318e-11	1.90089e-11	1.8617e-11	2.11018e-11	1.83967e-11	2.18442e-11
7.06	1.5754e-11	1.65215e-11	2.01924e-11	1.72664e-11	1.7201e-11	2.11507e-11	1.96572e-11	1.32367e-11	1.79137e-11	2.40658e-11	1.78714e-11	3.81864e-11	1.73072e-11	2.19355e-11	1.90244e-11	1.86223e-11	2.11039e-11	1.84042e-11	2.18474e-11
7.08	1.57492e-11	1.65207e-11	2.01983e-11	1.72592e-11	1.72116e-11	2.11562e-11	1.96771e-11	1.32432e-11	1.79133e-11	2.40657e-11	1.78736e-11	3.81846e-11	1.7324e-11	2.19375e-11	1.90157e-11	1.86226e-11	2.10978e-11	1.83926e-11	2.18427e-11
7.1	1.57464e-11	1.65226e-11	2.01987e-11	1.72651e-11	1.72044e-11	2.1148e-11	1.96707e-11	1.32366e-11	1.79116e-11	2.40692e-11	1.78747e-11	3.8185e-11	1.7306e-11	2.19401e-11	1.90138e-11	1.86144e-11	2.11117e-11	1.84072e-11	2.1855e-11
7.12	1.57578e-11	1.65175e-11	2.0198e-11	1.72637e-11	1.72114e-11	2.11494e-11	1.97068e-11	1.32363e-11	1.79191e-11	2.40646e-11	1.78763e-11	3.81776e-11	1.73187e-11	2.19338e-11	1.90108e-11	1.86191e-11	2.1098e-11	1.8409e-11	2.18505e-11
7.14	1.57545e-11	1.6516e-11	2.01954e-11	1.72667e-11	1.72096e-11	2.11489e-11	1.96645e-11	1.32345e-11	1.79207e-11	2.40672e-11	1.78738e-11	3.81844e-11	1.73077e-11	2.1929e-11	1.90148e-11	1.86251e-11	2.11021e-11	1.84023e-11	2.18499e-11
7.16	1.57542e-11	1.65149e-11	2.01985e-11	1.72657e-11	1.72117e-11	2.1144e-11	1.96643e-11	1.32403e-11	1.79121e-11	2.40702e-11	1.78734e-11	3.81727e-11	1.73099e-11	2.19423e-11	1.90077e-11	1.86194e-11	2.11094e-11	1.84005e-11	2.18388e-11
7.18	1.5743e-11	1.65137e-11	2.01982e-11	1.72664e-11	1.72147e-11	2.1142e-11	1.96984e-11	1.32371e-11	1.79077e-11	2.40641e-11	1.78743e-11	3.81792e-11	1.73106e-11	2.19348e-11	1.90191e-11	1.86229e-11	2.11047e-11	1.84006e-11	2.18408e-11
7.2	1.57523e-11	1.65139e-11	2.02055e-11	1.72682e-11	1.72089e-11	2.11451e-11	1.96697e-11	1.32361e-11	1.79123e-11	2.4071e-11	1.78771e-11	3.81849e-11	1.73162e-11	2.19337e-11	1.9019e-11	1.86276e-11	2.11085e-11	1.84019e-11	2.18458e-11
7.22	1.57464e-11	1.65092e-11	2.02017e-11	1.72675e-11	1.72084e-11	2.11432e-11	1.96726e-11	1.32411e-11	1.79176e-11	2.40698e-11	1.78808e-11	3.81852e-11	1.73257e-11	2.19388e-11	1.90167e-11	1.86204e-11	2.11005e-11	1.8396e-11	2.18454e-11
7.24	1.57426e-11	1.65168e-11	2.02068e-11	1.72649e-11	1.72101e-11	2.11401e-11	1.96737e-11	1.32402e-11	1.79204e-11	2.40648e-11	1.78779e-11	3.81781e-11	1.73244e-11	2.1934e-11	1.90168e-11	1.86161e-11	2.11079e-11	1.84016e-11	2.18524e-11
7.26	1.57469e-11	1.65185e-11	2.02054e-11	1.72608e-11	1.72092e-11	2.11499e-11	1.96706e-11	1.32394e-11	1.79145e-11	2.4068e-11	1.78768e-11	3.81834e-11	1.73327e-11	2.19335e-11	1.9015e-11	1.86171e-11	2.11101e-11	1.83981e-11	2.18485e-11
7.28	1.57419e-11	1.65157e-11	2.02042e-11	1.72671e-11	1.72043e-11	2.11398e-11	1.96752e-11	1.32326e-11	1.79136e-11	2.40674e-11	1.78731e-11	3.81776e-11	1.73333e-11	2.194e-11	1.90161e-11	1.8624e-11	2.11024e-11	1.83911e-11	2.18445e-11
7.3	1.57335e-11	1.65133e-11	2.02036e-11	1.72617e-11	1.72034e-11	2.1137e-11	1.96575e-11	1.3238e-11	1.79124e-11	2.40696e-11	1.78743e-11	3.81793e-11	1.73306e-11	2.19431e-11	1.90076e-11	1.8625e-11	2.11121e-11	1.8399e-11	2.18472e-11
7.32	1.57441e-11	1.65194e-11	2.02122e-11	1.72695e-11	1.72086e-11	2.11411e-11	1.96763e-11	1.32358e-11	1.79141e-11	2.4073e-11	1.78772e-11	3.81859e-11	1.73168e-11	2.19363e-11	1.90125e-11	1.86165e-11	2.11068e-11	1.84012e-11	2.18435e-11
7.34	1.57352e-11	1.65111e-11	2.02081e-11	1.72674e-11	1.72073e-11	2.11471e-11	1.96882e-11	1.32348e-11	1.7913e-11	2.40747e-11	1.78794e-11	3.81782e-11	1.73189e-11	2.19357e-11	1.9014e-11	1.86226e-11	2.11087e-11	1.84004e-11	2.1851e-11
7.36	1.57395e-11	1.65125e-11	2.02153e-11	1.72641e-11	1.72046e-11	2.11475e-11	1.96847e-11	1.32371e-11	1.79151e-11	2.40713e-11	1.78761e-11	3.81835e-11	1.73119e-11	2.19316e-11	1.902e-11	1.86197e-11	2.1101e-11	1.83966e-11	2.18446e-11
7.38	1.57429e-11	1.65176e-11	2.02137e-11	1.72666e-11	1.72013e-11	2.11415e-11	1.96621e-11	1.32359e-11	1.79152e-11	2.40666e-11	1.78732e-11	3.819e-11	1.73129e-11	2.19395e-11	1.90203e-11	1.86215e-11	2.11013e-11	1.84037e-11	2.18531e-11
7.4	1.57342e-11	1.6512e-11	2.02138e-11	1.72683e-11	1.72025e-11	2.11444e-11	1.96674e-11	1.3237e-11	1.79154e-11	2.40678e-11	1.78741e-11	3.81862e-11	1.73121e-11	2.19387e-11	1.90146e-11	1.86175e-11	2.10914e-11	1.83994e-11	2.18458e-11
7.42	1.57384e-11	1.65139e-11	2.0213e-11	1.72644e-11	1.72017e-11	2.11488e-11	1.9654e-11	1.32397e-11	1.79166e-11	2.40648e-11	1.78746e-11	3.8187e-11	1.73163e-11	2.19294e-11	1.90181e-11	1.86211e-11	2.11118e-11	1.83979e-11	2.18489e-11
7.44	1.57408e-11	1.65197e-11	2.02159e-11	1.72668e-11	1.72096e-11	2.11488e-11	1.96655e-11	1.32374e-11	1.79117e-11	2.40673e-11	1.7882e-11	3.81794e-11	1.73131e-11	2.19353e-11	1.90195e-11	1.86195e-11	2.10981e-11	1.84005e-11	2.18556e-11
7.46	1.57418e-11	1.65146e-11	2.02225e-11	1.7265e-11	1.72112e-11	2.11453e-11	1.96598e-11	1.32397e-11	1.79143e-11	2.40678e-11	1.78783e-11	3.81797e-11	1.7298e-11	2.194e-11	1.9017e-11	1.86208e-11	2.1112e-11	1.84056e-11	2.18557e-11
7.48	1.57368e-11	1.65212e-11	2.02157e-11	1.72594e-11	1.72069e-11	2.115e-11	1.96635e-11	1.32372e-11	1.79171e-11	2.40681e-11	1.78821e-11	3.81918e-11	1.7311e-11	2.19357e-11	1.90203e-11	1.8617e-11	2.11009e-11	1.83989e-11	2.18575e-11
7.5	1.57465e-11	1.65092e-11	2.02198e-11	1.72686e-11	1.72061e-11	2.11556e-11	1.96629e-11	1.32382e-11	1.79132e-11	2.40667e-11	1.78747e-11	3.81747e-11	1.73012e-11	2.19399e-11	1.90152e-11	1.86152e-11	2.11129e-11	1.84013e-11	2.18552e-11
7.52	1.57436e-11	1.65205e-11	2.02171e-11	1.72687e-11	1.71999e-11	2.11527e-11	1.96889e-11	1.32383e-11	1.79131e-11	2.40695e-11	1.78762e-11	3.81829e-11	1.73273e-11	2.19384e-11	1.90201e-11	1.86227e-11	2.11099e-11	1.83955e-11	2.1853e-11
7.54	1.57446e-11	1.65175e-11	2.02212e-11	1.72639e-11	1.72053e-11	2.11508e-11	1.96662e-11	1.32422e-11	1.79166e-11	2.40677e-11	1.78781e-11	3.81851e-11	1.73239e-11	2.19387e-11	1.90112e-11	1.86232e-11	2.1105e-11	1.83997e-11	2.18506e-11
7.56	1.57549e-11	1.6512e-11	2.0226e-11	1.72677e-11	1.7206e-11	2.11434e-11	1.96502e-11	1.32355e-11	1.79146e-11	2.40641e-11	1.78765e-11	3.8184e-11	1.73177e-11	2.19427e-11	1.90171e-11	1.86198e-11	2.11085e-11	1.84042e-11	2.18485e-11
7.58	1.57524e-11	1.65126e-11	2.02293e-11	1.72701e-11	1.72085e-11	2.11376e-11	1.96702e-11	1.32386e-11	1.79154e-11	2.40659e-11	1.78806e-11	3.81788e-11	1.7307e-11	2.19373e-11	1.90155e-11	1.86227e-11	2.11109e-11	1.83986e-11	2.18486e-11
7.6	1.57445e-11	1.65103e-11	2.02255e-11	1.72631e-11	1.72089e-11	2.11441e-11	1.96599e-11	1.32371e-11	1.79229e-11	2.40656e-11	1.78793e-11	3.81778e-11	1.73087e-11	2.19387e-11	1.90229e-11	1.86168e-11	2.11019e-11	1.83944e-11	2.18492e-11
7.62	1.57497e-11	1.65179e-11	2.02274e-11	1.72627e-11	1.7202e-11	2.11432e-11	1.96689e-11	1.32392e-11	1.79174e-11	2.40631e-11	1.78785e-11	3.81817e-11	1.73105e-11	2.19372e-11	1.90181e-11	1.86219e-11	2.11021e-11	1.8392e-11	2.18456e-11
7.64	1.57455e-11	1.65193e-11	2.02275e-11	1.72653e-11	1.72041e-11	2.11356e-11	1.96609e-11	1.32418e-11	1.79123e-11	2.40716e-11	1.78758e-11	3.81799e-11	1.73021e-11	2.19319e-11	1.90133e-11	1.86186e-11	2.11046e-11	1.83971e-11	2.18555e-11
7.66	1.57521e-11	1.65114e-11	2.02244e-11	1.72688e-11	1.72049e-11	2.11385e-11	1.96738e-11	1.32368e-11	1.79155e-11	2.40703e-11	1.78701e-11	3.8192e-11	1.73325e-11	2.19346e-11	1.90223e-11	1.86173e-11	2.11052e-11	1.84009e-11	2.18478e-11
7.68	1.57467e-11	1.65111e-11	2.02283e-11	1.72651e-11	1.72105e-11	2.11516e-11	1.96878e-11	1.32385e-11	1.79193e-11	2.40662e-11	1.78754e-11	3.81842e-11	1.73081e-11	2.19378e-11	1.90101e-11	1.86247e-11	2.11046e-11	1.83977e-11	2.18498e-11
7.7	1.57467e-11	1.65142e-11	2.02305e-11	1.72694e-11	1.7208e-11	2.114e-11	1.96729e-11	1.32411e-11	1.79201e-11	2.40574e-11	1.78786e-11	3.81795e-11	1.73128e-11	2.19402e-11	1.90096e-11	1.86191e-11	2.11024e-11	1.84024e-11	2.18595e-11
7.72	1.57439e-11	1.65143e-11	2.02333e-11	1.72661e-11	1.7203e-11	2.11496e-11	1.96827e-11	1.32314e-11	1.79161e-11	2.40662e-11	1.7872e-11	3.81862e-11	1.72935e-11	2.19361e-11	1.90174e-11	1.86198e-11	2.10989e-11	1.84002e-11	2.18484e-11
7.74	1.57556e-11	1.65215e-11	2.02343e-11	1.72727e-11	1.71997e-11	2.11485e-11	1.96901e-11	1.32426e-11	1.79187e-11	2.40704e-11	1.78727e-11	3.81831e-11	1.73086e-11	2.19427e-11	1.9019e-11	1.86184e-11	2.10932e-11	1.84013e-11	2.1845e-11
7.76	1.57484e-11	1.65159e-11	2.02431e-11	1.72682e-11	1.72042e-11	2.1147e-11	1.96824e-11	1.32363e-11	1.79164e-11	2.40678e-11	1.78741e-11	3.81791e-11	1.73067e-11	2.19378e-11	1.90258e-11	1.86231e-11	2.11053e-11	1.83964e-11	2.1853e-11
7.78	1.57485e-11	1.65184e-11	2.02362e-11	1.72666e-11	1.72048e-11	2.11528e-11	1.96499e-11	1.32354e-11	1.79183e-11	2.40648e-11	1.78787e-11	3.81727e-11	1.72992e-11	2.19387e-11	1.90192e-11	1.86198e-11	2.11021e-11	1.83967e-11	2.18425e-11
7.8	1.57495e-11	1.65083e-11	2.02354e-11	1.72709e-11	1.71989e-11	2.11561e-11	1.96777e-11	1.32368e-11	1.79131e-11	2.40645e-11	1.78795e-11	3.81734e-11	1.73032e-11	2.19413e-11	1.90227e-11	1.86196e-11	2.11031e-11	1.83949e-11	2.18471e-11
7.82	1.57493e-11	1.65092e-11	2.02463e-11	1.7267e-11	1.72069e-11	2.11438e-11	1.96539e-11	1.32423e-11	1.79189e-11	2.40673e-11	1.78797e-11	3.8175e-11	1.72977e-11	2.19367e-11	1.90173e-11	1.8619e-11	2.10972e-11	1.84004e-11	2.18514e-11
7.84	1.57498e-11	1.65101e-11	2.02409e-11	1.72693e-11	1.7203e-11	2.11475e-11	1.96668e-11	1.32371e-11	1.79155e-11	2.40622e-11	1.78722e-11	3.81762e-11	1.72935e-11	2.1937e-11	1.90179e-11	1.86183e-11	2.11046e-11	1.84034e-11	2.18494e-11
7.86	1.57422e-11	1.65082e-11	2.02452e-11	1.7277e-11	1.72058e-11	2.11433e-11	1.96856e-11	1.32339e-11	1.79199e-11	2.40659e-11	1.78731e-11	3.81727e-11	1.73094e-11	2.19327e-11	1.90194e-11	1.86172e-11	2.10897e-11	1.84042e-11	2.18532e-11
7.88	1.57447e-11	1.65166e-11	2.02487e-11	1.7269e-11	1.72112e-11	2.11478e-11	1.96838e-11	1.32363e-11	1.79117e-11	2.40665e-11	1.78731e-11	3.81865e-11	1.73043e-11	2.19308e-11	1.90172e-11	1.86236e-11	2.10999e-11	1.83997e-11	2.1847e-11
7.9	1.57459e-11	1.65115e-11	2.02479e-11	1.72649e-11	1.72e-11	2.1148e-11	1.96803e-11	1.32374e-11	1.79129e-11	2.40703e-11	1.78752e-11	3.81811e-11	1.73082e-11	2.19383e-11	1.90162e-11	1.86191e-11	2.10991e-11	1.83964e-11	2.18481e-11
7.92	1.57529e-11	1.65159e-11	2.02491e-11	1.72648e-11	1.72077e-11	2.11456e-11	1.96754e-11	1.3246e-11	1.79241e-11	2.40661e-11	1.78705e-11	3.81863e-11	1.73176e-11	2.19291e-11	1.90119e-11	1.86186e-11	2.11097e-11	1.8399e-11	2.18474e-11
7.94	1.57414e-11	1.65136e-11	2.02489e-11	1.72662e-11	1.7203e-11	2.11493e-11	1.96859e-11	1.32346e-11	1.79234e-11	2.40667e-11	1.7871e-11	3.81916e-11	1.73015e-11	2.19378e-11	1.90187e-11	1.86174e-11	2.11004e-11	1.8395e-11	2.18482e-11
7.96	1.57564e-11	1.65233e-11	2.02452e-11	1.72655e-11	1.72066e-11	2.1143e-11	1.97083e-11	1.31427e-11	1.79153e-11	2.40673e-11	1.78773e-11	3.81888e-11	1.73103e-11	2.19397e-11	1.90203e-11	1.86226e-11	2.10995e-11	1.83969e-11	2.18455e-11
7.98	1.57562e-11	1.65235e-11	2.02554e-11	1.72696e-11	1.72023e-11	2.11391e-11	1.96856e-11	1.30651e-11	1.79151e-11	2.40683e-11	1.78768e-11	3.8195e-11	1.73197e-11	2.19369e-11	1.90176e-11	1.86199e-11	2.11035e-11	1.84055e-11	2.18468e-11
8	1.57397e-11	1.65202e-11	2.02507e-11	1.72647e-11	1.72078e-11	2.11445e-11	1.96892e-11	1.30479e-11	1.79128e-11	2.40682e-11	1.78767e-11	3.81859e-11	1.73374e-11	2.19448e-11	1.90149e-11	1.86207e-11	2.10953e-11	1.84035e-11	2.18564e-11
8.02	1.57522e-11	1.65059e-11	2.02513e-11	1.7272e-11	1.72087e-11	2.1147e-11	1.96884e-11	1.30397e-11	1.7911e-11	2.40672e-11	1.78729e-11	3.81807e-11	1.73289e-11	2.19382e-11	1.90173e-11	1.8618e-11	2.10987e-11	1.84007e-11	2.18487e-11
8.04	1.57471e-11	1.65113e-11	2.02565e-11	1.7267e-11	1.72132e-11	2.11445e-11	1.96699e-11	1.30308e-11	1.79152e-11	2.40658e-11	1.78728e-11	3.81813e-11	1.73292e-11	2.19421e-11	1.90119e-11	1.86183e-11	2.1093e-11	1.83971e-11	2.18496e-11
8.06	1.57477e-11	1.65109e-11	2.02535e-11	1.72682e-11	1.72083e-11	2.11435e-11	1.96898e-11	1.30334e-11	1.79153e-11	2.4066e-11	1.7873e-11	3.81802e-11	1.73092e-11	2.19421e-11	1.90154e-11	1.86219e-11	2.10963e-11	1.83975e-11	2.18566e-11
8.08	1.57398e-11	1.65166e-11	2.02569e-11	1.72724e-11	1.72039e-11	2.11372e-11	1.9669e-11	1.30259e-11	1.79191e-11	2.40656e-11	1.78791e-11	3.8179e-11	1.733e-11	2.19379e-11	1.90187e-11	1.86178e-11	2.10968e-11	1.84039e-11	2.18558e-11
8.1	1.57486e-11	1.65223e-11	2.0264e-11	1.72676e-11	1.72027e-11	2.11541e-11	1.968e-11	1.30228e-11	1.79161e-11	2.40665e-11	1.78765e-11	3.81838e-11	1.73363e-11	2.19344e-11	1.90224e-11	1.86173e-11	2.11024e-11	1.84029e-11	2.18474e-11
8.12	1.57375e-11	1.65159e-11	2.02604e-11	1.72679e-11	1.72105e-11	2.11427e-11	1.96796e-11	1.30246e-11	1.79159e-11	2.40625e-11	1.7871e-11	3.81819e-11	1.73199e-11	2.19392e-11	1.90137e-11	1.86167e-11	2.11075e-11	1.84009e-11	2.18463e-11
8.14	1.57479e-11	1.65152e-11	2.02666e-11	1.72694e-11	1.7207e-11	2.11546e-11	1.96638e-11	1.30257e-11	1.79175e-11	2.40596e-11	1.78788e-11	3.81802e-11	1.73312e-11	2.19393e-11	1.90192e-11	1.86205e-11	2.11015e-11	1.84061e-11	2.18458e-11
8.16	1.57367e-11	1.65197e-11	2.02623e-11	1.7265e-11	1.72084e-11	2.11557e-11	1.97153e-11	1.30325e-11	1.79155e-11	2.40647e-11	1.78716e-11	3.81846e-11	1.73241e-11	2.19398e-11	1.9014e-11	1.86214e-11	2.11046e-11	1.83997e-11	2.185e-11
8.18	1.57406e-11	1.6517e-11	2.02609e-11	1.72692e-11	1.72055e-11	2.11533e-11	1.96809e-11	1.30274e-11	1.79171e-11	2.40682e-11	1.78724e-11	3.81838e-11	1.73162e-11	2.19447e-11	1.90098e-11	1.86189e-11	2.10971e-11	1.84027e-11	2.18519e-11
8.2	1.57347e-11	1.65193e-11	2.02646e-11	1.72702e-11	1.72074e-11	2.11478e-11	1.968e-11	1.3028e-11	1.79214e-11	2.40638e-11	1.78745e-11	3.81752e-11	1.73178e-11	2.19401e-11	1.90105e-11	1.86237e-11	2.10995e-11	1.84022e-11	2.18447e-11
8.22	1.57332e-11	1.65182e-11	2.02712e-11	1.72686e-11	1.72122e-11	2.11502e-11	1.96871e-11	1.30266e-11	1.79203e-11	2.40681e-11	1.78742e-11	3.81791e-11	1.73236e-11	2.19397e-11	1.90185e-11	1.86187e-11	2.11014e-11	1.84036e-11	2.18473e-11
8.24	1.57481e-11	1.6518e-11	2.02606e-11	1.72692e-11	1.7213e-11	2.11519e-11	1.96608e-11	1.30289e-11	1.79177e-11	2.40701e-11	1.78715e-11	3.81824e-11	1.73126e-11	2.19443e-11	1.90195e-11	1.86215e-11	2.11066e-11	1.83984e-11	2.18492e-11
8.26	1.57464e-11	1.65168e-11	2.02684e-11	1.72725e-11	1.72074e-11	2.11543e-11	1.96792e-11	1.3027e-11	1.79145e-11	2.40759e-11	1.78757e-11	3.81806e-11	1.73098e-11	2.19405e-11	1.90153e-11	1.86179e-11	2.10988e-11	1.84014e-11	2.18437e-11
8.28	1.57435e-11	1.65186e-11	2.02679e-11	1.72652e-11	1.72086e-11	2.11568e-11	1.96856e-11	1.3029e-11	1.79127e-11	2.40657e-11	1.78742e-11	3.81894e-11	1.73253e-11	2.19381e-11	1.90067e-11	1.86257e-11	2.11057e-11	1.83957e-11	2.18506e-11
8.3	1.57401e-11	1.65206e-11	2.02722e-11	1.7268e-11	1.72055e-11	2.11588e-11	1.9592e-11	1.30326e-11	1.7924e-11	2.40623e-11	1.78709e-11	3.81772e-11	1.73211e-11	2.19461e-11	1.90091e-11	1.86204e-11	2.11081e-11	1.8402e-11	2.18458e-11
8.32	1.57424e-11	1.65193e-11	2.02761e-11	1.7267e-11	1.7206e-11	2.11573e-11	1.96953e-11	1.30325e-11	1.79174e-11	2.40706e-11	1.78701e-11	3.81805e-11	1.72968e-11	2.1947e-11	1.90147e-11	1.86237e-11	2.11048e-11	1.84013e-11	2.18492e-11
8.34	1.57527e-11	1.65224e-11	2.02734e-11	1.72671e-11	1.72133e-11	2.11496e-11	1.9686e-11	1.30307e-11	1.79174e-11	2.40614e-11	1.78741e-11	3.8179e-11	1.73143e-11	2.19484e-11	1.90181e-11	1.8621e-11	2.10949e-11	1.83973e-11	2.18473e-11
8.36	1.57457e-11	1.65239e-11	2.0269e-11	1.72624e-11	1.72074e-11	2.11484e-11	1.96403e-11	1.30306e-11	1.79221e-11	2.40657e-11	1.78763e-11	3.81795e-11	1.73072e-11	2.19405e-11	1.90139e-11	1.86183e-11	2.1099e-11	1.84041e-11	2.18537e-11
8.38	1.57383e-11	1.6525e-11	2.02653e-11	1.72683e-11	1.72089e-11	2.11547e-11	1.96192e-11	1.30302e-11	1.7919e-11	2.40689e-11	1.7871e-11	3.81797e-11	1.73049e-11	2.19404e-11	1.90117e-11	1.86206e-11	2.10991e-11	1.84004e-11	2.18423e-11
8.4	1.57452e-11	1.65222e-11	2.0279e-11	1.7264e-11	1.7212e-11	2.11522e-11	1.95738e-11	1.30296e-11	1.79172e-11	2.40685e-11	1.78727e-11	3.81833e-11	1.73136e-11	2.19415e-11	1.90053e-11	1.86218e-11	2.11072e-11	1.84023e-11	2.18532e-11
8.42	1.5739e-11	1.65222e-11	2.02722e-11	1.72683e-11	1.72103e-11	2.1146e-11	1.95824e-11	1.30337e-11	1.79212e-11	2.40647e-11	1.788e-11	3.81776e-11	1.73153e-11	2.19438e-11	1.90136e-11	1.86223e-11	2.11047e-11	1.83981e-11	2.18454e-11
8.44	1.57379e-11	1.65188e-11	2.02723e-11	1.7266e-11	1.72092e-11	2.11515e-11	1.95956e-11	1.30309e-11	1.79167e-11	2.40688e-11	1.78747e-11	3.81773e-11	1.73173e-11	2.19424e-11	1.90061e-11	1.86215e-11	2.11024e-11	1.84027e-11	2.18442e-11
8.46	1.5742e-11	1.65265e-11	2.02742e-11	1.72681e-11	1.7239e-11	2.11453e-11	1.95463e-11	1.30337e-11	1.79174e-11	2.40642e-11	1.78747e-11	3.81894e-11	1.7313e-11	2.19398e-11	1.90062e-11	1.86231e-11	2.11072e-11	1.84022e-11	2.184e-11
8.48	1.57354e-11	1.65166e-11	2.0276e-11	1.72681e-11	1.72505e-11	2.11515e-11	1.95424e-11	1.30313e-11	1.79222e-11	2.40609e-11	1.78741e-11	3.8194e-11	1.73137e-11	2.19427e-11	1.90103e-11	1.86206e-11	2.11051e-11	1.8398e-11	2.18554e-11
8.5	1.57311e-11	1.65156e-11	2.02766e-11	1.72677e-11	1.72482e-11	2.1153e-11	1.95394e-11	1.30321e-11	1.79148e-11	2.40672e-11	1.78758e-11	3.81777e-11	1.73012e-11	2.19394e-11	1.90176e-11	1.86157e-11	2.11017e-11	1.83981e-11	2.18516e-11
8.52	1.57405e-11	1.65217e-11	2.0276e-11	1.72734e-11	1.72493e-11	2.11464e-11	1.95257e-11	1.30327e-11	1.79163e-11	2.40719e-11	1.78721e-11	3.81923e-11	1.73006e-11	2.19391e-11	1.90189e-11	1.86184e-11	2.11081e-11	1.83987e-11	2.18509e-11
8.54	1.57325e-11	1.65205e-11	2.02811e-11	1.72698e-11	1.72487e-11	2.11415e-11	1.95162e-11	1.30294e-11	1.79163e-11	2.40733e-11	1.78747e-11	3.81803e-11	1.72975e-11	2.19314e-11	1.90106e-11	1.86155e-11	2.11015e-11	1.83974e-11	2.18506e-11
8.56	1.57306e-11	1.65187e-11	2.02749e-11	1.7268e-11	1.72467e-11	2.11444e-11	1.95346e-11	1.30341e-11	1.79157e-11	2.40658e-11	1.78788e-11	3.81929e-11	1.72876e-11	2.19386e-11	1.90183e-11	1.86182e-11	2.11086e-11	1.84002e-11	2.18531e-11
8.58	1.57455e-11	1.65222e-11	2.02792e-11	1.72617e-11	1.72495e-11	2.11388e-11	1.95195e-11	1.30352e-11	1.79156e-11	2.40739e-11	1.78751e-11	3.81794e-11	1.72947e-11	2.19392e-11	1.90187e-11	1.86211e-11	2.11044e-11	1.83977e-11	2.18502e-11
8.6	1.5742e-11	1.65275e-11	2.02799e-11	1.7268e-11	1.72479e-11	2.11417e-11	1.94983e-11	1.30285e-11	1.79176e-11	2.40656e-11	1.78767e-11	3.81885e-11	1.73144e-11	2.19445e-11	1.90178e-11	1.86186e-11	2.11087e-11	1.83993e-11	2.18595e-11
8.62	1.57353e-11	1.65215e-11	2.02779e-11	1.7265e-11	1.7244e-11	2.11439e-11	1.94698e-11	1.30367e-11	1.79144e-11	2.40661e-11	1.78748e-11	3.81836e-11	1.73218e-11	2.19441e-11	1.90091e-11	1.86198e-11	2.11115e-11	1.84042e-11	2.18534e-11
8.64	1.57324e-11	1.65167e-11	2.02882e-11	1.72666e-11	1.72539e-11	2.11528e-11	1.94997e-11	1.30325e-11	1.79181e-11	2.4063e-11	1.78784e-11	3.81859e-11	1.73257e-11	2.19362e-11	1.90089e-11	1.86215e-11	2.11042e-11	1.8404e-11	2.18551e-11
8.66	1.57432e-11	1.65274e-11	2.02774e-11	1.72667e-11	1.72519e-11	2.11587e-11	1.95176e-11	1.30308e-11	1.79183e-11	2.40644e-11	1.78768e-11	3.81882e-11	1.73062e-11	2.19384e-11	1.90067e-11	1.86206e-11	2.11067e-11	1.83969e-11	2.18576e-11
8.68	1.57451e-11	1.65261e-11	2.02825e-11	1.7271e-11	1.72453e-11	2.11543e-11	1.95017e-11	1.30313e-11	1.79197e-11	2.40696e-11	1.78719e-11	3.81853e-11	1.73114e-11	2.19449e-11	1.90052e-11	1.86184e-11	2.11072e-11	1.84009e-11	2.18564e-11
8.7	1.57442e-11	1.65182e-11	2.02838e-11	1.72692e-11	1.72508e-11	2.11517e-11	1.94874e-11	1.30272e-11	1.79206e-11	2.40714e-11	1.78722e-11	3.81833e-11	1.72957e-11	2.19424e-11	1.90083e-11	1.8623e-11	2.11013e-11	1.84011e-11	2.18532e-11
8.72	1.57333e-11	1.65166e-11	2.02785e-11	1.72672e-11	1.72515e-11	2.11602e-11	1.94957e-11	1.30367e-11	1.79169e-11	2.40657e-11	1.78688e-11	3.81892e-11	1.73048e-11	2.19413e-11	1.90142e-11	1.86177e-11	2.11022e-11	1.83953e-11	2.1856e-11
8.74	1.57376e-11	1.65104e-11	2.02896e-11	1.72676e-11	1.72513e-11	2.1151e-11	1.95129e-11	1.30352e-11	1.79143e-11	2.40684e-11	1.78772e-11	3.81807e-11	1.73165e-11	2.19476e-11	1.90182e-11	1.86181e-11	2.11039e-11	1.83946e-11	2.18574e-11
8.76	1.57359e-11	1.65109e-11	2.02847e-11	1.72679e-11	1.72481e-11	2.11535e-11	1.94991e-11	1.30338e-11	1.79078e-11	2.40726e-11	1.78728e-11	3.81889e-11	1.73078e-11	2.19514e-11	1.90219e-11	1.86155e-11	2.11007e-11	1.8402e-11	2.18516e-11
8.78	1.5735e-11	1.65194e-11	2.0282e-11	1.72639e-11	1.72516e-11	2.11486e-11	1.9508e-11	1.30271e-11	1.79142e-11	2.40729e-11	1.7871e-11	3.81792e-11	1.73075e-11	2.19409e-11	1.90142e-11	1.86113e-11	2.11062e-11	1.84015e-11	2.18554e-11
8.8	1.57416e-11	1.65209e-11	2.02905e-11	1.72657e-11	1.72533e-11	2.1151e-11	1.95065e-11	1.30325e-11	1.79163e-11	2.40693e-11	1.78733e-11	3.81833e-11	1.73016e-11	2.19387e-11	1.90184e-11	1.86221e-11	2.11032e-11	1.8402e-11	2.1852e-11
8.82	1.57401e-11	1.65166e-11	2.02885e-11	1.72673e-11	1.72559e-11	2.11486e-11	1.95024e-11	1.30328e-11	1.792e-11	2.40696e-11	1.7868e-11	3.81779e-11	1.72904e-11	2.19466e-11	1.9015e-11	1.86127e-11	2.11097e-11	1.84062e-11	2.18492e-11
8.84	1.57467e-11	1.65183e-11	2.02888e-11	1.72687e-11	1.72512e-11	2.11554e-11	1.94921e-11	1.30327e-11	1.79216e-11	2.40696e-11	1.78666e-11	3.81849e-11	1.73048e-11	2.19444e-11	1.90139e-11	1.8621e-11	2.11023e-11	1.83987e-11	2.18636e-11
8.86	1.57353e-11	1.65177e-11	2.02926e-11	1.72641e-11	1.72531e-11	2.11516e-11	1.94912e-11	1.30292e-11	1.79178e-11	2.40663e-11	1.78706e-11	3.81785e-11	1.73163e-11	2.1943e-11	1.90114e-11	1.86198e-11	2.10979e-11	1.83975e-11	2.18579e-11
8.88	1.57426e-11	1.65296e-11	2.02884e-11	1.72656e-11	1.72499e-11	2.1152e-11	1.9495e-11	1.30318e-11	1.79147e-11	2.40676e-11	1.78687e-11	3.81756e-11	1.72951e-11	2.1941e-11	1.90072e-11	1.86234e-11	2.10984e-11	1.84015e-11	2.1854e-11
8.9	1.57406e-11	1.65283e-11	2.02907e-11	1.72664e-11	1.72461e-11	2.11508e-11	1.95069e-11	1.30392e-11	1.79194e-11	2.40665e-11	1.78625e-11	3.81863e-11	1.72799e-11	2.19444e-11	1.90118e-11	1.86156e-11	2.10948e-11	1.83961e-11	2.18486e-11
8.92	1.5737e-11	1.65193e-11	2.02923e-11	1.72678e-11	1.72524e-11	2.11559e-11	1.94781e-11	1.30349e-11	1.79161e-11	2.40678e-11	1.78729e-11	3.81872e-11	1.72994e-11	2.19432e-11	1.90112e-11	1.8618e-11	2.11111e-11	1.83952e-11	2.18564e-11
8.94	1.57484e-11	1.65334e-11	2.02919e-11	1.72675e-11	1.72557e-11	2.11644e-11	1.94726e-11	1.30371e-11	1.79235e-11	2.40627e-11	1.78736e-11	3.81862e-11	1.72965e-11	2.19473e-11	1.90121e-11	1.86206e-11	2.10952e-11	1.84034e-11	2.18571e-11
8.96	1.57355e-11	1.6525e-11	2.02906e-11	1.72658e-11	1.72515e-11	2.11655e-11	1.94841e-11	1.30387e-11	1.79194e-11	2.40656e-11	1.78736e-11	3.8187e-11	1.7292e-11	2.19437e-11	1.90128e-11	1.86196e-11	2.11093e-11	1.84027e-11	2.18542e-11
8.98	1.57335e-11	1.65243e-11	2.02961e-11	1.72689e-11	1.72571e-11	2.11642e-11	1.94761e-11	1.30381e-11	1.79181e-11	2.40694e-11	1.78788e-11	3.81827e-11	1.72877e-11	2.19413e-11	1.90127e-11	1.86197e-11	2.11076e-11	1.84071e-11	2.18553e-11
9	1.5737e-11	1.65312e-11	2.02893e-11	1.72618e-11	1.72519e-11	2.11608e-11	1.9478e-11	1.30364e-11	1.79145e-11	2.40703e-11	1.78759e-11	3.81841e-11	1.72845e-11	2.19421e-11	1.90176e-11	1.86201e-11	2.11008e-11	1.84002e-11	2.18543e-11
9.02	1.57453e-11	1.65208e-11	2.02969e-11	1.72672e-11	1.72561e-11	2.11549e-11	1.94899e-11	1.30399e-11	1.79208e-11	2.40692e-11	1.78708e-11	3.81841e-11	1.73106e-11	2.19332e-11	1.90206e-11	1.86154e-11	2.11118e-11	1.84017e-11	2.18608e-11
9.04	1.57413e-11	1.65146e-11	2.0295e-11	1.72626e-11	1.72545e-11	2.11534e-11	1.94577e-11	1.30355e-11	1.792e-11	2.40724e-11	1.78798e-11	3.81868e-11	1.72981e-11	2.19372e-11	1.90153e-11	1.86167e-11	2.11038e-11	1.83979e-11	2.18593e-11
9.06	1.57414e-11	1.65157e-11	2.02918e-11	1.72632e-11	1.72569e-11	2.11522e-11	1.95007e-11	1.30328e-11	1.7919e-11	2.40686e-11	1.78764e-11	3.81859e-11	1.73009e-11	2.19418e-11	1.90129e-11	1.86139e-11	2.11027e-11	1.83984e-11	2.1853e-11
9.08	1.57422e-11	1.65149e-11	2.02915e-11	1.72563e-11	1.72525e-11	2.1161e-11	1.94536e-11	1.30301e-11	1.79212e-11	2.40693e-11	1.78739e-11	3.81861e-11	1.72957e-11	2.19396e-11	1.9025e-11	1.86107e-11	2.10939e-11	1.84012e-11	2.18497e-11
9.1	1.57341e-11	1.65123e-11	2.02908e-11	1.72615e-11	1.72586e-11	2.11562e-11	1.95043e-11	1.30367e-11	1.79128e-11	2.40725e-11	1.78695e-11	3.81862e-11	1.72886e-11	2.19402e-11	1.90169e-11	1.86193e-11	2.10997e-11	1.84027e-11	2.18574e-11
9.12	1.57432e-11	1.65203e-11	2.02948e-11	1.72636e-11	1.72518e-11	2.1155e-11	1.94879e-11	1.30375e-11	1.79171e-11	2.40711e-11	1.78736e-11	3.81846e-11	1.73091e-11	2.19388e-11	1.90148e-11	1.86188e-11	2.11005e-11	1.84063e-11	2.18552e-11
9.14	1.57365e-11	1.65227e-11	2.02973e-11	1.72645e-11	1.72511e-11	2.11513e-11	1.94839e-11	1.30351e-11	1.79203e-11	2.40712e-11	1.78798e-11	3.81742e-11	1.73181e-11	2.19443e-11	1.90227e-11	1.86175e-11	2.11034e-11	1.84017e-11	2.18506e-11
9.16	1.57414e-11	1.6514e-11	2.02933e-11	1.727e-11	1.72504e-11	2.11468e-11	1.94731e-11	1.30374e-11	1.792e-11	2.40721e-11	1.78757e-11	3.81913e-11	1.73011e-11	2.19432e-11	1.9025e-11	1.8616e-11	2.11051e-11	1.84018e-11	2.18523e-11
9.18	1.57438e-11	1.65166e-11	2.03023e-11	1.72685e-11	1.72522e-11	2.11456e-11	1.94671e-11	1.30368e-11	1.79194e-11	2.40689e-11	1.7873e-11	3.81889e-11	1.73043e-11	2.19428e-11	1.90096e-11	1.86141e-11	2.11031e-11	1.84021e-11	2.18496e-11
9.2	1.57401e-11	1.65183e-11	2.02999e-11	1.72641e-11	1.72564e-11	2.11464e-11	1.9484e-11	1.30337e-11	1.79146e-11	2.40689e-11	1.78772e-11	3.81821e-11	1.7303e-11	2.19404e-11	1.90131e-11	1.86191e-11	2.11037e-11	1.84044e-11	2.18586e-11
9.22	1.57499e-11	1.65164e-11	2.02949e-11	1.72627e-11	1.72524e-11	2.11494e-11	1.94593e-11	1.30351e-11	1.79211e-11	2.40696e-11	1.78717e-11	3.81915e-11	1.73282e-11	2.19468e-11	1.90147e-11	1.86176e-11	2.11062e-11	1.84046e-11	2.18576e-11
9.24	1.57405e-11	1.65152e-11	2.03001e-11	1.72674e-11	1.72507e-11	2.11916e-11	1.94479e-11	1.30418e-11	1.79209e-11	2.4073e-11	1.78716e-11	3.81857e-11	1.73129e-11	2.1944e-11	1.90103e-11	1.86209e-11	2.11023e-11	1.84075e-11	2.18519e-11
9.26	1.57477e-11	1.65211e-11	2.02923e-11	1.72648e-11	1.72558e-11	2.12349e-11	1.94573e-11	1.30363e-11	1.79197e-11	2.40708e-11	1.78773e-11	3.81914e-11	1.73225e-11	2.19433e-11	1.9017e-11	1.86131e-11	2.11025e-11	1.84016e-11	2.1861e-11
9.28	1.57503e-11	1.65209e-11	2.02944e-11	1.72653e-11	1.72536e-11	2.12703e-11	1.94569e-11	1.3037e-11	1.79219e-11	2.40768e-11	1.78724e-11	3.81946e-11	1.72998e-11	2.19392e-11	1.90148e-11	1.86183e-11	2.11178e-11	1.84064e-11	2.18632e-11
9.3	1.5731e-11	1.65191e-11	2.02946e-11	1.72649e-11	1.72516e-11	2.12808e-11	1.94793e-11	1.30345e-11	1.79215e-11	2.40749e-11	1.78716e-11	3.81795e-11	1.72895e-11	2.19465e-11	1.90209e-11	1.86177e-11	2.11095e-11	1.84005e-11	2.18525e-11
9.32	1.57298e-11	1.65142e-11	2.0294e-11	1.72635e-11	1.72577e-11	2.12928e-11	1.94815e-11	1.30421e-11	1.79185e-11	2.40717e-11	1.78755e-11	3.81767e-11	1.73182e-11	2.19379e-11	1.90175e-11	1.86104e-11	2.11141e-11	1.84046e-11	2.18509e-11
9.34	1.57354e-11	1.65164e-11	2.02965e-11	1.72615e-11	1.72527e-11	2.13009e-11	1.94532e-11	1.30395e-11	1.79166e-11	2.40748e-11	1.78749e-11	3.81825e-11	1.73012e-11	2.19387e-11	1.90021e-11	1.86277e-11	2.11047e-11	1.8405e-11	2.18535e-11
9.36	1.57395e-11	1.65188e-11	2.02959e-11	1.72669e-11	1.72573e-11	2.13097e-11	1.94671e-11	1.30373e-11	1.79176e-11	2.40684e-11	1.78775e-11	3.8192e-11	1.73188e-11	2.19367e-11	1.90158e-11	1.86208e-11	2.10948e-11	1.83963e-11	2.18538e-11
9.38	1.57375e-11	1.65114e-11	2.02995e-11	1.72597e-11	1.72544e-11	2.13115e-11	1.9456e-11	1.3038e-11	1.79168e-11	2.40703e-11	1.78779e-11	3.81811e-11	1.73174e-11	2.19338e-11	1.90169e-11	1.86215e-11	2.10992e-11	1.8399e-11	2.18575e-11
9.4	1.57395e-11	1.65148e-11	2.02931e-11	1.7265e-11	1.72579e-11	2.13179e-11	1.94591e-11	1.30345e-11	1.79194e-11	2.4073e-11	1.78792e-11	3.81857e-11	1.7309e-11	2.19341e-11	1.90065e-11	1.86197e-11	2.10983e-11	1.84021e-11	2.18538e-11
9.42	1.57426e-11	1.65124e-11	2.03013e-11	1.72641e-11	1.72548e-11	2.13297e-11	1.94603e-11	1.30404e-11	1.79132e-11	2.40708e-11	1.78742e-11	3.81887e-11	1.73367e-11	2.19465e-11	1.90202e-11	1.86177e-11	2.11088e-11	1.83991e-11	2.18594e-11
9.44	1.57346e-11	1.6515e-11	2.03035e-11	1.7266e-11	1.72444e-11	2.13374e-11	1.94669e-11	1.30381e-11	1.79176e-11	2.40739e-11	1.78751e-11	3.81808e-11	1.73218e-11	2.19453e-11	1.901e-11	1.86209e-11	2.10977e-11	1.83974e-11	2.18529e-11
9.46	1.57419e-11	1.65112e-11	2.03013e-11	1.72629e-11	1.72573e-11	2.13384e-11	1.94848e-11	1.3035e-11	1.79152e-11	2.40689e-11	1.78711e-11	3.81824e-11	1.7306e-11	2.19416e-11	1.90118e-11	1.86199e-11	2.11047e-11	1.84036e-11	2.18569e-11
9.48	1.57297e-11	1.65177e-11	2.03034e-11	1.72593e-11	1.72504e-11	2.13387e-11	1.9474e-11	1.30366e-11	1.79176e-11	2.40722e-11	1.78724e-11	3.81874e-11	1.7312e-11	2.19387e-11	1.90199e-11	1.8621e-11	2.11056e-11	1.83993e-11	2.18532e-11
9.5	1.57276e-11	1.65162e-11	2.02938e-11	1.72608e-11	1.72603e-11	2.13406e-11	1.94555e-11	1.30387e-11	1.79153e-11	2.40696e-11	1.78744e-11	3.81833e-11	1.73126e-11	2.19442e-11	1.9008e-11	1.86183e-11	2.10969e-11	1.84013e-11	2.18582e-11
9.52	1.57398e-11	1.6516e-11	2.0298e-11	1.72628e-11	1.72558e-11	2.13509e-11	1.94515e-11	1.30423e-11	1.79166e-11	2.40682e-11	1.78755e-11	3.81829e-11	1.73217e-11	2.19467e-11	1.90156e-11	1.86163e-11	2.11001e-11	1.83951e-11	2.18517e-11
9.54	1.57357e-11	1.65224e-11	2.03027e-11	1.72616e-11	1.72529e-11	2.13412e-11	1.94476e-11	1.30408e-11	1.79171e-11	2.4069e-11	1.78737e-11	3.81801e-11	1.73096e-11	2.19426e-11	1.90136e-11	1.86211e-11	2.11018e-11	1.84005e-11	2.18494e-11
9.56	1.57323e-11	1.65061e-11	2.02999e-11	1.72634e-11	1.72481e-11	2.13704e-11	1.94561e-11	1.30373e-11	1.79196e-11	2.40745e-11	1.78793e-11	3.81769e-11	1.73008e-11	2.19405e-11	1.90121e-11	1.86243e-11	2.11042e-11	1.83995e-11	2.18482e-11
9.58	1.57347e-11	1.65178e-11	2.03016e-11	1.7263e-11	1.72564e-11	2.13665e-11	1.94573e-11	1.30391e-11	1.79112e-11	2.40688e-11	1.78765e-11	3.81794e-11	1.73103e-11	2.19408e-11	1.9023e-11	1.86175e-11	2.11042e-11	1.83915e-11	2.18516e-11
9.6	1.57402e-11	1.65193e-11	2.0305e-11	1.72667e-11	1.7255e-11	2.13714e-11	1.94587e-11	1.3034e-11	1.79134e-11	2.40671e-11	1.78776e-11	3.81845e-11	1.73167e-11	2.19404e-11	1.90159e-11	1.86185e-11	2.10997e-11	1.83979e-11	2.18535e-11
9.62	1.5724e-11	1.65191e-11	2.03056e-11	1.7265e-11	1.72491e-11	2.13782e-11	1.94505e-11	1.30379e-11	1.79172e-11	2.40708e-11	1.7878e-11	3.81867e-11	1.73138e-11	2.1939e-11	1.90085e-11	1.86211e-11	2.1099e-11	1.84015e-11	2.18487e-11
9.64	1.57292e-11	1.65148e-11	2.03075e-11	1.72628e-11	1.72558e-11	2.13828e-11	1.94622e-11	1.30429e-11	1.79254e-11	2.40723e-11	1.78727e-11	3.81873e-11	1.73141e-11	2.19403e-11	1.90092e-11	1.86137e-11	2.11036e-11	1.84115e-11	2.1854e-11
9.66	1.57458e-11	1.65218e-11	2.0304e-11	1.7259e-11	1.72527e-11	2.1379e-11	1.94546e-11	1.30372e-11	1.79176e-11	2.4069e-11	1.78738e-11	3.8181e-11	1.73021e-11	2.19421e-11	1.90136e-11	1.86136e-11	2.11104e-11	1.8406e-11	2.18495e-11
9.68	1.57424e-11	1.65189e-11	2.03078e-11	1.7262e-11	1.72566e-11	2.13831e-11	1.94275e-11	1.30381e-11	1.79153e-11	2.40733e-11	1.78801e-11	3.81862e-11	1.73124e-11	2.19441e-11	1.90056e-11	1.8616e-11	2.11045e-11	1.84066e-11	2.18495e-11
9.7	1.57457e-11	1.65078e-11	2.03038e-11	1.72635e-11	1.72512e-11	2.1383e-11	1.94243e-11	1.30388e-11	1.79198e-11	2.40741e-11	1.78756e-11	3.81908e-11	1.73202e-11	2.19374e-11	1.90126e-11	1.86183e-11	2.11103e-11	1.84076e-11	2.18501e-11
9.72	1.57389e-11	1.65155e-11	2.03065e-11	1.7263e-11	1.72539e-11	2.13727e-11	1.94601e-11	1.30388e-11	1.79244e-11	2.40715e-11	1.78765e-11	3.81866e-11	1.73234e-11	2.19458e-11	1.90115e-11	1.86162e-11	2.11028e-11	1.84116e-11	2.18517e-11
9.74	1.57287e-11	1.6526e-11	2.03073e-11	1.72623e-11	1.7254e-11	2.13871e-11	1.94391e-11	1.30337e-11	1.79192e-11	2.40753e-11	1.78747e-11	3.81818e-11	1.73336e-11	2.19403e-11	1.90172e-11	1.86116e-11	2.11062e-11	1.83996e-11	2.1857e-11
9.76	1.57384e-11	1.65166e-11	2.03037e-11	1.72604e-11	1.72462e-11	2.13908e-11	1.94274e-11	1.30378e-11	1.79232e-11	2.40734e-11	1.78719e-11	3.81941e-11	1.73434e-11	2.19432e-11	1.90243e-11	1.86156e-11	2.11555e-11	1.84069e-11	2.18535e-11
9.78	1.57374e-11	1.65179e-11	2.03047e-11	1.72606e-11	1.72556e-11	2.13956e-11	1.94551e-11	1.30395e-11	1.7915e-11	2.40655e-11	1.78737e-11	3.81903e-11	1.73262e-11	2.19411e-11	1.90137e-11	1.86191e-11	2.11141e-11	1.84013e-11	2.18441e-11
9.8	1.57438e-11	1.65209e-11	2.03083e-11	1.72644e-11	1.72522e-11	2.14045e-11	1.94416e-11	1.30422e-11	1.79193e-11	2.4071e-11	1.78728e-11	3.8188e-11	1.73098e-11	2.19359e-11	1.9012e-11	1.86177e-11	2.10992e-11	1.83992e-11	2.18589e-11
9.82	1.57362e-11	1.65177e-11	2.03055e-11	1.72639e-11	1.72543e-11	2.14019e-11	1.94377e-11	1.30403e-11	1.79193e-11	2.40711e-11	1.7877e-11	3.81829e-11	1.73233e-11	2.19346e-11	1.90131e-11	1.86181e-11	2.09176e-11	1.83999e-11	2.1848e-11
9.84	1.5737e-11	1.65183e-11	2.03043e-11	1.72662e-11	1.72529e-11	2.14028e-11	1.94255e-11	1.30391e-11	1.79179e-11	2.40707e-11	1.78734e-11	3.81815e-11	1.73486e-11	2.19453e-11	1.90114e-11	1.86157e-11	2.0718e-11	1.83978e-11	2.1852e-11
9.86	1.574e-11	1.65168e-11	2.03065e-11	1.72648e-11	1.72471e-11	2.13934e-11	1.94385e-11	1.30423e-11	1.79159e-11	2.40705e-11	1.78683e-11	3.81891e-11	1.7311e-11	2.19443e-11	1.90194e-11	1.8622e-11	2.07265e-11	1.83987e-11	2.18491e-11
9.88	1.57392e-11	1.65143e-11	2.03101e-11	1.72614e-11	1.72516e-11	2.13987e-11	1.94657e-11	1.30391e-11	1.79149e-11	2.4067e-11	1.78751e-11	3.81847e-11	1.73202e-11	2.19371e-11	1.90104e-11	1.86188e-11	2.07309e-11	1.8409e-11	2.18504e-11
9.9	1.57345e-11	1.6518e-11	2.03101e-11	1.72636e-11	1.7251e-11	2.13969e-11	1.9439e-11	1.30402e-11	1.79145e-11	2.40775e-11	1.78717e-11	3.81896e-11	1.73149e-11	2.19387e-11	1.90097e-11	1.86206e-11	2.07314e-11	1.84009e-11	2.18586e-11
9.92	1.57379e-11	1.65201e-11	2.03084e-11	1.72697e-11	1.72572e-11	2.14027e-11	1.94359e-11	1.30432e-11	1.79116e-11	2.40724e-11	1.78717e-11	3.81832e-11	1.72991e-11	2.1945e-11	1.90087e-11	1.86144e-11	2.07391e-11	1.84042e-11	2.18582e-11
9.94	1.57379e-11	1.65182e-11	2.03083e-11	1.72682e-11	1.72566e-11	2.14007e-11	1.94012e-11	1.30338e-11	1.7916e-11	2.40758e-11	1.78745e-11	3.81846e-11	1.73025e-11	2.19411e-11	1.90112e-11	1.86178e-11	2.07546e-11	1.84002e-11	2.18551e-11
9.96	1.57341e-11	1.65122e-11	2.03093e-11	1.7262e-11	1.72489e-11	2.14159e-11	1.94368e-11	1.30388e-11	1.79169e-11	2.40743e-11	1.78663e-11	3.81884e-11	1.7306e-11	2.19337e-11	1.90097e-11	1.86158e-11	2.0752e-11	1.84002e-11	2.18551e-11
9.98	1.57347e-11	1.65181e-11	2.03061e-11	1.72627e-11	1.72546e-11	2.14161e-11	1.94383e-11	1.30392e-11	1.79166e-11	2.40712e-11	1.78685e-11	3.81899e-11	1.73229e-11	2.19413e-11	1.90212e-11	1.86215e-11	2.07542e-11	1.83993e-11	2.18479e-11
10	1.57368e-11	1.65143e-11	2.03043e-11	1.72612e-11	1.7247e-11	2.14131e-11	1.94199e-11	1.30341e-11	1.79137e-11	2.40745e-11	1.78717e-11	3.81783e-11	1.73174e-11	2.19423e-11	1.90169e-11	1.86157e-11	2.07666e-11	1.8409e-11	2.1853e-11
10.02	1.57412e-11	1.65111e-11	2.03033e-11	1.72629e-11	1.72529e-11	2.1422e-11	1.9434e-11	1.30416e-11	1.79395e-11	2.40773e-11	1.78651e-11	3.81816e-11	1.73175e-11	2.19513e-11	1.90105e-11	1.86098e-11	2.07659e-11	1.84028e-11	2.18542e-11
10.04	1.57331e-11	1.65172e-11	2.03117e-11	1.72658e-11	1.72564e-11	2.14179e-11	1.9432e-11	1.3042e-11	1.79239e-11	2.40683e-11	1.78684e-11	3.81843e-11	1.73153e-11	2.19429e-11	1.90138e-11	1.86208e-11	2.07725e-11	1.84028e-11	2.18603e-11
10.06	1.57389e-11	1.6516e-11	2.03116e-11	1.72635e-11	1.72558e-11	2.14283e-11	1.94378e-11	1.30431e-11	1.79239e-11	2.40731e-11	1.78737e-11	3.81893e-11	1.73299e-11	2.19486e-11	1.90125e-11	1.86174e-11	2.07796e-11	1.8397e-11	2.1853e-11
10.08	1.57385e-11	1.65215e-11	2.03048e-11	1.7264e-11	1.72552e-11	2.14254e-11	1.94174e-11	1.30395e-11	1.79222e-11	2.40776e-11	1.78715e-11	3.8191e-11	1.73385e-11	2.19424e-11	1.90112e-11	1.86144e-11	2.0773e-11	1.84013e-11	2.18529e-11
10.1	1.57291e-11	1.65079e-11	2.0304e-11	1.72657e-11	1.72573e-11	2.14251e-11	1.94372e-11	1.30467e-11	1.79187e-11	2.40815e-11	1.78747e-11	3.81906e-11	1.7346e-11	2.19373e-11	1.90168e-11	1.86178e-11	2.07692e-11	1.84075e-11	2.18524e-11
10.12	1.57344e-11	1.65137e-11	2.03085e-11	1.72646e-11	1.72534e-11	2.14303e-11	1.94252e-11	1.30389e-11	1.79191e-11	2.40709e-11	1.78781e-11	3.81881e-11	1.73367e-11	2.19483e-11	1.90171e-11	1.86106e-11	2.07701e-11	1.84e-11	2.1852e-11
10.14	1.57259e-11	1.65144e-11	2.03067e-11	1.7262e-11	1.72579e-11	2.14307e-11	1.94263e-11	1.30446e-11	1.79192e-11	2.40756e-11	1.78747e-11	3.81845e-11	1.73106e-11	2.19455e-11	1.90168e-11	1.86139e-11	2.0781e-11	1.83997e-11	2.18541e-11
10.16	1.57262e-11	1.65023e-11	2.03125e-11	1.72632e-11	1.72543e-11	2.1433e-11	1.94413e-11	1.30385e-11	1.79159e-11	2.40675e-11	1.78773e-11	3.81819e-11	1.73098e-11	2.19421e-11	1.90162e-11	1.86138e-11	2.07704e-11	1.84036e-11	2.18651e-11
10.18	1.57391e-11	1.65106e-11	2.03097e-11	1.72664e-11	1.72563e-11	2.14324e-11	1.9407e-11	1.30465e-11	1.79162e-11	2.40742e-11	1.78803e-11	3.81839e-11	1.73223e-11	2.19428e-11	1.90135e-11	1.86167e-11	2.07666e-11	1.84007e-11	2.18554e-11
10.2	1.57461e-11	1.64371e-11	2.03079e-11	1.72687e-11	1.72563e-11	2.14384e-11	1.94117e-11	1.3041e-11	1.79239e-11	2.40749e-11	1.78715e-11	3.81805e-11	1.72939e-11	2.19493e-11	1.90143e-11	1.86137e-11	2.077e-11	1.84031e-11	2.18505e-11
10.22	1.57371e-11	1.63713e-11	2.03077e-11	1.72639e-11	1.72505e-11	2.14392e-11	1.94284e-11	1.30451e-11	1.79131e-11	2.40787e-11	1.78776e-11	3.81844e-11	1.73073e-11	2.1936e-11	1.90179e-11	1.86147e-11	2.07727e-11	1.84049e-11	2.18573e-11
10.24	1.57352e-11	1.63711e-11	2.03087e-11	1.72681e-11	1.72584e-11	2.14379e-11	1.94372e-11	1.30414e-11	1.79181e-11	2.40758e-11	1.78807e-11	3.81914e-11	1.73071e-11	2.19469e-11	1.90209e-11	1.8617e-11	2.07695e-11	1.8401e-11	2.18548e-11
10.26	1.57307e-11	1.63647e-11	2.03038e-11	1.72699e-11	1.7248e-11	2.14437e-11	1.94253e-11	1.30424e-11	1.79238e-11	2.40677e-11	1.78707e-11	3.81836e-11	1.73146e-11	2.19467e-11	1.90161e-11	1.86147e-11	2.0772e-11	1.84015e-11	2.18499e-11
10.28	1.57333e-11	1.63668e-11	2.0306e-11	1.72652e-11	1.72572e-11	2.14366e-11	1.9435e-11	1.30409e-11	1.79158e-11	2.40744e-11	1.78774e-11	3.81835e-11	1.73044e-11	2.19441e-11	1.90248e-11	1.86173e-11	2.0768e-11	1.84025e-11	2.18552e-11
10.3	1.57416e-11	1.63657e-11	2.03101e-11	1.7264e-11	1.72477e-11	2.14438e-11	1.94176e-11	1.30409e-11	1.79165e-11	2.40752e-11	1.78739e-11	3.81862e-11	1.73089e-11	2.19495e-11	1.90213e-11	1.86142e-11	2.07685e-11	1.84028e-11	2.18529e-11
10.32	1.57275e-11	1.63798e-11	2.03103e-11	1.72675e-11	1.72503e-11	2.14349e-11	1.94254e-11	1.30425e-11	1.79124e-11	2.40734e-11	1.78724e-11	3.81944e-11	1.73026e-11	2.19439e-11	1.90203e-11	1.86184e-11	2.07773e-11	1.83997e-11	2.18481e-11
10.34	1.57414e-11	1.63796e-11	2.03137e-11	1.72659e-11	1.72563e-11	2.14375e-11	1.9424e-11	1.30423e-11	1.79171e-11	2.40791e-11	1.78748e-11	3.81886e-11	1.7308e-11	2.19378e-11	1.90127e-11	1.8615e-11	2.07731e-11	1.84044e-11	2.18551e-11
10.36	1.57309e-11	1.63882e-11	2.03159e-11	1.72615e-11	1.72481e-11	2.14419e-11	1.94464e-11	1.30363e-11	1.79194e-11	2.40772e-11	1.78735e-11	3.81866e-11	1.73014e-11	2.19531e-11	1.90147e-11	1.86154e-11	2.07774e-11	1.84038e-11	2.18594e-11
10.38	1.57421e-11	1.638e-11	2.03089e-11	1.72624e-11	1.72511e-11	2.14532e-11	1.94413e-11	1.30473e-11	1.792e-11	2.40757e-11	1.78708e-11	3.81895e-11	1.73044e-11	2.19459e-11	1.90061e-11	1.86144e-11	2.07645e-11	1.84001e-11	2.18625e-11
10.4	1.57248e-11	1.6365e-11	2.03004e-11	1.72673e-11	1.72473e-11	2.1455e-11	1.94284e-11	1.3036e-11	1.79216e-11	2.40726e-11	1.78714e-11	3.81777e-11	1.73031e-11	2.19414e-11	1.90113e-11	1.86175e-11	2.07705e-11	1.83979e-11	2.18511e-11
10.42	1.5743e-11	1.63678e-11	2.03084e-11	1.72673e-11	1.72505e-11	2.14513e-11	1.94284e-11	1.30419e-11	1.79144e-11	2.40776e-11	1.78719e-11	3.8189e-11	1.7291e-11	2.19386e-11	1.90216e-11	1.86117e-11	2.07689e-11	1.84021e-11	2.18419e-11
10.44	1.57418e-11	1.63706e-11	2.03097e-11	1.7269e-11	1.72504e-11	2.14497e-11	1.9412e-11	1.30397e-11	1.79199e-11	2.40749e-11	1.78766e-11	3.81801e-11	1.72948e-11	2.19446e-11	1.90217e-11	1.86169e-11	2.07728e-11	1.8405e-11	2.18457e-11
10.46	1.57269e-11	1.63739e-11	2.03099e-11	1.72648e-11	1.72527e-11	2.14562e-11	1.94013e-11	1.30405e-11	1.79153e-11	2.40841e-11	1.78744e-11	3.81858e-11	1.7261e-11	2.19426e-11	1.9027e-11	1.86151e-11	2.07649e-11	1.84038e-11	2.18499e-11
10.48	1.57412e-11	1.63779e-11	2.03117e-11	1.72657e-11	1.72574e-11	2.14604e-11	1.94123e-11	1.30452e-11	1.79123e-11	2.4078e-11	1.78714e-11	3.81877e-11	1.72742e-11	2.19385e-11	1.90152e-11	1.86119e-11	2.07697e-11	1.83988e-11	2.18461e-11
10.5	1.57336e-11	1.63738e-11	2.03111e-11	1.72633e-11	1.72492e-11	2.14587e-11	1.94078e-11	1.30472e-11	1.79122e-11	2.40808e-11	1.7874e-11	3.81823e-11	1.72812e-11	2.19461e-11	1.90216e-11	1.86174e-11	2.07694e-11	1.8403e-11	2.18567e-11
10.52	1.57375e-11	1.63759e-11	2.03114e-11	1.72579e-11	1.72187e-11	2.14561e-11	1.94195e-11	1.30404e-11	1.79163e-11	2.40734e-11	1.78757e-11	3.81857e-11	1.72855e-11	2.19402e-11	1.90173e-11	1.86095e-11	2.07787e-11	1.84062e-11	2.18542e-11
10.54	1.57406e-11	1.6379e-11	2.03121e-11	1.72685e-11	1.72124e-11	2.14488e-11	1.94346e-11	1.30382e-11	1.79165e-11	2.40771e-11	1.78742e-11	3.8186e-11	1.72848e-11	2.19429e-11	1.90097e-11	1.86192e-11	2.07684e-11	1.84042e-11	2.1854e-11
10.56	1.57366e-11	1.63712e-11	2.0311e-11	1.72631e-11	1.72133e-11	2.14602e-11	1.94186e-11	1.30393e-11	1.79204e-11	2.40792e-11	1.7875e-11	3.81813e-11	1.72907e-11	2.19433e-11	1.90228e-11	1.86194e-11	2.07754e-11	1.84014e-11	2.18541e-11
10.58	1.57477e-11	1.63665e-11	2.03086e-11	1.72631e-11	1.72145e-11	2.14616e-11	1.94299e-11	1.30406e-11	1.79159e-11	2.40667e-11	1.78773e-11	3.81842e-11	1.72889e-11	2.19395e-11	1.90211e-11	1.86159e-11	2.07841e-11	1.84054e-11	2.18472e-11
10.6	1.57433e-11	1.63877e-11	2.03135e-11	1.72618e-11	1.72077e-11	2.14609e-11	1.94316e-11	1.30431e-11	1.79131e-11	2.407e-11	1.78735e-11	3.81833e-11	1.72874e-11	2.19399e-11	1.90148e-11	1.86174e-11	2.07809e-11	1.84059e-11	2.185e-11
10.62	1.57355e-11	1.63686e-11	2.03119e-11	1.72652e-11	1.7207e-11	2.1464e-11	1.94001e-11	1.30457e-11	1.79146e-11	2.40736e-11	1.78705e-11	3.81817e-11	1.73038e-11	2.19436e-11	1.90188e-11	1.86194e-11	2.07768e-11	1.84037e-11	2.18536e-11
10.64	1.57398e-11	1.6371e-11	2.03113e-11	1.72662e-11	1.72085e-11	2.14608e-11	1.93971e-11	1.30424e-11	1.79169e-11	2.40746e-11	1.78723e-11	3.81955e-11	1.73145e-11	2.19423e-11	1.90228e-11	1.86172e-11	2.07789e-11	1.83976e-11	2.18447e-11
10.66	1.57381e-11	1.63701e-11	2.03179e-11	1.7265e-11	1.72081e-11	2.14561e-11	1.94295e-11	1.30446e-11	1.79129e-11	2.4076e-11	1.7864e-11	3.81938e-11	1.73098e-11	2.19463e-11	1.90137e-11	1.86223e-11	2.07802e-11	1.84012e-11	2.18431e-11
10.68	1.57321e-11	1.63681e-11	2.03073e-11	1.72659e-11	1.72072e-11	2.14596e-11	1.94177e-11	1.30402e-11	1.79169e-11	2.40686e-11	1.78774e-11	3.81821e-11	1.73085e-11	2.19384e-11	1.9018e-11	1.86151e-11	2.07789e-11	1.83984e-11	2.18467e-11
10.7	1.57316e-11	1.63736e-11	2.03168e-11	1.72666e-11	1.72131e-11	2.14672e-11	1.94187e-11	1.30405e-11	1.79224e-11	2.40725e-11	1.78759e-11	3.81806e-11	1.73023e-11	2.19465e-11	1.9026e-11	1.86151e-11	2.07825e-11	1.84045e-11	2.18519e-11
10.72	1.57422e-11	1.63643e-11	2.03153e-11	1.72572e-11	1.72073e-11	2.14667e-11	1.94161e-11	1.3041e-11	1.79198e-11	2.40698e-11	1.78788e-11	3.81787e-11	1.72935e-11	2.194e-11	1.90259e-11	1.86188e-11	2.07789e-11	1.83997e-11	2.18479e-11
10.74	1.57383e-11	1.63713e-11	2.03081e-11	1.72624e-11	1.72064e-11	2.14739e-11	1.94057e-11	1.30413e-11	1.79174e-11	2.40737e-11	1.78771e-11	3.8189e-11	1.72796e-11	2.19376e-11	1.90117e-11	1.86205e-11	2.07743e-11	1.84039e-11	2.18505e-11
10.76	1.57382e-11	1.63747e-11	2.03135e-11	1.7265e-11	1.72061e-11	2.14625e-11	1.94132e-11	1.30413e-11	1.79175e-11	2.40686e-11	1.7875e-11	3.81828e-11	1.72773e-11	2.1947e-11	1.90151e-11	1.86191e-11	2.07878e-11	1.84018e-11	2.18482e-11
10.78	1.57492e-11	1.63771e-11	2.03084e-11	1.72102e-11	1.72078e-11	2.14599e-11	1.93965e-11	1.30448e-11	1.7919e-11	2.40751e-11	1.78739e-11	3.81844e-11	1.72936e-11	2.19456e-11	1.90213e-11	1.86195e-11	2.07795e-11	1.83999e-11	2.18437e-11
10.8	1.57367e-11	1.63821e-11	2.03104e-11	1.70626e-11	1.72096e-11	2.14754e-11	1.94111e-11	1.30421e-11	1.7914e-11	2.40697e-11	1.78722e-11	3.81851e-11	1.73248e-11	2.1944e-11	1.90173e-11	1.862e-11	2.07872e-11	1.84036e-11	2.1853e-11
10.82	1.57379e-11	1.63763e-11	2.03152e-11	1.70408e-11	1.72077e-11	2.14793e-11	1.94218e-11	1.30377e-11	1.79156e-11	2.40731e-11	1.78723e-11	3.81851e-11	1.73077e-11	2.19429e-11	1.90185e-11	1.8621e-11	2.07798e-11	1.84031e-11	2.18556e-11
10.84	1.57594e-11	1.63691e-11	2.03065e-11	1.70333e-11	1.72025e-11	2.14685e-11	1.94111e-11	1.3046e-11	1.79165e-11	2.40727e-11	1.78737e-11	3.81806e-11	1.73014e-11	2.19456e-11	1.90217e-11	1.86168e-11	2.07807e-11	1.83969e-11	2.18527e-11
10.86	1.57472e-11	1.63814e-11	2.03156e-11	1.70289e-11	1.72033e-11	2.14791e-11	1.93976e-11	1.30457e-11	1.79184e-11	2.40731e-11	1.78703e-11	3.81836e-11	1.72929e-11	2.19398e-11	1.90148e-11	1.86179e-11	2.07833e-11	1.84014e-11	2.18502e-11
10.88	1.57409e-11	1.63681e-11	2.0316e-11	1.70232e-11	1.72042e-11	2.14786e-11	1.94046e-11	1.30437e-11	1.79128e-11	2.40708e-11	1.78721e-11	3.8182e-11	1.73071e-11	2.19396e-11	1.90289e-11	1.86182e-11	2.07802e-11	1.84036e-11	2.18512e-11
10.9	1.57424e-11	1.63734e-11	2.03147e-11	1.70244e-11	1.72015e-11	2.14779e-11	1.94412e-11	1.30386e-11	1.79125e-11	2.40692e-11	1.78733e-11	3.81908e-11	1.73013e-11	2.19461e-11	1.90215e-11	1.86182e-11	2.07778e-11	1.84003e-11	2.185e-11
10.92	1.57389e-11	1.63736e-11	2.03128e-11	1.70207e-11	1.72057e-11	2.1484e-11	1.94223e-11	1.3043e-11	1.79166e-11	2.40769e-11	1.78766e-11	3.81834e-11	1.72987e-11	2.1943e-11	1.90121e-11	1.86165e-11	2.07817e-11	1.84023e-11	2.18429e-11
10.94	1.57384e-11	1.63792e-11	2.03123e-11	1.70232e-11	1.72062e-11	2.14816e-11	1.94101e-11	1.30405e-11	1.79182e-11	2.40771e-11	1.78744e-11	3.81844e-11	1.73062e-11	2.19411e-11	1.9028e-11	1.86164e-11	2.0786e-11	1.84051e-11	2.18533e-11
10.96	1.57389e-11	1.63762e-11	2.03116e-11	1.7028e-11	1.72043e-11	2.14803e-11	1.9411e-11	1.30424e-11	1.79196e-11	2.40813e-11	1.78838e-11	3.81845e-11	1.73127e-11	2.19457e-11	1.90196e-11	1.86189e-11	2.07833e-11	1.84016e-11	2.18481e-11
10.98	1.57407e-11	1.63626e-11	2.03138e-11	1.70242e-11	1.72007e-11	2.14852e-11	1.94168e-11	1.30367e-11	1.79218e-11	2.40735e-11	1.78706e-11	3.81895e-11	1.73145e-11	2.19404e-11	1.90171e-11	1.86156e-11	2.07958e-11	1.83983e-11	2.18516e-11
11	1.57409e-11	1.63742e-11	2.03153e-11	1.70263e-11	1.72044e-11	2.14813e-11	1.9406e-11	1.30434e-11	1.79164e-11	2.40821e-11	1.78776e-11	3.81791e-11	1.73233e-11	2.19451e-11	1.90215e-11	1.86168e-11	2.07882e-11	1.84051e-11	2.18485e-11
11.02	1.57437e-11	1.6375e-11	2.0318e-11	1.7025e-11	1.72095e-11	2.1482e-11	1.93856e-11	1.30378e-11	1.7915e-11	2.40821e-11	1.78729e-11	3.81792e-11	1.73031e-11	2.19464e-11	1.90119e-11	1.86165e-11	2.079e-11	1.84083e-11	2.18362e-11
11.04	1.57387e-11	1.63783e-11	2.03141e-11	1.70287e-11	1.72088e-11	2.14894e-11	1.93831e-11	1.30459e-11	1.79199e-11	2.40751e-11	1.78694e-11	3.81883e-11	1.73078e-11	2.19403e-11	1.90201e-11	1.86164e-11	2.07849e-11	1.84008e-11	2.18436e-11
11.06	1.57536e-11	1.63624e-11	2.03143e-11	1.70303e-11	1.72034e-11	2.14848e-11	1.9404e-11	1.30429e-11	1.79182e-11	2.4076e-11	1.78744e-11	3.81867e-11	1.73016e-11	2.1947e-11	1.9019e-11	1.86127e-11	2.07864e-11	1.84009e-11	2.18489e-11
11.08	1.57376e-11	1.63755e-11	2.0321e-11	1.70301e-11	1.72055e-11	2.14927e-11	1.9413e-11	1.3039e-11	1.79122e-11	2.40743e-11	1.78745e-11	3.8191e-11	1.73135e-11	2.19447e-11	1.90072e-11	1.86174e-11	2.0781e-11	1.84044e-11	2.18477e-11
11.1	1.57451e-11	1.63853e-11	2.03176e-11	1.7026e-11	1.7203e-11	2.14864e-11	1.94113e-11	1.3046e-11	1.79181e-11	2.40773e-11	1.78751e-11	3.81795e-11	1.73007e-11	2.19434e-11	1.9024e-11	1.86152e-11	2.07939e-11	1.84028e-11	2.18477e-11
11.12	1.57516e-11	1.63771e-11	2.03164e-11	1.70297e-11	1.72054e-11	2.14826e-11	1.94084e-11	1.30427e-11	1.79126e-11	2.40746e-11	1.78738e-11	3.81849e-11	1.72962e-11	2.19523e-11	1.90212e-11	1.86168e-11	2.0796e-11	1.84093e-11	2.18515e-11
11.14	1.57452e-11	1.63803e-11	2.03113e-11	1.70302e-11	1.7209e-11	2.14866e-11	1.94243e-11	1.30465e-11	1.79221e-11	2.40749e-11	1.78763e-11	3.81875e-11	1.72955e-11	2.19476e-11	1.902e-11	1.86171e-11	2.07911e-11	1.84081e-11	2.18386e-11
11.16	1.57406e-11	1.63798e-11	2.0312e-11	1.70372e-11	1.72047e-11	2.14887e-11	1.93905e-11	1.30418e-11	1.79192e-11	2.40761e-11	1.78692e-11	3.8187e-11	1.72959e-11	2.19437e-11	1.90214e-11	1.86177e-11	2.078e-11	1.83999e-11	2.18454e-11
11.18	1.57601e-11	1.63799e-11	2.03144e-11	1.7029e-11	1.72048e-11	2.14834e-11	1.94073e-11	1.30437e-11	1.79161e-11	2.40723e-11	1.7874e-11	3.81888e-11	1.7298e-11	2.19427e-11	1.90228e-11	1.86161e-11	2.07876e-11	1.84033e-11	2.18512e-11
11.2	1.57494e-11	1.63751e-11	2.03215e-11	1.70335e-11	1.72053e-11	2.14972e-11	1.93921e-11	1.30445e-11	1.79137e-11	2.40766e-11	1.78794e-11	3.81794e-11	1.73056e-11	2.19412e-11	1.90176e-11	1.86116e-11	2.07816e-11	1.84048e-11	2.18489e-11
11.22	1.57516e-11	1.63704e-11	2.03203e-11	1.70324e-11	1.72088e-11	2.14946e-11	1.93869e-11	1.30396e-11	1.79159e-11	2.40745e-11	1.7873e-11	3.8185e-11	1.73012e-11	2.19444e-11	1.90132e-11	1.86151e-11	2.07789e-11	1.84071e-11	2.18513e-11
11.24	1.57627e-11	1.63783e-11	2.03184e-11	1.70252e-11	1.72012e-11	2.14833e-11	1.94044e-11	1.30395e-11	1.79168e-11	2.40755e-11	1.78738e-11	3.81848e-11	1.72928e-11	2.19358e-11	1.90247e-11	1.8616e-11	2.07865e-11	1.84048e-11	2.18413e-11
11.26	1.57459e-11	1.63762e-11	2.03173e-11	1.70235e-11	1.72015e-11	2.14866e-11	1.93903e-11	1.30404e-11	1.79128e-11	2.40737e-11	1.7872e-11	3.81869e-11	1.72924e-11	2.19391e-11	1.9017e-11	1.86166e-11	2.07837e-11	1.84045e-11	2.18397e-11
11.28	1.57473e-11	1.63783e-11	2.0321e-11	1.70294e-11	1.71972e-11	2.14906e-11	1.94075e-11	1.30426e-11	1.79167e-11	2.40777e-11	1.78736e-11	3.81899e-11	1.73008e-11	2.19406e-11	1.90238e-11	1.86165e-11	2.07879e-11	1.84057e-11	2.18564e-11
11.3	1.57468e-11	1.63795e-11	2.03107e-11	1.70337e-11	1.72033e-11	2.14858e-11	1.94145e-11	1.30449e-11	1.79152e-11	2.40762e-11	1.78757e-11	3.81886e-11	1.73071e-11	2.19416e-11	1.90167e-11	1.86156e-11	2.07949e-11	1.84055e-11	2.18446e-11
11.32	1.57461e-11	1.63649e-11	2.03145e-11	1.70208e-11	1.72021e-11	2.14934e-11	1.93838e-11	1.30378e-11	1.79126e-11	2.40775e-11	1.78733e-11	3.8173e-11	1.73047e-11	2.19425e-11	1.90245e-11	1.86183e-11	2.07952e-11	1.83973e-11	2.18581e-11
11.34	1.57493e-11	1.63754e-11	2.03158e-11	1.70277e-11	1.71993e-11	2.14901e-11	1.9419e-11	1.30446e-11	1.79142e-11	2.40692e-11	1.7876e-11	3.81817e-11	1.73029e-11	2.19529e-11	1.90177e-11	1.86189e-11	2.07907e-11	1.84035e-11	2.18448e-11
11.36	1.57402e-11	1.63792e-11	2.03249e-11	1.70274e-11	1.72023e-11	2.14851e-11	1.94169e-11	1.30421e-11	1.79191e-11	2.40722e-11	1.78739e-11	3.81836e-11	1.7307e-11	2.194e-11	1.90126e-11	1.86167e-11	2.07902e-11	1.8401e-11	2.18522e-11
11.38	1.57392e-11	1.63705e-11	2.03218e-11	1.70266e-11	1.71985e-11	2.14841e-11	1.93968e-11	1.3047e-11	1.79146e-11	2.40758e-11	1.78787e-11	3.81985e-11	1.7307e-11	2.19483e-11	1.90105e-11	1.86161e-11	2.07874e-11	1.84035e-11	2.18436e-11
11.4	1.57381e-11	1.63742e-11	2.03234e-11	1.70263e-11	1.72131e-11	2.14893e-11	1.94045e-11	1.3039e-11	1.79144e-11	2.40781e-11	1.78767e-11	3.81867e-11	1.72862e-11	2.19451e-11	1.90118e-11	1.86202e-11	2.07861e-11	1.84035e-11	2.18504e-11
11.42	1.57435e-11	1.63722e-11	2.03191e-11	1.70251e-11	1.72057e-11	2.14904e-11	1.93994e-11	1.30441e-11	1.79175e-11	2.40804e-11	1.78721e-11	3.81864e-11	1.73056e-11	2.19445e-11	1.90139e-11	1.86147e-11	2.0792e-11	1.84032e-11	2.18496e-11
11.44	1.57327e-11	1.63755e-11	2.03128e-11	1.70283e-11	1.72051e-11	2.14887e-11	1.9381e-11	1.30402e-11	1.79111e-11	2.4072e-11	1.78751e-11	3.81922e-11	1.72993e-11	2.19454e-11	1.90179e-11	1.86179e-11	2.07932e-11	1.84083e-11	2.18494e-11
11.46	1.57308e-11	1.63688e-11	2.03237e-11	1.70288e-11	1.72005e-11	2.14939e-11	1.9386e-11	1.30443e-11	1.79181e-11	2.40765e-11	1.78726e-11	3.81825e-11	1.73088e-11	2.19413e-11	1.90144e-11	1.86167e-11	2.07974e-11	1.83975e-11	2.1856e-11
11.48	1.57288e-11	1.63693e-11	2.03236e-11	1.70204e-11	1.71996e-11	2.14885e-11	1.93842e-11	1.30423e-11	1.79163e-11	2.40765e-11	1.78755e-11	3.81846e-11	1.73024e-11	2.19489e-11	1.90233e-11	1.86162e-11	2.07975e-11	1.83971e-11	2.18571e-11
11.5	1.57242e-11	1.63718e-11	2.03208e-11	1.70233e-11	1.7194e-11	2.14982e-11	1.94214e-11	1.30455e-11	1.79167e-11	2.4074e-11	1.78763e-11	3.8188e-11	1.72925e-11	2.19447e-11	1.90138e-11	1.86178e-11	2.07942e-11	1.8412e-11	2.18526e-11
11.52	1.57311e-11	1.6377e-11	2.03182e-11	1.70231e-11	1.72022e-11	2.14958e-11	1.94077e-11	1.3046e-11	1.79193e-11	2.40783e-11	1.78697e-11	3.81822e-11	1.72862e-11	2.19542e-11	1.9024e-11	1.86142e-11	2.07864e-11	1.84015e-11	2.18573e-11
11.54	1.57302e-11	1.63638e-11	2.03161e-11	1.70238e-11	1.72026e-11	2.14912e-11	1.94188e-11	1.30434e-11	1.79161e-11	2.40743e-11	1.78738e-11	3.8186e-11	1.72972e-11	2.1944e-11	1.90152e-11	1.86164e-11	2.08023e-11	1.83993e-11	2.1851e-11
11.56	1.574e-11	1.63686e-11	2.03164e-11	1.70248e-11	1.72018e-11	2.14936e-11	1.93846e-11	1.30388e-11	1.79145e-11	2.40677e-11	1.78703e-11	3.81786e-11	1.72924e-11	2.19381e-11	1.90232e-11	1.86257e-11	2.07829e-11	1.84004e-11	2.18466e-11
11.58	1.57324e-11	1.63698e-11	2.03268e-11	1.70222e-11	1.72038e-11	2.1501e-11	1.93968e-11	1.30429e-11	1.79129e-11	2.40698e-11	1.78726e-11	3.81775e-11	1.72952e-11	2.19441e-11	1.90179e-11	1.86181e-11	2.07864e-11	1.84035e-11	2.18541e-11
11.6	1.5721e-11	1.63804e-11	2.03166e-11	1.70207e-11	1.71994e-11	2.1494e-11	1.93949e-11	1.30445e-11	1.79102e-11	2.4067e-11	1.78753e-11	3.81847e-11	1.72915e-11	2.19468e-11	1.90186e-11	1.86141e-11	2.07958e-11	1.83975e-11	2.1852e-11
11.62	1.57389e-11	1.63724e-11	2.03184e-11	1.70198e-11	1.71978e-11	2.14969e-11	1.93775e-11	1.30474e-11	1.7913e-11	2.40702e-11	1.7878e-11	3.8182e-11	1.73013e-11	2.19513e-11	1.90227e-11	1.86167e-11	2.07914e-11	1.83981e-11	2.18499e-11
11.64	1.57327e-11	1.63656e-11	2.03241e-11	1.7021e-11	1.71998e-11	2.15015e-11	1.93916e-11	1.30456e-11	1.79121e-11	2.40749e-11	1.787e-11	3.81885e-11	1.72911e-11	2.19481e-11	1.90296e-11	1.86133e-11	2.07915e-11	1.83967e-11	2.18544e-11
11.66	1.5732e-11	1.63711e-11	2.03246e-11	1.70227e-11	1.71939e-11	2.15071e-11	1.94008e-11	1.30386e-11	1.7913e-11	2.40668e-11	1.78762e-11	3.81799e-11	1.72885e-11	2.1946e-11	1.90169e-11	1.86186e-11	2.07865e-11	1.83938e-11	2.18526e-11
11.68	1.57445e-11	1.63675e-11	2.03267e-11	1.70244e-11	1.72029e-11	2.15122e-11	1.93766e-11	1.30391e-11	1.79115e-11	2.40733e-11	1.78738e-11	3.81792e-11	1.7287e-11	2.19488e-11	1.90221e-11	1.86156e-11	2.07953e-11	1.83964e-11	2.18569e-11
11.7	1.57313e-11	1.63718e-11	2.03214e-11	1.70232e-11	1.72022e-11	2.14993e-11	1.93855e-11	1.30443e-11	1.79153e-11	2.40769e-11	1.78764e-11	3.81782e-11	1.72854e-11	2.19442e-11	1.9012e-11	1.86184e-11	2.07947e-11	1.84054e-11	2.18552e-11
11.72	1.57439e-11	1.63758e-11	2.03133e-11	1.70255e-11	1.72013e-11	2.15029e-11	1.93685e-11	1.30367e-11	1.79199e-11	2.40752e-11	1.78766e-11	3.81874e-11	1.72803e-11	2.19459e-11	1.90276e-11	1.86155e-11	2.07839e-11	1.83978e-11	2.18509e-11
11.74	1.57384e-11	1.63745e-11	2.03157e-11	1.70237e-11	1.72125e-11	2.15042e-11	1.93489e-11	1.30427e-11	1.79157e-11	2.40701e-11	1.78736e-11	3.81901e-11	1.72869e-11	2.19428e-11	1.90168e-11	1.86161e-11	2.07965e-11	1.84051e-11	2.18561e-11
11.76	1.57359e-11	1.63642e-11	2.03172e-11	1.7018e-11	1.72004e-11	2.15067e-11	1.93731e-11	1.30439e-11	1.79168e-11	2.408e-11	1.78732e-11	3.81922e-11	1.72861e-11	2.1948e-11	1.90221e-11	1.86114e-11	2.07907e-11	1.8403e-11	2.18566e-11
11.78	1.57298e-11	1.63593e-11	2.03179e-11	1.70264e-11	1.72007e-11	2.14948e-11	1.93643e-11	1.30454e-11	1.79181e-11	2.40758e-11	1.78744e-11	3.81877e-11	1.72795e-11	2.19412e-11	1.90193e-11	1.86213e-11	2.0796e-11	1.84059e-11	2.18575e-11
11.8	1.57286e-11	1.6368e-11	2.03122e-11	1.70263e-11	1.72021e-11	2.14984e-11	1.93651e-11	1.30434e-11	1.79193e-11	2.40713e-11	1.78725e-11	3.81925e-11	1.72879e-11	2.19441e-11	1.90105e-11	1.86163e-11	2.07933e-11	1.84013e-11	2.1856e-11
11.82	1.5736e-11	1.63692e-11	2.03098e-11	1.70204e-11	1.72016e-11	2.15045e-11	1.93725e-11	1.30421e-11	1.79171e-11	2.40746e-11	1.78747e-11	3.8184e-11	1.72709e-11	2.19462e-11	1.90156e-11	1.86205e-11	2.08015e-11	1.84004e-11	2.18556e-11
11.84	1.57428e-11	1.63637e-11	2.03067e-11	1.70206e-11	1.72065e-11	2.15049e-11	1.93966e-11	1.30426e-11	1.79095e-11	2.40732e-11	1.7878e-11	3.81819e-11	1.72935e-11	2.19439e-11	1.90105e-11	1.86126e-11	2.07923e-11	1.84046e-11	2.1858e-11
11.86	1.5735e-11	1.63662e-11	2.03118e-11	1.70224e-11	1.72059e-11	2.1507e-11	1.93848e-11	1.3042e-11	1.79115e-11	2.40696e-11	1.78765e-11	3.81948e-11	1.73001e-11	2.19457e-11	1.90226e-11	1.86185e-11	2.07939e-11	1.84004e-11	2.18514e-11
11.88	1.57324e-11	1.63614e-11	2.03087e-11	1.70234e-11	1.72063e-11	2.15136e-11	1.93968e-11	1.30428e-11	1.79093e-11	2.40757e-11	1.78739e-11	3.81868e-11	1.72925e-11	2.1947e-11	1.9026e-11	1.86143e-11	2.0797e-11	1.84055e-11	2.18503e-11
11.9	1.57394e-11	1.63725e-11	2.03085e-11	1.70199e-11	1.71993e-11	2.151e-11	1.93926e-11	1.3039e-11	1.79082e-11	2.40862e-11	1.78729e-11	3.81859e-11	1.72852e-11	2.1948e-11	1.90187e-11	1.86143e-11	2.07954e-11	1.84001e-11	2.18472e-11
11.92	1.57393e-11	1.63637e-11	2.03092e-11	1.70185e-11	1.72011e-11	2.15197e-11	1.94027e-11	1.30447e-11	1.79174e-11	2.40773e-11	1.78686e-11	3.8189e-11	1.72986e-11	2.1939e-11	1.90098e-11	1.86142e-11	2.0789e-11	1.84009e-11	2.18557e-11
11.94	1.57406e-11	1.63731e-11	2.03132e-11	1.70219e-11	1.72029e-11	2.1512e-11	1.93905e-11	1.30406e-11	1.79093e-11	2.40756e-11	1.78748e-11	3.81937e-11	1.73015e-11	2.19438e-11	1.90135e-11	1.86165e-11	2.079e-11	1.83984e-11	2.18433e-11
11.96	1.5735e-11	1.6372e-11	2.03088e-11	1.70165e-11	1.71971e-11	2.15123e-11	1.94125e-11	1.30467e-11	1.79145e-11	2.40781e-11	1.78744e-11	3.8187e-11	1.72822e-11	2.19474e-11	1.90171e-11	1.86203e-11	2.07963e-11	1.83995e-11	2.18615e-11
11.98	1.57205e-11	1.63753e-11	2.0307e-11	1.70177e-11	1.71997e-11	2.15066e-11	1.93975e-11	1.3042e-11	1.79145e-11	2.40773e-11	1.78682e-11	3.81851e-11	1.73045e-11	2.19471e-11	1.90205e-11	1.86116e-11	2.07903e-11	1.84017e-11	2.18509e-11
12	1.57312e-11	1.6371e-11	2.0307e-11	1.702e-11	1.72006e-11	2.15079e-11	1.93832e-11	1.30419e-11	1.79216e-11	2.40815e-11	1.7876e-11	3.81872e-11	1.73104e-11	2.19393e-11	1.90214e-11	1.86188e-11	2.07966e-11	1.83962e-11	2.18574e-11
12.02	1.57314e-11	1.63708e-11	2.03032e-11	1.70211e-11	1.72049e-11	2.15118e-11	1.93724e-11	1.30419e-11	1.79149e-11	2.40779e-11	1.78696e-11	3.81903e-11	1.73028e-11	2.19427e-11	1.90155e-11	1.86166e-11	2.07936e-11	1.84044e-11	2.18593e-11
12.04	1.57338e-11	1.63294e-11	2.03086e-11	1.70203e-11	1.72058e-11	2.15176e-11	1.93648e-11	1.30419e-11	1.79162e-11	2.4074e-11	1.78709e-11	3.81876e-11	1.73082e-11	2.19497e-11	1.90201e-11	1.86147e-11	2.07931e-11	1.84045e-11	2.18608e-11
12.06	1.57342e-11	1.63214e-11	2.03079e-11	1.70173e-11	1.72063e-11	2.15231e-11	1.9391e-11	1.30444e-11	1.7915e-11	2.40746e-11	1.78731e-11	3.81818e-11	1.72997e-11	2.19432e-11	1.90304e-11	1.86155e-11	2.07948e-11	1.84009e-11	2.18551e-11
12.08	1.57284e-11	1.63043e-11	2.03069e-11	1.70223e-11	1.71964e-11	2.15026e-11	1.93745e-11	1.30435e-11	1.79171e-11	2.40757e-11	1.78724e-11	3.81887e-11	1.72838e-11	2.19467e-11	1.90109e-11	1.86231e-11	2.07977e-11	1.84033e-11	2.18619e-11
12.1	1.57322e-11	1.62879e-11	2.03063e-11	1.70214e-11	1.71991e-11	2.15082e-11	1.93553e-11	1.30443e-11	1.79096e-11	2.40742e-11	1.78789e-11	3.81895e-11	1.72991e-11	2.19426e-11	1.9012e-11	1.86138e-11	2.07945e-11	1.84032e-11	2.18564e-11
12.12	1.57279e-11	1.62986e-11	2.03145e-11	1.70188e-11	1.72167e-11	2.15139e-11	1.93791e-11	1.30402e-11	1.79068e-11	2.408e-11	1.78704e-11	3.81841e-11	1.73027e-11	2.19501e-11	1.90146e-11	1.8621e-11	2.08021e-11	1.84069e-11	2.1852e-11
12.14	1.57377e-11	1.62872e-11	2.03099e-11	1.70196e-11	1.72247e-11	2.1511e-11	1.94062e-11	1.30408e-11	1.79104e-11	2.40757e-11	1.78747e-11	3.81843e-11	1.73e-11	2.19399e-11	1.90178e-11	1.86161e-11	2.08092e-11	1.84027e-11	2.18656e-11
12.16	1.57372e-11	1.62861e-11	2.03024e-11	1.70178e-11	1.72268e-11	2.15095e-11	1.93846e-11	1.30422e-11	1.79092e-11	2.40738e-11	1.78697e-11	3.81839e-11	1.72926e-11	2.19474e-11	1.9021e-11	1.86179e-11	2.08024e-11	1.84019e-11	2.18566e-11
12.18	1.57441e-11	1.62842e-11	2.03111e-11	1.702e-11	1.72161e-11	2.15156e-11	1.93911e-11	1.30465e-11	1.79079e-11	2.40757e-11	1.7876e-11	3.81863e-11	1.7297e-11	2.19452e-11	1.90161e-11	1.86179e-11	2.07973e-11	1.84074e-11	2.18461e-11
12.2	1.57296e-11	1.62815e-11	2.03149e-11	1.702e-11	1.72135e-11	2.15054e-11	1.93821e-11	1.30443e-11	1.79085e-11	2.40734e-11	1.78682e-11	3.81848e-11	1.72863e-11	2.19437e-11	1.90127e-11	1.86119e-11	2.07933e-11	1.84018e-11	2.18556e-11
12.22	1.57273e-11	1.62929e-11	2.03064e-11	1.70149e-11	1.72179e-11	2.15097e-11	1.93776e-11	1.30478e-11	1.79067e-11	2.40809e-11	1.78672e-11	3.81852e-11	1.72893e-11	2.19452e-11	1.90226e-11	1.86159e-11	2.0812e-11	1.8399e-11	2.18512e-11
12.24	1.57287e-11	1.62828e-11	2.03108e-11	1.70152e-11	1.72181e-11	2.1504e-11	1.93958e-11	1.30469e-11	1.79114e-11	2.40772e-11	1.78693e-11	3.81805e-11	1.72903e-11	2.19467e-11	1.9022e-11	1.86128e-11	2.07977e-11	1.84076e-11	2.18508e-11
12.26	1.57338e-11	1.62859e-11	2.03092e-11	1.70192e-11	1.72119e-11	2.15011e-11	1.93913e-11	1.30392e-11	1.79134e-11	2.40771e-11	1.78757e-11	3.81822e-11	1.73126e-11	2.19498e-11	1.90093e-11	1.8612e-11	2.0808e-11	1.84081e-11	2.18542e-11
12.28	1.57374e-11	1.62887e-11	2.0312e-11	1.70207e-11	1.72167e-11	2.15057e-11	1.94061e-11	1.30427e-11	1.79095e-11	2.40772e-11	1.78695e-11	3.81885e-11	1.72893e-11	2.19437e-11	1.90179e-11	1.86202e-11	2.07962e-11	1.84064e-11	2.18596e-11
12.3	1.57332e-11	1.62896e-11	2.03125e-11	1.70151e-11	1.72153e-11	2.15108e-11	1.94123e-11	1.30436e-11	1.79149e-11	2.4075e-11	1.78687e-11	3.81946e-11	1.73029e-11	2.19413e-11	1.90087e-11	1.86142e-11	2.08001e-11	1.84034e-11	2.18601e-11
12.32	1.57432e-11	1.62928e-11	2.03124e-11	1.70147e-11	1.72194e-11	2.15077e-11	1.93646e-11	1.30417e-11	1.79134e-11	2.40736e-11	1.78702e-11	3.81914e-11	1.72997e-11	2.19476e-11	1.90156e-11	1.86154e-11	2.07988e-11	1.84058e-11	2.18481e-11
12.34	1.57405e-11	1.63002e-11	2.03089e-11	1.70206e-11	1.72247e-11	2.15122e-11	1.93757e-11	1.30416e-11	1.79106e-11	2.40725e-11	1.7874e-11	3.81822e-11	1.73094e-11	2.19472e-11	1.90233e-11	1.86129e-11	2.07956e-11	1.84047e-11	2.18496e-11
12.36	1.57313e-11	1.62883e-11	2.03084e-11	1.70107e-11	1.72237e-11	2.1511e-11	1.93671e-11	1.30435e-11	1.79081e-11	2.40722e-11	1.78736e-11	3.82e-11	1.73001e-11	2.19481e-11	1.90218e-11	1.86144e-11	2.07981e-11	1.84018e-11	2.18581e-11
12.38	1.57404e-11	1.63003e-11	2.03162e-11	1.70174e-11	1.72141e-11	2.15076e-11	1.93959e-11	1.30438e-11	1.79171e-11	2.40744e-11	1.78729e-11	3.81854e-11	1.72906e-11	2.19457e-11	1.90168e-11	1.86191e-11	2.08025e-11	1.84042e-11	2.18531e-11
12.4	1.57411e-11	1.63067e-11	2.03111e-11	1.70154e-11	1.72239e-11	2.15075e-11	1.93985e-11	1.30466e-11	1.79109e-11	2.40796e-11	1.78729e-11	3.82004e-11	1.73065e-11	2.19501e-11	1.90086e-11	1.86163e-11	2.08036e-11	1.84045e-11	2.18567e-11
12.42	1.57394e-11	1.62993e-11	2.03116e-11	1.70126e-11	1.72219e-11	2.15219e-11	1.93997e-11	1.30493e-11	1.79095e-11	2.40814e-11	1.78702e-11	3.81883e-11	1.72857e-11	2.19424e-11	1.90208e-11	1.8611e-11	2.07982e-11	1.83986e-11	2.18579e-11
12.44	1.57467e-11	1.62978e-11	2.03122e-11	1.70153e-11	1.72192e-11	2.15026e-11	1.93833e-11	1.30475e-11	1.79107e-11	2.40726e-11	1.78701e-11	3.81893e-11	1.72903e-11	2.19514e-11	1.90225e-11	1.86173e-11	2.07992e-11	1.83979e-11	2.18568e-11
12.46	1.57466e-11	1.6297e-11	2.03101e-11	1.70159e-11	1.7217e-11	2.15079e-11	1.93859e-11	1.30407e-11	1.79115e-11	2.40732e-11	1.78737e-11	3.81894e-11	1.7288e-11	2.19464e-11	1.90204e-11	1.86176e-11	2.08071e-11	1.84059e-11	2.1855e-11
12.48	1.57415e-11	1.63016e-11	2.03065e-11	1.70166e-11	1.72252e-11	2.15072e-11	1.94162e-11	1.30405e-11	1.79108e-11	2.4074e-11	1.78757e-11	3.81894e-11	1.72854e-11	2.19454e-11	1.90164e-11	1.86195e-11	2.08127e-11	1.83971e-11	2.18548e-11
12.5	1.57377e-11	1.63074e-11	2.0315e-11	1.70141e-11	1.72232e-11	2.15092e-11	1.93881e-11	1.30454e-11	1.7909e-11	2.40824e-11	1.78744e-11	3.81926e-11	1.72805e-11	2.19477e-11	1.90108e-11	1.86136e-11	2.07984e-11	1.84028e-11	2.18626e-11
12.52	1.57397e-11	1.62973e-11	2.03072e-11	1.70164e-11	1.72247e-11	2.15115e-11	1.93877e-11	1.3045e-11	1.791e-11	2.40758e-11	1.7877e-11	3.81857e-11	1.72902e-11	2.19471e-11	1.90201e-11	1.86188e-11	2.08066e-11	1.84082e-11	2.18582e-11
12.54	1.57389e-11	1.62995e-11	2.0306e-11	1.70166e-11	1.72298e-11	2.15166e-11	1.93704e-11	1.30454e-11	1.79072e-11	2.40756e-11	1.78794e-11	3.81953e-11	1.73042e-11	2.19473e-11	1.90209e-11	1.86158e-11	2.07966e-11	1.84014e-11	2.18605e-11
12.56	1.574e-11	1.62874e-11	2.03094e-11	1.70152e-11	1.72278e-11	2.15039e-11	1.93571e-11	1.30435e-11	1.7914e-11	2.40769e-11	1.78706e-11	3.81909e-11	1.73012e-11	2.1942e-11	1.90047e-11	1.86157e-11	2.0803e-11	1.84038e-11	2.18545e-11
12.58	1.5736e-11	1.62953e-11	2.03123e-11	1.70136e-11	1.72222e-11	2.15055e-11	1.93893e-11	1.30396e-11	1.79121e-11	2.4079e-11	1.7871e-11	3.81895e-11	1.73052e-11	2.19371e-11	1.90147e-11	1.86165e-11	2.08e-11	1.84067e-11	2.18497e-11
12.6	1.57322e-11	1.62906e-11	2.03136e-11	1.70165e-11	1.72311e-11	2.15009e-11	1.93931e-11	1.30404e-11	1.79168e-11	2.4077e-11	1.78731e-11	3.81891e-11	1.73065e-11	2.19431e-11	1.90167e-11	1.86143e-11	2.07981e-11	1.84036e-11	2.18514e-11
12.62	1.57308e-11	1.62951e-11	2.03133e-11	1.70124e-11	1.72276e-11	2.15094e-11	1.93555e-11	1.30457e-11	1.79071e-11	2.40725e-11	1.78749e-11	3.81931e-11	1.72957e-11	2.19419e-11	1.90176e-11	1.86133e-11	2.07987e-11	1.83998e-11	2.18602e-11
12.64	1.57317e-11	1.62984e-11	2.03137e-11	1.70152e-11	1.72208e-11	2.15139e-11	1.93742e-11	1.30461e-11	1.79097e-11	2.40802e-11	1.78712e-11	3.81793e-11	1.72993e-11	2.19469e-11	1.90097e-11	1.86125e-11	2.08051e-11	1.84047e-11	2.1854e-11
12.66	1.57237e-11	1.62985e-11	2.03117e-11	1.70197e-11	1.72355e-11	2.15132e-11	1.93782e-11	1.3043e-11	1.79062e-11	2.40695e-11	1.78671e-11	3.81865e-11	1.72866e-11	2.19441e-11	1.9025e-11	1.86173e-11	2.08001e-11	1.83969e-11	2.18565e-11
12.68	1.5739e-11	1.62953e-11	2.03155e-11	1.70116e-11	1.72288e-11	2.15133e-11	1.9403e-11	1.30478e-11	1.79102e-11	2.40753e-11	1.78796e-11	3.81912e-11	1.73038e-11	2.19453e-11	1.90213e-11	1.86132e-11	2.0794e-11	1.83975e-11	2.18607e-11
12.7	1.57316e-11	1.62931e-11	2.03081e-11	1.70138e-11	1.72299e-11	2.15171e-11	1.93717e-11	1.3037e-11	1.79129e-11	2.40774e-11	1.78689e-11	3.81823e-11	1.73166e-11	2.19472e-11	1.90134e-11	1.86167e-11	2.07947e-11	1.84005e-11	2.18507e-11
12.72	1.57247e-11	1.62966e-11	2.03028e-11	1.70148e-11	1.72274e-11	2.15154e-11	1.93836e-11	1.30467e-11	1.79077e-11	2.4079e-11	1.78719e-11	3.81868e-11	1.7286e-11	2.19459e-11	1.90143e-11	1.86136e-11	2.08003e-11	1.84015e-11	2.18555e-11
12.74	1.57388e-11	1.62981e-11	2.03137e-11	1.7012e-11	1.72314e-11	2.15193e-11	1.9371e-11	1.30449e-11	1.79116e-11	2.40775e-11	1.78705e-11	3.81825e-11	1.73013e-11	2.19449e-11	1.90177e-11	1.86148e-11	2.08006e-11	1.84072e-11	2.18546e-11
12.76	1.57284e-11	1.62976e-11	2.03127e-11	1.70124e-11	1.72302e-11	2.15236e-11	1.93785e-11	1.30398e-11	1.7911e-11	2.40781e-11	1.78774e-11	3.81985e-11	1.73051e-11	2.19403e-11	1.90118e-11	1.86165e-11	2.08141e-11	1.84093e-11	2.18561e-11
12.78	1.57211e-11	1.63034e-11	2.03139e-11	1.70197e-11	1.72352e-11	2.1515e-11	1.9381e-11	1.30519e-11	1.79136e-11	2.40751e-11	1.78689e-11	3.81847e-11	1.73114e-11	2.19408e-11	1.90144e-11	1.86185e-11	2.0804e-11	1.8409e-11	2.18524e-11
12.8	1.57297e-11	1.63039e-11	2.03143e-11	1.70159e-11	1.72298e-11	2.15206e-11	1.94072e-11	1.30499e-11	1.79183e-11	2.40811e-11	1.78734e-11	3.81903e-11	1.73102e-11	2.19473e-11	1.90128e-11	1.8619e-11	2.07974e-11	1.84043e-11	2.18562e-11
12.82	1.57321e-11	1.631e-11	2.03154e-11	1.70175e-11	1.72357e-11	2.15161e-11	1.93659e-11	1.30373e-11	1.79175e-11	2.40756e-11	1.78668e-11	3.81955e-11	1.7297e-11	2.19409e-11	1.90163e-11	1.86153e-11	2.081e-11	1.84014e-11	2.18526e-11
12.84	1.57354e-11	1.62974e-11	2.03183e-11	1.70126e-11	1.72361e-11	2.15218e-11	1.9352e-11	1.30417e-11	1.79113e-11	2.40786e-11	1.78725e-11	3.81847e-11	1.73054e-11	2.19397e-11	1.90169e-11	1.86189e-11	2.08048e-11	1.84028e-11	2.18542e-11
12.86	1.57418e-11	1.63047e-11	2.0315e-11	1.70149e-11	1.72354e-11	2.1519e-11	1.9374e-11	1.30428e-11	1.79133e-11	2.40829e-11	1.78715e-11	3.81882e-11	1.73058e-11	2.19448e-11	1.90152e-11	1.86127e-11	2.08099e-11	1.84026e-11	2.18472e-11
12.88	1.57288e-11	1.6299e-11	2.03136e-11	1.70141e-11	1.72323e-11	2.15099e-11	1.93796e-11	1.30452e-11	1.79082e-11	2.40779e-11	1.78716e-11	3.81889e-11	1.72962e-11	2.19447e-11	1.90194e-11	1.86173e-11	2.08091e-11	1.83951e-11	2.18538e-11
12.9	1.57262e-11	1.63087e-11	2.03125e-11	1.70075e-11	1.72408e-11	2.15201e-11	1.93644e-11	1.3046e-11	1.79126e-11	2.4082e-11	1.78714e-11	3.8187e-11	1.72975e-11	2.195e-11	1.90219e-11	1.86147e-11	2.07957e-11	1.83977e-11	2.18627e-11
12.92	1.57223e-11	1.63017e-11	2.03094e-11	1.70173e-11	1.72394e-11	2.15166e-11	1.93579e-11	1.30457e-11	1.79112e-11	2.40765e-11	1.78789e-11	3.81882e-11	1.72965e-11	2.19457e-11	1.90082e-11	1.86176e-11	2.08025e-11	1.8409e-11	2.18517e-11
12.94	1.57316e-11	1.63085e-11	2.03136e-11	1.70106e-11	1.72397e-11	2.15156e-11	1.93811e-11	1.30443e-11	1.79117e-11	2.40794e-11	1.78753e-11	3.81876e-11	1.73183e-11	2.19506e-11	1.90159e-11	1.86144e-11	2.08079e-11	1.84022e-11	2.18562e-11
12.96	1.57383e-11	1.6309e-11	2.0318e-11	1.7014e-11	1.72399e-11	2.1528e-11	1.93588e-11	1.30478e-11	1.7916e-11	2.40731e-11	1.78723e-11	3.81776e-11	1.73157e-11	2.19456e-11	1.90163e-11	1.86176e-11	2.07999e-11	1.84068e-11	2.18539e-11
12.98	1.57377e-11	1.63062e-11	2.03124e-11	1.70186e-11	1.72414e-11	2.15236e-11	1.9344e-11	1.30456e-11	1.79044e-11	2.40852e-11	1.78704e-11	3.81863e-11	1.72975e-11	2.19497e-11	1.9015e-11	1.86096e-11	2.08061e-11	1.84008e-11	2.18523e-11
13	1.57389e-11	1.63032e-11	2.03116e-11	1.70116e-11	1.72379e-11	2.15255e-11	1.93503e-11	1.30426e-11	1.79109e-11	2.40739e-11	1.78674e-11	3.8185e-11	1.73123e-11	2.19426e-11	1.9013e-11	1.86164e-11	2.08125e-11	1.83964e-11	2.18552e-11
13.02	1.57347e-11	1.63055e-11	2.03197e-11	1.70095e-11	1.72438e-11	2.15194e-11	1.93651e-11	1.30468e-11	1.79045e-11	2.40791e-11	1.78751e-11	3.81869e-11	1.73087e-11	2.19441e-11	1.90154e-11	1.8615e-11	2.07939e-11	1.84023e-11	2.18507e-11
13.04	1.57392e-11	1.63101e-11		1.7012e-11	1.72365e-11	2.15162e-11	1.93374e-11	1.30448e-11	1.79091e-11	2.40854e-11	1.7871e-11	3.81946e-11	1.72956e-11	2.19415e-11	1.90106e-11	1.86119e-11	2.08017e-11	1.84001e-11	2.18552e-11
13.06	1.57409e-11	1.63224e-11		1.70146e-11	1.72476e-11	2.15143e-11	1.9378e-11	1.30438e-11	1.79025e-11	2.40763e-11	1.78771e-11	3.81844e-11	1.72934e-11	2.1944e-11	1.90127e-11	1.86198e-11	2.08032e-11	1.84012e-11	2.18609e-11
13.08	1.57322e-11	1.63072e-11		1.70148e-11	1.72441e-11	2.15236e-11	1.93756e-11	1.30459e-11	1.79112e-11	2.40765e-11	1.78682e-11	3.81878e-11	1.73e-11	2.19486e-11	1.90106e-11	1.86178e-11	2.08091e-11	1.84007e-11	2.18541e-11
13.1	1.57367e-11	1.63115e-11		1.7013e-11	1.72511e-11	2.15224e-11	1.93578e-11	1.30422e-11	1.79083e-11	2.40776e-11	1.78706e-11	3.81998e-11	1.72957e-11	2.19478e-11	1.90184e-11	1.86171e-11	2.08007e-11	1.84089e-11	2.18568e-11
13.12	1.57285e-11	1.63027e-11		1.70105e-11	1.72503e-11	2.15204e-11	1.93598e-11	1.30479e-11	1.7914e-11	2.40826e-11	1.78701e-11	3.81856e-11	1.72812e-11	2.19496e-11	1.9013e-11	1.86166e-11	2.08048e-11	1.83955e-11	2.18592e-11
13.14	1.5732e-11	1.63071e-11		1.70152e-11	1.72483e-11	2.15185e-11	1.93632e-11	1.30499e-11	1.79089e-11	2.40767e-11	1.78688e-11	3.8191e-11	1.72895e-11	2.19397e-11	1.90158e-11	1.86148e-11	2.08035e-11	1.84053e-11	2.18533e-11
13.16	1.57413e-11	1.63029e-11		1.70156e-11	1.72488e-11	2.15208e-11	1.93252e-11	1.30478e-11	1.79141e-11	2.40766e-11	1.78676e-11	3.81908e-11	1.73069e-11	2.19477e-11	1.90237e-11	1.86169e-11	2.08009e-11	1.84025e-11	2.18557e-11
13.18	1.57369e-11	1.63215e-11		1.7017e-11	1.72459e-11	2.15143e-11	1.93586e-11	1.30408e-11	1.79108e-11	2.4077e-11	1.78752e-11	3.81842e-11	1.73103e-11	2.19429e-11	1.90166e-11	1.86169e-11	2.08071e-11	1.84056e-11	2.18512e-11
13.2	1.57288e-11	1.63078e-11		1.70119e-11	1.72487e-11	2.15235e-11	1.93702e-11	1.30456e-11	1.79055e-11	2.4078e-11	1.78685e-11	3.81788e-11	1.73037e-11	2.19493e-11	1.90248e-11	1.86148e-11	2.08058e-11	1.84057e-11	2.18489e-11
13.22	1.5735e-11	1.63143e-11		1.7014e-11	1.72536e-11	2.15176e-11	1.9365e-11	1.3039e-11	1.79134e-11	2.4076e-11	1.78704e-11	3.8186e-11	1.72961e-11	2.19457e-11	1.90148e-11	1.86148e-11	2.08066e-11	1.84007e-11	2.18571e-11
13.24	1.5738e-11	1.63108e-11		1.70111e-11	1.72497e-11	2.15308e-11	1.9353e-11	1.30428e-11	1.79039e-11	2.4079e-11	1.78685e-11	3.81829e-11	1.73084e-11	2.19472e-11	1.90153e-11	1.86246e-11	2.08137e-11	1.84109e-11	2.18508e-11
13.26	1.57267e-11	1.6323e-11		1.70108e-11	1.72551e-11	2.1521e-11	1.9348e-11	1.30448e-11	1.79124e-11	2.40734e-11	1.78699e-11	3.81775e-11	1.72982e-11	2.19406e-11	1.90167e-11	1.8619e-11	2.08065e-11	1.84031e-11	2.18589e-11
13.28	1.57393e-11	1.63202e-11		1.70152e-11	1.72487e-11	2.15206e-11	1.93679e-11	1.30431e-11	1.79055e-11	2.4087e-11	1.78702e-11	3.81942e-11	1.7283e-11	2.19433e-11	1.90152e-11	1.86189e-11	2.08022e-11	1.84042e-11	2.18538e-11
13.3	1.57353e-11	1.6318e-11		1.70195e-11	1.72532e-11	2.15219e-11	1.93868e-11	1.30422e-11	1.79196e-11	2.40782e-11	1.78734e-11	3.81874e-11	1.72695e-11	2.19439e-11	1.90242e-11	1.86151e-11	2.08116e-11	1.84048e-11	2.18505e-11
13.32	1.57389e-11	1.6316e-11		1.70111e-11	1.72537e-11	2.15121e-11	1.93816e-11	1.30447e-11	1.7912e-11	2.40774e-11	1.78758e-11	3.81854e-11	1.72922e-11	2.19442e-11	1.90124e-11	1.86152e-11	2.08113e-11	1.84036e-11	2.18575e-11
13.34	1.5735e-11	1.63214e-11		1.70148e-11	1.72517e-11	2.15177e-11	1.93646e-11	1.30441e-11	1.79074e-11	2.40776e-11	1.78703e-11	3.81954e-11	1.72959e-11	2.19397e-11	1.90229e-11	1.86161e-11	2.08053e-11	1.84036e-11	2.18631e-11
13.36	1.5719e-11	1.63167e-11		1.70137e-11	1.72539e-11	2.15206e-11	1.93601e-11	1.30441e-11	1.79093e-11	2.40724e-11	1.7872e-11	3.81939e-11	1.72925e-11	2.19465e-11	1.90209e-11	1.86165e-11	2.08063e-11	1.84054e-11	2.18565e-11
13.38	1.57279e-11	1.63122e-11		1.70191e-11	1.72569e-11	2.15217e-11	1.93822e-11	1.30428e-11	1.79045e-11	2.40785e-11	1.78711e-11	3.81929e-11	1.72934e-11	2.19447e-11	1.90108e-11	1.86184e-11	2.0812e-11	1.84049e-11	2.18551e-11
13.4	1.57331e-11	1.63161e-11		1.70198e-11	1.72537e-11	2.15192e-11	1.93696e-11	1.30478e-11	1.79122e-11	2.40812e-11	1.78756e-11	3.81916e-11	1.73006e-11	2.19449e-11	1.90187e-11	1.86208e-11	2.08018e-11	1.84062e-11	2.18618e-11
13.42	1.57294e-11	1.63205e-11		1.70114e-11	1.72562e-11	2.15249e-11	1.93587e-11	1.30435e-11	1.79051e-11	2.4083e-11	1.78736e-11	3.81926e-11	1.72981e-11	2.19479e-11	1.90147e-11	1.86182e-11	2.08061e-11	1.84058e-11	2.18492e-11
13.44	1.57412e-11	1.63078e-11		1.70085e-11	1.72587e-11	2.1517e-11	1.93586e-11	1.30492e-11	1.79133e-11	2.40811e-11	1.78697e-11	3.81874e-11	1.72915e-11	2.19465e-11	1.90178e-11	1.86174e-11	2.08063e-11	1.83981e-11	2.18565e-11
13.46	1.57342e-11	1.63166e-11		1.70117e-11	1.72543e-11	2.15303e-11	1.93548e-11	1.30475e-11	1.79126e-11	2.40829e-11	1.78699e-11	3.81891e-11	1.72948e-11	2.19427e-11	1.90183e-11	1.86157e-11	2.08095e-11	1.84051e-11	2.18533e-11
13.48	1.57384e-11	1.63069e-11		1.70131e-11	1.72565e-11	2.15228e-11	1.93329e-11	1.30479e-11	1.79167e-11	2.40851e-11	1.78714e-11	3.81877e-11	1.72994e-11	2.19492e-11	1.90168e-11	1.86181e-11	2.08121e-11	1.8401e-11	2.18566e-11
13.5	1.57352e-11	1.63172e-11		1.70118e-11	1.72578e-11	2.15245e-11	1.93155e-11	1.3043e-11	1.79134e-11	2.40776e-11	1.78672e-11	3.81858e-11	1.72835e-11	2.19449e-11	1.9016e-11	1.86134e-11	2.08156e-11	1.84008e-11	2.18588e-11
13.52	1.57345e-11	1.63148e-11		1.70091e-11	1.72591e-11	2.15202e-11	1.93565e-11	1.30454e-11	1.79039e-11	2.40851e-11	1.7877e-11	3.81868e-11	1.72889e-11	2.1943e-11	1.90064e-11	1.86151e-11	2.08143e-11	1.8404e-11	2.18628e-11
13.54	1.57375e-11	1.63195e-11		1.70126e-11	1.72634e-11	2.15225e-11	1.93575e-11	1.30412e-11	1.79136e-11	2.40791e-11	1.78788e-11	3.81862e-11	1.72939e-11	2.19455e-11	1.90139e-11	1.8612e-11	2.08055e-11	1.84004e-11	2.18599e-11
13.56	1.57379e-11	1.63177e-11		1.70098e-11	1.72652e-11	2.15258e-11	1.93589e-11	1.30457e-11	1.79113e-11	2.4083e-11	1.78726e-11	3.81882e-11	1.73054e-11	2.1947e-11	1.90163e-11	1.8615e-11	2.08088e-11	1.83969e-11	2.18571e-11
13.58	1.57333e-11	1.63237e-11		1.70117e-11	1.72629e-11	2.15167e-11	1.93443e-11	1.30424e-11	1.79127e-11	2.40813e-11	1.78698e-11	3.81906e-11	1.73062e-11	2.19409e-11	1.9016e-11	1.8619e-11	2.08094e-11	1.83979e-11	2.18555e-11
13.6	1.57334e-11	1.63182e-11		1.70092e-11	1.72672e-11	2.15288e-11	1.93367e-11	1.30511e-11	1.79037e-11	2.40737e-11	1.78729e-11	3.8194e-11	1.72888e-11	2.19379e-11	1.90159e-11	1.86189e-11	2.08093e-11	1.83982e-11	2.18539e-11
13.62	1.57372e-11	1.63186e-11		1.70115e-11	1.72672e-11	2.15289e-11	1.93363e-11	1.30483e-11	1.79097e-11	2.40889e-11	1.78808e-11	3.81898e-11	1.72832e-11	2.19443e-11	1.90128e-11	1.86154e-11	2.08172e-11	1.84065e-11	2.18503e-11
13.64	1.57395e-11	1.63178e-11		1.70124e-11	1.72688e-11	2.15233e-11	1.93484e-11	1.30488e-11	1.79089e-11	2.40824e-11	1.78783e-11	3.81929e-11	1.7283e-11	2.19469e-11	1.90163e-11	1.8616e-11	2.0809e-11	1.84029e-11	2.18561e-11
13.66	1.57399e-11	1.63251e-11		1.70136e-11	1.72586e-11	2.15176e-11	1.93771e-11	1.30459e-11	1.79098e-11	2.40805e-11	1.78747e-11	3.81908e-11	1.72785e-11	2.19414e-11	1.90185e-11	1.86166e-11	2.0808e-11	1.83997e-11	2.18659e-11
13.68	1.57348e-11	1.63241e-11		1.70154e-11	1.72605e-11	2.15137e-11	1.93569e-11	1.30476e-11	1.79174e-11	2.40762e-11	1.78741e-11	3.81931e-11	1.72762e-11	2.19455e-11	1.9017e-11	1.86141e-11	2.08112e-11	1.84005e-11	2.18555e-11
13.7	1.57388e-11	1.63204e-11		1.70188e-11	1.72649e-11	2.15195e-11	1.93352e-11	1.30511e-11	1.7916e-11	2.40813e-11	1.78688e-11	3.8185e-11	1.72854e-11	2.1939e-11	1.90232e-11	1.86161e-11	2.08086e-11	1.83975e-11	2.18356e-11
13.72	1.57414e-11	1.63151e-11		1.70129e-11	1.72661e-11	2.15153e-11	1.93477e-11	1.3047e-11	1.79115e-11	2.40834e-11	1.78736e-11	3.81851e-11	1.728e-11	2.19508e-11	1.90253e-11	1.86166e-11	2.07985e-11	1.84016e-11	2.18461e-11
13.74	1.57396e-11	1.63175e-11		1.70161e-11	1.72673e-11	2.15166e-11	1.9378e-11	1.30474e-11	1.79081e-11	2.40811e-11	1.78749e-11	3.81907e-11	1.72706e-11	2.19508e-11	1.90239e-11	1.86156e-11	2.08078e-11	1.84043e-11	2.1837e-11
13.76	1.57276e-11	1.63229e-11		1.70044e-11	1.72641e-11	2.1523e-11	1.93501e-11	1.30508e-11	1.79038e-11	2.40805e-11	1.78707e-11	3.81815e-11	1.72679e-11	2.19453e-11	1.90196e-11	1.86179e-11	2.08065e-11	1.84019e-11	2.18441e-11
13.78	1.57359e-11	1.63244e-11		1.70126e-11	1.72672e-11	2.15256e-11	1.93491e-11	1.30506e-11	1.79119e-11	2.4084e-11	1.78725e-11	3.81933e-11	1.72866e-11	2.19408e-11	1.90265e-11	1.86132e-11	2.08196e-11	1.84033e-11	2.18442e-11
13.8	1.5734e-11	1.63254e-11		1.70075e-11	1.72719e-11	2.15272e-11	1.93436e-11	1.30458e-11	1.79081e-11	2.40806e-11	1.78672e-11	3.81943e-11	1.72634e-11	2.19449e-11	1.90166e-11	1.86135e-11	2.08103e-11	1.84065e-11	2.18434e-11
13.82	1.57304e-11	1.63273e-11		1.70149e-11	1.7273e-11	2.15174e-11	1.93447e-11	1.30495e-11	1.79076e-11	2.40787e-11	1.7872e-11	3.81906e-11	1.72822e-11	2.19526e-11	1.90218e-11	1.86155e-11	2.08109e-11	1.84015e-11	2.18581e-11
13.84	1.57337e-11	1.63165e-11		1.70087e-11	1.72721e-11	2.15193e-11	1.93353e-11	1.30466e-11	1.79133e-11	2.40807e-11	1.78732e-11	3.81867e-11	1.72787e-11	2.19458e-11	1.90244e-11	1.86169e-11	2.08145e-11	1.84018e-11	2.18556e-11
13.86	1.57282e-11	1.63191e-11		1.70132e-11	1.72662e-11	2.15162e-11	1.93566e-11	1.30489e-11	1.79105e-11	2.40795e-11	1.78728e-11	3.81864e-11	1.72867e-11	2.19456e-11	1.90181e-11	1.86115e-11	2.08095e-11	1.84046e-11	2.18472e-11
13.88	1.57314e-11	1.63231e-11		1.70093e-11	1.72716e-11	2.15258e-11	1.9368e-11	1.30487e-11	1.7905e-11	2.40781e-11	1.7876e-11	3.81884e-11	1.72818e-11	2.1949e-11	1.90078e-11	1.86171e-11	2.0811e-11	1.84006e-11	2.18496e-11
13.9	1.57294e-11	1.63193e-11		1.70095e-11	1.72691e-11	2.15245e-11	1.93448e-11	1.30439e-11	1.79025e-11	2.4073e-11	1.78732e-11	3.81806e-11	1.72846e-11	2.19445e-11	1.90178e-11	1.86161e-11	2.08097e-11	1.83998e-11	2.18537e-11
13.92	1.57322e-11	1.63232e-11		1.7007e-11	1.72702e-11	2.15273e-11	1.93401e-11	1.30426e-11	1.79098e-11	2.40797e-11	1.78751e-11	3.819e-11	1.72794e-11	2.19456e-11	1.90171e-11	1.8616e-11	2.08118e-11	1.83961e-11	2.18577e-11
13.94	1.57218e-11	1.63242e-11		1.70058e-11	1.72754e-11	2.15179e-11	1.93397e-11	1.30493e-11	1.79007e-11	2.40733e-11	1.78709e-11	3.81893e-11	1.7289e-11	2.19438e-11	1.9017e-11	1.86159e-11	2.08157e-11	1.84048e-11	2.18477e-11
13.96	1.57238e-11	1.63219e-11		1.70089e-11	1.72742e-11	2.15142e-11	1.93249e-11	1.30441e-11	1.79121e-11	2.40829e-11	1.78674e-11	3.81896e-11	1.72845e-11	2.19479e-11	1.90252e-11	1.86144e-11	2.08119e-11	1.84003e-11	2.18532e-11
13.98	1.57164e-11	1.63225e-11		1.70105e-11	1.72735e-11	2.15195e-11	1.93481e-11	1.30402e-11	1.7904e-11	2.40852e-11	1.78779e-11	3.81841e-11	1.72809e-11	2.19458e-11	1.90108e-11	1.86148e-11	2.08116e-11	1.8403e-11	2.18518e-11
14	1.57204e-11	1.63192e-11		1.70124e-11	1.72665e-11	2.15201e-11	1.93211e-11	1.30393e-11	1.79022e-11	2.40825e-11	1.78731e-11	3.81925e-11	1.72733e-11	2.19427e-11	1.90138e-11	1.86148e-11	2.08082e-11	1.83978e-11	2.18445e-11
14.02	1.57228e-11	1.63172e-11		1.70104e-11	1.72739e-11	2.15243e-11	1.9322e-11	1.30406e-11	1.79094e-11	2.40868e-11	1.78755e-11	3.81857e-11	1.72762e-11	2.19469e-11	1.90212e-11	1.86177e-11	2.0808e-11	1.84006e-11	2.18516e-11
14.04	1.57189e-11	1.63278e-11		1.70169e-11	1.72735e-11	2.15197e-11	1.93721e-11	1.30505e-11	1.79087e-11	2.40748e-11	1.78756e-11	3.81922e-11	1.72803e-11	2.19488e-11	1.90178e-11	1.86171e-11	2.0815e-11	1.84062e-11	2.18467e-11
14.06	1.57272e-11	1.63284e-11		1.70104e-11	1.72729e-11	2.15257e-11	1.93387e-11	1.30486e-11	1.79072e-11	2.40776e-11	1.78768e-11	3.81839e-11	1.72776e-11	2.19454e-11	1.901e-11	1.86158e-11	2.08066e-11	1.84059e-11	2.18565e-11
14.08	1.57281e-11	1.63198e-11		1.70094e-11	1.72748e-11	2.15289e-11	1.93107e-11	1.30471e-11	1.7905e-11	2.40816e-11	1.78788e-11	3.81915e-11	1.72883e-11	2.19419e-11	1.90153e-11	1.86167e-11	2.08173e-11	1.84066e-11	2.18544e-11
14.1	1.57288e-11	1.6324e-11		1.70086e-11	1.72771e-11	2.15196e-11	1.92975e-11	1.30392e-11	1.79085e-11	2.40811e-11	1.78721e-11	3.81951e-11	1.7271e-11	2.19419e-11	1.90122e-11	1.86176e-11	2.08099e-11	1.84022e-11	2.18453e-11
14.12	1.57237e-11	1.63338e-11		1.70115e-11	1.72726e-11	2.15279e-11	1.93278e-11	1.30448e-11	1.79072e-11	2.40818e-11	1.7877e-11	3.81886e-11	1.72623e-11	2.19456e-11	1.90197e-11	1.86215e-11	2.08182e-11	1.8398e-11	2.18497e-11
14.14	1.57426e-11	1.63313e-11		1.70129e-11	1.72813e-11	2.15299e-11	1.9323e-11	1.30521e-11	1.79092e-11	2.40836e-11	1.78708e-11	3.8188e-11	1.72795e-11	2.19399e-11	1.90125e-11	1.86159e-11	2.08074e-11	1.83911e-11	2.1857e-11
14.16	1.57417e-11	1.63269e-11		1.70141e-11	1.72737e-11	2.15302e-11	1.93033e-11	1.30467e-11	1.79074e-11	2.40824e-11	1.78733e-11	3.81884e-11	1.72642e-11	2.19472e-11	1.90069e-11	1.86134e-11	2.08151e-11	1.84019e-11	2.18609e-11
14.18	1.57278e-11	1.63155e-11		1.70121e-11	1.72765e-11	2.1524e-11	1.93461e-11	1.30464e-11	1.79075e-11	2.40774e-11	1.78724e-11	3.81946e-11	1.72964e-11	2.19479e-11	1.90118e-11	1.8619e-11	2.08168e-11	1.84048e-11	2.18587e-11
14.2	1.57268e-11	1.63364e-11		1.70123e-11	1.72749e-11	2.15259e-11	1.93445e-11	1.30519e-11	1.7907e-11	2.40748e-11	1.78713e-11	3.81917e-11	1.72882e-11	2.1948e-11	1.90164e-11	1.86186e-11	2.08117e-11	1.83994e-11	2.18573e-11
14.22	1.57363e-11	1.63239e-11		1.70086e-11	1.72776e-11	2.15248e-11	1.93136e-11	1.3047e-11	1.79047e-11	2.40802e-11	1.78764e-11	3.81893e-11	1.72712e-11	2.19458e-11	1.901e-11	1.86159e-11	2.082e-11	1.8402e-11	2.18538e-11
14.24	1.57119e-11	1.63313e-11		1.7011e-11	1.72746e-11	2.15306e-11	1.93333e-11	1.30516e-11	1.79119e-11	2.40812e-11	1.78758e-11	3.81884e-11	1.72644e-11	2.19435e-11	1.90103e-11	1.86174e-11	2.08171e-11	1.84072e-11	2.18555e-11
14.26	1.57186e-11	1.64502e-11		1.70086e-11	1.72702e-11	2.15184e-11	1.93488e-11	1.30486e-11	1.79063e-11	2.4082e-11	1.78769e-11	3.81932e-11	1.72645e-11	2.19459e-11	1.90089e-11	1.86206e-11	2.08102e-11	1.8404e-11	2.18524e-11
14.28	1.57188e-11	1.63543e-11		1.70093e-11	1.7285e-11	2.15167e-11	1.93506e-11	1.30497e-11	1.7906e-11	2.40768e-11	1.78781e-11	3.81931e-11	1.72619e-11	2.19455e-11	1.90121e-11	1.86185e-11	2.08214e-11	1.84023e-11	2.18542e-11
14.3	1.57255e-11	1.63982e-11		1.70129e-11	1.72795e-11	2.15243e-11	1.93444e-11	1.30474e-11	1.79095e-11	2.4075e-11	1.78763e-11	3.8181e-11	1.72672e-11	2.19437e-11	1.90171e-11	1.86147e-11	2.08125e-11	1.84052e-11	2.18517e-11
14.32	1.57221e-11	1.64075e-11		1.70096e-11	1.72852e-11	2.15167e-11	1.93288e-11	1.30441e-11	1.79035e-11	2.40751e-11	1.78746e-11	3.8185e-11	1.72797e-11	2.1953e-11	1.9004e-11	1.86181e-11	2.08121e-11	1.84034e-11	2.18514e-11
14.34	1.57273e-11	1.64178e-11		1.7014e-11	1.72829e-11	2.15223e-11	1.93335e-11	1.30453e-11	1.79098e-11	2.40687e-11	1.78745e-11	3.81927e-11	1.72626e-11	2.1943e-11	1.90058e-11	1.86198e-11	2.08201e-11	1.84078e-11	2.18482e-11
14.36	1.57407e-11	1.64173e-11		1.70107e-11	1.72838e-11	2.15286e-11	1.93268e-11	1.30528e-11	1.79047e-11	2.40793e-11	1.78714e-11	3.81813e-11	1.72771e-11	2.19463e-11	1.90073e-11	1.86197e-11	2.08108e-11	1.84057e-11	2.18518e-11
14.38	1.57273e-11	1.64148e-11		1.70147e-11	1.72849e-11	2.15222e-11	1.9334e-11	1.30489e-11	1.79014e-11	2.40812e-11	1.78816e-11	3.81892e-11	1.72553e-11	2.19391e-11	1.90112e-11	1.8613e-11	2.0812e-11	1.84004e-11	2.1855e-11
14.4	1.57255e-11	1.64156e-11		1.70077e-11	1.72807e-11	2.15315e-11	1.93233e-11	1.3045e-11	1.79086e-11	2.40783e-11	1.78707e-11	3.81872e-11	1.72681e-11	2.195e-11	1.90126e-11	1.86187e-11	2.08102e-11	1.84041e-11	2.18605e-11
14.42	1.57303e-11	1.64218e-11		1.7011e-11	1.72909e-11	2.15277e-11	1.93528e-11	1.30446e-11	1.79126e-11	2.40828e-11	1.78725e-11	3.81863e-11	1.72594e-11	2.19414e-11	1.90048e-11	1.86145e-11	2.08176e-11	1.8404e-11	2.18573e-11
14.44	1.57412e-11	1.64175e-11		1.70081e-11	1.72882e-11	2.15249e-11	1.93219e-11	1.30496e-11	1.7908e-11	2.40816e-11	1.78726e-11	3.81925e-11	1.72695e-11	2.19467e-11	1.90048e-11	1.86161e-11	2.08099e-11	1.84027e-11	2.18547e-11
14.46	1.5733e-11	1.64124e-11		1.70082e-11	1.72826e-11	2.15137e-11	1.93353e-11	1.30472e-11	1.79079e-11	2.40797e-11	1.78819e-11	3.81891e-11	1.72779e-11	2.19524e-11	1.90086e-11	1.86134e-11	2.0817e-11	1.84011e-11	2.18542e-11
14.48	1.57369e-11	1.64243e-11		1.70097e-11	1.7286e-11	2.15188e-11	1.93167e-11	1.30483e-11	1.79136e-11	2.40791e-11	1.78728e-11	3.81906e-11	1.72622e-11	2.19433e-11	1.90064e-11	1.86167e-11	2.08108e-11	1.84047e-11	2.18572e-11
14.5	1.57327e-11	1.64202e-11		1.70098e-11	1.72871e-11	2.1524e-11	1.93399e-11	1.30446e-11	1.79171e-11	2.40764e-11	1.78716e-11	3.81771e-11	1.72797e-11	2.19404e-11	1.90076e-11	1.86168e-11	2.08119e-11	1.84007e-11	2.186e-11
14.52	1.57384e-11	1.64248e-11		1.70128e-11	1.72894e-11	2.15226e-11	1.93449e-11	1.30529e-11	1.79133e-11	2.40775e-11	1.78731e-11	3.81945e-11	1.7286e-11	2.19424e-11	1.90054e-11	1.86155e-11	2.08128e-11	1.84005e-11	2.18645e-11
14.54	1.57415e-11	1.64228e-11		1.70082e-11	1.72919e-11	2.15222e-11	1.93393e-11	1.30504e-11	1.79052e-11	2.40844e-11	1.787e-11	3.81949e-11	1.72853e-11	2.19441e-11	1.90026e-11	1.86161e-11	2.08107e-11	1.83974e-11	2.18555e-11
14.56	1.57411e-11	1.64215e-11		1.70092e-11	1.72878e-11	2.15166e-11	1.93416e-11	1.30514e-11	1.79138e-11	2.40774e-11	1.78707e-11	3.81889e-11	1.72704e-11	2.19523e-11	1.90124e-11	1.86145e-11	2.08161e-11	1.84001e-11	2.18547e-11
14.58	1.57477e-11	1.64156e-11		1.70094e-11	1.72907e-11	2.15205e-11	1.93716e-11	1.30506e-11	1.79057e-11	2.40809e-11	1.78743e-11	3.8189e-11	1.72759e-11	2.19518e-11	1.90062e-11	1.86174e-11	2.08045e-11	1.84071e-11	2.18575e-11
14.6	1.57329e-11	1.64153e-11		1.70051e-11	1.72915e-11	2.15162e-11	1.9342e-11	1.30464e-11	1.7901e-11	2.40883e-11	1.78838e-11	3.81962e-11	1.72787e-11	2.1946e-11	1.90189e-11	1.86159e-11	2.08183e-11	1.84018e-11	2.1862e-11
14.62	1.57471e-11	1.64127e-11		1.70109e-11	1.72913e-11	2.15243e-11	1.93346e-11	1.30433e-11	1.79049e-11	2.40749e-11	1.78736e-11	3.8195e-11	1.72712e-11	2.19428e-11	1.90049e-11	1.86203e-11	2.0816e-11	1.83993e-11	2.18588e-11
14.64	1.57426e-11	1.64239e-11		1.70093e-11	1.72882e-11	2.15386e-11	1.9357e-11	1.3048e-11	1.78973e-11	2.40797e-11	1.78745e-11	3.81965e-11	1.72875e-11	2.19482e-11	1.90077e-11	1.86195e-11	2.082e-11	1.84066e-11	2.18541e-11
14.66	1.57476e-11	1.64156e-11		1.70147e-11	1.72911e-11	2.15266e-11	1.93273e-11	1.30528e-11	1.79002e-11	2.40816e-11	1.78813e-11	3.81964e-11	1.72887e-11	2.19394e-11	1.90072e-11	1.86157e-11	2.0808e-11	1.84053e-11	2.18582e-11
14.68	1.57414e-11	1.64147e-11		1.70126e-11	1.72979e-11	2.15284e-11	1.93454e-11	1.30525e-11	1.78922e-11	2.40808e-11	1.78833e-11	3.81957e-11	1.72829e-11	2.19407e-11	1.90025e-11	1.86167e-11	2.08091e-11	1.83988e-11	2.18549e-11
14.7	1.57362e-11	1.64197e-11		1.70086e-11	1.72898e-11	2.15238e-11	1.93499e-11	1.30469e-11	1.78924e-11	2.40805e-11	1.78758e-11	3.81917e-11	1.72726e-11	2.19453e-11	1.90168e-11	1.86209e-11	2.08126e-11	1.84065e-11	2.18618e-11
14.72	1.57324e-11	1.64187e-11		1.70123e-11	1.72868e-11	2.15219e-11	1.93281e-11	1.30466e-11	1.78905e-11	2.40867e-11	1.78779e-11	3.81827e-11	1.729e-11	2.19509e-11	1.90081e-11	1.8613e-11	2.0815e-11	1.84068e-11	2.18528e-11
14.74	1.57332e-11	1.64197e-11		1.70076e-11	1.72873e-11	2.1518e-11	1.93677e-11	1.30483e-11	1.78839e-11	2.40842e-11	1.78722e-11	3.81951e-11	1.72832e-11	2.19506e-11	1.9016e-11	1.86187e-11	2.08161e-11	1.84071e-11	2.18593e-11
14.76	1.57401e-11	1.64169e-11		1.70058e-11	1.72942e-11	2.1535e-11	1.93509e-11	1.30508e-11	1.78843e-11	2.40839e-11	1.78741e-11	3.81854e-11	1.72751e-11	2.19424e-11	1.89996e-11	1.86154e-11	2.08151e-11	1.84116e-11	2.1863e-11
14.78	1.57309e-11	1.64191e-11		1.70112e-11	1.72929e-11	2.15388e-11	1.93168e-11	1.30451e-11	1.78795e-11	2.40852e-11	1.78694e-11	3.81914e-11	1.72684e-11	2.19474e-11	1.89974e-11	1.86199e-11	2.08114e-11	1.84092e-11	2.1864e-11
14.8	1.57249e-11	1.64223e-11		1.70107e-11	1.72936e-11	2.15281e-11	1.93236e-11	1.30491e-11	1.78793e-11	2.40805e-11	1.78803e-11	3.819e-11	1.72782e-11	2.195e-11	1.90083e-11	1.86171e-11	2.08127e-11	1.84045e-11	2.18643e-11
14.82	1.57332e-11	1.64154e-11		1.70118e-11	1.72969e-11	2.15227e-11	1.93543e-11	1.30451e-11	1.78772e-11	2.4081e-11	1.78803e-11	3.81923e-11	1.72831e-11	2.19463e-11	1.90059e-11	1.86175e-11	2.08121e-11	1.84093e-11	2.1861e-11
14.84	1.5739e-11	1.64231e-11		1.70064e-11	1.72894e-11	2.15327e-11	1.93303e-11	1.30458e-11	1.78739e-11	2.40812e-11	1.78792e-11	3.81919e-11	1.72767e-11	2.19403e-11	1.90058e-11	1.86186e-11	2.08112e-11	1.8403e-11	2.18637e-11
14.86	1.57357e-11	1.64169e-11		1.70062e-11	1.72895e-11	2.15278e-11	1.93421e-11	1.30465e-11	1.78677e-11	2.40814e-11	1.78731e-11	3.81922e-11	1.72705e-11	2.19461e-11	1.90091e-11	1.86202e-11	2.08087e-11	1.84005e-11	2.18616e-11
14.88	1.56539e-11	1.64147e-11		1.70081e-11	1.72902e-11	2.15206e-11	1.93313e-11	1.30495e-11	1.78669e-11	2.40797e-11	1.78692e-11	3.81886e-11	1.72816e-11	2.19453e-11	1.90034e-11	1.86178e-11	2.08178e-11	1.84034e-11	2.18589e-11
14.9	1.55622e-11	1.64125e-11		1.70059e-11	1.72895e-11	2.15193e-11	1.93558e-11	1.30464e-11	1.78617e-11	2.40833e-11	1.78771e-11	3.81872e-11	1.73034e-11	2.19483e-11	1.90089e-11	1.86136e-11	2.08096e-11	1.84082e-11	2.1858e-11
14.92	1.55441e-11	1.6423e-11		1.70053e-11	1.72893e-11	2.15171e-11	1.93154e-11	1.30521e-11	1.78638e-11	2.40783e-11	1.78682e-11	3.81852e-11	1.72797e-11	2.1945e-11	1.9007e-11	1.86176e-11	2.08126e-11	1.84033e-11	2.18578e-11
14.94	1.55462e-11	1.6415e-11		1.70153e-11	1.72911e-11	2.1522e-11	1.93013e-11	1.3049e-11	1.78632e-11	2.40763e-11	1.788e-11	3.81903e-11	1.72777e-11	2.1942e-11	1.90118e-11	1.86143e-11	2.08127e-11	1.84028e-11	2.18634e-11
14.96	1.55449e-11	1.64165e-11		1.70118e-11	1.72985e-11	2.15121e-11	1.93525e-11	1.30459e-11	1.78608e-11	2.40826e-11	1.78732e-11	3.81873e-11	1.72778e-11	2.19497e-11	1.90079e-11	1.8615e-11	2.08083e-11	1.84061e-11	2.18591e-11
14.98	1.55472e-11	1.64236e-11		1.70139e-11	1.72954e-11	2.15248e-11	1.93388e-11	1.30472e-11	1.78568e-11	2.4082e-11	1.78766e-11	3.81872e-11	1.72799e-11	2.19443e-11	1.89995e-11	1.86166e-11	2.0807e-11	1.84025e-11	2.18632e-11
15	1.55403e-11	1.64203e-11		1.70094e-11	1.72939e-11	2.15371e-11	1.93338e-11	1.30444e-11	1.78591e-11	2.40753e-11	1.78714e-11	3.81944e-11	1.72803e-11	2.19465e-11	1.90037e-11	1.86111e-11	2.08153e-11	1.84051e-11	2.18552e-11
15.02	1.55468e-11	1.64174e-11		1.70095e-11	1.72945e-11	2.15385e-11	1.93198e-11	1.30485e-11	1.78629e-11	2.40816e-11	1.78722e-11	3.81864e-11	1.72891e-11	2.19502e-11	1.89987e-11	1.86176e-11	2.08154e-11	1.84034e-11	2.18565e-11
15.04	1.55342e-11	1.642e-11		1.70108e-11	1.72878e-11	2.15357e-11	1.93382e-11	1.30507e-11	1.78717e-11	2.40844e-11	1.78746e-11	3.81857e-11	1.72729e-11	2.19463e-11	1.90089e-11	1.862e-11	2.08149e-11	1.84008e-11	2.18626e-11
15.06	1.55296e-11	1.64091e-11		1.70125e-11	1.72942e-11	2.15308e-11	1.93353e-11	1.30521e-11	1.7859e-11	2.40803e-11	1.78763e-11	3.81887e-11	1.72754e-11	2.19464e-11	1.90082e-11	1.86168e-11	2.08181e-11	1.8402e-11	2.18553e-11
15.08	1.55485e-11	1.64197e-11		1.70104e-11	1.72951e-11	2.15256e-11	1.93388e-11	1.30488e-11	1.78586e-11	2.4083e-11	1.78745e-11	3.81785e-11	1.72835e-11	2.19501e-11	1.90103e-11	1.86237e-11	2.08171e-11	1.84028e-11	2.18614e-11
15.1	1.55421e-11	1.64195e-11		1.70046e-11	1.72924e-11	2.15301e-11	1.93049e-11	1.30496e-11	1.78618e-11	2.40778e-11	1.7873e-11	3.81824e-11	1.72827e-11	2.19418e-11	1.90048e-11	1.86193e-11	2.0814e-11	1.83977e-11	2.1856e-11
15.12	1.55369e-11	1.64202e-11		1.70046e-11	1.7299e-11	2.15341e-11	1.9324e-11	1.30489e-11	1.78699e-11	2.40823e-11	1.78736e-11	3.8186e-11	1.7291e-11	2.19471e-11	1.90061e-11	1.86136e-11	2.08088e-11	1.84052e-11	2.18581e-11
15.14	1.55246e-11	1.64219e-11		1.70099e-11	1.72922e-11	2.15295e-11	1.93399e-11	1.30501e-11	1.78646e-11	2.40769e-11	1.78709e-11	3.81859e-11	1.72778e-11	2.19447e-11	1.90145e-11	1.86176e-11	2.08181e-11	1.84034e-11	2.18576e-11
15.16	1.55397e-11	1.64218e-11		1.70106e-11	1.7293e-11	2.15309e-11	1.93179e-11	1.30472e-11	1.7864e-11	2.40728e-11	1.78741e-11	3.81847e-11	1.72806e-11	2.19373e-11	1.90074e-11	1.86144e-11	2.08142e-11	1.8402e-11	2.18524e-11
15.18	1.55265e-11	1.64244e-11		1.70023e-11	1.72989e-11	2.15243e-11	1.93468e-11	1.30489e-11	1.78624e-11	2.40837e-11	1.78687e-11	3.81932e-11	1.72702e-11	2.19427e-11	1.90164e-11	1.86112e-11	2.08215e-11	1.8405e-11	2.18543e-11
15.2	1.55276e-11	1.64255e-11		1.70067e-11	1.72906e-11	2.15201e-11	1.93382e-11	1.30495e-11	1.78666e-11	2.40772e-11	1.78769e-11	3.8192e-11	1.72808e-11	2.19417e-11	1.90093e-11	1.8618e-11	2.082e-11	1.84013e-11	2.18563e-11
15.22	1.55348e-11	1.64216e-11		1.70104e-11	1.72922e-11	2.15279e-11	1.93052e-11	1.30502e-11	1.78766e-11	2.40839e-11	1.7875e-11	3.81826e-11	1.72865e-11	2.19503e-11	1.9007e-11	1.86132e-11	2.08078e-11	1.84043e-11	2.18515e-11
15.24	1.55396e-11	1.64139e-11		1.70103e-11	1.72891e-11	2.15329e-11	1.93405e-11	1.30531e-11	1.78723e-11	2.40814e-11	1.78783e-11	3.81864e-11	1.72908e-11	2.1944e-11	1.90119e-11	1.86155e-11	2.08184e-11	1.83998e-11	2.1855e-11
15.26	1.55384e-11	1.64173e-11		1.70118e-11	1.7298e-11	2.15297e-11	1.93438e-11	1.3052e-11	1.78755e-11	2.40851e-11	1.7874e-11	3.81917e-11	1.72902e-11	2.1945e-11	1.90094e-11	1.86162e-11	2.08167e-11	1.8402e-11	2.18652e-11
15.28	1.55389e-11	1.64128e-11		1.7012e-11	1.72982e-11	2.15299e-11	1.93151e-11	1.30506e-11	1.78693e-11	2.40783e-11	1.78652e-11	3.81931e-11	1.72744e-11	2.1949e-11	1.90104e-11	1.86196e-11	2.08166e-11	1.83984e-11	2.18477e-11
15.3	1.55251e-11	1.64195e-11		1.70068e-11	1.72918e-11	2.15265e-11	1.93313e-11	1.3046e-11	1.78801e-11	2.40767e-11	1.78738e-11	3.81859e-11	1.72652e-11	2.19534e-11	1.9018e-11	1.86198e-11	2.08122e-11	1.84039e-11	2.18538e-11
15.32	1.55255e-11	1.64174e-11		1.7005e-11	1.72979e-11	2.15201e-11	1.93279e-11	1.3048e-11	1.78798e-11	2.40777e-11	1.78721e-11	3.81902e-11	1.7255e-11	2.19484e-11	1.90043e-11	1.8614e-11	2.08076e-11	1.8407e-11	2.18533e-11
15.34	1.55185e-11	1.6419e-11		1.70112e-11	1.72988e-11	2.15214e-11	1.93221e-11	1.30483e-11	1.78706e-11	2.40864e-11	1.7874e-11	3.81905e-11	1.72609e-11	2.19454e-11	1.90125e-11	1.86166e-11	2.08121e-11	1.84034e-11	2.18511e-11
15.36	1.5528e-11	1.64261e-11		1.70097e-11	1.73011e-11	2.15283e-11	1.93198e-11	1.30519e-11	1.78679e-11	2.40757e-11	1.78708e-11	3.81833e-11	1.72585e-11	2.19481e-11	1.90119e-11	1.86213e-11	2.08064e-11	1.84118e-11	2.18484e-11
15.38	1.55358e-11	1.64194e-11		1.70066e-11	1.72995e-11	2.15355e-11	1.93292e-11	1.30513e-11	1.78698e-11	2.40741e-11	1.78722e-11	3.81876e-11	1.72543e-11	2.19418e-11	1.90158e-11	1.86172e-11	2.08136e-11	1.83997e-11	2.18539e-11
15.4	1.55291e-11	1.6402e-11		1.70076e-11	1.7303e-11	2.15252e-11	1.93187e-11	1.30534e-11	1.78749e-11	2.40801e-11	1.78743e-11	3.81878e-11	1.72706e-11	2.19491e-11	1.90086e-11	1.86147e-11	2.08161e-11	1.84024e-11	2.18513e-11
15.42	1.55296e-11	1.64142e-11		1.70107e-11	1.73042e-11	2.15357e-11	1.93433e-11	1.30496e-11	1.78767e-11	2.40808e-11	1.78758e-11	3.81967e-11	1.7269e-11	2.19499e-11	1.90051e-11	1.8619e-11	2.08124e-11	1.8411e-11	2.18613e-11
15.44	1.55254e-11	1.64116e-11		1.70124e-11	1.73003e-11	2.15262e-11	1.93309e-11	1.30485e-11	1.7864e-11	2.40719e-11	1.78667e-11	3.81855e-11	1.72549e-11	2.19563e-11	1.90095e-11	1.86229e-11	2.08193e-11	1.84002e-11	2.18538e-11
15.46	1.55238e-11	1.64146e-11		1.70062e-11	1.73002e-11	2.15315e-11	1.93205e-11	1.30486e-11	1.78689e-11	2.40772e-11	1.78801e-11	3.81917e-11	1.72642e-11	2.19481e-11	1.90136e-11	1.86148e-11	2.08215e-11	1.84011e-11	2.18532e-11
15.48	1.5531e-11	1.64103e-11		1.70113e-11	1.72967e-11	2.15325e-11	1.93278e-11	1.30488e-11	1.78692e-11	2.40751e-11	1.78757e-11	3.81854e-11	1.72689e-11	2.19491e-11	1.9011e-11	1.86182e-11	2.08138e-11	1.84017e-11	2.1858e-11
15.5	1.55356e-11	1.64165e-11		1.70073e-11	1.73046e-11	2.15265e-11	1.93481e-11	1.30456e-11	1.78669e-11	2.40814e-11	1.78753e-11	3.81921e-11	1.72601e-11	2.19454e-11	1.90027e-11	1.86158e-11	2.08108e-11	1.84057e-11	2.18533e-11
15.52	1.55344e-11	1.64126e-11		1.70042e-11	1.7298e-11	2.15214e-11	1.9336e-11	1.30471e-11	1.78659e-11	2.40783e-11	1.78766e-11	3.81866e-11	1.72671e-11	2.19492e-11	1.90074e-11	1.86159e-11	2.0814e-11	1.84099e-11	2.1857e-11
15.54	1.55208e-11	1.64147e-11		1.70033e-11	1.72978e-11	2.15292e-11	1.93332e-11	1.30509e-11	1.78638e-11	2.40771e-11	1.78756e-11	3.82008e-11	1.72753e-11	2.19491e-11	1.90061e-11	1.86128e-11	2.08111e-11	1.84012e-11	2.18533e-11
15.56	1.55203e-11	1.6415e-11		1.70084e-11	1.73027e-11	2.15334e-11	1.93186e-11	1.30476e-11	1.78619e-11	2.40764e-11	1.78776e-11	3.8197e-11	1.72694e-11	2.19452e-11	1.90075e-11	1.86153e-11	2.082e-11	1.8401e-11	2.18575e-11
15.58	1.55154e-11	1.64138e-11		1.70067e-11	1.72973e-11	2.15334e-11	1.93467e-11	1.30505e-11	1.78551e-11	2.40752e-11	1.78801e-11	3.81909e-11	1.72596e-11	2.19466e-11	1.90208e-11	1.86173e-11	2.08108e-11	1.84042e-11	2.18528e-11
15.6	1.5509e-11	1.64114e-11		1.7008e-11	1.72977e-11	2.15231e-11	1.9317e-11	1.3049e-11	1.78578e-11	2.40855e-11	1.78756e-11	3.81955e-11	1.72586e-11	2.19466e-11	1.90138e-11	1.86185e-11	2.08172e-11	1.84006e-11	2.18509e-11
15.62	1.55176e-11	1.64149e-11		1.70076e-11	1.7298e-11	2.15265e-11	1.93189e-11	1.30475e-11	1.78537e-11	2.40767e-11	1.78768e-11	3.81901e-11	1.72631e-11	2.19483e-11	1.90125e-11	1.86156e-11	2.0815e-11	1.84048e-11	2.18541e-11
15.64	1.55172e-11	1.64092e-11		1.70111e-11	1.7302e-11	2.15262e-11	1.93151e-11	1.3046e-11	1.78534e-11	2.40813e-11	1.78758e-11	3.81906e-11	1.72762e-11	2.19474e-11	1.90066e-11	1.86142e-11	2.08181e-11	1.83945e-11	2.18552e-11
15.66	1.55079e-11	1.64184e-11		1.70098e-11	1.73001e-11	2.15257e-11	1.93318e-11	1.30514e-11	1.78605e-11	2.40795e-11	1.78762e-11	3.81898e-11	1.72681e-11	2.19449e-11	1.90071e-11	1.86168e-11	2.08175e-11	1.84051e-11	2.18541e-11
15.68	1.55132e-11	1.64163e-11		1.70109e-11	1.73003e-11	2.15274e-11	1.92969e-11	1.30516e-11	1.78466e-11	2.40779e-11	1.78747e-11	3.81899e-11	1.72785e-11	2.19445e-11	1.90106e-11	1.86136e-11	2.08189e-11	1.84084e-11	2.1855e-11
15.7	1.55154e-11	1.64162e-11		1.70118e-11	1.73014e-11	2.15261e-11	1.93065e-11	1.30508e-11	1.78542e-11	2.40795e-11	1.78745e-11	3.8198e-11	1.72724e-11	2.19501e-11	1.90025e-11	1.86171e-11	2.08202e-11	1.84049e-11	2.1854e-11
15.72	1.55245e-11	1.64205e-11		1.70182e-11	1.73022e-11	2.15245e-11	1.93306e-11	1.30519e-11	1.78512e-11	2.40854e-11	1.78737e-11	3.81975e-11	1.72682e-11	2.19482e-11	1.90119e-11	1.862e-11	2.082e-11	1.8403e-11	2.18576e-11
15.74	1.55179e-11	1.64179e-11		1.70069e-11	1.72934e-11	2.15287e-11	1.93159e-11	1.30502e-11	1.78446e-11	2.40778e-11	1.78698e-11	3.81906e-11	1.72545e-11	2.19507e-11	1.90059e-11	1.86211e-11	2.08233e-11	1.84001e-11	2.185e-11
15.76	1.55252e-11	1.64088e-11		1.70072e-11	1.72989e-11	2.15332e-11	1.93404e-11	1.30532e-11	1.7848e-11	2.40786e-11	1.78776e-11	3.81931e-11	1.72593e-11	2.19475e-11	1.9009e-11	1.86175e-11	2.08174e-11	1.83998e-11	2.18509e-11
15.78	1.552e-11	1.6401e-11		1.70032e-11	1.7298e-11	2.15287e-11	1.93171e-11	1.30521e-11	1.78494e-11	2.40777e-11	1.78745e-11	3.81823e-11	1.72485e-11	2.19463e-11	1.90041e-11	1.86161e-11	2.08093e-11	1.84065e-11	2.1853e-11
15.8	1.55109e-11	1.64138e-11		1.70074e-11	1.72991e-11	2.1522e-11	1.92996e-11	1.30457e-11	1.78455e-11	2.40788e-11	1.78799e-11	3.81927e-11	1.72573e-11	2.19467e-11	1.90046e-11	1.86159e-11	2.0811e-11	1.84048e-11	2.18498e-11
15.82	1.55238e-11	1.64208e-11		1.69987e-11	1.73026e-11	2.15281e-11	1.93482e-11	1.30538e-11	1.78382e-11	2.40724e-11	1.78797e-11	3.81826e-11	1.72541e-11	2.19546e-11	1.90066e-11	1.86231e-11	2.0808e-11	1.84094e-11	2.18508e-11
15.84	1.55143e-11	1.64212e-11		1.70003e-11	1.73063e-11	2.15317e-11	1.93365e-11	1.3054e-11	1.78398e-11	2.40777e-11	1.78737e-11	3.81895e-11	1.72701e-11	2.19477e-11	1.90124e-11	1.86199e-11	2.08117e-11	1.83999e-11	2.18586e-11
15.86	1.55199e-11	1.64061e-11		1.69973e-11	1.73006e-11	2.15301e-11	1.93256e-11	1.3058e-11	1.78386e-11	2.40787e-11	1.78712e-11	3.81871e-11	1.72506e-11	2.19487e-11	1.90057e-11	1.86204e-11	2.08159e-11	1.84051e-11	2.18566e-11
15.88	1.55159e-11	1.64284e-11		1.69944e-11	1.73e-11	2.15298e-11	1.93333e-11	1.30507e-11	1.78354e-11	2.40805e-11	1.78732e-11	3.81833e-11	1.72592e-11	2.19459e-11	1.89993e-11	1.86207e-11	2.0815e-11	1.8401e-11	2.18547e-11
15.9	1.5516e-11	1.64165e-11		1.6997e-11	1.72968e-11	2.15308e-11	1.93091e-11	1.30475e-11	1.78364e-11	2.40851e-11	1.78768e-11	3.81882e-11	1.72571e-11	2.19483e-11	1.90081e-11	1.86151e-11	2.0813e-11	1.83994e-11	2.18463e-11
15.92	1.5508e-11	1.64133e-11		1.69967e-11	1.73037e-11	2.15286e-11	1.93399e-11	1.30454e-11	1.7841e-11	2.40784e-11	1.78794e-11	3.81923e-11	1.725e-11	2.19477e-11	1.89985e-11	1.86151e-11	2.0824e-11	1.83956e-11	2.18543e-11
15.94	1.552e-11	1.64157e-11		1.69957e-11	1.73017e-11	2.15276e-11	1.93119e-11	1.30512e-11	1.78341e-11	2.40787e-11	1.78793e-11	3.81994e-11	1.72528e-11	2.195e-11	1.90039e-11	1.86152e-11	2.08276e-11	1.83959e-11	2.1856e-11
15.96	1.55226e-11	1.64199e-11		1.69909e-11	1.72937e-11	2.15364e-11	1.9316e-11	1.30521e-11	1.78337e-11	2.40793e-11	1.78744e-11	3.8195e-11	1.7258e-11	2.1948e-11	1.9008e-11	1.8617e-11	2.08215e-11	1.8404e-11	2.18635e-11
15.98	1.55191e-11	1.64187e-11		1.69936e-11	1.72974e-11	2.15293e-11	1.9317e-11	1.30515e-11	1.78294e-11	2.40748e-11	1.78735e-11	3.81965e-11	1.72417e-11	2.19421e-11	1.90059e-11	1.8613e-11	2.0827e-11	1.84064e-11	2.18453e-11
16	1.55192e-11	1.64158e-11		1.69966e-11	1.73029e-11	2.15362e-11	1.93142e-11	1.3054e-11	1.7828e-11	2.4082e-11	1.78769e-11	3.81831e-11	1.72499e-11	2.19486e-11	1.90085e-11	1.86154e-11	2.08151e-11	1.84019e-11	2.18506e-11
16.02	1.55181e-11	1.64666e-11		1.69885e-11	1.72973e-11	2.15301e-11	1.93103e-11	1.30519e-11	1.78309e-11	2.40861e-11	1.78692e-11	3.81905e-11	1.7251e-11	2.19459e-11	1.90127e-11	1.86167e-11	2.0819e-11	1.83974e-11	2.18526e-11
16.04	1.55162e-11	1.64807e-11		1.69961e-11	1.72955e-11	2.15275e-11	1.93078e-11	1.30573e-11	1.78262e-11	2.40816e-11	1.78764e-11	3.8186e-11	1.72586e-11	2.19486e-11	1.89968e-11	1.86129e-11	2.08112e-11	1.84025e-11	2.1851e-11
16.06	1.5521e-11	1.64791e-11		1.69953e-11	1.731e-11	2.15316e-11	1.93374e-11	1.3056e-11	1.783e-11	2.40846e-11	1.78789e-11	3.81974e-11	1.72385e-11	2.19492e-11	1.90023e-11	1.86214e-11	2.08257e-11	1.84004e-11	2.18629e-11
16.08	1.55092e-11	1.64889e-11		1.69973e-11	1.73e-11	2.15275e-11	1.93055e-11	1.30514e-11	1.78201e-11	2.40813e-11	1.78772e-11	3.81996e-11	1.72665e-11	2.19432e-11	1.90019e-11	1.86175e-11	2.08134e-11	1.84006e-11	2.18641e-11
16.1	1.55221e-11	1.64906e-11		1.69941e-11	1.72948e-11	2.15248e-11	1.93371e-11	1.30504e-11	1.78264e-11	2.40816e-11	1.78747e-11	3.81958e-11	1.72563e-11	2.19493e-11	1.90081e-11	1.86159e-11	2.08227e-11	1.84018e-11	2.18564e-11
16.12	1.55163e-11	1.64888e-11		1.69938e-11	1.73065e-11	2.1516e-11	1.9309e-11	1.3053e-11	1.78279e-11	2.40902e-11	1.78762e-11	3.81911e-11	1.72705e-11	2.19494e-11	1.89983e-11	1.86163e-11	2.08249e-11	1.84058e-11	2.18595e-11
16.14	1.55122e-11	1.6489e-11		1.69946e-11	1.73055e-11	2.15156e-11	1.93419e-11	1.30504e-11	1.78243e-11	2.40901e-11	1.78769e-11	3.81905e-11	1.72566e-11	2.19509e-11	1.90048e-11	1.86181e-11	2.08237e-11	1.84029e-11	2.18662e-11
16.16	1.55154e-11	1.64844e-11		1.69956e-11	1.73053e-11	2.15207e-11	1.9326e-11	1.30516e-11	1.78223e-11	2.40838e-11	1.78771e-11	3.81943e-11	1.72506e-11	2.19506e-11	1.9002e-11	1.86208e-11	2.08143e-11	1.84037e-11	2.18547e-11
16.18	1.55137e-11	1.64892e-11		1.69963e-11	1.73045e-11	2.15228e-11	1.93267e-11	1.30554e-11	1.78238e-11	2.40878e-11	1.78804e-11	3.81925e-11	1.72472e-11	2.1947e-11	1.90018e-11	1.86183e-11	2.08134e-11	1.84018e-11	2.18606e-11
16.2	1.55168e-11	1.64937e-11		1.69972e-11	1.73051e-11	2.15303e-11	1.93115e-11	1.30534e-11	1.78234e-11	2.40833e-11	1.78752e-11	3.81854e-11	1.72698e-11	2.19492e-11	1.89999e-11	1.86167e-11	2.0823e-11	1.84036e-11	2.18612e-11
16.22	1.55158e-11	1.6483e-11		1.69972e-11	1.7299e-11	2.1533e-11	1.93084e-11	1.30484e-11	1.7822e-11	2.40863e-11	1.78814e-11	3.81887e-11	1.72654e-11	2.19457e-11	1.89975e-11	1.86206e-11	2.08257e-11	1.84007e-11	2.18522e-11
16.24	1.55235e-11	1.64835e-11		1.69962e-11	1.73002e-11	2.15282e-11	1.93115e-11	1.30527e-11	1.78229e-11	2.40826e-11	1.78817e-11	3.81966e-11	1.72628e-11	2.19438e-11	1.90044e-11	1.86206e-11	2.08184e-11	1.84064e-11	2.18542e-11
16.26	1.55229e-11	1.64857e-11		1.70012e-11	1.72993e-11	2.15195e-11	1.93242e-11	1.30511e-11	1.78186e-11	2.40833e-11	1.78714e-11	3.81819e-11	1.72555e-11	2.19489e-11	1.90089e-11	1.86189e-11	2.08201e-11	1.84084e-11	2.18569e-11
16.28	1.55205e-11	1.64883e-11		1.69985e-11	1.7299e-11	2.15212e-11	1.93388e-11	1.30499e-11	1.78168e-11	2.40793e-11	1.78775e-11	3.81974e-11	1.72679e-11	2.19512e-11	1.89969e-11	1.86147e-11	2.08242e-11	1.84071e-11	2.18602e-11
16.3	1.55211e-11	1.64883e-11		1.70006e-11	1.73067e-11	2.15223e-11	1.93338e-11	1.30543e-11	1.78208e-11	2.40819e-11	1.78727e-11	3.81888e-11	1.72563e-11	2.19458e-11	1.89997e-11	1.8621e-11	2.08078e-11	1.84095e-11	2.18567e-11
16.32	1.55062e-11	1.64926e-11		1.69975e-11	1.73072e-11	2.1528e-11	1.93261e-11	1.30536e-11	1.78168e-11	2.40819e-11	1.78746e-11	3.81857e-11	1.72455e-11	2.19473e-11	1.90074e-11	1.862e-11	2.08234e-11	1.84077e-11	2.18533e-11
16.34	1.5517e-11	1.64929e-11		1.69962e-11	1.73061e-11	2.15245e-11	1.93238e-11	1.305e-11	1.78209e-11	2.40859e-11	1.788e-11	3.81911e-11	1.7252e-11	2.19476e-11	1.90012e-11	1.86218e-11	2.08188e-11	1.84041e-11	2.18587e-11
16.36	1.55177e-11	1.64854e-11		1.70015e-11	1.73029e-11	2.15188e-11	1.9322e-11	1.30537e-11	1.78201e-11	2.40822e-11	1.78757e-11	3.8196e-11	1.7246e-11	2.19364e-11	1.90035e-11	1.86167e-11	2.0816e-11	1.84081e-11	2.18555e-11
16.38	1.55079e-11	1.64883e-11		1.70027e-11	1.73012e-11	2.15283e-11	1.93162e-11	1.30533e-11	1.78186e-11	2.40806e-11	1.78694e-11	3.81896e-11	1.72445e-11	2.19518e-11	1.90054e-11	1.86225e-11	2.08206e-11	1.84062e-11	2.18478e-11
16.4	1.55101e-11	1.64899e-11		1.69999e-11	1.73093e-11	2.15298e-11	1.93108e-11	1.30471e-11	1.78189e-11	2.4084e-11	1.78726e-11	3.81856e-11	1.72373e-11	2.19532e-11	1.90176e-11	1.86127e-11	2.08234e-11	1.84077e-11	2.18576e-11
16.42	1.55197e-11	1.64978e-11		1.70029e-11	1.73075e-11	2.1521e-11	1.93219e-11	1.30523e-11	1.78162e-11	2.40928e-11	1.78762e-11	3.81924e-11	1.72422e-11	2.19456e-11	1.89999e-11	1.86168e-11	2.08241e-11	1.84078e-11	2.18614e-11
16.44	1.55059e-11	1.64848e-11		1.69995e-11	1.73002e-11	2.15198e-11	1.93284e-11	1.30498e-11	1.78175e-11	2.40849e-11	1.78717e-11	3.81965e-11	1.72408e-11	2.19492e-11	1.90112e-11	1.86201e-11	2.08259e-11	1.84109e-11	2.18584e-11
16.46	1.55117e-11	1.64753e-11		1.6999e-11	1.73029e-11	2.15137e-11	1.93315e-11	1.30472e-11	1.78125e-11	2.4079e-11	1.787e-11	3.8192e-11	1.72476e-11	2.19536e-11	1.90057e-11	1.86215e-11	2.08153e-11	1.84011e-11	2.18553e-11
16.48	1.55011e-11	1.64866e-11		1.70039e-11	1.73049e-11	2.15276e-11	1.93108e-11	1.30496e-11	1.78072e-11	2.40793e-11	1.78709e-11	3.8191e-11	1.72422e-11	2.19437e-11	1.89989e-11	1.86146e-11	2.08293e-11	1.83999e-11	2.1859e-11
16.5	1.55068e-11	1.64875e-11		1.69985e-11	1.73123e-11	2.15225e-11	1.93124e-11	1.3046e-11	1.78119e-11	2.408e-11	1.7876e-11	3.81895e-11	1.72375e-11	2.1948e-11	1.9008e-11	1.86205e-11	2.08221e-11	1.84077e-11	2.1856e-11
16.52	1.55025e-11	1.64799e-11		1.70045e-11	1.73064e-11	2.15189e-11	1.93325e-11	1.3049e-11	1.78137e-11	2.40855e-11	1.78794e-11	3.8184e-11	1.72413e-11	2.19471e-11	1.89984e-11	1.86146e-11	2.08227e-11	1.8406e-11	2.18602e-11
16.54	1.55001e-11	1.64822e-11		1.70067e-11	1.73083e-11	2.15166e-11	1.93404e-11	1.30518e-11	1.78102e-11	2.40822e-11	1.78747e-11	3.81933e-11	1.7247e-11	2.19524e-11	1.90071e-11	1.86143e-11	2.08115e-11	1.84055e-11	2.18643e-11
16.56	1.55136e-11	1.64867e-11		1.70034e-11	1.73126e-11	2.15196e-11	1.93302e-11	1.30444e-11	1.7809e-11	2.40848e-11	1.78707e-11	3.81967e-11	1.72415e-11	2.19491e-11	1.90121e-11	1.86176e-11	2.08262e-11	1.84027e-11	2.18607e-11
16.58	1.5502e-11	1.6488e-11		1.70103e-11	1.73093e-11	2.15155e-11	1.93246e-11	1.30539e-11	1.78118e-11	2.40826e-11	1.78757e-11	3.81884e-11	1.72226e-11	2.19544e-11	1.90045e-11	1.86217e-11	2.08141e-11	1.84041e-11	2.18687e-11
16.6	1.55087e-11	1.6484e-11		1.70042e-11	1.73066e-11	2.15165e-11	1.93408e-11	1.30547e-11	1.78146e-11	2.40898e-11	1.78721e-11	3.81863e-11	1.72361e-11	2.1947e-11	1.90076e-11	1.86179e-11	2.08171e-11	1.84054e-11	2.18634e-11
16.62	1.54938e-11	1.64786e-11		1.70048e-11	1.7306e-11	2.15188e-11	1.93252e-11	1.30494e-11	1.78106e-11	2.40837e-11	1.78829e-11	3.8195e-11	1.72474e-11	2.19506e-11	1.90053e-11	1.8621e-11	2.08203e-11	1.84018e-11	2.18551e-11
16.64	1.55018e-11	1.64765e-11		1.70012e-11	1.73062e-11	2.15289e-11	1.93119e-11	1.30511e-11	1.78142e-11	2.40844e-11	1.78774e-11	3.81869e-11	1.72391e-11	2.19487e-11	1.90114e-11	1.8617e-11	2.08312e-11	1.84016e-11	2.18613e-11
16.66	1.55128e-11	1.64718e-11		1.7007e-11	1.73108e-11	2.15331e-11	1.93475e-11	1.30532e-11	1.78084e-11	2.40845e-11	1.78734e-11	3.8188e-11	1.72473e-11	2.19509e-11	1.90114e-11	1.86161e-11	2.0814e-11	1.8401e-11	2.18594e-11
16.68	1.55109e-11	1.64744e-11		1.70075e-11	1.73023e-11	2.15264e-11	1.93208e-11	1.3058e-11	1.78056e-11	2.40787e-11	1.78749e-11	3.81896e-11	1.72715e-11	2.19505e-11	1.90064e-11	1.86186e-11	2.08263e-11	1.84116e-11	2.18604e-11
16.7	1.5504e-11	1.64791e-11		1.70092e-11	1.73052e-11	2.1522e-11	1.92966e-11	1.30442e-11	1.78092e-11	2.40867e-11	1.7873e-11	3.81922e-11	1.72589e-11	2.19527e-11	1.90099e-11	1.86223e-11	2.08261e-11	1.84023e-11	2.18556e-11
16.72	1.55161e-11	1.64708e-11		1.70121e-11	1.73053e-11	2.15164e-11	1.93172e-11	1.30534e-11	1.77988e-11	2.40786e-11	1.7879e-11	3.81938e-11	1.72673e-11	2.19517e-11	1.90097e-11	1.86223e-11	2.08215e-11	1.84096e-11	2.18674e-11
16.74	1.55169e-11	1.6479e-11		1.70058e-11	1.73084e-11	2.15177e-11	1.9334e-11	1.30499e-11	1.781e-11	2.40876e-11	1.78766e-11	3.81895e-11	1.72642e-11	2.19542e-11	1.90006e-11	1.86135e-11	2.08225e-11	1.83996e-11	2.1862e-11
16.76	1.55086e-11	1.64787e-11		1.70104e-11	1.73089e-11	2.15138e-11	1.9312e-11	1.30477e-11	1.78004e-11	2.40806e-11	1.78748e-11	3.81906e-11	1.72392e-11	2.19459e-11	1.90042e-11	1.86131e-11	2.08232e-11	1.84033e-11	2.18582e-11
16.78	1.55049e-11	1.64744e-11		1.70111e-11	1.72998e-11	2.15311e-11	1.93175e-11	1.30526e-11	1.78011e-11	2.4077e-11	1.78713e-11	3.81885e-11	1.72424e-11	2.1961e-11	1.90079e-11	1.86146e-11	2.08224e-11	1.8407e-11	2.18625e-11
16.8	1.55119e-11	1.64796e-11		1.70197e-11	1.73072e-11	2.15273e-11	1.92931e-11	1.30492e-11	1.78107e-11	2.40799e-11	1.78707e-11	3.8191e-11	1.7227e-11	2.19508e-11	1.90111e-11	1.86184e-11	2.08239e-11	1.83993e-11	2.18592e-11
16.82	1.55054e-11	1.64812e-11		1.70153e-11	1.7301e-11	2.15257e-11	1.9311e-11	1.30485e-11	1.78013e-11	2.40741e-11	1.78716e-11	3.81959e-11	1.72426e-11	2.19459e-11	1.90089e-11	1.8617e-11	2.08242e-11	1.84028e-11	2.18582e-11
16.84	1.55156e-11	1.64905e-11		1.7012e-11	1.73078e-11	2.15157e-11	1.93188e-11	1.30482e-11	1.78079e-11	2.408e-11	1.78774e-11	3.81944e-11	1.72383e-11	2.19517e-11	1.90036e-11	1.86176e-11	2.08208e-11	1.84049e-11	2.18632e-11
16.86	1.5507e-11	1.6482e-11		1.70148e-11	1.73053e-11	2.15181e-11	1.92947e-11	1.30505e-11	1.7808e-11	2.40771e-11	1.78743e-11	3.82022e-11	1.72419e-11	2.19501e-11	1.90027e-11	1.8611e-11	2.082e-11	1.84028e-11	2.18636e-11
16.88	1.55087e-11	1.6483e-11		1.70157e-11	1.73059e-11	2.15214e-11	1.9314e-11	1.30473e-11	1.78103e-11	2.40787e-11	1.78692e-11	3.81942e-11	1.72523e-11	2.19508e-11	1.90077e-11	1.86188e-11	2.08181e-11	1.84038e-11	2.1865e-11
16.9	1.55041e-11	1.64831e-11		1.70184e-11	1.73135e-11	2.15264e-11	1.93329e-11	1.305e-11	1.78008e-11	2.40812e-11	1.78714e-11	3.81806e-11	1.72467e-11	2.19499e-11	1.90036e-11	1.86253e-11	2.08183e-11	1.84072e-11	2.18566e-11
16.92	1.55127e-11	1.64838e-11		1.70181e-11	1.7307e-11	2.15309e-11	1.93512e-11	1.30522e-11	1.78017e-11	2.40786e-11	1.78742e-11	3.81935e-11	1.72444e-11	2.19494e-11	1.90132e-11	1.86179e-11	2.08172e-11	1.84068e-11	2.18509e-11
16.94	1.55202e-11	1.64784e-11		1.702e-11	1.73051e-11	2.15252e-11	1.93222e-11	1.30485e-11	1.77999e-11	2.40831e-11	1.78716e-11	3.81901e-11	1.72315e-11	2.19495e-11	1.90075e-11	1.86192e-11	2.08228e-11	1.84093e-11	2.18607e-11
16.96	1.55117e-11	1.64845e-11		1.7019e-11	1.73172e-11	2.15218e-11	1.93007e-11	1.30511e-11	1.7805e-11	2.40836e-11	1.78762e-11	3.81834e-11	1.72322e-11	2.19565e-11	1.9017e-11	1.86144e-11	2.08179e-11	1.84025e-11	2.1855e-11
16.98	1.55071e-11	1.64881e-11		1.70233e-11	1.73104e-11	2.15254e-11	1.93228e-11	1.3048e-11	1.78036e-11	2.40808e-11	1.78757e-11	3.81954e-11	1.72374e-11	2.19459e-11	1.90048e-11	1.86175e-11	2.08205e-11	1.84073e-11	2.18618e-11
17	1.55126e-11	1.6474e-11		1.7024e-11	1.7308e-11	2.15304e-11	1.93144e-11	1.30425e-11	1.78056e-11	2.40847e-11	1.787e-11	3.81891e-11	1.72403e-11	2.19422e-11	1.90079e-11	1.86212e-11	2.08219e-11	1.84065e-11	2.18502e-11
17.02	1.55072e-11	1.64797e-11		1.70229e-11	1.73049e-11	2.15242e-11	1.9322e-11	1.30501e-11	1.7798e-11	2.40787e-11	1.78738e-11	3.8188e-11	1.72417e-11	2.19449e-11	1.90115e-11	1.86186e-11	2.08258e-11	1.84021e-11	2.18557e-11
17.04	1.55064e-11	1.64756e-11		1.70213e-11	1.73116e-11	2.15283e-11	1.93018e-11	1.30518e-11	1.7805e-11	2.40795e-11	1.78768e-11	3.81987e-11	1.72521e-11	2.19462e-11	1.90085e-11	1.86176e-11	2.08171e-11	1.84033e-11	2.18514e-11
17.06	1.54994e-11	1.64815e-11		1.70283e-11	1.73051e-11	2.15298e-11	1.93052e-11	1.30469e-11	1.77999e-11	2.40848e-11	1.78717e-11	3.8184e-11	1.72469e-11	2.1948e-11	1.90065e-11	1.86259e-11	2.08293e-11	1.83989e-11	2.18629e-11
17.08	1.55033e-11	1.64763e-11		1.70265e-11	1.73109e-11	2.15209e-11	1.93129e-11	1.3042e-11	1.7802e-11	2.40841e-11	1.787e-11	3.81905e-11	1.72523e-11	2.19479e-11	1.90121e-11	1.86168e-11	2.08209e-11	1.84074e-11	2.18583e-11
17.1	1.55001e-11	1.64705e-11		1.70339e-11	1.73084e-11	2.15337e-11	1.9285e-11	1.30502e-11	1.78054e-11	2.40781e-11	1.78773e-11	3.81867e-11	1.72472e-11	2.1949e-11	1.90048e-11	1.86196e-11	2.08264e-11	1.84016e-11	2.18644e-11
17.12	1.55058e-11	1.64713e-11		1.70365e-11	1.73102e-11	2.15322e-11	1.93096e-11	1.30453e-11	1.7805e-11	2.40795e-11	1.78736e-11	3.8193e-11	1.72468e-11	2.19497e-11	1.90091e-11	1.86152e-11	2.08275e-11	1.84102e-11	2.18621e-11
17.14	1.54989e-11	1.6466e-11		1.70317e-11	1.73095e-11	2.15353e-11	1.92796e-11	1.30445e-11	1.78036e-11	2.40815e-11	1.78779e-11	3.81974e-11	1.72546e-11	2.1947e-11	1.90142e-11	1.86209e-11	2.08247e-11	1.84118e-11	2.1858e-11
17.16	1.54946e-11	1.64703e-11		1.70305e-11	1.73103e-11	2.15404e-11	1.93091e-11	1.3042e-11	1.78071e-11	2.40855e-11	1.78703e-11	3.81924e-11	1.72461e-11	2.19506e-11	1.89988e-11	1.86153e-11	2.08283e-11	1.84076e-11	2.18585e-11
17.18	1.54949e-11	1.64655e-11		1.70281e-11	1.73079e-11	2.15267e-11	1.93243e-11	1.30422e-11	1.78027e-11	2.40886e-11	1.78712e-11	3.81908e-11	1.72488e-11	2.19468e-11	1.90086e-11	1.86188e-11	2.08282e-11	1.84051e-11	2.18613e-11
17.2	1.54961e-11	1.64718e-11		1.70393e-11	1.7307e-11	2.15416e-11	1.93103e-11	1.3043e-11	1.78019e-11	2.40854e-11	1.78717e-11	3.81925e-11	1.72562e-11	2.19519e-11	1.90087e-11	1.86168e-11	2.08268e-11	1.84047e-11	2.18555e-11
17.22	1.54923e-11	1.64699e-11		1.70339e-11	1.73097e-11	2.15408e-11	1.93011e-11	1.3044e-11	1.78011e-11	2.40811e-11	1.78786e-11	3.81938e-11	1.72564e-11	2.19484e-11	1.90111e-11	1.86177e-11	2.08218e-11	1.84104e-11	2.18657e-11
17.24	1.55042e-11	1.64671e-11		1.70326e-11	1.73177e-11	2.1525e-11	1.92993e-11	1.30402e-11	1.78033e-11	2.40857e-11	1.7872e-11	3.81927e-11	1.72656e-11	2.19459e-11	1.9004e-11	1.86193e-11	2.08301e-11	1.8403e-11	2.18594e-11
17.26	1.55024e-11	1.64738e-11		1.70379e-11	1.73125e-11	2.15345e-11	1.93414e-11	1.30465e-11	1.77991e-11	2.40835e-11	1.78751e-11	3.8195e-11	1.72587e-11	2.19388e-11	1.9007e-11	1.86217e-11	2.08267e-11	1.84029e-11	2.18478e-11
17.28	1.54971e-11	1.6466e-11		1.70382e-11	1.73116e-11	2.15373e-11	1.9293e-11	1.30454e-11	1.78057e-11	2.40774e-11	1.78709e-11	3.81888e-11	1.72866e-11	2.19518e-11	1.90032e-11	1.86187e-11	2.0826e-11	1.8411e-11	2.18603e-11
17.3	1.55026e-11	1.6466e-11		1.70392e-11	1.73153e-11	2.15313e-11	1.93099e-11	1.30465e-11	1.78119e-11	2.40844e-11	1.78749e-11	3.81964e-11	1.72655e-11	2.19475e-11	1.90139e-11	1.86184e-11	2.08241e-11	1.84033e-11	2.18564e-11
17.32	1.54952e-11	1.64667e-11		1.70441e-11	1.73071e-11	2.15332e-11	1.93223e-11	1.30431e-11	1.78044e-11	2.40833e-11	1.78724e-11	3.81877e-11	1.7287e-11	2.1944e-11	1.90191e-11	1.86193e-11	2.08308e-11	1.84007e-11	2.18636e-11
17.34	1.55029e-11	1.64702e-11		1.7048e-11	1.7311e-11	2.15269e-11	1.9308e-11	1.30443e-11	1.78062e-11	2.40793e-11	1.78748e-11	3.81944e-11	1.72962e-11	2.19485e-11	1.90092e-11	1.86157e-11	2.08258e-11	1.84061e-11	2.18571e-11
17.36	1.54998e-11	1.64775e-11		1.70436e-11	1.73081e-11	2.15292e-11	1.92908e-11	1.30442e-11	1.78111e-11	2.40882e-11	1.78737e-11	3.8189e-11	1.72811e-11	2.19467e-11	1.90209e-11	1.86133e-11	2.08251e-11	1.8402e-11	2.18611e-11
17.38	1.5502e-11	1.6462e-11		1.70484e-11	1.73069e-11	2.15396e-11	1.93154e-11	1.30424e-11	1.78096e-11	2.4084e-11	1.78696e-11	3.81989e-11	1.72676e-11	2.19464e-11	1.9016e-11	1.86182e-11	2.08216e-11	1.84034e-11	2.18582e-11
17.4	1.55079e-11	1.64631e-11		1.70487e-11	1.73165e-11	2.15319e-11	1.93068e-11	1.30416e-11	1.78117e-11	2.4081e-11	1.78718e-11	3.82008e-11	1.72707e-11	2.19444e-11	1.9014e-11	1.86212e-11	2.08218e-11	1.84095e-11	2.18576e-11
17.42	1.55039e-11	1.64615e-11		1.70503e-11	1.73083e-11	2.15294e-11	1.92928e-11	1.30349e-11	1.78071e-11	2.4084e-11	1.7873e-11	3.81971e-11	1.72679e-11	2.19472e-11	1.90183e-11	1.86177e-11	2.08271e-11	1.84015e-11	2.18563e-11
17.44	1.5499e-11	1.64613e-11		1.70446e-11	1.73111e-11	2.15273e-11	1.93178e-11	1.30431e-11	1.78164e-11	2.40799e-11	1.78694e-11	3.81913e-11	1.72696e-11	2.19441e-11	1.90195e-11	1.86144e-11	2.08317e-11	1.84021e-11	2.18553e-11
17.46	1.5494e-11	1.64743e-11		1.70481e-11	1.73123e-11	2.15311e-11	1.93317e-11	1.30433e-11	1.78131e-11	2.40861e-11	1.78716e-11	3.81889e-11	1.72582e-11	2.19481e-11	1.90134e-11	1.86186e-11	2.0832e-11	1.84005e-11	2.1855e-11
17.48	1.55008e-11	1.64644e-11		1.7056e-11	1.73163e-11	2.15297e-11	1.93251e-11	1.30427e-11	1.78189e-11	2.40875e-11	1.78749e-11	3.82053e-11	1.72643e-11	2.19438e-11	1.90087e-11	1.86224e-11	2.08293e-11	1.83994e-11	2.18531e-11
17.5	1.55008e-11	1.64542e-11		1.70495e-11	1.73113e-11	2.15303e-11	1.93138e-11	1.30415e-11	1.78191e-11	2.40839e-11	1.78772e-11	3.81849e-11	1.72572e-11	2.19459e-11	1.9009e-11	1.86156e-11	2.08259e-11	1.8404e-11	2.18538e-11
17.52	1.55031e-11	1.64579e-11		1.70558e-11	1.73081e-11	2.15322e-11	1.93165e-11	1.30408e-11	1.78138e-11	2.40805e-11	1.78766e-11	3.8194e-11	1.72526e-11	2.19482e-11	1.90191e-11	1.86196e-11	2.08291e-11	1.84057e-11	2.18538e-11
17.54	1.55069e-11	1.64641e-11		1.706e-11	1.73129e-11	2.15339e-11	1.93234e-11	1.30458e-11	1.78139e-11	2.40887e-11	1.78724e-11	3.81935e-11	1.72617e-11	2.19533e-11	1.9019e-11	1.86145e-11	2.08222e-11	1.8406e-11	2.18534e-11
17.56	1.55081e-11	1.64621e-11		1.7056e-11	1.73129e-11	2.15267e-11	1.93222e-11	1.30469e-11	1.78185e-11	2.40848e-11	1.78788e-11	3.8198e-11	1.72664e-11	2.19482e-11	1.90182e-11	1.86217e-11	2.0823e-11	1.84063e-11	2.18579e-11
17.58	1.55011e-11	1.64574e-11		1.70562e-11	1.73133e-11	2.15297e-11	1.93168e-11	1.30498e-11	1.78223e-11	2.40826e-11	1.78733e-11	3.81877e-11	1.72732e-11	2.19464e-11	1.90228e-11	1.86188e-11	2.08335e-11	1.84035e-11	2.18507e-11
17.6	1.55166e-11	1.64524e-11		1.70579e-11	1.73081e-11	2.15267e-11	1.93106e-11	1.30472e-11	1.78237e-11	2.40829e-11	1.78724e-11	3.81978e-11	1.7274e-11	2.19466e-11	1.90187e-11	1.86193e-11	2.08316e-11	1.84018e-11	2.18556e-11
17.62	1.55092e-11	1.64507e-11		1.70649e-11	1.73132e-11	2.15287e-11	1.93051e-11	1.30449e-11	1.78123e-11	2.40825e-11	1.78768e-11	3.81952e-11	1.72837e-11	2.19419e-11	1.90243e-11	1.8617e-11	2.08227e-11	1.84134e-11	2.18586e-11
17.64	1.5498e-11	1.6457e-11		1.70587e-11	1.73101e-11	2.15313e-11	1.93073e-11	1.30463e-11	1.78248e-11	2.40843e-11	1.78766e-11	3.81909e-11	1.72757e-11	2.19494e-11	1.90195e-11	1.86184e-11	2.08254e-11	1.84033e-11	2.18619e-11
17.66	1.54936e-11	1.64612e-11		1.70614e-11	1.73142e-11	2.15331e-11	1.92838e-11	1.30425e-11	1.78247e-11	2.40866e-11	1.78748e-11	3.81812e-11	1.72661e-11	2.1944e-11	1.90215e-11	1.86172e-11	2.0821e-11	1.84011e-11	2.18617e-11
17.68	1.55041e-11	1.64533e-11		1.70594e-11	1.73094e-11	2.15317e-11	1.93061e-11	1.30427e-11	1.78248e-11	2.40866e-11	1.78693e-11	3.81826e-11	1.72731e-11	2.19505e-11	1.90103e-11	1.86182e-11	2.08243e-11	1.8408e-11	2.18555e-11
17.7	1.55054e-11	1.64569e-11		1.70622e-11	1.73131e-11	2.15303e-11	1.92891e-11	1.30492e-11	1.78208e-11	2.40879e-11	1.78732e-11	3.81901e-11	1.72826e-11	2.19484e-11	1.9016e-11	1.86113e-11	2.08238e-11	1.84063e-11	2.18615e-11
17.72	1.55002e-11	1.64512e-11		1.70677e-11	1.73203e-11	2.15367e-11	1.92702e-11	1.30375e-11	1.78192e-11	2.40848e-11	1.78738e-11	3.81813e-11	1.72876e-11	2.19477e-11	1.90168e-11	1.8623e-11	2.083e-11	1.84082e-11	2.1862e-11
17.74	1.54888e-11	1.64618e-11		1.70719e-11	1.73116e-11	2.15379e-11	1.92682e-11	1.30469e-11	1.78285e-11	2.40876e-11	1.78751e-11	3.81918e-11	1.72757e-11	2.19476e-11	1.90071e-11	1.86126e-11	2.08287e-11	1.84032e-11	2.18582e-11
17.76	1.54912e-11	1.64601e-11		1.70641e-11	1.73153e-11	2.15415e-11	1.9309e-11	1.30442e-11	1.78296e-11	2.40876e-11	1.78764e-11	3.81893e-11	1.72653e-11	2.19497e-11	1.90089e-11	1.86144e-11	2.08314e-11	1.8411e-11	2.18603e-11
17.78	1.55043e-11	1.64537e-11		1.70742e-11	1.73127e-11	2.15324e-11	1.9268e-11	1.30396e-11	1.78282e-11	2.40843e-11	1.78784e-11	3.8185e-11	1.72703e-11	2.19496e-11	1.90131e-11	1.86132e-11	2.08317e-11	1.84081e-11	2.18553e-11
17.8	1.54944e-11	1.6449e-11		1.70722e-11	1.73152e-11	2.15292e-11	1.92861e-11	1.30471e-11	1.78253e-11	2.40864e-11	1.78783e-11	3.81978e-11	1.72611e-11	2.19479e-11	1.90112e-11	1.86165e-11	2.08334e-11	1.84073e-11	2.18521e-11
17.82	1.54935e-11	1.64523e-11		1.70656e-11	1.73132e-11	2.15429e-11	1.93112e-11	1.30468e-11	1.78342e-11	2.4089e-11	1.78763e-11	3.81874e-11	1.72704e-11	2.19418e-11	1.9018e-11	1.86175e-11	2.08238e-11	1.84036e-11	2.18562e-11
17.84	1.54978e-11	1.64575e-11		1.70745e-11	1.73155e-11	2.15455e-11	1.9326e-11	1.30426e-11	1.78355e-11	2.40867e-11	1.7872e-11	3.81941e-11	1.7283e-11	2.19494e-11	1.90228e-11	1.86197e-11	2.08299e-11	1.83986e-11	2.18564e-11
17.86	1.54993e-11	1.64463e-11		1.70753e-11	1.73188e-11	2.15398e-11	1.93051e-11	1.304e-11	1.78305e-11	2.40825e-11	1.78702e-11	3.81983e-11	1.72684e-11	2.19384e-11	1.90186e-11	1.86164e-11	2.08402e-11	1.84079e-11	2.18469e-11
17.88	1.54971e-11	1.64585e-11		1.70722e-11	1.73099e-11	2.1533e-11	1.93085e-11	1.30474e-11	1.78305e-11	2.40877e-11	1.78773e-11	3.8193e-11	1.72688e-11	2.19501e-11	1.9011e-11	1.86149e-11	2.08351e-11	1.84079e-11	2.18484e-11
17.9	1.54922e-11	1.64473e-11		1.70738e-11	1.73147e-11	2.15434e-11	1.92883e-11	1.30428e-11	1.78369e-11	2.40851e-11	1.78802e-11	3.81863e-11	1.72664e-11	2.19491e-11	1.90052e-11	1.86202e-11	2.08265e-11	1.84067e-11	2.18616e-11
17.92	1.55031e-11	1.64527e-11		1.70762e-11	1.73146e-11	2.1533e-11	1.92928e-11	1.30456e-11	1.78354e-11	2.40908e-11	1.78788e-11	3.819e-11	1.72671e-11	2.19487e-11	1.89983e-11	1.86183e-11	2.08271e-11	1.84022e-11	2.18521e-11
17.94	1.55008e-11	1.64546e-11		1.70852e-11	1.73108e-11	2.1536e-11	1.92912e-11	1.30405e-11	1.7839e-11	2.40823e-11	1.78759e-11	3.81912e-11	1.72602e-11	2.19498e-11	1.90029e-11	1.86127e-11	2.08331e-11	1.84065e-11	2.18591e-11
17.96	1.54991e-11	1.64473e-11		1.70793e-11	1.73142e-11	2.15413e-11	1.93081e-11	1.30431e-11	1.78392e-11	2.40877e-11	1.78813e-11	3.81915e-11	1.72825e-11	2.19479e-11	1.89993e-11	1.86162e-11	2.08346e-11	1.84025e-11	2.18596e-11
17.98	1.54936e-11	1.64562e-11		1.70844e-11	1.73155e-11	2.15402e-11	1.92903e-11	1.3038e-11	1.78458e-11	2.4079e-11	1.7884e-11	3.81943e-11	1.72751e-11	2.19513e-11	1.90069e-11	1.86207e-11	2.0827e-11	1.84055e-11	2.18532e-11
18	1.55008e-11	1.64438e-11		1.70833e-11	1.73142e-11	2.15381e-11	1.93003e-11	1.30481e-11	1.78418e-11	2.40809e-11	1.78812e-11	3.81959e-11	1.72806e-11	2.19487e-11	1.90065e-11	1.86197e-11	2.08339e-11	1.84068e-11	2.18531e-11
18.02	1.54989e-11	1.64433e-11		1.70821e-11	1.73151e-11	2.15372e-11	1.92855e-11	1.30436e-11	1.78452e-11	2.40848e-11	1.78708e-11	3.81927e-11	1.7275e-11	2.19442e-11	1.90042e-11	1.86162e-11	2.08231e-11	1.84086e-11	2.18529e-11
18.04	1.55042e-11	1.64452e-11		1.70795e-11	1.7316e-11		1.92978e-11	1.30401e-11	1.78457e-11	2.40833e-11	1.78812e-11	3.81942e-11	1.72689e-11	2.19477e-11	1.89997e-11	1.86248e-11	2.08425e-11	1.84109e-11	2.18511e-11
18.06	1.54912e-11	1.64435e-11		1.70876e-11	1.73099e-11		1.93088e-11	1.30427e-11	1.78479e-11	2.40874e-11	1.788e-11	3.81922e-11	1.72728e-11	2.19553e-11	1.89955e-11	1.86196e-11	2.08295e-11	1.84036e-11	2.18594e-11
18.08	1.54869e-11	1.64363e-11		1.70852e-11	1.73106e-11		1.9294e-11	1.30396e-11	1.78439e-11	2.40851e-11	1.78755e-11	3.81875e-11	1.72761e-11	2.19485e-11	1.9009e-11	1.8617e-11	2.08363e-11	1.84039e-11	2.18545e-11
18.1	1.54852e-11	1.63839e-11		1.70831e-11	1.73193e-11		1.93089e-11	1.30416e-11	1.7845e-11	2.40822e-11	1.78765e-11	3.8183e-11	1.72605e-11	2.19499e-11	1.9001e-11	1.86163e-11	2.08334e-11	1.84029e-11	2.18558e-11
18.12	1.54843e-11	1.63945e-11		1.70863e-11	1.73101e-11		1.92886e-11	1.30437e-11	1.78514e-11	2.40785e-11	1.78747e-11	3.81922e-11	1.72614e-11	2.1943e-11	1.90027e-11	1.86163e-11	2.08315e-11	1.84067e-11	2.18574e-11
18.14	1.54909e-11	1.63794e-11		1.70919e-11	1.73135e-11		1.93189e-11	1.30431e-11	1.78512e-11	2.4085e-11	1.78797e-11	3.81898e-11	1.72633e-11	2.19577e-11	1.89974e-11	1.86163e-11	2.08397e-11	1.84053e-11	2.18575e-11
18.16	1.54966e-11	1.63757e-11		1.70889e-11	1.7312e-11		1.93033e-11	1.30453e-11	1.78568e-11	2.40884e-11	1.78747e-11	3.82011e-11	1.72635e-11	2.19587e-11	1.90038e-11	1.86161e-11	2.08368e-11	1.84075e-11	2.18551e-11
18.18	1.54859e-11	1.63735e-11		1.70895e-11	1.73148e-11		1.92763e-11	1.30453e-11	1.78563e-11	2.40856e-11	1.78742e-11	3.81861e-11	1.72754e-11	2.19446e-11	1.89937e-11	1.86176e-11	2.08423e-11	1.83984e-11	2.18564e-11
18.2	1.54896e-11	1.63723e-11		1.70959e-11	1.73136e-11		1.93079e-11	1.30445e-11	1.78517e-11	2.40975e-11	1.78766e-11	3.8185e-11	1.72796e-11	2.19479e-11	1.89946e-11	1.86208e-11	2.08343e-11	1.84072e-11	2.18658e-11
18.22	1.5488e-11	1.6375e-11		1.70937e-11	1.73169e-11		1.93124e-11	1.30458e-11	1.7865e-11	2.40811e-11	1.78741e-11	3.81889e-11	1.72837e-11	2.1945e-11	1.89971e-11	1.86182e-11	2.08341e-11	1.84024e-11	2.18578e-11
18.24	1.54847e-11	1.63769e-11		1.70966e-11	1.73193e-11		1.93246e-11	1.30467e-11	1.78659e-11	2.40864e-11	1.788e-11	3.81879e-11	1.72704e-11	2.1945e-11	1.89921e-11	1.86207e-11	2.08331e-11	1.84118e-11	2.18565e-11
18.26	1.54735e-11	1.63662e-11		1.70939e-11	1.73202e-11		1.93257e-11	1.30468e-11	1.78675e-11	2.40863e-11	1.78722e-11	3.81845e-11	1.72606e-11	2.19527e-11	1.89986e-11	1.86187e-11	2.08379e-11	1.8407e-11	2.18546e-11
18.28	1.54915e-11	1.63693e-11		1.70993e-11	1.73186e-11		1.93306e-11	1.30489e-11	1.78658e-11	2.40866e-11	1.78742e-11	3.819e-11	1.72558e-11	2.19447e-11	1.89999e-11	1.86201e-11	2.08347e-11	1.84056e-11	2.18539e-11
18.3	1.54937e-11	1.63747e-11		1.70984e-11	1.73191e-11		1.93044e-11	1.30546e-11	1.78667e-11	2.40875e-11	1.78787e-11	3.81767e-11	1.72669e-11	2.19544e-11	1.89989e-11	1.86224e-11	2.08324e-11	1.84116e-11	2.18536e-11
18.32	1.54969e-11	1.63688e-11		1.71019e-11	1.73192e-11		1.92813e-11	1.3057e-11	1.78701e-11	2.40866e-11	1.78769e-11	3.81924e-11	1.72664e-11	2.19454e-11	1.90002e-11	1.86189e-11	2.08325e-11	1.84018e-11	2.18586e-11
18.34	1.54874e-11	1.63682e-11		1.71004e-11	1.73128e-11		1.92723e-11	1.30553e-11	1.78753e-11	2.40906e-11	1.78781e-11	3.81941e-11	1.72718e-11	2.19512e-11	1.89934e-11	1.86244e-11	2.08432e-11	1.84e-11	2.1856e-11
18.36	1.54967e-11	1.63737e-11		1.70985e-11	1.73145e-11		1.92914e-11	1.30646e-11	1.78705e-11	2.40837e-11	1.78753e-11	3.8189e-11	1.7275e-11	2.19431e-11	1.89958e-11	1.86184e-11	2.08385e-11	1.84048e-11	2.18578e-11
18.38	1.54925e-11	1.637e-11		1.71065e-11	1.73076e-11		1.92828e-11	1.30648e-11	1.78758e-11	2.40852e-11	1.78793e-11	3.81835e-11	1.72804e-11	2.19472e-11	1.89965e-11	1.86158e-11	2.08341e-11	1.84123e-11	2.18654e-11
18.4	1.54938e-11	1.63689e-11		1.70975e-11	1.73161e-11		1.92804e-11	1.30716e-11	1.78758e-11	2.40861e-11	1.78769e-11	3.8179e-11	1.72811e-11	2.19531e-11	1.89963e-11	1.86149e-11	2.08365e-11	1.84095e-11	2.1855e-11
18.42	1.54955e-11	1.63719e-11		1.71027e-11	1.73156e-11		1.93242e-11	1.30743e-11	1.78762e-11	2.40907e-11	1.78771e-11	3.81894e-11	1.72671e-11	2.19471e-11	1.89934e-11	1.86152e-11	2.08391e-11	1.84049e-11	2.18524e-11
18.44	1.54935e-11	1.63774e-11		1.71005e-11	1.73116e-11		1.93457e-11	1.30849e-11	1.7878e-11	2.4084e-11	1.78773e-11	3.81847e-11	1.7274e-11	2.19534e-11	1.89935e-11	1.86175e-11	2.08316e-11	1.84065e-11	2.18566e-11
18.46	1.54896e-11	1.63732e-11		1.71067e-11	1.73183e-11		1.93454e-11	1.30896e-11	1.78784e-11	2.40778e-11	1.78824e-11	3.81804e-11	1.72653e-11	2.19494e-11	1.89919e-11	1.86152e-11	2.0838e-11	1.84096e-11	2.18495e-11
18.48	1.54941e-11	1.63691e-11		1.71017e-11	1.73133e-11		1.93595e-11	1.3095e-11	1.78787e-11	2.40867e-11	1.78806e-11	3.81955e-11	1.72754e-11	2.19498e-11	1.89847e-11	1.8618e-11	2.08308e-11	1.84047e-11	2.18565e-11
18.5	1.55041e-11	1.63668e-11		1.71046e-11	1.73131e-11		1.9362e-11	1.30963e-11	1.78843e-11	2.40922e-11	1.78753e-11	3.81912e-11	1.72811e-11	2.19514e-11	1.89958e-11	1.86164e-11	2.08364e-11	1.8404e-11	2.18571e-11
18.52	1.54973e-11	1.63745e-11		1.71071e-11	1.73153e-11		1.93899e-11	1.3105e-11	1.78858e-11	2.40913e-11	1.7871e-11	3.81875e-11	1.72664e-11	2.19502e-11	1.89983e-11	1.86157e-11	2.08308e-11	1.84066e-11	2.18618e-11
18.54	1.55074e-11	1.63675e-11		1.71121e-11	1.73148e-11		1.94059e-11	1.31144e-11	1.7884e-11	2.40908e-11	1.78789e-11	3.81974e-11	1.72541e-11	2.19515e-11	1.89911e-11	1.86194e-11	2.08365e-11	1.84017e-11	2.18635e-11
18.56	1.55023e-11	1.63676e-11		1.7109e-11	1.73157e-11		1.9406e-11	1.31177e-11	1.789e-11	2.40926e-11	1.78738e-11	3.81852e-11	1.72683e-11	2.19479e-11	1.89981e-11	1.86176e-11	2.0838e-11	1.84033e-11	2.18545e-11
18.58	1.54973e-11	1.63711e-11		1.71128e-11	1.73167e-11		1.94126e-11	1.31202e-11	1.78958e-11	2.40942e-11	1.78813e-11	3.81911e-11	1.72567e-11	2.19498e-11	1.89866e-11	1.86223e-11	2.08416e-11	1.84121e-11	2.18609e-11
18.6	1.55002e-11	1.63804e-11		1.71111e-11	1.7312e-11		1.94316e-11	1.31269e-11	1.78938e-11	2.40904e-11	1.78807e-11	3.81875e-11	1.72607e-11	2.1949e-11	1.89908e-11	1.86178e-11	2.08361e-11	1.84084e-11	2.18609e-11
18.62	1.54954e-11	1.6369e-11		1.71148e-11	1.73205e-11		1.94182e-11	1.3137e-11	1.78959e-11	2.40909e-11	1.7877e-11	3.81906e-11	1.72708e-11	2.1946e-11	1.89981e-11	1.86137e-11	2.08308e-11	1.84011e-11	2.18582e-11
18.64	1.55032e-11	1.63718e-11		1.71078e-11	1.73181e-11		1.94226e-11	1.31317e-11	1.79025e-11	2.40931e-11	1.78778e-11	3.81791e-11	1.72614e-11	2.19527e-11	1.89938e-11	1.86191e-11	2.08361e-11	1.84051e-11	2.18543e-11
18.66	1.54973e-11	1.63731e-11		1.71081e-11	1.73167e-11		1.9429e-11	1.31399e-11	1.79017e-11	2.40887e-11	1.78785e-11	3.81905e-11	1.72616e-11	2.19486e-11	1.89972e-11	1.86188e-11	2.08398e-11	1.83998e-11	2.18535e-11
18.68	1.54862e-11	1.6369e-11		1.71137e-11	1.73149e-11		1.94308e-11	1.31405e-11	1.79004e-11	2.40933e-11	1.78771e-11	3.81923e-11	1.72633e-11	2.19561e-11	1.89953e-11	1.86153e-11	2.08393e-11	1.84071e-11	2.18617e-11
18.7	1.54838e-11	1.63637e-11		1.71209e-11	1.73151e-11		1.94248e-11	1.31465e-11	1.79049e-11	2.40912e-11	1.78737e-11	3.81928e-11	1.72586e-11	2.19517e-11	1.89794e-11	1.86141e-11	2.08385e-11	1.84029e-11	2.18612e-11
18.72	1.54935e-11	1.63722e-11		1.7116e-11	1.73165e-11		1.94173e-11	1.315e-11	1.78981e-11	2.4091e-11	1.78782e-11	3.81944e-11	1.72678e-11	2.19512e-11	1.89943e-11	1.86148e-11	2.0839e-11	1.8399e-11	2.18557e-11
18.74	1.54883e-11	1.63648e-11		1.71191e-11	1.73145e-11		1.94411e-11	1.31549e-11	1.79067e-11	2.40904e-11	1.78826e-11	3.81835e-11	1.7262e-11	2.1951e-11	1.89918e-11	1.86169e-11	2.08368e-11	1.84116e-11	2.18622e-11
18.76	1.54966e-11	1.6363e-11		1.7118e-11	1.7323e-11		1.94553e-11	1.31546e-11	1.7911e-11	2.41012e-11	1.78743e-11	3.81881e-11	1.72705e-11	2.19425e-11	1.89857e-11	1.86204e-11	2.08364e-11	1.8401e-11	2.18561e-11
18.78	1.54917e-11	1.63608e-11		1.71181e-11	1.73141e-11		1.94688e-11	1.31526e-11	1.79046e-11	2.40956e-11	1.78803e-11	3.81902e-11	1.7269e-11	2.19542e-11	1.89957e-11	1.86205e-11	2.08385e-11	1.84146e-11	2.18518e-11
18.8	1.54946e-11	1.6368e-11		1.7118e-11	1.73147e-11		1.94665e-11	1.31521e-11	1.79056e-11	2.40973e-11	1.78759e-11	3.81965e-11	1.72731e-11	2.19479e-11	1.89895e-11	1.86165e-11	2.08304e-11	1.84023e-11	2.18587e-11
18.82	1.5496e-11	1.63645e-11		1.71217e-11	1.73167e-11		1.94406e-11	1.31597e-11	1.79123e-11	2.40997e-11	1.78761e-11	3.81878e-11	1.72798e-11	2.19469e-11	1.89841e-11	1.86243e-11	2.08301e-11	1.84046e-11	2.18555e-11
18.84	1.54932e-11	1.63694e-11		1.71182e-11	1.73204e-11		1.94568e-11	1.31592e-11	1.79175e-11	2.40932e-11	1.78779e-11	3.81938e-11	1.7275e-11	2.195e-11	1.899e-11	1.86139e-11	2.08362e-11	1.84055e-11	2.18643e-11
18.86	1.54969e-11	1.63676e-11		1.71223e-11	1.73096e-11		1.94783e-11	1.3162e-11	1.79077e-11	2.40965e-11	1.78789e-11	3.81952e-11	1.72781e-11	2.195e-11	1.89918e-11	1.86189e-11	2.0838e-11	1.84073e-11	2.18651e-11
18.88	1.54884e-11	1.638e-11		1.71197e-11	1.73163e-11		1.94605e-11	1.31618e-11	1.79187e-11	2.41031e-11	1.78767e-11	3.81979e-11	1.72711e-11	2.19491e-11	1.89872e-11	1.86208e-11	2.08356e-11	1.8409e-11	2.18555e-11
18.9	1.55019e-11	1.63662e-11		1.71245e-11	1.73146e-11		1.94831e-11	1.31616e-11	1.79229e-11	2.40994e-11	1.78776e-11	3.81861e-11	1.72607e-11	2.19584e-11	1.89942e-11	1.86209e-11	2.0835e-11	1.8405e-11	2.18576e-11
18.92	1.54962e-11	1.63724e-11		1.71244e-11	1.73141e-11		1.94513e-11	1.31666e-11	1.79268e-11	2.40966e-11	1.78751e-11	3.81961e-11	1.72474e-11	2.19448e-11	1.89955e-11	1.86161e-11	2.08353e-11	1.84042e-11	2.18612e-11
18.94	1.54932e-11	1.63672e-11		1.71223e-11	1.73117e-11		1.94476e-11	1.31642e-11	1.79211e-11	2.40993e-11	1.78764e-11	3.81951e-11	1.72616e-11	2.19438e-11	1.89927e-11	1.86207e-11	2.0836e-11	1.84042e-11	2.18564e-11
18.96	1.54972e-11	1.63595e-11		1.71248e-11	1.73203e-11		1.94481e-11	1.31724e-11	1.79281e-11	2.41038e-11	1.78797e-11	3.81969e-11	1.72722e-11	2.19579e-11	1.89863e-11	1.86169e-11	2.08365e-11	1.84048e-11	2.18603e-11
18.98	1.55018e-11	1.63658e-11		1.71256e-11	1.73163e-11		1.9472e-11	1.31723e-11	1.79276e-11	2.41012e-11	1.7871e-11	3.81917e-11	1.72721e-11	2.19546e-11	1.89953e-11	1.86192e-11	2.08376e-11	1.84041e-11	2.18555e-11
19	1.54921e-11	1.63663e-11		1.71264e-11	1.73206e-11		1.9474e-11	1.3173e-11	1.79271e-11	2.40954e-11	1.7878e-11	3.8194e-11	1.72786e-11	2.19516e-11	1.89929e-11	1.86228e-11	2.08376e-11	1.83956e-11	2.18665e-11
19.02	1.54984e-11	1.63686e-11		1.71256e-11	1.73239e-11		1.94552e-11	1.31724e-11	1.79333e-11	2.40998e-11	1.78762e-11	3.82002e-11	1.72726e-11	2.19549e-11	1.89954e-11	1.86142e-11	2.08396e-11	1.84096e-11	2.18624e-11
19.04	1.54924e-11	1.6369e-11		1.71263e-11	1.73197e-11		1.94767e-11	1.3168e-11	1.79324e-11	2.40955e-11	1.78732e-11	3.81907e-11	1.72718e-11	2.19511e-11	1.89983e-11	1.86165e-11	2.0836e-11	1.84131e-11	2.18663e-11
19.06	1.54889e-11	1.63678e-11		1.7133e-11	1.73152e-11		1.94652e-11	1.31703e-11	1.79297e-11	2.40946e-11	1.78816e-11	3.81956e-11	1.72717e-11	2.19534e-11	1.89865e-11	1.86121e-11	2.08317e-11	1.84102e-11	2.18573e-11
19.08	1.548e-11	1.63689e-11		1.71245e-11	1.73148e-11		1.94554e-11	1.31811e-11	1.79292e-11	2.40941e-11	1.7882e-11	3.81933e-11	1.72749e-11	2.19463e-11	1.89883e-11	1.86167e-11	2.08354e-11	1.841e-11	2.18652e-11
19.1	1.54773e-11	1.63702e-11		1.71306e-11	1.73219e-11		1.94619e-11	1.31755e-11	1.79324e-11	2.40963e-11	1.78722e-11	3.81883e-11	1.72869e-11	2.19458e-11	1.8991e-11	1.86129e-11	2.08377e-11	1.84046e-11	2.18583e-11
19.12	1.54877e-11	1.63809e-11		1.71304e-11	1.73163e-11		1.94673e-11	1.31752e-11	1.79379e-11	2.4098e-11	1.78761e-11	3.81836e-11	1.7288e-11	2.19472e-11	1.89918e-11	1.86211e-11	2.08355e-11	1.84046e-11	2.18529e-11
19.14	1.54825e-11	1.63739e-11		1.71291e-11	1.73194e-11		1.94756e-11	1.31803e-11	1.79362e-11	2.40956e-11	1.78802e-11	3.81941e-11	1.72688e-11	2.19483e-11	1.89902e-11	1.86225e-11	2.08334e-11	1.84027e-11	2.18573e-11
19.16	1.54827e-11	1.63735e-11		1.71323e-11	1.73222e-11		1.94777e-11	1.31766e-11	1.79422e-11	2.41025e-11	1.78694e-11	3.8193e-11	1.72765e-11	2.19496e-11	1.89892e-11	1.86149e-11	2.08305e-11	1.84013e-11	2.18657e-11
19.18	1.54806e-11	1.63728e-11		1.71315e-11	1.73216e-11		1.94811e-11	1.31812e-11	1.79363e-11	2.41006e-11	1.78756e-11	3.8193e-11	1.72484e-11	2.19483e-11	1.89878e-11	1.86204e-11	2.08309e-11	1.8403e-11	2.18577e-11
19.2	1.54829e-11	1.63745e-11		1.71323e-11	1.73212e-11		1.94394e-11	1.31744e-11	1.79418e-11	2.40973e-11	1.78796e-11	3.8194e-11	1.72414e-11	2.19437e-11	1.89885e-11	1.86173e-11	2.08239e-11	1.84077e-11	2.18604e-11
19.22	1.54827e-11	1.63798e-11		1.71311e-11	1.7315e-11		1.94567e-11	1.31691e-11	1.79407e-11	2.40973e-11	1.78706e-11	3.81922e-11	1.72517e-11	2.19501e-11	1.89919e-11	1.86171e-11	2.0843e-11	1.84055e-11	2.18597e-11
19.24	1.54831e-11	1.6385e-11		1.71337e-11	1.73207e-11		1.94766e-11	1.31694e-11	1.79443e-11	2.4099e-11	1.78804e-11	3.81879e-11	1.72895e-11	2.19522e-11	1.89914e-11	1.8616e-11	2.0849e-11	1.8403e-11	2.18666e-11
19.26	1.54804e-11	1.63824e-11		1.71326e-11	1.73204e-11		1.9482e-11	1.31736e-11	1.79402e-11	2.40971e-11	1.78768e-11	3.81918e-11	1.72871e-11	2.1949e-11	1.89842e-11	1.86182e-11	2.08356e-11	1.84024e-11	2.18607e-11
19.28	1.54664e-11	1.6372e-11		1.71347e-11	1.73276e-11		1.94681e-11	1.31701e-11	1.79544e-11	2.40935e-11	1.78788e-11	3.81854e-11	1.72692e-11	2.19532e-11	1.89885e-11	1.86172e-11	2.08366e-11	1.84011e-11	2.18667e-11
19.3	1.54824e-11	1.63788e-11		1.71368e-11	1.732e-11		1.94615e-11	1.31733e-11	1.79471e-11	2.40964e-11	1.78785e-11	3.8186e-11	1.72881e-11	2.19538e-11	1.89792e-11	1.86145e-11	2.08327e-11	1.84005e-11	2.18597e-11
19.32	1.54926e-11	1.63693e-11		1.714e-11	1.73196e-11		1.94696e-11	1.3172e-11	1.79453e-11	2.40976e-11	1.78749e-11	3.81988e-11	1.72906e-11	2.19458e-11	1.89914e-11	1.86168e-11	2.08356e-11	1.84115e-11	2.18537e-11
19.34	1.54885e-11	1.63668e-11		1.71352e-11	1.73239e-11		1.94988e-11	1.31734e-11	1.79502e-11	2.40973e-11	1.78804e-11	3.81877e-11	1.72572e-11	2.19504e-11	1.89924e-11	1.8617e-11	2.08388e-11	1.84e-11	2.18692e-11
19.36	1.5494e-11	1.63813e-11		1.71382e-11	1.73231e-11		1.94795e-11	1.31688e-11	1.7945e-11	2.41007e-11	1.78838e-11	3.81987e-11	1.72726e-11	2.19506e-11	1.89871e-11	1.86192e-11	2.08338e-11	1.84054e-11	2.18601e-11
19.38	1.54861e-11	1.63847e-11		1.71349e-11	1.73171e-11		1.94631e-11	1.31674e-11	1.79559e-11	2.40987e-11	1.7877e-11	3.81877e-11	1.72621e-11	2.19506e-11	1.89923e-11	1.86146e-11	2.08288e-11	1.84059e-11	2.18634e-11
19.4	1.54836e-11	1.63782e-11		1.71355e-11	1.73196e-11		1.9501e-11	1.31712e-11	1.79546e-11	2.4098e-11	1.78805e-11	3.81855e-11	1.7276e-11	2.19514e-11	1.89936e-11	1.86181e-11	2.08291e-11	1.84069e-11	2.18635e-11
19.42	1.5485e-11	1.63809e-11		1.7135e-11	1.73123e-11		1.94709e-11	1.31651e-11	1.79594e-11	2.40913e-11	1.78795e-11	3.81941e-11	1.7293e-11	2.19495e-11	1.89907e-11	1.8616e-11	2.08303e-11	1.84092e-11	2.18657e-11
19.44	1.5478e-11	1.63839e-11		1.71353e-11	1.73205e-11		1.94716e-11	1.31665e-11	1.79563e-11	2.40889e-11	1.78776e-11	3.8186e-11	1.72725e-11	2.19518e-11	1.89965e-11	1.86189e-11	2.08412e-11	1.84073e-11	2.18626e-11
19.46	1.54764e-11	1.63737e-11		1.71398e-11	1.73204e-11		1.94338e-11	1.31706e-11	1.7953e-11	2.4087e-11	1.78852e-11	3.81931e-11	1.72678e-11	2.19517e-11	1.89951e-11	1.8615e-11	2.08303e-11	1.84021e-11	2.18642e-11
19.48	1.54831e-11	1.63776e-11		1.71421e-11	1.73205e-11		1.94716e-11	1.31674e-11	1.79575e-11	2.40898e-11	1.78819e-11	3.81915e-11	1.72719e-11	2.19488e-11	1.89984e-11	1.86113e-11	2.08271e-11	1.84068e-11	2.18685e-11
19.5	1.54798e-11	1.63717e-11		1.71485e-11	1.73257e-11		1.94654e-11	1.31728e-11	1.79612e-11	2.4089e-11	1.78787e-11	3.8192e-11	1.727e-11	2.1951e-11	1.89935e-11	1.86178e-11	2.08333e-11	1.84066e-11	2.18683e-11
19.52	1.54857e-11	1.63759e-11		1.71462e-11	1.73182e-11		1.94888e-11	1.31685e-11	1.79588e-11	2.40957e-11	1.78743e-11	3.81995e-11	1.72953e-11	2.19471e-11	1.89911e-11	1.86135e-11	2.0836e-11	1.84075e-11	2.18624e-11
19.54	1.54796e-11	1.63701e-11		1.71435e-11	1.7318e-11		1.94791e-11	1.31686e-11	1.79649e-11	2.4092e-11	1.78816e-11	3.81887e-11	1.7287e-11	2.19527e-11	1.89935e-11	1.86171e-11	2.0831e-11	1.84063e-11	2.18641e-11
19.56	1.54883e-11	1.63734e-11		1.71448e-11	1.73194e-11		1.94598e-11	1.31623e-11	1.79658e-11	2.40924e-11	1.78756e-11	3.81923e-11	1.73029e-11	2.19455e-11	1.89918e-11	1.86158e-11	2.08298e-11	1.84072e-11	2.18593e-11
19.58	1.54833e-11	1.63717e-11		1.71471e-11	1.73208e-11		1.94723e-11	1.31671e-11	1.79622e-11	2.40899e-11	1.78817e-11	3.81921e-11	1.72823e-11	2.19458e-11	1.89981e-11	1.86144e-11	2.08314e-11	1.84061e-11	2.18672e-11
19.6	1.54916e-11	1.63738e-11		1.7144e-11	1.73211e-11		1.94862e-11	1.31645e-11	1.79602e-11	2.40888e-11	1.78742e-11	3.81878e-11	1.72807e-11	2.19523e-11	1.89914e-11	1.86204e-11	2.08296e-11	1.84077e-11	2.1865e-11
19.62	1.54813e-11	1.63687e-11		1.71452e-11	1.73183e-11		1.94385e-11	1.31562e-11	1.79603e-11	2.40959e-11	1.78764e-11	3.81835e-11	1.72897e-11	2.19485e-11	1.89938e-11	1.86162e-11	2.08375e-11	1.84027e-11	2.18641e-11
19.64	1.54934e-11	1.63714e-11		1.71416e-11	1.7318e-11		1.94655e-11	1.31568e-11	1.79591e-11	2.40949e-11	1.78812e-11	3.81909e-11	1.72881e-11	2.19508e-11	1.89921e-11	1.86141e-11	2.08296e-11	1.84086e-11	2.18535e-11
19.66	1.54867e-11	1.63753e-11		1.71487e-11	1.73205e-11		1.94662e-11	1.31598e-11	1.79648e-11	2.40926e-11	1.78752e-11	3.81874e-11	1.72826e-11	2.19519e-11	1.89872e-11	1.86149e-11	2.0832e-11	1.84029e-11	2.18594e-11
19.68	1.54877e-11	1.63727e-11		1.71441e-11	1.7326e-11		1.94585e-11	1.31591e-11	1.79704e-11	2.4099e-11	1.78782e-11	3.81956e-11	1.72873e-11	2.19516e-11	1.89806e-11	1.86148e-11	2.08451e-11	1.84025e-11	2.18697e-11
19.7	1.54905e-11	1.63697e-11		1.71462e-11	1.73235e-11		1.94716e-11	1.31586e-11	1.79762e-11	2.41002e-11	1.78783e-11	3.81899e-11	1.72873e-11	2.19481e-11	1.89936e-11	1.86083e-11	2.08398e-11	1.84063e-11	2.18659e-11
19.72	1.55007e-11	1.6375e-11		1.71472e-11	1.73222e-11		1.94788e-11	1.31579e-11	1.79725e-11	2.40936e-11	1.78795e-11	3.81823e-11	1.72771e-11	2.19517e-11	1.89936e-11	1.86188e-11	2.0842e-11	1.84053e-11	2.18596e-11
19.74	1.55013e-11	1.63727e-11		1.71472e-11	1.73196e-11		1.95014e-11	1.3159e-11	1.79769e-11	2.40938e-11	1.78745e-11	3.81997e-11	1.72839e-11	2.19524e-11	1.89954e-11	1.86186e-11	2.08342e-11	1.84063e-11	2.18637e-11
19.76	1.54822e-11	1.63767e-11		1.71479e-11	1.73204e-11		1.94849e-11	1.3161e-11	1.79772e-11	2.40898e-11	1.78849e-11	3.81897e-11	1.72643e-11	2.19531e-11	1.89927e-11	1.86109e-11	2.08251e-11	1.83994e-11	2.18669e-11
19.78	1.55015e-11	1.63698e-11		1.71479e-11	1.73201e-11		1.95115e-11	1.31567e-11	1.79779e-11	2.40886e-11	1.78806e-11	3.81922e-11	1.72534e-11	2.19471e-11	1.89931e-11	1.8613e-11	2.08298e-11	1.84053e-11	2.18532e-11
19.8	1.54823e-11	1.63652e-11		1.71485e-11	1.73184e-11		1.94627e-11	1.31586e-11	1.79751e-11	2.40887e-11	1.78804e-11	3.81898e-11	1.72701e-11	2.19531e-11	1.89934e-11	1.86148e-11	2.08254e-11	1.84069e-11	2.18649e-11
19.82	1.54876e-11	1.63789e-11		1.71512e-11	1.73252e-11		1.94699e-11	1.31582e-11	1.7979e-11	2.40939e-11	1.78783e-11	3.81888e-11	1.72551e-11	2.19514e-11	1.89935e-11	1.86137e-11	2.08267e-11	1.84033e-11	2.18616e-11
19.84	1.54942e-11	1.63767e-11		1.71524e-11	1.73157e-11		1.94701e-11	1.3155e-11	1.79745e-11	2.40928e-11	1.78778e-11	3.81901e-11	1.72592e-11	2.19469e-11	1.89888e-11	1.86101e-11	2.08276e-11	1.83993e-11	2.18639e-11
19.86	1.54932e-11	1.63696e-11		1.71517e-11	1.73183e-11		1.94875e-11	1.31572e-11	1.79872e-11	2.40893e-11	1.7872e-11	3.81995e-11	1.72797e-11	2.19557e-11	1.89947e-11	1.86145e-11	2.08375e-11	1.841e-11	2.18654e-11
19.88	1.54845e-11	1.63737e-11		1.71537e-11	1.73195e-11		1.9515e-11	1.31561e-11	1.79851e-11	2.40925e-11	1.78778e-11	3.81902e-11	1.72624e-11	2.19474e-11	1.89876e-11	1.86125e-11	2.08327e-11	1.84066e-11	2.18601e-11
19.9	1.54808e-11	1.63676e-11		1.71548e-11	1.73229e-11		1.94931e-11	1.31503e-11	1.79801e-11	2.40987e-11	1.78814e-11	3.81983e-11	1.72489e-11	2.19571e-11	1.89892e-11	1.86152e-11	2.08357e-11	1.84115e-11	2.18638e-11
19.92	1.54952e-11	1.63641e-11		1.71528e-11	1.73209e-11		1.9476e-11	1.31532e-11	1.79809e-11	2.40881e-11	1.78793e-11	3.81936e-11	1.72574e-11	2.19467e-11	1.89923e-11	1.86082e-11	2.08325e-11	1.8408e-11	2.1862e-11
19.94	1.55075e-11	1.63756e-11		1.71536e-11	1.73175e-11		1.94838e-11	1.31507e-11	1.79854e-11	2.40845e-11	1.78814e-11	3.81976e-11	1.72635e-11	2.19516e-11	1.89828e-11	1.86053e-11	2.08377e-11	1.84026e-11	2.18633e-11
19.96	1.55084e-11	1.63658e-11		1.71533e-11	1.73211e-11		1.9492e-11	1.31539e-11	1.79807e-11	2.40886e-11	1.78713e-11	3.81909e-11	1.72789e-11	2.19547e-11	1.89931e-11	1.86081e-11	2.08338e-11	1.8403e-11	2.18622e-11
19.98	1.55065e-11	1.63699e-11		1.71552e-11	1.73228e-11		1.94869e-11	1.31547e-11	1.79882e-11	2.40857e-11	1.78737e-11	3.81956e-11	1.72575e-11	2.19557e-11	1.89874e-11	1.86065e-11	2.08414e-11	1.84079e-11	2.18577e-11
20	1.5498e-11	1.63646e-11		1.71556e-11	1.73205e-11		1.94862e-11	1.31527e-11	1.7988e-11	2.40908e-11	1.78688e-11	3.81808e-11	1.72494e-11	2.1954e-11	1.89897e-11	1.86123e-11	2.08371e-11	1.84071e-11	2.18622e-11
20.02	1.55193e-11	1.637e-11		1.71533e-11	1.73213e-11		1.95123e-11	1.31522e-11	1.79822e-11	2.40915e-11	1.78766e-11	3.81906e-11	1.72485e-11	2.1953e-11	1.8994e-11	1.8607e-11	2.08443e-11	1.84025e-11	2.18585e-11
20.04	1.55135e-11	1.63738e-11		1.71599e-11	1.73236e-11		1.95201e-11	1.31515e-11	1.7985e-11	2.40926e-11	1.7878e-11	3.82075e-11	1.72461e-11	2.19518e-11	1.89941e-11	1.8609e-11	2.08346e-11	1.84104e-11	2.18606e-11
20.06	1.55208e-11	1.6371e-11		1.71567e-11	1.73218e-11		1.95116e-11	1.31502e-11	1.79865e-11	2.40901e-11	1.7868e-11	3.81842e-11	1.72628e-11	2.19514e-11	1.89869e-11	1.86069e-11	2.08332e-11	1.84102e-11	2.1864e-11
20.08	1.55132e-11	1.6365e-11		1.71588e-11	1.73196e-11		1.95054e-11	1.31512e-11	1.79864e-11	2.40855e-11	1.78791e-11	3.81926e-11	1.72541e-11	2.19499e-11	1.89918e-11	1.86022e-11	2.08355e-11	1.84128e-11	2.18611e-11
20.1	1.55113e-11	1.63723e-11		1.71591e-11	1.73237e-11		1.95064e-11	1.31536e-11	1.79896e-11	2.40882e-11	1.78724e-11	3.81893e-11	1.72687e-11	2.19531e-11	1.90003e-11	1.86059e-11	2.0838e-11	1.84074e-11	2.18647e-11
20.12	1.55112e-11	1.63711e-11		1.71616e-11	1.73227e-11		1.9512e-11	1.31465e-11	1.79825e-11	2.40846e-11	1.78752e-11	3.81893e-11	1.72413e-11	2.19447e-11	1.89925e-11	1.86028e-11	2.08374e-11	1.84072e-11	2.18669e-11
20.14	1.55317e-11	1.63805e-11		1.71611e-11	1.7327e-11		1.95205e-11	1.31554e-11	1.79837e-11	2.40835e-11	1.78776e-11	3.81922e-11	1.72589e-11	2.19521e-11	1.8996e-11	1.86034e-11	2.08359e-11	1.84083e-11	2.18644e-11
20.16	1.55353e-11	1.63728e-11		1.71619e-11	1.73265e-11		1.94905e-11	1.315e-11	1.79868e-11	2.4083e-11	1.78755e-11	3.81918e-11	1.72635e-11	2.19486e-11	1.90037e-11	1.86023e-11	2.08314e-11	1.84014e-11	2.18663e-11
20.18	1.55203e-11	1.63633e-11		1.71601e-11	1.73245e-11		1.94745e-11	1.31517e-11	1.79937e-11	2.40921e-11	1.78775e-11	3.81978e-11	1.72629e-11	2.19553e-11	1.89936e-11	1.86004e-11	2.08433e-11	1.84102e-11	2.18597e-11
20.2	1.55216e-11	1.63566e-11		1.71548e-11	1.73267e-11		1.94824e-11	1.31543e-11	1.79929e-11	2.40945e-11	1.78731e-11	3.81939e-11	1.72762e-11	2.19522e-11	1.89957e-11	1.86041e-11	2.08397e-11	1.84128e-11	2.18617e-11
20.22	1.5523e-11	1.6354e-11		1.71664e-11	1.73217e-11		1.94803e-11	1.31435e-11	1.79889e-11	2.4094e-11	1.78776e-11	3.81902e-11	1.7266e-11	2.19502e-11	1.89923e-11	1.86038e-11	2.08329e-11	1.84185e-11	2.18652e-11
20.24	1.55323e-11	1.63499e-11		1.71603e-11	1.73212e-11		1.94767e-11	1.31519e-11	1.79873e-11	2.40934e-11	1.78788e-11	3.81891e-11	1.72498e-11	2.19543e-11	1.89986e-11	1.86053e-11	2.0838e-11	1.84034e-11	2.18701e-11
20.26	1.55282e-11	1.63573e-11		1.71647e-11	1.73238e-11		1.94732e-11	1.31455e-11	1.79957e-11	2.40894e-11	1.78812e-11	3.81908e-11	1.7246e-11	2.19563e-11	1.89952e-11	1.85996e-11	2.0836e-11	1.82319e-11	2.18651e-11
20.28	1.55262e-11	1.63584e-11		1.71606e-11	1.73236e-11		1.94663e-11	1.31455e-11	1.79966e-11	2.40986e-11	1.7879e-11	3.81895e-11	1.72588e-11	2.1949e-11	1.89921e-11	1.86004e-11	2.08327e-11	1.8132e-11	2.18589e-11
20.3	1.55295e-11	1.63567e-11		1.71672e-11	1.73237e-11		1.9482e-11	1.31471e-11	1.79968e-11	2.40934e-11	1.78798e-11	3.81995e-11	1.72397e-11	2.19541e-11	1.89957e-11	1.85969e-11	2.08358e-11	1.81163e-11	2.18661e-11
20.32	1.55218e-11	1.636e-11		1.71602e-11	1.73253e-11		1.95062e-11	1.31497e-11	1.80004e-11	2.40936e-11	1.78776e-11	3.81971e-11	1.72424e-11	2.19486e-11	1.89855e-11	1.8601e-11	2.08341e-11	1.8115e-11	2.18689e-11
20.34	1.55289e-11	1.6366e-11		1.71642e-11	1.73268e-11		1.94975e-11	1.31538e-11	1.79939e-11	2.40981e-11	1.78792e-11	3.81937e-11	1.72598e-11	2.19532e-11	1.89898e-11	1.85983e-11	2.08443e-11	1.81115e-11	2.1859e-11
20.36	1.5529e-11	1.63616e-11		1.71628e-11	1.73269e-11		1.95032e-11	1.31501e-11	1.80002e-11	2.40973e-11	1.78815e-11	3.81862e-11	1.72491e-11	2.19524e-11	1.89841e-11	1.86044e-11	2.08383e-11	1.81191e-11	2.1864e-11
20.38	1.55374e-11	1.63757e-11		1.71691e-11	1.73282e-11		1.94958e-11	1.315e-11	1.79965e-11	2.4094e-11	1.78812e-11	3.81916e-11	1.72532e-11	2.19514e-11	1.89857e-11	1.86018e-11	2.08383e-11	1.81359e-11	2.18654e-11
20.4	1.55434e-11	1.63669e-11		1.71606e-11	1.73224e-11		1.94979e-11	1.31513e-11	1.7995e-11	2.40929e-11	1.78696e-11	3.81954e-11	1.72426e-11	2.19523e-11	1.89872e-11	1.86084e-11	2.08285e-11	1.81436e-11	2.18634e-11
20.42	1.55466e-11	1.63592e-11		1.71662e-11	1.73265e-11		1.95056e-11	1.31513e-11	1.79996e-11	2.40941e-11	1.78728e-11	3.81924e-11	1.72458e-11	2.19528e-11	1.8988e-11	1.85976e-11	2.08321e-11	1.81503e-11	2.18628e-11
20.44	1.55347e-11	1.63706e-11		1.71613e-11	1.73258e-11		1.94989e-11	1.31544e-11	1.79993e-11	2.40986e-11	1.7879e-11	3.81947e-11	1.72571e-11	2.19542e-11	1.89836e-11	1.86043e-11	2.08365e-11	1.81427e-11	2.18676e-11
20.46	1.55409e-11	1.63676e-11		1.71628e-11	1.73217e-11		1.94989e-11	1.31582e-11	1.79955e-11	2.40989e-11	1.78735e-11	3.8191e-11	1.72464e-11	2.19523e-11	1.89926e-11	1.85948e-11	2.08409e-11	1.81401e-11	2.18668e-11
20.48	1.55435e-11	1.6374e-11		1.71671e-11	1.73248e-11		1.95263e-11	1.31541e-11	1.80032e-11	2.4096e-11	1.7877e-11	3.81887e-11	1.72611e-11	2.19518e-11	1.89885e-11	1.85982e-11	2.08334e-11	1.81352e-11	2.18608e-11
20.5	1.5545e-11	1.63776e-11		1.71625e-11	1.73235e-11		1.95239e-11	1.31542e-11	1.80042e-11	2.4095e-11	1.78799e-11	3.81891e-11	1.72642e-11	2.19579e-11	1.89912e-11	1.85998e-11	2.08272e-11	1.81374e-11	2.18659e-11
20.52	1.55413e-11	1.6385e-11		1.71662e-11	1.73233e-11		1.95301e-11	1.31507e-11	1.79966e-11	2.40936e-11	1.78815e-11	3.81854e-11	1.72574e-11	2.19506e-11	1.89896e-11	1.85997e-11	2.08292e-11	1.81278e-11	2.18601e-11
20.54	1.55497e-11	1.63805e-11		1.71698e-11	1.73231e-11		1.95004e-11	1.31509e-11	1.80029e-11	2.40973e-11	1.7876e-11	3.81989e-11	1.72573e-11	2.19555e-11	1.89905e-11	1.85962e-11	2.08384e-11	1.81298e-11	2.18599e-11
20.56	1.55527e-11	1.63824e-11		1.71638e-11	1.73257e-11		1.95209e-11	1.31539e-11	1.8002e-11	2.40974e-11	1.78777e-11	3.81911e-11	1.72459e-11	2.19585e-11	1.89835e-11	1.85907e-11	2.08389e-11	1.8123e-11	2.18684e-11
20.58	1.55663e-11	1.6383e-11		1.71697e-11	1.73264e-11		1.95468e-11	1.31532e-11	1.80007e-11	2.40923e-11	1.78772e-11	3.8195e-11	1.72577e-11	2.19516e-11	1.89909e-11	1.85945e-11	2.08389e-11	1.8121e-11	2.18589e-11
20.6	1.55615e-11	1.6394e-11		1.71693e-11	1.73257e-11		1.95217e-11	1.31538e-11	1.7999e-11	2.40979e-11	1.78727e-11	3.8188e-11	1.72462e-11	2.19479e-11	1.8989e-11	1.85919e-11	2.08407e-11	1.81219e-11	2.18662e-11
20.62	1.55679e-11	1.63868e-11		1.71677e-11	1.73269e-11		1.95149e-11	1.31572e-11	1.80002e-11	2.40983e-11	1.78726e-11	3.81899e-11	1.72508e-11	2.19557e-11	1.89851e-11	1.85928e-11	2.08333e-11	1.81195e-11	2.18656e-11
20.64	1.55728e-11	1.63916e-11		1.71624e-11	1.73278e-11		1.95028e-11	1.31534e-11	1.80085e-11	2.40954e-11	1.78794e-11	3.81979e-11	1.72479e-11	2.19544e-11	1.89833e-11	1.85934e-11	2.08437e-11	1.81163e-11	2.18658e-11
20.66	1.55669e-11	1.63962e-11		1.71704e-11	1.7328e-11		1.95358e-11	1.31532e-11	1.80098e-11	2.4095e-11	1.78781e-11	3.81962e-11	1.72641e-11	2.1956e-11	1.89847e-11	1.85975e-11	2.08369e-11	1.81191e-11	2.18695e-11
20.68	1.55737e-11	1.63932e-11		1.71652e-11	1.7325e-11		1.95536e-11	1.3159e-11	1.80028e-11	2.40987e-11	1.78811e-11	3.81927e-11	1.72468e-11	2.19542e-11	1.89958e-11	1.85883e-11	2.08374e-11	1.81122e-11	2.18631e-11
20.7	1.55857e-11	1.63899e-11		1.71718e-11	1.73221e-11		1.952e-11	1.31547e-11	1.80037e-11	2.40991e-11	1.7872e-11	3.81915e-11	1.72433e-11	2.1951e-11	1.89938e-11	1.85946e-11	2.08347e-11	1.81213e-11	2.18609e-11
20.72	1.55776e-11	1.63942e-11		1.71703e-11	1.73248e-11		1.95124e-11	1.31598e-11	1.8005e-11	2.40933e-11	1.78765e-11	3.81896e-11	1.72538e-11	2.19526e-11	1.89898e-11	1.85908e-11	2.08402e-11	1.81149e-11	2.1853e-11
20.74	1.55857e-11	1.63947e-11		1.71771e-11	1.73301e-11		1.95249e-11	1.31585e-11	1.8006e-11	2.4093e-11	1.78769e-11	3.81936e-11	1.72617e-11	2.19513e-11	1.89869e-11	1.859e-11	2.08256e-11	1.81152e-11	2.18632e-11
20.76	1.55882e-11	1.63983e-11		1.71742e-11	1.7323e-11		1.95042e-11	1.31578e-11	1.80085e-11	2.4093e-11	1.78816e-11	3.81914e-11	1.72523e-11	2.19558e-11	1.89902e-11	1.85892e-11	2.08387e-11	1.81118e-11	2.18627e-11
20.78	1.55813e-11	1.63948e-11		1.7174e-11	1.73279e-11		1.95301e-11	1.31573e-11	1.8009e-11	2.40958e-11	1.78797e-11	3.81965e-11	1.7262e-11	2.19501e-11	1.89918e-11	1.85932e-11	2.08394e-11	1.81126e-11	2.1856e-11
20.8	1.55827e-11	1.63989e-11		1.71734e-11	1.73286e-11		1.9514e-11	1.31613e-11	1.80079e-11	2.40939e-11	1.78749e-11	3.81917e-11	1.72545e-11	2.19548e-11	1.89952e-11	1.85923e-11	2.08382e-11	1.81133e-11	2.18602e-11
20.82	1.55822e-11	1.64014e-11		1.71795e-11	1.73283e-11		1.9526e-11	1.31604e-11	1.80157e-11	2.40942e-11	1.78718e-11	3.81976e-11	1.72664e-11	2.19483e-11	1.89922e-11	1.85929e-11	2.08321e-11	1.81095e-11	2.18639e-11
20.84	1.55913e-11	1.63969e-11		1.71796e-11	1.73296e-11		1.95225e-11	1.31605e-11	1.80055e-11	2.40952e-11	1.78731e-11	3.81998e-11	1.72609e-11	2.19501e-11	1.89885e-11	1.85909e-11	2.08423e-11	1.81095e-11	2.18545e-11
20.86	1.55952e-11	1.64007e-11		1.71821e-11	1.73248e-11		1.95097e-11	1.3158e-11	1.80142e-11	2.40943e-11	1.78778e-11	3.81911e-11	1.72695e-11	2.19485e-11	1.89912e-11	1.8597e-11	2.08374e-11	1.81091e-11	2.1867e-11
20.88	1.55963e-11	1.64001e-11		1.71761e-11	1.73229e-11		1.94685e-11	1.31635e-11	1.80143e-11	2.40904e-11	1.78755e-11	3.81931e-11	1.72822e-11	2.19468e-11	1.89959e-11	1.85917e-11	2.08356e-11	1.81063e-11	2.18601e-11
20.9	1.55808e-11	1.64016e-11		1.71757e-11	1.73263e-11		1.94884e-11	1.31584e-11	1.80073e-11	2.40904e-11	1.78731e-11	3.81885e-11	1.72649e-11	2.19559e-11	1.89942e-11	1.85926e-11	2.08299e-11	1.81099e-11	2.18571e-11
20.92	1.5599e-11	1.64042e-11		1.71785e-11	1.73257e-11		1.95158e-11	1.31628e-11	1.80072e-11	2.40945e-11	1.78825e-11	3.82019e-11	1.72666e-11	2.19509e-11	1.89936e-11	1.85927e-11	2.08433e-11	1.81023e-11	2.18651e-11
20.94	1.56045e-11	1.64106e-11		1.71771e-11	1.73242e-11		1.95023e-11	1.31609e-11	1.80139e-11	2.4101e-11	1.78779e-11	3.81888e-11	1.72694e-11	2.19516e-11	1.89929e-11	1.85936e-11	2.08313e-11	1.81098e-11	2.18658e-11
20.96	1.56037e-11	1.6415e-11		1.7178e-11	1.73247e-11		1.95385e-11	1.31605e-11	1.80134e-11	2.40972e-11	1.78739e-11	3.81867e-11	1.72768e-11	2.19517e-11	1.89891e-11	1.85969e-11	2.08289e-11	1.81024e-11	2.1866e-11
20.98	1.56051e-11	1.64151e-11		1.7171e-11	1.73261e-11		1.95131e-11	1.31626e-11	1.80113e-11	2.40936e-11	1.78851e-11	3.81911e-11	1.72501e-11	2.19457e-11	1.89906e-11	1.85923e-11	2.0834e-11	1.81064e-11	2.18657e-11
21	1.55976e-11	1.64168e-11		1.71705e-11	1.73202e-11		1.95327e-11	1.31646e-11	1.80138e-11	2.40993e-11	1.78786e-11	3.81896e-11	1.72777e-11	2.19574e-11	1.8984e-11	1.85902e-11	2.08289e-11	1.81138e-11	2.18583e-11
21.02	1.55936e-11	1.64172e-11		1.71762e-11	1.73259e-11		1.95228e-11	1.31639e-11	1.80086e-11	2.40942e-11	1.7879e-11	3.81943e-11	1.7262e-11	2.19505e-11	1.89923e-11	1.85958e-11	2.08385e-11	1.81066e-11	2.18615e-11
21.04	1.55987e-11	1.6425e-11		1.71818e-11	1.73211e-11		1.95035e-11	1.31662e-11	1.80115e-11	2.40966e-11	1.78808e-11	3.82019e-11	1.72592e-11	2.19555e-11	1.89938e-11	1.85927e-11	2.08258e-11	1.81104e-11	2.18652e-11
21.06	1.56015e-11	1.64159e-11		1.71729e-11	1.73239e-11		1.95102e-11	1.31622e-11	1.80129e-11	2.4094e-11	1.78743e-11	3.81983e-11	1.7249e-11	2.19499e-11	1.89938e-11	1.85963e-11	2.08307e-11	1.81028e-11	2.18641e-11
21.08	1.55971e-11	1.64122e-11		1.71809e-11	1.73315e-11		1.95136e-11	1.31693e-11	1.80186e-11	2.40922e-11	1.78718e-11	3.81889e-11	1.72621e-11	2.19568e-11	1.89833e-11	1.8588e-11	2.08447e-11	1.8106e-11	2.18625e-11
21.1	1.56055e-11	1.64141e-11		1.71748e-11	1.73375e-11		1.95509e-11	1.31681e-11	1.80149e-11	2.40924e-11	1.78708e-11	3.81905e-11	1.72493e-11	2.19496e-11	1.89906e-11	1.85943e-11	2.08277e-11	1.8104e-11	2.1865e-11
21.12	1.56027e-11	1.64208e-11		1.71778e-11	1.73284e-11		1.95229e-11	1.31665e-11	1.80174e-11	2.40998e-11	1.78741e-11	3.81899e-11	1.72706e-11	2.19513e-11	1.89965e-11	1.85946e-11	2.0837e-11	1.81043e-11	2.18604e-11
21.14	1.5607e-11	1.64155e-11		1.71805e-11	1.73286e-11		1.95209e-11	1.31673e-11	1.80173e-11	2.40967e-11	1.78732e-11	3.81898e-11	1.72766e-11	2.19546e-11	1.89889e-11	1.85993e-11	2.08297e-11	1.80949e-11	2.18636e-11
21.16	1.55995e-11	1.64248e-11		1.71761e-11	1.73213e-11		1.9541e-11	1.31697e-11	1.80176e-11	2.40955e-11	1.78719e-11	3.8187e-11	1.72808e-11	2.19485e-11	1.89928e-11	1.85936e-11	2.08371e-11	1.80982e-11	2.18673e-11
21.18	1.56066e-11	1.6429e-11		1.71796e-11	1.73285e-11		1.95391e-11	1.31686e-11	1.80192e-11	2.40971e-11	1.78739e-11	3.81928e-11	1.72588e-11	2.1952e-11	1.89903e-11	1.85844e-11	2.08404e-11	1.81101e-11	2.18655e-11
21.2	1.56106e-11	1.64229e-11		1.71799e-11	1.73275e-11		1.95301e-11	1.31658e-11	1.80149e-11	2.40983e-11	1.78726e-11	3.81911e-11	1.72714e-11	2.19562e-11	1.89963e-11	1.85932e-11	2.08347e-11	1.81072e-11	2.18629e-11
21.22	1.56123e-11	1.64154e-11		1.71791e-11	1.73254e-11		1.94913e-11	1.31694e-11	1.80164e-11	2.40906e-11	1.78771e-11	3.81986e-11	1.72644e-11	2.19569e-11	1.89935e-11	1.8591e-11	2.0831e-11	1.81018e-11	2.18602e-11
21.24	1.56033e-11	1.64202e-11		1.71798e-11	1.73249e-11		1.94907e-11	1.3169e-11	1.80182e-11	2.4096e-11	1.7876e-11	3.81909e-11	1.72707e-11	2.19484e-11	1.89911e-11	1.85891e-11	2.08388e-11	1.81022e-11	2.18625e-11
21.26	1.56127e-11	1.64249e-11		1.71735e-11	1.73265e-11		1.95324e-11	1.31682e-11	1.80182e-11	2.4096e-11	1.78775e-11	3.81966e-11	1.72551e-11	2.1948e-11	1.89856e-11	1.85958e-11	2.08411e-11	1.81042e-11	2.18674e-11
21.28	1.56137e-11	1.64305e-11		1.71817e-11	1.73279e-11		1.95206e-11	1.31665e-11	1.80142e-11	2.40981e-11	1.78781e-11	3.81977e-11	1.7254e-11	2.19487e-11	1.89908e-11	1.85967e-11	2.08385e-11	1.80994e-11	2.18641e-11
21.3	1.56212e-11	1.64339e-11		1.71833e-11	1.73312e-11		1.95223e-11	1.31746e-11	1.80166e-11	2.40984e-11	1.78737e-11	3.81855e-11	1.72579e-11	2.19552e-11	1.8992e-11	1.85952e-11	2.08442e-11	1.80985e-11	2.1872e-11
21.32	1.56191e-11	1.64318e-11		1.71801e-11	1.73266e-11		1.9556e-11	1.31761e-11	1.80114e-11	2.40935e-11	1.78826e-11	3.82019e-11	1.72808e-11	2.19517e-11	1.89875e-11	1.85902e-11	2.08358e-11	1.80995e-11	2.18576e-11
21.34	1.56202e-11	1.64346e-11		1.71776e-11	1.73211e-11		1.95206e-11	1.31718e-11	1.8016e-11	2.41014e-11	1.78792e-11	3.81949e-11	1.72638e-11	2.19535e-11	1.89838e-11	1.8595e-11	2.08322e-11	1.80992e-11	2.18636e-11
21.36	1.56121e-11	1.6431e-11		1.7182e-11	1.73345e-11		1.95356e-11	1.31693e-11	1.8019e-11	2.40948e-11	1.78797e-11	3.81948e-11	1.72628e-11	2.19521e-11	1.89933e-11	1.85904e-11	2.08392e-11	1.80953e-11	2.18638e-11
21.38	1.56177e-11	1.64298e-11		1.71823e-11	1.7331e-11		1.95271e-11	1.31716e-11	1.80194e-11	2.40954e-11	1.78777e-11	3.8187e-11	1.72693e-11	2.19555e-11	1.89872e-11	1.85992e-11	2.08363e-11	1.81039e-11	2.18661e-11
21.4	1.56122e-11	1.64376e-11		1.71878e-11	1.73272e-11		1.95283e-11	1.31701e-11	1.80132e-11	2.41003e-11	1.78773e-11	3.81974e-11	1.72663e-11	2.19544e-11	1.89853e-11	1.85899e-11	2.0837e-11	1.81006e-11	2.18617e-11
21.42	1.56164e-11	1.64318e-11		1.71819e-11	1.73201e-11		1.95216e-11	1.31781e-11	1.8017e-11	2.40949e-11	1.78788e-11	3.82026e-11	1.72787e-11	2.1958e-11	1.89904e-11	1.85967e-11	2.08326e-11	1.81054e-11	2.18707e-11
21.44	1.56223e-11	1.64334e-11		1.71816e-11	1.73198e-11		1.95167e-11	1.31765e-11	1.80156e-11	2.41007e-11	1.78759e-11	3.81927e-11	1.72631e-11	2.19536e-11	1.89923e-11	1.85977e-11	2.08315e-11	1.80985e-11	2.18696e-11
21.46	1.56198e-11	1.64334e-11		1.7182e-11	1.73249e-11		1.95269e-11	1.31747e-11	1.80143e-11	2.40994e-11	1.78776e-11	3.81921e-11	1.72823e-11	2.19481e-11	1.89878e-11	1.85955e-11	2.08308e-11	1.8101e-11	2.18658e-11
21.48	1.56267e-11	1.64344e-11		1.71831e-11	1.73286e-11		1.94977e-11	1.31759e-11	1.80189e-11	2.41033e-11	1.78716e-11	3.81999e-11	1.72622e-11	2.1957e-11	1.89904e-11	1.85917e-11	2.08371e-11	1.80968e-11	2.1864e-11
21.5	1.56258e-11	1.64334e-11		1.71808e-11	1.73281e-11		1.95175e-11	1.31773e-11	1.80175e-11	2.4099e-11	1.7872e-11	3.81984e-11	1.72818e-11	2.19524e-11	1.89863e-11	1.85926e-11	2.0835e-11	1.80969e-11	2.18671e-11
21.52	1.56229e-11	1.64445e-11		1.71845e-11	1.73261e-11		1.95407e-11	1.31772e-11	1.80207e-11	2.40995e-11	1.78791e-11	3.81956e-11	1.72836e-11	2.19526e-11	1.89887e-11	1.85956e-11	2.0831e-11	1.8099e-11	2.18604e-11
21.54	1.56258e-11	1.64408e-11		1.71819e-11	1.73239e-11		1.95264e-11	1.31796e-11	1.8018e-11	2.41015e-11	1.78796e-11	3.81913e-11	1.72848e-11	2.19521e-11	1.89921e-11	1.8591e-11	2.0839e-11	1.80967e-11	2.18646e-11
21.56	1.56263e-11	1.64377e-11		1.71801e-11	1.73194e-11		1.95299e-11	1.31786e-11	1.80194e-11	2.40995e-11	1.7874e-11	3.81889e-11	1.72633e-11	2.19502e-11	1.89845e-11	1.8599e-11	2.08342e-11	1.80928e-11	2.18668e-11
21.58	1.56225e-11	1.64393e-11		1.71852e-11	1.73281e-11		1.95138e-11	1.31747e-11	1.80223e-11	2.40916e-11	1.78791e-11	3.81952e-11	1.72815e-11	2.19615e-11	1.89898e-11	1.85924e-11	2.08361e-11	1.80985e-11	2.18708e-11
21.6	1.56333e-11	1.64384e-11		1.71838e-11	1.7326e-11		1.95433e-11	1.31789e-11	1.80272e-11	2.40985e-11	1.78782e-11	3.81973e-11	1.72711e-11	2.19548e-11	1.89887e-11	1.8587e-11	2.08327e-11	1.80947e-11	2.18665e-11
21.62	1.56204e-11	1.64322e-11		1.71841e-11	1.73292e-11		1.95486e-11	1.31841e-11	1.80209e-11	2.41009e-11	1.78747e-11	3.81947e-11	1.72559e-11	2.19505e-11	1.89846e-11	1.86013e-11	2.08305e-11	1.81015e-11	2.18633e-11
21.64	1.56286e-11	1.64397e-11		1.71879e-11	1.73236e-11		1.95483e-11	1.31829e-11	1.80184e-11	2.40987e-11	1.78762e-11	3.81879e-11	1.72556e-11	2.19549e-11	1.89864e-11	1.85902e-11	2.0837e-11	1.8093e-11	2.18586e-11
21.66	1.56332e-11	1.64404e-11		1.71851e-11	1.733e-11		1.95368e-11	1.31842e-11	1.80171e-11	2.41015e-11	1.7876e-11	3.81988e-11	1.72679e-11	2.19506e-11	1.89895e-11	1.85914e-11	2.08348e-11	1.80995e-11	2.18588e-11
21.68	1.56309e-11	1.64301e-11		1.71806e-11	1.73343e-11		1.95398e-11	1.31771e-11	1.80182e-11	2.4095e-11	1.78701e-11	3.81932e-11	1.72586e-11	2.19557e-11	1.89853e-11	1.8593e-11	2.08362e-11	1.80962e-11	2.18609e-11
21.7	1.56366e-11	1.64451e-11		1.71853e-11	1.73294e-11		1.9505e-11	1.31789e-11	1.80212e-11	2.40961e-11	1.78769e-11	3.81991e-11	1.7278e-11	2.19482e-11	1.89936e-11	1.85937e-11	2.08279e-11	1.80948e-11	2.18608e-11
21.72	1.56323e-11	1.64438e-11		1.71861e-11	1.73255e-11		1.95503e-11	1.31841e-11	1.80209e-11	2.40979e-11	1.78736e-11	3.81837e-11	1.72607e-11	2.19602e-11	1.89926e-11	1.8597e-11	2.08362e-11	1.8099e-11	2.18523e-11
21.74	1.56361e-11	1.64407e-11		1.71867e-11	1.73321e-11		1.95297e-11	1.31815e-11	1.80209e-11	2.41006e-11	1.78841e-11	3.819e-11	1.72688e-11	2.19556e-11	1.89967e-11	1.85988e-11	2.08344e-11	1.8097e-11	2.18645e-11
21.76	1.56371e-11	1.64489e-11		1.71897e-11	1.73243e-11		1.95093e-11	1.3179e-11	1.8025e-11	2.40984e-11	1.78835e-11	3.82021e-11	1.72853e-11	2.19548e-11	1.90118e-11	1.85973e-11	2.08291e-11	1.80972e-11	2.18666e-11
21.78	1.56405e-11	1.64526e-11		1.71915e-11	1.73325e-11		1.95273e-11	1.3177e-11	1.80126e-11	2.40964e-11	1.78779e-11	3.82002e-11	1.72664e-11	2.19509e-11	1.90059e-11	1.85954e-11	2.0837e-11	1.80938e-11	2.18566e-11
21.8	1.56355e-11	1.64511e-11		1.71897e-11	1.73267e-11		1.9527e-11	1.31821e-11	1.80197e-11	2.41009e-11	1.78762e-11	3.81931e-11	1.72624e-11	2.19509e-11	1.90011e-11	1.85953e-11	2.08349e-11	1.80905e-11	2.18555e-11
21.82	1.56473e-11	1.64447e-11		1.71889e-11	1.73351e-11		1.95304e-11	1.31816e-11	1.80161e-11	2.40982e-11	1.78705e-11	3.81952e-11	1.72859e-11	2.1954e-11	1.90046e-11	1.85939e-11	2.08319e-11	1.80952e-11	2.1865e-11
21.84	1.56417e-11	1.64533e-11		1.71858e-11	1.73285e-11		1.95258e-11	1.31845e-11	1.80238e-11	2.4099e-11	1.7876e-11	3.81939e-11	1.72598e-11	2.19555e-11	1.9004e-11	1.8589e-11	2.08298e-11	1.80951e-11	2.18682e-11
21.86	1.56425e-11	1.64478e-11		1.71849e-11	1.73344e-11		1.95187e-11	1.31829e-11	1.80206e-11	2.40964e-11	1.78729e-11	3.81938e-11	1.72643e-11	2.19476e-11	1.90066e-11	1.85956e-11	2.08325e-11	1.80951e-11	2.18656e-11
21.88	1.56308e-11	1.6451e-11		1.71887e-11	1.73318e-11		1.95274e-11	1.31857e-11	1.80228e-11	2.40932e-11	1.78742e-11	3.81943e-11	1.72704e-11	2.19567e-11	1.90042e-11	1.85942e-11	2.08333e-11	1.81009e-11	2.18732e-11
21.9	1.56396e-11	1.64512e-11		1.71914e-11	1.73274e-11		1.95079e-11	1.31787e-11	1.80248e-11	2.40977e-11	1.7874e-11	3.81926e-11	1.72765e-11	2.19581e-11	1.90059e-11	1.85938e-11	2.08353e-11	1.80929e-11	2.18593e-11
21.92	1.56352e-11	1.64566e-11		1.71885e-11	1.73305e-11		1.95198e-11	1.31838e-11	1.80302e-11	2.40941e-11	1.78715e-11	3.81967e-11	1.72641e-11	2.19585e-11	1.90096e-11	1.85932e-11	2.08269e-11	1.80875e-11	2.18566e-11
21.94	1.56373e-11	1.64532e-11		1.71851e-11	1.73289e-11		1.95406e-11	1.31872e-11	1.80273e-11	2.40946e-11	1.78791e-11	3.81926e-11	1.7288e-11	2.19573e-11	1.90069e-11	1.85943e-11	2.08328e-11	1.80953e-11	2.18577e-11
21.96	1.56411e-11	1.64494e-11		1.719e-11	1.7327e-11		1.95282e-11	1.31807e-11	1.80319e-11	2.40968e-11	1.78769e-11	3.81927e-11	1.72676e-11	2.19533e-11	1.89964e-11	1.8594e-11	2.08269e-11	1.80948e-11	2.18652e-11
21.98	1.56224e-11	1.64528e-11		1.71899e-11	1.73232e-11		1.94953e-11	1.31843e-11	1.80271e-11	2.41033e-11	1.78772e-11	3.81877e-11	1.72717e-11	2.19569e-11	1.90034e-11	1.85883e-11	2.08433e-11	1.80916e-11	2.18656e-11
22	1.56301e-11	1.64581e-11		1.71901e-11	1.73354e-11		1.95336e-11	1.31786e-11	1.80348e-11	2.40995e-11	1.78757e-11	3.8188e-11	1.72793e-11	2.19574e-11	1.90091e-11	1.85942e-11	2.08367e-11	1.80894e-11	2.18656e-11
22.02	1.56426e-11	1.64502e-11		1.71886e-11	1.73236e-11		1.95288e-11	1.31844e-11	1.80299e-11	2.40984e-11	1.78722e-11	3.81981e-11	1.72721e-11	2.19543e-11	1.90082e-11	1.85952e-11	2.08329e-11	1.80897e-11	2.18629e-11
22.04	1.56463e-11	1.64491e-11		1.71933e-11	1.73238e-11		1.95294e-11	1.31834e-11	1.80283e-11	2.41004e-11	1.78746e-11	3.81937e-11	1.72556e-11	2.1955e-11	1.90065e-11	1.85962e-11	2.08317e-11	1.81004e-11	2.18612e-11
22.06	1.56422e-11	1.64441e-11		1.71898e-11	1.73321e-11		1.95488e-11	1.31851e-11	1.80319e-11	2.41014e-11	1.78782e-11	3.81863e-11	1.72595e-11	2.19546e-11	1.90009e-11	1.85892e-11	2.08349e-11	1.8095e-11	2.18575e-11
22.08	1.56441e-11	1.64484e-11		1.71914e-11	1.73276e-11		1.95202e-11	1.3191e-11	1.80313e-11	2.40966e-11	1.78735e-11	3.81953e-11	1.72373e-11	2.19599e-11	1.90066e-11	1.85908e-11	2.08276e-11	1.80915e-11	2.1866e-11
22.1	1.5644e-11	1.64542e-11		1.71936e-11	1.733e-11		1.95567e-11	1.31913e-11	1.80304e-11	2.4094e-11	1.78735e-11	3.81952e-11	1.72634e-11	2.19575e-11	1.90035e-11	1.86033e-11	2.08275e-11	1.80941e-11	2.18666e-11
22.12	1.56527e-11	1.64605e-11		1.71942e-11	1.73346e-11		1.95526e-11	1.31881e-11	1.80264e-11	2.41001e-11	1.78768e-11	3.81929e-11	1.72621e-11	2.19566e-11	1.90063e-11	1.85971e-11	2.08281e-11	1.80946e-11	2.18676e-11
22.14	1.56392e-11	1.64563e-11		1.71891e-11	1.73335e-11		1.95484e-11	1.31861e-11	1.80351e-11	2.40999e-11	1.78745e-11	3.81821e-11	1.7274e-11	2.19581e-11	1.90134e-11	1.85955e-11	2.08331e-11	1.80944e-11	2.18637e-11
22.16	1.56516e-11	1.64571e-11		1.71916e-11	1.73261e-11		1.95541e-11	1.31862e-11	1.8031e-11	2.40934e-11	1.78766e-11	3.8188e-11	1.72659e-11	2.19557e-11	1.90161e-11	1.85944e-11	2.08334e-11	1.8083e-11	2.18647e-11
22.18	1.56458e-11	1.64636e-11		1.71933e-11	1.7325e-11		1.95377e-11	1.31881e-11	1.80298e-11	2.40989e-11	1.78753e-11	3.81979e-11	1.72827e-11	2.19486e-11	1.901e-11	1.85971e-11	2.08359e-11	1.80942e-11	2.18581e-11
22.2	1.56461e-11	1.6459e-11		1.71917e-11	1.73216e-11		1.95531e-11	1.31866e-11	1.80327e-11	2.40939e-11	1.78752e-11	3.81912e-11	1.72564e-11	2.19534e-11	1.90164e-11	1.85951e-11	2.08363e-11	1.80884e-11	2.18688e-11
22.22	1.56493e-11	1.64534e-11		1.71898e-11	1.73285e-11		1.95246e-11	1.31903e-11	1.80338e-11	2.40977e-11	1.78773e-11	3.81966e-11	1.72788e-11	2.19566e-11	1.90032e-11	1.85913e-11	2.0839e-11	1.80903e-11	2.18617e-11
22.24	1.56526e-11	1.64511e-11		1.7195e-11	1.73307e-11		1.95208e-11	1.3187e-11	1.80328e-11	2.40962e-11	1.78773e-11	3.82005e-11	1.72358e-11	2.19545e-11	1.90208e-11	1.85932e-11	2.08273e-11	1.80876e-11	2.18687e-11
22.26	1.56492e-11	1.64475e-11		1.71914e-11	1.73234e-11		1.95157e-11	1.31839e-11	1.80329e-11	2.4097e-11	1.78751e-11	3.81902e-11	1.72603e-11	2.19571e-11	1.90118e-11	1.85967e-11	2.08333e-11	1.80929e-11	2.187e-11
22.28	1.56443e-11	1.64587e-11		1.71927e-11	1.73274e-11		1.9504e-11	1.31895e-11	1.80387e-11	2.40977e-11	1.78721e-11	3.81955e-11	1.7272e-11	2.19492e-11	1.90063e-11	1.85952e-11	2.08358e-11	1.80945e-11	2.1855e-11
22.3	1.56402e-11	1.64522e-11		1.7197e-11	1.7327e-11		1.95174e-11	1.31925e-11	1.80397e-11	2.40976e-11	1.78776e-11	3.81899e-11	1.72607e-11	2.19532e-11	1.9005e-11	1.85958e-11	2.08315e-11	1.80875e-11	2.18647e-11
22.32	1.5649e-11	1.64503e-11		1.71909e-11	1.73279e-11		1.95084e-11	1.31939e-11	1.80326e-11	2.40999e-11	1.78814e-11	3.81937e-11	1.72484e-11	2.19599e-11	1.90123e-11	1.85943e-11	2.08327e-11	1.80916e-11	2.18645e-11
22.34	1.56517e-11	1.6455e-11		1.71878e-11	1.73226e-11		1.95233e-11	1.31936e-11	1.80377e-11	2.40973e-11	1.78725e-11	3.81871e-11	1.72509e-11	2.19603e-11	1.90179e-11	1.85896e-11	2.08314e-11	1.8084e-11	2.18612e-11
22.36	1.56498e-11	1.64489e-11		1.7193e-11	1.73267e-11		1.95252e-11	1.31897e-11	1.80362e-11	2.40985e-11	1.78743e-11	3.81837e-11	1.72646e-11	2.19552e-11	1.89989e-11	1.85962e-11	2.08368e-11	1.80931e-11	2.18712e-11
22.38	1.56521e-11	1.64577e-11		1.7193e-11	1.7324e-11		1.95275e-11	1.31942e-11	1.80316e-11	2.40961e-11	1.78782e-11	3.81889e-11	1.72678e-11	2.19573e-11	1.90037e-11	1.85957e-11	2.0827e-11	1.80932e-11	2.18616e-11
22.4	1.56536e-11	1.64536e-11		1.71939e-11	1.73294e-11		1.95113e-11	1.31862e-11	1.80337e-11	2.40973e-11	1.78773e-11	3.81877e-11	1.7261e-11	2.19542e-11	1.90097e-11	1.86007e-11	2.08265e-11	1.8091e-11	2.18676e-11
22.42	1.56503e-11	1.64646e-11		1.71916e-11	1.73345e-11		1.95262e-11	1.31909e-11	1.80387e-11	2.41054e-11	1.78766e-11	3.81934e-11	1.72637e-11	2.1954e-11	1.90186e-11	1.85966e-11	2.08315e-11	1.80901e-11	2.18673e-11
22.44	1.5654e-11	1.6459e-11		1.71985e-11	1.73306e-11		1.95352e-11	1.31892e-11	1.8033e-11	2.40997e-11	1.78775e-11	3.81937e-11	1.72562e-11	2.19525e-11	1.90094e-11	1.85938e-11	2.08367e-11	1.80904e-11	2.18643e-11
22.46	1.56443e-11	1.64621e-11		1.71988e-11	1.73266e-11		1.95532e-11	1.31905e-11	1.80304e-11	2.40982e-11	1.78774e-11	3.8194e-11	1.72402e-11	2.19559e-11	1.90132e-11	1.85911e-11	2.08287e-11	1.80898e-11	2.18614e-11
22.48	1.56547e-11	1.64629e-11		1.72012e-11	1.73349e-11		1.95321e-11	1.31965e-11	1.80329e-11	2.40998e-11	1.7874e-11	3.81991e-11	1.72616e-11	2.19573e-11	1.90092e-11	1.85914e-11	2.08392e-11	1.80914e-11	2.18686e-11
22.5	1.56429e-11	1.64559e-11		1.72017e-11	1.73288e-11		1.95374e-11	1.31963e-11	1.80288e-11	2.41025e-11	1.78778e-11	3.81905e-11	1.72707e-11	2.19528e-11	1.90013e-11	1.85969e-11	2.08323e-11	1.8093e-11	2.18601e-11
22.52	1.56508e-11	1.64649e-11		1.71943e-11	1.73267e-11		1.95236e-11	1.31943e-11	1.80312e-11	2.4099e-11	1.78796e-11	3.81882e-11	1.727e-11	2.19567e-11	1.89974e-11	1.85945e-11	2.08369e-11	1.80895e-11	2.18614e-11
22.54	1.56379e-11	1.64587e-11		1.71949e-11	1.73301e-11		1.95418e-11	1.3193e-11	1.80289e-11	2.40978e-11	1.78744e-11	3.81845e-11	1.72613e-11	2.19554e-11	1.90096e-11	1.85987e-11	2.08338e-11	1.80868e-11	2.18602e-11
22.56	1.56375e-11	1.64554e-11		1.71931e-11	1.73278e-11		1.95505e-11	1.31934e-11	1.80299e-11	2.41028e-11	1.78676e-11	3.8201e-11	1.72916e-11	2.19488e-11	1.90111e-11	1.85927e-11	2.08308e-11	1.80864e-11	2.18595e-11
22.58	1.56427e-11	1.64636e-11		1.71949e-11	1.73219e-11		1.95357e-11	1.31933e-11	1.80326e-11	2.40954e-11	1.78694e-11	3.81889e-11	1.72699e-11	2.19536e-11	1.90183e-11	1.85968e-11	2.08296e-11	1.80925e-11	2.18615e-11
22.6	1.5655e-11	1.64577e-11		1.71996e-11	1.73267e-11		1.95212e-11	1.31946e-11	1.8031e-11	2.40956e-11	1.78787e-11	3.81899e-11	1.72638e-11	2.19528e-11	1.90093e-11	1.85888e-11	2.08311e-11	1.80842e-11	2.18577e-11
22.62	1.56409e-11	1.64634e-11		1.71974e-11	1.732e-11		1.95593e-11	1.31928e-11	1.80374e-11	2.40999e-11	1.78708e-11	3.81932e-11	1.72525e-11	2.19503e-11	1.90046e-11	1.85884e-11	2.08373e-11	1.80878e-11	2.18653e-11
22.64	1.56468e-11	1.64601e-11		1.71964e-11	1.73272e-11		1.95398e-11	1.31889e-11	1.80345e-11	2.40928e-11	1.78754e-11	3.81918e-11	1.72583e-11	2.19527e-11	1.90081e-11	1.85929e-11	2.08318e-11	1.80856e-11	2.18644e-11
22.66	1.5654e-11	1.64663e-11		1.71957e-11	1.73284e-11		1.95436e-11	1.31967e-11	1.80294e-11	2.40955e-11	1.78775e-11	3.81919e-11	1.72519e-11	2.19569e-11	1.90105e-11	1.85943e-11	2.08263e-11	1.80906e-11	2.1865e-11
22.68	1.56531e-11	1.64601e-11		1.71939e-11	1.73344e-11		1.95758e-11	1.31919e-11	1.8024e-11	2.40944e-11	1.78711e-11	3.81901e-11	1.7255e-11	2.19509e-11	1.90097e-11	1.85959e-11	2.08207e-11	1.8088e-11	2.18673e-11
22.7	1.56481e-11	1.64651e-11		1.71987e-11	1.73314e-11		1.95437e-11	1.31963e-11	1.80317e-11	2.40964e-11	1.78722e-11	3.81887e-11	1.72511e-11	2.19529e-11	1.90087e-11	1.85945e-11	2.0828e-11	1.80887e-11	2.18642e-11
22.72	1.56699e-11	1.64656e-11		1.71951e-11	1.73259e-11		1.95557e-11	1.31954e-11	1.80297e-11	2.41002e-11	1.78758e-11	3.81894e-11	1.72705e-11	2.19584e-11	1.90011e-11	1.85967e-11	2.08267e-11	1.8081e-11	2.18649e-11
22.74	1.56613e-11	1.64697e-11		1.72014e-11	1.73277e-11		1.95604e-11	1.3192e-11	1.80318e-11	2.41035e-11	1.78709e-11	3.82013e-11	1.72519e-11	2.19527e-11	1.89998e-11	1.85949e-11	2.08353e-11	1.80912e-11	2.18697e-11
22.76	1.56548e-11	1.64659e-11		1.7197e-11	1.73284e-11		1.95406e-11	1.31978e-11	1.803e-11	2.41001e-11	1.78762e-11	3.81942e-11	1.72457e-11	2.19543e-11	1.90051e-11	1.85932e-11	2.08287e-11	1.80841e-11	2.18658e-11
22.78	1.56678e-11	1.64644e-11		1.71919e-11	1.73331e-11		1.95536e-11	1.31954e-11	1.80303e-11	2.41053e-11	1.78756e-11	3.81905e-11	1.72548e-11	2.19566e-11	1.89913e-11	1.85843e-11	2.08242e-11	1.80874e-11	2.18719e-11
22.8	1.56575e-11	1.64637e-11		1.72006e-11	1.73287e-11		1.95488e-11	1.31965e-11	1.80307e-11	2.40917e-11	1.78746e-11	3.81849e-11	1.7264e-11	2.19552e-11	1.89892e-11	1.85954e-11	2.08364e-11	1.80848e-11	2.1867e-11
22.82	1.56594e-11	1.64676e-11		1.71967e-11	1.73298e-11		1.95545e-11	1.31919e-11	1.80405e-11	2.40998e-11	1.78698e-11	3.81873e-11	1.72612e-11	2.19551e-11	1.901e-11	1.85912e-11	2.08299e-11	1.80876e-11	2.18661e-11
22.84	1.5654e-11	1.64681e-11		1.71989e-11	1.73268e-11		1.95461e-11	1.31921e-11	1.8039e-11	2.41003e-11	1.78738e-11	3.81948e-11	1.72652e-11	2.19582e-11	1.89986e-11	1.85904e-11	2.08335e-11	1.80879e-11	2.18712e-11
22.86	1.56517e-11	1.64698e-11		1.71987e-11	1.73252e-11		1.95481e-11	1.31918e-11	1.80365e-11	2.40955e-11	1.78702e-11	3.81882e-11	1.72642e-11	2.19527e-11	1.90108e-11	1.85996e-11	2.08344e-11	1.80861e-11	2.18701e-11
22.88	1.56563e-11	1.64692e-11		1.71976e-11	1.73277e-11		1.95468e-11	1.31978e-11	1.80359e-11	2.40885e-11	1.787e-11	3.81869e-11	1.72431e-11	2.19569e-11	1.89993e-11	1.85937e-11	2.08262e-11	1.80906e-11	2.18638e-11
22.9	1.56587e-11	1.64648e-11		1.71972e-11	1.73277e-11		1.9562e-11	1.31966e-11	1.80352e-11	2.40937e-11	1.78648e-11	3.81895e-11	1.72522e-11	2.19534e-11	1.90059e-11	1.85952e-11	2.0829e-11	1.80868e-11	2.18674e-11
22.92	1.56639e-11	1.64618e-11		1.71944e-11	1.7329e-11		1.95567e-11	1.31964e-11	1.8035e-11	2.41016e-11	1.78775e-11	3.81895e-11	1.72491e-11	2.19522e-11	1.9003e-11	1.85958e-11	2.08358e-11	1.8089e-11	2.18594e-11
22.94	1.56636e-11	1.64625e-11		1.72014e-11	1.73219e-11		1.95598e-11	1.31968e-11	1.80374e-11	2.40943e-11	1.78777e-11	3.81885e-11	1.72609e-11	2.1956e-11	1.89955e-11	1.8593e-11	2.08344e-11	1.80898e-11	2.18663e-11
22.96	1.56622e-11	1.64608e-11		1.72036e-11	1.73259e-11		1.95771e-11	1.32001e-11	1.80394e-11	2.40908e-11	1.78757e-11	3.81916e-11	1.72506e-11	2.19533e-11	1.89971e-11	1.85928e-11	2.08337e-11	1.80855e-11	2.18755e-11
22.98	1.56478e-11	1.64632e-11		1.72076e-11	1.73341e-11		1.95597e-11	1.31957e-11	1.80381e-11	2.41006e-11	1.78712e-11	3.81889e-11	1.72663e-11	2.19522e-11	1.8998e-11	1.85981e-11	2.08373e-11	1.80855e-11	2.18592e-11
23	1.56587e-11	1.6461e-11		1.71973e-11	1.73305e-11		1.95391e-11	1.3197e-11	1.80368e-11	2.40978e-11	1.78779e-11	3.81918e-11	1.72437e-11	2.19541e-11	1.89922e-11	1.85956e-11	2.08367e-11	1.80864e-11	2.18603e-11
23.02	1.56582e-11	1.64602e-11		1.72006e-11	1.73248e-11		1.95647e-11	1.31907e-11	1.80425e-11	2.40965e-11	1.788e-11	3.81917e-11	1.7245e-11	2.19498e-11	1.89964e-11	1.85996e-11	2.08312e-11	1.80888e-11	2.18634e-11
23.04	1.5662e-11	1.6467e-11		1.72026e-11	1.73331e-11		1.95553e-11	1.31994e-11	1.80357e-11	2.40965e-11	1.78765e-11	3.81866e-11	1.72473e-11	2.19597e-11	1.90001e-11	1.85916e-11	2.08323e-11	1.80846e-11	2.18642e-11
23.06	1.56648e-11	1.6462e-11		1.71982e-11	1.73295e-11		1.95647e-11	1.31913e-11	1.80374e-11	2.40979e-11	1.78783e-11	3.819e-11	1.72519e-11	2.19572e-11	1.89952e-11	1.85954e-11	2.08403e-11	1.80892e-11	2.18619e-11
23.08	1.56641e-11	1.64629e-11		1.72019e-11	1.73288e-11		1.95343e-11	1.31944e-11	1.80351e-11	2.40982e-11	1.78718e-11	3.81776e-11	1.72502e-11	2.19488e-11	1.89924e-11	1.85895e-11	2.08307e-11	1.80862e-11	2.1863e-11
23.1	1.56636e-11	1.64699e-11		1.71984e-11	1.73351e-11		1.95579e-11	1.31961e-11	1.80376e-11	2.40961e-11	1.78753e-11	3.81911e-11	1.72572e-11	2.19549e-11	1.90022e-11	1.8595e-11	2.08348e-11	1.80905e-11	2.18693e-11
23.12	1.56666e-11	1.64631e-11		1.71967e-11	1.73249e-11		1.95532e-11	1.31982e-11	1.80401e-11	2.40974e-11	1.78747e-11	3.81917e-11	1.72429e-11	2.19525e-11	1.89857e-11	1.85983e-11	2.08367e-11	1.80848e-11	2.18672e-11
23.14	1.56658e-11	1.64647e-11		1.71972e-11	1.73316e-11		1.95592e-11	1.3196e-11	1.80377e-11	2.40984e-11	1.78776e-11	3.81893e-11	1.72522e-11	2.196e-11	1.89926e-11	1.85945e-11	2.08385e-11	1.8089e-11	2.18678e-11
23.16	1.56681e-11	1.64642e-11		1.71957e-11	1.73288e-11		1.95541e-11	1.31985e-11	1.80327e-11	2.40981e-11	1.78756e-11	3.81869e-11	1.72547e-11	2.19558e-11	1.89949e-11	1.85962e-11	2.08377e-11	1.80883e-11	2.18703e-11
23.18	1.56679e-11	1.64691e-11		1.71974e-11	1.7332e-11		1.957e-11	1.31958e-11	1.80383e-11	2.41021e-11	1.78815e-11	3.81928e-11	1.72404e-11	2.1949e-11	1.89917e-11	1.85909e-11	2.08349e-11	1.80854e-11	2.18591e-11
23.2	1.56627e-11	1.64736e-11		1.71986e-11	1.73314e-11		1.95614e-11	1.31928e-11	1.80359e-11	2.40929e-11	1.78808e-11	3.81904e-11	1.7237e-11	2.1958e-11	1.89897e-11	1.8589e-11	2.08346e-11	1.8086e-11	2.1864e-11
23.22	1.56614e-11	1.64631e-11		1.72015e-11	1.73299e-11		1.95492e-11	1.31951e-11	1.803e-11	2.41011e-11	1.78735e-11	3.81833e-11	1.72559e-11	2.19609e-11	1.89973e-11	1.85933e-11	2.08261e-11	1.80827e-11	2.18668e-11
23.24	1.56625e-11	1.64556e-11		1.72066e-11	1.73266e-11		1.9586e-11	1.31989e-11	1.80384e-11	2.40939e-11	1.78741e-11	3.81918e-11	1.72462e-11	2.19548e-11	1.89951e-11	1.85997e-11	2.08282e-11	1.80879e-11	2.18617e-11
23.26	1.56708e-11	1.6463e-11		1.71983e-11	1.73251e-11		1.95679e-11	1.31952e-11	1.8038e-11	2.4098e-11	1.78804e-11	3.81885e-11	1.72429e-11	2.19539e-11	1.89965e-11	1.85919e-11	2.08283e-11	1.80932e-11	2.18671e-11
23.28	1.56679e-11	1.64681e-11		1.72002e-11	1.73281e-11		1.9568e-11	1.31985e-11	1.8036e-11	2.40955e-11	1.78785e-11	3.8192e-11	1.72463e-11	2.19594e-11	1.89938e-11	1.85969e-11	2.0828e-11	1.809e-11	2.18664e-11
23.3	1.56643e-11	1.64559e-11		1.72044e-11	1.7334e-11		1.95615e-11	1.31967e-11	1.80341e-11	2.40943e-11	1.78778e-11	3.81913e-11	1.72483e-11	2.19557e-11	1.8986e-11	1.85981e-11	2.08296e-11	1.80885e-11	2.18651e-11
23.32	1.56667e-11	1.64737e-11		1.72018e-11	1.73284e-11		1.95748e-11	1.31952e-11	1.80372e-11	2.40969e-11	1.78771e-11	3.81949e-11	1.72572e-11	2.19568e-11	1.89906e-11	1.8595e-11	2.08443e-11	1.80855e-11	2.18579e-11
23.34	1.56616e-11	1.64689e-11		1.72026e-11	1.73249e-11		1.95829e-11	1.31956e-11	1.80402e-11	2.41022e-11	1.78822e-11	3.8197e-11	1.72542e-11	2.19522e-11	1.89981e-11	1.85968e-11	2.08273e-11	1.80858e-11	2.1864e-11
23.36	1.56651e-11	1.64679e-11		1.72042e-11	1.73287e-11		1.95723e-11	1.3199e-11	1.80456e-11	2.41027e-11	1.78777e-11	3.81858e-11	1.72457e-11	2.19565e-11	1.89983e-11	1.85948e-11	2.08375e-11	1.8087e-11	2.18615e-11
23.38	1.56678e-11	1.64715e-11		1.72035e-11	1.73333e-11		1.9568e-11	1.31966e-11	1.80418e-11	2.40976e-11	1.78769e-11	3.81887e-11	1.72593e-11	2.19559e-11	1.90013e-11	1.85968e-11	2.08209e-11	1.80923e-11	2.18675e-11
23.4	1.56817e-11	1.64678e-11		1.72029e-11	1.73273e-11		1.9552e-11	1.31938e-11	1.80401e-11	2.41034e-11	1.78793e-11	3.81908e-11	1.72621e-11	2.19516e-11	1.89986e-11	1.85934e-11	2.08347e-11	1.80875e-11	2.18643e-11
23.42	1.56754e-11	1.64771e-11		1.72017e-11	1.73337e-11		1.95631e-11	1.3205e-11	1.80388e-11	2.4102e-11	1.78767e-11	3.81896e-11	1.72503e-11	2.19565e-11	1.89921e-11	1.85974e-11	2.08321e-11	1.80857e-11	2.18665e-11
23.44	1.56655e-11	1.64702e-11		1.72048e-11	1.733e-11		1.95685e-11	1.3199e-11	1.80434e-11	2.41035e-11	1.78735e-11	3.81853e-11	1.72401e-11	2.19495e-11	1.89914e-11	1.85937e-11	2.0832e-11	1.80867e-11	2.18603e-11
23.46	1.56742e-11	1.64769e-11		1.72028e-11	1.73314e-11		1.95772e-11	1.31968e-11	1.80431e-11	2.41002e-11	1.7876e-11	3.81858e-11	1.72459e-11	2.19519e-11	1.89949e-11	1.85934e-11	2.08357e-11	1.80906e-11	2.18659e-11
23.48	1.5663e-11	1.64742e-11		1.72058e-11	1.73298e-11		1.95427e-11	1.32003e-11	1.80417e-11	2.41015e-11	1.78779e-11	3.81913e-11	1.72358e-11	2.1952e-11	1.89942e-11	1.85936e-11	2.08315e-11	1.80885e-11	2.18617e-11
23.5	1.56746e-11	1.64683e-11		1.72047e-11	1.73297e-11		1.9538e-11	1.31997e-11	1.80422e-11	2.41024e-11	1.78742e-11	3.81848e-11	1.72377e-11	2.19536e-11	1.89915e-11	1.85971e-11	2.08435e-11	1.80871e-11	2.18702e-11
23.52	1.56779e-11	1.64722e-11		1.72083e-11	1.73289e-11		1.9546e-11	1.31971e-11	1.80425e-11	2.40978e-11	1.78786e-11	3.81966e-11	1.72468e-11	2.19545e-11	1.89925e-11	1.85943e-11	2.0834e-11	1.80863e-11	2.18648e-11
23.54	1.56637e-11	1.64636e-11		1.72086e-11	1.73285e-11		1.95456e-11	1.31938e-11	1.80425e-11	2.4098e-11	1.78774e-11	3.81936e-11	1.72714e-11	2.19516e-11	1.89978e-11	1.85935e-11	2.08314e-11	1.80884e-11	2.18682e-11
23.56	1.56731e-11	1.64726e-11		1.72044e-11	1.73315e-11		1.95588e-11	1.31929e-11	1.80415e-11	2.41021e-11	1.78764e-11	3.81975e-11	1.727e-11	2.19556e-11	1.89969e-11	1.85931e-11	2.08314e-11	1.80868e-11	2.18594e-11
23.58	1.56785e-11	1.64786e-11		1.72001e-11	1.73293e-11		1.95438e-11	1.31938e-11	1.80458e-11	2.4101e-11	1.78766e-11	3.81888e-11	1.72443e-11	2.19584e-11	1.89897e-11	1.85941e-11	2.08384e-11	1.80867e-11	2.1864e-11
23.6	1.56754e-11	1.64623e-11		1.72022e-11	1.73289e-11		1.95562e-11	1.31971e-11	1.80392e-11	2.41026e-11	1.78771e-11	3.81908e-11	1.72475e-11	2.19476e-11	1.8994e-11	1.85915e-11	2.08351e-11	1.80928e-11	2.18617e-11
23.62	1.56762e-11	1.64677e-11		1.72048e-11	1.73307e-11		1.95382e-11	1.31982e-11	1.80438e-11	2.41054e-11	1.78761e-11	3.81879e-11	1.72534e-11	2.19523e-11	1.89917e-11	1.85991e-11	2.08379e-11	1.80808e-11	2.18618e-11
23.64	1.56731e-11	1.64714e-11		1.72093e-11	1.73314e-11		1.95646e-11	1.31968e-11	1.80371e-11	2.41057e-11	1.78754e-11	3.81915e-11	1.72484e-11	2.19559e-11	1.89948e-11	1.85982e-11	2.08308e-11	1.80917e-11	2.18613e-11
23.66	1.56761e-11	1.64806e-11		1.72056e-11	1.73368e-11		1.95657e-11	1.32016e-11	1.80442e-11	2.41001e-11	1.78784e-11	3.81958e-11	1.72606e-11	2.19596e-11	1.89935e-11	1.85957e-11	2.08389e-11	1.80935e-11	2.1866e-11
23.68	1.56697e-11	1.64818e-11		1.72083e-11	1.73277e-11		1.95804e-11	1.31976e-11	1.80402e-11	2.41082e-11	1.78764e-11	3.81892e-11	1.72512e-11	2.19518e-11	1.89927e-11	1.85952e-11	2.08341e-11	1.80848e-11	2.18599e-11
23.7	1.56765e-11	1.6474e-11		1.72131e-11	1.73316e-11		1.95732e-11	1.32006e-11	1.80354e-11	2.41017e-11	1.78709e-11	3.8199e-11	1.72485e-11	2.19569e-11	1.89915e-11	1.85982e-11	2.08421e-11	1.8096e-11	2.18641e-11
23.72	1.56763e-11	1.64774e-11		1.72108e-11	1.73384e-11		1.95743e-11	1.31977e-11	1.80427e-11	2.40989e-11	1.78822e-11	3.81907e-11	1.7234e-11	2.19586e-11	1.89971e-11	1.85957e-11	2.08443e-11	1.80798e-11	2.18663e-11
23.74	1.56697e-11	1.64729e-11		1.72099e-11	1.73296e-11		1.95771e-11	1.32002e-11	1.80382e-11	2.40968e-11	1.7873e-11	3.81885e-11	1.7253e-11	2.19618e-11	1.89936e-11	1.85954e-11	2.08409e-11	1.80897e-11	2.18689e-11
23.76	1.56788e-11	1.64689e-11		1.72085e-11	1.7332e-11		1.95859e-11	1.32004e-11	1.80418e-11	2.41002e-11	1.78791e-11	3.8189e-11	1.72605e-11	2.1971e-11	1.89915e-11	1.85943e-11	2.08343e-11	1.80929e-11	2.18677e-11
23.78	1.56734e-11	1.64676e-11		1.7206e-11	1.73366e-11		1.95566e-11	1.32023e-11	1.80432e-11	2.41045e-11	1.78754e-11	3.81852e-11	1.72343e-11	2.19694e-11	1.89863e-11	1.85937e-11	2.08329e-11	1.80823e-11	2.18676e-11
23.8	1.5677e-11	1.64698e-11		1.7211e-11	1.7325e-11		1.95706e-11	1.32008e-11	1.8044e-11	2.41034e-11	1.78768e-11	3.81926e-11	1.72437e-11	2.19619e-11	1.89931e-11	1.85932e-11	2.08423e-11	1.80827e-11	2.18702e-11
23.82	1.56756e-11	1.6479e-11		1.72137e-11	1.73358e-11		1.95675e-11	1.31999e-11	1.80414e-11	2.41016e-11	1.7873e-11	3.81871e-11	1.72572e-11	2.19646e-11	1.89927e-11	1.85939e-11	2.08338e-11	1.80849e-11	2.18667e-11
23.84	1.56776e-11	1.64803e-11		1.72125e-11	1.73279e-11		1.95529e-11	1.31965e-11	1.80401e-11	2.41013e-11	1.78714e-11	3.8194e-11	1.72511e-11	2.19627e-11	1.89833e-11	1.85974e-11	2.08403e-11	1.80917e-11	2.18609e-11
23.86	1.56741e-11	1.64757e-11		1.72133e-11	1.73304e-11		1.95566e-11	1.31993e-11	1.80472e-11	2.41019e-11	1.78741e-11	3.81886e-11	1.72353e-11	2.19617e-11	1.89882e-11	1.85927e-11	2.08396e-11	1.80917e-11	2.18617e-11
23.88	1.56874e-11	1.64659e-11		1.72081e-11	1.73301e-11		1.95312e-11	1.31958e-11	1.80441e-11	2.40979e-11	1.78799e-11	3.81872e-11	1.72519e-11	2.19613e-11	1.89923e-11	1.85936e-11	2.08461e-11	1.80919e-11	2.18638e-11
23.9	1.5677e-11	1.64778e-11		1.7213e-11	1.73373e-11		1.95795e-11	1.32025e-11	1.80478e-11	2.40979e-11	1.78715e-11	3.81909e-11	1.72589e-11	2.19624e-11	1.8999e-11	1.85957e-11	2.08353e-11	1.80834e-11	2.18639e-11
23.92	1.56749e-11	1.64805e-11		1.72153e-11	1.73335e-11		1.95397e-11	1.32008e-11	1.80462e-11	2.40965e-11	1.78732e-11	3.81851e-11	1.72584e-11	2.19609e-11	1.89991e-11	1.85936e-11	2.08346e-11	1.80858e-11	2.18674e-11
23.94	1.56762e-11	1.64674e-11		1.72118e-11	1.73312e-11		1.95473e-11	1.31972e-11	1.80416e-11	2.41007e-11	1.78738e-11	3.81951e-11	1.72612e-11	2.19581e-11	1.89952e-11	1.85904e-11	2.08277e-11	1.80846e-11	2.18641e-11
23.96	1.568e-11	1.64734e-11		1.72066e-11	1.73324e-11		1.95536e-11	1.32e-11	1.80452e-11	2.41005e-11	1.78738e-11	3.8184e-11	1.7252e-11	2.19623e-11	1.8993e-11	1.85931e-11	2.0837e-11	1.80933e-11	2.1862e-11
23.98	1.56783e-11	1.64683e-11		1.72157e-11	1.73338e-11		1.95688e-11	1.31998e-11	1.80403e-11	2.41031e-11	1.78757e-11	3.81872e-11	1.72493e-11	2.19552e-11	1.89874e-11	1.85918e-11	2.08281e-11	1.80928e-11	2.18659e-11
24	1.56801e-11	1.6467e-11		1.72098e-11	1.73317e-11		1.95688e-11	1.32032e-11	1.80413e-11	2.40993e-11	1.78686e-11	3.81918e-11	1.72514e-11	2.19576e-11	1.89867e-11	1.85926e-11	2.0827e-11	1.80897e-11	2.18606e-11
24.02	1.56852e-11	1.64765e-11		1.72072e-11	1.73362e-11		1.95788e-11	1.32065e-11	1.80406e-11	2.41016e-11	1.78776e-11	3.81899e-11	1.72447e-11	2.19583e-11	1.89917e-11	1.85948e-11	2.08344e-11	1.8092e-11	2.18688e-11
24.04	1.56848e-11	1.64769e-11		1.72126e-11	1.73339e-11		1.9526e-11	1.31997e-11	1.80455e-11	2.40983e-11	1.78727e-11	3.81885e-11	1.72411e-11	2.19547e-11	1.89923e-11	1.85928e-11	2.08377e-11	1.80867e-11	2.18631e-11
24.06	1.56831e-11	1.64794e-11		1.72137e-11	1.73312e-11		1.95291e-11	1.31987e-11	1.80427e-11	2.41005e-11	1.78717e-11	3.81849e-11	1.72491e-11	2.19592e-11	1.8985e-11	1.85952e-11	2.08311e-11	1.80868e-11	2.18594e-11
24.08	1.56817e-11	1.64735e-11		1.7218e-11	1.73361e-11		1.95568e-11	1.31996e-11	1.80427e-11	2.41001e-11	1.7879e-11	3.81925e-11	1.72463e-11	2.19604e-11	1.89916e-11	1.85959e-11	2.08467e-11	1.80881e-11	2.18614e-11
24.1	1.56822e-11	1.64681e-11		1.72142e-11	1.7338e-11		1.9532e-11	1.31994e-11	1.8047e-11	2.40978e-11	1.78724e-11	3.81947e-11	1.72665e-11	2.19582e-11	1.89878e-11	1.8594e-11	2.08313e-11	1.80884e-11	2.18575e-11
24.12	1.5691e-11	1.64739e-11		1.72164e-11	1.73371e-11		1.95345e-11	1.31977e-11	1.80471e-11	2.41031e-11	1.78729e-11	3.81904e-11	1.72493e-11	2.19582e-11	1.89862e-11	1.85904e-11	2.08343e-11	1.8087e-11	2.18591e-11
24.14	1.56872e-11	1.64676e-11		1.72192e-11	1.7337e-11		1.95468e-11	1.32017e-11	1.80395e-11	2.40973e-11	1.7874e-11	3.81927e-11	1.72622e-11	2.1957e-11	1.89896e-11	1.85923e-11	2.08341e-11	1.80943e-11	2.18577e-11
24.16	1.56882e-11	1.64658e-11		1.72171e-11	1.73346e-11		1.95614e-11	1.31993e-11	1.80433e-11	2.40941e-11	1.78745e-11	3.81926e-11	1.72578e-11	2.19663e-11	1.89854e-11	1.85928e-11	2.08397e-11	1.80869e-11	2.18581e-11
24.18	1.56884e-11	1.64617e-11		1.72168e-11	1.7339e-11		1.95181e-11	1.31991e-11	1.80411e-11	2.41022e-11	1.78746e-11	3.81986e-11	1.72547e-11	2.1962e-11	1.89877e-11	1.85958e-11	2.08351e-11	1.80873e-11	2.18637e-11
24.2	1.56832e-11	1.64627e-11		1.72157e-11	1.73354e-11		1.95547e-11	1.3199e-11	1.80447e-11	2.40925e-11	1.78763e-11	3.81933e-11	1.72565e-11	2.19556e-11	1.89907e-11	1.8591e-11	2.08349e-11	1.80859e-11	2.1864e-11
24.22	1.56881e-11	1.6474e-11		1.7216e-11	1.73307e-11		1.95643e-11	1.31959e-11	1.804e-11	2.41042e-11	1.78717e-11	3.81848e-11	1.72644e-11	2.19549e-11	1.89903e-11	1.85948e-11	2.08393e-11	1.80907e-11	2.18533e-11
24.24	1.56902e-11	1.64697e-11		1.72197e-11	1.73351e-11		1.95566e-11	1.31904e-11	1.8037e-11	2.41e-11	1.78713e-11	3.8187e-11	1.72474e-11	2.19624e-11	1.89894e-11	1.85926e-11	2.08387e-11	1.80986e-11	2.18509e-11
24.26	1.5683e-11	1.64689e-11		1.72177e-11	1.73375e-11		1.95711e-11	1.31944e-11	1.80417e-11	2.41059e-11	1.78721e-11	3.81921e-11	1.72441e-11	2.19658e-11	1.89957e-11	1.85908e-11	2.08379e-11	1.80928e-11	2.18647e-11
24.28	1.56909e-11	1.64686e-11		1.7219e-11	1.73339e-11		1.95466e-11	1.3195e-11	1.80374e-11	2.41024e-11	1.78748e-11	3.81852e-11	1.72529e-11	2.19631e-11	1.89943e-11	1.85933e-11	2.08389e-11	1.80935e-11	2.18621e-11
24.3	1.56843e-11	1.64702e-11		1.72234e-11	1.73285e-11		1.95405e-11	1.32083e-11	1.80391e-11	2.41015e-11	1.78729e-11	3.82005e-11	1.72481e-11	2.19613e-11	1.89881e-11	1.85852e-11	2.08368e-11	1.80907e-11	2.18582e-11
24.32	1.56792e-11	1.64721e-11		1.72148e-11	1.73304e-11		1.95558e-11	1.32007e-11	1.80379e-11	2.41035e-11	1.78726e-11	3.81973e-11	1.72465e-11	2.19671e-11	1.89913e-11	1.85919e-11	2.08366e-11	1.80892e-11	2.18582e-11
24.34	1.56846e-11	1.64638e-11		1.72228e-11	1.73391e-11		1.95548e-11	1.3198e-11	1.80436e-11	2.40969e-11	1.7868e-11	3.81929e-11	1.72519e-11	2.19634e-11	1.89835e-11	1.85826e-11	2.08308e-11	1.80947e-11	2.1853e-11
24.36	1.56863e-11	1.6475e-11		1.72194e-11	1.73406e-11		1.9532e-11	1.32036e-11	1.80386e-11	2.40985e-11	1.78713e-11	3.81896e-11	1.72541e-11	2.19594e-11	1.8989e-11	1.85885e-11	2.0838e-11	1.80966e-11	2.18581e-11
24.38	1.56895e-11	1.64746e-11		1.72193e-11	1.73412e-11		1.95523e-11	1.31983e-11	1.80452e-11	2.41009e-11	1.78702e-11	3.81843e-11	1.72568e-11	2.19576e-11	1.89919e-11	1.85887e-11	2.08377e-11	1.80866e-11	2.18639e-11
24.4	1.56899e-11	1.64681e-11		1.72221e-11	1.73388e-11		1.95651e-11	1.32019e-11	1.80411e-11	2.41003e-11	1.7871e-11	3.81868e-11	1.72524e-11	2.19611e-11	1.89889e-11	1.85885e-11	2.08396e-11	1.80841e-11	2.18667e-11
24.42	1.56743e-11	1.64751e-11		1.72206e-11	1.73379e-11		1.95688e-11	1.31987e-11	1.80424e-11	2.40995e-11	1.78711e-11	3.81792e-11	1.7243e-11	2.1956e-11	1.89915e-11	1.85877e-11	2.0838e-11	1.80899e-11	2.18581e-11
24.44	1.56773e-11	1.64798e-11		1.72237e-11	1.73354e-11		1.95635e-11	1.32014e-11	1.80432e-11	2.40981e-11	1.78794e-11	3.81873e-11	1.72308e-11	2.19578e-11	1.89908e-11	1.85909e-11	2.08302e-11	1.8093e-11	2.18543e-11
24.46	1.5691e-11	1.64762e-11		1.7217e-11	1.734e-11		1.95379e-11	1.32045e-11	1.80421e-11	2.40972e-11	1.78748e-11	3.81903e-11	1.72323e-11	2.19585e-11	1.89872e-11	1.85868e-11	2.08301e-11	1.80921e-11	2.18607e-11
24.48	1.56789e-11	1.64736e-11		1.72222e-11	1.73374e-11		1.95205e-11	1.3197e-11	1.8047e-11	2.40947e-11	1.78678e-11	3.81842e-11	1.72362e-11	2.19675e-11	1.89892e-11	1.85796e-11	2.08343e-11	1.80883e-11	2.18638e-11
24.5	1.56834e-11	1.64689e-11		1.72197e-11	1.73307e-11		1.95122e-11	1.3202e-11	1.80424e-11	2.40989e-11	1.78751e-11	3.81905e-11	1.72376e-11	2.1961e-11	1.89881e-11	1.8578e-11	2.08406e-11	1.80881e-11	2.18633e-11
24.52	1.56793e-11	1.6478e-11		1.72198e-11	1.73381e-11		1.95374e-11	1.31999e-11	1.80408e-11	2.40918e-11	1.78763e-11	3.81931e-11	1.72477e-11	2.19625e-11	1.8992e-11	1.85841e-11	2.08411e-11	1.80875e-11	2.18571e-11
24.54	1.56861e-11	1.64815e-11		1.72176e-11	1.73377e-11		1.95365e-11	1.31994e-11	1.80444e-11	2.40999e-11	1.78753e-11	3.81879e-11	1.72567e-11	2.19604e-11	1.89836e-11	1.85795e-11	2.08353e-11	1.80951e-11	2.18566e-11
24.56	1.56752e-11	1.64761e-11		1.72224e-11	1.73372e-11		1.95588e-11	1.32049e-11	1.80488e-11	2.41031e-11	1.78761e-11	3.81769e-11	1.72476e-11	2.19613e-11	1.89835e-11	1.85789e-11	2.08296e-11	1.8092e-11	2.18529e-11
24.58	1.56834e-11	1.64745e-11		1.7221e-11	1.73343e-11		1.95418e-11	1.32002e-11	1.80439e-11	2.41085e-11	1.78732e-11	3.81851e-11	1.72577e-11	2.19558e-11	1.89808e-11	1.85824e-11	2.08291e-11	1.80953e-11	2.18491e-11
24.6	1.56883e-11	1.64777e-11		1.72188e-11	1.7338e-11		1.95107e-11	1.31981e-11	1.80443e-11	2.41023e-11	1.78717e-11	3.81977e-11	1.7263e-11	2.19604e-11	1.89887e-11	1.85859e-11	2.08415e-11	1.80959e-11	2.18619e-11
24.62	1.56922e-11	1.64671e-11		1.72217e-11	1.73306e-11		1.95368e-11	1.31953e-11	1.8045e-11	2.41006e-11	1.78728e-11	3.81876e-11	1.72491e-11	2.19579e-11	1.89932e-11	1.85803e-11	2.0837e-11	1.80942e-11	2.18591e-11
24.64	1.56843e-11	1.64701e-11		1.72245e-11	1.73386e-11		1.95488e-11	1.32017e-11	1.80505e-11	2.41029e-11	1.78779e-11	3.81968e-11	1.72374e-11	2.19605e-11	1.89883e-11	1.85819e-11	2.08388e-11	1.80856e-11	2.18482e-11
24.66	1.56907e-11	1.6476e-11		1.72208e-11	1.73357e-11		1.95439e-11	1.3202e-11	1.80426e-11	2.4099e-11	1.78723e-11	3.81881e-11	1.72211e-11	2.19627e-11	1.89842e-11	1.85771e-11	2.08308e-11	1.80894e-11	2.18504e-11
24.68	1.56827e-11	1.64672e-11		1.72157e-11	1.73343e-11		1.95393e-11	1.31957e-11	1.8044e-11	2.40986e-11	1.78715e-11	3.819e-11	1.7239e-11	2.19672e-11	1.89848e-11	1.85806e-11	2.0828e-11	1.80895e-11	2.18586e-11
24.7	1.56867e-11	1.64771e-11		1.72194e-11	1.73384e-11		1.95207e-11	1.31973e-11	1.80454e-11	2.4102e-11	1.78731e-11	3.81907e-11	1.72321e-11	2.19587e-11	1.89856e-11	1.85823e-11	2.08344e-11	1.80852e-11	2.18621e-11
24.72	1.56881e-11	1.64728e-11		1.72171e-11	1.73387e-11		1.95086e-11	1.32029e-11	1.80494e-11	2.41015e-11	1.78778e-11	3.8197e-11	1.72268e-11	2.19611e-11	1.89895e-11	1.85775e-11	2.08352e-11	1.80945e-11	2.18521e-11
24.74	1.5688e-11	1.64847e-11		1.72186e-11	1.73397e-11		1.95268e-11	1.32024e-11	1.8051e-11	2.41002e-11	1.78749e-11	3.81961e-11	1.72357e-11	2.19588e-11	1.89961e-11	1.85853e-11	2.08484e-11	1.8097e-11	2.18528e-11
24.76	1.56881e-11	1.64759e-11		1.72199e-11	1.73342e-11		1.953e-11	1.32033e-11	1.80461e-11	2.41074e-11	1.78846e-11	3.81887e-11	1.72352e-11	2.19577e-11	1.89859e-11	1.85826e-11	2.08309e-11	1.80899e-11	2.18501e-11
24.78	1.56861e-11	1.64723e-11		1.72227e-11	1.73369e-11		1.95243e-11	1.32056e-11	1.80517e-11	2.41045e-11	1.78768e-11	3.81846e-11	1.72409e-11	2.19606e-11	1.89837e-11	1.85813e-11	2.08379e-11	1.80866e-11	2.1851e-11
24.8	1.56954e-11	1.64839e-11		1.72219e-11	1.73438e-11		1.95499e-11	1.31965e-11	1.80487e-11	2.41054e-11	1.78726e-11	3.81853e-11	1.72362e-11	2.19581e-11	1.89862e-11	1.85817e-11	2.08357e-11	1.80885e-11	2.18563e-11
24.82	1.56925e-11	1.64745e-11		1.722e-11	1.73353e-11		1.95467e-11	1.3202e-11	1.80524e-11	2.4108e-11	1.78801e-11	3.81909e-11	1.72616e-11	2.19634e-11	1.89911e-11	1.85805e-11	2.08309e-11	1.80956e-11	2.18591e-11
24.84	1.56884e-11	1.64831e-11		1.72217e-11	1.73369e-11		1.95427e-11	1.32064e-11	1.8052e-11	2.41039e-11	1.78741e-11	3.81881e-11	1.7245e-11	2.19606e-11	1.89849e-11	1.85799e-11	2.08398e-11	1.80894e-11	2.1861e-11
24.86	1.56942e-11	1.6478e-11		1.72228e-11	1.73417e-11		1.95198e-11	1.32019e-11	1.80485e-11	2.41034e-11	1.78785e-11	3.81935e-11	1.72313e-11	2.19565e-11	1.89831e-11	1.85842e-11	2.08386e-11	1.80878e-11	2.18604e-11
24.88	1.5684e-11	1.64781e-11		1.72242e-11	1.73389e-11		1.95186e-11	1.32032e-11	1.80458e-11	2.41039e-11	1.78748e-11	3.81851e-11	1.72438e-11	2.19619e-11	1.89815e-11	1.85844e-11	2.08387e-11	1.80871e-11	2.18613e-11
24.9	1.56769e-11	1.64777e-11		1.72236e-11	1.73394e-11		1.95421e-11	1.31998e-11	1.80533e-11	2.41034e-11	1.78789e-11	3.81757e-11	1.72457e-11	2.19584e-11	1.8978e-11	1.85826e-11	2.08495e-11	1.80919e-11	2.18574e-11
24.92	1.56903e-11	1.64804e-11		1.72292e-11	1.73382e-11		1.95437e-11	1.32058e-11	1.80468e-11	2.41001e-11	1.78786e-11	3.8199e-11	1.72354e-11	2.19597e-11	1.89798e-11	1.85893e-11	2.0832e-11	1.80979e-11	2.186e-11
24.94	1.56854e-11	1.64862e-11		1.72216e-11	1.73355e-11		1.95995e-11	1.31976e-11	1.80505e-11	2.41081e-11	1.78781e-11	3.81834e-11	1.72323e-11	2.19653e-11	1.89886e-11	1.85804e-11	2.08374e-11	1.80899e-11	2.18566e-11
24.96	1.56884e-11	1.64841e-11		1.72258e-11	1.73361e-11		1.95514e-11	1.32009e-11	1.80485e-11	2.41064e-11	1.78777e-11	3.81956e-11	1.72416e-11	2.19645e-11	1.89966e-11	1.85793e-11	2.08444e-11	1.80948e-11	2.18578e-11
24.98	1.56909e-11	1.64912e-11		1.72216e-11	1.73398e-11		1.95532e-11	1.32006e-11	1.80506e-11	2.41048e-11	1.78829e-11	3.81958e-11	1.72384e-11	2.19653e-11	1.89828e-11	1.85813e-11	2.08362e-11	1.80972e-11	2.18615e-11
25	1.56898e-11	1.64821e-11		1.72203e-11	1.73388e-11		1.9563e-11		1.80518e-11	2.41076e-11	1.78833e-11	3.81912e-11	1.72554e-11	2.19605e-11	1.89835e-11	1.85867e-11	2.08352e-11	1.80915e-11	2.18539e-11
25.02	1.56905e-11	1.64859e-11		1.72274e-11	1.73422e-11		1.95655e-11		1.80505e-11	2.41042e-11	1.78797e-11	3.81855e-11	1.72308e-11	2.19603e-11	1.89847e-11	1.85835e-11	2.08381e-11	1.80941e-11	2.18627e-11
25.04	1.56957e-11	1.64907e-11		1.72234e-11	1.734e-11		1.95826e-11		1.80509e-11	2.40975e-11	1.78819e-11	3.81879e-11	1.72342e-11	2.1964e-11	1.89816e-11	1.85844e-11	2.08435e-11	1.8086e-11	2.18536e-11
25.06	1.56979e-11	1.64825e-11		1.72217e-11	1.73333e-11		1.957e-11		1.80498e-11	2.41016e-11	1.78778e-11	3.81966e-11	1.72362e-11	2.19604e-11	1.89872e-11	1.85885e-11	2.08383e-11	1.80973e-11	2.18455e-11
25.08	1.5693e-11	1.64847e-11		1.7222e-11	1.7341e-11		1.95689e-11		1.80484e-11	2.41058e-11	1.78762e-11	3.81901e-11	1.72296e-11	2.19559e-11	1.89875e-11	1.85845e-11	2.08327e-11	1.80907e-11	2.18556e-11
25.1	1.57008e-11	1.64803e-11		1.72237e-11	1.73387e-11		1.95913e-11		1.80492e-11	2.41052e-11	1.78836e-11	3.81889e-11	1.72556e-11	2.19571e-11	1.89837e-11	1.85828e-11	2.08326e-11	1.80902e-11	2.18568e-11
25.12	1.57033e-11	1.64769e-11		1.72189e-11	1.73418e-11		1.9599e-11		1.80598e-11	2.41006e-11	1.78716e-11	3.8189e-11	1.72408e-11	2.19572e-11	1.89835e-11	1.85832e-11	2.08394e-11	1.80914e-11	2.18534e-11
25.14	1.57106e-11	1.64693e-11		1.72244e-11	1.73412e-11		1.95844e-11		1.80535e-11	2.41057e-11	1.78754e-11	3.81936e-11	1.724e-11	2.1965e-11	1.89829e-11	1.8583e-11	2.08384e-11	1.80882e-11	2.18532e-11
25.16	1.57105e-11	1.64764e-11		1.72227e-11	1.73411e-11		1.95793e-11		1.80474e-11	2.4109e-11	1.78704e-11	3.81886e-11	1.72501e-11	2.19624e-11	1.89746e-11	1.85772e-11	2.08401e-11	1.8091e-11	2.18577e-11
25.18	1.57124e-11	1.64786e-11		1.72221e-11	1.73457e-11		1.96043e-11		1.80536e-11	2.41072e-11	1.78792e-11	3.81909e-11	1.72559e-11	2.19642e-11	1.89853e-11	1.85809e-11	2.08263e-11	1.80858e-11	2.18577e-11
25.2	1.57116e-11	1.64881e-11		1.7225e-11	1.73348e-11		1.96129e-11		1.80489e-11	2.4109e-11	1.7873e-11	3.81884e-11	1.72363e-11	2.19617e-11	1.89877e-11	1.85877e-11	2.08402e-11	1.80861e-11	2.18638e-11
25.22	1.57226e-11	1.64787e-11		1.72195e-11	1.73385e-11		1.95908e-11		1.80471e-11	2.41072e-11	1.78703e-11	3.81952e-11	1.72357e-11	2.19529e-11	1.89807e-11	1.85806e-11	2.08342e-11	1.80906e-11	2.18603e-11
25.24	1.57053e-11	1.64832e-11		1.72223e-11	1.73349e-11		1.95573e-11		1.80539e-11	2.41044e-11	1.78734e-11	3.81935e-11	1.72368e-11	2.19529e-11	1.89822e-11	1.85843e-11	2.08416e-11	1.80954e-11	2.18583e-11
25.26	1.57126e-11	1.64956e-11		1.72217e-11	1.73439e-11		1.95917e-11		1.8052e-11	2.41012e-11	1.7873e-11	3.81975e-11	1.72392e-11	2.19683e-11	1.89861e-11	1.8583e-11	2.08322e-11	1.80943e-11	2.18533e-11
25.28	1.5708e-11	1.64788e-11		1.72235e-11	1.73365e-11		1.95807e-11		1.80537e-11	2.41089e-11	1.787e-11	3.81952e-11	1.72546e-11	2.19579e-11	1.89855e-11	1.85839e-11	2.08362e-11	1.80888e-11	2.18619e-11
25.3	1.57057e-11	1.64813e-11		1.72288e-11	1.7335e-11		1.96019e-11		1.80505e-11	2.41003e-11	1.78749e-11	3.81985e-11	1.72411e-11	2.19527e-11	1.8983e-11	1.85811e-11	2.08341e-11	1.80915e-11	2.18674e-11
25.32	1.57154e-11	1.64782e-11		1.72238e-11	1.73357e-11		1.95949e-11		1.80487e-11	2.41032e-11	1.78731e-11	3.81936e-11	1.72471e-11	2.19589e-11	1.898e-11	1.85837e-11	2.08376e-11	1.80927e-11	2.18604e-11
25.34	1.56979e-11	1.64761e-11		1.72249e-11	1.73373e-11		1.95591e-11		1.80482e-11	2.41037e-11	1.78751e-11	3.81971e-11	1.72484e-11	2.19615e-11	1.89834e-11	1.85825e-11	2.08382e-11	1.80939e-11	2.18651e-11
25.36	1.56958e-11	1.64823e-11		1.72271e-11	1.73374e-11		1.95736e-11		1.805e-11	2.41079e-11	1.78736e-11	3.81867e-11	1.72362e-11	2.19691e-11	1.89894e-11	1.85871e-11	2.08314e-11	1.80938e-11	2.186e-11
25.38	1.57002e-11	1.64794e-11		1.7223e-11	1.73318e-11		1.95614e-11		1.80522e-11	2.41006e-11	1.78726e-11	3.81997e-11	1.72341e-11	2.19611e-11	1.89836e-11	1.85876e-11	2.08356e-11	1.80946e-11	2.18578e-11
25.4	1.57021e-11	1.64779e-11		1.72245e-11	1.73403e-11		1.96001e-11		1.80562e-11	2.41105e-11	1.7874e-11	3.81947e-11	1.72313e-11	2.19617e-11	1.89791e-11	1.85846e-11	2.08307e-11	1.80946e-11	2.18563e-11
25.42	1.57016e-11	1.64834e-11		1.72228e-11	1.73439e-11		1.95946e-11		1.80476e-11	2.40972e-11	1.78719e-11	3.82031e-11	1.72359e-11	2.19602e-11	1.89843e-11	1.85856e-11	2.08374e-11	1.80883e-11	2.18611e-11
25.44	1.56966e-11	1.64737e-11		1.7222e-11	1.73394e-11		1.95714e-11		1.80504e-11	2.4103e-11	1.7876e-11	3.81938e-11	1.72361e-11	2.19616e-11	1.89836e-11	1.8587e-11	2.08372e-11	1.80938e-11	2.18555e-11
25.46	1.56945e-11	1.64789e-11		1.7223e-11	1.73415e-11		1.95955e-11		1.80506e-11	2.41023e-11	1.78754e-11	3.81838e-11	1.72256e-11	2.19553e-11	1.89862e-11	1.85854e-11	2.08374e-11	1.80952e-11	2.18563e-11
25.48	1.57092e-11	1.64817e-11		1.72191e-11	1.73359e-11		1.95796e-11		1.80531e-11	2.41048e-11	1.7872e-11	3.81868e-11	1.72433e-11	2.19576e-11	1.8985e-11	1.85853e-11	2.08308e-11	1.80913e-11	2.1851e-11
25.5	1.56987e-11	1.64816e-11		1.72228e-11	1.73385e-11		1.95499e-11		1.80498e-11	2.41062e-11	1.78707e-11	3.81924e-11	1.72411e-11	2.19585e-11	1.89876e-11	1.85845e-11	2.08306e-11	1.80904e-11	2.18455e-11
25.52	1.56931e-11	1.64718e-11		1.72234e-11	1.73336e-11		1.9557e-11		1.80548e-11	2.4105e-11	1.78692e-11	3.81924e-11	1.72593e-11	2.19574e-11	1.89835e-11	1.85852e-11	2.08324e-11	1.80861e-11	2.18502e-11
25.54	1.57041e-11	1.64763e-11		1.72254e-11	1.73376e-11		1.95919e-11		1.80525e-11	2.41033e-11	1.78674e-11	3.81839e-11	1.7254e-11	2.1953e-11	1.89854e-11	1.85856e-11	2.08313e-11	1.80983e-11	2.18574e-11
25.56	1.56913e-11	1.64763e-11		1.72239e-11	1.73357e-11		1.95768e-11		1.80528e-11	2.4103e-11	1.78787e-11	3.81822e-11	1.72376e-11	2.19593e-11	1.8986e-11	1.85864e-11	2.08367e-11	1.8097e-11	2.18571e-11
25.58	1.57059e-11	1.64734e-11		1.72215e-11	1.73331e-11		1.95645e-11		1.80488e-11	2.40986e-11	1.78743e-11	3.81973e-11	1.72353e-11	2.19585e-11	1.89778e-11	1.85805e-11	2.08369e-11	1.80906e-11	2.18682e-11
25.6	1.5696e-11	1.64679e-11		1.7228e-11	1.73349e-11		1.95717e-11		1.8053e-11	2.41087e-11	1.78796e-11	3.82041e-11	1.72369e-11	2.19588e-11	1.8988e-11	1.85881e-11	2.08337e-11	1.80966e-11	2.18601e-11
25.62	1.57051e-11	1.64739e-11		1.72245e-11	1.73355e-11		1.95912e-11		1.80479e-11	2.41051e-11	1.78748e-11	3.81883e-11	1.72265e-11	2.19572e-11	1.89847e-11	1.85824e-11	2.08318e-11	1.8096e-11	2.1864e-11
25.64	1.56972e-11	1.64695e-11		1.72255e-11	1.73368e-11		1.95854e-11		1.80547e-11	2.41042e-11	1.78694e-11	3.81876e-11	1.72262e-11	2.19611e-11	1.89904e-11	1.85847e-11	2.08367e-11	1.80878e-11	2.1862e-11
25.66	1.57026e-11	1.64694e-11		1.72259e-11	1.73362e-11		1.95654e-11		1.80493e-11	2.41028e-11	1.78693e-11	3.81934e-11	1.72389e-11	2.19569e-11	1.89798e-11	1.85859e-11	2.08342e-11	1.80947e-11	2.18575e-11
25.68	1.57112e-11	1.64741e-11		1.72255e-11	1.73396e-11		1.9586e-11		1.80548e-11	2.41047e-11	1.78747e-11	3.81904e-11	1.72455e-11	2.19642e-11	1.89851e-11	1.85862e-11	2.0835e-11	1.80839e-11	2.1858e-11
25.7	1.57038e-11	1.64719e-11		1.72287e-11	1.73314e-11		1.95975e-11		1.80543e-11	2.41052e-11	1.7871e-11	3.81911e-11	1.72647e-11	2.19639e-11	1.89857e-11	1.85863e-11	2.08288e-11	1.80936e-11	2.18542e-11
25.72	1.56979e-11	1.647e-11		1.72257e-11	1.73355e-11		1.95898e-11		1.80485e-11	2.41063e-11	1.78761e-11	3.81947e-11	1.72573e-11	2.19585e-11	1.89932e-11	1.85863e-11	2.08342e-11	1.8091e-11	2.18606e-11
25.74	1.56998e-11	1.64766e-11		1.72238e-11	1.73279e-11		1.96073e-11		1.80542e-11	2.41031e-11	1.78735e-11	3.81928e-11	1.72504e-11	2.19568e-11	1.89883e-11	1.85873e-11	2.08376e-11	1.80893e-11	2.18561e-11
25.76	1.56899e-11	1.64803e-11		1.72225e-11	1.73393e-11		1.95943e-11		1.80524e-11	2.40997e-11	1.78722e-11	3.81948e-11	1.72507e-11	2.19601e-11	1.8984e-11	1.85832e-11	2.0818e-11	1.80914e-11	2.1863e-11
25.78	1.57001e-11	1.64709e-11		1.72261e-11	1.73458e-11		1.96096e-11		1.80553e-11	2.41064e-11	1.78703e-11	3.81872e-11	1.72403e-11	2.1959e-11	1.89862e-11	1.85868e-11	2.0838e-11	1.80958e-11	2.18613e-11
25.8	1.57081e-11	1.64808e-11		1.72244e-11	1.73389e-11		1.9594e-11		1.80557e-11	2.41064e-11	1.78733e-11	3.81957e-11	1.72359e-11	2.19601e-11	1.89875e-11	1.85788e-11	2.08222e-11	1.80917e-11	2.18662e-11
25.82	1.57022e-11	1.64837e-11		1.72276e-11	1.73375e-11		1.95837e-11		1.80534e-11	2.41025e-11	1.78711e-11	3.81851e-11	1.72481e-11	2.19613e-11	1.89875e-11	1.85853e-11	2.08312e-11	1.8095e-11	2.1857e-11
25.84	1.56927e-11	1.64732e-11		1.7232e-11	1.73455e-11		1.96069e-11		1.80514e-11	2.41058e-11	1.78806e-11	3.81892e-11	1.72385e-11	2.19598e-11	1.89879e-11	1.85828e-11	2.08273e-11	1.80896e-11	2.1856e-11
25.86	1.56969e-11	1.64721e-11		1.72271e-11	1.73461e-11		1.95982e-11		1.80557e-11	2.41037e-11	1.78733e-11	3.82009e-11	1.72402e-11	2.19577e-11	1.89872e-11	1.85845e-11	2.08256e-11	1.80948e-11	2.18619e-11
25.88	1.57072e-11	1.64738e-11		1.72219e-11	1.73387e-11		1.95878e-11		1.80606e-11	2.41095e-11	1.78742e-11	3.81892e-11	1.72349e-11	2.19612e-11	1.89861e-11	1.8585e-11	2.08272e-11	1.80972e-11	2.18603e-11
25.9	1.57098e-11	1.648e-11		1.72224e-11	1.73352e-11		1.95778e-11		1.8055e-11	2.41068e-11	1.78701e-11	3.8189e-11	1.72395e-11	2.19662e-11	1.89879e-11	1.85805e-11	2.08228e-11	1.80956e-11	2.18611e-11
25.92	1.57173e-11	1.64746e-11		1.72254e-11	1.73404e-11		1.96162e-11		1.80557e-11	2.41081e-11	1.78713e-11	3.81844e-11	1.72344e-11	2.19634e-11	1.89883e-11	1.85816e-11	2.08293e-11	1.80961e-11	2.18631e-11
25.94	1.57112e-11	1.64697e-11		1.72283e-11	1.73319e-11		1.95878e-11		1.80572e-11	2.41043e-11	1.78749e-11	3.81901e-11	1.72307e-11	2.19611e-11	1.89846e-11	1.85818e-11	2.08288e-11	1.8095e-11	2.18602e-11
25.96	1.57178e-11	1.64759e-11		1.7225e-11	1.73451e-11		1.95963e-11		1.80538e-11	2.41002e-11	1.7875e-11	3.81894e-11	1.72223e-11	2.19575e-11	1.89861e-11	1.85843e-11	2.08222e-11	1.80959e-11	2.18616e-11
25.98	1.57171e-11	1.64853e-11		1.7227e-11	1.7335e-11		1.95955e-11		1.80507e-11	2.41048e-11	1.78671e-11	3.81829e-11	1.72456e-11	2.19592e-11	1.89876e-11	1.85872e-11	2.08218e-11	1.80906e-11	2.18588e-11
26	1.57079e-11	1.64801e-11		1.72262e-11	1.73385e-11		1.96023e-11		1.80571e-11	2.4106e-11	1.78735e-11	3.8195e-11	1.7245e-11	2.19601e-11	1.8978e-11	1.85834e-11	2.08265e-11	1.80922e-11	2.18605e-11
26.02	1.57078e-11	1.64676e-11		1.72264e-11	1.73371e-11		1.96189e-11		1.80567e-11	2.41071e-11	1.78699e-11	3.81947e-11	1.7238e-11	2.19661e-11	1.89816e-11	1.85875e-11	2.08233e-11	1.80993e-11	2.18541e-11
26.04	1.57138e-11	1.64694e-11		1.72325e-11	1.73428e-11		1.95892e-11		1.80556e-11	2.41034e-11	1.78718e-11	3.81812e-11	1.72349e-11	2.19582e-11	1.89893e-11	1.85894e-11	2.08246e-11	1.80914e-11	2.18565e-11
26.06	1.57179e-11	1.6476e-11		1.72271e-11	1.73375e-11		1.95974e-11		1.80499e-11	2.41049e-11	1.78782e-11	3.81843e-11	1.72173e-11	2.19564e-11	1.89842e-11	1.8586e-11	2.08273e-11	1.80943e-11	2.18659e-11
26.08	1.57183e-11	1.64789e-11		1.72272e-11	1.73434e-11		1.95977e-11		1.80509e-11	2.41077e-11	1.78775e-11	3.81895e-11	1.724e-11	2.19602e-11	1.8988e-11	1.85832e-11	2.08251e-11	1.80928e-11	2.18656e-11
26.1	1.57126e-11	1.64757e-11		1.72253e-11	1.73427e-11		1.95679e-11		1.80576e-11	2.41024e-11	1.78733e-11	3.81871e-11	1.72183e-11	2.19621e-11	1.89878e-11	1.85869e-11	2.08215e-11	1.80868e-11	2.18643e-11
26.12	1.57144e-11	1.64797e-11		1.72252e-11	1.73344e-11		1.9582e-11		1.8055e-11	2.41002e-11	1.78788e-11	3.81939e-11	1.72319e-11	2.19594e-11	1.89804e-11	1.85832e-11	2.08211e-11	1.80991e-11	2.18661e-11
26.14	1.57172e-11	1.64805e-11		1.72253e-11	1.73367e-11		1.96093e-11		1.80572e-11	2.41062e-11	1.78768e-11	3.81878e-11	1.72225e-11	2.19597e-11	1.89846e-11	1.85837e-11	2.08142e-11	1.80926e-11	2.186e-11
26.16	1.57109e-11	1.64873e-11		1.72305e-11	1.73393e-11		1.95867e-11		1.80523e-11	2.41145e-11	1.78776e-11	3.81938e-11	1.72195e-11	2.19615e-11	1.89879e-11	1.85853e-11	2.08257e-11	1.80989e-11	2.18671e-11
26.18	1.57228e-11	1.64763e-11		1.72297e-11	1.73396e-11		1.95669e-11		1.80586e-11	2.4111e-11	1.7874e-11	3.81886e-11	1.72399e-11	2.19609e-11	1.89865e-11	1.85808e-11	2.08185e-11	1.80902e-11	2.18687e-11
26.2	1.57129e-11	1.64721e-11		1.72326e-11	1.73387e-11		1.95948e-11		1.80584e-11	2.41032e-11	1.78745e-11	3.81903e-11	1.7213e-11	2.19552e-11	1.89875e-11	1.85848e-11	2.08162e-11	1.80899e-11	2.18585e-11
26.22	1.57215e-11	1.64724e-11		1.72266e-11	1.73445e-11		1.95889e-11		1.80597e-11	2.41114e-11	1.78767e-11	3.81902e-11	1.72151e-11	2.19597e-11	1.89841e-11	1.85871e-11	2.08084e-11	1.80933e-11	2.18594e-11
26.24	1.57113e-11	1.64732e-11		1.7227e-11	1.73364e-11		1.95838e-11		1.80545e-11	2.40962e-11	1.78781e-11	3.81848e-11	1.72117e-11	2.19555e-11	1.89841e-11	1.8588e-11	2.08193e-11	1.80934e-11	2.18638e-11
26.26	1.57112e-11	1.64734e-11		1.72272e-11	1.73375e-11		1.9566e-11		1.80583e-11	2.41046e-11	1.78736e-11	3.81933e-11	1.72182e-11	2.19585e-11	1.89848e-11	1.8591e-11	2.08152e-11	1.80888e-11	2.18648e-11
26.28	1.57186e-11	1.6486e-11		1.72291e-11	1.73374e-11		1.95745e-11		1.80531e-11	2.41081e-11	1.78737e-11	3.81856e-11	1.7224e-11	2.19647e-11	1.89841e-11	1.85831e-11	2.08201e-11	1.81016e-11	2.18647e-11
26.3	1.5713e-11	1.64849e-11		1.72302e-11	1.73404e-11		1.95927e-11		1.80527e-11	2.41069e-11	1.78708e-11	3.81892e-11	1.72295e-11	2.1962e-11	1.89866e-11	1.85875e-11	2.08154e-11	1.80928e-11	2.18648e-11
26.32	1.57169e-11	1.64839e-11		1.72254e-11	1.73386e-11		1.95979e-11		1.80573e-11	2.41025e-11	1.78759e-11	3.81884e-11	1.72236e-11	2.19646e-11	1.89753e-11	1.85901e-11	2.08181e-11	1.80935e-11	2.18647e-11
26.34	1.57177e-11	1.64883e-11		1.72242e-11	1.73308e-11		1.95775e-11		1.80541e-11	2.41054e-11	1.78754e-11	3.81869e-11	1.72187e-11	2.19595e-11	1.89753e-11	1.85875e-11	2.08145e-11	1.80954e-11	2.1868e-11
26.36	1.57157e-11	1.6479e-11		1.72266e-11	1.73409e-11		1.95685e-11		1.8054e-11	2.41119e-11	1.78759e-11	3.81824e-11	1.72199e-11	2.19597e-11	1.89911e-11	1.85859e-11	2.08121e-11	1.80916e-11	2.18718e-11
26.38	1.57178e-11	1.64814e-11		1.72224e-11	1.73385e-11		1.95851e-11		1.80504e-11	2.41066e-11	1.78757e-11	3.81951e-11	1.72192e-11	2.19595e-11	1.89827e-11	1.85863e-11	2.08092e-11	1.80916e-11	2.18588e-11
26.4	1.57216e-11	1.64784e-11		1.72238e-11	1.73463e-11		1.95683e-11		1.80519e-11	2.41071e-11	1.78701e-11	3.81923e-11	1.72203e-11	2.19618e-11	1.89875e-11	1.85888e-11	2.08089e-11	1.80978e-11	2.18626e-11
26.42	1.57185e-11	1.64797e-11		1.72267e-11	1.73433e-11		1.95965e-11		1.8061e-11	2.41038e-11	1.7879e-11	3.81815e-11	1.72334e-11	2.19622e-11	1.89902e-11	1.85843e-11	2.08115e-11	1.80918e-11	2.18657e-11
26.44	1.5723e-11	1.64741e-11		1.72279e-11	1.73403e-11		1.96096e-11		1.80575e-11	2.41111e-11	1.7866e-11	3.81852e-11	1.72216e-11	2.19618e-11	1.89814e-11	1.85884e-11	2.08171e-11	1.80929e-11	2.18618e-11
26.46	1.57247e-11	1.64807e-11		1.72309e-11	1.73367e-11		1.96163e-11		1.80586e-11	2.41128e-11	1.78746e-11	3.81954e-11	1.7237e-11	2.19625e-11	1.89814e-11	1.85818e-11	2.08217e-11	1.80954e-11	2.18564e-11
26.48	1.57223e-11	1.64827e-11		1.72295e-11	1.73409e-11		1.95982e-11		1.80607e-11	2.41057e-11	1.78766e-11	3.81854e-11	1.72304e-11	2.19696e-11	1.89809e-11	1.8585e-11	2.08148e-11	1.8097e-11	2.18604e-11
26.5	1.57177e-11	1.64806e-11		1.72314e-11	1.73341e-11		1.95885e-11		1.80544e-11	2.411e-11	1.78698e-11	3.81902e-11	1.72343e-11	2.19644e-11	1.89894e-11	1.85855e-11	2.08118e-11	1.80959e-11	2.18618e-11
26.52	1.57004e-11	1.6484e-11		1.72276e-11	1.73427e-11		1.95733e-11		1.80568e-11	2.41078e-11	1.78701e-11	3.81853e-11	1.72355e-11	2.19642e-11	1.89789e-11	1.85847e-11	2.08092e-11	1.80963e-11	2.18629e-11
26.54	1.57047e-11	1.64824e-11		1.72284e-11	1.73379e-11		1.96074e-11		1.80512e-11	2.41034e-11	1.78741e-11	3.81876e-11	1.72335e-11	2.19651e-11	1.89927e-11	1.85823e-11	2.08164e-11	1.80937e-11	2.18556e-11
26.56	1.5701e-11	1.64818e-11		1.72327e-11	1.73418e-11		1.9595e-11		1.80627e-11	2.41079e-11	1.7875e-11	3.81979e-11	1.72345e-11	2.19661e-11	1.89816e-11	1.85848e-11	2.08097e-11	1.80978e-11	2.18613e-11
26.58	1.57126e-11	1.64863e-11		1.72279e-11	1.73416e-11		1.96003e-11		1.80561e-11	2.4105e-11	1.78735e-11	3.81883e-11	1.7221e-11	2.19668e-11	1.89827e-11	1.85865e-11	2.08207e-11	1.80965e-11	2.18703e-11
26.6	1.57148e-11	1.64904e-11		1.72321e-11	1.73355e-11		1.95806e-11		1.8058e-11	2.41006e-11	1.78746e-11	3.81859e-11	1.72298e-11	2.19621e-11	1.89895e-11	1.85909e-11	2.08157e-11	1.81028e-11	2.18597e-11
26.62	1.57088e-11	1.64935e-11		1.72304e-11	1.73421e-11		1.96178e-11		1.80498e-11	2.41032e-11	1.78734e-11	3.81922e-11	1.72276e-11	2.19634e-11	1.89838e-11	1.85893e-11	2.0813e-11	1.81027e-11	2.18639e-11
26.64	1.57069e-11	1.6481e-11		1.72242e-11	1.7344e-11		1.96071e-11		1.80562e-11	2.41065e-11	1.78683e-11	3.81828e-11	1.72371e-11	2.1962e-11	1.89835e-11	1.85825e-11	2.08163e-11	1.81003e-11	2.18619e-11
26.66	1.57065e-11	1.64835e-11		1.72331e-11	1.73444e-11		1.95929e-11		1.80535e-11	2.41077e-11	1.78737e-11	3.81902e-11	1.72243e-11	2.19653e-11	1.8992e-11	1.85876e-11	2.08147e-11	1.80927e-11	2.18693e-11
26.68	1.57109e-11	1.6479e-11		1.72289e-11	1.7341e-11		1.95592e-11		1.80541e-11	2.41068e-11	1.78709e-11	3.81883e-11	1.72332e-11	2.19605e-11	1.89816e-11	1.85857e-11	2.08165e-11	1.80968e-11	2.18639e-11
26.7	1.5716e-11	1.64738e-11		1.72321e-11	1.73457e-11		1.96023e-11		1.80568e-11	2.41035e-11	1.7871e-11	3.81884e-11	1.72448e-11	2.19585e-11	1.89876e-11	1.85908e-11	2.08127e-11	1.81046e-11	2.18576e-11
26.72	1.57207e-11	1.64768e-11		1.72253e-11	1.73407e-11		1.96056e-11		1.80495e-11	2.41083e-11	1.78703e-11	3.81885e-11	1.72261e-11	2.19606e-11	1.89905e-11	1.85852e-11	2.081e-11	1.8098e-11	2.18568e-11
26.74	1.5709e-11	1.64818e-11		1.72288e-11	1.73395e-11		1.95648e-11		1.80541e-11	2.41082e-11	1.78795e-11	3.81921e-11	1.72303e-11	2.19674e-11	1.89811e-11	1.85893e-11	2.08126e-11	1.80976e-11	2.18594e-11
26.76	1.57123e-11	1.64861e-11		1.7227e-11	1.7342e-11		1.96046e-11		1.80614e-11	2.41047e-11	1.78704e-11	3.81861e-11	1.72351e-11	2.19533e-11	1.89836e-11	1.85842e-11	2.08163e-11	1.81006e-11	2.18686e-11
26.78	1.57099e-11	1.64855e-11		1.7233e-11	1.73423e-11		1.95907e-11		1.80553e-11	2.41132e-11	1.78787e-11	3.81821e-11	1.72292e-11	2.19636e-11	1.8984e-11	1.85858e-11	2.08091e-11	1.81051e-11	2.18639e-11
26.8	1.57067e-11	1.64862e-11		1.72264e-11	1.73403e-11		1.95491e-11		1.80537e-11	2.41061e-11	1.78733e-11	3.81907e-11	1.72432e-11	2.19565e-11	1.89813e-11	1.8585e-11	2.08112e-11	1.81006e-11	2.18631e-11
26.82	1.5715e-11	1.64833e-11		1.72271e-11	1.73374e-11		1.95947e-11		1.80593e-11	2.41069e-11	1.78736e-11	3.81833e-11	1.72355e-11	2.19656e-11	1.89768e-11	1.85867e-11	2.08189e-11	1.80955e-11	2.18642e-11
26.84	1.57189e-11	1.64779e-11		1.72342e-11	1.73424e-11		1.9601e-11		1.80567e-11	2.4103e-11	1.78763e-11	3.81879e-11	1.72388e-11	2.19622e-11	1.89742e-11	1.85862e-11	2.08048e-11	1.80995e-11	2.18703e-11
26.86	1.57124e-11	1.64919e-11		1.72332e-11	1.73407e-11		1.96368e-11		1.80593e-11	2.41133e-11	1.78756e-11	3.81804e-11	1.72287e-11	2.19652e-11	1.89862e-11	1.85801e-11	2.08115e-11	1.81024e-11	2.18631e-11
26.88	1.57059e-11	1.64892e-11		1.7228e-11	1.73454e-11		1.96186e-11		1.80552e-11	2.41012e-11	1.78721e-11	3.81865e-11	1.72203e-11	2.19605e-11	1.89887e-11	1.85864e-11	2.0809e-11	1.80971e-11	2.18614e-11
26.9	1.57063e-11	1.6484e-11		1.72346e-11	1.73362e-11		1.96147e-11		1.80584e-11	2.40068e-11	1.78733e-11	3.81901e-11	1.72271e-11	2.19618e-11	1.89788e-11	1.85837e-11	2.08116e-11	1.80947e-11	2.18647e-11
26.92	1.56961e-11	1.64816e-11		1.72312e-11	1.73454e-11		1.96073e-11		1.80625e-11	2.38392e-11	1.78796e-11	3.81949e-11	1.72457e-11	2.19609e-11	1.89852e-11	1.85881e-11	2.08143e-11	1.81023e-11	2.18586e-11
26.94	1.56906e-11	1.64872e-11		1.72348e-11	1.73391e-11		1.96106e-11		1.80561e-11	2.37598e-11	1.78742e-11	3.81893e-11	1.723e-11	2.19662e-11	1.89764e-11	1.8588e-11	2.08139e-11	1.81013e-11	2.1865e-11
26.96	1.56953e-11	1.64866e-11		1.72281e-11	1.73382e-11		1.95874e-11		1.80568e-11	2.37682e-11	1.78732e-11	3.81869e-11	1.72152e-11	2.19572e-11	1.89749e-11	1.85863e-11	2.08184e-11	1.81038e-11	2.18665e-11
26.98	1.57058e-11	1.64895e-11		1.72332e-11	1.73359e-11		1.9606e-11		1.80637e-11	2.37602e-11	1.78738e-11	3.81908e-11	1.72338e-11	2.19589e-11	1.89882e-11	1.8589e-11	2.0809e-11	1.80995e-11	2.18664e-11
27	1.57056e-11	1.64908e-11		1.72286e-11	1.73412e-11		1.96036e-11		1.80565e-11	2.37599e-11	1.78682e-11	3.81894e-11	1.72339e-11	2.19625e-11	1.89849e-11	1.85864e-11	2.08102e-11	1.8099e-11	2.18706e-11
27.02	1.56967e-11	1.64805e-11		1.72346e-11	1.73399e-11		1.96019e-11		1.80562e-11	2.37676e-11	1.78723e-11	3.81853e-11	1.72347e-11	2.1963e-11	1.89836e-11	1.8583e-11	2.08205e-11	1.80964e-11	2.18633e-11
27.04	1.56923e-11	1.64853e-11		1.72341e-11	1.7347e-11		1.95705e-11		1.80628e-11	2.3771e-11	1.78732e-11	3.81899e-11	1.72224e-11	2.19634e-11	1.89842e-11	1.85808e-11	2.08166e-11	1.80992e-11	2.18631e-11
27.06	1.57022e-11	1.64913e-11		1.72288e-11	1.73379e-11		1.9597e-11		1.80579e-11	2.37804e-11	1.78713e-11	3.81826e-11	1.72401e-11	2.19621e-11	1.89832e-11	1.85873e-11	2.08042e-11	1.81001e-11	2.18595e-11
27.08	1.5702e-11	1.64938e-11		1.72321e-11	1.73414e-11		1.96075e-11		1.80553e-11	2.37796e-11	1.78736e-11	3.81857e-11	1.72362e-11	2.19629e-11	1.89796e-11	1.85836e-11	2.08065e-11	1.81013e-11	2.18557e-11
27.1	1.57076e-11	1.64894e-11		1.7237e-11	1.7344e-11		1.96138e-11		1.8059e-11	2.37824e-11	1.78707e-11	3.81863e-11	1.72343e-11	2.19597e-11	1.89872e-11	1.85845e-11	2.08157e-11	1.8094e-11	2.18582e-11
27.12	1.56993e-11	1.64777e-11		1.72387e-11	1.73457e-11		1.96148e-11		1.8055e-11	2.37915e-11	1.78682e-11	3.81875e-11	1.72218e-11	2.19624e-11	1.89834e-11	1.85884e-11	2.08127e-11	1.81024e-11	2.186e-11
27.14	1.56955e-11	1.64859e-11		1.7233e-11	1.73422e-11		1.95831e-11		1.80591e-11	2.37836e-11	1.78745e-11	3.81901e-11	1.72279e-11	2.19589e-11	1.89797e-11	1.85868e-11	2.08196e-11	1.8103e-11	2.18649e-11
27.16	1.56942e-11	1.64858e-11		1.72327e-11	1.73428e-11		1.95942e-11		1.80608e-11	2.37889e-11	1.7872e-11	3.81903e-11	1.72189e-11	2.19587e-11	1.89827e-11	1.85915e-11	2.08164e-11	1.80969e-11	2.18617e-11
27.18	1.57015e-11	1.64904e-11		1.72317e-11	1.73402e-11		1.95958e-11		1.80592e-11	2.3783e-11	1.78682e-11	3.81879e-11	1.72142e-11	2.19572e-11	1.89845e-11	1.8584e-11	2.08165e-11	1.8102e-11	2.18657e-11
27.2	1.57059e-11	1.6498e-11		1.72332e-11	1.73397e-11		1.95946e-11		1.80639e-11	2.3783e-11	1.78708e-11	3.81819e-11	1.72197e-11	2.19579e-11	1.89809e-11	1.85794e-11	2.08143e-11	1.81047e-11	2.18632e-11
27.22	1.57075e-11	1.64802e-11		1.72299e-11	1.73438e-11		1.95939e-11		1.80651e-11	2.37833e-11	1.78705e-11	3.81904e-11	1.72238e-11	2.19678e-11	1.8974e-11	1.85895e-11	2.08117e-11	1.80969e-11	2.18672e-11
27.24	1.57132e-11	1.64814e-11		1.72297e-11	1.73363e-11		1.9607e-11		1.80604e-11	2.37782e-11	1.78689e-11	3.81958e-11	1.7233e-11	2.19604e-11	1.8989e-11	1.85879e-11	2.08217e-11	1.80976e-11	2.18677e-11
27.26	1.57156e-11	1.64921e-11		1.72334e-11	1.73464e-11		1.95912e-11		1.80559e-11	2.37739e-11	1.78696e-11	3.81856e-11	1.72046e-11	2.19643e-11	1.89765e-11	1.85888e-11	2.08091e-11	1.81025e-11	2.18659e-11
27.28	1.5711e-11	1.64854e-11		1.72332e-11	1.73442e-11		1.96272e-11		1.80606e-11	2.37742e-11	1.78698e-11	3.81849e-11	1.72213e-11	2.19634e-11	1.89882e-11	1.85825e-11	2.0815e-11	1.81067e-11	2.18639e-11
27.3	1.57199e-11	1.64855e-11		1.72299e-11	1.73474e-11		1.95939e-11		1.80577e-11	2.37745e-11	1.78706e-11	3.81863e-11	1.72122e-11	2.19682e-11	1.89839e-11	1.85854e-11	2.08091e-11	1.80998e-11	2.18607e-11
27.32	1.57106e-11	1.6487e-11		1.72352e-11	1.73364e-11		1.95883e-11		1.80572e-11	2.37817e-11	1.7867e-11	3.81865e-11	1.72216e-11	2.19575e-11	1.89781e-11	1.85857e-11	2.082e-11	1.80949e-11	2.1868e-11
27.34	1.57173e-11	1.64884e-11		1.72295e-11	1.73407e-11		1.96041e-11		1.80631e-11	2.37722e-11	1.78688e-11	3.81777e-11	1.7223e-11	2.19579e-11	1.89834e-11	1.85841e-11	2.08173e-11	1.81002e-11	2.18638e-11
27.36	1.57107e-11	1.64891e-11		1.72348e-11	1.73369e-11		1.96164e-11		1.80611e-11	2.37754e-11	1.78731e-11	3.81903e-11	1.72015e-11	2.19603e-11	1.89817e-11	1.85902e-11	2.08061e-11	1.81029e-11	2.1876e-11
27.38	1.5716e-11	1.64818e-11		1.72331e-11	1.73406e-11		1.96237e-11		1.80669e-11	2.37697e-11	1.78772e-11	3.81942e-11	1.72112e-11	2.19567e-11	1.8981e-11	1.85925e-11	2.08191e-11	1.81003e-11	2.18709e-11
27.4	1.57155e-11	1.64808e-11		1.72287e-11	1.73422e-11		1.96234e-11		1.80662e-11	2.37711e-11	1.78722e-11	3.81828e-11	1.71954e-11	2.19542e-11	1.89771e-11	1.85864e-11	2.08215e-11	1.81014e-11	2.18672e-11
27.42	1.57225e-11	1.64802e-11		1.72303e-11	1.73424e-11		1.96089e-11		1.80602e-11	2.37655e-11	1.78728e-11	3.81909e-11	1.7198e-11	2.19639e-11	1.89847e-11	1.85876e-11	2.08199e-11	1.81049e-11	2.186e-11
27.44	1.57259e-11	1.64793e-11		1.72356e-11	1.73437e-11		1.9608e-11		1.80575e-11	2.37686e-11	1.7877e-11	3.81806e-11	1.71936e-11	2.19549e-11	1.89863e-11	1.85848e-11	2.08135e-11	1.81045e-11	2.18599e-11
27.46	1.57257e-11	1.6485e-11		1.72314e-11	1.73431e-11		1.96167e-11		1.80597e-11	2.37628e-11	1.78728e-11	3.81787e-11	1.72121e-11	2.19563e-11	1.89843e-11	1.85866e-11	2.08182e-11	1.81025e-11	2.1865e-11
27.48	1.57038e-11	1.64867e-11		1.72368e-11	1.73442e-11		1.95844e-11		1.80643e-11	2.37647e-11	1.78761e-11	3.81968e-11	1.72016e-11	2.19696e-11	1.89812e-11	1.85872e-11	2.08174e-11	1.81089e-11	2.18665e-11
27.5	1.57107e-11	1.6488e-11		1.72306e-11	1.73401e-11		1.9611e-11		1.80594e-11	2.37636e-11	1.78743e-11	3.81809e-11	1.72313e-11	2.19625e-11	1.89837e-11	1.85859e-11	2.08139e-11	1.81046e-11	2.18715e-11
27.52	1.57084e-11	1.64802e-11		1.7235e-11	1.73469e-11		1.96013e-11		1.80665e-11	2.37602e-11	1.78725e-11	3.81778e-11	1.72105e-11	2.19584e-11	1.89807e-11	1.85862e-11	2.08132e-11	1.8104e-11	2.18668e-11
27.54	1.57154e-11	1.64883e-11		1.72308e-11	1.7339e-11		1.95995e-11		1.80564e-11	2.37589e-11	1.78754e-11	3.81895e-11	1.72263e-11	2.19634e-11	1.89818e-11	1.85866e-11	2.08174e-11	1.81081e-11	2.18672e-11
27.56	1.57045e-11	1.64884e-11		1.72328e-11	1.73457e-11		1.96086e-11		1.80628e-11	2.37591e-11	1.7873e-11	3.81814e-11	1.72117e-11	2.1963e-11	1.89856e-11	1.85855e-11	2.08158e-11	1.81068e-11	2.18672e-11
27.58	1.57101e-11	1.64802e-11		1.72297e-11	1.73356e-11		1.96141e-11		1.8064e-11	2.37567e-11	1.78757e-11	3.81725e-11	1.72044e-11	2.19651e-11	1.89797e-11	1.85861e-11	2.08144e-11	1.81066e-11	2.1861e-11
27.6	1.57152e-11	1.64846e-11		1.72309e-11	1.73398e-11		1.95926e-11		1.80613e-11	2.37552e-11	1.78699e-11	3.818e-11	1.72126e-11	2.19607e-11	1.89746e-11	1.85856e-11	2.08219e-11	1.80978e-11	2.18623e-11
27.62	1.57055e-11	1.64906e-11		1.72327e-11	1.73447e-11		1.96024e-11		1.80578e-11	2.37529e-11	1.78722e-11	3.81907e-11	1.71995e-11	2.19693e-11	1.89834e-11	1.8587e-11	2.08045e-11	1.81048e-11	2.18602e-11
27.64	1.57054e-11	1.64874e-11		1.72296e-11	1.7342e-11		1.95875e-11		1.80571e-11	2.37564e-11	1.78698e-11	3.81857e-11	1.71979e-11	2.19691e-11	1.89863e-11	1.85849e-11	2.08144e-11	1.81073e-11	2.18677e-11
27.66	1.5714e-11	1.64817e-11		1.72338e-11	1.73412e-11		1.95741e-11		1.80638e-11	2.37579e-11	1.78685e-11	3.81895e-11	1.72249e-11	2.19658e-11	1.8992e-11	1.85852e-11	2.08157e-11	1.81049e-11	2.18623e-11
27.68	1.57253e-11	1.64864e-11		1.72337e-11	1.73443e-11		1.9583e-11		1.80603e-11	2.37543e-11	1.78748e-11	3.81833e-11	1.72096e-11	2.1963e-11	1.89845e-11	1.85862e-11	2.0817e-11	1.81011e-11	2.18702e-11
27.7	1.5722e-11	1.64926e-11		1.72351e-11	1.73362e-11		1.96099e-11		1.80607e-11	2.37581e-11	1.78742e-11	3.8187e-11	1.7202e-11	2.19568e-11	1.89847e-11	1.85839e-11	2.0817e-11	1.81012e-11	2.18613e-11
27.72	1.57179e-11	1.6483e-11		1.72363e-11	1.73401e-11		1.96091e-11		1.80598e-11	2.37506e-11	1.78693e-11	3.81915e-11	1.72057e-11	2.19597e-11	1.89751e-11	1.85921e-11	2.08215e-11	1.81014e-11	2.18631e-11
27.74	1.57258e-11	1.64922e-11		1.72309e-11	1.73378e-11		1.96117e-11		1.80653e-11	2.37533e-11	1.78723e-11	3.81845e-11	1.72107e-11	2.19639e-11	1.89778e-11	1.85873e-11	2.08241e-11	1.81056e-11	2.18585e-11
27.76	1.57174e-11	1.64748e-11		1.72343e-11	1.73432e-11		1.95926e-11		1.80644e-11	2.37525e-11	1.78721e-11	3.81878e-11	1.7218e-11	2.1964e-11	1.89863e-11	1.8587e-11	2.08201e-11	1.81033e-11	2.18569e-11
27.78	1.57206e-11	1.64791e-11		1.72361e-11	1.73423e-11		1.95789e-11		1.80611e-11	2.3743e-11	1.78688e-11	3.81881e-11	1.72108e-11	2.19683e-11	1.89835e-11	1.85859e-11	2.08174e-11	1.81089e-11	2.18534e-11
27.8	1.57132e-11	1.64785e-11		1.72333e-11	1.73467e-11		1.96075e-11		1.80592e-11	2.37492e-11	1.78777e-11	3.8185e-11	1.72107e-11	2.19643e-11	1.89805e-11	1.8588e-11	2.08127e-11	1.81049e-11	2.18521e-11
27.82	1.57182e-11	1.64741e-11		1.7235e-11	1.73446e-11		1.95727e-11		1.80611e-11	2.3746e-11	1.7871e-11	3.81804e-11	1.721e-11	2.19604e-11	1.89791e-11	1.85877e-11	2.08076e-11	1.8107e-11	2.18573e-11
27.84	1.57193e-11	1.64775e-11		1.72311e-11	1.73398e-11		1.96058e-11		1.80634e-11	2.37509e-11	1.78715e-11	3.81863e-11	1.72212e-11	2.19649e-11	1.8977e-11	1.85886e-11	2.08124e-11	1.81114e-11	2.18605e-11
27.86	1.57201e-11	1.64868e-11		1.72377e-11	1.73432e-11		1.95958e-11		1.80592e-11	2.37445e-11	1.78743e-11	3.81854e-11	1.72252e-11	2.19644e-11	1.89861e-11	1.85873e-11	2.08218e-11	1.81101e-11	2.18662e-11
27.88	1.57102e-11	1.64846e-11		1.72334e-11	1.73396e-11		1.95536e-11		1.80593e-11	2.37438e-11	1.78723e-11	3.81827e-11	1.72373e-11	2.19653e-11	1.8983e-11	1.85875e-11	2.08078e-11	1.81096e-11	2.18676e-11
27.9	1.57153e-11	1.64753e-11		1.72345e-11	1.73438e-11		1.95906e-11		1.80589e-11	2.37483e-11	1.78685e-11	3.81918e-11	1.72254e-11	2.19615e-11	1.8977e-11	1.85935e-11	2.08168e-11	1.81089e-11	2.18614e-11
27.92	1.57269e-11	1.6483e-11		1.72337e-11	1.73394e-11		1.9599e-11		1.80597e-11	2.37398e-11	1.78718e-11	3.81798e-11	1.72376e-11	2.19615e-11	1.89729e-11	1.85862e-11	2.08206e-11	1.81116e-11	2.18653e-11
27.94	1.57204e-11	1.64792e-11		1.72344e-11	1.73426e-11		1.95985e-11		1.80606e-11	2.37479e-11	1.78693e-11	3.81873e-11	1.72267e-11	2.19634e-11	1.89779e-11	1.85892e-11	2.08134e-11	1.81141e-11	2.18541e-11
27.96	1.57146e-11	1.64805e-11		1.72319e-11	1.73427e-11		1.95872e-11		1.80646e-11	2.37397e-11	1.7872e-11	3.81789e-11	1.72307e-11	2.19643e-11	1.89799e-11	1.85854e-11	2.08091e-11	1.81095e-11	2.18619e-11
27.98	1.57115e-11	1.64817e-11		1.72304e-11	1.73435e-11		1.9593e-11		1.80591e-11	2.37463e-11	1.78755e-11	3.81748e-11	1.72342e-11	2.19584e-11	1.89755e-11	1.85876e-11	2.08178e-11	1.81164e-11	2.18678e-11
28	1.57181e-11	1.64855e-11		1.72279e-11	1.73394e-11		1.95962e-11		1.80646e-11	2.3742e-11	1.78693e-11	3.81823e-11	1.72386e-11	2.19603e-11	1.89755e-11	1.85856e-11	2.08168e-11	1.81186e-11	2.1855e-11
28.02	1.57189e-11	1.64698e-11		1.72381e-11	1.73407e-11		1.95842e-11			2.37463e-11	1.78699e-11	3.81778e-11	1.7224e-11	2.19587e-11	1.89776e-11	1.85859e-11	2.0814e-11	1.8104e-11	2.18529e-11
28.04	1.57097e-11	1.64709e-11		1.7239e-11	1.73446e-11		1.96015e-11			2.37396e-11	1.78705e-11	3.81821e-11	1.72233e-11	2.19604e-11	1.89845e-11	1.85879e-11	2.08179e-11	1.81079e-11	2.18642e-11
28.06	1.5713e-11	1.64799e-11		1.7239e-11	1.73397e-11		1.96126e-11			2.37418e-11	1.78651e-11	3.81818e-11	1.72194e-11	2.19663e-11	1.89814e-11	1.85863e-11	2.08085e-11	1.81108e-11	2.18623e-11
28.08	1.57124e-11	1.6467e-11		1.72352e-11	1.73434e-11		1.96371e-11			2.37429e-11	1.78729e-11	3.81762e-11	1.72097e-11	2.1957e-11	1.89823e-11	1.85875e-11	2.08099e-11	1.81103e-11	2.18645e-11
28.1	1.57118e-11	1.64672e-11		1.72358e-11	1.73389e-11		1.96034e-11			2.37459e-11	1.78763e-11	3.81767e-11	1.72252e-11	2.19576e-11	1.89777e-11	1.85906e-11	2.08158e-11	1.81104e-11	2.18677e-11
28.12	1.57198e-11	1.64833e-11		1.72309e-11	1.73428e-11		1.96027e-11			2.37382e-11	1.78714e-11	3.81758e-11	1.72182e-11	2.19571e-11	1.89804e-11	1.85916e-11	2.08114e-11	1.81098e-11	2.18683e-11
28.14	1.57163e-11	1.64743e-11		1.72375e-11	1.73402e-11		1.95979e-11			2.37432e-11	1.78753e-11	3.81802e-11	1.72269e-11	2.19597e-11	1.89817e-11	1.85909e-11	2.08164e-11	1.81142e-11	2.1865e-11
28.16	1.5717e-11	1.647e-11		1.72306e-11	1.73448e-11		1.95882e-11			2.37404e-11	1.78737e-11	3.81881e-11	1.7229e-11	2.19657e-11	1.8988e-11	1.85841e-11	2.08144e-11	1.81149e-11	2.18681e-11
28.18	1.57143e-11	1.64795e-11		1.72315e-11	1.73399e-11		1.96054e-11			2.3742e-11	1.78766e-11	3.81955e-11	1.72189e-11	2.19667e-11	1.89847e-11	1.85862e-11	2.08194e-11	1.81122e-11	2.18665e-11
28.2	1.57252e-11	1.64786e-11		1.72373e-11	1.73415e-11		1.95834e-11			2.3738e-11	1.78727e-11	3.81836e-11	1.72294e-11	2.19644e-11	1.89857e-11	1.85925e-11	2.08165e-11	1.81115e-11	2.18634e-11
28.22	1.57121e-11	1.64694e-11		1.72359e-11	1.73431e-11		1.96061e-11			2.37414e-11	1.78734e-11	3.81819e-11	1.72246e-11	2.19631e-11	1.89862e-11	1.85848e-11	2.08185e-11	1.81134e-11	2.18677e-11
28.24	1.57151e-11	1.64804e-11		1.72314e-11	1.73433e-11		1.96032e-11			2.37463e-11	1.78724e-11	3.81827e-11	1.72216e-11	2.19606e-11	1.89807e-11	1.8587e-11	2.08115e-11	1.81135e-11	2.18673e-11
28.26	1.57127e-11	1.64733e-11		1.72322e-11	1.73448e-11		1.95954e-11			2.37396e-11	1.78684e-11	3.81869e-11	1.72356e-11	2.19647e-11	1.89838e-11	1.85857e-11	2.08196e-11	1.81136e-11	2.18598e-11
28.28	1.57179e-11	1.64825e-11		1.72352e-11	1.73426e-11		1.96014e-11			2.37449e-11	1.78862e-11	3.81932e-11	1.72194e-11	2.19662e-11	1.89834e-11	1.85858e-11	2.08121e-11	1.81108e-11	2.18684e-11
28.3	1.57176e-11	1.64726e-11		1.72366e-11	1.73418e-11		1.95964e-11			2.37395e-11	1.78797e-11	3.81855e-11	1.72249e-11	2.19606e-11	1.89914e-11	1.85852e-11	2.08183e-11	1.81142e-11	2.18632e-11
28.32	1.57104e-11	1.6476e-11		1.72376e-11	1.73434e-11		1.96007e-11			2.37456e-11	1.78513e-11	3.81782e-11	1.72067e-11	2.19627e-11	1.89881e-11	1.85908e-11	2.08079e-11	1.81126e-11	2.18654e-11
28.34	1.5718e-11	1.64807e-11		1.72322e-11	1.73386e-11		1.9614e-11			2.37422e-11	1.77209e-11	3.81932e-11	1.72101e-11	2.1958e-11	1.89813e-11	1.85846e-11	2.08158e-11	1.81199e-11	2.18621e-11
28.36	1.57162e-11	1.64794e-11		1.7242e-11	1.73399e-11		1.95997e-11			2.37386e-11	1.75734e-11	3.81865e-11	1.72343e-11	2.19554e-11	1.89748e-11	1.85898e-11	2.08183e-11	1.8112e-11	2.18661e-11
28.38	1.57159e-11	1.64741e-11		1.72344e-11	1.73442e-11		1.96152e-11			2.37436e-11	1.75436e-11	3.81915e-11	1.72332e-11	2.19638e-11	1.89777e-11	1.85865e-11	2.08156e-11	1.81166e-11	2.18617e-11
28.4	1.57167e-11	1.64832e-11		1.72434e-11	1.73441e-11		1.95991e-11			2.37395e-11	1.75334e-11	3.81836e-11	1.72172e-11	2.1959e-11	1.8984e-11	1.85901e-11	2.08204e-11	1.81039e-11	2.18632e-11
28.42	1.57188e-11	1.64772e-11		1.72374e-11	1.73429e-11		1.95968e-11			2.37369e-11	1.75359e-11	3.81882e-11	1.72172e-11	2.19607e-11	1.89767e-11	1.85895e-11	2.08174e-11	1.81136e-11	2.18545e-11
28.44	1.57094e-11	1.64847e-11		1.7238e-11	1.7341e-11		1.96165e-11			2.37347e-11	1.75414e-11	3.81899e-11	1.72192e-11	2.19609e-11	1.89854e-11	1.85876e-11	2.08138e-11	1.81132e-11	2.1854e-11
28.46	1.5712e-11	1.64771e-11		1.72402e-11	1.73463e-11		1.95891e-11			2.37401e-11	1.75467e-11	3.81744e-11	1.72026e-11	2.19614e-11	1.89789e-11	1.85908e-11	2.08114e-11	1.81122e-11	2.18535e-11
28.48	1.57141e-11	1.64866e-11		1.72383e-11	1.73451e-11		1.95977e-11			2.37423e-11	1.75464e-11	3.8181e-11	1.72195e-11	2.19615e-11	1.89858e-11	1.85866e-11	2.08162e-11	1.81164e-11	2.18637e-11
28.5	1.57184e-11	1.64843e-11		1.72353e-11	1.73398e-11		1.95962e-11			2.37337e-11	1.756e-11	3.81817e-11	1.72456e-11	2.19628e-11	1.8993e-11	1.85913e-11	2.08134e-11	1.81123e-11	2.18562e-11
28.52	1.57118e-11	1.64796e-11		1.72374e-11	1.73423e-11		1.96005e-11			2.3741e-11	1.75571e-11	3.8184e-11	1.72468e-11	2.19651e-11	1.89935e-11	1.85884e-11	2.08127e-11	1.81175e-11	2.18663e-11
28.54	1.57123e-11	1.64769e-11		1.72399e-11	1.73373e-11		1.96069e-11			2.3736e-11	1.75603e-11	3.8189e-11	1.72264e-11	2.19632e-11	1.89761e-11	1.85916e-11	2.08245e-11	1.81158e-11	2.18643e-11
28.56	1.5725e-11	1.64846e-11		1.72379e-11	1.73465e-11		1.95883e-11			2.37393e-11	1.75649e-11	3.8187e-11	1.72206e-11	2.19612e-11	1.89893e-11	1.85837e-11	2.08103e-11	1.8115e-11	2.18688e-11
28.58	1.57195e-11	1.64801e-11		1.72367e-11	1.7341e-11		1.9607e-11			2.37382e-11	1.75612e-11	3.81956e-11	1.72342e-11	2.19623e-11	1.89855e-11	1.85879e-11	2.08116e-11	1.81145e-11	2.18642e-11
28.6	1.57293e-11	1.64817e-11		1.72333e-11	1.7339e-11		1.95903e-11			2.37357e-11	1.75619e-11	3.81817e-11	1.7218e-11	2.19628e-11	1.89808e-11	1.85907e-11	2.08041e-11	1.81196e-11	2.18635e-11
28.62	1.57151e-11	1.64869e-11		1.72373e-11	1.73432e-11		1.95798e-11			2.37357e-11	1.75603e-11	3.81864e-11	1.72107e-11	2.19611e-11	1.89801e-11	1.85889e-11	2.08142e-11	1.81139e-11	2.18635e-11
28.64	1.57222e-11	1.64903e-11		1.72392e-11	1.73399e-11		1.95691e-11			2.37384e-11	1.75487e-11	3.81922e-11	1.72211e-11	2.19632e-11	1.8979e-11	1.85816e-11	2.08108e-11	1.81262e-11	2.18703e-11
28.66	1.57241e-11	1.64883e-11		1.72376e-11	1.73449e-11		1.95879e-11			2.3736e-11	1.75534e-11	3.81823e-11	1.72168e-11	2.19656e-11	1.89873e-11	1.85865e-11	2.08084e-11	1.81105e-11	2.18688e-11
28.68	1.57152e-11	1.64859e-11		1.72387e-11	1.73429e-11		1.95815e-11			2.37354e-11	1.75513e-11	3.81831e-11	1.72302e-11	2.19673e-11	1.89788e-11	1.85876e-11	2.08064e-11	1.81189e-11	2.18725e-11
28.7	1.57212e-11	1.64878e-11		1.72339e-11	1.73381e-11		1.95777e-11			2.37291e-11	1.75536e-11	3.81828e-11	1.72131e-11	2.19619e-11	1.89901e-11	1.85886e-11	2.08082e-11	1.81164e-11	2.18695e-11
28.72	1.57154e-11	1.64826e-11		1.72349e-11	1.73406e-11		1.95957e-11			2.37343e-11	1.7547e-11	3.81837e-11	1.72178e-11	2.19601e-11	1.89653e-11	1.85934e-11	2.08065e-11	1.81185e-11	2.18662e-11
28.74	1.57123e-11	1.64756e-11		1.72284e-11	1.73389e-11		1.9586e-11			2.37378e-11	1.75488e-11	3.81878e-11	1.7195e-11	2.19594e-11	1.89352e-11	1.85876e-11	2.08073e-11	1.81163e-11	2.18667e-11
28.76	1.57224e-11	1.64812e-11		1.72352e-11	1.73388e-11		1.95935e-11			2.37332e-11	1.75507e-11	3.81847e-11	1.72197e-11	2.19582e-11	1.86661e-11	1.85889e-11	2.08154e-11	1.81216e-11	2.18638e-11
28.78	1.57013e-11	1.64823e-11		1.72358e-11	1.73468e-11		1.95839e-11			2.37378e-11	1.75462e-11	3.81826e-11	1.72188e-11	2.19646e-11	1.84875e-11	1.859e-11	2.0816e-11	1.81147e-11	2.1867e-11
28.8	1.57081e-11	1.64883e-11		1.72336e-11	1.73419e-11		1.95796e-11			2.37366e-11	1.75387e-11	3.81803e-11	1.72043e-11	2.19599e-11	1.84706e-11	1.8591e-11	2.08123e-11	1.81203e-11	2.18664e-11
28.82	1.57067e-11	1.64867e-11		1.72389e-11	1.73443e-11		1.95734e-11			2.37361e-11	1.75432e-11	3.81918e-11	1.72173e-11	2.1962e-11	1.84643e-11	1.8589e-11	2.08084e-11	1.81197e-11	2.18629e-11
28.84	1.57107e-11	1.64917e-11		1.7236e-11	1.73436e-11		1.9587e-11			2.3736e-11	1.75395e-11	3.81835e-11	1.72144e-11	2.19626e-11	1.84718e-11	1.85856e-11	2.08135e-11	1.81212e-11	2.18759e-11
28.86	1.57071e-11	1.64847e-11		1.72398e-11	1.73451e-11		1.96103e-11			2.37323e-11	1.75366e-11	3.81866e-11	1.72085e-11	2.19594e-11	1.84701e-11	1.85875e-11	2.08194e-11	1.81122e-11	2.18719e-11
28.88	1.5715e-11	1.64922e-11		1.72413e-11	1.73469e-11		1.96155e-11			2.37356e-11	1.75376e-11	3.81834e-11	1.7215e-11	2.19652e-11	1.84683e-11	1.85854e-11	2.08096e-11	1.81138e-11	2.1866e-11
28.9	1.57111e-11	1.64906e-11		1.72362e-11	1.73445e-11		1.95859e-11			2.37341e-11	1.75369e-11	3.81848e-11	1.7209e-11	2.19648e-11	1.84786e-11	1.85922e-11	2.08187e-11	1.81177e-11	2.18697e-11
28.92	1.5706e-11	1.64845e-11		1.72391e-11	1.73407e-11		1.96045e-11			2.37351e-11	1.75349e-11	3.81864e-11	1.72076e-11	2.19662e-11	1.84757e-11	1.85905e-11	2.08078e-11	1.8119e-11	2.18678e-11
28.94	1.57056e-11	1.64809e-11		1.72354e-11	1.73464e-11		1.95944e-11			2.37337e-11	1.75351e-11	3.81792e-11	1.71967e-11	2.1969e-11	1.84817e-11	1.85917e-11	2.08117e-11	1.81181e-11	2.18652e-11
28.96	1.57085e-11	1.64877e-11		1.72332e-11	1.7343e-11		1.959e-11			2.37354e-11	1.75347e-11	3.81958e-11	1.72147e-11	2.19622e-11	1.84791e-11	1.85872e-11	2.08168e-11	1.81238e-11	2.18696e-11
28.98	1.56976e-11	1.64925e-11		1.72381e-11	1.73451e-11		1.958e-11			2.37386e-11	1.75319e-11	3.81941e-11	1.72082e-11	2.19584e-11	1.84845e-11	1.85905e-11	2.08116e-11	1.81215e-11	2.1864e-11
29	1.57104e-11	1.64892e-11		1.72361e-11	1.73415e-11		1.95899e-11			2.37355e-11	1.75363e-11	3.8187e-11	1.72102e-11	2.19679e-11	1.84754e-11	1.85883e-11	2.08094e-11	1.81189e-11	2.18675e-11
29.02	1.57123e-11	1.6487e-11		1.72343e-11	1.73522e-11		1.95829e-11			2.37356e-11	1.75324e-11	3.81984e-11	1.71962e-11	2.19603e-11	1.84712e-11	1.85873e-11	2.08192e-11	1.81248e-11	2.18619e-11
29.04	1.57115e-11	1.64792e-11		1.72314e-11	1.73452e-11		1.95703e-11			2.37309e-11	1.75332e-11	3.81972e-11	1.71956e-11	2.19642e-11	1.84756e-11	1.85883e-11	2.08054e-11	1.81185e-11	2.18675e-11
29.06	1.57053e-11	1.64995e-11		1.72454e-11	1.73405e-11		1.95746e-11			2.37427e-11	1.75242e-11	3.81862e-11	1.72117e-11	2.19616e-11	1.84739e-11	1.85915e-11	2.08077e-11	1.81158e-11	2.18706e-11
29.08	1.57015e-11	1.64902e-11		1.72402e-11	1.73427e-11		1.95557e-11			2.3735e-11	1.75265e-11	3.81962e-11	1.72071e-11	2.19654e-11	1.84631e-11	1.85752e-11	2.08075e-11	1.81181e-11	2.18692e-11
29.1	1.57058e-11	1.64892e-11		1.72387e-11	1.73491e-11		1.95694e-11			2.37347e-11	1.75304e-11	3.81868e-11	1.72177e-11	2.19628e-11	1.84575e-11	1.85794e-11	2.08102e-11	1.81239e-11	2.18696e-11
29.12	1.57101e-11	1.64874e-11		1.72409e-11	1.73458e-11		1.95644e-11			2.3737e-11	1.75295e-11	3.81943e-11	1.72097e-11	2.19667e-11	1.84649e-11	1.85825e-11	2.08022e-11	1.81141e-11	2.18659e-11
29.14	1.57121e-11	1.64886e-11		1.72406e-11	1.73506e-11		1.95976e-11			2.37274e-11	1.75268e-11	3.81819e-11	1.72206e-11	2.19675e-11	1.84618e-11	1.85668e-11	2.08009e-11	1.81217e-11	2.18606e-11
29.16	1.57066e-11	1.64843e-11		1.72422e-11	1.73493e-11		1.95586e-11			2.37326e-11	1.75169e-11	3.81864e-11	1.72002e-11	2.19687e-11	1.84561e-11	1.84256e-11	2.0806e-11	1.81152e-11	2.18628e-11
29.18	1.57081e-11	1.64892e-11		1.72363e-11	1.73469e-11		1.95843e-11			2.37364e-11	1.75203e-11	3.81877e-11	1.72029e-11	2.19588e-11	1.84509e-11	1.8245e-11	2.08054e-11	1.81136e-11	2.18533e-11
29.2	1.57063e-11	1.64789e-11		1.72426e-11	1.73433e-11		1.95819e-11			2.37269e-11	1.75273e-11	3.81857e-11	1.72053e-11	2.19608e-11	1.84669e-11	1.81981e-11	2.08134e-11	1.81198e-11	2.18587e-11
29.22	1.57043e-11	1.64756e-11		1.72389e-11	1.73387e-11		1.95936e-11			2.37288e-11	1.75193e-11	3.81807e-11	1.71953e-11	2.19684e-11	1.84582e-11	1.81853e-11	2.08162e-11	1.81126e-11	2.18623e-11
29.24	1.57118e-11	1.64924e-11		1.72337e-11			1.95829e-11			2.37384e-11	1.75157e-11	3.81917e-11	1.72087e-11	2.19662e-11	1.84531e-11	1.81854e-11	2.08107e-11	1.81239e-11	2.18659e-11
29.26	1.57083e-11	1.64804e-11		1.72359e-11			1.95866e-11			2.37342e-11	1.75234e-11	3.81829e-11	1.72116e-11	2.19584e-11	1.8453e-11	1.81847e-11	2.081e-11	1.81209e-11	2.18641e-11
29.28	1.57041e-11	1.64879e-11		1.72413e-11			1.95913e-11			2.37317e-11	1.75136e-11	3.81851e-11	1.71956e-11	2.19591e-11	1.84523e-11	1.81953e-11	2.08111e-11	1.81187e-11	2.18632e-11
29.3	1.57123e-11	1.64931e-11		1.72411e-11			1.95924e-11			2.37323e-11	1.75228e-11	3.81929e-11	1.72012e-11	2.19687e-11	1.84575e-11	1.82047e-11	2.08031e-11	1.81189e-11	2.18659e-11
29.32	1.57088e-11	1.64896e-11		1.72392e-11			1.9576e-11			2.3727e-11	1.75177e-11	3.81822e-11	1.72127e-11	2.19625e-11	1.84664e-11	1.82091e-11	2.08015e-11	1.81218e-11	2.18699e-11
29.34	1.57118e-11	1.64904e-11		1.72376e-11			1.95875e-11			2.37266e-11	1.75121e-11	3.81953e-11	1.72101e-11	2.19624e-11	1.84558e-11	1.82104e-11	2.08094e-11	1.81261e-11	2.18635e-11
29.36	1.57021e-11	1.64956e-11		1.72396e-11			1.95903e-11			2.37291e-11	1.75201e-11	3.81912e-11	1.72036e-11	2.19679e-11	1.8463e-11	1.82141e-11	2.0806e-11	1.81296e-11	2.186e-11
29.38	1.57125e-11	1.64874e-11		1.72372e-11			1.95881e-11			2.37286e-11	1.7517e-11	3.8177e-11	1.72163e-11	2.19583e-11	1.84583e-11	1.8213e-11	2.08054e-11	1.81266e-11	2.18617e-11
29.4	1.57126e-11	1.64945e-11		1.72396e-11			1.95666e-11			2.37303e-11	1.75208e-11	3.81869e-11	1.72282e-11	2.19672e-11	1.8464e-11	1.8215e-11	2.08109e-11	1.81209e-11	2.18595e-11
29.42	1.57107e-11	1.64906e-11		1.72391e-11			1.9587e-11			2.3732e-11	1.75149e-11	3.81914e-11	1.72178e-11	2.1968e-11	1.84543e-11	1.82084e-11	2.08064e-11	1.81186e-11	2.18634e-11
29.44	1.57137e-11	1.64967e-11		1.72379e-11			1.95773e-11			2.37309e-11	1.75189e-11	3.81874e-11	1.72031e-11	2.19688e-11	1.84572e-11	1.82095e-11	2.08137e-11	1.81222e-11	2.18659e-11
29.46	1.57017e-11	1.64864e-11		1.72386e-11			1.95679e-11			2.37306e-11	1.75152e-11	3.81936e-11	1.72047e-11	2.19587e-11	1.84634e-11	1.82149e-11	2.08175e-11	1.81266e-11	2.18577e-11
29.48	1.57083e-11	1.64796e-11		1.72426e-11			1.95884e-11			2.37267e-11	1.75095e-11	3.81945e-11	1.7205e-11	2.19652e-11	1.84607e-11	1.82084e-11	2.08098e-11	1.81206e-11	2.18641e-11
29.5	1.57112e-11	1.64979e-11		1.72375e-11			1.95946e-11			2.373e-11	1.75159e-11	3.81867e-11	1.72084e-11	2.19636e-11	1.84617e-11	1.82057e-11	2.08085e-11	1.81174e-11	2.18652e-11
29.52	1.57161e-11	1.64855e-11		1.72407e-11			1.95508e-11			2.37235e-11	1.75098e-11	3.8185e-11	1.72249e-11	2.1964e-11	1.84579e-11	1.82075e-11	2.08017e-11	1.81262e-11	2.18602e-11
29.54	1.57019e-11	1.64871e-11		1.72351e-11			1.95875e-11			2.37229e-11	1.75066e-11	3.81909e-11	1.7216e-11	2.19591e-11	1.84636e-11	1.82069e-11	2.08033e-11	1.81303e-11	2.18671e-11
29.56	1.57095e-11	1.64854e-11		1.72449e-11			1.96078e-11			2.37247e-11	1.75066e-11	3.81846e-11	1.72272e-11	2.19655e-11	1.84608e-11	1.82066e-11	2.08108e-11	1.81262e-11	2.18691e-11
29.58	1.57044e-11	1.6478e-11		1.72424e-11			1.95962e-11			2.37276e-11	1.75082e-11	3.81798e-11	1.72165e-11	2.19617e-11	1.84607e-11	1.82014e-11	2.08115e-11	1.81207e-11	2.18632e-11
29.6	1.57105e-11	1.64817e-11		1.7243e-11			1.95735e-11			2.37264e-11	1.75119e-11	3.81903e-11	1.72165e-11	2.19674e-11	1.84571e-11	1.82062e-11	2.08054e-11	1.81278e-11	2.18659e-11
29.62	1.57142e-11	1.64763e-11		1.72383e-11			1.95897e-11			2.37246e-11	1.75053e-11	3.8183e-11	1.72214e-11	2.19635e-11	1.84705e-11	1.82074e-11	2.08063e-11	1.8124e-11	2.18613e-11
29.64	1.57027e-11	1.64931e-11		1.72371e-11			1.96055e-11			2.37234e-11	1.75085e-11	3.81846e-11	1.72227e-11	2.19643e-11	1.8467e-11	1.82033e-11	2.08026e-11	1.81244e-11	2.18606e-11
29.66	1.57046e-11	1.64964e-11		1.72421e-11			1.95894e-11			2.37274e-11	1.75108e-11	3.81843e-11	1.72099e-11	2.1962e-11	1.84661e-11	1.82038e-11	2.08038e-11	1.81194e-11	2.18628e-11
29.68	1.5702e-11	1.64995e-11		1.72377e-11			1.95785e-11			2.3725e-11	1.75056e-11	3.81942e-11	1.7206e-11	2.19601e-11	1.84633e-11	1.82022e-11	2.08071e-11	1.81253e-11	2.18629e-11
29.7	1.57156e-11	1.6498e-11		1.72364e-11			1.9586e-11			2.37244e-11	1.75063e-11	3.81862e-11	1.71861e-11	2.19723e-11	1.84601e-11	1.82101e-11	2.08077e-11	1.81245e-11	2.18674e-11
29.72	1.5705e-11	1.6489e-11		1.72409e-11			1.9578e-11			2.37207e-11	1.75066e-11	3.81844e-11	1.72092e-11	2.1965e-11	1.84511e-11	1.82036e-11	2.08031e-11	1.81229e-11	2.18675e-11
29.74	1.57115e-11	1.64804e-11		1.72347e-11			1.95795e-11			2.37259e-11	1.75058e-11	3.81856e-11	1.72157e-11	2.19617e-11	1.84549e-11	1.82087e-11	2.08114e-11	1.8123e-11	2.18641e-11
29.76	1.57121e-11	1.64792e-11		1.72388e-11			1.95883e-11			2.37265e-11	1.75074e-11	3.81846e-11	1.72236e-11	2.19675e-11	1.84623e-11	1.82113e-11	2.08221e-11	1.81249e-11	2.18569e-11
29.78	1.57108e-11	1.64829e-11		1.72453e-11			1.95692e-11			2.37198e-11	1.75103e-11	3.81961e-11	1.72147e-11	2.19599e-11	1.84667e-11	1.82108e-11	2.08037e-11	1.81257e-11	2.18649e-11
29.8	1.57094e-11	1.64841e-11		1.72404e-11			1.96059e-11			2.3719e-11	1.75092e-11	3.81821e-11	1.72114e-11	2.19633e-11	1.84559e-11	1.82035e-11	2.08112e-11	1.81224e-11	2.18654e-11
29.82	1.57063e-11	1.64882e-11		1.72398e-11			1.95837e-11			2.37289e-11	1.75054e-11	3.8185e-11	1.7217e-11	2.1961e-11	1.84599e-11	1.82102e-11	2.08118e-11	1.81218e-11	2.18612e-11
29.84	1.57008e-11	1.64955e-11		1.72394e-11			1.95889e-11			2.37192e-11	1.75094e-11	3.81913e-11	1.72224e-11	2.19677e-11	1.84627e-11	1.82081e-11	2.08147e-11	1.81221e-11	2.18664e-11
29.86	1.57072e-11	1.6498e-11		1.72431e-11			1.95868e-11			2.3724e-11	1.75063e-11	3.81932e-11	1.72161e-11	2.19664e-11	1.84629e-11	1.82097e-11	2.08079e-11	1.8128e-11	2.18658e-11
29.88	1.57186e-11	1.64917e-11		1.72387e-11			1.95915e-11			2.3718e-11	1.75036e-11	3.81795e-11	1.72125e-11	2.19621e-11	1.84637e-11	1.82104e-11	2.08139e-11	1.81265e-11	2.18671e-11
29.9	1.571e-11	1.64858e-11		1.72417e-11			1.95856e-11			2.37202e-11	1.75028e-11	3.81872e-11	1.72181e-11	2.19654e-11	1.84638e-11	1.82121e-11	2.08089e-11	1.81244e-11	2.18713e-11
29.92	1.57036e-11	1.64842e-11		1.72419e-11			1.9587e-11			2.37261e-11	1.75043e-11	3.81748e-11	1.7214e-11	2.19664e-11	1.84688e-11	1.8215e-11	2.08008e-11	1.81259e-11	2.18609e-11
29.94	1.57053e-11	1.64822e-11		1.72379e-11			1.96105e-11			2.37205e-11	1.75025e-11	3.81817e-11	1.72303e-11	2.19682e-11	1.84615e-11	1.82067e-11	2.07872e-11	1.81272e-11	2.16535e-11
29.96	1.57034e-11	1.64812e-11		1.72401e-11			1.96003e-11			2.37228e-11	1.75037e-11	3.81871e-11	1.72093e-11	2.19624e-11	1.84619e-11	1.82057e-11	2.07645e-11	1.81321e-11	2.14957e-11
29.98	1.57036e-11	1.64827e-11		1.72404e-11			1.96009e-11			2.37197e-11	1.74989e-11	3.81907e-11	1.72245e-11	2.1959e-11	1.84585e-11	1.8204e-11	2.07695e-11	1.81304e-11	2.14662e-11
30	1.5712e-11	1.64787e-11		1.72387e-11			1.95725e-11			2.37279e-11	1.75001e-11	3.8187e-11	1.72192e-11	2.19654e-11	1.84583e-11	1.82123e-11	2.07614e-11	1.81287e-11	2.14683e-11
30.02	1.57109e-11	1.64866e-11		1.72383e-11			1.96095e-11			2.37251e-11	1.75045e-11	3.81897e-11	1.72273e-11	2.19658e-11	1.84673e-11	1.82117e-11	2.07612e-11	1.81303e-11	2.14568e-11
30.04	1.57135e-11	1.64779e-11		1.72407e-11						2.37245e-11	1.74997e-11	3.8194e-11	1.722e-11	2.19637e-11	1.84664e-11	1.82097e-11	2.07671e-11	1.81348e-11	2.14715e-11
30.06	1.57058e-11	1.64754e-11		1.72444e-11						2.37225e-11	1.7507e-11	3.81902e-11	1.72182e-11	2.19674e-11	1.84619e-11	1.82104e-11	2.07758e-11	1.81265e-11	2.14781e-11
30.08	1.57024e-11	1.64781e-11		1.72415e-11						2.37194e-11	1.75005e-11	3.81902e-11	1.72094e-11	2.19683e-11	1.84637e-11	1.8214e-11	2.07706e-11	1.81313e-11	2.14932e-11
30.1	1.57047e-11	1.6488e-11		1.72418e-11						2.37231e-11	1.75019e-11	3.81746e-11	1.72014e-11	2.19662e-11	1.84658e-11	1.82146e-11	2.07913e-11	1.81303e-11	2.14877e-11
30.12	1.57062e-11	1.64842e-11		1.72411e-11						2.37214e-11	1.7503e-11	3.81904e-11	1.71951e-11	2.19667e-11	1.84653e-11	1.82083e-11	2.0787e-11	1.81232e-11	2.1496e-11
30.14	1.57082e-11	1.64977e-11		1.72442e-11						2.3722e-11	1.7498e-11	3.8178e-11	1.72108e-11	2.19633e-11	1.8462e-11	1.82101e-11	2.07957e-11	1.81259e-11	2.15019e-11
30.16	1.5708e-11	1.64817e-11		1.72383e-11						2.37272e-11	1.75029e-11	3.81857e-11	1.72039e-11	2.19636e-11	1.84545e-11	1.82093e-11	2.0802e-11	1.81314e-11	2.14953e-11
30.18	1.5714e-11	1.64778e-11		1.72451e-11						2.37187e-11	1.74979e-11	3.81924e-11	1.72223e-11	2.19642e-11	1.84605e-11	1.82115e-11	2.08091e-11	1.8127e-11	2.14958e-11
30.2	1.57031e-11	1.64804e-11		1.72409e-11						2.37263e-11	1.7501e-11	3.81839e-11	1.7231e-11	2.19647e-11	1.84524e-11	1.82128e-11	2.07995e-11	1.8123e-11	2.14979e-11
30.22	1.56999e-11	1.64729e-11		1.72387e-11						2.37223e-11	1.74972e-11	3.81864e-11	1.72215e-11	2.19603e-11	1.84597e-11	1.82114e-11	2.08034e-11	1.81165e-11	2.14993e-11
30.24	1.57116e-11	1.64792e-11		1.72439e-11						2.37286e-11	1.74983e-11	3.81809e-11	1.72271e-11	2.19699e-11	1.84669e-11	1.8214e-11	2.0809e-11	1.81164e-11	2.15059e-11
30.26	1.57057e-11	1.64818e-11		1.72412e-11						2.37266e-11	1.7503e-11	3.81863e-11	1.72245e-11	2.19638e-11	1.84709e-11	1.82158e-11	2.08161e-11	1.81141e-11	2.15062e-11
30.28	1.57177e-11	1.6482e-11		1.7241e-11						2.37219e-11	1.75015e-11	3.81804e-11	1.72185e-11	2.19645e-11	1.84643e-11	1.82092e-11	2.08133e-11	1.81103e-11	2.14992e-11
30.3	1.57143e-11	1.64908e-11		1.72427e-11						2.37252e-11	1.7506e-11	3.81935e-11	1.72227e-11	2.19704e-11	1.84637e-11	1.82118e-11	2.08182e-11	1.81158e-11	2.15008e-11
30.32	1.57093e-11	1.64851e-11		1.72411e-11						2.37244e-11	1.74963e-11	3.81769e-11	1.72086e-11	2.19578e-11	1.84657e-11	1.82121e-11	2.08201e-11	1.81297e-11	2.15014e-11
30.34	1.57106e-11	1.64936e-11		1.72429e-11						2.37223e-11	1.74992e-11	3.81843e-11	1.71922e-11	2.19622e-11	1.84751e-11	1.82144e-11	2.0828e-11	1.81439e-11	2.15022e-11
30.36	1.57171e-11	1.64872e-11		1.72386e-11						2.37223e-11	1.74933e-11	3.8186e-11	1.72184e-11	2.19695e-11	1.84661e-11	1.82141e-11	2.08181e-11	1.81644e-11	2.14998e-11
30.38	1.57169e-11	1.64935e-11		1.72434e-11						2.37243e-11	1.75003e-11	3.81838e-11	1.72084e-11	2.19653e-11	1.84729e-11	1.82135e-11	2.08242e-11	1.81735e-11	2.15056e-11
30.4	1.57095e-11	1.64894e-11		1.72411e-11						2.37204e-11	1.74969e-11	3.8192e-11	1.72156e-11	2.19672e-11	1.84671e-11	1.82124e-11	2.08349e-11	1.81754e-11	2.15029e-11
30.42	1.57145e-11	1.64864e-11		1.72457e-11						2.37186e-11	1.74989e-11	3.81932e-11	1.72241e-11	2.19652e-11	1.84733e-11	1.82132e-11	2.08266e-11	1.81811e-11	2.15055e-11
30.44	1.57277e-11	1.64877e-11		1.72402e-11						2.37265e-11	1.75e-11	3.8186e-11	1.72158e-11	2.19659e-11	1.84618e-11	1.82172e-11	2.08419e-11	1.81881e-11	2.15077e-11
30.46	1.57047e-11	1.64831e-11		1.72488e-11						2.3718e-11	1.75003e-11	3.81835e-11	1.72315e-11	2.19656e-11	1.84685e-11	1.82129e-11	2.084e-11	1.81878e-11	2.15092e-11
30.48	1.57091e-11	1.64907e-11		1.72425e-11						2.3723e-11	1.74993e-11	3.81903e-11	1.72234e-11	2.19637e-11	1.84623e-11	1.82194e-11	2.08421e-11	1.81893e-11	2.15045e-11
30.5	1.57121e-11	1.64928e-11		1.72405e-11						2.37225e-11	1.74955e-11	3.8185e-11	1.72171e-11	2.19639e-11	1.84677e-11	1.82155e-11	2.08495e-11	1.81986e-11	2.1508e-11
30.52	1.57148e-11	1.64968e-11		1.72453e-11						2.37204e-11	1.74982e-11	3.81836e-11	1.72229e-11	2.19614e-11	1.8465e-11	1.82128e-11	2.08433e-11	1.81868e-11	2.15039e-11
30.54	1.57169e-11	1.64889e-11		1.72404e-11						2.37191e-11	1.74942e-11	3.81923e-11	1.72189e-11	2.1969e-11	1.84646e-11	1.82082e-11	2.08453e-11	1.81897e-11	2.15069e-11
30.56	1.57172e-11	1.65007e-11		1.72434e-11						2.37168e-11	1.74983e-11	3.81868e-11	1.72237e-11	2.19615e-11	1.84608e-11	1.82137e-11	2.08476e-11	1.81913e-11	2.1506e-11
30.58	1.57105e-11	1.6487e-11		1.72458e-11						2.37161e-11	1.74933e-11	3.8188e-11	1.72211e-11	2.19684e-11	1.84653e-11	1.82198e-11	2.08555e-11	1.8187e-11	2.15048e-11
30.6	1.57073e-11	1.64864e-11		1.72396e-11						2.37189e-11	1.74977e-11	3.81918e-11	1.72301e-11	2.19639e-11	1.84653e-11	1.82152e-11	2.08448e-11	1.81904e-11	2.15048e-11
30.62	1.57117e-11	1.6487e-11		1.7245e-11						2.37181e-11	1.74964e-11	3.81887e-11	1.72343e-11	2.19651e-11	1.84642e-11	1.82145e-11	2.0855e-11	1.81847e-11	2.15035e-11
30.64	1.5708e-11	1.64844e-11		1.72405e-11						2.37199e-11	1.74946e-11	3.81866e-11	1.72064e-11	2.19623e-11	1.84616e-11	1.82145e-11	2.08574e-11	1.81803e-11	2.15133e-11
30.66	1.57223e-11	1.64817e-11		1.72435e-11						2.37209e-11	1.74993e-11	3.81876e-11	1.72148e-11	2.19648e-11	1.84591e-11	1.82196e-11	2.08533e-11	1.81862e-11	2.15147e-11
30.68	1.57127e-11	1.64969e-11		1.72454e-11						2.37161e-11	1.74931e-11	3.81883e-11	1.72276e-11	2.19687e-11	1.84601e-11	1.82128e-11	2.08663e-11	1.81804e-11	2.15011e-11
30.7	1.57197e-11	1.64813e-11		1.72425e-11						2.37229e-11	1.74962e-11	3.81851e-11	1.72124e-11	2.19663e-11	1.84674e-11	1.82169e-11	2.08594e-11	1.81761e-11	2.15108e-11
30.72	1.57069e-11	1.64916e-11		1.72387e-11						2.37167e-11	1.74926e-11	3.81884e-11	1.7213e-11	2.19642e-11	1.84611e-11	1.82085e-11	2.08689e-11	1.81838e-11	2.15061e-11
30.74	1.57047e-11	1.64903e-11		1.72425e-11						2.37217e-11	1.7493e-11	3.81784e-11	1.72149e-11	2.19663e-11	1.84684e-11	1.82181e-11	2.08684e-11	1.81716e-11	2.15101e-11
30.76	1.57139e-11	1.64917e-11		1.72455e-11						2.37181e-11	1.74952e-11	3.81875e-11	1.72261e-11	2.19654e-11	1.84686e-11	1.82189e-11	2.0871e-11	1.81758e-11	2.15105e-11
30.78	1.57141e-11	1.64857e-11		1.72429e-11						2.37216e-11	1.74922e-11	3.81974e-11	1.72247e-11	2.19642e-11	1.84644e-11	1.82119e-11	2.08774e-11	1.81666e-11	2.15111e-11
30.8	1.57162e-11	1.6499e-11		1.72416e-11						2.37182e-11	1.7492e-11	3.81844e-11	1.72138e-11	2.19631e-11	1.84693e-11	1.82137e-11	2.08813e-11	1.81761e-11	2.15164e-11
30.82	1.57173e-11	1.64884e-11		1.72443e-11						2.372e-11	1.74866e-11	3.81862e-11	1.72023e-11	2.19665e-11	1.84711e-11	1.8224e-11	2.08815e-11	1.8171e-11	2.15093e-11
30.84	1.57055e-11	1.64935e-11		1.72406e-11						2.37219e-11	1.74944e-11	3.81887e-11	1.71998e-11	2.19639e-11	1.84697e-11	1.82219e-11	2.08884e-11	1.81663e-11	2.15181e-11
30.86	1.57159e-11	1.64986e-11		1.72406e-11						2.37195e-11	1.74915e-11	3.81803e-11	1.72287e-11	2.19681e-11	1.84645e-11	1.82179e-11	2.08847e-11	1.81651e-11	2.15122e-11
30.88	1.57133e-11	1.64846e-11		1.72419e-11						2.37183e-11	1.74875e-11	3.81881e-11	1.71983e-11	2.19646e-11	1.84684e-11	1.82227e-11	2.08853e-11	1.81649e-11	2.1516e-11
30.9	1.57121e-11	1.64926e-11		1.72406e-11						2.37189e-11	1.74929e-11	3.81864e-11	1.72225e-11	2.19648e-11	1.84672e-11	1.82218e-11	2.08832e-11	1.8163e-11	2.15119e-11
30.92	1.57122e-11	1.64839e-11		1.72453e-11						2.37172e-11	1.74905e-11	3.81905e-11	1.72053e-11	2.19684e-11	1.84709e-11	1.82148e-11	2.08814e-11	1.81684e-11	2.15072e-11
30.94	1.57136e-11	1.64883e-11		1.72454e-11						2.37239e-11	1.74953e-11	3.81901e-11	1.71962e-11	2.19631e-11	1.84674e-11	1.82224e-11	2.08903e-11	1.81616e-11	2.15089e-11
30.96	1.57183e-11	1.64871e-11		1.72425e-11						2.37174e-11	1.74875e-11	3.81915e-11	1.72056e-11	2.19692e-11	1.84714e-11	1.82214e-11	2.08934e-11	1.81615e-11	2.15134e-11
30.98	1.57139e-11	1.64896e-11		1.72454e-11						2.37236e-11	1.74909e-11	3.81884e-11	1.72192e-11	2.19624e-11	1.84676e-11	1.82202e-11	2.08817e-11	1.81522e-11	2.15055e-11
31	1.57167e-11	1.64861e-11		1.72443e-11						2.37278e-11	1.74852e-11	3.81945e-11	1.72132e-11	2.19704e-11	1.84662e-11	1.82143e-11	2.08922e-11	1.81531e-11	2.15132e-11
31.02	1.57085e-11	1.64851e-11		1.72442e-11						2.37252e-11	1.74881e-11	3.81845e-11	1.72271e-11	2.19688e-11	1.84648e-11	1.8216e-11	2.08958e-11	1.81555e-11	2.15194e-11
31.04	1.57061e-11	1.64898e-11		1.72502e-11						2.37175e-11	1.7489e-11	3.81895e-11	1.72197e-11	2.18952e-11	1.84716e-11	1.82142e-11	2.09097e-11	1.81588e-11	2.15158e-11
31.06	1.5709e-11	1.64999e-11		1.72473e-11						2.37169e-11	1.74874e-11	3.81881e-11	1.72171e-11	2.17398e-11	1.84681e-11	1.82216e-11	2.09031e-11	1.81571e-11	2.15136e-11
31.08	1.5713e-11	1.649e-11		1.72455e-11						2.37171e-11	1.74906e-11	3.81855e-11	1.72211e-11	2.17122e-11	1.84703e-11	1.82211e-11	2.0899e-11	1.81459e-11	2.1516e-11
31.1	1.57135e-11	1.64887e-11		1.72416e-11						2.37234e-11	1.74898e-11	3.81875e-11	1.72015e-11	2.17124e-11	1.84692e-11	1.8218e-11	2.09164e-11	1.81517e-11	2.15129e-11
31.12	1.57191e-11	1.64874e-11		1.72476e-11						2.37184e-11	1.7495e-11	3.81853e-11	1.72308e-11	2.17209e-11	1.84706e-11	1.82199e-11	2.09079e-11	1.8153e-11	2.15138e-11
31.14	1.57211e-11	1.64782e-11		1.72449e-11						2.37228e-11	1.7487e-11	3.81858e-11	1.72081e-11	2.17213e-11	1.84658e-11	1.82195e-11	2.0915e-11	1.8152e-11	2.15075e-11
31.16	1.57152e-11	1.64783e-11		1.72464e-11						2.37188e-11	1.74833e-11	3.81876e-11	1.72002e-11	2.1731e-11	1.8465e-11	1.82194e-11	2.09202e-11	1.81472e-11	2.15181e-11
31.18	1.57198e-11	1.64793e-11		1.72416e-11						2.37186e-11	1.74854e-11	3.81872e-11	1.7211e-11	2.17465e-11	1.84684e-11	1.82194e-11	2.09221e-11	1.8152e-11	2.1511e-11
31.2	1.57135e-11	1.64771e-11		1.72463e-11						2.37139e-11	1.74861e-11	3.81822e-11	1.72015e-11	2.17565e-11	1.84728e-11	1.82215e-11	2.0917e-11	1.8149e-11	2.1513e-11
31.22	1.5705e-11	1.64836e-11		1.72468e-11						2.37112e-11	1.74892e-11	3.8187e-11	1.72133e-11	2.17526e-11	1.84722e-11	1.82145e-11	2.09315e-11	1.81467e-11	2.15159e-11
31.24	1.5724e-11	1.64863e-11		1.72503e-11						2.37166e-11	1.74832e-11	3.81827e-11	1.72203e-11	2.17561e-11	1.84629e-11	1.82177e-11	2.09252e-11	1.81467e-11	2.15073e-11
31.26	1.57211e-11	1.64925e-11		1.7246e-11						2.37169e-11	1.74856e-11	3.818e-11	1.71983e-11	2.17614e-11	1.8471e-11	1.82196e-11	2.09221e-11	1.8153e-11	2.15169e-11
31.28	1.57211e-11	1.64888e-11		1.7244e-11						2.37186e-11	1.74915e-11	3.8189e-11	1.72141e-11	2.17604e-11	1.84575e-11	1.82207e-11	2.09293e-11	1.8142e-11	2.15198e-11
31.3	1.57199e-11	1.64853e-11		1.72439e-11						2.37164e-11	1.74869e-11	3.81899e-11	1.71914e-11	2.17549e-11	1.84703e-11	1.82227e-11	2.09294e-11	1.81471e-11	2.15148e-11
31.32	1.57102e-11	1.64831e-11		1.72414e-11						2.37164e-11	1.74887e-11	3.81877e-11	1.71928e-11	2.17584e-11	1.84713e-11	1.82238e-11	2.09379e-11	1.81423e-11	2.15138e-11
31.34	1.57178e-11	1.64802e-11		1.72426e-11						2.3717e-11	1.749e-11	3.81917e-11	1.72132e-11	2.17674e-11	1.84725e-11	1.82222e-11	2.09324e-11	1.81476e-11	2.15154e-11
31.36	1.57164e-11	1.6485e-11		1.72471e-11						2.37151e-11	1.74929e-11	3.81855e-11	1.72042e-11	2.17611e-11	1.84777e-11	1.82209e-11	2.09361e-11	1.81401e-11	2.15181e-11
31.38	1.5723e-11	1.64808e-11		1.72426e-11						2.37123e-11	1.74887e-11	3.81811e-11	1.72199e-11	2.17617e-11	1.84726e-11	1.82172e-11	2.09462e-11	1.81428e-11	2.15153e-11
31.4	1.57139e-11	1.64778e-11		1.72446e-11						2.37166e-11	1.74875e-11	3.81853e-11	1.72253e-11	2.17598e-11	1.84801e-11	1.82195e-11	2.09475e-11	1.81456e-11	2.15187e-11
31.42	1.57216e-11	1.64841e-11		1.72438e-11						2.37192e-11	1.74897e-11	3.81921e-11	1.72222e-11	2.17659e-11	1.8466e-11	1.8219e-11	2.09376e-11	1.81466e-11	2.15237e-11
31.44	1.57144e-11	1.64823e-11		1.72378e-11						2.37199e-11	1.7483e-11	3.81839e-11	1.72213e-11	2.17624e-11	1.84638e-11	1.82201e-11	2.09429e-11	1.81408e-11	2.15232e-11
31.46	1.57077e-11	1.64823e-11		1.72427e-11						2.37163e-11	1.74808e-11	3.81818e-11	1.72153e-11	2.17613e-11	1.84721e-11	1.82213e-11	2.09407e-11	1.81419e-11	2.15189e-11
31.48	1.57148e-11	1.64808e-11		1.72401e-11						2.37175e-11	1.74834e-11	3.81903e-11	1.72182e-11	2.17552e-11	1.84719e-11	1.82224e-11	2.09435e-11	1.81347e-11	2.15193e-11
31.5	1.57197e-11	1.64897e-11		1.72478e-11						2.37158e-11	1.74875e-11	3.81849e-11	1.72165e-11	2.17603e-11	1.84808e-11	1.82195e-11	2.09494e-11	1.814e-11	2.15182e-11
31.52	1.5715e-11	1.64844e-11		1.72436e-11						2.37145e-11	1.74838e-11	3.81904e-11	1.72276e-11	2.17546e-11	1.8471e-11	1.82197e-11	2.09605e-11	1.81373e-11	2.15145e-11
31.54	1.57142e-11	1.64866e-11		1.72454e-11						2.37164e-11	1.74909e-11	3.81866e-11	1.72239e-11	2.17632e-11	1.84723e-11	1.82185e-11	2.09508e-11	1.81398e-11	2.15182e-11
31.56	1.57068e-11	1.64825e-11		1.72462e-11						2.37136e-11	1.74899e-11	3.81859e-11	1.72267e-11	2.17629e-11	1.84763e-11	1.82208e-11	2.09517e-11	1.81372e-11	2.15197e-11
31.58	1.57199e-11	1.64823e-11		1.72416e-11						2.37165e-11	1.74876e-11	3.81866e-11	1.72224e-11	2.17612e-11	1.847e-11	1.82153e-11	2.09566e-11	1.81429e-11	2.15227e-11
31.6	1.57177e-11	1.6482e-11		1.72446e-11						2.37153e-11	1.74835e-11	3.81937e-11	1.72151e-11	2.17544e-11	1.84761e-11	1.82286e-11	2.09627e-11	1.81419e-11	2.15187e-11
31.62	1.57183e-11	1.64803e-11		1.72453e-11						2.37181e-11	1.7489e-11	3.81966e-11	1.72068e-11	2.17561e-11	1.84682e-11	1.82197e-11	2.09594e-11	1.8139e-11	2.15152e-11
31.64	1.57219e-11	1.64876e-11		1.72438e-11						2.37142e-11	1.74879e-11	3.81789e-11	1.72089e-11	2.17571e-11	1.84617e-11	1.82203e-11	2.09544e-11	1.81479e-11	2.15134e-11
31.66	1.57254e-11	1.64835e-11		1.72465e-11						2.37185e-11	1.74875e-11	3.81921e-11	1.72011e-11	2.17611e-11	1.84675e-11	1.82196e-11	2.09638e-11	1.81438e-11	2.15113e-11
31.68	1.57248e-11	1.648e-11		1.72453e-11						2.37186e-11	1.74824e-11	3.81853e-11	1.72171e-11	2.176e-11	1.84652e-11	1.82167e-11	2.09641e-11	1.81361e-11	2.15213e-11
31.7	1.5725e-11	1.64852e-11		1.72478e-11						2.37198e-11	1.74831e-11	3.81908e-11	1.72128e-11	2.17626e-11	1.84854e-11	1.82194e-11	2.09623e-11	1.81378e-11	2.1516e-11
31.72	1.57315e-11	1.64887e-11		1.72484e-11						2.37187e-11	1.74795e-11	3.81905e-11	1.72207e-11	2.17599e-11	1.84675e-11	1.82256e-11	2.09655e-11	1.81422e-11	2.15207e-11
31.74	1.57219e-11	1.64856e-11		1.72419e-11						2.37178e-11	1.74863e-11	3.81912e-11	1.72119e-11	2.17588e-11	1.84768e-11	1.82196e-11	2.09662e-11	1.81358e-11	2.15261e-11
31.76	1.57332e-11	1.64923e-11		1.72412e-11						2.37156e-11	1.74857e-11	3.81841e-11	1.72048e-11	2.17619e-11	1.84754e-11	1.82178e-11	2.09731e-11	1.81395e-11	2.15269e-11
31.78	1.57192e-11	1.64974e-11		1.72474e-11						2.37097e-11	1.74882e-11	3.81936e-11	1.71979e-11	2.17609e-11	1.84642e-11	1.82181e-11	2.09642e-11	1.81324e-11	2.15204e-11
31.8	1.57191e-11	1.64853e-11		1.72443e-11						2.37138e-11	1.74834e-11	3.81874e-11	1.72079e-11	2.17591e-11	1.84693e-11	1.82218e-11	2.09672e-11	1.81336e-11	2.15215e-11
31.82	1.57268e-11	1.64875e-11		1.72475e-11						2.3712e-11	1.74882e-11	3.81883e-11	1.72149e-11	2.17625e-11	1.84676e-11	1.82237e-11	2.09786e-11	1.81365e-11	2.15198e-11
31.84	1.57204e-11	1.64892e-11		1.72445e-11						2.37158e-11	1.74882e-11	3.81831e-11	1.7228e-11	2.17572e-11	1.84743e-11	1.82241e-11	2.09743e-11	1.81401e-11	2.15203e-11
31.86	1.57203e-11	1.64848e-11		1.72495e-11						2.37123e-11	1.74845e-11	3.81821e-11	1.72191e-11	2.17565e-11	1.84769e-11	1.82221e-11	2.09779e-11	1.81406e-11	2.15166e-11
31.88	1.57252e-11	1.64795e-11		1.72462e-11						2.37176e-11	1.74846e-11	3.81925e-11	1.72032e-11	2.17589e-11	1.8471e-11	1.82272e-11	2.09838e-11	1.81376e-11	2.15159e-11
31.9	1.57291e-11	1.6481e-11		1.72413e-11						2.37159e-11	1.74843e-11	3.8193e-11	1.72045e-11	2.17563e-11	1.84702e-11	1.822e-11	2.09818e-11	1.81353e-11	2.1523e-11
31.92	1.57345e-11	1.64892e-11		1.72423e-11						2.37216e-11	1.74829e-11	3.81826e-11	1.72107e-11	2.17562e-11	1.84653e-11	1.82242e-11	2.09754e-11	1.8141e-11	2.15128e-11
31.94	1.57261e-11	1.64806e-11		1.72435e-11						2.37156e-11	1.74835e-11	3.81857e-11	1.72087e-11	2.17614e-11	1.8455e-11	1.82167e-11	2.09866e-11	1.81421e-11	2.15135e-11
31.96	1.57285e-11	1.64818e-11		1.72425e-11						2.37149e-11	1.74881e-11	3.8192e-11	1.72072e-11	2.17582e-11	1.84567e-11	1.82229e-11	2.09779e-11	1.81367e-11	2.15213e-11
31.98	1.5721e-11	1.64824e-11		1.72448e-11						2.37139e-11	1.74886e-11	3.81903e-11	1.72262e-11	2.17618e-11	1.84569e-11	1.82214e-11	2.09846e-11	1.8135e-11	2.15143e-11
32	1.57204e-11	1.64875e-11		1.72508e-11						2.37135e-11	1.74889e-11	3.81898e-11	1.72304e-11	2.17565e-11	1.84671e-11	1.82222e-11	2.09856e-11	1.81401e-11	2.15172e-11
32.02	1.57255e-11	1.64823e-11		1.72428e-11						2.3715e-11	1.74908e-11	3.81873e-11	1.72133e-11	2.17585e-11	1.84613e-11	1.822e-11	2.09825e-11	1.81333e-11	2.15165e-11
32.04	1.5737e-11	1.64982e-11		1.72504e-11						2.37133e-11	1.74873e-11	3.81888e-11	1.72124e-11	2.17574e-11	1.84696e-11	1.82229e-11	2.09929e-11	1.81339e-11	2.15175e-11
32.06	1.57174e-11	1.64914e-11		1.72464e-11						2.37129e-11	1.74902e-11	3.81825e-11	1.72202e-11	2.17558e-11	1.8456e-11	1.82247e-11	2.09866e-11	1.81424e-11	2.15175e-11
32.08	1.57177e-11	1.64894e-11		1.72449e-11						2.37113e-11	1.74853e-11	3.81835e-11	1.72258e-11	2.17524e-11	1.84533e-11	1.82229e-11	2.10043e-11	1.81366e-11	2.15197e-11
32.1	1.57168e-11	1.64955e-11		1.72462e-11						2.3718e-11	1.74869e-11	3.81939e-11	1.72103e-11	2.17582e-11	1.84613e-11	1.82242e-11	2.0992e-11	1.8135e-11	2.15227e-11
32.12	1.57233e-11	1.64841e-11		1.7248e-11						2.37153e-11	1.7485e-11	3.81855e-11	1.72099e-11	2.17541e-11	1.84631e-11	1.82232e-11	2.09995e-11	1.81392e-11	2.15245e-11
32.14	1.57247e-11	1.64878e-11		1.72462e-11						2.37153e-11	1.74862e-11	3.81848e-11	1.72039e-11	2.17619e-11	1.84597e-11	1.8227e-11	2.09937e-11	1.81383e-11	2.15266e-11
32.16	1.57211e-11	1.64915e-11		1.72423e-11						2.37178e-11	1.74883e-11	3.81871e-11	1.72086e-11	2.17583e-11	1.84606e-11	1.82206e-11	2.09991e-11	1.81363e-11	2.15218e-11
32.18	1.57257e-11	1.64917e-11		1.72481e-11						2.37199e-11	1.74863e-11	3.81933e-11	1.72057e-11	2.17544e-11	1.84612e-11	1.82218e-11	2.09984e-11	1.81367e-11	2.15213e-11
32.2	1.57389e-11	1.64821e-11		1.72492e-11						2.37183e-11	1.74863e-11	3.81827e-11	1.72099e-11	2.17607e-11	1.84602e-11	1.82214e-11	2.09968e-11	1.81383e-11	2.15184e-11
32.22	1.5736e-11	1.64918e-11		1.72448e-11						2.37175e-11	1.74795e-11	3.81847e-11	1.72087e-11	2.17596e-11	1.84687e-11	1.82207e-11	2.09899e-11	1.81379e-11	2.1525e-11
32.24	1.57252e-11	1.6488e-11		1.72378e-11						2.37124e-11	1.74911e-11	3.81827e-11	1.72121e-11	2.17626e-11	1.84669e-11	1.82233e-11	2.0996e-11	1.81389e-11	2.15249e-11
32.26	1.57325e-11	1.64874e-11		1.72515e-11						2.37151e-11	1.74828e-11	3.81828e-11	1.72184e-11	2.17557e-11	1.84679e-11	1.82255e-11	2.10021e-11	1.81361e-11	2.15238e-11
32.28	1.57395e-11	1.64882e-11		1.72481e-11						2.37148e-11	1.74827e-11	3.81873e-11	1.72025e-11	2.17579e-11	1.84636e-11	1.82257e-11	2.10069e-11	1.81389e-11	2.15239e-11
32.3	1.57314e-11	1.64882e-11		1.72465e-11						2.37203e-11	1.74828e-11	3.81849e-11	1.72004e-11	2.17572e-11	1.84679e-11	1.82223e-11	2.09963e-11	1.8139e-11	2.15173e-11
32.32	1.57349e-11	1.64861e-11		1.7247e-11						2.37177e-11	1.748e-11	3.81837e-11	1.72077e-11	2.17557e-11	1.84612e-11	1.82182e-11	2.10018e-11	1.8134e-11	2.15253e-11
32.34	1.57314e-11	1.64787e-11		1.72492e-11						2.37192e-11	1.74843e-11	3.81856e-11	1.71987e-11	2.17563e-11	1.84608e-11	1.82213e-11	2.09965e-11	1.8133e-11	2.15177e-11
32.36	1.57233e-11	1.64874e-11		1.72522e-11						2.3714e-11	1.74825e-11	3.81848e-11	1.72021e-11	2.17611e-11	1.84675e-11	1.82202e-11	2.10128e-11	1.8138e-11	2.15243e-11
32.38	1.57374e-11	1.64865e-11		1.72437e-11						2.37184e-11	1.7485e-11	3.81883e-11	1.72063e-11	2.17593e-11	1.84715e-11	1.82251e-11	2.10095e-11	1.81391e-11	2.15256e-11
32.4	1.57351e-11	1.64908e-11		1.72525e-11						2.37139e-11	1.74864e-11	3.81894e-11	1.72089e-11	2.17618e-11	1.84786e-11	1.82238e-11	2.10111e-11	1.81372e-11	2.15223e-11
32.42	1.57303e-11	1.64997e-11		1.72505e-11						2.37176e-11	1.74852e-11	3.81829e-11	1.72108e-11	2.17548e-11	1.84715e-11	1.82248e-11	2.10051e-11	1.81369e-11	2.1521e-11
32.44	1.5726e-11	1.64879e-11		1.72472e-11						2.37151e-11	1.74817e-11	3.81822e-11	1.72071e-11	2.17607e-11	1.84646e-11	1.82223e-11	2.10107e-11	1.81343e-11	2.15231e-11
32.46	1.57252e-11	1.64838e-11		1.72523e-11						2.3722e-11	1.7485e-11	3.81781e-11	1.72119e-11	2.17604e-11	1.84667e-11	1.82255e-11	2.10068e-11	1.81413e-11	2.15246e-11
32.48	1.57253e-11	1.65036e-11		1.72451e-11						2.37126e-11	1.74793e-11	3.8185e-11	1.72016e-11	2.17596e-11	1.84702e-11	1.82194e-11	2.10157e-11	1.8132e-11	2.15228e-11
32.5	1.57275e-11	1.64854e-11		1.7248e-11						2.37154e-11	1.74777e-11	3.81864e-11	1.72055e-11	2.17599e-11	1.84703e-11	1.82234e-11	2.10125e-11	1.81376e-11	2.15264e-11
32.52	1.57297e-11	1.64871e-11		1.72446e-11						2.37165e-11	1.74849e-11	3.81922e-11	1.71919e-11	2.17586e-11	1.84609e-11	1.82214e-11	2.10163e-11	1.81399e-11	2.1522e-11
32.54	1.57336e-11	1.64951e-11		1.72476e-11						2.37157e-11	1.74842e-11	3.81877e-11	1.72051e-11	2.17538e-11	1.84563e-11	1.82216e-11	2.10045e-11	1.81396e-11	2.15154e-11
32.56	1.5737e-11	1.6487e-11		1.7245e-11						2.37145e-11	1.7487e-11	3.81877e-11	1.72131e-11	2.17618e-11	1.84703e-11	1.82206e-11	2.1012e-11	1.81429e-11	2.1518e-11
32.58	1.5733e-11	1.64883e-11		1.72471e-11						2.37141e-11	1.74845e-11	3.81869e-11	1.72093e-11	2.17593e-11	1.84671e-11	1.82219e-11	2.10119e-11	1.81381e-11	2.15208e-11
32.6	1.57254e-11	1.64846e-11		1.72491e-11						2.37154e-11	1.74864e-11	3.81834e-11	1.72046e-11	2.17558e-11	1.84657e-11	1.82239e-11	2.10155e-11	1.81377e-11	2.15212e-11
32.62	1.57197e-11	1.64902e-11		1.72459e-11						2.37199e-11	1.74827e-11	3.81754e-11	1.72012e-11	2.1757e-11	1.84683e-11	1.82212e-11	2.10119e-11	1.81447e-11	2.1529e-11
32.64	1.57277e-11	1.64949e-11		1.72466e-11						2.37178e-11	1.74789e-11	3.81801e-11	1.72129e-11	2.17589e-11	1.84649e-11	1.82209e-11	2.10182e-11	1.814e-11	2.15185e-11
32.66	1.57251e-11	1.64879e-11		1.72479e-11						2.37181e-11	1.74749e-11	3.81886e-11	1.71917e-11	2.17596e-11	1.84694e-11	1.82259e-11	2.10149e-11	1.8132e-11	2.15266e-11
32.68	1.57293e-11	1.64791e-11		1.72567e-11						2.37126e-11	1.74817e-11	3.8189e-11	1.72015e-11	2.17587e-11	1.84696e-11	1.82192e-11	2.10183e-11	1.8147e-11	2.1524e-11
32.7	1.57246e-11	1.64889e-11		1.72524e-11						2.37173e-11	1.74804e-11	3.81878e-11	1.71934e-11	2.17574e-11	1.84738e-11	1.8219e-11	2.10229e-11	1.81426e-11	2.15252e-11
32.72	1.57211e-11	1.64843e-11		1.72477e-11						2.37191e-11	1.74765e-11	3.81797e-11	1.7193e-11	2.176e-11	1.84711e-11	1.82212e-11	2.10199e-11	1.81414e-11	2.15235e-11
32.74	1.5716e-11	1.64832e-11		1.72479e-11						2.37166e-11	1.74816e-11	3.81815e-11	1.72026e-11	2.17513e-11	1.84597e-11	1.82227e-11	2.1019e-11	1.81409e-11	2.15184e-11
32.76	1.57127e-11	1.6481e-11		1.72497e-11						2.37184e-11	1.7483e-11	3.81858e-11	1.71846e-11	2.17568e-11	1.8463e-11	1.82247e-11	2.10193e-11	1.81484e-11	2.15187e-11
32.78	1.57213e-11	1.64849e-11		1.72454e-11						2.37203e-11	1.7484e-11	3.81906e-11	1.71944e-11	2.17611e-11	1.84688e-11	1.82282e-11	2.10231e-11	1.81441e-11	2.15234e-11
32.8	1.5714e-11	1.64889e-11		1.72457e-11						2.37147e-11	1.74819e-11	3.81863e-11	1.71849e-11	2.17585e-11	1.8466e-11	1.8226e-11	2.10204e-11	1.81396e-11	2.15296e-11
32.82	1.57155e-11	1.64884e-11		1.72515e-11						2.37251e-11	1.74931e-11	3.81877e-11	1.71971e-11	2.17581e-11	1.84676e-11	1.82228e-11	2.10144e-11	1.81413e-11	2.15299e-11
32.84	1.5727e-11	1.64809e-11		1.72458e-11						2.37189e-11	1.74813e-11	3.81912e-11	1.71874e-11	2.17583e-11	1.84627e-11	1.82241e-11	2.10264e-11	1.81482e-11	2.15262e-11
32.86	1.57166e-11	1.64871e-11		1.72514e-11						2.37111e-11	1.74799e-11	3.8184e-11	1.71807e-11	2.17512e-11	1.84713e-11	1.82234e-11	2.10291e-11	1.81378e-11	2.15254e-11
32.88	1.57138e-11	1.64931e-11		1.72455e-11						2.37166e-11	1.74826e-11	3.81948e-11	1.71968e-11	2.17569e-11	1.8465e-11	1.82244e-11	2.10279e-11	1.81442e-11	2.15207e-11
32.9	1.57304e-11	1.64974e-11		1.72487e-11						2.37155e-11	1.7482e-11	3.81858e-11	1.71913e-11	2.17529e-11	1.84636e-11	1.82248e-11	2.10281e-11	1.81432e-11	2.15191e-11
32.92	1.57179e-11	1.64929e-11		1.72475e-11						2.37151e-11	1.74822e-11	3.81797e-11	1.71944e-11	2.1761e-11	1.84709e-11	1.82322e-11	2.10139e-11	1.81423e-11	2.15237e-11
32.94	1.5726e-11	1.64927e-11		1.72422e-11						2.37163e-11	1.7486e-11	3.81907e-11	1.71895e-11	2.17528e-11	1.84734e-11	1.82191e-11	2.10167e-11	1.81421e-11	2.15304e-11
32.96	1.57177e-11	1.64941e-11		1.72485e-11						2.37158e-11	1.74857e-11	3.81806e-11	1.71851e-11	2.17558e-11	1.84797e-11	1.82247e-11	2.10229e-11	1.81497e-11	2.15271e-11
32.98	1.57223e-11	1.64931e-11		1.72468e-11						2.37189e-11	1.7479e-11	3.81872e-11	1.72025e-11	2.17573e-11	1.84649e-11	1.82158e-11	2.10252e-11	1.81418e-11	2.15288e-11
33	1.57193e-11	1.64987e-11		1.72527e-11						2.37148e-11	1.74797e-11	3.81864e-11	1.71966e-11	2.17517e-11	1.84733e-11	1.82144e-11	2.10266e-11	1.8149e-11	2.1525e-11
33.02	1.57104e-11	1.64917e-11		1.72468e-11						2.37108e-11	1.74885e-11	3.81874e-11	1.71961e-11	2.17556e-11	1.84656e-11	1.82197e-11	2.10257e-11	1.81474e-11	2.15195e-11
33.04	1.57166e-11									2.37162e-11	1.74843e-11	3.81833e-11	1.71996e-11	2.17616e-11	1.84696e-11	1.82125e-11	2.10274e-11	1.8148e-11	2.15273e-11
33.06	1.57133e-11									2.37214e-11	1.74803e-11	3.81874e-11	1.71964e-11	2.17595e-11	1.84793e-11	1.82157e-11	2.10234e-11	1.81417e-11	2.15248e-11
33.08	1.57336e-11									2.37123e-11	1.74795e-11	3.81836e-11	1.72044e-11	2.17615e-11	1.84814e-11	1.82125e-11	2.10335e-11	1.81419e-11	2.15267e-11
33.1	1.57141e-11									2.37149e-11	1.74834e-11	3.81846e-11	1.71862e-11	2.17584e-11	1.84766e-11	1.82121e-11	2.10227e-11	1.81426e-11	2.15268e-11
33.12	1.57229e-11									2.37197e-11	1.74826e-11	3.81828e-11	1.71995e-11	2.17553e-11	1.84757e-11	1.82201e-11	2.10211e-11	1.81405e-11	2.15279e-11
33.14	1.57205e-11									2.37143e-11	1.74813e-11	3.81891e-11	1.71887e-11	2.17583e-11	1.84773e-11	1.82146e-11	2.10266e-11	1.81471e-11	2.15266e-11
33.16	1.57139e-11									2.37102e-11	1.74861e-11	3.8186e-11	1.71843e-11	2.17609e-11	1.84757e-11	1.82118e-11	2.1035e-11	1.8143e-11	2.15259e-11
33.18	1.57045e-11									2.37202e-11	1.74878e-11	3.8179e-11	1.72037e-11	2.17544e-11	1.84725e-11	1.82103e-11	2.10258e-11	1.81448e-11	2.15269e-11
33.2	1.57227e-11									2.37139e-11	1.74831e-11	3.81894e-11	1.71914e-11	2.17562e-11	1.84669e-11	1.82135e-11	2.10248e-11	1.81445e-11	2.15319e-11
33.22	1.57191e-11									2.37123e-11	1.74735e-11	3.81863e-11	1.71757e-11	2.17555e-11	1.84686e-11	1.82094e-11	2.10221e-11	1.81474e-11	2.15274e-11
33.24	1.572e-11									2.37137e-11	1.74731e-11	3.81773e-11	1.71836e-11	2.17598e-11	1.84662e-11	1.82099e-11	2.10273e-11	1.81417e-11	2.1527e-11
33.26	1.57245e-11									2.37126e-11	1.74825e-11	3.81865e-11	1.71851e-11	2.17564e-11	1.84692e-11	1.82114e-11	2.10319e-11	1.81456e-11	2.15306e-11
33.28	1.57197e-11									2.37167e-11	1.74838e-11	3.81895e-11	1.71807e-11	2.17546e-11	1.84605e-11	1.82162e-11	2.10414e-11	1.81568e-11	2.1524e-11
33.3	1.57144e-11									2.37118e-11	1.74786e-11	3.81855e-11	1.71928e-11	2.1765e-11	1.84596e-11	1.821e-11	2.10376e-11	1.81454e-11	2.15256e-11
33.32	1.57226e-11									2.37155e-11	1.74767e-11	3.81855e-11	1.71837e-11	2.17557e-11	1.84629e-11	1.82134e-11	2.10404e-11	1.81424e-11	2.15301e-11
33.34	1.57122e-11									2.37155e-11	1.74767e-11	3.81892e-11	1.71805e-11	2.17586e-11	1.84605e-11	1.8211e-11	2.10332e-11	1.81417e-11	2.15333e-11
33.36	1.57176e-11									2.37145e-11	1.74839e-11	3.81912e-11	1.71685e-11	2.176e-11	1.84669e-11	1.82099e-11	2.10381e-11	1.81516e-11	2.15276e-11
33.38	1.57104e-11									2.37104e-11	1.74765e-11	3.81771e-11	1.71825e-11	2.17608e-11	1.84557e-11	1.82083e-11	2.10326e-11	1.81476e-11	2.15261e-11
33.4	1.57235e-11									2.37123e-11	1.74805e-11	3.81827e-11	1.71884e-11	2.17516e-11	1.846e-11	1.82119e-11	2.10352e-11	1.81488e-11	2.15204e-11
33.42	1.5716e-11									2.37227e-11	1.7482e-11	3.81863e-11	1.71919e-11	2.17581e-11	1.84596e-11	1.82128e-11	2.10406e-11	1.81489e-11	2.15275e-11
33.44	1.5722e-11									2.37209e-11	1.74763e-11	3.81846e-11	1.71795e-11	2.17622e-11	1.8463e-11	1.82157e-11	2.10447e-11	1.81446e-11	2.15261e-11
33.46	1.57172e-11									2.3713e-11	1.74825e-11	3.81884e-11	1.71924e-11	2.1757e-11	1.8457e-11	1.82096e-11	2.10477e-11	1.81511e-11	2.15289e-11
33.48	1.57212e-11									2.37196e-11	1.74832e-11	3.81851e-11	1.71831e-11	2.17624e-11	1.84495e-11	1.82081e-11	2.10366e-11	1.8148e-11	2.15238e-11
33.5	1.57037e-11									2.37135e-11	1.74786e-11	3.81832e-11	1.71965e-11	2.17597e-11	1.84608e-11	1.82128e-11	2.10413e-11	1.8154e-11	2.15265e-11
33.52	1.57157e-11									2.37196e-11	1.74885e-11	3.81828e-11	1.71836e-11	2.17583e-11	1.84647e-11	1.82121e-11	2.10376e-11	1.81507e-11	2.1522e-11
33.54	1.57244e-11									2.37166e-11	1.74874e-11	3.81815e-11	1.7196e-11	2.17584e-11	1.84649e-11	1.82117e-11	2.10426e-11	1.81503e-11	2.15263e-11
33.56	1.57226e-11									2.37156e-11	1.7483e-11	3.81418e-11	1.71857e-11	2.17576e-11	1.84577e-11	1.82154e-11	2.10371e-11	1.81495e-11	2.1526e-11
33.58	1.57164e-11									2.37195e-11	1.74872e-11	3.81588e-11	1.71796e-11	2.17576e-11	1.8454e-11	1.82121e-11	2.10412e-11	1.81555e-11	2.1522e-11
33.6	1.57179e-11									2.37184e-11	1.74829e-11	3.81612e-11	1.71891e-11	2.17566e-11	1.84586e-11	1.82173e-11	2.1043e-11	1.81491e-11	2.15291e-11
33.62	1.57152e-11									2.37141e-11	1.74818e-11	3.79624e-11	1.71879e-11	2.17616e-11	1.84668e-11	1.82152e-11	2.10453e-11	1.81522e-11	2.15329e-11
33.64	1.57173e-11									2.37142e-11	1.74788e-11	3.76918e-11	1.71846e-11	2.17616e-11	1.84689e-11	1.82134e-11	2.10469e-11	1.81517e-11	2.15251e-11
33.66	1.5717e-11									2.37126e-11	1.74891e-11	3.76667e-11	1.71873e-11	2.17549e-11	1.84639e-11	1.82152e-11	2.10432e-11	1.81464e-11	2.15287e-11
33.68	1.57199e-11									2.37108e-11	1.7485e-11	3.76624e-11	1.71968e-11	2.17563e-11	1.84655e-11	1.82075e-11	2.10485e-11	1.8152e-11	2.15178e-11
33.7	1.57126e-11									2.37158e-11	1.7484e-11	3.76672e-11	1.72068e-11	2.1756e-11	1.845e-11	1.82179e-11	2.10479e-11	1.8144e-11	2.15163e-11
33.72	1.57079e-11									2.37157e-11	1.74829e-11	3.76642e-11	1.71988e-11	2.17544e-11	1.84591e-11	1.82168e-11	2.10505e-11	1.81545e-11	2.15299e-11
33.74	1.572e-11									2.37111e-11	1.74848e-11	3.76923e-11	1.71885e-11	2.17518e-11	1.84643e-11	1.82156e-11	2.10443e-11	1.81536e-11	2.15249e-11
33.76	1.57195e-11									2.37154e-11	1.74833e-11	3.77083e-11	1.7197e-11	2.17507e-11	1.84619e-11	1.82112e-11	2.10477e-11	1.8154e-11	2.1529e-11
33.78	1.57112e-11									2.37111e-11	1.748e-11	3.77184e-11	1.71964e-11	2.17564e-11	1.84524e-11	1.82119e-11	2.1048e-11	1.81469e-11	2.15252e-11
33.8	1.57277e-11									2.37202e-11	1.74878e-11	3.77187e-11	1.72017e-11	2.17567e-11	1.845e-11	1.8215e-11	2.1041e-11	1.81475e-11	2.1527e-11
33.82	1.57169e-11									2.37081e-11	1.74805e-11	3.77323e-11	1.71971e-11	2.17596e-11	1.84539e-11	1.82137e-11	2.10468e-11	1.81537e-11	2.15305e-11
33.84	1.57143e-11									2.37162e-11	1.74867e-11	3.77233e-11	1.71868e-11	2.17584e-11	1.84561e-11	1.82071e-11	2.10538e-11	1.81473e-11	2.15306e-11
33.86	1.57187e-11									2.37187e-11	1.74905e-11	3.77311e-11	1.71872e-11	2.17615e-11	1.84569e-11	1.82114e-11	2.10513e-11	1.81586e-11	2.15241e-11
33.88	1.57154e-11									2.37153e-11	1.74825e-11	3.77241e-11	1.71865e-11	2.17623e-11	1.8457e-11	1.82149e-11	2.10579e-11	1.81529e-11	2.15258e-11
33.9	1.57183e-11									2.37172e-11	1.74785e-11	3.77287e-11	1.71972e-11	2.17547e-11	1.84544e-11	1.82139e-11	2.10544e-11	1.81555e-11	2.1529e-11
33.92	1.57213e-11									2.3726e-11	1.7481e-11	3.77197e-11	1.7195e-11	2.1759e-11	1.84564e-11	1.82178e-11	2.10573e-11	1.81565e-11	2.15295e-11
33.94	1.57276e-11									2.37162e-11	1.74852e-11	3.77244e-11	1.71929e-11	2.17615e-11	1.84551e-11	1.82101e-11	2.10564e-11	1.81502e-11	2.15272e-11
33.96	1.57248e-11									2.37169e-11	1.74883e-11	3.77355e-11	1.7193e-11	2.17611e-11	1.84541e-11	1.82142e-11	2.10569e-11	1.81676e-11	2.15153e-11
33.98	1.57247e-11									2.37155e-11	1.74769e-11	3.77272e-11	1.71852e-11	2.17558e-11	1.84497e-11	1.82123e-11	2.10502e-11	1.81541e-11	2.15299e-11
34	1.57153e-11									2.37134e-11	1.7487e-11	3.77301e-11	1.71937e-11	2.17568e-11	1.84532e-11	1.82159e-11	2.10494e-11	1.81567e-11	2.15283e-11
34.02	1.57215e-11									2.3716e-11	1.74757e-11	3.77317e-11	1.71925e-11	2.17544e-11	1.84509e-11	1.82094e-11	2.10468e-11	1.81557e-11	2.15315e-11
34.04	1.57238e-11									2.37131e-11	1.74798e-11	3.77242e-11	1.71959e-11	2.17544e-11	1.84662e-11	1.82111e-11	2.10547e-11	1.81549e-11	2.15258e-11
34.06	1.57213e-11									2.37249e-11	1.74839e-11	3.7717e-11	1.71926e-11	2.17541e-11	1.84559e-11	1.82224e-11	2.10552e-11	1.81603e-11	2.15217e-11
34.08	1.57162e-11									2.37205e-11	1.74827e-11	3.77314e-11	1.72017e-11	2.17569e-11	1.84509e-11	1.82129e-11	2.10412e-11	1.81579e-11	2.15203e-11
34.1	1.57128e-11									2.37201e-11	1.74794e-11	3.773e-11	1.71938e-11	2.17562e-11	1.84599e-11	1.82154e-11	2.10516e-11	1.81525e-11	2.15236e-11
34.12	1.57146e-11									2.37178e-11	1.7479e-11	3.77205e-11	1.7185e-11	2.17589e-11	1.84615e-11	1.82163e-11	2.10536e-11	1.8161e-11	2.15315e-11
34.14	1.57232e-11									2.37164e-11	1.74719e-11	3.77188e-11	1.71847e-11	2.17586e-11	1.84586e-11	1.82147e-11	2.10536e-11	1.81613e-11	2.15179e-11
34.16	1.57072e-11									2.3721e-11	1.74844e-11	3.77343e-11	1.71879e-11	2.17656e-11	1.84565e-11	1.8216e-11	2.10553e-11	1.8152e-11	2.1521e-11
34.18	1.57136e-11									2.37237e-11	1.74832e-11	3.77155e-11	1.71833e-11	2.17574e-11	1.84619e-11	1.8213e-11	2.10603e-11	1.81613e-11	2.15278e-11
34.2	1.57164e-11									2.37203e-11	1.74818e-11	3.77227e-11	1.72125e-11	2.1757e-11	1.84571e-11	1.8215e-11	2.10621e-11	1.8155e-11	2.15282e-11
34.22	1.57238e-11									2.37247e-11	1.74823e-11	3.77228e-11	1.72183e-11	2.17564e-11	1.84593e-11	1.82122e-11	2.10584e-11	1.81562e-11	2.15319e-11
34.24	1.57134e-11									2.37246e-11	1.74866e-11	3.77137e-11	1.7206e-11	2.17587e-11	1.84578e-11	1.82115e-11	2.10542e-11	1.81558e-11	2.15286e-11
34.26	1.57159e-11									2.37215e-11	1.74776e-11	3.77213e-11	1.72199e-11	2.17575e-11	1.846e-11	1.82159e-11	2.10565e-11	1.8161e-11	2.15303e-11
34.28	1.57097e-11									2.37304e-11	1.74842e-11	3.77257e-11	1.72155e-11	2.1758e-11	1.84613e-11	1.82074e-11	2.10509e-11	1.81589e-11	2.1527e-11
34.3	1.57125e-11									2.37253e-11	1.74839e-11	3.77199e-11	1.71982e-11	2.17549e-11	1.84575e-11	1.82098e-11	2.10601e-11	1.81575e-11	2.15286e-11
34.32	1.57224e-11									2.37213e-11	1.74814e-11	3.77221e-11	1.72073e-11	2.1762e-11	1.84599e-11	1.8213e-11	2.1048e-11	1.8157e-11	2.15279e-11
34.34	1.57189e-11									2.37215e-11	1.74808e-11	3.77153e-11	1.72016e-11	2.1756e-11	1.84631e-11	1.82111e-11	2.106e-11	1.81597e-11	2.15279e-11
34.36	1.57165e-11									2.37207e-11	1.74839e-11	3.77113e-11	1.71841e-11	2.17595e-11	1.84603e-11	1.82158e-11	2.10641e-11	1.81634e-11	2.15298e-11
34.38	1.57135e-11									2.37149e-11	1.74839e-11	3.77077e-11	1.71947e-11	2.17608e-11	1.8453e-11	1.8214e-11	2.10599e-11	1.81652e-11	2.15283e-11
34.4	1.57119e-11									2.37214e-11	1.74832e-11	3.77175e-11	1.71946e-11	2.17526e-11	1.84569e-11	1.82143e-11	2.10587e-11	1.81631e-11	2.1524e-11
34.42	1.57063e-11									2.37208e-11	1.74785e-11	3.77166e-11	1.71989e-11	2.17666e-11	1.84575e-11	1.82155e-11	2.10609e-11	1.81645e-11	2.15277e-11
34.44	1.57168e-11									2.37197e-11	1.74783e-11	3.77194e-11	1.71798e-11	2.17592e-11	1.8462e-11	1.82145e-11	2.10673e-11	1.81662e-11	2.15217e-11
34.46	1.57217e-11									2.37268e-11	1.74797e-11	3.77058e-11	1.71943e-11	2.17638e-11	1.8457e-11	1.82117e-11	2.10634e-11	1.81624e-11	2.15204e-11
34.48	1.57121e-11									2.37253e-11	1.74821e-11	3.77098e-11	1.71801e-11	2.1756e-11	1.84614e-11	1.82129e-11	2.10606e-11	1.81659e-11	2.15268e-11
34.5	1.57162e-11									2.37234e-11	1.74781e-11	3.7715e-11	1.72013e-11	2.17638e-11	1.84505e-11	1.82164e-11	2.10647e-11	1.8161e-11	2.1522e-11
34.52	1.57223e-11									2.37167e-11	1.74838e-11	3.77115e-11	1.71724e-11	2.17587e-11	1.84613e-11	1.82152e-11	2.1057e-11	1.815e-11	2.15278e-11
34.54	1.57185e-11									2.37236e-11	1.7487e-11	3.77111e-11	1.71825e-11	2.17623e-11	1.84577e-11	1.82163e-11	2.10612e-11	1.81591e-11	2.15295e-11
34.56	1.57232e-11									2.37237e-11	1.74816e-11	3.77129e-11	1.71878e-11	2.17569e-11	1.84529e-11	1.8213e-11	2.10616e-11	1.81686e-11	2.15303e-11
34.58	1.57151e-11									2.37263e-11	1.74837e-11	3.77221e-11	1.72e-11	2.17536e-11	1.84545e-11	1.8211e-11	2.10695e-11	1.81636e-11	2.15287e-11
34.6	1.57134e-11									2.37195e-11	1.74852e-11	3.77082e-11	1.71974e-11	2.17629e-11	1.84463e-11	1.8216e-11	2.10595e-11	1.81608e-11	2.15223e-11
34.62	1.57153e-11									2.37233e-11	1.748e-11	3.77121e-11	1.72076e-11	2.17595e-11	1.84618e-11	1.82165e-11	2.10654e-11	1.8162e-11	2.15267e-11
34.64	1.57291e-11									2.37234e-11	1.74862e-11	3.77127e-11	1.71934e-11	2.17572e-11	1.84603e-11	1.82162e-11	2.10623e-11	1.81683e-11	2.15366e-11
34.66	1.57226e-11									2.37224e-11	1.74798e-11	3.77154e-11	1.71922e-11	2.17634e-11	1.84655e-11	1.8216e-11	2.10667e-11	1.8168e-11	2.1529e-11
34.68	1.57181e-11									2.37229e-11	1.74745e-11	3.77054e-11	1.7193e-11	2.17683e-11	1.84605e-11	1.82146e-11	2.10551e-11	1.81617e-11	2.15269e-11
34.7	1.57248e-11									2.37251e-11	1.74822e-11	3.77126e-11	1.71973e-11	2.17599e-11	1.84566e-11	1.82099e-11	2.10699e-11	1.81643e-11	2.15281e-11
34.72	1.57216e-11									2.37249e-11	1.7477e-11	3.7706e-11	1.72092e-11	2.1758e-11	1.84585e-11	1.82135e-11	2.10637e-11	1.81607e-11	2.15284e-11
34.74	1.57196e-11									2.37313e-11	1.74837e-11	3.7717e-11	1.71973e-11	2.17583e-11	1.84586e-11	1.82139e-11	2.10687e-11	1.81612e-11	2.15245e-11
34.76	1.57192e-11									2.37271e-11	1.74794e-11	3.77092e-11	1.72099e-11	2.17574e-11	1.84516e-11	1.82183e-11	2.10692e-11	1.81688e-11	2.15287e-11
34.78	1.57128e-11									2.37246e-11	1.74773e-11	3.77007e-11	1.72026e-11	2.17586e-11	1.84525e-11	1.82161e-11	2.10567e-11	1.81657e-11	2.15256e-11
34.8	1.5715e-11									2.373e-11	1.74808e-11	3.77126e-11	1.72035e-11	2.17618e-11	1.84511e-11	1.8219e-11	2.10635e-11	1.81646e-11	2.1529e-11
34.82	1.57015e-11									2.37258e-11	1.7481e-11	3.77056e-11	1.72031e-11	2.17611e-11	1.84616e-11	1.82153e-11	2.10629e-11	1.8171e-11	2.15341e-11
34.84	1.57194e-11									2.3729e-11	1.74761e-11	3.77071e-11	1.7216e-11	2.17626e-11	1.84498e-11	1.82146e-11	2.106e-11	1.81629e-11	2.1528e-11
34.86	1.57189e-11									2.3728e-11	1.74806e-11	3.77077e-11	1.72055e-11	2.17612e-11	1.84653e-11	1.82142e-11	2.1062e-11	1.81633e-11	2.15304e-11
34.88	1.57194e-11									2.37237e-11	1.74798e-11	3.77129e-11	1.71949e-11	2.17594e-11	1.84617e-11	1.82166e-11	2.10694e-11	1.81569e-11	2.15276e-11
34.9	1.57153e-11									2.37252e-11	1.74801e-11	3.77118e-11	1.71981e-11	2.17545e-11	1.84563e-11	1.82152e-11	2.10708e-11	1.81713e-11	2.15293e-11
34.92	1.57269e-11									2.37316e-11	1.74829e-11	3.77082e-11	1.72073e-11	2.1758e-11	1.84567e-11	1.82147e-11	2.10542e-11	1.81644e-11	2.15337e-11
34.94	1.57278e-11									2.37235e-11	1.74844e-11	3.77038e-11	1.72074e-11	2.1757e-11	1.84557e-11	1.82136e-11	2.10671e-11	1.81659e-11	2.15235e-11
34.96	1.57187e-11									2.37249e-11	1.74787e-11	3.77131e-11	1.71982e-11	2.17597e-11	1.84664e-11	1.82135e-11	2.10634e-11	1.8173e-11	2.15247e-11
34.98	1.57211e-11									2.37275e-11	1.7476e-11	3.77123e-11	1.7186e-11	2.17652e-11	1.84595e-11	1.82154e-11	2.10654e-11	1.81694e-11	2.15315e-11
35	1.57152e-11									2.37231e-11	1.74822e-11	3.77096e-11	1.71958e-11	2.17573e-11	1.84544e-11	1.82148e-11	2.10622e-11	1.81666e-11	2.15328e-11
35.02	1.5713e-11									2.37236e-11	1.74838e-11	3.77097e-11	1.72012e-11	2.17571e-11	1.84596e-11	1.82151e-11	2.10684e-11	1.81738e-11	2.15288e-11
35.04	1.57169e-11									2.37268e-11	1.74857e-11	3.77074e-11	1.72035e-11	2.17642e-11	1.84576e-11	1.8215e-11	2.10668e-11	1.81698e-11	2.15264e-11
35.06	1.57119e-11									2.37317e-11	1.74838e-11	3.77057e-11	1.71859e-11	2.1761e-11	1.84628e-11	1.82136e-11	2.10598e-11	1.81683e-11	2.15218e-11
35.08	1.57121e-11									2.37312e-11	1.74852e-11	3.77166e-11	1.72058e-11	2.17599e-11	1.84605e-11	1.82135e-11	2.10659e-11	1.81645e-11	2.15317e-11
35.1	1.57144e-11									2.37244e-11	1.74875e-11	3.77169e-11	1.71931e-11	2.17578e-11	1.84598e-11	1.8215e-11	2.10667e-11	1.8167e-11	2.15299e-11
35.12	1.57204e-11									2.37292e-11	1.74884e-11	3.77112e-11	1.72007e-11	2.17627e-11	1.84579e-11	1.82167e-11	2.10667e-11	1.81664e-11	2.15241e-11
35.14	1.57192e-11									2.37227e-11	1.74784e-11	3.77045e-11	1.71894e-11	2.17595e-11	1.84617e-11	1.82148e-11	2.10727e-11	1.81698e-11	2.15322e-11
35.16	1.57173e-11									2.37347e-11	1.74837e-11	3.77158e-11	1.71848e-11	2.17576e-11	1.84585e-11	1.8214e-11	2.10632e-11	1.81694e-11	2.1532e-11
35.18	1.57125e-11									2.37324e-11	1.74781e-11	3.77103e-11	1.71891e-11	2.17543e-11	1.84523e-11	1.82164e-11	2.10683e-11	1.81761e-11	2.15276e-11
35.2	1.57183e-11									2.37234e-11	1.74832e-11	3.77014e-11	1.71889e-11	2.17589e-11	1.84584e-11	1.82121e-11	2.10698e-11	1.81727e-11	2.15341e-11
35.22	1.57197e-11									2.37341e-11	1.74865e-11	3.77107e-11	1.71927e-11	2.17546e-11	1.84616e-11	1.82164e-11	2.10704e-11	1.8174e-11	2.15294e-11
35.24	1.57212e-11									2.37344e-11	1.74843e-11	3.77184e-11	1.71996e-11	2.17599e-11	1.8459e-11	1.82137e-11	2.10697e-11	1.81729e-11	2.15259e-11
35.26	1.57278e-11									2.37297e-11	1.74827e-11	3.77119e-11	1.71946e-11	2.17583e-11	1.84501e-11	1.82167e-11	2.10702e-11	1.81729e-11	2.15239e-11
35.28	1.57235e-11									2.37361e-11	1.74878e-11	3.77109e-11	1.71967e-11	2.17538e-11	1.84485e-11	1.82155e-11	2.10752e-11	1.81779e-11	2.15252e-11
35.3	1.57195e-11									2.37344e-11	1.74871e-11	3.77129e-11	1.71948e-11	2.17574e-11	1.84575e-11	1.82163e-11	2.10711e-11	1.81767e-11	2.15353e-11
35.32	1.57197e-11									2.37324e-11	1.74882e-11	3.77079e-11	1.71909e-11	2.17571e-11	1.84451e-11	1.8219e-11	2.1072e-11	1.81744e-11	2.15229e-11
35.34	1.57174e-11									2.37369e-11	1.7481e-11	3.77085e-11	1.72032e-11	2.17612e-11	1.84535e-11	1.82167e-11	2.1076e-11	1.8171e-11	2.15328e-11
35.36	1.57141e-11									2.37297e-11	1.74834e-11	3.77042e-11	1.71939e-11	2.17585e-11	1.84547e-11	1.82093e-11	2.10732e-11	1.81721e-11	2.15335e-11
35.38	1.57147e-11									2.3725e-11	1.74892e-11	3.77086e-11	1.71993e-11	2.17576e-11	1.84405e-11	1.82173e-11	2.10686e-11	1.81784e-11	2.15275e-11
35.4	1.57155e-11									2.37281e-11	1.74897e-11	3.77059e-11	1.72001e-11	2.17538e-11	1.84499e-11	1.8221e-11	2.10704e-11	1.81727e-11	2.15359e-11
35.42	1.57071e-11									2.3728e-11	1.74874e-11	3.77076e-11	1.72005e-11	2.17593e-11	1.84525e-11	1.82119e-11	2.10724e-11	1.81756e-11	2.15307e-11
35.44	1.57213e-11									2.3736e-11	1.7485e-11	3.77054e-11	1.72058e-11	2.17571e-11	1.8455e-11	1.82143e-11	2.10693e-11	1.81726e-11	2.153e-11
35.46	1.572e-11									2.3732e-11	1.74858e-11	3.7717e-11	1.71938e-11	2.17593e-11	1.84533e-11	1.82182e-11	2.10706e-11	1.81753e-11	2.15372e-11
35.48	1.5712e-11									2.37305e-11	1.74877e-11	3.77077e-11	1.71922e-11	2.1759e-11	1.84512e-11	1.82193e-11	2.10794e-11	1.81797e-11	2.15286e-11
35.5	1.57202e-11									2.37392e-11	1.74819e-11	3.77118e-11	1.71823e-11	2.17568e-11	1.84523e-11	1.82149e-11	2.10763e-11	1.81785e-11	2.15333e-11
35.52	1.57193e-11									2.37339e-11	1.74814e-11	3.77152e-11	1.72089e-11	2.17555e-11	1.84448e-11	1.82126e-11	2.10697e-11	1.81693e-11	2.15335e-11
35.54	1.57204e-11									2.37346e-11	1.74818e-11	3.7707e-11	1.72037e-11	2.1755e-11	1.84584e-11	1.82184e-11	2.10824e-11	1.81762e-11	2.1537e-11
35.56	1.5726e-11									2.37334e-11	1.74889e-11	3.77088e-11	1.71933e-11	2.17582e-11	1.84557e-11	1.82204e-11	2.10814e-11	1.81776e-11	2.1536e-11
35.58	1.57327e-11									2.37343e-11	1.74804e-11	3.77096e-11	1.71854e-11	2.17525e-11	1.84504e-11	1.82103e-11	2.10687e-11	1.81745e-11	2.15247e-11
35.6	1.57253e-11									2.37314e-11	1.7485e-11	3.77069e-11	1.71984e-11	2.17592e-11	1.84477e-11	1.82138e-11	2.10662e-11	1.8179e-11	2.15316e-11
35.62	1.57299e-11									2.37321e-11	1.74825e-11	3.77001e-11	1.71993e-11	2.17663e-11	1.84566e-11	1.82154e-11	2.10621e-11	1.81766e-11	2.15317e-11
35.64	1.57355e-11									2.37328e-11	1.74877e-11	3.77079e-11	1.72089e-11	2.17607e-11	1.84599e-11	1.82146e-11	2.10665e-11	1.81762e-11	2.15326e-11
35.66	1.57315e-11									2.37368e-11	1.74841e-11	3.76958e-11	1.71993e-11	2.17509e-11	1.84567e-11	1.82156e-11	2.10642e-11	1.81716e-11	2.15313e-11
35.68	1.5728e-11									2.373e-11	1.74842e-11	3.77036e-11	1.72042e-11	2.17572e-11	1.84508e-11	1.82165e-11	2.10668e-11	1.81751e-11	2.15354e-11
35.7	1.57263e-11									2.37359e-11	1.74908e-11	3.76954e-11	1.7209e-11	2.17611e-11	1.84582e-11	1.82171e-11	2.10768e-11	1.81735e-11	2.15338e-11
35.72	1.5728e-11									2.37338e-11	1.74887e-11	3.77054e-11	1.72047e-11	2.17548e-11	1.84509e-11	1.82165e-11	2.1082e-11	1.81793e-11	2.1531e-11
35.74	1.57306e-11									2.37341e-11	1.74871e-11	3.77053e-11	1.72009e-11	2.17487e-11	1.84473e-11	1.8215e-11	2.10723e-11	1.81784e-11	2.15355e-11
35.76	1.57285e-11									2.37341e-11	1.74854e-11	3.77035e-11	1.71925e-11	2.17346e-11	1.84572e-11	1.82184e-11	2.10761e-11	1.81835e-11	2.15337e-11
35.78	1.57291e-11									2.37367e-11	1.74851e-11	3.77104e-11	1.72043e-11	2.17352e-11	1.84498e-11	1.8217e-11	2.10737e-11	1.81783e-11	2.1529e-11
35.8	1.57306e-11									2.37396e-11	1.74884e-11	3.77134e-11	1.71812e-11	2.17371e-11	1.84451e-11	1.8219e-11	2.10754e-11	1.81786e-11	2.15322e-11
35.82	1.57179e-11									2.37367e-11	1.74854e-11	3.77118e-11	1.71838e-11	2.17386e-11	1.84408e-11	1.82203e-11	2.10624e-11	1.81841e-11	2.15362e-11
35.84	1.57258e-11									2.37398e-11	1.74862e-11	3.77044e-11	1.71927e-11	2.17382e-11	1.84476e-11	1.82151e-11	2.10694e-11	1.8181e-11	2.1536e-11
35.86	1.57222e-11									2.37392e-11	1.74908e-11	3.77158e-11	1.71934e-11	2.17367e-11	1.84435e-11	1.82164e-11	2.10624e-11	1.81759e-11	2.15339e-11
35.88	1.57262e-11									2.37378e-11	1.74868e-11	3.77018e-11	1.71927e-11	2.17363e-11	1.84421e-11	1.8217e-11	2.10704e-11	1.81753e-11	2.15387e-11
35.9	1.57228e-11									2.3742e-11	1.7481e-11	3.77077e-11	1.71889e-11	2.17325e-11	1.84403e-11	1.82243e-11	2.10673e-11	1.81807e-11	2.15341e-11
35.92	1.57278e-11									2.37333e-11	1.74815e-11	3.77107e-11	1.7199e-11	2.17356e-11	1.84481e-11	1.82163e-11	2.10716e-11	1.81756e-11	2.15326e-11
35.94	1.5717e-11									2.37362e-11	1.74839e-11	3.76998e-11	1.71949e-11	2.17389e-11	1.84449e-11	1.82157e-11	2.10675e-11	1.81815e-11	2.15293e-11
35.96	1.57236e-11									2.3738e-11	1.74901e-11	3.76975e-11	1.7187e-11	2.17311e-11	1.84492e-11	1.82164e-11	2.10712e-11	1.81783e-11	2.15258e-11
35.98	1.57215e-11									2.37362e-11	1.74877e-11	3.77122e-11	1.71662e-11	2.17339e-11	1.84479e-11	1.82129e-11	2.10774e-11	1.8183e-11	2.15278e-11
36	1.57268e-11									2.37388e-11	1.74888e-11	3.77109e-11	1.71805e-11	2.17274e-11	1.84533e-11	1.82155e-11	2.10617e-11	1.81723e-11	2.15258e-11
36.02	1.57302e-11									2.3737e-11	1.74875e-11	3.76993e-11	1.71909e-11	2.17416e-11	1.84488e-11	1.82183e-11	2.10704e-11	1.8181e-11	2.15299e-11
36.04	1.57197e-11									2.37431e-11	1.74871e-11	3.77087e-11	1.71926e-11	2.17368e-11	1.8453e-11	1.82189e-11	2.10682e-11	1.81838e-11	2.15344e-11
36.06	1.57186e-11									2.37316e-11	1.74854e-11	3.77082e-11	1.71966e-11	2.17383e-11	1.84456e-11	1.82161e-11	2.10759e-11	1.81807e-11	2.15325e-11
36.08	1.57152e-11									2.37402e-11	1.74869e-11	3.7709e-11	1.71935e-11	2.17345e-11	1.84427e-11	1.82149e-11	2.10673e-11	1.81798e-11	2.15211e-11
36.1	1.57154e-11									2.37429e-11	1.74872e-11	3.77119e-11	1.71944e-11	2.17374e-11	1.84582e-11	1.82132e-11	2.10681e-11	1.81771e-11	2.15275e-11
36.12	1.57108e-11									2.37421e-11	1.74883e-11	3.77097e-11	1.71839e-11	2.17297e-11	1.84438e-11	1.82165e-11	2.10747e-11	1.81834e-11	2.15327e-11
36.14	1.57154e-11									2.37456e-11	1.74898e-11	3.77028e-11	1.72e-11	2.17331e-11	1.84467e-11	1.82147e-11	2.107e-11	1.81833e-11	2.15294e-11
36.16	1.57206e-11									2.3744e-11	1.74881e-11	3.77099e-11	1.72093e-11	2.17323e-11	1.84476e-11	1.82126e-11	2.10668e-11	1.81756e-11	2.15225e-11
36.18	1.57136e-11									2.37384e-11	1.74923e-11	3.77044e-11	1.72036e-11	2.17333e-11	1.84485e-11	1.82142e-11	2.107e-11	1.81814e-11	2.15225e-11
36.2	1.57153e-11									2.37507e-11	1.74939e-11	3.77037e-11	1.71948e-11	2.17331e-11	1.84559e-11	1.82174e-11	2.10734e-11	1.81809e-11	2.15215e-11
36.22	1.57293e-11									2.3744e-11	1.74951e-11	3.77076e-11	1.71955e-11	2.1741e-11	1.84571e-11	1.8219e-11	2.10742e-11	1.81843e-11	2.15258e-11
36.24	1.57236e-11									2.3744e-11	1.74931e-11	3.77168e-11	1.71825e-11	2.1735e-11	1.84601e-11	1.82177e-11	2.10757e-11	1.81794e-11	2.15266e-11
36.26	1.57197e-11									2.37355e-11	1.74894e-11	3.76927e-11	1.71819e-11	2.17421e-11	1.8458e-11	1.82164e-11	2.10726e-11	1.81857e-11	2.15254e-11
36.28	1.57253e-11									2.37439e-11	1.7481e-11	3.77188e-11	1.7199e-11	2.17358e-11	1.84522e-11	1.82173e-11	2.10789e-11	1.81889e-11	2.15266e-11
36.3	1.57125e-11									2.37419e-11	1.7499e-11	3.77083e-11	1.71986e-11	2.17323e-11	1.84595e-11	1.82162e-11	2.10652e-11	1.81765e-11	2.15286e-11
36.32	1.5721e-11									2.37374e-11	1.7491e-11	3.77139e-11	1.72029e-11	2.17337e-11	1.84529e-11	1.82185e-11	2.10713e-11	1.81858e-11	2.1524e-11
36.34	1.57136e-11									2.37415e-11	1.74916e-11	3.77054e-11	1.71952e-11	2.17352e-11	1.84498e-11	1.82231e-11	2.10776e-11	1.81879e-11	2.15261e-11
36.36	1.57097e-11									2.37349e-11	1.74884e-11	3.77104e-11	1.72059e-11	2.17348e-11	1.845e-11	1.8216e-11	2.10739e-11	1.81855e-11	2.15228e-11
36.38	1.57118e-11									2.37376e-11	1.74898e-11	3.77135e-11	1.71928e-11	2.17342e-11	1.84571e-11	1.82195e-11	2.10743e-11	1.81837e-11	2.15268e-11
36.4	1.57181e-11									2.37483e-11	1.74925e-11	3.77064e-11	1.71961e-11	2.17374e-11	1.84449e-11	1.82157e-11	2.10775e-11	1.81825e-11	2.15271e-11
36.42	1.57171e-11									2.3738e-11	1.74868e-11	3.7706e-11	1.72006e-11	2.17332e-11	1.84448e-11	1.82155e-11	2.10701e-11	1.81765e-11	2.15299e-11
36.44	1.5722e-11									2.37418e-11	1.74931e-11	3.76989e-11	1.71863e-11	2.17348e-11	1.84448e-11	1.82183e-11	2.10733e-11	1.81908e-11	2.15256e-11
36.46	1.57194e-11									2.37408e-11	1.74914e-11	3.76946e-11	1.72021e-11	2.17414e-11	1.84459e-11	1.82179e-11	2.10774e-11	1.81851e-11	2.15258e-11
36.48	1.57256e-11									2.3743e-11	1.74888e-11	3.77098e-11	1.71954e-11	2.17373e-11	1.84528e-11	1.82147e-11	2.10824e-11	1.81832e-11	2.15272e-11
36.5	1.57215e-11									2.37419e-11	1.74902e-11	3.77024e-11	1.71943e-11	2.17404e-11	1.84449e-11	1.822e-11	2.10739e-11	1.81805e-11	2.15225e-11
36.52	1.57225e-11									2.37514e-11	1.74955e-11	3.77029e-11	1.71994e-11	2.17418e-11	1.84458e-11	1.82157e-11	2.10732e-11	1.81803e-11	2.15283e-11
36.54	1.57137e-11									2.3752e-11	1.7491e-11	3.77e-11	1.71895e-11	2.17437e-11	1.84471e-11	1.82176e-11	2.10618e-11	1.81829e-11	2.15252e-11
36.56	1.5723e-11									2.375e-11	1.74921e-11	3.77011e-11	1.71957e-11	2.17421e-11	1.84512e-11	1.82152e-11	2.10699e-11	1.81892e-11	2.15136e-11
36.58	1.57195e-11									2.37557e-11	1.74878e-11	3.76962e-11	1.71987e-11	2.17398e-11	1.84521e-11	1.8223e-11	2.10607e-11	1.81895e-11	2.1522e-11
36.6	1.57177e-11									2.37544e-11	1.74922e-11	3.76979e-11	1.72012e-11	2.17394e-11	1.84523e-11	1.82192e-11	2.10709e-11	1.81885e-11	2.15266e-11
36.62	1.57102e-11									2.37497e-11	1.74896e-11	3.76954e-11	1.71957e-11	2.17414e-11	1.84516e-11	1.82203e-11	2.1069e-11	1.81852e-11	2.15228e-11
36.64	1.57163e-11									2.37498e-11	1.74983e-11	3.76979e-11	1.71977e-11	2.17378e-11	1.84524e-11	1.82162e-11	2.10751e-11	1.8185e-11	2.1521e-11
36.66	1.57155e-11									2.37479e-11	1.74928e-11	3.76914e-11	1.72069e-11	2.1737e-11	1.84449e-11	1.82152e-11	2.10827e-11	1.81889e-11	2.15171e-11
36.68	1.57146e-11									2.37471e-11	1.74959e-11	3.77047e-11	1.71942e-11	2.17405e-11	1.84549e-11	1.82134e-11	2.10752e-11	1.8185e-11	2.15292e-11
36.7	1.57216e-11									2.37463e-11	1.74943e-11	3.77034e-11	1.72074e-11	2.17362e-11	1.84451e-11	1.82161e-11	2.10739e-11	1.81825e-11	2.15241e-11
36.72	1.57229e-11									2.37507e-11	1.74957e-11	3.76994e-11	1.7205e-11	2.1734e-11	1.84493e-11	1.82205e-11	2.10832e-11	1.81878e-11	2.15244e-11
36.74	1.57135e-11									2.37489e-11	1.74912e-11	3.76997e-11	1.7189e-11	2.17373e-11	1.84537e-11	1.82231e-11	2.10778e-11	1.81833e-11	2.15194e-11
36.76	1.57286e-11									2.37527e-11	1.74991e-11	3.77078e-11	1.72064e-11	2.17403e-11	1.84547e-11	1.82198e-11	2.10805e-11	1.81886e-11	2.15171e-11
36.78	1.57235e-11									2.37556e-11	1.74917e-11	3.76998e-11	1.7199e-11	2.17398e-11	1.84522e-11	1.82162e-11	2.10734e-11	1.81859e-11	2.15077e-11
36.8	1.57203e-11									2.37531e-11	1.74976e-11	3.76909e-11	1.72148e-11	2.17364e-11	1.84505e-11	1.82253e-11	2.10768e-11	1.81827e-11	2.15237e-11
36.82	1.57294e-11									2.37473e-11	1.74947e-11	3.77056e-11	1.7198e-11	2.17318e-11	1.84479e-11	1.82153e-11	2.10807e-11	1.81834e-11	2.15258e-11
36.84	1.57169e-11									2.37526e-11	1.74935e-11	3.77056e-11	1.71934e-11	2.17348e-11	1.84477e-11	1.82215e-11	2.10646e-11	1.81815e-11	2.15254e-11
36.86	1.57234e-11									2.37547e-11	1.74994e-11	3.76992e-11	1.72051e-11	2.17381e-11	1.8447e-11	1.82152e-11	2.10842e-11	1.81863e-11	2.15237e-11
36.88	1.57294e-11									2.37501e-11	1.74967e-11	3.7703e-11	1.72007e-11	2.1732e-11	1.8443e-11	1.82196e-11	2.10831e-11	1.81828e-11	2.15245e-11
36.9	1.57297e-11									2.3753e-11	1.7501e-11	3.76927e-11	1.72074e-11	2.17346e-11	1.84469e-11	1.82153e-11	2.10828e-11	1.81868e-11	2.1527e-11
36.92	1.57288e-11									2.3746e-11	1.74957e-11	3.77005e-11	1.71975e-11	2.1733e-11	1.84577e-11	1.82203e-11	2.10787e-11	1.8186e-11	2.15288e-11
36.94	1.57292e-11									2.375e-11	1.74989e-11	3.77021e-11	1.72031e-11	2.17321e-11	1.84462e-11	1.8221e-11	2.10784e-11	1.81891e-11	2.15238e-11
36.96	1.5721e-11									2.37515e-11	1.74981e-11	3.77008e-11	1.72065e-11	2.17417e-11	1.8443e-11	1.82207e-11	2.10747e-11	1.81819e-11	2.15275e-11
36.98	1.57275e-11									2.37528e-11	1.75002e-11	3.7704e-11	1.71863e-11	2.17375e-11	1.84476e-11	1.82141e-11	2.10816e-11	1.8176e-11	2.15266e-11
37	1.57196e-11									2.3755e-11	1.75002e-11	3.77111e-11	1.72042e-11	2.17355e-11	1.8443e-11	1.82202e-11	2.10771e-11	1.81843e-11	2.15218e-11
37.02	1.57315e-11									2.37525e-11	1.74968e-11	3.77026e-11	1.71916e-11	2.17327e-11	1.84516e-11	1.82208e-11	2.10787e-11	1.81907e-11	2.15238e-11
37.04	1.57154e-11									2.37586e-11	1.75003e-11	3.77071e-11	1.71951e-11	2.17318e-11	1.84531e-11	1.82168e-11	2.10832e-11	1.81755e-11	2.1529e-11
37.06	1.57123e-11									2.37516e-11	1.74968e-11	3.77075e-11	1.72029e-11	2.17324e-11	1.84545e-11	1.82204e-11	2.1075e-11	1.81811e-11	2.15297e-11
37.08	1.57218e-11									2.37516e-11	1.75003e-11	3.7711e-11	1.71945e-11	2.17387e-11	1.8451e-11	1.82196e-11	2.10734e-11	1.81798e-11	2.15192e-11
37.1	1.57165e-11									2.37535e-11	1.75002e-11	3.77086e-11	1.71948e-11	2.17336e-11	1.84484e-11	1.82183e-11	2.10746e-11	1.8179e-11	2.15241e-11
37.12	1.57222e-11									2.37516e-11	1.7504e-11	3.77102e-11	1.72066e-11	2.17392e-11	1.84543e-11	1.82137e-11	2.10806e-11	1.81807e-11	2.15249e-11
37.14	1.57202e-11									2.3754e-11	1.74974e-11	3.77039e-11	1.71937e-11	2.17425e-11	1.8452e-11	1.82204e-11	2.10754e-11	1.81749e-11	2.15318e-11
37.16	1.57223e-11									2.37492e-11	1.74982e-11	3.77051e-11	1.72013e-11	2.1738e-11	1.84555e-11	1.82253e-11	2.10831e-11	1.81796e-11	2.15252e-11
37.18	1.57181e-11									2.37519e-11	1.74999e-11	3.77023e-11	1.71905e-11	2.17356e-11	1.84495e-11	1.82237e-11	2.10771e-11	1.81784e-11	2.15173e-11
37.2	1.57216e-11									2.3752e-11	1.75027e-11	3.77043e-11	1.7189e-11	2.17348e-11	1.84469e-11	1.82205e-11	2.10902e-11	1.81797e-11	2.15276e-11
37.22	1.57221e-11									2.37537e-11	1.7508e-11	3.77003e-11	1.71831e-11	2.17403e-11	1.8446e-11	1.82153e-11	2.10779e-11	1.81706e-11	2.1525e-11
37.24	1.57114e-11									2.37566e-11	1.74963e-11	3.77028e-11	1.71831e-11	2.17433e-11	1.84474e-11	1.82112e-11	2.10796e-11	1.81811e-11	2.15289e-11
37.26	1.5721e-11									2.37551e-11	1.75022e-11	3.77084e-11	1.71836e-11	2.17357e-11	1.84499e-11	1.8219e-11	2.10831e-11	1.81769e-11	2.1526e-11
37.28	1.57187e-11									2.37524e-11	1.75011e-11	3.77144e-11	1.71871e-11	2.17345e-11	1.84464e-11	1.82201e-11	2.10772e-11	1.81801e-11	2.15254e-11
37.3	1.57226e-11									2.3755e-11	1.75016e-11	3.77095e-11	1.71857e-11	2.17365e-11	1.84408e-11	1.82185e-11	2.10855e-11	1.81766e-11	2.15292e-11
37.32	1.57205e-11									2.37573e-11	1.74974e-11	3.77038e-11	1.71832e-11	2.17362e-11	1.84547e-11	1.82195e-11	2.10836e-11	1.81782e-11	2.15165e-11
37.34	1.57228e-11									2.37531e-11	1.75018e-11	3.77018e-11	1.71864e-11	2.17407e-11	1.84507e-11	1.82236e-11	2.10798e-11	1.8179e-11	2.15255e-11
37.36	1.57172e-11									2.37503e-11	1.75049e-11	3.77049e-11	1.72047e-11	2.17376e-11	1.84445e-11	1.82211e-11	2.10831e-11	1.81716e-11	2.15285e-11
37.38	1.57221e-11									2.37601e-11	1.75007e-11	3.77111e-11	1.71886e-11	2.17357e-11	1.84409e-11	1.82155e-11	2.10792e-11	1.81737e-11	2.15151e-11
37.4	1.57064e-11									2.37581e-11	1.74981e-11	3.77026e-11	1.72002e-11	2.17407e-11	1.84495e-11	1.82234e-11	2.10826e-11	1.81786e-11	2.15248e-11
37.42	1.57181e-11									2.37507e-11	1.75051e-11	3.77156e-11	1.71992e-11	2.17364e-11	1.84436e-11	1.82253e-11	2.10741e-11	1.81719e-11	2.1524e-11
37.44	1.57155e-11									2.37542e-11	1.75012e-11	3.76996e-11	1.71997e-11	2.17419e-11	1.84463e-11	1.82205e-11	2.1079e-11	1.81773e-11	2.15246e-11
37.46	1.57265e-11									2.37595e-11	1.75049e-11	3.7702e-11	1.71998e-11	2.17401e-11	1.84479e-11	1.82223e-11	2.10798e-11	1.81706e-11	2.15216e-11
37.48	1.57191e-11									2.37544e-11	1.75011e-11	3.77034e-11	1.72004e-11	2.17376e-11	1.84486e-11	1.82245e-11	2.10849e-11	1.81785e-11	2.15258e-11
37.5	1.57166e-11									2.37582e-11	1.74987e-11	3.77116e-11	1.72155e-11	2.17398e-11	1.844e-11	1.82203e-11	2.1082e-11	1.81795e-11	2.15194e-11
37.52	1.57152e-11									2.37642e-11	1.74988e-11	3.77036e-11	1.72086e-11	2.17379e-11	1.84408e-11	1.82214e-11	2.10832e-11	1.8176e-11	2.15187e-11
37.54	1.57175e-11									2.37556e-11	1.75015e-11	3.77028e-11	1.71947e-11	2.17414e-11	1.84404e-11	1.82198e-11	2.10835e-11	1.81789e-11	2.15235e-11
37.56	1.5726e-11									2.37597e-11	1.75043e-11	3.77079e-11	1.72069e-11	2.17333e-11	1.84499e-11	1.82245e-11	2.10783e-11	1.81811e-11	2.15171e-11
37.58	1.57189e-11									2.37589e-11	1.7506e-11	3.76964e-11	1.7192e-11	2.17369e-11	1.84389e-11	1.82204e-11	2.10788e-11	1.818e-11	2.15303e-11
37.6	1.57169e-11									2.37568e-11	1.75026e-11	3.77061e-11	1.71825e-11	2.17387e-11	1.84443e-11	1.82206e-11	2.10745e-11	1.81699e-11	2.1523e-11
37.62	1.57159e-11									2.37588e-11	1.75071e-11	3.7714e-11	1.72126e-11	2.17307e-11	1.84515e-11	1.82219e-11	2.10752e-11	1.81784e-11	2.15207e-11
37.64	1.5711e-11									2.37537e-11	1.75003e-11	3.7703e-11	1.72011e-11	2.17407e-11	1.84457e-11	1.82198e-11	2.10739e-11	1.81771e-11	2.15243e-11
37.66	1.57166e-11									2.3756e-11	1.75026e-11	3.771e-11	1.72031e-11	2.17318e-11	1.84425e-11	1.82212e-11	2.10742e-11	1.8179e-11	2.15296e-11
37.68	1.5725e-11									2.37569e-11	1.75086e-11	3.76968e-11	1.71991e-11	2.17368e-11	1.84438e-11	1.82258e-11	2.10778e-11	1.81807e-11	2.15304e-11
37.7	1.57222e-11									2.37628e-11	1.75048e-11	3.77037e-11	1.71975e-11	2.17339e-11	1.84439e-11	1.82222e-11	2.10802e-11	1.81774e-11	2.15263e-11
37.72	1.57121e-11									2.37552e-11	1.75012e-11	3.77078e-11	1.72228e-11	2.17364e-11	1.84365e-11	1.82215e-11	2.10885e-11	1.81743e-11	2.15252e-11
37.74	1.57248e-11									2.37621e-11	1.75095e-11	3.77038e-11	1.72007e-11	2.17332e-11	1.84487e-11	1.8219e-11	2.10846e-11	1.81716e-11	2.15286e-11
37.76	1.57228e-11									2.37614e-11	1.75093e-11	3.77113e-11	1.7207e-11	2.17355e-11	1.84423e-11	1.82214e-11	2.10884e-11	1.8176e-11	2.15312e-11
37.78	1.57298e-11									2.3759e-11	1.75067e-11	3.77043e-11	1.71968e-11	2.17433e-11	1.84407e-11	1.8223e-11	2.10759e-11	1.81779e-11	2.15277e-11
37.8	1.57206e-11									2.37649e-11	1.75071e-11	3.77001e-11	1.7199e-11	2.17278e-11	1.84472e-11	1.82213e-11	2.10935e-11	1.81721e-11	2.15254e-11
37.82	1.57151e-11									2.37604e-11	1.75059e-11	3.77183e-11	1.71949e-11	2.17365e-11	1.84434e-11	1.82163e-11	2.10816e-11	1.81686e-11	2.15242e-11
37.84	1.57105e-11									2.37641e-11	1.74996e-11	3.77079e-11	1.71978e-11	2.17386e-11	1.84508e-11	1.82256e-11	2.1075e-11	1.81812e-11	2.15216e-11
37.86	1.57249e-11									2.37607e-11	1.75105e-11	3.77068e-11	1.71927e-11	2.17394e-11	1.84453e-11	1.82229e-11	2.10835e-11	1.81761e-11	2.15245e-11
37.88	1.57283e-11									2.37561e-11	1.75092e-11	3.77075e-11	1.71847e-11	2.17399e-11	1.84457e-11	1.82235e-11	2.10843e-11	1.81709e-11	2.15196e-11
37.9	1.57279e-11									2.37614e-11	1.75045e-11	3.76974e-11	1.71936e-11	2.174e-11	1.84319e-11	1.82219e-11	2.10806e-11	1.81769e-11	2.15218e-11
37.92	1.572e-11									2.37615e-11	1.75054e-11	3.77152e-11	1.71952e-11	2.17369e-11	1.84399e-11	1.82217e-11	2.10863e-11	1.81751e-11	2.15235e-11
37.94	1.57211e-11									2.37696e-11	1.75036e-11	3.77111e-11	1.72052e-11	2.17347e-11	1.84468e-11	1.82171e-11	2.10847e-11	1.81746e-11	2.15277e-11
37.96	1.57193e-11									2.37625e-11	1.75102e-11	3.77045e-11	1.72038e-11	2.17348e-11	1.84437e-11	1.82208e-11	2.1084e-11	1.81717e-11	2.15246e-11
37.98	1.57205e-11									2.37663e-11	1.75071e-11	3.77203e-11	1.71897e-11	2.1738e-11	1.84514e-11	1.82224e-11	2.10801e-11	1.81743e-11	2.15193e-11
38	1.57113e-11									2.37602e-11	1.75115e-11	3.77159e-11	1.72041e-11	2.17379e-11	1.84431e-11	1.82216e-11	2.1089e-11	1.81741e-11	2.1526e-11
38.02	1.57211e-11									2.37677e-11	1.75121e-11	3.77044e-11	1.71988e-11	2.17365e-11	1.84374e-11	1.8224e-11	2.10892e-11	1.81718e-11	2.15337e-11
38.04										2.37631e-11	1.75063e-11	3.77115e-11	1.71937e-11	2.1737e-11	1.84364e-11	1.82208e-11	2.1089e-11	1.81762e-11	2.15211e-11
38.06										2.37651e-11	1.75085e-11	3.77223e-11	1.71975e-11	2.1735e-11	1.84383e-11	1.82231e-11	2.10796e-11	1.81721e-11	2.15293e-11
38.08										2.37643e-11	1.75094e-11	3.77127e-11	1.71928e-11	2.17352e-11	1.84439e-11	1.82251e-11	2.10798e-11	1.81812e-11	2.15175e-11
38.1										2.37679e-11	1.75135e-11	3.77095e-11	1.7193e-11	2.17372e-11	1.84467e-11	1.82205e-11	2.10871e-11	1.81817e-11	2.15209e-11
38.12										2.37717e-11	1.7507e-11	3.77114e-11	1.71889e-11	2.17407e-11	1.84368e-11	1.82193e-11	2.10769e-11	1.81793e-11	2.15237e-11
38.14										2.37607e-11	1.75081e-11	3.77151e-11	1.71846e-11	2.17366e-11	1.84402e-11	1.8218e-11	2.10801e-11	1.81827e-11	2.15263e-11
38.16										2.3769e-11	1.7518e-11	3.77101e-11	1.72059e-11	2.17379e-11	1.84437e-11	1.82264e-11	2.10852e-11	1.8178e-11	2.15176e-11
38.18										2.37623e-11	1.75148e-11	3.77139e-11	1.72034e-11	2.17377e-11	1.84406e-11	1.822e-11	2.10818e-11	1.8183e-11	2.15276e-11
38.2										2.37666e-11	1.7511e-11	3.77037e-11	1.72027e-11	2.17428e-11	1.84383e-11	1.82222e-11	2.10921e-11	1.8174e-11	2.15179e-11
38.22										2.37694e-11	1.75121e-11	3.7711e-11	1.72008e-11	2.17393e-11	1.84435e-11	1.8222e-11	2.10756e-11	1.81762e-11	2.15195e-11
38.24										2.37665e-11	1.75072e-11	3.77068e-11	1.71861e-11	2.17461e-11	1.84439e-11	1.82277e-11	2.10816e-11	1.81762e-11	2.15169e-11
38.26										2.37654e-11	1.75094e-11	3.77098e-11	1.71843e-11	2.1742e-11	1.84431e-11	1.82237e-11	2.10789e-11	1.81687e-11	2.15205e-11
38.28										2.37661e-11	1.75179e-11	3.77127e-11	1.71865e-11	2.17307e-11	1.84379e-11	1.82165e-11	2.10939e-11	1.81794e-11	2.15204e-11
38.3										2.3763e-11	1.75098e-11	3.77071e-11	1.71839e-11	2.17374e-11	1.84465e-11	1.82237e-11	2.10876e-11	1.81782e-11	2.15295e-11
38.32										2.37647e-11	1.75107e-11	3.7718e-11	1.72029e-11	2.17362e-11	1.84506e-11	1.82222e-11	2.10783e-11	1.81823e-11	2.1536e-11
38.34										2.37689e-11	1.75101e-11	3.77087e-11	1.72081e-11	2.17367e-11	1.84411e-11	1.82225e-11	2.10914e-11	1.81694e-11	2.15341e-11
38.36										2.37722e-11	1.75113e-11	3.77136e-11	1.72035e-11	2.17304e-11	1.84356e-11	1.82172e-11	2.10892e-11	1.81831e-11	2.15202e-11
38.38										2.37762e-11	1.75109e-11	3.77161e-11	1.71988e-11	2.17352e-11	1.84434e-11	1.82228e-11	2.10908e-11	1.81804e-11	2.15252e-11
38.4										2.37682e-11	1.75118e-11	3.77182e-11	1.71828e-11	2.17398e-11	1.84471e-11	1.82238e-11	2.1089e-11	1.81798e-11	2.15197e-11
38.42										2.37666e-11	1.75096e-11	3.77096e-11	1.71945e-11	2.17342e-11	1.84453e-11	1.82227e-11	2.10886e-11	1.8176e-11	2.15198e-11
38.44										2.37636e-11	1.75152e-11	3.77123e-11	1.7198e-11	2.17414e-11	1.84489e-11	1.82239e-11	2.10869e-11	1.81793e-11	2.15238e-11
38.46										2.37669e-11	1.75128e-11	3.77196e-11	1.72078e-11	2.17357e-11	1.84453e-11	1.82188e-11	2.10813e-11	1.81822e-11	2.15209e-11
38.48										2.37698e-11	1.75137e-11	3.77089e-11	1.71977e-11	2.17379e-11	1.84503e-11	1.82203e-11	2.10908e-11	1.81836e-11	2.15234e-11
38.5										2.37724e-11	1.75123e-11	3.77084e-11	1.71944e-11	2.17392e-11	1.84605e-11	1.82209e-11	2.10885e-11	1.81803e-11	2.1518e-11
38.52										2.37725e-11	1.75154e-11	3.77116e-11	1.71887e-11	2.17373e-11	1.84482e-11	1.82248e-11	2.10882e-11	1.81794e-11	2.15202e-11
38.54										2.37717e-11	1.75216e-11	3.7717e-11	1.7196e-11	2.1731e-11	1.84562e-11	1.82271e-11	2.10864e-11	1.8181e-11	2.15306e-11
38.56										2.37708e-11	1.75108e-11	3.77169e-11	1.71986e-11	2.17397e-11	1.84464e-11	1.82218e-11	2.10803e-11	1.81822e-11	2.15243e-11
38.58										2.37712e-11	1.75146e-11	3.77145e-11	1.72167e-11	2.17386e-11	1.84505e-11	1.82188e-11	2.10801e-11	1.81803e-11	2.15202e-11
38.6										2.37682e-11	1.75139e-11	3.77135e-11	1.71944e-11	2.17398e-11	1.84434e-11	1.82243e-11	2.108e-11	1.818e-11	2.15228e-11
38.62										2.37653e-11	1.75173e-11	3.77159e-11	1.72057e-11	2.17386e-11	1.84397e-11	1.82195e-11	2.1074e-11	1.81795e-11	2.15181e-11
38.64										2.3768e-11	1.75163e-11	3.77253e-11	1.72061e-11	2.17388e-11	1.84477e-11	1.82241e-11	2.10722e-11	1.81826e-11	2.15271e-11
38.66										2.37723e-11	1.75178e-11	3.77134e-11	1.7192e-11	2.17439e-11	1.84406e-11	1.82203e-11	2.10772e-11	1.81762e-11	2.15208e-11
38.68										2.37744e-11	1.75185e-11	3.7715e-11	1.71898e-11	2.17408e-11	1.84516e-11	1.82248e-11	2.10849e-11	1.81826e-11	2.15258e-11
38.7										2.37712e-11	1.75154e-11	3.77108e-11	1.72023e-11	2.17327e-11	1.84504e-11	1.82204e-11	2.10753e-11	1.81845e-11	2.1532e-11
38.72										2.3776e-11	1.75155e-11	3.77113e-11	1.719e-11	2.17375e-11	1.84379e-11	1.82225e-11	2.10827e-11	1.81852e-11	2.15358e-11
38.74										2.37742e-11	1.75151e-11	3.77201e-11	1.71768e-11	2.17363e-11	1.84441e-11	1.82224e-11	2.10751e-11	1.81739e-11	2.15268e-11
38.76										2.37701e-11	1.7518e-11	3.77165e-11	1.71858e-11	2.17393e-11	1.84488e-11	1.82255e-11	2.10784e-11	1.81789e-11	2.15306e-11
38.78										2.37733e-11	1.75181e-11	3.77142e-11	1.71819e-11	2.17448e-11	1.84484e-11	1.82204e-11	2.10773e-11	1.81803e-11	2.15248e-11
38.8										2.37719e-11	1.75133e-11	3.77194e-11	1.71903e-11	2.17343e-11	1.84405e-11	1.82213e-11	2.10868e-11	1.81816e-11	2.15304e-11
38.82										2.3768e-11	1.75183e-11	3.77154e-11	1.7196e-11	2.17364e-11	1.84463e-11	1.82218e-11	2.1084e-11	1.81767e-11	2.15261e-11
38.84										2.37744e-11	1.75112e-11	3.7721e-11	1.71978e-11	2.17379e-11	1.84382e-11	1.82191e-11	2.1082e-11	1.81833e-11	2.15261e-11
38.86										2.37686e-11	1.7514e-11	3.7711e-11	1.71834e-11	2.17384e-11	1.8453e-11	1.82194e-11	2.10769e-11	1.81827e-11	2.15208e-11
38.88										2.37696e-11	1.75207e-11	3.7721e-11	1.71945e-11	2.17388e-11	1.84486e-11	1.82207e-11	2.10855e-11	1.81871e-11	2.15187e-11
38.9										2.37835e-11	1.75188e-11	3.77132e-11	1.71998e-11	2.1738e-11	1.84436e-11	1.82203e-11	2.10742e-11	1.81808e-11	2.15234e-11
38.92										2.37704e-11	1.75183e-11	3.77201e-11	1.71815e-11	2.17383e-11	1.84449e-11	1.82249e-11	2.10784e-11	1.81809e-11	2.15336e-11
38.94										2.37791e-11	1.75208e-11	3.77195e-11	1.7185e-11	2.17343e-11	1.84509e-11	1.82228e-11	2.10773e-11	1.81796e-11	2.15305e-11
38.96										2.37778e-11	1.75211e-11	3.77207e-11	1.71977e-11	2.17377e-11	1.84487e-11	1.82198e-11	2.10842e-11	1.81811e-11	2.15324e-11
38.98										2.37824e-11	1.75149e-11	3.7718e-11	1.71945e-11	2.17397e-11	1.84433e-11	1.82243e-11	2.10796e-11	1.81767e-11	2.15298e-11
39										2.37763e-11	1.75169e-11	3.77226e-11	1.71962e-11	2.17452e-11	1.84415e-11	1.82224e-11	2.1085e-11	1.81812e-11	2.15301e-11
39.02										2.37744e-11	1.7506e-11	3.77104e-11	1.71989e-11	2.1736e-11	1.84407e-11	1.82276e-11	2.10843e-11	1.8183e-11	2.15257e-11
39.04										2.37746e-11	1.75198e-11	3.77144e-11	1.72049e-11	2.17399e-11	1.84433e-11	1.82218e-11	2.10822e-11	1.81832e-11	2.15258e-11
39.06										2.37812e-11	1.75195e-11	3.77196e-11	1.72043e-11	2.17449e-11	1.84451e-11	1.82253e-11	2.10749e-11	1.81809e-11	2.152e-11
39.08										2.37798e-11	1.75205e-11	3.7726e-11	1.71972e-11	2.17373e-11	1.84386e-11	1.82273e-11	2.10747e-11	1.819e-11	2.15256e-11
[truncated: 9,197 more rows]
