# Supplementary material for: A label-free approach to detect ligand binding to cell surface proteins in real time
Source: eLife journal article supplement (doi:10.7554/elife.34944), 2018-04-26
Supplement: supp [file Fig5i.xlsx]

## Sheet: 16617047-052.abf
	Cm(F)
Time(ms)	100 uM 5-HT	30 uM 5-HT	10 uM 5-HT	3 uM 5-HT	1 uM 5-HT	0.3 uM 5-HT	0.1 uM 5-HT
0.02	1.02037e-11	9.67839e-12	9.65491e-12	1.0069e-11	1.00599e-11	1.07308e-11	1.06468e-11
0.04	1.02091e-11	9.67635e-12	9.65323e-12	1.00762e-11	1.00641e-11	1.07269e-11	1.0656e-11
0.06	1.02e-11	9.67945e-12	9.66076e-12	1.00745e-11	1.00615e-11	1.07271e-11	1.06481e-11
0.08	1.01955e-11	9.68281e-12	9.65557e-12	1.00796e-11	1.00591e-11	1.07253e-11	1.06491e-11
0.1	1.0197e-11	9.67412e-12	9.65662e-12	1.00821e-11	1.00593e-11	1.07346e-11	1.06517e-11
0.12	1.02009e-11	9.68245e-12	9.66072e-12	1.00783e-11	1.00647e-11	1.07305e-11	1.0656e-11
0.14	1.02012e-11	9.68197e-12	9.65716e-12	1.00731e-11	1.00576e-11	1.07308e-11	1.06494e-11
0.16	1.02042e-11	9.68179e-12	9.65224e-12	1.00787e-11	1.00626e-11	1.07202e-11	1.06481e-11
0.18	1.0191e-11	9.67963e-12	9.65506e-12	1.00798e-11	1.00652e-11	1.07289e-11	1.06471e-11
0.2	1.01937e-11	9.6774e-12	9.64826e-12	1.00756e-11	1.00591e-11	1.07257e-11	1.0651e-11
0.22	1.01939e-11	9.68283e-12	9.66192e-12	1.00766e-11	1.006e-11	1.07249e-11	1.06459e-11
0.24	1.02017e-11	9.68108e-12	9.66002e-12	1.00826e-11	1.00632e-11	1.07284e-11	1.06517e-11
0.26	1.02003e-11	9.67288e-12	9.65369e-12	1.0075e-11	1.00612e-11	1.0726e-11	1.06508e-11
0.28	1.02023e-11	9.67715e-12	9.65979e-12	1.00738e-11	1.00596e-11	1.07237e-11	1.06479e-11
0.3	1.01985e-11	9.67982e-12	9.65937e-12	1.00816e-11	1.00617e-11	1.07252e-11	1.06509e-11
0.32	1.01931e-11	9.68384e-12	9.66084e-12	1.00786e-11	1.00674e-11	1.07212e-11	1.065e-11
0.34	1.01972e-11	9.68163e-12	9.65146e-12	1.00753e-11	1.00683e-11	1.07243e-11	1.06528e-11
0.36	1.01976e-11	9.6824e-12	9.66016e-12	1.00766e-11	1.00598e-11	1.07163e-11	1.06502e-11
0.38	1.01894e-11	9.68603e-12	9.66163e-12	1.00849e-11	1.00663e-11	1.07208e-11	1.06446e-11
0.4	1.01945e-11	9.68091e-12	9.65596e-12	1.00714e-11	1.00558e-11	1.07243e-11	1.06516e-11
0.42	1.01972e-11	9.6774e-12	9.66337e-12	1.00787e-11	1.00695e-11	1.07237e-11	1.06465e-11
0.44	1.01932e-11	9.68067e-12	9.6537e-12	1.00787e-11	1.00615e-11	1.07246e-11	1.06503e-11
0.46	1.02001e-11	9.67892e-12	9.6614e-12	1.00757e-11	1.00623e-11	1.07227e-11	1.06475e-11
0.48	1.0193e-11	9.67503e-12	9.66018e-12	1.00839e-11	1.00549e-11	1.07254e-11	1.0653e-11
0.5	1.0204e-11	9.67473e-12	9.65871e-12	1.0081e-11	1.00543e-11	1.07198e-11	1.06474e-11
0.52	1.01958e-11	9.67305e-12	9.65122e-12	1.00754e-11	1.00599e-11	1.07257e-11	1.06515e-11
0.54	1.01993e-11	9.67306e-12	9.65547e-12	1.00774e-11	1.00651e-11	1.0724e-11	1.06535e-11
0.56	1.02035e-11	9.67968e-12	9.65823e-12	1.00766e-11	1.00611e-11	1.07195e-11	1.06571e-11
0.58	1.02013e-11	9.67716e-12	9.65289e-12	1.00767e-11	1.0063e-11	1.07252e-11	1.06566e-11
0.6	1.02015e-11	9.67329e-12	9.6606e-12	1.00755e-11	1.00639e-11	1.07237e-11	1.06521e-11
0.62	1.02047e-11	9.67934e-12	9.65289e-12	1.00776e-11	1.00597e-11	1.07221e-11	1.06518e-11
0.64	1.01979e-11	9.68434e-12	9.66452e-12	1.00758e-11	1.00613e-11	1.0723e-11	1.06545e-11
0.66	1.01948e-11	9.67599e-12	9.65317e-12	1.00821e-11	1.00615e-11	1.07283e-11	1.06529e-11
0.68	1.01946e-11	9.68158e-12	9.6557e-12	1.00813e-11	1.0057e-11	1.07179e-11	1.06564e-11
0.7	1.01965e-11	9.67894e-12	9.64513e-12	1.008e-11	1.00637e-11	1.07259e-11	1.0652e-11
0.72	1.01953e-11	9.67398e-12	9.65035e-12	1.00841e-11	1.00603e-11	1.0716e-11	1.06623e-11
0.74	1.01993e-11	9.68162e-12	9.65785e-12	1.00741e-11	1.00616e-11	1.07216e-11	1.06545e-11
0.76	1.02024e-11	9.67683e-12	9.6559e-12	1.00778e-11	1.00653e-11	1.07236e-11	1.06541e-11
0.78	1.02012e-11	9.67389e-12	9.65446e-12	1.00759e-11	1.00615e-11	1.07263e-11	1.06566e-11
0.8	1.01994e-11	9.6758e-12	9.66016e-12	1.00757e-11	1.00614e-11	1.07264e-11	1.06564e-11
0.82	1.02031e-11	9.68245e-12	9.65589e-12	1.0081e-11	1.00561e-11	1.07227e-11	1.06615e-11
0.84	1.01987e-11	9.67506e-12	9.65785e-12	1.00815e-11	1.00576e-11	1.07292e-11	1.06525e-11
0.86	1.02038e-11	9.6794e-12	9.66574e-12	1.00829e-11	1.00647e-11	1.07274e-11	1.0659e-11
0.88	1.02009e-11	9.6756e-12	9.6614e-12	1.00812e-11	1.00616e-11	1.0727e-11	1.06561e-11
0.9	1.02022e-11	9.68026e-12	9.65509e-12	1.00742e-11	1.00649e-11	1.07248e-11	1.06537e-11
0.92	1.01998e-11	9.67682e-12	9.66273e-12	1.00818e-11	1.00608e-11	1.07279e-11	1.06602e-11
0.94	1.01995e-11	9.67312e-12	9.66355e-12	1.00839e-11	1.00677e-11	1.07226e-11	1.06545e-11
0.96	1.02033e-11	9.67276e-12	9.66167e-12	1.00777e-11	1.00572e-11	1.07242e-11	1.0652e-11
0.98	1.01962e-11	9.67638e-12	9.66345e-12	1.00759e-11	1.00581e-11	1.07212e-11	1.06483e-11
1	1.01996e-11	9.67788e-12	9.66388e-12	1.00746e-11	1.00612e-11	1.07242e-11	1.065e-11
1.02	1.02016e-11	9.68402e-12	9.6571e-12	1.00751e-11	1.00677e-11	1.0727e-11	1.06471e-11
1.04	1.02024e-11	9.68082e-12	9.66468e-12	1.00745e-11	1.00617e-11	1.07221e-11	1.06468e-11
1.06	1.02016e-11	9.67892e-12	9.66238e-12	1.00733e-11	1.00616e-11	1.07233e-11	1.06508e-11
1.08	1.02078e-11	9.68253e-12	9.66332e-12	1.00774e-11	1.00685e-11	1.07241e-11	1.06531e-11
1.1	1.02059e-11	9.68334e-12	9.66125e-12	1.00808e-11	1.00585e-11	1.07193e-11	1.06472e-11
1.12	1.02117e-11	9.68201e-12	9.65714e-12	1.00827e-11	1.0064e-11	1.07255e-11	1.06475e-11
1.14	1.02042e-11	9.685e-12	9.65683e-12	1.00787e-11	1.00588e-11	1.07246e-11	1.06457e-11
1.16	1.0206e-11	9.6836e-12	9.66685e-12	1.00784e-11	1.00611e-11	1.07205e-11	1.06443e-11
1.18	1.01979e-11	9.68127e-12	9.65975e-12	1.00809e-11	1.0064e-11	1.07241e-11	1.0649e-11
1.2	1.02053e-11	9.68232e-12	9.66509e-12	1.00716e-11	1.00615e-11	1.07247e-11	1.06466e-11
1.22	1.0208e-11	9.6791e-12	9.65846e-12	1.00712e-11	1.00603e-11	1.07249e-11	1.06448e-11
1.24	1.02075e-11	9.68452e-12	9.65768e-12	1.00824e-11	1.00642e-11	1.07318e-11	1.06467e-11
1.26	1.0207e-11	9.68154e-12	9.66065e-12	1.00822e-11	1.00656e-11	1.07219e-11	1.06438e-11
1.28	1.02058e-11	9.67162e-12	9.65085e-12	1.00811e-11	1.00673e-11	1.07315e-11	1.06362e-11
1.3	1.02042e-11	9.67749e-12	9.65473e-12	1.0082e-11	1.00583e-11	1.07259e-11	1.06454e-11
1.32	1.02046e-11	9.67438e-12	9.6582e-12	1.00687e-11	1.00672e-11	1.07313e-11	1.06358e-11
1.34	1.01998e-11	9.68198e-12	9.65539e-12	1.00795e-11	1.0069e-11	1.07321e-11	1.0647e-11
1.36	1.02053e-11	9.67439e-12	9.65216e-12	1.00829e-11	1.00625e-11	1.07236e-11	1.06451e-11
1.38	1.02033e-11	9.67669e-12	9.65997e-12	1.00783e-11	1.0066e-11	1.07272e-11	1.06469e-11
1.4	1.02053e-11	9.67564e-12	9.65611e-12	1.00798e-11	1.00614e-11	1.07215e-11	1.06459e-11
1.42	1.0202e-11	9.66907e-12	9.6572e-12	1.00736e-11	1.00572e-11	1.07273e-11	1.06441e-11
1.44	1.02e-11	9.67918e-12	9.65366e-12	1.00794e-11	1.00574e-11	1.07262e-11	1.06487e-11
1.46	1.01985e-11	9.67706e-12	9.65989e-12	1.00787e-11	1.00592e-11	1.07295e-11	1.06471e-11
1.48	1.0202e-11	9.67814e-12	9.65988e-12	1.00845e-11	1.00563e-11	1.07245e-11	1.06544e-11
1.5	1.02015e-11	9.67952e-12	9.66245e-12	1.00758e-11	1.00677e-11	1.07203e-11	1.06553e-11
1.52	1.02015e-11	9.68199e-12	9.65836e-12	1.00796e-11	1.00706e-11	1.07313e-11	1.06504e-11
1.54	1.02063e-11	9.68383e-12	9.65864e-12	1.00781e-11	1.00592e-11	1.07241e-11	1.06488e-11
1.56	1.01988e-11	9.6831e-12	9.65845e-12	1.00795e-11	1.00577e-11	1.07281e-11	1.06523e-11
1.58	1.01998e-11	9.68159e-12	9.66272e-12	1.00779e-11	1.00609e-11	1.07251e-11	1.06523e-11
1.6	1.02046e-11	9.68312e-12	9.6616e-12	1.00828e-11	1.00612e-11	1.07272e-11	1.06521e-11
1.62	1.02033e-11	9.67993e-12	9.65673e-12	1.00826e-11	1.00609e-11	1.07288e-11	1.06512e-11
1.64	1.02089e-11	9.68625e-12	9.66374e-12	1.0087e-11	1.00593e-11	1.07257e-11	1.06562e-11
1.66	1.01989e-11	9.68327e-12	9.66648e-12	1.00782e-11	1.00657e-11	1.07234e-11	1.0654e-11
1.68	1.02104e-11	9.68299e-12	9.65791e-12	1.00834e-11	1.00658e-11	1.07247e-11	1.06498e-11
1.7	1.02067e-11	9.67452e-12	9.66082e-12	1.00812e-11	1.00621e-11	1.07274e-11	1.06542e-11
1.72	1.02074e-11	9.68411e-12	9.65741e-12	1.00837e-11	1.00608e-11	1.07221e-11	1.06513e-11
1.74	1.0208e-11	9.68081e-12	9.66076e-12	1.0079e-11	1.00654e-11	1.07251e-11	1.06555e-11
1.76	1.02073e-11	9.68331e-12	9.66293e-12	1.00823e-11	1.0064e-11	1.07273e-11	1.06502e-11
1.78	1.02034e-11	9.68086e-12	9.66463e-12	1.00758e-11	1.00576e-11	1.07274e-11	1.06462e-11
1.8	1.02016e-11	9.68307e-12	9.66204e-12	1.00786e-11	1.00698e-11	1.07223e-11	1.06543e-11
1.82	1.02033e-11	9.67362e-12	9.66522e-12	1.00768e-11	1.00619e-11	1.0728e-11	1.06486e-11
1.84	1.02022e-11	9.67542e-12	9.6643e-12	1.00787e-11	1.00655e-11	1.07268e-11	1.06536e-11
1.86	1.02014e-11	9.6793e-12	9.66773e-12	1.00786e-11	1.00644e-11	1.07262e-11	1.06532e-11
1.88	1.01984e-11	9.68322e-12	9.66336e-12	1.00761e-11	1.00641e-11	1.07301e-11	1.06521e-11
1.9	1.02078e-11	9.68097e-12	9.66387e-12	1.00862e-11	1.00586e-11	1.0728e-11	1.06518e-11
1.92	1.02032e-11	9.67777e-12	9.66509e-12	1.00829e-11	1.00692e-11	1.07305e-11	1.06509e-11
1.94	1.02054e-11	9.66865e-12	9.66686e-12	1.008e-11	1.00664e-11	1.0728e-11	1.06522e-11
1.96	1.02053e-11	9.67037e-12	9.66403e-12	1.00765e-11	1.00583e-11	1.07274e-11	1.06544e-11
1.98	1.02042e-11	9.67265e-12	9.66557e-12	1.00749e-11	1.0064e-11	1.073e-11	1.06545e-11
2	1.02102e-11	9.67111e-12	9.65716e-12	1.00865e-11	1.00667e-11	1.07308e-11	1.06446e-11
2.02	1.02013e-11	9.67632e-12	9.66753e-12	1.00817e-11	1.00699e-11	1.07286e-11	1.06512e-11
2.04	1.02108e-11	9.66936e-12	9.66847e-12	1.00808e-11	1.00602e-11	1.073e-11	1.06525e-11
2.06	1.02026e-11	9.67765e-12	9.6689e-12	1.00817e-11	1.00666e-11	1.07283e-11	1.06529e-11
2.08	1.02065e-11	9.66781e-12	9.66532e-12	1.00845e-11	1.0068e-11	1.07334e-11	1.06515e-11
2.1	1.02035e-11	9.67009e-12	9.66866e-12	1.00831e-11	1.00623e-11	1.07253e-11	1.06537e-11
2.12	1.02079e-11	9.67473e-12	9.66547e-12	1.00796e-11	1.00598e-11	1.07303e-11	1.06499e-11
2.14	1.01998e-11	9.67643e-12	9.66889e-12	1.00728e-11	1.00656e-11	1.0734e-11	1.06533e-11
2.16	1.02046e-11	9.66657e-12	9.6672e-12	1.00767e-11	1.00633e-11	1.07275e-11	1.06521e-11
2.18	1.02025e-11	9.67061e-12	9.6661e-12	1.00806e-11	1.0061e-11	1.07329e-11	1.06525e-11
2.2	1.0207e-11	9.67728e-12	9.66678e-12	1.00769e-11	1.00692e-11	1.07263e-11	1.06501e-11
2.22	1.0202e-11	9.67713e-12	9.66025e-12	1.00803e-11	1.00595e-11	1.07304e-11	1.06508e-11
2.24	1.02045e-11	9.67787e-12	9.66627e-12	1.00808e-11	1.00646e-11	1.0727e-11	1.06546e-11
2.26	1.0205e-11	9.67182e-12	9.66493e-12	1.00816e-11	1.00627e-11	1.07295e-11	1.0655e-11
2.28	1.01976e-11	9.67177e-12	9.66318e-12	1.00863e-11	1.00625e-11	1.07253e-11	1.06536e-11
2.3	1.02129e-11	9.67121e-12	9.66617e-12	1.00767e-11	1.00674e-11	1.0728e-11	1.06585e-11
2.32	1.02065e-11	9.6708e-12	9.66156e-12	1.00854e-11	1.00665e-11	1.07321e-11	1.06495e-11
2.34	1.01982e-11	9.67819e-12	9.66191e-12	1.00779e-11	1.00647e-11	1.07307e-11	1.06567e-11
2.36	1.02088e-11	9.67155e-12	9.66742e-12	1.00802e-11	1.00615e-11	1.0729e-11	1.06523e-11
2.38	1.01942e-11	9.67131e-12	9.66583e-12	1.00864e-11	1.00656e-11	1.07293e-11	1.06552e-11
2.4	1.02024e-11	9.67849e-12	9.66206e-12	1.00768e-11	1.00631e-11	1.0729e-11	1.06545e-11
2.42	1.02062e-11	9.67835e-12	9.65914e-12	1.00785e-11	1.00646e-11	1.07329e-11	1.06488e-11
2.44	1.02052e-11	9.6773e-12	9.66193e-12	1.00762e-11	1.00682e-11	1.07256e-11	1.06496e-11
2.46	1.01987e-11	9.67553e-12	9.6637e-12	1.00763e-11	1.00686e-11	1.07296e-11	1.06513e-11
2.48	1.02024e-11	9.67922e-12	9.66603e-12	1.00831e-11	1.00633e-11	1.07289e-11	1.06514e-11
2.5	1.02019e-11	9.67933e-12	9.66572e-12	1.00871e-11	1.00596e-11	1.07332e-11	1.0653e-11
2.52	1.01995e-11	9.67788e-12	9.66688e-12	1.00812e-11	1.00597e-11	1.07245e-11	1.06512e-11
2.54	1.02037e-11	9.67955e-12	9.66502e-12	1.0079e-11	1.00658e-11	1.07331e-11	1.06566e-11
2.56	1.02058e-11	9.67706e-12	9.65901e-12	1.0086e-11	1.00607e-11	1.0728e-11	1.06568e-11
2.58	1.02037e-11	9.67587e-12	9.66282e-12	1.00828e-11	1.00584e-11	1.07298e-11	1.06551e-11
2.6	1.02037e-11	9.67621e-12	9.66625e-12	1.0079e-11	1.00635e-11	1.07327e-11	1.06556e-11
2.62	1.01997e-11	9.67544e-12	9.66221e-12	1.00848e-11	1.00673e-11	1.07223e-11	1.06514e-11
2.64	1.02001e-11	9.66906e-12	9.65657e-12	1.0076e-11	1.00638e-11	1.07365e-11	1.06482e-11
2.66	1.02028e-11	9.67007e-12	9.66765e-12	1.00824e-11	1.00651e-11	1.07353e-11	1.06499e-11
2.68	1.02079e-11	9.67592e-12	9.65926e-12	1.00798e-11	1.0057e-11	1.07319e-11	1.06495e-11
2.7	1.02064e-11	9.67218e-12	9.6578e-12	1.00775e-11	1.00631e-11	1.07324e-11	1.06556e-11
2.72	1.02099e-11	9.68036e-12	9.66323e-12	1.00832e-11	1.0066e-11	1.07331e-11	1.06536e-11
2.74	1.02053e-11	9.66763e-12	9.66881e-12	1.00815e-11	1.00677e-11	1.07294e-11	1.06503e-11
2.76	1.02066e-11	9.66573e-12	9.66263e-12	1.00799e-11	1.00664e-11	1.07357e-11	1.06535e-11
2.78	1.0207e-11	9.67212e-12	9.65934e-12	1.00795e-11	1.00638e-11	1.07336e-11	1.06564e-11
2.8	1.0209e-11	9.67168e-12	9.66322e-12	1.00797e-11	1.00676e-11	1.0736e-11	1.06515e-11
2.82	1.02067e-11	9.66793e-12	9.66564e-12	1.00813e-11	1.00692e-11	1.07304e-11	1.06504e-11
2.84	1.02019e-11	9.67713e-12	9.66204e-12	1.00825e-11	1.00684e-11	1.07311e-11	1.06551e-11
2.86	1.02015e-11	9.66719e-12	9.65894e-12	1.00866e-11	1.00681e-11	1.07368e-11	1.06585e-11
2.88	1.02025e-11	9.67722e-12	9.6523e-12	1.0082e-11	1.00685e-11	1.07327e-11	1.06576e-11
2.9	1.02023e-11	9.67165e-12	9.65582e-12	1.00851e-11	1.00633e-11	1.07362e-11	1.06572e-11
2.92	1.02055e-11	9.67209e-12	9.66021e-12	1.00874e-11	1.00689e-11	1.07364e-11	1.06584e-11
2.94	1.02065e-11	9.67079e-12	9.65517e-12	1.00841e-11	1.00704e-11	1.07304e-11	1.06573e-11
2.96	1.02102e-11	9.67046e-12	9.652e-12	1.00834e-11	1.00604e-11	1.07284e-11	1.06549e-11
2.98	1.02099e-11	9.6709e-12	9.65059e-12	1.00793e-11	1.00657e-11	1.07341e-11	1.06545e-11
3	1.02023e-11	9.6675e-12	9.64515e-12	1.00878e-11	1.00684e-11	1.07309e-11	1.06551e-11
3.02	1.02022e-11	9.6778e-12	9.6493e-12	1.00859e-11	1.00633e-11	1.07346e-11	1.06535e-11
3.04	1.02036e-11	9.67058e-12	9.65746e-12	1.00834e-11	1.00598e-11	1.07316e-11	1.06555e-11
3.06	1.02079e-11	9.67668e-12	9.65496e-12	1.00801e-11	1.00678e-11	1.07347e-11	1.06543e-11
3.08	1.02106e-11	9.67146e-12	9.65467e-12	1.00858e-11	1.00623e-11	1.0731e-11	1.06558e-11
3.1	1.02026e-11	9.68689e-12	9.64808e-12	1.00881e-11	1.007e-11	1.07335e-11	1.06532e-11
3.12	1.0203e-11	9.68092e-12	9.65069e-12	1.00893e-11	1.00673e-11	1.07332e-11	1.06568e-11
3.14	1.01985e-11	9.67937e-12	9.64934e-12	1.00829e-11	1.00599e-11	1.07289e-11	1.0655e-11
3.16	1.02056e-11	9.67795e-12	9.65859e-12	1.00824e-11	1.00674e-11	1.07377e-11	1.06569e-11
3.18	1.01994e-11	9.67817e-12	9.65407e-12	1.00856e-11	1.00705e-11	1.0732e-11	1.06537e-11
3.2	1.01998e-11	9.67718e-12	9.65634e-12	1.00761e-11	1.0062e-11	1.07348e-11	1.06559e-11
3.22	1.02044e-11	9.68023e-12	9.65217e-12	1.00862e-11	1.00698e-11	1.07312e-11	1.06519e-11
3.24	1.01989e-11	9.67937e-12	9.65561e-12	1.00852e-11	1.00656e-11	1.0735e-11	1.06528e-11
3.26	1.01982e-11	9.67593e-12	9.65734e-12	1.00848e-11	1.0062e-11	1.07317e-11	1.06585e-11
3.28	1.02069e-11	9.68328e-12	9.65641e-12	1.0082e-11	1.00724e-11	1.07384e-11	1.06544e-11
3.3	1.01994e-11	9.6776e-12	9.65521e-12	1.00856e-11	1.00652e-11	1.07305e-11	1.06551e-11
3.32	1.02089e-11	9.67777e-12	9.65871e-12	1.00872e-11	1.00644e-11	1.07298e-11	1.0651e-11
3.34	1.02004e-11	9.6804e-12	9.65674e-12	1.00788e-11	1.00683e-11	1.07311e-11	1.06528e-11
3.36	1.01995e-11	9.67872e-12	9.64998e-12	1.00856e-11	1.00673e-11	1.07339e-11	1.06506e-11
3.38	1.02037e-11	9.67781e-12	9.66126e-12	1.0092e-11	1.00694e-11	1.07343e-11	1.06552e-11
3.4	1.02045e-11	9.679e-12	9.65774e-12	1.00802e-11	1.00637e-11	1.07371e-11	1.06499e-11
3.42	1.02009e-11	9.68337e-12	9.65705e-12	1.00793e-11	1.00648e-11	1.07275e-11	1.06492e-11
3.44	1.02087e-11	9.67905e-12	9.66112e-12	1.00789e-11	1.00642e-11	1.07364e-11	1.06509e-11
3.46	1.02035e-11	9.68154e-12	9.66499e-12	1.00844e-11	1.00642e-11	1.07349e-11	1.06526e-11
3.48	1.02009e-11	9.68531e-12	9.66108e-12	1.00889e-11	1.00723e-11	1.074e-11	1.06538e-11
3.5	1.02077e-11	9.67534e-12	9.6569e-12	1.00853e-11	1.00709e-11	1.07381e-11	1.06527e-11
3.52	1.02041e-11	9.6882e-12	9.65971e-12	1.00799e-11	1.00631e-11	1.07315e-11	1.06453e-11
3.54	1.02026e-11	9.68696e-12	9.65828e-12	1.00859e-11	1.00698e-11	1.07344e-11	1.06597e-11
3.56	1.0205e-11	9.6832e-12	9.65462e-12	1.00849e-11	1.00681e-11	1.07344e-11	1.06533e-11
3.58	1.02003e-11	9.67716e-12	9.66082e-12	1.0084e-11	1.0065e-11	1.07353e-11	1.06494e-11
3.6	1.02e-11	9.68342e-12	9.65643e-12	1.00861e-11	1.00645e-11	1.07321e-11	1.06531e-11
3.62	1.02024e-11	9.68349e-12	9.66343e-12	1.00845e-11	1.00652e-11	1.07325e-11	1.06497e-11
3.64	1.02051e-11	9.68481e-12	9.65326e-12	1.00875e-11	1.00627e-11	1.07402e-11	1.06494e-11
3.66	1.0198e-11	9.67863e-12	9.65121e-12	1.00825e-11	1.00598e-11	1.07351e-11	1.0654e-11
3.68	1.01955e-11	9.68342e-12	9.65671e-12	1.00817e-11	1.00754e-11	1.07337e-11	1.06481e-11
3.7	1.02005e-11	9.68158e-12	9.65357e-12	1.00833e-11	1.00613e-11	1.07363e-11	1.06554e-11
3.72	1.01976e-11	9.67863e-12	9.65386e-12	1.00837e-11	1.00603e-11	1.07425e-11	1.06525e-11
3.74	1.01998e-11	9.68417e-12	9.66074e-12	1.00801e-11	1.00682e-11	1.07404e-11	1.06534e-11
3.76	1.01958e-11	9.68249e-12	9.66275e-12	1.00908e-11	1.00642e-11	1.07309e-11	1.06518e-11
3.78	1.01871e-11	9.68021e-12	9.66438e-12	1.00833e-11	1.0062e-11	1.07372e-11	1.06491e-11
3.8	1.01908e-11	9.68719e-12	9.65982e-12	1.00848e-11	1.00675e-11	1.07352e-11	1.06591e-11
3.82	1.01961e-11	9.68214e-12	9.65808e-12	1.00856e-11	1.00724e-11	1.07418e-11	1.06514e-11
3.84	1.01948e-11	9.67549e-12	9.66334e-12	1.00885e-11	1.00668e-11	1.07384e-11	1.06578e-11
3.86	1.01982e-11	9.6806e-12	9.66363e-12	1.00843e-11	1.00697e-11	1.07357e-11	1.06521e-11
3.88	1.01934e-11	9.68624e-12	9.6628e-12	1.0079e-11	1.00729e-11	1.07401e-11	1.06593e-11
3.9	1.01935e-11	9.6809e-12	9.65591e-12	1.00797e-11	1.00683e-11	1.07385e-11	1.06479e-11
3.92	1.0192e-11	9.68379e-12	9.65812e-12	1.00823e-11	1.00685e-11	1.07329e-11	1.06476e-11
3.94	1.01947e-11	9.68454e-12	9.65624e-12	1.00858e-11	1.00618e-11	1.07416e-11	1.06487e-11
3.96	1.01917e-11	9.67658e-12	9.66082e-12	1.00815e-11	1.00719e-11	1.07438e-11	1.06504e-11
3.98	1.01979e-11	9.68023e-12	9.66327e-12	1.00804e-11	1.00642e-11	1.07377e-11	1.06513e-11
4	1.01982e-11	9.684e-12	9.65893e-12	1.00798e-11	1.00623e-11	1.07389e-11	1.0652e-11
4.02	1.02035e-11	9.68029e-12	9.6604e-12	1.00814e-11	1.00677e-11	1.0738e-11	1.06503e-11
4.04	1.01934e-11	9.67925e-12	9.65365e-12	1.00844e-11	1.00685e-11	1.07426e-11	1.0653e-11
4.06	1.01981e-11	9.67726e-12	9.65973e-12	1.00828e-11	1.00647e-11	1.07337e-11	1.06543e-11
4.08	1.01926e-11	9.67189e-12	9.65732e-12	1.00749e-11	1.00658e-11	1.0737e-11	1.06554e-11
4.1	1.01952e-11	9.67813e-12	9.65552e-12	1.00833e-11	1.006e-11	1.07367e-11	1.06622e-11
4.12	1.01936e-11	9.68063e-12	9.65518e-12	1.00862e-11	1.00634e-11	1.07371e-11	1.06537e-11
4.14	1.02018e-11	9.68469e-12	9.65377e-12	1.00852e-11	1.00609e-11	1.07414e-11	1.06598e-11
4.16	1.0195e-11	9.68405e-12	9.65585e-12	1.00794e-11	1.00601e-11	1.07355e-11	1.0653e-11
4.18	1.01974e-11	9.68899e-12	9.66014e-12	1.00815e-11	1.00706e-11	1.07359e-11	1.06578e-11
4.2	1.01944e-11	9.68167e-12	9.65843e-12	1.00799e-11	1.00618e-11	1.07356e-11	1.06583e-11
4.22	1.02027e-11	9.67925e-12	9.65523e-12	1.00778e-11	1.00634e-11	1.07368e-11	1.06582e-11
4.24	1.01942e-11	9.68785e-12	9.65965e-12	1.00822e-11	1.00637e-11	1.07359e-11	1.06534e-11
4.26	1.01979e-11	9.67818e-12	9.65436e-12	1.00753e-11	1.00708e-11	1.07367e-11	1.06607e-11
4.28	1.01959e-11	9.67767e-12	9.65817e-12	1.00761e-11	1.00618e-11	1.07326e-11	1.06569e-11
4.3	1.0195e-11	9.67062e-12	9.65401e-12	1.0074e-11	1.00678e-11	1.07371e-11	1.06599e-11
4.32	1.01985e-11	9.67923e-12	9.65325e-12	1.00842e-11	1.00725e-11	1.07345e-11	1.06553e-11
4.34	1.01979e-11	9.68014e-12	9.64907e-12	1.00885e-11	1.00688e-11	1.07411e-11	1.06533e-11
4.36	1.02017e-11	9.68012e-12	9.65342e-12	1.00863e-11	1.00626e-11	1.07369e-11	1.06615e-11
4.38	1.01964e-11	9.68173e-12	9.65232e-12	1.00816e-11	1.00638e-11	1.07345e-11	1.0663e-11
4.4	1.01945e-11	9.67999e-12	9.66253e-12	1.00791e-11	1.0069e-11	1.07417e-11	1.06575e-11
4.42	1.01984e-11	9.67833e-12	9.66512e-12	1.00883e-11	1.00646e-11	1.07357e-11	1.06592e-11
4.44	1.0197e-11	9.68047e-12	9.66457e-12	1.00861e-11	1.00636e-11	1.07392e-11	1.06565e-11
4.46	1.01998e-11	9.67803e-12	9.65954e-12	1.00848e-11	1.00632e-11	1.07361e-11	1.06504e-11
4.48	1.01993e-11	9.6773e-12	9.65949e-12	1.00806e-11	1.00617e-11	1.07355e-11	1.06569e-11
4.5	1.02018e-11	9.67776e-12	9.66325e-12	1.00836e-11	1.00584e-11	1.07394e-11	1.06586e-11
4.52	1.01986e-11	9.68284e-12	9.66343e-12	1.0083e-11	1.00618e-11	1.0737e-11	1.06624e-11
4.54	1.01961e-11	9.67294e-12	9.66145e-12	1.00944e-11	1.00568e-11	1.07386e-11	1.06494e-11
4.56	1.0197e-11	9.68041e-12	9.65271e-12	1.00735e-11	1.00631e-11	1.07374e-11	1.06623e-11
4.58	1.01964e-11	9.67485e-12	9.65318e-12	1.00653e-11	1.00631e-11	1.07367e-11	1.06546e-11
4.6	1.01988e-11	9.6753e-12	9.65667e-12	9.99454e-12	1.00574e-11	1.07351e-11	1.06616e-11
4.62	1.02002e-11	9.67096e-12	9.65557e-12	9.98304e-12	1.00647e-11	1.07313e-11	1.0661e-11
4.64	1.01936e-11	9.67604e-12	9.65341e-12	9.97696e-12	1.00606e-11	1.07351e-11	1.06556e-11
4.66	1.02037e-11	9.67681e-12	9.65472e-12	9.97845e-12	1.00549e-11	1.07365e-11	1.06548e-11
4.68	1.01986e-11	9.66972e-12	9.65486e-12	9.96852e-12	1.00562e-11	1.07359e-11	1.06567e-11
4.7	1.01978e-11	9.67931e-12	9.64861e-12	9.97547e-12	1.00575e-11	1.07327e-11	1.06581e-11
4.72	1.01957e-11	9.67356e-12	9.65425e-12	9.96719e-12	1.00554e-11	1.07376e-11	1.06564e-11
4.74	1.01953e-11	9.67755e-12	9.65437e-12	9.97177e-12	1.00542e-11	1.07318e-11	1.06592e-11
4.76	1.01988e-11	9.67705e-12	9.65275e-12	9.97087e-12	1.00554e-11	1.07393e-11	1.06569e-11
4.78	1.0186e-11	9.68175e-12	9.64793e-12	9.97434e-12	1.00517e-11	1.07365e-11	1.06656e-11
4.8	1.01981e-11	9.68265e-12	9.66053e-12	9.97294e-12	1.00532e-11	1.073e-11	1.06592e-11
4.82	1.01935e-11	9.68432e-12	9.65189e-12	9.97506e-12	1.00481e-11	1.07349e-11	1.06575e-11
4.84	1.02016e-11	9.68059e-12	9.66065e-12	9.97425e-12	1.00523e-11	1.0736e-11	1.06597e-11
4.86	1.02077e-11	9.68566e-12	9.64677e-12	9.96943e-12	1.00501e-11	1.07323e-11	1.06606e-11
4.88	1.01992e-11	9.67932e-12	9.65643e-12	9.97687e-12	1.0055e-11	1.07394e-11	1.06602e-11
4.9	1.02028e-11	9.6798e-12	9.65543e-12	9.97347e-12	1.00518e-11	1.07342e-11	1.06533e-11
4.92	1.02045e-11	9.68059e-12	9.65086e-12	9.97388e-12	1.00504e-11	1.07318e-11	1.06553e-11
4.94	1.01986e-11	9.68182e-12	9.65422e-12	9.97699e-12	1.00495e-11	1.07331e-11	1.06587e-11
4.96	1.01936e-11	9.68716e-12	9.65163e-12	9.97516e-12	1.00517e-11	1.07355e-11	1.06604e-11
4.98	1.01992e-11	9.67451e-12	9.65685e-12	9.97521e-12	1.005e-11	1.07322e-11	1.06591e-11
5	1.01977e-11	9.67806e-12	9.66035e-12	9.97921e-12	1.00535e-11	1.07316e-11	1.06592e-11
5.02	1.02044e-11	9.68367e-12	9.65359e-12	9.97466e-12	1.0047e-11	1.07285e-11	1.06609e-11
5.04	1.01975e-11	9.69165e-12	9.65576e-12	9.98194e-12	1.0055e-11	1.07326e-11	1.06546e-11
5.06	1.01967e-11	9.68183e-12	9.66116e-12	9.97236e-12	1.00501e-11	1.0729e-11	1.06602e-11
5.08	1.01948e-11	9.68639e-12	9.65006e-12	9.97653e-12	1.00621e-11	1.07294e-11	1.06624e-11
5.1	1.01925e-11	9.67548e-12	9.65291e-12	9.98214e-12	1.00543e-11	1.07288e-11	1.06644e-11
5.12	1.01911e-11	9.68049e-12	9.64915e-12	9.98191e-12	1.00525e-11	1.07324e-11	1.06632e-11
5.14	1.01952e-11	9.67891e-12	9.65826e-12	9.97567e-12	1.00538e-11	1.07271e-11	1.06608e-11
5.16	1.02014e-11	9.68204e-12	9.66186e-12	9.9814e-12	1.00576e-11	1.0728e-11	1.06653e-11
5.18	1.01986e-11	9.67725e-12	9.65785e-12	9.97752e-12	1.00521e-11	1.07325e-11	1.06552e-11
5.2	1.01923e-11	9.6764e-12	9.65845e-12	9.98271e-12	1.00484e-11	1.07305e-11	1.06597e-11
5.22	1.01959e-11	9.68368e-12	9.65999e-12	9.9783e-12	1.00545e-11	1.0728e-11	1.06619e-11
5.24	1.01945e-11	9.67905e-12	9.65802e-12	9.98105e-12	1.00524e-11	1.07315e-11	1.06567e-11
5.26	1.01951e-11	9.67833e-12	9.66253e-12	9.98421e-12	1.0052e-11	1.07363e-11	1.06565e-11
5.28	1.01937e-11	9.67542e-12	9.65325e-12	9.98226e-12	1.00488e-11	1.07332e-11	1.06578e-11
5.3	1.01907e-11	9.67309e-12	9.65843e-12	9.97731e-12	1.00542e-11	1.07315e-11	1.06592e-11
5.32	1.01922e-11	9.67928e-12	9.65043e-12	9.98148e-12	1.00518e-11	1.07273e-11	1.06607e-11
5.34	1.01883e-11	9.6689e-12	9.65584e-12	9.98378e-12	1.0054e-11	1.07293e-11	1.06653e-11
5.36	1.01982e-11	9.67311e-12	9.6541e-12	9.97004e-12	1.00491e-11	1.07344e-11	1.06549e-11
5.38	1.0206e-11	9.66887e-12	9.65289e-12	9.98094e-12	1.00557e-11	1.07286e-11	1.06557e-11
5.4	1.01974e-11	9.67011e-12	9.66107e-12	9.98731e-12	1.00522e-11	1.07359e-11	1.06647e-11
5.42	1.01955e-11	9.67326e-12	9.66222e-12	9.98511e-12	1.00454e-11	1.07353e-11	1.06643e-11
5.44	1.0199e-11	9.6752e-12	9.658e-12	9.9789e-12	1.00561e-11	1.07333e-11	1.06587e-11
5.46	1.01965e-11	9.67405e-12	9.6629e-12	9.98083e-12	1.00546e-11	1.07259e-11	1.06627e-11
5.48	1.01906e-11	9.66702e-12	9.65922e-12	9.98944e-12	1.00518e-11	1.07273e-11	1.06594e-11
5.5	1.01934e-11	9.67431e-12	9.66591e-12	9.98618e-12	1.00451e-11	1.07337e-11	1.06675e-11
5.52	1.02014e-11	9.66963e-12	9.67202e-12	9.98773e-12	1.00524e-11	1.07333e-11	1.06619e-11
5.54	1.01932e-11	9.66972e-12	9.66536e-12	9.98237e-12	1.00555e-11	1.07351e-11	1.06562e-11
5.56	1.02335e-11	9.67439e-12	9.65876e-12	9.98346e-12	1.00583e-11	1.07306e-11	1.06621e-11
5.58	1.01908e-11	9.6738e-12	9.65981e-12	9.98215e-12	1.00526e-11	1.07316e-11	1.06565e-11
5.6	1.01904e-11	9.67628e-12	9.65747e-12	9.98269e-12	1.00511e-11	1.07326e-11	1.06521e-11
5.62	1.01279e-11	9.6768e-12	9.66428e-12	9.97825e-12	1.00533e-11	1.07343e-11	1.06599e-11
5.64	1.0109e-11	9.67581e-12	9.65936e-12	9.98221e-12	1.0052e-11	1.07305e-11	1.06633e-11
5.66	1.01059e-11	9.67867e-12	9.65919e-12	9.98103e-12	1.00535e-11	1.07343e-11	1.06575e-11
5.68	1.0103e-11	9.67461e-12	9.66353e-12	9.98871e-12	1.00498e-11	1.07328e-11	1.06594e-11
5.7	1.0098e-11	9.67923e-12	9.65919e-12	9.97563e-12	1.00559e-11	1.07343e-11	1.06589e-11
5.72	1.0107e-11	9.67569e-12	9.65417e-12	9.98077e-12	1.00568e-11	1.07343e-11	1.06601e-11
5.74	1.01044e-11	9.67801e-12	9.66368e-12	9.9768e-12	1.0054e-11	1.07395e-11	1.06624e-11
5.76	1.00943e-11	9.67844e-12	9.66774e-12	9.97779e-12	1.00489e-11	1.07379e-11	1.06605e-11
5.78	1.00991e-11	9.68257e-12	9.66041e-12	9.98211e-12	1.00557e-11	1.07316e-11	1.06662e-11
5.8	1.00976e-11	9.67178e-12	9.65492e-12	9.98009e-12	1.00581e-11	1.07348e-11	1.06578e-11
5.82	1.01065e-11	9.67502e-12	9.65558e-12	9.98196e-12	1.00549e-11	1.07293e-11	1.06644e-11
5.84	1.01042e-11	9.67227e-12	9.6496e-12	9.98676e-12	1.00526e-11	1.07338e-11	1.0661e-11
5.86	1.01052e-11	9.67428e-12	9.65569e-12	9.98765e-12	1.00525e-11	1.07363e-11	1.06611e-11
5.88	1.01098e-11	9.6711e-12	9.6561e-12	9.98737e-12	1.00487e-11	1.07331e-11	1.06612e-11
5.9	1.01121e-11	9.67371e-12	9.65526e-12	9.98667e-12	1.00554e-11	1.07303e-11	1.06605e-11
5.92	1.01075e-11	9.671e-12	9.66142e-12	9.98045e-12	1.00536e-11	1.07391e-11	1.06625e-11
5.94	1.01059e-11	9.67668e-12	9.65771e-12	9.9888e-12	1.00606e-11	1.07356e-11	1.06592e-11
5.96	1.01126e-11	9.67664e-12	9.66059e-12	9.98098e-12	1.0057e-11	1.07345e-11	1.06523e-11
5.98	1.01076e-11	9.67659e-12	9.65898e-12	9.98707e-12	1.00554e-11	1.07348e-11	1.06543e-11
6	1.01109e-11	9.6756e-12	9.65598e-12	1.00005e-11	1.00582e-11	1.07304e-11	1.06607e-11
6.02	1.01048e-11	9.67834e-12	9.65137e-12	9.99181e-12	1.00566e-11	1.07356e-11	1.06498e-11
6.04	1.01044e-11	9.67131e-12	9.66154e-12	9.99509e-12	1.0057e-11	1.07385e-11	1.06559e-11
6.06	1.01019e-11	9.67129e-12	9.65665e-12	9.99354e-12	1.00559e-11	1.07345e-11	1.06529e-11
6.08	1.01049e-11	9.67297e-12	9.65925e-12	9.98555e-12	1.0056e-11	1.07325e-11	1.06537e-11
6.1	1.01121e-11	9.67764e-12	9.65928e-12	9.98902e-12	1.00566e-11	1.07346e-11	1.0656e-11
6.12	1.01042e-11	9.67649e-12	9.66514e-12	9.99411e-12	1.00559e-11	1.07279e-11	1.06562e-11
6.14	1.01053e-11	9.67277e-12	9.65873e-12	9.99173e-12	1.00531e-11	1.07298e-11	1.06561e-11
6.16	1.01058e-11	9.67434e-12	9.66336e-12	9.98589e-12	1.00553e-11	1.07303e-11	1.06526e-11
6.18	1.01071e-11	9.68174e-12	9.65818e-12	9.97819e-12	1.00712e-11	1.07348e-11	1.06532e-11
6.2	1.01034e-11	9.67623e-12	9.66122e-12	9.99039e-12	1.00588e-11	1.07395e-11	1.06529e-11
6.22	1.01038e-11	9.67737e-12	9.6615e-12	9.98929e-12	1.00357e-11	1.0738e-11	1.06583e-11
6.24	1.01064e-11	9.68068e-12	9.66491e-12	9.98414e-12	1.0008e-11	1.07348e-11	1.06559e-11
6.26	1.01073e-11	9.6839e-12	9.66537e-12	9.98046e-12	9.99186e-12	1.07315e-11	1.06557e-11
6.28	1.01051e-11	9.67984e-12	9.65547e-12	9.98843e-12	9.9903e-12	1.07347e-11	1.06535e-11
6.3	1.01026e-11	9.67885e-12	9.65966e-12	9.98664e-12	9.98383e-12	1.07371e-11	1.06527e-11
6.32	1.01076e-11	9.67571e-12	9.662e-12	9.98694e-12	9.9851e-12	1.07402e-11	1.06543e-11
6.34	1.01048e-11	9.68627e-12	9.66058e-12	9.98613e-12	9.98596e-12	1.0733e-11	1.06546e-11
6.36	1.0106e-11	9.67741e-12	9.65217e-12	9.9976e-12	9.98033e-12	1.07344e-11	1.06538e-11
6.38	1.01103e-11	9.67518e-12	9.65727e-12	9.99095e-12	9.9852e-12	1.07372e-11	1.06597e-11
6.4	1.0102e-11	9.58666e-12	9.65773e-12	9.98884e-12	9.97883e-12	1.07371e-11	1.06512e-11
6.42	1.01069e-11	9.56865e-12	9.65638e-12	9.98545e-12	9.9816e-12	1.07398e-11	1.06541e-11
6.44	1.01055e-11	9.5637e-12	9.66742e-12	9.98713e-12	9.97738e-12	1.07345e-11	1.06566e-11
6.46	1.00985e-11	9.5707e-12	9.65805e-12	9.99865e-12	9.97926e-12	1.07302e-11	1.06574e-11
6.48	1.0102e-11	9.56115e-12	9.67274e-12	9.99005e-12	9.97361e-12	1.07403e-11	1.06578e-11
6.5	1.01046e-11	9.55551e-12	9.66807e-12	9.98357e-12	9.97265e-12	1.07347e-11	1.06483e-11
6.52	1.01048e-11	9.56522e-12	9.6607e-12	9.98655e-12	9.97685e-12	1.07326e-11	1.06545e-11
6.54	1.0103e-11	9.56005e-12	9.66645e-12	9.98605e-12	9.97942e-12	1.07374e-11	1.06547e-11
6.56	1.01023e-11	9.56619e-12	9.66223e-12	9.98912e-12	9.9779e-12	1.07321e-11	1.06557e-11
6.58	1.00964e-11	9.57156e-12	9.66779e-12	9.98641e-12	9.97586e-12	1.07342e-11	1.06499e-11
6.6	1.01065e-11	9.57014e-12	9.65511e-12	9.98685e-12	9.97727e-12	1.07328e-11	1.06586e-11
6.62	1.01034e-11	9.57752e-12	9.65605e-12	9.99283e-12	9.96984e-12	1.07344e-11	1.0653e-11
6.64	1.00984e-11	9.57746e-12	9.66331e-12	9.99477e-12	9.97651e-12	1.07341e-11	1.06557e-11
6.66	1.0107e-11	9.57088e-12	9.657e-12	9.99597e-12	9.97481e-12	1.0736e-11	1.06564e-11
6.68	1.01076e-11	9.5758e-12	9.66019e-12	9.98756e-12	9.96731e-12	1.07407e-11	1.06569e-11
6.7	1.01057e-11	9.57002e-12	9.66417e-12	9.98905e-12	9.9719e-12	1.0734e-11	1.0657e-11
6.72	1.01021e-11	9.5722e-12	9.65834e-12	9.99546e-12	9.98131e-12	1.07335e-11	1.06566e-11
6.74	1.01052e-11	9.57449e-12	9.66966e-12	9.99449e-12	9.97331e-12	1.07397e-11	1.06606e-11
6.76	1.011e-11	9.57894e-12	9.66181e-12	9.99093e-12	9.97971e-12	1.07358e-11	1.06572e-11
6.78	1.01086e-11	9.56336e-12	9.66016e-12	9.98542e-12	9.97672e-12	1.07366e-11	1.06525e-11
6.8	1.0106e-11	9.56628e-12	9.66345e-12	9.98341e-12	9.97771e-12	1.07418e-11	1.06591e-11
6.82	1.01003e-11	9.57013e-12	9.65957e-12	9.9901e-12	9.97586e-12	1.07321e-11	1.0656e-11
6.84	1.01007e-11	9.57215e-12	9.66482e-12	9.99054e-12	9.96944e-12	1.07432e-11	1.06584e-11
6.86	1.01067e-11	9.58254e-12	9.6669e-12	9.98227e-12	9.97568e-12	1.07377e-11	1.06579e-11
6.88	1.01047e-11	9.57607e-12	9.65908e-12	9.99412e-12	9.97935e-12	1.07391e-11	1.06531e-11
6.9	1.01098e-11	9.57643e-12	9.6598e-12	9.99117e-12	9.97428e-12	1.07382e-11	1.06445e-11
6.92	1.01061e-11	9.57858e-12	9.65679e-12	9.99747e-12	9.9762e-12	1.07431e-11	1.06586e-11
6.94	1.01105e-11	9.57947e-12	9.65427e-12	9.98832e-12	9.97535e-12	1.07404e-11	1.06593e-11
6.96	1.01182e-11	9.583e-12	9.66185e-12	9.99245e-12	9.97956e-12	1.07413e-11	1.06479e-11
6.98	1.01015e-11	9.58456e-12	9.66224e-12	9.98981e-12	9.97078e-12	1.07318e-11	1.06477e-11
7	1.01077e-11	9.5735e-12	9.66241e-12	9.99079e-12	9.97414e-12	1.07315e-11	1.06387e-11
7.02	1.01046e-11	9.58342e-12	9.64753e-12	9.98852e-12	9.97305e-12	1.07248e-11	1.06366e-11
7.04	1.01066e-11	9.57622e-12	9.63922e-12	9.98949e-12	9.97289e-12	1.07149e-11	1.06415e-11
7.06	1.0112e-11	9.57524e-12	9.61779e-12	9.99883e-12	9.97538e-12	1.07066e-11	1.06359e-11
7.08	1.01094e-11	9.574e-12	9.60503e-12	9.99614e-12	9.96357e-12	1.06933e-11	1.06345e-11
7.1	1.0109e-11	9.57466e-12	9.59371e-12	9.98727e-12	9.97286e-12	1.06936e-11	1.06333e-11
7.12	1.01034e-11	9.57923e-12	9.57055e-12	9.99585e-12	9.98422e-12	1.06947e-11	1.063e-11
7.14	1.01108e-11	9.57614e-12	9.55375e-12	9.99812e-12	9.97951e-12	1.0686e-11	1.0634e-11
7.16	1.01126e-11	9.5754e-12	9.55001e-12	9.99091e-12	9.9756e-12	1.06899e-11	1.06336e-11
7.18	1.01109e-11	9.58212e-12	9.54778e-12	9.98972e-12	9.97427e-12	1.06921e-11	1.0632e-11
7.2	1.01122e-11	9.57812e-12	9.54271e-12	9.99486e-12	9.97834e-12	1.06871e-11	1.06265e-11
7.22	1.01085e-11	9.57557e-12	9.54117e-12	9.98938e-12	9.97458e-12	1.06857e-11	1.06254e-11
7.24	1.01089e-11	9.57275e-12	9.54344e-12	9.99033e-12	9.97239e-12	1.06883e-11	1.06269e-11
7.26	1.01166e-11	9.57941e-12	9.54144e-12	9.99286e-12	9.97308e-12	1.06893e-11	1.0631e-11
7.28	1.01138e-11	9.58203e-12	9.53684e-12	9.9968e-12	9.97719e-12	1.06947e-11	1.06365e-11
7.3	1.01104e-11	9.57733e-12	9.54508e-12	9.99736e-12	9.97576e-12	1.0687e-11	1.06311e-11
7.32	1.01096e-11	9.58083e-12	9.53924e-12	9.99171e-12	9.97507e-12	1.06837e-11	1.06314e-11
7.34	1.01182e-11	9.58534e-12	9.5484e-12	9.99313e-12	9.97209e-12	1.06878e-11	1.0633e-11
7.36	1.01129e-11	9.58023e-12	9.54109e-12	9.98588e-12	9.97486e-12	1.06921e-11	1.06328e-11
7.38	1.01177e-11	9.58099e-12	9.53971e-12	9.99781e-12	9.97717e-12	1.06956e-11	1.06318e-11
7.4	1.01116e-11	9.58385e-12	9.54164e-12	9.98814e-12	9.97571e-12	1.06891e-11	1.0635e-11
7.42	1.01138e-11	9.58486e-12	9.54034e-12	9.99217e-12	9.96982e-12	1.06916e-11	1.06334e-11
7.44	1.01089e-11	9.58429e-12	9.54322e-12	9.99292e-12	9.9851e-12	1.06942e-11	1.06337e-11
7.46	1.01114e-11	9.587e-12	9.54717e-12	9.99592e-12	9.97533e-12	1.06866e-11	1.06311e-11
7.48	1.01148e-11	9.57736e-12	9.54132e-12	9.99309e-12	9.97373e-12	1.06857e-11	1.06334e-11
7.5	1.01197e-11	9.58154e-12	9.54388e-12	9.99547e-12	9.97723e-12	1.06954e-11	1.06257e-11
7.52	1.01167e-11	9.57415e-12	9.53944e-12	9.99536e-12	9.97895e-12	1.06882e-11	1.06359e-11
7.54	1.01157e-11	9.58464e-12	9.54811e-12	9.99957e-12	9.97026e-12	1.06869e-11	1.06341e-11
7.56	1.01111e-11	9.58107e-12	9.54378e-12	9.98815e-12	9.98006e-12	1.06909e-11	1.06323e-11
7.58	1.01147e-11	9.58456e-12	9.54701e-12	9.99342e-12	9.98121e-12	1.06837e-11	1.0634e-11
7.6	1.01179e-11	9.58567e-12	9.54405e-12	1.00003e-11	9.97378e-12	1.06853e-11	1.06313e-11
7.62	1.01135e-11	9.57955e-12	9.54291e-12	9.99148e-12	9.97783e-12	1.0685e-11	1.06308e-11
7.64	1.01119e-11	9.58285e-12	9.5481e-12	9.99451e-12	9.97916e-12	1.06878e-11	1.06325e-11
7.66	1.01171e-11	9.58602e-12	9.54998e-12	9.99467e-12	9.97446e-12	1.06889e-11	1.06293e-11
7.68	1.01155e-11	9.57728e-12	9.54689e-12	1.00015e-11	9.97506e-12	1.0686e-11	1.06262e-11
7.7	1.01097e-11	9.58712e-12	9.54357e-12	9.99789e-12	9.97326e-12	1.06852e-11	1.06293e-11
7.72	1.01175e-11	9.58428e-12	9.54759e-12	9.99453e-12	9.97802e-12	1.06843e-11	1.06328e-11
7.74	1.01195e-11	9.58239e-12	9.54195e-12	9.99923e-12	9.97712e-12	1.0678e-11	1.06303e-11
7.76	1.01143e-11	9.58217e-12	9.54474e-12	1.00008e-11	9.97419e-12	1.06825e-11	1.06346e-11
7.78	1.01143e-11	9.58004e-12	9.54235e-12	9.99402e-12	9.97633e-12	1.06848e-11	1.06316e-11
7.8	1.0117e-11	9.58401e-12	9.54063e-12	9.99383e-12	9.98083e-12	1.06887e-11	1.06285e-11
7.82	1.01161e-11	9.57803e-12	9.544e-12	9.99774e-12	9.97035e-12	1.06866e-11	1.06297e-11
7.84	1.01184e-11	9.58303e-12	9.54522e-12	9.99417e-12	9.97719e-12	1.06838e-11	1.0634e-11
7.86	1.01136e-11	9.5905e-12	9.54457e-12	9.99955e-12	9.97879e-12	1.06844e-11	1.06358e-11
7.88	1.01137e-11	9.59432e-12	9.54043e-12	9.99743e-12	9.97524e-12	1.06805e-11	1.06349e-11
7.9	1.01127e-11	9.58973e-12	9.53672e-12	1.00008e-11	9.97259e-12	1.06813e-11	1.06378e-11
7.92	1.01143e-11	9.58159e-12	9.54126e-12	9.99767e-12	9.97343e-12	1.06844e-11	1.06288e-11
7.94	1.0114e-11	9.58934e-12	9.54505e-12	9.9949e-12	9.97589e-12	1.06798e-11	1.06299e-11
7.96	1.01161e-11	9.58222e-12	9.53974e-12	9.99447e-12	9.98211e-12	1.068e-11	1.06313e-11
7.98	1.01161e-11	9.58319e-12	9.54306e-12	9.99231e-12	9.97559e-12	1.0679e-11	1.06381e-11
8	1.01142e-11	9.58623e-12	9.54341e-12	9.99723e-12	9.97405e-12	1.06823e-11	1.06294e-11
8.02	1.0113e-11	9.5851e-12	9.54078e-12	9.99424e-12	9.97836e-12	1.06808e-11	1.06196e-11
8.04	1.01179e-11	9.58736e-12	9.54547e-12	9.99757e-12	9.97266e-12	1.06795e-11	1.06267e-11
8.06	1.01131e-11	9.58809e-12	9.54697e-12	9.9916e-12	9.96816e-12	1.06839e-11	1.06295e-11
8.08	1.01096e-11	9.5876e-12	9.54227e-12	9.99658e-12	9.97835e-12	1.06779e-11	1.06263e-11
8.1	1.01099e-11	9.57989e-12	9.54451e-12	1.00007e-11	9.97994e-12	1.06842e-11	1.06277e-11
8.12	1.01096e-11	9.58761e-12	9.54486e-12	1.00034e-11	9.97419e-12	1.06795e-11	1.06275e-11
8.14	1.01054e-11	9.5841e-12	9.54652e-12	9.99893e-12	9.97668e-12	1.06835e-11	1.06316e-11
8.16	1.00968e-11	9.58382e-12	9.55185e-12	9.99759e-12	9.97951e-12	1.06862e-11	1.06315e-11
8.18	1.01106e-11	9.58489e-12	9.54569e-12	9.99006e-12	9.97381e-12	1.06885e-11	1.06303e-11
8.2	1.01056e-11	9.58361e-12	9.54796e-12	9.99434e-12	9.97186e-12	1.06907e-11	1.06316e-11
8.22	1.01026e-11	9.57825e-12	9.54467e-12	9.99663e-12	9.97549e-12	1.06846e-11	1.06343e-11
8.24	1.01131e-11	9.58517e-12	9.54565e-12	1.00018e-11	9.97751e-12	1.0679e-11	1.06328e-11
8.26	1.01089e-11	9.58521e-12	9.54396e-12	9.99588e-12	9.97046e-12	1.06826e-11	1.06282e-11
8.28	1.01082e-11	9.58206e-12	9.54216e-12	9.99268e-12	9.97186e-12	1.06811e-11	1.06352e-11
8.3	1.0113e-11	9.58511e-12	9.54377e-12	9.99141e-12	9.97924e-12	1.06828e-11	1.06332e-11
8.32	1.01031e-11	9.58334e-12	9.55512e-12	9.99485e-12	9.97648e-12	1.06817e-11	1.06286e-11
8.34	1.01096e-11	9.58281e-12	9.55029e-12	9.99527e-12	9.97194e-12	1.06791e-11	1.06367e-11
8.36	1.01096e-11	9.58431e-12	9.54761e-12	9.9921e-12	9.97226e-12	1.06817e-11	1.06297e-11
8.38	1.01061e-11	9.57771e-12	9.55522e-12	9.9933e-12	9.98026e-12	1.068e-11	1.06309e-11
8.4	1.01083e-11	9.58804e-12	9.54682e-12	9.99899e-12	9.97679e-12	1.06808e-11	1.06345e-11
8.42	1.01003e-11	9.58219e-12	9.54783e-12	9.99708e-12	9.98272e-12	1.0678e-11	1.06279e-11
8.44	1.01117e-11	9.58694e-12	9.54687e-12	9.99929e-12	9.98048e-12	1.06875e-11	1.06317e-11
8.46	1.01042e-11	9.58482e-12	9.54909e-12	9.9948e-12	9.97311e-12	1.06845e-11	1.06328e-11
8.48	1.01009e-11	9.5865e-12	9.54578e-12	1.00001e-11	9.98113e-12	1.06855e-11	1.06274e-11
8.5	1.01128e-11	9.58698e-12	9.54131e-12	9.99583e-12	9.97373e-12	1.0685e-11	1.06334e-11
8.52	1.01143e-11	9.58549e-12	9.54366e-12	9.99849e-12	9.97781e-12	1.06821e-11	1.06239e-11
8.54	1.0113e-11	9.58151e-12	9.54486e-12	9.99701e-12	9.97865e-12	1.06791e-11	1.06306e-11
8.56	1.01102e-11	9.5838e-12	9.54862e-12	9.99705e-12	9.97079e-12	1.06792e-11	1.06305e-11
8.58	1.01119e-11	9.58663e-12	9.54702e-12	9.99939e-12	9.97369e-12	1.06838e-11	1.06347e-11
8.6	1.01127e-11	9.58506e-12	9.54333e-12	1.00008e-11	9.97097e-12	1.06799e-11	1.06308e-11
8.62	1.01143e-11	9.58392e-12	9.55031e-12	9.99862e-12	9.98012e-12	1.06825e-11	1.06313e-11
8.64	1.01136e-11	9.5801e-12	9.55141e-12	9.99912e-12	9.97622e-12	1.06821e-11	1.06355e-11
8.66	1.01115e-11	9.58133e-12	9.54745e-12	1.00014e-11	9.97367e-12	1.06811e-11	1.06298e-11
8.68	1.01179e-11	9.58274e-12	9.54497e-12	9.99865e-12	9.98242e-12	1.06841e-11	1.06315e-11
8.7	1.01086e-11	9.5749e-12	9.53718e-12	1.00042e-11	9.97686e-12	1.0683e-11	1.06303e-11
8.72	1.01166e-11	9.57761e-12	9.54945e-12	1.0005e-11	9.982e-12	1.06841e-11	1.06326e-11
8.74	1.01129e-11	9.57894e-12	9.55573e-12	9.9976e-12	9.97929e-12	1.06747e-11	1.06321e-11
8.76	1.01104e-11	9.58704e-12	9.54961e-12	9.99866e-12	9.98271e-12	1.06825e-11	1.06298e-11
8.78	1.01138e-11	9.5846e-12	9.54796e-12	9.99885e-12	9.97214e-12	1.06794e-11	1.06339e-11
8.8	1.01138e-11	9.58468e-12	9.5475e-12	1.00002e-11	9.98103e-12	1.06827e-11	1.06268e-11
8.82	1.0119e-11	9.57997e-12	9.5445e-12	9.99717e-12	9.97871e-12	1.06811e-11	1.06237e-11
8.84	1.01144e-11	9.57395e-12	9.54916e-12	1.00005e-11	9.97711e-12	1.06829e-11	1.06282e-11
8.86	1.01094e-11	9.57961e-12	9.54298e-12	1.00007e-11	9.97326e-12	1.06852e-11	1.06213e-11
8.88	1.01147e-11	9.57726e-12	9.5495e-12	1.00072e-11	9.98432e-12	1.06762e-11	1.06222e-11
8.9	1.01136e-11	9.57716e-12	9.55313e-12	9.99698e-12	9.97564e-12	1.06811e-11	1.06265e-11
8.92	1.01084e-11	9.5867e-12	9.55524e-12	9.999e-12	9.97766e-12	1.06787e-11	1.06249e-11
8.94	1.01164e-11	9.5778e-12	9.55368e-12	9.99747e-12	9.97492e-12	1.06808e-11	1.06269e-11
8.96	1.01181e-11	9.58438e-12	9.54833e-12	9.99924e-12	9.9799e-12	1.06795e-11	1.06295e-11
8.98	1.0114e-11	9.58377e-12	9.55274e-12	9.99773e-12	9.97755e-12	1.06755e-11	1.06287e-11
9	1.0118e-11	9.57997e-12	9.55553e-12	9.99253e-12	9.97753e-12	1.06806e-11	1.06283e-11
9.02	1.01123e-11	9.57978e-12	9.55356e-12	1.00013e-11	9.98148e-12	1.06728e-11	1.06314e-11
9.04	1.0114e-11	9.58102e-12	9.55345e-12	9.99954e-12	9.97731e-12	1.06771e-11	1.06282e-11
9.06	1.01198e-11	9.58407e-12	9.55554e-12	9.99755e-12	9.97866e-12	1.06754e-11	1.06271e-11
9.08	1.0114e-11	9.58436e-12	9.55092e-12	9.99585e-12	9.98335e-12	1.06787e-11	1.06249e-11
9.1	1.01138e-11	9.57685e-12	9.55484e-12	1.00008e-11	9.97891e-12	1.06748e-11	1.06329e-11
9.12	1.0114e-11	9.5841e-12	9.55493e-12	9.99338e-12	9.98217e-12	1.06718e-11	1.06297e-11
9.14	1.01117e-11	9.58791e-12	9.54764e-12	1.00007e-11	9.98401e-12	1.06697e-11	1.06307e-11
9.16	1.01108e-11	9.58198e-12	9.55288e-12	9.99011e-12	9.98655e-12	1.06711e-11	1.06284e-11
9.18	1.01101e-11	9.57542e-12	9.55082e-12	9.99402e-12	9.98222e-12	1.06767e-11	1.0632e-11
9.2	1.01184e-11	9.57943e-12	9.54923e-12	9.98983e-12	9.98213e-12	1.06729e-11	1.06291e-11
9.22	1.01136e-11	9.58296e-12	9.54223e-12	9.99095e-12	9.98344e-12	1.06775e-11	1.0632e-11
9.24	1.01147e-11	9.58416e-12	9.54852e-12	9.99474e-12	9.98056e-12	1.06719e-11	1.06332e-11
9.26	1.01147e-11	9.58729e-12	9.55688e-12	9.99328e-12	9.97771e-12	1.06707e-11	1.06307e-11
9.28	1.01162e-11	9.58815e-12	9.55803e-12	9.99201e-12	9.98043e-12	1.06739e-11	1.06303e-11
9.3	1.01164e-11	9.58579e-12	9.554e-12	9.99544e-12	9.9807e-12	1.06716e-11	1.06346e-11
9.32	1.01202e-11	9.58524e-12	9.55763e-12	9.99841e-12	9.98448e-12	1.06771e-11	1.06356e-11
9.34	1.01127e-11	9.59344e-12	9.54931e-12	9.99061e-12	9.9729e-12	1.06696e-11	1.06319e-11
9.36	1.01198e-11	9.58893e-12	9.55015e-12	9.98999e-12	9.98421e-12	1.06736e-11	1.06295e-11
9.38	1.01191e-11	9.58558e-12	9.55489e-12	9.99097e-12	9.97764e-12	1.06724e-11	1.06301e-11
9.4	1.01184e-11	9.59032e-12	9.56128e-12	9.99763e-12	9.97812e-12	1.06768e-11	1.06308e-11
9.42	1.01141e-11	9.58621e-12	9.5546e-12	9.99316e-12	9.98369e-12	1.06719e-11	1.06339e-11
9.44	1.01141e-11	9.59674e-12	9.55681e-12	9.99198e-12	9.98673e-12	1.06722e-11	1.06317e-11
9.46	1.01228e-11	9.58429e-12	9.5478e-12	9.99452e-12	9.98245e-12	1.06694e-11	1.06289e-11
9.48	1.01143e-11	9.58594e-12	9.5494e-12	9.98962e-12	9.97533e-12	1.06718e-11	1.06284e-11
9.5	1.01173e-11	9.59323e-12	9.5574e-12	9.99377e-12	9.98514e-12	1.06737e-11	1.06305e-11
9.52	1.01159e-11	9.58262e-12	9.55775e-12	9.98934e-12	9.9786e-12	1.06714e-11	1.06339e-11
9.54	1.01192e-11	9.58225e-12	9.55843e-12	9.99451e-12	9.97235e-12	1.06762e-11	1.06274e-11
9.56	1.01136e-11	9.58529e-12	9.55288e-12	1.00029e-11	9.98454e-12	1.06752e-11	1.06319e-11
9.58	1.01158e-11	9.59329e-12	9.5527e-12	9.99558e-12	9.98e-12	1.0674e-11	1.06225e-11
9.6	1.0112e-11	9.58038e-12	9.56379e-12	9.99703e-12	9.98143e-12	1.06849e-11	1.0628e-11
9.62	1.0114e-11	9.59383e-12	9.55447e-12	1.00005e-11	9.9809e-12	1.06707e-11	1.06279e-11
9.64	1.01212e-11	9.59316e-12	9.55769e-12	1.00012e-11	9.97634e-12	1.06756e-11	1.06234e-11
9.66	1.01148e-11	9.58421e-12	9.5514e-12	9.9962e-12	9.97848e-12	1.06753e-11	1.06308e-11
9.68	1.01194e-11	9.59236e-12	9.56037e-12	9.9995e-12	9.98412e-12	1.06738e-11	1.06253e-11
9.7	1.01224e-11	9.59081e-12	9.55705e-12	9.99487e-12	9.97904e-12	1.0677e-11	1.06237e-11
9.72	1.01207e-11	9.59353e-12	9.56168e-12	9.9968e-12	9.97922e-12	1.06757e-11	1.0624e-11
9.74	1.01143e-11	9.59135e-12	9.5584e-12	9.9952e-12	9.98043e-12	1.06721e-11	1.06232e-11
9.76	1.01204e-11	9.58596e-12	9.55835e-12	1.00014e-11	9.98217e-12	1.0671e-11	1.06268e-11
9.78	1.01178e-11	9.58641e-12	9.56337e-12	9.99937e-12	9.98229e-12	1.06751e-11	1.06305e-11
9.8	1.01208e-11	9.58847e-12	9.55976e-12	9.99313e-12	9.97725e-12	1.06728e-11	1.06187e-11
9.82	1.01231e-11	9.59164e-12	9.5595e-12	9.99702e-12	9.97828e-12	1.06722e-11	1.06165e-11
9.84	1.01139e-11	9.59081e-12	9.55996e-12	9.99634e-12	9.97857e-12	1.06777e-11	1.06255e-11
9.86	1.01166e-11	9.58319e-12	9.5624e-12	9.99735e-12	9.97997e-12	1.06762e-11	1.06258e-11
9.88	1.01161e-11	9.58746e-12	9.56104e-12	9.9894e-12	9.98345e-12	1.06769e-11	1.06273e-11
9.9	1.0123e-11	9.58925e-12	9.56397e-12	9.99798e-12	9.98055e-12	1.06815e-11	1.06306e-11
9.92	1.01233e-11	9.58927e-12	9.56107e-12	9.99526e-12	9.98045e-12	1.06754e-11	1.06241e-11
9.94	1.01205e-11	9.58918e-12	9.55194e-12	1.00012e-11	9.98299e-12	1.0674e-11	1.06271e-11
9.96	1.01195e-11	9.58951e-12	9.55842e-12	1.00006e-11	9.98107e-12	1.06691e-11	1.06298e-11
9.98	1.0121e-11	9.58864e-12	9.55886e-12	9.9957e-12	9.97893e-12	1.06731e-11	1.06225e-11
10	1.01245e-11	9.58569e-12	9.55514e-12	9.98945e-12	9.97248e-12	1.06821e-11	1.06204e-11
10.02	1.01163e-11	9.59008e-12	9.56332e-12	9.99616e-12	9.97787e-12	1.06755e-11	1.0625e-11
10.04	1.01133e-11	9.59638e-12	9.5586e-12	9.99819e-12	9.98046e-12	1.06754e-11	1.06257e-11
10.06	1.01256e-11	9.58546e-12	9.55545e-12	1.00028e-11	9.97856e-12	1.06808e-11	1.06214e-11
10.08	1.01189e-11	9.59017e-12	9.55802e-12	1.00001e-11	9.9837e-12	1.06775e-11	1.06219e-11
10.1	1.01172e-11	9.58448e-12	9.56143e-12	9.99728e-12	9.98363e-12	1.06821e-11	1.06257e-11
10.12	1.01147e-11	9.58012e-12	9.55643e-12	1.00005e-11	9.98152e-12	1.06807e-11	1.06248e-11
10.14	1.01272e-11	9.59223e-12	9.56013e-12	1.00008e-11	9.98769e-12	1.0678e-11	1.06182e-11
10.16	1.01259e-11	9.58385e-12	9.55673e-12	9.99857e-12	9.98618e-12	1.06756e-11	1.0626e-11
10.18	1.01142e-11	9.58758e-12	9.55898e-12	9.99155e-12	9.97853e-12	1.06791e-11	1.06213e-11
10.2	1.01218e-11	9.58435e-12	9.55675e-12	9.9909e-12	9.98295e-12	1.06777e-11	1.06301e-11
10.22	1.01254e-11	9.59161e-12	9.54795e-12	9.99387e-12	9.98407e-12	1.06762e-11	1.06245e-11
10.24	1.01203e-11	9.58728e-12	9.54449e-12	9.99638e-12	9.98227e-12	1.06791e-11	1.06247e-11
10.26	1.0125e-11	9.58879e-12	9.55086e-12	1.00035e-11	9.97995e-12	1.06789e-11	1.0624e-11
10.28	1.01199e-11	9.58605e-12	9.54367e-12	9.99845e-12	9.98165e-12	1.06742e-11	1.06164e-11
10.3	1.01209e-11	9.59544e-12	9.55227e-12	9.99764e-12	9.98164e-12	1.06732e-11	1.06205e-11
10.32	1.0122e-11	9.58939e-12	9.54725e-12	9.99507e-12	9.97868e-12	1.06785e-11	1.06255e-11
10.34	1.01242e-11	9.59718e-12	9.55648e-12	9.99633e-12	9.98687e-12	1.06767e-11	1.06195e-11
10.36	1.01232e-11	9.59139e-12	9.55452e-12	9.99939e-12	9.97911e-12	1.06778e-11	1.06235e-11
10.38	1.01135e-11	9.59164e-12	9.55093e-12	9.99912e-12	9.97962e-12	1.06786e-11	1.06197e-11
10.4	1.01182e-11	9.58872e-12	9.54777e-12	1.00032e-11	9.98742e-12	1.06821e-11	1.06161e-11
10.42	1.01238e-11	9.59351e-12	9.5544e-12	9.99808e-12	9.98448e-12	1.06794e-11	1.06182e-11
10.44	1.0124e-11	9.59197e-12	9.55823e-12	1.00002e-11	9.98347e-12	1.06761e-11	1.06184e-11
10.46	1.01198e-11	9.59306e-12	9.55463e-12	1.00063e-11	9.98117e-12	1.06837e-11	1.06247e-11
10.48	1.01215e-11	9.59285e-12	9.55556e-12	1.00035e-11	9.98146e-12	1.06763e-11	1.06199e-11
10.5	1.01239e-11	9.58992e-12	9.55143e-12	9.99832e-12	9.98402e-12	1.06795e-11	1.06205e-11
10.52	1.0126e-11	9.58958e-12	9.54996e-12	9.99849e-12	9.98053e-12	1.06803e-11	1.06265e-11
10.54	1.01205e-11	9.59259e-12	9.55015e-12	9.99084e-12	9.98598e-12	1.06796e-11	1.06258e-11
10.56	1.01234e-11	9.59298e-12	9.55259e-12	1.00047e-11	9.98163e-12	1.06784e-11	1.06164e-11
10.58	1.01239e-11	9.5962e-12	9.55989e-12	1.00025e-11	9.98072e-12	1.06813e-11	1.06246e-11
10.6	1.01229e-11	9.59693e-12	9.55157e-12	1.00015e-11	9.97875e-12	1.0684e-11	1.06207e-11
10.62	1.0124e-11	9.59164e-12	9.55234e-12	1.00014e-11	9.98063e-12	1.06813e-11	1.06214e-11
10.64	1.01243e-11	9.59459e-12	9.55219e-12	1.00074e-11	9.98064e-12	1.06794e-11	1.06245e-11
10.66	1.01225e-11	9.59513e-12	9.56061e-12	1.00002e-11	9.97175e-12	1.06807e-11	1.06208e-11
10.68	1.01214e-11	9.5899e-12	9.55958e-12	1.00072e-11	9.97806e-12	1.06777e-11	1.06206e-11
10.7	1.01217e-11	9.59073e-12	9.55634e-12	1.00043e-11	9.98442e-12	1.06794e-11	1.0622e-11
10.72	1.01254e-11	9.59204e-12	9.55837e-12	1.00026e-11	9.98066e-12	1.06783e-11	1.06202e-11
10.74	1.01238e-11	9.58724e-12	9.55823e-12	1.0003e-11	9.98178e-12	1.06796e-11	1.06211e-11
10.76	1.01244e-11	9.58978e-12	9.55678e-12	1.00081e-11	9.97861e-12	1.06818e-11	1.06235e-11
10.78	1.01258e-11	9.59502e-12	9.55711e-12	1.00007e-11	9.98331e-12	1.06718e-11	1.06227e-11
10.8	1.01286e-11	9.59369e-12	9.55554e-12	1.00048e-11	9.97452e-12	1.06797e-11	1.06243e-11
10.82	1.01255e-11	9.59531e-12	9.55375e-12	1.00106e-11	9.97308e-12	1.06801e-11	1.06261e-11
10.84	1.01261e-11	9.60238e-12	9.55174e-12	9.99486e-12	9.98093e-12	1.06803e-11	1.06205e-11
10.86	1.01249e-11	9.59324e-12	9.55945e-12	1.00002e-11	9.98236e-12	1.06747e-11	1.06268e-11
10.88	1.01227e-11	9.59511e-12	9.55553e-12	9.99647e-12	9.98175e-12	1.0678e-11	1.06241e-11
10.9	1.01274e-11	9.59345e-12	9.55817e-12	1.00043e-11	9.97759e-12	1.06838e-11	1.06227e-11
10.92	1.01207e-11	9.58611e-12	9.56408e-12	1.00026e-11	9.98815e-12	1.06775e-11	1.06209e-11
10.94	1.01249e-11	9.59167e-12	9.55424e-12	1.00079e-11	9.97839e-12	1.06777e-11	1.06217e-11
10.96	1.0122e-11	9.59571e-12	9.55643e-12	9.99885e-12	9.97828e-12	1.06833e-11	1.06233e-11
10.98	1.01263e-11	9.59101e-12	9.55075e-12	1.00033e-11	9.97982e-12	1.06768e-11	1.06254e-11
11	1.01324e-11	9.59447e-12	9.55535e-12	9.99539e-12	9.97426e-12	1.06789e-11	1.0622e-11
11.02	1.01237e-11	9.5953e-12	9.56044e-12	1.00051e-11	9.97798e-12	1.06785e-11	1.06227e-11
11.04	1.01372e-11	9.60055e-12	9.56285e-12	9.99893e-12	9.98143e-12	1.06781e-11	1.06293e-11
11.06	1.01216e-11	9.58914e-12	9.56279e-12	1.00011e-11	9.98213e-12	1.06794e-11	1.06196e-11
11.08	1.01252e-11	9.59619e-12	9.55949e-12	9.99663e-12	9.97892e-12	1.06789e-11	1.06208e-11
11.1	1.01239e-11	9.58993e-12	9.55726e-12	1.00077e-11	9.97642e-12	1.06839e-11	1.0621e-11
11.12	1.0125e-11	9.59699e-12	9.56269e-12	1.00029e-11	9.98214e-12	1.06761e-11	1.06277e-11
11.14	1.01235e-11	9.59803e-12	9.55367e-12	1.00045e-11	9.97655e-12	1.06785e-11	1.06273e-11
11.16	1.01266e-11	9.59759e-12	9.55855e-12	9.99661e-12	9.97782e-12	1.06841e-11	1.0628e-11
11.18	1.013e-11	9.59178e-12	9.5546e-12	1.00029e-11	9.9713e-12	1.06753e-11	1.06266e-11
11.2	1.01273e-11	9.59395e-12	9.56378e-12	1.00034e-11	9.97418e-12	1.0679e-11	1.0621e-11
11.22	1.01212e-11	9.59955e-12	9.56259e-12	1.00077e-11	9.97609e-12	1.06832e-11	1.06287e-11
11.24	1.01294e-11	9.59723e-12	9.56361e-12	1.00052e-11	9.97044e-12	1.06818e-11	1.06288e-11
11.26	1.01298e-11	9.59297e-12	9.56468e-12	1.00048e-11	9.97524e-12	1.06785e-11	1.06311e-11
11.28	1.01282e-11	9.6006e-12	9.55853e-12	1.00039e-11	9.96747e-12	1.06808e-11	1.06286e-11
11.3	1.0127e-11	9.59509e-12	9.56579e-12	1.0009e-11	9.97592e-12	1.06798e-11	1.06259e-11
11.32	1.01253e-11	9.5938e-12	9.56661e-12	1.0002e-11	9.97055e-12	1.06805e-11	1.06191e-11
11.34	1.01279e-11	9.59741e-12	9.56223e-12	1.00098e-11	9.97486e-12	1.06839e-11	1.06256e-11
11.36	1.01267e-11	9.59374e-12	9.55622e-12	1.00048e-11	9.96871e-12	1.06809e-11	1.06337e-11
11.38	1.01204e-11	9.59503e-12	9.55877e-12	1.00075e-11	9.97425e-12	1.06849e-11	1.06237e-11
11.4	1.01305e-11	9.60337e-12	9.56134e-12	1.0005e-11	9.98049e-12	1.0679e-11	1.06275e-11
11.42	1.01237e-11	9.59311e-12	9.55546e-12	1.00067e-11	9.97394e-12	1.06756e-11	1.06283e-11
11.44	1.01248e-11	9.59409e-12	9.5637e-12	1.00037e-11	9.96868e-12	1.06816e-11	1.06257e-11
11.46	1.01226e-11	9.59786e-12	9.55628e-12	1.00109e-11	9.97302e-12	1.06752e-11	1.06315e-11
11.48	1.01266e-11	9.58455e-12	9.55947e-12	1.00075e-11	9.96966e-12	1.06827e-11	1.06265e-11
11.5	1.01194e-11	9.59559e-12	9.55798e-12	1.00036e-11	9.97332e-12	1.06793e-11	1.06252e-11
11.52	1.01229e-11	9.59581e-12	9.56107e-12	1.00064e-11	9.97469e-12	1.06769e-11	1.06237e-11
11.54	1.01289e-11	9.59511e-12	9.55739e-12	1.00055e-11	9.97639e-12	1.06758e-11	1.06302e-11
11.56	1.01245e-11	9.596e-12	9.55449e-12	1.00095e-11	9.97884e-12	1.06836e-11	1.06235e-11
11.58	1.01272e-11	9.60105e-12	9.55294e-12	1.00062e-11	9.97181e-12	1.06806e-11	1.0629e-11
11.6	1.01211e-11	9.59883e-12	9.56375e-12	1.00055e-11	9.97607e-12	1.06768e-11	1.06247e-11
11.62	1.01325e-11	9.58988e-12	9.56292e-12	1.00052e-11	9.97255e-12	1.06854e-11	1.06208e-11
11.64	1.01313e-11	9.59567e-12	9.55865e-12	1.0013e-11	9.97392e-12	1.06819e-11	1.06306e-11
11.66	1.0131e-11	9.59071e-12	9.55976e-12	1.00044e-11	9.97265e-12	1.06865e-11	1.06283e-11
11.68	1.01261e-11	9.59413e-12	9.56422e-12	1.00042e-11	9.98286e-12	1.06905e-11	1.06237e-11
11.7	1.01315e-11	9.59771e-12	9.56297e-12	1.00033e-11	9.97698e-12	1.06815e-11	1.06262e-11
11.72	1.01304e-11	9.59706e-12	9.56416e-12	1.00005e-11	9.97637e-12	1.06824e-11	1.06233e-11
11.74	1.01334e-11	9.59523e-12	9.56352e-12	1.00118e-11	9.96811e-12	1.06816e-11	1.06284e-11
11.76	1.01294e-11	9.59092e-12	9.56537e-12	1.0012e-11	9.97775e-12	1.06787e-11	1.06299e-11
11.78	1.01293e-11	9.58961e-12	9.56531e-12	1.00118e-11	9.97506e-12	1.06814e-11	1.06281e-11
11.8	1.01299e-11	9.5943e-12	9.56593e-12	1.00104e-11	9.97481e-12	1.06793e-11	1.06285e-11
11.82	1.01257e-11	9.59243e-12	9.55742e-12	1.00079e-11	9.97299e-12	1.06839e-11	1.06239e-11
11.84	1.01229e-11	9.58163e-12	9.5652e-12	1.00024e-11	9.96806e-12	1.06731e-11	1.06254e-11
11.86	1.01294e-11	9.5791e-12	9.56348e-12	1.00067e-11	9.96723e-12	1.0669e-11	1.0625e-11
11.88	1.01285e-11	9.58179e-12	9.56538e-12	1.00097e-11	9.97913e-12	1.06691e-11	1.06282e-11
11.9	1.01379e-11	9.59311e-12	9.56831e-12	1.00116e-11	9.97455e-12	1.06653e-11	1.0622e-11
11.92	1.01282e-11	9.58752e-12	9.56896e-12	1.00072e-11	9.97362e-12	1.06607e-11	1.06289e-11
11.94	1.01276e-11	9.58162e-12	9.56261e-12	1.00101e-11	9.98067e-12	1.06727e-11	1.06248e-11
11.96	1.01254e-11	9.58365e-12	9.56738e-12	1.00032e-11	9.97452e-12	1.06597e-11	1.06268e-11
11.98	1.01208e-11	9.59139e-12	9.5662e-12	1.00105e-11	9.97362e-12	1.06645e-11	1.06223e-11
12	1.01227e-11	9.58717e-12	9.56462e-12	1.00022e-11	9.97655e-12	1.06641e-11	1.06215e-11
12.02	1.01286e-11	9.5867e-12	9.56492e-12	1.00061e-11	9.97552e-12	1.06624e-11	1.06291e-11
12.04	1.01287e-11	9.59256e-12	9.56831e-12	1.00055e-11	9.97565e-12	1.06609e-11	1.06257e-11
12.06	1.01271e-11	9.59121e-12	9.56226e-12	1.00044e-11	9.97593e-12	1.06675e-11	1.06248e-11
12.08	1.01305e-11	9.58895e-12	9.57311e-12	1.00069e-11	9.98049e-12	1.06659e-11	1.06242e-11
12.1	1.01291e-11	9.58699e-12	9.56279e-12	1.0007e-11	9.97206e-12	1.06638e-11	1.0619e-11
12.12	1.01282e-11	9.59295e-12	9.56576e-12	1.00126e-11	9.97566e-12	1.06653e-11	1.06299e-11
12.14	1.01168e-11	9.59763e-12	9.56314e-12	1.00153e-11	9.97317e-12	1.06719e-11	1.06296e-11
12.16	1.01245e-11	9.59049e-12	9.56957e-12	1.00038e-11	9.98109e-12	1.06692e-11	1.06264e-11
12.18	1.01313e-11	9.58764e-12	9.56842e-12	1.00098e-11	9.97756e-12	1.06715e-11	1.06288e-11
12.2	1.01276e-11	9.5844e-12	9.56339e-12	1.00045e-11	9.9775e-12	1.06661e-11	1.06288e-11
12.22	1.01293e-11	9.58601e-12	9.56817e-12	1.00108e-11	9.97868e-12	1.0669e-11	1.06337e-11
12.24	1.01329e-11	9.58387e-12	9.56332e-12	1.00092e-11	9.97543e-12	1.06681e-11	1.06245e-11
12.26	1.01321e-11	9.58671e-12	9.56868e-12	1.00091e-11	9.9788e-12	1.06734e-11	1.06214e-11
12.28	1.01341e-11	9.59166e-12	9.564e-12	1.0011e-11	9.96971e-12	1.06832e-11	1.06233e-11
12.3	1.01269e-11	9.59671e-12	9.5702e-12	1.00097e-11	9.97274e-12	1.06851e-11	1.06242e-11
12.32	1.01231e-11	9.59144e-12	9.57111e-12	1.00088e-11	9.97775e-12	1.06747e-11	1.0623e-11
12.34	1.01349e-11	9.59723e-12	9.56989e-12	1.00063e-11	9.9713e-12	1.06764e-11	1.06257e-11
12.36	1.01192e-11	9.59566e-12	9.5632e-12	1.0008e-11	9.974e-12	1.06676e-11	1.0627e-11
12.38	1.01246e-11	9.5885e-12	9.56574e-12	1.00089e-11	9.97248e-12	1.06656e-11	1.06286e-11
12.4	1.01301e-11	9.59005e-12	9.57433e-12	1.0004e-11	9.9809e-12	1.06669e-11	1.06314e-11
12.42	1.01268e-11	9.59579e-12	9.56574e-12	1.00074e-11	9.97268e-12	1.06681e-11	1.06264e-11
12.44	1.0123e-11	9.59159e-12	9.56486e-12	1.00059e-11	9.9794e-12	1.06707e-11	1.06259e-11
12.46	1.01269e-11	9.58417e-12	9.56687e-12	1.00128e-11	9.98054e-12	1.06644e-11	1.06253e-11
12.48	1.01256e-11	9.58816e-12	9.56684e-12	1.0003e-11	9.97973e-12	1.06682e-11	1.06278e-11
12.5	1.01236e-11	9.59603e-12	9.56952e-12	1.00084e-11	9.9793e-12	1.06671e-11	1.06313e-11
12.52	1.01193e-11	9.58827e-12	9.57223e-12	1.00078e-11	9.97874e-12	1.06658e-11	1.06234e-11
12.54	1.01241e-11	9.59816e-12	9.56183e-12	1.00018e-11	9.97639e-12	1.06698e-11	1.0623e-11
12.56	1.0123e-11	9.59534e-12	9.57144e-12	1.00148e-11	9.97453e-12	1.06727e-11	1.06325e-11
12.58	1.01203e-11	9.59533e-12	9.5716e-12	1.00027e-11	9.98479e-12	1.06715e-11	1.06248e-11
12.6	1.01276e-11	9.60273e-12	9.57713e-12	1.00042e-11	9.98071e-12	1.06681e-11	1.06249e-11
12.62	1.01189e-11	9.60047e-12	9.57195e-12	1.00037e-11	9.98142e-12	1.06666e-11	1.06266e-11
12.64	1.01179e-11	9.60062e-12	9.56863e-12	1.00121e-11	9.97273e-12	1.06711e-11	1.06256e-11
12.66	1.01186e-11	9.60279e-12	9.56816e-12	1.00078e-11	9.98336e-12	1.06694e-11	1.06304e-11
12.68	1.01155e-11	9.59451e-12	9.57669e-12	1.00125e-11	9.98061e-12	1.0669e-11	1.06274e-11
12.7	1.01275e-11	9.59683e-12	9.57289e-12	1.00129e-11	9.97763e-12	1.06657e-11	1.06303e-11
12.72	1.012e-11	9.59673e-12	9.57361e-12	1.00135e-11	9.97818e-12	1.06658e-11	1.06311e-11
12.74	1.01218e-11	9.59615e-12	9.57449e-12	1.00075e-11	9.97905e-12	1.06706e-11	1.06256e-11
12.76	1.01231e-11	9.59379e-12	9.56851e-12	1.00089e-11	9.97815e-12	1.06681e-11	1.06261e-11
12.78	1.01178e-11	9.58937e-12	9.56944e-12	1.00104e-11	9.9847e-12	1.06665e-11	1.06274e-11
12.8	1.01218e-11	9.59894e-12	9.5726e-12	1.0012e-11	9.97803e-12	1.06683e-11	1.06301e-11
12.82	1.01242e-11	9.59521e-12	9.57778e-12	1.00219e-11	9.98079e-12	1.06739e-11	1.06315e-11
12.84	1.0123e-11	9.60529e-12	9.5682e-12	1.00038e-11	9.97868e-12	1.06714e-11	1.0629e-11
12.86	1.01196e-11	9.59815e-12	9.5707e-12	1.00162e-11	9.97906e-12	1.06746e-11	1.06217e-11
12.88	1.0123e-11	9.60104e-12	9.57253e-12	1.00105e-11	9.98395e-12	1.06725e-11	1.06247e-11
12.9	1.01248e-11	9.60053e-12	9.56924e-12	1.00197e-11	9.9844e-12	1.06644e-11	1.06273e-11
12.92	1.01224e-11	9.60242e-12	9.57094e-12	1.00142e-11	9.97888e-12	1.06727e-11	1.06245e-11
12.94	1.01197e-11	9.59338e-12	9.56887e-12	1.00085e-11	9.98588e-12	1.06671e-11	1.06309e-11
12.96	1.01225e-11	9.59662e-12	9.56541e-12	1.00109e-11	9.98267e-12	1.06727e-11	1.06263e-11
12.98	1.01256e-11	9.59165e-12	9.56667e-12	1.00105e-11	9.98214e-12	1.06701e-11	1.0629e-11
13	1.01243e-11	9.5983e-12	9.56918e-12	1.00057e-11	9.98098e-12	1.06685e-11	1.06259e-11
13.02	1.01172e-11	9.59147e-12	9.56761e-12	1.00102e-11	9.98002e-12	1.06653e-11	1.06277e-11
13.04	1.0125e-11	9.59649e-12	9.56487e-12	1.00032e-11	9.98275e-12	1.06702e-11	1.06315e-11
13.06	1.01246e-11	9.59703e-12	9.56739e-12	1.00065e-11	9.98291e-12	1.06679e-11	1.0627e-11
13.08	1.01245e-11	9.59857e-12	9.57039e-12	1.00063e-11	9.98285e-12	1.06723e-11	1.06359e-11
13.1	1.01225e-11	9.59762e-12	9.56934e-12	1.00063e-11	9.98405e-12	1.06735e-11	1.06266e-11
13.12	1.01177e-11	9.59829e-12	9.57123e-12	1.00127e-11	9.99291e-12	1.06746e-11	1.0631e-11
13.14	1.01241e-11	9.60375e-12	9.56904e-12	1.00036e-11	9.98398e-12	1.0669e-11	1.06292e-11
13.16	1.01184e-11	9.60553e-12	9.57013e-12	1.00092e-11	9.98282e-12	1.06721e-11	1.06223e-11
13.18	1.01316e-11	9.60043e-12	9.56753e-12	1.00051e-11	9.97836e-12	1.06702e-11	1.06279e-11
13.2	1.01264e-11	9.60243e-12	9.56972e-12	1.00133e-11	9.9764e-12	1.06663e-11	1.06297e-11
13.22	1.01273e-11	9.61223e-12	9.56891e-12	1.00101e-11	9.98333e-12	1.06718e-11	1.06257e-11
13.24	1.01278e-11	9.60265e-12	9.5635e-12	1.00097e-11	9.98357e-12	1.06727e-11	1.06325e-11
13.26	1.01233e-11	9.6042e-12	9.5728e-12	1.00068e-11	9.98265e-12	1.0676e-11	1.06254e-11
13.28	1.01272e-11	9.60228e-12	9.56265e-12	1.00062e-11	9.98697e-12	1.06805e-11	1.06247e-11
13.3	1.01164e-11	9.61095e-12	9.56721e-12	1.00147e-11	9.98199e-12	1.06836e-11	1.06247e-11
13.32	1.01273e-11	9.60465e-12	9.56877e-12	1.00104e-11	9.98495e-12	1.06878e-11	1.0627e-11
13.34	1.01256e-11	9.60342e-12	9.56624e-12	1.00064e-11	9.98349e-12	1.06845e-11	1.0623e-11
13.36	1.01244e-11	9.60648e-12	9.5623e-12	1.00085e-11	9.98476e-12	1.06835e-11	1.06296e-11
13.38	1.01315e-11	9.60396e-12	9.56396e-12	1.00032e-11	9.98748e-12	1.06809e-11	1.0631e-11
13.4	1.01194e-11	9.6061e-12	9.56636e-12	1.00083e-11	9.98541e-12	1.06745e-11	1.06297e-11
13.42	1.01287e-11	9.60735e-12	9.56379e-12	1.00024e-11	9.97892e-12	1.0686e-11	1.06258e-11
13.44	1.01301e-11	9.6032e-12	9.56839e-12	1.00082e-11	9.98911e-12	1.0686e-11	1.06266e-11
13.46	1.01268e-11	9.60974e-12	9.56786e-12	1.00088e-11	9.99473e-12	1.06778e-11	1.06349e-11
13.48	1.01318e-11	9.60406e-12	9.57285e-12	1.0018e-11	9.988e-12	1.06738e-11	1.06294e-11
13.5	1.0132e-11	9.60367e-12	9.5729e-12	1.00107e-11	9.98725e-12	1.06735e-11	1.06297e-11
13.52	1.01334e-11	9.60977e-12	9.57087e-12	1.00148e-11	9.99076e-12	1.06702e-11	1.06215e-11
13.54	1.01263e-11	9.60659e-12	9.5756e-12	1.00099e-11	9.98832e-12	1.06717e-11	1.06285e-11
13.56	1.01335e-11	9.60489e-12	9.5634e-12	1.00136e-11	9.98512e-12	1.06688e-11	1.06205e-11
13.58	1.01315e-11	9.60805e-12	9.56847e-12	1.00067e-11	9.98815e-12	1.06712e-11	1.06284e-11
13.6	1.01347e-11	9.61107e-12	9.56762e-12	1.0002e-11	9.98946e-12	1.0669e-11	1.06322e-11
13.62	1.01316e-11	9.60381e-12	9.56873e-12	1.00163e-11	9.99089e-12	1.0666e-11	1.06279e-11
13.64	1.01254e-11	9.60877e-12	9.56206e-12	1.00139e-11	9.9853e-12	1.06666e-11	1.06308e-11
13.66	1.01327e-11	9.60441e-12	9.57056e-12	1.00072e-11	9.98829e-12	1.06707e-11	1.06251e-11
13.68	1.01237e-11	9.60352e-12	9.56496e-12	1.00122e-11	9.99482e-12	1.06721e-11	1.06301e-11
13.7	1.01343e-11	9.60389e-12	9.56726e-12	1.00142e-11	9.98066e-12	1.06719e-11	1.06288e-11
13.72	1.01351e-11	9.60622e-12	9.57132e-12	1.00109e-11	9.98717e-12	1.0667e-11	1.0632e-11
13.74	1.01309e-11	9.61166e-12	9.56014e-12	1.00068e-11	9.98983e-12	1.06706e-11	1.06297e-11
13.76	1.01195e-11	9.60362e-12	9.56422e-12	1.00076e-11	9.98953e-12	1.06624e-11	1.06286e-11
13.78	1.01209e-11	9.61152e-12	9.56235e-12	1.00038e-11	9.98354e-12	1.06686e-11	1.06244e-11
13.8	1.0125e-11	9.60946e-12	9.56032e-12	1.00154e-11	9.99199e-12	1.06652e-11	1.06261e-11
13.82	1.01277e-11	9.60791e-12	9.55688e-12	1.00074e-11	9.99167e-12	1.06666e-11	1.06284e-11
13.84	1.013e-11	9.61158e-12	9.56399e-12	1.00062e-11	9.98822e-12	1.06656e-11	1.0626e-11
13.86	1.01346e-11	9.61157e-12	9.56246e-12	1.00013e-11	9.99041e-12	1.06615e-11	1.06305e-11
13.88	1.01254e-11	9.61075e-12	9.56023e-12	1.00022e-11	9.99139e-12	1.06643e-11	1.06252e-11
13.9	1.01365e-11	9.61077e-12	9.56255e-12	1.00112e-11	9.99037e-12	1.06735e-11	1.06256e-11
13.92	1.01301e-11	9.61439e-12	9.55604e-12	1.00092e-11	9.98764e-12	1.06665e-11	1.06301e-11
13.94	1.01274e-11	9.61442e-12	9.56382e-12	9.99964e-12	9.98761e-12	1.06669e-11	1.06258e-11
13.96	1.01287e-11	9.60991e-12	9.56121e-12	1.00158e-11	9.98482e-12	1.06633e-11	1.0628e-11
13.98	1.0126e-11	9.61634e-12	9.55818e-12	1.00061e-11	9.98908e-12	1.06636e-11	1.06255e-11
14	1.01294e-11	9.60951e-12	9.56371e-12	1.00041e-11	9.98345e-12	1.0666e-11	1.06188e-11
14.02	1.01239e-11	9.60436e-12	9.5563e-12	1.00083e-11	9.98926e-12	1.06705e-11	1.06239e-11
14.04	1.01303e-11	9.60578e-12	9.56057e-12	1.00081e-11	9.99278e-12	1.06686e-11	1.06223e-11
14.06	1.01232e-11	9.61671e-12	9.55156e-12	1.00124e-11	9.98227e-12	1.06709e-11	1.06229e-11
14.08	1.01309e-11	9.61879e-12	9.55379e-12	9.99941e-12	9.98164e-12	1.06702e-11	1.06246e-11
14.1	1.01347e-11	9.61227e-12	9.55498e-12	1.00053e-11	9.98888e-12	1.06671e-11	1.06201e-11
14.12	1.01286e-11	9.61146e-12	9.56225e-12	1.00045e-11	9.98881e-12	1.06692e-11	1.06234e-11
14.14	1.01306e-11	9.61331e-12	9.56154e-12	1.0004e-11	9.98619e-12	1.06715e-11	1.06197e-11
14.16	1.01312e-11	9.61144e-12	9.55983e-12	1.00024e-11	9.9931e-12	1.06725e-11	1.06195e-11
14.18	1.013e-11	9.61216e-12	9.55834e-12	9.99156e-12	9.98929e-12	1.06691e-11	1.06161e-11
14.2	1.0127e-11	9.60895e-12	9.56234e-12	1.00011e-11	9.98771e-12	1.06658e-11	1.06208e-11
14.22	1.01283e-11	9.61532e-12	9.56247e-12	1.00038e-11	9.99388e-12	1.06674e-11	1.06156e-11
14.24	1.01345e-11	9.61695e-12	9.55636e-12	1.00192e-11	9.98852e-12	1.0666e-11	1.0616e-11
14.26	1.01236e-11	9.61714e-12	9.56468e-12	1.00231e-11	9.98776e-12	1.06678e-11	1.06175e-11
14.28	1.01233e-11	9.62093e-12	9.5693e-12	1.00319e-11	9.98759e-12	1.06717e-11	1.0624e-11
14.3	1.0134e-11	9.6148e-12	9.55938e-12	1.00468e-11	9.99455e-12	1.06707e-11	1.0619e-11
14.32	1.01277e-11	9.61943e-12	9.56419e-12	1.00574e-11	9.98917e-12	1.06684e-11	1.06198e-11
14.34	1.01261e-11	9.6031e-12	9.55764e-12	1.00587e-11	9.99367e-12	1.0665e-11	1.06182e-11
14.36	1.01286e-11	9.61831e-12	9.55571e-12	1.00748e-11	9.99021e-12	1.06721e-11	1.06192e-11
14.38	1.01373e-11	9.62345e-12	9.56658e-12	1.00766e-11	9.99312e-12	1.06665e-11	1.06222e-11
14.4	1.01333e-11	9.62112e-12	9.55812e-12	1.00778e-11	9.99373e-12	1.06748e-11	1.06216e-11
14.42	1.01301e-11	9.61672e-12	9.56034e-12	1.00749e-11	9.9941e-12	1.06644e-11	1.06191e-11
14.44	1.0139e-11	9.62301e-12	9.56641e-12	1.00845e-11	9.98672e-12	1.06636e-11	1.06224e-11
14.46	1.01332e-11	9.61703e-12	9.56194e-12	1.00814e-11	9.98875e-12	1.06725e-11	1.06218e-11
14.48	1.01388e-11	9.62093e-12	9.56578e-12	1.00809e-11	9.98657e-12	1.06617e-11	1.06199e-11
14.5	1.01312e-11	9.62022e-12	9.5681e-12	1.00807e-11	9.99127e-12	1.06586e-11	1.06198e-11
14.52	1.01309e-11	9.61445e-12	9.57387e-12	1.00804e-11	9.98459e-12	1.06678e-11	1.06265e-11
14.54	1.01296e-11	9.61621e-12	9.56967e-12	1.00722e-11	9.9854e-12	1.06645e-11	1.06193e-11
14.56	1.01327e-11	9.61418e-12	9.57455e-12	1.00695e-11	9.99515e-12	1.0667e-11	1.06161e-11
14.58	1.01284e-11	9.61527e-12	9.57249e-12	1.00784e-11	9.98365e-12	1.06644e-11	1.06221e-11
14.6	1.01249e-11	9.61547e-12	9.56838e-12	1.00767e-11	9.98645e-12	1.06666e-11	1.06139e-11
14.62	1.01295e-11	9.61585e-12	9.57213e-12	1.00765e-11	9.98628e-12	1.06643e-11	1.06152e-11
14.64	1.0132e-11	9.61935e-12	9.57821e-12	1.00819e-11	9.98869e-12	1.06657e-11	1.06237e-11
14.66	1.01336e-11	9.62296e-12	9.56887e-12	1.00783e-11	9.99344e-12	1.06687e-11	1.06254e-11
14.68	1.01308e-11	9.61702e-12	9.56833e-12	1.00822e-11	9.99455e-12	1.06661e-11	1.06262e-11
14.7	1.01302e-11	9.6159e-12	9.56855e-12	1.00729e-11	9.99011e-12	1.06715e-11	1.06201e-11
14.72	1.01333e-11	9.61495e-12	9.55842e-12	1.00832e-11	9.98894e-12	1.06671e-11	1.06167e-11
14.74	1.01293e-11	9.62088e-12	9.56542e-12	1.00746e-11	9.9913e-12	1.06681e-11	1.06157e-11
14.76	1.01309e-11	9.6235e-12	9.56563e-12	1.00896e-11	9.98892e-12	1.06691e-11	1.06191e-11
14.78	1.01289e-11	9.62769e-12	9.57537e-12	1.0077e-11	9.98314e-12	1.06704e-11	1.06186e-11
14.8	1.01354e-11	9.61697e-12	9.56567e-12	1.00787e-11	9.98847e-12	1.06698e-11	1.06236e-11
14.82	1.01343e-11	9.61904e-12	9.57729e-12	1.00779e-11	9.9883e-12	1.06727e-11	1.06191e-11
14.84	1.01293e-11	9.61881e-12	9.56904e-12	1.00816e-11	9.98917e-12	1.06697e-11	1.06216e-11
14.86	1.01261e-11	9.61451e-12	9.57179e-12	1.00857e-11	9.99288e-12	1.06733e-11	1.0624e-11
14.88	1.01353e-11	9.61297e-12	9.57478e-12	1.00833e-11	9.98774e-12	1.06699e-11	1.06239e-11
14.9	1.01331e-11	9.61822e-12	9.5722e-12	1.00804e-11	9.99203e-12	1.06676e-11	1.06233e-11
14.92	1.01348e-11	9.6176e-12	9.57203e-12	1.0087e-11	9.98942e-12	1.06718e-11	1.06221e-11
14.94	1.01361e-11	9.62135e-12	9.58203e-12	1.00819e-11	9.99207e-12	1.0667e-11	1.06207e-11
14.96	1.01363e-11	9.61552e-12	9.57091e-12	1.00862e-11	9.98856e-12	1.06714e-11	1.06174e-11
14.98	1.01287e-11	9.61632e-12	9.57639e-12	1.00872e-11	9.99132e-12	1.06704e-11	1.0615e-11
15	1.01356e-11	9.60985e-12	9.57078e-12	1.00816e-11	9.98983e-12	1.06692e-11	1.06202e-11
15.02	1.01308e-11	9.61203e-12	9.5793e-12	1.00809e-11	9.98876e-12	1.06666e-11	1.06253e-11
15.04	1.01323e-11	9.61667e-12	9.57882e-12	1.00831e-11	9.99004e-12	1.0668e-11	1.0615e-11
15.06	1.01374e-11	9.61446e-12	9.57275e-12	1.00794e-11	9.99393e-12	1.06739e-11	1.0621e-11
15.08	1.01314e-11	9.61675e-12	9.57179e-12	1.00871e-11	9.99591e-12	1.06668e-11	1.06133e-11
15.1	1.01398e-11	9.62076e-12	9.57408e-12	1.00842e-11	9.98871e-12	1.06698e-11	1.06191e-11
15.12	1.01277e-11	9.62632e-12	9.56946e-12	1.00837e-11	9.9923e-12	1.06648e-11	1.06186e-11
15.14	1.01359e-11	9.62036e-12	9.56284e-12	1.00855e-11	9.99023e-12	1.06676e-11	1.06202e-11
15.16	1.01398e-11	9.61814e-12	9.56701e-12	1.00851e-11	9.98376e-12	1.06663e-11	1.06162e-11
15.18	1.01399e-11	9.62389e-12	9.56669e-12	1.00783e-11	9.98699e-12	1.06742e-11	1.06147e-11
15.2	1.014e-11	9.61288e-12	9.56299e-12	1.00817e-11	9.9902e-12	1.06682e-11	1.06213e-11
15.22	1.01338e-11	9.62494e-12	9.56733e-12	1.00869e-11	9.98731e-12	1.06699e-11	1.06164e-11
15.24	1.01248e-11	9.61532e-12	9.57202e-12	1.00839e-11	9.9862e-12	1.06747e-11	1.0621e-11
15.26	1.0135e-11	9.61479e-12	9.56959e-12	1.00832e-11	9.98843e-12	1.06713e-11	1.06198e-11
15.28	1.01365e-11	9.61763e-12	9.5645e-12	1.0094e-11	9.99091e-12	1.06677e-11	1.06226e-11
15.3	1.01364e-11	9.6218e-12	9.56736e-12	1.00816e-11	9.99107e-12	1.06677e-11	1.06154e-11
15.32	1.01275e-11	9.62647e-12	9.568e-12	1.00835e-11	9.99065e-12	1.0667e-11	1.06157e-11
15.34	1.0132e-11	9.62148e-12	9.56724e-12	1.00797e-11	9.99256e-12	1.06688e-11	1.06146e-11
15.36	1.01262e-11	9.62899e-12	9.57079e-12	1.00883e-11	9.99246e-12	1.06676e-11	1.06192e-11
15.38	1.01394e-11	9.61925e-12	9.57015e-12	1.00927e-11	9.98908e-12	1.06683e-11	1.06146e-11
15.4	1.01392e-11	9.62056e-12	9.57233e-12	1.00891e-11	9.99196e-12	1.06733e-11	1.06199e-11
15.42	1.01351e-11	9.61774e-12	9.56902e-12	1.00937e-11	9.99353e-12	1.06681e-11	1.0619e-11
15.44	1.01398e-11	9.62538e-12	9.56905e-12	1.00937e-11	9.99436e-12	1.06708e-11	1.06176e-11
15.46	1.01255e-11	9.62668e-12	9.56198e-12	1.00869e-11	9.99598e-12	1.06711e-11	1.06185e-11
15.48	1.01336e-11	9.62277e-12	9.56777e-12	1.00865e-11	9.99245e-12	1.06712e-11	1.0618e-11
15.5	1.01284e-11	9.62767e-12	9.57053e-12	1.00842e-11	9.99066e-12	1.06732e-11	1.06188e-11
15.52	1.01295e-11	9.6204e-12	9.57521e-12	1.00853e-11	9.9858e-12	1.0676e-11	1.06215e-11
15.54	1.01313e-11	9.62647e-12	9.57058e-12	1.00862e-11	9.99542e-12	1.06739e-11	1.06209e-11
15.56	1.01261e-11	9.62267e-12	9.55642e-12	1.00911e-11	9.99531e-12	1.06753e-11	1.06139e-11
15.58	1.01427e-11	9.61757e-12	9.56914e-12	1.00856e-11	9.98965e-12	1.0679e-11	1.0619e-11
15.6	1.01435e-11	9.62532e-12	9.56786e-12	1.00862e-11	9.9973e-12	1.06665e-11	1.06214e-11
15.62	1.01365e-11	9.61683e-12	9.56727e-12	1.00844e-11	9.99015e-12	1.06785e-11	1.06219e-11
15.64	1.01409e-11	9.62497e-12	9.56181e-12	1.00888e-11	9.99351e-12	1.06692e-11	1.06181e-11
15.66	1.01364e-11	9.61387e-12	9.57035e-12	1.00834e-11	9.99865e-12	1.06719e-11	1.06217e-11
15.68	1.01343e-11	9.62191e-12	9.57494e-12	1.00863e-11	9.99078e-12	1.0671e-11	1.06177e-11
15.7	1.0133e-11	9.6171e-12	9.5705e-12	1.00762e-11	9.9946e-12	1.06735e-11	1.06205e-11
15.72	1.01284e-11	9.61744e-12	9.57659e-12	1.00837e-11	9.99281e-12	1.0668e-11	1.06199e-11
15.74	1.01417e-11	9.61462e-12	9.57237e-12	1.00808e-11	1.00027e-11	1.06733e-11	1.06198e-11
15.76	1.01404e-11	9.61735e-12	9.57121e-12	1.00838e-11	9.99381e-12	1.067e-11	1.0618e-11
15.78	1.01436e-11	9.615e-12	9.57106e-12	1.00846e-11	9.99325e-12	1.06675e-11	1.06176e-11
15.8	1.01514e-11	9.61857e-12	9.58105e-12	1.00839e-11	1.00007e-11	1.0673e-11	1.06191e-11
15.82	1.01557e-11	9.62471e-12	9.57271e-12	1.00824e-11	9.99359e-12	1.06705e-11	1.06194e-11
15.84	1.01675e-11	9.61985e-12	9.58008e-12	1.00775e-11	9.99884e-12	1.06757e-11	1.06165e-11
15.86	1.01727e-11	9.62434e-12	9.57919e-12	1.00888e-11	9.99067e-12	1.06714e-11	1.06213e-11
15.88	1.01745e-11	9.61986e-12	9.57059e-12	1.00816e-11	9.98933e-12	1.06671e-11	1.0617e-11
15.9	1.01841e-11	9.61667e-12	9.57532e-12	1.00819e-11	9.98757e-12	1.06742e-11	1.062e-11
15.92	1.01795e-11	9.61913e-12	9.57174e-12	1.00894e-11	9.99218e-12	1.06723e-11	1.06285e-11
15.94	1.01925e-11	9.62931e-12	9.57841e-12	1.00791e-11	9.9986e-12	1.06718e-11	1.06226e-11
15.96	1.01857e-11	9.61978e-12	9.57279e-12	1.00818e-11	9.99267e-12	1.06732e-11	1.06162e-11
15.98	1.01915e-11	9.62294e-12	9.57498e-12	1.00836e-11	9.99498e-12	1.0679e-11	1.06201e-11
16	1.01985e-11	9.6237e-12	9.57153e-12	1.00805e-11	9.99454e-12	1.06735e-11	1.06173e-11
16.02	1.01951e-11	9.62085e-12	9.56875e-12	1.00846e-11	1.00003e-11	1.06772e-11	1.06213e-11
16.04	1.02047e-11	9.62881e-12	9.57184e-12	1.00816e-11	9.99188e-12	1.06791e-11	1.06242e-11
16.06	1.02059e-11	9.62538e-12	9.56453e-12	1.00846e-11	9.99626e-12	1.06703e-11	1.06222e-11
16.08	1.02045e-11	9.62181e-12	9.57081e-12	1.00786e-11	9.99708e-12	1.06706e-11	1.06168e-11
16.1	1.02025e-11	9.61627e-12	9.57349e-12	1.00861e-11	9.99354e-12	1.06758e-11	1.06246e-11
16.12	1.02005e-11	9.62176e-12	9.57406e-12	1.00734e-11	1.00013e-11	1.06743e-11	1.06174e-11
16.14	1.01967e-11	9.62099e-12	9.56915e-12	1.00868e-11	9.99584e-12	1.06708e-11	1.06164e-11
16.16	1.0199e-11	9.62364e-12	9.57506e-12	1.00772e-11	1.00002e-11	1.067e-11	1.06207e-11
16.18	1.02058e-11	9.61822e-12	9.57136e-12	1.00762e-11	1.00071e-11	1.06683e-11	1.06214e-11
16.2	1.02103e-11	9.6155e-12	9.57616e-12	1.00823e-11	9.99703e-12	1.0667e-11	1.06172e-11
16.22	1.0213e-11	9.6211e-12	9.57425e-12	1.00879e-11	9.99537e-12	1.06695e-11	1.06266e-11
16.24	1.02072e-11	9.63189e-12	9.57099e-12	1.00859e-11	9.99713e-12	1.06721e-11	1.06211e-11
16.26	1.02021e-11	9.62346e-12	9.57571e-12	1.00835e-11	9.99399e-12	1.06675e-11	1.06237e-11
16.28	1.02041e-11	9.6286e-12	9.57083e-12	1.00848e-11	1.00064e-11	1.06663e-11	1.06171e-11
16.3	1.02055e-11	9.62504e-12	9.57092e-12	1.00795e-11	1.00192e-11	1.06689e-11	1.06181e-11
16.32	1.02021e-11	9.62854e-12	9.57725e-12	1.0086e-11	1.00259e-11	1.06718e-11	1.06179e-11
16.34	1.02089e-11	9.6237e-12	9.57259e-12	1.00791e-11	1.00335e-11	1.0673e-11	1.06189e-11
16.36	1.02103e-11	9.62611e-12	9.57227e-12	1.0081e-11	1.00483e-11	1.06746e-11	1.06236e-11
16.38	1.02076e-11	9.62878e-12	9.572e-12	1.00815e-11	1.00501e-11	1.06713e-11	1.06215e-11
16.4	1.02045e-11	9.62615e-12	9.5736e-12	1.00827e-11	1.00438e-11	1.06662e-11	1.06199e-11
16.42	1.02118e-11	9.62485e-12	9.57143e-12	1.00787e-11	1.00539e-11	1.06667e-11	1.06184e-11
16.44	1.02083e-11	9.62825e-12	9.57799e-12	1.00808e-11	1.0053e-11	1.06648e-11	1.06176e-11
16.46	1.02128e-11	9.63016e-12	9.57362e-12	1.00785e-11	1.00593e-11	1.06722e-11	1.06177e-11
16.48	1.02062e-11	9.6275e-12	9.57538e-12	1.0076e-11	1.00576e-11	1.06706e-11	1.06239e-11
16.5	1.0207e-11	9.6307e-12	9.5718e-12	1.00741e-11	1.00617e-11	1.06721e-11	1.06214e-11
16.52	1.02067e-11	9.62161e-12	9.57959e-12	1.00831e-11	1.00629e-11	1.06666e-11	1.0648e-11
16.54	1.02089e-11	9.62722e-12	9.58088e-12	1.00803e-11	1.0064e-11	1.06758e-11	1.06225e-11
16.56	1.02054e-11	9.62337e-12	9.57465e-12	1.00769e-11	1.00656e-11	1.06681e-11	1.06191e-11
16.58	1.02099e-11	9.62195e-12	9.58671e-12	1.00817e-11	1.00609e-11	1.06681e-11	1.06219e-11
16.6	1.02065e-11	9.6258e-12	9.57329e-12	1.00801e-11	1.00592e-11	1.06713e-11	1.06255e-11
16.62	1.02033e-11	9.61827e-12	9.58263e-12	1.00813e-11	1.00545e-11	1.06748e-11	1.06231e-11
16.64	1.02045e-11	9.62599e-12	9.57583e-12	1.00821e-11	1.00624e-11	1.06778e-11	1.06269e-11
16.66	1.02104e-11	9.62186e-12	9.58072e-12	1.00855e-11	1.00633e-11	1.06748e-11	1.06182e-11
16.68	1.02089e-11	9.62197e-12	9.5831e-12	1.00832e-11	1.0061e-11	1.0671e-11	1.06228e-11
16.7	1.02115e-11	9.6147e-12	9.58247e-12	1.00834e-11	1.00625e-11	1.06768e-11	1.06229e-11
16.72	1.02055e-11	9.61923e-12	9.5743e-12	1.00872e-11	1.00623e-11	1.06803e-11	1.06213e-11
16.74	1.02039e-11	9.61662e-12	9.57461e-12	1.00765e-11	1.00651e-11	1.06734e-11	1.06225e-11
16.76	1.02067e-11	9.61769e-12	9.57616e-12	1.00852e-11	1.00543e-11	1.06682e-11	1.06216e-11
16.78	1.0205e-11	9.61156e-12	9.58314e-12	1.00768e-11	1.00604e-11	1.06761e-11	1.06199e-11
16.8	1.02092e-11	9.60432e-12	9.57458e-12	1.00816e-11	1.00555e-11	1.06727e-11	1.06237e-11
16.82	1.02067e-11	9.59801e-12	9.57858e-12	1.00857e-11	1.00586e-11	1.06721e-11	1.063e-11
16.84	1.02019e-11	9.61025e-12	9.58156e-12	1.00748e-11	1.0057e-11	1.06753e-11	1.06351e-11
16.86	1.02026e-11	9.60426e-12	9.58425e-12	1.00752e-11	1.0061e-11	1.06729e-11	1.06291e-11
16.88	1.02051e-11	9.60141e-12	9.58284e-12	1.00759e-11	1.00577e-11	1.06711e-11	1.06336e-11
16.9	1.0206e-11	9.59437e-12	9.5826e-12	1.00787e-11	1.00563e-11	1.06783e-11	1.06354e-11
16.92	1.02137e-11	9.60702e-12	9.58266e-12	1.00862e-11	1.00596e-11	1.0677e-11	1.06306e-11
16.94	1.02048e-11	9.60087e-12	9.57405e-12	1.0083e-11	1.00534e-11	1.06807e-11	1.06362e-11
16.96	1.02104e-11	9.60425e-12	9.57834e-12	1.00801e-11	1.00601e-11	1.06846e-11	1.06355e-11
16.98	1.02096e-11	9.60318e-12	9.58067e-12	1.00821e-11	1.00566e-11	1.06935e-11	1.06356e-11
17	1.02074e-11	9.60444e-12	9.57842e-12	1.00801e-11	1.00546e-11	1.07e-11	1.06382e-11
17.02	1.02097e-11	9.63231e-12	9.57801e-12	1.00819e-11	1.00531e-11	1.07062e-11	1.0637e-11
17.04	1.02001e-11	9.64671e-12	9.59196e-12	1.00821e-11	1.00574e-11	1.07133e-11	1.06431e-11
17.06	1.02001e-11	9.6421e-12	9.6151e-12	1.00802e-11	1.00554e-11	1.07141e-11	1.06451e-11
17.08	1.02059e-11	9.64895e-12	9.63106e-12	1.00794e-11	1.00544e-11	1.07222e-11	1.06442e-11
17.1	1.02086e-11	9.64059e-12	9.63632e-12	1.00791e-11	1.00513e-11	1.07212e-11	1.06422e-11
17.12	1.02012e-11	9.64652e-12	9.62911e-12	1.0081e-11	1.00512e-11	1.0722e-11	1.06479e-11
17.14	1.02104e-11	9.64232e-12	9.64088e-12	1.00765e-11	1.0049e-11	1.07297e-11	1.06406e-11
17.16	1.02066e-11	9.64809e-12	9.65177e-12	1.00772e-11	1.0056e-11	1.07274e-11	1.06412e-11
17.18	1.02099e-11	9.64759e-12	9.6522e-12	1.00745e-11	1.00547e-11	1.07308e-11	1.06412e-11
17.2	1.02041e-11	9.65424e-12	9.65461e-12	1.00786e-11	1.00519e-11	1.07289e-11	1.06459e-11
17.22	1.02067e-11	9.64886e-12	9.66138e-12	1.00808e-11	1.00488e-11	1.07292e-11	1.06448e-11
17.24	1.02036e-11	9.64565e-12	9.66563e-12	1.00731e-11	1.00473e-11	1.07287e-11	1.06444e-11
17.26	1.02038e-11	9.65531e-12	9.66225e-12	1.00802e-11	1.00503e-11	1.07269e-11	1.06472e-11
17.28	1.02099e-11	9.65216e-12	9.67224e-12	1.00841e-11	1.00564e-11	1.07338e-11	1.06423e-11
17.3	1.02068e-11	9.65582e-12	9.67641e-12	1.00799e-11	1.00527e-11	1.07322e-11	1.06469e-11
17.32	1.0212e-11	9.65002e-12	9.66869e-12	1.00805e-11	1.00589e-11	1.07325e-11	1.06466e-11
17.34	1.02077e-11	9.65509e-12	9.66947e-12	1.00768e-11	1.00547e-11	1.07295e-11	1.06493e-11
17.36	1.02108e-11	9.65402e-12	9.67229e-12	1.00775e-11	1.00533e-11	1.07266e-11	1.06491e-11
17.38	1.02142e-11	9.65584e-12	9.67525e-12	1.00723e-11	1.00433e-11	1.07336e-11	1.06531e-11
17.4	1.02103e-11	9.65603e-12	9.67235e-12	1.00789e-11	1.00473e-11	1.07322e-11	1.06469e-11
17.42	1.02021e-11	9.65199e-12	9.67715e-12	1.00698e-11	1.00468e-11	1.07246e-11	1.065e-11
17.44	1.02089e-11	9.65144e-12	9.68902e-12	1.0075e-11	1.00572e-11	1.07323e-11	1.06484e-11
17.46	1.02087e-11	9.65687e-12	9.68811e-12	1.00765e-11	1.0055e-11	1.07351e-11	1.06448e-11
17.48	1.02123e-11	9.65815e-12	9.67496e-12	1.00784e-11	1.00561e-11	1.07282e-11	1.065e-11
17.5	1.02048e-11	9.6565e-12	9.68313e-12	1.00801e-11	1.00522e-11	1.07289e-11	1.06486e-11
17.52	1.02085e-11	9.64783e-12	9.67893e-12	1.00817e-11	1.00548e-11	1.07348e-11	1.06484e-11
17.54	1.0206e-11	9.65061e-12	9.6761e-12	1.00758e-11	1.00548e-11	1.07234e-11	1.06482e-11
17.56	1.02061e-11	9.64985e-12	9.67996e-12	1.00762e-11	1.00531e-11	1.07341e-11	1.06484e-11
17.58	1.02028e-11	9.65755e-12	9.67905e-12	1.00798e-11	1.00569e-11	1.07316e-11	1.06468e-11
17.6	1.02038e-11	9.65449e-12	9.67877e-12	1.00782e-11	1.00535e-11	1.07405e-11	1.06478e-11
17.62	1.02077e-11	9.64854e-12	9.67765e-12	1.00717e-11	1.00535e-11	1.07303e-11	1.06534e-11
17.64	1.02012e-11	9.65394e-12	9.6716e-12	1.0077e-11	1.00549e-11	1.07222e-11	1.06486e-11
17.66	1.02052e-11	9.65398e-12	9.68095e-12	1.00794e-11	1.00522e-11	1.07297e-11	1.06465e-11
17.68	1.02047e-11	9.65448e-12	9.68914e-12	1.00817e-11	1.00518e-11	1.07306e-11	1.06514e-11
17.7	1.01971e-11	9.64999e-12	9.68673e-12	1.00742e-11	1.00477e-11	1.07274e-11	1.06506e-11
17.72	1.02043e-11	9.65694e-12	9.6814e-12	1.00802e-11	1.0056e-11	1.07263e-11	1.06497e-11
17.74	1.0206e-11	9.65444e-12	9.6894e-12	1.00774e-11	1.00556e-11	1.0727e-11	1.06467e-11
17.76	1.02083e-11	9.65646e-12	9.68038e-12	1.00768e-11	1.00608e-11	1.07307e-11	1.06494e-11
17.78	1.02103e-11	9.65054e-12	9.68395e-12	1.00793e-11	1.00525e-11	1.07322e-11	1.06536e-11
17.8	1.02067e-11	9.66116e-12	9.68669e-12	1.00753e-11	1.00578e-11	1.0733e-11	1.06518e-11
17.82	1.02052e-11	9.65103e-12	9.68564e-12	1.00886e-11	1.00557e-11	1.07343e-11	1.06552e-11
17.84	1.02112e-11	9.65335e-12	9.68556e-12	1.00814e-11	1.00507e-11	1.07376e-11	1.06503e-11
17.86	1.0202e-11	9.6529e-12	9.68349e-12	1.00851e-11	1.00571e-11	1.07356e-11	1.06458e-11
17.88	1.02136e-11	9.65762e-12	9.68188e-12	1.00751e-11	1.00534e-11	1.07297e-11	1.06509e-11
17.9	1.02074e-11	9.65006e-12	9.68495e-12	1.00843e-11	1.0055e-11	1.0727e-11	1.06533e-11
17.92	1.02053e-11	9.65596e-12	9.67679e-12	1.00836e-11	1.00545e-11	1.07358e-11	1.06483e-11
17.94	1.02085e-11	9.65738e-12	9.68615e-12	1.0077e-11	1.00556e-11	1.07335e-11	1.06463e-11
17.96	1.02027e-11	9.65381e-12	9.68355e-12	1.00819e-11	1.0055e-11	1.07315e-11	1.06534e-11
17.98	1.0206e-11	9.65665e-12	9.67949e-12	1.00807e-11	1.0055e-11	1.07332e-11	1.06492e-11
18	1.02084e-11	9.65532e-12	9.67367e-12	1.00824e-11	1.00597e-11	1.073e-11	1.06471e-11
18.02	1.02079e-11	9.66114e-12	9.68464e-12	1.0069e-11	1.0046e-11	1.07318e-11	1.0648e-11
18.04	1.0206e-11	9.65776e-12	9.67807e-12		1.00563e-11	1.07398e-11	1.0649e-11
18.06	1.02056e-11	9.65987e-12	9.67645e-12		1.00561e-11	1.07407e-11	1.06501e-11
18.08	1.02032e-11	9.66115e-12	9.6685e-12		1.00544e-11	1.07383e-11	1.06525e-11
18.1	1.02098e-11	9.65639e-12	9.67481e-12		1.00543e-11	1.07283e-11	1.06495e-11
18.12	1.02097e-11	9.65898e-12	9.67437e-12		1.00536e-11	1.07328e-11	1.06499e-11
18.14	1.02103e-11	9.65967e-12	9.67464e-12		1.00576e-11	1.07383e-11	1.06527e-11
18.16	1.02075e-11	9.65746e-12	9.67275e-12		1.00486e-11	1.07313e-11	1.06444e-11
18.18	1.02046e-11	9.65971e-12	9.67352e-12		1.0061e-11	1.07259e-11	1.06433e-11
18.2	1.02092e-11	9.65468e-12	9.67312e-12		1.00609e-11	1.07314e-11	1.06479e-11
18.22	1.0211e-11	9.65835e-12	9.67591e-12		1.00566e-11	1.07381e-11	1.06499e-11
18.24	1.02092e-11	9.65694e-12	9.6688e-12		1.0056e-11	1.0742e-11	1.06463e-11
18.26	1.0214e-11	9.65824e-12	9.67067e-12		1.00543e-11	1.07408e-11	1.06519e-11
18.28	1.02135e-11	9.66351e-12	9.67349e-12		1.00515e-11	1.0734e-11	1.06472e-11
18.3	1.0206e-11	9.66149e-12	9.67052e-12		1.00582e-11	1.07444e-11	1.06488e-11
18.32	1.02103e-11	9.65316e-12	9.66696e-12		1.00545e-11	1.07357e-11	1.06458e-11
18.34	1.02024e-11	9.66442e-12	9.6711e-12		1.00505e-11	1.07305e-11	1.06462e-11
18.36	1.0203e-11	9.66131e-12	9.67946e-12		1.00565e-11	1.07308e-11	1.06438e-11
18.38	1.02022e-11	9.6684e-12	9.6707e-12		1.00484e-11	1.07362e-11	1.06376e-11
18.4	1.02029e-11	9.65645e-12	9.66627e-12		1.00526e-11	1.07375e-11	1.06459e-11
18.42	1.02053e-11	9.66284e-12	9.66495e-12		1.00567e-11	1.07244e-11	1.06377e-11
18.44	1.02107e-11	9.66242e-12	9.6675e-12		1.00572e-11	1.07337e-11	1.06447e-11
18.46	1.02073e-11	9.65806e-12	9.66278e-12		1.00561e-11	1.07336e-11	1.06467e-11
18.48	1.02087e-11	9.66628e-12	9.66547e-12		1.00562e-11	1.07323e-11	1.06401e-11
18.5	1.02056e-11	9.66027e-12	9.66034e-12		1.00565e-11	1.07318e-11	1.06408e-11
18.52	1.02028e-11	9.66377e-12	9.66946e-12		1.00536e-11	1.07376e-11	1.06416e-11
18.54	1.02075e-11	9.65885e-12	9.67125e-12		1.00581e-11	1.07342e-11	1.06415e-11
18.56	1.02111e-11	9.65869e-12	9.663e-12		1.00545e-11	1.0733e-11	1.06446e-11
18.58	1.02088e-11	9.66784e-12	9.65858e-12		1.00553e-11	1.07424e-11	1.06424e-11
18.6	1.02082e-11	9.66482e-12	9.65699e-12		1.00503e-11	1.07393e-11	1.06489e-11
18.62	1.02054e-11	9.66157e-12	9.65391e-12		1.00503e-11	1.07367e-11	1.06444e-11
18.64	1.02077e-11	9.65809e-12	9.65742e-12		1.00634e-11	1.07348e-11	1.06429e-11
18.66	1.02058e-11	9.66138e-12	9.65739e-12		1.006e-11	1.07328e-11	1.06435e-11
18.68	1.02134e-11	9.66262e-12	9.66067e-12		1.00528e-11	1.07276e-11	1.06436e-11
18.7	1.02043e-11	9.66275e-12	9.65388e-12		1.00546e-11	1.07382e-11	1.06459e-11
18.72	1.02134e-11	9.66132e-12	9.65001e-12		1.0058e-11	1.07412e-11	1.06399e-11
18.74	1.02096e-11	9.6582e-12	9.65122e-12		1.00595e-11	1.07359e-11	1.06446e-11
18.76	1.02058e-11	9.65382e-12	9.65372e-12		1.00593e-11	1.07321e-11	1.06527e-11
18.78	1.02085e-11	9.65353e-12	9.65914e-12		1.00612e-11	1.07283e-11	1.0649e-11
18.8	1.02114e-11	9.66477e-12	9.65329e-12		1.00553e-11	1.07323e-11	1.06463e-11
18.82	1.02101e-11	9.66369e-12	9.65165e-12		1.00584e-11	1.0729e-11	1.06411e-11
18.84	1.0205e-11	9.66359e-12	9.6476e-12		1.00596e-11	1.07257e-11	1.0645e-11
18.86	1.02118e-11	9.66558e-12	9.65133e-12		1.00601e-11	1.07268e-11	1.0639e-11
18.88	1.02103e-11	9.66351e-12	9.64753e-12		1.00647e-11	1.07371e-11	1.06386e-11
18.9	1.02069e-11	9.66641e-12	9.64413e-12		1.00602e-11	1.07291e-11	1.06439e-11
18.92	1.02079e-11	9.67696e-12	9.64363e-12		1.00611e-11	1.07405e-11	1.06457e-11
18.94	1.02064e-11	9.66103e-12	9.63961e-12		1.00522e-11	1.07381e-11	1.06408e-11
18.96	1.02078e-11	9.66541e-12	9.63386e-12		1.0057e-11	1.0734e-11	1.06439e-11
18.98	1.02087e-11	9.66729e-12	9.64076e-12		1.00619e-11	1.07267e-11	1.06443e-11
19	1.02072e-11	9.66967e-12	9.65058e-12		1.00652e-11	1.07295e-11	1.06441e-11
19.02	1.02078e-11	9.66918e-12	9.63967e-12		1.00593e-11	1.07302e-11	1.06424e-11
19.04	1.02028e-11	9.66916e-12	9.64579e-12		1.00599e-11	1.07328e-11	1.06453e-11
19.06	1.021e-11	9.66617e-12	9.63812e-12		1.00592e-11	1.0731e-11	1.06463e-11
19.08	1.02045e-11	9.6668e-12	9.63533e-12		1.00612e-11	1.07241e-11	1.06387e-11
19.1	1.02047e-11	9.66546e-12	9.63671e-12		1.00619e-11	1.07308e-11	1.06414e-11
19.12	1.02087e-11	9.67089e-12	9.63539e-12		1.00561e-11	1.07332e-11	1.06436e-11
19.14	1.0202e-11	9.6726e-12	9.6391e-12		1.00469e-11	1.07349e-11	1.06425e-11
19.16	1.02088e-11	9.66687e-12	9.63895e-12		1.00613e-11	1.07352e-11	1.06425e-11
19.18	1.01925e-11	9.65795e-12	9.6302e-12		1.00573e-11	1.0739e-11	1.06421e-11
19.2	1.0197e-11	9.66271e-12	9.63559e-12		1.00565e-11	1.07371e-11	1.06473e-11
19.22	1.01961e-11	9.66123e-12	9.64316e-12		1.0058e-11	1.07301e-11	1.06455e-11
19.24	1.01977e-11	9.66169e-12	9.64226e-12		1.00566e-11	1.07316e-11	1.06473e-11
19.26	1.01893e-11	9.66341e-12	9.64399e-12		1.00568e-11	1.07376e-11	1.06496e-11
19.28	1.01952e-11	9.6623e-12	9.63885e-12		1.00542e-11	1.07261e-11	1.06532e-11
19.3	1.01937e-11	9.6603e-12	9.63883e-12		1.00572e-11	1.07338e-11	1.06481e-11
19.32	1.01962e-11	9.66636e-12	9.64071e-12		1.0055e-11	1.07434e-11	1.06431e-11
19.34	1.01946e-11	9.66455e-12	9.62955e-12		1.00573e-11	1.07474e-11	1.06469e-11
19.36	1.02026e-11	9.67217e-12	9.63064e-12		1.00577e-11	1.07395e-11	1.064e-11
19.38	1.0199e-11	9.65571e-12	9.63921e-12		1.00553e-11	1.07353e-11	1.06473e-11
19.4	1.0191e-11	9.66259e-12	9.63398e-12		1.0057e-11	1.07325e-11	1.06516e-11
19.42	1.01957e-11	9.66389e-12	9.63942e-12		1.00576e-11	1.07345e-11	1.06473e-11
19.44	1.0196e-11	9.66249e-12	9.63865e-12		1.006e-11	1.07297e-11	1.06516e-11
19.46	1.0195e-11	9.66026e-12	9.63925e-12		1.00611e-11	1.0736e-11	1.06453e-11
19.48	1.01987e-11	9.6677e-12	9.63313e-12		1.00594e-11	1.07296e-11	1.06414e-11
19.5	1.02e-11	9.66499e-12	9.63581e-12		1.00583e-11	1.07307e-11	1.06513e-11
19.52	1.02036e-11	9.66446e-12	9.63644e-12		1.00552e-11	1.0735e-11	1.06474e-11
19.54	1.02026e-11	9.66718e-12	9.63937e-12		1.00549e-11	1.07317e-11	1.06526e-11
19.56	1.02043e-11	9.66267e-12	9.64283e-12		1.0059e-11	1.07295e-11	1.06464e-11
19.58	1.0204e-11	9.66464e-12	9.64329e-12		1.00581e-11	1.07368e-11	1.06424e-11
19.6	1.01908e-11	9.66205e-12	9.6479e-12		1.00601e-11	1.07354e-11	1.0647e-11
19.62	1.01996e-11	9.65904e-12	9.64499e-12		1.00616e-11	1.07278e-11	1.06499e-11
19.64	1.02018e-11	9.66456e-12	9.64291e-12		1.00633e-11	1.07308e-11	1.0648e-11
19.66	1.02016e-11	9.66178e-12	9.64124e-12		1.00626e-11	1.07313e-11	1.06452e-11
19.68	1.02024e-11	9.66801e-12	9.63565e-12		1.00521e-11	1.07368e-11	1.06427e-11
19.7	1.0202e-11	9.66738e-12	9.6403e-12		1.00606e-11	1.07341e-11	1.06455e-11
19.72	1.02044e-11	9.66476e-12	9.63996e-12		1.00608e-11	1.07308e-11	1.06414e-11
19.74	1.02016e-11	9.66462e-12	9.63518e-12		1.00624e-11	1.0735e-11	1.06442e-11
19.76	1.02046e-11	9.65821e-12	9.63535e-12		1.00621e-11	1.07292e-11	1.06512e-11
19.78	1.02042e-11	9.66371e-12	9.63821e-12		1.00621e-11	1.07346e-11	1.06434e-11
19.8	1.0198e-11	9.66135e-12	9.63766e-12		1.00561e-11	1.07352e-11	1.06437e-11
19.82	1.02042e-11	9.66215e-12	9.6422e-12		1.00554e-11	1.0729e-11	1.0643e-11
19.84	1.02034e-11	9.66646e-12	9.63464e-12		1.00597e-11	1.07308e-11	1.06444e-11
19.86	1.02026e-11	9.65785e-12	9.6486e-12		1.00582e-11	1.07377e-11	1.06467e-11
19.88	1.02147e-11	9.66863e-12	9.6473e-12		1.00594e-11	1.07358e-11	1.06463e-11
19.9	1.01989e-11	9.65974e-12	9.64809e-12		1.00538e-11	1.07329e-11	1.06447e-11
19.92	1.01939e-11	9.66066e-12	9.64472e-12		1.00597e-11	1.07329e-11	1.06428e-11
19.94	1.01981e-11	9.6617e-12	9.64577e-12		1.00594e-11	1.07321e-11	1.06548e-11
19.96	1.01904e-11	9.65527e-12	9.6473e-12		1.00602e-11	1.07326e-11	1.06499e-11
19.98	1.02009e-11	9.65737e-12	9.63869e-12		1.00647e-11	1.07348e-11	1.06471e-11
20	1.02023e-11	9.66023e-12	9.6408e-12		1.00627e-11	1.07325e-11	1.06436e-11
20.02	1.01983e-11	9.65917e-12	9.64615e-12		1.00669e-11	1.07326e-11	1.06468e-11
20.04	1.01978e-11	9.66477e-12	9.64183e-12		1.00652e-11	1.07336e-11
20.06	1.01942e-11	9.66405e-12	9.64509e-12		1.00573e-11	1.07359e-11
20.08	1.01984e-11	9.65873e-12	9.64617e-12		1.00565e-11	1.07348e-11
20.1	1.02009e-11	9.66e-12	9.64326e-12		1.00669e-11	1.07283e-11
20.12	1.01909e-11	9.66504e-12	9.63961e-12		1.00674e-11	1.07345e-11
20.14	1.01993e-11	9.6671e-12	9.63966e-12		1.00636e-11	1.07304e-11
20.16	1.02004e-11	9.66109e-12	9.64009e-12		1.00601e-11	1.07315e-11
20.18	1.0199e-11	9.65823e-12	9.64141e-12		1.00643e-11	1.07336e-11
20.2	1.02037e-11	9.66812e-12	9.6415e-12		1.00541e-11	1.07281e-11
20.22	1.01979e-11	9.6634e-12	9.63854e-12		1.00586e-11	1.07345e-11
20.24	1.02e-11	9.66328e-12	9.63523e-12		1.00591e-11	1.07339e-11
20.26	1.02006e-11	9.66693e-12	9.65058e-12		1.00596e-11	1.07349e-11
20.28	1.01943e-11	9.6624e-12	9.65231e-12		1.00653e-11	1.07355e-11
20.3	1.01956e-11	9.6617e-12	9.65007e-12		1.00628e-11	1.07347e-11
20.32	1.02026e-11	9.66336e-12	9.64348e-12		1.00571e-11	1.07353e-11
20.34	1.02024e-11	9.66807e-12	9.6496e-12		1.00576e-11	1.07408e-11
20.36	1.02008e-11	9.65965e-12	9.65132e-12		1.00536e-11	1.07417e-11
20.38	1.01967e-11	9.66403e-12	9.64801e-12		1.00557e-11	1.07438e-11
20.4	1.01955e-11	9.66687e-12	9.64921e-12		1.00578e-11	1.07325e-11
20.42	1.01996e-11	9.66428e-12	9.64898e-12		1.00497e-11	1.07409e-11
20.44	1.02017e-11	9.66682e-12	9.65719e-12		1.00533e-11	1.07329e-11
20.46	1.02019e-11	9.65921e-12	9.65508e-12		1.00615e-11	1.07365e-11
20.48	1.01989e-11	9.65969e-12	9.64662e-12		1.00657e-11	1.07411e-11
20.5	1.01955e-11	9.65912e-12	9.65128e-12		1.00536e-11	1.07358e-11
20.52	1.01981e-11	9.65951e-12	9.64161e-12		1.00644e-11	1.07385e-11
20.54	1.0197e-11	9.6712e-12	9.64944e-12		1.00619e-11	1.07265e-11
20.56	1.01992e-11	9.66687e-12	9.64614e-12		1.00611e-11	1.07405e-11
20.58	1.02041e-11	9.66813e-12	9.64845e-12		1.00564e-11	1.07381e-11
20.6	1.0201e-11	9.67257e-12	9.65116e-12		1.00584e-11	1.07417e-11
20.62	1.01946e-11	9.67244e-12	9.65282e-12		1.00639e-11	1.07367e-11
20.64	1.01981e-11	9.67451e-12	9.64614e-12		1.00623e-11	1.07368e-11
20.66	1.02013e-11	9.67212e-12	9.64622e-12		1.00598e-11	1.07365e-11
20.68	1.01983e-11	9.67778e-12	9.64793e-12		1.00568e-11	1.07352e-11
20.7	1.01964e-11	9.67403e-12	9.64887e-12		1.00657e-11	1.07365e-11
20.72	1.01975e-11	9.66454e-12	9.6573e-12		1.00618e-11	1.07385e-11
20.74	1.02006e-11	9.67214e-12	9.653e-12		1.00571e-11	1.07375e-11
20.76	1.01962e-11	9.66835e-12	9.65328e-12		1.00596e-11	1.07308e-11
20.78	1.01964e-11	9.66664e-12	9.64978e-12		1.00597e-11	1.07441e-11
20.8	1.02061e-11	9.66396e-12	9.6572e-12		1.00582e-11	1.07348e-11
20.82	1.01968e-11	9.66742e-12	9.65341e-12		1.00589e-11	1.07413e-11
20.84	1.01955e-11	9.6674e-12	9.66348e-12		1.00586e-11	1.07451e-11
20.86	1.02006e-11	9.66488e-12	9.66523e-12		1.0055e-11	1.07369e-11
20.88	1.01997e-11	9.66979e-12	9.65974e-12		1.00587e-11	1.07457e-11
20.9	1.0199e-11	9.67145e-12	9.65977e-12		1.00623e-11	1.07461e-11
20.92	1.01949e-11	9.66976e-12	9.66348e-12		1.00623e-11	1.07411e-11
20.94	1.01942e-11	9.6723e-12	9.65655e-12		1.00565e-11	1.07475e-11
20.96	1.02034e-11	9.67647e-12	9.65364e-12		1.00569e-11	1.07427e-11
20.98	1.01931e-11	9.66602e-12	9.66001e-12		1.00644e-11	1.07389e-11
21	1.01986e-11	9.6726e-12	9.65468e-12		1.00583e-11	1.0738e-11
21.02	1.01917e-11	9.66588e-12	9.65486e-12		1.00571e-11	1.07387e-11
21.04	1.01987e-11	9.67152e-12			1.00606e-11	1.0739e-11
21.06	1.02011e-11	9.67316e-12			1.00558e-11	1.07439e-11
21.08	1.0199e-11	9.67329e-12			1.00553e-11	1.07372e-11
21.1	1.01972e-11	9.66115e-12			1.00597e-11	1.07437e-11
21.12	1.01995e-11	9.66936e-12			1.00629e-11	1.07418e-11
21.14	1.01998e-11	9.67142e-12			1.00612e-11	1.07412e-11
21.16	1.01977e-11	9.6704e-12			1.00625e-11	1.07365e-11
21.18	1.01975e-11	9.67147e-12			1.00637e-11	1.07358e-11
21.2	1.02009e-11	9.67622e-12			1.00655e-11	1.07378e-11
21.22	1.01998e-11	9.67554e-12			1.00629e-11	1.07385e-11
21.24	1.01997e-11	9.66642e-12			1.00607e-11	1.07383e-11
21.26	1.02005e-11	9.66883e-12			1.00646e-11	1.07389e-11
21.28	1.02069e-11	9.6605e-12			1.00673e-11	1.07347e-11
21.3	1.02001e-11	9.65616e-12			1.00557e-11	1.07274e-11
21.32	1.01997e-11	9.66049e-12			1.00646e-11	1.07314e-11
21.34	1.02022e-11	9.66838e-12			1.00625e-11	1.07248e-11
21.36	1.01935e-11	9.66643e-12			1.00605e-11	1.07252e-11
21.38	1.01923e-11	9.67312e-12			1.00615e-11	1.07313e-11
21.4	1.02041e-11	9.66037e-12			1.00641e-11	1.07266e-11
21.42	1.01962e-11	9.66398e-12			1.00579e-11	1.07295e-11
21.44	1.01923e-11	9.66098e-12			1.0061e-11	1.07252e-11
21.46	1.02022e-11	9.65826e-12			1.00628e-11	1.07261e-11
21.48	1.01918e-11	9.66316e-12			1.00624e-11	1.0731e-11
21.5	1.01936e-11	9.66916e-12			1.00639e-11	1.07303e-11
21.52	1.01956e-11	9.66011e-12			1.00637e-11	1.073e-11
21.54	1.01971e-11	9.66573e-12			1.00563e-11	1.07271e-11
21.56	1.01995e-11	9.66357e-12			1.00633e-11	1.07289e-11
21.58	1.01964e-11	9.66223e-12			1.0065e-11	1.07258e-11
21.6	1.02018e-11	9.66602e-12			1.00568e-11	1.07326e-11
21.62	1.01994e-11	9.66559e-12			1.00657e-11	1.07245e-11
21.64	1.0196e-11	9.66503e-12			1.00496e-11	1.07318e-11
21.66	1.02029e-11	9.666e-12			1.00646e-11	1.07252e-11
21.68	1.01996e-11	9.65913e-12			1.00591e-11	1.07315e-11
21.7	1.02033e-11	9.66833e-12			1.00604e-11	1.0726e-11
21.72	1.01976e-11	9.66922e-12			1.00527e-11	1.07321e-11
21.74	1.0198e-11	9.66503e-12			1.00578e-11	1.07277e-11
21.76	1.01991e-11	9.6673e-12			1.00564e-11	1.07313e-11
21.78	1.01933e-11	9.67005e-12			1.00634e-11	1.07297e-11
21.8	1.02039e-11	9.66911e-12			1.0057e-11	1.07288e-11
21.82	1.01988e-11	9.66955e-12			1.00629e-11	1.07268e-11
21.84	1.01963e-11	9.67098e-12			1.00572e-11	1.07302e-11
21.86	1.0201e-11	9.67295e-12			1.00615e-11	1.07287e-11
21.88	1.02021e-11	9.66277e-12			1.0062e-11	1.0733e-11
21.9	1.02037e-11	9.6658e-12			1.00575e-11	1.0731e-11
21.92	1.01975e-11	9.67168e-12			1.00638e-11	1.07217e-11
21.94	1.02036e-11	9.67588e-12			1.00611e-11	1.07282e-11
21.96	1.0202e-11	9.67322e-12			1.00636e-11	1.0728e-11
21.98	1.02052e-11	9.6744e-12			1.00608e-11	1.07266e-11
22	1.02054e-11	9.6726e-12			1.00687e-11	1.07277e-11
22.02	1.0203e-11	9.67838e-12			1.0063e-11	1.07308e-11
22.04	1.0203e-11				1.00651e-11
22.06	1.02108e-11				1.00628e-11
22.08	1.02077e-11				1.00656e-11
22.1	1.02081e-11				1.00659e-11
22.12	1.02066e-11				1.00634e-11
22.14	1.02067e-11				1.0071e-11
22.16	1.02105e-11				1.00714e-11
22.18	1.02044e-11				1.0067e-11
22.2	1.02018e-11				1.00573e-11
22.22	1.02092e-11				1.00671e-11
22.24	1.02066e-11				1.00628e-11
22.26	1.02126e-11				1.00612e-11
22.28	1.02015e-11				1.00581e-11
22.3	1.02064e-11				1.00654e-11
22.32	1.02013e-11				1.00631e-11
22.34	1.02079e-11				1.00663e-11
22.36	1.01949e-11				1.00635e-11
22.38	1.02061e-11				1.00649e-11
22.4	1.02074e-11				1.00644e-11
22.42	1.02049e-11				1.00607e-11
22.44	1.02018e-11				1.00588e-11
22.46	1.02069e-11				1.00648e-11
22.48	1.02154e-11				1.0062e-11
22.5	1.02068e-11				1.00691e-11
22.52	1.02001e-11				1.00641e-11
22.54	1.02067e-11				1.00669e-11
22.56	1.0202e-11				1.00598e-11
22.58	1.02009e-11				1.00636e-11
22.6	1.02012e-11				1.00624e-11
22.62	1.02077e-11				1.00669e-11
22.64	1.02111e-11				1.00666e-11
22.66	1.02081e-11				1.0065e-11
22.68	1.02061e-11				1.00597e-11
22.7	1.02037e-11				1.00623e-11
22.72					1.00603e-11
22.74					1.00684e-11
22.76					1.00665e-11
22.78					1.00669e-11
22.8					1.007e-11
22.82					1.00698e-11
22.84					1.00717e-11
22.86					1.00673e-11
22.88					1.00658e-11
22.9					1.00677e-11
22.92					1.00704e-11
22.94					1.0066e-11
22.96					1.00693e-11
22.98					1.00642e-11
23					1.00607e-11
23.02					1.00599e-11
23.04
23.06
23.08
23.1
23.12
23.14
23.16
23.18
23.2
23.22
23.24
23.26
23.28
23.3
23.32
23.34
23.36
23.38
23.4
23.42
23.44
23.46
23.48
23.5
23.52
23.54
23.56
23.58
23.6
23.62
23.64
23.66
23.68
23.7
23.72
23.74
23.76
23.78
23.8
23.82
23.84
23.86
23.88
23.9
23.92
23.94
23.96
23.98
24
24.02
24.04
24.06
24.08
24.1
24.12
24.14
24.16
24.18
24.2
24.22
24.24
24.26
24.28
24.3
24.32
24.34
24.36
24.38
24.4
24.42
24.44
24.46
24.48
24.5
24.52
24.54
24.56
24.58
24.6
24.62
24.64
24.66
24.68
24.7
24.72
24.74
24.76
24.78
24.8
24.82
24.84
24.86
24.88
24.9
24.92
24.94
24.96
24.98
25
25.02
25.04
25.06
25.08
25.1
25.12
25.14
25.16
25.18
25.2
25.22
25.24
25.26
25.28
25.3
25.32
25.34
25.36
25.38
25.4
25.42
25.44
25.46
25.48
25.5
25.52
25.54
25.56
25.58
25.6
25.62
25.64
25.66
25.68
25.7
25.72
25.74
25.76
25.78
25.8
25.82
25.84
25.86
25.88
25.9
25.92
25.94
25.96
25.98
26
26.02
26.04
26.06
26.08
26.1
26.12
26.14
26.16
26.18
26.2
26.22
26.24
26.26
26.28
26.3
26.32
26.34
26.36
26.38
26.4
26.42
26.44
26.46
26.48
26.5
26.52
26.54
26.56
26.58
26.6
26.62
26.64
26.66
26.68
26.7
26.72
26.74
26.76
26.78
26.8
26.82
26.84
26.86
26.88
26.9
26.92
26.94
26.96
26.98
27
27.02
27.04
27.06
27.08
27.1
27.12
27.14
27.16
27.18
27.2
27.22
27.24
27.26
27.28
27.3
27.32
27.34
27.36
27.38
27.4
27.42
27.44
27.46
27.48
27.5
27.52
27.54
27.56
27.58
27.6
27.62
27.64
27.66
27.68
27.7
27.72
27.74
27.76
27.78
27.8
27.82
27.84
27.86
27.88
27.9
27.92
27.94
27.96
27.98
28
28.02
28.04
28.06
28.08
28.1
28.12
28.14
28.16
28.18
28.2
28.22
28.24
28.26
28.28
28.3
28.32
28.34
28.36
28.38
28.4
28.42
28.44
28.46
28.48
28.5
28.52
28.54
28.56
28.58
28.6
28.62
28.64
28.66
28.68
28.7
28.72
28.74
28.76
28.78
28.8
28.82
28.84
28.86
28.88
28.9
28.92
28.94
28.96
28.98
29
29.02
29.04
29.06
29.08
29.1
29.12
29.14
29.16
29.18
29.2
29.22
29.24
29.26
29.28
29.3
29.32
29.34
29.36
29.38
29.4
29.42
29.44
29.46
29.48
29.5
29.52
29.54
29.56
29.58
29.6
29.62
29.64
29.66
29.68
29.7
29.72
29.74
29.76
29.78
29.8
29.82
29.84
29.86
29.88
29.9
29.92
29.94
29.96
29.98
30
30.02
30.04
30.06
30.08
30.1
30.12
30.14
30.16
30.18
30.2
30.22
30.24
30.26
30.28
30.3
30.32
30.34
30.36
30.38
30.4
30.42
30.44
30.46
30.48
30.5
30.52
30.54
30.56
30.58
30.6
30.62
30.64
30.66
30.68
30.7
30.72
30.74
30.76
30.78
30.8
30.82
30.84
30.86
30.88
30.9
30.92
30.94
30.96
30.98
31
31.02
31.04
31.06
31.08
31.1
31.12
31.14
31.16
31.18
31.2
31.22
31.24
31.26
31.28
31.3
31.32
31.34
31.36
31.38
31.4
31.42
31.44
31.46
31.48
31.5
31.52
31.54
31.56
31.58
31.6
31.62
31.64
31.66
31.68
31.7
31.72
31.74
31.76
31.78
31.8
31.82
31.84
31.86
31.88
31.9
31.92
31.94
31.96
31.98
32
32.02
32.04
32.06
32.08
32.1
32.12
32.14
32.16
32.18
32.2
32.22
32.24
32.26
32.28
32.3
32.32
32.34
32.36
32.38
32.4
32.42
32.44
32.46
32.48
32.5
32.52
32.54
32.56
32.58
32.6
32.62
32.64
32.66
32.68
32.7
32.72
32.74
32.76
32.78
32.8
32.82
32.84
32.86
32.88
32.9
32.92
32.94
32.96
32.98
33
33.02
33.04
33.06
33.08
33.1
33.12
33.14
33.16
33.18
33.2
33.22
33.24
33.26
33.28
33.3
33.32
33.34
33.36
33.38
33.4
33.42
33.44
33.46
33.48
33.5
33.52
33.54
33.56
33.58
33.6
33.62
33.64
33.66
33.68
33.7
33.72
33.74
33.76
33.78
33.8
33.82
33.84
33.86
33.88
33.9
33.92
33.94
33.96
33.98
34
34.02
34.04
34.06
34.08
34.1
34.12
34.14
34.16
34.18
34.2
34.22
34.24
34.26
34.28
34.3
34.32
34.34
34.36
34.38
34.4
34.42
34.44
34.46
34.48
34.5
34.52
34.54
34.56
34.58
34.6
34.62
34.64
34.66
34.68
34.7
34.72
34.74
34.76
34.78
34.8
34.82
34.84
34.86
34.88
34.9
34.92
34.94
34.96
34.98
35
35.02
35.04
35.06
35.08
35.1
35.12
35.14
35.16
35.18
35.2
35.22
35.24
35.26
35.28
35.3
35.32
35.34
35.36
35.38
35.4
35.42
35.44
35.46
35.48
35.5
35.52
35.54
35.56
35.58
35.6
35.62
35.64
35.66
35.68
35.7
35.72
35.74
35.76
35.78
35.8
35.82
35.84
35.86
35.88
35.9
35.92
35.94
35.96
35.98
36
36.02
36.04
36.06
36.08
36.1
36.12
36.14
36.16
36.18
36.2
36.22
36.24
36.26
36.28
36.3
36.32
36.34
36.36
36.38
36.4
36.42
36.44
36.46
36.48
36.5
36.52
36.54
36.56
36.58
36.6
36.62
36.64
36.66
36.68
36.7
36.72
36.74
36.76
36.78
36.8
36.82
36.84
36.86
36.88
36.9
36.92
36.94
36.96
36.98
37
37.02
37.04
37.06
37.08
37.1
37.12
37.14
37.16
37.18
37.2
37.22
37.24
37.26
37.28
37.3
37.32
37.34
37.36
37.38
37.4
37.42
37.44
37.46
37.48
37.5
37.52
37.54
37.56
37.58
37.6
37.62
37.64
37.66
37.68
37.7
37.72
37.74
37.76
37.78
37.8
37.82
37.84
37.86
37.88
37.9
37.92
37.94
37.96
37.98
38
38.02
38.04
38.06
38.08
38.1
38.12
38.14
38.16
38.18
38.2
38.22
38.24
38.26
38.28
38.3
38.32
38.34
38.36
38.38
38.4
38.42
38.44
38.46
38.48
38.5
38.52
38.54
38.56
38.58
38.6
38.62
38.64
38.66
38.68
38.7
38.72
38.74
38.76
38.78
38.8
38.82
38.84
38.86
38.88
38.9
38.92
38.94
38.96
38.98
39
39.02
39.04
39.06
39.08
39.1
39.12
39.14
39.16
39.18
39.2
39.22
39.24
39.26
39.28
39.3
39.32
39.34
39.36
39.38
39.4
39.42
39.44
39.46
39.48
39.5
39.52
39.54
39.56
39.58
39.6
39.62
39.64
39.66
39.68
39.7
39.72
39.74
39.76
39.78
39.8
39.82
39.84
39.86
39.88
39.9
39.92
39.94
39.96
[truncated: 5,002 more rows]

## Sheet: 16618005-031.abf
	Cm(F)
Time(ms)	100 uM 5-HT	30 uM 5-HT	10 uM 5-HT	3 uM 5-HT	1 uM 5-HT	0.3 uM 5-HT	0.1 uM 5-HT
0.02	1.50999e-11	1.49618e-11	1.49029e-11	1.33169e-11	1.32806e-11	1.32196e-11	1.31728e-11
0.04	1.50984e-11	1.49649e-11	1.49053e-11	1.3323e-11	1.32838e-11	1.32213e-11	1.31671e-11
0.06	1.51022e-11	1.49632e-11	1.4903e-11	1.33221e-11	1.3279e-11	1.32256e-11	1.31659e-11
0.08	1.51032e-11	1.49661e-11	1.49026e-11	1.33167e-11	1.32815e-11	1.3224e-11	1.31674e-11
0.1	1.50997e-11	1.49677e-11	1.49033e-11	1.33215e-11	1.32801e-11	1.3221e-11	1.31656e-11
0.12	1.51023e-11	1.49613e-11	1.49021e-11	1.33197e-11	1.32831e-11	1.32292e-11	1.31712e-11
0.14	1.50973e-11	1.49681e-11	1.49048e-11	1.33201e-11	1.32782e-11	1.32216e-11	1.31668e-11
0.16	1.51048e-11	1.49655e-11	1.49019e-11	1.33217e-11	1.32865e-11	1.322e-11	1.31699e-11
0.18	1.5102e-11	1.49627e-11	1.49022e-11	1.33234e-11	1.32816e-11	1.32191e-11	1.31736e-11
0.2	1.51053e-11	1.49625e-11	1.49028e-11	1.33201e-11	1.32835e-11	1.32243e-11	1.31648e-11
0.22	1.51033e-11	1.49597e-11	1.49068e-11	1.33217e-11	1.32789e-11	1.3222e-11	1.31721e-11
0.24	1.51003e-11	1.49601e-11	1.49059e-11	1.33181e-11	1.32815e-11	1.32268e-11	1.31673e-11
0.26	1.51024e-11	1.49619e-11	1.49056e-11	1.33187e-11	1.32818e-11	1.32245e-11	1.31702e-11
0.28	1.50986e-11	1.49707e-11	1.49064e-11	1.33206e-11	1.32832e-11	1.32225e-11	1.31655e-11
0.3	1.51033e-11	1.49672e-11	1.49023e-11	1.33188e-11	1.32848e-11	1.3225e-11	1.31677e-11
0.32	1.50988e-11	1.49661e-11	1.49084e-11	1.33194e-11	1.32802e-11	1.32218e-11	1.31726e-11
0.34	1.5096e-11	1.49636e-11	1.49047e-11	1.33156e-11	1.32821e-11	1.32257e-11	1.31701e-11
0.36	1.5103e-11	1.49699e-11	1.49064e-11	1.33215e-11	1.32807e-11	1.32292e-11	1.31697e-11
0.38	1.50986e-11	1.49643e-11	1.49088e-11	1.33195e-11	1.32821e-11	1.32286e-11	1.31684e-11
0.4	1.50989e-11	1.49663e-11	1.48999e-11	1.3318e-11	1.32857e-11	1.32222e-11	1.31702e-11
0.42	1.51042e-11	1.4964e-11	1.49065e-11	1.33145e-11	1.32805e-11	1.32289e-11	1.31742e-11
0.44	1.50959e-11	1.49697e-11	1.49066e-11	1.33183e-11	1.32802e-11	1.32282e-11	1.31728e-11
0.46	1.51012e-11	1.49642e-11	1.49047e-11	1.33213e-11	1.3283e-11	1.32241e-11	1.31695e-11
0.48	1.51015e-11	1.49713e-11	1.49013e-11	1.33168e-11	1.32797e-11	1.32268e-11	1.3174e-11
0.5	1.51038e-11	1.49652e-11	1.49037e-11	1.33209e-11	1.32822e-11	1.32267e-11	1.31725e-11
0.52	1.50986e-11	1.49658e-11	1.49063e-11	1.33196e-11	1.32844e-11	1.32244e-11	1.31693e-11
0.54	1.50962e-11	1.49655e-11	1.49083e-11	1.33238e-11	1.32906e-11	1.32257e-11	1.31666e-11
0.56	1.50994e-11	1.49691e-11	1.49114e-11	1.33182e-11	1.3286e-11	1.32242e-11	1.31696e-11
0.58	1.51016e-11	1.49679e-11	1.49076e-11	1.33207e-11	1.32807e-11	1.32228e-11	1.31677e-11
0.6	1.51012e-11	1.49679e-11	1.49093e-11	1.33221e-11	1.32857e-11	1.32284e-11	1.31685e-11
0.62	1.51003e-11	1.49694e-11	1.49043e-11	1.33193e-11	1.32822e-11	1.32259e-11	1.3168e-11
0.64	1.50946e-11	1.4969e-11	1.49048e-11	1.33194e-11	1.32774e-11	1.32293e-11	1.31679e-11
0.66	1.50989e-11	1.49682e-11	1.49073e-11	1.33193e-11	1.32826e-11	1.32261e-11	1.31746e-11
0.68	1.50983e-11	1.49683e-11	1.49073e-11	1.33208e-11	1.32828e-11	1.32257e-11	1.31711e-11
0.7	1.51021e-11	1.4972e-11	1.49043e-11	1.33215e-11	1.32837e-11	1.32223e-11	1.31699e-11
0.72	1.51017e-11	1.49679e-11	1.49063e-11	1.33141e-11	1.32861e-11	1.3225e-11	1.3174e-11
0.74	1.50996e-11	1.4971e-11	1.4905e-11	1.33216e-11	1.32858e-11	1.32278e-11	1.31723e-11
0.76	1.51031e-11	1.49741e-11	1.49093e-11	1.33236e-11	1.32818e-11	1.32239e-11	1.31732e-11
0.78	1.51005e-11	1.49707e-11	1.49088e-11	1.33246e-11	1.32826e-11	1.32248e-11	1.31676e-11
0.8	1.50984e-11	1.4972e-11	1.49068e-11	1.33194e-11	1.32861e-11	1.32225e-11	1.3169e-11
0.82	1.50997e-11	1.49729e-11	1.49052e-11	1.33215e-11	1.32844e-11	1.32281e-11	1.31662e-11
0.84	1.51028e-11	1.49724e-11	1.49025e-11	1.33223e-11	1.32832e-11	1.3224e-11	1.31693e-11
0.86	1.50986e-11	1.49741e-11	1.49091e-11	1.33284e-11	1.3284e-11	1.3223e-11	1.31726e-11
0.88	1.51023e-11	1.49769e-11	1.49064e-11	1.33206e-11	1.32838e-11	1.32273e-11	1.31733e-11
0.9	1.51013e-11	1.49772e-11	1.49029e-11	1.33226e-11	1.32803e-11	1.32245e-11	1.3171e-11
0.92	1.51006e-11	1.49786e-11	1.4903e-11	1.33239e-11	1.32801e-11	1.32273e-11	1.3176e-11
0.94	1.51045e-11	1.4975e-11	1.49028e-11	1.33154e-11	1.32888e-11	1.32275e-11	1.31703e-11
0.96	1.5102e-11	1.49719e-11	1.49038e-11	1.33284e-11	1.32834e-11	1.32204e-11	1.31643e-11
0.98	1.51045e-11	1.49702e-11	1.4907e-11	1.33237e-11	1.32827e-11	1.32261e-11	1.31686e-11
1	1.51009e-11	1.49777e-11	1.49034e-11	1.33191e-11	1.32829e-11	1.32284e-11	1.31725e-11
1.02	1.51029e-11	1.49795e-11	1.49041e-11	1.33195e-11	1.32798e-11	1.32267e-11	1.31703e-11
1.04	1.51048e-11	1.49758e-11	1.49061e-11	1.33194e-11	1.32813e-11	1.32266e-11	1.31683e-11
1.06	1.51077e-11	1.49769e-11	1.49036e-11	1.33203e-11	1.3284e-11	1.32286e-11	1.31701e-11
1.08	1.51084e-11	1.49698e-11	1.49033e-11	1.33187e-11	1.32834e-11	1.32242e-11	1.31684e-11
1.1	1.51009e-11	1.49732e-11	1.49083e-11	1.3325e-11	1.32802e-11	1.32257e-11	1.31727e-11
1.12	1.51051e-11	1.49767e-11	1.49079e-11	1.33213e-11	1.32852e-11	1.32261e-11	1.31761e-11
1.14	1.51069e-11	1.49744e-11	1.49004e-11	1.33244e-11	1.3279e-11	1.32271e-11	1.31725e-11
1.16	1.51029e-11	1.49777e-11	1.49076e-11	1.33199e-11	1.32814e-11	1.32263e-11	1.31684e-11
1.18	1.51057e-11	1.49793e-11	1.49056e-11	1.33228e-11	1.32834e-11	1.32259e-11	1.31709e-11
1.2	1.51084e-11	1.4978e-11	1.49036e-11	1.33225e-11	1.32837e-11	1.32258e-11	1.31703e-11
1.22	1.51039e-11	1.49713e-11	1.49019e-11	1.33174e-11	1.32813e-11	1.32307e-11	1.31731e-11
1.24	1.51065e-11	1.49766e-11	1.49036e-11	1.33229e-11	1.32797e-11	1.32313e-11	1.31716e-11
1.26	1.5102e-11	1.49701e-11	1.49054e-11	1.33184e-11	1.32787e-11	1.32317e-11	1.31705e-11
1.28	1.5102e-11	1.49759e-11	1.49013e-11	1.33212e-11	1.32817e-11	1.32288e-11	1.31684e-11
1.3	1.51067e-11	1.49774e-11	1.49082e-11	1.33222e-11	1.328e-11	1.32272e-11	1.31711e-11
1.32	1.51094e-11	1.49802e-11	1.4902e-11	1.33196e-11	1.32831e-11	1.32292e-11	1.31704e-11
1.34	1.51029e-11	1.49787e-11	1.49012e-11	1.33213e-11	1.32873e-11	1.32285e-11	1.31731e-11
1.36	1.51075e-11	1.49755e-11	1.49036e-11	1.33218e-11	1.32823e-11	1.32322e-11	1.31746e-11
1.38	1.51076e-11	1.49859e-11	1.49001e-11	1.332e-11	1.32832e-11	1.32285e-11	1.31826e-11
1.4	1.51051e-11	1.49841e-11	1.49059e-11	1.33191e-11	1.32819e-11	1.32308e-11	1.31698e-11
1.42	1.51001e-11	1.49846e-11	1.49038e-11	1.33252e-11	1.32864e-11	1.32336e-11	1.31773e-11
1.44	1.51076e-11	1.49816e-11	1.49087e-11	1.3326e-11	1.32776e-11	1.32265e-11	1.31689e-11
1.46	1.51092e-11	1.49777e-11	1.49071e-11	1.33228e-11	1.32856e-11	1.32304e-11	1.31692e-11
1.48	1.51099e-11	1.4977e-11	1.4906e-11	1.33195e-11	1.32839e-11	1.32253e-11	1.31688e-11
1.5	1.51038e-11	1.49805e-11	1.49081e-11	1.33194e-11	1.32836e-11	1.32222e-11	1.31706e-11
1.52	1.51069e-11	1.49764e-11	1.49057e-11	1.33182e-11	1.32818e-11	1.32308e-11	1.31747e-11
1.54	1.5109e-11	1.49856e-11	1.49097e-11	1.33175e-11	1.32836e-11	1.32321e-11	1.3171e-11
1.56	1.51052e-11	1.49823e-11	1.49108e-11	1.33219e-11	1.32813e-11	1.32262e-11	1.31664e-11
1.58	1.51056e-11	1.49795e-11	1.49141e-11	1.33197e-11	1.32856e-11	1.32258e-11	1.3168e-11
1.6	1.51085e-11	1.49794e-11	1.49092e-11	1.33231e-11	1.3283e-11	1.32305e-11	1.3171e-11
1.62	1.51096e-11	1.4976e-11	1.49076e-11	1.33217e-11	1.32855e-11	1.32269e-11	1.31739e-11
1.64	1.51104e-11	1.49841e-11	1.49088e-11	1.3319e-11	1.32812e-11	1.32245e-11	1.3167e-11
1.66	1.51111e-11	1.49805e-11	1.49103e-11	1.33194e-11	1.32853e-11	1.32273e-11	1.31762e-11
1.68	1.51107e-11	1.49823e-11	1.49054e-11	1.33197e-11	1.32829e-11	1.32264e-11	1.31769e-11
1.7	1.51117e-11	1.49794e-11	1.4908e-11	1.3322e-11	1.32853e-11	1.32281e-11	1.31739e-11
1.72	1.51113e-11	1.49767e-11	1.49116e-11	1.33227e-11	1.32813e-11	1.32255e-11	1.31729e-11
1.74	1.51086e-11	1.49794e-11	1.49091e-11	1.33256e-11	1.3287e-11	1.32251e-11	1.31734e-11
1.76	1.51102e-11	1.49841e-11	1.49124e-11	1.33252e-11	1.32836e-11	1.32308e-11	1.31729e-11
1.78	1.51105e-11	1.49762e-11	1.49065e-11	1.33235e-11	1.32853e-11	1.32259e-11	1.31713e-11
1.8	1.51083e-11	1.49769e-11	1.49079e-11	1.3324e-11	1.32834e-11	1.32262e-11	1.31746e-11
1.82	1.50993e-11	1.49778e-11	1.49124e-11	1.33238e-11	1.32861e-11	1.32307e-11	1.31712e-11
1.84	1.51047e-11	1.49769e-11	1.4912e-11	1.33261e-11	1.32856e-11	1.32259e-11	1.31705e-11
1.86	1.51076e-11	1.49835e-11	1.49105e-11	1.33235e-11	1.32841e-11	1.3223e-11	1.31733e-11
1.88	1.5107e-11	1.49753e-11	1.49143e-11	1.33224e-11	1.32841e-11	1.32228e-11	1.31716e-11
1.9	1.51026e-11	1.49751e-11	1.49084e-11	1.33189e-11	1.32823e-11	1.32301e-11	1.31742e-11
1.92	1.51126e-11	1.49772e-11	1.491e-11	1.33239e-11	1.32823e-11	1.32234e-11	1.31718e-11
1.94	1.51076e-11	1.49754e-11	1.49023e-11	1.33236e-11	1.32858e-11	1.32254e-11	1.31753e-11
1.96	1.51056e-11	1.49752e-11	1.49099e-11	1.33268e-11	1.3279e-11	1.32275e-11	1.31756e-11
1.98	1.51053e-11	1.49714e-11	1.4909e-11	1.33251e-11	1.32841e-11	1.32246e-11	1.31778e-11
2	1.51048e-11	1.49724e-11	1.49109e-11	1.33218e-11	1.32786e-11	1.32244e-11	1.31721e-11
2.02	1.51036e-11	1.49744e-11	1.49107e-11	1.33183e-11	1.32834e-11	1.32231e-11	1.31758e-11
2.04	1.51024e-11	1.4974e-11	1.49062e-11	1.33198e-11	1.32829e-11	1.32261e-11	1.31747e-11
2.06	1.5104e-11	1.49753e-11	1.49126e-11	1.33226e-11	1.32864e-11	1.32271e-11	1.31728e-11
2.08	1.51049e-11	1.49754e-11	1.49065e-11	1.33228e-11	1.32855e-11	1.3227e-11	1.31796e-11
2.1	1.51048e-11	1.49728e-11	1.49104e-11	1.33222e-11	1.32829e-11	1.32237e-11	1.3175e-11
2.12	1.51062e-11	1.49748e-11	1.49117e-11	1.332e-11	1.32842e-11	1.32309e-11	1.31749e-11
2.14	1.51108e-11	1.49734e-11	1.49118e-11	1.33216e-11	1.32859e-11	1.32304e-11	1.31795e-11
2.16	1.51078e-11	1.4974e-11	1.49103e-11	1.33246e-11	1.32851e-11	1.32255e-11	1.31707e-11
2.18	1.51073e-11	1.49698e-11	1.49144e-11	1.33257e-11	1.32842e-11	1.32249e-11	1.31721e-11
2.2	1.51107e-11	1.49697e-11	1.49125e-11	1.33262e-11	1.32843e-11	1.32245e-11	1.31748e-11
2.22	1.5108e-11	1.49668e-11	1.49121e-11	1.33246e-11	1.3285e-11	1.32261e-11	1.31696e-11
2.24	1.51037e-11	1.49712e-11	1.49095e-11	1.33221e-11	1.32848e-11	1.32242e-11	1.31699e-11
2.26	1.51086e-11	1.497e-11	1.49107e-11	1.3322e-11	1.32829e-11	1.32258e-11	1.31695e-11
2.28	1.51075e-11	1.4975e-11	1.49088e-11	1.33248e-11	1.32822e-11	1.32227e-11	1.31657e-11
2.3	1.51085e-11	1.49756e-11	1.49157e-11	1.33229e-11	1.3285e-11	1.32271e-11	1.31733e-11
2.32	1.51081e-11	1.49735e-11	1.49108e-11	1.3323e-11	1.32827e-11	1.32264e-11	1.31712e-11
2.34	1.51088e-11	1.49745e-11	1.49099e-11	1.33214e-11	1.3282e-11	1.3226e-11	1.31715e-11
2.36	1.51072e-11	1.49749e-11	1.49098e-11	1.33267e-11	1.3283e-11	1.32284e-11	1.31741e-11
2.38	1.5108e-11	1.49665e-11	1.49046e-11	1.33296e-11	1.32868e-11	1.32284e-11	1.31776e-11
2.4	1.51037e-11	1.49669e-11	1.49054e-11	1.33238e-11	1.32871e-11	1.32286e-11	1.31696e-11
2.42	1.51061e-11	1.49693e-11	1.49051e-11	1.33198e-11	1.32849e-11	1.32298e-11	1.31729e-11
2.44	1.51093e-11	1.49739e-11	1.49093e-11	1.33259e-11	1.32865e-11	1.32306e-11	1.31733e-11
2.46	1.51089e-11	1.49725e-11	1.49096e-11	1.33254e-11	1.32828e-11	1.32363e-11	1.3174e-11
2.48	1.51098e-11	1.49756e-11	1.49077e-11	1.33231e-11	1.32847e-11	1.3229e-11	1.31724e-11
2.5	1.5107e-11	1.49789e-11	1.49083e-11	1.33221e-11	1.32861e-11	1.32299e-11	1.31741e-11
2.52	1.51111e-11	1.49732e-11	1.4909e-11	1.33189e-11	1.32878e-11	1.32317e-11	1.31705e-11
2.54	1.51083e-11	1.49714e-11	1.49074e-11	1.33219e-11	1.32868e-11	1.32229e-11	1.31735e-11
2.56	1.51052e-11	1.49755e-11	1.49102e-11	1.33229e-11	1.32843e-11	1.32297e-11	1.31764e-11
2.58	1.51071e-11	1.49702e-11	1.49076e-11	1.33237e-11	1.32844e-11	1.32274e-11	1.31737e-11
2.6	1.51058e-11	1.49752e-11	1.4908e-11	1.33208e-11	1.32854e-11	1.32276e-11	1.31712e-11
2.62	1.51073e-11	1.49761e-11	1.4905e-11	1.33238e-11	1.32864e-11	1.32279e-11	1.31712e-11
2.64	1.51096e-11	1.49763e-11	1.49095e-11	1.33206e-11	1.3282e-11	1.32299e-11	1.31763e-11
2.66	1.51063e-11	1.49759e-11	1.49087e-11	1.33181e-11	1.32798e-11	1.3228e-11	1.31746e-11
2.68	1.51013e-11	1.49705e-11	1.49068e-11	1.33193e-11	1.32845e-11	1.32382e-11	1.31657e-11
2.7	1.50989e-11	1.49736e-11	1.49078e-11	1.33207e-11	1.32873e-11	1.32308e-11	1.31748e-11
2.72	1.51055e-11	1.49707e-11	1.4907e-11	1.33219e-11	1.32809e-11	1.32336e-11	1.31704e-11
2.74	1.51053e-11	1.49693e-11	1.4907e-11	1.33223e-11	1.32823e-11	1.32348e-11	1.31756e-11
2.76	1.51035e-11	1.49657e-11	1.49107e-11	1.33172e-11	1.32855e-11	1.32327e-11	1.31745e-11
2.78	1.50981e-11	1.49714e-11	1.49099e-11	1.33197e-11	1.32801e-11	1.32331e-11	1.31707e-11
2.8	1.51024e-11	1.49763e-11	1.49085e-11	1.33195e-11	1.32816e-11	1.32297e-11	1.31724e-11
2.82	1.51088e-11	1.4976e-11	1.49082e-11	1.33255e-11	1.32808e-11	1.32311e-11	1.31767e-11
2.84	1.51028e-11	1.49718e-11	1.49061e-11	1.33216e-11	1.32789e-11	1.32342e-11	1.31743e-11
2.86	1.51046e-11	1.49732e-11	1.49109e-11	1.33222e-11	1.32836e-11	1.32333e-11	1.31721e-11
2.88	1.51058e-11	1.49705e-11	1.49096e-11	1.33226e-11	1.32786e-11	1.32329e-11	1.31677e-11
2.9	1.51047e-11	1.4978e-11	1.491e-11	1.33225e-11	1.32841e-11	1.32313e-11	1.31776e-11
2.92	1.51036e-11	1.49699e-11	1.49108e-11	1.33256e-11	1.3287e-11	1.32305e-11	1.31699e-11
2.94	1.51059e-11	1.49732e-11	1.49117e-11	1.3321e-11	1.32822e-11	1.32289e-11	1.31767e-11
2.96	1.51062e-11	1.49691e-11	1.49063e-11	1.33278e-11	1.32836e-11	1.3232e-11	1.31696e-11
2.98	1.51044e-11	1.49728e-11	1.49091e-11	1.33275e-11	1.32862e-11	1.32341e-11	1.31698e-11
3	1.51059e-11	1.49806e-11	1.49092e-11	1.33182e-11	1.32835e-11	1.32352e-11	1.31727e-11
3.02	1.511e-11	1.49748e-11	1.49044e-11	1.33215e-11	1.32791e-11	1.32345e-11	1.31741e-11
3.04	1.51061e-11	1.49754e-11	1.49098e-11	1.33232e-11	1.32845e-11	1.32279e-11	1.31746e-11
3.06	1.51055e-11	1.49783e-11	1.49117e-11	1.33213e-11	1.32865e-11	1.32304e-11	1.31689e-11
3.08	1.51112e-11	1.49759e-11	1.49084e-11	1.33274e-11	1.32838e-11	1.32342e-11	1.31732e-11
3.1	1.511e-11	1.49732e-11	1.49116e-11	1.3328e-11	1.32849e-11	1.32291e-11	1.31748e-11
3.12	1.51055e-11	1.49782e-11	1.49104e-11	1.33285e-11	1.32868e-11	1.32336e-11	1.31746e-11
3.14	1.51067e-11	1.49757e-11	1.49092e-11	1.33229e-11	1.32854e-11	1.32306e-11	1.3174e-11
3.16	1.51053e-11	1.49818e-11	1.49064e-11	1.33233e-11	1.32806e-11	1.32302e-11	1.31799e-11
3.18	1.51054e-11	1.49776e-11	1.49073e-11	1.33192e-11	1.32852e-11	1.32359e-11	1.31776e-11
3.2	1.51096e-11	1.49807e-11	1.49119e-11	1.33226e-11	1.32819e-11	1.3231e-11	1.31729e-11
3.22	1.51022e-11	1.49765e-11	1.49091e-11	1.33214e-11	1.32881e-11	1.32339e-11	1.31715e-11
3.24	1.5107e-11	1.49757e-11	1.49099e-11	1.33265e-11	1.32838e-11	1.32286e-11	1.31655e-11
3.26	1.51057e-11	1.49839e-11	1.49135e-11	1.33219e-11	1.32823e-11	1.32306e-11	1.31725e-11
3.28	1.51058e-11	1.49785e-11	1.49088e-11	1.3323e-11	1.32809e-11	1.32309e-11	1.31741e-11
3.3	1.5105e-11	1.49807e-11	1.49077e-11	1.33218e-11	1.32856e-11	1.32309e-11	1.31774e-11
3.32	1.51066e-11	1.49814e-11	1.49111e-11	1.33234e-11	1.32852e-11	1.32282e-11	1.31766e-11
3.34	1.51118e-11	1.49784e-11	1.491e-11	1.33234e-11	1.32843e-11	1.32324e-11	1.3174e-11
3.36	1.51079e-11	1.4981e-11	1.49097e-11	1.33276e-11	1.32853e-11	1.32336e-11	1.31727e-11
3.38	1.51082e-11	1.49804e-11	1.49103e-11	1.33222e-11	1.32824e-11	1.32333e-11	1.31692e-11
3.4	1.51073e-11	1.49814e-11	1.4908e-11	1.33285e-11	1.32917e-11	1.32291e-11	1.31738e-11
3.42	1.51134e-11	1.49865e-11	1.49078e-11	1.33242e-11	1.32856e-11	1.32322e-11	1.31743e-11
3.44	1.51117e-11	1.49802e-11	1.49096e-11	1.33262e-11	1.32847e-11	1.3231e-11	1.31736e-11
3.46	1.51107e-11	1.4976e-11	1.49116e-11	1.33244e-11	1.32879e-11	1.32257e-11	1.31801e-11
3.48	1.51139e-11	1.49736e-11	1.49104e-11	1.3327e-11	1.32844e-11	1.32269e-11	1.31781e-11
3.5	1.51083e-11	1.49804e-11	1.49099e-11	1.33257e-11	1.32825e-11	1.32333e-11	1.31729e-11
3.52	1.51098e-11	1.49754e-11	1.49109e-11	1.33224e-11	1.32852e-11	1.32331e-11	1.31812e-11
3.54	1.51136e-11	1.49742e-11	1.49084e-11	1.33272e-11	1.32873e-11	1.32313e-11	1.31739e-11
3.56	1.51119e-11	1.49765e-11	1.49081e-11	1.33268e-11	1.32902e-11	1.32288e-11	1.31696e-11
3.58	1.51136e-11	1.49768e-11	1.49084e-11	1.33243e-11	1.32856e-11	1.3233e-11	1.31765e-11
3.6	1.51133e-11	1.49767e-11	1.49105e-11	1.33234e-11	1.3287e-11	1.32329e-11	1.3172e-11
3.62	1.51179e-11	1.49761e-11	1.49104e-11	1.33226e-11	1.32845e-11	1.32326e-11	1.31773e-11
3.64	1.51154e-11	1.49728e-11	1.49099e-11	1.33242e-11	1.32834e-11	1.32333e-11	1.3173e-11
3.66	1.51165e-11	1.49737e-11	1.49089e-11	1.33271e-11	1.32872e-11	1.32352e-11	1.31722e-11
3.68	1.51174e-11	1.49784e-11	1.49105e-11	1.33224e-11	1.32858e-11	1.32322e-11	1.31716e-11
3.7	1.51163e-11	1.4978e-11	1.49079e-11	1.33281e-11	1.32885e-11	1.32294e-11	1.31748e-11
3.72	1.51161e-11	1.49758e-11	1.49081e-11	1.33203e-11	1.32891e-11	1.32345e-11	1.31721e-11
3.74	1.51121e-11	1.49785e-11	1.49095e-11	1.33242e-11	1.32875e-11	1.32303e-11	1.31757e-11
3.76	1.51127e-11	1.49796e-11	1.49093e-11	1.33232e-11	1.32803e-11	1.32317e-11	1.3176e-11
3.78	1.51152e-11	1.4977e-11	1.49077e-11	1.33287e-11	1.32827e-11	1.32329e-11	1.31774e-11
3.8	1.51104e-11	1.49769e-11	1.49041e-11	1.3323e-11	1.32873e-11	1.32335e-11	1.31732e-11
3.82	1.51147e-11	1.49734e-11	1.49085e-11	1.33276e-11	1.32857e-11	1.32352e-11	1.3174e-11
3.84	1.51122e-11	1.49776e-11	1.49075e-11	1.33214e-11	1.32836e-11	1.32291e-11	1.31767e-11
3.86	1.51127e-11	1.49733e-11	1.49049e-11	1.3325e-11	1.32853e-11	1.32334e-11	1.3172e-11
3.88	1.51154e-11	1.49741e-11	1.49088e-11	1.33275e-11	1.3285e-11	1.32348e-11	1.31788e-11
3.9	1.51141e-11	1.4974e-11	1.4912e-11	1.33272e-11	1.32884e-11	1.32333e-11	1.3176e-11
3.92	1.51147e-11	1.4976e-11	1.49133e-11	1.33258e-11	1.32823e-11	1.32306e-11	1.31821e-11
3.94	1.5118e-11	1.49703e-11	1.49092e-11	1.33262e-11	1.32863e-11	1.32352e-11	1.3179e-11
3.96	1.51136e-11	1.49707e-11	1.49052e-11	1.33218e-11	1.32901e-11	1.32308e-11	1.31751e-11
3.98	1.51141e-11	1.49731e-11	1.49116e-11	1.3325e-11	1.3285e-11	1.32309e-11	1.31739e-11
4	1.512e-11	1.49721e-11	1.49114e-11	1.3322e-11	1.32888e-11	1.32339e-11	1.31781e-11
4.02	1.51168e-11	1.49732e-11	1.49107e-11	1.33257e-11	1.32858e-11	1.32362e-11	1.31784e-11
4.04	1.51161e-11	1.49752e-11	1.49066e-11	1.33239e-11	1.32851e-11	1.32375e-11	1.31792e-11
4.06	1.51181e-11	1.4974e-11	1.49071e-11	1.33262e-11	1.32887e-11	1.32365e-11	1.31795e-11
4.08	1.51217e-11	1.49724e-11	1.49094e-11	1.33286e-11	1.32842e-11	1.32389e-11	1.31759e-11
4.1	1.51167e-11	1.4973e-11	1.49112e-11	1.33281e-11	1.32872e-11	1.32344e-11	1.31739e-11
4.12	1.51152e-11	1.49752e-11	1.49091e-11	1.33263e-11	1.32869e-11	1.32345e-11	1.31792e-11
4.14	1.51174e-11	1.49749e-11	1.49051e-11	1.33306e-11	1.32857e-11	1.32367e-11	1.31741e-11
4.16	1.51148e-11	1.4975e-11	1.49048e-11	1.33239e-11	1.32868e-11	1.32351e-11	1.31773e-11
4.18	1.5116e-11	1.49719e-11	1.49082e-11	1.33257e-11	1.32886e-11	1.32326e-11	1.31799e-11
4.2	1.51169e-11	1.49711e-11	1.4909e-11	1.33299e-11	1.32853e-11	1.32299e-11	1.31734e-11
4.22	1.51106e-11	1.49773e-11	1.49061e-11	1.33246e-11	1.3287e-11	1.32324e-11	1.31713e-11
4.24	1.51145e-11	1.4982e-11	1.49064e-11	1.3322e-11	1.32847e-11	1.32345e-11	1.31708e-11
4.26	1.51166e-11	1.49769e-11	1.4904e-11	1.33221e-11	1.32834e-11	1.32344e-11	1.31698e-11
4.28	1.51138e-11	1.49769e-11	1.49099e-11	1.33225e-11	1.3283e-11	1.32367e-11	1.31762e-11
4.3	1.51165e-11	1.49825e-11	1.49084e-11	1.33273e-11	1.32852e-11	1.32339e-11	1.31733e-11
4.32	1.51145e-11	1.49816e-11	1.49098e-11	1.33282e-11	1.32889e-11	1.3235e-11	1.31736e-11
4.34	1.51155e-11	1.49771e-11	1.49086e-11	1.33237e-11	1.32888e-11	1.3241e-11	1.31755e-11
4.36	1.51112e-11	1.49768e-11	1.4908e-11	1.33245e-11	1.32907e-11	1.32347e-11	1.31727e-11
4.38	1.51138e-11	1.49776e-11	1.49113e-11	1.33242e-11	1.32862e-11	1.32393e-11	1.31772e-11
4.4	1.51129e-11	1.49825e-11	1.49084e-11	1.33259e-11	1.32835e-11	1.32318e-11	1.31771e-11
4.42	1.51183e-11	1.49747e-11	1.49088e-11	1.33301e-11	1.32883e-11	1.32349e-11	1.31763e-11
4.44	1.51188e-11	1.49786e-11	1.49089e-11	1.33244e-11	1.32861e-11	1.32316e-11	1.3177e-11
4.46	1.5117e-11	1.4976e-11	1.49102e-11	1.33219e-11	1.32831e-11	1.32332e-11	1.3179e-11
4.48	1.51187e-11	1.49764e-11	1.49086e-11	1.33233e-11	1.32916e-11	1.3228e-11	1.31786e-11
4.5	1.51174e-11	1.49789e-11	1.49088e-11	1.33204e-11	1.32898e-11	1.32339e-11	1.31751e-11
4.52	1.51181e-11	1.49809e-11	1.49073e-11	1.33273e-11	1.32844e-11	1.32331e-11	1.31783e-11
4.54	1.51161e-11	1.4983e-11	1.49069e-11	1.33292e-11	1.32835e-11	1.32369e-11	1.31786e-11
4.56	1.51177e-11	1.49799e-11	1.49074e-11	1.33256e-11	1.3288e-11	1.32317e-11	1.31757e-11
4.58	1.51149e-11	1.49833e-11	1.49092e-11	1.33267e-11	1.32854e-11	1.32325e-11	1.31764e-11
4.6	1.51185e-11	1.49795e-11	1.49107e-11	1.33208e-11	1.32837e-11	1.32397e-11	1.31774e-11
4.62	1.51237e-11	1.49776e-11	1.49105e-11	1.3324e-11	1.32878e-11	1.32341e-11	1.31753e-11
4.64	1.51227e-11	1.49798e-11	1.4907e-11	1.33257e-11	1.32833e-11	1.32325e-11	1.31799e-11
4.66	1.51222e-11	1.49792e-11	1.49086e-11	1.3329e-11	1.32808e-11	1.32298e-11	1.31787e-11
4.68	1.51224e-11	1.4985e-11	1.49102e-11	1.33241e-11	1.32843e-11	1.3233e-11	1.31735e-11
4.7	1.51224e-11	1.49828e-11	1.49112e-11	1.33291e-11	1.32836e-11	1.32329e-11	1.31759e-11
4.72	1.5123e-11	1.4986e-11	1.49082e-11	1.33282e-11	1.32843e-11	1.32344e-11	1.31778e-11
4.74	1.51204e-11	1.49782e-11	1.49133e-11	1.33243e-11	1.32825e-11	1.3236e-11	1.31721e-11
4.76	1.51251e-11	1.49803e-11	1.49086e-11	1.33278e-11	1.32873e-11	1.32344e-11	1.31719e-11
4.78	1.51263e-11	1.49829e-11	1.49106e-11	1.33212e-11	1.32857e-11	1.3234e-11	1.31754e-11
4.8	1.5121e-11	1.49782e-11	1.49063e-11	1.33255e-11	1.32822e-11	1.32403e-11	1.3174e-11
4.82	1.51204e-11	1.49812e-11	1.49146e-11	1.33265e-11	1.32889e-11	1.32343e-11	1.31823e-11
4.84	1.51239e-11	1.49827e-11	1.49114e-11	1.33265e-11	1.3286e-11	1.32355e-11	1.31802e-11
4.86	1.51251e-11	1.49868e-11	1.49108e-11	1.33287e-11	1.3283e-11	1.32348e-11	1.31785e-11
4.88	1.51224e-11	1.4987e-11	1.4912e-11	1.33251e-11	1.32831e-11	1.32345e-11	1.31763e-11
4.9	1.51221e-11	1.49835e-11	1.49141e-11	1.33191e-11	1.32839e-11	1.3233e-11	1.31779e-11
4.92	1.51238e-11	1.49842e-11	1.49122e-11	1.33288e-11	1.32828e-11	1.32335e-11	1.31741e-11
4.94	1.51279e-11	1.4982e-11	1.49104e-11	1.33274e-11	1.3286e-11	1.32379e-11	1.31761e-11
4.96	1.51226e-11	1.49826e-11	1.49118e-11	1.33253e-11	1.32839e-11	1.32317e-11	1.31811e-11
4.98	1.51248e-11	1.49859e-11	1.49124e-11	1.33249e-11	1.32887e-11	1.32345e-11	1.31755e-11
5	1.51223e-11	1.49893e-11	1.49118e-11	1.33244e-11	1.32802e-11	1.32338e-11	1.3173e-11
5.02	1.51197e-11	1.49873e-11	1.49105e-11	1.33308e-11	1.32771e-11	1.32316e-11	1.31746e-11
5.04	1.51254e-11	1.49869e-11	1.49039e-11	1.33322e-11	1.32802e-11	1.32369e-11	1.3181e-11
5.06	1.51215e-11	1.49896e-11	1.49066e-11	1.33281e-11	1.32788e-11	1.32361e-11	1.31759e-11
5.08	1.5124e-11	1.49938e-11	1.4912e-11	1.33281e-11	1.32803e-11	1.32354e-11	1.31735e-11
5.1	1.51256e-11	1.49915e-11	1.49105e-11	1.33206e-11	1.32824e-11	1.3233e-11	1.31765e-11
5.12	1.51254e-11	1.4989e-11	1.49095e-11	1.33246e-11	1.32821e-11	1.32343e-11	1.31734e-11
5.14	1.51229e-11	1.49914e-11	1.49076e-11	1.33247e-11	1.32795e-11	1.32319e-11	1.31823e-11
5.16	1.51261e-11	1.49907e-11	1.49111e-11	1.33266e-11	1.32788e-11	1.32311e-11	1.31792e-11
5.18	1.51192e-11	1.49902e-11	1.49059e-11	1.33227e-11	1.32791e-11	1.32306e-11	1.31806e-11
5.2	1.51233e-11	1.49913e-11	1.49045e-11	1.33239e-11	1.32791e-11	1.32388e-11	1.31783e-11
5.22	1.51255e-11	1.49928e-11	1.49091e-11	1.33271e-11	1.32777e-11	1.32368e-11	1.31743e-11
5.24	1.51221e-11	1.49926e-11	1.49104e-11	1.3322e-11	1.32808e-11	1.32371e-11	1.31733e-11
5.26	1.51246e-11	1.49949e-11	1.49082e-11	1.33246e-11	1.32826e-11	1.32363e-11	1.31838e-11
5.28	1.51242e-11	1.49937e-11	1.49103e-11	1.33272e-11	1.32872e-11	1.32369e-11	1.31743e-11
5.3	1.51243e-11	1.49914e-11	1.4914e-11	1.333e-11	1.32841e-11	1.32334e-11	1.31799e-11
5.32	1.51217e-11	1.49917e-11	1.49074e-11	1.33218e-11	1.32847e-11	1.32318e-11	1.31741e-11
5.34	1.51236e-11	1.49942e-11	1.49069e-11	1.33246e-11	1.32817e-11	1.32385e-11	1.31756e-11
5.36	1.51271e-11	1.49931e-11	1.49077e-11	1.3328e-11	1.32819e-11	1.32374e-11	1.31729e-11
5.38	1.51234e-11	1.49934e-11	1.49088e-11	1.33224e-11	1.32816e-11	1.32372e-11	1.31794e-11
5.4	1.51242e-11	1.49908e-11	1.49086e-11	1.33237e-11	1.32819e-11	1.32367e-11	1.31752e-11
5.42	1.51254e-11	1.49953e-11	1.49117e-11	1.33281e-11	1.32819e-11	1.32398e-11	1.318e-11
5.44	1.51278e-11	1.49893e-11	1.49046e-11	1.33199e-11	1.32872e-11	1.32389e-11	1.31733e-11
5.46	1.51232e-11	1.49912e-11	1.49098e-11	1.33261e-11	1.32839e-11	1.32375e-11	1.31755e-11
5.48	1.5123e-11	1.49905e-11	1.49036e-11	1.33308e-11	1.32847e-11	1.32346e-11	1.31758e-11
5.5	1.51212e-11	1.49881e-11	1.49069e-11	1.33219e-11	1.32846e-11	1.32398e-11	1.31765e-11
5.52	1.51279e-11	1.49905e-11	1.49081e-11	1.33248e-11	1.32836e-11	1.32379e-11	1.31784e-11
5.54	1.51225e-11	1.49894e-11	1.49111e-11	1.3324e-11	1.3284e-11	1.32347e-11	1.31764e-11
5.56	1.51279e-11	1.49891e-11	1.4907e-11	1.33282e-11	1.32828e-11	1.32347e-11	1.31724e-11
5.58	1.5128e-11	1.49867e-11	1.49099e-11	1.33239e-11	1.32844e-11	1.32374e-11	1.31777e-11
5.6	1.51299e-11	1.49827e-11	1.4908e-11	1.33238e-11	1.32844e-11	1.32358e-11	1.31712e-11
5.62	1.51294e-11	1.49855e-11	1.49046e-11	1.33213e-11	1.32871e-11	1.32375e-11	1.31545e-11
5.64	1.51267e-11	1.49875e-11	1.4916e-11	1.33247e-11	1.32773e-11	1.32432e-11	1.31783e-11
5.66	1.51252e-11	1.49818e-11	1.49077e-11	1.33272e-11	1.32865e-11	1.32358e-11	1.31735e-11
5.68	1.51335e-11	1.49833e-11	1.49068e-11	1.33219e-11	1.32849e-11	1.32369e-11	1.31598e-11
5.7	1.51282e-11	1.49825e-11	1.49089e-11	1.33274e-11	1.32806e-11	1.32338e-11	1.3142e-11
5.72	1.5128e-11	1.49855e-11	1.49121e-11	1.33208e-11	1.32804e-11	1.32362e-11	1.31335e-11
5.74	1.51284e-11	1.49846e-11	1.4907e-11	1.33259e-11	1.32882e-11	1.32379e-11	1.31247e-11
5.76	1.51244e-11	1.49837e-11	1.49103e-11	1.33236e-11	1.32825e-11	1.32368e-11	1.31181e-11
5.78	1.5129e-11	1.49864e-11	1.49082e-11	1.3322e-11	1.32809e-11	1.32401e-11	1.31108e-11
5.8	1.51273e-11	1.49859e-11	1.49063e-11	1.33258e-11	1.3285e-11	1.32336e-11	1.31069e-11
5.82	1.51309e-11	1.49826e-11	1.49111e-11	1.33233e-11	1.3283e-11	1.32339e-11	1.31089e-11
5.84	1.51237e-11	1.49823e-11	1.49057e-11	1.33201e-11	1.32867e-11	1.32377e-11	1.30984e-11
5.86	1.51267e-11	1.49868e-11	1.49115e-11	1.33282e-11	1.32846e-11	1.32344e-11	1.30988e-11
5.88	1.51291e-11	1.49898e-11	1.49043e-11	1.33222e-11	1.32884e-11	1.32403e-11	1.30959e-11
5.9	1.51293e-11	1.4984e-11	1.49109e-11	1.33222e-11	1.32846e-11	1.3237e-11	1.30901e-11
5.92	1.51297e-11	1.49912e-11	1.49146e-11	1.33267e-11	1.32828e-11	1.32402e-11	1.30896e-11
5.94	1.51334e-11	1.49843e-11	1.49072e-11	1.33239e-11	1.32856e-11	1.32389e-11	1.30888e-11
5.96	1.51267e-11	1.4988e-11	1.49118e-11	1.333e-11	1.32856e-11	1.32361e-11	1.30851e-11
5.98	1.51282e-11	1.49878e-11	1.49078e-11	1.33238e-11	1.32854e-11	1.32401e-11	1.3087e-11
6	1.51275e-11	1.49887e-11	1.49088e-11	1.33238e-11	1.32854e-11	1.32396e-11	1.30852e-11
6.02	1.51256e-11	1.49882e-11	1.49109e-11	1.3322e-11	1.32839e-11	1.32378e-11	1.3085e-11
6.04	1.51268e-11	1.49962e-11	1.4912e-11	1.33271e-11	1.32861e-11	1.32414e-11	1.30907e-11
6.06	1.51286e-11	1.49864e-11	1.49096e-11	1.33243e-11	1.32856e-11	1.32401e-11	1.3085e-11
6.08	1.51288e-11	1.50027e-11	1.47708e-11	1.33236e-11	1.3284e-11	1.32419e-11	1.30851e-11
6.1	1.51326e-11	1.49854e-11	1.46429e-11	1.3328e-11	1.3284e-11	1.3241e-11	1.30813e-11
6.12	1.51296e-11	1.48011e-11	1.45958e-11	1.33273e-11	1.32849e-11	1.324e-11	1.30832e-11
6.14	1.51324e-11	1.46806e-11	1.45892e-11	1.33265e-11	1.32896e-11	1.32414e-11	1.30826e-11
6.16	1.51255e-11	1.46698e-11	1.45839e-11	1.33201e-11	1.32853e-11	1.32431e-11	1.30851e-11
6.18	1.48726e-11	1.46599e-11	1.45853e-11	1.33256e-11	1.32883e-11	1.32396e-11	1.30855e-11
6.2	1.47886e-11	1.46553e-11	1.45778e-11	1.33234e-11	1.32863e-11	1.32398e-11	1.30796e-11
6.22	1.47842e-11	1.466e-11	1.45692e-11	1.33224e-11	1.32828e-11	1.32411e-11	1.30787e-11
6.24	1.47806e-11	1.46644e-11	1.45685e-11	1.33247e-11	1.32838e-11	1.32387e-11	1.30859e-11
6.26	1.4784e-11	1.46658e-11	1.45675e-11	1.33235e-11	1.32844e-11	1.324e-11	1.30797e-11
6.28	1.47862e-11	1.46645e-11	1.45655e-11	1.33247e-11	1.32848e-11	1.32398e-11	1.3079e-11
6.3	1.47881e-11	1.46671e-11	1.4568e-11	1.33272e-11	1.3285e-11	1.32358e-11	1.30726e-11
6.32	1.47943e-11	1.46687e-11	1.45644e-11	1.3325e-11	1.32868e-11	1.3235e-11	1.30723e-11
6.34	1.4796e-11	1.46733e-11	1.45636e-11	1.33273e-11	1.32873e-11	1.32367e-11	1.30785e-11
6.36	1.47955e-11	1.46736e-11	1.45606e-11	1.33252e-11	1.32817e-11	1.32388e-11	1.30795e-11
6.38	1.47979e-11	1.46777e-11	1.45616e-11	1.33262e-11	1.32882e-11	1.32426e-11	1.30753e-11
6.4	1.48023e-11	1.46712e-11	1.45649e-11	1.3326e-11	1.3285e-11	1.3239e-11	1.30765e-11
6.42	1.48054e-11	1.46773e-11	1.45618e-11	1.33295e-11	1.32899e-11	1.32378e-11	1.3079e-11
6.44	1.48084e-11	1.46797e-11	1.45625e-11	1.33237e-11	1.32871e-11	1.32357e-11	1.30765e-11
6.46	1.48078e-11	1.46862e-11	1.45573e-11	1.33262e-11	1.32857e-11	1.3235e-11	1.30695e-11
6.48	1.48049e-11	1.4683e-11	1.45603e-11	1.33251e-11	1.32918e-11	1.32383e-11	1.30789e-11
6.5	1.48063e-11	1.46884e-11	1.4558e-11	1.3327e-11	1.32878e-11	1.32406e-11	1.3075e-11
6.52	1.48109e-11	1.46825e-11	1.45638e-11	1.33293e-11	1.32844e-11	1.32434e-11	1.30737e-11
6.54	1.48162e-11	1.46884e-11	1.45651e-11	1.33247e-11	1.32928e-11	1.32409e-11	1.30727e-11
6.56	1.48127e-11	1.46846e-11	1.45633e-11	1.33263e-11	1.32833e-11	1.32344e-11	1.30775e-11
6.58	1.48163e-11	1.46868e-11	1.45602e-11	1.33289e-11	1.32872e-11	1.32122e-11	1.30739e-11
6.6	1.4816e-11	1.46823e-11	1.45614e-11	1.332e-11	1.32851e-11	1.31884e-11	1.30765e-11
6.62	1.4816e-11	1.46817e-11	1.45592e-11	1.33304e-11	1.32906e-11	1.3171e-11	1.30745e-11
6.64	1.48192e-11	1.46824e-11	1.45642e-11	1.33243e-11	1.32918e-11	1.31666e-11	1.30735e-11
6.66	1.48194e-11	1.46796e-11	1.45673e-11	1.33237e-11	1.32887e-11	1.31608e-11	1.30696e-11
6.68	1.48175e-11	1.46858e-11	1.45672e-11	1.3325e-11	1.32907e-11	1.31488e-11	1.3076e-11
6.7	1.48209e-11	1.4685e-11	1.45636e-11	1.33301e-11	1.32659e-11	1.31428e-11	1.30727e-11
6.72	1.48236e-11	1.46851e-11	1.45662e-11	1.33254e-11	1.32285e-11	1.31367e-11	1.30706e-11
6.74	1.48216e-11	1.46864e-11	1.45657e-11	1.33228e-11	1.32044e-11	1.31314e-11	1.3074e-11
6.76	1.48216e-11	1.46895e-11	1.45683e-11	1.3325e-11	1.31859e-11	1.31301e-11	1.3068e-11
6.78	1.48272e-11	1.4693e-11	1.45664e-11	1.33254e-11	1.31599e-11	1.31272e-11	1.30734e-11
6.8	1.48279e-11	1.46957e-11	1.45659e-11	1.33339e-11	1.31479e-11	1.3128e-11	1.30736e-11
6.82	1.4825e-11	1.46955e-11	1.45644e-11	1.33233e-11	1.31334e-11	1.3125e-11	1.30735e-11
6.84	1.483e-11	1.46938e-11	1.45702e-11	1.32321e-11	1.31311e-11	1.31281e-11	1.30715e-11
6.86	1.48286e-11	1.46908e-11	1.45675e-11	1.31541e-11	1.31247e-11	1.31231e-11	1.30685e-11
6.88	1.48294e-11	1.46907e-11	1.45693e-11	1.31369e-11	1.31271e-11	1.31266e-11	1.30775e-11
6.9	1.48288e-11	1.46907e-11	1.45729e-11	1.31288e-11	1.31213e-11	1.31222e-11	1.3072e-11
6.92	1.4832e-11	1.4691e-11	1.45694e-11	1.31201e-11	1.31229e-11	1.31248e-11	1.30724e-11
6.94	1.48328e-11	1.46929e-11	1.45766e-11	1.31225e-11	1.31271e-11	1.3126e-11	1.30709e-11
6.96	1.48318e-11	1.46962e-11	1.45692e-11	1.31155e-11	1.31289e-11	1.31251e-11	1.30751e-11
6.98	1.48283e-11	1.46975e-11	1.45719e-11	1.31125e-11	1.31247e-11	1.31235e-11	1.30521e-11
7	1.48386e-11	1.46939e-11	1.45772e-11	1.31143e-11	1.31267e-11	1.31174e-11	1.30587e-11
7.02	1.48321e-11	1.46978e-11	1.45744e-11	1.31156e-11	1.3133e-11	1.31228e-11	1.30695e-11
7.04	1.48356e-11	1.46975e-11	1.45732e-11	1.31223e-11	1.31289e-11	1.31225e-11	1.30632e-11
7.06	1.4832e-11	1.46988e-11	1.45748e-11	1.31172e-11	1.3131e-11	1.31188e-11	1.30703e-11
7.08	1.48281e-11	1.47033e-11	1.4573e-11	1.31176e-11	1.3135e-11	1.31259e-11	1.30723e-11
7.1	1.48327e-11	1.46975e-11	1.45734e-11	1.31167e-11	1.3134e-11	1.31176e-11	1.30683e-11
7.12	1.48361e-11	1.47e-11	1.45758e-11	1.31189e-11	1.31344e-11	1.31222e-11	1.30697e-11
7.14	1.48373e-11	1.46987e-11	1.45739e-11	1.31174e-11	1.31362e-11	1.31221e-11	1.3068e-11
7.16	1.48346e-11	1.46963e-11	1.45774e-11	1.31194e-11	1.31297e-11	1.31233e-11	1.30707e-11
7.18	1.48387e-11	1.46986e-11	1.45724e-11	1.31224e-11	1.31297e-11	1.31235e-11	1.30695e-11
7.2	1.48386e-11	1.47041e-11	1.4576e-11	1.31224e-11	1.31297e-11	1.31245e-11	1.30697e-11
7.22	1.48395e-11	1.47044e-11	1.45746e-11	1.31206e-11	1.3137e-11	1.312e-11	1.30713e-11
7.24	1.48415e-11	1.46974e-11	1.45812e-11	1.31211e-11	1.31333e-11	1.31195e-11	1.30748e-11
7.26	1.48348e-11	1.47003e-11	1.45776e-11	1.31201e-11	1.31375e-11	1.31247e-11	1.30669e-11
7.28	1.48383e-11	1.47039e-11	1.45745e-11	1.31198e-11	1.31385e-11	1.31211e-11	1.30674e-11
7.3	1.4841e-11	1.47009e-11	1.45748e-11	1.31236e-11	1.31409e-11	1.31207e-11	1.30675e-11
7.32	1.48375e-11	1.47018e-11	1.45755e-11	1.31212e-11	1.31395e-11	1.31245e-11	1.30704e-11
7.34	1.48343e-11	1.47033e-11	1.4579e-11	1.31237e-11	1.31398e-11	1.31217e-11	1.30661e-11
7.36	1.48389e-11	1.47046e-11	1.45762e-11	1.31214e-11	1.31353e-11	1.31258e-11	1.30685e-11
7.38	1.48425e-11	1.4706e-11	1.45762e-11	1.31223e-11	1.31401e-11	1.31201e-11	1.3071e-11
7.4	1.48407e-11	1.47088e-11	1.45765e-11	1.31231e-11	1.31403e-11	1.31171e-11	1.30683e-11
7.42	1.48402e-11	1.4708e-11	1.45775e-11	1.31199e-11	1.31401e-11	1.31252e-11	1.30673e-11
7.44	1.48421e-11	1.47056e-11	1.45764e-11	1.31243e-11	1.31423e-11	1.31215e-11	1.30687e-11
7.46	1.48464e-11	1.47126e-11	1.45742e-11	1.31255e-11	1.31364e-11	1.31167e-11	1.30694e-11
7.48	1.48457e-11	1.47093e-11	1.45778e-11	1.31193e-11	1.31319e-11	1.31197e-11	1.30692e-11
7.5	1.48411e-11	1.47064e-11	1.45732e-11	1.3127e-11	1.3139e-11	1.31226e-11	1.30666e-11
7.52	1.48421e-11	1.47084e-11	1.45769e-11	1.31234e-11	1.31398e-11	1.31156e-11	1.30646e-11
7.54	1.48472e-11	1.47081e-11	1.45759e-11	1.31214e-11	1.31398e-11	1.31231e-11	1.30681e-11
7.56	1.48426e-11	1.47074e-11	1.45785e-11	1.31219e-11	1.31391e-11	1.31183e-11	1.30632e-11
7.58	1.48445e-11	1.47105e-11	1.45761e-11	1.31182e-11	1.31437e-11	1.31201e-11	1.30608e-11
7.6	1.48431e-11	1.47102e-11	1.45812e-11	1.31272e-11	1.31473e-11	1.31233e-11	1.30659e-11
7.62	1.48452e-11	1.47037e-11	1.45818e-11	1.31256e-11	1.31389e-11	1.31189e-11	1.3067e-11
7.64	1.48476e-11	1.47055e-11	1.45798e-11	1.31244e-11	1.31429e-11	1.31235e-11	1.30699e-11
7.66	1.48535e-11	1.47023e-11	1.45866e-11	1.31184e-11	1.31461e-11	1.31158e-11	1.30677e-11
7.68	1.48493e-11	1.47053e-11	1.45799e-11	1.31232e-11	1.31433e-11	1.31173e-11	1.30683e-11
7.7	1.48514e-11	1.47047e-11	1.45804e-11	1.31234e-11	1.31404e-11	1.31202e-11	1.3065e-11
7.72	1.48467e-11	1.47049e-11	1.45802e-11	1.31236e-11	1.31433e-11	1.3118e-11	1.30683e-11
7.74	1.48495e-11	1.47075e-11	1.45777e-11	1.31205e-11	1.31468e-11	1.31194e-11	1.30725e-11
7.76	1.48428e-11	1.47043e-11	1.4584e-11	1.31231e-11	1.31446e-11	1.31174e-11	1.30658e-11
7.78	1.48496e-11	1.47051e-11	1.45781e-11	1.313e-11	1.31425e-11	1.31154e-11	1.30602e-11
7.8	1.48462e-11	1.47072e-11	1.45864e-11	1.31261e-11	1.31474e-11	1.31111e-11	1.30682e-11
7.82	1.48461e-11	1.47049e-11	1.45825e-11	1.3128e-11	1.31392e-11	1.31143e-11	1.30649e-11
7.84	1.48478e-11	1.47057e-11	1.45775e-11	1.31295e-11	1.31437e-11	1.31149e-11	1.30623e-11
7.86	1.4848e-11	1.47062e-11	1.4584e-11	1.31287e-11	1.31432e-11	1.3119e-11	1.30687e-11
7.88	1.48507e-11	1.47079e-11	1.45824e-11	1.31273e-11	1.31428e-11	1.31151e-11	1.30654e-11
7.9	1.48459e-11	1.47065e-11	1.45817e-11	1.31306e-11	1.31471e-11	1.31113e-11	1.30703e-11
7.92	1.4849e-11	1.47095e-11	1.45859e-11	1.31269e-11	1.31421e-11	1.31164e-11	1.30654e-11
7.94	1.48517e-11	1.47083e-11	1.45855e-11	1.31241e-11	1.31459e-11	1.3114e-11	1.30629e-11
7.96	1.48529e-11	1.47063e-11	1.45824e-11	1.31218e-11	1.3144e-11	1.31118e-11	1.3068e-11
7.98	1.485e-11	1.47076e-11	1.45811e-11	1.31277e-11	1.31444e-11	1.31155e-11	1.30671e-11
8	1.48499e-11	1.47114e-11	1.45811e-11	1.31286e-11	1.31451e-11	1.31131e-11	1.30627e-11
8.02	1.48554e-11	1.47159e-11	1.45813e-11	1.31262e-11	1.31507e-11	1.31186e-11	1.30689e-11
8.04	1.48534e-11	1.47131e-11	1.45835e-11	1.31287e-11	1.31496e-11	1.31141e-11	1.30656e-11
8.06	1.48513e-11	1.47145e-11	1.45803e-11	1.3128e-11	1.31471e-11	1.31114e-11	1.30662e-11
8.08	1.4856e-11	1.4708e-11	1.45838e-11	1.31256e-11	1.3151e-11	1.31165e-11	1.30587e-11
8.1	1.48557e-11	1.47119e-11	1.45804e-11	1.31266e-11	1.31493e-11	1.31139e-11	1.30591e-11
8.12	1.48579e-11	1.47099e-11	1.45797e-11	1.31329e-11	1.31454e-11	1.31192e-11	1.30585e-11
8.14	1.48579e-11	1.47138e-11	1.4585e-11	1.31281e-11	1.31464e-11	1.31183e-11	1.30614e-11
8.16	1.48556e-11	1.47164e-11	1.45835e-11	1.31284e-11	1.31475e-11	1.31186e-11	1.30587e-11
8.18	1.48516e-11	1.47148e-11	1.45847e-11	1.31262e-11	1.3145e-11	1.3116e-11	1.30591e-11
8.2	1.4854e-11	1.4713e-11	1.4581e-11	1.31337e-11	1.31479e-11	1.3115e-11	1.30654e-11
8.22	1.48537e-11	1.47127e-11	1.45849e-11	1.31312e-11	1.31488e-11	1.31163e-11	1.30632e-11
8.24	1.48566e-11	1.47181e-11	1.45806e-11	1.3129e-11	1.31501e-11	1.31143e-11	1.30615e-11
8.26	1.48598e-11	1.47177e-11	1.45888e-11	1.31298e-11	1.31444e-11	1.31124e-11	1.30617e-11
8.28	1.4856e-11	1.47175e-11	1.45826e-11	1.3126e-11	1.31509e-11	1.31137e-11	1.30574e-11
8.3	1.48552e-11	1.47165e-11	1.45824e-11	1.31319e-11	1.31497e-11	1.31185e-11	1.30594e-11
8.32	1.48589e-11	1.47148e-11	1.45839e-11	1.31296e-11	1.31515e-11	1.3119e-11	1.30617e-11
8.34	1.4859e-11	1.47213e-11	1.45832e-11	1.3127e-11	1.31536e-11	1.31188e-11	1.30551e-11
8.36	1.48586e-11	1.47174e-11	1.45839e-11	1.31286e-11	1.31474e-11	1.312e-11	1.30622e-11
8.38	1.48567e-11	1.47149e-11	1.45857e-11	1.31306e-11	1.31509e-11	1.31181e-11	1.30623e-11
8.4	1.48544e-11	1.47143e-11	1.45848e-11	1.31341e-11	1.31456e-11	1.31178e-11	1.30623e-11
8.42	1.48557e-11	1.47126e-11	1.4586e-11	1.31328e-11	1.31506e-11	1.31192e-11	1.30615e-11
8.44	1.486e-11	1.47153e-11	1.45857e-11	1.31292e-11	1.31558e-11	1.31125e-11	1.30556e-11
8.46	1.48621e-11	1.47132e-11	1.45918e-11	1.31309e-11	1.31485e-11	1.31164e-11	1.30589e-11
8.48	1.48571e-11	1.47163e-11	1.45845e-11	1.31265e-11	1.31549e-11	1.31149e-11	1.30634e-11
8.5	1.48628e-11	1.47172e-11	1.45855e-11	1.31297e-11	1.31479e-11	1.31181e-11	1.30631e-11
8.52	1.48579e-11	1.47147e-11	1.45882e-11	1.31349e-11	1.31482e-11	1.31147e-11	1.30614e-11
8.54	1.48625e-11	1.47175e-11	1.45843e-11	1.31293e-11	1.31493e-11	1.31149e-11	1.30567e-11
8.56	1.48616e-11	1.47141e-11	1.4587e-11	1.31302e-11	1.31516e-11	1.31147e-11	1.30658e-11
8.58	1.48619e-11	1.47169e-11	1.45833e-11	1.31313e-11	1.31459e-11	1.31145e-11	1.30637e-11
8.6	1.48614e-11	1.47121e-11	1.4583e-11	1.3131e-11	1.31478e-11	1.31177e-11	1.30615e-11
8.62	1.48625e-11	1.4713e-11	1.45828e-11	1.31265e-11	1.3145e-11	1.31102e-11	1.30606e-11
8.64	1.48624e-11	1.47126e-11	1.45852e-11	1.31307e-11	1.31487e-11	1.31143e-11	1.30634e-11
8.66	1.48629e-11	1.47126e-11	1.45821e-11	1.31319e-11	1.31456e-11	1.31147e-11	1.30658e-11
8.68	1.48666e-11	1.47173e-11	1.4585e-11	1.3134e-11	1.31461e-11	1.31103e-11	1.30669e-11
8.7	1.48672e-11	1.47162e-11	1.45866e-11	1.31328e-11	1.31496e-11	1.31143e-11	1.30636e-11
8.72	1.48627e-11	1.47172e-11	1.45881e-11	1.31317e-11	1.31534e-11	1.31163e-11	1.30579e-11
8.74	1.48689e-11	1.47121e-11	1.45884e-11	1.31347e-11	1.31507e-11	1.3117e-11	1.30568e-11
8.76	1.48638e-11	1.47149e-11	1.45856e-11	1.31315e-11	1.31526e-11	1.3112e-11	1.3061e-11
8.78	1.48664e-11	1.47179e-11	1.4589e-11	1.31324e-11	1.31493e-11	1.31135e-11	1.3061e-11
8.8	1.4861e-11	1.47203e-11	1.4587e-11	1.31356e-11	1.31502e-11	1.31081e-11	1.3057e-11
8.82	1.48632e-11	1.47132e-11	1.45857e-11	1.31266e-11	1.3153e-11	1.31122e-11	1.30609e-11
8.84	1.48679e-11	1.47124e-11	1.45847e-11	1.31314e-11	1.31511e-11	1.31179e-11	1.30599e-11
8.86	1.48632e-11	1.47177e-11	1.45918e-11	1.31316e-11	1.31526e-11	1.31108e-11	1.30645e-11
8.88	1.48636e-11	1.47146e-11	1.45891e-11	1.31272e-11	1.31547e-11	1.31112e-11	1.30637e-11
8.9	1.48614e-11	1.47178e-11	1.45903e-11	1.31343e-11	1.31553e-11	1.3109e-11	1.30634e-11
8.92	1.48625e-11	1.47179e-11	1.45872e-11	1.31348e-11	1.31532e-11	1.31082e-11	1.30606e-11
8.94	1.4866e-11	1.47192e-11	1.45876e-11	1.3136e-11	1.31544e-11	1.31139e-11	1.30619e-11
8.96	1.48661e-11	1.47162e-11	1.45871e-11	1.31324e-11	1.31528e-11	1.31142e-11	1.30616e-11
8.98	1.4869e-11	1.47214e-11	1.45926e-11	1.31394e-11	1.31537e-11	1.3108e-11	1.3059e-11
9	1.48668e-11	1.47165e-11	1.45925e-11	1.3132e-11	1.31546e-11	1.31108e-11	1.30663e-11
9.02	1.48739e-11	1.47179e-11	1.45908e-11	1.31377e-11	1.31591e-11	1.31119e-11	1.30604e-11
9.04	1.48699e-11	1.47194e-11	1.45907e-11	1.31318e-11	1.3158e-11	1.31107e-11	1.30621e-11
9.06	1.48679e-11	1.47217e-11	1.45904e-11	1.31392e-11	1.31555e-11	1.31108e-11	1.30546e-11
9.08	1.48654e-11	1.47221e-11	1.45917e-11	1.3134e-11	1.31516e-11	1.31164e-11	1.30577e-11
9.1	1.48694e-11	1.47215e-11	1.45908e-11	1.31382e-11	1.31549e-11	1.31162e-11	1.30571e-11
9.12	1.48655e-11	1.47267e-11	1.45909e-11	1.31347e-11	1.31512e-11	1.31098e-11	1.3058e-11
9.14	1.48721e-11	1.47207e-11	1.45892e-11	1.31355e-11	1.31527e-11	1.31143e-11	1.30618e-11
9.16	1.48718e-11	1.47274e-11	1.45941e-11	1.31343e-11	1.31554e-11	1.31136e-11	1.30586e-11
9.18	1.48734e-11	1.47277e-11	1.45906e-11	1.31341e-11	1.31564e-11	1.31178e-11	1.30564e-11
9.2	1.48686e-11	1.47269e-11	1.45869e-11	1.31357e-11	1.31525e-11	1.31081e-11	1.30593e-11
9.22	1.487e-11	1.47173e-11	1.45888e-11	1.31358e-11	1.31542e-11	1.31117e-11	1.3059e-11
9.24	1.48676e-11	1.47194e-11	1.45923e-11	1.31299e-11	1.31504e-11	1.3113e-11	1.30572e-11
9.26	1.4868e-11	1.47229e-11	1.45904e-11	1.31401e-11	1.31551e-11	1.3121e-11	1.30552e-11
9.28	1.48707e-11	1.47169e-11	1.45957e-11	1.31296e-11	1.31566e-11	1.31166e-11	1.30532e-11
9.3	1.48668e-11	1.47205e-11	1.45936e-11	1.31353e-11	1.3154e-11	1.31122e-11	1.30524e-11
9.32	1.48714e-11	1.47141e-11	1.45928e-11	1.31333e-11	1.31552e-11	1.31113e-11	1.3058e-11
9.34	1.4866e-11	1.4718e-11	1.4593e-11	1.31339e-11	1.31534e-11	1.31136e-11	1.30557e-11
9.36	1.48647e-11	1.47169e-11	1.4591e-11	1.31385e-11	1.31585e-11	1.31158e-11	1.30554e-11
9.38	1.48688e-11	1.47169e-11	1.45908e-11	1.31405e-11	1.31596e-11	1.31101e-11	1.30572e-11
9.4	1.48691e-11	1.47162e-11	1.459e-11	1.31339e-11	1.31556e-11	1.31134e-11	1.30584e-11
9.42	1.48731e-11	1.47236e-11	1.45904e-11	1.31319e-11	1.31548e-11	1.31119e-11	1.30623e-11
9.44	1.4868e-11	1.47181e-11	1.45894e-11	1.31327e-11	1.31515e-11	1.31119e-11	1.30609e-11
9.46	1.4868e-11	1.47184e-11	1.4594e-11	1.31342e-11	1.31567e-11	1.31128e-11	1.30604e-11
9.48	1.48694e-11	1.47211e-11	1.45961e-11	1.31366e-11	1.31512e-11	1.31107e-11	1.30581e-11
9.5	1.4871e-11	1.47231e-11	1.45952e-11	1.31392e-11	1.31552e-11	1.31079e-11	1.30546e-11
9.52	1.487e-11	1.47215e-11	1.45953e-11	1.31362e-11	1.31592e-11	1.3111e-11	1.30552e-11
9.54	1.48773e-11	1.47195e-11	1.45925e-11	1.31382e-11	1.31581e-11	1.31096e-11	1.30552e-11
9.56	1.4877e-11	1.47256e-11	1.45916e-11	1.3134e-11	1.31526e-11	1.31086e-11	1.30556e-11
9.58	1.48748e-11	1.47247e-11	1.45873e-11	1.31343e-11	1.31574e-11	1.31074e-11	1.30522e-11
9.6	1.48711e-11	1.4722e-11	1.45948e-11	1.31352e-11	1.31628e-11	1.31122e-11	1.30526e-11
9.62	1.48728e-11	1.47257e-11	1.45972e-11	1.31352e-11	1.3158e-11	1.31091e-11	1.30562e-11
9.64	1.48783e-11	1.47245e-11	1.45932e-11	1.31354e-11	1.31566e-11	1.31054e-11	1.30562e-11
9.66	1.48761e-11	1.47274e-11	1.45933e-11	1.31384e-11	1.31625e-11	1.31119e-11	1.30566e-11
9.68	1.48742e-11	1.47261e-11	1.45936e-11	1.31357e-11	1.31583e-11	1.31099e-11	1.3055e-11
9.7	1.48794e-11	1.4724e-11	1.4589e-11	1.31319e-11	1.31633e-11	1.31147e-11	1.30601e-11
9.72	1.48794e-11	1.47219e-11	1.45966e-11	1.31395e-11	1.31564e-11	1.31112e-11	1.30589e-11
9.74	1.4876e-11	1.47293e-11	1.45964e-11	1.31392e-11	1.31627e-11	1.31108e-11	1.30545e-11
9.76	1.48808e-11	1.47256e-11	1.45934e-11	1.31377e-11	1.31577e-11	1.31102e-11	1.30561e-11
9.78	1.48795e-11	1.47218e-11	1.45946e-11	1.31329e-11	1.3157e-11	1.31111e-11	1.30548e-11
9.8	1.48785e-11	1.47285e-11	1.45911e-11	1.31371e-11	1.31579e-11	1.31087e-11	1.30524e-11
9.82	1.48786e-11	1.47246e-11	1.45951e-11	1.31347e-11	1.31556e-11	1.31087e-11	1.30536e-11
9.84	1.48781e-11	1.47266e-11	1.4594e-11	1.31366e-11	1.31494e-11	1.31084e-11	1.30553e-11
9.86	1.48756e-11	1.4727e-11	1.45972e-11	1.3131e-11	1.31566e-11	1.31116e-11	1.30558e-11
9.88	1.48762e-11	1.47276e-11	1.45935e-11	1.31374e-11	1.31558e-11	1.31132e-11	1.30509e-11
9.9	1.48772e-11	1.47295e-11	1.45905e-11	1.31322e-11	1.31559e-11	1.31084e-11	1.30535e-11
9.92	1.48805e-11	1.47289e-11	1.45944e-11	1.31399e-11	1.31518e-11	1.31111e-11	1.30519e-11
9.94	1.48778e-11	1.47278e-11	1.45936e-11	1.31372e-11	1.31588e-11	1.31125e-11	1.30522e-11
9.96	1.48775e-11	1.47276e-11	1.45946e-11	1.31333e-11	1.31539e-11	1.31081e-11	1.30515e-11
9.98	1.48763e-11	1.47287e-11	1.45913e-11	1.31399e-11	1.31526e-11	1.31157e-11	1.30512e-11
10	1.48784e-11	1.47311e-11	1.45899e-11	1.31369e-11	1.31548e-11	1.31099e-11	1.30477e-11
10.02	1.48788e-11	1.47256e-11	1.45927e-11	1.31404e-11	1.31572e-11	1.3108e-11	1.30499e-11
10.04	1.48769e-11	1.47281e-11	1.45906e-11	1.3136e-11	1.31574e-11	1.31122e-11	1.30561e-11
10.06	1.48763e-11	1.47257e-11	1.45923e-11	1.31382e-11	1.31541e-11	1.31069e-11	1.30589e-11
10.08	1.48718e-11	1.47281e-11	1.45946e-11	1.31386e-11	1.31529e-11	1.31088e-11	1.30528e-11
10.1	1.48786e-11	1.47302e-11	1.45991e-11	1.31342e-11	1.31558e-11	1.31087e-11	1.30584e-11
10.12	1.4871e-11	1.47286e-11	1.45934e-11	1.31342e-11	1.31561e-11	1.31067e-11	1.30548e-11
10.14	1.4874e-11	1.47288e-11	1.45926e-11	1.31353e-11	1.31559e-11	1.31095e-11	1.30547e-11
10.16	1.48715e-11	1.4727e-11	1.45904e-11	1.31371e-11	1.31555e-11	1.31097e-11	1.30504e-11
10.18	1.48766e-11	1.47308e-11	1.45958e-11	1.31393e-11	1.31576e-11	1.31112e-11	1.30512e-11
10.2	1.48772e-11	1.47314e-11	1.45955e-11	1.31326e-11	1.31531e-11	1.3114e-11	1.30469e-11
10.22	1.48766e-11	1.47279e-11	1.45982e-11	1.31393e-11	1.3152e-11	1.31109e-11	1.30462e-11
10.24	1.48803e-11	1.47294e-11	1.45964e-11	1.31367e-11	1.31576e-11	1.31073e-11	1.30473e-11
10.26	1.48796e-11	1.47349e-11	1.45969e-11	1.31416e-11	1.31538e-11	1.31059e-11	1.30462e-11
10.28	1.48767e-11	1.4726e-11	1.46001e-11	1.31342e-11	1.31599e-11	1.31092e-11	1.30472e-11
10.3	1.4878e-11	1.47336e-11	1.45972e-11	1.3139e-11	1.31552e-11	1.311e-11	1.30474e-11
10.32	1.48772e-11	1.47299e-11	1.45956e-11	1.31354e-11	1.31584e-11	1.31116e-11	1.30495e-11
10.34	1.48731e-11	1.47318e-11	1.45971e-11	1.31392e-11	1.31589e-11	1.31163e-11	1.3051e-11
10.36	1.48808e-11	1.47323e-11	1.45974e-11	1.31372e-11	1.31602e-11	1.31125e-11	1.3052e-11
10.38	1.48778e-11	1.47297e-11	1.46006e-11	1.31402e-11	1.31592e-11	1.31114e-11	1.30506e-11
10.4	1.48773e-11	1.47334e-11	1.45984e-11	1.31406e-11	1.31584e-11	1.31059e-11	1.30469e-11
10.42	1.48823e-11	1.47324e-11	1.45962e-11	1.31384e-11	1.31596e-11	1.31097e-11	1.30497e-11
10.44	1.48789e-11	1.47315e-11	1.4597e-11	1.31342e-11	1.31598e-11	1.31131e-11	1.30514e-11
10.46	1.48837e-11	1.47321e-11	1.46018e-11	1.31377e-11	1.31587e-11	1.3113e-11	1.30482e-11
10.48	1.48832e-11	1.47289e-11	1.45976e-11	1.31392e-11	1.31586e-11	1.31062e-11	1.30476e-11
10.5	1.48792e-11	1.47288e-11	1.46037e-11	1.31422e-11	1.31574e-11	1.31044e-11	1.30482e-11
10.52	1.488e-11	1.47326e-11	1.45986e-11	1.31405e-11	1.31581e-11	1.31055e-11	1.30463e-11
10.54	1.48795e-11	1.47344e-11	1.45986e-11	1.31341e-11	1.3159e-11	1.31072e-11	1.30509e-11
10.56	1.48768e-11	1.47303e-11	1.46007e-11	1.31346e-11	1.31555e-11	1.31079e-11	1.30494e-11
10.58	1.48818e-11	1.47295e-11	1.45978e-11	1.31392e-11	1.31595e-11	1.31064e-11	1.30485e-11
10.6	1.4881e-11	1.47327e-11	1.45969e-11	1.31324e-11	1.3156e-11	1.31086e-11	1.30429e-11
10.62	1.48804e-11	1.47318e-11	1.4601e-11	1.3138e-11	1.31565e-11	1.31063e-11	1.30477e-11
10.64	1.48787e-11	1.47302e-11	1.45993e-11	1.31391e-11	1.31586e-11	1.31019e-11	1.30456e-11
10.66	1.48821e-11	1.47328e-11	1.46022e-11	1.31404e-11	1.31557e-11	1.31019e-11	1.30426e-11
10.68	1.48801e-11	1.47301e-11	1.46034e-11	1.31386e-11	1.31582e-11	1.31016e-11	1.3053e-11
10.7	1.48805e-11	1.47297e-11	1.46007e-11	1.31372e-11	1.31549e-11	1.31049e-11	1.30519e-11
10.72	1.48805e-11	1.47319e-11	1.4599e-11	1.31378e-11	1.3161e-11	1.31083e-11	1.30475e-11
10.74	1.48811e-11	1.47337e-11	1.46018e-11	1.31376e-11	1.31556e-11	1.31075e-11	1.30491e-11
10.76	1.48821e-11	1.47305e-11	1.46009e-11	1.3138e-11	1.31589e-11	1.31052e-11	1.305e-11
10.78	1.48817e-11	1.47367e-11	1.45962e-11	1.31344e-11	1.31612e-11	1.31081e-11	1.3047e-11
10.8	1.48773e-11	1.47344e-11	1.45981e-11	1.31397e-11	1.31648e-11	1.31043e-11	1.30495e-11
10.82	1.48805e-11	1.47329e-11	1.46018e-11	1.31359e-11	1.31575e-11	1.31077e-11	1.30484e-11
10.84	1.4882e-11	1.47316e-11	1.46047e-11	1.31418e-11	1.31598e-11	1.31129e-11	1.30511e-11
10.86	1.48864e-11	1.47338e-11	1.46026e-11	1.31376e-11	1.31558e-11	1.31052e-11	1.30516e-11
10.88	1.48833e-11	1.47332e-11	1.46003e-11	1.31375e-11	1.31588e-11	1.311e-11	1.3047e-11
10.9	1.48833e-11	1.47293e-11	1.46002e-11	1.31374e-11	1.31601e-11	1.31062e-11	1.30498e-11
10.92	1.48882e-11	1.47342e-11	1.46033e-11	1.31376e-11	1.31599e-11	1.31044e-11	1.30434e-11
10.94	1.48874e-11	1.47376e-11	1.46032e-11	1.314e-11	1.31581e-11	1.31065e-11	1.30502e-11
10.96	1.48847e-11	1.47346e-11	1.46046e-11	1.31393e-11	1.31532e-11	1.31078e-11	1.30471e-11
10.98	1.48889e-11	1.47343e-11	1.46021e-11	1.31401e-11	1.31561e-11	1.31049e-11	1.305e-11
11	1.48898e-11	1.47302e-11	1.46063e-11	1.31362e-11	1.31591e-11	1.31073e-11	1.30417e-11
11.02	1.48884e-11	1.47302e-11	1.46043e-11	1.3137e-11	1.31555e-11	1.3106e-11	1.30415e-11
11.04	1.48878e-11	1.47294e-11	1.46041e-11	1.31384e-11	1.31595e-11	1.31011e-11	1.30454e-11
11.06	1.48931e-11	1.4728e-11	1.46015e-11	1.31421e-11	1.31654e-11	1.31075e-11	1.30421e-11
11.08	1.48903e-11	1.47277e-11	1.46017e-11	1.31402e-11	1.31589e-11	1.31046e-11	1.30454e-11
11.1	1.48883e-11	1.47308e-11	1.45965e-11	1.31435e-11	1.3161e-11	1.31013e-11	1.30441e-11
11.12	1.48885e-11	1.47278e-11	1.46029e-11	1.31429e-11	1.31582e-11	1.31071e-11	1.30413e-11
11.14	1.48915e-11	1.47271e-11	1.46014e-11	1.31356e-11	1.31615e-11	1.31049e-11	1.30456e-11
11.16	1.48879e-11	1.47318e-11	1.45958e-11	1.31388e-11	1.31631e-11	1.31052e-11	1.30472e-11
11.18	1.48946e-11	1.47313e-11	1.46057e-11	1.31397e-11	1.3159e-11	1.31081e-11	1.30502e-11
11.2	1.4891e-11	1.47323e-11	1.46064e-11	1.31375e-11	1.31606e-11	1.31067e-11	1.3043e-11
11.22	1.48916e-11	1.47298e-11	1.46052e-11	1.31378e-11	1.31591e-11	1.31058e-11	1.30487e-11
11.24	1.48899e-11	1.47293e-11	1.46041e-11	1.31399e-11	1.31599e-11	1.31045e-11	1.30423e-11
11.26	1.48935e-11	1.47316e-11	1.46015e-11	1.31403e-11	1.31548e-11	1.31059e-11	1.3045e-11
11.28	1.48913e-11	1.4733e-11	1.46024e-11	1.31429e-11	1.31579e-11	1.31031e-11	1.30438e-11
11.3	1.48915e-11	1.47345e-11	1.46072e-11	1.31453e-11	1.31594e-11	1.31044e-11	1.30449e-11
11.32	1.4894e-11	1.47359e-11	1.46028e-11	1.31438e-11	1.31605e-11	1.31057e-11	1.30464e-11
11.34	1.48899e-11	1.47341e-11	1.45973e-11	1.31373e-11	1.31581e-11	1.31061e-11	1.30403e-11
11.36	1.48917e-11	1.4729e-11	1.46002e-11	1.31371e-11	1.31606e-11	1.31064e-11	1.30437e-11
11.38	1.48907e-11	1.47316e-11	1.46042e-11	1.31419e-11	1.31583e-11	1.30996e-11	1.30449e-11
11.4	1.48912e-11	1.47318e-11	1.46012e-11	1.31415e-11	1.31592e-11	1.31025e-11	1.3039e-11
11.42	1.48936e-11	1.47348e-11	1.46081e-11	1.31422e-11	1.31653e-11	1.31021e-11	1.30454e-11
11.44	1.48946e-11	1.47331e-11	1.46056e-11	1.31402e-11	1.31616e-11	1.31057e-11	1.30462e-11
11.46	1.48902e-11	1.4734e-11	1.46013e-11	1.31367e-11	1.31622e-11	1.31055e-11	1.30389e-11
11.48	1.48937e-11	1.47351e-11	1.46076e-11	1.31371e-11	1.31621e-11	1.31001e-11	1.30397e-11
11.5	1.49015e-11	1.47342e-11	1.46102e-11	1.31426e-11	1.3159e-11	1.31002e-11	1.3043e-11
11.52	1.48969e-11	1.47354e-11	1.46059e-11	1.31429e-11	1.31643e-11	1.31073e-11	1.30438e-11
11.54	1.48918e-11	1.47345e-11	1.46047e-11	1.314e-11	1.31605e-11	1.31008e-11	1.30438e-11
11.56	1.48899e-11	1.47358e-11	1.46091e-11	1.31445e-11	1.31561e-11	1.31042e-11	1.30445e-11
11.58	1.4893e-11	1.47352e-11	1.46076e-11	1.31344e-11	1.3164e-11	1.31048e-11	1.30418e-11
11.6	1.48926e-11	1.47278e-11	1.46103e-11	1.31431e-11	1.31655e-11	1.31054e-11	1.30426e-11
11.62	1.48945e-11	1.47335e-11	1.4606e-11	1.31419e-11	1.3162e-11	1.31013e-11	1.30464e-11
11.64	1.4894e-11	1.47361e-11	1.46099e-11	1.31371e-11	1.31582e-11	1.3103e-11	1.30463e-11
11.66	1.4894e-11	1.47339e-11	1.46049e-11	1.31485e-11	1.31672e-11	1.31044e-11	1.30487e-11
11.68	1.48937e-11	1.47356e-11	1.46054e-11	1.31464e-11	1.31632e-11	1.31017e-11	1.30402e-11
11.7	1.4894e-11	1.47363e-11	1.46066e-11	1.31348e-11	1.31612e-11	1.31025e-11	1.30394e-11
11.72	1.48894e-11	1.47364e-11	1.46065e-11	1.31387e-11	1.31618e-11	1.3104e-11	1.30476e-11
11.74	1.48938e-11	1.47366e-11	1.46042e-11	1.31402e-11	1.3162e-11	1.31071e-11	1.3042e-11
11.76	1.48938e-11	1.47364e-11	1.46036e-11	1.3142e-11	1.31576e-11	1.31022e-11	1.3041e-11
11.78	1.48981e-11	1.47347e-11	1.46086e-11	1.31433e-11	1.31638e-11	1.31017e-11	1.30465e-11
11.8	1.48965e-11	1.47373e-11	1.46045e-11	1.31431e-11	1.31627e-11	1.30992e-11	1.30494e-11
11.82	1.48942e-11	1.47339e-11	1.46035e-11	1.31418e-11	1.31588e-11	1.31029e-11	1.30425e-11
11.84	1.48934e-11	1.47396e-11	1.46037e-11	1.31448e-11	1.31612e-11	1.31021e-11	1.30423e-11
11.86	1.48945e-11	1.4739e-11	1.46047e-11	1.31433e-11	1.31603e-11	1.31003e-11	1.30468e-11
11.88	1.48955e-11	1.47362e-11	1.46018e-11	1.31401e-11	1.31628e-11	1.30985e-11	1.30494e-11
11.9	1.48906e-11	1.47355e-11	1.46002e-11	1.31441e-11	1.31609e-11	1.31042e-11	1.30434e-11
11.92	1.48959e-11	1.47341e-11	1.46028e-11	1.31425e-11	1.3165e-11	1.31016e-11	1.30433e-11
11.94	1.48961e-11	1.47399e-11	1.46017e-11	1.31415e-11	1.31629e-11	1.31029e-11	1.3043e-11
11.96	1.48977e-11	1.47381e-11	1.46015e-11	1.31432e-11	1.31653e-11	1.31009e-11	1.30415e-11
11.98	1.48936e-11	1.47383e-11	1.45985e-11	1.314e-11	1.31654e-11	1.31074e-11	1.30409e-11
12	1.4891e-11	1.47398e-11	1.46062e-11	1.31451e-11	1.31635e-11	1.31073e-11	1.30442e-11
12.02	1.48954e-11	1.47364e-11	1.4604e-11	1.31473e-11	1.31664e-11	1.31051e-11	1.30434e-11
12.04	1.48952e-11	1.47353e-11	1.46002e-11	1.31453e-11	1.31636e-11	1.31024e-11	1.30395e-11
12.06	1.4891e-11	1.47396e-11	1.46069e-11	1.31387e-11	1.31596e-11	1.31026e-11	1.30448e-11
12.08	1.4896e-11	1.47398e-11	1.46029e-11	1.31437e-11	1.31645e-11	1.31045e-11	1.30388e-11
12.1	1.48913e-11	1.47395e-11	1.46049e-11	1.31371e-11	1.31617e-11	1.31028e-11	1.30474e-11
12.12	1.4896e-11	1.47399e-11	1.46031e-11	1.31406e-11	1.31643e-11	1.31053e-11	1.30429e-11
12.14	1.48953e-11	1.47381e-11	1.46015e-11	1.31426e-11	1.31625e-11	1.31028e-11	1.3043e-11
12.16	1.48952e-11	1.47399e-11	1.46023e-11	1.31411e-11	1.31629e-11	1.31063e-11	1.30365e-11
12.18	1.4892e-11	1.47432e-11	1.46022e-11	1.31403e-11	1.31629e-11	1.30992e-11	1.30444e-11
12.2	1.48888e-11	1.47452e-11	1.45933e-11	1.31425e-11	1.31634e-11	1.31021e-11	1.30399e-11
12.22	1.4898e-11	1.47467e-11	1.45996e-11	1.31421e-11	1.31634e-11	1.31014e-11	1.30429e-11
12.24	1.48983e-11	1.47447e-11	1.45997e-11	1.31424e-11	1.31675e-11	1.31047e-11	1.30376e-11
12.26	1.48937e-11	1.47441e-11	1.45971e-11	1.31411e-11	1.31634e-11	1.3103e-11	1.30403e-11
12.28	1.48952e-11	1.4743e-11	1.45924e-11	1.31456e-11	1.3163e-11	1.31027e-11	1.30397e-11
12.3	1.48981e-11	1.47466e-11	1.46016e-11	1.31419e-11	1.31653e-11	1.31042e-11	1.3041e-11
12.32	1.48933e-11	1.4745e-11	1.46001e-11	1.31471e-11	1.31642e-11	1.31017e-11	1.30444e-11
12.34	1.48937e-11	1.47473e-11	1.45985e-11	1.31456e-11	1.31621e-11	1.31032e-11	1.3043e-11
12.36	1.48945e-11	1.47474e-11	1.45974e-11	1.31458e-11	1.31631e-11	1.31043e-11	1.30409e-11
12.38	1.49024e-11	1.47442e-11	1.45978e-11	1.31415e-11	1.31592e-11	1.31014e-11	1.30407e-11
12.4	1.48957e-11	1.47429e-11	1.45993e-11	1.31434e-11	1.31631e-11	1.31044e-11	1.30372e-11
12.42	1.4895e-11	1.47461e-11	1.46008e-11	1.31395e-11	1.31621e-11	1.31024e-11	1.30375e-11
12.44	1.48946e-11	1.4746e-11	1.46023e-11	1.31441e-11	1.31602e-11	1.31047e-11	1.30337e-11
12.46	1.48947e-11	1.47461e-11	1.45956e-11	1.31411e-11	1.31607e-11	1.31059e-11	1.30413e-11
12.48	1.48983e-11	1.47499e-11	1.45996e-11	1.31488e-11	1.31641e-11	1.31028e-11	1.30449e-11
12.5	1.48942e-11	1.47483e-11	1.46027e-11	1.31468e-11	1.31644e-11	1.31016e-11	1.30459e-11
12.52	1.48973e-11	1.47454e-11	1.45985e-11	1.31469e-11	1.31614e-11	1.31014e-11	1.30438e-11
12.54	1.48924e-11	1.47472e-11	1.4601e-11	1.31447e-11	1.31641e-11	1.31102e-11	1.30416e-11
12.56	1.48943e-11	1.47456e-11	1.4605e-11	1.31461e-11	1.31651e-11	1.31105e-11	1.30418e-11
12.58	1.48971e-11	1.47443e-11	1.46007e-11	1.31493e-11	1.31637e-11	1.31089e-11	1.30429e-11
12.6	1.48951e-11	1.4745e-11	1.46031e-11	1.31455e-11	1.31633e-11	1.30987e-11	1.30426e-11
12.62	1.48954e-11	1.47459e-11	1.45986e-11	1.31457e-11	1.31626e-11	1.3106e-11	1.30413e-11
12.64	1.48947e-11	1.47498e-11	1.4606e-11	1.31493e-11	1.31686e-11	1.3105e-11	1.30429e-11
12.66	1.48929e-11	1.47486e-11	1.46058e-11	1.31489e-11	1.31633e-11	1.30986e-11	1.30362e-11
12.68	1.48955e-11	1.47484e-11	1.46038e-11	1.31447e-11	1.31641e-11	1.31027e-11	1.3038e-11
12.7	1.4897e-11	1.47442e-11	1.4601e-11	1.31478e-11	1.31611e-11	1.31099e-11	1.304e-11
12.72	1.48981e-11	1.47475e-11	1.45998e-11	1.31452e-11	1.31673e-11	1.31031e-11	1.30375e-11
12.74	1.48968e-11	1.47522e-11	1.45957e-11	1.31474e-11	1.31642e-11	1.31074e-11	1.3043e-11
12.76	1.48994e-11	1.47486e-11	1.46005e-11	1.31475e-11	1.31628e-11	1.31048e-11	1.30402e-11
12.78	1.48991e-11	1.47545e-11	1.45958e-11	1.31425e-11	1.31592e-11	1.31101e-11	1.30417e-11
12.8	1.48988e-11	1.4749e-11	1.4603e-11	1.31415e-11	1.31646e-11	1.31031e-11	1.304e-11
12.82	1.48995e-11	1.4749e-11	1.46021e-11	1.31478e-11	1.31657e-11	1.31093e-11	1.30439e-11
12.84	1.48987e-11	1.47508e-11	1.45991e-11	1.3143e-11	1.31614e-11	1.31003e-11	1.3041e-11
12.86	1.4903e-11	1.47513e-11	1.46054e-11	1.31395e-11	1.31623e-11	1.31004e-11	1.30436e-11
12.88	1.49004e-11	1.4754e-11	1.46018e-11	1.31389e-11	1.31596e-11	1.31063e-11	1.30392e-11
12.9	1.49026e-11	1.47523e-11	1.45956e-11	1.31397e-11	1.31637e-11	1.31033e-11	1.30409e-11
12.92	1.48975e-11	1.47504e-11	1.45994e-11	1.3149e-11	1.31637e-11	1.31015e-11	1.30399e-11
12.94	1.4901e-11	1.47539e-11	1.46027e-11	1.31475e-11	1.31682e-11	1.30977e-11	1.30434e-11
12.96	1.48957e-11	1.47505e-11	1.46041e-11	1.31463e-11	1.31666e-11	1.30998e-11	1.30424e-11
12.98	1.48987e-11	1.47536e-11	1.45971e-11	1.31387e-11	1.31621e-11	1.3104e-11	1.30434e-11
13	1.49032e-11	1.47518e-11	1.4598e-11	1.31441e-11	1.31615e-11	1.31033e-11	1.3047e-11
13.02	1.49032e-11	1.47512e-11	1.46009e-11	1.31513e-11	1.31649e-11	1.31084e-11	1.30434e-11
13.04	1.48987e-11	1.4756e-11	1.46012e-11	1.3146e-11	1.31651e-11	1.31008e-11	1.30408e-11
13.06	1.49038e-11	1.47539e-11	1.46014e-11	1.31458e-11	1.31687e-11	1.3104e-11	1.30429e-11
13.08	1.49048e-11	1.47507e-11	1.45972e-11	1.3151e-11	1.31687e-11	1.3106e-11	1.30451e-11
13.1	1.49006e-11	1.4748e-11	1.46015e-11	1.31465e-11	1.31644e-11	1.30999e-11	1.3047e-11
13.12	1.49042e-11	1.47477e-11	1.45996e-11	1.31508e-11	1.31588e-11	1.3097e-11	1.30451e-11
13.14	1.48993e-11	1.47504e-11	1.45988e-11	1.3148e-11	1.31579e-11	1.31019e-11	1.30473e-11
13.16	1.49039e-11	1.47515e-11	1.45977e-11	1.31491e-11	1.31659e-11	1.31013e-11	1.30392e-11
13.18	1.48998e-11	1.47526e-11	1.45988e-11	1.31469e-11	1.31626e-11	1.31008e-11	1.30482e-11
13.2	1.49064e-11	1.47503e-11	1.45988e-11	1.31441e-11	1.31672e-11	1.31038e-11	1.30469e-11
13.22	1.49009e-11	1.47523e-11	1.46019e-11	1.31451e-11	1.31671e-11	1.31028e-11	1.30409e-11
13.24	1.49071e-11	1.47485e-11	1.45983e-11	1.3152e-11	1.3165e-11	1.30994e-11	1.30406e-11
13.26	1.49089e-11	1.47544e-11	1.45977e-11	1.31483e-11	1.3167e-11	1.31057e-11	1.30403e-11
13.28	1.49024e-11	1.47515e-11	1.45948e-11	1.31449e-11	1.31705e-11	1.31e-11	1.30389e-11
13.3	1.49023e-11	1.47518e-11	1.4601e-11	1.31443e-11	1.31647e-11	1.31057e-11	1.30381e-11
13.32	1.49003e-11	1.47544e-11	1.45989e-11	1.31493e-11	1.31647e-11	1.31024e-11	1.30432e-11
13.34	1.49049e-11	1.47488e-11	1.46043e-11	1.31469e-11	1.31715e-11	1.31049e-11	1.30373e-11
13.36	1.48999e-11	1.47454e-11	1.46014e-11	1.31481e-11	1.31669e-11	1.31068e-11	1.30368e-11
13.38	1.49028e-11	1.47513e-11	1.46019e-11	1.31446e-11	1.31654e-11	1.31057e-11	1.30382e-11
13.4	1.49013e-11	1.47508e-11	1.46026e-11	1.31522e-11	1.31669e-11	1.3098e-11	1.30446e-11
13.42	1.49062e-11	1.47516e-11	1.46068e-11	1.31499e-11	1.3169e-11	1.31014e-11	1.30369e-11
13.44	1.49018e-11	1.47462e-11	1.46008e-11	1.3151e-11	1.31667e-11	1.31035e-11	1.3041e-11
13.46	1.49022e-11	1.47499e-11	1.45993e-11	1.31505e-11	1.31687e-11	1.31032e-11	1.30364e-11
13.48	1.48998e-11	1.47492e-11	1.45985e-11	1.31469e-11	1.3167e-11	1.31059e-11	1.30382e-11
13.5	1.49057e-11	1.47492e-11	1.46e-11	1.31436e-11	1.31618e-11	1.31063e-11	1.30378e-11
13.52	1.49093e-11	1.47556e-11	1.46001e-11	1.3148e-11	1.31665e-11	1.31071e-11	1.30355e-11
13.54	1.49055e-11	1.47513e-11	1.46028e-11	1.31527e-11	1.31686e-11	1.31066e-11	1.30453e-11
13.56	1.49111e-11	1.47531e-11	1.4605e-11	1.31526e-11	1.31661e-11	1.30997e-11	1.30424e-11
13.58	1.49088e-11	1.4754e-11	1.46007e-11	1.31474e-11	1.31729e-11	1.31024e-11	1.30412e-11
13.6	1.49073e-11	1.475e-11	1.46001e-11	1.3147e-11	1.31644e-11	1.31059e-11	1.30421e-11
13.62	1.49057e-11	1.47573e-11	1.46021e-11	1.31482e-11	1.31631e-11	1.31046e-11	1.30442e-11
13.64	1.49104e-11	1.47561e-11	1.46036e-11	1.31506e-11	1.31693e-11	1.30985e-11	1.30419e-11
13.66	1.49091e-11	1.47533e-11	1.46006e-11	1.31454e-11	1.31624e-11	1.31024e-11	1.3042e-11
13.68	1.49041e-11	1.47553e-11	1.45989e-11	1.3149e-11	1.31682e-11	1.3106e-11	1.30424e-11
13.7	1.49085e-11	1.4752e-11	1.4603e-11	1.31459e-11	1.31663e-11	1.31012e-11	1.30374e-11
13.72	1.49117e-11	1.47574e-11	1.46046e-11	1.31462e-11	1.31658e-11	1.30989e-11	1.30364e-11
13.74	1.49055e-11	1.47561e-11	1.46062e-11	1.3147e-11	1.3168e-11	1.31055e-11	1.30359e-11
13.76	1.49133e-11	1.47531e-11	1.46038e-11	1.31498e-11	1.31685e-11	1.30958e-11	1.30392e-11
13.78	1.4911e-11	1.47517e-11	1.46041e-11	1.3147e-11	1.31651e-11	1.31014e-11	1.30376e-11
13.8	1.49055e-11	1.47557e-11	1.45988e-11	1.31524e-11	1.31709e-11	1.3099e-11	1.30444e-11
13.82	1.49061e-11	1.47517e-11	1.45993e-11	1.31496e-11	1.317e-11	1.31019e-11	1.30356e-11
13.84	1.49045e-11	1.47538e-11	1.46038e-11	1.31466e-11	1.31719e-11	1.30988e-11	1.30398e-11
13.86	1.49029e-11	1.47555e-11	1.45996e-11	1.31479e-11	1.31669e-11	1.31018e-11	1.30383e-11
13.88	1.49052e-11	1.47574e-11	1.46044e-11	1.31453e-11	1.3166e-11	1.31054e-11	1.30358e-11
13.9	1.49143e-11	1.47587e-11	1.45994e-11	1.3149e-11	1.31681e-11	1.31013e-11	1.304e-11
13.92	1.49089e-11	1.47584e-11	1.45989e-11	1.31512e-11	1.31642e-11	1.31009e-11	1.30366e-11
13.94	1.49095e-11	1.47589e-11	1.46055e-11	1.31525e-11	1.31686e-11	1.31028e-11	1.30387e-11
13.96	1.49122e-11	1.47617e-11	1.46048e-11	1.31495e-11	1.3171e-11	1.30955e-11	1.3037e-11
13.98	1.49065e-11	1.47559e-11	1.46005e-11	1.31503e-11	1.31679e-11	1.30933e-11	1.30375e-11
14	1.49068e-11	1.47537e-11	1.45978e-11	1.31499e-11	1.31703e-11	1.30952e-11	1.30396e-11
14.02	1.49141e-11	1.47544e-11	1.46038e-11	1.31508e-11	1.31719e-11	1.30969e-11	1.30384e-11
14.04	1.49114e-11	1.47554e-11	1.46015e-11	1.3148e-11	1.31689e-11	1.30958e-11	1.30383e-11
14.06	1.49109e-11	1.47563e-11	1.46019e-11	1.31496e-11	1.31656e-11	1.31e-11	1.30324e-11
14.08	1.49138e-11	1.47534e-11	1.46008e-11	1.31503e-11	1.31685e-11	1.30976e-11	1.30328e-11
14.1	1.49107e-11	1.47477e-11	1.46023e-11	1.31511e-11	1.31684e-11	1.30946e-11	1.30374e-11
14.12	1.49099e-11	1.47524e-11	1.4601e-11	1.31539e-11	1.31738e-11	1.30995e-11	1.30382e-11
14.14	1.49099e-11	1.47601e-11	1.46012e-11	1.31528e-11	1.31674e-11	1.30985e-11	1.30305e-11
14.16	1.49082e-11	1.47557e-11	1.45994e-11	1.31516e-11	1.31643e-11	1.30995e-11	1.30397e-11
14.18	1.49098e-11	1.47528e-11	1.46013e-11	1.31474e-11	1.31696e-11	1.30936e-11	1.30311e-11
14.2	1.49102e-11	1.47564e-11	1.46023e-11	1.31492e-11	1.31642e-11	1.30913e-11	1.30356e-11
14.22	1.49076e-11	1.47521e-11	1.4597e-11	1.31491e-11	1.31624e-11	1.30953e-11	1.30359e-11
14.24	1.49176e-11	1.47584e-11	1.46012e-11	1.31527e-11	1.31646e-11	1.30995e-11	1.30376e-11
14.26	1.49105e-11	1.47517e-11	1.4599e-11	1.31523e-11	1.31637e-11	1.30988e-11	1.30355e-11
14.28	1.4909e-11	1.47528e-11	1.46051e-11	1.31542e-11	1.31643e-11	1.30986e-11	1.30417e-11
14.3	1.49133e-11	1.47531e-11	1.46034e-11	1.31509e-11	1.31658e-11	1.30944e-11	1.30352e-11
14.32	1.49104e-11	1.47496e-11	1.46042e-11	1.31499e-11	1.31649e-11	1.30982e-11	1.30414e-11
14.34	1.49103e-11	1.47541e-11	1.46078e-11	1.31499e-11	1.31645e-11	1.30993e-11	1.30325e-11
14.36	1.49104e-11	1.47538e-11	1.46013e-11	1.31505e-11	1.3161e-11	1.30966e-11	1.30366e-11
14.38	1.4912e-11	1.47576e-11	1.46034e-11	1.31471e-11	1.31666e-11	1.31007e-11	1.3033e-11
14.4	1.4908e-11	1.47511e-11	1.46037e-11	1.31486e-11	1.31671e-11	1.30987e-11	1.3035e-11
14.42	1.4905e-11	1.47494e-11	1.4601e-11	1.31521e-11	1.31687e-11	1.31014e-11	1.30354e-11
14.44	1.49107e-11	1.47526e-11	1.46027e-11	1.31492e-11	1.31647e-11	1.31027e-11	1.30363e-11
14.46	1.49098e-11	1.4749e-11	1.46025e-11	1.31519e-11	1.31679e-11	1.3099e-11	1.30351e-11
14.48	1.49129e-11	1.47533e-11	1.46061e-11	1.31503e-11	1.31618e-11	1.30946e-11	1.30363e-11
14.5	1.49092e-11	1.47548e-11	1.46054e-11	1.31494e-11	1.316e-11	1.3099e-11	1.30349e-11
14.52	1.4907e-11	1.4753e-11	1.46072e-11	1.31479e-11	1.31671e-11	1.30938e-11	1.30376e-11
14.54	1.4913e-11	1.4759e-11	1.46038e-11	1.31532e-11	1.31656e-11	1.30952e-11	1.30383e-11
14.56	1.49114e-11	1.47606e-11	1.4605e-11	1.31536e-11	1.31623e-11	1.30939e-11	1.30354e-11
14.58	1.49107e-11	1.47566e-11	1.46057e-11	1.31525e-11	1.31604e-11	1.30948e-11	1.30329e-11
14.6	1.49099e-11	1.47506e-11	1.45981e-11	1.31537e-11	1.31629e-11	1.30971e-11	1.30347e-11
14.62	1.4912e-11	1.47531e-11	1.46058e-11	1.31519e-11	1.31598e-11	1.30947e-11	1.30353e-11
14.64	1.49103e-11	1.47579e-11	1.46036e-11	1.31548e-11	1.31641e-11	1.30979e-11	1.30343e-11
14.66	1.49061e-11	1.47552e-11	1.4605e-11	1.31536e-11	1.31642e-11	1.3095e-11	1.30336e-11
14.68	1.49076e-11	1.47548e-11	1.46049e-11	1.31479e-11	1.31651e-11	1.31016e-11	1.3038e-11
14.7	1.491e-11	1.47623e-11	1.46003e-11	1.31556e-11	1.31656e-11	1.30971e-11	1.30347e-11
14.72	1.49131e-11	1.47582e-11	1.4605e-11	1.31558e-11	1.31695e-11	1.30991e-11	1.30328e-11
14.74	1.4916e-11	1.47541e-11	1.46037e-11	1.31596e-11	1.31616e-11	1.30959e-11	1.30375e-11
14.76	1.49156e-11	1.47581e-11	1.46018e-11	1.31527e-11	1.31674e-11	1.3094e-11	1.30383e-11
14.78	1.49165e-11	1.4757e-11	1.46035e-11	1.31499e-11	1.31668e-11	1.30983e-11	1.30394e-11
14.8	1.49185e-11	1.47565e-11	1.46059e-11	1.31479e-11	1.31654e-11	1.30959e-11	1.30354e-11
14.82	1.49127e-11	1.47554e-11	1.46007e-11	1.31535e-11	1.31628e-11	1.30991e-11	1.30319e-11
14.84	1.49137e-11	1.47573e-11	1.46043e-11	1.31541e-11	1.31693e-11	1.30994e-11	1.30309e-11
14.86	1.49117e-11	1.47553e-11	1.46035e-11	1.31536e-11	1.31642e-11	1.31002e-11	1.30323e-11
14.88	1.49154e-11	1.47612e-11	1.46038e-11	1.31561e-11	1.31645e-11	1.30958e-11	1.30302e-11
14.9	1.49168e-11	1.47589e-11	1.46006e-11	1.31543e-11	1.31611e-11	1.30993e-11	1.3031e-11
14.92	1.49204e-11	1.47595e-11	1.45972e-11	1.31593e-11	1.31652e-11	1.31004e-11	1.30318e-11
14.94	1.49153e-11	1.47557e-11	1.45954e-11	1.3158e-11	1.31616e-11	1.30957e-11	1.30343e-11
14.96	1.49178e-11	1.47557e-11	1.46031e-11	1.31536e-11	1.31579e-11	1.30985e-11	1.30377e-11
14.98	1.49194e-11	1.47596e-11	1.46028e-11	1.31527e-11	1.31629e-11	1.31015e-11	1.30382e-11
15	1.49121e-11	1.4763e-11	1.46051e-11	1.31552e-11	1.31584e-11	1.31017e-11	1.30351e-11
15.02	1.49131e-11	1.47584e-11	1.46068e-11	1.31526e-11	1.31671e-11	1.30931e-11	1.30349e-11
15.04	1.49148e-11	1.47583e-11	1.46027e-11	1.3154e-11	1.31621e-11	1.31e-11	1.30397e-11
15.06	1.49142e-11	1.47598e-11	1.46061e-11	1.31574e-11	1.3161e-11	1.30991e-11	1.30339e-11
15.08	1.4915e-11	1.47542e-11	1.46061e-11	1.31556e-11	1.31624e-11	1.30984e-11	1.30308e-11
15.1	1.49154e-11	1.47587e-11	1.45988e-11	1.3151e-11	1.31627e-11	1.30984e-11	1.30295e-11
15.12	1.49121e-11	1.47597e-11	1.46033e-11	1.31551e-11	1.31654e-11	1.30965e-11	1.30438e-11
15.14	1.49144e-11	1.47613e-11	1.46035e-11	1.31537e-11	1.31655e-11	1.30987e-11	1.30357e-11
15.16	1.49175e-11	1.47547e-11	1.46044e-11	1.31525e-11	1.31669e-11	1.30967e-11	1.30346e-11
15.18	1.49177e-11	1.4758e-11	1.46045e-11	1.31566e-11	1.31613e-11	1.30985e-11	1.30376e-11
15.2	1.49108e-11	1.47566e-11	1.46014e-11	1.31558e-11	1.31588e-11	1.31046e-11	1.30306e-11
15.22	1.49112e-11	1.47591e-11	1.45984e-11	1.31526e-11	1.31623e-11	1.30965e-11	1.30372e-11
15.24	1.49112e-11	1.47564e-11	1.46013e-11	1.31561e-11	1.31653e-11	1.31e-11	1.30337e-11
15.26	1.49148e-11	1.47558e-11	1.46033e-11	1.31558e-11	1.31697e-11	1.30943e-11	1.30313e-11
15.28	1.49113e-11	1.47586e-11	1.46037e-11	1.31503e-11	1.31636e-11	1.30944e-11	1.30365e-11
15.3	1.49065e-11	1.47597e-11	1.46029e-11	1.31551e-11	1.31686e-11	1.30934e-11	1.30292e-11
15.32	1.49108e-11	1.47601e-11	1.46043e-11	1.31529e-11	1.31643e-11	1.30962e-11	1.3042e-11
15.34	1.49149e-11	1.4758e-11	1.45994e-11	1.31502e-11	1.31676e-11	1.31003e-11	1.30532e-11
15.36	1.49157e-11	1.47632e-11	1.46033e-11	1.31527e-11	1.31655e-11	1.30987e-11	1.30351e-11
15.38	1.49131e-11	1.47601e-11	1.46028e-11	1.31491e-11	1.31668e-11	1.30982e-11	1.30403e-11
15.4	1.49175e-11	1.47583e-11	1.46069e-11	1.31515e-11	1.31713e-11	1.30946e-11	1.30457e-11
15.42	1.49168e-11	1.47539e-11	1.46041e-11	1.31546e-11	1.31626e-11	1.30997e-11	1.30623e-11
15.44	1.49173e-11	1.4758e-11	1.46029e-11	1.31477e-11	1.31668e-11	1.3097e-11	1.30738e-11
15.46	1.49189e-11	1.47581e-11	1.46018e-11	1.31566e-11	1.31702e-11	1.30967e-11	1.30804e-11
15.48	1.49127e-11	1.47578e-11	1.46059e-11	1.31573e-11	1.3166e-11	1.30951e-11	1.30907e-11
15.5	1.49169e-11	1.47594e-11	1.46058e-11	1.31525e-11	1.31626e-11	1.31006e-11	1.30935e-11
15.52	1.49183e-11	1.47561e-11	1.46023e-11	1.31543e-11	1.31638e-11	1.30949e-11	1.30997e-11
15.54	1.49117e-11	1.47586e-11	1.4603e-11	1.31561e-11	1.31651e-11	1.3091e-11	1.30993e-11
15.56	1.49163e-11	1.47558e-11	1.46056e-11	1.31607e-11	1.3164e-11	1.30993e-11	1.31075e-11
15.58	1.49169e-11	1.47589e-11	1.46043e-11	1.31479e-11	1.31656e-11	1.30986e-11	1.31107e-11
15.6	1.49139e-11	1.47598e-11	1.46049e-11	1.3157e-11	1.31643e-11	1.3097e-11	1.31093e-11
15.62	1.49143e-11	1.47566e-11	1.46031e-11	1.31532e-11	1.31716e-11	1.30958e-11	1.31134e-11
15.64	1.49181e-11	1.47605e-11	1.46055e-11	1.31513e-11	1.31695e-11	1.30955e-11	1.31145e-11
15.66	1.49143e-11	1.47569e-11	1.46033e-11	1.31553e-11	1.31621e-11	1.30982e-11	1.31171e-11
15.68	1.4918e-11	1.4759e-11	1.46019e-11	1.31523e-11	1.31662e-11	1.30976e-11	1.31165e-11
15.7	1.49126e-11	1.47553e-11	1.45991e-11	1.31519e-11	1.31668e-11	1.30993e-11	1.31191e-11
15.72	1.49156e-11	1.47575e-11	1.46036e-11	1.31516e-11	1.31708e-11	1.30987e-11	1.31181e-11
15.74	1.4911e-11	1.47595e-11	1.46028e-11	1.31536e-11	1.31647e-11	1.30959e-11	1.31176e-11
15.76	1.49084e-11	1.47632e-11	1.46056e-11	1.31508e-11	1.31669e-11	1.30999e-11	1.31207e-11
15.78	1.49178e-11	1.47585e-11	1.46076e-11	1.31535e-11	1.31632e-11	1.30893e-11	1.31206e-11
15.8	1.49149e-11	1.47556e-11	1.46071e-11	1.31553e-11	1.31649e-11	1.30919e-11	1.31259e-11
15.82	1.49116e-11	1.47565e-11	1.46032e-11	1.3152e-11	1.31639e-11	1.30893e-11	1.31251e-11
15.84	1.49166e-11	1.47656e-11	1.46048e-11	1.31545e-11	1.3158e-11	1.30905e-11	1.31264e-11
15.86	1.49093e-11	1.47588e-11	1.46039e-11	1.31513e-11	1.31646e-11	1.30924e-11	1.3126e-11
15.88	1.49167e-11	1.47617e-11	1.46037e-11	1.31466e-11	1.31672e-11	1.30917e-11	1.31232e-11
15.9	1.4912e-11	1.47637e-11	1.46017e-11	1.31536e-11	1.31676e-11	1.30917e-11	1.31303e-11
15.92	1.4912e-11	1.47604e-11	1.46007e-11	1.31553e-11	1.31626e-11	1.30949e-11	1.3125e-11
15.94	1.49133e-11	1.47649e-11	1.45992e-11	1.31509e-11	1.31684e-11	1.30941e-11	1.31296e-11
15.96	1.49153e-11	1.47631e-11	1.46009e-11	1.31459e-11	1.31658e-11	1.30928e-11	1.31284e-11
15.98	1.49112e-11	1.47586e-11	1.46013e-11	1.31535e-11	1.31669e-11	1.30894e-11	1.31284e-11
16	1.49129e-11	1.47531e-11	1.46011e-11	1.31491e-11	1.31627e-11	1.30955e-11	1.31187e-11
16.02	1.49146e-11	1.47598e-11	1.46037e-11	1.31482e-11	1.31642e-11	1.30938e-11	1.31284e-11
16.04	1.49096e-11	1.47626e-11	1.46039e-11	1.31458e-11	1.31673e-11	1.30923e-11	1.31293e-11
16.06	1.49092e-11	1.47608e-11	1.46017e-11	1.31463e-11	1.31657e-11	1.30967e-11	1.31309e-11
16.08	1.49075e-11	1.47639e-11	1.45979e-11	1.31468e-11	1.31625e-11	1.30923e-11	1.31282e-11
16.1	1.49094e-11	1.47629e-11	1.46022e-11	1.3148e-11	1.31619e-11	1.30976e-11	1.31313e-11
16.12	1.49123e-11	1.4757e-11	1.45908e-11	1.31443e-11	1.31623e-11	1.30932e-11	1.31257e-11
16.14	1.49118e-11	1.47587e-11	1.46014e-11	1.31502e-11	1.31654e-11	1.30978e-11	1.313e-11
16.16	1.49112e-11	1.47715e-11	1.45992e-11	1.31492e-11	1.3161e-11	1.30918e-11	1.31279e-11
16.18	1.49115e-11	1.47631e-11	1.46129e-11	1.31502e-11	1.31634e-11	1.30928e-11	1.31288e-11
16.2	1.49162e-11	1.4758e-11	1.46438e-11	1.31473e-11	1.31678e-11	1.30944e-11	1.31306e-11
16.22	1.49032e-11	1.47608e-11	1.46625e-11	1.31485e-11	1.31656e-11	1.30948e-11	1.3127e-11
16.24	1.48964e-11	1.47622e-11	1.46936e-11	1.31483e-11	1.31617e-11	1.3099e-11	1.31277e-11
16.26	1.48954e-11	1.47577e-11	1.47152e-11	1.31466e-11	1.31653e-11	1.3091e-11	1.31259e-11
16.28	1.48887e-11	1.47563e-11	1.47408e-11	1.31461e-11	1.31633e-11	1.30969e-11	1.31232e-11
16.3	1.48907e-11	1.47538e-11	1.47586e-11	1.31397e-11	1.31601e-11	1.30897e-11	1.31261e-11
16.32	1.489e-11	1.47564e-11	1.47707e-11	1.31477e-11	1.31646e-11	1.30974e-11	1.3129e-11
16.34	1.48853e-11	1.47522e-11	1.47886e-11	1.31477e-11	1.31666e-11	1.30965e-11	1.31265e-11
16.36	1.48895e-11	1.4755e-11	1.47961e-11	1.3147e-11	1.31633e-11	1.30981e-11	1.31351e-11
16.38	1.489e-11	1.47568e-11	1.47915e-11	1.31461e-11	1.31655e-11	1.30972e-11	1.3129e-11
16.4	1.48907e-11	1.47601e-11	1.47962e-11	1.31453e-11	1.31619e-11	1.30935e-11	1.31269e-11
16.42	1.48833e-11	1.47719e-11	1.4798e-11	1.31505e-11	1.31649e-11	1.30966e-11	1.31254e-11
16.44	1.4886e-11	1.47781e-11	1.47957e-11	1.31512e-11	1.3165e-11	1.30893e-11	1.31245e-11
16.46	1.48833e-11	1.47857e-11	1.47961e-11	1.31542e-11	1.31677e-11	1.30905e-11	1.31254e-11
16.48	1.48802e-11	1.48023e-11	1.47871e-11	1.31517e-11	1.31652e-11	1.31013e-11	1.31316e-11
16.5	1.4877e-11	1.48149e-11	1.47823e-11	1.31493e-11	1.31688e-11	1.30949e-11	1.31287e-11
16.52	1.48795e-11	1.48329e-11	1.47827e-11	1.31508e-11	1.31659e-11	1.30956e-11	1.31239e-11
16.54	1.48748e-11	1.48434e-11	1.47831e-11	1.31474e-11	1.3166e-11	1.31006e-11	1.31284e-11
16.56	1.48758e-11	1.48561e-11	1.47761e-11	1.31478e-11	1.31672e-11	1.31014e-11	1.31291e-11
16.58	1.48742e-11	1.48638e-11	1.47803e-11	1.31538e-11	1.31652e-11	1.30917e-11	1.31202e-11
16.6	1.48758e-11	1.48828e-11	1.47792e-11	1.3143e-11	1.31646e-11	1.30957e-11	1.31248e-11
16.62	1.48678e-11	1.48932e-11	1.47786e-11	1.31516e-11	1.31684e-11	1.30953e-11	1.31365e-11
16.64	1.48728e-11	1.48987e-11	1.47771e-11	1.3149e-11	1.3166e-11	1.30929e-11	1.31299e-11
16.66	1.48734e-11	1.49116e-11	1.47808e-11	1.31448e-11	1.31685e-11	1.30986e-11	1.31277e-11
16.68	1.48733e-11	1.49188e-11	1.4786e-11	1.3152e-11	1.31638e-11	1.31085e-11	1.31298e-11
16.7	1.48745e-11	1.49203e-11	1.47905e-11	1.31515e-11	1.31712e-11	1.31252e-11	1.31277e-11
16.72	1.48696e-11	1.49321e-11	1.47954e-11	1.31479e-11	1.31629e-11	1.31314e-11	1.31288e-11
16.74	1.48732e-11	1.49356e-11	1.47967e-11	1.31453e-11	1.31708e-11	1.31506e-11	1.31305e-11
16.76	1.48711e-11	1.49457e-11	1.48054e-11	1.31522e-11	1.31679e-11	1.31571e-11	1.31266e-11
16.78	1.48691e-11	1.49495e-11	1.48153e-11	1.31478e-11	1.31686e-11	1.31654e-11	1.31333e-11
16.8	1.4869e-11	1.49524e-11	1.48226e-11	1.31505e-11	1.31676e-11	1.31731e-11	1.31297e-11
16.82	1.48652e-11	1.49513e-11	1.4834e-11	1.31458e-11	1.31653e-11	1.31775e-11	1.31291e-11
16.84	1.4864e-11	1.49581e-11	1.48344e-11	1.31477e-11	1.31713e-11	1.31801e-11	1.31286e-11
16.86	1.48658e-11	1.49643e-11	1.48404e-11	1.31435e-11	1.31702e-11	1.31816e-11	1.31315e-11
16.88	1.48631e-11	1.49694e-11	1.48499e-11	1.31538e-11	1.31714e-11	1.31838e-11	1.31247e-11
16.9	1.48658e-11	1.49696e-11	1.48502e-11	1.31487e-11	1.31683e-11	1.31947e-11	1.31303e-11
16.92	1.48601e-11	1.49742e-11	1.48562e-11	1.31459e-11	1.3169e-11	1.31937e-11	1.31279e-11
16.94	1.48631e-11	1.49783e-11	1.48621e-11	1.3148e-11	1.31713e-11	1.31983e-11	1.31249e-11
16.96	1.48642e-11	1.49773e-11	1.48594e-11	1.31451e-11	1.31708e-11	1.31924e-11	1.31285e-11
16.98	1.48577e-11	1.4974e-11	1.48608e-11	1.31468e-11	1.31725e-11	1.31964e-11	1.31264e-11
17	1.486e-11	1.49777e-11	1.48665e-11	1.3149e-11	1.31774e-11	1.31976e-11	1.31216e-11
17.02	1.48569e-11	1.49839e-11	1.48674e-11	1.31485e-11	1.31834e-11	1.32003e-11	1.31301e-11
17.04	1.4858e-11	1.49799e-11	1.48716e-11	1.31505e-11	1.31927e-11	1.31983e-11	1.31268e-11
17.06	1.48617e-11	1.4979e-11	1.48755e-11	1.31507e-11	1.32001e-11	1.32013e-11	1.31227e-11
17.08	1.48657e-11	1.49789e-11	1.48731e-11	1.31503e-11	1.32173e-11	1.32046e-11	1.31304e-11
17.1	1.48562e-11	1.49778e-11	1.48785e-11	1.31513e-11	1.32237e-11	1.32039e-11	1.31308e-11
17.12	1.48561e-11	1.49772e-11	1.48776e-11	1.31516e-11	1.32295e-11	1.32026e-11	1.31275e-11
17.14	1.48514e-11	1.49814e-11	1.48769e-11	1.31525e-11	1.32416e-11	1.32051e-11	1.31301e-11
17.16	1.48468e-11	1.49833e-11	1.48788e-11	1.31545e-11	1.32557e-11	1.32077e-11	1.31258e-11
17.18	1.48539e-11	1.4976e-11	1.48845e-11	1.316e-11	1.32652e-11	1.32046e-11	1.31276e-11
17.2	1.48522e-11	1.49343e-11	1.48776e-11	1.31622e-11	1.32715e-11	1.32034e-11	1.31285e-11
17.22	1.48531e-11	1.49285e-11	1.4887e-11	1.31606e-11	1.3279e-11	1.32068e-11	1.31233e-11
17.24	1.48453e-11	1.4931e-11	1.48864e-11	1.31698e-11	1.32778e-11	1.32047e-11	1.3127e-11
17.26	1.48482e-11	1.49322e-11	1.48845e-11	1.31702e-11	1.32888e-11	1.32051e-11	1.31254e-11
17.28	1.48497e-11	1.49336e-11	1.48577e-11	1.31769e-11	1.32853e-11	1.32071e-11	1.31222e-11
17.3	1.48508e-11	1.49349e-11	1.48534e-11	1.31802e-11	1.3292e-11	1.32027e-11	1.31247e-11
17.32	1.48462e-11	1.4937e-11	1.48556e-11	1.319e-11	1.32881e-11	1.32088e-11	1.31266e-11
17.34	1.48449e-11	1.49403e-11	1.48584e-11	1.31947e-11	1.32951e-11	1.32063e-11	1.3123e-11
17.36	1.48415e-11	1.49334e-11	1.4856e-11	1.31999e-11	1.32979e-11	1.32049e-11	1.31358e-11
17.38	1.48444e-11	1.49455e-11	1.4857e-11	1.32018e-11	1.32926e-11	1.32096e-11	1.31317e-11
17.4	1.48492e-11	1.49385e-11	1.48589e-11	1.32102e-11	1.33008e-11	1.32032e-11	1.31272e-11
17.42	1.48501e-11	1.49375e-11	1.4857e-11	1.32196e-11	1.32979e-11	1.32084e-11	1.31326e-11
17.44	1.48508e-11	1.49361e-11	1.48555e-11	1.32228e-11	1.32973e-11	1.32075e-11	1.31264e-11
17.46	1.48523e-11	1.49321e-11	1.48564e-11	1.32253e-11	1.32995e-11	1.32074e-11	1.31293e-11
17.48	1.48579e-11	1.49387e-11	1.48525e-11	1.32321e-11	1.33017e-11	1.32053e-11	1.31329e-11
17.5	1.48551e-11	1.4935e-11	1.48522e-11	1.32421e-11	1.32994e-11	1.32078e-11	1.31296e-11
17.52	1.48547e-11	1.4935e-11	1.48474e-11	1.32371e-11	1.33019e-11	1.32091e-11	1.3129e-11
17.54	1.48567e-11	1.49361e-11	1.48517e-11	1.3245e-11	1.33012e-11	1.32084e-11	1.31267e-11
17.56	1.4852e-11	1.49381e-11	1.4843e-11	1.32455e-11	1.33017e-11	1.32097e-11	1.31325e-11
17.58	1.4858e-11	1.49368e-11	1.48487e-11	1.32518e-11	1.32986e-11	1.32051e-11	1.31296e-11
17.6	1.48503e-11	1.49387e-11	1.48423e-11	1.32556e-11	1.32978e-11	1.32071e-11	1.31283e-11
17.62	1.48556e-11	1.49392e-11	1.48418e-11	1.32604e-11	1.32975e-11	1.32041e-11	1.31301e-11
17.64	1.4858e-11	1.49374e-11	1.48453e-11	1.326e-11	1.3299e-11	1.32053e-11	1.31299e-11
17.66	1.48542e-11	1.49348e-11	1.48462e-11	1.32583e-11	1.32979e-11	1.32071e-11	1.3132e-11
17.68	1.48561e-11	1.49343e-11	1.48426e-11	1.32579e-11	1.32966e-11	1.32076e-11	1.3126e-11
17.7	1.48529e-11	1.49368e-11	1.48341e-11	1.32654e-11	1.33037e-11	1.3207e-11	1.31323e-11
17.72	1.48561e-11	1.4938e-11	1.48416e-11	1.32652e-11	1.33003e-11	1.32107e-11	1.31327e-11
17.74	1.48539e-11	1.49342e-11	1.48295e-11	1.32675e-11	1.32975e-11	1.32124e-11	1.31284e-11
17.76	1.48557e-11	1.49373e-11	1.48331e-11	1.32677e-11	1.32941e-11	1.32127e-11	1.31294e-11
17.78	1.48593e-11	1.49365e-11	1.48286e-11	1.32677e-11	1.32973e-11	1.32045e-11	1.3129e-11
17.8	1.48549e-11	1.49395e-11	1.48247e-11	1.32725e-11	1.32959e-11	1.32056e-11	1.31288e-11
17.82	1.4865e-11	1.49352e-11	1.48248e-11	1.327e-11	1.32944e-11	1.32054e-11	1.31296e-11
17.84	1.48647e-11	1.49367e-11	1.48223e-11	1.32777e-11	1.3296e-11	1.32064e-11	1.31276e-11
17.86	1.48643e-11	1.49358e-11	1.482e-11	1.32779e-11	1.3285e-11	1.32054e-11	1.31325e-11
17.88	1.48622e-11	1.49374e-11	1.48207e-11	1.32787e-11	1.3291e-11	1.32083e-11	1.31341e-11
17.9	1.48621e-11	1.49367e-11	1.48161e-11	1.3278e-11	1.32954e-11	1.32109e-11	1.31335e-11
17.92	1.48671e-11	1.49377e-11	1.48188e-11	1.32743e-11	1.32971e-11	1.32065e-11	1.3125e-11
17.94	1.48649e-11	1.49449e-11	1.48222e-11	1.32762e-11	1.32946e-11	1.32107e-11	1.31302e-11
17.96	1.48631e-11	1.4937e-11	1.4817e-11	1.32866e-11	1.32922e-11	1.32068e-11	1.31302e-11
17.98	1.48598e-11	1.49403e-11	1.48209e-11	1.32812e-11	1.32937e-11	1.32112e-11	1.31339e-11
18	1.48633e-11	1.49377e-11	1.48148e-11	1.32811e-11	1.3294e-11	1.32096e-11	1.31323e-11
18.02	1.48615e-11	1.49411e-11	1.48193e-11	1.3286e-11	1.3292e-11	1.32062e-11	1.31311e-11
18.04	1.48637e-11	1.49413e-11	1.48193e-11	1.32826e-11	1.3295e-11	1.32091e-11	1.31337e-11
18.06	1.48661e-11	1.49437e-11	1.48171e-11	1.32868e-11	1.32922e-11	1.32051e-11	1.31326e-11
18.08	1.48651e-11	1.49439e-11	1.48124e-11	1.32807e-11	1.32904e-11	1.32093e-11	1.31303e-11
18.1	1.4861e-11	1.49361e-11	1.48168e-11	1.32749e-11	1.32907e-11	1.32039e-11	1.31316e-11
18.12	1.4866e-11	1.49402e-11	1.48168e-11	1.32759e-11	1.32976e-11	1.32111e-11	1.31294e-11
18.14	1.4869e-11	1.49392e-11	1.48118e-11	1.32793e-11	1.32934e-11	1.32085e-11	1.31344e-11
18.16	1.48724e-11	1.49358e-11	1.48133e-11	1.32766e-11	1.3286e-11	1.32069e-11	1.31338e-11
18.18	1.48699e-11	1.4934e-11	1.48157e-11	1.32792e-11	1.32886e-11	1.32107e-11	1.31309e-11
18.2	1.48746e-11	1.49395e-11	1.48162e-11	1.32782e-11	1.32878e-11	1.32132e-11	1.31291e-11
18.22	1.48706e-11	1.49436e-11	1.48121e-11	1.32793e-11	1.32856e-11	1.32009e-11	1.31342e-11
18.24	1.48728e-11	1.49387e-11	1.48109e-11	1.32754e-11	1.32852e-11	1.3209e-11	1.3132e-11
18.26	1.48681e-11	1.49371e-11	1.48131e-11	1.32737e-11	1.32905e-11	1.32097e-11	1.31346e-11
18.28	1.48684e-11	1.49343e-11	1.48092e-11	1.32775e-11	1.32873e-11	1.32123e-11	1.31313e-11
18.3	1.48741e-11	1.49375e-11	1.48135e-11	1.32718e-11	1.32868e-11	1.32097e-11	1.31337e-11
18.32	1.48727e-11	1.49379e-11	1.48134e-11	1.3273e-11	1.32848e-11	1.32107e-11	1.31329e-11
18.34	1.48777e-11	1.49426e-11	1.48114e-11	1.3277e-11	1.32857e-11	1.32065e-11	1.31302e-11
18.36	1.48772e-11	1.49433e-11	1.48104e-11	1.32738e-11	1.32896e-11	1.32065e-11	1.31285e-11
18.38	1.48741e-11	1.49426e-11	1.48114e-11	1.32792e-11	1.3282e-11	1.32099e-11	1.31382e-11
18.4	1.48765e-11	1.49426e-11	1.48095e-11	1.32752e-11	1.32861e-11	1.321e-11	1.31325e-11
18.42	1.48839e-11	1.49443e-11	1.48106e-11	1.32752e-11	1.32867e-11	1.32064e-11	1.31368e-11
18.44	1.48784e-11	1.49462e-11	1.48085e-11	1.32689e-11	1.32847e-11	1.3208e-11	1.31345e-11
18.46	1.48887e-11	1.49515e-11	1.48117e-11	1.32738e-11	1.32821e-11	1.32086e-11	1.31339e-11
18.48	1.4889e-11	1.49485e-11	1.4817e-11	1.32712e-11	1.32827e-11	1.32101e-11	1.3134e-11
18.5	1.48924e-11	1.49466e-11	1.48194e-11	1.32633e-11	1.32869e-11	1.32083e-11	1.3134e-11
18.52	1.48916e-11	1.49472e-11	1.48115e-11	1.32637e-11	1.32829e-11	1.32052e-11	1.31298e-11
18.54	1.48906e-11	1.49448e-11	1.48173e-11	1.32664e-11	1.32822e-11	1.32074e-11	1.31361e-11
18.56	1.48876e-11	1.49491e-11	1.48154e-11	1.32661e-11	1.32819e-11	1.32119e-11	1.31333e-11
18.58	1.48925e-11	1.49494e-11	1.48173e-11	1.32656e-11	1.32822e-11	1.32082e-11	1.3129e-11
18.6	1.48967e-11	1.49412e-11	1.48162e-11	1.3265e-11	1.32826e-11	1.32134e-11	1.31331e-11
18.62	1.48961e-11	1.49453e-11	1.48196e-11	1.32663e-11	1.32857e-11	1.32105e-11	1.31322e-11
18.64	1.4901e-11	1.49508e-11	1.48222e-11	1.32677e-11	1.32824e-11	1.32086e-11	1.31316e-11
18.66	1.48942e-11	1.49441e-11	1.48225e-11	1.32644e-11	1.32837e-11	1.32137e-11	1.31378e-11
18.68	1.49009e-11	1.49494e-11	1.4821e-11	1.32658e-11	1.32818e-11	1.32087e-11	1.31391e-11
18.7	1.49044e-11	1.49516e-11	1.48193e-11	1.32651e-11	1.32831e-11	1.32109e-11	1.31318e-11
18.72	1.49038e-11	1.49467e-11	1.48205e-11	1.3262e-11	1.32838e-11	1.32089e-11	1.31382e-11
18.74	1.48997e-11	1.49477e-11	1.48221e-11	1.32643e-11	1.32799e-11	1.32121e-11	1.31375e-11
18.76	1.49018e-11	1.49448e-11	1.48203e-11	1.32635e-11	1.32822e-11	1.3211e-11	1.31393e-11
18.78	1.48987e-11	1.49432e-11	1.4825e-11	1.32582e-11	1.32858e-11	1.32105e-11	1.31345e-11
18.8	1.49006e-11	1.49471e-11	1.48266e-11	1.32608e-11	1.32821e-11	1.32183e-11	1.31359e-11
18.82	1.4901e-11	1.49445e-11	1.48225e-11	1.32585e-11	1.32809e-11	1.32143e-11	1.31321e-11
18.84	1.49064e-11	1.49542e-11	1.48251e-11	1.32615e-11	1.32802e-11	1.32133e-11	1.31345e-11
18.86	1.49002e-11	1.49514e-11	1.48198e-11	1.32621e-11	1.32837e-11	1.32133e-11	1.31324e-11
18.88	1.49041e-11	1.49514e-11	1.48251e-11	1.32601e-11	1.32795e-11	1.32087e-11	1.31307e-11
18.9	1.49083e-11	1.49457e-11	1.48213e-11	1.32597e-11	1.32813e-11	1.32075e-11	1.31388e-11
18.92	1.4902e-11	1.4947e-11	1.48298e-11	1.32589e-11	1.32814e-11	1.32081e-11	1.3134e-11
18.94	1.49051e-11	1.49494e-11	1.48275e-11	1.32576e-11	1.32774e-11	1.32105e-11	1.31382e-11
18.96	1.49075e-11	1.49521e-11	1.4824e-11	1.32587e-11	1.32826e-11	1.32114e-11	1.3136e-11
18.98	1.49126e-11	1.49493e-11	1.48311e-11	1.32608e-11	1.32822e-11	1.32097e-11	1.31372e-11
19	1.4911e-11	1.49449e-11	1.48286e-11	1.32544e-11	1.32805e-11	1.32147e-11	1.31341e-11
19.02	1.49132e-11	1.4946e-11	1.48358e-11	1.32627e-11	1.32816e-11	1.32123e-11	1.31416e-11
19.04	1.49148e-11	1.49452e-11	1.48326e-11	1.32576e-11	1.32769e-11	1.32148e-11
19.06	1.49152e-11	1.49459e-11	1.48332e-11	1.32594e-11	1.32754e-11	1.32114e-11
19.08	1.49149e-11	1.49511e-11	1.48344e-11	1.32618e-11	1.32777e-11	1.32127e-11
19.1	1.49171e-11	1.4947e-11	1.48359e-11	1.32519e-11	1.32768e-11	1.32133e-11
19.12	1.49141e-11	1.49486e-11	1.4839e-11	1.32593e-11	1.32795e-11	1.32127e-11
19.14	1.4919e-11	1.49478e-11	1.48357e-11	1.32534e-11	1.32815e-11	1.32065e-11
19.16	1.49187e-11	1.4948e-11	1.48382e-11	1.32535e-11	1.32781e-11	1.32095e-11
19.18	1.4925e-11	1.49454e-11	1.48459e-11	1.32551e-11	1.32783e-11	1.32126e-11
19.2	1.49262e-11	1.49476e-11	1.48378e-11	1.32578e-11	1.32769e-11	1.32099e-11
19.22	1.49287e-11	1.49451e-11	1.48449e-11	1.32616e-11	1.32763e-11	1.32152e-11
19.24	1.49254e-11	1.49423e-11	1.4846e-11	1.32581e-11	1.32714e-11	1.32115e-11
19.26	1.49218e-11	1.49428e-11	1.48486e-11	1.32581e-11	1.32786e-11	1.32085e-11
19.28	1.4929e-11	1.49442e-11	1.48493e-11	1.3259e-11	1.32794e-11	1.32116e-11
19.3	1.49282e-11	1.49418e-11	1.48463e-11	1.32591e-11	1.3275e-11	1.32132e-11
19.32	1.49351e-11	1.49501e-11	1.48427e-11	1.32623e-11	1.32728e-11	1.32141e-11
19.34	1.49316e-11	1.49453e-11	1.48451e-11	1.3266e-11	1.32776e-11	1.32117e-11
19.36	1.49315e-11	1.49417e-11	1.48507e-11	1.3262e-11	1.32764e-11	1.32159e-11
19.38	1.49392e-11	1.49418e-11	1.48466e-11	1.32621e-11	1.32747e-11	1.32145e-11
19.4	1.49363e-11	1.49417e-11	1.48456e-11	1.32587e-11	1.32792e-11	1.3214e-11
19.42	1.49405e-11	1.49485e-11	1.48476e-11	1.32591e-11	1.32756e-11	1.32119e-11
19.44	1.49436e-11	1.49483e-11	1.48479e-11	1.32619e-11	1.32798e-11	1.32115e-11
19.46	1.49437e-11	1.49513e-11	1.48495e-11	1.32617e-11	1.32773e-11	1.32128e-11
19.48	1.49421e-11	1.49513e-11	1.48506e-11	1.32618e-11	1.32763e-11	1.32148e-11
19.5	1.49484e-11	1.49529e-11	1.48484e-11	1.32655e-11	1.32776e-11	1.32118e-11
19.52	1.49466e-11	1.49541e-11	1.48475e-11	1.32617e-11	1.32786e-11	1.32149e-11
19.54	1.49515e-11	1.49463e-11	1.48513e-11	1.32616e-11	1.32728e-11	1.32127e-11
19.56	1.49474e-11	1.49501e-11	1.4849e-11	1.32672e-11	1.32755e-11	1.32137e-11
19.58	1.49489e-11	1.49532e-11	1.48475e-11	1.32632e-11	1.32725e-11	1.32129e-11
19.6	1.49521e-11	1.49498e-11	1.48489e-11	1.32681e-11	1.32777e-11	1.32105e-11
19.62	1.4955e-11	1.49499e-11	1.48498e-11	1.32672e-11	1.32782e-11	1.32127e-11
19.64	1.4957e-11	1.49505e-11	1.48523e-11	1.32662e-11	1.32761e-11	1.3214e-11
19.66	1.49544e-11	1.49527e-11	1.4849e-11	1.32661e-11	1.32808e-11	1.3216e-11
19.68	1.49584e-11	1.49464e-11	1.4851e-11	1.32699e-11	1.32786e-11	1.32114e-11
19.7	1.49618e-11	1.49534e-11	1.48511e-11	1.32693e-11	1.3282e-11	1.32133e-11
19.72	1.49596e-11	1.4953e-11	1.48505e-11	1.32689e-11	1.32764e-11	1.32131e-11
19.74	1.49588e-11	1.49517e-11	1.48533e-11	1.32667e-11	1.32764e-11	1.32146e-11
19.76	1.49606e-11	1.49556e-11	1.48543e-11	1.32718e-11	1.32728e-11	1.32135e-11
19.78	1.497e-11	1.4953e-11	1.48507e-11	1.32674e-11	1.32737e-11	1.32136e-11
19.8	1.49644e-11	1.49539e-11	1.48545e-11	1.32713e-11	1.32757e-11	1.32187e-11
19.82	1.49667e-11	1.49551e-11	1.48533e-11	1.32699e-11	1.32687e-11	1.3215e-11
19.84	1.49728e-11	1.49561e-11	1.4852e-11	1.32695e-11	1.327e-11	1.32141e-11
19.86	1.49706e-11	1.49533e-11	1.48568e-11	1.32714e-11	1.32718e-11	1.32175e-11
19.88	1.49698e-11	1.49525e-11	1.48522e-11	1.32731e-11	1.32766e-11	1.32141e-11
19.9	1.49706e-11	1.49548e-11	1.48454e-11	1.32731e-11	1.3274e-11	1.32157e-11
19.92	1.49716e-11	1.49497e-11	1.4853e-11	1.3275e-11	1.32751e-11	1.32082e-11
19.94	1.49722e-11	1.49488e-11	1.48543e-11	1.32714e-11	1.32744e-11	1.32183e-11
19.96	1.4972e-11	1.49539e-11	1.48547e-11	1.32784e-11	1.32729e-11	1.32152e-11
19.98	1.49771e-11	1.4953e-11	1.48557e-11	1.32768e-11	1.32764e-11	1.32173e-11
20	1.49788e-11	1.4953e-11	1.48574e-11	1.32755e-11	1.32761e-11	1.32147e-11
20.02	1.49783e-11	1.49506e-11	1.48551e-11	1.32765e-11	1.32721e-11	1.32137e-11
20.04	1.49782e-11	1.49572e-11	1.48517e-11	1.32787e-11	1.32754e-11	1.32184e-11
20.06	1.49847e-11	1.49549e-11	1.48579e-11	1.32779e-11	1.32749e-11	1.32117e-11
20.08	1.49865e-11	1.49565e-11	1.48581e-11	1.32751e-11	1.32748e-11	1.32144e-11
20.1	1.49876e-11	1.49544e-11	1.48562e-11	1.32786e-11	1.3273e-11	1.32144e-11
20.12	1.49828e-11	1.49601e-11	1.48595e-11	1.32785e-11	1.32706e-11	1.32122e-11
20.14	1.49846e-11	1.49595e-11	1.48535e-11	1.32777e-11	1.327e-11	1.3217e-11
20.16	1.49883e-11	1.49593e-11	1.48587e-11	1.32762e-11	1.32742e-11	1.3217e-11
20.18	1.49907e-11	1.49585e-11	1.48595e-11	1.32836e-11	1.32728e-11	1.32147e-11
20.2	1.49937e-11	1.49566e-11	1.48582e-11	1.3285e-11	1.32728e-11	1.32105e-11
20.22	1.49981e-11	1.49593e-11	1.48616e-11	1.32811e-11	1.32738e-11	1.32173e-11
20.24	1.49925e-11	1.49607e-11	1.48566e-11	1.32789e-11	1.32764e-11	1.32134e-11
20.26	1.49901e-11	1.4958e-11	1.48561e-11	1.32812e-11	1.32704e-11	1.32197e-11
20.28	1.49885e-11	1.49548e-11	1.4859e-11	1.32795e-11	1.32716e-11	1.32212e-11
20.3	1.49955e-11	1.49601e-11	1.48627e-11	1.3287e-11	1.32729e-11	1.322e-11
20.32	1.49958e-11	1.49642e-11	1.48646e-11	1.32857e-11	1.32716e-11	1.32168e-11
20.34	1.49955e-11	1.49645e-11	1.48633e-11	1.32841e-11	1.32765e-11	1.32209e-11
20.36	1.49988e-11	1.49663e-11	1.48658e-11	1.32857e-11	1.32743e-11	1.32242e-11
20.38	1.50026e-11	1.49608e-11	1.48601e-11	1.32868e-11	1.32738e-11	1.32238e-11
20.4	1.50055e-11	1.49648e-11	1.48622e-11	1.32867e-11	1.32717e-11	1.3218e-11
20.42	1.49976e-11	1.49631e-11	1.48699e-11	1.32891e-11	1.3272e-11	1.32176e-11
20.44	1.50008e-11	1.4964e-11	1.48651e-11	1.32881e-11	1.32745e-11	1.32181e-11
20.46	1.50035e-11	1.49635e-11	1.48658e-11	1.32846e-11	1.32708e-11	1.32185e-11
20.48	1.5002e-11	1.49653e-11	1.48649e-11	1.32885e-11	1.32781e-11	1.32172e-11
20.5	1.50059e-11	1.49622e-11	1.48666e-11	1.32933e-11	1.3275e-11	1.32187e-11
20.52	1.50054e-11	1.49612e-11	1.48693e-11	1.32924e-11	1.32718e-11	1.32205e-11
20.54	1.50055e-11	1.49643e-11	1.4867e-11	1.32935e-11	1.32793e-11	1.32166e-11
20.56	1.50155e-11	1.4961e-11	1.48666e-11	1.32872e-11	1.32715e-11	1.32169e-11
20.58	1.50142e-11	1.49628e-11	1.48655e-11	1.32886e-11	1.32722e-11	1.322e-11
20.6	1.50175e-11	1.49612e-11	1.48651e-11	1.3294e-11	1.32699e-11	1.32226e-11
20.62	1.5021e-11	1.49572e-11	1.48652e-11	1.32916e-11	1.32737e-11	1.3219e-11
20.64	1.50153e-11	1.4965e-11	1.48657e-11	1.32889e-11	1.32697e-11	1.32184e-11
20.66	1.50131e-11	1.49654e-11	1.48654e-11	1.32873e-11	1.32719e-11	1.32121e-11
20.68	1.50173e-11	1.49688e-11	1.48662e-11	1.32923e-11	1.32758e-11	1.32223e-11
20.7	1.50091e-11	1.49617e-11	1.48695e-11	1.32915e-11	1.32732e-11	1.32229e-11
20.72	1.50151e-11	1.4968e-11	1.48692e-11	1.32946e-11	1.32715e-11	1.32201e-11
20.74	1.50269e-11	1.49658e-11	1.48716e-11	1.32931e-11	1.32715e-11	1.32199e-11
20.76	1.50241e-11	1.4963e-11	1.48692e-11	1.3295e-11	1.32716e-11	1.32137e-11
20.78	1.50246e-11	1.49631e-11	1.487e-11	1.32888e-11	1.32736e-11	1.32177e-11
20.8	1.50269e-11	1.4961e-11	1.4869e-11	1.32936e-11	1.32709e-11	1.32205e-11
20.82	1.50276e-11	1.49673e-11	1.48796e-11	1.32966e-11	1.32718e-11	1.32196e-11
20.84	1.50243e-11	1.49625e-11	1.48766e-11	1.32913e-11	1.32738e-11	1.32251e-11
20.86	1.50333e-11	1.49678e-11	1.48764e-11	1.32946e-11	1.32707e-11	1.32265e-11
20.88	1.50314e-11	1.49654e-11	1.48754e-11	1.32891e-11	1.32693e-11	1.32181e-11
20.9	1.50327e-11	1.49711e-11	1.48805e-11	1.32947e-11	1.32681e-11	1.32196e-11
20.92	1.50264e-11	1.49725e-11	1.48778e-11	1.32938e-11	1.32752e-11	1.32247e-11
20.94	1.50309e-11	1.49689e-11	1.48782e-11	1.32956e-11	1.32758e-11	1.32244e-11
20.96	1.50316e-11	1.49645e-11	1.48827e-11	1.33012e-11	1.32733e-11	1.32238e-11
20.98	1.50366e-11	1.4964e-11	1.48797e-11	1.33013e-11	1.32722e-11	1.32153e-11
21	1.5036e-11	1.49699e-11	1.48783e-11	1.32985e-11	1.32683e-11	1.32215e-11
21.02	1.50308e-11	1.49687e-11	1.48775e-11	1.32968e-11	1.32714e-11	1.32195e-11
21.04	1.50329e-11	1.49643e-11	1.48792e-11	1.32969e-11	1.32671e-11
21.06	1.50395e-11	1.49588e-11	1.48815e-11	1.32986e-11	1.32732e-11
21.08	1.50381e-11	1.49634e-11	1.4879e-11	1.32971e-11	1.32709e-11
21.1	1.50407e-11	1.49671e-11	1.4882e-11	1.33005e-11	1.3273e-11
21.12	1.50398e-11	1.49648e-11	1.48783e-11	1.32977e-11	1.32742e-11
21.14	1.50414e-11	1.49626e-11	1.48734e-11	1.32952e-11	1.3272e-11
21.16	1.50373e-11	1.4961e-11	1.48753e-11	1.33003e-11	1.32755e-11
21.18	1.50403e-11	1.49607e-11	1.48756e-11	1.3303e-11	1.32683e-11
21.2	1.50457e-11	1.49622e-11	1.48716e-11	1.33045e-11	1.32734e-11
21.22	1.5038e-11	1.49701e-11	1.48815e-11	1.3304e-11	1.3275e-11
21.24	1.50414e-11	1.49655e-11	1.48749e-11	1.33005e-11	1.32759e-11
21.26	1.50436e-11	1.4974e-11	1.48728e-11	1.33048e-11	1.32722e-11
21.28	1.5043e-11	1.49641e-11	1.48732e-11	1.32974e-11	1.3275e-11
21.3	1.50448e-11	1.49619e-11	1.48739e-11	1.33022e-11	1.32748e-11
21.32	1.50505e-11	1.49672e-11	1.48797e-11	1.33001e-11	1.32723e-11
21.34	1.50468e-11	1.49664e-11	1.48809e-11	1.33018e-11	1.32731e-11
21.36	1.50518e-11	1.4967e-11	1.4877e-11	1.33071e-11	1.3277e-11
21.38	1.50463e-11	1.49681e-11	1.48769e-11	1.33072e-11	1.32717e-11
21.4	1.50498e-11	1.49642e-11	1.48781e-11	1.33052e-11	1.3272e-11
21.42	1.50531e-11	1.49626e-11	1.48779e-11	1.33042e-11	1.32735e-11
21.44	1.50461e-11	1.49612e-11	1.48791e-11	1.33044e-11	1.32749e-11
21.46	1.50521e-11	1.49593e-11	1.48766e-11	1.33046e-11	1.32715e-11
21.48	1.5052e-11	1.49626e-11	1.48799e-11	1.33057e-11	1.32769e-11
21.5	1.50513e-11	1.49595e-11	1.48825e-11	1.33043e-11	1.32745e-11
21.52	1.50526e-11	1.49588e-11	1.48787e-11	1.33006e-11	1.32718e-11
21.54	1.50508e-11	1.4963e-11	1.48807e-11	1.3308e-11	1.327e-11
21.56	1.50495e-11	1.49611e-11	1.48769e-11	1.33035e-11	1.32737e-11
21.58	1.50471e-11	1.49598e-11	1.48836e-11	1.33073e-11	1.32757e-11
21.6	1.50474e-11	1.49647e-11	1.48822e-11	1.33069e-11	1.32689e-11
21.62	1.50487e-11	1.49613e-11	1.48748e-11	1.33033e-11	1.32728e-11
21.64	1.50476e-11	1.49617e-11	1.48798e-11	1.33091e-11	1.32726e-11
21.66	1.50495e-11	1.49639e-11	1.48819e-11	1.33068e-11	1.32694e-11
21.68	1.50503e-11	1.49672e-11	1.48837e-11	1.33079e-11	1.32746e-11
21.7	1.50499e-11	1.49608e-11	1.4883e-11	1.33033e-11	1.32723e-11
21.72	1.50492e-11	1.49564e-11	1.48836e-11	1.33037e-11	1.32716e-11
21.74	1.50514e-11	1.49599e-11	1.48818e-11	1.33035e-11	1.32701e-11
21.76	1.50565e-11	1.49601e-11	1.48851e-11	1.33091e-11	1.32749e-11
21.78	1.50578e-11	1.49595e-11	1.48797e-11	1.33081e-11	1.32729e-11
21.8	1.5051e-11	1.49578e-11	1.48861e-11	1.33079e-11	1.32729e-11
21.82	1.50526e-11	1.49632e-11	1.48789e-11	1.33088e-11	1.32703e-11
21.84	1.50498e-11	1.49652e-11	1.48792e-11	1.33116e-11	1.32733e-11
21.86	1.5056e-11	1.49574e-11	1.4879e-11	1.33074e-11	1.32717e-11
21.88	1.50606e-11	1.49605e-11	1.48812e-11	1.33087e-11	1.32789e-11
21.9	1.50609e-11	1.49645e-11	1.4878e-11	1.33028e-11	1.32744e-11
21.92	1.50594e-11	1.49622e-11	1.48793e-11	1.33109e-11	1.32723e-11
21.94	1.50593e-11	1.4958e-11	1.4885e-11	1.33033e-11	1.32749e-11
21.96	1.50571e-11	1.49563e-11	1.48788e-11	1.33063e-11	1.32772e-11
21.98	1.50619e-11	1.49619e-11	1.48831e-11	1.33077e-11	1.32726e-11
22	1.50637e-11	1.49609e-11	1.48767e-11	1.33102e-11	1.32753e-11
22.02	1.50628e-11	1.49622e-11	1.4875e-11	1.33081e-11	1.32736e-11
22.04	1.50619e-11	1.49616e-11	1.48772e-11	1.33104e-11	1.32752e-11
22.06	1.50648e-11	1.49616e-11	1.48817e-11	1.33077e-11	1.3271e-11
22.08	1.50643e-11	1.4958e-11	1.48812e-11	1.33053e-11	1.32739e-11
22.1	1.50666e-11	1.49609e-11	1.48826e-11	1.33072e-11	1.32716e-11
22.12	1.50623e-11	1.49595e-11	1.48827e-11	1.33108e-11	1.32774e-11
22.14	1.50677e-11	1.49621e-11	1.48767e-11	1.33078e-11	1.32738e-11
22.16	1.50642e-11	1.49587e-11	1.48829e-11	1.33106e-11	1.32733e-11
22.18	1.50661e-11	1.49593e-11	1.48805e-11	1.33087e-11	1.32761e-11
22.2	1.50649e-11	1.49568e-11	1.48801e-11	1.33075e-11	1.32717e-11
22.22	1.50655e-11	1.49634e-11	1.48828e-11	1.3308e-11	1.32745e-11
22.24	1.50633e-11	1.49676e-11	1.48852e-11	1.33114e-11	1.32741e-11
22.26	1.506e-11	1.49628e-11	1.48844e-11	1.33091e-11	1.32715e-11
22.28	1.50638e-11	1.49622e-11	1.48829e-11	1.33062e-11	1.3278e-11
22.3	1.50621e-11	1.49617e-11	1.48808e-11	1.33166e-11	1.32745e-11
22.32	1.50646e-11	1.49626e-11	1.4881e-11	1.33112e-11	1.32758e-11
22.34	1.50591e-11	1.4965e-11	1.4883e-11	1.33097e-11	1.32739e-11
22.36	1.50591e-11	1.4962e-11	1.48794e-11	1.33126e-11	1.3275e-11
22.38	1.5064e-11	1.49603e-11	1.48817e-11	1.33121e-11	1.32696e-11
22.4	1.50688e-11	1.49651e-11	1.4881e-11	1.33097e-11	1.32705e-11
22.42	1.50633e-11	1.49651e-11	1.48856e-11	1.33066e-11	1.32724e-11
22.44	1.50672e-11	1.49648e-11	1.48848e-11	1.33056e-11	1.32751e-11
22.46	1.50652e-11	1.4961e-11	1.48858e-11	1.33067e-11	1.32722e-11
22.48	1.50669e-11	1.49618e-11	1.48854e-11	1.33098e-11	1.32727e-11
22.5	1.50719e-11	1.49651e-11	1.48853e-11	1.33105e-11	1.32729e-11
22.52	1.50716e-11	1.49629e-11	1.48839e-11	1.33094e-11	1.32777e-11
22.54	1.50727e-11	1.49647e-11	1.48862e-11	1.33141e-11	1.32712e-11
22.56	1.50732e-11	1.49638e-11	1.48864e-11	1.33107e-11	1.32756e-11
22.58	1.50745e-11	1.49668e-11	1.48896e-11	1.33133e-11	1.32764e-11
22.6	1.50766e-11	1.49648e-11	1.4886e-11	1.33106e-11	1.32713e-11
22.62	1.50784e-11	1.49655e-11	1.48837e-11	1.33131e-11	1.32744e-11
22.64	1.50784e-11	1.49632e-11	1.48848e-11	1.33132e-11	1.32775e-11
22.66	1.50779e-11	1.49612e-11	1.48804e-11	1.33154e-11	1.32742e-11
22.68	1.50818e-11	1.49668e-11	1.48792e-11	1.33139e-11	1.32777e-11
22.7	1.50807e-11	1.49627e-11	1.4888e-11	1.33129e-11	1.32751e-11
22.72	1.50794e-11	1.49641e-11	1.4882e-11	1.33096e-11	1.32729e-11
22.74	1.50705e-11	1.49682e-11	1.48848e-11	1.33124e-11	1.32776e-11
22.76	1.50802e-11	1.49658e-11	1.48842e-11	1.33091e-11	1.32733e-11
22.78	1.50826e-11	1.4966e-11	1.48859e-11	1.33152e-11	1.32762e-11
22.8	1.50822e-11	1.49652e-11	1.48833e-11	1.33136e-11	1.32765e-11
22.82	1.50802e-11	1.49653e-11	1.48827e-11	1.33106e-11	1.32726e-11
22.84	1.50782e-11	1.49626e-11	1.48858e-11	1.33136e-11	1.32792e-11
22.86	1.50728e-11	1.49567e-11	1.48841e-11	1.33129e-11	1.32722e-11
22.88	1.50727e-11	1.49632e-11	1.48827e-11	1.33161e-11	1.32725e-11
22.9	1.50664e-11	1.49617e-11	1.4881e-11	1.33192e-11	1.32723e-11
22.92	1.50685e-11	1.4961e-11	1.48821e-11	1.33132e-11	1.32776e-11
22.94	1.50743e-11	1.49632e-11	1.48841e-11	1.33121e-11	1.32762e-11
22.96	1.5071e-11	1.49652e-11	1.48814e-11	1.33129e-11	1.32722e-11
22.98	1.50695e-11	1.49611e-11	1.48848e-11	1.3313e-11	1.32722e-11
23	1.50723e-11	1.49561e-11	1.48791e-11	1.33111e-11	1.32773e-11
23.02	1.50729e-11	1.49585e-11	1.48795e-11	1.33151e-11	1.32748e-11
23.04	1.50677e-11	1.49614e-11	1.48847e-11	1.33128e-11	1.3273e-11
23.06	1.50667e-11	1.49607e-11	1.48828e-11	1.33129e-11	1.32753e-11
23.08	1.50712e-11	1.49685e-11	1.48851e-11	1.33122e-11	1.32767e-11
23.1	1.5072e-11	1.49632e-11	1.48851e-11	1.33097e-11	1.32727e-11
23.12	1.50721e-11	1.49601e-11	1.48848e-11	1.33045e-11	1.32808e-11
23.14	1.50707e-11	1.49649e-11	1.48839e-11	1.33083e-11	1.32734e-11
23.16	1.50739e-11	1.49608e-11	1.48859e-11	1.33088e-11	1.32746e-11
23.18	1.50735e-11	1.49646e-11	1.48863e-11	1.33216e-11	1.32781e-11
23.2	1.50721e-11	1.4959e-11	1.48861e-11	1.33145e-11	1.3274e-11
23.22	1.50732e-11	1.49618e-11	1.48832e-11	1.33122e-11	1.32782e-11
23.24	1.50737e-11		1.4879e-11	1.33173e-11	1.32689e-11
23.26	1.50738e-11		1.48804e-11	1.33124e-11	1.32792e-11
23.28	1.50721e-11		1.48886e-11	1.33156e-11	1.32749e-11
23.3	1.50686e-11		1.48881e-11	1.33127e-11	1.32701e-11
23.32	1.50698e-11		1.48879e-11	1.33155e-11	1.32713e-11
23.34	1.50693e-11		1.48891e-11	1.33185e-11	1.32781e-11
23.36	1.50724e-11		1.48874e-11	1.33113e-11	1.32723e-11
23.38	1.50728e-11		1.48862e-11	1.33159e-11	1.32735e-11
23.4	1.50732e-11		1.48913e-11	1.33142e-11	1.32712e-11
23.42	1.50757e-11		1.48871e-11	1.33136e-11	1.32764e-11
23.44	1.5073e-11		1.48918e-11	1.33186e-11	1.32773e-11
23.46	1.50705e-11		1.48902e-11	1.33142e-11	1.32692e-11
23.48	1.50729e-11		1.48864e-11	1.33124e-11	1.32749e-11
23.5	1.50727e-11		1.48947e-11	1.33098e-11	1.32786e-11
23.52	1.5074e-11		1.48886e-11	1.33159e-11	1.32746e-11
23.54	1.50745e-11		1.48891e-11	1.3316e-11	1.32732e-11
23.56	1.50696e-11		1.48897e-11	1.33105e-11	1.32754e-11
23.58	1.50757e-11		1.48865e-11	1.33119e-11	1.32742e-11
23.6	1.50774e-11		1.4886e-11	1.33174e-11	1.32697e-11
23.62	1.50741e-11		1.48887e-11	1.33169e-11	1.32709e-11
23.64	1.50748e-11		1.4889e-11	1.33177e-11	1.32755e-11
23.66	1.50758e-11		1.48888e-11	1.33196e-11	1.32704e-11
23.68	1.50778e-11		1.48909e-11	1.33112e-11	1.32703e-11
23.7	1.50704e-11		1.48907e-11	1.33165e-11	1.32726e-11
23.72	1.50739e-11		1.48912e-11	1.33205e-11	1.32782e-11
23.74	1.50774e-11		1.489e-11	1.33164e-11	1.32748e-11
23.76	1.50799e-11		1.48891e-11	1.33177e-11	1.32782e-11
23.78	1.5081e-11		1.48861e-11	1.33146e-11	1.32737e-11
23.8	1.5076e-11		1.48874e-11	1.332e-11	1.32768e-11
23.82	1.50845e-11		1.48909e-11	1.33128e-11	1.32748e-11
23.84	1.50792e-11		1.48869e-11	1.33158e-11	1.32744e-11
23.86	1.50808e-11		1.48926e-11	1.33154e-11	1.32711e-11
23.88	1.50781e-11		1.48894e-11	1.33125e-11	1.32737e-11
23.9	1.50826e-11		1.48924e-11	1.33112e-11	1.32746e-11
23.92	1.50788e-11		1.48909e-11	1.33131e-11	1.32714e-11
23.94	1.50744e-11		1.48902e-11	1.33152e-11	1.32773e-11
23.96	1.50781e-11		1.48951e-11	1.33106e-11	1.32736e-11
23.98	1.50776e-11		1.48877e-11	1.33175e-11	1.32781e-11
24	1.50793e-11		1.48888e-11	1.3315e-11	1.32825e-11
24.02	1.50826e-11		1.48857e-11	1.33142e-11	1.32806e-11
24.04	1.50813e-11		1.48875e-11	1.3313e-11
24.06	1.50804e-11		1.48842e-11	1.33126e-11
24.08	1.50775e-11		1.4888e-11	1.33165e-11
24.1	1.50742e-11		1.48848e-11	1.33158e-11
24.12	1.50758e-11		1.48849e-11	1.3314e-11
24.14	1.50798e-11		1.48903e-11	1.3311e-11
24.16	1.50802e-11		1.48871e-11	1.33089e-11
24.18	1.50806e-11		1.48853e-11	1.33169e-11
24.2	1.50818e-11		1.48915e-11	1.33155e-11
24.22	1.50833e-11		1.4892e-11	1.33135e-11
24.24	1.50864e-11		1.4892e-11	1.3309e-11
24.26	1.50838e-11		1.48896e-11	1.33155e-11
24.28	1.50853e-11		1.48883e-11	1.33178e-11
24.3	1.50804e-11		1.48904e-11	1.33144e-11
24.32	1.50864e-11		1.48843e-11	1.33147e-11
24.34	1.50864e-11		1.48864e-11	1.33177e-11
24.36	1.50884e-11		1.48937e-11	1.3317e-11
24.38	1.50935e-11		1.48883e-11	1.33245e-11
24.4	1.50858e-11		1.48864e-11	1.33169e-11
24.42	1.50866e-11		1.48882e-11	1.33151e-11
24.44	1.5084e-11		1.48908e-11	1.33163e-11
24.46	1.50889e-11		1.48853e-11	1.33123e-11
24.48	1.50828e-11		1.4889e-11	1.33127e-11
24.5	1.5079e-11		1.48935e-11	1.33094e-11
24.52	1.50815e-11		1.48904e-11	1.33124e-11
24.54	1.50817e-11		1.48865e-11	1.33121e-11
24.56	1.50807e-11		1.48933e-11	1.33167e-11
24.58	1.50813e-11		1.48881e-11	1.3311e-11
24.6	1.50825e-11		1.48945e-11	1.33142e-11
24.62	1.50796e-11		1.48874e-11	1.33157e-11
24.64	1.50813e-11		1.48904e-11	1.33189e-11
24.66	1.50846e-11		1.48849e-11	1.3311e-11
24.68	1.50822e-11		1.4887e-11	1.33164e-11
24.7	1.50772e-11		1.48885e-11	1.33141e-11
24.72	1.50783e-11		1.48918e-11	1.33173e-11
24.74	1.50782e-11		1.4892e-11	1.33135e-11
24.76	1.50764e-11		1.4889e-11	1.33192e-11
24.78	1.5077e-11		1.48903e-11	1.33195e-11
24.8	1.50772e-11		1.48899e-11	1.33187e-11
24.82	1.50822e-11		1.48868e-11	1.33172e-11
24.84	1.50821e-11		1.48933e-11	1.33129e-11
24.86	1.50814e-11		1.48904e-11	1.33148e-11
24.88	1.5088e-11		1.48945e-11	1.33174e-11
24.9	1.50889e-11		1.48892e-11	1.33159e-11
24.92	1.50869e-11		1.48867e-11	1.3315e-11
24.94	1.509e-11		1.4891e-11	1.33152e-11
24.96	1.50884e-11		1.48881e-11	1.33132e-11
24.98	1.50914e-11		1.48872e-11	1.33161e-11
25	1.5093e-11		1.48907e-11	1.3316e-11
25.02	1.50867e-11		1.48921e-11	1.33157e-11
25.04	1.50935e-11		1.48933e-11	1.33189e-11
25.06	1.5091e-11		1.4889e-11	1.33141e-11
25.08	1.50882e-11		1.48877e-11	1.33166e-11
25.1	1.50881e-11		1.48922e-11	1.33152e-11
25.12	1.50854e-11		1.48893e-11	1.33181e-11
25.14	1.50859e-11		1.48906e-11	1.33133e-11
25.16	1.50877e-11		1.48886e-11	1.33215e-11
25.18	1.50965e-11		1.48929e-11	1.33166e-11
25.2	1.50931e-11		1.4892e-11	1.33185e-11
25.22	1.50921e-11		1.4892e-11	1.33139e-11
25.24	1.50896e-11		1.48985e-11	1.33164e-11
25.26	1.5096e-11		1.48944e-11	1.33167e-11
25.28	1.50904e-11		1.48922e-11	1.33181e-11
25.3	1.50925e-11		1.48972e-11	1.33196e-11
25.32	1.50903e-11		1.48984e-11	1.3315e-11
25.34	1.5096e-11		1.48943e-11	1.3317e-11
25.36	1.50905e-11		1.48958e-11	1.33155e-11
25.38	1.50977e-11		1.48945e-11	1.33169e-11
25.4	1.50917e-11		1.48977e-11	1.33205e-11
25.42	1.50924e-11		1.48917e-11	1.33153e-11
25.44	1.50921e-11		1.4895e-11	1.33149e-11
25.46	1.50958e-11		1.48973e-11	1.33177e-11
25.48	1.50946e-11		1.48982e-11	1.33144e-11
25.5	1.50947e-11		1.4899e-11	1.33169e-11
25.52	1.50962e-11		1.48895e-11	1.33191e-11
25.54	1.50958e-11		1.48955e-11	1.33253e-11
25.56	1.50952e-11		1.48987e-11	1.33207e-11
25.58	1.50953e-11		1.48948e-11	1.33153e-11
25.6	1.5099e-11		1.48974e-11	1.33204e-11
25.62	1.5095e-11		1.48937e-11	1.33168e-11
25.64	1.50982e-11		1.48926e-11	1.3312e-11
25.66	1.51013e-11		1.48965e-11	1.33172e-11
25.68	1.50979e-11		1.48933e-11	1.33174e-11
25.7	1.50994e-11		1.48975e-11	1.33183e-11
25.72	1.51003e-11		1.48983e-11	1.33206e-11
25.74	1.50998e-11		1.48965e-11	1.33204e-11
25.76	1.51016e-11		1.48954e-11	1.33164e-11
25.78	1.51044e-11		1.4893e-11	1.33171e-11
25.8	1.51048e-11		1.48941e-11	1.33205e-11
25.82	1.51062e-11		1.4893e-11	1.33188e-11
25.84	1.51028e-11		1.49107e-11	1.33176e-11
25.86	1.50997e-11		1.48957e-11	1.33185e-11
25.88	1.5098e-11		1.48978e-11	1.33182e-11
25.9	1.51056e-11		1.48984e-11	1.33147e-11
25.92	1.51075e-11		1.48959e-11	1.33145e-11
25.94	1.51038e-11		1.49e-11	1.33231e-11
25.96	1.5105e-11		1.48938e-11	1.33178e-11
25.98	1.50979e-11		1.48941e-11	1.3317e-11
26	1.51014e-11		1.48947e-11	1.33172e-11
26.02	1.5105e-11		1.48945e-11	1.33141e-11
26.04	1.51027e-11		1.48922e-11	1.33156e-11
26.06	1.51061e-11		1.4895e-11	1.33182e-11
26.08	1.51077e-11		1.48939e-11	1.33177e-11
26.1	1.51064e-11		1.48969e-11	1.33144e-11
26.12	1.50998e-11		1.48914e-11	1.33194e-11
26.14			1.48943e-11	1.33132e-11
26.16			1.48929e-11	1.33156e-11
26.18			1.48934e-11	1.33175e-11
26.2			1.48935e-11	1.33178e-11
26.22			1.48939e-11	1.33155e-11
26.24			1.48925e-11	1.33139e-11
26.26			1.48961e-11	1.33128e-11
26.28			1.49016e-11	1.33157e-11
26.3			1.48925e-11	1.3314e-11
26.32			1.48918e-11	1.33172e-11
26.34			1.48927e-11	1.33213e-11
26.36			1.48954e-11	1.33163e-11
26.38			1.48963e-11	1.33172e-11
26.4			1.48974e-11	1.33159e-11
26.42			1.48889e-11	1.33204e-11
26.44			1.48991e-11	1.33115e-11
26.46			1.48962e-11	1.33195e-11
26.48			1.48992e-11	1.33178e-11
26.5			1.48964e-11	1.33175e-11
26.52			1.48978e-11	1.33157e-11
26.54			1.48965e-11	1.33174e-11
26.56			1.48991e-11	1.33152e-11
26.58			1.48947e-11	1.33195e-11
26.6			1.48981e-11	1.33169e-11
26.62			1.48985e-11	1.33193e-11
26.64			1.48997e-11	1.3315e-11
26.66			1.48957e-11	1.33191e-11
26.68			1.48969e-11	1.33167e-11
26.7			1.48961e-11	1.3319e-11
26.72			1.48973e-11	1.3315e-11
26.74			1.49001e-11	1.33207e-11
26.76			1.48987e-11	1.33173e-11
26.78			1.48957e-11	1.3319e-11
26.8			1.48968e-11	1.33171e-11
26.82			1.48967e-11	1.33198e-11
26.84			1.48945e-11	1.33192e-11
26.86			1.48954e-11	1.33177e-11
26.88			1.48993e-11	1.33177e-11
26.9			1.48978e-11	1.33158e-11
26.92			1.48957e-11	1.33159e-11
26.94			1.48903e-11	1.33193e-11
26.96			1.49e-11	1.33125e-11
26.98			1.48984e-11	1.33176e-11
27			1.48913e-11	1.33121e-11
27.02			1.48972e-11	1.33168e-11
27.04			1.48977e-11
27.06			1.4896e-11
27.08			1.48976e-11
27.1			1.48971e-11
27.12			1.48958e-11
27.14			1.48953e-11
27.16			1.48999e-11
27.18			1.48959e-11
27.2			1.48987e-11
27.22			1.48989e-11
27.24			1.49016e-11
27.26			1.49012e-11
27.28			1.4899e-11
27.3			1.48995e-11
27.32			1.49028e-11
27.34
27.36
27.38
27.4
27.42
27.44
27.46
27.48
27.5
27.52
27.54
27.56
27.58
27.6
27.62
27.64
27.66
27.68
27.7
27.72
27.74
27.76
27.78
27.8
27.82
27.84
27.86
27.88
27.9
27.92
27.94
27.96
27.98
28
28.02
28.04
28.06
28.08
28.1
28.12
28.14
28.16
28.18
28.2
28.22
28.24
28.26
28.28
28.3
28.32
28.34
28.36
28.38
28.4
28.42
28.44
28.46
28.48
28.5
28.52
28.54
28.56
28.58
28.6
28.62
28.64
28.66
28.68
28.7
28.72
28.74
28.76
28.78
28.8
28.82
28.84
28.86
28.88
28.9
28.92
28.94
28.96
28.98
29
29.02
29.04
29.06
29.08
29.1
29.12
29.14
29.16
29.18
29.2
29.22
29.24
29.26
29.28
29.3
29.32
29.34
29.36
29.38
29.4
29.42
29.44
29.46
29.48
29.5
29.52
29.54
29.56
29.58
29.6
29.62
29.64
29.66
29.68
29.7
29.72
29.74
29.76
29.78
29.8
29.82
29.84
29.86
29.88
29.9
29.92
29.94
29.96
29.98
30
30.02
30.04
30.06
30.08
30.1
30.12
30.14
30.16
30.18
30.2
30.22
30.24
30.26
30.28
30.3
30.32
30.34
30.36
30.38
30.4
30.42
30.44
30.46
30.48
30.5
30.52
30.54
30.56
30.58
30.6
30.62
30.64
30.66
30.68
30.7
30.72
30.74
30.76
30.78
30.8
30.82
30.84
30.86
30.88
30.9
30.92
30.94
30.96
30.98
31
31.02
31.04
31.06
31.08
31.1
31.12
31.14
31.16
31.18
31.2
31.22
31.24
31.26
31.28
31.3
31.32
31.34
31.36
31.38
31.4
31.42
31.44
31.46
31.48
31.5
31.52
31.54
31.56
31.58
31.6
31.62
31.64
31.66
31.68
31.7
31.72
31.74
31.76
31.78
31.8
31.82
31.84
31.86
31.88
31.9
31.92
31.94
31.96
31.98
32
32.02
32.04
32.06
32.08
32.1
32.12
32.14
32.16
32.18
32.2
32.22
32.24
32.26
32.28
32.3
32.32
32.34
32.36
32.38
32.4
32.42
32.44
32.46
32.48
32.5
32.52
32.54
32.56
32.58
32.6
32.62
32.64
32.66
32.68
32.7
32.72
32.74
32.76
32.78
32.8
32.82
32.84
32.86
32.88
32.9
32.92
32.94
32.96
32.98
33
33.02
33.04
33.06
33.08
33.1
33.12
33.14
33.16
33.18
33.2
33.22
33.24
33.26
33.28
33.3
33.32
33.34
33.36
33.38
33.4
33.42
33.44
33.46
33.48
33.5
33.52
33.54
33.56
33.58
33.6
33.62
33.64
33.66
33.68
33.7
33.72
33.74
33.76
33.78
33.8
33.82
33.84
33.86
33.88
33.9
33.92
33.94
33.96
33.98
34
34.02
34.04
34.06
34.08
34.1
34.12
34.14
34.16
34.18
34.2
34.22
34.24
34.26
34.28
34.3
34.32
34.34
34.36
34.38
34.4
34.42
34.44
34.46
34.48
34.5
34.52
34.54
34.56
34.58
34.6
34.62
34.64
34.66
34.68
34.7
34.72
34.74
34.76
34.78
34.8
34.82
34.84
34.86
34.88
34.9
34.92
34.94
34.96
34.98
35
35.02
35.04
35.06
35.08
35.1
35.12
35.14
35.16
35.18
35.2
35.22
35.24
35.26
35.28
35.3
35.32
35.34
35.36
35.38
35.4
35.42
35.44
35.46
35.48
35.5
35.52
35.54
35.56
35.58
35.6
35.62
35.64
35.66
35.68
35.7
35.72
35.74
35.76
35.78
35.8
35.82
35.84
35.86
35.88
35.9
35.92
35.94
35.96
35.98
36
36.02
36.04
36.06
36.08
36.1
36.12
36.14
36.16
36.18
36.2
36.22
36.24
36.26
36.28
36.3
36.32
36.34
36.36
36.38
36.4
36.42
36.44
36.46
36.48
36.5
36.52
36.54
36.56
36.58
36.6
36.62
36.64
36.66
36.68
36.7
36.72
36.74
36.76
36.78
36.8
36.82
36.84
36.86
36.88
36.9
36.92
36.94
36.96
36.98
37
37.02
37.04
37.06
37.08
37.1
37.12
37.14
37.16
37.18
37.2
37.22
37.24
37.26
37.28
37.3
37.32
37.34
37.36
37.38
37.4
37.42
37.44
37.46
37.48
37.5
37.52
37.54
37.56
37.58
37.6
37.62
37.64
37.66
37.68
37.7
37.72
37.74
37.76
37.78
37.8
37.82
37.84
37.86
37.88
37.9
37.92
37.94
37.96
37.98
38
38.02
38.04
38.06
38.08
38.1
38.12
38.14
38.16
38.18
38.2
38.22
38.24
38.26
38.28
38.3
38.32
38.34
38.36
38.38
38.4
38.42
38.44
38.46
38.48
38.5
38.52
38.54
38.56
38.58
38.6
38.62
38.64
38.66
38.68
38.7
38.72
38.74
38.76
38.78
38.8
38.82
38.84
38.86
38.88
38.9
38.92
38.94
38.96
38.98
39
39.02
39.04
39.06
39.08
39.1
39.12
39.14
39.16
39.18
39.2
39.22
39.24
39.26
39.28
39.3
39.32
39.34
39.36
39.38
39.4
39.42
39.44
39.46
39.48
39.5
39.52
39.54
39.56
39.58
39.6
39.62
39.64
39.66
39.68
39.7
39.72
39.74
39.76
39.78
39.8
39.82
39.84
39.86
39.88
39.9
39.92
39.94
39.96
[truncated: 5,002 more rows]

## Sheet: 16618050-063.abf
	Cm(F)
Time(ms)	100 uM 5-HT	30 uM 5-HT	10 uM 5-HT	3 uM 5-HT	1 uM 5-HT	0.3 uM 5-HT	0.1 uM 5-HT
0.02	1.78655e-11	1.76507e-11	1.75773e-11	1.70892e-11	1.70012e-11	1.68177e-11	1.58676e-11
0.04	1.78662e-11	1.76577e-11	1.75664e-11	1.70798e-11	1.69902e-11	1.68205e-11	1.58639e-11
0.06	1.78679e-11	1.76538e-11	1.75732e-11	1.70887e-11	1.69987e-11	1.6813e-11	1.58626e-11
0.08	1.78645e-11	1.76519e-11	1.75789e-11	1.70929e-11	1.69923e-11	1.68132e-11	1.58605e-11
0.1	1.78649e-11	1.76537e-11	1.75771e-11	1.7088e-11	1.69894e-11	1.68206e-11	1.5869e-11
0.12	1.78669e-11	1.76539e-11	1.7577e-11	1.70889e-11	1.69972e-11	1.68184e-11	1.58693e-11
0.14	1.78674e-11	1.76525e-11	1.75765e-11	1.70909e-11	1.69923e-11	1.68179e-11	1.5855e-11
0.16	1.78629e-11	1.76583e-11	1.7576e-11	1.70853e-11	1.69938e-11	1.68191e-11	1.58679e-11
0.18	1.78676e-11	1.76522e-11	1.75774e-11	1.70912e-11	1.69895e-11	1.68216e-11	1.58642e-11
0.2	1.78713e-11	1.7656e-11	1.75838e-11	1.70917e-11	1.69998e-11	1.68195e-11	1.58637e-11
0.22	1.78696e-11	1.76571e-11	1.75814e-11	1.70937e-11	1.69915e-11	1.68174e-11	1.58726e-11
0.24	1.78714e-11	1.765e-11	1.7575e-11	1.70962e-11	1.69925e-11	1.68167e-11	1.58708e-11
0.26	1.78639e-11	1.76539e-11	1.75713e-11	1.70907e-11	1.69932e-11	1.68181e-11	1.58754e-11
0.28	1.7868e-11	1.76497e-11	1.75785e-11	1.70874e-11	1.69925e-11	1.68238e-11	1.58693e-11
0.3	1.78656e-11	1.76542e-11	1.7584e-11	1.70917e-11	1.69964e-11	1.68189e-11	1.58763e-11
0.32	1.78692e-11	1.76522e-11	1.75796e-11	1.70902e-11	1.69956e-11	1.68192e-11	1.58613e-11
0.34	1.78682e-11	1.76527e-11	1.7582e-11	1.70868e-11	1.69903e-11	1.68142e-11	1.58704e-11
0.36	1.78752e-11	1.76538e-11	1.75807e-11	1.70913e-11	1.69939e-11	1.68201e-11	1.58676e-11
0.38	1.78687e-11	1.7651e-11	1.75814e-11	1.70925e-11	1.69907e-11	1.68207e-11	1.58744e-11
0.4	1.78721e-11	1.76467e-11	1.75832e-11	1.70894e-11	1.69926e-11	1.68162e-11	1.58809e-11
0.42	1.78684e-11	1.76494e-11	1.75748e-11	1.70854e-11	1.69943e-11	1.68181e-11	1.58916e-11
0.44	1.78685e-11	1.76539e-11	1.75779e-11	1.70912e-11	1.69935e-11	1.682e-11	1.58793e-11
0.46	1.78692e-11	1.76552e-11	1.75769e-11	1.70849e-11	1.69949e-11	1.68201e-11	1.5883e-11
0.48	1.78766e-11	1.76576e-11	1.75799e-11	1.70887e-11	1.69871e-11	1.6819e-11	1.58857e-11
0.5	1.78774e-11	1.76549e-11	1.75801e-11	1.70923e-11	1.69941e-11	1.68195e-11	1.58855e-11
0.52	1.78713e-11	1.76524e-11	1.75754e-11	1.70914e-11	1.69984e-11	1.68245e-11	1.58708e-11
0.54	1.7873e-11	1.76514e-11	1.75763e-11	1.70917e-11	1.69981e-11	1.68241e-11	1.58868e-11
0.56	1.78702e-11	1.76569e-11	1.75771e-11	1.70913e-11	1.69957e-11	1.68284e-11	1.58678e-11
0.58	1.78685e-11	1.76587e-11	1.75872e-11	1.70872e-11	1.70027e-11	1.6827e-11	1.58619e-11
0.6	1.7866e-11	1.76567e-11	1.75817e-11	1.70896e-11	1.69973e-11	1.68247e-11	1.58877e-11
0.62	1.78711e-11	1.76572e-11	1.75795e-11	1.70924e-11	1.69965e-11	1.68232e-11	1.58839e-11
0.64	1.787e-11	1.76577e-11	1.75787e-11	1.70921e-11	1.69961e-11	1.68222e-11	1.58808e-11
0.66	1.78667e-11	1.76524e-11	1.75735e-11	1.70953e-11	1.69976e-11	1.68286e-11	1.58972e-11
0.68	1.78719e-11	1.76597e-11	1.75808e-11	1.70876e-11	1.69987e-11	1.68242e-11	1.58843e-11
0.7	1.78664e-11	1.76609e-11	1.75789e-11	1.70915e-11	1.69934e-11	1.68304e-11	1.58893e-11
0.72	1.78714e-11	1.76604e-11	1.75842e-11	1.70936e-11	1.69956e-11	1.68273e-11	1.58904e-11
0.74	1.78676e-11	1.76582e-11	1.75746e-11	1.70876e-11	1.69916e-11	1.68233e-11	1.58804e-11
0.76	1.78699e-11	1.76566e-11	1.75807e-11	1.70916e-11	1.69972e-11	1.68245e-11	1.58756e-11
0.78	1.78715e-11	1.76609e-11	1.75803e-11	1.70911e-11	1.70024e-11	1.68286e-11	1.58808e-11
0.8	1.78725e-11	1.76604e-11	1.75756e-11	1.70874e-11	1.70018e-11	1.68365e-11	1.58773e-11
0.82	1.78714e-11	1.7656e-11	1.75844e-11	1.7085e-11	1.70028e-11	1.68286e-11	1.58826e-11
0.84	1.78733e-11	1.76574e-11	1.75813e-11	1.70847e-11	1.70009e-11	1.68256e-11	1.58992e-11
0.86	1.78722e-11	1.76611e-11	1.75781e-11	1.7085e-11	1.70037e-11	1.68345e-11	1.58927e-11
0.88	1.78722e-11	1.7658e-11	1.75765e-11	1.70917e-11	1.70002e-11	1.68258e-11	1.58902e-11
0.9	1.78764e-11	1.7659e-11	1.75783e-11	1.70954e-11	1.69927e-11	1.68244e-11	1.59009e-11
0.92	1.78718e-11	1.76568e-11	1.758e-11	1.709e-11	1.69927e-11	1.6815e-11	1.5886e-11
0.94	1.78782e-11	1.76567e-11	1.75833e-11	1.70868e-11	1.69958e-11	1.68216e-11	1.58777e-11
0.96	1.78713e-11	1.76602e-11	1.75784e-11	1.70916e-11	1.69971e-11	1.68227e-11	1.589e-11
0.98	1.78697e-11	1.76605e-11	1.75807e-11	1.70921e-11	1.70024e-11	1.68319e-11	1.58743e-11
1	1.78784e-11	1.76575e-11	1.75764e-11	1.70928e-11	1.69939e-11	1.68264e-11	1.5878e-11
1.02	1.78716e-11	1.76592e-11	1.7581e-11	1.70958e-11	1.69969e-11	1.68248e-11	1.5882e-11
1.04	1.78721e-11	1.76587e-11	1.75801e-11	1.70936e-11	1.69976e-11	1.68282e-11	1.58852e-11
1.06	1.78702e-11	1.76559e-11	1.75824e-11	1.70914e-11	1.69971e-11	1.68242e-11	1.58808e-11
1.08	1.78685e-11	1.76595e-11	1.75784e-11	1.70914e-11	1.69947e-11	1.68327e-11	1.58729e-11
1.1	1.78791e-11	1.76601e-11	1.75836e-11	1.70897e-11	1.69969e-11	1.68213e-11	1.58751e-11
1.12	1.78751e-11	1.76584e-11	1.75815e-11	1.70928e-11	1.69938e-11	1.68197e-11	1.58637e-11
1.14	1.78758e-11	1.76575e-11	1.75903e-11	1.70882e-11	1.69939e-11	1.68281e-11	1.58637e-11
1.16	1.78754e-11	1.76568e-11	1.75845e-11	1.70881e-11	1.70006e-11	1.68302e-11	1.58728e-11
1.18	1.78725e-11	1.76608e-11	1.75862e-11	1.70866e-11	1.69942e-11	1.68256e-11	1.58748e-11
1.2	1.78762e-11	1.76583e-11	1.75773e-11	1.70898e-11	1.69959e-11	1.68288e-11	1.58748e-11
1.22	1.78742e-11	1.76626e-11	1.75797e-11	1.70963e-11	1.70049e-11	1.68361e-11	1.58711e-11
1.24	1.78778e-11	1.76697e-11	1.75846e-11	1.7092e-11	1.6991e-11	1.68214e-11	1.58702e-11
1.26	1.78716e-11	1.76619e-11	1.75816e-11	1.70916e-11	1.70001e-11	1.68271e-11	1.58713e-11
1.28	1.78768e-11	1.7661e-11	1.75825e-11	1.70889e-11	1.69998e-11	1.68282e-11	1.58765e-11
1.3	1.78788e-11	1.76595e-11	1.75786e-11	1.70937e-11	1.69988e-11	1.68239e-11	1.58625e-11
1.32	1.78762e-11	1.76585e-11	1.75816e-11	1.70953e-11	1.70007e-11	1.68267e-11	1.58809e-11
1.34	1.7878e-11	1.76608e-11	1.75811e-11	1.70912e-11	1.70044e-11	1.68233e-11	1.58837e-11
1.36	1.78771e-11	1.76577e-11	1.75766e-11	1.7096e-11	1.70027e-11	1.68229e-11	1.58686e-11
1.38	1.78815e-11	1.76626e-11	1.75732e-11	1.7092e-11	1.70036e-11	1.68197e-11	1.58729e-11
1.4	1.78776e-11	1.76607e-11	1.75846e-11	1.70889e-11	1.69993e-11	1.68219e-11	1.58697e-11
1.42	1.78788e-11	1.76625e-11	1.75836e-11	1.7098e-11	1.69968e-11	1.68217e-11	1.58702e-11
1.44	1.78762e-11	1.76614e-11	1.75809e-11	1.70935e-11	1.7e-11	1.68312e-11	1.58698e-11
1.46	1.78844e-11	1.7662e-11	1.75803e-11	1.70917e-11	1.69997e-11	1.68248e-11	1.5876e-11
1.48	1.78786e-11	1.76633e-11	1.75796e-11	1.70994e-11	1.69961e-11	1.68214e-11	1.587e-11
1.5	1.78756e-11	1.76593e-11	1.75696e-11	1.70949e-11	1.69919e-11	1.68334e-11	1.58706e-11
1.52	1.78764e-11	1.76599e-11	1.75749e-11	1.70959e-11	1.69963e-11	1.6825e-11	1.58524e-11
1.54	1.78732e-11	1.76609e-11	1.75858e-11	1.70911e-11	1.69927e-11	1.68288e-11	1.58808e-11
1.56	1.78815e-11	1.76613e-11	1.75816e-11	1.70913e-11	1.69965e-11	1.68218e-11	1.58804e-11
1.58	1.78737e-11	1.76635e-11	1.75764e-11	1.70936e-11	1.69985e-11	1.68254e-11	1.5883e-11
1.6	1.78718e-11	1.76572e-11	1.75848e-11	1.70885e-11	1.7001e-11	1.68207e-11	1.58753e-11
1.62	1.78776e-11	1.76632e-11	1.75794e-11	1.70964e-11	1.69982e-11	1.68238e-11	1.58929e-11
1.64	1.78775e-11	1.76579e-11	1.75808e-11	1.70931e-11	1.69955e-11	1.68197e-11	1.58793e-11
1.66	1.78765e-11	1.76634e-11	1.75805e-11	1.70929e-11	1.69989e-11	1.68199e-11	1.58905e-11
1.68	1.78808e-11	1.76632e-11	1.7585e-11	1.70893e-11	1.69964e-11	1.68188e-11	1.58775e-11
1.7	1.78768e-11	1.76623e-11	1.75815e-11	1.70992e-11	1.69983e-11	1.682e-11	1.58688e-11
1.72	1.7878e-11	1.76615e-11	1.75855e-11	1.70959e-11	1.70035e-11	1.68211e-11	1.58626e-11
1.74	1.78778e-11	1.76616e-11	1.7593e-11	1.70916e-11	1.70011e-11	1.6823e-11	1.58733e-11
1.76	1.78735e-11	1.76628e-11	1.75779e-11	1.70929e-11	1.6995e-11	1.68165e-11	1.58713e-11
1.78	1.7877e-11	1.76661e-11	1.75842e-11	1.70975e-11	1.69945e-11	1.68254e-11	1.58835e-11
1.8	1.78734e-11	1.7665e-11	1.7588e-11	1.70926e-11	1.70031e-11	1.68176e-11	1.58656e-11
1.82	1.7883e-11	1.76649e-11	1.75849e-11	1.70979e-11	1.69979e-11	1.68203e-11	1.58839e-11
1.84	1.78743e-11	1.76677e-11	1.7579e-11	1.70989e-11	1.70016e-11	1.6828e-11	1.58752e-11
1.86	1.78829e-11	1.76688e-11	1.75867e-11	1.70884e-11	1.6999e-11	1.68244e-11	1.58812e-11
1.88	1.78788e-11	1.76644e-11	1.75903e-11	1.70946e-11	1.69978e-11	1.68246e-11	1.58881e-11
1.9	1.78776e-11	1.76671e-11	1.75922e-11	1.7093e-11	1.69994e-11	1.68239e-11	1.58751e-11
1.92	1.78798e-11	1.76665e-11	1.75879e-11	1.70935e-11	1.69968e-11	1.68278e-11	1.58863e-11
1.94	1.78785e-11	1.76653e-11	1.75854e-11	1.70948e-11	1.69978e-11	1.68271e-11	1.58905e-11
1.96	1.78777e-11	1.76666e-11	1.75894e-11	1.70943e-11	1.70076e-11	1.68309e-11	1.58872e-11
1.98	1.78779e-11	1.76654e-11	1.75829e-11	1.70919e-11	1.70045e-11	1.68312e-11	1.58983e-11
2	1.78816e-11	1.76649e-11	1.75897e-11	1.70962e-11	1.69998e-11	1.68297e-11	1.58796e-11
2.02	1.78772e-11	1.76666e-11	1.75891e-11	1.70868e-11	1.70104e-11	1.6833e-11	1.58866e-11
2.04	1.78806e-11	1.76721e-11	1.759e-11	1.70954e-11	1.69996e-11	1.68213e-11	1.58793e-11
2.06	1.78836e-11	1.76662e-11	1.75937e-11	1.70957e-11	1.70026e-11	1.68246e-11	1.58749e-11
2.08	1.78835e-11	1.76653e-11	1.75975e-11	1.70916e-11	1.70058e-11	1.68256e-11	1.58938e-11
2.1	1.78805e-11	1.76762e-11	1.75856e-11	1.70865e-11	1.70061e-11	1.68301e-11	1.58824e-11
2.12	1.7881e-11	1.76685e-11	1.75873e-11	1.70972e-11	1.70033e-11	1.68212e-11	1.58861e-11
2.14	1.78846e-11	1.76689e-11	1.7591e-11	1.70992e-11	1.70014e-11	1.68232e-11	1.58982e-11
2.16	1.78805e-11	1.7673e-11	1.75869e-11	1.7091e-11	1.69984e-11	1.68305e-11	1.5879e-11
2.18	1.78914e-11	1.76711e-11	1.75806e-11	1.70948e-11	1.70034e-11	1.6829e-11	1.58951e-11
2.2	1.78788e-11	1.76631e-11	1.7583e-11	1.70924e-11	1.70046e-11	1.68227e-11	1.5879e-11
2.22	1.788e-11	1.76692e-11	1.75889e-11	1.70905e-11	1.70054e-11	1.68222e-11	1.58954e-11
2.24	1.7884e-11	1.76677e-11	1.7584e-11	1.70998e-11	1.69992e-11	1.68261e-11	1.58744e-11
2.26	1.7883e-11	1.76663e-11	1.75881e-11	1.70985e-11	1.70069e-11	1.68181e-11	1.58715e-11
2.28	1.7876e-11	1.76648e-11	1.75841e-11	1.70894e-11	1.7003e-11	1.68282e-11	1.58786e-11
2.3	1.78792e-11	1.76659e-11	1.75887e-11	1.70895e-11	1.70054e-11	1.68266e-11	1.58753e-11
2.32	1.78864e-11	1.76703e-11	1.75778e-11	1.70925e-11	1.70043e-11	1.68235e-11	1.58838e-11
2.34	1.78787e-11	1.76685e-11	1.75772e-11	1.70879e-11	1.70122e-11	1.68285e-11	1.59054e-11
2.36	1.78819e-11	1.76644e-11	1.75855e-11	1.70991e-11	1.70072e-11	1.68241e-11	1.58707e-11
2.38	1.78794e-11	1.76643e-11	1.75826e-11	1.70907e-11	1.70017e-11	1.68217e-11	1.58805e-11
2.4	1.78771e-11	1.76727e-11	1.75779e-11	1.71011e-11	1.70028e-11	1.68285e-11	1.58887e-11
2.42	1.78846e-11	1.76674e-11	1.75853e-11	1.70921e-11	1.70032e-11	1.68245e-11	1.58794e-11
2.44	1.78843e-11	1.76616e-11	1.75806e-11	1.70869e-11	1.70089e-11	1.6826e-11	1.58732e-11
2.46	1.78793e-11	1.76392e-11	1.75876e-11	1.70905e-11	1.70086e-11	1.68255e-11	1.58845e-11
2.48	1.78797e-11	1.764e-11	1.75886e-11	1.70948e-11	1.70079e-11	1.68258e-11	1.58858e-11
2.5	1.78835e-11	1.76456e-11	1.75862e-11	1.70927e-11	1.70112e-11	1.68264e-11	1.58838e-11
2.52	1.78804e-11	1.76397e-11	1.75901e-11	1.7094e-11	1.70136e-11	1.68361e-11	1.58773e-11
2.54	1.7879e-11	1.76475e-11	1.75876e-11	1.7096e-11	1.70048e-11	1.68252e-11	1.58741e-11
2.56	1.78821e-11	1.76543e-11	1.7587e-11	1.70974e-11	1.70089e-11	1.68287e-11	1.58804e-11
2.58	1.78851e-11	1.76548e-11	1.75836e-11	1.71004e-11	1.70017e-11	1.68225e-11	1.58626e-11
2.6	1.78813e-11	1.76556e-11	1.75868e-11	1.70971e-11	1.70015e-11	1.68256e-11	1.58737e-11
2.62	1.7883e-11	1.76596e-11	1.7585e-11	1.70993e-11	1.70064e-11	1.68273e-11	1.58611e-11
2.64	1.78836e-11	1.76598e-11	1.75874e-11	1.70936e-11	1.69988e-11	1.68268e-11	1.58694e-11
2.66	1.78806e-11	1.76646e-11	1.75808e-11	1.70948e-11	1.70044e-11	1.68304e-11	1.58808e-11
2.68	1.78806e-11	1.76683e-11	1.75897e-11	1.70912e-11	1.70019e-11	1.6826e-11	1.58853e-11
2.7	1.78831e-11	1.76625e-11	1.75868e-11	1.70907e-11	1.69969e-11	1.68284e-11	1.58847e-11
2.72	1.78833e-11	1.76664e-11	1.75886e-11	1.70991e-11	1.69959e-11	1.68241e-11	1.58848e-11
2.74	1.78814e-11	1.76644e-11	1.75849e-11	1.70947e-11	1.69944e-11	1.68253e-11	1.58849e-11
2.76	1.78798e-11	1.76654e-11	1.75856e-11	1.70982e-11	1.69921e-11	1.68327e-11	1.58966e-11
2.78	1.78816e-11	1.76645e-11	1.75859e-11	1.70981e-11	1.69968e-11	1.68232e-11	1.58883e-11
2.8	1.78838e-11	1.767e-11	1.75906e-11	1.70944e-11	1.6996e-11	1.68231e-11	1.58885e-11
2.82	1.78797e-11	1.76702e-11	1.75846e-11	1.70892e-11	1.69927e-11	1.68265e-11	1.58917e-11
2.84	1.78813e-11	1.76708e-11	1.75977e-11	1.70912e-11	1.69988e-11	1.68194e-11	1.58766e-11
2.86	1.78831e-11	1.76702e-11	1.75927e-11	1.70978e-11	1.70035e-11	1.68262e-11	1.58772e-11
2.88	1.78836e-11	1.76674e-11	1.75924e-11	1.70992e-11	1.69966e-11	1.68305e-11	1.58791e-11
2.9	1.78788e-11	1.76732e-11	1.75905e-11	1.71017e-11	1.69999e-11	1.68311e-11	1.58771e-11
2.92	1.78802e-11	1.76654e-11	1.75899e-11	1.70921e-11	1.69972e-11	1.68266e-11	1.58915e-11
2.94	1.78832e-11	1.7672e-11	1.75829e-11	1.70897e-11	1.69989e-11	1.68312e-11	1.58905e-11
2.96	1.78856e-11	1.76765e-11	1.75914e-11	1.70976e-11	1.69963e-11	1.68273e-11	1.58834e-11
2.98	1.78793e-11	1.76745e-11	1.75919e-11	1.70942e-11	1.69959e-11	1.68291e-11	1.58769e-11
3	1.78833e-11	1.76722e-11	1.75915e-11	1.70865e-11	1.69982e-11	1.68292e-11	1.58964e-11
3.02	1.78851e-11	1.76729e-11	1.75848e-11	1.70867e-11	1.69993e-11	1.68247e-11	1.58962e-11
3.04	1.78847e-11	1.76778e-11	1.75947e-11	1.70907e-11	1.69999e-11	1.68284e-11	1.58886e-11
3.06	1.78838e-11	1.76731e-11	1.75852e-11	1.70936e-11	1.69995e-11	1.68291e-11	1.58931e-11
3.08	1.78792e-11	1.76719e-11	1.75924e-11	1.70943e-11	1.69969e-11	1.68301e-11	1.58934e-11
3.1	1.78775e-11	1.76723e-11	1.7597e-11	1.70942e-11	1.69976e-11	1.68249e-11	1.59005e-11
3.12	1.78829e-11	1.7672e-11	1.75981e-11	1.70862e-11	1.69955e-11	1.6833e-11	1.59031e-11
3.14	1.78856e-11	1.76737e-11	1.75924e-11	1.70971e-11	1.69929e-11	1.68331e-11	1.5894e-11
3.16	1.78848e-11	1.76784e-11	1.75936e-11	1.7093e-11	1.69955e-11	1.68302e-11	1.58907e-11
3.18	1.7887e-11	1.76745e-11	1.7597e-11	1.70898e-11	1.69995e-11	1.68293e-11	1.58999e-11
3.2	1.78869e-11	1.76803e-11	1.75933e-11	1.70951e-11	1.69944e-11	1.68251e-11	1.59032e-11
3.22	1.78799e-11	1.76727e-11	1.76034e-11	1.70947e-11	1.70013e-11	1.68317e-11	1.58907e-11
3.24	1.78826e-11	1.76797e-11	1.75954e-11	1.70997e-11	1.69938e-11	1.68299e-11	1.5888e-11
3.26	1.78836e-11	1.76687e-11	1.75994e-11	1.70912e-11	1.69992e-11	1.68276e-11	1.5897e-11
3.28	1.78861e-11	1.76711e-11	1.75898e-11	1.70977e-11	1.69927e-11	1.68233e-11	1.59012e-11
3.3	1.78862e-11	1.76699e-11	1.75899e-11	1.70965e-11	1.7001e-11	1.68289e-11	1.59048e-11
3.32	1.78837e-11	1.76785e-11	1.75913e-11	1.70997e-11	1.70035e-11	1.68357e-11	1.5899e-11
3.34	1.78878e-11	1.76736e-11	1.7589e-11	1.70878e-11	1.70038e-11	1.68274e-11	1.5899e-11
3.36	1.78819e-11	1.76706e-11	1.75852e-11	1.70926e-11	1.70065e-11	1.68306e-11	1.58997e-11
3.38	1.78875e-11	1.76752e-11	1.75924e-11	1.70934e-11	1.70011e-11	1.68357e-11	1.59055e-11
3.4	1.78816e-11	1.76818e-11	1.75889e-11	1.70999e-11	1.7001e-11	1.68336e-11	1.58941e-11
3.42	1.78863e-11	1.76768e-11	1.75919e-11	1.7093e-11	1.70054e-11	1.68343e-11	1.58946e-11
3.44	1.7883e-11	1.76764e-11	1.75933e-11	1.70951e-11	1.70099e-11	1.68338e-11	1.58747e-11
3.46	1.78815e-11	1.76773e-11	1.75895e-11	1.70947e-11	1.70023e-11	1.68356e-11	1.58877e-11
3.48	1.78883e-11	1.76755e-11	1.76e-11	1.70946e-11	1.70022e-11	1.68383e-11	1.5887e-11
3.5	1.78865e-11	1.76778e-11	1.7602e-11	1.70892e-11	1.70032e-11	1.68317e-11	1.5902e-11
3.52	1.78875e-11	1.76747e-11	1.75962e-11	1.70919e-11	1.70013e-11	1.68294e-11	1.58819e-11
3.54	1.7894e-11	1.76685e-11	1.75883e-11	1.70823e-11	1.6997e-11	1.68357e-11	1.58902e-11
3.56	1.78866e-11	1.76717e-11	1.75935e-11	1.70909e-11	1.70046e-11	1.68341e-11	1.58959e-11
3.58	1.78869e-11	1.7671e-11	1.75969e-11	1.70928e-11	1.69974e-11	1.68299e-11	1.5905e-11
3.6	1.78888e-11	1.76747e-11	1.75985e-11	1.70926e-11	1.70023e-11	1.68429e-11	1.58994e-11
3.62	1.7889e-11	1.76753e-11	1.75967e-11	1.70971e-11	1.69993e-11	1.6836e-11	1.59182e-11
3.64	1.78893e-11	1.76744e-11	1.75906e-11	1.70942e-11	1.70061e-11	1.68257e-11	1.59038e-11
3.66	1.78882e-11	1.76762e-11	1.7593e-11	1.70929e-11	1.7001e-11	1.68355e-11	1.58967e-11
3.68	1.78861e-11	1.76723e-11	1.76042e-11	1.70915e-11	1.70087e-11	1.68378e-11	1.58961e-11
3.7	1.7887e-11	1.76741e-11	1.76048e-11	1.70951e-11	1.7012e-11	1.68351e-11	1.5902e-11
3.72	1.78902e-11	1.76731e-11	1.75943e-11	1.70952e-11	1.70044e-11	1.68351e-11	1.58977e-11
3.74	1.78883e-11	1.76836e-11	1.76042e-11	1.70884e-11	1.7002e-11	1.68422e-11	1.58962e-11
3.76	1.78872e-11	1.76694e-11	1.76006e-11	1.70907e-11	1.70074e-11	1.6834e-11	1.59018e-11
3.78	1.78857e-11	1.76789e-11	1.75983e-11	1.70913e-11	1.70022e-11	1.68352e-11	1.5893e-11
3.8	1.78938e-11	1.76776e-11	1.76004e-11	1.70902e-11	1.70007e-11	1.68391e-11	1.59071e-11
3.82	1.7892e-11	1.76703e-11	1.76015e-11	1.70936e-11	1.70034e-11	1.68306e-11	1.59025e-11
3.84	1.78863e-11	1.76702e-11	1.75993e-11	1.70935e-11	1.69976e-11	1.68339e-11	1.58993e-11
3.86	1.78843e-11	1.76718e-11	1.75941e-11	1.70903e-11	1.70035e-11	1.68331e-11	1.59038e-11
3.88	1.78837e-11	1.76799e-11	1.76028e-11	1.70914e-11	1.70069e-11	1.68309e-11	1.59033e-11
3.9	1.78868e-11	1.76756e-11	1.75976e-11	1.70895e-11	1.70018e-11	1.68308e-11	1.58956e-11
3.92	1.78841e-11	1.76659e-11	1.75918e-11	1.70904e-11	1.70001e-11	1.68297e-11	1.59095e-11
3.94	1.78835e-11	1.76762e-11	1.75981e-11	1.70903e-11	1.69973e-11	1.68297e-11	1.59004e-11
3.96	1.78847e-11	1.76751e-11	1.75932e-11	1.70912e-11	1.69895e-11	1.68345e-11	1.58958e-11
3.98	1.78853e-11	1.76765e-11	1.75925e-11	1.70915e-11	1.70077e-11	1.68294e-11	1.58904e-11
4	1.78917e-11	1.76812e-11	1.75912e-11	1.70917e-11	1.70092e-11	1.68399e-11	1.59004e-11
4.02	1.78888e-11	1.76748e-11	1.7591e-11	1.70951e-11	1.7015e-11	1.68336e-11	1.58849e-11
4.04	1.78938e-11	1.76765e-11	1.75909e-11	1.70857e-11	1.70188e-11	1.68386e-11	1.58931e-11
4.06	1.78892e-11	1.76745e-11	1.75861e-11	1.70952e-11	1.70156e-11	1.68296e-11	1.58794e-11
4.08	1.78931e-11	1.76737e-11	1.75963e-11	1.7095e-11	1.70091e-11	1.68291e-11	1.58904e-11
4.1	1.78913e-11	1.76725e-11	1.75952e-11	1.70966e-11	1.70219e-11	1.68288e-11	1.58869e-11
4.12	1.78876e-11	1.76749e-11	1.75895e-11	1.70959e-11	1.70226e-11	1.6829e-11	1.58917e-11
4.14	1.78858e-11	1.76777e-11	1.75897e-11	1.70927e-11	1.70234e-11	1.68344e-11	1.58972e-11
4.16	1.78796e-11	1.76784e-11	1.75848e-11	1.70916e-11	1.70206e-11	1.683e-11	1.58836e-11
4.18	1.78885e-11	1.76837e-11	1.75932e-11	1.70949e-11	1.70198e-11	1.68353e-11	1.58957e-11
4.2	1.78872e-11	1.76798e-11	1.75959e-11	1.70967e-11	1.7018e-11	1.68333e-11	1.58919e-11
4.22	1.78883e-11	1.76838e-11	1.75909e-11	1.70906e-11	1.7017e-11	1.6833e-11	1.58859e-11
4.24	1.78948e-11	1.76829e-11	1.75887e-11	1.70929e-11	1.70132e-11	1.68374e-11	1.58902e-11
4.26	1.78897e-11	1.76784e-11	1.75881e-11	1.70954e-11	1.70142e-11	1.68366e-11	1.58964e-11
4.28	1.78872e-11	1.76778e-11	1.75913e-11	1.7094e-11	1.70097e-11	1.68319e-11	1.58891e-11
4.3	1.78881e-11	1.76745e-11	1.75847e-11	1.70984e-11	1.70145e-11	1.68307e-11	1.58942e-11
4.32	1.78871e-11	1.76807e-11	1.75902e-11	1.70971e-11	1.70118e-11	1.68332e-11	1.58978e-11
4.34	1.78884e-11	1.76774e-11	1.75913e-11	1.70934e-11	1.70139e-11	1.68388e-11	1.5893e-11
4.36	1.78851e-11	1.76777e-11	1.75864e-11	1.70905e-11	1.701e-11	1.68302e-11	1.59115e-11
4.38	1.78909e-11	1.76776e-11	1.75907e-11	1.70927e-11	1.70087e-11	1.68361e-11	1.58876e-11
4.4	1.78961e-11	1.76741e-11	1.75902e-11	1.70975e-11	1.70108e-11	1.6839e-11	1.59056e-11
4.42	1.78945e-11	1.76782e-11	1.75892e-11	1.70986e-11	1.70192e-11	1.68371e-11	1.59001e-11
4.44	1.78913e-11	1.76805e-11	1.75855e-11	1.70853e-11	1.70118e-11	1.68363e-11	1.59083e-11
4.46	1.78904e-11	1.76772e-11	1.75982e-11	1.70915e-11	1.70096e-11	1.68332e-11	1.59015e-11
4.48	1.78917e-11	1.76788e-11	1.75896e-11	1.70901e-11	1.70095e-11	1.68301e-11	1.59096e-11
4.5	1.78882e-11	1.76782e-11	1.75952e-11	1.70945e-11	1.70097e-11	1.68343e-11	1.59106e-11
4.52	1.78936e-11	1.76747e-11	1.75968e-11	1.70967e-11	1.70138e-11	1.68345e-11	1.58939e-11
4.54	1.78914e-11	1.76811e-11	1.75956e-11	1.70869e-11	1.70124e-11	1.6836e-11	1.58974e-11
4.56	1.78918e-11	1.76784e-11	1.75958e-11	1.70959e-11	1.70151e-11	1.68301e-11	1.59081e-11
4.58	1.78858e-11	1.76741e-11	1.75951e-11	1.70951e-11	1.70109e-11	1.68286e-11	1.59059e-11
4.6	1.78884e-11	1.76826e-11	1.75888e-11	1.7096e-11	1.70184e-11	1.68324e-11	1.59121e-11
4.62	1.7887e-11	1.76866e-11	1.75933e-11	1.70932e-11	1.70207e-11	1.68288e-11	1.59014e-11
4.64	1.78888e-11	1.768e-11	1.75871e-11	1.70937e-11	1.70171e-11	1.68375e-11	1.58957e-11
4.66	1.78898e-11	1.76807e-11	1.75919e-11	1.70972e-11	1.70116e-11	1.68326e-11	1.59e-11
4.68	1.78867e-11	1.76839e-11	1.7595e-11	1.70821e-11	1.70136e-11	1.6838e-11	1.59024e-11
4.7	1.78903e-11	1.76779e-11	1.7597e-11	1.70926e-11	1.70108e-11	1.68352e-11	1.59177e-11
4.72	1.78939e-11	1.76829e-11	1.75946e-11	1.7088e-11	1.70115e-11	1.68445e-11	1.59188e-11
4.74	1.78942e-11	1.76828e-11	1.75941e-11	1.70905e-11	1.7013e-11	1.68359e-11	1.59191e-11
4.76	1.78929e-11	1.76847e-11	1.75986e-11	1.70904e-11	1.7013e-11	1.68359e-11	1.59126e-11
4.78	1.78934e-11	1.76754e-11	1.75986e-11	1.70893e-11	1.70202e-11	1.68317e-11	1.59168e-11
4.8	1.78928e-11	1.76815e-11	1.75958e-11	1.70929e-11	1.70135e-11	1.68368e-11	1.59294e-11
4.82	1.78927e-11	1.76818e-11	1.75942e-11	1.70903e-11	1.70103e-11	1.68393e-11	1.59264e-11
4.84	1.78959e-11	1.76783e-11	1.75981e-11	1.70901e-11	1.7005e-11	1.68319e-11	1.59345e-11
4.86	1.78911e-11	1.7673e-11	1.75961e-11	1.7093e-11	1.70156e-11	1.68282e-11	1.59374e-11
4.88	1.78863e-11	1.76803e-11	1.75961e-11	1.70918e-11	1.70136e-11	1.68395e-11	1.59298e-11
4.9	1.78848e-11	1.76813e-11	1.75936e-11	1.70916e-11	1.70224e-11	1.68405e-11	1.59374e-11
4.92	1.78906e-11	1.76806e-11	1.76019e-11	1.70929e-11	1.70139e-11	1.684e-11	1.59185e-11
4.94	1.78851e-11	1.76798e-11	1.75968e-11	1.70951e-11	1.70171e-11	1.68473e-11	1.59192e-11
4.96	1.78886e-11	1.76834e-11	1.76021e-11	1.70914e-11	1.7017e-11	1.68375e-11	1.59268e-11
4.98	1.78908e-11	1.76854e-11	1.75944e-11	1.70943e-11	1.70163e-11	1.68405e-11	1.59233e-11
5	1.78895e-11	1.76785e-11	1.76059e-11	1.70909e-11	1.70153e-11	1.68376e-11	1.59283e-11
5.02	1.78861e-11	1.76785e-11	1.76026e-11	1.70945e-11	1.70118e-11	1.68412e-11	1.59336e-11
5.04	1.7893e-11	1.76816e-11	1.76047e-11	1.70924e-11	1.70205e-11	1.68397e-11	1.59248e-11
5.06	1.78931e-11	1.76814e-11	1.75992e-11	1.70883e-11	1.70187e-11	1.68354e-11	1.59318e-11
5.08	1.78917e-11	1.76851e-11	1.76044e-11	1.70935e-11	1.702e-11	1.68411e-11	1.59278e-11
5.1	1.78973e-11	1.76793e-11	1.76022e-11	1.70894e-11	1.70181e-11	1.68346e-11	1.59112e-11
5.12	1.78924e-11	1.76815e-11	1.76e-11	1.70916e-11	1.70206e-11	1.68393e-11	1.58897e-11
5.14	1.78896e-11	1.76856e-11	1.7601e-11	1.70957e-11	1.70199e-11	1.68431e-11	1.58639e-11
5.16	1.78932e-11	1.76858e-11	1.76013e-11	1.70899e-11	1.70172e-11	1.68425e-11	1.58488e-11
5.18	1.78892e-11	1.76855e-11	1.76094e-11	1.70969e-11	1.70227e-11	1.6843e-11	1.58284e-11
5.2	1.78956e-11	1.76851e-11	1.76036e-11	1.70917e-11	1.70234e-11	1.68363e-11	1.58222e-11
5.22	1.78931e-11	1.76813e-11	1.76044e-11	1.70892e-11	1.70196e-11	1.68376e-11	1.58243e-11
5.24	1.78947e-11	1.7683e-11	1.76003e-11	1.70973e-11	1.70204e-11	1.68357e-11	1.58143e-11
5.26	1.78983e-11	1.7682e-11	1.76001e-11	1.70951e-11	1.70168e-11	1.68444e-11	1.58174e-11
5.28	1.7899e-11	1.76798e-11	1.75924e-11	1.70994e-11	1.70223e-11	1.68399e-11	1.58118e-11
5.3	1.78914e-11	1.7685e-11	1.75977e-11	1.70946e-11	1.70147e-11	1.68381e-11	1.58176e-11
5.32	1.78942e-11	1.76813e-11	1.7595e-11	1.70888e-11	1.70212e-11	1.68415e-11	1.58177e-11
5.34	1.78945e-11	1.76828e-11	1.75965e-11	1.70886e-11	1.70275e-11	1.68461e-11	1.58136e-11
5.36	1.78927e-11	1.76753e-11	1.75946e-11	1.70943e-11	1.7025e-11	1.68373e-11	1.58179e-11
5.38	1.78887e-11	1.76764e-11	1.75998e-11	1.70957e-11	1.70217e-11	1.68372e-11	1.58028e-11
5.4	1.78912e-11	1.76788e-11	1.75931e-11	1.70924e-11	1.70226e-11	1.68407e-11	1.58101e-11
5.42	1.78929e-11	1.76783e-11	1.76012e-11	1.70982e-11	1.70221e-11	1.68412e-11	1.58027e-11
5.44	1.78903e-11	1.76857e-11	1.75999e-11	1.70955e-11	1.7012e-11	1.68386e-11	1.58093e-11
5.46	1.78939e-11	1.76795e-11	1.75998e-11	1.70902e-11	1.70214e-11	1.68415e-11	1.58069e-11
5.48	1.7896e-11	1.76805e-11	1.75921e-11	1.70973e-11	1.70195e-11	1.68388e-11	1.58109e-11
5.5	1.78949e-11	1.76774e-11	1.76028e-11	1.70928e-11	1.70215e-11	1.68401e-11	1.57858e-11
5.52	1.7896e-11	1.76821e-11	1.75879e-11	1.7089e-11	1.70187e-11	1.68397e-11	1.57973e-11
5.54	1.78937e-11	1.76784e-11	1.7596e-11	1.70868e-11	1.70178e-11	1.68405e-11	1.5805e-11
5.56	1.78932e-11	1.76815e-11	1.7597e-11	1.70903e-11	1.70205e-11	1.68395e-11	1.5802e-11
5.58	1.7896e-11	1.7683e-11	1.75882e-11	1.70997e-11	1.70092e-11	1.68457e-11	1.58058e-11
5.6	1.78937e-11	1.76801e-11	1.75929e-11	1.70877e-11	1.70053e-11	1.68414e-11	1.5796e-11
5.62	1.78936e-11	1.76846e-11	1.75979e-11	1.70986e-11	1.70204e-11	1.6844e-11	1.57839e-11
5.64	1.78874e-11	1.76792e-11	1.75979e-11	1.70908e-11	1.70221e-11	1.68476e-11	1.57792e-11
5.66	1.789e-11	1.76827e-11	1.75928e-11	1.70922e-11	1.70157e-11	1.68458e-11	1.57759e-11
5.68	1.78973e-11	1.76823e-11	1.75889e-11	1.70928e-11	1.70241e-11	1.68443e-11	1.57716e-11
5.7	1.78935e-11	1.7679e-11	1.75876e-11	1.70861e-11	1.70241e-11	1.68463e-11	1.57776e-11
5.72	1.7901e-11	1.76835e-11	1.7594e-11	1.70888e-11	1.70227e-11	1.68404e-11	1.57783e-11
5.74	1.78993e-11	1.76812e-11	1.75974e-11	1.70902e-11	1.70202e-11	1.68402e-11	1.57678e-11
5.76	1.79016e-11	1.76854e-11	1.75912e-11	1.70872e-11	1.70194e-11	1.68384e-11	1.57664e-11
5.78	1.78951e-11	1.76873e-11	1.76031e-11	1.70861e-11	1.70231e-11	1.68439e-11	1.57738e-11
5.8	1.78956e-11	1.76867e-11	1.75982e-11	1.70898e-11	1.70278e-11	1.68375e-11	1.57758e-11
5.82	1.78969e-11	1.76809e-11	1.75965e-11	1.70955e-11	1.70211e-11	1.68427e-11	1.57716e-11
5.84	1.78965e-11	1.7684e-11	1.75972e-11	1.70919e-11	1.70248e-11	1.68395e-11	1.57704e-11
5.86	1.78951e-11	1.76859e-11	1.7593e-11	1.71017e-11	1.70143e-11	1.68357e-11	1.57715e-11
5.88	1.79e-11	1.7677e-11	1.76047e-11	1.70934e-11	1.70169e-11	1.68448e-11	1.57745e-11
5.9	1.79031e-11	1.76856e-11	1.7596e-11	1.70938e-11	1.70165e-11	1.6852e-11	1.57665e-11
5.92	1.79004e-11	1.76807e-11	1.76039e-11	1.70922e-11	1.70239e-11	1.68454e-11	1.57746e-11
5.94	1.78997e-11	1.76789e-11	1.75938e-11	1.7091e-11	1.70172e-11	1.68478e-11	1.57716e-11
5.96	1.79026e-11	1.76848e-11	1.75993e-11	1.70918e-11	1.70205e-11	1.68483e-11	1.57758e-11
5.98	1.78931e-11	1.7685e-11	1.75967e-11	1.70959e-11	1.70166e-11	1.68513e-11	1.57659e-11
6	1.78955e-11	1.7681e-11	1.76004e-11	1.709e-11	1.70098e-11	1.68475e-11	1.57749e-11
6.02	1.78984e-11	1.76843e-11	1.75992e-11	1.70842e-11	1.70194e-11	1.68514e-11	1.57692e-11
6.04	1.79076e-11	1.76854e-11	1.75994e-11	1.70959e-11	1.70215e-11	1.68457e-11	1.57582e-11
6.06	1.79067e-11	1.76838e-11	1.75982e-11	1.70936e-11	1.70167e-11	1.68462e-11	1.57726e-11
6.08	1.78953e-11	1.76839e-11	1.76018e-11	1.70896e-11	1.7021e-11	1.68468e-11	1.57675e-11
6.1	1.78961e-11	1.76831e-11	1.75922e-11	1.71033e-11	1.70173e-11	1.68485e-11	1.57712e-11
6.12	1.78975e-11	1.76807e-11	1.75945e-11	1.70972e-11	1.70182e-11	1.68457e-11	1.57814e-11
6.14	1.78948e-11	1.7689e-11	1.76017e-11	1.70925e-11	1.70283e-11	1.68466e-11	1.5779e-11
6.16	1.78992e-11	1.76844e-11	1.7479e-11	1.70945e-11	1.7026e-11	1.68461e-11	1.57899e-11
6.18	1.78933e-11	1.76787e-11	1.72891e-11	1.70945e-11	1.70216e-11	1.6844e-11	1.57689e-11
6.2	1.79001e-11	1.76859e-11	1.72782e-11	1.70871e-11	1.70195e-11	1.68499e-11	1.57748e-11
6.22	1.79014e-11	1.76906e-11	1.72684e-11	1.70921e-11	1.70242e-11	1.68408e-11	1.57615e-11
6.24	1.79006e-11	1.75498e-11	1.72718e-11	1.70871e-11	1.70295e-11	1.6851e-11	1.57671e-11
6.26	1.78988e-11	1.73433e-11	1.72651e-11	1.70929e-11	1.70232e-11	1.68461e-11	1.57605e-11
6.28	1.79012e-11	1.73427e-11	1.72618e-11	1.7096e-11	1.70209e-11	1.6843e-11	1.5775e-11
6.3	1.78969e-11	1.73415e-11	1.72571e-11	1.70927e-11	1.70152e-11	1.68422e-11	1.57707e-11
6.32	1.79038e-11	1.73466e-11	1.72632e-11	1.70845e-11	1.70286e-11	1.68494e-11	1.57648e-11
6.34	1.7895e-11	1.73507e-11	1.72666e-11	1.70832e-11	1.70129e-11	1.68423e-11	1.57693e-11
6.36	1.78981e-11	1.73514e-11	1.72617e-11	1.70914e-11	1.69359e-11	1.68347e-11	1.57706e-11
6.38	1.78979e-11	1.73503e-11	1.7258e-11	1.70896e-11	1.68664e-11	1.68038e-11	1.5761e-11
6.4	1.79004e-11	1.73569e-11	1.7261e-11	1.70814e-11	1.68295e-11	1.67766e-11	1.57589e-11
6.42	1.7903e-11	1.73545e-11	1.72579e-11	1.70025e-11	1.68224e-11	1.67593e-11	1.57743e-11
6.44	1.78989e-11	1.73622e-11	1.72583e-11	1.68783e-11	1.68058e-11	1.6739e-11	1.5765e-11
6.46	1.78904e-11	1.73642e-11	1.72584e-11	1.68412e-11	1.68065e-11	1.6732e-11	1.57779e-11
6.48	1.78952e-11	1.73626e-11	1.72565e-11	1.68364e-11	1.68093e-11	1.67296e-11	1.57766e-11
6.5	1.78935e-11	1.73741e-11	1.72562e-11	1.68342e-11	1.68089e-11	1.67243e-11	1.57768e-11
6.52	1.79048e-11	1.73724e-11	1.72528e-11	1.68346e-11	1.68117e-11	1.67188e-11	1.57799e-11
6.54	1.79096e-11	1.73703e-11	1.72447e-11	1.68367e-11	1.68191e-11	1.67141e-11	1.57686e-11
6.56	1.75587e-11	1.73781e-11	1.72617e-11	1.68299e-11	1.68193e-11	1.67076e-11	1.57726e-11
6.58	1.75377e-11	1.73772e-11	1.72529e-11	1.68391e-11	1.68233e-11	1.67172e-11	1.57763e-11
6.6	1.75398e-11	1.73741e-11	1.72586e-11	1.68423e-11	1.68242e-11	1.67104e-11	1.57789e-11
6.62	1.75431e-11	1.73754e-11	1.72569e-11	1.68323e-11	1.68233e-11	1.67109e-11	1.57677e-11
6.64	1.7541e-11	1.73808e-11	1.72559e-11	1.68435e-11	1.68194e-11	1.67082e-11	1.5768e-11
6.66	1.75372e-11	1.73806e-11	1.7256e-11	1.68329e-11	1.68238e-11	1.67072e-11	1.57785e-11
6.68	1.75484e-11	1.73852e-11	1.72565e-11	1.68461e-11	1.68264e-11	1.67064e-11	1.57786e-11
6.7	1.75416e-11	1.73884e-11	1.72573e-11	1.6849e-11	1.68282e-11	1.67095e-11	1.57624e-11
6.72	1.7543e-11	1.73798e-11	1.72559e-11	1.68473e-11	1.68353e-11	1.67044e-11	1.57656e-11
6.74	1.75447e-11	1.73833e-11	1.72552e-11	1.68477e-11	1.68287e-11	1.67095e-11	1.57758e-11
6.76	1.75535e-11	1.73887e-11	1.72576e-11	1.68523e-11	1.68325e-11	1.67159e-11	1.57744e-11
6.78	1.75571e-11	1.73919e-11	1.72578e-11	1.68558e-11	1.68336e-11	1.67118e-11	1.57711e-11
6.8	1.75538e-11	1.73915e-11	1.72537e-11	1.68522e-11	1.68484e-11	1.67099e-11	1.57624e-11
6.82	1.75528e-11	1.73901e-11	1.72534e-11	1.68492e-11	1.68486e-11	1.67179e-11	1.57672e-11
6.84	1.75593e-11	1.73959e-11	1.72594e-11	1.68519e-11	1.684e-11	1.67111e-11	1.57616e-11
6.86	1.75621e-11	1.73916e-11	1.72555e-11	1.68555e-11	1.6839e-11	1.67111e-11	1.57612e-11
6.88	1.75598e-11	1.73895e-11	1.72545e-11	1.68544e-11	1.68426e-11	1.67145e-11	1.57564e-11
6.9	1.75587e-11	1.73925e-11	1.72529e-11	1.68436e-11	1.68428e-11	1.67135e-11	1.57724e-11
6.92	1.75624e-11	1.73918e-11	1.72622e-11	1.68498e-11	1.68441e-11	1.671e-11	1.57615e-11
6.94	1.75562e-11	1.73877e-11	1.7261e-11	1.68484e-11	1.68485e-11	1.67063e-11	1.57627e-11
6.96	1.75625e-11	1.73971e-11	1.7253e-11	1.68454e-11	1.68428e-11	1.67107e-11	1.57697e-11
6.98	1.75659e-11	1.73963e-11	1.72521e-11	1.68456e-11	1.68409e-11	1.67105e-11	1.57571e-11
7	1.75647e-11	1.73948e-11	1.72518e-11	1.68496e-11	1.68466e-11	1.6713e-11	1.57735e-11
7.02	1.75621e-11	1.73984e-11	1.7253e-11	1.68433e-11	1.68486e-11	1.6711e-11	1.57747e-11
7.04	1.75716e-11	1.74007e-11	1.72584e-11	1.68575e-11	1.68462e-11	1.67149e-11	1.5757e-11
7.06	1.75683e-11	1.73954e-11	1.7248e-11	1.68504e-11	1.68439e-11	1.67084e-11	1.57697e-11
7.08	1.7567e-11	1.73988e-11	1.72522e-11	1.68488e-11	1.68468e-11	1.67085e-11	1.5762e-11
7.1	1.75673e-11	1.73953e-11	1.72543e-11	1.68519e-11	1.68429e-11	1.67103e-11	1.57526e-11
7.12	1.75704e-11	1.74077e-11	1.72551e-11	1.68508e-11	1.6842e-11	1.67059e-11	1.57769e-11
7.14	1.75662e-11	1.73962e-11	1.72505e-11	1.68622e-11	1.6852e-11	1.67083e-11	1.57631e-11
7.16	1.75642e-11	1.74048e-11	1.72483e-11	1.68526e-11	1.68464e-11	1.67058e-11	1.57562e-11
7.18	1.75653e-11	1.74017e-11	1.72575e-11	1.68495e-11	1.68479e-11	1.67007e-11	1.57523e-11
7.2	1.75685e-11	1.73958e-11	1.72456e-11	1.68569e-11	1.68482e-11	1.67085e-11	1.57618e-11
7.22	1.7576e-11	1.74007e-11	1.72479e-11	1.68618e-11	1.68494e-11	1.67059e-11	1.57586e-11
7.24	1.75694e-11	1.74036e-11	1.72546e-11	1.68512e-11	1.68503e-11	1.66997e-11	1.577e-11
7.26	1.75742e-11	1.74032e-11	1.72543e-11	1.68531e-11	1.68457e-11	1.67037e-11	1.57627e-11
7.28	1.75698e-11	1.7401e-11	1.72498e-11	1.68467e-11	1.68525e-11	1.67026e-11	1.57602e-11
7.3	1.7568e-11	1.74025e-11	1.72501e-11	1.6849e-11	1.68491e-11	1.67083e-11	1.57592e-11
7.32	1.75691e-11	1.74e-11	1.7261e-11	1.68491e-11	1.68482e-11	1.67089e-11	1.57459e-11
7.34	1.75755e-11	1.74012e-11	1.72526e-11	1.68573e-11	1.68464e-11	1.67028e-11	1.57631e-11
7.36	1.75728e-11	1.74007e-11	1.72505e-11	1.68523e-11	1.68474e-11	1.6707e-11	1.57718e-11
7.38	1.75731e-11	1.74025e-11	1.72524e-11	1.68492e-11	1.6843e-11	1.67104e-11	1.57591e-11
7.4	1.75725e-11	1.74013e-11	1.72478e-11	1.68498e-11	1.68419e-11	1.67089e-11	1.57543e-11
7.42	1.75764e-11	1.74032e-11	1.72587e-11	1.68489e-11	1.68424e-11	1.66983e-11	1.57612e-11
7.44	1.75685e-11	1.74076e-11	1.72535e-11	1.68547e-11	1.68495e-11	1.66998e-11	1.57733e-11
7.46	1.75726e-11	1.74064e-11	1.72516e-11	1.68558e-11	1.68505e-11	1.67052e-11	1.5773e-11
7.48	1.75698e-11	1.74011e-11	1.72486e-11	1.68523e-11	1.6852e-11	1.67084e-11	1.57658e-11
7.5	1.75709e-11	1.73972e-11	1.72497e-11	1.685e-11	1.68492e-11	1.67076e-11	1.576e-11
7.52	1.75771e-11	1.74033e-11	1.72468e-11	1.68511e-11	1.68507e-11	1.67013e-11	1.57575e-11
7.54	1.75762e-11	1.74097e-11	1.72506e-11	1.68465e-11	1.68485e-11	1.67015e-11	1.57638e-11
7.56	1.75769e-11	1.74076e-11	1.72525e-11	1.68479e-11	1.68525e-11	1.6702e-11	1.57569e-11
7.58	1.75671e-11	1.74096e-11	1.72423e-11	1.68439e-11	1.68501e-11	1.67014e-11	1.57691e-11
7.6	1.75782e-11	1.74068e-11	1.72487e-11	1.68535e-11	1.68437e-11	1.6711e-11	1.57761e-11
7.62	1.7568e-11	1.74094e-11	1.72489e-11	1.68503e-11	1.6852e-11	1.67015e-11	1.57675e-11
7.64	1.75686e-11	1.74117e-11	1.72508e-11	1.68538e-11	1.68526e-11	1.67018e-11	1.57694e-11
7.66	1.75751e-11	1.74069e-11	1.72495e-11	1.68494e-11	1.68509e-11	1.67036e-11	1.576e-11
7.68	1.75715e-11	1.74084e-11	1.72542e-11	1.68439e-11	1.68606e-11	1.67018e-11	1.5771e-11
7.7	1.75732e-11	1.74028e-11	1.72513e-11	1.6845e-11	1.68545e-11	1.66987e-11	1.57613e-11
7.72	1.75731e-11	1.74075e-11	1.72479e-11	1.68442e-11	1.68547e-11	1.67002e-11	1.57791e-11
7.74	1.75725e-11	1.74147e-11	1.72482e-11	1.68454e-11	1.68545e-11	1.66939e-11	1.57515e-11
7.76	1.75733e-11	1.74046e-11	1.72503e-11	1.68465e-11	1.68556e-11	1.67013e-11	1.57644e-11
7.78	1.75826e-11	1.7408e-11	1.72543e-11	1.68479e-11	1.68551e-11	1.67085e-11	1.57603e-11
7.8	1.75724e-11	1.74071e-11	1.72517e-11	1.68424e-11	1.68656e-11	1.67011e-11	1.57619e-11
7.82	1.75767e-11	1.74092e-11	1.72485e-11	1.68438e-11	1.68537e-11	1.67015e-11	1.57733e-11
7.84	1.75734e-11	1.74116e-11	1.72475e-11	1.68458e-11	1.68617e-11	1.67025e-11	1.57589e-11
7.86	1.7572e-11	1.74117e-11	1.72467e-11	1.6851e-11	1.68536e-11	1.67062e-11	1.57719e-11
7.88	1.75764e-11	1.74099e-11	1.72475e-11	1.68594e-11	1.68529e-11	1.67043e-11	1.5778e-11
7.9	1.75757e-11	1.74025e-11	1.72499e-11	1.6859e-11	1.68536e-11	1.67085e-11	1.57749e-11
7.92	1.75683e-11	1.74125e-11	1.72448e-11	1.68498e-11	1.6852e-11	1.67045e-11	1.5778e-11
7.94	1.75766e-11	1.74124e-11	1.72437e-11	1.68517e-11	1.68534e-11	1.66974e-11	1.57798e-11
7.96	1.75789e-11	1.74102e-11	1.72454e-11	1.68535e-11	1.68561e-11	1.67033e-11	1.57589e-11
7.98	1.75803e-11	1.74067e-11	1.72427e-11	1.68473e-11	1.6854e-11	1.66978e-11	1.57617e-11
8	1.75812e-11	1.74092e-11	1.7248e-11	1.68461e-11	1.6858e-11	1.66946e-11	1.57625e-11
8.02	1.75794e-11	1.74145e-11	1.72484e-11	1.68522e-11	1.68538e-11	1.66972e-11	1.57805e-11
8.04	1.758e-11	1.7419e-11	1.72531e-11	1.68473e-11	1.68478e-11	1.66982e-11	1.57698e-11
8.06	1.75753e-11	1.74134e-11	1.72424e-11	1.68448e-11	1.68525e-11	1.66967e-11	1.57755e-11
8.08	1.75766e-11	1.74131e-11	1.72428e-11	1.68534e-11	1.68565e-11	1.66913e-11	1.57713e-11
8.1	1.75792e-11	1.74149e-11	1.72444e-11	1.68405e-11	1.68483e-11	1.66967e-11	1.57794e-11
8.12	1.75797e-11	1.74135e-11	1.72499e-11	1.68483e-11	1.68652e-11	1.66881e-11	1.57687e-11
8.14	1.75858e-11	1.74155e-11	1.72417e-11	1.68469e-11	1.68493e-11	1.66931e-11	1.57611e-11
8.16	1.75817e-11	1.74148e-11	1.72398e-11	1.68552e-11	1.68478e-11	1.6695e-11	1.57779e-11
8.18	1.75837e-11	1.74154e-11	1.72515e-11	1.685e-11	1.68547e-11	1.66826e-11	1.57623e-11
8.2	1.75881e-11	1.7412e-11	1.72475e-11	1.68499e-11	1.68577e-11	1.66911e-11	1.57707e-11
8.22	1.75813e-11	1.74121e-11	1.72467e-11	1.68447e-11	1.68565e-11	1.66923e-11	1.57808e-11
8.24	1.7583e-11	1.74224e-11	1.7244e-11	1.68424e-11	1.68572e-11	1.66998e-11	1.57726e-11
8.26	1.75915e-11	1.74127e-11	1.72426e-11	1.68415e-11	1.68567e-11	1.66831e-11	1.57657e-11
8.28	1.75828e-11	1.74148e-11	1.72446e-11	1.68486e-11	1.68538e-11	1.66928e-11	1.57618e-11
8.3	1.75825e-11	1.74207e-11	1.72479e-11	1.68486e-11	1.68534e-11	1.66834e-11	1.57609e-11
8.32	1.75805e-11	1.74228e-11	1.72449e-11	1.68558e-11	1.68465e-11	1.66832e-11	1.57444e-11
8.34	1.75858e-11	1.74214e-11	1.72435e-11	1.68517e-11	1.68544e-11	1.6681e-11	1.57589e-11
8.36	1.75846e-11	1.74174e-11	1.72427e-11	1.68526e-11	1.68494e-11	1.66877e-11	1.57674e-11
8.38	1.75817e-11	1.74119e-11	1.72445e-11	1.6854e-11	1.68549e-11	1.66824e-11	1.575e-11
8.4	1.75854e-11	1.74166e-11	1.72462e-11	1.68525e-11	1.68575e-11	1.66858e-11	1.57575e-11
8.42	1.75815e-11	1.74161e-11	1.72418e-11	1.68521e-11	1.68642e-11	1.66967e-11	1.57605e-11
8.44	1.7585e-11	1.7417e-11	1.72402e-11	1.68462e-11	1.68625e-11	1.66886e-11	1.57516e-11
8.46	1.75865e-11	1.74214e-11	1.72456e-11	1.68481e-11	1.68493e-11	1.66895e-11	1.57548e-11
8.48	1.75936e-11	1.7422e-11	1.72454e-11	1.68539e-11	1.68551e-11	1.66944e-11	1.57455e-11
8.5	1.75934e-11	1.74226e-11	1.72435e-11	1.68471e-11	1.68564e-11	1.66878e-11	1.57336e-11
8.52	1.759e-11	1.7419e-11	1.72451e-11	1.6845e-11	1.68562e-11	1.66915e-11	1.57524e-11
8.54	1.75899e-11	1.74174e-11	1.72423e-11	1.68477e-11	1.68581e-11	1.66864e-11	1.57478e-11
8.56	1.75909e-11	1.74183e-11	1.72404e-11	1.685e-11	1.68568e-11	1.66898e-11	1.57396e-11
8.58	1.75893e-11	1.74287e-11	1.72401e-11	1.68496e-11	1.68597e-11	1.66872e-11	1.57622e-11
8.6	1.75851e-11	1.74273e-11	1.72385e-11	1.68629e-11	1.68629e-11	1.66897e-11	1.57375e-11
8.62	1.75881e-11	1.74266e-11	1.72398e-11	1.68519e-11	1.68613e-11	1.66911e-11	1.5764e-11
8.64	1.75879e-11	1.74274e-11	1.72363e-11	1.68618e-11	1.68589e-11	1.66876e-11	1.57693e-11
8.66	1.75878e-11	1.7424e-11	1.72376e-11	1.68484e-11	1.68558e-11	1.66815e-11	1.57762e-11
8.68	1.75921e-11	1.74221e-11	1.72356e-11	1.68528e-11	1.6854e-11	1.66849e-11	1.57817e-11
8.7	1.75942e-11	1.74222e-11	1.72401e-11	1.68482e-11	1.6856e-11	1.66921e-11	1.57842e-11
8.72	1.75877e-11	1.7423e-11	1.7242e-11	1.68581e-11	1.68534e-11	1.66929e-11	1.57689e-11
8.74	1.75856e-11	1.74173e-11	1.72466e-11	1.68542e-11	1.68557e-11	1.66916e-11	1.57588e-11
8.76	1.75871e-11	1.74229e-11	1.72433e-11	1.68576e-11	1.68554e-11	1.66956e-11	1.57618e-11
8.78	1.75965e-11	1.74227e-11	1.72447e-11	1.68593e-11	1.68565e-11	1.66942e-11	1.57726e-11
8.8	1.75854e-11	1.74212e-11	1.72385e-11	1.68601e-11	1.68602e-11	1.6687e-11	1.57605e-11
8.82	1.75881e-11	1.74257e-11	1.72433e-11	1.68582e-11	1.6859e-11	1.66831e-11	1.57513e-11
8.84	1.75904e-11	1.74219e-11	1.72376e-11	1.68613e-11	1.6856e-11	1.66918e-11	1.57682e-11
8.86	1.75946e-11	1.74156e-11	1.72417e-11	1.68503e-11	1.68553e-11	1.6684e-11	1.57537e-11
8.88	1.7586e-11	1.742e-11	1.72447e-11	1.68538e-11	1.68565e-11	1.66873e-11	1.57486e-11
8.9	1.75852e-11	1.74261e-11	1.72365e-11	1.68513e-11	1.68554e-11	1.66992e-11	1.5747e-11
8.92	1.75896e-11	1.74229e-11	1.7242e-11	1.68598e-11	1.68552e-11	1.66873e-11	1.57598e-11
8.94	1.75873e-11	1.74264e-11	1.72343e-11	1.68575e-11	1.68565e-11	1.66886e-11	1.57573e-11
8.96	1.75922e-11	1.7419e-11	1.72393e-11	1.68579e-11	1.68572e-11	1.66941e-11	1.57498e-11
8.98	1.75895e-11	1.74228e-11	1.72376e-11	1.68487e-11	1.68623e-11	1.66932e-11	1.57568e-11
9	1.75917e-11	1.74235e-11	1.72427e-11	1.68461e-11	1.68604e-11	1.66955e-11	1.57525e-11
9.02	1.75881e-11	1.74223e-11	1.72426e-11	1.6845e-11	1.68587e-11	1.66872e-11	1.57596e-11
9.04	1.75935e-11	1.74238e-11	1.72362e-11	1.68434e-11	1.68544e-11	1.66894e-11	1.57635e-11
9.06	1.7595e-11	1.74287e-11	1.72422e-11	1.68461e-11	1.68671e-11	1.66888e-11	1.57686e-11
9.08	1.75933e-11	1.74295e-11	1.7236e-11	1.68432e-11	1.68568e-11	1.66867e-11	1.57741e-11
9.1	1.75952e-11	1.74252e-11	1.72431e-11	1.68461e-11	1.68647e-11	1.66845e-11	1.5771e-11
9.12	1.7593e-11	1.74214e-11	1.72363e-11	1.68424e-11	1.68592e-11	1.66817e-11	1.57778e-11
9.14	1.75965e-11	1.74271e-11	1.72369e-11	1.68423e-11	1.68568e-11	1.66905e-11	1.57593e-11
9.16	1.75907e-11	1.74203e-11	1.72411e-11	1.6846e-11	1.68661e-11	1.66969e-11	1.57656e-11
9.18	1.75944e-11	1.74213e-11	1.72373e-11	1.68451e-11	1.68562e-11	1.66867e-11	1.57494e-11
9.2	1.75954e-11	1.74224e-11	1.7237e-11	1.68551e-11	1.6857e-11	1.66848e-11	1.5752e-11
9.22	1.75965e-11	1.74268e-11	1.72371e-11	1.68603e-11	1.68686e-11	1.66862e-11	1.5767e-11
9.24	1.75953e-11	1.74272e-11	1.72352e-11	1.68605e-11	1.68546e-11	1.66839e-11	1.57537e-11
9.26	1.75958e-11	1.74326e-11	1.72307e-11	1.68578e-11	1.68641e-11	1.66852e-11	1.57625e-11
9.28	1.75926e-11	1.7429e-11	1.72345e-11	1.68537e-11	1.68648e-11	1.66818e-11	1.576e-11
9.3	1.76006e-11	1.7428e-11	1.72403e-11	1.6858e-11	1.68728e-11	1.66847e-11	1.57554e-11
9.32	1.75999e-11	1.74281e-11	1.72407e-11	1.68564e-11	1.68618e-11	1.66786e-11	1.57713e-11
9.34	1.76012e-11	1.74262e-11	1.72415e-11	1.68567e-11	1.68613e-11	1.66867e-11	1.57649e-11
9.36	1.75967e-11	1.74241e-11	1.72381e-11	1.68603e-11	1.68664e-11	1.66853e-11	1.57604e-11
9.38	1.75984e-11	1.74254e-11	1.72381e-11	1.6863e-11	1.68583e-11	1.66894e-11	1.57456e-11
9.4	1.76001e-11	1.74247e-11	1.72347e-11	1.68605e-11	1.68629e-11	1.66876e-11	1.57456e-11
9.42	1.75961e-11	1.74302e-11	1.72291e-11	1.68604e-11	1.68706e-11	1.66891e-11	1.57631e-11
9.44	1.75988e-11	1.74228e-11	1.72329e-11	1.68607e-11	1.68697e-11	1.66922e-11	1.57529e-11
9.46	1.75995e-11	1.74267e-11	1.72399e-11	1.68584e-11	1.68638e-11	1.66884e-11	1.57857e-11
9.48	1.75898e-11	1.74287e-11	1.7232e-11	1.6859e-11	1.68623e-11	1.66899e-11	1.5758e-11
9.5	1.75975e-11	1.74311e-11	1.72282e-11	1.68575e-11	1.6862e-11	1.66744e-11	1.57631e-11
9.52	1.75987e-11	1.74314e-11	1.72343e-11	1.6862e-11	1.687e-11	1.66743e-11	1.57577e-11
9.54	1.76019e-11	1.74275e-11	1.72283e-11	1.68631e-11	1.68658e-11	1.66838e-11	1.57581e-11
9.56	1.75987e-11	1.74288e-11	1.72374e-11	1.68601e-11	1.6866e-11	1.6681e-11	1.57487e-11
9.58	1.75979e-11	1.7432e-11	1.72358e-11	1.68634e-11	1.68697e-11	1.66767e-11	1.57611e-11
9.6	1.75942e-11	1.74322e-11	1.72297e-11	1.68597e-11	1.68688e-11	1.66709e-11	1.57695e-11
9.62	1.75947e-11	1.74281e-11	1.72341e-11	1.68573e-11	1.68685e-11	1.66754e-11	1.57689e-11
9.64	1.75948e-11	1.7426e-11	1.72399e-11	1.68587e-11	1.68712e-11	1.66775e-11	1.57578e-11
9.66	1.75949e-11	1.74292e-11	1.7228e-11	1.6861e-11	1.6867e-11	1.66737e-11	1.57523e-11
9.68	1.75933e-11	1.74271e-11	1.72322e-11	1.68606e-11	1.6871e-11	1.66782e-11	1.57535e-11
9.7	1.75989e-11	1.74283e-11	1.72276e-11	1.68677e-11	1.68623e-11	1.66741e-11	1.57591e-11
9.72	1.75955e-11	1.74278e-11	1.72341e-11	1.68651e-11	1.68641e-11	1.66749e-11	1.57647e-11
9.74	1.7601e-11	1.74279e-11	1.72387e-11	1.68668e-11	1.68632e-11	1.66742e-11	1.57701e-11
9.76	1.7594e-11	1.74318e-11	1.72326e-11	1.68651e-11	1.68652e-11	1.66818e-11	1.5759e-11
9.78	1.75981e-11	1.74316e-11	1.72322e-11	1.68639e-11	1.68708e-11	1.66858e-11	1.57676e-11
9.8	1.75972e-11	1.74311e-11	1.7232e-11	1.68617e-11	1.68685e-11	1.66781e-11	1.5781e-11
9.82	1.75962e-11	1.74338e-11	1.7234e-11	1.68679e-11	1.68656e-11	1.66841e-11	1.57677e-11
9.84	1.75881e-11	1.74285e-11	1.72367e-11	1.68666e-11	1.68736e-11	1.66789e-11	1.57748e-11
9.86	1.75915e-11	1.74287e-11	1.72359e-11	1.68635e-11	1.68638e-11	1.66814e-11	1.57816e-11
9.88	1.7597e-11	1.74351e-11	1.72321e-11	1.68631e-11	1.68684e-11	1.66854e-11	1.5782e-11
9.9	1.7598e-11	1.74307e-11	1.72358e-11	1.68619e-11	1.6871e-11	1.66816e-11	1.57665e-11
9.92	1.75971e-11	1.74278e-11	1.72373e-11	1.68606e-11	1.68667e-11	1.66836e-11	1.57843e-11
9.94	1.75943e-11	1.74262e-11	1.72407e-11	1.68673e-11	1.68687e-11	1.66816e-11	1.57722e-11
9.96	1.75945e-11	1.74282e-11	1.72328e-11	1.68677e-11	1.68711e-11	1.6682e-11	1.57823e-11
9.98	1.7597e-11	1.74297e-11	1.72256e-11	1.68595e-11	1.68702e-11	1.66372e-11	1.57672e-11
10	1.76029e-11	1.74296e-11	1.72308e-11	1.68691e-11	1.68655e-11	1.66501e-11	1.57617e-11
10.02	1.75922e-11	1.74295e-11	1.72332e-11	1.68624e-11	1.68634e-11	1.66523e-11	1.57593e-11
10.04	1.7602e-11	1.74256e-11	1.72326e-11	1.68696e-11	1.68642e-11	1.66633e-11	1.57696e-11
10.06	1.76044e-11	1.74312e-11	1.72281e-11	1.68609e-11	1.68749e-11	1.66599e-11	1.57764e-11
10.08	1.75926e-11	1.74309e-11	1.72367e-11	1.68646e-11	1.68714e-11	1.66607e-11	1.57989e-11
10.1	1.75986e-11	1.74271e-11	1.72349e-11	1.68647e-11	1.68647e-11	1.6661e-11	1.57963e-11
10.12	1.76007e-11	1.74289e-11	1.72364e-11	1.68699e-11	1.68592e-11	1.66687e-11	1.57991e-11
10.14	1.76046e-11	1.74304e-11	1.72324e-11	1.68647e-11	1.68706e-11	1.66695e-11	1.57938e-11
10.16	1.76029e-11	1.74347e-11	1.72384e-11	1.68622e-11	1.68668e-11	1.66695e-11	1.57811e-11
10.18	1.7599e-11	1.74302e-11	1.72366e-11	1.68692e-11	1.68772e-11	1.6671e-11	1.5782e-11
10.2	1.76019e-11	1.74304e-11	1.7239e-11	1.68668e-11	1.68743e-11	1.66614e-11	1.57789e-11
10.22	1.76085e-11	1.74337e-11	1.72334e-11	1.68685e-11	1.68756e-11	1.66662e-11	1.57983e-11
10.24	1.76068e-11	1.74301e-11	1.72351e-11	1.68643e-11	1.68769e-11	1.66642e-11	1.57802e-11
10.26	1.7603e-11	1.74294e-11	1.72323e-11	1.68626e-11	1.68681e-11	1.66674e-11	1.5778e-11
10.28	1.76015e-11	1.74291e-11	1.72348e-11	1.68612e-11	1.68688e-11	1.66715e-11	1.57933e-11
10.3	1.76024e-11	1.74315e-11	1.7233e-11	1.68693e-11	1.68693e-11	1.66739e-11	1.5794e-11
10.32	1.75958e-11	1.74271e-11	1.72328e-11	1.68605e-11	1.68771e-11	1.66721e-11	1.5786e-11
10.34	1.76038e-11	1.74355e-11	1.7227e-11	1.68684e-11	1.68733e-11	1.66745e-11	1.57915e-11
10.36	1.76023e-11	1.74324e-11	1.72331e-11	1.68661e-11	1.6884e-11	1.66716e-11	1.57827e-11
10.38	1.76017e-11	1.74276e-11	1.7234e-11	1.68629e-11	1.68662e-11	1.66671e-11	1.57831e-11
10.4	1.76014e-11	1.74302e-11	1.72297e-11	1.68607e-11	1.68778e-11	1.66741e-11	1.57696e-11
10.42	1.76051e-11	1.74321e-11	1.72272e-11	1.68675e-11	1.68642e-11	1.66699e-11	1.57841e-11
10.44	1.7599e-11	1.74385e-11	1.72335e-11	1.68632e-11	1.68824e-11	1.66716e-11	1.57757e-11
10.46	1.76025e-11	1.74317e-11	1.72285e-11	1.68642e-11	1.68777e-11	1.6663e-11	1.57801e-11
10.48	1.76043e-11	1.74328e-11	1.72306e-11	1.68603e-11	1.68808e-11	1.66635e-11	1.57816e-11
10.5	1.75996e-11	1.74356e-11	1.72341e-11	1.68625e-11	1.68834e-11	1.66681e-11	1.57853e-11
10.52	1.76008e-11	1.74285e-11	1.72345e-11	1.68623e-11	1.68812e-11	1.66664e-11	1.57851e-11
10.54	1.76036e-11	1.74336e-11	1.72349e-11	1.68694e-11	1.68848e-11	1.6667e-11	1.57948e-11
10.56	1.75975e-11	1.74368e-11	1.72354e-11	1.68553e-11	1.68742e-11	1.66693e-11	1.57725e-11
10.58	1.76023e-11	1.74272e-11	1.72334e-11	1.68676e-11	1.68686e-11	1.66694e-11	1.57795e-11
10.6	1.76041e-11	1.74255e-11	1.72159e-11	1.6862e-11	1.68741e-11	1.66692e-11	1.57724e-11
10.62	1.76078e-11	1.74316e-11	1.72208e-11	1.68698e-11	1.6874e-11	1.66649e-11	1.57703e-11
10.64	1.7606e-11	1.74308e-11	1.72251e-11	1.68606e-11	1.68844e-11	1.66794e-11	1.57772e-11
10.66	1.7605e-11	1.74296e-11	1.72255e-11	1.68725e-11	1.68838e-11	1.66679e-11	1.57727e-11
10.68	1.76054e-11	1.74327e-11	1.72259e-11	1.6868e-11	1.68773e-11	1.6667e-11	1.57868e-11
10.7	1.76051e-11	1.74318e-11	1.72204e-11	1.68674e-11	1.6881e-11	1.66681e-11	1.57876e-11
10.72	1.76076e-11	1.74326e-11	1.72221e-11	1.68655e-11	1.68732e-11	1.6672e-11	1.57822e-11
10.74	1.75996e-11	1.74299e-11	1.72247e-11	1.68698e-11	1.68731e-11	1.66673e-11	1.57856e-11
10.76	1.76036e-11	1.74288e-11	1.72254e-11	1.68608e-11	1.68862e-11	1.666e-11	1.57657e-11
10.78	1.76046e-11	1.74264e-11	1.72265e-11	1.68652e-11	1.68887e-11	1.66645e-11	1.57642e-11
10.8	1.76031e-11	1.74311e-11	1.72208e-11	1.68656e-11	1.6882e-11	1.66704e-11	1.57747e-11
10.82	1.76021e-11	1.74362e-11	1.72246e-11	1.68723e-11	1.68808e-11	1.66739e-11	1.57636e-11
10.84	1.76045e-11	1.7432e-11	1.72201e-11	1.68624e-11	1.68765e-11	1.66594e-11	1.57598e-11
10.86	1.76039e-11	1.74265e-11	1.72209e-11	1.68727e-11	1.68844e-11	1.66639e-11	1.57592e-11
10.88	1.75987e-11	1.74308e-11	1.72215e-11	1.6867e-11	1.68812e-11	1.66611e-11	1.57537e-11
10.9	1.76082e-11	1.74287e-11	1.72243e-11	1.68654e-11	1.68761e-11	1.6657e-11	1.57632e-11
10.92	1.76071e-11	1.74313e-11	1.72199e-11	1.68692e-11	1.68836e-11	1.66609e-11	1.57609e-11
10.94	1.76045e-11	1.74335e-11	1.72229e-11	1.6868e-11	1.68857e-11	1.66597e-11	1.57702e-11
10.96	1.76052e-11	1.7431e-11	1.72243e-11	1.68664e-11	1.68812e-11	1.66637e-11	1.57545e-11
10.98	1.76073e-11	1.74347e-11	1.7225e-11	1.68692e-11	1.68816e-11	1.66619e-11	1.57463e-11
11	1.76026e-11	1.74385e-11	1.72263e-11	1.6868e-11	1.68818e-11	1.6662e-11	1.57574e-11
11.02	1.76061e-11	1.74281e-11	1.72274e-11	1.68657e-11	1.68823e-11	1.66651e-11	1.57594e-11
11.04	1.76009e-11	1.74327e-11	1.72282e-11	1.68649e-11	1.68864e-11	1.66618e-11	1.57691e-11
11.06	1.75991e-11	1.74361e-11	1.72267e-11	1.68652e-11	1.68866e-11	1.66605e-11	1.5774e-11
11.08	1.76073e-11	1.74329e-11	1.72252e-11	1.68678e-11	1.68842e-11	1.66677e-11	1.57605e-11
11.1	1.76045e-11	1.74284e-11	1.72277e-11	1.68688e-11	1.68852e-11	1.66732e-11	1.57535e-11
11.12	1.76051e-11	1.74307e-11	1.72277e-11	1.68745e-11	1.68802e-11	1.66768e-11	1.57463e-11
11.14	1.76069e-11	1.74289e-11	1.72339e-11	1.68728e-11	1.6888e-11	1.66842e-11	1.57638e-11
11.16	1.76086e-11	1.74372e-11	1.72241e-11	1.68698e-11	1.68889e-11	1.66743e-11	1.57617e-11
11.18	1.76036e-11	1.74311e-11	1.72329e-11	1.68754e-11	1.68845e-11	1.66765e-11	1.57505e-11
11.2	1.76088e-11	1.74397e-11	1.72266e-11	1.6875e-11	1.68871e-11	1.66765e-11	1.57653e-11
11.22	1.76009e-11	1.74376e-11	1.72299e-11	1.6871e-11	1.68837e-11	1.66707e-11	1.57587e-11
11.24	1.76015e-11	1.74355e-11	1.72352e-11	1.68738e-11	1.68846e-11	1.66715e-11	1.57485e-11
11.26	1.76094e-11	1.74378e-11	1.72322e-11	1.68736e-11	1.68806e-11	1.667e-11	1.57487e-11
11.28	1.76085e-11	1.74327e-11	1.72305e-11	1.6874e-11	1.68903e-11	1.66593e-11	1.5744e-11
11.3	1.76044e-11	1.74361e-11	1.72265e-11	1.68807e-11	1.68811e-11	1.66651e-11	1.57505e-11
11.32	1.76007e-11	1.74366e-11	1.72282e-11	1.68765e-11	1.68943e-11	1.66717e-11	1.57518e-11
11.34	1.76018e-11	1.74397e-11	1.72286e-11	1.68768e-11	1.6879e-11	1.66654e-11	1.57395e-11
11.36	1.76069e-11	1.74384e-11	1.72308e-11	1.68833e-11	1.68848e-11	1.66656e-11	1.57689e-11
11.38	1.76066e-11	1.7433e-11	1.72255e-11	1.68828e-11	1.68783e-11	1.66643e-11	1.57549e-11
11.4	1.76077e-11	1.74296e-11	1.72269e-11	1.68736e-11	1.68935e-11	1.6665e-11	1.57574e-11
11.42	1.7605e-11	1.74328e-11	1.72323e-11	1.68789e-11	1.6893e-11	1.66669e-11	1.57574e-11
11.44	1.76041e-11	1.74411e-11	1.72283e-11	1.68679e-11	1.68893e-11	1.66629e-11	1.57444e-11
11.46	1.76058e-11	1.74389e-11	1.72306e-11	1.68769e-11	1.68912e-11	1.66566e-11	1.576e-11
11.48	1.76064e-11	1.74347e-11	1.72313e-11	1.68686e-11	1.68809e-11	1.6651e-11	1.57606e-11
11.5	1.76099e-11	1.74389e-11	1.72269e-11	1.68812e-11	1.68845e-11	1.66588e-11	1.57557e-11
11.52	1.76085e-11	1.74412e-11	1.72249e-11	1.68723e-11	1.68824e-11	1.66731e-11	1.57561e-11
11.54	1.76097e-11	1.74419e-11	1.72265e-11	1.68726e-11	1.68887e-11	1.66627e-11	1.57502e-11
11.56	1.76065e-11	1.74369e-11	1.72247e-11	1.68773e-11	1.68869e-11	1.66649e-11	1.57485e-11
11.58	1.76057e-11	1.74334e-11	1.72298e-11	1.68729e-11	1.68954e-11	1.66621e-11	1.57606e-11
11.6	1.76031e-11	1.74345e-11	1.72278e-11	1.68715e-11	1.68853e-11	1.66678e-11	1.57582e-11
11.62	1.76071e-11	1.74378e-11	1.7225e-11	1.68711e-11	1.6891e-11	1.66682e-11	1.5749e-11
11.64	1.75991e-11	1.74359e-11	1.72269e-11	1.68735e-11	1.68873e-11	1.66685e-11	1.5761e-11
11.66	1.76067e-11	1.74395e-11	1.72277e-11	1.68729e-11	1.68864e-11	1.66686e-11	1.57498e-11
11.68	1.7604e-11	1.74365e-11	1.72293e-11	1.68709e-11	1.6891e-11	1.66655e-11	1.57472e-11
11.7	1.76094e-11	1.744e-11	1.72308e-11	1.68694e-11	1.68745e-11	1.66763e-11	1.57573e-11
11.72	1.76086e-11	1.74336e-11	1.72269e-11	1.68817e-11	1.68733e-11	1.66786e-11	1.57616e-11
11.74	1.76001e-11	1.74283e-11	1.72294e-11	1.68839e-11	1.68759e-11	1.66666e-11	1.57514e-11
11.76	1.7606e-11	1.74348e-11	1.72259e-11	1.68787e-11	1.68701e-11	1.6673e-11	1.57404e-11
11.78	1.76004e-11	1.74392e-11	1.72279e-11	1.68788e-11	1.68813e-11	1.6678e-11	1.57499e-11
11.8	1.76064e-11	1.74422e-11	1.72234e-11	1.6881e-11	1.68776e-11	1.66746e-11	1.5751e-11
11.82	1.76038e-11	1.74357e-11	1.72304e-11	1.68784e-11	1.68746e-11	1.66703e-11	1.57652e-11
11.84	1.76066e-11	1.74378e-11	1.72201e-11	1.68797e-11	1.68885e-11	1.66713e-11	1.57434e-11
11.86	1.76095e-11	1.7436e-11	1.72282e-11	1.68794e-11	1.68812e-11	1.66663e-11	1.57662e-11
11.88	1.76085e-11	1.74386e-11	1.72242e-11	1.68856e-11	1.68775e-11	1.66716e-11	1.57788e-11
11.9	1.76074e-11	1.74419e-11	1.72221e-11	1.68737e-11	1.68772e-11	1.66652e-11	1.5765e-11
11.92	1.76131e-11	1.74402e-11	1.72222e-11	1.68808e-11	1.68755e-11	1.66637e-11	1.57768e-11
11.94	1.76071e-11	1.74344e-11	1.72179e-11	1.68796e-11	1.6876e-11	1.6677e-11	1.57443e-11
11.96	1.76145e-11	1.74336e-11	1.72242e-11	1.68732e-11	1.68821e-11	1.66656e-11	1.57485e-11
11.98	1.7609e-11	1.74387e-11	1.72219e-11	1.68704e-11	1.6874e-11	1.6674e-11	1.57537e-11
12	1.76101e-11	1.74355e-11	1.72215e-11	1.6879e-11	1.68793e-11	1.66686e-11	1.57518e-11
12.02	1.76082e-11	1.74441e-11	1.72264e-11	1.68729e-11	1.68794e-11	1.66705e-11	1.57461e-11
12.04	1.76074e-11	1.7442e-11	1.72209e-11	1.6885e-11	1.68767e-11	1.66733e-11	1.57666e-11
12.06	1.76053e-11	1.74395e-11	1.72266e-11	1.68792e-11	1.68799e-11	1.66647e-11	1.57624e-11
12.08	1.76077e-11	1.74367e-11	1.7218e-11	1.68778e-11	1.68833e-11	1.66672e-11	1.57405e-11
12.1	1.76104e-11	1.74419e-11	1.72214e-11	1.68871e-11	1.68835e-11	1.66731e-11	1.57535e-11
12.12	1.76093e-11	1.74384e-11	1.72199e-11	1.68762e-11	1.68792e-11	1.66745e-11	1.57499e-11
12.14	1.76108e-11	1.74395e-11	1.72246e-11	1.68819e-11	1.68875e-11	1.66712e-11	1.57513e-11
12.16	1.761e-11	1.74339e-11	1.72187e-11	1.68813e-11	1.68843e-11	1.66711e-11	1.57418e-11
12.18	1.76147e-11	1.74365e-11	1.72298e-11	1.68802e-11	1.68892e-11	1.66711e-11	1.57467e-11
12.2	1.76086e-11	1.74383e-11	1.72174e-11	1.68828e-11	1.68886e-11	1.66758e-11	1.57461e-11
12.22	1.7608e-11	1.74383e-11	1.72193e-11	1.68807e-11	1.68922e-11	1.66818e-11	1.57515e-11
12.24	1.76144e-11	1.7431e-11	1.72176e-11	1.68817e-11	1.68792e-11	1.66685e-11	1.57447e-11
12.26	1.76124e-11	1.74362e-11	1.72163e-11	1.68816e-11	1.68865e-11	1.66752e-11	1.57602e-11
12.28	1.76099e-11	1.7436e-11	1.7215e-11	1.68767e-11	1.68865e-11	1.66741e-11	1.57667e-11
12.3	1.76074e-11	1.74338e-11	1.72147e-11	1.68811e-11	1.6884e-11	1.66655e-11	1.57581e-11
12.32	1.76152e-11	1.74365e-11	1.72196e-11	1.68818e-11	1.68815e-11	1.6677e-11	1.57468e-11
12.34	1.7612e-11	1.7438e-11	1.72194e-11	1.68798e-11	1.68874e-11	1.66681e-11	1.57497e-11
12.36	1.76089e-11	1.74365e-11	1.722e-11	1.68782e-11	1.68892e-11	1.66737e-11	1.5765e-11
12.38	1.76119e-11	1.74336e-11	1.72151e-11	1.68805e-11	1.68937e-11	1.66744e-11	1.57622e-11
12.4	1.76147e-11	1.74401e-11	1.72128e-11	1.68825e-11	1.68853e-11	1.66732e-11	1.57307e-11
12.42	1.7615e-11	1.74369e-11	1.72206e-11	1.68851e-11	1.68866e-11	1.66688e-11	1.57611e-11
12.44	1.76189e-11	1.74369e-11	1.72213e-11	1.68772e-11	1.68888e-11	1.66721e-11	1.57448e-11
12.46	1.76084e-11	1.74359e-11	1.72196e-11	1.68871e-11	1.68778e-11	1.66751e-11	1.57297e-11
12.48	1.76123e-11	1.74407e-11	1.72226e-11	1.68849e-11	1.68752e-11	1.66757e-11	1.57468e-11
12.5	1.76146e-11	1.74364e-11	1.72277e-11	1.68926e-11	1.68765e-11	1.6674e-11	1.57425e-11
12.52	1.76152e-11	1.74369e-11	1.72179e-11	1.6889e-11	1.68794e-11	1.66736e-11	1.57348e-11
12.54	1.76077e-11	1.74383e-11	1.72202e-11	1.68825e-11	1.6891e-11	1.66785e-11	1.57329e-11
12.56	1.76135e-11	1.74352e-11	1.72197e-11	1.68842e-11	1.68862e-11	1.66702e-11	1.57449e-11
12.58	1.76083e-11	1.74429e-11	1.72248e-11	1.68815e-11	1.68791e-11	1.66703e-11	1.57371e-11
12.6	1.76091e-11	1.74419e-11	1.72242e-11	1.68797e-11	1.68882e-11	1.66672e-11	1.57448e-11
12.62	1.76079e-11	1.74409e-11	1.72219e-11	1.68833e-11	1.68705e-11	1.66614e-11	1.57389e-11
12.64	1.76093e-11	1.74384e-11	1.72171e-11	1.68826e-11	1.68769e-11	1.66687e-11	1.57453e-11
12.66	1.76107e-11	1.74451e-11	1.72233e-11	1.68835e-11	1.68847e-11	1.66723e-11	1.57548e-11
12.68	1.76121e-11	1.74379e-11	1.72238e-11	1.68755e-11	1.68809e-11	1.66702e-11	1.57602e-11
12.7	1.76111e-11	1.74417e-11	1.72247e-11	1.68831e-11	1.68811e-11	1.66767e-11	1.57432e-11
12.72	1.76151e-11	1.74393e-11	1.72236e-11	1.68836e-11	1.68846e-11	1.66726e-11	1.57394e-11
12.74	1.76166e-11	1.74441e-11	1.72196e-11	1.68832e-11	1.68851e-11	1.66652e-11	1.57348e-11
12.76	1.76196e-11	1.74385e-11	1.72243e-11	1.68897e-11	1.68834e-11	1.66648e-11	1.57501e-11
12.78	1.76173e-11	1.74392e-11	1.72262e-11	1.68878e-11	1.68747e-11	1.66665e-11	1.57474e-11
12.8	1.76114e-11	1.74376e-11	1.72213e-11	1.68792e-11	1.68819e-11	1.66657e-11	1.57403e-11
12.82	1.76082e-11	1.74407e-11	1.72198e-11	1.68814e-11	1.68732e-11	1.66739e-11	1.5745e-11
12.84	1.76037e-11	1.74443e-11	1.72181e-11	1.68816e-11	1.68799e-11	1.66728e-11	1.57501e-11
12.86	1.7616e-11	1.74386e-11	1.72212e-11	1.68821e-11	1.68769e-11	1.6673e-11	1.57441e-11
12.88	1.76135e-11	1.74449e-11	1.72191e-11	1.68846e-11	1.68871e-11	1.66704e-11	1.57498e-11
12.9	1.76108e-11	1.74391e-11	1.72232e-11	1.68789e-11	1.68726e-11	1.66696e-11	1.57472e-11
12.92	1.7615e-11	1.74463e-11	1.72237e-11	1.68886e-11	1.68826e-11	1.66682e-11	1.57356e-11
12.94	1.76118e-11	1.74457e-11	1.72194e-11	1.68882e-11	1.68833e-11	1.66705e-11	1.57423e-11
12.96	1.76121e-11	1.74406e-11	1.72287e-11	1.68823e-11	1.68777e-11	1.66729e-11	1.57236e-11
12.98	1.7608e-11	1.74406e-11	1.72186e-11	1.68844e-11	1.68845e-11	1.66739e-11	1.57375e-11
13	1.76113e-11	1.74407e-11	1.72184e-11	1.68844e-11	1.68823e-11	1.66668e-11	1.57382e-11
13.02	1.76113e-11	1.74463e-11	1.72219e-11	1.68869e-11	1.6889e-11	1.66754e-11	1.57344e-11
13.04	1.7613e-11	1.7438e-11	1.72154e-11	1.68865e-11	1.68932e-11	1.66647e-11	1.57349e-11
13.06	1.7608e-11	1.74408e-11	1.72185e-11	1.68815e-11	1.68846e-11	1.66653e-11	1.57369e-11
13.08	1.76179e-11	1.74433e-11	1.72192e-11	1.68908e-11	1.68838e-11	1.66681e-11	1.57472e-11
13.1	1.7616e-11	1.74378e-11	1.72134e-11	1.68825e-11	1.68907e-11	1.6666e-11	1.57366e-11
13.12	1.76116e-11	1.7446e-11	1.72183e-11	1.68951e-11	1.68869e-11	1.66735e-11	1.57659e-11
13.14	1.76123e-11	1.74409e-11	1.72186e-11	1.68803e-11	1.68849e-11	1.66717e-11	1.57461e-11
13.16	1.76156e-11	1.74427e-11	1.72102e-11	1.6889e-11	1.68835e-11	1.66758e-11	1.57416e-11
13.18	1.7616e-11	1.74468e-11	1.72301e-11	1.6884e-11	1.68878e-11	1.66698e-11	1.5744e-11
13.2	1.76183e-11	1.74446e-11	1.72237e-11	1.68837e-11	1.68904e-11	1.66651e-11	1.57464e-11
13.22	1.76211e-11	1.74428e-11	1.72203e-11	1.68836e-11	1.6884e-11	1.66691e-11	1.57519e-11
13.24	1.7616e-11	1.74462e-11	1.72202e-11	1.68887e-11	1.68828e-11	1.6658e-11	1.57531e-11
13.26	1.76175e-11	1.74436e-11	1.72169e-11	1.68828e-11	1.68847e-11	1.66633e-11	1.57462e-11
13.28	1.76141e-11	1.7446e-11	1.72259e-11	1.68851e-11	1.6889e-11	1.66621e-11	1.57554e-11
13.3	1.7616e-11	1.74478e-11	1.72217e-11	1.68867e-11	1.68853e-11	1.66653e-11	1.57461e-11
13.32	1.76168e-11	1.74435e-11	1.72145e-11	1.68898e-11	1.68895e-11	1.66706e-11	1.57498e-11
13.34	1.76094e-11	1.74389e-11	1.72199e-11	1.68864e-11	1.68902e-11	1.66631e-11	1.57293e-11
13.36	1.76142e-11	1.74425e-11	1.72218e-11	1.6888e-11	1.68835e-11	1.66661e-11	1.57353e-11
13.38	1.76146e-11	1.74386e-11	1.72205e-11	1.68891e-11	1.68856e-11	1.66688e-11	1.5732e-11
13.4	1.76139e-11	1.74414e-11	1.72146e-11	1.68871e-11	1.68952e-11	1.66604e-11	1.57301e-11
13.42	1.76125e-11	1.74423e-11	1.72191e-11	1.68849e-11	1.68877e-11	1.66644e-11	1.57293e-11
13.44	1.76175e-11	1.74458e-11	1.72245e-11	1.68846e-11	1.6887e-11	1.66636e-11	1.57399e-11
13.46	1.76189e-11	1.74403e-11	1.72246e-11	1.68886e-11	1.68856e-11	1.66699e-11	1.574e-11
13.48	1.76175e-11	1.7447e-11	1.72143e-11	1.6887e-11	1.68823e-11	1.66657e-11	1.57376e-11
13.5	1.76174e-11	1.74499e-11	1.72212e-11	1.688e-11	1.68875e-11	1.66706e-11	1.57404e-11
13.52	1.76157e-11	1.74434e-11	1.72148e-11	1.68934e-11	1.68795e-11	1.66696e-11	1.57518e-11
13.54	1.76194e-11	1.7447e-11	1.72172e-11	1.68857e-11	1.68878e-11	1.6667e-11	1.57385e-11
13.56	1.76186e-11	1.74409e-11	1.72302e-11	1.68813e-11	1.68851e-11	1.66592e-11	1.57394e-11
13.58	1.76178e-11	1.74457e-11	1.72225e-11	1.68895e-11	1.68878e-11	1.66672e-11	1.57531e-11
13.6	1.76137e-11	1.74387e-11	1.72201e-11	1.68856e-11	1.68871e-11	1.66682e-11	1.57546e-11
13.62	1.76158e-11	1.74418e-11	1.7223e-11	1.68823e-11	1.68876e-11	1.66703e-11	1.57471e-11
13.64	1.7612e-11	1.74447e-11	1.72202e-11	1.68889e-11	1.68806e-11	1.66715e-11	1.57526e-11
13.66	1.76161e-11	1.74413e-11	1.72199e-11	1.68883e-11	1.68882e-11	1.66684e-11	1.57403e-11
13.68	1.76194e-11	1.7443e-11	1.72138e-11	1.68891e-11	1.68857e-11	1.66577e-11	1.57504e-11
13.7	1.76134e-11	1.74473e-11	1.72165e-11	1.68899e-11	1.68945e-11	1.66614e-11	1.57405e-11
13.72	1.7619e-11	1.74454e-11	1.7222e-11	1.6889e-11	1.68914e-11	1.6668e-11	1.57493e-11
13.74	1.76163e-11	1.74457e-11	1.72171e-11	1.68883e-11	1.68938e-11	1.66625e-11	1.57517e-11
13.76	1.76156e-11	1.74528e-11	1.72207e-11	1.68925e-11	1.68895e-11	1.66663e-11	1.57431e-11
13.78	1.76115e-11	1.74509e-11	1.72216e-11	1.68869e-11	1.6892e-11	1.66657e-11	1.57507e-11
13.8	1.76136e-11	1.74458e-11	1.72178e-11	1.6892e-11	1.68898e-11	1.66637e-11	1.57375e-11
13.82	1.76144e-11	1.74511e-11	1.72221e-11	1.68901e-11	1.68845e-11	1.66651e-11	1.5745e-11
13.84	1.76164e-11	1.74503e-11	1.72179e-11	1.68826e-11	1.68911e-11	1.66595e-11	1.57437e-11
13.86	1.76193e-11	1.74521e-11	1.72222e-11	1.68917e-11	1.6884e-11	1.66643e-11	1.57444e-11
13.88	1.76204e-11	1.74489e-11	1.72163e-11	1.68862e-11	1.68835e-11	1.66729e-11	1.5749e-11
13.9	1.76201e-11	1.74468e-11	1.72199e-11	1.68934e-11	1.68876e-11	1.66705e-11	1.57446e-11
13.92	1.76231e-11	1.7444e-11	1.7219e-11	1.68895e-11	1.68926e-11	1.66688e-11	1.57488e-11
13.94	1.76216e-11	1.74434e-11	1.72187e-11	1.68829e-11	1.68879e-11	1.66654e-11	1.57277e-11
13.96	1.76165e-11	1.74462e-11	1.7218e-11	1.6896e-11	1.68858e-11	1.66585e-11	1.57222e-11
13.98	1.76186e-11	1.7444e-11	1.72209e-11	1.68845e-11	1.68977e-11	1.66695e-11	1.57273e-11
14	1.7617e-11	1.74502e-11	1.72085e-11	1.68965e-11	1.68937e-11	1.66639e-11	1.57241e-11
14.02	1.76171e-11	1.74404e-11	1.72215e-11	1.68866e-11	1.68885e-11	1.66656e-11	1.57441e-11
14.04	1.76183e-11	1.74438e-11	1.72177e-11	1.68944e-11	1.68838e-11	1.66673e-11	1.57295e-11
14.06	1.762e-11	1.74466e-11	1.72221e-11	1.68957e-11	1.68816e-11	1.66611e-11	1.57242e-11
14.08	1.76229e-11	1.74492e-11	1.7221e-11	1.68878e-11	1.68786e-11	1.66616e-11	1.57436e-11
14.1	1.76194e-11	1.74475e-11	1.72195e-11	1.69e-11	1.68826e-11	1.6668e-11	1.57224e-11
14.12	1.76224e-11	1.74445e-11	1.72235e-11	1.68976e-11	1.68848e-11	1.66759e-11	1.57196e-11
14.14	1.76172e-11	1.7445e-11	1.72194e-11	1.68928e-11	1.68848e-11	1.66652e-11	1.57364e-11
14.16	1.76179e-11	1.7449e-11	1.7217e-11	1.6887e-11	1.68875e-11	1.66673e-11	1.57305e-11
14.18	1.7617e-11	1.74403e-11	1.72132e-11	1.68905e-11	1.68719e-11	1.66739e-11	1.57195e-11
14.2	1.76183e-11	1.74394e-11	1.72175e-11	1.689e-11	1.68784e-11	1.66711e-11	1.57162e-11
14.22	1.76218e-11	1.74428e-11	1.72209e-11	1.68959e-11	1.6878e-11	1.66619e-11	1.57354e-11
14.24	1.76161e-11	1.74429e-11	1.72102e-11	1.68903e-11	1.68768e-11	1.6665e-11	1.57326e-11
14.26	1.76186e-11	1.74431e-11	1.72154e-11	1.69002e-11	1.68765e-11	1.66657e-11	1.57309e-11
14.28	1.76252e-11	1.74434e-11	1.72169e-11	1.6899e-11	1.68787e-11	1.66661e-11	1.57202e-11
14.3	1.76223e-11	1.74463e-11	1.72181e-11	1.68919e-11	1.68676e-11	1.66693e-11	1.57402e-11
14.32	1.7622e-11	1.74432e-11	1.72174e-11	1.68959e-11	1.68792e-11	1.667e-11	1.5724e-11
14.34	1.76219e-11	1.74488e-11	1.72136e-11	1.689e-11	1.68791e-11	1.66712e-11	1.57193e-11
14.36	1.76282e-11	1.74427e-11	1.72157e-11	1.68911e-11	1.68789e-11	1.66669e-11	1.57201e-11
14.38	1.76229e-11	1.74409e-11	1.72129e-11	1.68937e-11	1.68715e-11	1.66661e-11	1.57107e-11
14.4	1.76212e-11	1.7439e-11	1.72112e-11	1.68956e-11	1.68761e-11	1.66736e-11	1.57189e-11
14.42	1.76181e-11	1.74459e-11	1.72105e-11	1.68944e-11	1.68755e-11	1.66728e-11	1.57236e-11
14.44	1.76261e-11	1.7444e-11	1.72053e-11	1.68925e-11	1.6877e-11	1.66613e-11	1.57114e-11
14.46	1.76213e-11	1.74471e-11	1.7207e-11	1.6882e-11	1.6881e-11	1.66704e-11	1.57262e-11
14.48	1.76223e-11	1.74516e-11	1.72053e-11	1.68901e-11	1.68807e-11	1.66718e-11	1.57029e-11
14.5	1.76148e-11	1.74417e-11	1.72084e-11	1.689e-11	1.68692e-11	1.66653e-11	1.57248e-11
14.52	1.76203e-11	1.74446e-11	1.72128e-11	1.68842e-11	1.68765e-11	1.66717e-11	1.57252e-11
14.54	1.76208e-11	1.74416e-11	1.72114e-11	1.68889e-11	1.68816e-11	1.66646e-11	1.57107e-11
14.56	1.76218e-11	1.74395e-11	1.72115e-11	1.68867e-11	1.68802e-11	1.66664e-11	1.57124e-11
14.58	1.76217e-11	1.74439e-11	1.72113e-11	1.68867e-11	1.68676e-11	1.66715e-11	1.57161e-11
14.6	1.76169e-11	1.74494e-11	1.72063e-11	1.68888e-11	1.68728e-11	1.66662e-11	1.57129e-11
14.62	1.76161e-11	1.74402e-11	1.72117e-11	1.68926e-11	1.68767e-11	1.66702e-11	1.57205e-11
14.64	1.76193e-11	1.74441e-11	1.72064e-11	1.68809e-11	1.68816e-11	1.66671e-11	1.5712e-11
14.66	1.76287e-11	1.74468e-11	1.7208e-11	1.68878e-11	1.6871e-11	1.66735e-11	1.57089e-11
14.68	1.76221e-11	1.74412e-11	1.7204e-11	1.68887e-11	1.68746e-11	1.66653e-11	1.5722e-11
14.7	1.76215e-11	1.74452e-11	1.72068e-11	1.68914e-11	1.68723e-11	1.66655e-11	1.57192e-11
14.72	1.76242e-11	1.7444e-11	1.72105e-11	1.68862e-11	1.68742e-11	1.66667e-11	1.57201e-11
14.74	1.76202e-11	1.74502e-11	1.72091e-11	1.68908e-11	1.68792e-11	1.66746e-11	1.57307e-11
14.76	1.76221e-11	1.74488e-11	1.72111e-11	1.68872e-11	1.68722e-11	1.66677e-11	1.57009e-11
14.78	1.76243e-11	1.74405e-11	1.72097e-11	1.68907e-11	1.68773e-11	1.66695e-11	1.57279e-11
14.8	1.76217e-11	1.74418e-11	1.72104e-11	1.68918e-11	1.68784e-11	1.66707e-11	1.5698e-11
14.82	1.76239e-11	1.74433e-11	1.72141e-11	1.68909e-11	1.68794e-11	1.66719e-11	1.57062e-11
14.84	1.7626e-11	1.74478e-11	1.72149e-11	1.68935e-11	1.68772e-11	1.66668e-11	1.57186e-11
14.86	1.76207e-11	1.74515e-11	1.72158e-11	1.68955e-11	1.68836e-11	1.6667e-11	1.57103e-11
14.88	1.76206e-11	1.74453e-11	1.72177e-11	1.68932e-11	1.68759e-11	1.6667e-11	1.57145e-11
14.9	1.76199e-11	1.74414e-11	1.72208e-11	1.68986e-11	1.68792e-11	1.66728e-11	1.57169e-11
14.92	1.76229e-11	1.74418e-11	1.72141e-11	1.68933e-11	1.68704e-11	1.66735e-11	1.57149e-11
14.94	1.76171e-11	1.74448e-11	1.72145e-11	1.68893e-11	1.68788e-11	1.66691e-11	1.572e-11
14.96	1.762e-11	1.7439e-11	1.72179e-11	1.68946e-11	1.68743e-11	1.66703e-11	1.57124e-11
14.98	1.76194e-11	1.74509e-11	1.72175e-11	1.6896e-11	1.68778e-11	1.66612e-11	1.57163e-11
15	1.76259e-11	1.74499e-11	1.72135e-11	1.69015e-11	1.68804e-11	1.66644e-11	1.57208e-11
15.02	1.76201e-11	1.74486e-11	1.72153e-11	1.68974e-11	1.68754e-11	1.66671e-11	1.57107e-11
15.04	1.76188e-11	1.74423e-11	1.72108e-11	1.68932e-11	1.68747e-11	1.66659e-11	1.5739e-11
15.06	1.76241e-11	1.74464e-11	1.72148e-11	1.68952e-11	1.68773e-11	1.66619e-11	1.57099e-11
15.08	1.76215e-11	1.74452e-11	1.72146e-11	1.68913e-11	1.68826e-11	1.66794e-11	1.57113e-11
15.1	1.76182e-11	1.74441e-11	1.72158e-11	1.68957e-11	1.68794e-11	1.66641e-11	1.57159e-11
15.12	1.76244e-11	1.74444e-11	1.72136e-11	1.68921e-11	1.68709e-11	1.66624e-11	1.57221e-11
15.14	1.76248e-11	1.7446e-11	1.72115e-11	1.68905e-11	1.68805e-11	1.66601e-11	1.57388e-11
15.16	1.76178e-11	1.74469e-11	1.72086e-11	1.68948e-11	1.68834e-11	1.66711e-11	1.57423e-11
15.18	1.76223e-11	1.74448e-11	1.722e-11	1.68971e-11	1.68803e-11	1.66692e-11	1.5765e-11
15.2	1.76186e-11	1.74438e-11	1.72151e-11	1.69016e-11	1.68796e-11	1.6668e-11	1.57559e-11
15.22	1.76193e-11	1.74484e-11	1.72106e-11	1.69019e-11	1.68777e-11	1.66672e-11	1.57761e-11
15.24	1.76253e-11	1.74472e-11	1.72187e-11	1.68896e-11	1.68693e-11	1.66757e-11	1.57804e-11
15.26	1.76221e-11	1.74463e-11	1.72082e-11	1.69015e-11	1.68865e-11	1.66772e-11	1.57878e-11
15.28	1.76232e-11	1.74447e-11	1.72099e-11	1.68985e-11	1.68811e-11	1.66709e-11	1.57875e-11
15.3	1.76201e-11	1.74488e-11	1.72095e-11	1.68981e-11	1.68766e-11	1.66734e-11	1.58028e-11
15.32	1.76219e-11	1.74507e-11	1.72109e-11	1.68935e-11	1.68752e-11	1.66724e-11	1.58041e-11
15.34	1.76211e-11	1.7444e-11	1.72139e-11	1.69022e-11	1.68712e-11	1.6674e-11	1.58178e-11
15.36	1.76288e-11	1.74495e-11	1.72184e-11	1.68968e-11	1.68696e-11	1.66731e-11	1.58149e-11
15.38	1.76195e-11	1.74433e-11	1.72132e-11	1.6898e-11	1.68789e-11	1.66648e-11	1.5816e-11
15.4	1.76208e-11	1.74457e-11	1.72154e-11	1.68941e-11	1.68758e-11	1.66734e-11	1.5822e-11
15.42	1.76287e-11	1.74427e-11	1.72187e-11	1.6898e-11	1.68793e-11	1.66694e-11	1.58269e-11
15.44	1.76234e-11	1.74442e-11	1.72147e-11	1.69009e-11	1.68801e-11	1.66737e-11	1.58267e-11
15.46	1.76255e-11	1.74444e-11	1.72167e-11	1.68966e-11	1.68748e-11	1.66727e-11	1.58309e-11
15.48	1.7624e-11	1.74473e-11	1.72142e-11	1.68935e-11	1.68748e-11	1.66728e-11	1.58274e-11
15.5	1.76219e-11	1.74492e-11	1.72179e-11	1.68924e-11	1.68737e-11	1.66793e-11	1.58248e-11
15.52	1.76226e-11	1.74467e-11	1.72114e-11	1.69005e-11	1.6872e-11	1.66687e-11	1.58244e-11
15.54	1.76224e-11	1.74443e-11	1.72063e-11	1.6887e-11	1.68832e-11	1.66751e-11	1.58212e-11
15.56	1.76238e-11	1.7446e-11	1.72088e-11	1.69016e-11	1.6879e-11	1.66753e-11	1.58152e-11
15.58	1.76155e-11	1.74449e-11	1.72095e-11	1.6902e-11	1.68775e-11	1.66714e-11	1.58348e-11
15.6	1.76191e-11	1.74476e-11	1.72116e-11	1.69036e-11	1.68748e-11	1.66719e-11	1.58406e-11
15.62	1.76277e-11	1.74524e-11	1.72139e-11	1.69021e-11	1.68745e-11	1.66744e-11	1.58332e-11
15.64	1.76273e-11	1.74495e-11	1.72197e-11	1.68996e-11	1.68717e-11	1.66735e-11	1.58314e-11
15.66	1.76245e-11	1.74495e-11	1.72085e-11	1.69025e-11	1.68757e-11	1.66641e-11	1.5838e-11
15.68	1.76283e-11	1.74546e-11	1.72071e-11	1.69095e-11	1.68788e-11	1.66665e-11	1.58503e-11
15.7	1.76285e-11	1.7443e-11	1.72097e-11	1.69087e-11	1.68733e-11	1.66638e-11	1.58356e-11
15.72	1.76289e-11	1.74478e-11	1.72085e-11	1.69039e-11	1.6881e-11	1.66593e-11	1.5834e-11
15.74	1.76292e-11	1.7441e-11	1.72113e-11	1.69032e-11	1.68795e-11	1.66673e-11	1.58347e-11
15.76	1.76292e-11	1.74454e-11	1.72105e-11	1.69019e-11	1.6875e-11	1.66687e-11	1.58533e-11
15.78	1.76214e-11	1.74462e-11	1.72088e-11	1.69015e-11	1.68757e-11	1.66633e-11	1.58656e-11
15.8	1.76245e-11	1.74536e-11	1.72112e-11	1.69072e-11	1.6874e-11	1.66621e-11	1.58568e-11
15.82	1.76262e-11	1.74448e-11	1.72111e-11	1.69041e-11	1.68809e-11	1.66596e-11	1.58345e-11
15.84	1.76246e-11	1.74463e-11	1.72094e-11	1.69011e-11	1.68748e-11	1.66701e-11	1.58392e-11
15.86	1.76286e-11	1.74454e-11	1.72113e-11	1.69162e-11	1.68682e-11	1.66621e-11	1.58249e-11
15.88	1.76237e-11	1.74458e-11	1.72127e-11	1.69041e-11	1.68734e-11	1.66581e-11	1.58457e-11
15.9	1.76243e-11	1.74465e-11	1.72146e-11	1.69035e-11	1.68735e-11	1.66566e-11	1.58377e-11
15.92	1.76271e-11	1.74481e-11	1.72158e-11	1.69049e-11	1.68741e-11	1.66588e-11	1.58285e-11
15.94	1.76277e-11	1.74429e-11	1.72156e-11	1.6912e-11	1.68728e-11	1.6675e-11	1.5828e-11
15.96	1.76295e-11	1.74496e-11	1.72148e-11	1.69078e-11	1.68726e-11	1.6674e-11	1.58281e-11
15.98	1.76273e-11	1.74504e-11	1.72109e-11	1.6909e-11	1.68689e-11	1.66663e-11	1.58305e-11
16	1.76261e-11	1.7446e-11	1.72018e-11	1.69041e-11	1.6874e-11	1.66686e-11	1.58334e-11
16.02	1.76276e-11	1.74521e-11	1.72152e-11	1.6907e-11	1.68675e-11	1.66769e-11	1.58339e-11
16.04	1.76289e-11	1.74534e-11	1.72106e-11	1.69057e-11	1.68713e-11	1.66907e-11	1.58285e-11
16.06	1.76272e-11	1.74489e-11	1.72085e-11	1.69093e-11	1.68684e-11	1.67019e-11	1.58529e-11
16.08	1.76238e-11	1.74467e-11	1.72136e-11	1.69054e-11	1.68787e-11	1.67222e-11	1.58306e-11
16.1	1.76245e-11	1.74509e-11	1.72105e-11	1.68964e-11	1.68747e-11	1.67295e-11	1.58345e-11
16.12	1.76205e-11	1.74449e-11	1.72128e-11	1.68984e-11	1.68744e-11	1.67453e-11	1.58376e-11
16.14	1.76246e-11	1.7445e-11	1.72129e-11	1.69007e-11	1.68738e-11	1.67607e-11	1.58563e-11
16.16	1.76306e-11	1.74464e-11	1.72109e-11	1.69109e-11	1.68703e-11	1.67639e-11	1.58474e-11
16.18	1.76377e-11	1.745e-11	1.72165e-11	1.68924e-11	1.68742e-11	1.67732e-11	1.5852e-11
16.2	1.76302e-11	1.7435e-11	1.72625e-11	1.69025e-11	1.688e-11	1.67668e-11	1.58544e-11
16.22	1.76336e-11	1.74449e-11	1.7324e-11	1.69005e-11	1.68813e-11	1.67765e-11	1.58485e-11
16.24	1.76312e-11	1.74449e-11	1.73645e-11	1.68951e-11	1.68711e-11	1.67861e-11	1.58435e-11
16.26	1.76259e-11	1.74473e-11	1.73779e-11	1.68984e-11	1.68825e-11	1.67832e-11	1.58568e-11
16.28	1.76302e-11	1.74464e-11	1.73897e-11	1.69015e-11	1.68782e-11	1.67872e-11	1.58551e-11
16.3	1.76307e-11	1.74435e-11	1.73822e-11	1.69012e-11	1.68901e-11	1.67906e-11	1.58401e-11
16.32	1.76304e-11	1.74514e-11	1.73838e-11	1.69018e-11	1.68786e-11	1.68015e-11	1.58374e-11
16.34	1.76294e-11	1.74446e-11	1.73904e-11	1.69053e-11	1.68826e-11	1.68001e-11	1.58428e-11
16.36	1.76246e-11	1.74419e-11	1.73921e-11	1.69042e-11	1.68756e-11	1.67917e-11	1.58328e-11
16.38	1.76295e-11	1.74458e-11	1.74028e-11	1.69173e-11	1.68749e-11	1.68039e-11	1.58361e-11
16.4	1.76277e-11	1.74389e-11	1.74169e-11	1.69112e-11	1.68737e-11	1.68013e-11	1.58409e-11
16.42	1.76261e-11	1.74378e-11	1.74195e-11	1.69051e-11	1.68776e-11	1.68005e-11	1.58361e-11
16.44	1.76232e-11	1.74376e-11	1.74194e-11	1.69152e-11	1.68724e-11	1.68003e-11	1.58486e-11
16.46	1.76248e-11	1.74345e-11	1.74163e-11	1.69192e-11	1.68753e-11	1.68018e-11	1.58337e-11
16.48	1.76268e-11	1.74316e-11	1.7423e-11	1.69218e-11	1.68747e-11	1.67955e-11	1.5846e-11
16.5	1.76229e-11	1.7426e-11	1.74291e-11	1.69269e-11	1.68805e-11	1.67966e-11	1.58396e-11
16.52	1.75711e-11	1.74288e-11	1.74301e-11	1.69308e-11	1.68738e-11	1.68e-11	1.58406e-11
16.54	1.76275e-11	1.74275e-11	1.74344e-11	1.69516e-11	1.68787e-11	1.68039e-11	1.58523e-11
16.56	1.76287e-11	1.74277e-11	1.74399e-11	1.69616e-11	1.68769e-11	1.67969e-11	1.5839e-11
16.58	1.76272e-11	1.74305e-11	1.74488e-11	1.69576e-11	1.68879e-11	1.67977e-11	1.58514e-11
16.6	1.76315e-11	1.74317e-11	1.7446e-11	1.69523e-11	1.68914e-11	1.68059e-11	1.58467e-11
16.62	1.76265e-11	1.74319e-11	1.74504e-11	1.69612e-11	1.68979e-11	1.67901e-11	1.58406e-11
16.64	1.76252e-11	1.74372e-11	1.74633e-11	1.69775e-11	1.69058e-11	1.68001e-11	1.58484e-11
16.66	1.76303e-11	1.74331e-11	1.74578e-11	1.69826e-11	1.69116e-11	1.68015e-11	1.58446e-11
16.68	1.7619e-11	1.74382e-11	1.74655e-11	1.69856e-11	1.6929e-11	1.67954e-11	1.58448e-11
16.7	1.76216e-11	1.74446e-11	1.74637e-11	1.69914e-11	1.69387e-11	1.68083e-11	1.5831e-11
16.72	1.76229e-11	1.7452e-11	1.74757e-11	1.70046e-11	1.69461e-11	1.68024e-11	1.58351e-11
16.74	1.76143e-11	1.74546e-11	1.74723e-11	1.70142e-11	1.69435e-11	1.68036e-11	1.58516e-11
16.76	1.76095e-11	1.74569e-11	1.74725e-11	1.70274e-11	1.69562e-11	1.68091e-11	1.58405e-11
16.78	1.76139e-11	1.7463e-11	1.74774e-11	1.7028e-11	1.69636e-11	1.68007e-11	1.58313e-11
16.8	1.76146e-11	1.74704e-11	1.74761e-11	1.703e-11	1.69734e-11	1.68112e-11	1.5847e-11
16.82	1.76161e-11	1.74707e-11	1.74831e-11	1.70387e-11	1.69808e-11	1.68077e-11	1.58397e-11
16.84	1.76123e-11	1.7471e-11	1.74822e-11	1.70498e-11	1.69835e-11	1.67976e-11	1.58557e-11
16.86	1.76102e-11	1.74788e-11	1.74835e-11	1.70575e-11	1.6988e-11	1.67951e-11	1.5835e-11
16.88	1.76077e-11	1.74782e-11	1.74892e-11	1.70511e-11	1.70014e-11	1.68e-11	1.58381e-11
16.9	1.7604e-11	1.74813e-11	1.74885e-11	1.70668e-11	1.69943e-11	1.67967e-11	1.58382e-11
16.92	1.76026e-11	1.74827e-11	1.74886e-11	1.70721e-11	1.70004e-11	1.67997e-11	1.58353e-11
16.94	1.76054e-11	1.74853e-11	1.74892e-11	1.70719e-11	1.70084e-11	1.67943e-11	1.58498e-11
16.96	1.76044e-11	1.74865e-11	1.74934e-11	1.70702e-11	1.702e-11	1.67916e-11	1.58473e-11
16.98	1.76033e-11	1.74901e-11	1.74963e-11	1.70766e-11	1.70223e-11	1.67939e-11	1.58458e-11
17	1.75989e-11	1.74917e-11	1.74922e-11	1.70836e-11	1.7017e-11	1.67971e-11	1.58455e-11
17.02	1.75976e-11	1.74898e-11	1.74949e-11	1.70781e-11	1.70263e-11	1.67974e-11	1.58323e-11
17.04	1.7595e-11	1.74966e-11	1.7491e-11	1.70875e-11	1.70271e-11	1.67932e-11	1.58448e-11
17.06	1.7592e-11	1.74897e-11	1.74959e-11	1.70858e-11	1.70283e-11	1.67842e-11	1.58428e-11
17.08	1.75955e-11	1.74904e-11	1.74974e-11	1.70894e-11	1.70218e-11	1.67907e-11	1.5849e-11
17.1	1.75944e-11	1.74935e-11	1.74976e-11	1.70968e-11	1.70243e-11	1.6792e-11	1.58431e-11
17.12	1.75881e-11	1.74891e-11	1.75002e-11	1.70928e-11	1.70276e-11	1.67827e-11	1.58467e-11
17.14	1.75837e-11	1.74867e-11	1.74969e-11	1.70971e-11	1.70257e-11	1.68027e-11	1.58346e-11
17.16	1.75876e-11	1.74818e-11	1.75013e-11	1.70911e-11	1.70293e-11	1.679e-11	1.58406e-11
17.18	1.75857e-11	1.74909e-11	1.74985e-11	1.70941e-11	1.70319e-11	1.67956e-11	1.58474e-11
17.2	1.75842e-11	1.74894e-11	1.74958e-11	1.70946e-11	1.70364e-11	1.67922e-11	1.58203e-11
17.22	1.75838e-11	1.74858e-11	1.74941e-11	1.70926e-11	1.70299e-11	1.67951e-11	1.58432e-11
17.24	1.75832e-11	1.74898e-11	1.75074e-11	1.70918e-11	1.70311e-11	1.67932e-11	1.58329e-11
17.26	1.75784e-11	1.74808e-11	1.75031e-11	1.70999e-11	1.70258e-11	1.6803e-11	1.5843e-11
17.28	1.75795e-11	1.74868e-11	1.74956e-11	1.70869e-11	1.70324e-11	1.6797e-11	1.58343e-11
17.3	1.75833e-11	1.74857e-11	1.75045e-11	1.70899e-11	1.70328e-11	1.67969e-11	1.58515e-11
17.32	1.75803e-11	1.74843e-11	1.74964e-11	1.71003e-11	1.70319e-11	1.67933e-11	1.5847e-11
17.34	1.75796e-11	1.74844e-11	1.75026e-11	1.70907e-11	1.70313e-11	1.67979e-11	1.58271e-11
17.36	1.75795e-11	1.74894e-11	1.75046e-11	1.70917e-11	1.70261e-11	1.67995e-11	1.58345e-11
17.38	1.75838e-11	1.748e-11	1.75032e-11	1.70972e-11	1.70234e-11	1.67976e-11	1.58314e-11
17.4	1.75762e-11	1.74877e-11	1.75114e-11	1.70868e-11	1.70298e-11	1.67917e-11	1.58541e-11
17.42	1.75859e-11	1.74856e-11	1.75022e-11	1.70976e-11	1.70237e-11	1.6799e-11	1.58355e-11
17.44	1.75965e-11	1.74831e-11	1.75031e-11	1.70911e-11	1.70257e-11	1.67966e-11	1.58241e-11
17.46	1.75793e-11	1.74834e-11	1.75025e-11	1.70908e-11	1.70319e-11	1.67994e-11	1.58361e-11
17.48	1.75864e-11	1.74787e-11	1.75092e-11	1.70884e-11	1.7026e-11	1.67939e-11	1.58293e-11
17.5	1.75822e-11	1.74839e-11	1.75063e-11	1.70919e-11	1.70193e-11	1.68029e-11	1.58436e-11
17.52	1.75973e-11	1.74811e-11	1.7516e-11	1.70908e-11	1.70228e-11	1.67953e-11	1.58366e-11
17.54	1.75898e-11	1.74838e-11	1.75092e-11	1.70871e-11	1.70206e-11	1.68008e-11	1.58459e-11
17.56	1.75845e-11	1.74817e-11	1.75139e-11	1.70873e-11	1.70224e-11	1.67888e-11	1.58271e-11
17.58	1.75851e-11	1.74841e-11	1.751e-11	1.70921e-11	1.70145e-11	1.67976e-11	1.58237e-11
17.6	1.7592e-11	1.74876e-11	1.75092e-11	1.70908e-11	1.70159e-11	1.68017e-11	1.58155e-11
17.62	1.75884e-11	1.74799e-11	1.75151e-11	1.70862e-11	1.70224e-11	1.67994e-11	1.58105e-11
17.64	1.75897e-11	1.74824e-11	1.75089e-11	1.70847e-11	1.70176e-11	1.68032e-11	1.5831e-11
17.66	1.75934e-11	1.7488e-11	1.75206e-11	1.70912e-11	1.70212e-11	1.68061e-11	1.58203e-11
17.68	1.75913e-11	1.74831e-11	1.75127e-11	1.70877e-11	1.70217e-11	1.68031e-11	1.58456e-11
17.7	1.7589e-11	1.74871e-11	1.75136e-11	1.70877e-11	1.70183e-11	1.68026e-11	1.58463e-11
17.72	1.75972e-11	1.74798e-11	1.75152e-11	1.70858e-11	1.7021e-11	1.68057e-11	1.586e-11
17.74	1.75922e-11	1.74805e-11	1.75162e-11	1.70993e-11	1.70241e-11	1.67949e-11	1.58588e-11
17.76	1.76e-11	1.74817e-11	1.75208e-11	1.70853e-11	1.7023e-11	1.6803e-11	1.58616e-11
17.78	1.7594e-11	1.74789e-11	1.75151e-11	1.70939e-11	1.70276e-11	1.68038e-11	1.58591e-11
17.8	1.7597e-11	1.74847e-11	1.75194e-11	1.70877e-11	1.70185e-11	1.68014e-11	1.58498e-11
17.82	1.75982e-11	1.74802e-11	1.7514e-11	1.70805e-11	1.70206e-11	1.67962e-11	1.58483e-11
17.84	1.75967e-11	1.74743e-11	1.75159e-11	1.70888e-11	1.7022e-11	1.68003e-11	1.58451e-11
17.86	1.76046e-11	1.74786e-11	1.75226e-11	1.70778e-11	1.70196e-11	1.67979e-11	1.58557e-11
17.88	1.76007e-11	1.7481e-11	1.75232e-11	1.70909e-11	1.70176e-11	1.68021e-11	1.58632e-11
17.9	1.76028e-11	1.74751e-11	1.75194e-11	1.7082e-11	1.7014e-11	1.67947e-11	1.58648e-11
17.92	1.76005e-11	1.74747e-11	1.75208e-11	1.70871e-11	1.70134e-11	1.68035e-11	1.58586e-11
17.94	1.76e-11	1.74778e-11	1.75179e-11	1.70849e-11	1.7019e-11	1.68081e-11	1.5859e-11
17.96	1.75983e-11	1.7481e-11	1.75244e-11	1.70786e-11	1.70133e-11	1.68076e-11	1.58723e-11
17.98	1.76e-11	1.74825e-11	1.75166e-11	1.70755e-11	1.702e-11	1.68005e-11	1.58719e-11
18	1.76041e-11	1.74776e-11	1.75205e-11	1.70836e-11	1.70141e-11	1.6804e-11	1.58587e-11
18.02	1.76001e-11	1.74838e-11	1.75216e-11	1.70817e-11	1.70128e-11	1.68091e-11	1.58561e-11
18.04	1.75919e-11	1.74825e-11	1.75215e-11	1.70791e-11	1.70111e-11	1.68062e-11	1.5868e-11
18.06	1.75984e-11	1.74814e-11	1.75221e-11	1.70787e-11	1.70151e-11	1.68036e-11	1.58575e-11
18.08	1.76003e-11	1.74847e-11	1.75221e-11	1.70778e-11	1.70143e-11	1.68011e-11	1.58802e-11
18.1	1.75977e-11	1.7486e-11	1.75216e-11	1.70828e-11	1.70225e-11	1.68054e-11	1.5873e-11
18.12	1.75995e-11	1.74858e-11	1.75246e-11	1.70712e-11	1.70155e-11	1.68065e-11	1.58641e-11
18.14	1.75877e-11	1.74878e-11	1.75227e-11	1.70727e-11	1.70106e-11	1.68036e-11	1.58651e-11
18.16	1.75955e-11	1.74876e-11	1.75263e-11	1.7072e-11	1.70124e-11	1.68062e-11	1.58635e-11
18.18	1.7598e-11	1.74875e-11	1.75265e-11	1.70723e-11	1.7012e-11	1.68089e-11	1.58576e-11
18.2	1.75956e-11	1.74957e-11	1.75269e-11	1.70786e-11	1.70175e-11	1.68091e-11	1.58523e-11
18.22	1.7593e-11	1.74844e-11	1.75318e-11	1.70774e-11	1.70148e-11	1.6805e-11	1.58467e-11
18.24	1.75952e-11	1.74896e-11	1.75369e-11	1.7074e-11	1.70175e-11	1.68079e-11	1.58522e-11
18.26	1.75937e-11	1.74939e-11	1.75389e-11	1.70707e-11	1.70142e-11	1.68029e-11	1.5854e-11
18.28	1.75901e-11	1.74847e-11	1.75362e-11	1.70669e-11	1.7003e-11	1.6807e-11	1.58661e-11
18.3	1.75935e-11	1.749e-11	1.75304e-11	1.70716e-11	1.70076e-11	1.68018e-11	1.58619e-11
18.32	1.75926e-11	1.7491e-11	1.75354e-11	1.707e-11	1.70057e-11	1.68029e-11	1.58684e-11
18.34	1.75949e-11	1.74912e-11	1.75465e-11	1.70731e-11	1.70104e-11	1.68058e-11	1.58638e-11
18.36	1.75956e-11	1.7492e-11	1.75341e-11	1.70618e-11	1.70088e-11	1.68022e-11	1.58723e-11
18.38	1.75944e-11	1.74953e-11	1.75308e-11	1.70744e-11	1.70071e-11	1.68018e-11	1.58658e-11
18.4	1.75903e-11	1.74874e-11	1.75376e-11	1.70675e-11	1.70064e-11	1.68087e-11	1.5861e-11
18.42	1.75866e-11	1.74951e-11	1.75381e-11	1.70587e-11	1.70067e-11	1.67988e-11	1.58685e-11
18.44	1.75847e-11	1.74978e-11	1.7529e-11	1.70717e-11	1.70073e-11	1.68019e-11	1.58691e-11
18.46	1.75852e-11	1.74882e-11	1.7535e-11	1.70684e-11	1.7008e-11	1.68021e-11	1.58562e-11
18.48	1.75892e-11	1.7494e-11	1.75398e-11	1.70681e-11	1.70131e-11	1.68074e-11	1.58494e-11
18.5	1.75922e-11	1.7495e-11	1.75381e-11	1.70653e-11	1.70183e-11	1.68054e-11	1.58475e-11
18.52	1.75942e-11	1.74974e-11	1.75407e-11	1.70744e-11	1.70106e-11	1.68042e-11	1.58633e-11
18.54	1.75844e-11	1.74947e-11	1.75432e-11	1.70613e-11	1.70091e-11	1.68049e-11	1.58617e-11
18.56	1.758e-11	1.75006e-11	1.75341e-11	1.70571e-11	1.70092e-11	1.6812e-11	1.58486e-11
18.58	1.7583e-11	1.74998e-11	1.75355e-11	1.70689e-11	1.70124e-11	1.68148e-11	1.58525e-11
18.6	1.75854e-11	1.75018e-11	1.75336e-11	1.70653e-11	1.70067e-11	1.6801e-11	1.58515e-11
18.62	1.75836e-11	1.75018e-11	1.75343e-11	1.70606e-11	1.70049e-11	1.68037e-11	1.58497e-11
18.64	1.75828e-11	1.75046e-11	1.75364e-11	1.70652e-11	1.70107e-11	1.68032e-11	1.58583e-11
18.66	1.7588e-11	1.75023e-11	1.75398e-11	1.70569e-11	1.7004e-11	1.68099e-11	1.58691e-11
18.68	1.75916e-11	1.75008e-11	1.75437e-11	1.70631e-11	1.70057e-11	1.68081e-11	1.58504e-11
18.7	1.75868e-11	1.7507e-11	1.75397e-11	1.70642e-11	1.70067e-11	1.68115e-11	1.58545e-11
18.72	1.75827e-11	1.75019e-11	1.75445e-11	1.70635e-11	1.69974e-11	1.68056e-11	1.58536e-11
18.74	1.75884e-11	1.7501e-11	1.75384e-11	1.70623e-11	1.70027e-11	1.68179e-11	1.58495e-11
18.76	1.7584e-11	1.7504e-11	1.75468e-11	1.70638e-11	1.70045e-11	1.68069e-11	1.58563e-11
18.78	1.75885e-11	1.75022e-11	1.75492e-11	1.70684e-11	1.7006e-11	1.68149e-11	1.5858e-11
18.8	1.7582e-11	1.75018e-11	1.75446e-11	1.70751e-11	1.70086e-11	1.68007e-11	1.58687e-11
18.82	1.75812e-11	1.75058e-11	1.75436e-11	1.70656e-11	1.70062e-11	1.6804e-11	1.58532e-11
18.84	1.75803e-11	1.75092e-11	1.75501e-11	1.70648e-11	1.70016e-11	1.68002e-11	1.5872e-11
18.86	1.75804e-11	1.7514e-11	1.75459e-11	1.70689e-11	1.70025e-11	1.68055e-11	1.58541e-11
18.88	1.75816e-11	1.75139e-11	1.75482e-11	1.70663e-11	1.70014e-11	1.6808e-11	1.58622e-11
18.9	1.75829e-11	1.75106e-11	1.75496e-11	1.70614e-11	1.7002e-11	1.6807e-11	1.5856e-11
18.92	1.75794e-11	1.75067e-11	1.75534e-11	1.70701e-11	1.70027e-11	1.68108e-11	1.58588e-11
18.94	1.75848e-11	1.75109e-11	1.75493e-11	1.70682e-11	1.70055e-11	1.68024e-11	1.58451e-11
18.96	1.75821e-11	1.75182e-11	1.75485e-11	1.70699e-11	1.70074e-11	1.68146e-11	1.58451e-11
18.98	1.75838e-11	1.75089e-11	1.75502e-11	1.70691e-11	1.70032e-11	1.68123e-11	1.586e-11
19	1.75845e-11	1.75177e-11	1.7555e-11	1.70713e-11	1.70007e-11	1.68257e-11	1.58613e-11
19.02	1.75806e-11	1.75153e-11	1.75486e-11	1.70669e-11	1.70018e-11	1.68175e-11	1.58462e-11
19.04	1.75846e-11	1.75154e-11	1.75499e-11	1.70691e-11	1.70094e-11		1.58573e-11
19.06	1.75848e-11	1.75172e-11	1.75519e-11	1.70682e-11	1.70053e-11		1.58547e-11
19.08	1.75795e-11	1.75207e-11	1.75537e-11	1.70644e-11	1.70014e-11		1.58536e-11
19.1	1.75936e-11	1.75171e-11	1.75497e-11	1.70653e-11	1.69945e-11		1.58663e-11
19.12	1.75896e-11	1.75223e-11	1.75488e-11	1.70618e-11	1.70014e-11		1.58621e-11
19.14	1.75893e-11	1.75178e-11	1.75522e-11	1.70679e-11	1.70042e-11		1.5861e-11
19.16	1.75858e-11	1.75179e-11	1.75532e-11	1.7059e-11	1.70053e-11		1.58545e-11
19.18	1.7586e-11	1.75184e-11	1.75498e-11	1.7055e-11	1.69968e-11		1.58655e-11
19.2	1.75853e-11	1.75235e-11	1.7557e-11	1.70638e-11	1.70036e-11		1.58553e-11
19.22	1.75855e-11	1.75138e-11	1.75535e-11	1.70584e-11	1.70038e-11		1.58586e-11
19.24	1.75807e-11	1.75237e-11	1.75562e-11	1.70665e-11	1.69996e-11		1.5859e-11
19.26	1.75943e-11	1.75207e-11	1.75536e-11	1.70606e-11	1.70043e-11		1.58432e-11
19.28	1.75947e-11	1.75278e-11	1.7554e-11	1.70714e-11	1.6996e-11		1.58441e-11
19.3	1.75902e-11	1.75226e-11	1.75536e-11	1.70741e-11	1.70036e-11		1.58392e-11
19.32	1.75932e-11	1.7523e-11	1.75565e-11	1.70696e-11	1.70001e-11		1.58575e-11
19.34	1.75905e-11	1.75256e-11	1.75568e-11	1.70652e-11	1.69987e-11		1.58461e-11
19.36	1.75949e-11	1.75249e-11	1.75577e-11	1.70652e-11	1.69917e-11		1.58606e-11
19.38	1.7588e-11	1.7519e-11	1.75562e-11	1.70753e-11	1.6998e-11		1.58509e-11
19.4	1.76e-11	1.75239e-11	1.7551e-11	1.70756e-11	1.69993e-11		1.58416e-11
19.42	1.75935e-11	1.75212e-11	1.75607e-11	1.70687e-11	1.70037e-11		1.58465e-11
19.44	1.75961e-11	1.75262e-11	1.75571e-11	1.70684e-11	1.6997e-11		1.58594e-11
19.46	1.75981e-11	1.75252e-11	1.75543e-11	1.70743e-11	1.70008e-11		1.58423e-11
19.48	1.75947e-11	1.75301e-11	1.75521e-11	1.70731e-11	1.69956e-11		1.58541e-11
19.5	1.75979e-11	1.75243e-11	1.75502e-11	1.70728e-11	1.69962e-11		1.58468e-11
19.52	1.75996e-11	1.75259e-11	1.75532e-11	1.70726e-11	1.69989e-11		1.58584e-11
19.54	1.75938e-11	1.75328e-11	1.75568e-11	1.70687e-11	1.6997e-11		1.58538e-11
19.56	1.75989e-11	1.75331e-11	1.75586e-11	1.70723e-11	1.69862e-11		1.58576e-11
19.58	1.75986e-11	1.7535e-11	1.75552e-11	1.7073e-11	1.69887e-11		1.58562e-11
19.6	1.76079e-11	1.75357e-11	1.75554e-11	1.70694e-11	1.6982e-11		1.58462e-11
19.62	1.7604e-11	1.75395e-11	1.75578e-11	1.70638e-11	1.69847e-11		1.58567e-11
19.64	1.76059e-11	1.75318e-11	1.75534e-11	1.70678e-11	1.6987e-11		1.58523e-11
19.66	1.76083e-11	1.75365e-11	1.75538e-11	1.70726e-11	1.69834e-11		1.58523e-11
19.68	1.76074e-11	1.75328e-11	1.75551e-11	1.70759e-11	1.69897e-11		1.58673e-11
19.7	1.76051e-11	1.75371e-11	1.75592e-11	1.70716e-11	1.69855e-11		1.58596e-11
19.72	1.7605e-11	1.75348e-11	1.75538e-11	1.70771e-11	1.6977e-11		1.58694e-11
19.74	1.76026e-11	1.75337e-11	1.75581e-11	1.70733e-11	1.69842e-11		1.58546e-11
19.76	1.76029e-11	1.75361e-11	1.75574e-11	1.70772e-11	1.69851e-11		1.58552e-11
19.78	1.76046e-11	1.75362e-11	1.75583e-11	1.70753e-11	1.69784e-11		1.58618e-11
19.8	1.76079e-11	1.75377e-11	1.7557e-11	1.70687e-11	1.69887e-11		1.5865e-11
19.82	1.76119e-11	1.75408e-11	1.75628e-11	1.70762e-11	1.69929e-11		1.58683e-11
19.84	1.76166e-11	1.75398e-11	1.75609e-11	1.7072e-11	1.6994e-11		1.58601e-11
19.86	1.76109e-11	1.75422e-11	1.75579e-11	1.70814e-11	1.69871e-11		1.5869e-11
19.88	1.76095e-11	1.75449e-11	1.75644e-11	1.70812e-11	1.69928e-11		1.58507e-11
19.9	1.76132e-11	1.75407e-11	1.75594e-11	1.70688e-11	1.69923e-11		1.58622e-11
19.92	1.76136e-11	1.75459e-11	1.75633e-11	1.70646e-11	1.69894e-11		1.587e-11
19.94	1.76153e-11	1.7544e-11	1.75661e-11	1.70759e-11	1.69945e-11		1.58595e-11
19.96	1.76151e-11	1.75425e-11	1.75595e-11	1.70781e-11	1.69876e-11		1.58756e-11
19.98	1.7619e-11	1.7546e-11	1.75614e-11	1.70726e-11	1.69905e-11		1.58704e-11
20	1.7625e-11	1.75489e-11	1.75573e-11	1.70709e-11	1.69973e-11		1.58589e-11
20.02	1.76165e-11	1.75481e-11	1.75628e-11	1.70759e-11	1.69953e-11		1.586e-11
20.04	1.76233e-11	1.7553e-11	1.75612e-11	1.70729e-11	1.69929e-11		1.58679e-11
20.06	1.76255e-11	1.75514e-11	1.75544e-11	1.70715e-11	1.69953e-11		1.58798e-11
20.08	1.76253e-11	1.7556e-11	1.75523e-11	1.70745e-11	1.69954e-11		1.58564e-11
20.1	1.76284e-11	1.75531e-11	1.75564e-11	1.70689e-11	1.69931e-11		1.58534e-11
20.12	1.76227e-11	1.75508e-11	1.75605e-11	1.707e-11	1.69935e-11		1.58627e-11
20.14	1.76333e-11	1.75512e-11	1.75644e-11	1.70735e-11	1.6999e-11		1.58715e-11
20.16	1.76387e-11	1.75511e-11	1.75558e-11	1.7074e-11	1.69989e-11		1.58693e-11
20.18	1.76359e-11	1.75522e-11	1.75585e-11	1.70729e-11	1.69853e-11		1.58627e-11
20.2	1.76342e-11	1.75558e-11	1.7559e-11	1.70771e-11	1.69957e-11		1.58748e-11
20.22	1.76353e-11	1.75496e-11	1.75576e-11	1.70782e-11	1.6991e-11		1.58772e-11
20.24	1.76457e-11	1.7555e-11	1.75569e-11	1.70715e-11	1.69997e-11		1.58763e-11
20.26	1.76393e-11	1.75543e-11	1.75609e-11	1.70765e-11	1.69975e-11		1.58721e-11
20.28	1.76399e-11	1.75553e-11	1.75588e-11	1.70737e-11	1.70029e-11		1.58588e-11
20.3	1.7641e-11	1.756e-11	1.75562e-11	1.70753e-11	1.6998e-11		1.58706e-11
20.32	1.76439e-11	1.75593e-11	1.75549e-11	1.70754e-11	1.69957e-11		1.58701e-11
20.34	1.76433e-11	1.75555e-11	1.75554e-11	1.70839e-11	1.69964e-11		1.58703e-11
20.36	1.76417e-11	1.75557e-11	1.7558e-11	1.70835e-11	1.69984e-11		1.5883e-11
20.38	1.76477e-11	1.75585e-11	1.7557e-11	1.70801e-11	1.69887e-11		1.58722e-11
20.4	1.76437e-11	1.75647e-11	1.75616e-11	1.70712e-11	1.70033e-11		1.58777e-11
20.42	1.76526e-11	1.75648e-11	1.75551e-11	1.70769e-11	1.7e-11		1.58723e-11
20.44	1.76558e-11	1.75626e-11	1.75628e-11	1.70774e-11	1.69887e-11		1.58624e-11
20.46	1.76579e-11	1.75566e-11	1.75574e-11	1.70792e-11	1.6998e-11		1.5857e-11
20.48	1.76614e-11	1.75624e-11	1.75584e-11	1.70861e-11	1.69901e-11		1.58677e-11
20.5	1.76621e-11	1.75598e-11	1.75564e-11	1.70795e-11	1.69955e-11		1.58802e-11
20.52	1.76613e-11	1.75615e-11	1.75576e-11	1.70837e-11	1.69962e-11		1.58782e-11
20.54	1.76584e-11	1.75666e-11	1.75568e-11	1.70788e-11	1.69934e-11		1.58757e-11
20.56	1.76612e-11	1.75646e-11	1.75579e-11	1.70797e-11	1.69925e-11		1.58768e-11
20.58	1.76677e-11	1.75694e-11	1.75547e-11	1.70788e-11	1.69987e-11		1.58732e-11
20.6	1.7667e-11	1.75695e-11	1.75581e-11	1.70764e-11	1.7002e-11		1.58916e-11
20.62	1.76698e-11	1.75703e-11	1.75601e-11	1.70787e-11	1.69962e-11		1.58821e-11
20.64	1.7671e-11	1.75692e-11	1.75594e-11	1.70749e-11	1.69999e-11		1.58653e-11
20.66	1.76728e-11	1.75666e-11	1.75624e-11	1.70764e-11	1.69924e-11		1.5887e-11
20.68	1.76737e-11	1.7563e-11	1.75571e-11	1.70846e-11	1.70024e-11		1.58751e-11
20.7	1.7678e-11	1.7571e-11	1.75628e-11	1.7081e-11	1.70058e-11		1.58752e-11
20.72	1.76767e-11	1.75697e-11	1.75577e-11	1.70819e-11	1.6994e-11		1.58681e-11
20.74	1.7682e-11	1.75619e-11	1.75609e-11	1.70731e-11	1.6999e-11		1.58677e-11
20.76	1.76797e-11	1.75705e-11	1.75591e-11	1.70821e-11	1.69974e-11		1.58844e-11
20.78	1.76857e-11	1.75649e-11	1.75628e-11	1.70758e-11	1.69958e-11		1.5855e-11
20.8	1.76857e-11	1.75646e-11	1.75605e-11	1.70797e-11	1.69945e-11		1.58647e-11
20.82	1.76831e-11	1.75719e-11	1.75572e-11	1.70877e-11	1.69971e-11		1.58693e-11
20.84	1.76881e-11	1.75703e-11	1.75672e-11	1.70818e-11	1.69997e-11		1.58796e-11
20.86	1.76892e-11	1.75693e-11	1.75645e-11	1.70854e-11	1.69987e-11		1.5892e-11
20.88	1.7693e-11	1.75744e-11	1.75619e-11	1.70822e-11	1.70007e-11		1.58723e-11
20.9	1.76949e-11	1.75667e-11	1.75588e-11	1.70858e-11	1.69931e-11		1.58707e-11
20.92	1.7701e-11	1.75697e-11	1.75645e-11	1.70843e-11	1.70014e-11		1.58698e-11
20.94	1.76967e-11	1.75786e-11	1.75615e-11	1.70813e-11	1.69935e-11		1.5869e-11
20.96	1.77021e-11	1.75778e-11	1.75637e-11	1.70865e-11	1.69999e-11		1.58702e-11
20.98	1.77039e-11	1.75707e-11	1.75705e-11	1.70832e-11	1.69969e-11		1.58743e-11
21	1.76985e-11	1.75761e-11	1.75617e-11	1.70816e-11	1.70057e-11		1.58746e-11
21.02	1.77054e-11	1.75729e-11	1.75666e-11	1.70857e-11	1.69961e-11		1.58674e-11
21.04	1.77053e-11	1.7581e-11	1.75601e-11	1.70817e-11	1.69997e-11
21.06	1.77054e-11	1.75764e-11	1.75576e-11	1.70836e-11	1.70033e-11
21.08	1.77129e-11	1.75666e-11	1.75627e-11	1.70831e-11	1.70002e-11
21.1	1.77172e-11	1.75815e-11	1.75646e-11	1.709e-11	1.69966e-11
21.12	1.77105e-11	1.75704e-11	1.75553e-11	1.70838e-11	1.69912e-11
21.14	1.77086e-11	1.75771e-11	1.75609e-11	1.70909e-11	1.70009e-11
21.16	1.7715e-11	1.75787e-11	1.75638e-11	1.70869e-11	1.69979e-11
21.18	1.77173e-11	1.75787e-11	1.75632e-11	1.70827e-11	1.69922e-11
21.2	1.7718e-11	1.75783e-11	1.75684e-11	1.70812e-11	1.69891e-11
21.22	1.77196e-11	1.75801e-11	1.75687e-11	1.70844e-11	1.69951e-11
21.24	1.77192e-11	1.75742e-11	1.7562e-11	1.7086e-11	1.69936e-11
21.26	1.77232e-11	1.75801e-11	1.75675e-11	1.70842e-11	1.70054e-11
21.28	1.77224e-11	1.75819e-11	1.7572e-11	1.70868e-11	1.70012e-11
21.3	1.77257e-11	1.75783e-11	1.75652e-11	1.70771e-11	1.69957e-11
21.32	1.77261e-11	1.7574e-11	1.75642e-11	1.70835e-11	1.6998e-11
21.34	1.77244e-11	1.75756e-11	1.75671e-11	1.70836e-11	1.69989e-11
21.36	1.77274e-11	1.75819e-11	1.75639e-11	1.7085e-11	1.70016e-11
21.38	1.77344e-11	1.75781e-11	1.75649e-11	1.7085e-11	1.69897e-11
21.4	1.77312e-11	1.75893e-11	1.7567e-11	1.70851e-11	1.7002e-11
21.42	1.77314e-11	1.75765e-11	1.75717e-11	1.70867e-11	1.69952e-11
21.44	1.77318e-11	1.75825e-11	1.75713e-11	1.70807e-11	1.69903e-11
21.46	1.77336e-11	1.7578e-11	1.75685e-11	1.7088e-11	1.70014e-11
21.48	1.77354e-11	1.75801e-11	1.75707e-11	1.70915e-11	1.70008e-11
21.5	1.77386e-11	1.75815e-11	1.75665e-11	1.70856e-11	1.70037e-11
21.52	1.77412e-11	1.75771e-11	1.757e-11	1.70837e-11	1.69962e-11
21.54	1.77349e-11	1.75801e-11	1.75704e-11	1.70736e-11	1.69993e-11
21.56	1.77366e-11	1.75829e-11	1.75669e-11	1.70877e-11	1.69983e-11
21.58	1.7742e-11	1.75824e-11	1.75653e-11	1.70703e-11	1.69953e-11
21.6	1.77363e-11	1.75833e-11	1.75655e-11	1.70753e-11	1.69948e-11
21.62	1.77406e-11	1.75823e-11	1.75674e-11	1.7087e-11	1.70008e-11
21.64	1.77427e-11	1.75888e-11	1.75661e-11	1.70873e-11	1.69858e-11
21.66	1.77427e-11	1.75878e-11	1.75652e-11	1.7088e-11	1.69968e-11
21.68	1.77503e-11	1.75864e-11	1.75641e-11	1.70786e-11	1.69905e-11
21.7	1.77531e-11	1.75871e-11	1.75681e-11	1.70795e-11	1.69927e-11
21.72	1.77481e-11	1.75868e-11	1.7572e-11	1.70902e-11	1.69877e-11
21.74	1.77476e-11	1.75848e-11	1.75669e-11	1.70818e-11	1.70028e-11
21.76	1.7751e-11	1.75925e-11	1.75669e-11	1.70829e-11	1.69935e-11
21.78	1.77555e-11	1.75902e-11	1.7566e-11	1.7081e-11	1.69841e-11
21.8	1.77542e-11	1.75916e-11	1.75685e-11	1.70801e-11	1.69997e-11
21.82	1.77545e-11	1.75853e-11	1.75695e-11	1.70893e-11	1.69977e-11
21.84	1.77641e-11	1.75846e-11	1.75727e-11	1.70854e-11	1.69974e-11
21.86	1.776e-11	1.759e-11	1.75696e-11	1.7085e-11	1.7005e-11
21.88	1.77589e-11	1.75857e-11	1.75705e-11	1.70915e-11	1.69985e-11
21.9	1.77581e-11	1.75964e-11	1.7569e-11	1.70874e-11	1.69884e-11
21.92	1.77559e-11	1.75873e-11	1.75679e-11	1.70847e-11	1.69899e-11
21.94	1.77608e-11	1.75929e-11	1.75736e-11	1.70884e-11	1.69941e-11
21.96	1.77657e-11	1.75886e-11	1.75684e-11	1.70859e-11	1.69897e-11
21.98	1.77652e-11	1.7592e-11	1.75678e-11	1.70844e-11	1.69903e-11
22	1.77671e-11	1.75956e-11	1.75745e-11	1.70817e-11	1.69994e-11
22.02	1.7773e-11	1.75977e-11	1.75719e-11	1.70898e-11	1.70059e-11
22.04	1.77674e-11	1.75905e-11	1.75719e-11	1.70855e-11	1.69964e-11
22.06	1.77683e-11	1.75996e-11	1.75693e-11	1.70822e-11	1.69994e-11
22.08	1.77692e-11	1.75926e-11	1.75677e-11	1.70895e-11	1.69911e-11
22.1	1.77706e-11	1.75923e-11	1.75716e-11	1.70908e-11	1.69929e-11
22.12	1.77674e-11	1.75968e-11	1.75769e-11	1.70829e-11	1.69982e-11
22.14	1.77685e-11	1.7595e-11	1.75742e-11	1.7081e-11	1.70007e-11
22.16	1.77736e-11	1.7597e-11	1.75765e-11	1.70859e-11	1.69995e-11
22.18	1.77738e-11	1.75928e-11	1.75682e-11	1.70868e-11	1.69965e-11
22.2	1.77771e-11	1.75971e-11	1.75696e-11	1.70937e-11	1.69988e-11
22.22	1.77832e-11	1.7593e-11	1.7577e-11	1.70908e-11	1.70045e-11
22.24	1.77719e-11	1.75963e-11	1.75721e-11	1.70831e-11	1.70007e-11
22.26	1.77777e-11	1.75979e-11	1.75784e-11	1.70957e-11	1.69996e-11
22.28	1.77821e-11	1.75987e-11	1.75806e-11	1.70838e-11	1.70002e-11
22.3	1.77826e-11	1.75972e-11	1.75729e-11	1.70879e-11	1.7011e-11
22.32	1.7784e-11	1.7597e-11	1.75755e-11	1.70853e-11	1.70052e-11
22.34	1.77825e-11	1.7604e-11	1.75772e-11	1.70881e-11	1.70042e-11
22.36	1.77823e-11	1.75964e-11	1.75792e-11	1.7086e-11	1.70041e-11
22.38	1.77856e-11	1.75974e-11	1.7581e-11	1.70859e-11	1.70027e-11
22.4	1.77854e-11	1.75949e-11	1.75758e-11	1.70876e-11	1.69997e-11
22.42	1.7786e-11	1.7601e-11	1.7579e-11	1.70879e-11	1.69974e-11
22.44	1.77816e-11	1.76023e-11	1.75716e-11	1.70979e-11	1.70103e-11
22.46	1.77898e-11	1.76017e-11	1.75723e-11	1.70886e-11	1.70022e-11
22.48	1.77901e-11	1.75942e-11	1.75718e-11	1.70876e-11	1.7e-11
22.5	1.77982e-11	1.76051e-11	1.7579e-11	1.70825e-11	1.70114e-11
22.52	1.77923e-11	1.75989e-11	1.75771e-11	1.70872e-11	1.69914e-11
22.54	1.77954e-11	1.75995e-11	1.75703e-11	1.70946e-11	1.70016e-11
22.56	1.7796e-11	1.76059e-11	1.75784e-11	1.70875e-11	1.70091e-11
22.58	1.77975e-11	1.76059e-11	1.75781e-11	1.70881e-11	1.70016e-11
22.6	1.7798e-11	1.7597e-11	1.75773e-11	1.70927e-11	1.7007e-11
22.62	1.78041e-11	1.76037e-11	1.75774e-11	1.70891e-11	1.69997e-11
22.64	1.7802e-11	1.76041e-11	1.7575e-11	1.70819e-11	1.7008e-11
22.66	1.77977e-11	1.75999e-11	1.75769e-11	1.7083e-11	1.70035e-11
22.68	1.78035e-11	1.76053e-11	1.75756e-11	1.70799e-11	1.70062e-11
22.7	1.78035e-11	1.76025e-11	1.75759e-11	1.70952e-11	1.70087e-11
22.72	1.78079e-11	1.76047e-11	1.75794e-11	1.70868e-11	1.69959e-11
22.74	1.78117e-11	1.75965e-11	1.75806e-11	1.70845e-11	1.70032e-11
22.76	1.78054e-11	1.76076e-11	1.75742e-11	1.70871e-11	1.70059e-11
22.78	1.78046e-11	1.76016e-11	1.7578e-11	1.70853e-11	1.70104e-11
22.8	1.78049e-11	1.7608e-11	1.75744e-11	1.70824e-11	1.70114e-11
22.82	1.78115e-11	1.76039e-11	1.75733e-11	1.70864e-11	1.70045e-11
22.84	1.78073e-11	1.76082e-11	1.758e-11	1.70873e-11	1.7012e-11
22.86	1.78046e-11	1.76029e-11	1.75757e-11	1.70912e-11	1.70014e-11
22.88	1.78102e-11	1.7613e-11	1.75797e-11	1.70784e-11	1.70075e-11
22.9	1.78133e-11	1.76034e-11	1.75781e-11	1.70877e-11	1.69998e-11
22.92	1.78124e-11	1.76077e-11	1.758e-11	1.70855e-11	1.70082e-11
22.94	1.78151e-11	1.76092e-11	1.75744e-11	1.70794e-11	1.70184e-11
22.96	1.78037e-11	1.76112e-11	1.7581e-11	1.70811e-11	1.70137e-11
22.98	1.78105e-11	1.7606e-11	1.75796e-11	1.70854e-11	1.70099e-11
23	1.78115e-11	1.76046e-11	1.75793e-11	1.70852e-11	1.70132e-11
23.02	1.78133e-11	1.76082e-11	1.75774e-11	1.70852e-11	1.70032e-11
23.04	1.78095e-11	1.76063e-11	1.75717e-11	1.70888e-11	1.70122e-11
23.06	1.7815e-11	1.76118e-11	1.7577e-11	1.70919e-11	1.70074e-11
23.08	1.78183e-11	1.76023e-11	1.75821e-11	1.70883e-11	1.70066e-11
23.1	1.78194e-11	1.76074e-11	1.75751e-11	1.70921e-11	1.70076e-11
23.12	1.78184e-11	1.76105e-11	1.75753e-11	1.70808e-11	1.70026e-11
23.14	1.7819e-11	1.76088e-11	1.75787e-11	1.7087e-11	1.70061e-11
23.16	1.78197e-11	1.76045e-11	1.75793e-11	1.70876e-11	1.70004e-11
23.18	1.7818e-11	1.76062e-11	1.75803e-11	1.70839e-11	1.69982e-11
23.2	1.78176e-11	1.76066e-11	1.75787e-11	1.70823e-11	1.70047e-11
23.22	1.78226e-11	1.76079e-11	1.75833e-11	1.70796e-11	1.70059e-11
23.24	1.78238e-11	1.76156e-11	1.75763e-11	1.70867e-11	1.69944e-11
23.26	1.78207e-11	1.76104e-11	1.75756e-11	1.70896e-11	1.70034e-11
23.28	1.78278e-11	1.76011e-11	1.7576e-11	1.708e-11	1.6994e-11
23.3	1.78281e-11	1.76089e-11	1.75789e-11	1.70864e-11	1.70051e-11
23.32	1.78219e-11	1.76081e-11	1.75774e-11	1.70887e-11	1.6997e-11
23.34	1.78189e-11	1.76042e-11	1.75776e-11	1.70848e-11	1.70029e-11
23.36	1.78282e-11	1.76045e-11	1.75788e-11	1.7084e-11	1.69941e-11
23.38	1.78253e-11	1.76104e-11	1.75783e-11	1.70853e-11	1.69981e-11
23.4	1.783e-11	1.76098e-11	1.75795e-11	1.70892e-11	1.69969e-11
23.42	1.78264e-11	1.76122e-11	1.75742e-11	1.70859e-11	1.69978e-11
23.44	1.78321e-11	1.76084e-11	1.75766e-11	1.70898e-11	1.69967e-11
23.46	1.78272e-11	1.76095e-11	1.7583e-11	1.70856e-11	1.70014e-11
23.48	1.78289e-11	1.76032e-11	1.75816e-11	1.70863e-11	1.70032e-11
23.5	1.78313e-11	1.76103e-11	1.75821e-11	1.70841e-11	1.69979e-11
23.52	1.78251e-11	1.76027e-11	1.75779e-11	1.70864e-11	1.69984e-11
23.54	1.78329e-11	1.76098e-11	1.75736e-11	1.70879e-11	1.69935e-11
23.56	1.78292e-11	1.76078e-11	1.75763e-11	1.709e-11	1.70047e-11
23.58	1.78365e-11	1.76189e-11	1.75773e-11	1.70875e-11	1.70005e-11
23.6	1.78315e-11	1.76146e-11	1.75847e-11	1.70929e-11	1.70018e-11
23.62	1.78327e-11	1.76114e-11	1.75763e-11	1.70898e-11	1.6996e-11
23.64	1.78269e-11	1.76143e-11	1.7582e-11	1.70923e-11	1.70005e-11
23.66	1.78316e-11	1.76184e-11	1.75782e-11	1.70934e-11	1.70001e-11
23.68	1.783e-11	1.76189e-11	1.75798e-11	1.70867e-11	1.69947e-11
23.7	1.7834e-11	1.76162e-11	1.75788e-11	1.70865e-11	1.70083e-11
23.72	1.78325e-11	1.76132e-11	1.75837e-11	1.70891e-11	1.70016e-11
23.74	1.78352e-11	1.76119e-11	1.75874e-11		1.6998e-11
23.76	1.78349e-11	1.76094e-11	1.75863e-11		1.69971e-11
23.78	1.78309e-11	1.76182e-11	1.75831e-11		1.70086e-11
23.8	1.78394e-11	1.76192e-11	1.75885e-11		1.70051e-11
23.82	1.78419e-11	1.76161e-11	1.75857e-11		1.70027e-11
23.84	1.78405e-11	1.76136e-11	1.75792e-11		1.7002e-11
23.86	1.78343e-11	1.76177e-11	1.75871e-11		1.70069e-11
23.88	1.78422e-11	1.76266e-11	1.7584e-11		1.70044e-11
23.9	1.78394e-11	1.76214e-11	1.75755e-11		1.70006e-11
23.92	1.78384e-11	1.76225e-11	1.75801e-11		1.69962e-11
23.94	1.78397e-11	1.76201e-11	1.75829e-11		1.70027e-11
23.96	1.78382e-11	1.76237e-11	1.75814e-11		1.70053e-11
23.98	1.78448e-11	1.76199e-11	1.75893e-11		1.70037e-11
24	1.78425e-11	1.76258e-11	1.75871e-11		1.7004e-11
24.02	1.78359e-11	1.76268e-11	1.75842e-11		1.70011e-11
24.04	1.78396e-11	1.76266e-11	1.75845e-11
24.06	1.78444e-11	1.76225e-11	1.75794e-11
24.08	1.78366e-11	1.76259e-11	1.75871e-11
24.1	1.78392e-11	1.76206e-11	1.75781e-11
24.12	1.78376e-11	1.76184e-11	1.75815e-11
24.14	1.78459e-11	1.76257e-11	1.7579e-11
24.16	1.78411e-11	1.76285e-11	1.75806e-11
24.18	1.78515e-11	1.76303e-11	1.75813e-11
24.2	1.78462e-11	1.76289e-11	1.75846e-11
24.22	1.78506e-11	1.76245e-11	1.75788e-11
24.24	1.78469e-11	1.76265e-11	1.75816e-11
24.26	1.78539e-11	1.76235e-11	1.75782e-11
24.28	1.78516e-11	1.76245e-11	1.75859e-11
24.3	1.78513e-11	1.76252e-11	1.75784e-11
24.32	1.7852e-11	1.76264e-11	1.75813e-11
24.34	1.78477e-11	1.76287e-11	1.75844e-11
24.36	1.78532e-11	1.76269e-11	1.75884e-11
24.38	1.78496e-11	1.76359e-11	1.75806e-11
24.4	1.78579e-11	1.76231e-11	1.75857e-11
24.42	1.78474e-11	1.76297e-11	1.75772e-11
24.44	1.78496e-11	1.76282e-11
24.46	1.78526e-11	1.76292e-11
24.48	1.78511e-11	1.76364e-11
24.5	1.78546e-11	1.76328e-11
24.52	1.78582e-11	1.7633e-11
24.54	1.78522e-11	1.76255e-11
24.56	1.78586e-11	1.76343e-11
24.58	1.786e-11	1.76312e-11
24.6	1.78601e-11	1.76259e-11
24.62	1.78607e-11	1.76286e-11
24.64	1.78609e-11	1.76279e-11
24.66	1.78588e-11	1.7628e-11
24.68	1.78644e-11	1.76306e-11
24.7	1.78605e-11	1.76284e-11
24.72	1.78574e-11	1.76247e-11
24.74	1.78583e-11	1.76241e-11
24.76	1.78666e-11	1.76288e-11
24.78	1.78675e-11	1.76293e-11
24.8	1.78604e-11	1.76255e-11
24.82	1.78629e-11	1.76224e-11
24.84	1.78631e-11	1.76253e-11
24.86	1.78621e-11	1.76322e-11
24.88	1.78666e-11	1.76303e-11
24.9	1.78618e-11	1.76249e-11
24.92	1.78611e-11	1.76261e-11
24.94	1.78682e-11	1.76188e-11
24.96	1.78645e-11	1.76294e-11
24.98	1.78626e-11	1.76247e-11
25	1.78646e-11	1.76346e-11
25.02	1.78649e-11	1.76382e-11
25.04	1.78636e-11	1.76413e-11
25.06	1.78695e-11	1.76286e-11
25.08	1.78636e-11	1.76303e-11
25.1	1.78675e-11	1.76221e-11
25.12	1.78687e-11	1.76359e-11
25.14	1.78617e-11	1.7625e-11
25.16	1.78658e-11	1.76318e-11
25.18	1.78617e-11	1.76375e-11
25.2	1.78663e-11	1.76358e-11
25.22	1.78644e-11	1.76357e-11
25.24	1.78651e-11	1.76351e-11
25.26	1.78663e-11	1.76346e-11
25.28	1.78635e-11	1.7636e-11
25.3	1.78594e-11	1.76424e-11
25.32	1.78622e-11	1.764e-11
25.34	1.78669e-11	1.76337e-11
25.36	1.78683e-11	1.76299e-11
25.38	1.78708e-11	1.76372e-11
25.4	1.78682e-11	1.76426e-11
25.42	1.78658e-11	1.76383e-11
25.44	1.7865e-11	1.76406e-11
25.46	1.78706e-11	1.76393e-11
25.48	1.78725e-11	1.76401e-11
25.5	1.78707e-11	1.76419e-11
25.52	1.78713e-11	1.76334e-11
25.54	1.78718e-11	1.76366e-11
25.56	1.78667e-11	1.76355e-11
25.58	1.78742e-11	1.76385e-11
25.6	1.78755e-11	1.76388e-11
25.62	1.78751e-11	1.7634e-11
25.64	1.7873e-11	1.7635e-11
25.66	1.78715e-11	1.76358e-11
25.68	1.7876e-11	1.76459e-11
25.7	1.78756e-11	1.76403e-11
25.72	1.78713e-11	1.76381e-11
25.74	1.78728e-11	1.76374e-11
25.76	1.78766e-11	1.76322e-11
25.78	1.78737e-11	1.76394e-11
25.8	1.78747e-11	1.76375e-11
25.82	1.78727e-11	1.76429e-11
25.84	1.78727e-11	1.76332e-11
25.86	1.78764e-11	1.76394e-11
25.88	1.78767e-11	1.76389e-11
25.9	1.78738e-11	1.76342e-11
25.92	1.78757e-11	1.7643e-11
25.94	1.78754e-11	1.76399e-11
25.96	1.78727e-11	1.76367e-11
25.98	1.78764e-11	1.76351e-11
26	1.78771e-11	1.7637e-11
26.02	1.78756e-11	1.76387e-11
26.04	1.78748e-11	1.7642e-11
26.06	1.78742e-11	1.7637e-11
26.08	1.78783e-11	1.76394e-11
26.1	1.78759e-11	1.76351e-11
26.12	1.78803e-11	1.76397e-11
26.14	1.78875e-11	1.76388e-11
26.16	1.78799e-11	1.7641e-11
26.18	1.78791e-11	1.76371e-11
26.2	1.78777e-11	1.76423e-11
26.22	1.78768e-11	1.76402e-11
26.24	1.78793e-11	1.76489e-11
26.26	1.78762e-11	1.76431e-11
26.28	1.78813e-11	1.76449e-11
26.3	1.78796e-11	1.76359e-11
26.32	1.78815e-11	1.76384e-11
26.34	1.78804e-11	1.76433e-11
26.36	1.78812e-11	1.76403e-11
26.38	1.78826e-11	1.76411e-11
26.4	1.78787e-11	1.76373e-11
26.42	1.78794e-11	1.76403e-11
26.44	1.78806e-11	1.76398e-11
26.46	1.78811e-11	1.76353e-11
26.48	1.78834e-11	1.76319e-11
26.5	1.78773e-11	1.76433e-11
26.52	1.78834e-11	1.76422e-11
26.54	1.78782e-11	1.76396e-11
26.56	1.78838e-11	1.76389e-11
26.58	1.78838e-11	1.76382e-11
26.6	1.7883e-11	1.76283e-11
26.62	1.78823e-11	1.76336e-11
26.64	1.78825e-11	1.76445e-11
26.66	1.78838e-11	1.76403e-11
26.68	1.78872e-11	1.76351e-11
26.7	1.78863e-11	1.76435e-11
26.72	1.78863e-11	1.76381e-11
26.74	1.78892e-11	1.76394e-11
26.76	1.78904e-11	1.76392e-11
26.78	1.78862e-11	1.76437e-11
26.8	1.78889e-11	1.76402e-11
26.82	1.78885e-11	1.76442e-11
26.84	1.78874e-11	1.76517e-11
26.86	1.78889e-11	1.76366e-11
26.88	1.78878e-11	1.76429e-11
26.9	1.78874e-11	1.76467e-11
26.92	1.78892e-11	1.76436e-11
26.94	1.78948e-11	1.76377e-11
26.96	1.7889e-11	1.76454e-11
26.98	1.78883e-11	1.7649e-11
27	1.78993e-11	1.76509e-11
27.02	1.78918e-11	1.76466e-11
27.04	1.78922e-11	1.76441e-11
27.06	1.78965e-11	1.76481e-11
27.08	1.78947e-11	1.76416e-11
27.1	1.78868e-11	1.76484e-11
27.12	1.7893e-11	1.76478e-11
27.14	1.78917e-11	1.76487e-11
27.16	1.78903e-11	1.76524e-11
27.18	1.7889e-11	1.76563e-11
27.2	1.78902e-11	1.76443e-11
27.22	1.78947e-11	1.7646e-11
27.24	1.7893e-11	1.76497e-11
27.26	1.78891e-11	1.76456e-11
27.28	1.78891e-11	1.76393e-11
27.3	1.78976e-11	1.76417e-11
27.32	1.78925e-11	1.76476e-11
27.34	1.78868e-11	1.76427e-11
27.36	1.78645e-11	1.76469e-11
27.38	1.78654e-11	1.76428e-11
27.4	1.78711e-11	1.76474e-11
27.42	1.78653e-11	1.76365e-11
27.44		1.76359e-11
27.46		1.76443e-11
27.48		1.76414e-11
27.5		1.76366e-11
27.52		1.7644e-11
27.54		1.76393e-11
27.56		1.76463e-11
27.58		1.76473e-11
27.6		1.76449e-11
27.62		1.76489e-11
27.64		1.76464e-11
27.66		1.76458e-11
27.68		1.76423e-11
27.7		1.76455e-11
27.72		1.76438e-11
27.74		1.76462e-11
27.76		1.76395e-11
27.78		1.76485e-11
27.8		1.76456e-11
27.82		1.76474e-11
27.84		1.76437e-11
27.86		1.76443e-11
27.88		1.76447e-11
27.9		1.76493e-11
27.92		1.76433e-11
27.94		1.76564e-11
27.96		1.76515e-11
27.98		1.76511e-11
28		1.76492e-11
28.02		1.76486e-11
28.04		1.76416e-11
28.06		1.76501e-11
28.08		1.76507e-11
28.1		1.76502e-11
28.12		1.76435e-11
28.14		1.76534e-11
28.16		1.7644e-11
28.18		1.76511e-11
28.2		1.76558e-11
28.22		1.76568e-11
28.24		1.76512e-11
28.26		1.76524e-11
28.28		1.76558e-11
28.3		1.7652e-11
28.32		1.76621e-11
28.34		1.76541e-11
28.36		1.76581e-11
28.38		1.76486e-11
28.4		1.76486e-11
28.42		1.765e-11
28.44		1.76477e-11
28.46		1.7644e-11
28.48		1.76511e-11
28.5		1.76477e-11
28.52		1.76506e-11
28.54
28.56
28.58
28.6
28.62
28.64
28.66
28.68
28.7
28.72
28.74
28.76
28.78
28.8
28.82
28.84
28.86
28.88
28.9
28.92
28.94
28.96
28.98
29
29.02
29.04
29.06
29.08
29.1
29.12
29.14
29.16
29.18
29.2
29.22
29.24
29.26
29.28
29.3
29.32
29.34
29.36
29.38
29.4
29.42
29.44
29.46
29.48
29.5
29.52
29.54
29.56
29.58
29.6
29.62
29.64
29.66
29.68
29.7
29.72
29.74
29.76
29.78
29.8
29.82
29.84
29.86
29.88
29.9
29.92
29.94
29.96
29.98
30
30.02
30.04
30.06
30.08
30.1
30.12
30.14
30.16
30.18
30.2
30.22
30.24
30.26
30.28
30.3
30.32
30.34
30.36
30.38
30.4
30.42
30.44
30.46
30.48
30.5
30.52
30.54
30.56
30.58
30.6
30.62
30.64
30.66
30.68
30.7
30.72
30.74
30.76
30.78
30.8
30.82
30.84
30.86
30.88
30.9
30.92
30.94
30.96
30.98
31
31.02
31.04
31.06
31.08
31.1
31.12
31.14
31.16
31.18
31.2
31.22
31.24
31.26
31.28
31.3
31.32
31.34
31.36
31.38
31.4
31.42
31.44
31.46
31.48
31.5
31.52
31.54
31.56
31.58
31.6
31.62
31.64
31.66
31.68
31.7
31.72
31.74
31.76
31.78
31.8
31.82
31.84
31.86
31.88
31.9
31.92
31.94
31.96
31.98
32
32.02
32.04
32.06
32.08
32.1
32.12
32.14
32.16
32.18
32.2
32.22
32.24
32.26
32.28
32.3
32.32
32.34
32.36
32.38
32.4
32.42
32.44
32.46
32.48
32.5
32.52
32.54
32.56
32.58
32.6
32.62
32.64
32.66
32.68
32.7
32.72
32.74
32.76
32.78
32.8
32.82
32.84
32.86
32.88
32.9
32.92
32.94
32.96
32.98
33
33.02
33.04
33.06
33.08
33.1
33.12
33.14
33.16
33.18
33.2
33.22
33.24
33.26
33.28
33.3
33.32
33.34
33.36
33.38
33.4
33.42
33.44
33.46
33.48
33.5
33.52
33.54
33.56
33.58
33.6
33.62
33.64
33.66
33.68
33.7
33.72
33.74
33.76
33.78
33.8
33.82
33.84
33.86
33.88
33.9
33.92
33.94
33.96
33.98
34
34.02
34.04
34.06
34.08
34.1
34.12
34.14
34.16
34.18
34.2
34.22
34.24
34.26
34.28
34.3
34.32
34.34
34.36
34.38
34.4
34.42
34.44
34.46
34.48
34.5
34.52
34.54
34.56
34.58
34.6
34.62
34.64
34.66
34.68
34.7
34.72
34.74
34.76
34.78
34.8
34.82
34.84
34.86
34.88
34.9
34.92
34.94
34.96
34.98
35
35.02
35.04
35.06
35.08
35.1
35.12
35.14
35.16
35.18
35.2
35.22
35.24
35.26
35.28
35.3
35.32
35.34
35.36
35.38
35.4
35.42
35.44
35.46
35.48
35.5
35.52
35.54
35.56
35.58
35.6
35.62
35.64
35.66
35.68
35.7
35.72
35.74
35.76
35.78
35.8
35.82
35.84
35.86
35.88
35.9
35.92
35.94
35.96
35.98
36
36.02
36.04
36.06
36.08
36.1
36.12
36.14
36.16
36.18
36.2
36.22
36.24
36.26
36.28
36.3
36.32
36.34
36.36
36.38
36.4
36.42
36.44
36.46
36.48
36.5
36.52
36.54
36.56
36.58
36.6
36.62
36.64
36.66
36.68
36.7
36.72
36.74
36.76
36.78
36.8
36.82
36.84
36.86
36.88
36.9
36.92
36.94
36.96
36.98
37
37.02
37.04
37.06
37.08
37.1
37.12
37.14
37.16
37.18
37.2
37.22
37.24
37.26
37.28
37.3
37.32
37.34
37.36
37.38
37.4
37.42
37.44
37.46
37.48
37.5
37.52
37.54
37.56
37.58
37.6
37.62
37.64
37.66
37.68
37.7
37.72
37.74
37.76
37.78
37.8
37.82
37.84
37.86
37.88
37.9
37.92
37.94
37.96
37.98
38
38.02
38.04
38.06
38.08
38.1
38.12
38.14
38.16
38.18
38.2
38.22
38.24
38.26
38.28
38.3
38.32
38.34
38.36
38.38
38.4
38.42
38.44
38.46
38.48
38.5
38.52
38.54
38.56
38.58
38.6
38.62
38.64
38.66
38.68
38.7
38.72
38.74
38.76
38.78
38.8
38.82
38.84
38.86
38.88
38.9
38.92
38.94
38.96
38.98
39
39.02
39.04
39.06
39.08
39.1
39.12
39.14
39.16
39.18
39.2
39.22
39.24
39.26
39.28
39.3
39.32
39.34
39.36
39.38
39.4
39.42
39.44
39.46
39.48
39.5
39.52
39.54
39.56
39.58
39.6
39.62
39.64
39.66
39.68
39.7
39.72
39.74
39.76
39.78
39.8
39.82
39.84
39.86
39.88
39.9
39.92
39.94
39.96
[truncated: 5,002 more rows]

## Sheet: 17n02028-049.abf
	Cm(F)
Time(ms)	100 uM 5-HT	30 uM 5-HT	10 uM 5-HT	3 uM 5-HT	1 uM 5-HT	0.3 uM 5-HT	0.1 uM 5-HT
0.02	2.40726e-11	2.40866e-11	2.42588e-11	2.4125e-11	2.40494e-11	2.40914e-11	2.44121e-11
0.04	2.40765e-11	2.40836e-11	2.42578e-11	2.41341e-11	2.4046e-11	2.40925e-11	2.44202e-11
0.06	2.40703e-11	2.40842e-11	2.42558e-11	2.41333e-11	2.40485e-11	2.40901e-11	2.44215e-11
0.08	2.40791e-11	2.40839e-11	2.42586e-11	2.41286e-11	2.40469e-11	2.40855e-11	2.44124e-11
0.1	2.40748e-11	2.40874e-11	2.42533e-11	2.41267e-11	2.40464e-11	2.40881e-11	2.44184e-11
0.12	2.40707e-11	2.40939e-11	2.42507e-11	2.41297e-11	2.40435e-11	2.40845e-11	2.44192e-11
0.14	2.40811e-11	2.40861e-11	2.42504e-11	2.41294e-11	2.40444e-11	2.40834e-11	2.44166e-11
0.16	2.40712e-11	2.40876e-11	2.42536e-11	2.41333e-11	2.40453e-11	2.40829e-11	2.4418e-11
0.18	2.40742e-11	2.40868e-11	2.42536e-11	2.41262e-11	2.40538e-11	2.40919e-11	2.44146e-11
0.2	2.4073e-11	2.40832e-11	2.42523e-11	2.41282e-11	2.40452e-11	2.40943e-11	2.44194e-11
0.22	2.40701e-11	2.40857e-11	2.42529e-11	2.41323e-11	2.40469e-11	2.40938e-11	2.44155e-11
0.24	2.40814e-11	2.40883e-11	2.42505e-11	2.41227e-11	2.40451e-11	2.40931e-11	2.44163e-11
0.26	2.40717e-11	2.40882e-11	2.42559e-11	2.413e-11	2.40527e-11	2.40891e-11	2.44225e-11
0.28	2.4079e-11	2.40835e-11	2.42558e-11	2.41301e-11	2.40461e-11	2.40983e-11	2.44214e-11
0.3	2.40728e-11	2.40821e-11	2.42532e-11	2.41305e-11	2.40501e-11	2.40931e-11	2.44155e-11
0.32	2.40734e-11	2.408e-11	2.42577e-11	2.41318e-11	2.40495e-11	2.40932e-11	2.44221e-11
0.34	2.4076e-11	2.40833e-11	2.42516e-11	2.41264e-11	2.40549e-11	2.40978e-11	2.44211e-11
0.36	2.40775e-11	2.40787e-11	2.42492e-11	2.41303e-11	2.40525e-11	2.4097e-11	2.44188e-11
0.38	2.40701e-11	2.40813e-11	2.4257e-11	2.41302e-11	2.40415e-11	2.40936e-11	2.44188e-11
0.4	2.40692e-11	2.40758e-11	2.42562e-11	2.41282e-11	2.40466e-11	2.40925e-11	2.44199e-11
0.42	2.40746e-11	2.40809e-11	2.42544e-11	2.4132e-11	2.40449e-11	2.40937e-11	2.44178e-11
0.44	2.40759e-11	2.4076e-11	2.42572e-11	2.41288e-11	2.40447e-11	2.40982e-11	2.4418e-11
0.46	2.40779e-11	2.40758e-11	2.42574e-11	2.41259e-11	2.40496e-11	2.40984e-11	2.44217e-11
0.48	2.40742e-11	2.40774e-11	2.42584e-11	2.41304e-11	2.40472e-11	2.40955e-11	2.44143e-11
0.5	2.4079e-11	2.40767e-11	2.42611e-11	2.41313e-11	2.40494e-11	2.40945e-11	2.44224e-11
0.52	2.40762e-11	2.40736e-11	2.42559e-11	2.41257e-11	2.40493e-11	2.4093e-11	2.44193e-11
0.54	2.40683e-11	2.40707e-11	2.42562e-11	2.41287e-11	2.40517e-11	2.40968e-11	2.44169e-11
0.56	2.4071e-11	2.40804e-11	2.42528e-11	2.413e-11	2.40458e-11	2.40969e-11	2.44173e-11
0.58	2.40742e-11	2.40711e-11	2.42579e-11	2.41275e-11	2.40514e-11	2.40917e-11	2.44118e-11
0.6	2.40748e-11	2.40749e-11	2.42517e-11	2.41303e-11	2.40537e-11	2.40973e-11	2.44165e-11
0.62	2.40745e-11	2.40843e-11	2.42548e-11	2.41279e-11	2.40454e-11	2.40977e-11	2.44182e-11
0.64	2.40792e-11	2.40828e-11	2.42496e-11	2.41265e-11	2.40478e-11	2.40948e-11	2.44156e-11
0.66	2.40753e-11	2.40815e-11	2.4257e-11	2.41257e-11	2.40472e-11	2.40944e-11	2.44143e-11
0.68	2.4077e-11	2.40755e-11	2.42544e-11	2.41313e-11	2.40473e-11	2.4098e-11	2.44211e-11
0.7	2.40757e-11	2.40786e-11	2.42571e-11	2.41295e-11	2.40446e-11	2.40985e-11	2.44131e-11
0.72	2.4075e-11	2.40828e-11	2.4249e-11	2.41281e-11	2.40443e-11	2.40926e-11	2.44228e-11
0.74	2.40752e-11	2.40742e-11	2.42527e-11	2.413e-11	2.40492e-11	2.40923e-11	2.44184e-11
0.76	2.40714e-11	2.40771e-11	2.42536e-11	2.41315e-11	2.40458e-11	2.40923e-11	2.44188e-11
0.78	2.40813e-11	2.40783e-11	2.42549e-11	2.41296e-11	2.40468e-11	2.40951e-11	2.44146e-11
0.8	2.40783e-11	2.40789e-11	2.4249e-11	2.41263e-11	2.40481e-11	2.40931e-11	2.44205e-11
0.82	2.40767e-11	2.4082e-11	2.42494e-11	2.41312e-11	2.40434e-11	2.40934e-11	2.44196e-11
0.84	2.40769e-11	2.40791e-11	2.42537e-11	2.41315e-11	2.40531e-11	2.40943e-11	2.44176e-11
0.86	2.40754e-11	2.40902e-11	2.4251e-11	2.41294e-11	2.40503e-11	2.40934e-11	2.44162e-11
0.88	2.40744e-11	2.40832e-11	2.42514e-11	2.41367e-11	2.40427e-11	2.40895e-11	2.44189e-11
0.9	2.40761e-11	2.40797e-11	2.42532e-11	2.41369e-11	2.40458e-11	2.40895e-11	2.44145e-11
0.92	2.40745e-11	2.4078e-11	2.42604e-11	2.41309e-11	2.40417e-11	2.40936e-11	2.44189e-11
0.94	2.40703e-11	2.40906e-11	2.42541e-11	2.41346e-11	2.40408e-11	2.41001e-11	2.44156e-11
0.96	2.40767e-11	2.4086e-11	2.42522e-11	2.41306e-11	2.40381e-11	2.40963e-11	2.44142e-11
0.98	2.40736e-11	2.40835e-11	2.42497e-11	2.41299e-11	2.40416e-11	2.40926e-11	2.44145e-11
1	2.40795e-11	2.4084e-11	2.42532e-11	2.4133e-11	2.40356e-11	2.40984e-11	2.44181e-11
1.02	2.40745e-11	2.4079e-11	2.42511e-11	2.41398e-11	2.4033e-11	2.40932e-11	2.4418e-11
1.04	2.40767e-11	2.40749e-11	2.42623e-11	2.41299e-11	2.40416e-11	2.40955e-11	2.44182e-11
1.06	2.40716e-11	2.40853e-11	2.42548e-11	2.41339e-11	2.40385e-11	2.40929e-11	2.44155e-11
1.08	2.40727e-11	2.40815e-11	2.4253e-11	2.41328e-11	2.40351e-11	2.40911e-11	2.44146e-11
1.1	2.40707e-11	2.40856e-11	2.42548e-11	2.41316e-11	2.40377e-11	2.40913e-11	2.44166e-11
1.12	2.40804e-11	2.40839e-11	2.42564e-11	2.41299e-11	2.40378e-11	2.40987e-11	2.44229e-11
1.14	2.40697e-11	2.40829e-11	2.42563e-11	2.41337e-11	2.4041e-11	2.40955e-11	2.44178e-11
1.16	2.4079e-11	2.40828e-11	2.42511e-11	2.41307e-11	2.40305e-11	2.40944e-11	2.44184e-11
1.18	2.40782e-11	2.40802e-11	2.42528e-11	2.41339e-11	2.40367e-11	2.40959e-11	2.44155e-11
1.2	2.40758e-11	2.40871e-11	2.42522e-11	2.413e-11	2.40389e-11	2.40971e-11	2.44216e-11
1.22	2.40763e-11	2.40795e-11	2.42531e-11	2.41284e-11	2.40393e-11	2.40894e-11	2.44182e-11
1.24	2.40725e-11	2.4076e-11	2.42607e-11	2.41279e-11	2.40344e-11	2.40948e-11	2.44201e-11
1.26	2.40726e-11	2.40824e-11	2.42563e-11	2.41315e-11	2.40369e-11	2.40947e-11	2.44181e-11
1.28	2.40709e-11	2.40869e-11	2.42618e-11	2.41281e-11	2.40322e-11	2.40968e-11	2.44195e-11
1.3	2.40774e-11	2.40826e-11	2.42589e-11	2.41268e-11	2.40343e-11	2.40971e-11	2.44177e-11
1.32	2.40716e-11	2.40786e-11	2.42536e-11	2.41319e-11	2.40351e-11	2.40922e-11	2.44161e-11
1.34	2.40767e-11	2.40839e-11	2.42645e-11	2.41269e-11	2.40376e-11	2.41e-11	2.44183e-11
1.36	2.4075e-11	2.40854e-11	2.42553e-11	2.41311e-11	2.40331e-11	2.40935e-11	2.44209e-11
1.38	2.40686e-11	2.40849e-11	2.42541e-11	2.41261e-11	2.40377e-11	2.4094e-11	2.44219e-11
1.4	2.40737e-11	2.40818e-11	2.42543e-11	2.41297e-11	2.40343e-11	2.40989e-11	2.44177e-11
1.42	2.40747e-11	2.4086e-11	2.42528e-11	2.413e-11	2.40375e-11	2.40935e-11	2.44237e-11
1.44	2.4078e-11	2.40866e-11	2.4255e-11	2.41354e-11	2.40402e-11	2.40993e-11	2.4418e-11
1.46	2.40735e-11	2.40863e-11	2.42594e-11	2.41325e-11	2.40342e-11	2.4098e-11	2.44135e-11
1.48	2.407e-11	2.40869e-11	2.4251e-11	2.41312e-11	2.40391e-11	2.41018e-11	2.44179e-11
1.5	2.40741e-11	2.4086e-11	2.42612e-11	2.41357e-11	2.40397e-11	2.40975e-11	2.44175e-11
1.52	2.40746e-11	2.40794e-11	2.42539e-11	2.41364e-11	2.40422e-11	2.4098e-11	2.44214e-11
1.54	2.40803e-11	2.40823e-11	2.42599e-11	2.41293e-11	2.40376e-11	2.41e-11	2.44171e-11
1.56	2.40776e-11	2.40883e-11	2.42581e-11	2.41339e-11	2.40405e-11	2.4098e-11	2.44186e-11
1.58	2.40771e-11	2.40829e-11	2.42603e-11	2.41326e-11	2.40376e-11	2.409e-11	2.44168e-11
1.6	2.4072e-11	2.40871e-11	2.42552e-11	2.4131e-11	2.4041e-11	2.40969e-11	2.44185e-11
1.62	2.40794e-11	2.40805e-11	2.42575e-11	2.41296e-11	2.40402e-11	2.40992e-11	2.44172e-11
1.64	2.40777e-11	2.40892e-11	2.42555e-11	2.41284e-11	2.4044e-11	2.40971e-11	2.44204e-11
1.66	2.40722e-11	2.40799e-11	2.42547e-11	2.41321e-11	2.40352e-11	2.40999e-11	2.44226e-11
1.68	2.40759e-11	2.4079e-11	2.4254e-11	2.41359e-11	2.4038e-11	2.40933e-11	2.44153e-11
1.7	2.40826e-11	2.40872e-11	2.42576e-11	2.4131e-11	2.40417e-11	2.40944e-11	2.44152e-11
1.72	2.40742e-11	2.40839e-11	2.42555e-11	2.41323e-11	2.40389e-11	2.40962e-11	2.44198e-11
1.74	2.40706e-11	2.40853e-11	2.42528e-11	2.41317e-11	2.40418e-11	2.40988e-11	2.44183e-11
1.76	2.40723e-11	2.4086e-11	2.4254e-11	2.41368e-11	2.40428e-11	2.40966e-11	2.44226e-11
1.78	2.40776e-11	2.40817e-11	2.42542e-11	2.41298e-11	2.40433e-11	2.40947e-11	2.44173e-11
1.8	2.40742e-11	2.40829e-11	2.42504e-11	2.41292e-11	2.40436e-11	2.40991e-11	2.44163e-11
1.82	2.40789e-11	2.40815e-11	2.42502e-11	2.41376e-11	2.40378e-11	2.40964e-11	2.4426e-11
1.84	2.40705e-11	2.409e-11	2.42548e-11	2.41281e-11	2.40399e-11	2.40972e-11	2.44216e-11
1.86	2.40823e-11	2.4082e-11	2.4259e-11	2.41368e-11	2.40396e-11	2.40946e-11	2.44202e-11
1.88	2.40759e-11	2.40791e-11	2.42568e-11	2.4131e-11	2.4037e-11	2.40914e-11	2.44215e-11
1.9	2.4074e-11	2.40921e-11	2.42583e-11	2.41362e-11	2.40386e-11	2.40958e-11	2.44147e-11
1.92	2.40682e-11	2.40848e-11	2.42576e-11	2.41344e-11	2.40347e-11	2.40922e-11	2.44158e-11
1.94	2.4075e-11	2.40774e-11	2.42556e-11	2.41301e-11	2.40453e-11	2.40927e-11	2.44206e-11
1.96	2.40802e-11	2.40859e-11	2.42576e-11	2.41339e-11	2.40414e-11	2.40948e-11	2.44152e-11
1.98	2.40783e-11	2.40867e-11	2.42576e-11	2.41382e-11	2.40422e-11	2.41013e-11	2.44229e-11
2	2.40784e-11	2.4089e-11	2.42566e-11	2.41386e-11	2.40437e-11	2.40975e-11	2.44171e-11
2.02	2.40723e-11	2.40911e-11	2.42566e-11	2.4133e-11	2.40378e-11	2.40964e-11	2.44201e-11
2.04	2.40779e-11	2.40852e-11	2.42518e-11	2.41306e-11	2.40424e-11	2.40984e-11	2.44141e-11
2.06	2.4074e-11	2.40846e-11	2.42526e-11	2.41317e-11	2.40402e-11	2.40993e-11	2.44121e-11
2.08	2.40779e-11	2.40851e-11	2.4253e-11	2.41318e-11	2.40411e-11	2.40946e-11	2.44246e-11
2.1	2.40757e-11	2.40868e-11	2.4256e-11	2.4131e-11	2.4039e-11	2.40919e-11	2.44235e-11
2.12	2.40789e-11	2.4084e-11	2.42573e-11	2.41344e-11	2.40433e-11	2.4098e-11	2.44188e-11
2.14	2.40789e-11	2.40868e-11	2.42533e-11	2.41314e-11	2.4044e-11	2.40978e-11	2.44197e-11
2.16	2.40738e-11	2.40853e-11	2.42586e-11	2.41371e-11	2.40426e-11	2.40912e-11	2.44256e-11
2.18	2.40758e-11	2.4087e-11	2.42553e-11	2.41381e-11	2.40419e-11	2.40967e-11	2.44164e-11
2.2	2.40752e-11	2.40836e-11	2.42578e-11	2.41378e-11	2.40412e-11	2.40918e-11	2.44156e-11
2.22	2.40814e-11	2.40848e-11	2.42607e-11	2.41288e-11	2.40412e-11	2.40955e-11	2.44211e-11
2.24	2.40738e-11	2.40876e-11	2.42547e-11	2.41341e-11	2.40427e-11	2.4094e-11	2.44155e-11
2.26	2.40744e-11	2.40852e-11	2.4256e-11	2.41302e-11	2.40442e-11	2.40947e-11	2.44216e-11
2.28	2.40738e-11	2.40814e-11	2.42554e-11	2.4131e-11	2.40398e-11	2.40954e-11	2.44214e-11
2.3	2.4078e-11	2.40851e-11	2.42555e-11	2.41304e-11	2.40451e-11	2.40953e-11	2.44173e-11
2.32	2.40734e-11	2.40896e-11	2.42516e-11	2.41339e-11	2.40417e-11	2.40976e-11	2.44185e-11
2.34	2.40795e-11	2.40877e-11	2.42519e-11	2.41344e-11	2.40385e-11	2.4095e-11	2.44208e-11
2.36	2.40833e-11	2.40866e-11	2.42544e-11	2.41322e-11	2.40443e-11	2.40962e-11	2.44216e-11
2.38	2.40745e-11	2.40869e-11	2.4259e-11	2.41361e-11	2.40321e-11	2.40937e-11	2.44257e-11
2.4	2.40786e-11	2.40873e-11	2.42581e-11	2.41391e-11	2.40423e-11	2.40949e-11	2.44202e-11
2.42	2.40814e-11	2.40818e-11	2.4257e-11	2.41425e-11	2.40362e-11	2.4103e-11	2.44179e-11
2.44	2.40838e-11	2.4079e-11	2.42531e-11	2.4137e-11	2.40379e-11	2.40972e-11	2.4416e-11
2.46	2.40731e-11	2.40839e-11	2.42559e-11	2.41346e-11	2.40411e-11	2.40958e-11	2.44197e-11
2.48	2.40748e-11	2.40892e-11	2.42621e-11	2.41395e-11	2.40418e-11	2.40973e-11	2.44251e-11
2.5	2.40725e-11	2.40808e-11	2.42593e-11	2.41324e-11	2.40416e-11	2.41e-11	2.44216e-11
2.52	2.40849e-11	2.40856e-11	2.42603e-11	2.41328e-11	2.40426e-11	2.40965e-11	2.44219e-11
2.54	2.40776e-11	2.40858e-11	2.42577e-11	2.41405e-11	2.40421e-11	2.40953e-11	2.44237e-11
2.56	2.40721e-11	2.40891e-11	2.42558e-11	2.41317e-11	2.4041e-11	2.41002e-11	2.4422e-11
2.58	2.40728e-11	2.40918e-11	2.42593e-11	2.41359e-11	2.40478e-11	2.40928e-11	2.44143e-11
2.6	2.40764e-11	2.40864e-11	2.42555e-11	2.41327e-11	2.40408e-11	2.40931e-11	2.44231e-11
2.62	2.40741e-11	2.40899e-11	2.42576e-11	2.41328e-11	2.40455e-11	2.40973e-11	2.44247e-11
2.64	2.40745e-11	2.40921e-11	2.42587e-11	2.41325e-11	2.40395e-11	2.40902e-11	2.44227e-11
2.66	2.40794e-11	2.4089e-11	2.42563e-11	2.41376e-11	2.40452e-11	2.40929e-11	2.44224e-11
2.68	2.4073e-11	2.40908e-11	2.42571e-11	2.41375e-11	2.40422e-11	2.40918e-11	2.44185e-11
2.7	2.40762e-11	2.40962e-11	2.42543e-11	2.41368e-11	2.40471e-11	2.40938e-11	2.44194e-11
2.72	2.40746e-11	2.40873e-11	2.4263e-11	2.41351e-11	2.40448e-11	2.40975e-11	2.44195e-11
2.74	2.40809e-11	2.40881e-11	2.42551e-11	2.41394e-11	2.40453e-11	2.41008e-11	2.44231e-11
2.76	2.40768e-11	2.40836e-11	2.42595e-11	2.41377e-11	2.4046e-11	2.40973e-11	2.44245e-11
2.78	2.4079e-11	2.40863e-11	2.42537e-11	2.4135e-11	2.40387e-11	2.41026e-11	2.44221e-11
2.8	2.40786e-11	2.40871e-11	2.42581e-11	2.41378e-11	2.40438e-11	2.40889e-11	2.4421e-11
2.82	2.4075e-11	2.40825e-11	2.42567e-11	2.41371e-11	2.40441e-11	2.4097e-11	2.44186e-11
2.84	2.40765e-11	2.40869e-11	2.42575e-11	2.41379e-11	2.40414e-11	2.40975e-11	2.44198e-11
2.86	2.40805e-11	2.40883e-11	2.42485e-11	2.41338e-11	2.40429e-11	2.40927e-11	2.44203e-11
2.88	2.408e-11	2.40852e-11	2.42501e-11	2.41348e-11	2.40476e-11	2.40857e-11	2.44207e-11
2.9	2.40758e-11	2.40897e-11	2.42518e-11	2.41321e-11	2.40421e-11	2.40908e-11	2.44151e-11
2.92	2.4076e-11	2.40925e-11	2.42555e-11	2.41385e-11	2.40438e-11	2.40987e-11	2.44176e-11
2.94	2.40809e-11	2.40848e-11	2.42562e-11	2.41317e-11	2.40442e-11	2.40914e-11	2.44236e-11
2.96	2.40818e-11	2.40955e-11	2.42531e-11	2.4136e-11	2.40469e-11	2.40878e-11	2.44201e-11
2.98	2.40763e-11	2.40873e-11	2.42554e-11	2.414e-11	2.40444e-11	2.40976e-11	2.44216e-11
3	2.40801e-11	2.40835e-11	2.42617e-11	2.41368e-11	2.40469e-11	2.40949e-11	2.44261e-11
3.02	2.40738e-11	2.40935e-11	2.42569e-11	2.4136e-11	2.4042e-11	2.40935e-11	2.44218e-11
3.04	2.40787e-11	2.40876e-11	2.42528e-11	2.4134e-11	2.40463e-11	2.40934e-11	2.4417e-11
3.06	2.40767e-11	2.40859e-11	2.42474e-11	2.41423e-11	2.40462e-11	2.40949e-11	2.44207e-11
3.08	2.40738e-11	2.40915e-11	2.42571e-11	2.41343e-11	2.40439e-11	2.40952e-11	2.44204e-11
3.1	2.40778e-11	2.40909e-11	2.42571e-11	2.41343e-11	2.40475e-11	2.4093e-11	2.44212e-11
3.12	2.40789e-11	2.40856e-11	2.42553e-11	2.41363e-11	2.40457e-11	2.40943e-11	2.44244e-11
3.14	2.40785e-11	2.4093e-11	2.42529e-11	2.41324e-11	2.40381e-11	2.40952e-11	2.44232e-11
3.16	2.40781e-11	2.40837e-11	2.42518e-11	2.41388e-11	2.40462e-11	2.4095e-11	2.44201e-11
3.18	2.40774e-11	2.40904e-11	2.42599e-11	2.41338e-11	2.40417e-11	2.40989e-11	2.44215e-11
3.2	2.40779e-11	2.40932e-11	2.42502e-11	2.41381e-11	2.40416e-11	2.40897e-11	2.44165e-11
3.22	2.40784e-11	2.40875e-11	2.42614e-11	2.41404e-11	2.40463e-11	2.40979e-11	2.44165e-11
3.24	2.40764e-11	2.40858e-11	2.42533e-11	2.41358e-11	2.4046e-11	2.40907e-11	2.44219e-11
3.26	2.40761e-11	2.40885e-11	2.42592e-11	2.4138e-11	2.40429e-11	2.40948e-11	2.44212e-11
3.28	2.40812e-11	2.40886e-11	2.42563e-11	2.41387e-11	2.4036e-11	2.40922e-11	2.4418e-11
3.3	2.4078e-11	2.40899e-11	2.42592e-11	2.4135e-11	2.40482e-11	2.4091e-11	2.44211e-11
3.32	2.40798e-11	2.40898e-11	2.42515e-11	2.41372e-11	2.40454e-11	2.40936e-11	2.44264e-11
3.34	2.40827e-11	2.4092e-11	2.42568e-11	2.41402e-11	2.40453e-11	2.40989e-11	2.44278e-11
3.36	2.4077e-11	2.40866e-11	2.42575e-11	2.41387e-11	2.40462e-11	2.40994e-11	2.4423e-11
3.38	2.40794e-11	2.40872e-11	2.42514e-11	2.41402e-11	2.40471e-11	2.40942e-11	2.44211e-11
3.4	2.40827e-11	2.40852e-11	2.4251e-11	2.41363e-11	2.40441e-11	2.41e-11	2.44171e-11
3.42	2.40808e-11	2.40904e-11	2.42502e-11	2.41355e-11	2.40514e-11	2.40986e-11	2.44226e-11
3.44	2.4079e-11	2.40878e-11	2.42519e-11	2.41342e-11	2.40494e-11	2.41e-11	2.44246e-11
3.46	2.40851e-11	2.40909e-11	2.42523e-11	2.41366e-11	2.40485e-11	2.40967e-11	2.44205e-11
3.48	2.40792e-11	2.4088e-11	2.42513e-11	2.41383e-11	2.40475e-11	2.4098e-11	2.44257e-11
3.5	2.40805e-11	2.40959e-11	2.42541e-11	2.41421e-11	2.40463e-11	2.40989e-11	2.44167e-11
3.52	2.40776e-11	2.40929e-11	2.42526e-11	2.41342e-11	2.40488e-11	2.40943e-11	2.44191e-11
3.54	2.4073e-11	2.40928e-11	2.42539e-11	2.4138e-11	2.40493e-11	2.40945e-11	2.44106e-11
3.56	2.40783e-11	2.40852e-11	2.42604e-11	2.41427e-11	2.40495e-11	2.40986e-11	2.44197e-11
3.58	2.40798e-11	2.40916e-11	2.42576e-11	2.41374e-11	2.40476e-11	2.40974e-11	2.44236e-11
3.6	2.40702e-11	2.40885e-11	2.42592e-11	2.41357e-11	2.40441e-11	2.4099e-11	2.44181e-11
3.62	2.40755e-11	2.40897e-11	2.42567e-11	2.41427e-11	2.40504e-11	2.41018e-11	2.44186e-11
3.64	2.40836e-11	2.40835e-11	2.42553e-11	2.41373e-11	2.40404e-11	2.41021e-11	2.44236e-11
3.66	2.40778e-11	2.40915e-11	2.42544e-11	2.41346e-11	2.40455e-11	2.40964e-11	2.44192e-11
3.68	2.40809e-11	2.40867e-11	2.42559e-11	2.41452e-11	2.40424e-11	2.41046e-11	2.44186e-11
3.7	2.40848e-11	2.40908e-11	2.4257e-11	2.41415e-11	2.40438e-11	2.4098e-11	2.44245e-11
3.72	2.40778e-11	2.40923e-11	2.42612e-11	2.41369e-11	2.40456e-11	2.40952e-11	2.442e-11
3.74	2.4078e-11	2.40888e-11	2.4259e-11	2.41432e-11	2.40485e-11	2.40931e-11	2.44197e-11
3.76	2.40826e-11	2.40879e-11	2.42579e-11	2.41433e-11	2.40482e-11	2.40965e-11	2.44215e-11
3.78	2.40717e-11	2.40948e-11	2.4263e-11	2.41435e-11	2.40483e-11	2.41007e-11	2.44201e-11
3.8	2.40817e-11	2.40921e-11	2.42525e-11	2.41395e-11	2.40503e-11	2.40996e-11	2.44185e-11
3.82	2.40755e-11	2.40853e-11	2.42532e-11	2.41352e-11	2.40426e-11	2.40978e-11	2.44198e-11
3.84	2.40784e-11	2.40864e-11	2.42586e-11	2.4144e-11	2.40454e-11	2.40975e-11	2.44184e-11
3.86	2.40767e-11	2.40898e-11	2.42567e-11	2.4139e-11	2.40426e-11	2.4098e-11	2.4414e-11
3.88	2.408e-11	2.40956e-11	2.42559e-11	2.41403e-11	2.40477e-11	2.40941e-11	2.44162e-11
3.9	2.4077e-11	2.40969e-11	2.4256e-11	2.41404e-11	2.40455e-11	2.4094e-11	2.44153e-11
3.92	2.40819e-11	2.40947e-11	2.4262e-11	2.41448e-11	2.40468e-11	2.40926e-11	2.44171e-11
3.94	2.4082e-11	2.4085e-11	2.42584e-11	2.41419e-11	2.40483e-11	2.40968e-11	2.44192e-11
3.96	2.40786e-11	2.40959e-11	2.42564e-11	2.41423e-11	2.40503e-11	2.40965e-11	2.44188e-11
3.98	2.40872e-11	2.4094e-11	2.4256e-11	2.41464e-11	2.40492e-11	2.40992e-11	2.4419e-11
4	2.40821e-11	2.40901e-11	2.4255e-11	2.41394e-11	2.40451e-11	2.40953e-11	2.4423e-11
4.02	2.40846e-11	2.40907e-11	2.4256e-11	2.41425e-11	2.40433e-11	2.40976e-11	2.44205e-11
4.04	2.40805e-11	2.4099e-11	2.42596e-11	2.4141e-11	2.40462e-11	2.40943e-11	2.44229e-11
4.06	2.40825e-11	2.40866e-11	2.42596e-11	2.41459e-11	2.40472e-11	2.40964e-11	2.44164e-11
4.08	2.40743e-11	2.40903e-11	2.42577e-11	2.41435e-11	2.40432e-11	2.40961e-11	2.44198e-11
4.1	2.40789e-11	2.40914e-11	2.42565e-11	2.41422e-11	2.40479e-11	2.40937e-11	2.44227e-11
4.12	2.40798e-11	2.40871e-11	2.42553e-11	2.41448e-11	2.4054e-11	2.4099e-11	2.44248e-11
4.14	2.40809e-11	2.40875e-11	2.42586e-11	2.41508e-11	2.40499e-11	2.40932e-11	2.44256e-11
4.16	2.4078e-11	2.40886e-11	2.42573e-11	2.41441e-11	2.4051e-11	2.409e-11	2.4424e-11
4.18	2.40827e-11	2.40893e-11	2.42606e-11	2.41439e-11	2.4042e-11	2.40981e-11	2.44244e-11
4.2	2.40764e-11	2.40874e-11	2.42596e-11	2.41474e-11	2.40439e-11	2.40884e-11	2.44166e-11
4.22	2.40841e-11	2.40904e-11	2.42599e-11	2.41372e-11	2.40422e-11	2.41e-11	2.44203e-11
4.24	2.40834e-11	2.40909e-11	2.42573e-11	2.41413e-11	2.40452e-11	2.40958e-11	2.44231e-11
4.26	2.40818e-11	2.40884e-11	2.42612e-11	2.41473e-11	2.4048e-11	2.41017e-11	2.44209e-11
4.28	2.40844e-11	2.40903e-11	2.426e-11	2.41433e-11	2.4048e-11	2.40982e-11	2.44228e-11
4.3	2.40891e-11	2.40886e-11	2.4257e-11	2.41442e-11	2.40496e-11	2.40972e-11	2.44184e-11
4.32	2.40818e-11	2.40926e-11	2.4256e-11	2.41501e-11	2.40508e-11	2.40992e-11	2.44218e-11
4.34	2.40838e-11	2.40943e-11	2.42581e-11	2.41463e-11	2.40507e-11	2.40926e-11	2.44203e-11
4.36	2.40792e-11	2.40947e-11	2.42607e-11	2.4145e-11	2.40443e-11	2.40942e-11	2.44234e-11
4.38	2.40817e-11	2.40829e-11	2.42576e-11	2.41434e-11	2.40529e-11	2.40966e-11	2.44273e-11
4.4	2.40737e-11	2.4089e-11	2.42626e-11	2.41419e-11	2.405e-11	2.40959e-11	2.44205e-11
4.42	2.4076e-11	2.40863e-11	2.42613e-11	2.4139e-11	2.40492e-11	2.40951e-11	2.44236e-11
4.44	2.40804e-11	2.40869e-11	2.42608e-11	2.41484e-11	2.40462e-11	2.40937e-11	2.44207e-11
4.46	2.40848e-11	2.40896e-11	2.42598e-11	2.41408e-11	2.40525e-11	2.40928e-11	2.44276e-11
4.48	2.40832e-11	2.40958e-11	2.42629e-11	2.41409e-11	2.40525e-11	2.40902e-11	2.44275e-11
4.5	2.4081e-11	2.40966e-11	2.42563e-11	2.41418e-11	2.40518e-11	2.40945e-11	2.44191e-11
4.52	2.40783e-11	2.40914e-11	2.42603e-11	2.41403e-11	2.40455e-11	2.40873e-11	2.44262e-11
4.54	2.40837e-11	2.40873e-11	2.42583e-11	2.41419e-11	2.40537e-11	2.40954e-11	2.44236e-11
4.56	2.40843e-11	2.40903e-11	2.42582e-11	2.41417e-11	2.40507e-11	2.40985e-11	2.4427e-11
4.58	2.408e-11	2.40919e-11	2.42571e-11	2.41427e-11	2.40501e-11	2.4104e-11	2.44215e-11
4.6	2.40768e-11	2.40931e-11	2.42588e-11	2.41428e-11	2.40532e-11	2.40977e-11	2.44242e-11
4.62	2.40781e-11	2.40968e-11	2.42628e-11	2.41401e-11	2.40434e-11	2.4096e-11	2.44234e-11
4.64	2.40822e-11	2.40912e-11	2.42583e-11	2.41435e-11	2.40455e-11	2.40983e-11	2.44199e-11
4.66	2.40765e-11	2.40979e-11	2.42573e-11	2.41444e-11	2.40533e-11	2.40944e-11	2.44298e-11
4.68	2.40798e-11	2.40972e-11	2.42581e-11	2.41415e-11	2.40497e-11	2.40939e-11	2.44261e-11
4.7	2.40784e-11	2.40966e-11	2.42615e-11	2.41374e-11	2.40515e-11	2.40974e-11	2.44188e-11
4.72	2.40808e-11	2.40918e-11	2.42562e-11	2.41423e-11	2.40479e-11	2.40968e-11	2.4429e-11
4.74	2.40766e-11	2.40942e-11	2.42625e-11	2.41439e-11	2.40478e-11	2.40955e-11	2.442e-11
4.76	2.40775e-11	2.40941e-11	2.42568e-11	2.41459e-11	2.40522e-11	2.41026e-11	2.4423e-11
4.78	2.4076e-11	2.40905e-11	2.42633e-11	2.41364e-11	2.40482e-11	2.40998e-11	2.44247e-11
4.8	2.40786e-11	2.40915e-11	2.42558e-11	2.41422e-11	2.40472e-11	2.41006e-11	2.44252e-11
4.82	2.40782e-11	2.40847e-11	2.42611e-11	2.41413e-11	2.40412e-11	2.41032e-11	2.44268e-11
4.84	2.40805e-11	2.40917e-11	2.42559e-11	2.4142e-11	2.40489e-11	2.40991e-11	2.4424e-11
4.86	2.40811e-11	2.4089e-11	2.42577e-11	2.41486e-11	2.40507e-11	2.40986e-11	2.44272e-11
4.88	2.40793e-11	2.40903e-11	2.4257e-11	2.41369e-11	2.40429e-11	2.4099e-11	2.44256e-11
4.9	2.40753e-11	2.40951e-11	2.42577e-11	2.41468e-11	2.40487e-11	2.40985e-11	2.44204e-11
4.92	2.40804e-11	2.40877e-11	2.42576e-11	2.4141e-11	2.40495e-11	2.40952e-11	2.44231e-11
4.94	2.40784e-11	2.40918e-11	2.42567e-11	2.41445e-11	2.40501e-11	2.41032e-11	2.44261e-11
4.96	2.40809e-11	2.40908e-11	2.42537e-11	2.41471e-11	2.40525e-11	2.41015e-11	2.44238e-11
4.98	2.40868e-11	2.40938e-11	2.42586e-11	2.41401e-11	2.40481e-11	2.40999e-11	2.44223e-11
5	2.40851e-11	2.40925e-11	2.42599e-11	2.41404e-11	2.40513e-11	2.41027e-11	2.44235e-11
5.02	2.40769e-11	2.40907e-11	2.42541e-11	2.41415e-11	2.40503e-11	2.40993e-11	2.44237e-11
5.04	2.40817e-11	2.40877e-11	2.4255e-11	2.41407e-11	2.40512e-11	2.40925e-11	2.44178e-11
5.06	2.40754e-11	2.40873e-11	2.42578e-11	2.41464e-11	2.40526e-11	2.40966e-11	2.44238e-11
5.08	2.40823e-11	2.40903e-11	2.4255e-11	2.41441e-11	2.4048e-11	2.41007e-11	2.44172e-11
5.1	2.4081e-11	2.40963e-11	2.42617e-11	2.41432e-11	2.40537e-11	2.41001e-11	2.44251e-11
5.12	2.40833e-11	2.40855e-11	2.42573e-11	2.41451e-11	2.40501e-11	2.40955e-11	2.44233e-11
5.14	2.40843e-11	2.40912e-11	2.42536e-11	2.41425e-11	2.40462e-11	2.41006e-11	2.44246e-11
5.16	2.40843e-11	2.40887e-11	2.42563e-11	2.41419e-11	2.40469e-11	2.41039e-11	2.44255e-11
5.18	2.40823e-11	2.40949e-11	2.42612e-11	2.41489e-11	2.40557e-11	2.4102e-11	2.44243e-11
5.2	2.40757e-11	2.40897e-11	2.42572e-11	2.41414e-11	2.40506e-11	2.41038e-11	2.44247e-11
5.22	2.40774e-11	2.40904e-11	2.42567e-11	2.41438e-11	2.405e-11	2.4102e-11	2.44275e-11
5.24	2.4084e-11	2.40866e-11	2.42579e-11	2.41434e-11	2.40464e-11	2.40992e-11	2.44264e-11
5.26	2.40716e-11	2.40941e-11	2.42584e-11	2.41479e-11	2.40534e-11	2.4096e-11	2.44284e-11
5.28	2.40762e-11	2.40915e-11	2.42525e-11	2.41446e-11	2.40456e-11	2.41037e-11	2.44237e-11
5.3	2.4081e-11	2.40947e-11	2.42526e-11	2.41503e-11	2.40496e-11	2.4095e-11	2.44239e-11
5.32	2.40846e-11	2.40997e-11	2.42542e-11	2.41465e-11	2.40482e-11	2.40979e-11	2.44218e-11
5.34	2.4082e-11	2.4094e-11	2.42555e-11	2.41502e-11	2.40435e-11	2.40984e-11	2.44237e-11
5.36	2.40803e-11	2.4096e-11	2.42585e-11	2.41439e-11	2.40503e-11	2.41025e-11	2.44258e-11
5.38	2.40842e-11	2.40945e-11	2.4258e-11	2.41448e-11	2.40489e-11	2.40952e-11	2.44267e-11
5.4	2.4081e-11	2.40897e-11	2.42575e-11	2.41458e-11	2.40492e-11	2.41052e-11	2.44202e-11
5.42	2.40763e-11	2.40932e-11	2.42585e-11	2.41429e-11	2.405e-11	2.40918e-11	2.44254e-11
5.44	2.40796e-11	2.40952e-11	2.4251e-11	2.41463e-11	2.4047e-11	2.40976e-11	2.44273e-11
5.46	2.40776e-11	2.40994e-11	2.42506e-11	2.4144e-11	2.40541e-11	2.40969e-11	2.4423e-11
5.48	2.40772e-11	2.40957e-11	2.42489e-11	2.41481e-11	2.40531e-11	2.40993e-11	2.4422e-11
5.5	2.40792e-11	2.40947e-11	2.42536e-11	2.41471e-11	2.40514e-11	2.41007e-11	2.44285e-11
5.52	2.40783e-11	2.40961e-11	2.42501e-11	2.41444e-11	2.40471e-11	2.40996e-11	2.44272e-11
5.54	2.40846e-11	2.40967e-11	2.42617e-11	2.41426e-11	2.40515e-11	2.40978e-11	2.44242e-11
5.56	2.40772e-11	2.40926e-11	2.42486e-11	2.4137e-11	2.40493e-11	2.40975e-11	2.44273e-11
5.58	2.40795e-11	2.40902e-11	2.42561e-11	2.41492e-11	2.405e-11	2.40931e-11	2.44229e-11
5.6	2.40813e-11	2.40992e-11	2.42583e-11	2.41497e-11	2.40445e-11	2.41032e-11	2.44275e-11
5.62	2.40795e-11	2.40966e-11	2.42554e-11	2.41425e-11	2.40494e-11	2.40995e-11	2.44223e-11
5.64	2.40797e-11	2.40976e-11	2.42566e-11	2.4142e-11	2.40493e-11	2.40986e-11	2.4419e-11
5.66	2.4078e-11	2.40941e-11	2.42557e-11	2.41449e-11	2.40542e-11	2.40972e-11	2.44202e-11
5.68	2.40751e-11	2.40959e-11	2.42546e-11	2.41442e-11	2.4053e-11	2.4099e-11	2.44323e-11
5.7	2.40787e-11	2.40939e-11	2.42621e-11	2.41475e-11	2.40418e-11	2.40996e-11	2.44217e-11
5.72	2.40791e-11	2.40906e-11	2.42637e-11	2.41476e-11	2.40459e-11	2.41006e-11	2.44212e-11
5.74	2.40823e-11	2.40961e-11	2.42597e-11	2.41439e-11	2.40465e-11	2.40974e-11	2.44238e-11
5.76	2.40845e-11	2.40877e-11	2.42544e-11	2.41438e-11	2.40443e-11	2.4094e-11	2.44252e-11
5.78	2.4078e-11	2.40886e-11	2.42552e-11	2.41477e-11	2.40522e-11	2.41006e-11	2.44219e-11
5.8	2.40816e-11	2.40984e-11	2.42524e-11	2.41518e-11	2.40465e-11	2.41006e-11	2.44162e-11
5.82	2.40806e-11	2.40901e-11	2.42515e-11	2.41444e-11	2.40494e-11	2.40967e-11	2.44265e-11
5.84	2.40788e-11	2.40955e-11	2.4258e-11	2.41472e-11	2.40555e-11	2.41e-11	2.44303e-11
5.86	2.40748e-11	2.40958e-11	2.42474e-11	2.41506e-11	2.40502e-11	2.40978e-11	2.44201e-11
5.88	2.40793e-11	2.40998e-11	2.42537e-11	2.415e-11	2.40499e-11	2.41036e-11	2.44217e-11
5.9	2.40814e-11	2.40998e-11	2.42482e-11	2.41501e-11	2.40485e-11	2.4101e-11	2.4428e-11
5.92	2.40739e-11	2.40983e-11	2.42537e-11	2.41469e-11	2.40521e-11	2.41022e-11	2.44303e-11
5.94	2.40825e-11	2.40952e-11	2.42563e-11	2.41507e-11	2.40464e-11	2.40984e-11	2.44279e-11
5.96	2.40783e-11	2.40958e-11	2.42526e-11	2.41526e-11	2.40514e-11	2.40943e-11	2.44212e-11
5.98	2.40784e-11	2.40912e-11	2.42511e-11	2.41477e-11	2.4046e-11	2.40989e-11	2.44244e-11
6	2.40774e-11	2.40959e-11	2.42556e-11	2.41497e-11	2.4048e-11	2.41001e-11	2.44286e-11
6.02	2.40816e-11	2.40951e-11	2.42509e-11	2.4146e-11	2.40493e-11	2.41011e-11	2.44293e-11
6.04	2.40781e-11	2.40969e-11	2.42562e-11	2.41461e-11	2.4054e-11	2.40974e-11	2.44288e-11
6.06	2.40796e-11	2.40932e-11	2.42489e-11	2.4149e-11	2.40476e-11	2.40989e-11	2.44283e-11
6.08	2.40767e-11	2.40899e-11	2.42508e-11	2.41422e-11	2.4046e-11	2.41016e-11	2.44277e-11
6.1	2.40802e-11	2.40922e-11	2.42545e-11	2.41502e-11	2.40526e-11	2.40963e-11	2.44288e-11
6.12	2.40829e-11	2.40917e-11	2.42566e-11	2.41434e-11	2.40507e-11	2.40941e-11	2.44278e-11
6.14	2.40807e-11	2.40971e-11	2.42561e-11	2.41475e-11	2.40505e-11	2.41001e-11	2.44254e-11
6.16	2.40776e-11	2.40993e-11	2.42567e-11	2.41443e-11	2.40557e-11	2.41083e-11	2.44252e-11
6.18	2.40693e-11	2.40966e-11	2.42539e-11	2.41431e-11	2.4048e-11	2.41049e-11	2.44238e-11
6.2	2.40787e-11	2.40989e-11	2.42529e-11	2.41486e-11	2.40544e-11	2.40971e-11	2.44234e-11
6.22	2.40744e-11	2.41001e-11	2.42553e-11	2.41488e-11	2.40548e-11	2.41052e-11	2.44251e-11
6.24	2.40786e-11	2.40928e-11	2.42499e-11	2.41464e-11	2.40518e-11	2.409e-11	2.44249e-11
6.26	2.40785e-11	2.40902e-11	2.42551e-11	2.4145e-11	2.40519e-11	2.40984e-11	2.44249e-11
6.28	2.40821e-11	2.40957e-11	2.42505e-11	2.4142e-11	2.40457e-11	2.41018e-11	2.44266e-11
6.3	2.40831e-11	2.40923e-11	2.4252e-11	2.41479e-11	2.40452e-11	2.41006e-11	2.44237e-11
6.32	2.40789e-11	2.40951e-11	2.42502e-11	2.41467e-11	2.40476e-11	2.40963e-11	2.44253e-11
6.34	2.40829e-11	2.40927e-11	2.42572e-11	2.415e-11	2.40513e-11	2.40991e-11	2.44227e-11
6.36	2.40885e-11	2.4094e-11	2.42527e-11	2.41433e-11	2.40515e-11	2.41056e-11	2.44246e-11
6.38	2.40847e-11	2.4103e-11	2.42514e-11	2.41443e-11	2.40524e-11	2.41003e-11	2.4424e-11
6.4	2.40865e-11	2.40933e-11	2.42543e-11	2.41447e-11	2.4046e-11	2.41007e-11	2.44262e-11
6.42	2.40814e-11	2.40955e-11	2.42559e-11	2.41429e-11	2.40469e-11	2.40974e-11	2.44298e-11
6.44	2.4082e-11	2.40958e-11	2.42521e-11	2.41474e-11	2.40479e-11	2.41047e-11	2.44246e-11
6.46	2.40834e-11	2.41011e-11	2.42585e-11	2.41473e-11	2.40448e-11	2.41063e-11	2.44291e-11
6.48	2.40809e-11	2.40957e-11	2.4253e-11	2.41488e-11	2.40494e-11	2.40993e-11	2.44263e-11
6.5	2.40803e-11	2.40986e-11	2.42519e-11	2.41517e-11	2.4048e-11	2.41035e-11	2.44238e-11
6.52	2.40842e-11	2.40925e-11	2.42521e-11	2.41516e-11	2.40518e-11	2.41014e-11	2.44224e-11
6.54	2.40869e-11	2.40969e-11	2.42527e-11	2.415e-11	2.4053e-11	2.40969e-11	2.44231e-11
6.56	2.40802e-11	2.4097e-11	2.42526e-11	2.41523e-11	2.4049e-11	2.41013e-11	2.44231e-11
6.58	2.40758e-11	2.40924e-11	2.42501e-11	2.41501e-11	2.40473e-11	2.40985e-11	2.44258e-11
6.6	2.4074e-11	2.4093e-11	2.42554e-11	2.41487e-11	2.40532e-11	2.40941e-11	2.44248e-11
6.62	2.4076e-11	2.40927e-11	2.42488e-11	2.41534e-11	2.40481e-11	2.40966e-11	2.44195e-11
6.64	2.40729e-11	2.40903e-11	2.42546e-11	2.41515e-11	2.40528e-11	2.40999e-11	2.44301e-11
6.66	2.40747e-11	2.40912e-11	2.42575e-11	2.41492e-11	2.40432e-11	2.41011e-11	2.4425e-11
6.68	2.40717e-11	2.40968e-11	2.42507e-11	2.41544e-11	2.406e-11	2.41002e-11	2.44213e-11
6.7	2.40726e-11	2.40953e-11	2.42582e-11	2.41515e-11	2.40503e-11	2.40968e-11	2.44268e-11
6.72	2.40719e-11	2.40984e-11	2.42518e-11	2.41486e-11	2.40505e-11	2.41017e-11	2.44362e-11
6.74	2.40758e-11	2.40947e-11	2.42574e-11	2.41457e-11	2.40526e-11	2.41015e-11	2.44272e-11
6.76	2.4069e-11	2.40911e-11	2.42525e-11	2.41513e-11	2.4053e-11	2.4098e-11	2.44252e-11
6.78	2.40722e-11	2.40953e-11	2.42533e-11	2.41494e-11	2.40528e-11	2.41065e-11	2.44194e-11
6.8	2.40716e-11	2.40991e-11	2.42548e-11	2.41572e-11	2.40514e-11	2.40993e-11	2.44213e-11
6.82	2.40747e-11	2.40989e-11	2.42509e-11	2.41554e-11	2.40473e-11	2.41002e-11	2.44105e-11
6.84	2.4075e-11	2.40956e-11	2.42529e-11	2.41497e-11	2.40502e-11	2.40962e-11	2.44117e-11
6.86	2.40733e-11	2.40901e-11	2.42589e-11	2.41458e-11	2.40537e-11	2.41065e-11	2.44119e-11
6.88	2.40712e-11	2.40885e-11	2.42534e-11	2.41451e-11	2.40511e-11	2.40944e-11	2.43998e-11
6.9	2.4073e-11	2.40964e-11	2.42508e-11	2.41485e-11	2.40548e-11	2.39999e-11	2.43985e-11
6.92	2.40776e-11	2.40931e-11	2.42503e-11	2.41527e-11	2.40516e-11	2.38323e-11	2.43977e-11
6.94	2.40687e-11	2.40991e-11	2.42558e-11	2.41527e-11	2.40529e-11	2.37529e-11	2.44093e-11
6.96	2.40751e-11	2.40939e-11	2.42521e-11	2.41588e-11	2.40531e-11	2.37613e-11	2.44022e-11
6.98	2.40745e-11	2.40951e-11	2.42538e-11	2.41487e-11	2.40551e-11	2.37533e-11	2.44129e-11
7	2.40742e-11	2.40904e-11	2.42576e-11	2.41451e-11	2.40547e-11	2.37529e-11	2.44128e-11
7.02	2.40797e-11	2.40926e-11	2.42537e-11	2.41491e-11	2.40509e-11	2.37606e-11	2.44089e-11
7.04	2.40744e-11	2.40967e-11	2.42582e-11	2.41505e-11	2.40518e-11	2.3764e-11	2.44081e-11
7.06	2.40762e-11	2.40929e-11	2.42576e-11	2.4149e-11	2.40467e-11	2.37734e-11	2.44064e-11
7.08	2.40777e-11	2.40946e-11	2.42608e-11	2.41522e-11	2.40529e-11	2.37725e-11	2.4403e-11
7.1	2.40552e-11	2.40974e-11	2.4252e-11	2.41603e-11	2.40513e-11	2.37753e-11	2.44012e-11
7.12	2.40524e-11	2.40967e-11	2.42514e-11	2.41461e-11	2.40507e-11	2.37845e-11	2.43936e-11
7.14	2.40848e-11	2.40932e-11	2.42555e-11	2.41537e-11	2.40491e-11	2.37765e-11	2.439e-11
7.16	2.40773e-11	2.40943e-11	2.42584e-11	2.41496e-11	2.40458e-11	2.37818e-11	2.43887e-11
7.18	2.40706e-11	2.40989e-11	2.42553e-11	2.41487e-11	2.40524e-11	2.37759e-11	2.43855e-11
7.2	2.39589e-11	2.4097e-11	2.42522e-11	2.41491e-11	2.40503e-11	2.37758e-11	2.43769e-11
7.22	2.37948e-11	2.40962e-11	2.42542e-11	2.41514e-11	2.40534e-11	2.37762e-11	2.43793e-11
7.24	2.37195e-11	2.40912e-11	2.4251e-11	2.41514e-11	2.40477e-11	2.3771e-11	2.43727e-11
7.26	2.36933e-11	2.40965e-11	2.42563e-11	2.41482e-11	2.40443e-11	2.37666e-11	2.43719e-11
7.28	2.36954e-11	2.41009e-11	2.42515e-11	2.4146e-11	2.4044e-11	2.37669e-11	2.43724e-11
7.3	2.36922e-11	2.40954e-11	2.4253e-11	2.41435e-11	2.40503e-11	2.37672e-11	2.4365e-11
7.32	2.36948e-11	2.40957e-11	2.4255e-11	2.41498e-11	2.40524e-11	2.37744e-11	2.43666e-11
7.34	2.37009e-11	2.40974e-11	2.42498e-11	2.41567e-11	2.40522e-11	2.37649e-11	2.43616e-11
7.36	2.37033e-11	2.40908e-11	2.4253e-11	2.41516e-11	2.40515e-11	2.37681e-11	2.43651e-11
7.38	2.37123e-11	2.40871e-11	2.42512e-11	2.41496e-11	2.40506e-11	2.37624e-11	2.43589e-11
7.4	2.37144e-11	2.41e-11	2.42598e-11	2.41511e-11	2.4052e-11	2.37638e-11	2.43537e-11
7.42	2.37213e-11	2.40992e-11	2.42528e-11	2.41552e-11	2.40511e-11	2.37582e-11	2.43595e-11
7.44	2.3723e-11	2.41032e-11	2.42613e-11	2.41527e-11	2.40494e-11	2.37612e-11	2.43488e-11
7.46	2.37261e-11	2.40957e-11	2.42572e-11	2.41503e-11	2.40553e-11	2.37554e-11	2.4358e-11
7.48	2.37298e-11	2.4097e-11	2.42528e-11	2.41494e-11	2.40473e-11	2.37573e-11	2.43491e-11
7.5	2.37347e-11	2.40964e-11	2.42571e-11	2.41494e-11	2.40513e-11	2.37561e-11	2.43517e-11
7.52	2.37235e-11	2.41017e-11	2.42592e-11	2.4153e-11	2.40492e-11	2.37528e-11	2.4346e-11
7.54	2.37255e-11	2.40974e-11	2.4255e-11	2.41525e-11	2.40489e-11	2.37514e-11	2.43472e-11
7.56	2.37247e-11	2.40987e-11	2.42496e-11	2.41572e-11	2.40487e-11	2.37516e-11	2.43465e-11
7.58	2.37293e-11	2.4101e-11	2.4255e-11	2.41509e-11	2.40486e-11	2.37492e-11	2.43463e-11
7.6	2.37254e-11	2.40963e-11	2.42505e-11	2.41511e-11	2.40513e-11	2.37477e-11	2.43388e-11
7.62	2.37287e-11	2.41039e-11	2.42513e-11	2.41454e-11	2.40498e-11	2.37453e-11	2.43433e-11
7.64	2.37173e-11	2.40961e-11	2.42529e-11	2.41571e-11	2.40524e-11	2.37488e-11	2.43415e-11
7.66	2.37219e-11	2.40984e-11	2.42499e-11	2.41507e-11	2.40509e-11	2.37503e-11	2.43436e-11
7.68	2.37232e-11	2.40924e-11	2.4253e-11	2.41545e-11	2.40531e-11	2.37467e-11	2.43362e-11
7.7	2.37195e-11	2.40965e-11	2.42488e-11	2.41581e-11	2.40485e-11	2.37505e-11	2.43415e-11
7.72	2.37143e-11	2.40927e-11	2.42529e-11	2.41518e-11	2.40521e-11	2.3743e-11	2.43417e-11
7.74	2.37179e-11	2.40959e-11	2.4249e-11	2.41569e-11	2.40529e-11	2.37456e-11	2.43361e-11
7.76	2.372e-11	2.40963e-11	2.42524e-11	2.41491e-11	2.40461e-11	2.37448e-11	2.43364e-11
7.78	2.37074e-11	2.40997e-11	2.42527e-11	2.41516e-11	2.40527e-11	2.37353e-11	2.43358e-11
7.8	2.371e-11	2.41012e-11	2.42519e-11	2.41495e-11	2.40532e-11	2.37415e-11	2.43342e-11
7.82	2.37083e-11	2.40953e-11	2.42486e-11	2.41521e-11	2.40515e-11	2.37382e-11	2.43371e-11
7.84	2.3708e-11	2.40988e-11	2.42551e-11	2.41528e-11	2.40471e-11	2.37431e-11	2.4331e-11
7.86	2.37049e-11	2.40977e-11	2.42564e-11	2.41548e-11	2.40524e-11	2.37367e-11	2.43312e-11
7.88	2.37081e-11	2.4101e-11	2.42556e-11	2.41497e-11	2.40511e-11	2.3736e-11	2.4336e-11
7.9	2.37123e-11	2.40963e-11	2.4251e-11	2.41544e-11	2.40505e-11	2.37405e-11	2.43319e-11
7.92	2.3706e-11	2.40956e-11	2.42517e-11	2.41494e-11	2.40523e-11	2.3732e-11	2.43282e-11
7.94	2.37029e-11	2.40922e-11	2.42524e-11	2.41523e-11	2.40474e-11	2.374e-11	2.43307e-11
7.96	2.37064e-11	2.40946e-11	2.42507e-11	2.4152e-11	2.40548e-11	2.37318e-11	2.43316e-11
7.98	2.37062e-11	2.40959e-11	2.42499e-11	2.41504e-11	2.40474e-11	2.37384e-11	2.43236e-11
8	2.36989e-11	2.40892e-11	2.42539e-11	2.41533e-11	2.40467e-11	2.3734e-11	2.43259e-11
8.02	2.37049e-11	2.40888e-11	2.4254e-11	2.41493e-11	2.40498e-11	2.37383e-11	2.43256e-11
8.04	2.37002e-11	2.40941e-11	2.42517e-11	2.41496e-11	2.40497e-11	2.37316e-11	2.43258e-11
8.06	2.36996e-11	2.40942e-11	2.42524e-11	2.41486e-11	2.40526e-11	2.37338e-11	2.43246e-11
8.08	2.36969e-11	2.41006e-11	2.42509e-11	2.4153e-11	2.40467e-11	2.37349e-11	2.43285e-11
8.1	2.37043e-11	2.40982e-11	2.42527e-11	2.41485e-11	2.40491e-11	2.37379e-11	2.43277e-11
8.12	2.36919e-11	2.40943e-11	2.42481e-11	2.41507e-11	2.40483e-11	2.37301e-11	2.43178e-11
8.14	2.36974e-11	2.40941e-11	2.42494e-11	2.41552e-11	2.40511e-11	2.37352e-11	2.43263e-11
8.16	2.36975e-11	2.40924e-11	2.42543e-11	2.41477e-11	2.40472e-11	2.37323e-11	2.43221e-11
8.18	2.36914e-11	2.40921e-11	2.42528e-11	2.41559e-11	2.40484e-11	2.37339e-11	2.43214e-11
8.2	2.36901e-11	2.40941e-11	2.4249e-11	2.41606e-11	2.40527e-11	2.37299e-11	2.43256e-11
8.22	2.36907e-11	2.40999e-11	2.42497e-11	2.4156e-11	2.40494e-11	2.37333e-11	2.43208e-11
8.24	2.3693e-11	2.40979e-11	2.42542e-11	2.41579e-11	2.40501e-11	2.37381e-11	2.43135e-11
8.26	2.36952e-11	2.40945e-11	2.42524e-11	2.41553e-11	2.40526e-11	2.37314e-11	2.43181e-11
8.28	2.3689e-11	2.40983e-11	2.42496e-11	2.41558e-11	2.40538e-11	2.37367e-11	2.43152e-11
8.3	2.36897e-11	2.40897e-11	2.42482e-11	2.41548e-11	2.40507e-11	2.37313e-11	2.43214e-11
8.32	2.36885e-11	2.40951e-11	2.42463e-11	2.41579e-11	2.40513e-11	2.37373e-11	2.43194e-11
8.34	2.36892e-11	2.40929e-11	2.42504e-11	2.41539e-11	2.40518e-11	2.37339e-11	2.43179e-11
8.36	2.36852e-11	2.4095e-11	2.42493e-11	2.41486e-11	2.40484e-11	2.37303e-11	2.43163e-11
8.38	2.36886e-11	2.40956e-11	2.42478e-11	2.41561e-11	2.40514e-11	2.37352e-11	2.43167e-11
8.4	2.36833e-11	2.40945e-11	2.42455e-11	2.41521e-11	2.40504e-11	2.37311e-11	2.43128e-11
8.42	2.36885e-11	2.40991e-11	2.42548e-11	2.41479e-11	2.40547e-11	2.37285e-11	2.43213e-11
8.44	2.36879e-11	2.40982e-11	2.42527e-11	2.41539e-11	2.40429e-11	2.37263e-11	2.43156e-11
8.46	2.36913e-11	2.40833e-11	2.4247e-11	2.41514e-11	2.40566e-11	2.37317e-11	2.43165e-11
8.48	2.36831e-11	2.40643e-11	2.42518e-11	2.41527e-11	2.40497e-11	2.37339e-11	2.43097e-11
8.5	2.36803e-11	2.40391e-11	2.42573e-11	2.41472e-11	2.40477e-11	2.37253e-11	2.43147e-11
8.52	2.36858e-11	2.39523e-11	2.42478e-11	2.4152e-11	2.40569e-11	2.37325e-11	2.43078e-11
8.54	2.3685e-11	2.3815e-11	2.42467e-11	2.41566e-11	2.40519e-11	2.37275e-11	2.43108e-11
8.56	2.36832e-11	2.37459e-11	2.42532e-11	2.41548e-11	2.40515e-11	2.37308e-11	2.4311e-11
8.58	2.36804e-11	2.37173e-11	2.42496e-11	2.41557e-11	2.40578e-11	2.37297e-11	2.43064e-11
8.6	2.3671e-11	2.37211e-11	2.42419e-11	2.41569e-11	2.40506e-11	2.37272e-11	2.43108e-11
8.62	2.36797e-11	2.37207e-11	2.42491e-11	2.41524e-11	2.40503e-11	2.37271e-11	2.43109e-11
8.64	2.36741e-11	2.37233e-11	2.42514e-11	2.41501e-11	2.40539e-11	2.37298e-11	2.43028e-11
8.66	2.36803e-11	2.3737e-11	2.4253e-11	2.41515e-11	2.40552e-11	2.37274e-11	2.43058e-11
8.68	2.36743e-11	2.37378e-11	2.42493e-11	2.41506e-11	2.40545e-11	2.37267e-11	2.43025e-11
8.7	2.36742e-11	2.37422e-11	2.42497e-11	2.41531e-11	2.4054e-11	2.37205e-11	2.43065e-11
8.72	2.36772e-11	2.37331e-11	2.42535e-11	2.41595e-11	2.40553e-11	2.37256e-11	2.43091e-11
8.74	2.36753e-11	2.37397e-11	2.42558e-11	2.41503e-11	2.40495e-11	2.37291e-11	2.43076e-11
8.76	2.36781e-11	2.37322e-11	2.42493e-11	2.41484e-11	2.4055e-11	2.37245e-11	2.43032e-11
8.78	2.36842e-11	2.37386e-11	2.42475e-11	2.41575e-11	2.40517e-11	2.3729e-11	2.43058e-11
8.8	2.36825e-11	2.37355e-11	2.42499e-11	2.41565e-11	2.40538e-11	2.37278e-11	2.43001e-11
8.82	2.36698e-11	2.37349e-11	2.42474e-11	2.41552e-11	2.40543e-11	2.37273e-11	2.43057e-11
8.84	2.36716e-11	2.37386e-11	2.42506e-11	2.41479e-11	2.40507e-11	2.37273e-11	2.4304e-11
8.86	2.36685e-11	2.37379e-11	2.42481e-11	2.41539e-11	2.40519e-11	2.37235e-11	2.43018e-11
8.88	2.36727e-11	2.37272e-11	2.42466e-11	2.41495e-11	2.40546e-11	2.37268e-11	2.43035e-11
8.9	2.3675e-11	2.37277e-11	2.42479e-11	2.41546e-11	2.40563e-11	2.37253e-11	2.43022e-11
8.92	2.36726e-11	2.37285e-11	2.42427e-11	2.41557e-11	2.40538e-11	2.37262e-11	2.43003e-11
8.94	2.36719e-11	2.37233e-11	2.42446e-11	2.41502e-11	2.40526e-11	2.37248e-11	2.43044e-11
8.96	2.36709e-11	2.37321e-11	2.42494e-11	2.41537e-11	2.40472e-11	2.37265e-11	2.43043e-11
8.98	2.36681e-11	2.37266e-11	2.42446e-11	2.41529e-11	2.40526e-11	2.37297e-11	2.43029e-11
9	2.36726e-11	2.37234e-11	2.42432e-11	2.41546e-11	2.40567e-11	2.37266e-11	2.43076e-11
9.02	2.36701e-11	2.37242e-11	2.42467e-11	2.41524e-11	2.40485e-11	2.37267e-11	2.4301e-11
9.04	2.36749e-11	2.37217e-11	2.42456e-11	2.4154e-11	2.40542e-11	2.3722e-11	2.43039e-11
9.06	2.36691e-11	2.37199e-11	2.42467e-11	2.41555e-11	2.40496e-11	2.37337e-11	2.4302e-11
9.08	2.36693e-11	2.37186e-11	2.42494e-11	2.41503e-11	2.40512e-11	2.3726e-11	2.43e-11
9.1	2.36735e-11	2.37229e-11	2.42439e-11	2.41538e-11	2.40522e-11	2.37256e-11	2.43051e-11
9.12	2.36758e-11	2.37127e-11	2.42469e-11	2.41542e-11	2.40526e-11	2.37279e-11	2.4304e-11
9.14	2.3671e-11	2.37158e-11	2.42465e-11	2.41517e-11	2.40511e-11	2.37183e-11	2.43041e-11
9.16	2.36723e-11	2.37151e-11	2.42455e-11	2.41548e-11	2.40496e-11	2.37235e-11	2.43026e-11
9.18	2.36749e-11	2.37139e-11	2.42449e-11	2.41536e-11	2.40484e-11	2.37272e-11	2.4304e-11
9.2	2.36726e-11	2.37113e-11	2.42465e-11	2.41596e-11	2.40533e-11	2.37177e-11	2.43024e-11
9.22	2.36669e-11	2.37117e-11	2.42467e-11	2.41559e-11	2.40518e-11	2.37196e-11	2.43015e-11
9.24	2.36703e-11	2.37107e-11	2.42441e-11	2.41621e-11	2.40552e-11	2.37292e-11	2.43068e-11
9.26	2.36682e-11	2.37045e-11	2.42462e-11	2.41527e-11	2.40496e-11	2.3725e-11	2.43021e-11
9.28	2.36656e-11	2.3706e-11	2.42471e-11	2.41558e-11	2.40504e-11	2.37225e-11	2.43058e-11
9.3	2.36714e-11	2.37014e-11	2.42461e-11	2.41621e-11	2.40472e-11	2.37231e-11	2.4305e-11
9.32	2.36718e-11	2.3699e-11	2.42535e-11	2.41571e-11	2.40468e-11	2.37177e-11	2.42969e-11
9.34	2.3665e-11	2.36963e-11	2.42398e-11	2.41552e-11	2.40481e-11	2.37173e-11	2.42952e-11
9.36	2.36703e-11	2.36967e-11	2.42486e-11	2.41562e-11	2.40501e-11	2.37198e-11	2.43011e-11
9.38	2.36704e-11	2.36993e-11	2.42445e-11	2.41539e-11	2.40506e-11	2.37193e-11	2.42972e-11
9.4	2.36717e-11	2.36986e-11	2.42498e-11	2.41598e-11	2.40514e-11	2.3721e-11	2.43023e-11
9.42	2.367e-11	2.36957e-11	2.42429e-11	2.41567e-11	2.40509e-11	2.37226e-11	2.43003e-11
9.44	2.36656e-11	2.36974e-11	2.42471e-11	2.41578e-11	2.40475e-11	2.37216e-11	2.43035e-11
9.46	2.36703e-11	2.36959e-11	2.42451e-11	2.41529e-11	2.40543e-11	2.37212e-11	2.4295e-11
9.48	2.36665e-11	2.36938e-11	2.42454e-11	2.4155e-11	2.40508e-11	2.37173e-11	2.42984e-11
9.5	2.36698e-11	2.37e-11	2.42441e-11	2.41476e-11	2.40487e-11	2.37206e-11	2.42944e-11
9.52	2.36701e-11	2.3694e-11	2.42416e-11	2.41586e-11	2.4044e-11	2.3714e-11	2.43006e-11
9.54	2.36651e-11	2.36952e-11	2.42435e-11	2.41597e-11	2.40451e-11	2.37135e-11	2.42983e-11
9.56	2.36734e-11	2.3697e-11	2.4249e-11	2.41589e-11	2.40435e-11	2.37152e-11	2.42984e-11
9.58	2.36656e-11	2.36951e-11	2.42442e-11	2.41598e-11	2.40491e-11	2.37181e-11	2.42948e-11
9.6	2.36708e-11	2.36955e-11	2.42436e-11	2.41343e-11	2.40462e-11	2.37169e-11	2.43024e-11
9.62	2.36677e-11	2.36941e-11	2.42412e-11	2.40648e-11	2.40456e-11	2.37151e-11	2.42927e-11
9.64	2.36611e-11	2.36948e-11	2.42445e-11	2.39783e-11	2.40435e-11	2.37139e-11	2.42992e-11
9.66	2.36616e-11	2.36887e-11	2.42449e-11	2.39325e-11	2.40475e-11	2.37178e-11	2.42991e-11
9.68	2.36641e-11	2.36889e-11	2.42404e-11	2.39135e-11	2.40522e-11	2.37154e-11	2.42992e-11
9.7	2.36698e-11	2.36884e-11	2.42386e-11	2.39096e-11	2.40444e-11	2.37148e-11	2.4291e-11
9.72	2.36665e-11	2.36912e-11	2.42382e-11	2.39131e-11	2.40471e-11	2.37111e-11	2.4303e-11
9.74	2.36719e-11	2.36876e-11	2.42415e-11	2.39227e-11	2.40435e-11	2.37163e-11	2.4298e-11
9.76	2.3671e-11	2.3697e-11	2.42432e-11	2.39144e-11	2.40478e-11	2.37168e-11	2.42971e-11
9.78	2.36676e-11	2.36906e-11	2.42423e-11	2.39072e-11	2.40434e-11	2.37101e-11	2.42968e-11
9.8	2.36652e-11	2.3693e-11	2.42414e-11	2.38977e-11	2.40482e-11	2.37093e-11	2.42926e-11
9.82	2.3665e-11	2.36851e-11	2.42393e-11	2.38844e-11	2.40505e-11	2.37191e-11	2.4295e-11
9.84	2.36663e-11	2.36912e-11	2.42439e-11	2.38845e-11	2.40499e-11	2.37095e-11	2.42927e-11
9.86	2.36657e-11	2.36915e-11	2.42384e-11	2.38775e-11	2.40498e-11	2.37142e-11	2.42958e-11
9.88	2.36694e-11	2.36927e-11	2.42415e-11	2.38708e-11	2.40461e-11	2.37082e-11	2.42984e-11
9.9	2.36655e-11	2.36869e-11	2.42424e-11	2.38628e-11	2.40424e-11	2.37103e-11	2.42961e-11
9.92	2.36576e-11	2.3694e-11	2.42427e-11	2.38599e-11	2.40448e-11	2.37162e-11	2.42947e-11
9.94	2.36618e-11	2.36898e-11	2.4199e-11	2.38553e-11	2.4049e-11	2.37106e-11	2.4298e-11
9.96	2.36658e-11	2.36844e-11	2.42289e-11	2.38508e-11	2.40475e-11	2.37129e-11	2.42971e-11
9.98	2.36653e-11	2.36851e-11	2.42235e-11	2.38498e-11	2.40489e-11	2.37098e-11	2.43001e-11
10	2.3661e-11	2.36837e-11	2.42233e-11	2.38408e-11	2.40471e-11	2.3718e-11	2.42967e-11
10.02	2.36596e-11	2.36827e-11	2.4176e-11	2.38352e-11	2.40444e-11	2.37151e-11	2.42996e-11
10.04	2.36547e-11	2.36793e-11	2.41275e-11	2.38408e-11	2.40517e-11	2.37146e-11	2.4298e-11
10.06	2.36705e-11	2.36772e-11	2.40926e-11	2.38318e-11	2.40449e-11	2.37125e-11	2.42982e-11
10.08	2.36635e-11	2.36782e-11	2.40614e-11	2.38322e-11	2.40447e-11	2.37094e-11	2.42963e-11
10.1	2.36651e-11	2.36746e-11	2.40461e-11	2.38263e-11	2.40507e-11	2.37131e-11	2.4306e-11
10.12	2.36647e-11	2.36793e-11	2.40249e-11	2.38258e-11	2.40435e-11	2.37113e-11	2.42952e-11
10.14	2.3661e-11	2.36793e-11	2.4012e-11	2.38209e-11	2.40462e-11	2.37119e-11	2.42988e-11
10.16	2.36584e-11	2.36768e-11	2.39916e-11	2.3818e-11	2.40444e-11	2.37171e-11	2.43016e-11
10.18	2.36696e-11	2.3676e-11	2.39835e-11	2.38101e-11	2.40436e-11	2.37086e-11	2.42929e-11
10.2	2.36643e-11	2.36777e-11	2.39666e-11	2.38104e-11	2.40514e-11	2.37161e-11	2.43006e-11
10.22	2.36609e-11	2.36807e-11	2.39545e-11	2.38087e-11	2.40448e-11	2.37121e-11	2.42965e-11
10.24	2.3663e-11	2.36735e-11	2.3945e-11	2.38051e-11	2.40426e-11	2.37184e-11	2.42984e-11
10.26	2.36613e-11	2.3679e-11	2.39312e-11	2.38061e-11	2.40477e-11	2.37164e-11	2.42967e-11
10.28	2.36622e-11	2.36824e-11	2.39206e-11	2.38013e-11	2.40447e-11	2.37117e-11	2.42969e-11
10.3	2.36569e-11	2.36719e-11	2.39086e-11	2.37959e-11	2.40459e-11	2.3715e-11	2.42957e-11
10.32	2.36571e-11	2.36759e-11	2.39068e-11	2.37943e-11	2.40459e-11	2.37142e-11	2.42943e-11
10.34	2.36668e-11	2.36766e-11	2.38997e-11	2.37999e-11	2.40441e-11	2.3712e-11	2.4295e-11
10.36	2.36592e-11	2.36754e-11	2.38996e-11	2.37947e-11	2.40466e-11	2.37121e-11	2.42946e-11
10.38	2.36605e-11	2.36699e-11	2.38948e-11	2.37956e-11	2.40435e-11	2.3714e-11	2.42987e-11
10.4	2.36616e-11	2.36776e-11	2.38897e-11	2.37933e-11	2.40482e-11	2.37101e-11	2.4301e-11
10.42	2.36631e-11	2.36773e-11	2.38857e-11	2.37864e-11	2.40487e-11	2.37082e-11	2.42966e-11
10.44	2.36667e-11	2.36706e-11	2.38772e-11	2.37878e-11	2.40442e-11	2.37161e-11	2.42979e-11
10.46	2.36594e-11	2.36776e-11	2.38718e-11	2.37845e-11	2.40455e-11	2.37076e-11	2.42994e-11
10.48	2.36578e-11	2.36747e-11	2.38715e-11	2.37803e-11	2.40431e-11	2.37126e-11	2.42969e-11
10.5	2.36605e-11	2.36749e-11	2.38735e-11	2.37839e-11	2.40485e-11	2.3712e-11	2.42995e-11
10.52	2.36595e-11	2.3675e-11	2.38664e-11	2.37855e-11	2.40501e-11	2.37099e-11	2.42941e-11
10.54	2.36595e-11	2.36752e-11	2.38629e-11	2.37831e-11	2.40509e-11	2.37086e-11	2.42971e-11
10.56	2.36644e-11	2.36794e-11	2.38615e-11	2.37811e-11	2.40458e-11	2.37063e-11	2.42944e-11
10.58	2.3663e-11	2.36763e-11	2.38542e-11	2.37819e-11	2.40406e-11	2.37056e-11	2.43049e-11
10.6	2.3664e-11	2.36769e-11	2.38539e-11	2.37811e-11	2.40435e-11	2.37084e-11	2.43033e-11
10.62	2.36673e-11	2.36747e-11	2.3858e-11	2.3775e-11	2.40475e-11	2.37075e-11	2.42922e-11
10.64	2.36623e-11	2.36768e-11	2.38446e-11	2.37731e-11	2.40447e-11	2.37093e-11	2.42944e-11
10.66	2.36652e-11	2.36732e-11	2.38389e-11	2.37714e-11	2.40432e-11	2.37103e-11	2.4294e-11
10.68	2.36592e-11	2.36721e-11	2.38406e-11	2.37712e-11	2.40471e-11	2.37055e-11	2.42981e-11
10.7	2.36591e-11	2.36787e-11	2.38402e-11	2.37743e-11	2.40439e-11	2.37123e-11	2.42945e-11
10.72	2.3657e-11	2.3676e-11	2.38389e-11	2.3765e-11	2.4049e-11	2.3706e-11	2.42948e-11
10.74	2.36593e-11	2.36699e-11	2.38368e-11	2.37736e-11	2.40478e-11	2.3711e-11	2.42962e-11
10.76	2.36628e-11	2.36798e-11	2.38328e-11	2.37659e-11	2.40435e-11	2.37074e-11	2.42938e-11
10.78	2.36566e-11	2.36776e-11	2.38343e-11	2.37673e-11	2.40487e-11	2.37109e-11	2.42973e-11
10.8	2.36596e-11	2.36768e-11	2.38241e-11	2.37627e-11	2.40463e-11	2.37075e-11	2.42974e-11
10.82	2.36597e-11	2.3675e-11	2.38301e-11	2.37646e-11	2.40489e-11	2.37092e-11	2.42988e-11
10.84	2.3656e-11	2.36721e-11	2.38319e-11	2.37584e-11	2.40477e-11	2.37111e-11	2.42989e-11
10.86	2.3659e-11	2.36723e-11	2.38201e-11	2.3762e-11	2.40459e-11	2.37087e-11	2.42943e-11
10.88	2.36576e-11	2.36754e-11	2.382e-11	2.37564e-11	2.4042e-11	2.37075e-11	2.43006e-11
10.9	2.36577e-11	2.36682e-11	2.38221e-11	2.37579e-11	2.40421e-11	2.37081e-11	2.42967e-11
10.92	2.36556e-11	2.36701e-11	2.382e-11	2.37539e-11	2.40448e-11	2.37064e-11	2.43022e-11
10.94	2.36619e-11	2.36779e-11	2.38183e-11	2.37554e-11	2.40445e-11	2.3713e-11	2.43036e-11
10.96	2.36591e-11	2.36779e-11	2.38171e-11	2.37589e-11	2.40481e-11	2.37065e-11	2.43023e-11
10.98	2.36559e-11	2.36784e-11	2.38198e-11	2.37572e-11	2.40483e-11	2.37127e-11	2.43005e-11
11	2.36584e-11	2.3674e-11	2.38167e-11	2.37509e-11	2.40465e-11	2.37169e-11	2.42959e-11
11.02	2.36549e-11	2.36694e-11	2.38126e-11	2.37553e-11	2.40451e-11	2.37142e-11	2.43e-11
11.04	2.3657e-11	2.36763e-11	2.38106e-11	2.37469e-11	2.40434e-11	2.37065e-11	2.4297e-11
11.06	2.36558e-11	2.36763e-11	2.3806e-11	2.37524e-11	2.40494e-11	2.37059e-11	2.43036e-11
11.08	2.36584e-11	2.36774e-11	2.38088e-11	2.37491e-11	2.40488e-11	2.37061e-11	2.42997e-11
11.1	2.36622e-11	2.3678e-11	2.38068e-11	2.37509e-11	2.40482e-11	2.37124e-11	2.43008e-11
11.12	2.36536e-11	2.36732e-11	2.38042e-11	2.37479e-11	2.40451e-11	2.37074e-11	2.43019e-11
11.14	2.36541e-11	2.36754e-11	2.38008e-11	2.37464e-11	2.40432e-11	2.37117e-11	2.4301e-11
11.16	2.36543e-11	2.36767e-11	2.38044e-11	2.37522e-11	2.40444e-11	2.37077e-11	2.43024e-11
11.18	2.36574e-11	2.36773e-11	2.38016e-11	2.37444e-11	2.40475e-11	2.37075e-11	2.43016e-11
11.2	2.36618e-11	2.36731e-11	2.3809e-11	2.37478e-11	2.40493e-11	2.37027e-11	2.42966e-11
11.22	2.3665e-11	2.3675e-11	2.37941e-11	2.37475e-11	2.40501e-11	2.37e-11	2.43004e-11
11.24	2.36585e-11	2.36748e-11	2.37987e-11	2.37426e-11	2.40466e-11	2.37055e-11	2.42978e-11
11.26	2.3659e-11	2.36734e-11	2.37953e-11	2.37453e-11	2.40471e-11	2.37057e-11	2.43034e-11
11.28	2.36664e-11	2.36759e-11	2.37992e-11	2.37455e-11	2.40462e-11	2.37074e-11	2.4301e-11
11.3	2.36578e-11	2.36813e-11	2.37972e-11	2.37446e-11	2.40495e-11	2.37052e-11	2.43041e-11
11.32	2.36604e-11	2.36711e-11	2.37979e-11	2.37454e-11	2.405e-11	2.37052e-11	2.4299e-11
11.34	2.36589e-11	2.36705e-11	2.37966e-11	2.3751e-11	2.40488e-11	2.37058e-11	2.4302e-11
11.36	2.36542e-11	2.36731e-11	2.37984e-11	2.37349e-11	2.40483e-11	2.37038e-11	2.42958e-11
11.38	2.36578e-11	2.36772e-11	2.37925e-11	2.37437e-11	2.4048e-11	2.3701e-11	2.42975e-11
11.4	2.36535e-11	2.36736e-11	2.37955e-11	2.37448e-11	2.40471e-11	2.37052e-11	2.43004e-11
11.42	2.36494e-11	2.36757e-11	2.3794e-11	2.37385e-11	2.40527e-11	2.37079e-11	2.42991e-11
11.44	2.36512e-11	2.36733e-11	2.37934e-11	2.37413e-11	2.40468e-11	2.37086e-11	2.4306e-11
11.46	2.36518e-11	2.36724e-11	2.37953e-11	2.37368e-11	2.40467e-11	2.37049e-11	2.43008e-11
11.48	2.36561e-11	2.36729e-11	2.37942e-11	2.37444e-11	2.40468e-11	2.37061e-11	2.4299e-11
11.5	2.36594e-11	2.36692e-11	2.37899e-11	2.3738e-11	2.4041e-11	2.37044e-11	2.43037e-11
11.52	2.36595e-11	2.36758e-11	2.37957e-11	2.37376e-11	2.40497e-11	2.37031e-11	2.43077e-11
11.54	2.36554e-11	2.3674e-11	2.37866e-11	2.37346e-11	2.40503e-11	2.37049e-11	2.42975e-11
11.56	2.36513e-11	2.3674e-11	2.37865e-11	2.37404e-11	2.40497e-11	2.37021e-11	2.43015e-11
11.58	2.36546e-11	2.36776e-11	2.37854e-11	2.37329e-11	2.40471e-11	2.3705e-11	2.43006e-11
11.6	2.36532e-11	2.36761e-11	2.37873e-11	2.37312e-11	2.40485e-11	2.37037e-11	2.42946e-11
11.62	2.36586e-11	2.36777e-11	2.37895e-11	2.3737e-11	2.40517e-11	2.37065e-11	2.42989e-11
11.64	2.36489e-11	2.36745e-11	2.37844e-11	2.37376e-11	2.40483e-11	2.37026e-11	2.43105e-11
11.66	2.36499e-11	2.36756e-11	2.37862e-11	2.37355e-11	2.40476e-11	2.3707e-11	2.43037e-11
11.68	2.36583e-11	2.36862e-11	2.37868e-11	2.37298e-11	2.40463e-11	2.3707e-11	2.43031e-11
11.7	2.36525e-11	2.36758e-11	2.37863e-11	2.37286e-11	2.40477e-11	2.37082e-11	2.43017e-11
11.72	2.3651e-11	2.36697e-11	2.3783e-11	2.37248e-11	2.40484e-11	2.37071e-11	2.43056e-11
11.74	2.36534e-11	2.36738e-11	2.37828e-11	2.3724e-11	2.40441e-11	2.37061e-11	2.43007e-11
11.76	2.36473e-11	2.3675e-11	2.37785e-11	2.37249e-11	2.40468e-11	2.3704e-11	2.43002e-11
11.78	2.36539e-11	2.36711e-11	2.37837e-11	2.37299e-11	2.40454e-11	2.3698e-11	2.4304e-11
11.8	2.3659e-11	2.36776e-11	2.37773e-11	2.3728e-11	2.4053e-11	2.37021e-11	2.4303e-11
11.82	2.36612e-11	2.36715e-11	2.37775e-11	2.37304e-11	2.40479e-11	2.37003e-11	2.43034e-11
11.84	2.36572e-11	2.36658e-11	2.37829e-11	2.37273e-11	2.40533e-11	2.3704e-11	2.42984e-11
11.86	2.36605e-11	2.36731e-11	2.37731e-11	2.37269e-11	2.40505e-11	2.37005e-11	2.43084e-11
11.88	2.36533e-11	2.36688e-11	2.37781e-11	2.37213e-11	2.40495e-11	2.37058e-11	2.4306e-11
11.9	2.36541e-11	2.36709e-11	2.37776e-11	2.37289e-11	2.40483e-11	2.37041e-11	2.42981e-11
11.92	2.36543e-11	2.36695e-11	2.37789e-11	2.37285e-11	2.40487e-11	2.37098e-11	2.43062e-11
11.94	2.36528e-11	2.36662e-11	2.37739e-11	2.37268e-11	2.4058e-11	2.37038e-11	2.43051e-11
11.96	2.36602e-11	2.36699e-11	2.37821e-11	2.3721e-11	2.40531e-11	2.3703e-11	2.43022e-11
11.98	2.365e-11	2.36635e-11	2.3775e-11	2.37259e-11	2.40464e-11	2.3702e-11	2.42979e-11
12	2.36509e-11	2.3671e-11	2.37773e-11	2.37169e-11	2.40492e-11	2.37016e-11	2.43076e-11
12.02	2.36558e-11	2.36752e-11	2.37778e-11	2.37176e-11	2.40477e-11	2.37031e-11	2.43027e-11
12.04	2.36541e-11	2.36741e-11	2.3776e-11	2.37252e-11	2.4053e-11	2.37013e-11	2.43058e-11
12.06	2.36519e-11	2.36732e-11	2.37778e-11	2.37235e-11	2.4046e-11	2.37009e-11	2.43015e-11
12.08	2.36525e-11	2.3669e-11	2.37752e-11	2.37178e-11	2.40485e-11	2.36993e-11	2.43079e-11
12.1	2.3655e-11	2.36768e-11	2.37732e-11	2.37246e-11	2.40479e-11	2.37059e-11	2.43078e-11
12.12	2.36519e-11	2.36767e-11	2.37744e-11	2.37252e-11	2.40501e-11	2.37033e-11	2.43061e-11
12.14	2.36588e-11	2.36743e-11	2.37734e-11	2.37271e-11	2.40478e-11	2.37032e-11	2.43035e-11
12.16	2.36472e-11	2.36698e-11	2.37754e-11	2.37254e-11	2.40501e-11	2.37057e-11	2.43069e-11
12.18	2.36596e-11	2.36783e-11	2.37783e-11	2.37228e-11	2.40464e-11	2.37078e-11	2.43055e-11
12.2	2.36548e-11	2.36799e-11	2.37719e-11	2.37201e-11	2.40514e-11	2.37061e-11	2.43042e-11
12.22	2.36493e-11	2.36714e-11	2.37761e-11	2.37229e-11	2.40513e-11	2.37054e-11	2.43028e-11
12.24	2.36544e-11	2.36708e-11	2.37787e-11	2.37239e-11	2.4045e-11	2.37002e-11	2.42991e-11
12.26	2.36533e-11	2.36759e-11	2.37804e-11	2.37233e-11	2.40462e-11	2.37029e-11	2.43035e-11
12.28	2.36583e-11	2.36715e-11	2.37715e-11	2.37263e-11	2.40493e-11	2.37026e-11	2.43066e-11
12.3	2.3656e-11	2.3674e-11	2.3776e-11	2.37183e-11	2.40514e-11	2.37081e-11	2.43018e-11
12.32	2.36549e-11	2.36738e-11	2.37742e-11	2.3719e-11	2.4052e-11	2.37054e-11	2.43062e-11
12.34	2.36517e-11	2.36778e-11	2.37732e-11	2.37181e-11	2.40499e-11	2.3707e-11	2.43082e-11
12.36	2.36537e-11	2.36801e-11	2.37731e-11	2.37179e-11	2.405e-11	2.37017e-11	2.43094e-11
12.38	2.36534e-11	2.36708e-11	2.3766e-11	2.37152e-11	2.40501e-11	2.37061e-11	2.43028e-11
12.4	2.36548e-11	2.3673e-11	2.37745e-11	2.37195e-11	2.40522e-11	2.37016e-11	2.43031e-11
12.42	2.36516e-11	2.36789e-11	2.37751e-11	2.3717e-11	2.40479e-11	2.37052e-11	2.4307e-11
12.44	2.3656e-11	2.3674e-11	2.37731e-11	2.37141e-11	2.40509e-11	2.37028e-11	2.43043e-11
12.46	2.36631e-11	2.36761e-11	2.37707e-11	2.37158e-11	2.40499e-11	2.37096e-11	2.43039e-11
12.48	2.3654e-11	2.36758e-11	2.37698e-11	2.37142e-11	2.40457e-11	2.37002e-11	2.43047e-11
12.5	2.36545e-11	2.36746e-11	2.37757e-11	2.3716e-11	2.40499e-11	2.3703e-11	2.43046e-11
12.52	2.36539e-11	2.36793e-11	2.37726e-11	2.37204e-11	2.40439e-11	2.3704e-11	2.43061e-11
12.54	2.36585e-11	2.36737e-11	2.37696e-11	2.3716e-11	2.40513e-11	2.37032e-11	2.43023e-11
12.56	2.36544e-11	2.36752e-11	2.37758e-11	2.37203e-11	2.40482e-11	2.3702e-11	2.43069e-11
12.58	2.36503e-11	2.36802e-11	2.37771e-11	2.37131e-11	2.40461e-11	2.37016e-11	2.43079e-11
12.6	2.365e-11	2.36802e-11	2.37692e-11	2.3719e-11	2.40437e-11	2.37029e-11	2.4308e-11
12.62	2.3647e-11	2.36759e-11	2.37714e-11	2.37135e-11	2.40508e-11	2.37074e-11	2.43057e-11
12.64	2.36533e-11	2.36768e-11	2.37684e-11	2.37144e-11	2.40508e-11	2.37053e-11	2.43066e-11
12.66	2.36535e-11	2.36764e-11	2.37689e-11	2.37114e-11	2.40502e-11	2.37055e-11	2.43077e-11
12.68	2.3654e-11	2.36809e-11	2.37669e-11	2.37148e-11	2.40508e-11	2.37e-11	2.43069e-11
12.7	2.36541e-11	2.36815e-11	2.37684e-11	2.37125e-11	2.40556e-11	2.37047e-11	2.43116e-11
12.72	2.36465e-11	2.3679e-11	2.37723e-11	2.37155e-11	2.40475e-11	2.37065e-11	2.43119e-11
12.74	2.36486e-11	2.36755e-11	2.377e-11	2.37169e-11	2.40529e-11	2.3704e-11	2.43083e-11
12.76	2.36484e-11	2.36785e-11	2.37717e-11	2.37149e-11	2.40526e-11	2.37057e-11	2.43092e-11
12.78	2.36486e-11	2.36766e-11	2.37661e-11	2.37149e-11	2.40488e-11	2.37076e-11	2.43124e-11
12.8	2.36487e-11	2.36785e-11	2.37703e-11	2.37081e-11	2.40507e-11	2.37019e-11	2.43146e-11
12.82	2.36492e-11	2.36798e-11	2.3766e-11	2.37106e-11	2.40502e-11	2.37124e-11	2.43058e-11
12.84	2.36533e-11	2.36786e-11	2.37712e-11	2.37113e-11	2.40521e-11	2.37061e-11	2.43101e-11
12.86	2.3656e-11	2.36735e-11	2.37672e-11	2.37129e-11	2.40531e-11	2.36983e-11	2.43114e-11
12.88	2.36471e-11	2.36744e-11	2.37701e-11	2.37146e-11	2.4054e-11	2.37038e-11	2.43076e-11
12.9	2.36578e-11	2.36716e-11	2.37711e-11	2.37066e-11	2.40554e-11	2.37027e-11	2.43089e-11
12.92	2.36552e-11	2.36758e-11	2.37617e-11	2.37108e-11	2.40541e-11	2.37023e-11	2.43088e-11
12.94	2.36515e-11	2.36777e-11	2.37668e-11	2.37098e-11	2.40525e-11	2.37035e-11	2.43083e-11
12.96	2.36557e-11	2.36761e-11	2.37657e-11	2.37084e-11	2.4055e-11	2.3703e-11	2.43128e-11
12.98	2.36558e-11	2.36849e-11	2.37654e-11	2.37076e-11	2.40538e-11	2.3706e-11	2.43136e-11
13	2.36572e-11	2.36795e-11	2.37682e-11	2.37088e-11	2.40503e-11	2.37019e-11	2.43134e-11
13.02	2.36531e-11	2.36811e-11	2.37677e-11	2.371e-11	2.40507e-11	2.36978e-11	2.43108e-11
13.04	2.3649e-11	2.36853e-11	2.37697e-11	2.37091e-11	2.40468e-11	2.37033e-11	2.43091e-11
13.06	2.365e-11	2.3679e-11	2.37709e-11	2.37041e-11	2.40478e-11	2.37085e-11	2.43107e-11
13.08	2.36524e-11	2.36838e-11	2.37622e-11	2.37121e-11	2.40491e-11	2.36993e-11	2.43124e-11
13.1	2.36543e-11	2.36798e-11	2.37692e-11	2.37118e-11	2.40459e-11	2.37019e-11	2.431e-11
13.12	2.36518e-11	2.36791e-11	2.37608e-11	2.3708e-11	2.40521e-11	2.37066e-11	2.43093e-11
13.14	2.36484e-11	2.36862e-11	2.37655e-11	2.37066e-11	2.4046e-11	2.37012e-11	2.43165e-11
13.16	2.36597e-11	2.36806e-11	2.37647e-11	2.37102e-11	2.40477e-11	2.36971e-11	2.43109e-11
13.18	2.36566e-11	2.36813e-11	2.37645e-11	2.37095e-11	2.40542e-11	2.37071e-11	2.43156e-11
13.2	2.36563e-11	2.36863e-11	2.37621e-11	2.37031e-11	2.40507e-11	2.37008e-11	2.43161e-11
13.22	2.36579e-11	2.36871e-11	2.37647e-11	2.37069e-11	2.40478e-11	2.36991e-11	2.43166e-11
13.24	2.36479e-11	2.36865e-11	2.37694e-11	2.37091e-11	2.40468e-11	2.37005e-11	2.4313e-11
13.26	2.36472e-11	2.36779e-11	2.37696e-11	2.37021e-11	2.40473e-11	2.36994e-11	2.43143e-11
13.28	2.36524e-11	2.36866e-11	2.37663e-11	2.3701e-11	2.40436e-11	2.37035e-11	2.43186e-11
13.3	2.3651e-11	2.36811e-11	2.37633e-11	2.37045e-11	2.40474e-11	2.36986e-11	2.43192e-11
13.32	2.36512e-11	2.36841e-11	2.37631e-11	2.37084e-11	2.40503e-11	2.37023e-11	2.43137e-11
13.34	2.36445e-11	2.36853e-11	2.37627e-11	2.37056e-11	2.40464e-11	2.37022e-11	2.43148e-11
13.36	2.36513e-11	2.36807e-11	2.37682e-11	2.37074e-11	2.40542e-11	2.37012e-11	2.43189e-11
13.38	2.36462e-11	2.3693e-11	2.37608e-11	2.37058e-11	2.40478e-11	2.36971e-11	2.4312e-11
13.4	2.36487e-11	2.36832e-11	2.37661e-11	2.37025e-11	2.40503e-11	2.3699e-11	2.43091e-11
13.42	2.36502e-11	2.36825e-11	2.37669e-11	2.36982e-11	2.40504e-11	2.37094e-11	2.43147e-11
13.44	2.36476e-11	2.36818e-11	2.37684e-11	2.37053e-11	2.4054e-11	2.37076e-11	2.43187e-11
13.46	2.3655e-11	2.3685e-11	2.37629e-11	2.3704e-11	2.40453e-11	2.36997e-11	2.4316e-11
13.48	2.36545e-11	2.36814e-11	2.37632e-11	2.37043e-11	2.40515e-11	2.37062e-11	2.4319e-11
13.5	2.3651e-11	2.36854e-11	2.37641e-11	2.37014e-11	2.40484e-11	2.37001e-11	2.43185e-11
13.52	2.36529e-11	2.36839e-11	2.37677e-11	2.37089e-11	2.40508e-11	2.37061e-11	2.43136e-11
13.54	2.36583e-11	2.36863e-11	2.37626e-11	2.37015e-11	2.40522e-11	2.37032e-11	2.43198e-11
13.56	2.36559e-11	2.36851e-11	2.37655e-11	2.37042e-11	2.40542e-11	2.37021e-11	2.43205e-11
13.58	2.36536e-11	2.36815e-11	2.3761e-11	2.37031e-11	2.40508e-11	2.3706e-11	2.43155e-11
13.6	2.36506e-11	2.3682e-11	2.3756e-11	2.37034e-11	2.40549e-11	2.37049e-11	2.43216e-11
13.62	2.36576e-11	2.36875e-11	2.37615e-11	2.36988e-11	2.40522e-11	2.37006e-11	2.43214e-11
13.64	2.36553e-11	2.36844e-11	2.37652e-11	2.36996e-11	2.40569e-11	2.37006e-11	2.43189e-11
13.66	2.36556e-11	2.36828e-11	2.37684e-11	2.36969e-11	2.40523e-11	2.3699e-11	2.43125e-11
13.68	2.36537e-11	2.36786e-11	2.37647e-11	2.37056e-11	2.40555e-11	2.36972e-11	2.43192e-11
13.7	2.36555e-11	2.36838e-11	2.37682e-11	2.37047e-11	2.40587e-11	2.37022e-11	2.4319e-11
13.72	2.36522e-11	2.36863e-11	2.37677e-11	2.36977e-11	2.40568e-11	2.37021e-11	2.43199e-11
13.74	2.3652e-11	2.3684e-11	2.37653e-11	2.37026e-11	2.40527e-11	2.36974e-11	2.43226e-11
13.76	2.36601e-11	2.36826e-11	2.37635e-11	2.37019e-11	2.40492e-11	2.37018e-11	2.43158e-11
13.78	2.36552e-11	2.36859e-11	2.37595e-11	2.36991e-11	2.40484e-11	2.36974e-11	2.43242e-11
13.8	2.36558e-11	2.36852e-11	2.37648e-11	2.37023e-11	2.40526e-11	2.37064e-11	2.43178e-11
13.82	2.36518e-11	2.36844e-11	2.37637e-11	2.36939e-11	2.40513e-11	2.36943e-11	2.43213e-11
13.84	2.36517e-11	2.36834e-11	2.37673e-11	2.37048e-11	2.40589e-11	2.37025e-11	2.43205e-11
13.86	2.36556e-11	2.36797e-11	2.37618e-11	2.36995e-11	2.40532e-11	2.37049e-11	2.43198e-11
13.88	2.36604e-11	2.36811e-11	2.37684e-11	2.37006e-11	2.40528e-11	2.37015e-11	2.43158e-11
13.9	2.36561e-11	2.36873e-11	2.37679e-11	2.37001e-11	2.40558e-11	2.37034e-11	2.43176e-11
13.92	2.36559e-11	2.36962e-11	2.37618e-11	2.37012e-11	2.40583e-11	2.37122e-11	2.43168e-11
13.94	2.36586e-11	2.36856e-11	2.37618e-11	2.37006e-11	2.40503e-11	2.37023e-11	2.43174e-11
13.96	2.36552e-11	2.36835e-11	2.37639e-11	2.37037e-11	2.40542e-11	2.37031e-11	2.43194e-11
13.98	2.36535e-11	2.36913e-11	2.37614e-11	2.37028e-11	2.40543e-11	2.37016e-11	2.43193e-11
14	2.36531e-11	2.36944e-11	2.37631e-11	2.37002e-11	2.40505e-11	2.36995e-11	2.43164e-11
14.02	2.36535e-11	2.3692e-11	2.376e-11	2.36989e-11	2.40597e-11	2.37021e-11	2.43189e-11
14.04	2.36613e-11	2.36885e-11	2.37648e-11	2.37013e-11	2.40537e-11	2.36991e-11	2.43206e-11
14.06	2.36517e-11	2.36901e-11	2.3763e-11	2.37017e-11	2.40515e-11	2.3711e-11	2.43199e-11
14.08	2.36622e-11	2.36943e-11	2.37607e-11	2.36973e-11	2.40548e-11	2.37065e-11	2.43205e-11
14.1	2.36547e-11	2.36899e-11	2.37614e-11	2.36998e-11	2.40525e-11	2.37061e-11	2.43274e-11
14.12	2.36495e-11	2.36856e-11	2.37637e-11	2.3693e-11	2.40568e-11	2.37038e-11	2.432e-11
14.14	2.36574e-11	2.36985e-11	2.37626e-11	2.37046e-11	2.40513e-11	2.37024e-11	2.43185e-11
14.16	2.36515e-11	2.36947e-11	2.37674e-11	2.36968e-11	2.40521e-11	2.3707e-11	2.43264e-11
14.18	2.36588e-11	2.36944e-11	2.37595e-11	2.36995e-11	2.40474e-11	2.37097e-11	2.43256e-11
14.2	2.36551e-11	2.36927e-11	2.37615e-11	2.37017e-11	2.40508e-11	2.37062e-11	2.43244e-11
14.22	2.3651e-11	2.36906e-11	2.37663e-11	2.36954e-11	2.40551e-11	2.37106e-11	2.43235e-11
14.24	2.36535e-11	2.37012e-11	2.3764e-11	2.36976e-11	2.40522e-11	2.37105e-11	2.4327e-11
14.26	2.36548e-11	2.36931e-11	2.3766e-11	2.36942e-11	2.40552e-11	2.37074e-11	2.43288e-11
14.28	2.3655e-11	2.36918e-11	2.37632e-11	2.37032e-11	2.40522e-11	2.37162e-11	2.4321e-11
14.3	2.36602e-11	2.36919e-11	2.37625e-11	2.36992e-11	2.40576e-11	2.37111e-11	2.4321e-11
14.32	2.36545e-11	2.36876e-11	2.3766e-11	2.36921e-11	2.405e-11	2.37071e-11	2.43215e-11
14.34	2.36578e-11	2.3686e-11	2.37648e-11	2.37008e-11	2.40492e-11	2.37072e-11	2.43261e-11
14.36	2.3651e-11	2.36956e-11	2.37635e-11	2.36977e-11	2.40546e-11	2.37064e-11	2.43213e-11
14.38	2.36546e-11	2.36939e-11	2.37629e-11	2.36857e-11	2.40508e-11	2.37006e-11	2.43257e-11
14.4	2.36481e-11	2.36983e-11	2.37727e-11	2.36936e-11	2.40515e-11	2.37071e-11	2.43266e-11
14.42	2.36506e-11	2.36938e-11	2.37662e-11	2.36903e-11	2.40516e-11	2.37065e-11	2.43292e-11
14.44	2.36546e-11	2.36942e-11	2.37662e-11	2.36922e-11	2.40535e-11	2.37053e-11	2.43235e-11
14.46	2.36569e-11	2.36914e-11	2.37622e-11	2.36987e-11	2.40578e-11	2.37124e-11	2.4326e-11
14.48	2.36599e-11	2.36948e-11	2.37624e-11	2.36937e-11	2.40568e-11	2.37109e-11	2.43274e-11
14.5	2.36519e-11	2.36964e-11	2.37627e-11	2.36946e-11	2.4053e-11	2.3709e-11	2.43265e-11
14.52	2.36496e-11	2.36955e-11	2.37647e-11	2.36966e-11	2.40562e-11	2.37023e-11	2.4334e-11
14.54	2.36575e-11	2.36955e-11	2.37679e-11	2.36943e-11	2.40497e-11	2.37091e-11	2.4332e-11
14.56	2.36515e-11	2.36977e-11	2.37651e-11	2.36968e-11	2.4059e-11	2.37093e-11	2.43278e-11
14.58	2.36629e-11	2.36951e-11	2.37596e-11	2.36965e-11	2.40557e-11	2.37118e-11	2.43345e-11
14.6	2.36561e-11	2.37004e-11	2.37613e-11	2.36947e-11	2.4055e-11	2.3705e-11	2.4328e-11
14.62	2.36578e-11	2.37e-11	2.37647e-11	2.36973e-11	2.40519e-11	2.37088e-11	2.43325e-11
14.64	2.3658e-11	2.36931e-11	2.37684e-11	2.36924e-11	2.40514e-11	2.37089e-11	2.43325e-11
14.66	2.36604e-11	2.36934e-11	2.3762e-11	2.36924e-11	2.40534e-11	2.37078e-11	2.43318e-11
14.68	2.36561e-11	2.36969e-11	2.37633e-11	2.36946e-11	2.40944e-11	2.37083e-11	2.43306e-11
14.7	2.36579e-11	2.36971e-11	2.37661e-11	2.3692e-11	2.40596e-11	2.37105e-11	2.43271e-11
14.72	2.36605e-11	2.36955e-11	2.37637e-11	2.36993e-11	2.40626e-11	2.37103e-11	2.43335e-11
14.74	2.36618e-11	2.3689e-11	2.37647e-11	2.36933e-11	2.40241e-11	2.37166e-11	2.43325e-11
14.76	2.36565e-11	2.36963e-11	2.3758e-11	2.36908e-11	2.38662e-11	2.37124e-11	2.43354e-11
14.78	2.36585e-11	2.36944e-11	2.37547e-11	2.36918e-11	2.3755e-11	2.37099e-11	2.43354e-11
14.8	2.36591e-11	2.3695e-11	2.37689e-11	2.36885e-11	2.37266e-11	2.37153e-11	2.43333e-11
14.82	2.36598e-11	2.36946e-11	2.3761e-11	2.36942e-11	2.37161e-11	2.37111e-11	2.43332e-11
14.84	2.36585e-11	2.36945e-11	2.37615e-11	2.36875e-11	2.37079e-11	2.37143e-11	2.43385e-11
14.86	2.36592e-11	2.3697e-11	2.37627e-11	2.3697e-11	2.37117e-11	2.37133e-11	2.43348e-11
14.88	2.36549e-11	2.36977e-11	2.37654e-11	2.36897e-11	2.37215e-11	2.37089e-11	2.43336e-11
14.9	2.36597e-11	2.36916e-11	2.37639e-11	2.36927e-11	2.37288e-11	2.37104e-11	2.4338e-11
14.92	2.36692e-11	2.36972e-11	2.37629e-11	2.36937e-11	2.37368e-11	2.37168e-11	2.43366e-11
14.94	2.36642e-11	2.36959e-11	2.37651e-11	2.36934e-11	2.3751e-11	2.37086e-11	2.4326e-11
14.96	2.36626e-11	2.36998e-11	2.37634e-11	2.36895e-11	2.37451e-11	2.371e-11	2.43366e-11
14.98	2.36587e-11	2.36928e-11	2.37573e-11	2.3694e-11	2.3741e-11	2.37126e-11	2.43341e-11
15	2.36597e-11	2.37018e-11	2.37646e-11	2.36896e-11	2.37343e-11	2.37083e-11	2.43337e-11
15.02	2.36591e-11	2.36991e-11	2.37614e-11	2.36939e-11	2.37248e-11	2.37087e-11	2.43337e-11
15.04	2.36545e-11	2.37023e-11	2.37626e-11	2.3697e-11	2.37295e-11	2.37118e-11	2.4335e-11
15.06	2.3659e-11	2.36942e-11	2.37679e-11	2.3691e-11	2.37263e-11	2.37167e-11	2.43345e-11
15.08	2.36602e-11	2.36991e-11	2.37616e-11	2.36955e-11	2.37174e-11	2.37163e-11	2.43309e-11
15.1	2.36547e-11	2.36992e-11	2.37654e-11	2.37001e-11	2.37119e-11	2.37094e-11	2.43377e-11
15.12	2.36599e-11	2.3701e-11	2.37639e-11	2.36938e-11	2.37127e-11	2.37142e-11	2.43367e-11
15.14	2.36617e-11	2.3703e-11	2.37586e-11	2.3693e-11	2.3708e-11	2.37077e-11	2.43337e-11
15.16	2.36645e-11	2.36954e-11	2.37628e-11	2.36952e-11	2.37073e-11	2.37196e-11	2.4334e-11
15.18	2.36604e-11	2.3699e-11	2.37594e-11	2.36923e-11	2.37035e-11	2.37173e-11	2.43376e-11
15.2	2.36611e-11	2.37045e-11	2.37662e-11	2.36916e-11	2.36973e-11	2.37083e-11	2.43372e-11
15.22	2.36669e-11	2.37034e-11	2.37651e-11	2.36907e-11	2.3698e-11	2.3719e-11	2.43305e-11
15.24	2.3659e-11	2.37019e-11	2.37636e-11	2.37002e-11	2.36946e-11	2.37193e-11	2.43326e-11
15.26	2.36572e-11	2.36994e-11	2.37646e-11	2.36972e-11	2.36987e-11	2.37146e-11	2.43388e-11
15.28	2.36645e-11	2.36982e-11	2.37612e-11	2.36955e-11	2.36889e-11	2.37209e-11	2.43386e-11
15.3	2.36625e-11	2.37021e-11	2.37627e-11	2.36949e-11	2.36881e-11	2.37192e-11	2.43394e-11
15.32	2.36686e-11	2.3703e-11	2.37622e-11	2.37007e-11	2.36892e-11	2.37172e-11	2.43362e-11
15.34	2.36625e-11	2.37071e-11	2.37655e-11	2.36929e-11	2.36879e-11	2.37217e-11	2.43334e-11
15.36	2.36636e-11	2.37044e-11	2.37618e-11	2.36927e-11	2.36805e-11	2.37145e-11	2.43432e-11
15.38	2.36621e-11	2.37054e-11	2.37687e-11	2.3699e-11	2.36811e-11	2.37098e-11	2.43378e-11
15.4	2.36589e-11	2.37006e-11	2.3763e-11	2.3693e-11	2.36778e-11	2.37128e-11	2.43387e-11
15.42	2.366e-11	2.37113e-11	2.37645e-11	2.36928e-11	2.36789e-11	2.37126e-11	2.43409e-11
15.44	2.36641e-11	2.37071e-11	2.37597e-11	2.36981e-11	2.36719e-11	2.37207e-11	2.43397e-11
15.46	2.36643e-11	2.37079e-11	2.37624e-11	2.36906e-11	2.36737e-11	2.37167e-11	2.43391e-11
15.48	2.36661e-11	2.37086e-11	2.37614e-11	2.36908e-11	2.36698e-11	2.37151e-11	2.43436e-11
15.5	2.36662e-11	2.3709e-11	2.37611e-11	2.36931e-11	2.36697e-11	2.37238e-11	2.43411e-11
15.52	2.36676e-11	2.37123e-11	2.37652e-11	2.36934e-11	2.36596e-11	2.37185e-11	2.43441e-11
15.54	2.3665e-11	2.37131e-11	2.37644e-11	2.36932e-11	2.36696e-11	2.37191e-11	2.43443e-11
15.56	2.36675e-11	2.37079e-11	2.37631e-11	2.36855e-11	2.36643e-11	2.3718e-11	2.43432e-11
15.58	2.36609e-11	2.37096e-11	2.37656e-11	2.36847e-11	2.36635e-11	2.37188e-11	2.43406e-11
15.6	2.3661e-11	2.37116e-11	2.37641e-11	2.3688e-11	2.36635e-11	2.37159e-11	2.43369e-11
15.62	2.36688e-11	2.37106e-11	2.37605e-11	2.36915e-11	2.36653e-11	2.37165e-11	2.43384e-11
15.64	2.36685e-11	2.37061e-11	2.37584e-11	2.36889e-11	2.3661e-11	2.37173e-11	2.43367e-11
15.66	2.36607e-11	2.37103e-11	2.37599e-11	2.36909e-11	2.3659e-11	2.37212e-11	2.43391e-11
15.68	2.36642e-11	2.37064e-11	2.37663e-11	2.36908e-11	2.36558e-11	2.37145e-11	2.43459e-11
15.7	2.36652e-11	2.37117e-11	2.3764e-11	2.36891e-11	2.36567e-11	2.37203e-11	2.43462e-11
15.72	2.36645e-11	2.37053e-11	2.37607e-11	2.36933e-11	2.36542e-11	2.37182e-11	2.43458e-11
15.74	2.36632e-11	2.37022e-11	2.37637e-11	2.36896e-11	2.3652e-11	2.37184e-11	2.43441e-11
15.76	2.36683e-11	2.37094e-11	2.37663e-11	2.3692e-11	2.36553e-11	2.37184e-11	2.43445e-11
15.78	2.36697e-11	2.37045e-11	2.37649e-11	2.36921e-11	2.36536e-11	2.37211e-11	2.43359e-11
15.8	2.36678e-11	2.37106e-11	2.37623e-11	2.36903e-11	2.36489e-11	2.37239e-11	2.43366e-11
15.82	2.36672e-11	2.37094e-11	2.37685e-11	2.36867e-11	2.36544e-11	2.3721e-11	2.4337e-11
15.84	2.36657e-11	2.37106e-11	2.37662e-11	2.36918e-11	2.36528e-11	2.37241e-11	2.43416e-11
15.86	2.36609e-11	2.37085e-11	2.3761e-11	2.3692e-11	2.36508e-11	2.37234e-11	2.43402e-11
15.88	2.36691e-11	2.37107e-11	2.37639e-11	2.36946e-11	2.36514e-11	2.3722e-11	2.43454e-11
15.9	2.36711e-11	2.37173e-11	2.3773e-11	2.36982e-11	2.36506e-11	2.37262e-11	2.43422e-11
15.92	2.36675e-11	2.37145e-11	2.37632e-11	2.36954e-11	2.36493e-11	2.37175e-11	2.43401e-11
15.94	2.36658e-11	2.37115e-11	2.37692e-11	2.36931e-11	2.36435e-11	2.37204e-11	2.43483e-11
15.96	2.36701e-11	2.37173e-11	2.37622e-11	2.36942e-11	2.36429e-11	2.37221e-11	2.43414e-11
15.98	2.36729e-11	2.3719e-11	2.37683e-11	2.36951e-11	2.3648e-11	2.37203e-11	2.43416e-11
16	2.36717e-11	2.3713e-11	2.37654e-11	2.36978e-11	2.3645e-11	2.37229e-11	2.43471e-11
16.02	2.36699e-11	2.37184e-11	2.37714e-11	2.36965e-11	2.36429e-11	2.37211e-11	2.43473e-11
16.04	2.36708e-11	2.37204e-11	2.37632e-11	2.3694e-11	2.36419e-11	2.37272e-11	2.43433e-11
16.06	2.3667e-11	2.37179e-11	2.37665e-11	2.36878e-11	2.36401e-11	2.37156e-11	2.43469e-11
16.08	2.36656e-11	2.37186e-11	2.37674e-11	2.36958e-11	2.36402e-11	2.37243e-11	2.43483e-11
16.1	2.36692e-11	2.3721e-11	2.37685e-11	2.36929e-11	2.36436e-11	2.37269e-11	2.43471e-11
16.12	2.36684e-11	2.37197e-11	2.37666e-11	2.36893e-11	2.36401e-11	2.37261e-11	2.43477e-11
16.14	2.36674e-11	2.37196e-11	2.37705e-11	2.36916e-11	2.36419e-11	2.37295e-11	2.43504e-11
16.16	2.36709e-11	2.37107e-11	2.37663e-11	2.36934e-11	2.36344e-11	2.3728e-11	2.43507e-11
16.18	2.36693e-11	2.37176e-11	2.37642e-11	2.36917e-11	2.36361e-11	2.37224e-11	2.43433e-11
16.2	2.36739e-11	2.37157e-11	2.37601e-11	2.36913e-11	2.36379e-11	2.37346e-11	2.43551e-11
16.22	2.36671e-11	2.37221e-11	2.37642e-11	2.36931e-11	2.36367e-11	2.37279e-11	2.43506e-11
16.24	2.36713e-11	2.37155e-11	2.37703e-11	2.36968e-11	2.36428e-11	2.37279e-11	2.43463e-11
16.26	2.3673e-11	2.37139e-11	2.37686e-11	2.36959e-11	2.36384e-11	2.37194e-11	2.43534e-11
16.28	2.36722e-11	2.37173e-11	2.37693e-11	2.36925e-11	2.36338e-11	2.37278e-11	2.43521e-11
16.3	2.36701e-11	2.37199e-11	2.37698e-11	2.36935e-11	2.36331e-11	2.37257e-11	2.43535e-11
16.32	2.36667e-11	2.37169e-11	2.37641e-11	2.36895e-11	2.36319e-11	2.37212e-11	2.43519e-11
16.34	2.36619e-11	2.37215e-11	2.37728e-11	2.36878e-11	2.36361e-11	2.37252e-11	2.43537e-11
16.36	2.36713e-11	2.37198e-11	2.3765e-11	2.36931e-11	2.36299e-11	2.37187e-11	2.43458e-11
16.38	2.36654e-11	2.37181e-11	2.37699e-11	2.36934e-11	2.36289e-11	2.37214e-11	2.43543e-11
16.4	2.36737e-11	2.37269e-11	2.3767e-11	2.36927e-11	2.36295e-11	2.3732e-11	2.43388e-11
16.42	2.36773e-11	2.37247e-11	2.37634e-11	2.36868e-11	2.36276e-11	2.37217e-11	2.43517e-11
16.44	2.36748e-11	2.37216e-11	2.3773e-11	2.36944e-11	2.36301e-11	2.37255e-11	2.43499e-11
16.46	2.36651e-11	2.37187e-11	2.37655e-11	2.36969e-11	2.36245e-11	2.37244e-11	2.43492e-11
16.48	2.36706e-11	2.37174e-11	2.37672e-11	2.36969e-11	2.36258e-11	2.37266e-11	2.43488e-11
16.5	2.36789e-11	2.37219e-11	2.37695e-11	2.36954e-11	2.36264e-11	2.37256e-11	2.43542e-11
16.52	2.36711e-11	2.37178e-11	2.37718e-11	2.36942e-11	2.36318e-11	2.3735e-11	2.43556e-11
16.54	2.36697e-11	2.37212e-11	2.37681e-11	2.36902e-11	2.36259e-11	2.37356e-11	2.43569e-11
16.56	2.3674e-11	2.37247e-11	2.37767e-11	2.36908e-11	2.36221e-11	2.37336e-11	2.43533e-11
16.58	2.36753e-11	2.37212e-11	2.37726e-11	2.3692e-11	2.36209e-11	2.37393e-11	2.43511e-11
16.6	2.36718e-11	2.37234e-11	2.37662e-11	2.36914e-11	2.36287e-11	2.37379e-11	2.43533e-11
16.62	2.36815e-11	2.37199e-11	2.37655e-11	2.36902e-11	2.3622e-11	2.37331e-11	2.43507e-11
[truncated: 6,169 more rows]

## Sheet: 17n02052-069.abf
	Cm(F)
[truncated: 7,602 more rows]

## Sheet: 17n02071-103.abf
	Cm(F)
[truncated: 7,001 more rows]

## Sheet: 17n02105-120.abf
	Cm(F)
[truncated: 7,001 more rows]

## Sheet: 17n02122-154.abf
	Cm(F)
[truncated: 7,001 more rows]

## Sheet: 17n02156-171.abf
	Cm(F)
[truncated: 7,001 more rows]

## Sheet: 17n02173-187.abf
	Cm(F)
[truncated: 7,052 more rows]

[truncated: 1 more sheets: 17n02189-205.abf]
