# Supplementary material for: A label-free approach to detect ligand binding to cell surface proteins in real time
Source: eLife journal article supplement (doi:10.7554/elife.34944), 2018-04-26
Supplement: supp [file Fig5j.xlsx]

## Sheet: 16930044-048.abf
	Cm(F)
time (ms)	100uM 5-HT	100uM cocaine
0.02	1.57385e-11	1.58193e-11
0.04	1.57346e-11	1.58283e-11
0.06	1.57347e-11	1.58355e-11
0.08	1.57354e-11	1.58366e-11
0.1	1.57274e-11	1.58273e-11
0.12	1.57365e-11	1.58274e-11
0.14	1.57298e-11	1.58205e-11
0.16	1.57347e-11	1.58308e-11
0.18	1.57371e-11	1.58203e-11
0.2	1.57334e-11	1.58416e-11
0.22	1.57433e-11	1.58256e-11
0.24	1.57339e-11	1.58274e-11
0.26	1.5741e-11	1.58227e-11
0.28	1.57436e-11	1.58348e-11
0.3	1.57244e-11	1.58401e-11
0.32	1.57232e-11	1.5845e-11
0.34	1.57288e-11	1.58334e-11
0.36	1.57329e-11	1.58332e-11
0.38	1.57309e-11	1.58328e-11
0.4	1.57329e-11	1.58288e-11
0.42	1.57361e-11	1.58339e-11
0.44	1.57281e-11	1.58413e-11
0.46	1.57353e-11	1.58376e-11
0.48	1.57231e-11	1.58323e-11
0.5	1.57211e-11	1.58467e-11
0.52	1.57333e-11	1.58406e-11
0.54	1.57292e-11	1.58398e-11
0.56	1.57259e-11	1.58388e-11
0.58	1.57283e-11	1.58413e-11
0.6	1.57337e-11	1.58455e-11
0.62	1.57175e-11	1.58424e-11
0.64	1.57228e-11	1.58436e-11
0.66	1.57394e-11	1.58442e-11
0.68	1.5736e-11	1.58523e-11
0.7	1.57393e-11	1.58309e-11
0.72	1.57325e-11	1.58517e-11
0.74	1.57223e-11	1.58571e-11
0.76	1.5732e-11	1.58451e-11
0.78	1.57311e-11	1.58484e-11
0.8	1.57374e-11	1.58396e-11
0.82	1.57298e-11	1.58438e-11
0.84	1.57307e-11	1.58393e-11
0.86	1.57337e-11	1.58482e-11
0.88	1.57329e-11	1.58421e-11
0.9	1.57282e-11	1.58408e-11
0.92	1.57316e-11	1.58517e-11
0.94	1.57316e-11	1.58402e-11
0.96	1.57278e-11	1.58284e-11
0.98	1.57285e-11	1.5824e-11
1	1.57305e-11	1.58419e-11
1.02	1.5735e-11	1.58346e-11
1.04	1.57269e-11	1.58325e-11
1.06	1.57327e-11	1.58288e-11
1.08	1.57323e-11	1.58372e-11
1.1	1.5723e-11	1.58322e-11
1.12	1.57282e-11	1.58396e-11
1.14	1.57197e-11	1.58381e-11
1.16	1.572e-11	1.58375e-11
1.18	1.5733e-11	1.58322e-11
1.2	1.574e-11	1.58333e-11
1.22	1.5731e-11	1.58463e-11
1.24	1.57291e-11	1.58341e-11
1.26	1.57247e-11	1.58451e-11
1.28	1.57272e-11	1.58391e-11
1.3	1.57355e-11	1.58365e-11
1.32	1.57214e-11	1.58309e-11
1.34	1.57353e-11	1.58401e-11
1.36	1.57249e-11	1.58371e-11
1.38	1.57361e-11	1.58494e-11
1.4	1.57188e-11	1.58364e-11
1.42	1.5737e-11	1.58441e-11
1.44	1.57358e-11	1.58562e-11
1.46	1.5721e-11	1.58467e-11
1.48	1.57352e-11	1.58441e-11
1.5	1.57276e-11	1.58495e-11
1.52	1.57316e-11	1.58373e-11
1.54	1.57346e-11	1.58321e-11
1.56	1.57307e-11	1.58297e-11
1.58	1.57418e-11	1.58337e-11
1.6	1.57374e-11	1.58327e-11
1.62	1.57296e-11	1.58271e-11
1.64	1.5734e-11	1.58279e-11
1.66	1.57323e-11	1.58387e-11
1.68	1.57263e-11	1.58362e-11
1.7	1.57258e-11	1.58313e-11
1.72	1.57364e-11	1.58372e-11
1.74	1.57325e-11	1.58457e-11
1.76	1.57324e-11	1.58394e-11
1.78	1.57434e-11	1.58386e-11
1.8	1.57309e-11	1.58339e-11
1.82	1.57322e-11	1.5837e-11
1.84	1.57537e-11	1.58353e-11
1.86	1.57414e-11	1.58362e-11
1.88	1.57351e-11	1.58363e-11
1.9	1.57367e-11	1.5841e-11
1.92	1.57332e-11	1.58407e-11
1.94	1.57327e-11	1.5857e-11
1.96	1.57332e-11	1.58408e-11
1.98	1.5735e-11	1.58438e-11
2	1.57352e-11	1.58386e-11
2.02	1.57381e-11	1.58414e-11
2.04	1.5733e-11	1.58408e-11
2.06	1.57479e-11	1.58451e-11
2.08	1.57319e-11	1.58577e-11
2.1	1.57395e-11	1.58552e-11
2.12	1.5746e-11	1.58448e-11
2.14	1.57396e-11	1.58409e-11
2.16	1.5735e-11	1.58447e-11
2.18	1.57545e-11	1.58558e-11
2.2	1.57439e-11	1.58432e-11
2.22	1.5746e-11	1.58425e-11
2.24	1.57572e-11	1.5848e-11
2.26	1.57404e-11	1.58453e-11
2.28	1.57418e-11	1.58383e-11
2.3	1.57413e-11	1.58508e-11
2.32	1.57407e-11	1.58355e-11
2.34	1.57439e-11	1.58539e-11
2.36	1.57347e-11	1.5849e-11
2.38	1.57337e-11	1.58476e-11
2.4	1.57326e-11	1.58395e-11
2.42	1.57381e-11	1.58364e-11
2.44	1.57273e-11	1.58377e-11
2.46	1.57254e-11	1.58387e-11
2.48	1.57234e-11	1.58412e-11
2.5	1.57188e-11	1.58354e-11
2.52	1.57258e-11	1.58423e-11
2.54	1.57249e-11	1.58354e-11
2.56	1.57347e-11	1.58414e-11
2.58	1.57271e-11	1.58384e-11
2.6	1.57157e-11	1.58395e-11
2.62	1.57336e-11	1.58275e-11
2.64	1.57274e-11	1.58291e-11
2.66	1.57267e-11	1.5831e-11
2.68	1.57392e-11	1.58366e-11
2.7	1.5726e-11	1.5828e-11
2.72	1.57387e-11	1.58363e-11
2.74	1.57332e-11	1.58329e-11
2.76	1.57307e-11	1.58339e-11
2.78	1.57246e-11	1.58312e-11
2.8	1.57234e-11	1.58314e-11
2.82	1.57307e-11	1.58362e-11
2.84	1.57376e-11	1.5827e-11
2.86	1.57299e-11	1.58343e-11
2.88	1.57272e-11	1.58292e-11
2.9	1.57342e-11	1.58434e-11
2.92	1.57341e-11	1.58322e-11
2.94	1.57355e-11	1.58319e-11
2.96	1.57299e-11	1.58405e-11
2.98	1.57154e-11	1.58332e-11
3	1.57261e-11	1.58408e-11
3.02	1.57263e-11	1.58411e-11
3.04	1.57288e-11	1.58353e-11
3.06	1.57291e-11	1.58474e-11
3.08	1.57233e-11	1.58224e-11
3.1	1.57272e-11	1.58426e-11
3.12	1.57228e-11	1.58395e-11
3.14	1.57327e-11	1.58448e-11
3.16	1.57322e-11	1.58497e-11
3.18	1.57391e-11	1.58466e-11
3.2	1.57246e-11	1.58441e-11
3.22	1.57223e-11	1.5847e-11
3.24	1.57238e-11	1.58361e-11
3.26	1.57288e-11	1.5849e-11
3.28	1.57324e-11	1.58386e-11
3.3	1.57283e-11	1.58292e-11
3.32	1.57383e-11	1.58361e-11
3.34	1.57356e-11	1.58466e-11
3.36	1.57264e-11	1.58354e-11
3.38	1.57355e-11	1.58457e-11
3.4	1.57362e-11	1.58341e-11
3.42	1.57345e-11	1.5836e-11
3.44	1.57418e-11	1.58383e-11
3.46	1.57418e-11	1.58425e-11
3.48	1.57366e-11	1.58471e-11
3.5	1.57329e-11	1.58322e-11
3.52	1.57348e-11	1.58392e-11
3.54	1.57341e-11	1.58366e-11
3.56	1.57353e-11	1.58382e-11
3.58	1.57312e-11	1.58349e-11
3.6	1.57274e-11	1.58466e-11
3.62	1.57261e-11	1.58319e-11
3.64	1.57269e-11	1.58385e-11
3.66	1.5719e-11	1.58286e-11
3.68	1.57343e-11	1.58329e-11
3.7	1.57269e-11	1.583e-11
3.72	1.572e-11	1.58376e-11
3.74	1.57341e-11	1.58485e-11
3.76	1.57237e-11	1.58433e-11
3.78	1.57165e-11	1.584e-11
3.8	1.57251e-11	1.5833e-11
3.82	1.57274e-11	1.58348e-11
3.84	1.57307e-11	1.58375e-11
3.86	1.57372e-11	1.58448e-11
3.88	1.57242e-11	1.58383e-11
3.9	1.57216e-11	1.58481e-11
3.92	1.57177e-11	1.58408e-11
3.94	1.5727e-11	1.58338e-11
3.96	1.57337e-11	1.58404e-11
3.98	1.57331e-11	1.58338e-11
4	1.57343e-11	1.58385e-11
4.02	1.57302e-11	1.58403e-11
4.04	1.57347e-11	1.58364e-11
4.06	1.57364e-11	1.58391e-11
4.08	1.57277e-11	1.58421e-11
4.1	1.57322e-11	1.58419e-11
4.12	1.5724e-11	1.58459e-11
4.14	1.57276e-11	1.58458e-11
4.16	1.57369e-11	1.58495e-11
4.18	1.57325e-11	1.58561e-11
4.2	1.57243e-11	1.58444e-11
4.22	1.57305e-11	1.58413e-11
4.24	1.57336e-11	1.58408e-11
4.26	1.57223e-11	1.58413e-11
4.28	1.57349e-11	1.58455e-11
4.3	1.57309e-11	1.58495e-11
4.32	1.57345e-11	1.58451e-11
4.34	1.57307e-11	1.58573e-11
4.36	1.57147e-11	1.58482e-11
4.38	1.57236e-11	1.58472e-11
4.4	1.57287e-11	1.58378e-11
4.42	1.57251e-11	1.5844e-11
4.44	1.57369e-11	1.5836e-11
4.46	1.57299e-11	1.58342e-11
4.48	1.57341e-11	1.58368e-11
4.5	1.57309e-11	1.58471e-11
4.52	1.57303e-11	1.58461e-11
4.54	1.57332e-11	1.58426e-11
4.56	1.57337e-11	1.58461e-11
4.58	1.57291e-11	1.5837e-11
4.6	1.57292e-11	1.58451e-11
4.62	1.5733e-11	1.584e-11
4.64	1.57353e-11	1.58355e-11
4.66	1.57357e-11	1.58334e-11
4.68	1.57306e-11	1.58322e-11
4.7	1.57346e-11	1.58379e-11
4.72	1.57373e-11	1.5834e-11
4.74	1.57354e-11	1.58395e-11
4.76	1.57234e-11	1.58367e-11
4.78	1.57318e-11	1.58342e-11
4.8	1.57299e-11	1.58367e-11
4.82	1.57263e-11	1.5841e-11
4.84	1.57296e-11	1.58504e-11
4.86	1.57241e-11	1.58276e-11
4.88	1.57274e-11	1.58407e-11
4.9	1.57253e-11	1.58356e-11
4.92	1.57282e-11	1.58429e-11
4.94	1.57178e-11	1.58302e-11
4.96	1.57198e-11	1.5835e-11
4.98	1.57124e-11	1.58332e-11
5	1.57164e-11	1.58323e-11
5.02	1.57188e-11	1.58353e-11
5.04	1.57149e-11	1.58417e-11
5.06	1.57232e-11	1.58368e-11
5.08	1.57242e-11	1.5823e-11
5.1	1.57249e-11	1.58338e-11
5.12	1.57198e-11	1.58388e-11
5.14	1.57387e-11	1.5846e-11
5.16	1.57378e-11	1.58475e-11
5.18	1.57239e-11	1.58589e-11
5.2	1.57229e-11	1.58448e-11
5.22	1.57324e-11	1.58486e-11
5.24	1.57081e-11	1.58391e-11
5.26	1.57147e-11	1.58438e-11
5.28	1.5715e-11	1.58367e-11
5.3	1.57216e-11	1.58429e-11
5.32	1.57183e-11	1.58513e-11
5.34	1.57235e-11	1.58517e-11
5.36	1.57369e-11	1.58407e-11
5.38	1.57235e-11	1.58435e-11
5.4	1.57217e-11	1.5845e-11
5.42	1.57266e-11	1.58362e-11
5.44	1.57374e-11	1.58446e-11
5.46	1.57292e-11	1.58424e-11
5.48	1.57332e-11	1.58373e-11
5.5	1.5729e-11	1.58364e-11
5.52	1.57347e-11	1.58214e-11
5.54	1.57378e-11	1.58261e-11
5.56	1.57374e-11	1.5825e-11
5.58	1.57441e-11	1.58299e-11
5.6	1.57293e-11	1.5828e-11
5.62	1.57435e-11	1.58461e-11
5.64	1.5739e-11	1.58489e-11
5.66	1.5744e-11	1.58425e-11
5.68	1.57378e-11	1.58432e-11
5.7	1.57326e-11	1.58449e-11
5.72	1.57288e-11	1.5837e-11
5.74	1.57296e-11	1.58493e-11
5.76	1.57365e-11	1.58431e-11
5.78	1.57274e-11	1.5842e-11
5.8	1.57214e-11	1.58573e-11
5.82	1.57297e-11	1.58518e-11
5.84	1.57355e-11	1.58436e-11
5.86	1.57322e-11	1.58452e-11
5.88	1.56504e-11	1.58408e-11
5.9	1.55588e-11	1.58533e-11
5.92	1.55406e-11	1.58448e-11
5.94	1.55427e-11	1.58514e-11
5.96	1.55415e-11	1.58494e-11
5.98	1.55438e-11	1.58537e-11
6	1.55368e-11	1.58497e-11
6.02	1.55434e-11	1.58474e-11
6.04	1.55308e-11	1.58579e-11
6.06	1.55262e-11	1.58525e-11
6.08	1.55452e-11	1.58597e-11
6.1	1.55387e-11	1.58575e-11
6.12	1.55335e-11	1.5858e-11
6.14	1.55213e-11	1.58537e-11
6.16	1.55363e-11	1.58449e-11
6.18	1.55232e-11	1.58373e-11
6.2	1.55243e-11	1.58427e-11
6.22	1.55315e-11	1.58438e-11
6.24	1.55363e-11	1.5836e-11
6.26	1.55352e-11	1.58374e-11
6.28	1.55357e-11	1.5829e-11
6.3	1.55219e-11	1.58447e-11
6.32	1.55223e-11	1.58266e-11
6.34	1.55153e-11	1.58269e-11
6.36	1.55247e-11	1.58333e-11
6.38	1.55326e-11	1.58202e-11
6.4	1.55259e-11	1.58375e-11
6.42	1.55264e-11	1.58151e-11
6.44	1.55222e-11	1.58327e-11
6.46	1.55206e-11	1.583e-11
6.48	1.55279e-11	1.58307e-11
6.5	1.55324e-11	1.58294e-11
6.52	1.55312e-11	1.58391e-11
6.54	1.55177e-11	1.58274e-11
6.56	1.55171e-11	1.58435e-11
6.58	1.55123e-11	1.58303e-11
6.6	1.55059e-11	1.58284e-11
6.62	1.55145e-11	1.58305e-11
6.64	1.55141e-11	1.58393e-11
6.66	1.55048e-11	1.5843e-11
6.68	1.55102e-11	1.5836e-11
6.7	1.55124e-11	1.58383e-11
6.72	1.55214e-11	1.58399e-11
6.74	1.55149e-11	1.58448e-11
6.76	1.55222e-11	1.58365e-11
6.78	1.5517e-11	1.5851e-11
6.8	1.55079e-11	1.58254e-11
6.82	1.55208e-11	1.58363e-11
6.84	1.55113e-11	1.58265e-11
6.86	1.5517e-11	1.58295e-11
6.88	1.55129e-11	1.58337e-11
6.9	1.55131e-11	1.58355e-11
6.92	1.55051e-11	1.58367e-11
6.94	1.55171e-11	1.5835e-11
6.96	1.55197e-11	1.5834e-11
6.98	1.55163e-11	1.58332e-11
7	1.55164e-11	1.58386e-11
7.02	1.55153e-11	1.58325e-11
7.04	1.55133e-11	1.58302e-11
7.06	1.55182e-11	1.58332e-11
7.08	1.55064e-11	1.58371e-11
7.1	1.55193e-11	1.58351e-11
7.12	1.55135e-11	1.58285e-11
7.14	1.55094e-11	1.58273e-11
7.16	1.55126e-11	1.58441e-11
7.18	1.55109e-11	1.58398e-11
7.2	1.5514e-11	1.58416e-11
7.22	1.55131e-11	1.58498e-11
7.24	1.55208e-11	1.58364e-11
7.26	1.55202e-11	1.57267e-11
7.28	1.55178e-11	1.57004e-11
7.3	1.55184e-11	1.56859e-11
7.32	1.55035e-11	1.56688e-11
7.34	1.55144e-11	1.56645e-11
7.36	1.5515e-11	1.56538e-11
7.38	1.55052e-11	1.56589e-11
7.4	1.55075e-11	1.5675e-11
7.42	1.55171e-11	1.56812e-11
7.44	1.55033e-11	1.56774e-11
7.46	1.55091e-11	1.56678e-11
7.48	1.54985e-11	1.56578e-11
7.5	1.55042e-11	1.56784e-11
7.52	1.54999e-11	1.56699e-11
7.54	1.54975e-11	1.56667e-11
7.56	1.55111e-11	1.56551e-11
7.58	1.54995e-11	1.56745e-11
7.6	1.55062e-11	1.56649e-11
7.62	1.54913e-11	1.56634e-11
7.64	1.54993e-11	1.56559e-11
7.66	1.55103e-11	1.56578e-11
7.68	1.55084e-11	1.56626e-11
7.7	1.55016e-11	1.56583e-11
7.72	1.55137e-11	1.56709e-11
7.74	1.55145e-11	1.56634e-11
7.76	1.55061e-11	1.56647e-11
7.78	1.55025e-11	1.56606e-11
7.8	1.55095e-11	1.56639e-11
7.82	1.5503e-11	1.56647e-11
7.84	1.55132e-11	1.56562e-11
7.86	1.55046e-11	1.56593e-11
7.88	1.55063e-11	1.56586e-11
7.9	1.55017e-11	1.56683e-11
7.92	1.55104e-11	1.5668e-11
7.94	1.55178e-11	1.56688e-11
7.96	1.55093e-11	1.56717e-11
7.98	1.55048e-11	1.56626e-11
8	1.55103e-11	1.56622e-11
8.02	1.5505e-11	1.56601e-11
8.04	1.55041e-11	1.56706e-11
8.06	1.54972e-11	1.56636e-11
8.08	1.55011e-11	1.56615e-11
8.1	1.54978e-11	1.56661e-11
8.12	1.55036e-11	1.56602e-11
8.14	1.54966e-11	1.56781e-11
8.16	1.54924e-11	1.56583e-11
8.18	1.54927e-11	1.56666e-11
8.2	1.54939e-11	1.56581e-11
8.22	1.54901e-11	1.56649e-11
8.24	1.5502e-11	1.56527e-11
8.26	1.55003e-11	1.56596e-11
8.28	1.54949e-11	1.56548e-11
8.3	1.55005e-11	1.56493e-11
8.32	1.54931e-11	1.56479e-11
8.34	1.55008e-11	1.56552e-11
8.36	1.54977e-11	1.56605e-11
8.38	1.54999e-11	1.56595e-11
8.4	1.55059e-11	1.56641e-11
8.42	1.55018e-11	1.56614e-11
8.44	1.54969e-11	1.56536e-11
8.46	1.5492e-11	1.56558e-11
8.48	1.54987e-11	1.56535e-11
8.5	1.54988e-11	1.56571e-11
8.52	1.55011e-11	1.56552e-11
8.54	1.55049e-11	1.56584e-11
8.56	1.55061e-11	1.56584e-11
8.58	1.54991e-11	1.56515e-11
8.6	1.55146e-11	1.56532e-11
8.62	1.55073e-11	1.5656e-11
8.64	1.5496e-11	1.56542e-11
8.66	1.54917e-11	1.56596e-11
8.68	1.55022e-11	1.56626e-11
8.7	1.55035e-11	1.56595e-11
8.72	1.54983e-11	1.56551e-11
8.74	1.54869e-11	1.56611e-11
8.76	1.54893e-11	1.56457e-11
8.78	1.55025e-11	1.56586e-11
8.8	1.54925e-11	1.56592e-11
8.82	1.54916e-11	1.56705e-11
8.84	1.54959e-11	1.56609e-11
8.86	1.54975e-11	1.56473e-11
8.88	1.54952e-11	1.56551e-11
8.9	1.54904e-11	1.56619e-11
8.92	1.55013e-11	1.56585e-11
8.94	1.5499e-11	1.56592e-11
8.96	1.54973e-11	1.56649e-11
8.98	1.54918e-11	1.56698e-11
9	1.5499e-11	1.56657e-11
9.02	1.54972e-11	1.5661e-11
9.04	1.55024e-11	1.5664e-11
9.06	1.54895e-11	1.56675e-11
9.08	1.54852e-11	1.56603e-11
9.1	1.54835e-11	1.56686e-11
9.12	1.54826e-11	1.56673e-11
9.14	1.54893e-11	1.56628e-11
9.16	1.5495e-11	1.56609e-11
9.18	1.54842e-11	1.56607e-11
9.2	1.54879e-11	1.56616e-11
9.22	1.54864e-11	1.56635e-11
9.24	1.54831e-11	1.56653e-11
9.26	1.54719e-11	1.56618e-11
9.28	1.54899e-11	1.56753e-11
9.3	1.54922e-11	1.56706e-11
9.32	1.54954e-11	1.56668e-11
9.34	1.54858e-11	1.56635e-11
9.36	1.54951e-11	1.5655e-11
9.38	1.5491e-11	1.56598e-11
9.4	1.54923e-11	1.56615e-11
9.42	1.5494e-11	1.56667e-11
9.44	1.5492e-11	1.56631e-11
9.46	1.54881e-11	1.56599e-11
9.48	1.54926e-11	1.56615e-11
9.5	1.55027e-11	1.56623e-11
9.52	1.54959e-11	1.56677e-11
9.54	1.55059e-11	1.56668e-11
9.56	1.55008e-11	1.56686e-11
9.58	1.54958e-11	1.56597e-11
9.6	1.54988e-11	1.56634e-11
9.62	1.5494e-11	1.5673e-11
9.64	1.55018e-11	1.56722e-11
9.66	1.54959e-11	1.56663e-11
9.68	1.54848e-11	1.56655e-11
9.7	1.54825e-11	1.56513e-11
9.72	1.54922e-11	1.56622e-11
9.74	1.5487e-11	1.56715e-11
9.76	1.54952e-11	1.56635e-11
9.78	1.54904e-11	1.56625e-11
9.8	1.54933e-11	1.56648e-11
9.82	1.54948e-11	1.56689e-11
9.84	1.54919e-11	1.56681e-11
9.86	1.54956e-11	1.56648e-11
9.88	1.54871e-11	1.56673e-11
9.9	1.55006e-11	1.56669e-11
9.92	1.5495e-11	1.56678e-11
9.94	1.5492e-11	1.56649e-11
9.96	1.54959e-11	1.56702e-11
9.98	1.55006e-11	1.56792e-11
10	1.54909e-11	1.56721e-11
10.02	1.54972e-11	1.56676e-11
10.04	1.54912e-11	1.56711e-11
10.06	1.54877e-11	1.56804e-11
10.08	1.54788e-11	1.56872e-11
10.1	1.54761e-11	1.56807e-11
10.12	1.54866e-11	1.5675e-11
10.14	1.54814e-11	1.56751e-11
10.16	1.54816e-11	1.56748e-11
10.18	1.54796e-11	1.56755e-11
10.2	1.54818e-11	1.56577e-11
10.22	1.54817e-11	1.56575e-11
10.24	1.5482e-11	1.56687e-11
10.26	1.54794e-11	1.56575e-11
10.28	1.54653e-11	1.56666e-11
10.3	1.54813e-11	1.56674e-11
10.32	1.54916e-11	1.56601e-11
10.34	1.54875e-11	1.5658e-11
10.36	1.5493e-11	1.5661e-11
10.38	1.54852e-11	1.56583e-11
10.4	1.54827e-11	1.56746e-11
10.42	1.5484e-11	1.56578e-11
10.44	1.5477e-11	1.5669e-11
10.46	1.54754e-11	1.56598e-11
10.48	1.54822e-11	1.56552e-11
10.5	1.54789e-11	1.56609e-11
10.52	1.54848e-11	1.56692e-11
10.54	1.54787e-11	1.56705e-11
10.56	1.54874e-11	1.56728e-11
10.58	1.54824e-11	1.56551e-11
10.6	1.54908e-11	1.56645e-11
10.62	1.54805e-11	1.56579e-11
10.64	1.54925e-11	1.5669e-11
10.66	1.54859e-11	1.56592e-11
10.68	1.54869e-11	1.567e-11
10.7	1.54897e-11	1.56615e-11
10.72	1.54999e-11	1.5684e-11
10.74	1.55005e-11	1.56837e-11
10.76	1.54815e-11	1.56768e-11
10.78	1.55007e-11	1.5669e-11
10.8	1.54816e-11	1.5668e-11
10.82	1.54869e-11	1.5676e-11
10.84	1.54935e-11	1.56767e-11
10.86	1.54925e-11	1.56762e-11
10.88	1.54838e-11	1.56767e-11
10.9	1.54802e-11	1.56616e-11
10.92	1.54945e-11	1.56689e-11
10.94	1.55068e-11	1.56724e-11
10.96	1.55078e-11	1.56636e-11
10.98	1.55059e-11	1.5672e-11
11	1.54974e-11	1.56688e-11
11.02	1.55187e-11	1.56726e-11
11.04	1.55129e-11	1.56793e-11
11.06	1.55202e-11	1.56704e-11
11.08	1.55126e-11	1.56641e-11
11.1	1.55107e-11	1.56798e-11
11.12	1.55107e-11	1.56737e-11
11.14	1.55312e-11	1.56658e-11
11.16	1.55348e-11	1.56849e-11
11.18	1.55198e-11	1.56652e-11
11.2	1.55211e-11	1.5675e-11
11.22	1.55225e-11	1.56686e-11
11.24	1.55319e-11	1.56755e-11
11.26	1.55277e-11	1.56671e-11
11.28	1.55257e-11	1.56643e-11
11.3	1.5529e-11	1.56815e-11
11.32	1.55213e-11	1.56764e-11
11.34	1.55285e-11	1.56692e-11
11.36	1.55286e-11	1.56703e-11
11.38	1.55369e-11	1.56721e-11
11.4	1.5543e-11	1.56659e-11
11.42	1.55463e-11	1.56644e-11
11.44	1.55343e-11	1.56717e-11
11.46	1.55405e-11	1.56764e-11
11.48	1.55431e-11	1.56783e-11
11.5	1.55446e-11	1.56776e-11
11.52	1.5541e-11	1.56721e-11
11.54	1.55494e-11	1.56714e-11
11.56	1.55524e-11	1.56672e-11
11.58	1.5566e-11	1.56665e-11
11.6	1.55612e-11	1.56664e-11
11.62	1.55676e-11	1.56666e-11
11.64	1.55725e-11	1.56745e-11
11.66	1.55666e-11	1.56704e-11
11.68	1.55735e-11	1.56832e-11
11.7	1.55855e-11	1.56605e-11
11.72	1.55773e-11	1.56719e-11
11.74	1.55855e-11	1.56646e-11
11.76	1.5588e-11	1.56775e-11
11.78	1.55811e-11	1.56652e-11
11.8	1.55825e-11	1.56647e-11
11.82	1.5582e-11	1.56856e-11
11.84	1.55912e-11	1.56756e-11
11.86	1.5595e-11	1.56768e-11
11.88	1.55962e-11	1.5681e-11
11.9	1.55807e-11	1.56834e-11
11.92	1.55989e-11	1.56778e-11
11.94	1.56044e-11	1.56719e-11
11.96	1.56036e-11	1.5692e-11
11.98	1.5605e-11	1.56809e-11
12	1.55976e-11	1.56757e-11
12.02	1.55936e-11	1.56758e-11
12.04	1.55987e-11	1.56662e-11
12.06	1.56014e-11	1.56815e-11
12.08	1.5597e-11	1.56729e-11
12.1	1.56055e-11	1.56761e-11
12.12	1.56027e-11	1.56733e-11
12.14	1.5607e-11	1.56921e-11
12.16	1.55995e-11	1.5692e-11
12.18	1.56067e-11	1.56991e-11
12.2	1.56107e-11	1.56905e-11
12.22	1.56124e-11	1.569e-11
12.24	1.56034e-11	1.56772e-11
12.26	1.56128e-11	1.56739e-11
12.28	1.56138e-11	1.56629e-11
12.3	1.56213e-11	1.56587e-11
12.32	1.56192e-11	1.56626e-11
12.34	1.56203e-11	1.56576e-11
12.36	1.56122e-11	1.56495e-11
12.38	1.56178e-11	1.5653e-11
12.4	1.56124e-11	1.56505e-11
12.42	1.56165e-11	1.56545e-11
12.44	1.56225e-11	1.56584e-11
12.46	1.562e-11	1.56518e-11
12.48	1.56269e-11	1.56421e-11
12.5	1.56261e-11	1.56507e-11
12.52	1.56231e-11	1.5647e-11
12.54	1.5626e-11	1.56412e-11
12.56	1.56266e-11	1.5647e-11
12.58	1.56228e-11	1.56389e-11
12.6	1.56336e-11	1.56411e-11
12.62	1.56207e-11	1.56398e-11
12.64	1.56288e-11	1.56309e-11
12.66	1.56335e-11	1.56361e-11
12.68	1.56312e-11	1.56411e-11
12.7	1.5637e-11	1.56366e-11
12.72	1.56326e-11	1.56403e-11
12.74	1.56365e-11	1.5652e-11
12.76	1.56374e-11	1.56365e-11
12.78	1.56409e-11	1.56338e-11
12.8	1.56359e-11	1.56356e-11
12.82	1.56477e-11	1.56289e-11
12.84	1.56421e-11	1.56322e-11
12.86	1.56429e-11	1.56285e-11
12.88	1.56313e-11	1.56282e-11
12.9	1.564e-11	1.56204e-11
12.92	1.56357e-11	1.56274e-11
12.94	1.56378e-11	1.56266e-11
12.96	1.56415e-11	1.56186e-11
12.98	1.56229e-11	1.56217e-11
13	1.56306e-11	1.56162e-11
13.02	1.56431e-11	1.56371e-11
13.04	1.56468e-11	1.56397e-11
13.06	1.56427e-11	1.5626e-11
13.08	1.56447e-11	1.56291e-11
13.1	1.56445e-11	1.56274e-11
13.12	1.56533e-11	1.56222e-11
13.14	1.56398e-11	1.56264e-11
13.16	1.56522e-11	1.56421e-11
13.18	1.56464e-11	1.5625e-11
13.2	1.56467e-11	1.56228e-11
13.22	1.56499e-11	1.56164e-11
13.24	1.56532e-11	1.5624e-11
13.26	1.56498e-11	1.56232e-11
13.28	1.56449e-11	1.56312e-11
13.3	1.56409e-11	1.563e-11
13.32	1.56497e-11	1.5633e-11
13.34	1.56524e-11	1.56364e-11
13.36	1.56504e-11	1.56427e-11
13.38	1.56528e-11	1.56438e-11
13.4	1.56543e-11	1.56479e-11
13.42	1.5651e-11	1.56396e-11
13.44	1.56548e-11	1.56467e-11
13.46	1.56451e-11	1.56532e-11
13.48	1.56555e-11	1.56549e-11
13.5	1.56437e-11	1.56491e-11
13.52	1.56516e-11	1.56415e-11
13.54	1.56387e-11	1.56403e-11
13.56	1.56383e-11	1.56383e-11
13.58	1.56435e-11	1.5643e-11
13.6	1.56558e-11	1.56411e-11
13.62	1.56417e-11	1.56477e-11
13.64	1.56476e-11	1.56466e-11
13.66	1.56549e-11	1.56402e-11
13.68	1.56539e-11	1.56499e-11
13.7	1.5649e-11	1.56403e-11
13.72	1.56708e-11	1.56493e-11
13.74	1.56622e-11	1.56473e-11
13.76	1.56557e-11	1.56437e-11
13.78	1.56688e-11	1.56405e-11
13.8	1.56584e-11	1.56536e-11
13.82	1.56603e-11	1.56473e-11
13.84	1.5655e-11	1.5647e-11
13.86	1.56527e-11	1.56449e-11
13.88	1.56573e-11	1.56508e-11
13.9	1.56597e-11	1.5644e-11
13.92	1.56649e-11	1.56399e-11
13.94	1.56646e-11	1.56524e-11
13.96	1.56632e-11	1.56515e-11
13.98	1.56489e-11	1.56563e-11
14	1.56598e-11	1.5657e-11
14.02	1.56593e-11	1.56676e-11
14.04	1.5663e-11	1.56615e-11
14.06	1.56658e-11	1.56564e-11
14.08	1.56652e-11	1.56538e-11
14.1	1.56647e-11	1.56574e-11
14.12	1.56677e-11	1.56578e-11
14.14	1.5667e-11	1.56641e-11
14.16	1.56692e-11	1.56594e-11
14.18	1.5669e-11	1.56557e-11
14.2	1.56639e-11	1.56576e-11
14.22	1.56625e-11	1.56599e-11
14.24	1.56637e-11	1.56591e-11
14.26	1.5672e-11	1.56507e-11
14.28	1.56691e-11	1.56649e-11
14.3	1.56655e-11	1.5655e-11
14.32	1.5668e-11	1.56588e-11
14.34	1.56629e-11	1.56499e-11
14.36	1.56664e-11	1.56471e-11
14.38	1.56691e-11	1.56609e-11
14.4	1.5683e-11	1.56542e-11
14.42	1.56767e-11	1.5659e-11
14.44	1.56668e-11	1.56633e-11
14.46	1.56755e-11	1.56578e-11
14.48	1.56643e-11	1.56585e-11
14.5	1.56759e-11	1.56583e-11
14.52	1.56792e-11	1.56753e-11
14.54	1.5665e-11	1.56647e-11
14.56	1.56745e-11	1.56588e-11
14.58	1.56799e-11	1.56572e-11
14.6	1.56768e-11	1.567e-11
14.62	1.56776e-11	1.56667e-11
14.64	1.56745e-11	1.56704e-11
14.66	1.56775e-11	1.5671e-11
14.68	1.56711e-11	1.56676e-11
14.7	1.5678e-11	1.56628e-11
14.72	1.56778e-11	1.56664e-11
14.74	1.56712e-11	1.56602e-11
14.76	1.56803e-11	1.56725e-11
14.78	1.56749e-11	1.56701e-11
14.8	1.56785e-11	1.5669e-11
14.82	1.56772e-11	1.56714e-11
14.84	1.56791e-11	1.56781e-11
14.86	1.56756e-11	1.56745e-11
14.88	1.5689e-11	1.56732e-11
14.9	1.56785e-11	1.56714e-11
14.92	1.56765e-11	1.56739e-11
14.94	1.56777e-11	1.56745e-11
14.96	1.56816e-11	1.56748e-11
14.98	1.56799e-11	1.56692e-11
15	1.56817e-11	1.56709e-11
15.02	1.56869e-11	1.56723e-11
15.04	1.56864e-11	1.5669e-11
15.06	1.56847e-11	1.5671e-11
15.08	1.56834e-11	1.56755e-11
15.1	1.56839e-11	1.56753e-11
15.12	1.56926e-11	1.56729e-11
15.14	1.56889e-11	1.56702e-11
15.16	1.56899e-11	1.56742e-11
15.18	1.56901e-11	1.56757e-11
15.2	1.5685e-11	1.56694e-11
15.22	1.56898e-11	1.56781e-11
15.24	1.56919e-11	1.56714e-11
15.26	1.56848e-11	1.56762e-11
15.28	1.56927e-11	1.56736e-11
15.3	1.56861e-11	1.5679e-11
15.32	1.5681e-11	1.56733e-11
15.34	1.56864e-11	1.56809e-11
15.36	1.56881e-11	1.56811e-11
15.38	1.56913e-11	1.56713e-11
15.4	1.56917e-11	1.56735e-11
15.42	1.56761e-11	1.56713e-11
15.44	1.56791e-11	1.56713e-11
15.46	1.56929e-11	1.56838e-11
15.48	1.56808e-11	1.56817e-11
15.5	1.56853e-11	1.56568e-11
15.52	1.56813e-11	1.56634e-11
15.54	1.5688e-11	1.567e-11
15.56	1.56771e-11	1.56714e-11
15.58	1.56853e-11	1.56667e-11
15.6	1.56902e-11	1.56769e-11
15.62	1.56942e-11	1.56727e-11
15.64	1.56862e-11	1.56732e-11
15.66	1.56927e-11	1.5675e-11
15.68	1.56847e-11	1.56705e-11
15.7	1.56887e-11	1.56687e-11
15.72	1.56902e-11	1.56698e-11
15.74	1.569e-11	1.56767e-11
15.76	1.56902e-11	1.56717e-11
15.78	1.56881e-11	1.5678e-11
15.8	1.56975e-11	1.5667e-11
15.82	1.56945e-11	1.56696e-11
15.84	1.56905e-11	1.56748e-11
15.86	1.56963e-11	1.56785e-11
15.88	1.56861e-11	1.56663e-11
15.9	1.5679e-11	1.56673e-11
15.92	1.56925e-11	1.56735e-11
15.94	1.56875e-11	1.56716e-11
15.96	1.56906e-11	1.56762e-11
15.98	1.5693e-11	1.56776e-11
16	1.5692e-11	1.56816e-11
16.02	1.56927e-11	1.56791e-11
16.04	1.56979e-11	1.56784e-11
16.06	1.57001e-11	1.56792e-11
16.08	1.56952e-11	1.56782e-11
16.1	1.57031e-11	1.56743e-11
16.12	1.57055e-11	1.56575e-11
16.14	1.57129e-11	1.56744e-11
16.16	1.57127e-11	1.56906e-11
16.18	1.57146e-11	1.56789e-11
16.2	1.57138e-11	1.56751e-11
16.22	1.57249e-11	1.56844e-11
16.24	1.57076e-11	1.56732e-11
16.26	1.57149e-11	1.56784e-11
16.28	1.57103e-11	1.5666e-11
16.3	1.57081e-11	1.56733e-11
16.32	1.57178e-11	1.56752e-11
16.34	1.57003e-11	1.56694e-11
16.36	1.56981e-11	1.56727e-11
16.38	1.57025e-11	1.56725e-11
16.4	1.57045e-11	1.56748e-11
16.42	1.5704e-11	1.56669e-11
16.44	1.5699e-11	1.5675e-11
16.46	1.5697e-11	1.56708e-11
16.48	1.57117e-11	1.56629e-11
16.5	1.57011e-11	1.56665e-11
16.52	1.56956e-11	1.56646e-11
16.54	1.57066e-11	1.56694e-11
16.56	1.56937e-11	1.56742e-11
16.58	1.57084e-11	1.56731e-11
16.6	1.56985e-11	1.5675e-11
16.62	1.57077e-11	1.5672e-11
16.64	1.56998e-11	1.56698e-11
16.66	1.57051e-11	1.56697e-11
16.68	1.57137e-11	1.56746e-11
16.7	1.57064e-11	1.56787e-11
16.72	1.57005e-11	1.56865e-11
16.74	1.57024e-11	1.56771e-11
16.76	1.56925e-11	1.56895e-11
16.78	1.57027e-11	1.56777e-11
16.8	1.57107e-11	1.56831e-11
16.82	1.57048e-11	1.56719e-11
16.84	1.56954e-11	1.56738e-11
16.86	1.56996e-11	1.56846e-11
16.88	1.57099e-11	1.56905e-11
16.9	1.57125e-11	1.56948e-11
16.92	1.572e-11	1.56909e-11
16.94	1.57139e-11	1.56907e-11
16.96	1.57205e-11	1.56987e-11
16.98	1.57198e-11	1.56861e-11
17	1.57106e-11	1.56906e-11
17.02	1.57105e-11	1.56877e-11
17.04	1.57166e-11	1.5705e-11
17.06	1.57207e-11	1.56942e-11
17.08	1.57211e-11	1.5685e-11
17.1	1.57154e-11	1.56963e-11
17.12	1.57172e-11	1.56859e-11
17.14	1.572e-11	1.56862e-11
17.16	1.57137e-11	1.56972e-11
17.18	1.57257e-11	1.56936e-11
17.2	1.57157e-11	1.56902e-11
17.22	1.57244e-11	1.56939e-11
17.24	1.57142e-11	1.56878e-11
17.26	1.57141e-11	1.56908e-11
17.28	1.57215e-11	1.5704e-11
17.3	1.57159e-11	1.56898e-11
17.32	1.57198e-11	1.56923e-11
17.34	1.57206e-11	1.56902e-11
17.36	1.57186e-11	1.56919e-11
17.38	1.57207e-11	1.57015e-11
17.4	1.57246e-11	1.57087e-11
17.42	1.57214e-11	1.57064e-11
17.44	1.57259e-11	1.57073e-11
17.46	1.57277e-11	1.57141e-11
17.48	1.57253e-11	1.5698e-11
17.5	1.57207e-11	1.57005e-11
17.52	1.57034e-11	1.57022e-11
17.54	1.57077e-11	1.56953e-11
17.56	1.5704e-11	1.56989e-11
17.58	1.57157e-11	1.56982e-11
17.6	1.57178e-11	1.57013e-11
17.62	1.57119e-11	1.57007e-11
17.64	1.571e-11	1.57059e-11
17.66	1.57096e-11	1.57101e-11
17.68	1.5714e-11	1.5702e-11
17.7	1.57191e-11	1.57085e-11
17.72	1.57239e-11	1.56967e-11
17.74	1.57122e-11	1.57091e-11
17.76	1.57155e-11	1.57047e-11
17.78	1.57131e-11	1.57092e-11
17.8	1.57099e-11	1.57093e-11
17.82	1.57182e-11	1.57223e-11
17.84	1.57221e-11	1.5705e-11
17.86	1.57156e-11	1.57144e-11
17.88	1.57091e-11	1.57072e-11
17.9	1.57096e-11	1.57062e-11
17.92	1.56994e-11	1.57139e-11
17.94	1.56938e-11	1.57112e-11
17.96	1.56986e-11	1.57064e-11
17.98	1.57091e-11	1.57192e-11
18	1.57089e-11	1.57188e-11
18.02	1.57e-11	1.5708e-11
18.04	1.56956e-11	1.5709e-11
18.06	1.57055e-11	1.57059e-11
18.08	1.57054e-11	1.5706e-11
18.1	1.5711e-11	1.57157e-11
18.12	1.57027e-11	1.57214e-11
18.14	1.56989e-11	1.57087e-11
18.16	1.56975e-11	1.57094e-11
18.18	1.57049e-11	1.57125e-11
18.2	1.57093e-11	1.57107e-11
18.22	1.57109e-11	1.57176e-11
18.24	1.57167e-11	1.57182e-11
18.26	1.5719e-11	1.57152e-11
18.28	1.57144e-11	1.57107e-11
18.3	1.57234e-11	1.57127e-11
18.32	1.5714e-11	1.57112e-11
18.34	1.57208e-11	1.5715e-11
18.36	1.57142e-11	1.57168e-11
18.38	1.57195e-11	1.57106e-11
18.4	1.5719e-11	1.57114e-11
18.42	1.5726e-11	1.57121e-11
18.44	1.57294e-11	1.57207e-11
18.46	1.57292e-11	1.57112e-11
18.48	1.57074e-11	1.57208e-11
18.5	1.57143e-11	1.5708e-11
18.52	1.57119e-11	1.57112e-11
18.54	1.5719e-11	1.57017e-11
18.56	1.57081e-11	1.57003e-11
18.58	1.57138e-11	1.57133e-11
18.6	1.57188e-11	1.57172e-11
18.62	1.57091e-11	1.57187e-11
18.64	1.5709e-11	1.57109e-11
18.66	1.57177e-11	1.57101e-11
18.68	1.5729e-11	1.57166e-11
18.7	1.57257e-11	1.57124e-11
18.72	1.57216e-11	1.5723e-11
18.74	1.57295e-11	1.57179e-11
18.76	1.57211e-11	1.57127e-11
18.78	1.57243e-11	1.57154e-11
18.8	1.57169e-11	1.57215e-11
18.82	1.57219e-11	1.57273e-11
18.84	1.5723e-11	1.5722e-11
18.86	1.57239e-11	1.57184e-11
18.88	1.5714e-11	1.57279e-11
18.9	1.57191e-11	1.57143e-11
18.92	1.57307e-11	1.57178e-11
18.94	1.57242e-11	1.57222e-11
18.96	1.57185e-11	1.57249e-11
18.98	1.57154e-11	1.57202e-11
19	1.57219e-11	1.57242e-11
19.02	1.57228e-11	1.57206e-11
19.04	1.57136e-11	1.57137e-11
19.06	1.57169e-11	1.572e-11
19.08	1.57163e-11	1.57318e-11
19.1	1.57157e-11	1.5731e-11
19.12	1.57237e-11	1.57215e-11
19.14	1.57203e-11	1.57294e-11
19.16	1.57209e-11	1.57224e-11
19.18	1.57182e-11	1.57367e-11
19.2	1.57291e-11	1.57279e-11
19.22	1.5716e-11	1.57402e-11
19.24	1.57191e-11	1.57261e-11
19.26	1.57167e-11	1.57274e-11
19.28	1.57219e-11	1.57247e-11
19.3	1.57216e-11	1.57283e-11
19.32	1.57145e-11	1.57177e-11
19.34	1.5722e-11	1.5726e-11
19.36	1.57203e-11	1.5724e-11
19.38	1.57199e-11	1.57191e-11
19.4	1.57208e-11	1.57259e-11
19.42	1.57229e-11	1.57171e-11
19.44	1.57135e-11	1.57164e-11
19.46	1.57161e-11	1.57358e-11
19.48	1.57182e-11	1.57348e-11
19.5	1.57226e-11	1.57292e-11
19.52	1.57159e-11	1.57339e-11
19.54	1.57165e-11	1.57412e-11
19.56	1.57291e-11	1.57241e-11
19.58	1.57237e-11	1.57258e-11
19.6	1.57335e-11	1.57352e-11
19.62	1.57193e-11	1.57369e-11
19.64	1.57264e-11	1.5741e-11
19.66	1.57283e-11	1.57329e-11
19.68	1.57195e-11	1.57413e-11
19.7	1.57255e-11	1.57389e-11
19.72	1.57197e-11	1.57358e-11
19.74	1.57166e-11	1.57453e-11
19.76	1.57267e-11	1.57444e-11
19.78	1.57056e-11	1.57378e-11
19.8	1.57124e-11	1.57405e-11
19.82	1.5711e-11	1.57339e-11
19.84	1.5715e-11	1.57442e-11
19.86	1.57115e-11	1.57405e-11
19.88	1.57194e-11	1.57403e-11
19.9	1.57155e-11	1.57371e-11
19.92	1.57103e-11	1.57425e-11
19.94	1.571e-11	1.57365e-11
19.96	1.57129e-11	1.57444e-11
19.98	1.5702e-11	1.57462e-11
20	1.57148e-11	1.5741e-11
20.02	1.57167e-11	1.57348e-11
20.04	1.57159e-11	1.57369e-11
20.06	1.57098e-11	1.57438e-11
20.08	1.5706e-11	1.57493e-11
20.1	1.57103e-11	1.57508e-11
20.12	1.57146e-11	1.57387e-11
20.14	1.57166e-11	1.57447e-11
20.16	1.57111e-11	1.57509e-11
20.18	1.57126e-11	1.57573e-11
20.2	1.57109e-11	1.57438e-11
20.22	1.57088e-11	1.57551e-11
20.24	1.57163e-11	1.57485e-11
20.26	1.57129e-11	1.5751e-11
20.28	1.57087e-11	1.57405e-11
20.3	1.57169e-11	1.57475e-11
20.32	1.57134e-11	1.5759e-11
20.34	1.57164e-11	1.57472e-11
20.36	1.57067e-11	1.57526e-11
20.38	1.57172e-11	1.57528e-11
20.4	1.57172e-11	1.57483e-11
20.42	1.57153e-11	1.57448e-11
20.44	1.57184e-11	1.57519e-11
20.46	1.57064e-11	1.57456e-11
20.48	1.5713e-11	1.5754e-11
20.5	1.57159e-11	1.57446e-11
20.52	1.57208e-11	1.57356e-11
20.54	1.57067e-11	1.57496e-11
20.56	1.57142e-11	1.5751e-11
20.58	1.57092e-11	1.57467e-11
20.6	1.57153e-11	1.57513e-11
20.62	1.5719e-11	1.57489e-11
20.64	1.57074e-11	1.57456e-11
20.66	1.57094e-11	1.57475e-11
20.68	1.57068e-11	1.57444e-11
20.7	1.57204e-11	1.57411e-11
20.72	1.57098e-11	1.57429e-11
20.74	1.57163e-11	1.57389e-11
20.76	1.57169e-11	1.57396e-11
20.78	1.57157e-11	1.57548e-11
20.8	1.57142e-11	1.57397e-11
20.82	1.57112e-11	1.57534e-11
20.84	1.57057e-11	1.57521e-11
20.86	1.57121e-11	1.57399e-11
20.88	1.57235e-11	1.57404e-11
20.9	1.57149e-11	1.57337e-11
20.92	1.57085e-11	1.57417e-11
20.94	1.57102e-11	1.57495e-11
20.96	1.57083e-11	1.57423e-11
20.98	1.57086e-11	1.57559e-11
21	1.57169e-11	1.57533e-11
21.02	1.57159e-11	1.57361e-11
21.04	1.57185e-11	1.57506e-11
21.06	1.57108e-11	1.57334e-11
21.08	1.57075e-11	1.575e-11
21.1	1.57097e-11	1.57387e-11
21.12	1.57113e-11	1.57446e-11
21.14	1.57133e-11	1.57477e-11
21.16	1.5713e-11	1.57353e-11
21.18	1.57191e-11	1.57339e-11
21.2	1.57082e-11	1.57274e-11
21.22	1.5705e-11	1.57312e-11
21.24	1.57168e-11	1.57314e-11
21.26	1.57109e-11	1.57456e-11
21.28	1.57229e-11	1.57397e-11
21.3	1.57195e-11	1.57499e-11
21.32	1.57145e-11	1.57354e-11
21.34	1.57158e-11	1.57395e-11
21.36	1.57222e-11	1.57381e-11
21.38	1.57221e-11	1.57306e-11
21.4	1.57147e-11	1.57389e-11
21.42	1.57197e-11	1.57307e-11
21.44	1.57329e-11	1.57395e-11
21.46	1.571e-11	1.5731e-11
21.48	1.57143e-11	1.57343e-11
21.5	1.57173e-11	1.57349e-11
21.52	1.572e-11	1.57425e-11
21.54	1.57222e-11	1.57387e-11
21.56	1.57225e-11	1.5745e-11
21.58	1.57158e-11	1.57347e-11
21.6	1.57126e-11	1.57392e-11
21.62	1.5717e-11	1.5741e-11
21.64	1.57134e-11	1.57392e-11
21.66	1.57277e-11	1.57443e-11
21.68	1.5718e-11	1.5737e-11
21.7	1.5725e-11	1.57363e-11
21.72	1.57123e-11	1.57364e-11
21.74	1.57101e-11	1.57326e-11
21.76	1.57193e-11	1.57384e-11
21.78	1.57195e-11	1.57401e-11
21.8	1.57217e-11	1.57409e-11
21.82	1.57227e-11	1.5742e-11
21.84	1.5711e-11	1.57487e-11
21.86	1.57214e-11	1.57501e-11
21.88	1.57188e-11	1.57502e-11
21.9	1.57176e-11	1.57444e-11
21.92	1.57177e-11	1.57434e-11
21.94	1.57191e-11	1.57503e-11
21.96	1.57238e-11	1.57467e-11
21.98	1.57194e-11	1.57478e-11
22	1.57222e-11	1.57438e-11
22.02	1.57141e-11	1.57388e-11
22.04	1.57116e-11	1.5745e-11
22.06	1.57146e-11	1.57474e-11
22.08	1.57185e-11	1.57477e-11
22.1	1.57191e-11	1.57422e-11
22.12	1.57247e-11	1.57396e-11
22.14	1.57267e-11	1.57456e-11
22.16	1.57208e-11	1.57466e-11
22.18	1.57255e-11	1.57565e-11
22.2	1.57191e-11	1.57521e-11
22.22	1.57107e-11	1.57452e-11
22.24	1.57297e-11	1.57552e-11
22.26	1.57268e-11	1.57596e-11
22.28	1.57268e-11	1.57488e-11
22.3	1.57256e-11	1.57564e-11
22.32	1.57159e-11	1.57617e-11
22.34	1.57235e-11	1.57689e-11
22.36	1.57222e-11	1.576e-11
22.38	1.57287e-11	1.57629e-11
22.4	1.57197e-11	1.57571e-11
22.42	1.57273e-11	1.57544e-11
22.44	1.57202e-11	1.57585e-11
22.46	1.57135e-11	1.57534e-11
22.48	1.57206e-11	1.57542e-11
22.5	1.57255e-11	1.57473e-11
22.52	1.57208e-11	1.57372e-11
22.54	1.572e-11	1.57476e-11
22.56	1.57127e-11	1.57432e-11
22.58	1.57257e-11	1.57435e-11
22.6	1.57235e-11	1.57435e-11
22.62	1.57242e-11	1.57392e-11
22.64	1.57278e-11	1.57353e-11
22.66	1.57313e-11	1.57513e-11
22.68	1.57307e-11	1.57557e-11
22.7	1.57309e-11	1.57463e-11
22.72	1.57374e-11	1.5748e-11
22.74	1.57278e-11	1.5745e-11
22.76	1.57392e-11	1.57472e-11
22.78	1.57252e-11	1.57493e-11
22.8	1.57251e-11	1.57428e-11
22.82	1.57328e-11	1.57513e-11
22.84	1.57264e-11	1.57511e-11
22.86	1.57263e-11	1.57336e-11
22.88	1.57312e-11	1.57441e-11
22.9	1.57351e-11	1.57483e-11
22.92	1.57406e-11	1.5737e-11
22.94	1.57322e-11	1.57491e-11
22.96	1.57345e-11	1.57521e-11
22.98	1.57271e-11	1.57601e-11
23	1.57265e-11	1.57473e-11
23.02	1.57316e-11	1.57454e-11
23.04	1.57431e-11	1.57486e-11
23.06	1.57235e-11	1.57453e-11
23.08	1.57238e-11	1.57468e-11
23.1	1.57229e-11	1.57448e-11
23.12	1.57295e-11	1.5754e-11
23.14	1.57309e-11	1.57432e-11
23.16	1.57273e-11	1.57544e-11
23.18	1.57319e-11	1.57505e-11
23.2	1.57451e-11	1.57506e-11
23.22	1.57422e-11	1.57439e-11
23.24	1.57314e-11	1.57544e-11
23.26	1.57388e-11	1.57529e-11
23.28	1.57458e-11	1.5742e-11
23.3	1.57376e-11	1.57438e-11
23.32	1.57412e-11	1.57416e-11
23.34	1.57377e-11	1.57531e-11
23.36	1.57296e-11	1.57509e-11
23.38	1.57437e-11	1.57401e-11
23.4	1.57414e-11	1.57454e-11
23.42	1.57366e-11	1.57433e-11
23.44	1.57323e-11	1.57467e-11
23.46	1.57316e-11	1.57442e-11
23.48	1.57317e-11	1.57397e-11
23.5	1.57339e-11	1.57491e-11
23.52	1.57361e-11	1.57513e-11
23.54	1.574e-11	1.57457e-11
23.56	1.57434e-11	1.57504e-11
23.58	1.57394e-11	1.575e-11
23.6	1.57318e-11	1.57446e-11
23.62	1.57261e-11	1.57505e-11
23.64	1.57341e-11	1.57446e-11
23.66	1.57316e-11	1.57529e-11
23.68	1.57357e-11	1.5739e-11
23.7	1.57311e-11	1.57411e-11
23.72	1.57276e-11	1.57479e-11
23.74	1.57225e-11	1.57427e-11
23.76	1.57192e-11	1.57473e-11
23.78	1.57279e-11	1.57505e-11
23.8	1.57205e-11	1.57499e-11
23.82	1.57221e-11	1.57514e-11
23.84	1.57335e-11	1.57544e-11
23.86	1.57232e-11	1.57449e-11
23.88	1.57204e-11	1.57534e-11
23.9	1.5737e-11	1.57441e-11
23.92	1.57245e-11	1.57494e-11
23.94	1.57327e-11	1.57538e-11
23.96	1.57244e-11	1.57499e-11
23.98	1.57289e-11	1.57485e-11
24	1.5726e-11	1.57485e-11
24.02	1.57171e-11	1.57508e-11
24.04	1.57233e-11	1.57509e-11
24.06	1.572e-11	1.57521e-11
24.08	1.57403e-11	1.57534e-11
24.1	1.57209e-11	1.5753e-11
24.12	1.57296e-11	1.5753e-11
24.14	1.57272e-11	1.57514e-11
24.16	1.57206e-11	1.57565e-11
24.18	1.57113e-11	1.57629e-11
24.2	1.57294e-11	1.57586e-11
24.22	1.57259e-11	1.57588e-11
24.24	1.57267e-11	1.57606e-11
24.26	1.57313e-11	1.57498e-11
24.28	1.57265e-11	1.57614e-11
24.3	1.57212e-11	1.57538e-11
24.32	1.57294e-11	1.57647e-11
24.34	1.5719e-11	1.57581e-11
24.36	1.57244e-11	1.57692e-11
24.38	1.57173e-11	1.57615e-11
24.4	1.57304e-11	1.57683e-11
24.42	1.57229e-11	1.57581e-11
24.44	1.57289e-11	1.57711e-11
24.46	1.57241e-11	1.57574e-11
24.48	1.57282e-11	1.57619e-11
24.5	1.57106e-11	1.57618e-11
24.52	1.57226e-11	1.57739e-11
24.54	1.57314e-11	1.57642e-11
24.56	1.57296e-11	1.57629e-11
24.58	1.57233e-11	1.57624e-11
24.6	1.57249e-11	1.57682e-11
24.62	1.57223e-11	1.57638e-11
24.64	1.57243e-11	1.57649e-11
24.66	1.5724e-11	1.57657e-11
24.68	1.57269e-11	1.57616e-11
24.7	1.57197e-11	1.57491e-11
24.72	1.57149e-11	1.57673e-11
24.74	1.57271e-11	1.57572e-11
24.76	1.57266e-11	1.57601e-11
24.78	1.57183e-11	1.57607e-11
24.8	1.57348e-11	1.57666e-11
24.82	1.5724e-11	1.5762e-11
24.84	1.57215e-11	1.5758e-11
24.86	1.57258e-11	1.57621e-11
24.88	1.57226e-11	1.57598e-11
24.9	1.57254e-11	1.57555e-11
24.92	1.57284e-11	1.57535e-11
24.94	1.57348e-11	1.57604e-11
24.96	1.5732e-11	1.57623e-11
24.98	1.5732e-11	1.57601e-11
25	1.57225e-11	1.57623e-11
25.02	1.57287e-11	1.57648e-11
25.04	1.5731e-11	1.57643e-11
25.06	1.57286e-11	1.57618e-11
25.08	1.57234e-11	1.5761e-11
25.1	1.57201e-11	1.57713e-11
25.12	1.57219e-11	1.57674e-11
25.14	1.57305e-11	1.57723e-11
25.16	1.57145e-11	1.57644e-11
25.18	1.57209e-11	1.57635e-11
25.2	1.57237e-11	1.57701e-11
25.22	1.57312e-11	1.57629e-11
25.24	1.57208e-11	1.57697e-11
25.26	1.57233e-11	1.57726e-11
25.28	1.57171e-11	1.57719e-11
25.3	1.57199e-11	1.57798e-11
25.32	1.57298e-11	1.57688e-11
25.34	1.57263e-11	1.57761e-11
25.36	1.57239e-11	1.57745e-11
25.38	1.57209e-11	1.57747e-11
25.4	1.57193e-11	1.57748e-11
25.42	1.57138e-11	1.57704e-11
25.44	1.57243e-11	1.57714e-11
25.46	1.57291e-11	1.57769e-11
25.48	1.57196e-11	1.57829e-11
25.5	1.57237e-11	1.57785e-11
25.52	1.57298e-11	1.57864e-11
25.54	1.5726e-11	1.57717e-11
25.56	1.57307e-11	1.57775e-11
25.58	1.57227e-11	1.57807e-11
25.6	1.57209e-11	1.57784e-11
25.62	1.57229e-11	1.57881e-11
25.64	1.57366e-11	1.57908e-11
25.66	1.57302e-11	1.57853e-11
25.68	1.57257e-11	1.57755e-11
25.7	1.57324e-11	1.57794e-11
25.72	1.57293e-11	1.57869e-11
25.74	1.57272e-11	1.57788e-11
25.76	1.57268e-11	1.57682e-11
25.78	1.57204e-11	1.57773e-11
25.8	1.57226e-11	1.57838e-11
25.82	1.57091e-11	1.57727e-11
25.84	1.57271e-11	1.5778e-11
25.86	1.57266e-11	1.57732e-11
25.88	1.57271e-11	1.57798e-11
25.9	1.5723e-11	1.57767e-11
25.92	1.57347e-11	1.57878e-11
25.94	1.57356e-11	1.57886e-11
25.96	1.57264e-11	1.57887e-11
25.98	1.57288e-11	1.57995e-11
26	1.5723e-11	1.57928e-11
26.02	1.57208e-11	1.57803e-11
26.04	1.57247e-11	1.5778e-11
26.06	1.57197e-11	1.57777e-11
26.08	1.57199e-11	1.57852e-11
26.1	1.57222e-11	1.57765e-11
26.12	1.57283e-11	1.57882e-11
26.14	1.5727e-11	1.57758e-11
26.16	1.57252e-11	1.57845e-11
26.18	1.57204e-11	1.57737e-11
26.2	1.57262e-11	1.57849e-11
26.22	1.57276e-11	1.57813e-11
26.24	1.57291e-11	1.5776e-11
26.26	1.57358e-11	1.57821e-11
26.28	1.57314e-11	1.57827e-11
26.3	1.57275e-11	1.57907e-11
26.32	1.57276e-11	1.57841e-11
26.34	1.57254e-11	1.57857e-11
26.36	1.57221e-11	1.57837e-11
26.38	1.57226e-11	1.57872e-11
26.4	1.57235e-11	1.57828e-11
26.42	1.57151e-11	1.57887e-11
26.44	1.57293e-11	1.57791e-11
26.46	1.5728e-11	1.57913e-11
26.48	1.572e-11	1.57864e-11
26.5	1.57282e-11	1.57892e-11
26.52	1.57274e-11	1.57801e-11
26.54	1.57284e-11	1.57854e-11
26.56	1.57341e-11	1.57853e-11
26.58	1.57408e-11	1.57948e-11
26.6	1.57334e-11	1.57874e-11
26.62	1.5738e-11	1.58093e-11
26.64	1.57436e-11	1.57935e-11
26.66	1.57396e-11	1.57947e-11
26.68	1.57362e-11	1.57831e-11
26.7	1.57345e-11	1.57919e-11
26.72	1.57362e-11	1.57873e-11
26.74	1.57388e-11	1.57955e-11
26.76	1.57368e-11	1.57969e-11
26.78	1.57374e-11	1.57884e-11
26.8	1.57389e-11	1.57999e-11
26.82	1.57261e-11	1.57879e-11
26.84	1.5734e-11	1.57966e-11
26.86	1.57305e-11	1.5803e-11
26.88	1.57344e-11	1.57944e-11
26.9	1.57311e-11	1.58032e-11
26.92	1.57361e-11	1.57982e-11
26.94	1.57253e-11	1.58172e-11
26.96	1.57319e-11	1.5793e-11
26.98	1.57298e-11	1.57883e-11
27	1.57351e-11	1.57902e-11
27.02	1.57385e-11	1.57836e-11
27.04		1.57852e-11
27.06		1.57847e-11
27.08		1.5789e-11
27.1		1.57991e-11
27.12		1.57908e-11
27.14		1.57856e-11
27.16		1.57963e-11
27.18		1.57956e-11
27.2		1.57841e-11
27.22		1.58048e-11
27.24		1.57976e-11
27.26		1.57973e-11
27.28		1.57906e-11
27.3		1.57889e-11
27.32		1.57929e-11
27.34		1.5795e-11
27.36		1.57812e-11
27.38		1.57908e-11
27.4		1.58001e-11
27.42		1.57925e-11
27.44		1.58031e-11
27.46		1.58026e-11
27.48		1.57963e-11
27.5		1.57985e-11
27.52		1.57943e-11
27.54		1.57989e-11
27.56		1.5796e-11
27.58		1.5798e-11
27.6		1.57854e-11
27.62		1.57811e-11
27.64		1.57927e-11
27.66		1.57936e-11
27.68		1.57891e-11
27.7		1.57945e-11
27.72		1.57953e-11
27.74		1.57932e-11
27.76		1.58075e-11
27.78		1.57966e-11
27.8		1.57964e-11
27.82		1.58051e-11
27.84		1.57961e-11
27.86		1.57946e-11
27.88		1.58059e-11
27.9		1.57944e-11
27.92		1.58025e-11
27.94		1.58018e-11
27.96		1.58036e-11
27.98		1.58041e-11
28		1.58024e-11
28.02		1.57987e-11
28.04		1.58087e-11
28.06		1.58016e-11
28.08		1.58099e-11
28.1		1.57945e-11
28.12		1.58075e-11
28.14		1.58022e-11
28.16		1.58068e-11
28.18		1.58e-11
28.2		1.57955e-11
28.22		1.57982e-11
28.24		1.58058e-11
28.26		1.58135e-11
28.28		1.58146e-11
28.3		1.58113e-11
28.32		1.58048e-11
28.34		1.58096e-11
28.36		1.58061e-11
28.38		1.5817e-11
28.4		1.5816e-11
28.42		1.58157e-11
28.44		1.58189e-11
28.46		1.58279e-11
28.48		1.58103e-11
28.5		1.58258e-11
28.52		1.58193e-11
28.54		1.58182e-11
28.56		1.58204e-11
28.58		1.58165e-11
28.6		1.58263e-11
28.62		1.58123e-11
28.64		1.58154e-11
28.66		1.58164e-11
28.68		1.58115e-11
28.7		1.58218e-11
28.72		1.58031e-11
28.74		1.58134e-11
28.76		1.58091e-11
28.78		1.58055e-11
28.8		1.58098e-11
28.82		1.58013e-11
28.84		1.58107e-11
28.86		1.58136e-11
28.88		1.58131e-11
28.9		1.58196e-11
28.92		1.5824e-11
28.94		1.58216e-11
28.96		1.5821e-11
28.98		1.5819e-11
29		1.5828e-11
29.02		1.58261e-11
29.04		1.58251e-11
29.06		1.58248e-11
29.08		1.58106e-11
29.1		1.58141e-11
29.12		1.58264e-11
29.14		1.58316e-11
29.16		1.58131e-11
29.18		1.58283e-11
29.2		1.58271e-11
29.22		1.58259e-11
29.24		1.5823e-11
29.26		1.5828e-11
29.28		1.58248e-11
29.3		1.58217e-11
29.32		1.58179e-11
29.34		1.58173e-11
29.36		1.58153e-11
29.38		1.5815e-11
29.4		1.58263e-11
29.42		1.58259e-11
29.44		1.58229e-11
29.46		1.58196e-11
29.48		1.58221e-11
29.5		1.58097e-11
29.52		1.5814e-11
29.54		1.58252e-11
29.56		1.58208e-11
29.58		1.58119e-11
29.6		1.58284e-11
29.62		1.58329e-11
29.64		1.58241e-11
29.66		1.58267e-11
29.68		1.58239e-11
29.7		1.58224e-11
29.72		1.58214e-11
29.74		1.5824e-11
29.76		1.58104e-11
29.78		1.582e-11
29.8		1.58132e-11
29.82		1.58204e-11
29.84		1.58104e-11
29.86		1.58159e-11
29.88		1.58227e-11
29.9		1.58227e-11
29.92		1.58267e-11
29.94		1.58307e-11
29.96		1.58271e-11
29.98		1.58273e-11
30		1.58275e-11
30.02		1.58193e-11
30.04		1.58233e-11
30.06		1.58278e-11
30.08		1.58293e-11
30.1		1.58154e-11
30.12		1.58176e-11
30.14		1.58176e-11
30.16		1.58263e-11
30.18		1.58262e-11
30.2		1.58272e-11
30.22		1.58223e-11
30.24		1.58219e-11
30.26		1.58278e-11
30.28		1.58222e-11
30.3		1.58249e-11
30.32		1.58325e-11
30.34		1.58274e-11
30.36		1.5827e-11
30.38		1.5816e-11
30.4		1.58172e-11
30.42		1.58099e-11
30.44		1.58093e-11
30.46		1.5813e-11
30.48		1.58151e-11
30.5		1.58172e-11
30.52		1.58055e-11
30.54		1.58111e-11
30.56		1.58081e-11
30.58		1.58122e-11
30.6		1.58052e-11
30.62		1.5819e-11
30.64		1.5822e-11
30.66		1.58161e-11
30.68		1.58261e-11
30.7		1.58286e-11
30.72		1.58181e-11
30.74		1.58259e-11
30.76		1.58137e-11
30.78		1.58228e-11
30.8		1.58273e-11
30.82		1.58233e-11
30.84		1.58086e-11
30.86		1.58103e-11
30.88		1.58148e-11
30.9		1.58207e-11
30.92		1.58215e-11
30.94		1.58172e-11
30.96		1.58298e-11
30.98		1.58186e-11
31		1.5822e-11
31.02		1.58025e-11
31.04		1.58145e-11
31.06		1.58178e-11
31.08		1.58116e-11
31.1		1.58077e-11
31.12		1.58221e-11
31.14		1.58144e-11
31.16		1.58136e-11
31.18		1.58089e-11
31.2		1.58273e-11
31.22		1.58166e-11
31.24		1.58168e-11
31.26		1.58178e-11
31.28		1.58115e-11
31.3		1.58183e-11
31.32		1.58243e-11
31.34		1.58205e-11
31.36		1.58262e-11
31.38		1.58304e-11
31.4		1.582e-11
31.42		1.58303e-11
31.44		1.58311e-11
31.46		1.58303e-11
31.48		1.58353e-11
31.5		1.58295e-11
31.52		1.58295e-11
31.54		1.58265e-11
31.56		1.58103e-11
31.58		1.58325e-11
31.6		1.58105e-11
31.62		1.58246e-11
31.64		1.58113e-11
31.66		1.58279e-11
31.68		1.58197e-11
31.7		1.58257e-11
31.72		1.58231e-11
31.74		1.58127e-11
31.76		1.58162e-11
31.78		1.58311e-11
31.8		1.58215e-11
31.82		1.58259e-11
31.84		1.58165e-11
31.86		1.58238e-11
31.88		1.58172e-11
31.9		1.58329e-11
31.92		1.58105e-11
31.94		1.58207e-11
31.96		1.58116e-11
31.98		1.58147e-11
32		1.58197e-11
32.02		1.58088e-11
32.04		1.58255e-11
32.06		1.58283e-11
32.08		1.58177e-11
32.1		1.58327e-11
32.12		1.58278e-11
32.14		1.58212e-11
32.16		1.5828e-11
32.18		1.58254e-11
32.2		1.58175e-11
32.22		1.58251e-11
32.24		1.58232e-11
32.26		1.58075e-11
32.28		1.58205e-11
32.3		1.58307e-11
32.32		1.58302e-11
32.34		1.58231e-11
32.36		1.58221e-11
32.38		1.58283e-11
32.4		1.58257e-11
32.42		1.58259e-11
32.44		1.58187e-11
32.46		1.583e-11
32.48		1.58249e-11
32.5		1.58254e-11
32.52		1.58381e-11
32.54		1.58284e-11
32.56		1.58275e-11
32.58		1.58266e-11
32.6		1.58256e-11
32.62		1.58275e-11
32.64		1.58301e-11
32.66		1.58326e-11
32.68		1.58286e-11
32.7		1.58368e-11
32.72		1.58247e-11
32.74		1.5818e-11
32.76		1.58236e-11
32.78		1.58154e-11
32.8		1.58334e-11
32.82		1.58298e-11
32.84		1.58256e-11
32.86		1.58259e-11
32.88		1.58227e-11
32.9		1.58317e-11
32.92		1.58299e-11
32.94		1.58278e-11
32.96		1.58317e-11
32.98		1.58262e-11
33		1.5826e-11
33.02		1.58323e-11
33.04		1.58288e-11
33.06		1.5818e-11
33.08		1.58308e-11
33.1		1.58207e-11
33.12		1.58295e-11
33.14		1.58379e-11
33.16		1.58354e-11
33.18		1.5825e-11
33.2		1.58278e-11
33.22		1.58334e-11
33.24		1.58343e-11
33.26		1.58414e-11
33.28		1.58284e-11
33.3		1.58282e-11
33.32		1.58258e-11
33.34		1.58351e-11
33.36		1.58192e-11
33.38		1.58253e-11
33.4		1.58355e-11
33.42		1.58249e-11
33.44		1.58257e-11
33.46		1.58299e-11
33.48		1.5825e-11
33.5		1.58229e-11
33.52		1.5829e-11
33.54		1.58341e-11
33.56		1.58206e-11
33.58		1.58319e-11
33.6		1.58303e-11
33.62		1.58282e-11
33.64		1.58331e-11
33.66		1.58278e-11
33.68		1.58312e-11
33.7		1.58402e-11
33.72		1.58404e-11
33.74		1.58367e-11
33.76		1.58393e-11
33.78		1.58336e-11
33.8		1.58373e-11
33.82		1.58299e-11
33.84		1.58318e-11
33.86		1.58352e-11
33.88		1.58206e-11
33.9		1.58244e-11
33.92		1.58293e-11
33.94		1.58396e-11
33.96		1.58328e-11
33.98		1.58268e-11
34		1.58206e-11
34.02		1.58256e-11
34.04		1.58207e-11
34.06		1.58274e-11
34.08		1.58227e-11
34.1		1.58199e-11
34.12		1.58314e-11
34.14		1.5828e-11
34.16		1.58278e-11
34.18		1.58166e-11
34.2		1.5826e-11
34.22		1.58201e-11
34.24		1.58163e-11
34.26		1.58206e-11
34.28		1.58157e-11
34.3		1.58073e-11
34.32		1.58179e-11
34.34		1.58091e-11
34.36		1.58134e-11
34.38		1.58168e-11
34.4		1.58081e-11
34.42		1.58124e-11
34.44		1.58148e-11
34.46		1.58158e-11
34.48		1.58109e-11
34.5		1.58206e-11
34.52		1.58177e-11
34.54		1.58188e-11
34.56		1.58291e-11
34.58		1.58266e-11
34.6		1.58187e-11
34.62		1.5824e-11
34.64		1.58198e-11
34.66		1.58265e-11
34.68		1.58211e-11
34.7		1.58212e-11
34.72		1.58183e-11
34.74		1.58301e-11
34.76		1.58229e-11
34.78		1.5823e-11
34.8		1.58241e-11
34.82		1.5824e-11
34.84		1.58244e-11
34.86		1.58169e-11
34.88		1.58194e-11
34.9		1.58206e-11
34.92		1.58277e-11
34.94		1.58162e-11
34.96		1.58313e-11
34.98		1.5831e-11
35		1.58146e-11
35.02		1.58271e-11
35.04		1.5822e-11
35.06		1.58227e-11
35.08		1.58148e-11
35.1		1.58236e-11
35.12		1.58126e-11
35.14		1.58231e-11
35.16		1.58119e-11
35.18		1.58157e-11
35.2		1.58099e-11
35.22		1.58084e-11
35.24		1.58234e-11
35.26		1.58217e-11
35.28		1.58188e-11
35.3		1.58154e-11
35.32		1.58178e-11
35.34		1.58281e-11
35.36		1.58212e-11
35.38		1.58138e-11
35.4		1.58207e-11
35.42		1.58145e-11
35.44		1.58135e-11
35.46		1.58176e-11
35.48		1.58111e-11
35.5		1.58068e-11
35.52		1.58162e-11
35.54		1.58082e-11
35.56		1.58064e-11
35.58		1.58213e-11
35.6		1.58179e-11
35.62		1.58112e-11
35.64		1.58083e-11
35.66		1.58192e-11
35.68		1.58211e-11
35.7		1.58202e-11
35.72		1.58094e-11
35.74		1.58136e-11
35.76		1.5812e-11
35.78		1.58112e-11
35.8		1.58177e-11
35.82		1.58163e-11
35.84		1.58229e-11
35.86		1.58115e-11
35.88		1.58189e-11
35.9		1.5817e-11
35.92		1.58134e-11
35.94		1.58247e-11
35.96		1.58119e-11
35.98		1.58099e-11
36		1.58135e-11
36.02		1.58218e-11
36.04		1.58179e-11
36.06		1.5818e-11
36.08		1.58188e-11
36.1		1.58107e-11
36.12		1.58198e-11
36.14		1.58132e-11
36.16		1.58181e-11
36.18		1.58206e-11
36.2		1.58168e-11
36.22		1.58267e-11
36.24		1.58173e-11
36.26		1.58245e-11
36.28		1.58272e-11
36.3		1.5808e-11
36.32		1.58068e-11
36.34		1.58124e-11
36.36		1.58165e-11
36.38		1.58146e-11
36.4		1.58166e-11
36.42		1.58198e-11
36.44		1.58117e-11
36.46		1.5819e-11
36.48		1.58069e-11
36.5		1.58049e-11
36.52		1.58171e-11
36.54		1.5813e-11
36.56		1.58097e-11
36.58		1.58121e-11
36.6		1.58176e-11
36.62		1.58014e-11
36.64		1.58066e-11
36.66		1.58233e-11
36.68		1.58199e-11
36.7		1.58232e-11
36.72		1.58164e-11
36.74		1.58063e-11
36.76		1.5816e-11
36.78		1.58151e-11
36.8		1.58215e-11
36.82		1.58139e-11
36.84		1.58148e-11
36.86		1.58178e-11
36.88		1.58171e-11
36.9		1.58124e-11
36.92		1.58158e-11
36.94		1.58158e-11
36.96		1.5812e-11
36.98		1.58127e-11
37		1.58148e-11
37.02		1.58193e-11
37.04
37.06
37.08
37.1
37.12
37.14
37.16
37.18
37.2
37.22
37.24
37.26
37.28
37.3
37.32
37.34
37.36
37.38
37.4
37.42
37.44
37.46
37.48
37.5
37.52
37.54
37.56
37.58
37.6
37.62
37.64
37.66
37.68
37.7
37.72
37.74
37.76
37.78
37.8
37.82
37.84
37.86
37.88
37.9
37.92
37.94
37.96
37.98
38
38.02
38.04
38.06
38.08
38.1
38.12
38.14
38.16
38.18
38.2
38.22
38.24
38.26
38.28
38.3
38.32
38.34
38.36
38.38
38.4
38.42
38.44
38.46
38.48
38.5
38.52
38.54
38.56
38.58
38.6
38.62
38.64
38.66
38.68
38.7
38.72
38.74
38.76
38.78
38.8
38.82
38.84
38.86
38.88
38.9
38.92
38.94
38.96
38.98
39
39.02
39.04
39.06
39.08
39.1
39.12
39.14
39.16
39.18
39.2
39.22
39.24
39.26
39.28
39.3
39.32
39.34
39.36
39.38
39.4
39.42
39.44
39.46
39.48
39.5
39.52
39.54
39.56
39.58
39.6
39.62
39.64
39.66
39.68
39.7
39.72
39.74
39.76
39.78
39.8
39.82
39.84
39.86
39.88
39.9
39.92
39.94
39.96
[truncated: 4,002 more rows]

## Sheet: 16930068-073.abf
	Cm(F)
time (ms)	100uM 5-HT	100uM cocaine
0.02	1.60708e-11	1.67021e-11
0.04	1.60617e-11	1.6713e-11
0.06	1.60477e-11	1.67131e-11
0.08	1.60574e-11	1.67103e-11
0.1	1.60572e-11	1.67056e-11
0.12	1.60612e-11	1.67046e-11
0.14	1.60683e-11	1.67e-11
0.16	1.60722e-11	1.67038e-11
0.18	1.60676e-11	1.67016e-11
0.2	1.60615e-11	1.6708e-11
0.22	1.60596e-11	1.67018e-11
0.24	1.60618e-11	1.67081e-11
0.26	1.60656e-11	1.6705e-11
0.28	1.60659e-11	1.67115e-11
0.3	1.60592e-11	1.67054e-11
0.32	1.60599e-11	1.67121e-11
0.34	1.60671e-11	1.6712e-11
0.36	1.60603e-11	1.66965e-11
0.38	1.60629e-11	1.671e-11
0.4	1.60701e-11	1.67101e-11
0.42	1.60696e-11	1.67046e-11
0.44	1.60692e-11	1.6708e-11
0.46	1.60647e-11	1.67066e-11
0.48	1.60535e-11	1.67004e-11
0.5	1.60599e-11	1.6703e-11
0.52	1.606e-11	1.67044e-11
0.54	1.60583e-11	1.66958e-11
0.56	1.60517e-11	1.67082e-11
0.58	1.60594e-11	1.67063e-11
0.6	1.60629e-11	1.67067e-11
0.62	1.60641e-11	1.6714e-11
0.64	1.6064e-11	1.67114e-11
0.66	1.60612e-11	1.67114e-11
0.68	1.60724e-11	1.67196e-11
0.7	1.60774e-11	1.67189e-11
0.72	1.60639e-11	1.67019e-11
0.74	1.60627e-11	1.6707e-11
0.76	1.6054e-11	1.67056e-11
0.78	1.60666e-11	1.67127e-11
0.8	1.60627e-11	1.6704e-11
0.82	1.60695e-11	1.67084e-11
0.84	1.60674e-11	1.67079e-11
0.86	1.6059e-11	1.67062e-11
0.88	1.60574e-11	1.67092e-11
0.9	1.60708e-11	1.67e-11
0.92	1.60581e-11	1.67009e-11
0.94	1.60583e-11	1.66987e-11
0.96	1.60598e-11	1.67011e-11
0.98	1.60649e-11	1.67039e-11
1	1.60608e-11	1.6705e-11
1.02	1.60638e-11	1.67138e-11
1.04	1.60635e-11	1.67106e-11
1.06	1.60577e-11	1.67124e-11
1.08	1.60582e-11	1.67088e-11
1.1	1.60616e-11	1.67039e-11
1.12	1.60631e-11	1.66981e-11
1.14	1.60633e-11	1.67054e-11
1.16	1.60651e-11	1.67144e-11
1.18	1.60669e-11	1.67081e-11
1.2	1.60662e-11	1.67027e-11
1.22	1.6071e-11	1.67046e-11
1.24	1.60632e-11	1.67097e-11
1.26	1.60632e-11	1.66978e-11
1.28	1.60639e-11	1.67014e-11
1.3	1.6067e-11	1.67089e-11
1.32	1.60723e-11	1.67077e-11
1.34	1.6064e-11	1.67019e-11
1.36	1.60673e-11	1.67198e-11
1.38	1.60576e-11	1.67029e-11
1.4	1.60603e-11	1.6702e-11
1.42	1.60662e-11	1.67056e-11
1.44	1.60651e-11	1.67106e-11
1.46	1.60716e-11	1.6707e-11
1.48	1.60683e-11	1.67016e-11
1.5	1.60734e-11	1.67051e-11
1.52	1.60717e-11	1.66968e-11
1.54	1.60655e-11	1.66939e-11
1.56	1.60594e-11	1.67103e-11
1.58	1.60706e-11	1.67032e-11
1.6	1.6072e-11	1.67047e-11
1.62	1.607e-11	1.67018e-11
1.64	1.60725e-11	1.67004e-11
1.66	1.60671e-11	1.67005e-11
1.68	1.60642e-11	1.66982e-11
1.7	1.6063e-11	1.67027e-11
1.72	1.60645e-11	1.67125e-11
1.74	1.60633e-11	1.67126e-11
1.76	1.6073e-11	1.67206e-11
1.78	1.60791e-11	1.67121e-11
1.8	1.60674e-11	1.67051e-11
1.82	1.60732e-11	1.6703e-11
1.84	1.60714e-11	1.6704e-11
1.86	1.60758e-11	1.67076e-11
1.88	1.6065e-11	1.67058e-11
1.9	1.60635e-11	1.66999e-11
1.92	1.60684e-11	1.67177e-11
1.94	1.60694e-11	1.67099e-11
1.96	1.60679e-11	1.67046e-11
1.98	1.60727e-11	1.67004e-11
2	1.60697e-11	1.67105e-11
2.02	1.60673e-11	1.67017e-11
2.04	1.60712e-11	1.67155e-11
2.06	1.60716e-11	1.67087e-11
2.08	1.60639e-11	1.67039e-11
2.1	1.60715e-11	1.66994e-11
2.12	1.60643e-11	1.67027e-11
2.14	1.60696e-11	1.67087e-11
2.16	1.60606e-11	1.67159e-11
2.18	1.60581e-11	1.67126e-11
2.2	1.60696e-11	1.66955e-11
2.22	1.60656e-11	1.67056e-11
2.24	1.60734e-11	1.67095e-11
2.26	1.6088e-11	1.67102e-11
2.28	1.60638e-11	1.67053e-11
2.3	1.60699e-11	1.67136e-11
2.32	1.60771e-11	1.67004e-11
2.34	1.60685e-11	1.6697e-11
2.36	1.60623e-11	1.66969e-11
2.38	1.60627e-11	1.66962e-11
2.4	1.60657e-11	1.67077e-11
2.42	1.60722e-11	1.67046e-11
2.44	1.60709e-11	1.6698e-11
2.46	1.60683e-11	1.66964e-11
2.48	1.60663e-11	1.67021e-11
2.5	1.60671e-11	1.66971e-11
2.52	1.60663e-11	1.67049e-11
2.54	1.60669e-11	1.67078e-11
2.56	1.60701e-11	1.67142e-11
2.58	1.60658e-11	1.67135e-11
2.6	1.60677e-11	1.67025e-11
2.62	1.60674e-11	1.67212e-11
2.64	1.60676e-11	1.67075e-11
2.66	1.60648e-11	1.67156e-11
2.68	1.60685e-11	1.67155e-11
2.7	1.6065e-11	1.67077e-11
2.72	1.60661e-11	1.6715e-11
2.74	1.60707e-11	1.67128e-11
2.76	1.60761e-11	1.6717e-11
2.78	1.60715e-11	1.67138e-11
2.8	1.60829e-11	1.67123e-11
2.82	1.6077e-11	1.67189e-11
2.84	1.60801e-11	1.6717e-11
2.86	1.60745e-11	1.67176e-11
2.88	1.60781e-11	1.67127e-11
2.9	1.60858e-11	1.67184e-11
2.92	1.60692e-11	1.67043e-11
2.94	1.60675e-11	1.67112e-11
2.96	1.6064e-11	1.67048e-11
2.98	1.60726e-11	1.67153e-11
3	1.6069e-11	1.6714e-11
3.02	1.60746e-11	1.67249e-11
3.04	1.60688e-11	1.67175e-11
3.06	1.59516e-11	1.67208e-11
3.08	1.59071e-11	1.67134e-11
3.1	1.59158e-11	1.67239e-11
3.12	1.591e-11	1.67189e-11
3.14	1.59072e-11	1.67064e-11
3.16	1.59135e-11	1.67198e-11
3.18	1.59182e-11	1.67192e-11
3.2	1.59307e-11	1.67115e-11
3.22	1.59186e-11	1.67189e-11
3.24	1.59313e-11	1.67222e-11
3.26	1.59252e-11	1.67171e-11
3.28	1.59229e-11	1.67216e-11
3.3	1.59211e-11	1.67098e-11
3.32	1.59178e-11	1.67138e-11
3.34	1.59201e-11	1.67241e-11
3.36	1.59137e-11	1.67261e-11
3.38	1.59166e-11	1.67249e-11
3.4	1.59145e-11	1.67243e-11
3.42	1.59136e-11	1.67171e-11
3.44	1.59163e-11	1.6727e-11
3.46	1.5927e-11	1.67253e-11
3.48	1.59203e-11	1.67174e-11
3.5	1.59177e-11	1.67201e-11
3.52	1.59215e-11	1.67131e-11
3.54	1.59064e-11	1.67172e-11
3.56	1.59149e-11	1.67041e-11
3.58	1.59143e-11	1.67102e-11
3.6	1.59167e-11	1.67191e-11
3.62	1.59144e-11	1.67209e-11
3.64	1.59138e-11	1.67228e-11
3.66	1.59186e-11	1.67182e-11
3.68	1.59001e-11	1.67249e-11
3.7	1.59115e-11	1.67202e-11
3.72	1.59015e-11	1.67238e-11
3.74	1.59153e-11	1.67201e-11
3.76	1.59093e-11	1.67151e-11
3.78	1.592e-11	1.67187e-11
3.8	1.59206e-11	1.67151e-11
3.82	1.59116e-11	1.67192e-11
3.84	1.59172e-11	1.67228e-11
3.86	1.59232e-11	1.67192e-11
3.88	1.5917e-11	1.67159e-11
3.9	1.59187e-11	1.67162e-11
3.92	1.59157e-11	1.67167e-11
3.94	1.59192e-11	1.67194e-11
3.96	1.59144e-11	1.67205e-11
3.98	1.59226e-11	1.6717e-11
4	1.5921e-11	1.67147e-11
4.02	1.5913e-11	1.67138e-11
4.04	1.5925e-11	1.6719e-11
4.06	1.59156e-11	1.67125e-11
4.08	1.59213e-11	1.67113e-11
4.1	1.59274e-11	1.67037e-11
4.12	1.59275e-11	1.67086e-11
4.14	1.59207e-11	1.67075e-11
4.16	1.59216e-11	1.67063e-11
4.18	1.59231e-11	1.6704e-11
4.2	1.59258e-11	1.6712e-11
4.22	1.59269e-11	1.67097e-11
4.24	1.59195e-11	1.67087e-11
4.26	1.59157e-11	1.67102e-11
4.28	1.5928e-11	1.67106e-11
4.3	1.59251e-11	1.67073e-11
4.32	1.59276e-11	1.67081e-11
4.34	1.59239e-11	1.67081e-11
4.36	1.59156e-11	1.67124e-11
4.38	1.59195e-11	1.67238e-11
4.4	1.59191e-11	1.67106e-11
4.42	1.59191e-11	1.67091e-11
4.44	1.59292e-11	1.67092e-11
4.46	1.59238e-11	1.6708e-11
4.48	1.59266e-11	1.67104e-11
4.5	1.59201e-11	1.67118e-11
4.52	1.59141e-11	1.67057e-11
4.54	1.5917e-11	1.67126e-11
4.56	1.59159e-11	1.67058e-11
4.58	1.59179e-11	1.67082e-11
4.6	1.59073e-11	1.67126e-11
4.62	1.59073e-11	1.67119e-11
4.64	1.59036e-11	1.67152e-11
4.66	1.59069e-11	1.6713e-11
4.68	1.59086e-11	1.67087e-11
4.7	1.59036e-11	1.67036e-11
4.72	1.59128e-11	1.67145e-11
4.74	1.59144e-11	1.67193e-11
4.76	1.5917e-11	1.67108e-11
4.78	1.59152e-11	1.67142e-11
4.8	1.59152e-11	1.67104e-11
4.82	1.59074e-11	1.67087e-11
4.84	1.59083e-11	1.67112e-11
4.86	1.58914e-11	1.67057e-11
4.88	1.58691e-11	1.67e-11
4.9	1.58411e-11	1.67122e-11
4.92	1.58423e-11	1.67071e-11
4.94	1.58434e-11	1.67121e-11
4.96	1.58413e-11	1.67154e-11
4.98	1.58353e-11	1.67207e-11
5	1.5841e-11	1.67222e-11
5.02	1.58434e-11	1.67095e-11
5.04	1.58402e-11	1.67077e-11
5.06	1.58457e-11	1.67168e-11
5.08	1.5835e-11	1.67167e-11
5.1	1.58347e-11	1.6712e-11
5.12	1.58369e-11	1.67085e-11
5.14	1.58401e-11	1.67057e-11
5.16	1.58399e-11	1.67075e-11
5.18	1.5823e-11	1.67116e-11
5.2	1.58276e-11	1.67168e-11
5.22	1.58204e-11	1.67075e-11
5.24	1.58393e-11	1.67141e-11
5.26	1.58264e-11	1.67124e-11
5.28	1.58409e-11	1.67123e-11
5.3	1.58425e-11	1.67144e-11
5.32	1.58517e-11	1.67122e-11
5.34	1.5845e-11	1.67069e-11
5.36	1.58427e-11	1.67141e-11
5.38	1.58366e-11	1.67146e-11
5.4	1.58439e-11	1.67175e-11
5.42	1.58408e-11	1.6714e-11
5.44	1.58449e-11	1.67064e-11
5.46	1.58427e-11	1.67182e-11
5.48	1.5841e-11	1.67078e-11
5.5	1.58468e-11	1.67163e-11
5.52	1.58313e-11	1.67122e-11
5.54	1.58278e-11	1.67068e-11
5.56	1.58392e-11	1.67118e-11
5.58	1.5838e-11	1.66999e-11
5.6	1.58377e-11	1.67047e-11
5.62	1.58461e-11	1.67077e-11
5.64	1.5853e-11	1.6703e-11
5.66	1.58387e-11	1.67176e-11
5.68	1.58394e-11	1.6713e-11
5.7	1.58399e-11	1.67132e-11
5.72	1.58469e-11	1.67255e-11
5.74	1.58446e-11	1.67175e-11
5.76	1.5849e-11	1.67231e-11
5.78	1.58439e-11	1.67198e-11
5.8	1.58457e-11	1.67152e-11
5.82	1.58505e-11	1.67219e-11
5.84	1.58499e-11	1.6719e-11
5.86	1.58442e-11	1.67222e-11
5.88	1.58498e-11	1.67205e-11
5.9	1.58486e-11	1.67141e-11
5.92	1.58443e-11	1.67061e-11
5.94	1.58501e-11	1.67102e-11
5.96	1.58508e-11	1.67146e-11
5.98	1.5848e-11	1.67143e-11
6	1.58506e-11	1.67122e-11
6.02	1.58436e-11	1.67027e-11
6.04	1.58632e-11	1.67086e-11
6.06	1.58457e-11	1.67047e-11
6.08	1.58454e-11	1.67169e-11
6.1	1.58435e-11	1.67149e-11
6.12	1.5847e-11	1.67136e-11
6.14	1.58511e-11	1.6714e-11
6.16	1.58519e-11	1.67057e-11
6.18	1.58567e-11	1.67103e-11
6.2	1.58577e-11	1.67129e-11
6.22	1.58599e-11	1.6716e-11
6.24	1.58631e-11	1.67065e-11
6.26	1.58602e-11	1.67136e-11
6.28	1.5858e-11	1.67107e-11
6.3	1.5861e-11	1.6707e-11
6.32	1.58553e-11	1.6717e-11
6.34	1.586e-11	1.67199e-11
6.36	1.585e-11	1.67103e-11
6.38	1.5853e-11	1.67267e-11
6.4	1.58598e-11	1.67196e-11
6.42	1.58503e-11	1.67133e-11
6.44	1.58548e-11	1.67189e-11
6.46	1.58517e-11	1.67111e-11
6.48	1.58505e-11	1.67078e-11
6.5	1.58543e-11	1.67034e-11
6.52	1.58565e-11	1.6704e-11
6.54	1.5853e-11	1.67054e-11
6.56	1.58563e-11	1.66764e-11
6.58	1.58515e-11	1.65785e-11
6.6	1.58497e-11	1.65534e-11
6.62	1.58538e-11	1.65498e-11
6.64	1.58568e-11	1.6553e-11
6.66	1.58454e-11	1.6542e-11
6.68	1.58482e-11	1.65465e-11
6.7	1.58478e-11	1.65559e-11
6.72	1.5855e-11	1.65492e-11
6.74	1.58648e-11	1.6552e-11
6.76	1.58624e-11	1.65506e-11
6.78	1.58607e-11	1.65537e-11
6.8	1.58669e-11	1.6548e-11
6.82	1.58636e-11	1.65491e-11
6.84	1.58624e-11	1.65525e-11
6.86	1.58574e-11	1.65501e-11
6.88	1.58519e-11	1.65519e-11
6.9	1.58487e-11	1.65448e-11
6.92	1.58582e-11	1.65394e-11
6.94	1.5858e-11	1.65354e-11
6.96	1.5857e-11	1.65416e-11
6.98	1.58526e-11	1.65468e-11
7	1.58619e-11	1.65282e-11
7.02	1.58474e-11	1.65322e-11
7.04	1.58581e-11	1.65339e-11
7.06	1.58593e-11	1.65296e-11
7.08	1.59041e-11	1.65252e-11
7.1	1.59325e-11	1.65322e-11
7.12	1.59395e-11	1.65283e-11
7.14	1.59472e-11	1.65238e-11
7.16	1.596e-11	1.65201e-11
7.18	1.59466e-11	1.65319e-11
7.2	1.59548e-11	1.65248e-11
7.22	1.59553e-11	1.65329e-11
7.24	1.59582e-11	1.65355e-11
7.26	1.59503e-11	1.65262e-11
7.28	1.59552e-11	1.65217e-11
7.3	1.59544e-11	1.6527e-11
7.32	1.59547e-11	1.65296e-11
7.34	1.59583e-11	1.65246e-11
7.36	1.59568e-11	1.6524e-11
7.38	1.59554e-11	1.65268e-11
7.4	1.59632e-11	1.65173e-11
7.42	1.59618e-11	1.65228e-11
7.44	1.59579e-11	1.65231e-11
7.46	1.59567e-11	1.65272e-11
7.48	1.59567e-11	1.65215e-11
7.5	1.59533e-11	1.65215e-11
7.52	1.59532e-11	1.65247e-11
7.54	1.5951e-11	1.65211e-11
7.56	1.59481e-11	1.65217e-11
7.58	1.5954e-11	1.65263e-11
7.6	1.59595e-11	1.6517e-11
7.62	1.59534e-11	1.65168e-11
7.64	1.59517e-11	1.65238e-11
7.66	1.59551e-11	1.6516e-11
7.68	1.59553e-11	1.65305e-11
7.7	1.59565e-11	1.65217e-11
7.72	1.59634e-11	1.65277e-11
7.74	1.59614e-11	1.65201e-11
7.76	1.59584e-11	1.65238e-11
7.78	1.59572e-11	1.65278e-11
7.8	1.59516e-11	1.65343e-11
7.82	1.5959e-11	1.65343e-11
7.84	1.59606e-11	1.65249e-11
7.86	1.59554e-11	1.65308e-11
7.88	1.59606e-11	1.65324e-11
7.9	1.59648e-11	1.65236e-11
7.92	1.59495e-11	1.65174e-11
7.94	1.59554e-11	1.65259e-11
7.96	1.59533e-11	1.65205e-11
7.98	1.59535e-11	1.6526e-11
8	1.59692e-11	1.65262e-11
8.02	1.59584e-11	1.65237e-11
8.04	1.59509e-11	1.6525e-11
8.06	1.59496e-11	1.65185e-11
8.08	1.59568e-11	1.65325e-11
8.1	1.59529e-11	1.65163e-11
8.12	1.59608e-11	1.6524e-11
8.14	1.59551e-11	1.65266e-11
8.16	1.59523e-11	1.65265e-11
8.18	1.59583e-11	1.6523e-11
8.2	1.59564e-11	1.65172e-11
8.22	1.59524e-11	1.65279e-11
8.24	1.59599e-11	1.65204e-11
8.26	1.59578e-11	1.65215e-11
8.28	1.59555e-11	1.65167e-11
8.3	1.59563e-11	1.65207e-11
8.32	1.59629e-11	1.64863e-11
8.34	1.59572e-11	1.64768e-11
8.36	1.59651e-11	1.64539e-11
8.38	1.59522e-11	1.64429e-11
8.4	1.59536e-11	1.64539e-11
8.42	1.59472e-11	1.64487e-11
8.44	1.59503e-11	1.64449e-11
8.46	1.59597e-11	1.64564e-11
8.48	1.59618e-11	1.64534e-11
8.5	1.59616e-11	1.64502e-11
8.52	1.59551e-11	1.6453e-11
8.54	1.59639e-11	1.64511e-11
8.56	1.59459e-11	1.64505e-11
8.58	1.59573e-11	1.64556e-11
8.6	1.59534e-11	1.64538e-11
8.62	1.59668e-11	1.64585e-11
8.64	1.59548e-11	1.64551e-11
8.66	1.59579e-11	1.64381e-11
8.68	1.59642e-11	1.645e-11
8.7	1.59531e-11	1.64586e-11
8.72	1.59586e-11	1.64594e-11
8.74	1.59532e-11	1.64592e-11
8.76	1.59526e-11	1.6459e-11
8.78	1.59515e-11	1.64595e-11
8.8	1.59657e-11	1.64479e-11
8.82	1.60127e-11	1.64613e-11
8.84	1.6016e-11	1.64574e-11
8.86	1.60278e-11	1.64608e-11
8.88	1.60186e-11	1.64641e-11
8.9	1.60266e-11	1.64673e-11
8.92	1.60296e-11	1.64547e-11
8.94	1.60318e-11	1.64565e-11
8.96	1.60271e-11	1.64532e-11
8.98	1.60289e-11	1.64708e-11
9	1.60239e-11	1.64668e-11
9.02	1.60289e-11	1.64816e-11
9.04	1.60268e-11	1.64627e-11
9.06	1.60373e-11	1.64645e-11
9.08	1.60273e-11	1.64615e-11
9.1	1.60325e-11	1.64783e-11
9.12	1.60263e-11	1.64784e-11
9.14	1.60337e-11	1.6464e-11
9.16	1.60287e-11	1.64772e-11
9.18	1.60265e-11	1.64629e-11
9.2	1.6026e-11	1.64661e-11
9.22	1.60256e-11	1.64576e-11
9.24	1.60269e-11	1.64618e-11
9.26	1.60311e-11	1.64611e-11
9.28	1.60304e-11	1.64551e-11
9.3	1.60247e-11	1.64636e-11
9.32	1.60233e-11	1.6467e-11
9.34	1.60325e-11	1.64604e-11
9.36	1.60335e-11	1.64614e-11
9.38	1.60262e-11	1.6466e-11
9.4	1.60308e-11	1.64612e-11
9.42	1.60379e-11	1.64773e-11
9.44	1.60284e-11	1.64702e-11
9.46	1.60276e-11	1.64637e-11
9.48	1.60338e-11	1.64653e-11
9.5	1.6034e-11	1.64618e-11
9.52	1.60271e-11	1.6477e-11
9.54	1.60216e-11	1.64766e-11
9.56	1.60263e-11	1.64766e-11
9.58	1.60208e-11	1.64689e-11
9.6	1.60213e-11	1.64683e-11
9.62	1.60305e-11	1.64781e-11
9.64	1.60219e-11	1.64766e-11
9.66	1.60145e-11	1.64813e-11
9.68	1.60204e-11	1.64745e-11
9.7	1.60228e-11	1.64847e-11
9.72	1.60248e-11	1.64748e-11
9.74	1.6013e-11	1.64762e-11
9.76	1.60164e-11	1.64794e-11
9.78	1.60173e-11	1.64743e-11
9.8	1.60138e-11	1.64867e-11
9.82	1.60099e-11	1.64839e-11
9.84	1.60229e-11	1.64844e-11
9.86	1.60188e-11	1.64803e-11
9.88	1.60237e-11	1.64854e-11
9.9	1.60286e-11	1.64882e-11
9.92	1.60256e-11	1.64764e-11
9.94	1.60223e-11	1.6484e-11
9.96	1.60312e-11	1.64817e-11
9.98	1.60227e-11	1.64761e-11
10	1.60279e-11	1.64746e-11
10.02	1.60217e-11	1.64783e-11
10.04	1.60272e-11	1.64873e-11
10.06	1.6016e-11	1.64816e-11
10.08	1.602e-11	1.6474e-11
10.1	1.60113e-11	1.64806e-11
10.12	1.60166e-11	1.6482e-11
10.14	1.60118e-11	1.64898e-11
10.16	1.60002e-11	1.64873e-11
10.18	1.60171e-11	1.64797e-11
10.2	1.60067e-11	1.64796e-11
10.22	1.60056e-11	1.64882e-11
10.24	1.60084e-11	1.64841e-11
10.26	1.60162e-11	1.64936e-11
10.28	1.60217e-11	1.64859e-11
10.3	1.60152e-11	1.64675e-11
10.32	1.60221e-11	1.64723e-11
10.34	1.60171e-11	1.64743e-11
10.36	1.60112e-11	1.64843e-11
10.38	1.60159e-11	1.64809e-11
10.4	1.60122e-11	1.64741e-11
10.42	1.60138e-11	1.64858e-11
10.44	1.601e-11	1.64782e-11
10.46	1.60115e-11	1.64813e-11
10.48	1.6017e-11	1.65438e-11
10.5	1.60103e-11	1.6558e-11
10.52	1.60062e-11	1.65522e-11
10.54	1.60066e-11	1.65602e-11
10.56	1.6008e-11	1.65632e-11
10.58	1.60052e-11	1.65574e-11
10.6	1.60139e-11	1.65684e-11
10.62	1.60132e-11	1.65628e-11
10.64	1.60096e-11	1.6571e-11
10.66	1.60195e-11	1.65684e-11
10.68	1.60045e-11	1.65631e-11
10.7	1.60116e-11	1.65476e-11
10.72	1.60081e-11	1.65644e-11
10.74	1.6003e-11	1.65684e-11
10.76	1.5998e-11	1.65708e-11
10.78	1.59939e-11	1.6571e-11
10.8	1.60039e-11	1.65709e-11
10.82	1.59999e-11	1.65688e-11
10.84	1.59994e-11	1.65653e-11
10.86	1.6007e-11	1.65678e-11
10.88	1.60056e-11	1.65671e-11
10.9	1.59947e-11	1.65573e-11
10.92	1.59966e-11	1.65649e-11
10.94	1.60091e-11	1.65678e-11
10.96	1.59872e-11	1.6562e-11
10.98	1.59912e-11	1.65682e-11
11	1.59287e-11	1.65617e-11
11.02	1.59734e-11	1.65685e-11
11.04	1.5936e-11	1.65599e-11
11.06	1.59241e-11	1.657e-11
11.08	1.59256e-11	1.65676e-11
11.1	1.5917e-11	1.65687e-11
11.12	1.59249e-11	1.65628e-11
11.14	1.59248e-11	1.65567e-11
11.16	1.59204e-11	1.65739e-11
11.18	1.5909e-11	1.65681e-11
11.2	1.59237e-11	1.65726e-11
11.22	1.59323e-11	1.65652e-11
11.24	1.59235e-11	1.65614e-11
11.26	1.59247e-11	1.65596e-11
11.28	1.59234e-11	1.6564e-11
11.3	1.59271e-11	1.65603e-11
11.32	1.59276e-11	1.65555e-11
11.34	1.59321e-11	1.65647e-11
11.36	1.59259e-11	1.65593e-11
11.38	1.59276e-11	1.65696e-11
11.4	1.59276e-11	1.65566e-11
11.42	1.59208e-11	1.65605e-11
11.44	1.59168e-11	1.65571e-11
11.46	1.59201e-11	1.65684e-11
11.48	1.59228e-11	1.65543e-11
11.5	1.59257e-11	1.6563e-11
11.52	1.59234e-11	1.65523e-11
11.54	1.59215e-11	1.6558e-11
11.56	1.59246e-11	1.65623e-11
11.58	1.59145e-11	1.6563e-11
11.6	1.59203e-11	1.65673e-11
11.62	1.59111e-11	1.65552e-11
11.64	1.59203e-11	1.65645e-11
11.66	1.59257e-11	1.65736e-11
11.68	1.59179e-11	1.65566e-11
11.7	1.5923e-11	1.65639e-11
11.72	1.59219e-11	1.65521e-11
11.74	1.59268e-11	1.65609e-11
11.76	1.59278e-11	1.65724e-11
11.78	1.59259e-11	1.65596e-11
11.8	1.59179e-11	1.65553e-11
11.82	1.59207e-11	1.6566e-11
11.84	1.59085e-11	1.65655e-11
11.86	1.5909e-11	1.65697e-11
11.88	1.59143e-11	1.65649e-11
11.9	1.59207e-11	1.65558e-11
11.92	1.59143e-11	1.65584e-11
11.94	1.59368e-11	1.65602e-11
11.96	1.5926e-11	1.65561e-11
11.98	1.59106e-11	1.65564e-11
12	1.59109e-11	1.6562e-11
12.02	1.5909e-11	1.65616e-11
12.04	1.59037e-11	1.65651e-11
12.06	1.59085e-11	1.65647e-11
12.08	1.58996e-11	1.65613e-11
12.1	1.59073e-11	1.65651e-11
12.12	1.59137e-11	1.65646e-11
12.14	1.59051e-11	1.65662e-11
12.16	1.59164e-11	1.65671e-11
12.18	1.59061e-11	1.65643e-11
12.2	1.5902e-11	1.65611e-11
12.22	1.58959e-11	1.65656e-11
12.24	1.59073e-11	1.65687e-11
12.26	1.5903e-11	1.65548e-11
12.28	1.5903e-11	1.65496e-11
12.3	1.59066e-11	1.6561e-11
12.32	1.58997e-11	1.65588e-11
12.34	1.59094e-11	1.65537e-11
12.36	1.5906e-11	1.65691e-11
12.38	1.59092e-11	1.6552e-11
12.4	1.59092e-11	1.65582e-11
12.42	1.59166e-11	1.65569e-11
12.44	1.59085e-11	1.65578e-11
12.46	1.59228e-11	1.659e-11
12.48	1.59089e-11	1.65977e-11
12.5	1.59018e-11	1.6607e-11
12.52	1.59064e-11	1.65903e-11
12.54	1.5902e-11	1.66018e-11
12.56	1.58953e-11	1.66046e-11
12.58	1.59031e-11	1.66059e-11
12.6	1.58959e-11	1.66048e-11
12.62	1.58982e-11	1.66095e-11
12.64	1.58908e-11	1.66094e-11
12.66	1.58853e-11	1.66062e-11
12.68	1.58951e-11	1.66072e-11
12.7	1.5895e-11	1.66117e-11
12.72	1.59009e-11	1.66058e-11
12.74	1.59052e-11	1.66068e-11
12.76	1.58933e-11	1.65948e-11
12.78	1.59029e-11	1.65965e-11
12.8	1.59067e-11	1.65964e-11
12.82	1.59121e-11	1.65969e-11
12.84	1.59079e-11	1.65809e-11
12.86	1.59151e-11	1.65918e-11
12.88	1.59161e-11	1.65824e-11
12.9	1.59148e-11	1.65802e-11
12.92	1.59183e-11	1.65808e-11
12.94	1.5914e-11	1.65835e-11
12.96	1.59186e-11	1.65826e-11
12.98	1.59233e-11	1.65867e-11
13	1.59264e-11	1.65856e-11
13.02	1.59297e-11	1.65762e-11
13.04	1.5939e-11	1.65854e-11
13.06	1.5932e-11	1.65912e-11
13.08	1.5934e-11	1.65849e-11
13.1	1.59336e-11	1.65851e-11
13.12	1.59325e-11	1.65776e-11
13.14	1.59399e-11	1.65721e-11
13.16	1.59415e-11	1.65878e-11
13.18	1.59431e-11	1.65779e-11
13.2	1.59302e-11	1.65772e-11
13.22	1.59368e-11	1.65801e-11
13.24	1.59543e-11	1.65755e-11
13.26	1.59511e-11	1.65737e-11
13.28	1.595e-11	1.65806e-11
13.3	1.59527e-11	1.65702e-11
13.32	1.59522e-11	1.65741e-11
13.34	1.59652e-11	1.65739e-11
13.36	1.59549e-11	1.65741e-11
13.38	1.59589e-11	1.65724e-11
13.4	1.59526e-11	1.65666e-11
13.42	1.59647e-11	1.65769e-11
13.44	1.59602e-11	1.65708e-11
13.46	1.59676e-11	1.65717e-11
13.48	1.59631e-11	1.65726e-11
13.5	1.59696e-11	1.6575e-11
13.52	1.59729e-11	1.65671e-11
13.54	1.59712e-11	1.65762e-11
13.56	1.59741e-11	1.65704e-11
13.58	1.59734e-11	1.65656e-11
13.6	1.59718e-11	1.65672e-11
13.62	1.59679e-11	1.65658e-11
13.64	1.59772e-11	1.65699e-11
13.66	1.59779e-11	1.65669e-11
13.68	1.5982e-11	1.65639e-11
13.7	1.59879e-11	1.65598e-11
13.72	1.59826e-11	1.65653e-11
13.74	1.59879e-11	1.65674e-11
13.76	1.59788e-11	1.65649e-11
13.78	1.59849e-11	1.65646e-11
13.8	1.59924e-11	1.65684e-11
13.82	1.59826e-11	1.65755e-11
13.84	1.59922e-11	1.65589e-11
13.86	1.59884e-11	1.65653e-11
13.88	1.59967e-11	1.65568e-11
13.9	1.5995e-11	1.65612e-11
13.92	1.59916e-11	1.65607e-11
13.94	1.59893e-11	1.65583e-11
13.96	1.59988e-11	1.65569e-11
13.98	1.59989e-11	1.65584e-11
14	1.60013e-11	1.65673e-11
14.02	1.60035e-11	1.6554e-11
14.04	1.60082e-11	1.65449e-11
14.06	1.6001e-11	1.64656e-11
14.08	1.6004e-11	1.65386e-11
14.1	1.59999e-11	1.65025e-11
14.12	1.60064e-11	1.64948e-11
14.14	1.60006e-11	1.64963e-11
14.16	1.60068e-11	1.64783e-11
14.18	1.60029e-11	1.648e-11
14.2	1.60087e-11	1.648e-11
14.22	1.60108e-11	1.64769e-11
14.24	1.60052e-11	1.648e-11
14.26	1.60053e-11	1.6473e-11
14.28	1.60087e-11	1.64835e-11
14.3	1.60112e-11	1.64735e-11
14.32	1.60082e-11	1.64721e-11
14.34	1.60152e-11	1.64762e-11
14.36	1.60159e-11	1.6473e-11
14.38	1.60189e-11	1.64668e-11
14.4	1.60203e-11	1.64732e-11
14.42	1.60175e-11	1.64837e-11
14.44	1.60211e-11	1.64755e-11
14.46	1.6014e-11	1.64805e-11
14.48	1.60152e-11	1.64738e-11
14.5	1.60229e-11	1.64802e-11
14.52	1.60194e-11	1.64854e-11
14.54	1.60256e-11	1.64759e-11
14.56	1.60161e-11	1.64785e-11
14.58	1.60195e-11	1.64749e-11
14.6	1.60298e-11	1.64722e-11
14.62	1.60271e-11	1.64813e-11
14.64	1.60216e-11	1.64812e-11
14.66	1.60198e-11	1.64729e-11
14.68	1.60121e-11	1.64749e-11
14.7	1.60194e-11	1.64835e-11
14.72	1.60158e-11	1.6475e-11
14.74	1.60179e-11	1.64707e-11
14.76	1.60151e-11	1.64777e-11
14.78	1.60124e-11	1.64782e-11
14.8	1.60283e-11	1.64831e-11
14.82	1.60182e-11	1.64804e-11
14.84	1.60255e-11	1.64776e-11
14.86	1.60282e-11	1.6479e-11
14.88	1.6032e-11	1.64821e-11
14.9	1.60044e-11	1.64733e-11
14.92	1.60124e-11	1.64727e-11
14.94	1.60201e-11	1.64796e-11
14.96	1.60293e-11	1.64696e-11
14.98	1.60325e-11	1.64812e-11
15	1.60298e-11	1.64847e-11
15.02	1.60252e-11	1.6486e-11
15.04	1.60262e-11	1.64861e-11
15.06	1.6033e-11	1.64811e-11
15.08	1.60235e-11	1.64813e-11
15.1	1.60238e-11	1.64735e-11
15.12	1.60275e-11	1.64748e-11
15.14	1.60245e-11	1.64813e-11
15.16	1.60275e-11	1.64812e-11
15.18	1.60312e-11	1.64776e-11
15.2	1.60396e-11	1.64838e-11
15.22	1.60322e-11	1.64826e-11
15.24	1.60359e-11	1.64798e-11
15.26	1.60397e-11	1.6481e-11
15.28	1.60218e-11	1.64697e-11
15.3	1.60354e-11	1.6479e-11
15.32	1.60352e-11	1.64779e-11
15.34	1.60307e-11	1.64741e-11
15.36	1.60279e-11	1.64804e-11
15.38	1.60327e-11	1.64702e-11
15.4	1.60328e-11	1.64749e-11
15.42	1.60419e-11	1.64728e-11
15.44	1.60311e-11	1.64783e-11
15.46	1.60309e-11	1.64795e-11
15.48	1.6031e-11	1.64775e-11
15.5	1.60214e-11	1.64778e-11
15.52	1.60208e-11	1.64716e-11
15.54	1.6035e-11	1.64706e-11
15.56	1.60257e-11	1.64723e-11
15.58	1.60218e-11	1.64817e-11
15.6	1.60299e-11	1.64769e-11
15.62	1.60267e-11	1.64827e-11
15.64	1.6037e-11	1.64784e-11
15.66	1.6038e-11	1.64727e-11
15.68	1.60328e-11	1.64767e-11
15.7	1.60236e-11	1.64838e-11
15.72	1.60418e-11	1.64693e-11
15.74	1.60516e-11	1.64827e-11
15.76	1.60391e-11	1.64666e-11
15.78	1.60358e-11	1.64773e-11
15.8	1.60307e-11	1.64739e-11
15.82	1.6034e-11	1.64748e-11
15.84	1.60403e-11	1.64787e-11
15.86	1.60408e-11	1.6479e-11
15.88	1.60395e-11	1.64815e-11
15.9	1.60405e-11	1.64834e-11
15.92	1.60307e-11	1.64713e-11
15.94	1.6036e-11	1.64724e-11
15.96	1.60415e-11	1.64752e-11
15.98	1.60491e-11	1.64773e-11
16	1.60323e-11	1.64813e-11
16.02	1.60397e-11	1.64782e-11
16.04	1.60314e-11	1.64779e-11
16.06	1.60411e-11	1.64774e-11
16.08	1.60459e-11	1.64749e-11
16.1	1.60321e-11	1.64802e-11
16.12	1.60383e-11	1.64767e-11
16.14	1.60341e-11	1.64775e-11
16.16	1.60348e-11	1.64679e-11
16.18	1.6037e-11	1.6461e-11
16.2	1.60386e-11	1.64503e-11
16.22	1.60402e-11	1.64556e-11
16.24	1.60429e-11	1.64595e-11
16.26	1.60524e-11	1.64415e-11
16.28	1.60488e-11	1.64478e-11
16.3	1.60528e-11	1.64493e-11
16.32	1.60541e-11	1.64494e-11
16.34	1.6047e-11	1.6446e-11
16.36	1.60377e-11	1.64444e-11
16.38	1.6041e-11	1.64413e-11
16.4	1.6045e-11	1.64388e-11
16.42	1.60365e-11	1.64374e-11
16.44	1.60233e-11	1.6444e-11
16.46	1.60426e-11	1.64406e-11
16.48	1.60449e-11	1.6443e-11
16.5	1.60432e-11	1.64349e-11
16.52	1.6039e-11	1.64382e-11
16.54	1.60415e-11	1.64328e-11
16.56	1.60361e-11	1.64304e-11
16.58	1.60417e-11	1.6425e-11
16.6	1.6039e-11	1.64209e-11
16.62	1.60494e-11	1.64209e-11
16.64	1.60471e-11	1.64312e-11
16.66	1.60416e-11	1.64238e-11
16.68	1.60413e-11	1.64259e-11
16.7	1.60364e-11	1.64233e-11
16.72	1.60473e-11	1.64209e-11
16.74	1.60525e-11	1.64219e-11
16.76	1.60471e-11	1.64225e-11
16.78	1.60475e-11	1.64324e-11
16.8	1.60488e-11	1.64265e-11
16.82	1.60524e-11	1.64157e-11
16.84	1.60376e-11	1.6428e-11
16.86	1.60461e-11	1.64241e-11
16.88	1.60434e-11	1.64271e-11
16.9	1.60427e-11	1.64251e-11
16.92	1.60421e-11	1.64248e-11
16.94	1.60435e-11	1.64226e-11
16.96	1.60346e-11	1.64246e-11
16.98	1.60466e-11	1.64318e-11
17	1.60466e-11	1.64302e-11
17.02	1.60523e-11	1.64294e-11
17.04	1.60488e-11	1.6436e-11
17.06	1.6045e-11	1.64203e-11
17.08	1.60431e-11	1.6422e-11
17.1	1.604e-11	1.6429e-11
17.12	1.60344e-11	1.64237e-11
17.14	1.60419e-11	1.64339e-11
17.16	1.60428e-11	1.64251e-11
17.18	1.60465e-11	1.64286e-11
17.2	1.60455e-11	1.64201e-11
17.22	1.60428e-11	1.64174e-11
17.24	1.60558e-11	1.64224e-11
17.26	1.60416e-11	1.64169e-11
17.28	1.60586e-11	1.64174e-11
17.3	1.60428e-11	1.64244e-11
17.32	1.60555e-11	1.64297e-11
17.34	1.60584e-11	1.64278e-11
17.36	1.60468e-11	1.64275e-11
17.38	1.60515e-11	1.64282e-11
17.4	1.60497e-11	1.64226e-11
17.42	1.60515e-11	1.64317e-11
17.44	1.60583e-11	1.64239e-11
17.46	1.60533e-11	1.64221e-11
17.48	1.60502e-11	1.64313e-11
17.5	1.60505e-11	1.6436e-11
17.52	1.60428e-11	1.64341e-11
17.54	1.60479e-11	1.64329e-11
17.56	1.60473e-11	1.64246e-11
17.58	1.6053e-11	1.64316e-11
17.6	1.60555e-11	1.64268e-11
17.62	1.60446e-11	1.64264e-11
17.64	1.60428e-11	1.6442e-11
17.66	1.60381e-11	1.64164e-11
17.68	1.60476e-11	1.64269e-11
17.7	1.60431e-11	1.64275e-11
17.72	1.60509e-11	1.64303e-11
17.74	1.60499e-11	1.64164e-11
17.76	1.6042e-11	1.64189e-11
17.78	1.60411e-11	1.64172e-11
17.8	1.60427e-11	1.64169e-11
17.82	1.60409e-11	1.64205e-11
17.84	1.60476e-11	1.64237e-11
17.86	1.60546e-11	1.64243e-11
17.88	1.60598e-11	1.64304e-11
17.9	1.60546e-11	1.64318e-11
17.92	1.60612e-11	1.64249e-11
17.94	1.60548e-11	1.64301e-11
17.96	1.60653e-11	1.64316e-11
17.98	1.60545e-11	1.64235e-11
18	1.60548e-11	1.64306e-11
18.02	1.60449e-11	1.64309e-11
18.04	1.60552e-11	1.64207e-11
18.06	1.60506e-11	1.64321e-11
18.08	1.60456e-11	1.64344e-11
18.1	1.60469e-11	1.64324e-11
18.12	1.60614e-11	1.643e-11
18.14	1.60541e-11	1.64314e-11
18.16	1.60601e-11	1.64357e-11
18.18	1.60517e-11	1.64373e-11
18.2	1.60421e-11	1.64283e-11
18.22	1.60464e-11	1.64305e-11
18.24	1.60506e-11	1.64324e-11
18.26	1.60586e-11	1.64437e-11
18.28	1.60569e-11	1.64362e-11
18.3	1.60483e-11	1.64322e-11
18.32	1.60433e-11	1.64278e-11
18.34	1.6049e-11	1.64385e-11
18.36	1.60629e-11	1.64286e-11
18.38	1.60656e-11	1.6424e-11
18.4	1.60659e-11	1.64298e-11
18.42	1.60647e-11	1.64246e-11
18.44	1.60628e-11	1.64276e-11
18.46	1.60644e-11	1.64245e-11
18.48	1.60625e-11	1.64297e-11
18.5	1.60686e-11	1.64363e-11
18.52	1.6063e-11	1.6436e-11
18.54	1.60607e-11	1.64297e-11
18.56	1.6057e-11	1.64222e-11
18.58	1.6058e-11	1.64322e-11
18.6	1.60606e-11	1.64343e-11
18.62	1.60536e-11	1.64326e-11
18.64	1.60637e-11	1.64248e-11
18.66	1.60599e-11	1.64263e-11
18.68	1.60695e-11	1.64303e-11
18.7	1.60626e-11	1.64276e-11
18.72	1.60587e-11	1.64325e-11
18.74	1.60615e-11	1.64307e-11
18.76	1.60573e-11	1.64221e-11
18.78	1.60677e-11	1.64325e-11
18.8	1.60621e-11	1.64249e-11
18.82	1.60695e-11	1.64308e-11
18.84	1.60679e-11	1.64289e-11
18.86	1.60616e-11	1.64334e-11
18.88	1.60689e-11	1.64194e-11
18.9	1.60604e-11	1.64284e-11
18.92	1.60622e-11	1.64322e-11
18.94	1.60632e-11	1.64381e-11
18.96	1.60592e-11	1.64315e-11
18.98	1.6061e-11	1.64302e-11
19	1.60559e-11	1.64308e-11
19.02	1.60669e-11	1.64332e-11
19.04	1.60612e-11	1.64257e-11
19.06	1.6062e-11	1.64352e-11
19.08	1.60632e-11	1.64313e-11
19.1	1.60633e-11	1.6434e-11
19.12	1.60584e-11	1.64292e-11
19.14	1.60541e-11	1.64349e-11
19.16	1.60553e-11	1.64385e-11
19.18	1.60618e-11	1.64361e-11
19.2	1.60681e-11	1.64379e-11
19.22	1.60647e-11	1.643e-11
19.24	1.60603e-11	1.64315e-11
19.26	1.60636e-11	1.64261e-11
19.28	1.60619e-11	1.64351e-11
19.3	1.60614e-11	1.64349e-11
19.32	1.60583e-11	1.6426e-11
19.34	1.6057e-11	1.64281e-11
19.36	1.60573e-11	1.64316e-11
19.38	1.60544e-11	1.64316e-11
19.4	1.6063e-11	1.64261e-11
19.42	1.60489e-11	1.64236e-11
19.44	1.60663e-11	1.64217e-11
19.46	1.60558e-11	1.64211e-11
19.48	1.60626e-11	1.64272e-11
19.5	1.60596e-11	1.64319e-11
19.52	1.60655e-11	1.64238e-11
19.54	1.60536e-11	1.64279e-11
19.56	1.60614e-11	1.64306e-11
19.58	1.60637e-11	1.64313e-11
19.6	1.60563e-11	1.64317e-11
19.62	1.60544e-11	1.6446e-11
19.64	1.60658e-11	1.64397e-11
19.66	1.60697e-11	1.64398e-11
19.68	1.60674e-11	1.64329e-11
19.7	1.60697e-11	1.64436e-11
19.72	1.60745e-11	1.64331e-11
19.74	1.60703e-11	1.64363e-11
19.76	1.60647e-11	1.64358e-11
19.78	1.60655e-11	1.64462e-11
19.8	1.60702e-11	1.6438e-11
19.82	1.60672e-11	1.64375e-11
19.84	1.60598e-11	1.64414e-11
19.86	1.60673e-11	1.64454e-11
19.88	1.60685e-11	1.64385e-11
19.9	1.60626e-11	1.64456e-11
19.92	1.60511e-11	1.64394e-11
19.94	1.60603e-11	1.64341e-11
19.96	1.60683e-11	1.64365e-11
19.98	1.60635e-11	1.64325e-11
20	1.60715e-11	1.64355e-11
20.02	1.60699e-11	1.64356e-11
20.04	1.60672e-11	1.64385e-11
20.06	1.60701e-11	1.64385e-11
20.08	1.60639e-11	1.64346e-11
20.1	1.60607e-11	1.64419e-11
20.12	1.60553e-11	1.64353e-11
20.14	1.60753e-11	1.644e-11
20.16	1.60688e-11	1.64485e-11
20.18	1.60704e-11	1.6447e-11
20.2	1.60642e-11	1.64425e-11
20.22	1.60685e-11	1.6445e-11
20.24	1.60714e-11	1.64435e-11
20.26	1.60678e-11	1.64507e-11
20.28	1.6065e-11	1.64401e-11
20.3	1.60581e-11	1.64429e-11
20.32	1.60693e-11	1.6443e-11
20.34	1.60628e-11	1.64423e-11
20.36	1.60581e-11	1.64469e-11
20.38	1.60574e-11	1.64485e-11
20.4	1.60696e-11	1.64457e-11
20.42	1.606e-11	1.64457e-11
20.44	1.60651e-11	1.64345e-11
20.46	1.60635e-11	1.64437e-11
20.48	1.60595e-11	1.64448e-11
20.5	1.60613e-11	1.64403e-11
20.52	1.60578e-11	1.64461e-11
20.54	1.60715e-11	1.64369e-11
20.56	1.60604e-11	1.64424e-11
20.58	1.60578e-11	1.6434e-11
20.6	1.60646e-11	1.64454e-11
20.62	1.60595e-11	1.64419e-11
20.64	1.60634e-11	1.64419e-11
20.66	1.60664e-11	1.64433e-11
20.68	1.60659e-11	1.64382e-11
20.7	1.60644e-11	1.64437e-11
20.72	1.60697e-11	1.64455e-11
20.74	1.60701e-11	1.64478e-11
20.76	1.60715e-11	1.64459e-11
20.78	1.60568e-11	1.64498e-11
20.8	1.60675e-11	1.64487e-11
20.82	1.60609e-11	1.64517e-11
20.84	1.60594e-11	1.64514e-11
20.86	1.60699e-11	1.64462e-11
20.88	1.60608e-11	1.64426e-11
20.9	1.6059e-11	1.64463e-11
20.92	1.60502e-11	1.64448e-11
20.94	1.60646e-11	1.64462e-11
20.96	1.60638e-11	1.64395e-11
20.98	1.60671e-11	1.64362e-11
21	1.60591e-11	1.64315e-11
21.02	1.60597e-11	1.64423e-11
21.04	1.60566e-11	1.64391e-11
21.06	1.60704e-11	1.64384e-11
21.08	1.60552e-11	1.64489e-11
21.1	1.60621e-11	1.64551e-11
21.12	1.60707e-11	1.64475e-11
21.14	1.60582e-11	1.64421e-11
21.16	1.60536e-11	1.64449e-11
21.18	1.60588e-11	1.64414e-11
21.2	1.60632e-11	1.64393e-11
21.22	1.60654e-11	1.64493e-11
21.24	1.60568e-11	1.64394e-11
21.26	1.60707e-11	1.64454e-11
21.28	1.60522e-11	1.64432e-11
21.3	1.60589e-11	1.64426e-11
21.32	1.60575e-11	1.64436e-11
21.34	1.60546e-11	1.64441e-11
21.36	1.60685e-11	1.64369e-11
21.38	1.60691e-11	1.64424e-11
21.4	1.60528e-11	1.64433e-11
21.42	1.60673e-11	1.64465e-11
21.44	1.60604e-11	1.64542e-11
21.46	1.60637e-11	1.64442e-11
21.48	1.60645e-11	1.64379e-11
21.5	1.60679e-11	1.64456e-11
21.52	1.60629e-11	1.64417e-11
21.54	1.60617e-11	1.64466e-11
21.56	1.60634e-11	1.6452e-11
21.58	1.60541e-11	1.64453e-11
21.6	1.60565e-11	1.64479e-11
21.62	1.6064e-11	1.64563e-11
21.64	1.60654e-11	1.6451e-11
21.66	1.60642e-11	1.64559e-11
21.68	1.60622e-11	1.6456e-11
21.7	1.60572e-11	1.64485e-11
21.72	1.60604e-11	1.64505e-11
21.74	1.60587e-11	1.64513e-11
21.76	1.60605e-11	1.64471e-11
21.78	1.60629e-11	1.64501e-11
21.8	1.60642e-11	1.64546e-11
21.82	1.60618e-11	1.64543e-11
21.84	1.6063e-11	1.64593e-11
21.86	1.6055e-11	1.64487e-11
21.88	1.6064e-11	1.64537e-11
21.9	1.60597e-11	1.64539e-11
21.92	1.60541e-11	1.64589e-11
21.94	1.60522e-11	1.64566e-11
21.96	1.60505e-11	1.64605e-11
21.98	1.60587e-11	1.64491e-11
22	1.60588e-11	1.64522e-11
22.02	1.60655e-11	1.64529e-11
22.04	1.60652e-11	1.64471e-11
22.06	1.60746e-11	1.64501e-11
22.08	1.6063e-11	1.64474e-11
22.1	1.60612e-11	1.64462e-11
22.12	1.60618e-11	1.64606e-11
22.14	1.6059e-11	1.64618e-11
22.16	1.60579e-11	1.64541e-11
22.18	1.60572e-11	1.64599e-11
22.2	1.60624e-11	1.64545e-11
22.22	1.60671e-11	1.64577e-11
22.24	1.60615e-11	1.64555e-11
22.26	1.60696e-11	1.64423e-11
22.28	1.60663e-11	1.64454e-11
22.3	1.60623e-11	1.6445e-11
22.32	1.60656e-11	1.64462e-11
22.34	1.60646e-11	1.6463e-11
22.36	1.60631e-11	1.64538e-11
22.38	1.60605e-11	1.64471e-11
22.4	1.60526e-11	1.64637e-11
22.42	1.60588e-11	1.64576e-11
22.44	1.60548e-11	1.64605e-11
22.46	1.60577e-11	1.64553e-11
22.48	1.60585e-11	1.64501e-11
22.5	1.60529e-11	1.64502e-11
22.52	1.60524e-11	1.64513e-11
22.54	1.60537e-11	1.64529e-11
22.56	1.60594e-11	1.64494e-11
22.58	1.60687e-11	1.64615e-11
22.6	1.60563e-11	1.64636e-11
22.62	1.60684e-11	1.64583e-11
22.64	1.60647e-11	1.64518e-11
22.66	1.60654e-11	1.64476e-11
22.68	1.60694e-11	1.64553e-11
22.7	1.60543e-11	1.64501e-11
22.72	1.60619e-11	1.64543e-11
22.74	1.60669e-11	1.64453e-11
22.76	1.60577e-11	1.64466e-11
22.78	1.60518e-11	1.64529e-11
22.8	1.60634e-11	1.64556e-11
22.82	1.60578e-11	1.64484e-11
22.84	1.60554e-11	1.64527e-11
22.86	1.60589e-11	1.64554e-11
22.88	1.60732e-11	1.64584e-11
22.9	1.6069e-11	1.64514e-11
22.92	1.6069e-11	1.64461e-11
22.94	1.60579e-11	1.64529e-11
22.96	1.60658e-11	1.64482e-11
22.98	1.6066e-11	1.64581e-11
23	1.60603e-11	1.64562e-11
23.02	1.60608e-11	1.64518e-11
23.04	1.60546e-11	1.64624e-11
23.06	1.60559e-11	1.64549e-11
23.08	1.606e-11	1.64564e-11
23.1	1.60634e-11	1.64507e-11
23.12	1.60697e-11	1.64552e-11
23.14	1.60658e-11	1.64549e-11
23.16	1.60592e-11	1.64612e-11
23.18	1.60533e-11	1.64393e-11
23.2	1.60657e-11	1.64517e-11
23.22	1.60797e-11	1.64496e-11
23.24	1.60722e-11	1.64522e-11
23.26	1.6071e-11	1.64555e-11
23.28	1.60683e-11	1.64463e-11
23.3	1.60708e-11	1.64548e-11
23.32	1.60706e-11	1.64497e-11
23.34	1.60723e-11	1.64533e-11
23.36	1.60676e-11	1.64477e-11
23.38	1.60695e-11	1.64535e-11
23.4	1.60664e-11	1.64518e-11
23.42	1.60667e-11	1.64546e-11
23.44	1.60648e-11	1.64567e-11
23.46	1.60692e-11	1.64551e-11
23.48	1.60644e-11	1.64568e-11
23.5	1.60632e-11	1.64641e-11
23.52	1.60707e-11	1.64602e-11
23.54	1.60732e-11	1.6454e-11
23.56	1.60764e-11	1.64591e-11
23.58	1.60782e-11	1.64619e-11
23.6	1.60766e-11	1.64606e-11
23.62	1.60721e-11	1.64591e-11
23.64	1.60706e-11	1.64649e-11
23.66	1.60668e-11	1.64656e-11
23.68	1.60685e-11	1.64655e-11
23.7	1.60659e-11	1.64615e-11
23.72	1.60653e-11	1.6462e-11
23.74	1.60596e-11	1.64635e-11
23.76	1.60741e-11	1.64569e-11
23.78	1.60672e-11	1.6459e-11
23.8	1.60654e-11	1.64556e-11
23.82	1.60734e-11	1.64566e-11
23.84	1.60663e-11	1.64624e-11
23.86	1.60672e-11	1.64546e-11
23.88	1.60671e-11	1.64621e-11
23.9	1.60656e-11	1.64584e-11
23.92	1.60669e-11	1.64549e-11
23.94	1.60764e-11	1.64628e-11
23.96	1.60691e-11	1.64589e-11
23.98	1.60763e-11	1.64531e-11
24	1.60811e-11	1.64512e-11
24.02	1.60662e-11	1.6468e-11
24.04	1.60623e-11	1.64623e-11
24.06	1.60701e-11	1.64585e-11
24.08	1.60633e-11	1.6459e-11
24.1	1.60713e-11	1.64637e-11
24.12	1.60706e-11	1.64586e-11
24.14	1.60697e-11	1.64624e-11
24.16	1.60748e-11	1.64559e-11
24.18	1.60634e-11	1.64706e-11
24.2	1.60643e-11	1.64617e-11
24.22	1.60712e-11	1.64565e-11
24.24	1.60728e-11	1.64606e-11
24.26	1.60668e-11	1.6465e-11
24.28	1.60783e-11	1.64705e-11
24.3	1.60764e-11	1.64644e-11
24.32	1.60659e-11	1.64663e-11
24.34	1.6071e-11	1.64666e-11
24.36	1.60625e-11	1.64647e-11
24.38	1.60721e-11	1.64648e-11
24.4	1.60751e-11	1.64657e-11
24.42	1.60699e-11	1.64682e-11
24.44	1.60747e-11	1.64627e-11
24.46	1.60732e-11	1.64627e-11
24.48	1.60739e-11	1.64673e-11
24.5	1.60696e-11	1.64647e-11
24.52	1.60773e-11	1.64692e-11
24.54	1.60693e-11	1.64619e-11
24.56	1.60735e-11	1.6462e-11
24.58	1.60741e-11	1.64691e-11
24.6	1.60792e-11	1.64512e-11
24.62	1.60737e-11	1.64581e-11
24.64	1.60775e-11	1.6457e-11
24.66	1.60725e-11	1.64688e-11
24.68	1.60756e-11	1.64605e-11
24.7	1.60719e-11	1.64641e-11
24.72	1.60797e-11	1.64554e-11
24.74	1.60747e-11	1.64656e-11
24.76	1.60826e-11	1.64581e-11
24.78	1.60715e-11	1.64637e-11
24.8	1.60828e-11	1.64691e-11
24.82	1.60683e-11	1.64702e-11
24.84	1.60741e-11	1.64555e-11
24.86	1.60691e-11	1.64623e-11
24.88	1.60774e-11	1.64597e-11
24.9	1.60711e-11	1.64665e-11
24.92	1.60725e-11	1.64585e-11
24.94	1.60713e-11	1.64621e-11
24.96	1.60757e-11	1.64584e-11
24.98	1.60716e-11	1.64576e-11
25	1.60795e-11	1.64646e-11
25.02	1.60708e-11	1.6459e-11
25.04		1.64656e-11
25.06		1.64623e-11
25.08		1.64642e-11
25.1		1.64621e-11
25.12		1.6465e-11
25.14		1.64653e-11
25.16		1.64649e-11
25.18		1.64653e-11
25.2		1.64574e-11
25.22		1.64644e-11
25.24		1.64656e-11
25.26		1.64645e-11
25.28		1.64647e-11
25.3		1.64659e-11
25.32		1.64692e-11
25.34		1.64721e-11
25.36		1.6465e-11
25.38		1.64722e-11
25.4		1.64723e-11
25.42		1.64713e-11
25.44		1.64705e-11
25.46		1.64731e-11
25.48		1.64686e-11
25.5		1.64659e-11
25.52		1.64708e-11
25.54		1.6463e-11
25.56		1.64657e-11
25.58		1.64752e-11
25.6		1.64769e-11
25.62		1.64708e-11
25.64		1.64766e-11
25.66		1.64736e-11
25.68		1.64701e-11
25.7		1.64657e-11
25.72		1.6469e-11
25.74		1.64581e-11
25.76		1.64532e-11
25.78		1.64533e-11
25.8		1.64613e-11
25.82		1.6462e-11
25.84		1.64655e-11
25.86		1.64637e-11
25.88		1.64655e-11
25.9		1.64586e-11
25.92		1.64601e-11
25.94		1.64572e-11
25.96		1.64597e-11
25.98		1.64584e-11
26		1.64571e-11
26.02		1.64529e-11
26.04		1.64452e-11
26.06		1.64624e-11
26.08		1.64628e-11
26.1		1.64672e-11
26.12		1.6469e-11
26.14		1.64739e-11
26.16		1.64677e-11
26.18		1.64743e-11
26.2		1.64715e-11
26.22		1.64767e-11
26.24		1.64716e-11
26.26		1.64716e-11
26.28		1.6469e-11
26.3		1.64698e-11
26.32		1.64784e-11
26.34		1.64792e-11
26.36		1.64749e-11
26.38		1.64759e-11
26.4		1.64735e-11
26.42		1.64727e-11
26.44		1.6478e-11
26.46		1.64857e-11
26.48		1.64826e-11
26.5		1.64756e-11
26.52		1.64747e-11
26.54		1.64828e-11
26.56		1.64741e-11
26.58		1.64784e-11
26.6		1.64857e-11
26.62		1.64837e-11
26.64		1.64828e-11
26.66		1.6477e-11
26.68		1.64805e-11
26.7		1.64861e-11
26.72		1.64747e-11
26.74		1.64799e-11
26.76		1.64818e-11
26.78		1.64835e-11
26.8		1.64706e-11
26.82		1.64676e-11
26.84		1.64672e-11
26.86		1.6476e-11
26.88		1.64789e-11
26.9		1.64787e-11
26.92		1.64726e-11
26.94		1.64779e-11
26.96		1.64816e-11
26.98		1.64791e-11
27		1.64759e-11
27.02		1.64718e-11
27.04		1.64723e-11
27.06		1.64757e-11
27.08		1.64744e-11
27.1		1.64756e-11
27.12		1.64663e-11
27.14		1.64772e-11
27.16		1.64683e-11
27.18		1.64728e-11
27.2		1.64769e-11
27.22		1.64702e-11
27.24		1.64787e-11
27.26		1.64742e-11
27.28		1.6469e-11
27.3		1.64722e-11
27.32		1.64781e-11
27.34		1.64747e-11
27.36		1.64762e-11
27.38		1.64698e-11
27.4		1.64774e-11
27.42		1.64791e-11
27.44		1.64726e-11
27.46		1.64839e-11
27.48		1.6477e-11
27.5		1.64802e-11
27.52		1.64746e-11
27.54		1.64845e-11
27.56		1.64783e-11
27.58		1.64913e-11
27.6		1.64794e-11
27.62		1.64772e-11
27.64		1.64853e-11
27.66		1.64798e-11
27.68		1.64693e-11
27.7		1.64699e-11
27.72		1.64709e-11
27.74		1.64733e-11
27.76		1.64698e-11
27.78		1.64717e-11
27.8		1.6474e-11
27.82		1.64772e-11
27.84		1.64736e-11
27.86		1.64745e-11
27.88		1.64835e-11
27.9		1.64868e-11
27.92		1.64776e-11
27.94		1.64792e-11
27.96		1.64843e-11
27.98		1.6489e-11
28		1.64905e-11
28.02		1.64852e-11
28.04		1.64855e-11
28.06		1.64862e-11
28.08		1.64868e-11
28.1		1.64845e-11
28.12		1.64818e-11
28.14		1.64871e-11
28.16		1.64846e-11
28.18		1.64793e-11
28.2		1.64843e-11
28.22		1.64835e-11
28.24		1.64885e-11
28.26		1.64841e-11
28.28		1.64848e-11
28.3		1.6489e-11
28.32		1.64875e-11
28.34		1.6485e-11
28.36		1.64755e-11
28.38		1.6477e-11
28.4		1.64796e-11
28.42		1.64784e-11
28.44		1.6481e-11
28.46		1.64779e-11
28.48		1.64834e-11
28.5		1.64694e-11
28.52		1.64711e-11
28.54		1.64746e-11
28.56		1.64784e-11
28.58		1.64746e-11
28.6		1.64712e-11
28.62		1.64864e-11
28.64		1.64835e-11
28.66		1.6481e-11
28.68		1.64831e-11
28.7		1.64765e-11
28.72		1.64709e-11
28.74		1.64796e-11
28.76		1.64787e-11
28.78		1.64829e-11
28.8		1.64911e-11
28.82		1.64835e-11
28.84		1.64856e-11
28.86		1.6481e-11
28.88		1.6481e-11
28.9		1.64839e-11
28.92		1.64832e-11
28.94		1.64851e-11
28.96		1.64837e-11
28.98		1.64812e-11
29		1.64818e-11
29.02		1.64822e-11
29.04		1.64799e-11
29.06		1.64848e-11
29.08		1.64807e-11
29.1		1.64804e-11
29.12		1.64847e-11
29.14		1.64847e-11
29.16		1.64912e-11
29.18		1.6484e-11
29.2		1.64876e-11
29.22		1.64888e-11
29.24		1.64819e-11
29.26		1.6484e-11
29.28		1.649e-11
29.3		1.64852e-11
29.32		1.64848e-11
29.34		1.64882e-11
29.36		1.64964e-11
29.38		1.64954e-11
29.4		1.64881e-11
29.42		1.64788e-11
29.44		1.64819e-11
29.46		1.64897e-11
29.48		1.64938e-11
29.5		1.6484e-11
29.52		1.6487e-11
29.54		1.64849e-11
29.56		1.64852e-11
29.58		1.64862e-11
29.6		1.64867e-11
29.62		1.64857e-11
29.64		1.64894e-11
29.66		1.64911e-11
29.68		1.64925e-11
29.7		1.64912e-11
29.72		1.64843e-11
29.74		1.64875e-11
29.76		1.64874e-11
29.78		1.64889e-11
29.8		1.64845e-11
29.82		1.64923e-11
29.84		1.64844e-11
29.86		1.64901e-11
29.88		1.64932e-11
29.9		1.64929e-11
29.92		1.64905e-11
29.94		1.64773e-11
29.96		1.64868e-11
29.98		1.6486e-11
30		1.64852e-11
30.02		1.64891e-11
30.04		1.64822e-11
30.06		1.64796e-11
30.08		1.64815e-11
30.1		1.64863e-11
30.12		1.64878e-11
30.14		1.64855e-11
30.16		1.64956e-11
30.18		1.64904e-11
30.2		1.64954e-11
30.22		1.64918e-11
30.24		1.64928e-11
30.26		1.64814e-11
30.28		1.64903e-11
30.3		1.64922e-11
30.32		1.64934e-11
30.34		1.64867e-11
30.36		1.64856e-11
30.38		1.64911e-11
30.4		1.64858e-11
30.42		1.64851e-11
30.44		1.64819e-11
30.46		1.64774e-11
30.48		1.64776e-11
30.5		1.6486e-11
30.52		1.64878e-11
30.54		1.64793e-11
30.56		1.64858e-11
30.58		1.6476e-11
30.6		1.64783e-11
30.62		1.64948e-11
30.64		1.64833e-11
30.66		1.64879e-11
30.68		1.64813e-11
30.7		1.64858e-11
30.72		1.64904e-11
30.74		1.64842e-11
30.76		1.64796e-11
30.78		1.64858e-11
30.8		1.64797e-11
30.82		1.64825e-11
30.84		1.64775e-11
30.86		1.64837e-11
30.88		1.64863e-11
30.9		1.64913e-11
30.92		1.64862e-11
30.94		1.64881e-11
30.96		1.64908e-11
30.98		1.64874e-11
31		1.64913e-11
31.02		1.64839e-11
31.04		1.64924e-11
31.06		1.64928e-11
31.08		1.64899e-11
31.1		1.64937e-11
31.12		1.64976e-11
31.14		1.64979e-11
31.16		1.64907e-11
31.18		1.64832e-11
31.2		1.6487e-11
31.22		1.64923e-11
31.24		1.64936e-11
31.26		1.64922e-11
31.28		1.64912e-11
31.3		1.6483e-11
31.32		1.64978e-11
31.34		1.64902e-11
31.36		1.64916e-11
31.38		1.64911e-11
31.4		1.64902e-11
31.42		1.64908e-11
31.44		1.64965e-11
31.46		1.64949e-11
31.48		1.64866e-11
31.5		1.64913e-11
31.52		1.64875e-11
31.54		1.64886e-11
31.56		1.64816e-11
31.58		1.6488e-11
31.6		1.64881e-11
31.62		1.64874e-11
31.64		1.64796e-11
31.66		1.64911e-11
31.68		1.64925e-11
31.7		1.64925e-11
31.72		1.64839e-11
31.74		1.64902e-11
31.76		1.64928e-11
31.78		1.64888e-11
31.8		1.64851e-11
31.82		1.64896e-11
31.84		1.64919e-11
31.86		1.64886e-11
31.88		1.64869e-11
31.9		1.64905e-11
31.92		1.64805e-11
31.94		1.64868e-11
31.96		1.64852e-11
31.98		1.64838e-11
32		1.64824e-11
32.02		1.6485e-11
32.04		1.64906e-11
32.06		1.64831e-11
32.08		1.64897e-11
32.1		1.64909e-11
32.12		1.64932e-11
32.14		1.64936e-11
32.16		1.64753e-11
32.18		1.64827e-11
32.2		1.64848e-11
32.22		1.64935e-11
32.24		1.64879e-11
32.26		1.64859e-11
32.28		1.64864e-11
32.3		1.6485e-11
32.32		1.64955e-11
32.34		1.64917e-11
32.36		1.64924e-11
32.38		1.64908e-11
32.4		1.64835e-11
32.42		1.64931e-11
32.44		1.64948e-11
32.46		1.64951e-11
32.48		1.649e-11
32.5		1.64934e-11
32.52		1.6491e-11
32.54		1.64968e-11
32.56		1.64973e-11
32.58		1.64974e-11
32.6		1.64955e-11
32.62		1.65004e-11
32.64		1.65028e-11
32.66		1.6502e-11
32.68		1.64923e-11
32.7		1.64948e-11
32.72		1.64974e-11
32.74		1.64975e-11
32.76		1.6496e-11
32.78		1.64969e-11
32.8		1.64954e-11
32.82		1.64971e-11
32.84		1.65045e-11
32.86		1.64794e-11
32.88		1.64909e-11
32.9		1.65051e-11
32.92		1.64991e-11
32.94		1.64883e-11
32.96		1.65001e-11
32.98		1.64933e-11
33		1.64999e-11
33.02		1.65015e-11
33.04		1.65033e-11
33.06		1.64948e-11
33.08		1.64923e-11
33.1		1.64937e-11
33.12		1.64978e-11
33.14		1.64927e-11
33.16		1.64916e-11
33.18		1.64883e-11
33.2		1.64933e-11
33.22		1.65039e-11
33.24		1.65058e-11
33.26		1.64956e-11
33.28		1.65006e-11
33.3		1.64953e-11
33.32		1.65052e-11
33.34		1.65008e-11
33.36		1.65043e-11
33.38		1.65056e-11
33.4		1.65026e-11
33.42		1.65011e-11
33.44		1.64951e-11
33.46		1.65016e-11
33.48		1.64935e-11
33.5		1.64967e-11
33.52		1.6493e-11
33.54		1.64922e-11
33.56		1.65019e-11
33.58		1.64984e-11
33.6		1.65061e-11
33.62		1.65035e-11
33.64		1.64989e-11
33.66		1.65013e-11
33.68		1.64967e-11
33.7		1.65003e-11
33.72		1.6501e-11
33.74		1.65019e-11
33.76		1.65024e-11
33.78		1.65079e-11
33.8		1.65005e-11
33.82		1.64954e-11
33.84		1.65022e-11
33.86		1.64996e-11
33.88		1.64955e-11
33.9		1.65026e-11
33.92		1.64943e-11
33.94		1.65022e-11
33.96		1.64932e-11
33.98		1.64953e-11
34		1.65011e-11
34.02		1.64949e-11
34.04		1.64988e-11
34.06		1.64953e-11
34.08		1.65024e-11
34.1		1.65056e-11
34.12		1.65004e-11
34.14		1.64993e-11
34.16		1.65059e-11
34.18		1.65053e-11
34.2		1.65043e-11
34.22		1.65033e-11
34.24		1.64978e-11
34.26		1.65001e-11
34.28		1.6495e-11
34.3		1.64992e-11
34.32		1.64925e-11
34.34		1.64882e-11
34.36		1.65034e-11
34.38		1.6503e-11
34.4		1.65048e-11
34.42		1.64982e-11
34.44		1.65001e-11
34.46		1.65075e-11
34.48		1.64963e-11
34.5		1.65031e-11
34.52		1.65e-11
34.54		1.64925e-11
34.56		1.65066e-11
34.58		1.64937e-11
34.6		1.64917e-11
34.62		1.64962e-11
34.64		1.64938e-11
34.66		1.65034e-11
34.68		1.64917e-11
34.7		1.64836e-11
34.72		1.64968e-11
34.74		1.64861e-11
34.76		1.64886e-11
34.78		1.64929e-11
34.8		1.64901e-11
34.82		1.64973e-11
34.84		1.64861e-11
34.86		1.64955e-11
34.88		1.65037e-11
34.9		1.64988e-11
34.92		1.65098e-11
34.94		1.64993e-11
34.96		1.64895e-11
34.98		1.64929e-11
35		1.64916e-11
35.02		1.6493e-11
35.04		1.64927e-11
35.06		1.64951e-11
35.08		1.64962e-11
35.1		1.6493e-11
35.12		1.64977e-11
35.14		1.64943e-11
35.16		1.65032e-11
35.18		1.65021e-11
35.2		1.65109e-11
35.22		1.65089e-11
35.24		1.65026e-11
35.26		1.64999e-11
35.28		1.64996e-11
35.3		1.65016e-11
35.32		1.65021e-11
35.34		1.65101e-11
35.36		1.65082e-11
35.38		1.651e-11
35.4		1.64984e-11
35.42		1.65025e-11
35.44		1.65117e-11
35.46		1.65116e-11
35.48		1.65106e-11
35.5		1.65122e-11
35.52		1.65083e-11
35.54		1.65032e-11
35.56		1.65092e-11
35.58		1.65011e-11
35.6		1.65059e-11
35.62		1.65072e-11
35.64		1.65016e-11
35.66		1.65119e-11
35.68		1.65177e-11
35.7		1.65086e-11
35.72		1.65091e-11
35.74		1.6509e-11
35.76		1.65002e-11
35.78		1.65126e-11
35.8		1.65073e-11
35.82		1.65092e-11
35.84		1.65087e-11
35.86		1.65068e-11
35.88		1.64996e-11
35.9		1.65029e-11
35.92		1.65003e-11
35.94		1.64983e-11
35.96		1.64988e-11
35.98		1.64998e-11
36		1.6503e-11
36.02		1.64917e-11
36.04		1.64943e-11
36.06		1.64985e-11
36.08		1.6506e-11
36.1		1.65058e-11
36.12		1.65069e-11
36.14		1.65e-11
36.16		1.64871e-11
36.18		1.65089e-11
36.2		1.65094e-11
36.22		1.65105e-11
36.24		1.65167e-11
36.26		1.6516e-11
36.28		1.65174e-11
36.3		1.65175e-11
36.32		1.65155e-11
36.34		1.65149e-11
36.36		1.65027e-11
36.38		1.65063e-11
36.4		1.65106e-11
36.42		1.64986e-11
36.44		1.65087e-11
36.46		1.65032e-11
36.48		1.65006e-11
36.5		1.65068e-11
36.52		1.6507e-11
36.54		1.65086e-11
36.56		1.65108e-11
36.58		1.65021e-11
36.6		1.65011e-11
36.62		1.65086e-11
36.64		1.65016e-11
36.66		1.65139e-11
36.68		1.65016e-11
36.7		1.65122e-11
36.72		1.6507e-11
36.74		1.65153e-11
36.76		1.65088e-11
36.78		1.65077e-11
36.8		1.65167e-11
36.82		1.65088e-11
36.84		1.6508e-11
36.86		1.65061e-11
36.88		1.65033e-11
36.9		1.65046e-11
36.92		1.64941e-11
36.94		1.65072e-11
36.96		1.65014e-11
36.98		1.65057e-11
37		1.65013e-11
37.02		1.64986e-11
37.04		1.65054e-11
37.06		1.65048e-11
37.08		1.65075e-11
37.1		1.65142e-11
37.12		1.6511e-11
37.14		1.65087e-11
37.16		1.65015e-11
37.18		1.65069e-11
37.2		1.65168e-11
37.22		1.65139e-11
37.24		1.6511e-11
37.26		1.65016e-11
37.28		1.65064e-11
37.3		1.65087e-11
37.32		1.65048e-11
37.34		1.65112e-11
37.36		1.65128e-11
37.38		1.65051e-11
37.4		1.65151e-11
37.42		1.65142e-11
37.44		1.65148e-11
37.46		1.65172e-11
37.48		1.65185e-11
37.5		1.65106e-11
37.52		1.65183e-11
37.54		1.65022e-11
37.56		1.65064e-11
37.58		1.65073e-11
37.6		1.65117e-11
37.62		1.64996e-11
37.64		1.65098e-11
37.66		1.65052e-11
37.68		1.65221e-11
37.7		1.65059e-11
37.72		1.6514e-11
37.74		1.65047e-11
37.76		1.65067e-11
37.78		1.6517e-11
37.8		1.65137e-11
37.82		1.65106e-11
37.84		1.65085e-11
37.86		1.65097e-11
37.88		1.65092e-11
37.9		1.65166e-11
37.92		1.65178e-11
37.94		1.65094e-11
37.96		1.65148e-11
37.98		1.65253e-11
38		1.65186e-11
38.02		1.65114e-11
38.04		1.65067e-11
38.06		1.65098e-11
38.08		1.65092e-11
38.1		1.65214e-11
38.12		1.65152e-11
38.14		1.65125e-11
38.16		1.65105e-11
38.18		1.65145e-11
38.2		1.65023e-11
38.22		1.65116e-11
38.24		1.6517e-11
38.26		1.65137e-11
38.28		1.65123e-11
38.3		1.65139e-11
38.32		1.65125e-11
38.34		1.65126e-11
38.36		1.65064e-11
38.38		1.65031e-11
38.4		1.65112e-11
38.42		1.651e-11
38.44		1.65064e-11
38.46		1.65085e-11
38.48		1.65045e-11
38.5		1.65098e-11
38.52		1.65087e-11
38.54		1.65167e-11
38.56		1.65059e-11
38.58		1.65144e-11
38.6		1.6517e-11
38.62		1.65104e-11
38.64		1.65135e-11
38.66		1.65155e-11
38.68		1.65066e-11
38.7		1.65112e-11
38.72		1.65125e-11
38.74		1.65057e-11
38.76		1.65068e-11
38.78		1.65069e-11
38.8		1.65082e-11
38.82		1.65114e-11
38.84		1.65121e-11
38.86		1.65079e-11
38.88		1.65072e-11
38.9		1.65042e-11
38.92		1.65076e-11
38.94		1.65061e-11
38.96		1.65164e-11
38.98		1.65141e-11
39		1.65141e-11
39.02		1.65161e-11
39.04		1.65142e-11
39.06		1.65166e-11
39.08		1.65116e-11
39.1		1.65065e-11
39.12		1.65162e-11
39.14		1.65197e-11
39.16		1.6515e-11
39.18		1.65151e-11
39.2		1.65179e-11
39.22		1.6515e-11
39.24		1.65201e-11
39.26		1.6518e-11
39.28		1.65125e-11
39.3		1.65133e-11
39.32		1.65113e-11
39.34		1.65119e-11
39.36		1.65095e-11
39.38		1.65072e-11
39.4		1.6511e-11
39.42		1.65053e-11
39.44		1.65017e-11
39.46		1.65142e-11
39.48		1.65094e-11
39.5		1.65131e-11
39.52		1.65162e-11
39.54		1.65137e-11
39.56		1.65091e-11
39.58		1.65038e-11
39.6		1.65095e-11
39.62		1.65142e-11
39.64		1.65079e-11
39.66		1.65157e-11
39.68		1.65095e-11
39.7		1.65153e-11
39.72		1.65157e-11
39.74		1.65189e-11
39.76		1.65135e-11
39.78		1.65173e-11
39.8		1.65122e-11
39.82		1.65214e-11
39.84		1.65137e-11
39.86		1.65183e-11
39.88		1.65107e-11
39.9		1.65175e-11
39.92		1.65117e-11
39.94		1.65171e-11
39.96		1.65198e-11
[truncated: 4,002 more rows]

## Sheet: 16930091-095.abf
	Cm(F)
time (ms)	100uM 5-HT	100uM cocaine
0.02	2.01462e-11	2.02987e-11
0.04	2.01448e-11	2.02999e-11
0.06	2.01444e-11	2.02963e-11
0.08	2.01462e-11	2.03061e-11
0.1	2.01458e-11	2.02975e-11
0.12	2.01516e-11	2.03003e-11
0.14	2.01468e-11	2.03031e-11
0.16	2.01466e-11	2.03005e-11
0.18	2.01476e-11	2.03014e-11
0.2	2.01429e-11	2.02934e-11
0.22	2.01387e-11	2.0303e-11
0.24	2.0141e-11	2.03039e-11
0.26	2.01473e-11	2.02982e-11
0.28	2.0142e-11	2.03045e-11
0.3	2.01496e-11	2.02948e-11
0.32	2.0143e-11	2.03044e-11
0.34	2.01416e-11	2.03036e-11
0.36	2.01497e-11	2.02961e-11
0.38	2.01445e-11	2.02922e-11
0.4	2.01414e-11	2.02935e-11
0.42	2.01416e-11	2.03006e-11
0.44	2.01475e-11	2.03073e-11
0.46	2.0146e-11	2.03028e-11
0.48	2.01486e-11	2.03032e-11
0.5	2.01493e-11	2.03086e-11
0.52	2.01467e-11	2.03071e-11
0.54	2.01428e-11	2.03004e-11
0.56	2.01446e-11	2.03013e-11
0.58	2.01423e-11	2.0299e-11
0.6	2.01452e-11	2.02984e-11
0.62	2.01458e-11	2.03014e-11
0.64	2.01426e-11	2.02971e-11
0.66	2.01433e-11	2.02962e-11
0.68	2.01434e-11	2.03035e-11
0.7	2.01452e-11	2.02984e-11
0.72	2.01503e-11	2.0301e-11
0.74	2.01453e-11	2.02971e-11
0.76	2.01433e-11	2.03012e-11
0.78	2.01503e-11	2.02919e-11
0.8	2.01429e-11	2.03044e-11
0.82	2.01439e-11	2.02987e-11
0.84	2.01453e-11	2.0308e-11
0.86	2.01457e-11	2.02957e-11
0.88	2.01456e-11	2.03025e-11
0.9	2.01506e-11	2.02977e-11
0.92	2.01447e-11	2.03012e-11
0.94	2.0148e-11	2.02997e-11
0.96	2.0147e-11	2.02997e-11
0.98	2.01489e-11	2.02989e-11
1	2.01518e-11	2.03021e-11
1.02	2.01469e-11	2.02948e-11
1.04	2.01433e-11	2.02941e-11
1.06	2.01491e-11	2.02997e-11
1.08	2.01484e-11	2.03049e-11
1.1	2.01509e-11	2.02994e-11
1.12	2.01482e-11	2.03071e-11
1.14	2.01501e-11	2.0302e-11
1.16	2.01549e-11	2.03017e-11
1.18	2.01458e-11	2.0298e-11
1.2	2.01545e-11	2.02996e-11
1.22	2.01526e-11	2.02925e-11
1.24	2.01527e-11	2.03015e-11
1.26	2.01482e-11	2.03024e-11
1.28	2.01501e-11	2.03015e-11
1.3	2.01474e-11	2.02974e-11
1.32	2.01448e-11	2.02946e-11
1.34	2.01462e-11	2.03052e-11
1.36	2.01539e-11	2.03007e-11
1.38	2.01515e-11	2.02975e-11
1.4	2.0152e-11	2.02946e-11
1.42	2.01564e-11	2.02972e-11
1.44	2.01525e-11	2.02988e-11
1.46	2.01475e-11	2.02925e-11
1.48	2.01532e-11	2.03018e-11
1.5	2.01535e-11	2.03e-11
1.52	2.01528e-11	2.03021e-11
1.54	2.01462e-11	2.03008e-11
1.56	2.01498e-11	2.03076e-11
1.58	2.01496e-11	2.03005e-11
1.6	2.01482e-11	2.02985e-11
1.62	2.01554e-11	2.03017e-11
1.64	2.01538e-11	2.0303e-11
1.66	2.01524e-11	2.02967e-11
1.68	2.01413e-11	2.02996e-11
1.7	2.01499e-11	2.02995e-11
1.72	2.01502e-11	2.03043e-11
1.74	2.01459e-11	2.03027e-11
1.76	2.01499e-11	2.03049e-11
1.78	2.0161e-11	2.03058e-11
1.8	2.01553e-11	2.02995e-11
1.82	2.0146e-11	2.02988e-11
1.84	2.01561e-11	2.0303e-11
1.86	2.01505e-11	2.03025e-11
1.88	2.01525e-11	2.02986e-11
1.9	2.01486e-11	2.03064e-11
1.92	2.01515e-11	2.03047e-11
1.94	2.01534e-11	2.03044e-11
1.96	2.015e-11	2.0303e-11
1.98	2.01497e-11	2.0297e-11
2	2.01471e-11	2.03058e-11
2.02	2.01458e-11	2.03042e-11
2.04	2.01509e-11	2.03044e-11
2.06	2.01543e-11	2.02969e-11
2.08	2.01535e-11	2.03013e-11
2.1	2.01521e-11	2.02999e-11
2.12	2.0153e-11	2.03045e-11
2.14	2.01548e-11	2.03061e-11
2.16	2.01468e-11	2.02948e-11
2.18	2.01485e-11	2.03023e-11
2.2	2.01472e-11	2.03011e-11
2.22	2.01507e-11	2.03034e-11
2.24	2.01506e-11	2.03013e-11
2.26	2.01494e-11	2.02988e-11
2.28	2.0152e-11	2.03037e-11
2.3	2.01519e-11	2.03016e-11
2.32	2.01563e-11	2.03001e-11
2.34	2.01518e-11	2.03042e-11
2.36	2.01532e-11	2.0306e-11
2.38	2.01476e-11	2.03044e-11
2.4	2.01498e-11	2.03018e-11
2.42	2.01505e-11	2.03038e-11
2.44	2.01544e-11	2.03043e-11
2.46	2.01525e-11	2.03013e-11
2.48	2.0156e-11	2.02991e-11
2.5	2.01589e-11	2.03057e-11
2.52	2.01531e-11	2.03036e-11
2.54	2.01552e-11	2.03022e-11
2.56	2.01554e-11	2.03019e-11
2.58	2.01529e-11	2.03042e-11
2.6	2.01576e-11	2.03053e-11
2.62	2.01519e-11	2.03003e-11
2.64	2.01543e-11	2.03034e-11
2.66	2.01548e-11	2.03031e-11
2.68	2.01483e-11	2.03004e-11
2.7	2.01546e-11	2.03002e-11
2.72	2.01587e-11	2.03082e-11
2.74	2.01544e-11	2.03039e-11
2.76	2.01544e-11	2.02988e-11
2.78	2.01571e-11	2.03014e-11
2.8	2.0151e-11	2.03051e-11
2.82	2.01502e-11	2.03088e-11
2.84	2.01517e-11	2.03025e-11
2.86	2.01609e-11	2.02993e-11
2.88	2.01529e-11	2.03016e-11
2.9	2.01507e-11	2.03035e-11
2.92	2.01586e-11	2.03018e-11
2.94	2.01534e-11	2.03011e-11
2.96	2.01526e-11	2.03104e-11
2.98	2.01549e-11	2.02999e-11
3	2.01516e-11	2.03082e-11
3.02	2.01525e-11	2.03007e-11
3.04	2.01525e-11	2.03035e-11
3.06	2.01538e-11	2.02968e-11
3.08	2.01541e-11	2.03015e-11
3.1	2.01498e-11	2.03029e-11
3.12	2.01558e-11	2.03025e-11
3.14	2.01515e-11	2.03044e-11
3.16	2.0159e-11	2.03038e-11
3.18	2.01538e-11	2.0301e-11
3.2	2.01626e-11	2.03074e-11
3.22	2.01575e-11	2.0297e-11
3.24	2.01562e-11	2.02972e-11
3.26	2.01562e-11	2.03047e-11
3.28	2.01533e-11	2.03006e-11
3.3	2.01554e-11	2.03017e-11
3.32	2.01613e-11	2.03026e-11
3.34	2.01651e-11	2.02998e-11
3.36	2.01538e-11	2.03022e-11
3.38	2.01573e-11	2.03056e-11
3.4	2.0154e-11	2.03066e-11
3.42	2.01508e-11	2.03006e-11
3.44	2.01627e-11	2.03049e-11
3.46	2.01535e-11	2.03046e-11
3.48	2.01538e-11	2.03007e-11
3.5	2.01551e-11	2.02988e-11
3.52	2.01556e-11	2.03014e-11
3.54	2.01608e-11	2.03092e-11
3.56	2.01568e-11	2.02982e-11
3.58	2.01589e-11	2.03022e-11
3.6	2.01624e-11	2.03019e-11
3.62	2.0158e-11	2.03048e-11
3.64	2.01539e-11	2.03048e-11
3.66	2.01556e-11	2.03033e-11
3.68	2.01582e-11	2.02998e-11
3.7	2.01505e-11	2.03039e-11
3.72	2.01555e-11	2.03054e-11
3.74	2.01578e-11	2.03036e-11
3.76	2.01607e-11	2.03048e-11
3.78	2.01573e-11	2.02975e-11
3.8	2.015e-11	2.03088e-11
3.82	2.01519e-11	2.02991e-11
3.84	2.01531e-11	2.02981e-11
3.86	2.0153e-11	2.03022e-11
3.88	2.01523e-11	2.0301e-11
3.9	2.0159e-11	2.03019e-11
3.92	2.01564e-11	2.03037e-11
3.94	2.0161e-11	2.03e-11
3.96	2.01605e-11	2.02991e-11
3.98	2.01569e-11	2.03094e-11
4	2.01605e-11	2.03052e-11
4.02	2.01588e-11	2.03028e-11
4.04	2.01592e-11	2.03049e-11
4.06	2.01561e-11	2.03055e-11
4.08	2.01627e-11	2.03013e-11
4.1	2.01585e-11	2.03026e-11
4.12	2.01622e-11	2.03039e-11
4.14	2.01561e-11	2.03033e-11
4.16	2.01633e-11	2.03013e-11
4.18	2.01557e-11	2.03044e-11
4.2	2.01614e-11	2.03069e-11
4.22	2.01616e-11	2.03025e-11
4.24	2.01656e-11	2.03118e-11
4.26	2.01548e-11	2.03049e-11
4.28	2.01533e-11	2.03059e-11
4.3	2.01562e-11	2.03086e-11
4.32	2.01597e-11	2.03029e-11
4.34	2.01614e-11	2.0302e-11
4.36	2.0162e-11	2.03105e-11
4.38	2.01615e-11	2.03142e-11
4.4	2.01613e-11	2.03047e-11
4.42	2.01618e-11	2.0311e-11
4.44	2.01682e-11	2.0306e-11
4.46	2.01651e-11	2.03044e-11
4.48	2.01627e-11	2.03086e-11
4.5	2.0161e-11	2.03045e-11
4.52	2.01582e-11	2.03004e-11
4.54	2.01597e-11	2.0306e-11
4.56	2.01601e-11	2.03033e-11
4.58	2.01589e-11	2.03101e-11
4.6	2.01604e-11	2.02986e-11
4.62	2.01631e-11	2.0296e-11
4.64	2.01594e-11	2.02975e-11
4.66	2.01607e-11	2.03028e-11
4.68	2.01593e-11	2.03002e-11
4.7	2.01686e-11	2.03022e-11
4.72	2.01644e-11	2.02998e-11
4.74	2.01648e-11	2.03029e-11
4.76	2.01611e-11	2.03052e-11
4.78	2.01612e-11	2.03003e-11
4.8	2.01659e-11	2.03022e-11
4.82	2.01647e-11	2.03031e-11
4.84	2.0169e-11	2.03025e-11
4.86	2.01616e-11	2.03015e-11
4.88	2.01653e-11	2.02966e-11
4.9	2.01606e-11	2.03061e-11
4.92	2.01562e-11	2.03052e-11
4.94	2.01664e-11	2.03045e-11
4.96	2.01579e-11	2.03113e-11
4.98	2.01633e-11	2.03073e-11
5	2.01618e-11	2.03067e-11
5.02	2.01625e-11	2.03017e-11
5.04	2.01605e-11	2.0303e-11
5.06	2.01627e-11	2.0306e-11
5.08	2.01663e-11	2.03019e-11
5.1	2.01625e-11	2.03033e-11
5.12	2.01583e-11	2.03021e-11
5.14	2.01524e-11	2.03048e-11
5.16	2.00158e-11	2.03046e-11
5.18	2.00073e-11	2.0305e-11
5.2	2.0003e-11	2.03069e-11
5.22	2.00032e-11	2.03035e-11
5.24	2.00079e-11	2.03075e-11
5.26	2.00051e-11	2.0306e-11
5.28	2.00101e-11	2.03041e-11
5.3	2.00192e-11	2.03038e-11
5.32	2.00235e-11	2.03064e-11
5.34	2.00261e-11	2.03019e-11
5.36	2.00236e-11	2.03006e-11
5.38	2.00246e-11	2.03015e-11
5.4	2.00302e-11	2.02989e-11
5.42	2.00331e-11	2.03019e-11
5.44	2.00289e-11	2.02985e-11
5.46	2.00281e-11	2.03041e-11
5.48	2.00269e-11	2.03065e-11
5.5	2.00314e-11	2.03024e-11
5.52	2.00319e-11	2.03007e-11
5.54	2.00313e-11	2.02956e-11
5.56	2.00279e-11	2.03108e-11
5.58	2.00372e-11	2.03e-11
5.6	2.00324e-11	2.03099e-11
5.62	2.00307e-11	2.0302e-11
5.64	2.00327e-11	2.02999e-11
5.66	2.0032e-11	2.02982e-11
5.68	2.00319e-11	2.02998e-11
5.7	2.00315e-11	2.03004e-11
5.72	2.0031e-11	2.03052e-11
5.74	2.00275e-11	2.03022e-11
5.76	2.00279e-11	2.03039e-11
5.78	2.00313e-11	2.03051e-11
5.8	2.00351e-11	2.03056e-11
5.82	2.00383e-11	2.03e-11
5.84	2.00346e-11	2.0301e-11
5.86	2.00361e-11	2.03023e-11
5.88	2.00299e-11	2.03038e-11
5.9	2.0033e-11	2.03001e-11
5.92	2.00326e-11	2.03021e-11
5.94	2.00306e-11	2.03068e-11
5.96	2.00319e-11	2.03079e-11
5.98	2.00274e-11	2.02988e-11
6	2.00367e-11	2.03061e-11
6.02	2.00266e-11	2.03032e-11
6.04	2.00299e-11	2.02994e-11
6.06	2.00347e-11	2.03001e-11
6.08	2.00321e-11	2.03013e-11
6.1	2.00309e-11	2.03052e-11
6.12	2.00353e-11	2.03006e-11
6.14	2.00341e-11	2.0303e-11
6.16	2.00327e-11	2.02986e-11
6.18	2.00324e-11	2.03055e-11
6.2	2.0028e-11	2.03043e-11
6.22	2.0026e-11	2.03062e-11
6.24	2.00352e-11	2.03081e-11
6.26	2.00365e-11	2.03051e-11
6.28	2.003e-11	2.03038e-11
6.3	2.00316e-11	2.03053e-11
6.32	2.00326e-11	2.03046e-11
6.34	2.00376e-11	2.03015e-11
6.36	2.00353e-11	2.0308e-11
6.38	2.0034e-11	2.03048e-11
6.4	2.00328e-11	2.03024e-11
6.42	2.00343e-11	2.03028e-11
6.44	2.00373e-11	2.03055e-11
6.46	2.00333e-11	2.03083e-11
6.48	2.00367e-11	2.03138e-11
6.5	2.0029e-11	2.02792e-11
6.52	2.00343e-11	2.02038e-11
6.54	2.00339e-11	2.01631e-11
6.56	2.00329e-11	2.01508e-11
6.58	2.0028e-11	2.0146e-11
6.6	2.00351e-11	2.0148e-11
6.62	2.00354e-11	2.01476e-11
6.64	2.00339e-11	2.01532e-11
6.66	2.00325e-11	2.01623e-11
6.68	2.00381e-11	2.0166e-11
6.7	2.00279e-11	2.01626e-11
6.72	2.00323e-11	2.01648e-11
6.74	2.00362e-11	2.01634e-11
6.76	2.0031e-11	2.01573e-11
6.78	2.0029e-11	2.01644e-11
6.8	2.00253e-11	2.01646e-11
6.82	2.0034e-11	2.01707e-11
6.84	2.00302e-11	2.01696e-11
6.86	2.00333e-11	2.01709e-11
6.88	2.00283e-11	2.01685e-11
6.9	2.00287e-11	2.01699e-11
6.92	2.00336e-11	2.01763e-11
6.94	2.00318e-11	2.0175e-11
6.96	2.0033e-11	2.01717e-11
6.98	2.00336e-11	2.01748e-11
7	2.0034e-11	2.01725e-11
7.02	2.00274e-11	2.01708e-11
7.04	2.00306e-11	2.0175e-11
7.06	2.00321e-11	2.01772e-11
7.08	2.0035e-11	2.01762e-11
7.1	2.00335e-11	2.01763e-11
7.12	2.00297e-11	2.01744e-11
7.14	2.00316e-11	2.01802e-11
7.16	2.00309e-11	2.01771e-11
7.18	2.00271e-11	2.01745e-11
7.2	2.00315e-11	2.01727e-11
7.22	2.00334e-11	2.01734e-11
7.24	2.00341e-11	2.01744e-11
7.26	2.00306e-11	2.01778e-11
7.28	2.00327e-11	2.01745e-11
7.3	2.00352e-11	2.01773e-11
7.32	2.00345e-11	2.01716e-11
7.34	2.00285e-11	2.01785e-11
7.36	2.0033e-11	2.01794e-11
7.38	2.00349e-11	2.01797e-11
7.4	2.00336e-11	2.01776e-11
7.42	2.00376e-11	2.01787e-11
7.44	2.00354e-11	2.01757e-11
7.46	2.00393e-11	2.01749e-11
7.48	2.00359e-11	2.01815e-11
7.5	2.00348e-11	2.01783e-11
7.52	2.00416e-11	2.01822e-11
7.54	2.00309e-11	2.01753e-11
7.56	2.00373e-11	2.01801e-11
7.58	2.00329e-11	2.01796e-11
7.6	2.0042e-11	2.0184e-11
7.62	2.00366e-11	2.01786e-11
7.64	2.0031e-11	2.0179e-11
7.66	2.00357e-11	2.01823e-11
7.68	2.00319e-11	2.01829e-11
7.7	2.00313e-11	2.01786e-11
7.72	2.00329e-11	2.018e-11
7.74	2.00339e-11	2.01798e-11
7.76	2.0032e-11	2.01727e-11
7.78	2.0036e-11	2.01754e-11
7.8	2.00272e-11	2.01734e-11
7.82	2.00278e-11	2.01796e-11
7.84	2.00304e-11	2.018e-11
7.86	2.00399e-11	2.01668e-11
7.88	2.00361e-11	2.01775e-11
7.9	2.00362e-11	2.01774e-11
7.92	2.00341e-11	2.01768e-11
7.94	2.00306e-11	2.01783e-11
7.96	2.00293e-11	2.01819e-11
7.98	2.00296e-11	2.01715e-11
8	2.00293e-11	2.01762e-11
8.02	2.00327e-11	2.01743e-11
8.04	2.00305e-11	2.01788e-11
8.06	2.00318e-11	2.01759e-11
8.08	2.00333e-11	2.01763e-11
8.1	2.00325e-11	2.01797e-11
8.12	2.0031e-11	2.01774e-11
8.14	2.00323e-11	2.0183e-11
8.16	2.00323e-11	2.01769e-11
8.18	2.00285e-11	2.01805e-11
8.2	2.00296e-11	2.01765e-11
8.22	2.00316e-11	2.01817e-11
8.24	2.00391e-11	2.01807e-11
8.26	2.00256e-11	2.01842e-11
8.28	2.00342e-11	2.01802e-11
8.3	2.0034e-11	2.01836e-11
8.32	2.00384e-11	2.01773e-11
8.34	2.00296e-11	2.01814e-11
8.36	2.00357e-11	2.01844e-11
8.38	2.00301e-11	2.01829e-11
8.4	2.00321e-11	2.0182e-11
8.42	2.00296e-11	2.01826e-11
8.44	2.00328e-11	2.01789e-11
8.46	2.00375e-11	2.01837e-11
8.48	2.00322e-11	2.01809e-11
8.5	2.00331e-11	2.01825e-11
8.52	2.00301e-11	2.0181e-11
8.54	2.0034e-11	2.01779e-11
8.56	2.0025e-11	2.01827e-11
8.58	2.00251e-11	2.01843e-11
8.6	2.003e-11	2.01798e-11
8.62	2.00306e-11	2.0186e-11
8.64	2.00358e-11	2.01736e-11
8.66	2.00317e-11	2.01815e-11
8.68	2.00329e-11	2.0186e-11
8.7	2.0032e-11	2.0183e-11
8.72	2.00262e-11	2.01859e-11
8.74	2.00253e-11	2.01819e-11
8.76	2.00277e-11	2.01876e-11
8.78	2.00291e-11	2.01823e-11
8.8	2.00332e-11	2.01846e-11
8.82	2.00271e-11	2.01851e-11
8.84	2.00315e-11	2.01863e-11
8.86	2.00288e-11	2.01837e-11
8.88	2.00338e-11	2.01843e-11
8.9	2.00276e-11	2.01789e-11
8.92	2.00375e-11	2.01797e-11
8.94	2.00302e-11	2.01883e-11
8.96	2.0032e-11	2.01781e-11
8.98	2.00307e-11	2.01825e-11
9	2.0028e-11	2.01784e-11
9.02	2.00318e-11	2.01784e-11
9.04	2.00307e-11	2.018e-11
9.06	2.00319e-11	2.01812e-11
9.08	2.00354e-11	2.01814e-11
9.1	2.00319e-11	2.01825e-11
9.12	2.00312e-11	2.01792e-11
9.14	2.00317e-11	2.01795e-11
9.16	2.00358e-11	2.01793e-11
9.18	2.00278e-11	2.01833e-11
9.2	2.00319e-11	2.01717e-11
9.22	2.00309e-11	2.01788e-11
9.24	2.0036e-11	2.01815e-11
9.26	2.00353e-11	2.01809e-11
9.28	2.00307e-11	2.01773e-11
9.3	2.0032e-11	2.01804e-11
9.32	2.00354e-11	2.01792e-11
9.34	2.00279e-11	2.01835e-11
9.36	2.003e-11	2.01829e-11
9.38	2.00322e-11	2.01853e-11
9.4	2.00386e-11	2.01748e-11
9.42	2.00313e-11	2.01646e-11
9.44	2.00286e-11	2.01655e-11
9.46	2.00419e-11	2.01664e-11
9.48	2.00303e-11	2.01623e-11
9.5	2.0034e-11	2.01624e-11
9.52	2.00363e-11	2.01682e-11
9.54	2.00421e-11	2.01636e-11
9.56	2.00374e-11	2.01599e-11
9.58	2.0033e-11	2.0164e-11
9.6	2.00301e-11	2.01645e-11
9.62	2.00361e-11	2.01674e-11
9.64	2.00381e-11	2.01673e-11
9.66	2.00379e-11	2.01614e-11
9.68	2.00365e-11	2.01669e-11
9.7	2.00379e-11	2.01671e-11
9.72	2.00308e-11	2.017e-11
9.74	2.00398e-11	2.01666e-11
9.76	2.00293e-11	2.01632e-11
9.78	2.00381e-11	2.01678e-11
9.8	2.00376e-11	2.01613e-11
9.82	2.00342e-11	2.01604e-11
9.84	2.00342e-11	2.01638e-11
9.86	2.0035e-11	2.01619e-11
9.88	2.00344e-11	2.01645e-11
9.9	2.00323e-11	2.0164e-11
9.92	2.0035e-11	2.01632e-11
9.94	2.00339e-11	2.01633e-11
9.96	2.00377e-11	2.01646e-11
9.98	2.00337e-11	2.01697e-11
10	2.00321e-11	2.01623e-11
10.02	2.00334e-11	2.01611e-11
10.04	2.00323e-11	2.01614e-11
10.06	2.00358e-11	2.0159e-11
10.08	2.0028e-11	2.01677e-11
10.1	2.00408e-11	2.01679e-11
10.12	2.00376e-11	2.01678e-11
10.14	2.00404e-11	2.01637e-11
10.16	2.00397e-11	2.01652e-11
10.18	2.00331e-11	2.01694e-11
10.2	2.00298e-11	2.01641e-11
10.22	2.0032e-11	2.01624e-11
10.24	2.00323e-11	2.01638e-11
10.26	2.00345e-11	2.01661e-11
10.28	2.00294e-11	2.01657e-11
10.3	2.00315e-11	2.01652e-11
10.32	2.00307e-11	2.01659e-11
10.34	2.00334e-11	2.01654e-11
10.36	2.00302e-11	2.01632e-11
10.38	2.00323e-11	2.01605e-11
10.4	2.00378e-11	2.01671e-11
10.42	2.00318e-11	2.0168e-11
10.44	2.00402e-11	2.01606e-11
10.46	2.00314e-11	2.01619e-11
10.48	2.00378e-11	2.01655e-11
10.5	2.00388e-11	2.0166e-11
10.52	2.00387e-11	2.01598e-11
10.54	2.00372e-11	2.01694e-11
10.56	2.00408e-11	2.0163e-11
10.58	2.00412e-11	2.0168e-11
10.6	2.00446e-11	2.01648e-11
10.62	2.00428e-11	2.01595e-11
10.64	2.00421e-11	2.01708e-11
10.66	2.004e-11	2.01658e-11
10.68	2.00432e-11	2.01656e-11
10.7	2.00422e-11	2.01707e-11
10.72	2.00411e-11	2.01624e-11
10.74	2.00441e-11	2.01588e-11
10.76	2.00463e-11	2.0164e-11
10.78	2.00532e-11	2.01637e-11
10.8	2.00543e-11	2.0162e-11
10.82	2.00521e-11	2.01688e-11
10.84	2.00617e-11	2.01658e-11
10.86	2.00549e-11	2.01659e-11
10.88	2.00585e-11	2.01679e-11
10.9	2.00554e-11	2.01691e-11
10.92	2.00567e-11	2.01607e-11
10.94	2.00641e-11	2.01665e-11
10.96	2.00626e-11	2.01618e-11
10.98	2.00629e-11	2.01675e-11
11	2.00663e-11	2.01666e-11
11.02	2.00703e-11	2.01651e-11
11.04	2.00726e-11	2.01667e-11
11.06	2.00782e-11	2.01622e-11
11.08	2.00702e-11	2.01639e-11
11.1	2.007e-11	2.01699e-11
11.12	2.00756e-11	2.01625e-11
11.14	2.00722e-11	2.01646e-11
11.16	2.00732e-11	2.01663e-11
11.18	2.00756e-11	2.01563e-11
11.2	2.00794e-11	2.01667e-11
11.22	2.0074e-11	2.01633e-11
11.24	2.00785e-11	2.01626e-11
11.26	2.00837e-11	2.01701e-11
11.28	2.00834e-11	2.01648e-11
11.3	2.00838e-11	2.01617e-11
11.32	2.00904e-11	2.01606e-11
11.34	2.00881e-11	2.01634e-11
11.36	2.00853e-11	2.0158e-11
11.38	2.00923e-11	2.0165e-11
11.4	2.00895e-11	2.01579e-11
11.42	2.00919e-11	2.0163e-11
11.44	2.00926e-11	2.01534e-11
11.46	2.00896e-11	2.01644e-11
11.48	2.00952e-11	2.01569e-11
11.5	2.00986e-11	2.01441e-11
11.52	2.0094e-11	2.01447e-11
11.54	2.00983e-11	2.01308e-11
11.56	2.01006e-11	2.01348e-11
11.58	2.00894e-11	2.01242e-11
11.6	2.01013e-11	2.01238e-11
11.62	2.00987e-11	2.01255e-11
11.64	2.01049e-11	2.01303e-11
11.66	2.00991e-11	2.01266e-11
11.68	2.00984e-11	2.01198e-11
11.7	2.01035e-11	2.01232e-11
11.72	2.01037e-11	2.0116e-11
11.74	2.01049e-11	2.01191e-11
11.76	2.01012e-11	2.01119e-11
11.78	2.01042e-11	2.01098e-11
11.8	2.01024e-11	2.01126e-11
11.82	2.01028e-11	2.01137e-11
11.84	2.01085e-11	2.01112e-11
11.86	2.01128e-11	2.01045e-11
11.88	2.01067e-11	2.01131e-11
11.9	2.01185e-11	2.01047e-11
11.92	2.01087e-11	2.00991e-11
11.94	2.01098e-11	2.01019e-11
11.96	2.0109e-11	2.01052e-11
11.98	2.01138e-11	2.01041e-11
12	2.01109e-11	2.01002e-11
12.02	2.01143e-11	2.01021e-11
12.04	2.01129e-11	2.01001e-11
12.06	2.01163e-11	2.00997e-11
12.08	2.01219e-11	2.01007e-11
12.1	2.01127e-11	2.01003e-11
12.12	2.01154e-11	2.01001e-11
12.14	2.01096e-11	2.0099e-11
12.16	2.01172e-11	2.00948e-11
12.18	2.01203e-11	2.00941e-11
12.2	2.01142e-11	2.00914e-11
12.22	2.01222e-11	2.00921e-11
12.24	2.01227e-11	2.00961e-11
12.26	2.0127e-11	2.0094e-11
12.28	2.01172e-11	2.00851e-11
12.3	2.0124e-11	2.00921e-11
12.32	2.01194e-11	2.00917e-11
12.34	2.01164e-11	2.00893e-11
12.36	2.01246e-11	2.00972e-11
12.38	2.01209e-11	2.00953e-11
12.4	2.01212e-11	2.00888e-11
12.42	2.01294e-11	2.00952e-11
12.44	2.0123e-11	2.00968e-11
12.46	2.01204e-11	2.00945e-11
12.48	2.01267e-11	2.00844e-11
12.5	2.01211e-11	2.00825e-11
12.52	2.01244e-11	2.00842e-11
12.54	2.0124e-11	2.00886e-11
12.56	2.0124e-11	2.00902e-11
12.58	2.01243e-11	2.00905e-11
12.6	2.01218e-11	2.0086e-11
12.62	2.0126e-11	2.00875e-11
12.64	2.01221e-11	2.00872e-11
12.66	2.013e-11	2.00838e-11
12.68	2.0125e-11	2.00886e-11
12.7	2.01263e-11	2.00841e-11
12.72	2.01192e-11	2.00831e-11
12.74	2.01203e-11	2.0087e-11
12.76	2.01234e-11	2.00844e-11
12.78	2.01185e-11	2.00835e-11
12.8	2.01223e-11	2.00898e-11
12.82	2.01233e-11	2.00906e-11
12.84	2.01279e-11	2.00913e-11
12.86	2.01216e-11	2.00924e-11
12.88	2.01222e-11	2.0087e-11
12.9	2.0125e-11	2.00933e-11
12.92	2.01208e-11	2.00892e-11
12.94	2.01186e-11	2.00921e-11
12.96	2.0122e-11	2.00899e-11
12.98	2.01188e-11	2.0088e-11
13	2.01236e-11	2.00921e-11
13.02	2.01217e-11	2.00893e-11
13.04	2.01197e-11	2.00878e-11
13.06	2.01219e-11	2.00837e-11
13.08	2.01211e-11	2.00879e-11
13.1	2.01172e-11	2.00874e-11
13.12	2.01231e-11	2.00893e-11
13.14	2.01168e-11	2.00837e-11
13.16	2.01158e-11	2.00805e-11
13.18	2.01184e-11	2.00809e-11
13.2	2.01156e-11	2.00883e-11
13.22	2.01166e-11	2.01008e-11
13.24	2.01181e-11	2.0086e-11
13.26	2.01121e-11	2.00868e-11
13.28	2.01193e-11	2.00851e-11
13.3	2.01168e-11	2.00847e-11
13.32	2.01224e-11	2.00863e-11
13.34	2.01179e-11	2.00804e-11
13.36	2.01216e-11	2.00855e-11
13.38	2.01212e-11	2.00863e-11
13.4	2.01256e-11	2.00813e-11
13.42	2.01162e-11	2.00889e-11
13.44	2.01235e-11	2.0086e-11
13.46	2.01248e-11	2.00924e-11
13.48	2.01204e-11	2.00855e-11
13.5	2.0125e-11	2.00899e-11
13.52	2.01201e-11	2.00955e-11
13.54	2.01219e-11	2.00896e-11
13.56	2.01211e-11	2.00879e-11
13.58	2.01243e-11	2.00838e-11
13.6	2.0122e-11	2.00827e-11
13.62	2.01158e-11	2.00885e-11
13.64	2.01213e-11	2.00883e-11
13.66	2.01235e-11	2.00911e-11
13.68	2.01244e-11	2.00899e-11
13.7	2.01204e-11	2.00873e-11
13.72	2.01193e-11	2.00961e-11
13.74	2.01212e-11	2.00882e-11
13.76	2.01244e-11	2.00903e-11
13.78	2.01263e-11	2.00908e-11
13.8	2.01284e-11	2.00899e-11
13.82	2.01235e-11	2.00875e-11
13.84	2.01218e-11	2.00871e-11
13.86	2.01251e-11	2.00898e-11
13.88	2.01236e-11	2.00889e-11
13.9	2.01259e-11	2.00909e-11
13.92	2.01253e-11	2.00974e-11
13.94	2.01238e-11	2.00882e-11
13.96	2.01201e-11	2.00906e-11
13.98	2.01278e-11	2.00936e-11
14	2.01275e-11	2.00903e-11
14.02	2.01227e-11	2.00946e-11
14.04		2.00883e-11
14.06		2.00897e-11
14.08		2.00937e-11
14.1		2.00818e-11
14.12		2.00814e-11
14.14		2.00883e-11
14.16		2.00889e-11
14.18		2.00895e-11
14.2		2.00971e-11
14.22		2.00873e-11
14.24		2.00963e-11
14.26		2.00902e-11
14.28		2.00909e-11
14.3		2.00921e-11
14.32		2.00896e-11
14.34		2.00972e-11
14.36		2.0089e-11
14.38		2.00932e-11
14.4		2.00936e-11
14.42		2.00916e-11
14.44		2.00963e-11
14.46		2.00912e-11
14.48		2.00945e-11
14.5		2.00945e-11
14.52		2.00922e-11
14.54		2.00982e-11
14.56		2.00889e-11
14.58		2.00939e-11
14.6		2.00904e-11
14.62		2.00895e-11
14.64		2.00958e-11
14.66		2.00908e-11
14.68		2.00964e-11
14.7		2.00939e-11
14.72		2.00961e-11
14.74		2.00919e-11
14.76		2.0094e-11
14.78		2.00895e-11
14.8		2.00929e-11
14.82		2.00948e-11
14.84		2.00944e-11
14.86		2.0096e-11
14.88		2.00942e-11
14.9		2.00933e-11
14.92		2.0098e-11
14.94		2.00899e-11
14.96		2.00925e-11
14.98		2.0096e-11
15		2.00953e-11
15.02		2.00917e-11
15.04		2.00933e-11
15.06		2.00917e-11
15.08		2.00956e-11
15.1		2.00945e-11
15.12		2.00996e-11
15.14		2.00918e-11
15.16		2.00934e-11
15.18		2.00928e-11
15.2		2.00926e-11
15.22		2.00945e-11
15.24		2.00933e-11
15.26		2.0098e-11
15.28		2.00984e-11
15.3		2.0098e-11
15.32		2.00954e-11
15.34		2.00911e-11
15.36		2.00988e-11
15.38		2.00947e-11
15.4		2.00982e-11
15.42		2.01026e-11
15.44		2.00962e-11
15.46		2.0092e-11
15.48		2.01004e-11
15.5		2.00969e-11
15.52		2.00975e-11
15.54		2.01052e-11
15.56		2.00952e-11
15.58		2.01e-11
15.6		2.01017e-11
15.62		2.00993e-11
15.64		2.00976e-11
15.66		2.01118e-11
15.68		2.01045e-11
15.7		2.00971e-11
15.72		2.00972e-11
15.74		2.00994e-11
15.76		2.01012e-11
15.78		2.00969e-11
15.8		2.01012e-11
15.82		2.01034e-11
15.84		2.01045e-11
15.86		2.01027e-11
15.88		2.01004e-11
15.9		2.01057e-11
15.92		2.01006e-11
15.94		2.0096e-11
15.96		2.00984e-11
15.98		2.00973e-11
16		2.01005e-11
16.02		2.00795e-11
16.04		2.00768e-11
16.06		2.00801e-11
16.08		2.0076e-11
16.1		2.0078e-11
16.12		2.00773e-11
16.14		2.00819e-11
16.16		2.00825e-11
16.18		2.00719e-11
16.2		2.00783e-11
16.22		2.00791e-11
16.24		2.00795e-11
16.26		2.00791e-11
16.28		2.00807e-11
16.3		2.00807e-11
16.32		2.00783e-11
16.34		2.00826e-11
16.36		2.00832e-11
16.38		2.00839e-11
16.4		2.00819e-11
16.42		2.00822e-11
16.44		2.0086e-11
16.46		2.00847e-11
16.48		2.00817e-11
16.5		2.00834e-11
16.52		2.00849e-11
16.54		2.00898e-11
16.56		2.00842e-11
16.58		2.00824e-11
16.6		2.00801e-11
16.62		2.00851e-11
16.64		2.00824e-11
16.66		2.00801e-11
16.68		2.00849e-11
16.7		2.00863e-11
16.72		2.00861e-11
16.74		2.0084e-11
16.76		2.00876e-11
16.78		2.00805e-11
16.8		2.00862e-11
16.82		2.00877e-11
16.84		2.00853e-11
16.86		2.00798e-11
16.88		2.00823e-11
16.9		2.009e-11
16.92		2.0085e-11
16.94		2.00861e-11
16.96		2.00894e-11
16.98		2.00859e-11
17		2.00903e-11
17.02		2.00844e-11
17.04		2.00878e-11
17.06		2.00923e-11
17.08		2.00889e-11
17.1		2.00844e-11
17.12		2.00937e-11
17.14		2.00874e-11
17.16		2.00838e-11
17.18		2.009e-11
17.2		2.00932e-11
17.22		2.00824e-11
17.24		2.00868e-11
17.26		2.00944e-11
17.28		2.00861e-11
17.3		2.00923e-11
17.32		2.00914e-11
17.34		2.00905e-11
17.36		2.00908e-11
17.38		2.00939e-11
17.4		2.00955e-11
17.42		2.00907e-11
17.44		2.00888e-11
17.46		2.00852e-11
17.48		2.00932e-11
17.5		2.00937e-11
17.52		2.0091e-11
17.54		2.00951e-11
17.56		2.00917e-11
17.58		2.00916e-11
17.6		2.00979e-11
17.62		2.00957e-11
17.64		2.00979e-11
17.66		2.00944e-11
17.68		2.0101e-11
17.7		2.0096e-11
17.72		2.00909e-11
17.74		2.00969e-11
17.76		2.00965e-11
17.78		2.00931e-11
17.8		2.0092e-11
17.82		2.00922e-11
17.84		2.00948e-11
17.86		2.00843e-11
17.88		2.00924e-11
17.9		2.00951e-11
17.92		2.00917e-11
17.94		2.0089e-11
17.96		2.00927e-11
17.98		2.00923e-11
18		2.00984e-11
18.02		2.0092e-11
18.04		2.00891e-11
18.06		2.00965e-11
18.08		2.00899e-11
18.1		2.00935e-11
18.12		2.00975e-11
18.14		2.00943e-11
18.16		2.00862e-11
18.18		2.00953e-11
18.2		2.00964e-11
18.22		2.00896e-11
18.24		2.00903e-11
18.26		2.00958e-11
18.28		2.00947e-11
18.3		2.00902e-11
18.32		2.00923e-11
18.34		2.00969e-11
18.36		2.00964e-11
18.38		2.00933e-11
18.4		2.00989e-11
18.42		2.0095e-11
18.44		2.00929e-11
18.46		2.00955e-11
18.48		2.00976e-11
18.5		2.00953e-11
18.52		2.00933e-11
18.54		2.00932e-11
18.56		2.0095e-11
18.58		2.00914e-11
18.6		2.00944e-11
18.62		2.00938e-11
18.64		2.01009e-11
18.66		2.00999e-11
18.68		2.00998e-11
18.7		2.00974e-11
18.72		2.00994e-11
18.74		2.0102e-11
18.76		2.01008e-11
18.78		2.00989e-11
18.8		2.00989e-11
18.82		2.01015e-11
18.84		2.01017e-11
18.86		2.00979e-11
18.88		2.00989e-11
18.9		2.00965e-11
18.92		2.00982e-11
18.94		2.00927e-11
18.96		2.00993e-11
18.98		2.01034e-11
19		2.00992e-11
19.02		2.00988e-11
19.04		2.00983e-11
19.06		2.00992e-11
19.08		2.0095e-11
19.1		2.0095e-11
19.12		2.00991e-11
19.14		2.0102e-11
19.16		2.0095e-11
19.18		2.00986e-11
19.2		2.0101e-11
19.22		2.00952e-11
19.24		2.00943e-11
19.26		2.00891e-11
19.28		2.00961e-11
19.3		2.00973e-11
19.32		2.00994e-11
19.34		2.00973e-11
19.36		2.00983e-11
19.38		2.00971e-11
19.4		2.00996e-11
19.42		2.00958e-11
19.44		2.00985e-11
19.46		2.00953e-11
19.48		2.00998e-11
19.5		2.00981e-11
19.52		2.00935e-11
19.54		2.01004e-11
19.56		2.00977e-11
19.58		2.00977e-11
19.6		2.00983e-11
19.62		2.0096e-11
19.64		2.00926e-11
19.66		2.00936e-11
19.68		2.00956e-11
19.7		2.00964e-11
19.72		2.00975e-11
19.74		2.00949e-11
19.76		2.00971e-11
19.78		2.0096e-11
19.8		2.00897e-11
19.82		2.0095e-11
19.84		2.00957e-11
19.86		2.01002e-11
19.88		2.00987e-11
19.9		2.0088e-11
19.92		2.00939e-11
19.94		2.00988e-11
19.96		2.00945e-11
19.98		2.00879e-11
20		2.00875e-11
20.02		2.00977e-11
20.04		2.00906e-11
20.06		2.0093e-11
20.08		2.00992e-11
20.1		2.00973e-11
20.12		2.00992e-11
20.14		2.00974e-11
20.16		2.00946e-11
20.18		2.00961e-11
20.2		2.00949e-11
20.22		2.00971e-11
20.24		2.00991e-11
20.26		2.00985e-11
20.28		2.00976e-11
20.3		2.00972e-11
20.32		2.00988e-11
20.34		2.00963e-11
20.36		2.00941e-11
20.38		2.00937e-11
20.4		2.00978e-11
20.42		2.00999e-11
20.44		2.0098e-11
20.46		2.00907e-11
20.48		2.00889e-11
20.5		2.0095e-11
20.52		2.00978e-11
20.54		2.01007e-11
20.56		2.00977e-11
20.58		2.00915e-11
20.6		2.00985e-11
20.62		2.00969e-11
20.64		2.01009e-11
20.66		2.00965e-11
20.68		2.00939e-11
20.7		2.01019e-11
20.72		2.00969e-11
20.74		2.01012e-11
20.76		2.01065e-11
20.78		2.00947e-11
20.8		2.00967e-11
20.82		2.00967e-11
20.84		2.00934e-11
20.86		2.00996e-11
20.88		2.00973e-11
20.9		2.01009e-11
20.92		2.00977e-11
20.94		2.00998e-11
20.96		2.00946e-11
20.98		2.0095e-11
21		2.01004e-11
21.02		2.01029e-11
21.04		2.00976e-11
21.06		2.00943e-11
21.08		2.01044e-11
21.1		2.00977e-11
21.12		2.00972e-11
21.14		2.01013e-11
21.16		2.00986e-11
21.18		2.01002e-11
21.2		2.01083e-11
21.22		2.0102e-11
21.24		2.00995e-11
21.26		2.01019e-11
21.28		2.0107e-11
21.3		2.01117e-11
21.32		2.01088e-11
21.34		2.01116e-11
21.36		2.0102e-11
21.38		2.01024e-11
21.4		2.01087e-11
21.42		2.01066e-11
21.44		2.01062e-11
21.46		2.01056e-11
21.48		2.01045e-11
21.5		2.01082e-11
21.52		2.01108e-11
21.54		2.01054e-11
21.56		2.01074e-11
21.58		2.01117e-11
21.6		2.01066e-11
21.62		2.01035e-11
21.64		2.01049e-11
21.66		2.01027e-11
21.68		2.0106e-11
21.7		2.01115e-11
21.72		2.01051e-11
21.74		2.01074e-11
21.76		2.01075e-11
21.78		2.01026e-11
21.8		2.01065e-11
21.82		2.01067e-11
21.84		2.01127e-11
21.86		2.01077e-11
21.88		2.01161e-11
21.9		2.01135e-11
21.92		2.01117e-11
21.94		2.01122e-11
21.96		2.0109e-11
21.98		2.01157e-11
22		2.01063e-11
22.02		2.01075e-11
22.04		2.01108e-11
22.06		2.01091e-11
22.08		2.01103e-11
22.1		2.01119e-11
22.12		2.01093e-11
22.14		2.01137e-11
22.16		2.01069e-11
22.18		2.01112e-11
22.2		2.01085e-11
22.22		2.01093e-11
22.24		2.01139e-11
22.26		2.01052e-11
22.28		2.01089e-11
22.3		2.01123e-11
22.32		2.01083e-11
22.34		2.01125e-11
22.36		2.01146e-11
22.38		2.01143e-11
22.4		2.01158e-11
22.42		2.01119e-11
22.44		2.01096e-11
22.46		2.01165e-11
22.48		2.01051e-11
22.5		2.0111e-11
22.52		2.01121e-11
22.54		2.01143e-11
22.56		2.01166e-11
22.58		2.01117e-11
22.6		2.01129e-11
22.62		2.01208e-11
22.64		2.01122e-11
22.66		2.01115e-11
22.68		2.01185e-11
22.7		2.0114e-11
22.72		2.01165e-11
22.74		2.01169e-11
22.76		2.01141e-11
22.78		2.01181e-11
22.8		2.0114e-11
22.82		2.01141e-11
22.84		2.0116e-11
22.86		2.0115e-11
22.88		2.01095e-11
22.9		2.01179e-11
22.92		2.01147e-11
22.94		2.01146e-11
22.96		2.01102e-11
22.98		2.01176e-11
23		2.01198e-11
23.02		2.01146e-11
23.04		2.01169e-11
23.06		2.01163e-11
23.08		2.01152e-11
23.1		2.01134e-11
23.12		2.01153e-11
23.14		2.01132e-11
23.16		2.01165e-11
23.18		2.01193e-11
23.2		2.01123e-11
23.22		2.01181e-11
23.24		2.01214e-11
23.26		2.01171e-11
23.28		2.01153e-11
23.3		2.01207e-11
23.32		2.01194e-11
23.34		2.01165e-11
23.36		2.01144e-11
23.38		2.01169e-11
23.4		2.01201e-11
23.42		2.01222e-11
23.44		2.01175e-11
23.46		2.01163e-11
23.48		2.01121e-11
23.5		2.01146e-11
23.52		2.01198e-11
23.54		2.01172e-11
23.56		2.01205e-11
23.58		2.01179e-11
23.6		2.01208e-11
23.62		2.0116e-11
23.64		2.01161e-11
23.66		2.01147e-11
23.68		2.01201e-11
23.7		2.01181e-11
23.72		2.01155e-11
23.74		2.01214e-11
23.76		2.0118e-11
23.78		2.01178e-11
23.8		2.01193e-11
23.82		2.01114e-11
23.84		2.01219e-11
23.86		2.01235e-11
23.88		2.01219e-11
23.9		2.01283e-11
23.92		2.0121e-11
23.94		2.01211e-11
23.96		2.01193e-11
23.98		2.01172e-11
24		2.01217e-11
24.02		2.01179e-11
24.04		2.01186e-11
24.06		2.01277e-11
24.08		2.01197e-11
24.1		2.01228e-11
24.12		2.01212e-11
24.14		2.01162e-11
24.16		2.01223e-11
24.18		2.01257e-11
24.2		2.01198e-11
24.22		2.01221e-11
24.24		2.0128e-11
24.26		2.01239e-11
24.28		2.01272e-11
24.3		2.0123e-11
24.32		2.01256e-11
24.34		2.01251e-11
24.36		2.01202e-11
24.38		2.01194e-11
24.4		2.01254e-11
24.42		2.01244e-11
24.44		2.01213e-11
24.46		2.01228e-11
24.48		2.01259e-11
24.5		2.01233e-11
24.52		2.01226e-11
24.54		2.01268e-11
24.56		2.01247e-11
24.58		2.01232e-11
24.6		2.01251e-11
24.62		2.01236e-11
24.64		2.01274e-11
24.66		2.0124e-11
24.68		2.01297e-11
24.7		2.0132e-11
24.72		2.01281e-11
24.74		2.01245e-11
24.76		2.0125e-11
24.78		2.01232e-11
24.8		2.01306e-11
24.82		2.0125e-11
24.84		2.01261e-11
24.86		2.01273e-11
24.88		2.01275e-11
24.9		2.01231e-11
24.92		2.01256e-11
24.94		2.01209e-11
24.96		2.01258e-11
24.98		2.01262e-11
25		2.01218e-11
25.02		2.01301e-11
25.04		2.0136e-11
25.06		2.01333e-11
25.08		2.01359e-11
25.1		2.01277e-11
25.12		2.01331e-11
25.14		2.01267e-11
25.16		2.01292e-11
25.18		2.01306e-11
25.2		2.0127e-11
25.22		2.01277e-11
25.24		2.01337e-11
25.26		2.01389e-11
25.28		2.01325e-11
25.3		2.01292e-11
25.32		2.01352e-11
25.34		2.01285e-11
25.36		2.01328e-11
25.38		2.01315e-11
25.4		2.01276e-11
25.42		2.01332e-11
25.44		2.01369e-11
25.46		2.01317e-11
25.48		2.01312e-11
25.5		2.01353e-11
25.52		2.01348e-11
25.54		2.01295e-11
25.56		2.01358e-11
25.58		2.01337e-11
25.6		2.01345e-11
25.62		2.01349e-11
25.64		2.01332e-11
25.66		2.01418e-11
25.68		2.01318e-11
25.7		2.01315e-11
25.72		2.01328e-11
25.74		2.01273e-11
25.76		2.01338e-11
25.78		2.01341e-11
25.8		2.01363e-11
25.82		2.01344e-11
25.84		2.01381e-11
25.86		2.013e-11
25.88		2.01355e-11
25.9		2.01355e-11
25.92		2.01331e-11
25.94		2.01277e-11
25.96		2.01289e-11
25.98		2.01308e-11
26		2.01262e-11
26.02		2.01341e-11
26.04		2.0136e-11
26.06		2.01359e-11
26.08		2.01311e-11
26.1		2.01396e-11
26.12		2.0136e-11
26.14		2.01329e-11
26.16		2.01352e-11
26.18		2.01366e-11
26.2		2.0141e-11
26.22		2.01343e-11
26.24		2.01398e-11
26.26		2.01338e-11
26.28		2.01329e-11
26.3		2.01334e-11
26.32		2.01334e-11
26.34		2.01333e-11
26.36		2.0134e-11
26.38		2.01334e-11
26.4		2.0138e-11
26.42		2.01387e-11
26.44		2.01372e-11
26.46		2.01411e-11
26.48		2.01405e-11
26.5		2.01404e-11
26.52		2.01384e-11
26.54		2.01346e-11
26.56		2.01371e-11
26.58		2.01411e-11
26.6		2.01452e-11
26.62		2.01385e-11
26.64		2.01391e-11
26.66		2.0139e-11
26.68		2.01427e-11
26.7		2.01413e-11
26.72		2.01447e-11
26.74		2.01403e-11
26.76		2.01382e-11
26.78		2.01374e-11
26.8		2.01383e-11
26.82		2.01312e-11
26.84		2.01419e-11
26.86		2.01326e-11
26.88		2.01377e-11
26.9		2.01419e-11
26.92		2.01428e-11
26.94		2.01448e-11
26.96		2.0141e-11
26.98		2.01442e-11
27		2.01447e-11
27.02		2.01439e-11
27.04		2.01425e-11
27.06		2.01412e-11
27.08		2.01415e-11
27.1		2.01386e-11
27.12		2.01451e-11
27.14		2.01362e-11
27.16		2.01424e-11
27.18		2.01439e-11
27.2		2.01399e-11
27.22		2.01372e-11
27.24		2.01424e-11
27.26		2.01459e-11
27.28		2.01459e-11
27.3		2.01441e-11
27.32		2.01466e-11
27.34		2.01401e-11
27.36		2.01402e-11
27.38		2.01383e-11
27.4		2.014e-11
27.42		2.01393e-11
27.44		2.01382e-11
27.46		2.01435e-11
27.48		2.01368e-11
27.5		2.01421e-11
27.52		2.01461e-11
27.54		2.01373e-11
27.56		2.01409e-11
27.58		2.01373e-11
27.6		2.01425e-11
27.62		2.01406e-11
27.64		2.01443e-11
27.66		2.01341e-11
27.68		2.01437e-11
27.7		2.01482e-11
27.72		2.01446e-11
27.74		2.0144e-11
27.76		2.01426e-11
27.78		2.0144e-11
27.8		2.01472e-11
27.82		2.01434e-11
27.84		2.01513e-11
27.86		2.01484e-11
27.88		2.01444e-11
27.9		2.01451e-11
27.92		2.01453e-11
27.94		2.01459e-11
27.96		2.01523e-11
27.98		2.01417e-11
28		2.01452e-11
28.02		2.01446e-11
28.04		2.01438e-11
28.06		2.01465e-11
28.08		2.01467e-11
28.1		2.01407e-11
28.12		2.01432e-11
28.14		2.01471e-11
28.16		2.01416e-11
28.18		2.01434e-11
28.2		2.01486e-11
28.22		2.01429e-11
28.24		2.01434e-11
28.26		2.01467e-11
28.28		2.0142e-11
28.3		2.01448e-11
28.32		2.01434e-11
28.34		2.01477e-11
28.36		2.01469e-11
28.38		2.01435e-11
28.4		2.01437e-11
28.42		2.01399e-11
28.44		2.01421e-11
28.46		2.01427e-11
28.48		2.01502e-11
28.5		2.01475e-11
28.52		2.0146e-11
28.54		2.01469e-11
28.56		2.01414e-11
28.58		2.01434e-11
28.6		2.01508e-11
28.62		2.01457e-11
28.64		2.0149e-11
28.66		2.01458e-11
28.68		2.0146e-11
28.7		2.01486e-11
28.72		2.01478e-11
28.74		2.01555e-11
28.76		2.0151e-11
28.78		2.01509e-11
28.8		2.01431e-11
28.82		2.01433e-11
28.84		2.01452e-11
28.86		2.01501e-11
28.88		2.01465e-11
28.9		2.01473e-11
28.92		2.01484e-11
28.94		2.0148e-11
28.96		2.01477e-11
28.98		2.01494e-11
29		2.01483e-11
29.02		2.01398e-11
29.04		2.01511e-11
29.06		2.01478e-11
29.08		2.01444e-11
29.1		2.01486e-11
29.12		2.0153e-11
29.14		2.01467e-11
29.16		2.01571e-11
29.18		2.01537e-11
29.2		2.01504e-11
29.22		2.01498e-11
29.24		2.01515e-11
29.26		2.01558e-11
29.28		2.01481e-11
29.3		2.01503e-11
29.32		2.01553e-11
29.34		2.01575e-11
29.36		2.01547e-11
29.38		2.01491e-11
29.4		2.01496e-11
29.42		2.01498e-11
29.44		2.0151e-11
29.46		2.01518e-11
29.48		2.01522e-11
29.5		2.01553e-11
29.52		2.0162e-11
29.54		2.01505e-11
29.56		2.01549e-11
29.58		2.01555e-11
29.6		2.01548e-11
29.62		2.01554e-11
29.64		2.01514e-11
29.66		2.01551e-11
29.68		2.0154e-11
29.7		2.01528e-11
29.72		2.01502e-11
29.74		2.01502e-11
29.76		2.01542e-11
29.78		2.0158e-11
29.8		2.01588e-11
29.82		2.01549e-11
29.84		2.01578e-11
29.86		2.01541e-11
29.88		2.01579e-11
29.9		2.01481e-11
29.92		2.01496e-11
29.94		2.0157e-11
29.96		2.01532e-11
29.98		2.01553e-11
30		2.01569e-11
30.02		2.01593e-11
30.04
30.06
30.08
30.1
30.12
30.14
30.16
30.18
30.2
30.22
30.24
30.26
30.28
30.3
30.32
30.34
30.36
30.38
30.4
30.42
30.44
30.46
30.48
30.5
30.52
30.54
30.56
30.58
30.6
30.62
30.64
30.66
30.68
30.7
30.72
30.74
30.76
30.78
30.8
30.82
30.84
30.86
30.88
30.9
30.92
30.94
30.96
30.98
31
31.02
31.04
31.06
31.08
31.1
31.12
31.14
31.16
31.18
31.2
31.22
31.24
31.26
31.28
31.3
31.32
31.34
31.36
31.38
31.4
31.42
31.44
31.46
31.48
31.5
31.52
31.54
31.56
31.58
31.6
31.62
31.64
31.66
31.68
31.7
31.72
31.74
31.76
31.78
31.8
31.82
31.84
31.86
31.88
31.9
31.92
31.94
31.96
31.98
32
32.02
32.04
32.06
32.08
32.1
32.12
32.14
32.16
32.18
32.2
32.22
32.24
32.26
32.28
32.3
32.32
32.34
32.36
32.38
32.4
32.42
32.44
32.46
32.48
32.5
32.52
32.54
32.56
32.58
32.6
32.62
32.64
32.66
32.68
32.7
32.72
32.74
32.76
32.78
32.8
32.82
32.84
32.86
32.88
32.9
32.92
32.94
32.96
32.98
33
33.02
33.04
33.06
33.08
33.1
33.12
33.14
33.16
33.18
33.2
33.22
33.24
33.26
33.28
33.3
33.32
33.34
33.36
33.38
33.4
33.42
33.44
33.46
33.48
33.5
33.52
33.54
33.56
33.58
33.6
33.62
33.64
33.66
33.68
33.7
33.72
33.74
33.76
33.78
33.8
33.82
33.84
33.86
33.88
33.9
33.92
33.94
33.96
33.98
34
34.02
34.04
34.06
34.08
34.1
34.12
34.14
34.16
34.18
34.2
34.22
34.24
34.26
34.28
34.3
34.32
34.34
34.36
34.38
34.4
34.42
34.44
34.46
34.48
34.5
34.52
34.54
34.56
34.58
34.6
34.62
34.64
34.66
34.68
34.7
34.72
34.74
34.76
34.78
34.8
34.82
34.84
34.86
34.88
34.9
34.92
34.94
34.96
34.98
35
35.02
35.04
35.06
35.08
35.1
35.12
35.14
35.16
35.18
35.2
35.22
35.24
35.26
35.28
35.3
35.32
35.34
35.36
35.38
35.4
35.42
35.44
35.46
35.48
35.5
35.52
35.54
35.56
35.58
35.6
35.62
35.64
35.66
35.68
35.7
35.72
35.74
35.76
35.78
35.8
35.82
35.84
35.86
35.88
35.9
35.92
35.94
35.96
35.98
36
36.02
36.04
36.06
36.08
36.1
36.12
36.14
36.16
36.18
36.2
36.22
36.24
36.26
36.28
36.3
36.32
36.34
36.36
36.38
36.4
36.42
36.44
36.46
36.48
36.5
36.52
36.54
36.56
36.58
36.6
36.62
36.64
36.66
36.68
36.7
36.72
36.74
36.76
36.78
36.8
36.82
36.84
36.86
36.88
36.9
36.92
36.94
36.96
36.98
37
37.02
37.04
37.06
37.08
37.1
37.12
37.14
37.16
37.18
37.2
37.22
37.24
37.26
37.28
37.3
37.32
37.34
37.36
37.38
37.4
37.42
37.44
37.46
37.48
37.5
37.52
37.54
37.56
37.58
37.6
37.62
37.64
37.66
37.68
37.7
37.72
37.74
37.76
37.78
37.8
37.82
37.84
37.86
37.88
37.9
37.92
37.94
37.96
37.98
38
38.02
38.04
38.06
38.08
38.1
38.12
38.14
38.16
38.18
38.2
38.22
38.24
38.26
38.28
38.3
38.32
38.34
38.36
38.38
38.4
38.42
38.44
38.46
38.48
38.5
38.52
38.54
38.56
38.58
38.6
38.62
38.64
38.66
38.68
38.7
38.72
38.74
38.76
38.78
38.8
38.82
38.84
38.86
38.88
38.9
38.92
38.94
38.96
38.98
39
39.02
39.04
39.06
39.08
39.1
39.12
39.14
39.16
39.18
39.2
39.22
39.24
39.26
39.28
39.3
39.32
39.34
39.36
39.38
39.4
39.42
39.44
39.46
39.48
39.5
39.52
39.54
39.56
39.58
39.6
39.62
39.64
39.66
39.68
39.7
39.72
39.74
39.76
39.78
39.8
39.82
39.84
39.86
39.88
39.9
39.92
39.94
39.96
[truncated: 4,002 more rows]

## Sheet: 16930116-120.abf
	Cm(F)
time (ms)	100uM 5-HT	100uM cocaine
0.02	1.76463e-11	1.74735e-11
0.04	1.7647e-11	1.74701e-11
0.06	1.76464e-11	1.74679e-11
0.08	1.76482e-11	1.74676e-11
0.1	1.76476e-11	1.74706e-11
0.12	1.76406e-11	1.74716e-11
0.14	1.76508e-11	1.74707e-11
0.16	1.76462e-11	1.74688e-11
0.18	1.7651e-11	1.74689e-11
0.2	1.76452e-11	1.74752e-11
0.22	1.76472e-11	1.74723e-11
0.24	1.76462e-11	1.74731e-11
0.26	1.76529e-11	1.74727e-11
0.28	1.7647e-11	1.74697e-11
0.3	1.7653e-11	1.74745e-11
0.32	1.76439e-11	1.74731e-11
0.34	1.76508e-11	1.74763e-11
0.36	1.76473e-11	1.74757e-11
0.38	1.76519e-11	1.74752e-11
0.4	1.76497e-11	1.74705e-11
0.42	1.76505e-11	1.74698e-11
0.44	1.76544e-11	1.74784e-11
0.46	1.76494e-11	1.74705e-11
0.48	1.76459e-11	1.74766e-11
0.5	1.76578e-11	1.74736e-11
0.52	1.76536e-11	1.74776e-11
0.54	1.7655e-11	1.74739e-11
0.56	1.76528e-11	1.74715e-11
0.58	1.76552e-11	1.74718e-11
0.6	1.766e-11	1.74695e-11
0.62	1.76536e-11	1.74727e-11
0.64	1.76567e-11	1.74737e-11
0.66	1.76512e-11	1.74681e-11
0.68	1.76534e-11	1.74704e-11
0.7	1.76559e-11	1.74735e-11
0.72	1.7656e-11	1.74744e-11
0.74	1.76563e-11	1.74756e-11
0.76	1.7659e-11	1.74746e-11
0.78	1.76551e-11	1.74692e-11
0.8	1.76586e-11	1.7472e-11
0.82	1.76539e-11	1.74724e-11
0.84	1.76598e-11	1.74712e-11
0.86	1.76554e-11	1.74721e-11
0.88	1.76607e-11	1.74719e-11
0.9	1.76626e-11	1.74702e-11
0.92	1.76593e-11	1.74768e-11
0.94	1.76584e-11	1.74749e-11
0.96	1.76584e-11	1.74717e-11
0.98	1.76647e-11	1.74723e-11
1	1.76598e-11	1.74726e-11
1.02	1.76578e-11	1.74764e-11
1.04	1.76623e-11	1.74773e-11
1.06	1.76638e-11	1.74721e-11
1.08	1.76599e-11	1.74746e-11
1.1	1.76584e-11	1.74736e-11
1.12	1.76633e-11	1.74734e-11
1.14	1.76618e-11	1.74754e-11
1.16	1.76583e-11	1.7474e-11
1.18	1.76629e-11	1.74746e-11
1.2	1.7659e-11	1.74718e-11
1.22	1.76609e-11	1.7476e-11
1.24	1.76591e-11	1.74759e-11
1.26	1.76582e-11	1.74758e-11
1.28	1.76585e-11	1.74765e-11
1.3	1.76614e-11	1.74736e-11
1.32	1.76618e-11	1.74758e-11
1.34	1.76633e-11	1.7475e-11
1.36	1.76634e-11	1.74753e-11
1.38	1.76582e-11	1.74786e-11
1.4	1.76607e-11	1.74784e-11
1.42	1.76629e-11	1.74744e-11
1.44	1.76606e-11	1.7473e-11
1.46	1.76571e-11	1.74783e-11
1.48	1.76645e-11	1.74752e-11
1.5	1.76615e-11	1.74781e-11
1.52	1.76665e-11	1.74784e-11
1.54	1.76623e-11	1.74781e-11
1.56	1.76603e-11	1.74707e-11
1.58	1.7661e-11	1.74746e-11
1.6	1.7664e-11	1.74767e-11
1.62	1.76656e-11	1.7476e-11
1.64	1.76623e-11	1.74717e-11
1.66	1.76641e-11	1.74763e-11
1.68	1.7664e-11	1.7478e-11
1.7	1.76643e-11	1.74733e-11
1.72	1.76629e-11	1.74763e-11
1.74	1.76655e-11	1.74751e-11
1.76	1.7666e-11	1.74729e-11
1.78	1.76619e-11	1.74745e-11
1.8	1.76643e-11	1.74736e-11
1.82	1.76671e-11	1.74733e-11
1.84	1.76595e-11	1.74747e-11
1.86	1.76614e-11	1.74737e-11
1.88	1.76586e-11	1.74795e-11
1.9	1.76607e-11	1.74785e-11
1.92	1.76596e-11	1.74777e-11
1.94	1.76623e-11	1.74776e-11
1.96	1.76614e-11	1.74741e-11
1.98	1.76596e-11	1.74801e-11
2	1.76589e-11	1.74725e-11
2.02	1.76566e-11	1.74758e-11
2.04	1.76652e-11	1.74822e-11
2.06	1.76594e-11	1.74797e-11
2.08	1.76629e-11	1.74785e-11
2.1	1.76628e-11	1.74707e-11
2.12	1.76616e-11	1.74747e-11
2.14	1.76594e-11	1.74796e-11
2.16	1.76599e-11	1.74761e-11
2.18	1.76561e-11	1.74781e-11
2.2	1.76549e-11	1.74791e-11
2.22	1.76618e-11	1.74774e-11
2.24	1.76587e-11	1.7478e-11
2.26	1.76621e-11	1.74785e-11
2.28	1.76593e-11	1.74761e-11
2.3	1.76619e-11	1.7478e-11
2.32	1.76615e-11	1.74744e-11
2.34	1.76594e-11	1.74754e-11
2.36	1.76625e-11	1.7477e-11
2.38	1.76636e-11	1.74745e-11
2.4	1.76611e-11	1.74825e-11
2.42	1.76623e-11	1.74764e-11
2.44	1.76588e-11	1.74785e-11
2.46	1.76604e-11	1.74763e-11
2.48	1.76624e-11	1.74798e-11
2.5	1.76596e-11	1.74786e-11
2.52	1.76595e-11	1.74818e-11
2.54	1.76599e-11	1.74801e-11
2.56	1.76581e-11	1.74811e-11
2.58	1.76553e-11	1.74772e-11
2.6	1.76593e-11	1.74766e-11
2.62	1.76639e-11	1.74812e-11
2.64	1.76608e-11	1.74856e-11
2.66	1.76598e-11	1.74786e-11
2.68	1.7662e-11	1.74786e-11
2.7	1.76645e-11	1.74783e-11
2.72	1.76602e-11	1.7479e-11
2.74	1.76606e-11	1.74795e-11
2.76	1.766e-11	1.74781e-11
2.78	1.76607e-11	1.74781e-11
2.8	1.76623e-11	1.74786e-11
2.82	1.76701e-11	1.74797e-11
2.84	1.76631e-11	1.74778e-11
2.86	1.76655e-11	1.74799e-11
2.88	1.76645e-11	1.74808e-11
2.9	1.76677e-11	1.7475e-11
2.92	1.7661e-11	1.74817e-11
2.94	1.76602e-11	1.7479e-11
2.96	1.76672e-11	1.74788e-11
2.98	1.7665e-11	1.74779e-11
3	1.7663e-11	1.7483e-11
3.02	1.76691e-11	1.74761e-11
3.04	1.76668e-11	1.74831e-11
3.06	1.76658e-11	1.74757e-11
3.08	1.76663e-11	1.74805e-11
3.1	1.7669e-11	1.74808e-11
3.12	1.76655e-11	1.74765e-11
3.14	1.76684e-11	1.74787e-11
3.16	1.76689e-11	1.74817e-11
3.18	1.76625e-11	1.74788e-11
3.2	1.76718e-11	1.7479e-11
3.22	1.76674e-11	1.74818e-11
3.24	1.76713e-11	1.74825e-11
3.26	1.76701e-11	1.74784e-11
3.28	1.76683e-11	1.74819e-11
3.3	1.76681e-11	1.74827e-11
3.32	1.76731e-11	1.74805e-11
3.34	1.76681e-11	1.74819e-11
3.36	1.76647e-11	1.74811e-11
3.38	1.76689e-11	1.74783e-11
3.4	1.76734e-11	1.74768e-11
3.42	1.76692e-11	1.74797e-11
3.44	1.76725e-11	1.74794e-11
3.46	1.76689e-11	1.74849e-11
3.48	1.76695e-11	1.74776e-11
3.5	1.76764e-11	1.74728e-11
3.52	1.76705e-11	1.74827e-11
3.54	1.76714e-11	1.74797e-11
3.56	1.76704e-11	1.74789e-11
3.58	1.76716e-11	1.74806e-11
3.6	1.76688e-11	1.74807e-11
3.62	1.76685e-11	1.74713e-11
3.64	1.76699e-11	1.74825e-11
3.66	1.76703e-11	1.74801e-11
3.68	1.76779e-11	1.7482e-11
3.7	1.76712e-11	1.74828e-11
3.72	1.76776e-11	1.74845e-11
3.74	1.76729e-11	1.7478e-11
3.76	1.76704e-11	1.74766e-11
3.78	1.76731e-11	1.74764e-11
3.8	1.7672e-11	1.7476e-11
3.82	1.76747e-11	1.74759e-11
3.84	1.76746e-11	1.74768e-11
3.86	1.76729e-11	1.74766e-11
3.88	1.76777e-11	1.74769e-11
3.9	1.76764e-11	1.74807e-11
3.92	1.76735e-11	1.74784e-11
3.94	1.76727e-11	1.74794e-11
3.96	1.76753e-11	1.74748e-11
3.98	1.76786e-11	1.74761e-11
4	1.76771e-11	1.74743e-11
4.02	1.76762e-11	1.74788e-11
4.04	1.76742e-11	1.74801e-11
4.06	1.76805e-11	1.74789e-11
4.08	1.77019e-11	1.74708e-11
4.1	1.77021e-11	1.74774e-11
4.12	1.76742e-11	1.74749e-11
4.14	1.7673e-11	1.74772e-11
4.16	1.76117e-11	1.74707e-11
4.18	1.7464e-11	1.74785e-11
4.2	1.74385e-11	1.74815e-11
4.22	1.74284e-11	1.74788e-11
4.24	1.74281e-11	1.74796e-11
4.26	1.74278e-11	1.74791e-11
4.28	1.74242e-11	1.74807e-11
4.3	1.74259e-11	1.7479e-11
4.32	1.74267e-11	1.74803e-11
4.34	1.74274e-11	1.74781e-11
4.36	1.74294e-11	1.74764e-11
4.38	1.74352e-11	1.74773e-11
4.4	1.74341e-11	1.74792e-11
4.42	1.74381e-11	1.74833e-11
4.44	1.74381e-11	1.74758e-11
4.46	1.74388e-11	1.74825e-11
4.48	1.74388e-11	1.74819e-11
4.5	1.74387e-11	1.74822e-11
4.52	1.74376e-11	1.74782e-11
4.54	1.74365e-11	1.7477e-11
4.56	1.7433e-11	1.74781e-11
4.58	1.74355e-11	1.74809e-11
4.6	1.74389e-11	1.7475e-11
4.62	1.74373e-11	1.74815e-11
4.64	1.74365e-11	1.74779e-11
4.66	1.74329e-11	1.74856e-11
4.68	1.74411e-11	1.74772e-11
4.7	1.74372e-11	1.74793e-11
4.72	1.74377e-11	1.74777e-11
4.74	1.74361e-11	1.74819e-11
4.76	1.74339e-11	1.74857e-11
4.78	1.744e-11	1.7479e-11
4.8	1.74374e-11	1.74797e-11
4.82	1.74341e-11	1.74815e-11
4.84	1.74365e-11	1.74783e-11
4.86	1.7432e-11	1.74837e-11
4.88	1.74408e-11	1.74798e-11
4.9	1.74338e-11	1.74773e-11
4.92	1.74371e-11	1.74756e-11
4.94	1.74367e-11	1.74778e-11
4.96	1.74371e-11	1.74775e-11
4.98	1.74419e-11	1.74762e-11
5	1.74342e-11	1.74798e-11
5.02	1.74387e-11	1.74808e-11
5.04	1.74373e-11	1.74855e-11
5.06	1.74376e-11	1.74796e-11
5.08	1.7438e-11	1.74801e-11
5.1	1.74386e-11	1.74776e-11
5.12	1.74373e-11	1.7478e-11
5.14	1.74389e-11	1.74768e-11
5.16	1.744e-11	1.74813e-11
5.18	1.74416e-11	1.74804e-11
5.2	1.74347e-11	1.74775e-11
5.22	1.74365e-11	1.74763e-11
5.24	1.74308e-11	1.74744e-11
5.26	1.74378e-11	1.74813e-11
5.28	1.74351e-11	1.74803e-11
5.3	1.74366e-11	1.74797e-11
5.32	1.74383e-11	1.7483e-11
5.34	1.74384e-11	1.74817e-11
5.36	1.74339e-11	1.74791e-11
5.38	1.74399e-11	1.74788e-11
5.4	1.74353e-11	1.74819e-11
5.42	1.74347e-11	1.74807e-11
5.44	1.74402e-11	1.748e-11
5.46	1.74351e-11	1.7483e-11
5.48	1.74426e-11	1.74782e-11
5.5	1.74373e-11	1.74794e-11
5.52	1.74384e-11	1.74801e-11
5.54	1.7438e-11	1.74878e-11
5.56	1.74378e-11	1.7482e-11
5.58	1.74399e-11	1.74822e-11
5.6	1.74361e-11	1.74725e-11
5.62	1.74401e-11	1.74775e-11
5.64	1.74296e-11	1.74769e-11
5.66	1.74384e-11	1.74786e-11
5.68	1.74354e-11	1.74859e-11
5.7	1.74323e-11	1.74844e-11
5.72	1.74402e-11	1.74811e-11
5.74	1.74389e-11	1.74838e-11
5.76	1.74379e-11	1.74795e-11
5.78	1.74373e-11	1.74836e-11
5.8	1.74395e-11	1.74812e-11
5.82	1.74375e-11	1.74842e-11
5.84	1.74385e-11	1.74873e-11
5.86	1.74394e-11	1.74839e-11
5.88	1.74383e-11	1.7481e-11
5.9	1.74441e-11	1.74794e-11
5.92	1.74389e-11	1.74784e-11
5.94	1.74395e-11	1.74803e-11
5.96	1.74365e-11	1.74822e-11
5.98	1.74351e-11	1.74848e-11
6	1.74354e-11	1.74888e-11
6.02	1.74435e-11	1.74753e-11
6.04	1.74409e-11	1.74799e-11
6.06	1.74394e-11	1.74774e-11
6.08	1.74383e-11	1.74856e-11
6.1	1.74406e-11	1.74802e-11
6.12	1.74402e-11	1.74797e-11
6.14	1.74365e-11	1.74755e-11
6.16	1.74395e-11	1.74777e-11
6.18	1.74407e-11	1.74804e-11
6.2	1.74369e-11	1.74772e-11
6.22	1.74373e-11	1.74784e-11
6.24	1.74383e-11	1.74826e-11
6.26	1.74387e-11	1.74839e-11
6.28	1.74364e-11	1.74791e-11
6.3	1.74387e-11	1.74789e-11
6.32	1.74367e-11	1.74852e-11
6.34	1.74388e-11	1.74811e-11
6.36	1.7438e-11	1.7478e-11
6.38	1.74399e-11	1.74777e-11
6.4	1.74399e-11	1.74867e-11
6.42	1.74389e-11	1.74778e-11
6.44	1.74406e-11	1.74792e-11
6.46	1.74408e-11	1.74772e-11
6.48	1.74367e-11	1.74817e-11
6.5	1.74429e-11	1.74866e-11
6.52	1.74364e-11	1.74888e-11
6.54	1.74398e-11	1.74875e-11
6.56	1.74442e-11	1.74838e-11
6.58	1.74441e-11	1.74797e-11
6.6	1.74413e-11	1.74853e-11
6.62	1.74435e-11	1.74812e-11
6.64	1.74404e-11	1.74805e-11
6.66	1.74371e-11	1.74803e-11
6.68	1.74387e-11	1.74836e-11
6.7	1.74458e-11	1.748e-11
6.72	1.74402e-11	1.74823e-11
6.74	1.74376e-11	1.74863e-11
6.76	1.74367e-11	1.74811e-11
6.78	1.74451e-11	1.74834e-11
6.8	1.74419e-11	1.74871e-11
6.82	1.74406e-11	1.74822e-11
6.84	1.74409e-11	1.74859e-11
6.86	1.74398e-11	1.74845e-11
6.88	1.74439e-11	1.74818e-11
6.9	1.74419e-11	1.74859e-11
6.92	1.74435e-11	1.74857e-11
6.94	1.74411e-11	1.74862e-11
6.96	1.7445e-11	1.74881e-11
6.98	1.74362e-11	1.74876e-11
7	1.74379e-11	1.749e-11
7.02	1.74357e-11	1.74909e-11
7.04	1.74376e-11	1.7488e-11
7.06	1.74441e-11	1.74891e-11
7.08	1.74456e-11	1.74864e-11
7.1	1.74435e-11	1.74888e-11
7.12	1.74465e-11	1.74881e-11
7.14	1.74391e-11	1.74913e-11
7.16	1.74404e-11	1.74888e-11
7.18	1.74367e-11	1.74902e-11
7.2	1.74416e-11	1.74925e-11
7.22	1.74448e-11	1.74916e-11
7.24	1.74478e-11	1.74893e-11
7.26	1.7445e-11	1.74936e-11
7.28	1.74386e-11	1.74896e-11
7.3	1.74441e-11	1.74942e-11
7.32	1.74445e-11	1.74897e-11
7.34	1.74443e-11	1.74883e-11
7.36	1.74409e-11	1.74889e-11
7.38	1.74379e-11	1.74929e-11
7.4	1.74454e-11	1.7485e-11
7.42	1.74429e-11	1.74884e-11
7.44	1.74388e-11	1.7491e-11
7.46	1.74453e-11	1.74941e-11
7.48	1.74446e-11	1.7491e-11
7.5	1.74409e-11	1.74905e-11
7.52	1.74388e-11	1.74916e-11
7.54	1.74462e-11	1.74946e-11
7.56	1.74432e-11	1.74902e-11
7.58	1.74437e-11	1.74893e-11
7.6	1.74385e-11	1.74937e-11
7.62	1.74448e-11	1.74946e-11
7.64	1.74407e-11	1.74929e-11
7.66	1.74447e-11	1.74925e-11
7.68	1.74428e-11	1.74913e-11
7.7	1.74452e-11	1.74888e-11
7.72	1.74493e-11	1.74875e-11
7.74	1.74379e-11	1.74927e-11
7.76	1.74413e-11	1.749e-11
7.78	1.74443e-11	1.74908e-11
7.8	1.74429e-11	1.74882e-11
7.82	1.7449e-11	1.74872e-11
7.84	1.74414e-11	1.74883e-11
7.86	1.74443e-11	1.74931e-11
7.88	1.74437e-11	1.74882e-11
7.9	1.74451e-11	1.74895e-11
7.92	1.74406e-11	1.74888e-11
7.94	1.74504e-11	1.74892e-11
7.96	1.74405e-11	1.74944e-11
7.98	1.74445e-11	1.74907e-11
8	1.74433e-11	1.74931e-11
8.02	1.74439e-11	1.74886e-11
8.04	1.74418e-11	1.74941e-11
8.06	1.74428e-11	1.74948e-11
8.08	1.7443e-11	1.74945e-11
8.1	1.74455e-11	1.7491e-11
8.12	1.74415e-11	1.74934e-11
8.14	1.74468e-11	1.74923e-11
8.16	1.74434e-11	1.74955e-11
8.18	1.74453e-11	1.74909e-11
8.2	1.74452e-11	1.74925e-11
8.22	1.74428e-11	1.74932e-11
8.24	1.74412e-11	1.74926e-11
8.26	1.74445e-11	1.74941e-11
8.28	1.74469e-11	1.74942e-11
8.3	1.74429e-11	1.74927e-11
8.32	1.74392e-11	1.74965e-11
8.34	1.74422e-11	1.74926e-11
8.36	1.74428e-11	1.74909e-11
8.38	1.74467e-11	1.74905e-11
8.4	1.74474e-11	1.74892e-11
8.42	1.74418e-11	1.74917e-11
8.44	1.7441e-11	1.74936e-11
8.46	1.74433e-11	1.74948e-11
8.48	1.74415e-11	1.74963e-11
8.5	1.74421e-11	1.74986e-11
8.52	1.74443e-11	1.74953e-11
8.54	1.74424e-11	1.7492e-11
8.56	1.74408e-11	1.74942e-11
8.58	1.74477e-11	1.74951e-11
8.6	1.74458e-11	1.7496e-11
8.62	1.74434e-11	1.74934e-11
8.64	1.74473e-11	1.74892e-11
8.66	1.74449e-11	1.74892e-11
8.68	1.74476e-11	1.75067e-11
8.7	1.74458e-11	1.74921e-11
8.72	1.74452e-11	1.74991e-11
8.74	1.74475e-11	1.74928e-11
8.76	1.7444e-11	1.74881e-11
8.78	1.74487e-11	1.74663e-11
8.8	1.74433e-11	1.74302e-11
8.82	1.74408e-11	1.73945e-11
8.84	1.74456e-11	1.73619e-11
8.86	1.7443e-11	1.73391e-11
8.88	1.74438e-11	1.73188e-11
8.9	1.74466e-11	1.73063e-11
8.92	1.74422e-11	1.72935e-11
8.94	1.74483e-11	1.72878e-11
8.96	1.74467e-11	1.72887e-11
8.98	1.74425e-11	1.72864e-11
9	1.74495e-11	1.7287e-11
9.02	1.7446e-11	1.72811e-11
9.04	1.74481e-11	1.72782e-11
9.06	1.74431e-11	1.72768e-11
9.08	1.74618e-11	1.72702e-11
9.1	1.74765e-11	1.72748e-11
9.12	1.74451e-11	1.72747e-11
9.14	1.74396e-11	1.72732e-11
9.16	1.74354e-11	1.72716e-11
9.18	1.74334e-11	1.72752e-11
9.2	1.74357e-11	1.72693e-11
9.22	1.74298e-11	1.72662e-11
9.24	1.74273e-11	1.7266e-11
9.26	1.74216e-11	1.72675e-11
9.28	1.74303e-11	1.72607e-11
9.3	1.74272e-11	1.72661e-11
9.32	1.74198e-11	1.72616e-11
9.34	1.74299e-11	1.72612e-11
9.36	1.74294e-11	1.72641e-11
9.38	1.74276e-11	1.72611e-11
9.4	1.74258e-11	1.72592e-11
9.42	1.74263e-11	1.72589e-11
9.44	1.74244e-11	1.72634e-11
9.46	1.74247e-11	1.72585e-11
9.48	1.74249e-11	1.7261e-11
9.5	1.74292e-11	1.72538e-11
9.52	1.74233e-11	1.72597e-11
9.54	1.7431e-11	1.72568e-11
9.56	1.74288e-11	1.72562e-11
9.58	1.74306e-11	1.72581e-11
9.6	1.74314e-11	1.72574e-11
9.62	1.74277e-11	1.72569e-11
9.64	1.74344e-11	1.72548e-11
9.66	1.74337e-11	1.72532e-11
9.68	1.74306e-11	1.72567e-11
9.7	1.74313e-11	1.72517e-11
9.72	1.74359e-11	1.72509e-11
9.74	1.74284e-11	1.72563e-11
9.76	1.74385e-11	1.72523e-11
9.78	1.74342e-11	1.7252e-11
9.8	1.74342e-11	1.72511e-11
9.82	1.74296e-11	1.7253e-11
9.84	1.74362e-11	1.72537e-11
9.86	1.74316e-11	1.72508e-11
9.88	1.74375e-11	1.72488e-11
9.9	1.74405e-11	1.72498e-11
9.92	1.74372e-11	1.72501e-11
9.94	1.74372e-11	1.72449e-11
9.96	1.74448e-11	1.72436e-11
9.98	1.74445e-11	1.72471e-11
10	1.74387e-11	1.72447e-11
10.02	1.74399e-11	1.72453e-11
10.04	1.74441e-11	1.72437e-11
10.06	1.74436e-11	1.72442e-11
10.08	1.74458e-11	1.72442e-11
10.1	1.74437e-11	1.72442e-11
10.12	1.74422e-11	1.72479e-11
10.14	1.74498e-11	1.72428e-11
10.16	1.74506e-11	1.7245e-11
10.18	1.74475e-11	1.72471e-11
10.2	1.74484e-11	1.7244e-11
10.22	1.74565e-11	1.72488e-11
10.24	1.74543e-11	1.72452e-11
10.26	1.74537e-11	1.72408e-11
10.28	1.74565e-11	1.72459e-11
10.3	1.74535e-11	1.72424e-11
10.32	1.74578e-11	1.72477e-11
10.34	1.74585e-11	1.72404e-11
10.36	1.74585e-11	1.72437e-11
10.38	1.7462e-11	1.7243e-11
10.4	1.74621e-11	1.72407e-11
10.42	1.74628e-11	1.72448e-11
10.44	1.74689e-11	1.72413e-11
10.46	1.74663e-11	1.7247e-11
10.48	1.74707e-11	1.72401e-11
10.5	1.74714e-11	1.72371e-11
10.52	1.74709e-11	1.72406e-11
10.54	1.74715e-11	1.72383e-11
10.56	1.7475e-11	1.72378e-11
10.58	1.74794e-11	1.72374e-11
10.6	1.74806e-11	1.72477e-11
10.62	1.74764e-11	1.72414e-11
10.64	1.7482e-11	1.72412e-11
10.66	1.74798e-11	1.72388e-11
10.68	1.74793e-11	1.72413e-11
10.7	1.7487e-11	1.72426e-11
10.72	1.74853e-11	1.72371e-11
10.74	1.74837e-11	1.72387e-11
10.76	1.74884e-11	1.72404e-11
10.78	1.74875e-11	1.72349e-11
10.8	1.74853e-11	1.72356e-11
10.82	1.74889e-11	1.72394e-11
10.84	1.7492e-11	1.72354e-11
10.86	1.7492e-11	1.72382e-11
10.88	1.74918e-11	1.72401e-11
10.9	1.74945e-11	1.72367e-11
10.92	1.7498e-11	1.72386e-11
10.94	1.74942e-11	1.72351e-11
10.96	1.7498e-11	1.72376e-11
10.98	1.74997e-11	1.72365e-11
11	1.75017e-11	1.72411e-11
11.02	1.75011e-11	1.72341e-11
11.04	1.75027e-11	1.72341e-11
11.06	1.75097e-11	1.72361e-11
11.08	1.75057e-11	1.72355e-11
11.1	1.7508e-11	1.72365e-11
11.12	1.75145e-11	1.72318e-11
11.14	1.75098e-11	1.72373e-11
11.16	1.75093e-11	1.72373e-11
11.18	1.75149e-11	1.72378e-11
11.2	1.75176e-11	1.72359e-11
11.22	1.75171e-11	1.72347e-11
11.24	1.75191e-11	1.72313e-11
11.26	1.75172e-11	1.72295e-11
11.28	1.75187e-11	1.72387e-11
11.3	1.75193e-11	1.72379e-11
11.32	1.75225e-11	1.72271e-11
11.34	1.75237e-11	1.72345e-11
11.36	1.75251e-11	1.72372e-11
11.38	1.75263e-11	1.72345e-11
11.4	1.75281e-11	1.7234e-11
11.42	1.75268e-11	1.72248e-11
11.44	1.75289e-11	1.72367e-11
11.46	1.75333e-11	1.72307e-11
11.48	1.75337e-11	1.72336e-11
11.5	1.75273e-11	1.72308e-11
11.52	1.75345e-11	1.72276e-11
11.54	1.7532e-11	1.72287e-11
11.56	1.75406e-11	1.72334e-11
11.58	1.75378e-11	1.72274e-11
11.6	1.75403e-11	1.72308e-11
11.62	1.75354e-11	1.72319e-11
11.64	1.75453e-11	1.72376e-11
11.66	1.75404e-11	1.72297e-11
11.68	1.75379e-11	1.72282e-11
11.7	1.75439e-11	1.72268e-11
11.72	1.75445e-11	1.72321e-11
11.74	1.75494e-11	1.72327e-11
11.76	1.75462e-11	1.72276e-11
11.78	1.75467e-11	1.72336e-11
11.8	1.75496e-11	1.72317e-11
11.82	1.75519e-11	1.72288e-11
11.84	1.75478e-11	1.72281e-11
11.86	1.7547e-11	1.72318e-11
11.88	1.75579e-11	1.72316e-11
11.9	1.75568e-11	1.72302e-11
11.92	1.75532e-11	1.72328e-11
11.94	1.75571e-11	1.72262e-11
11.96	1.75609e-11	1.72271e-11
11.98	1.75562e-11	1.72274e-11
12	1.75603e-11	1.72278e-11
12.02	1.75634e-11	1.72298e-11
12.04	1.75607e-11	1.72298e-11
12.06	1.75602e-11	1.72305e-11
12.08	1.7566e-11	1.72255e-11
12.1	1.75671e-11	1.72301e-11
12.12	1.7565e-11	1.72278e-11
12.14	1.75728e-11	1.72275e-11
12.16	1.75683e-11	1.72283e-11
12.18	1.75687e-11	1.72268e-11
12.2	1.757e-11	1.72287e-11
12.22	1.75692e-11	1.72233e-11
12.24	1.75715e-11	1.72269e-11
12.26	1.75711e-11	1.72273e-11
12.28	1.75726e-11	1.72272e-11
12.3	1.7578e-11	1.72244e-11
12.32	1.7575e-11	1.72269e-11
12.34	1.75795e-11	1.72277e-11
12.36	1.758e-11	1.72297e-11
12.38	1.75772e-11	1.72283e-11
12.4	1.75794e-11	1.72299e-11
12.42	1.75832e-11	1.72246e-11
12.44	1.75785e-11	1.72281e-11
12.46	1.75799e-11	1.72242e-11
12.48	1.75834e-11	1.72299e-11
12.5	1.75835e-11	1.72236e-11
12.52	1.75851e-11	1.72218e-11
12.54	1.75823e-11	1.72235e-11
12.56	1.75875e-11	1.72219e-11
12.58	1.75834e-11	1.72262e-11
12.6	1.75855e-11	1.72235e-11
12.62	1.75856e-11	1.72255e-11
12.64	1.75852e-11	1.72194e-11
12.66	1.75876e-11	1.72233e-11
12.68	1.75868e-11	1.72244e-11
12.7	1.75868e-11	1.72236e-11
12.72	1.7589e-11	1.72263e-11
12.74	1.7592e-11	1.7221e-11
12.76	1.75898e-11	1.72254e-11
12.78	1.75902e-11	1.7222e-11
12.8	1.7592e-11	1.7221e-11
12.82	1.75914e-11	1.72207e-11
12.84	1.75945e-11	1.72214e-11
12.86	1.75953e-11	1.7221e-11
12.88	1.75922e-11	1.72196e-11
12.9	1.75896e-11	1.72267e-11
12.92	1.75927e-11	1.7223e-11
12.94	1.75921e-11	1.72258e-11
12.96	1.75948e-11	1.72242e-11
12.98	1.75946e-11	1.72271e-11
13	1.75982e-11	1.722e-11
13.02	1.75934e-11	1.72234e-11
13.04	1.76026e-11	1.72199e-11
13.06	1.76016e-11	1.72258e-11
13.08	1.75968e-11	1.7223e-11
13.1	1.75964e-11	1.7226e-11
13.12	1.75984e-11	1.72246e-11
13.14	1.7602e-11	1.72237e-11
13.16	1.76003e-11	1.72202e-11
13.18	1.76021e-11	1.72286e-11
13.2	1.76048e-11	1.72209e-11
13.22	1.75986e-11	1.72187e-11
13.24	1.75994e-11	1.72216e-11
13.26	1.76018e-11	1.72185e-11
13.28	1.76074e-11	1.7221e-11
13.3	1.76057e-11	1.72264e-11
13.32	1.7606e-11	1.72185e-11
13.34	1.7601e-11	1.72221e-11
13.36	1.7608e-11	1.72205e-11
13.38	1.76071e-11	1.7222e-11
13.4	1.76082e-11	1.7223e-11
13.42	1.76083e-11	1.72229e-11
13.44	1.76029e-11	1.72187e-11
13.46	1.76088e-11	1.72197e-11
13.48	1.7606e-11	1.72242e-11
13.5	1.76086e-11	1.72182e-11
13.52	1.76056e-11	1.7222e-11
13.54	1.76133e-11	1.72203e-11
13.56	1.76089e-11	1.72197e-11
13.58	1.76131e-11	1.72276e-11
13.6	1.76121e-11	1.72194e-11
13.62	1.76114e-11	1.72208e-11
13.64	1.76103e-11	1.72172e-11
13.66	1.76119e-11	1.7228e-11
13.68	1.76122e-11	1.72253e-11
13.7	1.76134e-11	1.72217e-11
13.72	1.7614e-11	1.72251e-11
13.74	1.76131e-11	1.72184e-11
13.76	1.76151e-11	1.72196e-11
13.78	1.76102e-11	1.72127e-11
13.8	1.76117e-11	1.72189e-11
13.82	1.76154e-11	1.72145e-11
13.84	1.76159e-11	1.7212e-11
13.86	1.76122e-11	1.72163e-11
13.88	1.76195e-11	1.72156e-11
13.9	1.76164e-11	1.72154e-11
13.92	1.76155e-11	1.72129e-11
13.94	1.76206e-11	1.72172e-11
13.96	1.76159e-11	1.72164e-11
13.98	1.76177e-11	1.72195e-11
14	1.76162e-11	1.7218e-11
14.02	1.76217e-11	1.72125e-11
14.04	1.76215e-11	1.72212e-11
14.06	1.76258e-11	1.72169e-11
14.08	1.76217e-11	1.72205e-11
14.1	1.76217e-11	1.72155e-11
14.12	1.76177e-11	1.72218e-11
14.14	1.76224e-11	1.72194e-11
14.16	1.76168e-11	1.72233e-11
14.18	1.762e-11	1.72198e-11
14.2	1.76214e-11	1.72173e-11
14.22	1.76223e-11	1.72248e-11
14.24	1.76242e-11	1.72233e-11
14.26	1.76202e-11	1.72218e-11
14.28	1.76253e-11	1.72195e-11
14.3	1.76183e-11	1.72224e-11
14.32	1.76254e-11	1.72225e-11
14.34	1.76243e-11	1.72213e-11
14.36	1.76222e-11	1.72239e-11
14.38	1.76255e-11	1.72268e-11
14.4	1.7624e-11	1.72255e-11
14.42	1.76228e-11	1.72235e-11
14.44	1.7622e-11	1.72237e-11
14.46	1.76229e-11	1.72304e-11
14.48	1.76248e-11	1.72263e-11
14.5	1.76266e-11	1.72249e-11
14.52	1.76288e-11	1.72289e-11
14.54	1.76285e-11	1.72289e-11
14.56	1.76242e-11	1.72313e-11
14.58	1.76327e-11	1.7232e-11
14.6	1.763e-11	1.72324e-11
14.62	1.76289e-11	1.72308e-11
14.64	1.76297e-11	1.72264e-11
14.66	1.76261e-11	1.7233e-11
14.68	1.76293e-11	1.72338e-11
14.7	1.76288e-11	1.72287e-11
14.72	1.76283e-11	1.72273e-11
14.74	1.76272e-11	1.72311e-11
14.76	1.76298e-11	1.72315e-11
14.78	1.76315e-11	1.72325e-11
14.8	1.76342e-11	1.72407e-11
14.82	1.76281e-11	1.72355e-11
14.84	1.7627e-11	1.72357e-11
14.86	1.76265e-11	1.72367e-11
14.88	1.76327e-11	1.72373e-11
14.9	1.7631e-11	1.72421e-11
14.92	1.76287e-11	1.72393e-11
14.94	1.76337e-11	1.72371e-11
14.96	1.76319e-11	1.72378e-11
14.98	1.76266e-11	1.72382e-11
15	1.76303e-11	1.72345e-11
15.02	1.76313e-11	1.72411e-11
15.04	1.76374e-11	1.72408e-11
15.06	1.76359e-11	1.72461e-11
15.08	1.76329e-11	1.72441e-11
15.1	1.76337e-11	1.72409e-11
15.12	1.76334e-11	1.72382e-11
15.14	1.76383e-11	1.72407e-11
15.16	1.76279e-11	1.7246e-11
15.18	1.76338e-11	1.72427e-11
15.2	1.76316e-11	1.72434e-11
15.22	1.76361e-11	1.72471e-11
15.24	1.76363e-11	1.72473e-11
15.26	1.76345e-11	1.72464e-11
15.28	1.76406e-11	1.72487e-11
15.3	1.76335e-11	1.72492e-11
15.32	1.76329e-11	1.72534e-11
15.34	1.76336e-11	1.72461e-11
15.36	1.76348e-11	1.72481e-11
15.38	1.76317e-11	1.72484e-11
15.4	1.76337e-11	1.72477e-11
15.42	1.76356e-11	1.72523e-11
15.44	1.76339e-11	1.72537e-11
15.46	1.76357e-11	1.72566e-11
15.48	1.76351e-11	1.72496e-11
15.5	1.76375e-11	1.72517e-11
15.52	1.76338e-11	1.72522e-11
15.54	1.76334e-11	1.72517e-11
15.56	1.7638e-11	1.72534e-11
15.58	1.76344e-11	1.72536e-11
15.6	1.76313e-11	1.72556e-11
15.62	1.76317e-11	1.72564e-11
15.64	1.76305e-11	1.72534e-11
15.66	1.76319e-11	1.72567e-11
15.68	1.76338e-11	1.72626e-11
15.7	1.76305e-11	1.72626e-11
15.72	1.76286e-11	1.72603e-11
15.74	1.76315e-11	1.72612e-11
15.76	1.76258e-11	1.72622e-11
15.78	1.76363e-11	1.72645e-11
15.8	1.76323e-11	1.7259e-11
15.82	1.76303e-11	1.72617e-11
15.84	1.7632e-11	1.72678e-11
15.86	1.7632e-11	1.72638e-11
15.88	1.76292e-11	1.72654e-11
15.9	1.76279e-11	1.72622e-11
15.92	1.76292e-11	1.72637e-11
15.94	1.76279e-11	1.72684e-11
15.96	1.76296e-11	1.72688e-11
15.98	1.76281e-11	1.72703e-11
16	1.7632e-11	1.72664e-11
16.02	1.76313e-11	1.72654e-11
16.04	1.76291e-11	1.72653e-11
16.06	1.76269e-11	1.72719e-11
16.08	1.76307e-11	1.7271e-11
16.1	1.76325e-11	1.72677e-11
16.12	1.76281e-11	1.72752e-11
16.14	1.76308e-11	1.72714e-11
16.16	1.76365e-11	1.72744e-11
16.18	1.76296e-11	1.72741e-11
16.2	1.76284e-11	1.72743e-11
16.22	1.76337e-11	1.72734e-11
16.24	1.76312e-11	1.72749e-11
16.26	1.76308e-11	1.72794e-11
16.28	1.76297e-11	1.72754e-11
16.3	1.76343e-11	1.72752e-11
16.32	1.76298e-11	1.72784e-11
16.34	1.76321e-11	1.7276e-11
16.36	1.7629e-11	1.72776e-11
16.38	1.76303e-11	1.72798e-11
16.4	1.76307e-11	1.72792e-11
16.42	1.76376e-11	1.72857e-11
16.44	1.76307e-11	1.72823e-11
16.46	1.76326e-11	1.7282e-11
16.48	1.76321e-11	1.72867e-11
16.5	1.76336e-11	1.72876e-11
16.52	1.76298e-11	1.72863e-11
16.54	1.76347e-11	1.72857e-11
16.56	1.76304e-11	1.72886e-11
16.58	1.76336e-11	1.72916e-11
16.6	1.76325e-11	1.72906e-11
16.62	1.76328e-11	1.72862e-11
16.64	1.76308e-11	1.72869e-11
16.66	1.76289e-11	1.72849e-11
16.68	1.76337e-11	1.72807e-11
16.7	1.76305e-11	1.72851e-11
16.72	1.76315e-11	1.72846e-11
16.74	1.76322e-11	1.72913e-11
16.76	1.76351e-11	1.72881e-11
16.78	1.76361e-11	1.72897e-11
16.8	1.76394e-11	1.72825e-11
16.82	1.76372e-11	1.72875e-11
16.84	1.76347e-11	1.72908e-11
16.86	1.76359e-11	1.72918e-11
16.88	1.76398e-11	1.73006e-11
16.9	1.76398e-11	1.72975e-11
16.92	1.76337e-11	1.72923e-11
16.94	1.76399e-11	1.72958e-11
16.96	1.76382e-11	1.7293e-11
16.98	1.76343e-11	1.72988e-11
17	1.76341e-11	1.72959e-11
17.02	1.76339e-11	1.72967e-11
17.04	1.76368e-11	1.72937e-11
17.06	1.76356e-11	1.72957e-11
17.08	1.76404e-11	1.72926e-11
17.1	1.76386e-11	1.73005e-11
17.12	1.76427e-11	1.72956e-11
17.14	1.76474e-11	1.73027e-11
17.16	1.76407e-11	1.7302e-11
17.18	1.76412e-11	1.72995e-11
17.2	1.7645e-11	1.7305e-11
17.22	1.76431e-11	1.72971e-11
17.24	1.76412e-11	1.72982e-11
17.26	1.76389e-11	1.73014e-11
17.28	1.76431e-11	1.73017e-11
17.3	1.76389e-11	1.73006e-11
17.32	1.76427e-11	1.73061e-11
17.34	1.76472e-11	1.73017e-11
17.36	1.76466e-11	1.73089e-11
17.38	1.76381e-11	1.73063e-11
17.4	1.76427e-11	1.7309e-11
17.42	1.76416e-11	1.73073e-11
17.44	1.76402e-11	1.7308e-11
17.46	1.7646e-11	1.73059e-11
17.48	1.76461e-11	1.73059e-11
17.5	1.76478e-11	1.73074e-11
17.52	1.76433e-11	1.73067e-11
17.54	1.76409e-11	1.7306e-11
17.56	1.76427e-11	1.73102e-11
17.58	1.76429e-11	1.73089e-11
17.6	1.76434e-11	1.73154e-11
17.62	1.76433e-11	1.73184e-11
17.64	1.76436e-11	1.73108e-11
17.66	1.7642e-11	1.73174e-11
17.68	1.76429e-11	1.73148e-11
17.7	1.7645e-11	1.73122e-11
17.72	1.76463e-11	1.73116e-11
17.74	1.76428e-11	1.73151e-11
17.76	1.76479e-11	1.73216e-11
17.78	1.76404e-11	1.73199e-11
17.8	1.7647e-11	1.73168e-11
17.82	1.76447e-11	1.73153e-11
17.84	1.76407e-11	1.73141e-11
17.86	1.76463e-11	1.73175e-11
17.88	1.76457e-11	1.73236e-11
17.9	1.76451e-11	1.73156e-11
17.92	1.76477e-11	1.73122e-11
17.94	1.76454e-11	1.73201e-11
17.96	1.76433e-11	1.73237e-11
17.98	1.76444e-11	1.73177e-11
18	1.7644e-11	1.73221e-11
18.02	1.76461e-11	1.73208e-11
18.04		1.73239e-11
18.06		1.7325e-11
18.08		1.7321e-11
18.1		1.73256e-11
18.12		1.73237e-11
18.14		1.73237e-11
18.16		1.73248e-11
18.18		1.73249e-11
18.2		1.73246e-11
18.22		1.73254e-11
18.24		1.73245e-11
18.26		1.73294e-11
18.28		1.73222e-11
18.3		1.73234e-11
18.32		1.73318e-11
18.34		1.73316e-11
18.36		1.73273e-11
18.38		1.73273e-11
18.4		1.73267e-11
18.42		1.73276e-11
18.44		1.73316e-11
18.46		1.73313e-11
18.48		1.73384e-11
18.5		1.73315e-11
18.52		1.73413e-11
18.54		1.73366e-11
18.56		1.73376e-11
18.58		1.73341e-11
18.6		1.73406e-11
18.62		1.73373e-11
18.64		1.73349e-11
18.66		1.734e-11
18.68		1.73427e-11
18.7		1.73384e-11
18.72		1.7342e-11
18.74		1.73371e-11
18.76		1.73429e-11
18.78		1.73437e-11
18.8		1.73411e-11
18.82		1.7339e-11
18.84		1.73369e-11
18.86		1.73427e-11
18.88		1.73403e-11
18.9		1.73443e-11
18.92		1.73449e-11
18.94		1.73457e-11
18.96		1.73439e-11
18.98		1.73466e-11
19		1.73402e-11
19.02		1.73415e-11
19.04		1.73461e-11
19.06		1.73442e-11
19.08		1.73473e-11
19.1		1.73473e-11
19.12		1.73502e-11
19.14		1.73501e-11
19.16		1.7348e-11
19.18		1.73436e-11
19.2		1.73509e-11
19.22		1.735e-11
19.24		1.73472e-11
19.26		1.73491e-11
19.28		1.73515e-11
19.3		1.7352e-11
19.32		1.73511e-11
19.34		1.7354e-11
19.36		1.73521e-11
19.38		1.73496e-11
19.4		1.73508e-11
19.42		1.73514e-11
19.44		1.73534e-11
19.46		1.73494e-11
19.48		1.73515e-11
19.5		1.73513e-11
19.52		1.7355e-11
19.54		1.73577e-11
19.56		1.73579e-11
19.58		1.73532e-11
19.6		1.73589e-11
19.62		1.73524e-11
19.64		1.73528e-11
19.66		1.73567e-11
19.68		1.73513e-11
19.7		1.73543e-11
19.72		1.73553e-11
19.74		1.73567e-11
19.76		1.73567e-11
19.78		1.73609e-11
19.8		1.73589e-11
19.82		1.73608e-11
19.84		1.73616e-11
19.86		1.73582e-11
19.88		1.73558e-11
19.9		1.73599e-11
19.92		1.73592e-11
19.94		1.73559e-11
19.96		1.73632e-11
19.98		1.73621e-11
20		1.73641e-11
20.02		1.73606e-11
20.04		1.73619e-11
20.06		1.73638e-11
20.08		1.73619e-11
20.1		1.73619e-11
20.12		1.73623e-11
20.14		1.73632e-11
20.16		1.73632e-11
20.18		1.7365e-11
20.2		1.7366e-11
20.22		1.73677e-11
20.24		1.73656e-11
20.26		1.73671e-11
20.28		1.73655e-11
20.3		1.73684e-11
20.32		1.73702e-11
20.34		1.73675e-11
20.36		1.73696e-11
20.38		1.73685e-11
20.4		1.73688e-11
20.42		1.73676e-11
20.44		1.73685e-11
20.46		1.73663e-11
20.48		1.73702e-11
20.5		1.73709e-11
20.52		1.73675e-11
20.54		1.7368e-11
20.56		1.73727e-11
20.58		1.73697e-11
20.6		1.73764e-11
20.62		1.73756e-11
20.64		1.73702e-11
20.66		1.73693e-11
20.68		1.73776e-11
20.7		1.73743e-11
20.72		1.73704e-11
20.74		1.73738e-11
20.76		1.73744e-11
20.78		1.7373e-11
20.8		1.73787e-11
20.82		1.73781e-11
20.84		1.73758e-11
20.86		1.73773e-11
20.88		1.73769e-11
20.9		1.73779e-11
20.92		1.7378e-11
20.94		1.73752e-11
20.96		1.7373e-11
20.98		1.738e-11
21		1.73729e-11
21.02		1.73774e-11
21.04		1.73873e-11
21.06		1.73823e-11
21.08		1.73793e-11
21.1		1.738e-11
21.12		1.73773e-11
21.14		1.73824e-11
21.16		1.73834e-11
21.18		1.7379e-11
21.2		1.73836e-11
21.22		1.73789e-11
21.24		1.73814e-11
21.26		1.73792e-11
21.28		1.73836e-11
21.3		1.7384e-11
21.32		1.73852e-11
21.34		1.73813e-11
21.36		1.73884e-11
21.38		1.73831e-11
21.4		1.73871e-11
21.42		1.73836e-11
21.44		1.73872e-11
21.46		1.73831e-11
21.48		1.73918e-11
21.5		1.73829e-11
21.52		1.73824e-11
21.54		1.73809e-11
21.56		1.73839e-11
21.58		1.73873e-11
21.6		1.73819e-11
21.62		1.73886e-11
21.64		1.73894e-11
21.66		1.73897e-11
21.68		1.73858e-11
21.7		1.73864e-11
21.72		1.73906e-11
21.74		1.73924e-11
21.76		1.73847e-11
21.78		1.7383e-11
21.8		1.73891e-11
21.82		1.73884e-11
21.84		1.73875e-11
21.86		1.7388e-11
21.88		1.73924e-11
21.9		1.73891e-11
21.92		1.73935e-11
21.94		1.73901e-11
21.96		1.739e-11
21.98		1.73907e-11
22		1.73888e-11
22.02		1.73869e-11
22.04		1.73896e-11
22.06		1.73954e-11
22.08		1.73938e-11
22.1		1.7396e-11
22.12		1.73927e-11
22.14		1.73918e-11
22.16		1.73957e-11
22.18		1.73951e-11
22.2		1.73959e-11
22.22		1.73925e-11
22.24		1.73989e-11
22.26		1.73963e-11
22.28		1.73951e-11
22.3		1.73929e-11
22.32		1.73917e-11
22.34		1.73973e-11
22.36		1.73959e-11
22.38		1.73954e-11
22.4		1.73939e-11
22.42		1.73907e-11
22.44		1.74016e-11
22.46		1.73994e-11
22.48		1.73972e-11
22.5		1.73982e-11
22.52		1.7397e-11
22.54		1.74023e-11
22.56		1.74009e-11
22.58		1.73986e-11
22.6		1.73967e-11
22.62		1.73985e-11
22.64		1.74003e-11
22.66		1.74029e-11
22.68		1.74038e-11
22.7		1.74001e-11
22.72		1.74037e-11
22.74		1.7404e-11
22.76		1.73988e-11
22.78		1.74003e-11
22.8		1.74052e-11
22.82		1.74015e-11
22.84		1.74005e-11
22.86		1.74002e-11
22.88		1.74071e-11
22.9		1.74003e-11
22.92		1.73972e-11
22.94		1.74033e-11
22.96		1.74036e-11
22.98		1.73982e-11
23		1.74076e-11
23.02		1.74044e-11
23.04		1.74035e-11
23.06		1.74051e-11
23.08		1.74055e-11
23.1		1.74048e-11
23.12		1.74057e-11
23.14		1.74022e-11
23.16		1.7405e-11
23.18		1.74004e-11
23.2		1.74038e-11
23.22		1.74087e-11
23.24		1.74072e-11
23.26		1.74109e-11
23.28		1.74033e-11
23.3		1.74044e-11
23.32		1.74082e-11
23.34		1.74026e-11
23.36		1.74127e-11
23.38		1.74045e-11
23.4		1.7409e-11
23.42		1.74085e-11
23.44		1.74105e-11
23.46		1.74101e-11
23.48		1.74111e-11
23.5		1.74095e-11
23.52		1.7407e-11
23.54		1.74129e-11
23.56		1.74093e-11
23.58		1.74064e-11
23.6		1.74116e-11
23.62		1.74091e-11
23.64		1.74162e-11
23.66		1.7418e-11
23.68		1.74124e-11
23.7		1.74105e-11
23.72		1.74153e-11
23.74		1.74121e-11
23.76		1.74148e-11
23.78		1.74199e-11
23.8		1.74136e-11
23.82		1.74149e-11
23.84		1.74126e-11
23.86		1.74141e-11
23.88		1.74123e-11
23.9		1.74133e-11
23.92		1.74139e-11
23.94		1.74157e-11
23.96		1.7416e-11
23.98		1.74121e-11
24		1.74133e-11
24.02		1.74147e-11
24.04		1.74147e-11
24.06		1.74123e-11
24.08		1.74177e-11
24.1		1.74164e-11
24.12		1.74183e-11
24.14		1.7414e-11
24.16		1.74175e-11
24.18		1.74213e-11
24.2		1.7417e-11
24.22		1.74143e-11
24.24		1.74172e-11
24.26		1.74167e-11
24.28		1.74144e-11
24.3		1.74132e-11
24.32		1.74184e-11
24.34		1.74151e-11
24.36		1.74176e-11
24.38		1.74221e-11
24.4		1.74142e-11
24.42		1.742e-11
24.44		1.74202e-11
24.46		1.74201e-11
24.48		1.74164e-11
24.5		1.74178e-11
24.52		1.7421e-11
24.54		1.74182e-11
24.56		1.74182e-11
24.58		1.74223e-11
24.6		1.74208e-11
24.62		1.74215e-11
24.64		1.74233e-11
24.66		1.74256e-11
24.68		1.74214e-11
24.7		1.74217e-11
24.72		1.74228e-11
24.74		1.74276e-11
24.76		1.74224e-11
24.78		1.74221e-11
24.8		1.74212e-11
24.82		1.74249e-11
24.84		1.7426e-11
24.86		1.74265e-11
24.88		1.74245e-11
24.9		1.74221e-11
24.92		1.74254e-11
24.94		1.74224e-11
24.96		1.74246e-11
24.98		1.74245e-11
25		1.74233e-11
25.02		1.74239e-11
25.04		1.7426e-11
25.06		1.74327e-11
25.08		1.74237e-11
25.1		1.74242e-11
25.12		1.74273e-11
25.14		1.74255e-11
25.16		1.74293e-11
25.18		1.7427e-11
25.2		1.74246e-11
25.22		1.74271e-11
25.24		1.74265e-11
25.26		1.74253e-11
25.28		1.74268e-11
25.3		1.74279e-11
25.32		1.74284e-11
25.34		1.74286e-11
25.36		1.74301e-11
25.38		1.7429e-11
25.4		1.74274e-11
25.42		1.74253e-11
25.44		1.74272e-11
25.46		1.74312e-11
25.48		1.74297e-11
25.5		1.74273e-11
25.52		1.74277e-11
25.54		1.74298e-11
25.56		1.74275e-11
25.58		1.74291e-11
25.6		1.74324e-11
25.62		1.74323e-11
25.64		1.74317e-11
25.66		1.74309e-11
25.68		1.74274e-11
25.7		1.74393e-11
25.72		1.74333e-11
25.74		1.74318e-11
25.76		1.7432e-11
25.78		1.74311e-11
25.8		1.74319e-11
25.82		1.74354e-11
25.84		1.74356e-11
25.86		1.74357e-11
25.88		1.74336e-11
25.9		1.74277e-11
25.92		1.74334e-11
25.94		1.7432e-11
25.96		1.74268e-11
25.98		1.74364e-11
26		1.74364e-11
26.02		1.74292e-11
26.04		1.74366e-11
26.06		1.74306e-11
26.08		1.7435e-11
26.1		1.74349e-11
26.12		1.74358e-11
26.14		1.74339e-11
26.16		1.74368e-11
26.18		1.74332e-11
26.2		1.74397e-11
26.22		1.74335e-11
26.24		1.74333e-11
26.26		1.74376e-11
26.28		1.74339e-11
26.3		1.74366e-11
26.32		1.74356e-11
26.34		1.74354e-11
26.36		1.74387e-11
26.38		1.74394e-11
26.4		1.74363e-11
26.42		1.74351e-11
26.44		1.74391e-11
26.46		1.74361e-11
26.48		1.74382e-11
26.5		1.74368e-11
26.52		1.7434e-11
26.54		1.74327e-11
26.56		1.74416e-11
26.58		1.74352e-11
26.6		1.7434e-11
26.62		1.74388e-11
26.64		1.74363e-11
26.66		1.74395e-11
26.68		1.74375e-11
26.7		1.74385e-11
26.72		1.74424e-11
26.74		1.74402e-11
26.76		1.74418e-11
26.78		1.74365e-11
26.8		1.74395e-11
26.82		1.74397e-11
26.84		1.7438e-11
26.86		1.74408e-11
26.88		1.74417e-11
26.9		1.74415e-11
26.92		1.74376e-11
26.94		1.7439e-11
26.96		1.74378e-11
26.98		1.74391e-11
27		1.74418e-11
27.02		1.74381e-11
27.04		1.74399e-11
27.06		1.74409e-11
27.08		1.74478e-11
27.1		1.74446e-11
27.12		1.74467e-11
27.14		1.74433e-11
27.16		1.74466e-11
27.18		1.74429e-11
27.2		1.7444e-11
27.22		1.74473e-11
27.24		1.7444e-11
27.26		1.74443e-11
27.28		1.74415e-11
27.3		1.74441e-11
27.32		1.74441e-11
27.34		1.74433e-11
27.36		1.74404e-11
27.38		1.74431e-11
27.4		1.74426e-11
27.42		1.74376e-11
27.44		1.74455e-11
27.46		1.74374e-11
27.48		1.74459e-11
27.5		1.74458e-11
27.52		1.74472e-11
27.54		1.74462e-11
27.56		1.7446e-11
27.58		1.74436e-11
27.6		1.74432e-11
27.62		1.74444e-11
27.64		1.74449e-11
27.66		1.74502e-11
27.68		1.74448e-11
27.7		1.74436e-11
27.72		1.74433e-11
27.74		1.74457e-11
27.76		1.74431e-11
27.78		1.74435e-11
27.8		1.74448e-11
27.82		1.74439e-11
27.84		1.74453e-11
27.86		1.7446e-11
27.88		1.74472e-11
27.9		1.74399e-11
27.92		1.7443e-11
27.94		1.7445e-11
27.96		1.74471e-11
27.98		1.74481e-11
28		1.74443e-11
28.02		1.74455e-11
28.04		1.74488e-11
28.06		1.74479e-11
28.08		1.7447e-11
28.1		1.74509e-11
28.12		1.74448e-11
28.14		1.74504e-11
28.16		1.74461e-11
28.18		1.745e-11
28.2		1.74486e-11
28.22		1.7447e-11
28.24		1.74473e-11
28.26		1.74481e-11
28.28		1.74503e-11
28.3		1.7449e-11
28.32		1.74479e-11
28.34		1.74478e-11
28.36		1.7451e-11
28.38		1.74481e-11
28.4		1.74499e-11
28.42		1.74465e-11
28.44		1.74464e-11
28.46		1.74524e-11
28.48		1.7453e-11
28.5		1.74485e-11
28.52		1.74499e-11
28.54		1.74526e-11
28.56		1.74496e-11
28.58		1.74469e-11
28.6		1.74501e-11
28.62		1.74466e-11
28.64		1.74507e-11
28.66		1.74436e-11
28.68		1.74498e-11
28.7		1.74518e-11
28.72		1.74479e-11
28.74		1.74513e-11
28.76		1.74564e-11
28.78		1.74551e-11
28.8		1.74551e-11
28.82		1.74511e-11
28.84		1.7454e-11
28.86		1.74589e-11
28.88		1.74566e-11
28.9		1.74576e-11
28.92		1.74527e-11
28.94		1.74472e-11
28.96		1.74506e-11
28.98		1.74544e-11
29		1.74489e-11
29.02		1.7453e-11
29.04		1.74574e-11
29.06		1.7455e-11
29.08		1.74573e-11
29.1		1.74574e-11
29.12		1.74536e-11
29.14		1.74586e-11
29.16		1.74594e-11
29.18		1.7456e-11
29.2		1.74636e-11
29.22		1.74572e-11
29.24		1.74592e-11
29.26		1.74557e-11
29.28		1.74598e-11
29.3		1.74634e-11
29.32		1.74567e-11
29.34		1.74569e-11
29.36		1.74607e-11
29.38		1.74617e-11
29.4		1.74624e-11
29.42		1.74586e-11
29.44		1.74566e-11
29.46		1.7458e-11
29.48		1.74596e-11
29.5		1.74616e-11
29.52		1.74615e-11
29.54		1.74618e-11
29.56		1.74588e-11
29.58		1.74653e-11
29.6		1.74607e-11
29.62		1.74613e-11
29.64		1.74586e-11
29.66		1.74604e-11
29.68		1.74596e-11
29.7		1.74642e-11
29.72		1.74591e-11
29.74		1.74594e-11
29.76		1.74612e-11
29.78		1.7465e-11
29.8		1.74594e-11
29.82		1.74616e-11
29.84		1.74633e-11
29.86		1.74619e-11
29.88		1.74637e-11
29.9		1.74618e-11
29.92		1.74619e-11
29.94		1.74621e-11
29.96		1.74642e-11
29.98		1.74623e-11
30		1.74667e-11
30.02		1.74609e-11
30.04		1.74618e-11
30.06		1.74617e-11
30.08		1.74636e-11
30.1		1.74613e-11
30.12		1.7462e-11
30.14		1.74623e-11
30.16		1.74627e-11
30.18		1.74606e-11
30.2		1.74631e-11
30.22		1.7464e-11
30.24		1.74636e-11
30.26		1.74636e-11
30.28		1.74621e-11
30.3		1.74676e-11
30.32		1.74686e-11
30.34		1.74641e-11
30.36		1.74639e-11
30.38		1.74689e-11
30.4		1.7468e-11
30.42		1.7466e-11
30.44		1.74632e-11
30.46		1.74655e-11
30.48		1.74687e-11
30.5		1.74718e-11
30.52		1.74649e-11
30.54		1.74615e-11
30.56		1.74673e-11
30.58		1.74679e-11
30.6		1.74692e-11
30.62		1.74621e-11
30.64		1.74693e-11
30.66		1.74694e-11
30.68		1.74664e-11
30.7		1.74703e-11
30.72		1.74639e-11
30.74		1.74705e-11
30.76		1.7472e-11
30.78		1.74681e-11
30.8		1.74674e-11
30.82		1.74672e-11
30.84		1.74658e-11
30.86		1.74738e-11
30.88		1.7468e-11
30.9		1.74739e-11
30.92		1.74699e-11
30.94		1.74717e-11
30.96		1.74706e-11
30.98		1.74672e-11
31		1.74714e-11
31.02		1.74733e-11
31.04
31.06
31.08
31.1
31.12
31.14
31.16
31.18
31.2
31.22
31.24
31.26
31.28
31.3
31.32
31.34
31.36
31.38
31.4
31.42
31.44
31.46
31.48
31.5
31.52
31.54
31.56
31.58
31.6
31.62
31.64
31.66
31.68
31.7
31.72
31.74
31.76
31.78
31.8
31.82
31.84
31.86
31.88
31.9
31.92
31.94
31.96
31.98
32
32.02
32.04
32.06
32.08
32.1
32.12
32.14
32.16
32.18
32.2
32.22
32.24
32.26
32.28
32.3
32.32
32.34
32.36
32.38
32.4
32.42
32.44
32.46
32.48
32.5
32.52
32.54
32.56
32.58
32.6
32.62
32.64
32.66
32.68
32.7
32.72
32.74
32.76
32.78
32.8
32.82
32.84
32.86
32.88
32.9
32.92
32.94
32.96
32.98
33
33.02
33.04
33.06
33.08
33.1
33.12
33.14
33.16
33.18
33.2
33.22
33.24
33.26
33.28
33.3
33.32
33.34
33.36
33.38
33.4
33.42
33.44
33.46
33.48
33.5
33.52
33.54
33.56
33.58
33.6
33.62
33.64
33.66
33.68
33.7
33.72
33.74
33.76
33.78
33.8
33.82
33.84
33.86
33.88
33.9
33.92
33.94
33.96
33.98
34
34.02
34.04
34.06
34.08
34.1
34.12
34.14
34.16
34.18
34.2
34.22
34.24
34.26
34.28
34.3
34.32
34.34
34.36
34.38
34.4
34.42
34.44
34.46
34.48
34.5
34.52
34.54
34.56
34.58
34.6
34.62
34.64
34.66
34.68
34.7
34.72
34.74
34.76
34.78
34.8
34.82
34.84
34.86
34.88
34.9
34.92
34.94
34.96
34.98
35
35.02
35.04
35.06
35.08
35.1
35.12
35.14
35.16
35.18
35.2
35.22
35.24
35.26
35.28
35.3
35.32
35.34
35.36
35.38
35.4
35.42
35.44
35.46
35.48
35.5
35.52
35.54
35.56
35.58
35.6
35.62
35.64
35.66
35.68
35.7
35.72
35.74
35.76
35.78
35.8
35.82
35.84
35.86
35.88
35.9
35.92
35.94
35.96
35.98
36
36.02
36.04
36.06
36.08
36.1
36.12
36.14
36.16
36.18
36.2
36.22
36.24
36.26
36.28
36.3
36.32
36.34
36.36
36.38
36.4
36.42
36.44
36.46
36.48
36.5
36.52
36.54
36.56
36.58
36.6
36.62
36.64
36.66
36.68
36.7
36.72
36.74
36.76
36.78
36.8
36.82
36.84
36.86
36.88
36.9
36.92
36.94
36.96
36.98
37
37.02
37.04
37.06
37.08
37.1
37.12
37.14
37.16
37.18
37.2
37.22
37.24
37.26
37.28
37.3
37.32
37.34
37.36
37.38
37.4
37.42
37.44
37.46
37.48
37.5
37.52
37.54
37.56
37.58
37.6
37.62
37.64
37.66
37.68
37.7
37.72
37.74
37.76
37.78
37.8
37.82
37.84
37.86
37.88
37.9
37.92
37.94
37.96
37.98
38
38.02
38.04
38.06
38.08
38.1
38.12
38.14
38.16
38.18
38.2
38.22
38.24
38.26
38.28
38.3
38.32
38.34
38.36
38.38
38.4
38.42
38.44
38.46
38.48
38.5
38.52
38.54
38.56
38.58
38.6
38.62
38.64
38.66
38.68
38.7
38.72
38.74
38.76
38.78
38.8
38.82
38.84
38.86
38.88
38.9
38.92
38.94
38.96
38.98
39
39.02
39.04
39.06
39.08
39.1
39.12
39.14
39.16
39.18
39.2
39.22
39.24
39.26
39.28
39.3
39.32
39.34
39.36
39.38
39.4
39.42
39.44
39.46
39.48
39.5
39.52
39.54
39.56
39.58
39.6
39.62
39.64
39.66
39.68
39.7
39.72
39.74
39.76
39.78
39.8
39.82
39.84
39.86
39.88
39.9
39.92
39.94
39.96
[truncated: 4,002 more rows]

## Sheet: 16930168-175.abf
	Cm(F)
time (ms)	100uM 5-HT	100uM cocaine
0.02	1.72135e-11	1.74033e-11
0.04	1.72126e-11	1.74026e-11
0.06	1.72157e-11	1.74012e-11
0.08	1.72187e-11	1.73999e-11
0.1	1.72117e-11	1.74101e-11
0.12	1.72147e-11	1.74067e-11
0.14	1.72079e-11	1.7406e-11
0.16	1.72095e-11	1.74035e-11
0.18	1.72092e-11	1.74096e-11
0.2	1.72136e-11	1.74049e-11
0.22	1.72205e-11	1.74069e-11
0.24	1.72122e-11	1.74082e-11
0.26	1.72111e-11	1.74041e-11
0.28	1.7216e-11	1.7405e-11
0.3	1.72148e-11	1.74026e-11
0.32	1.72142e-11	1.74026e-11
0.34	1.72071e-11	1.74123e-11
0.36	1.72196e-11	1.74087e-11
0.38	1.72093e-11	1.74087e-11
0.4	1.7214e-11	1.74063e-11
0.42	1.72179e-11	1.74091e-11
0.44	1.72199e-11	1.74089e-11
0.46	1.72107e-11	1.74126e-11
0.48	1.72141e-11	1.74094e-11
0.5	1.72123e-11	1.74028e-11
0.52	1.72162e-11	1.74056e-11
0.54	1.72075e-11	1.74037e-11
0.56	1.7216e-11	1.74108e-11
0.58	1.7212e-11	1.74082e-11
0.6	1.72133e-11	1.74097e-11
0.62	1.72105e-11	1.74093e-11
0.64	1.72173e-11	1.74088e-11
0.66	1.72143e-11	1.74011e-11
0.68	1.72144e-11	1.74048e-11
0.7	1.72158e-11	1.74045e-11
0.72	1.72088e-11	1.74061e-11
0.74	1.72127e-11	1.7407e-11
0.76	1.72161e-11	1.74034e-11
0.78	1.72149e-11	1.74097e-11
0.8	1.72201e-11	1.74088e-11
0.82	1.72101e-11	1.74155e-11
0.84	1.72167e-11	1.74036e-11
0.86	1.72186e-11	1.74086e-11
0.88	1.72077e-11	1.74063e-11
0.9	1.72137e-11	1.74098e-11
0.92	1.72197e-11	1.74049e-11
0.94	1.7216e-11	1.74058e-11
0.96	1.72166e-11	1.74083e-11
0.98	1.72165e-11	1.74078e-11
1	1.72109e-11	1.74078e-11
1.02	1.72144e-11	1.74048e-11
1.04	1.72208e-11	1.74042e-11
1.06	1.72128e-11	1.74053e-11
1.08	1.72126e-11	1.74071e-11
1.1	1.72132e-11	1.74011e-11
1.12	1.72194e-11	1.74145e-11
1.14	1.7217e-11	1.74131e-11
1.16	1.72188e-11	1.74008e-11
1.18	1.72148e-11	1.74045e-11
1.2	1.72172e-11	1.74063e-11
1.22	1.7214e-11	1.7406e-11
1.24	1.72184e-11	1.74106e-11
1.26	1.72203e-11	1.7409e-11
1.28	1.722e-11	1.7407e-11
1.3	1.72123e-11	1.7406e-11
1.32	1.72151e-11	1.74117e-11
1.34	1.72154e-11	1.74158e-11
1.36	1.72172e-11	1.7408e-11
1.38	1.72215e-11	1.74133e-11
1.4	1.72245e-11	1.74145e-11
1.42	1.72203e-11	1.74118e-11
1.44	1.72247e-11	1.74141e-11
1.46	1.72168e-11	1.74149e-11
1.48	1.72138e-11	1.74126e-11
1.5	1.72182e-11	1.74125e-11
1.52	1.7213e-11	1.74113e-11
1.54	1.72175e-11	1.74146e-11
1.56	1.72182e-11	1.74075e-11
1.58	1.72176e-11	1.74119e-11
1.6	1.72241e-11	1.74116e-11
1.62	1.7225e-11	1.74109e-11
1.64	1.72212e-11	1.74136e-11
1.66	1.72198e-11	1.74154e-11
1.68	1.72265e-11	1.7415e-11
1.7	1.72263e-11	1.74145e-11
1.72	1.7219e-11	1.74178e-11
1.74	1.72154e-11	1.74061e-11
1.76	1.72285e-11	1.74155e-11
1.78	1.72246e-11	1.74142e-11
1.8	1.72204e-11	1.74185e-11
1.82	1.72197e-11	1.74166e-11
1.84	1.72308e-11	1.74159e-11
1.86	1.72208e-11	1.74102e-11
1.88	1.72257e-11	1.74157e-11
1.9	1.72267e-11	1.74168e-11
1.92	1.72226e-11	1.74138e-11
1.94	1.72209e-11	1.74078e-11
1.96	1.72236e-11	1.742e-11
1.98	1.72284e-11	1.74161e-11
2	1.72163e-11	1.7417e-11
2.02	1.72238e-11	1.74181e-11
2.04	1.72305e-11	1.74165e-11
2.06	1.72221e-11	1.74133e-11
2.08	1.72248e-11	1.74156e-11
2.1	1.72217e-11	1.74142e-11
2.12	1.72278e-11	1.74185e-11
2.14	1.72297e-11	1.74124e-11
2.16	1.72257e-11	1.7424e-11
2.18	1.72275e-11	1.74217e-11
2.2	1.72261e-11	1.74195e-11
2.22	1.72206e-11	1.74196e-11
2.24	1.72295e-11	1.7421e-11
2.26	1.72187e-11	1.74209e-11
2.28	1.72238e-11	1.74231e-11
2.3	1.72281e-11	1.7414e-11
2.32	1.72239e-11	1.74231e-11
2.34	1.72293e-11	1.74161e-11
2.36	1.72299e-11	1.74188e-11
2.38	1.72244e-11	1.74125e-11
2.4	1.72273e-11	1.74131e-11
2.42	1.72246e-11	1.74165e-11
2.44	1.72323e-11	1.74218e-11
2.46	1.72247e-11	1.74161e-11
2.48	1.72336e-11	1.74131e-11
2.5	1.72307e-11	1.74178e-11
2.52	1.7234e-11	1.74148e-11
2.54	1.72289e-11	1.74173e-11
2.56	1.72322e-11	1.74165e-11
2.58	1.72306e-11	1.74144e-11
2.6	1.72345e-11	1.74185e-11
2.62	1.72328e-11	1.7418e-11
2.64	1.7233e-11	1.74226e-11
2.66	1.72314e-11	1.74232e-11
2.68	1.7231e-11	1.74142e-11
2.7	1.7227e-11	1.74169e-11
2.72	1.72358e-11	1.74171e-11
2.74	1.72311e-11	1.74159e-11
2.76	1.72346e-11	1.74207e-11
2.78	1.72403e-11	1.74119e-11
2.8	1.72297e-11	1.74108e-11
2.82	1.72358e-11	1.74113e-11
2.84	1.72363e-11	1.74243e-11
2.86	1.7231e-11	1.74115e-11
2.88	1.72328e-11	1.74191e-11
2.9	1.72373e-11	1.74205e-11
2.92	1.72421e-11	1.7418e-11
2.94	1.72301e-11	1.74245e-11
2.96	1.72335e-11	1.74233e-11
2.98	1.7232e-11	1.7416e-11
3	1.72353e-11	1.74289e-11
3.02	1.72366e-11	1.74178e-11
3.04	1.72311e-11	1.74201e-11
3.06	1.72313e-11	1.74202e-11
3.08	1.723e-11	1.74159e-11
3.1	1.72332e-11	1.74214e-11
3.12	1.72396e-11	1.74129e-11
3.14	1.72322e-11	1.74175e-11
3.16	1.72265e-11	1.74194e-11
3.18	1.72286e-11	1.7419e-11
3.2	1.72355e-11	1.74126e-11
3.22	1.7229e-11	1.74161e-11
3.24	1.72355e-11	1.74269e-11
3.26	1.72358e-11	1.74211e-11
3.28	1.72372e-11	1.74238e-11
3.3	1.72349e-11	1.74226e-11
3.32	1.72328e-11	1.74223e-11
3.34	1.72383e-11	1.74207e-11
3.36	1.72359e-11	1.74202e-11
3.38	1.72367e-11	1.74211e-11
3.4	1.72395e-11	1.74266e-11
3.42	1.72382e-11	1.74198e-11
3.44	1.72425e-11	1.74258e-11
3.46	1.72367e-11	1.74213e-11
3.48	1.7238e-11	1.74174e-11
3.5	1.7239e-11	1.74205e-11
3.52	1.72397e-11	1.74193e-11
3.54	1.72431e-11	1.74241e-11
3.56	1.72363e-11	1.74212e-11
3.58	1.72343e-11	1.74233e-11
3.6	1.72358e-11	1.74204e-11
3.62	1.72382e-11	1.74225e-11
3.64	1.72401e-11	1.74226e-11
3.66	1.72411e-11	1.74282e-11
3.68	1.72402e-11	1.74151e-11
3.7	1.72428e-11	1.74226e-11
3.72	1.72419e-11	1.74265e-11
3.74	1.72377e-11	1.74258e-11
3.76	1.72401e-11	1.74184e-11
3.78	1.72431e-11	1.7428e-11
3.8	1.72398e-11	1.7422e-11
3.82	1.72419e-11	1.7425e-11
3.84	1.72393e-11	1.74244e-11
3.86	1.72394e-11	1.74243e-11
3.88	1.72423e-11	1.74251e-11
3.9	1.72438e-11	1.74302e-11
3.92	1.72336e-11	1.74234e-11
3.94	1.72411e-11	1.74249e-11
3.96	1.72371e-11	1.74239e-11
3.98	1.72364e-11	1.74258e-11
4	1.72416e-11	1.74312e-11
4.02	1.72497e-11	1.74249e-11
4.04	1.72438e-11	1.74242e-11
4.06	1.7239e-11	1.74257e-11
4.08	1.72464e-11	1.74225e-11
4.1	1.72442e-11	1.74202e-11
4.12	1.72466e-11	1.74218e-11
4.14	1.7247e-11	1.74294e-11
4.16	1.72467e-11	1.74249e-11
4.18	1.72458e-11	1.74238e-11
4.2	1.72422e-11	1.74235e-11
4.22	1.7236e-11	1.7422e-11
4.24	1.72414e-11	1.742e-11
4.26	1.72523e-11	1.74256e-11
4.28	1.72584e-11	1.74278e-11
4.3	1.72417e-11	1.74244e-11
4.32	1.71683e-11	1.74263e-11
4.34	1.71634e-11	1.74263e-11
4.36	1.71543e-11	1.74233e-11
4.38	1.71454e-11	1.74226e-11
4.4	1.71471e-11	1.74264e-11
4.42	1.71604e-11	1.74245e-11
4.44	1.71578e-11	1.74306e-11
4.46	1.71609e-11	1.74248e-11
4.48	1.71573e-11	1.7426e-11
4.5	1.71598e-11	1.74268e-11
4.52	1.71545e-11	1.74265e-11
4.54	1.71581e-11	1.74341e-11
4.56	1.71544e-11	1.74464e-11
4.58	1.71478e-11	1.74502e-11
4.6	1.71567e-11	1.74394e-11
4.62	1.71457e-11	1.74195e-11
4.64	1.71528e-11	1.73888e-11
4.66	1.71532e-11	1.73718e-11
4.68	1.71504e-11	1.73552e-11
4.7	1.71566e-11	1.73532e-11
4.72	1.71544e-11	1.7349e-11
4.74	1.71584e-11	1.73502e-11
4.76	1.7147e-11	1.73488e-11
4.78	1.71543e-11	1.73398e-11
4.8	1.71519e-11	1.73351e-11
4.82	1.71507e-11	1.73399e-11
4.84	1.71545e-11	1.73352e-11
4.86	1.71556e-11	1.73299e-11
4.88	1.7152e-11	1.73306e-11
4.9	1.71467e-11	1.73256e-11
4.92	1.71398e-11	1.73277e-11
4.94	1.71444e-11	1.73223e-11
4.96	1.71431e-11	1.73235e-11
4.98	1.71469e-11	1.73213e-11
5	1.71462e-11	1.73233e-11
5.02	1.71464e-11	1.73219e-11
5.04	1.71472e-11	1.73177e-11
5.06	1.71491e-11	1.73172e-11
5.08	1.71459e-11	1.73211e-11
5.1	1.71481e-11	1.73197e-11
5.12	1.71514e-11	1.73184e-11
5.14	1.71421e-11	1.73155e-11
5.16	1.71395e-11	1.7315e-11
5.18	1.71403e-11	1.73126e-11
5.2	1.71479e-11	1.73103e-11
5.22	1.71453e-11	1.73154e-11
5.24	1.71472e-11	1.73135e-11
5.26	1.71496e-11	1.73149e-11
5.28	1.71533e-11	1.73164e-11
5.3	1.71513e-11	1.73128e-11
5.32	1.71483e-11	1.73138e-11
5.34	1.71537e-11	1.73147e-11
5.36	1.71479e-11	1.73119e-11
5.38	1.71457e-11	1.73093e-11
5.4	1.71512e-11	1.73111e-11
5.42	1.71461e-11	1.73156e-11
5.44	1.71522e-11	1.73106e-11
5.46	1.71508e-11	1.73123e-11
5.48	1.71408e-11	1.73106e-11
5.5	1.71486e-11	1.73086e-11
5.52	1.71484e-11	1.73069e-11
5.54	1.71405e-11	1.73068e-11
5.56	1.715e-11	1.7318e-11
5.58	1.71445e-11	1.73143e-11
5.6	1.71437e-11	1.73055e-11
5.62	1.71475e-11	1.73115e-11
5.64	1.71434e-11	1.73071e-11
5.66	1.71448e-11	1.73059e-11
5.68	1.71416e-11	1.73068e-11
5.7	1.71424e-11	1.7304e-11
5.72	1.71515e-11	1.73106e-11
5.74	1.71463e-11	1.73062e-11
5.76	1.71248e-11	1.73027e-11
5.78	1.7144e-11	1.73067e-11
5.8	1.71222e-11	1.73133e-11
5.82	1.7126e-11	1.73084e-11
5.84	1.71162e-11	1.73067e-11
5.86	1.71214e-11	1.73092e-11
5.88	1.712e-11	1.73021e-11
5.9	1.71152e-11	1.73044e-11
5.92	1.71227e-11	1.7304e-11
5.94	1.71169e-11	1.73045e-11
5.96	1.71153e-11	1.73052e-11
5.98	1.71219e-11	1.73036e-11
6	1.71165e-11	1.73054e-11
6.02	1.71183e-11	1.7308e-11
6.04	1.71141e-11	1.7313e-11
6.06	1.7117e-11	1.7304e-11
6.08	1.71086e-11	1.73013e-11
6.1	1.71129e-11	1.73084e-11
6.12	1.71111e-11	1.73072e-11
6.14	1.71175e-11	1.73067e-11
6.16	1.71104e-11	1.73054e-11
6.18	1.71127e-11	1.73045e-11
6.2	1.71184e-11	1.7307e-11
6.22	1.712e-11	1.73035e-11
6.24	1.71191e-11	1.7301e-11
6.26	1.71189e-11	1.73014e-11
6.28	1.71127e-11	1.7303e-11
6.3	1.71132e-11	1.72992e-11
6.32	1.71158e-11	1.73093e-11
6.34	1.71118e-11	1.72989e-11
6.36	1.71108e-11	1.73033e-11
6.38	1.71124e-11	1.72963e-11
6.4	1.71171e-11	1.73005e-11
6.42	1.71144e-11	1.73027e-11
6.44	1.71144e-11	1.73057e-11
6.46	1.71129e-11	1.73066e-11
6.48	1.71225e-11	1.72968e-11
6.5	1.71119e-11	1.73017e-11
6.52	1.71144e-11	1.73092e-11
6.54	1.71174e-11	1.73048e-11
6.56	1.71173e-11	1.73073e-11
6.58	1.71159e-11	1.72993e-11
6.6	1.7112e-11	1.72967e-11
6.62	1.71121e-11	1.73e-11
6.64	1.7112e-11	1.73023e-11
6.66	1.71151e-11	1.72934e-11
6.68	1.71186e-11	1.72861e-11
6.7	1.71181e-11	1.72841e-11
6.72	1.7115e-11	1.7273e-11
6.74	1.71148e-11	1.72723e-11
6.76	1.71173e-11	1.72713e-11
6.78	1.71098e-11	1.727e-11
6.8	1.71175e-11	1.72666e-11
6.82	1.71111e-11	1.72738e-11
6.84	1.71126e-11	1.72699e-11
6.86	1.7109e-11	1.72646e-11
6.88	1.71168e-11	1.72695e-11
6.9	1.71071e-11	1.72726e-11
6.92	1.71168e-11	1.72732e-11
6.94	1.71176e-11	1.72686e-11
6.96	1.7113e-11	1.7266e-11
6.98	1.71137e-11	1.72727e-11
7	1.71162e-11	1.7264e-11
7.02	1.71114e-11	1.72687e-11
7.04	1.71096e-11	1.72704e-11
7.06	1.71128e-11	1.72768e-11
7.08	1.71106e-11	1.72738e-11
7.1	1.71263e-11	1.72773e-11
7.12	1.71293e-11	1.72742e-11
7.14	1.71417e-11	1.72767e-11
7.16	1.71486e-11	1.72788e-11
7.18	1.71469e-11	1.72697e-11
7.2	1.7137e-11	1.7279e-11
7.22	1.71347e-11	1.72712e-11
7.24	1.71393e-11	1.72582e-11
7.26	1.71338e-11	1.72606e-11
7.28	1.71329e-11	1.72599e-11
7.3	1.71321e-11	1.72599e-11
7.32	1.7137e-11	1.7264e-11
7.34	1.71328e-11	1.72568e-11
7.36	1.71377e-11	1.72591e-11
7.38	1.71365e-11	1.72671e-11
7.4	1.71357e-11	1.72702e-11
7.42	1.7139e-11	1.72656e-11
7.44	1.71404e-11	1.72605e-11
7.46	1.71316e-11	1.72688e-11
7.48	1.71329e-11	1.72755e-11
7.5	1.7135e-11	1.72656e-11
7.52	1.71391e-11	1.72591e-11
7.54	1.71361e-11	1.72651e-11
7.56	1.71303e-11	1.72522e-11
7.58	1.71349e-11	1.72498e-11
7.6	1.7138e-11	1.72435e-11
7.62	1.7129e-11	1.72455e-11
7.64	1.71344e-11	1.72441e-11
7.66	1.71386e-11	1.72518e-11
7.68	1.71355e-11	1.72506e-11
7.7	1.71398e-11	1.72523e-11
7.72	1.71419e-11	1.72487e-11
7.74	1.71414e-11	1.72564e-11
7.76	1.71405e-11	1.72513e-11
7.78	1.71391e-11	1.72549e-11
7.8	1.7133e-11	1.72449e-11
7.82	1.71264e-11	1.72551e-11
7.84	1.71365e-11	1.72498e-11
7.86	1.71333e-11	1.72522e-11
7.88	1.71388e-11	1.72503e-11
7.9	1.71359e-11	1.72596e-11
7.92	1.71353e-11	1.72525e-11
7.94	1.71388e-11	1.72548e-11
7.96	1.7138e-11	1.72505e-11
7.98	1.71382e-11	1.72478e-11
8	1.71402e-11	1.72509e-11
8.02	1.71367e-11	1.72531e-11
8.04	1.71407e-11	1.72592e-11
8.06	1.71367e-11	1.72592e-11
8.08	1.71421e-11	1.72515e-11
8.1	1.71393e-11	1.72538e-11
8.12	1.71373e-11	1.72534e-11
8.14	1.71315e-11	1.72507e-11
8.16	1.71394e-11	1.72472e-11
8.18	1.7133e-11	1.72537e-11
8.2	1.71423e-11	1.72491e-11
8.22	1.71383e-11	1.72452e-11
8.24	1.7138e-11	1.72459e-11
8.26	1.71379e-11	1.72441e-11
8.28	1.71407e-11	1.72465e-11
8.3	1.71696e-11	1.72478e-11
8.32	1.71811e-11	1.72455e-11
8.34	1.71799e-11	1.72479e-11
8.36	1.71784e-11	1.72423e-11
8.38	1.71865e-11	1.72442e-11
8.4	1.71809e-11	1.72425e-11
8.42	1.71798e-11	1.72482e-11
8.44	1.71894e-11	1.7242e-11
8.46	1.71802e-11	1.72383e-11
8.48	1.71741e-11	1.72451e-11
8.5	1.71763e-11	1.72474e-11
8.52	1.71837e-11	1.72454e-11
8.54	1.71882e-11	1.72413e-11
8.56	1.71881e-11	1.72481e-11
8.58	1.71839e-11	1.72875e-11
8.6	1.71739e-11	1.72627e-11
8.62	1.71837e-11	1.72654e-11
8.64	1.71817e-11	1.72747e-11
8.66	1.71852e-11	1.72659e-11
8.68	1.71852e-11	1.7265e-11
8.7	1.71843e-11	1.72734e-11
8.72	1.71796e-11	1.72744e-11
8.74	1.71817e-11	1.7263e-11
8.76	1.71875e-11	1.72663e-11
8.78	1.7184e-11	1.72679e-11
8.8	1.7184e-11	1.72728e-11
8.82	1.71844e-11	1.72741e-11
8.84	1.71845e-11	1.72741e-11
8.86	1.71829e-11	1.72757e-11
8.88	1.71893e-11	1.72729e-11
8.9	1.71904e-11	1.72708e-11
8.92	1.71831e-11	1.72671e-11
8.94	1.71899e-11	1.72678e-11
8.96	1.71845e-11	1.72736e-11
8.98	1.71872e-11	1.72737e-11
9	1.71854e-11	1.72672e-11
9.02	1.71757e-11	1.72709e-11
9.04	1.71873e-11	1.72731e-11
9.06	1.7186e-11	1.72677e-11
9.08	1.71869e-11	1.72685e-11
9.1	1.71878e-11	1.72633e-11
9.12	1.71883e-11	1.72758e-11
9.14	1.71915e-11	1.72669e-11
9.16	1.71842e-11	1.72686e-11
9.18	1.71823e-11	1.72697e-11
9.2	1.71833e-11	1.72648e-11
9.22	1.71945e-11	1.72628e-11
9.24	1.71833e-11	1.72685e-11
9.26	1.71844e-11	1.72728e-11
9.28	1.71871e-11	1.72669e-11
9.3	1.71914e-11	1.72733e-11
9.32	1.71903e-11	1.72695e-11
9.34	1.71838e-11	1.72668e-11
9.36	1.71839e-11	1.72688e-11
9.38	1.71869e-11	1.72712e-11
9.4	1.71917e-11	1.72683e-11
9.42	1.71929e-11	1.72696e-11
9.44	1.71891e-11	1.72655e-11
9.46	1.71887e-11	1.72646e-11
9.48	1.71932e-11	1.72688e-11
9.5	1.71833e-11	1.72699e-11
9.52	1.71908e-11	1.72703e-11
9.54	1.71956e-11	1.72682e-11
9.56	1.71905e-11	1.72742e-11
9.58	1.71874e-11	1.72656e-11
9.6	1.7186e-11	1.72676e-11
9.62	1.71903e-11	1.72728e-11
9.64	1.71899e-11	1.72681e-11
9.66	1.71843e-11	1.72688e-11
9.68	1.71883e-11	1.72695e-11
9.7	1.71882e-11	1.72673e-11
9.72	1.72014e-11	1.72648e-11
9.74	1.71482e-11	1.72678e-11
9.76	1.71415e-11	1.72689e-11
9.78	1.71481e-11	1.72649e-11
9.8	1.71469e-11	1.72685e-11
9.82	1.71436e-11	1.72704e-11
9.84	1.7148e-11	1.7266e-11
9.86	1.71448e-11	1.72639e-11
9.88	1.71438e-11	1.72692e-11
9.9	1.71479e-11	1.72661e-11
9.92	1.71421e-11	1.72671e-11
9.94	1.71394e-11	1.72655e-11
9.96	1.71398e-11	1.72661e-11
9.98	1.71416e-11	1.72731e-11
10	1.71356e-11	1.72681e-11
10.02	1.71425e-11	1.72634e-11
10.04	1.71427e-11	1.72619e-11
10.06	1.7129e-11	1.72703e-11
10.08	1.71348e-11	1.72683e-11
10.1	1.71341e-11	1.72685e-11
10.12	1.71396e-11	1.72666e-11
10.14	1.71417e-11	1.72651e-11
10.16	1.71444e-11	1.72688e-11
10.18	1.71415e-11	1.72638e-11
10.2	1.71391e-11	1.72634e-11
10.22	1.71335e-11	1.72679e-11
10.24	1.71406e-11	1.72693e-11
10.26	1.71487e-11	1.72646e-11
10.28	1.71384e-11	1.72617e-11
10.3	1.71405e-11	1.72662e-11
10.32	1.71333e-11	1.72634e-11
10.34	1.71337e-11	1.72692e-11
10.36	1.71328e-11	1.72673e-11
10.38	1.71428e-11	1.72658e-11
10.4	1.71444e-11	1.72725e-11
10.42	1.71428e-11	1.72707e-11
10.44	1.71412e-11	1.72618e-11
10.46	1.71388e-11	1.72668e-11
10.48	1.7136e-11	1.72673e-11
10.5	1.71347e-11	1.72661e-11
10.52	1.71355e-11	1.72669e-11
10.54	1.71376e-11	1.72608e-11
10.56	1.71402e-11	1.72648e-11
10.58	1.71312e-11	1.72625e-11
10.6	1.71291e-11	1.72644e-11
10.62	1.71355e-11	1.7265e-11
10.64	1.71356e-11	1.72721e-11
10.66	1.71392e-11	1.72666e-11
10.68	1.71334e-11	1.72662e-11
10.7	1.71311e-11	1.72659e-11
10.72	1.71405e-11	1.72702e-11
10.74	1.71327e-11	1.72658e-11
10.76	1.71351e-11	1.72676e-11
10.78	1.7133e-11	1.7266e-11
10.8	1.71361e-11	1.72903e-11
10.82	1.71393e-11	1.72777e-11
10.84	1.71375e-11	1.72859e-11
10.86	1.7137e-11	1.72892e-11
10.88	1.71435e-11	1.72863e-11
10.9	1.71406e-11	1.72865e-11
10.92	1.7131e-11	1.72899e-11
10.94	1.71391e-11	1.72848e-11
10.96	1.71454e-11	1.72918e-11
10.98	1.71365e-11	1.72933e-11
11	1.71399e-11	1.7286e-11
11.02	1.7139e-11	1.72877e-11
11.04	1.71343e-11	1.72927e-11
11.06	1.71379e-11	1.7294e-11
11.08	1.714e-11	1.7295e-11
11.1	1.7137e-11	1.72905e-11
11.12	1.71358e-11	1.73011e-11
11.14	1.71396e-11	1.72959e-11
11.16	1.71325e-11	1.72905e-11
11.18	1.71379e-11	1.7289e-11
11.2	1.71323e-11	1.72897e-11
11.22	1.71391e-11	1.72935e-11
11.24	1.71328e-11	1.72942e-11
11.26	1.71281e-11	1.72866e-11
11.28	1.71355e-11	1.72958e-11
11.3	1.71343e-11	1.72906e-11
11.32	1.71306e-11	1.73004e-11
11.34	1.71348e-11	1.72957e-11
11.36	1.7129e-11	1.73003e-11
11.38	1.71269e-11	1.72921e-11
11.4	1.71296e-11	1.72914e-11
11.42	1.71318e-11	1.72929e-11
11.44	1.71326e-11	1.72924e-11
11.46	1.71357e-11	1.7294e-11
11.48	1.71306e-11	1.7298e-11
11.5	1.71356e-11	1.7296e-11
11.52	1.71308e-11	1.72854e-11
11.54	1.71327e-11	1.72937e-11
11.56	1.71315e-11	1.7297e-11
11.58	1.71398e-11	1.72988e-11
11.6	1.71254e-11	1.72916e-11
11.62	1.71293e-11	1.72936e-11
11.64	1.7132e-11	1.72944e-11
11.66	1.71325e-11	1.72942e-11
11.68	1.71334e-11	1.7288e-11
11.7	1.71383e-11	1.72976e-11
11.72	1.71348e-11	1.7299e-11
11.74	1.71373e-11	1.72915e-11
11.76	1.7131e-11	1.73001e-11
11.78	1.71319e-11	1.72952e-11
11.8	1.7136e-11	1.72947e-11
11.82	1.7135e-11	1.72865e-11
11.84	1.71312e-11	1.7296e-11
11.86	1.71309e-11	1.72964e-11
11.88	1.71309e-11	1.72932e-11
11.9	1.71301e-11	1.72942e-11
11.92	1.71315e-11	1.72898e-11
11.94	1.71316e-11	1.72934e-11
11.96	1.71373e-11	1.72991e-11
11.98	1.71324e-11	1.72936e-11
12	1.71359e-11	1.72905e-11
12.02	1.71252e-11	1.7292e-11
12.04	1.71302e-11	1.72867e-11
12.06	1.71369e-11	1.72903e-11
12.08	1.71332e-11	1.72958e-11
12.1	1.71287e-11	1.73007e-11
12.12	1.71336e-11	1.72905e-11
12.14	1.71311e-11	1.72931e-11
12.16	1.71285e-11	1.72912e-11
12.18	1.71308e-11	1.72906e-11
12.2	1.71333e-11	1.72898e-11
12.22	1.71301e-11	1.72946e-11
12.24	1.71246e-11	1.72889e-11
12.26	1.71386e-11	1.72926e-11
12.28	1.7132e-11	1.72946e-11
12.3	1.71387e-11	1.72865e-11
12.32	1.71375e-11	1.72933e-11
12.34	1.71421e-11	1.72909e-11
12.36	1.71374e-11	1.72905e-11
12.38	1.71355e-11	1.72927e-11
12.4	1.71342e-11	1.72908e-11
12.42	1.71483e-11	1.72941e-11
12.44	1.7138e-11	1.72913e-11
12.46	1.71325e-11	1.72879e-11
12.48	1.71338e-11	1.72964e-11
12.5	1.71371e-11	1.72943e-11
12.52	1.71413e-11	1.72985e-11
12.54	1.71387e-11	1.72934e-11
12.56	1.71397e-11	1.72914e-11
12.58	1.71293e-11	1.73014e-11
12.6	1.7138e-11	1.72993e-11
12.62	1.71382e-11	1.72877e-11
12.64	1.71405e-11	1.7287e-11
12.66	1.71337e-11	1.72864e-11
12.68	1.71291e-11	1.72966e-11
12.7	1.71289e-11	1.72948e-11
12.72	1.71343e-11	1.72906e-11
12.74	1.71337e-11	1.72903e-11
12.76	1.71378e-11	1.72922e-11
12.78	1.71367e-11	1.72918e-11
12.8	1.71317e-11	1.72903e-11
12.82	1.71373e-11	1.72926e-11
12.84	1.71327e-11	1.72924e-11
12.86	1.71344e-11	1.72954e-11
12.88	1.71347e-11	1.72849e-11
12.9	1.71338e-11	1.72884e-11
12.92	1.71354e-11	1.72947e-11
12.94	1.71388e-11	1.72945e-11
12.96	1.71322e-11	1.72866e-11
12.98	1.71307e-11	1.73168e-11
13	1.71334e-11	1.72728e-11
13.02	1.71329e-11	1.72694e-11
13.04	1.71378e-11	1.72669e-11
13.06	1.71311e-11	1.72692e-11
13.08	1.71322e-11	1.72659e-11
13.1	1.71236e-11	1.72731e-11
13.12	1.71335e-11	1.72742e-11
13.14	1.71342e-11	1.72657e-11
13.16	1.71353e-11	1.72727e-11
13.18	1.71352e-11	1.72694e-11
13.2	1.71345e-11	1.72704e-11
13.22	1.71286e-11	1.72681e-11
13.24	1.71342e-11	1.72681e-11
13.26	1.71306e-11	1.72704e-11
13.28	1.71315e-11	1.72695e-11
13.3	1.71391e-11	1.72709e-11
13.32	1.71306e-11	1.72656e-11
13.34	1.71286e-11	1.72709e-11
13.36	1.71367e-11	1.72678e-11
13.38	1.71315e-11	1.72656e-11
13.4	1.71306e-11	1.72697e-11
13.42	1.71321e-11	1.72633e-11
13.44	1.71351e-11	1.72738e-11
13.46	1.71335e-11	1.7267e-11
13.48	1.71328e-11	1.72719e-11
13.5	1.71406e-11	1.72691e-11
13.52	1.71351e-11	1.72678e-11
13.54	1.7135e-11	1.72708e-11
13.56	1.71306e-11	1.72709e-11
13.58	1.71331e-11	1.72698e-11
13.6	1.71316e-11	1.72712e-11
13.62	1.71302e-11	1.72659e-11
13.64	1.71327e-11	1.7273e-11
13.66	1.71312e-11	1.72675e-11
13.68	1.71342e-11	1.72688e-11
13.7	1.7129e-11	1.72693e-11
13.72	1.71344e-11	1.727e-11
13.74	1.71308e-11	1.72707e-11
13.76	1.71391e-11	1.72713e-11
13.78	1.7139e-11	1.72722e-11
13.8	1.71346e-11	1.72759e-11
13.82	1.71347e-11	1.72716e-11
13.84	1.71324e-11	1.72698e-11
13.86	1.71302e-11	1.72695e-11
13.88	1.71319e-11	1.72656e-11
13.9	1.7133e-11	1.72661e-11
13.92	1.71359e-11	1.72716e-11
13.94	1.71341e-11	1.72708e-11
13.96	1.71283e-11	1.72697e-11
13.98	1.71351e-11	1.72748e-11
14	1.71295e-11	1.72708e-11
14.02	1.71349e-11	1.72737e-11
14.04	1.71362e-11	1.72649e-11
14.06	1.71362e-11	1.72729e-11
14.08	1.71364e-11	1.72675e-11
14.1	1.71294e-11	1.72688e-11
14.12	1.71346e-11	1.72723e-11
14.14	1.71334e-11	1.7267e-11
14.16	1.71391e-11	1.72725e-11
14.18	1.71322e-11	1.72671e-11
14.2	1.71377e-11	1.72714e-11
14.22	1.71398e-11	1.72682e-11
14.24	1.7131e-11	1.7272e-11
14.26	1.71497e-11	1.72711e-11
14.28	1.71609e-11	1.72733e-11
14.3	1.71564e-11	1.72704e-11
14.32	1.71501e-11	1.72789e-11
14.34	1.71404e-11	1.7267e-11
14.36	1.7145e-11	1.72684e-11
14.38	1.7143e-11	1.72724e-11
14.4	1.71472e-11	1.72745e-11
14.42	1.71484e-11	1.72711e-11
14.44	1.71436e-11	1.72752e-11
14.46	1.71474e-11	1.72696e-11
14.48	1.71491e-11	1.72615e-11
14.5	1.71534e-11	1.72756e-11
14.52	1.71575e-11	1.72709e-11
14.54	1.7147e-11	1.72727e-11
14.56	1.71521e-11	1.72814e-11
14.58	1.71521e-11	1.72964e-11
14.6	1.71607e-11	1.72906e-11
14.62	1.71649e-11	1.72915e-11
14.64	1.71643e-11	1.72837e-11
14.66	1.71596e-11	1.72865e-11
14.68	1.71676e-11	1.72789e-11
14.7	1.71583e-11	1.7279e-11
14.72	1.71639e-11	1.72739e-11
14.74	1.71646e-11	1.72743e-11
14.76	1.71576e-11	1.72756e-11
14.78	1.71616e-11	1.72774e-11
14.8	1.7158e-11	1.72726e-11
14.82	1.71601e-11	1.72747e-11
14.84	1.71592e-11	1.72689e-11
14.86	1.7163e-11	1.72631e-11
14.88	1.71537e-11	1.72742e-11
14.9	1.71654e-11	1.7268e-11
14.92	1.71619e-11	1.72731e-11
14.94	1.71645e-11	1.72678e-11
14.96	1.71651e-11	1.72678e-11
14.98	1.71678e-11	1.72699e-11
15	1.71656e-11	1.72647e-11
15.02	1.7168e-11	1.72654e-11
15.04	1.71661e-11	1.72704e-11
15.06	1.71655e-11	1.72655e-11
15.08	1.7169e-11	1.72685e-11
15.1	1.71748e-11	1.72673e-11
15.12	1.71748e-11	1.7268e-11
15.14	1.71732e-11	1.72678e-11
15.16	1.71657e-11	1.72741e-11
15.18	1.71644e-11	1.72692e-11
15.2	1.71765e-11	1.72681e-11
15.22	1.71742e-11	1.7269e-11
15.24	1.71762e-11	1.72714e-11
15.26	1.71758e-11	1.72747e-11
15.28	1.71778e-11	1.72678e-11
15.3	1.71789e-11	1.72743e-11
15.32	1.71779e-11	1.72723e-11
15.34	1.71853e-11	1.727e-11
15.36	1.71813e-11	1.72703e-11
15.38	1.71855e-11	1.7269e-11
15.4	1.71833e-11	1.72705e-11
15.42	1.71811e-11	1.72706e-11
15.44	1.71865e-11	1.72744e-11
15.46	1.71869e-11	1.72683e-11
15.48	1.71881e-11	1.72699e-11
15.5	1.71818e-11	1.72692e-11
15.52	1.71828e-11	1.72747e-11
15.54	1.71885e-11	1.72829e-11
15.56	1.71903e-11	1.72703e-11
15.58	1.71882e-11	1.72679e-11
15.6	1.71904e-11	1.72721e-11
15.62	1.71852e-11	1.72698e-11
15.64	1.71966e-11	1.72766e-11
15.66	1.71957e-11	1.72708e-11
15.68	1.71988e-11	1.72761e-11
15.7	1.71992e-11	1.72762e-11
15.72	1.72057e-11	1.72722e-11
15.74	1.71952e-11	1.72708e-11
15.76	1.71944e-11	1.72721e-11
15.78	1.71961e-11	1.72647e-11
15.8	1.71969e-11	1.72765e-11
15.82	1.71906e-11	1.72761e-11
15.84	1.72023e-11	1.72716e-11
15.86	1.71961e-11	1.72833e-11
15.88	1.7201e-11	1.72787e-11
15.9	1.71945e-11	1.72779e-11
15.92	1.7209e-11	1.7273e-11
15.94	1.72091e-11	1.72745e-11
15.96	1.71979e-11	1.72764e-11
15.98	1.71982e-11	1.72774e-11
16	1.71992e-11	1.72746e-11
16.02	1.71997e-11	1.72727e-11
16.04	1.71973e-11	1.72719e-11
16.06	1.72036e-11	1.72841e-11
16.08	1.72095e-11	1.72789e-11
16.1	1.72034e-11	1.72792e-11
16.12	1.72002e-11	1.72764e-11
16.14	1.71996e-11	1.72826e-11
16.16	1.71984e-11	1.72757e-11
16.18	1.72013e-11	1.72777e-11
16.2	1.72013e-11	1.72848e-11
16.22	1.71986e-11	1.72786e-11
16.24	1.72053e-11	1.72865e-11
16.26	1.72014e-11	1.7282e-11
16.28	1.7207e-11	1.72754e-11
16.3	1.72095e-11	1.72776e-11
16.32	1.7202e-11	1.72797e-11
16.34	1.72068e-11	1.72786e-11
16.36	1.72095e-11	1.72798e-11
16.38	1.721e-11	1.72789e-11
16.4	1.72038e-11	1.72816e-11
16.42	1.72018e-11	1.72817e-11
16.44	1.72084e-11	1.72817e-11
16.46	1.72013e-11	1.72866e-11
16.48	1.72084e-11	1.72837e-11
16.5	1.72173e-11	1.72866e-11
16.52	1.72199e-11	1.72838e-11
16.54	1.72181e-11	1.72901e-11
16.56	1.72168e-11	1.72852e-11
16.58	1.72224e-11	1.7289e-11
16.6	1.72257e-11	1.72826e-11
16.62	1.72181e-11	1.72939e-11
16.64	1.72212e-11	1.72883e-11
16.66	1.72222e-11	1.72839e-11
16.68	1.72252e-11	1.72899e-11
16.7	1.72209e-11	1.72899e-11
16.72	1.72234e-11	1.72928e-11
16.74	1.72301e-11	1.72895e-11
16.76	1.72078e-11	1.72892e-11
16.78	1.72188e-11	1.72836e-11
16.8	1.7219e-11	1.72901e-11
16.82	1.72164e-11	1.72924e-11
16.84	1.72185e-11	1.7293e-11
16.86	1.722e-11	1.7289e-11
16.88	1.72177e-11	1.72864e-11
16.9	1.72236e-11	1.72916e-11
16.92	1.72262e-11	1.72939e-11
16.94	1.72214e-11	1.72875e-11
16.96	1.72202e-11	1.72907e-11
16.98	1.72192e-11	1.72861e-11
17	1.72212e-11	1.7293e-11
17.02	1.72252e-11	1.72877e-11
17.04	1.72255e-11	1.72907e-11
17.06	1.72158e-11	1.72859e-11
17.08	1.72223e-11	1.72898e-11
17.1	1.72232e-11	1.7297e-11
17.12	1.72268e-11	1.72926e-11
17.14	1.72224e-11	1.72967e-11
17.16	1.72326e-11	1.72954e-11
17.18	1.72366e-11	1.72907e-11
17.2	1.7227e-11	1.72911e-11
17.22	1.72284e-11	1.7294e-11
17.24	1.72275e-11	1.7291e-11
17.26	1.72256e-11	1.72996e-11
17.28	1.7231e-11	1.729e-11
17.3	1.72264e-11	1.72927e-11
17.32	1.72295e-11	1.72889e-11
17.34	1.72231e-11	1.72917e-11
17.36	1.72269e-11	1.72968e-11
17.38	1.7227e-11	1.73008e-11
17.4	1.72234e-11	1.72906e-11
17.42	1.72331e-11	1.72961e-11
17.44	1.72262e-11	1.72958e-11
17.46	1.72308e-11	1.73021e-11
17.48	1.72318e-11	1.73035e-11
17.5	1.72338e-11	1.7295e-11
17.52	1.72237e-11	1.73023e-11
17.54	1.72269e-11	1.7297e-11
17.56	1.72334e-11	1.72986e-11
17.58	1.72263e-11	1.72984e-11
17.6	1.72256e-11	1.73019e-11
17.62	1.72343e-11	1.72946e-11
17.64	1.72278e-11	1.72968e-11
17.66	1.72239e-11	1.73027e-11
17.68	1.72242e-11	1.72947e-11
17.7	1.7225e-11	1.72998e-11
17.72	1.72269e-11	1.72966e-11
17.74	1.7228e-11	1.7306e-11
17.76	1.72294e-11	1.73019e-11
17.78	1.72288e-11	1.73011e-11
17.8	1.72294e-11	1.73018e-11
17.82	1.72244e-11	1.73006e-11
17.84	1.7222e-11	1.73008e-11
17.86	1.72291e-11	1.73001e-11
17.88	1.72216e-11	1.73036e-11
17.9	1.72242e-11	1.73e-11
17.92	1.72185e-11	1.73001e-11
17.94	1.72196e-11	1.73047e-11
17.96	1.72238e-11	1.73041e-11
17.98	1.72223e-11	1.73064e-11
18	1.72226e-11	1.7307e-11
18.02	1.72272e-11	1.73059e-11
18.04	1.72175e-11	1.73086e-11
18.06	1.72299e-11	1.73007e-11
18.08	1.72265e-11	1.73042e-11
18.1	1.72324e-11	1.7303e-11
18.12	1.72351e-11	1.73015e-11
18.14	1.72285e-11	1.73061e-11
18.16	1.72334e-11	1.73023e-11
18.18	1.7237e-11	1.73052e-11
18.2	1.72342e-11	1.7303e-11
18.22	1.72305e-11	1.73043e-11
18.24	1.72254e-11	1.73112e-11
18.26	1.72307e-11	1.73048e-11
18.28	1.72364e-11	1.73074e-11
18.3	1.7232e-11	1.73024e-11
18.32	1.72305e-11	1.73135e-11
18.34	1.72346e-11	1.73123e-11
18.36	1.72299e-11	1.73075e-11
18.38	1.72313e-11	1.73098e-11
18.4	1.72359e-11	1.73139e-11
18.42	1.72376e-11	1.73052e-11
18.44	1.72353e-11	1.7313e-11
18.46	1.72342e-11	1.73129e-11
18.48	1.72362e-11	1.73183e-11
18.5	1.72302e-11	1.73105e-11
18.52	1.72337e-11	1.73129e-11
18.54	1.72379e-11	1.73164e-11
18.56	1.72447e-11	1.73161e-11
18.58	1.72374e-11	1.73118e-11
18.6	1.72445e-11	1.73144e-11
18.62	1.72373e-11	1.73158e-11
18.64	1.72345e-11	1.73144e-11
18.66	1.72318e-11	1.73174e-11
18.68	1.72401e-11	1.73174e-11
18.7	1.72333e-11	1.73199e-11
18.72	1.7239e-11	1.73156e-11
18.74	1.72355e-11	1.73184e-11
18.76	1.72419e-11	1.7316e-11
18.78	1.72393e-11	1.7317e-11
18.8	1.72396e-11	1.7313e-11
18.82	1.72354e-11	1.73155e-11
18.84	1.72378e-11	1.73158e-11
18.86	1.72295e-11	1.73129e-11
18.88	1.72381e-11	1.73142e-11
18.9	1.7239e-11	1.73231e-11
18.92	1.72395e-11	1.73187e-11
18.94	1.72431e-11	1.73177e-11
18.96	1.72311e-11	1.73184e-11
18.98	1.72397e-11	1.73133e-11
19	1.7246e-11	1.73145e-11
19.02	1.72308e-11	1.73176e-11
19.04	1.72366e-11	1.7317e-11
19.06	1.72378e-11	1.7319e-11
19.08	1.72338e-11	1.73112e-11
19.1	1.72408e-11	1.73207e-11
19.12	1.72372e-11	1.73194e-11
19.14	1.72454e-11	1.73254e-11
19.16	1.72478e-11	1.73212e-11
19.18	1.72345e-11	1.73268e-11
19.2	1.72378e-11	1.73146e-11
19.22	1.72379e-11	1.73164e-11
19.24	1.72446e-11	1.7315e-11
19.26	1.7245e-11	1.73198e-11
19.28	1.72404e-11	1.73213e-11
19.3	1.7247e-11	1.73176e-11
19.32	1.72486e-11	1.7323e-11
19.34	1.72429e-11	1.73151e-11
19.36	1.72463e-11	1.73238e-11
19.38	1.72381e-11	1.73194e-11
19.4	1.72491e-11	1.73305e-11
19.42	1.72457e-11	1.73208e-11
19.44	1.72411e-11	1.73245e-11
19.46	1.72483e-11	1.73272e-11
19.48	1.72508e-11	1.73274e-11
19.5	1.72454e-11	1.73295e-11
19.52	1.72572e-11	1.73274e-11
19.54	1.72469e-11	1.73245e-11
19.56	1.72504e-11	1.73238e-11
19.58	1.72534e-11	1.73276e-11
19.6	1.7251e-11	1.73248e-11
19.62	1.72543e-11	1.73285e-11
19.64	1.72507e-11	1.73236e-11
19.66	1.7252e-11	1.732e-11
19.68	1.7243e-11	1.73279e-11
19.7	1.7246e-11	1.73287e-11
19.72	1.72426e-11	1.73296e-11
19.74	1.72493e-11	1.73321e-11
19.76	1.72389e-11	1.73272e-11
19.78	1.72487e-11	1.73329e-11
19.8	1.72491e-11	1.73279e-11
19.82	1.72489e-11	1.73326e-11
19.84	1.72505e-11	1.73294e-11
19.86	1.72459e-11	1.73255e-11
19.88	1.72476e-11	1.73371e-11
19.9	1.72496e-11	1.73325e-11
19.92	1.72495e-11	1.73246e-11
19.94	1.72441e-11	1.73266e-11
19.96	1.72502e-11	1.73284e-11
19.98	1.72457e-11	1.73325e-11
20	1.72477e-11	1.73256e-11
20.02	1.72495e-11	1.73315e-11
20.04	1.72538e-11	1.7326e-11
20.06	1.7247e-11	1.73286e-11
20.08	1.72529e-11	1.73319e-11
20.1	1.72477e-11	1.73273e-11
20.12	1.7252e-11	1.73309e-11
20.14	1.72548e-11	1.73369e-11
20.16	1.72438e-11	1.73315e-11
20.18	1.72547e-11	1.73403e-11
20.2	1.725e-11	1.73313e-11
20.22	1.72548e-11	1.73354e-11
20.24	1.72506e-11	1.73363e-11
20.26	1.72468e-11	1.73364e-11
20.28	1.72525e-11	1.73293e-11
20.3	1.72485e-11	1.73333e-11
20.32	1.72607e-11	1.7332e-11
20.34	1.72522e-11	1.73355e-11
20.36	1.72507e-11	1.73332e-11
20.38	1.72472e-11	1.73316e-11
20.4	1.72547e-11	1.73335e-11
20.42	1.72512e-11	1.73323e-11
20.44	1.72497e-11	1.73414e-11
20.46	1.72431e-11	1.73365e-11
20.48	1.72419e-11	1.73355e-11
20.5	1.72557e-11	1.73395e-11
20.52	1.72549e-11	1.7337e-11
20.54	1.72616e-11	1.73361e-11
20.56	1.7258e-11	1.73381e-11
20.58	1.72589e-11	1.73393e-11
20.6	1.72543e-11	1.73307e-11
20.62	1.72533e-11	1.73326e-11
20.64	1.7255e-11	1.7334e-11
20.66	1.72612e-11	1.73407e-11
20.68	1.72508e-11	1.73322e-11
20.7	1.72589e-11	1.73377e-11
20.72	1.72534e-11	1.73359e-11
20.74	1.72547e-11	1.73428e-11
20.76	1.72571e-11	1.73382e-11
20.78	1.72598e-11	1.73351e-11
20.8	1.72526e-11	1.7337e-11
20.82	1.72533e-11	1.73343e-11
20.84	1.72592e-11	1.73391e-11
20.86	1.72544e-11	1.73415e-11
20.88	1.72537e-11	1.73401e-11
20.9	1.72557e-11	1.7338e-11
20.92	1.72528e-11	1.73439e-11
20.94	1.7255e-11	1.73423e-11
20.96	1.72554e-11	1.73383e-11
20.98	1.72565e-11	1.73418e-11
21	1.72493e-11	1.73433e-11
21.02	1.7251e-11	1.73397e-11
21.04	1.72555e-11	1.7345e-11
21.06	1.72546e-11	1.73443e-11
21.08	1.72556e-11	1.73386e-11
21.1	1.72621e-11	1.7344e-11
21.12	1.72525e-11	1.73381e-11
21.14	1.72652e-11	1.7339e-11
21.16	1.72615e-11	1.73395e-11
21.18	1.72515e-11	1.73422e-11
21.2	1.72599e-11	1.73422e-11
21.22	1.72567e-11	1.73371e-11
21.24	1.7254e-11	1.73466e-11
21.26	1.72532e-11	1.73339e-11
21.28	1.72579e-11	1.734e-11
21.3	1.72557e-11	1.73441e-11
21.32	1.72579e-11	1.73449e-11
21.34	1.72528e-11	1.73403e-11
21.36	1.7262e-11	1.73467e-11
21.38	1.72565e-11	1.73441e-11
21.4	1.7261e-11	1.7344e-11
21.42	1.72534e-11	1.73419e-11
21.44	1.7254e-11	1.73441e-11
21.46	1.72521e-11	1.73413e-11
21.48	1.72516e-11	1.73446e-11
21.5	1.72584e-11	1.7339e-11
21.52	1.72549e-11	1.7346e-11
21.54	1.72581e-11	1.73412e-11
21.56	1.72598e-11	1.73494e-11
21.58	1.72555e-11	1.73476e-11
21.6	1.72569e-11	1.73507e-11
21.62	1.72607e-11	1.73528e-11
21.64	1.72637e-11	1.73457e-11
21.66	1.72518e-11	1.73502e-11
21.68	1.72499e-11	1.73474e-11
21.7	1.72596e-11	1.73452e-11
21.72	1.72532e-11	1.73414e-11
21.74	1.72494e-11	1.73448e-11
21.76	1.72627e-11	1.73457e-11
21.78	1.72604e-11	1.73496e-11
21.8	1.72574e-11	1.73443e-11
21.82	1.72628e-11	1.73465e-11
21.84	1.727e-11	1.73451e-11
21.86	1.72674e-11	1.73497e-11
21.88	1.72612e-11	1.73463e-11
21.9	1.72651e-11	1.73483e-11
21.92	1.72717e-11	1.73476e-11
21.94	1.72677e-11	1.73472e-11
21.96	1.72605e-11	1.73498e-11
21.98	1.72645e-11	1.7349e-11
22	1.72645e-11	1.73489e-11
22.02	1.7267e-11	1.7351e-11
22.04	1.72635e-11	1.73502e-11
22.06	1.72679e-11	1.73535e-11
22.08	1.72727e-11	1.73488e-11
22.1	1.72667e-11	1.73518e-11
22.12	1.72662e-11	1.73542e-11
22.14	1.7266e-11	1.73511e-11
22.16	1.72643e-11	1.73517e-11
22.18	1.72608e-11	1.73505e-11
22.2	1.72685e-11	1.73491e-11
22.22	1.72684e-11	1.73532e-11
22.24	1.72645e-11	1.73496e-11
22.26	1.72664e-11	1.73567e-11
22.28	1.72684e-11	1.73525e-11
22.3	1.72677e-11	1.73535e-11
22.32	1.72676e-11	1.73471e-11
22.34	1.72609e-11	1.73542e-11
22.36	1.72608e-11	1.73489e-11
22.38	1.72634e-11	1.73531e-11
22.4	1.72647e-11	1.73565e-11
22.42	1.72664e-11	1.73534e-11
22.44	1.72608e-11	1.73486e-11
22.46	1.72683e-11	1.73553e-11
22.48	1.72675e-11	1.73565e-11
22.5	1.72679e-11	1.73564e-11
22.52	1.72709e-11	1.73573e-11
22.54	1.72726e-11	1.73549e-11
22.56	1.72693e-11	1.73615e-11
22.58	1.72634e-11	1.73565e-11
22.6	1.72677e-11	1.73514e-11
22.62	1.72669e-11	1.7354e-11
22.64	1.7272e-11	1.7357e-11
22.66	1.72694e-11	1.73476e-11
22.68	1.72665e-11	1.73614e-11
22.7	1.72733e-11	1.73581e-11
22.72	1.72633e-11	1.73557e-11
22.74	1.72681e-11	1.73599e-11
22.76	1.72734e-11	1.73606e-11
22.78	1.72671e-11	1.73498e-11
22.8	1.72672e-11	1.73607e-11
22.82	1.72717e-11	1.73585e-11
22.84	1.72737e-11	1.73589e-11
22.86	1.72708e-11	1.73556e-11
22.88	1.7272e-11	1.73551e-11
22.9	1.72665e-11	1.73532e-11
22.92	1.72684e-11	1.7357e-11
22.94	1.72655e-11	1.73594e-11
22.96	1.72667e-11	1.73597e-11
22.98	1.7263e-11	1.73549e-11
23	1.72577e-11	1.73511e-11
23.02	1.72635e-11	1.73512e-11
23.04		1.73563e-11
23.06		1.73574e-11
23.08		1.73593e-11
23.1		1.7358e-11
23.12		1.73618e-11
23.14		1.7364e-11
23.16		1.73654e-11
23.18		1.73646e-11
23.2		1.73588e-11
23.22		1.73639e-11
23.24		1.73652e-11
23.26		1.73543e-11
23.28		1.73603e-11
23.3		1.73619e-11
23.32		1.73552e-11
23.34		1.73666e-11
23.36		1.73629e-11
23.38		1.73589e-11
23.4		1.73588e-11
23.42		1.73721e-11
23.44		1.73654e-11
23.46		1.73622e-11
23.48		1.73611e-11
23.5		1.73636e-11
23.52		1.73633e-11
23.54		1.73642e-11
23.56		1.73704e-11
23.58		1.73624e-11
23.6		1.73601e-11
23.62		1.73667e-11
23.64		1.73642e-11
23.66		1.73701e-11
23.68		1.7366e-11
23.7		1.73636e-11
23.72		1.73679e-11
23.74		1.73633e-11
23.76		1.73643e-11
23.78		1.73661e-11
23.8		1.73677e-11
23.82		1.73661e-11
23.84		1.73611e-11
23.86		1.73687e-11
23.88		1.73654e-11
23.9		1.73685e-11
23.92		1.73678e-11
23.94		1.73596e-11
23.96		1.73659e-11
23.98		1.73689e-11
24		1.73664e-11
24.02		1.73669e-11
24.04		1.73693e-11
24.06		1.73723e-11
24.08		1.73676e-11
24.1		1.737e-11
24.12		1.73672e-11
24.14		1.73681e-11
24.16		1.73678e-11
24.18		1.73679e-11
24.2		1.73703e-11
24.22		1.73682e-11
24.24		1.73703e-11
24.26		1.73632e-11
24.28		1.73683e-11
24.3		1.73664e-11
24.32		1.7372e-11
24.34		1.73742e-11
24.36		1.73625e-11
24.38		1.73696e-11
24.4		1.73718e-11
24.42		1.73688e-11
24.44		1.73698e-11
24.46		1.73684e-11
24.48		1.73678e-11
24.5		1.73656e-11
24.52		1.73722e-11
24.54		1.73708e-11
24.56		1.73725e-11
24.58		1.73722e-11
24.6		1.73753e-11
24.62		1.73755e-11
24.64		1.73753e-11
24.66		1.73731e-11
24.68		1.73708e-11
24.7		1.73723e-11
24.72		1.73734e-11
24.74		1.73697e-11
24.76		1.73687e-11
24.78		1.73697e-11
24.8		1.73752e-11
24.82		1.73706e-11
24.84		1.73749e-11
24.86		1.73727e-11
24.88		1.73651e-11
24.9		1.73746e-11
24.92		1.73692e-11
24.94		1.73693e-11
24.96		1.73693e-11
24.98		1.7383e-11
25		1.73719e-11
25.02		1.73699e-11
25.04		1.7375e-11
25.06		1.73765e-11
25.08		1.73714e-11
25.1		1.73727e-11
25.12		1.73752e-11
25.14		1.73744e-11
25.16		1.73732e-11
25.18		1.73766e-11
25.2		1.7376e-11
25.22		1.73737e-11
25.24		1.73778e-11
25.26		1.73719e-11
25.28		1.73731e-11
25.3		1.73702e-11
25.32		1.73746e-11
25.34		1.7378e-11
25.36		1.73735e-11
25.38		1.73788e-11
25.4		1.73727e-11
25.42		1.73762e-11
25.44		1.73701e-11
25.46		1.738e-11
25.48		1.738e-11
25.5		1.73744e-11
25.52		1.73774e-11
25.54		1.73737e-11
25.56		1.73836e-11
25.58		1.7371e-11
25.6		1.73803e-11
25.62		1.7377e-11
25.64		1.73738e-11
25.66		1.73796e-11
25.68		1.7371e-11
25.7		1.73753e-11
25.72		1.73755e-11
25.74		1.73792e-11
25.76		1.73747e-11
25.78		1.73686e-11
25.8		1.73792e-11
25.82		1.73725e-11
25.84		1.73786e-11
25.86		1.73832e-11
25.88		1.73809e-11
25.9		1.73785e-11
25.92		1.73836e-11
25.94		1.73832e-11
25.96		1.73794e-11
25.98		1.7382e-11
26		1.73814e-11
26.02		1.73785e-11
26.04		1.73816e-11
26.06		1.73783e-11
26.08		1.73757e-11
26.1		1.73792e-11
26.12		1.7375e-11
26.14		1.73808e-11
26.16		1.73849e-11
26.18		1.7383e-11
26.2		1.7381e-11
26.22		1.73793e-11
26.24		1.73796e-11
26.26		1.73792e-11
26.28		1.73817e-11
26.3		1.73794e-11
26.32		1.73789e-11
26.34		1.73811e-11
26.36		1.73824e-11
26.38		1.7382e-11
26.4		1.73814e-11
26.42		1.73827e-11
26.44		1.73808e-11
26.46		1.73868e-11
26.48		1.73812e-11
26.5		1.73808e-11
26.52		1.73807e-11
26.54		1.73834e-11
26.56		1.73794e-11
26.58		1.73821e-11
26.6		1.73891e-11
26.62		1.738e-11
26.64		1.73784e-11
26.66		1.73834e-11
26.68		1.73812e-11
26.7		1.73818e-11
26.72		1.73855e-11
26.74		1.73849e-11
26.76		1.7388e-11
26.78		1.73853e-11
26.8		1.73876e-11
26.82		1.73786e-11
26.84		1.73836e-11
26.86		1.73871e-11
26.88		1.73844e-11
26.9		1.73816e-11
26.92		1.73854e-11
26.94		1.73862e-11
26.96		1.73844e-11
26.98		1.73869e-11
27		1.73791e-11
27.02		1.7382e-11
27.04		1.73862e-11
27.06		1.73787e-11
27.08		1.73858e-11
27.1		1.7386e-11
27.12		1.73871e-11
27.14		1.73817e-11
27.16		1.73829e-11
27.18		1.73808e-11
27.2		1.73905e-11
27.22		1.73876e-11
27.24		1.73886e-11
27.26		1.7388e-11
27.28		1.73857e-11
27.3		1.73843e-11
27.32		1.73835e-11
27.34		1.73894e-11
27.36		1.73822e-11
27.38		1.73846e-11
27.4		1.73907e-11
27.42		1.7384e-11
27.44		1.73833e-11
27.46		1.73831e-11
27.48		1.73899e-11
27.5		1.73804e-11
27.52		1.73865e-11
27.54		1.73905e-11
27.56		1.73885e-11
27.58		1.73891e-11
27.6		1.73938e-11
27.62		1.73911e-11
27.64		1.73842e-11
27.66		1.73942e-11
27.68		1.73842e-11
27.7		1.73919e-11
27.72		1.73882e-11
27.74		1.73855e-11
27.76		1.73871e-11
27.78		1.73899e-11
27.8		1.73835e-11
27.82		1.73835e-11
27.84		1.73939e-11
27.86		1.73826e-11
27.88		1.73844e-11
27.9		1.73877e-11
27.92		1.73892e-11
27.94		1.73886e-11
27.96		1.73845e-11
27.98		1.73938e-11
28		1.73903e-11
28.02		1.73826e-11
28.04		1.73875e-11
28.06		1.7386e-11
28.08		1.73853e-11
28.1		1.73844e-11
28.12		1.73896e-11
28.14		1.73947e-11
28.16		1.73834e-11
28.18		1.73885e-11
28.2		1.7386e-11
28.22		1.73867e-11
28.24		1.7388e-11
28.26		1.73836e-11
28.28		1.73943e-11
28.3		1.73879e-11
28.32		1.7393e-11
28.34		1.73896e-11
28.36		1.73883e-11
28.38		1.73895e-11
28.4		1.73895e-11
28.42		1.73918e-11
28.44		1.73948e-11
28.46		1.73898e-11
28.48		1.73886e-11
28.5		1.73834e-11
28.52		1.7387e-11
28.54		1.73857e-11
28.56		1.73864e-11
28.58		1.7392e-11
28.6		1.73909e-11
28.62		1.73901e-11
28.64		1.73914e-11
28.66		1.73915e-11
28.68		1.73939e-11
28.7		1.73905e-11
28.72		1.7394e-11
28.74		1.73931e-11
28.76		1.73893e-11
28.78		1.73907e-11
28.8		1.739e-11
28.82		1.73862e-11
28.84		1.73911e-11
28.86		1.73881e-11
28.88		1.73938e-11
28.9		1.73936e-11
28.92		1.73917e-11
28.94		1.73931e-11
28.96		1.73953e-11
28.98		1.73911e-11
29		1.73912e-11
29.02		1.73848e-11
29.04		1.73919e-11
29.06		1.73904e-11
29.08		1.7395e-11
29.1		1.739e-11
29.12		1.73973e-11
29.14		1.73891e-11
29.16		1.7389e-11
29.18		1.73945e-11
29.2		1.73939e-11
29.22		1.73916e-11
29.24		1.73897e-11
29.26		1.73964e-11
29.28		1.7394e-11
29.3		1.73881e-11
29.32		1.73987e-11
29.34		1.73983e-11
29.36		1.73933e-11
29.38		1.7394e-11
29.4		1.73917e-11
29.42		1.73965e-11
29.44		1.73956e-11
29.46		1.73973e-11
29.48		1.73942e-11
29.5		1.73984e-11
29.52		1.73948e-11
29.54		1.73909e-11
29.56		1.73977e-11
29.58		1.73961e-11
29.6		1.73985e-11
29.62		1.7393e-11
29.64		1.73909e-11
29.66		1.73938e-11
29.68		1.73963e-11
29.7		1.73913e-11
29.72		1.7394e-11
29.74		1.73874e-11
29.76		1.73966e-11
29.78		1.74013e-11
29.8		1.74007e-11
29.82		1.73978e-11
29.84		1.73962e-11
29.86		1.73984e-11
29.88		1.7395e-11
29.9		1.73985e-11
29.92		1.73954e-11
29.94		1.73943e-11
29.96		1.73955e-11
29.98		1.74e-11
30		1.73929e-11
30.02		1.74005e-11
30.04		1.73959e-11
30.06		1.73952e-11
30.08		1.73937e-11
30.1		1.73929e-11
30.12		1.73961e-11
30.14		1.73996e-11
30.16		1.73996e-11
30.18		1.73952e-11
30.2		1.73963e-11
30.22		1.73941e-11
30.24		1.73932e-11
30.26		1.73966e-11
30.28		1.73967e-11
30.3		1.73992e-11
30.32		1.73918e-11
30.34		1.74031e-11
30.36		1.73956e-11
30.38		1.73988e-11
30.4		1.73988e-11
30.42		1.73969e-11
30.44		1.74022e-11
30.46		1.74001e-11
30.48		1.73975e-11
30.5		1.74038e-11
30.52		1.73987e-11
30.54		1.73935e-11
30.56		1.73935e-11
30.58		1.73968e-11
30.6		1.73935e-11
30.62		1.73938e-11
30.64		1.74016e-11
30.66		1.73961e-11
30.68		1.7401e-11
30.7		1.74016e-11
30.72		1.73962e-11
30.74		1.73987e-11
30.76		1.73997e-11
30.78		1.73931e-11
30.8		1.73955e-11
30.82		1.73965e-11
30.84		1.73982e-11
30.86		1.74022e-11
30.88		1.73981e-11
30.9		1.74066e-11
30.92		1.7406e-11
30.94		1.7401e-11
30.96		1.74004e-11
30.98		1.74047e-11
31		1.74049e-11
31.02		1.74002e-11
31.04		1.74028e-11
31.06		1.74024e-11
31.08		1.73987e-11
31.1		1.73984e-11
31.12		1.73983e-11
31.14		1.74022e-11
31.16		1.74005e-11
31.18		1.7402e-11
31.2		1.74041e-11
31.22		1.74022e-11
31.24		1.73998e-11
31.26		1.74066e-11
31.28		1.74009e-11
31.3		1.7402e-11
31.32		1.73999e-11
31.34		1.74064e-11
31.36		1.74031e-11
31.38		1.74004e-11
31.4		1.74037e-11
31.42		1.74036e-11
31.44		1.74044e-11
31.46		1.74064e-11
31.48		1.74048e-11
31.5		1.74036e-11
31.52		1.74016e-11
31.54		1.74049e-11
31.56		1.74058e-11
31.58		1.74025e-11
31.6		1.74036e-11
31.62		1.74049e-11
31.64		1.74018e-11
31.66		1.73971e-11
31.68		1.74043e-11
31.7		1.74074e-11
31.72		1.74e-11
31.74		1.74007e-11
31.76		1.74037e-11
31.78		1.74064e-11
31.8		1.74014e-11
31.82		1.7403e-11
31.84		1.74055e-11
31.86		1.74011e-11
31.88		1.74081e-11
31.9		1.74033e-11
31.92		1.74037e-11
31.94		1.74041e-11
31.96		1.74062e-11
31.98		1.74014e-11
32		1.74113e-11
32.02		1.74033e-11
32.04
32.06
32.08
32.1
32.12
32.14
32.16
32.18
32.2
32.22
32.24
32.26
32.28
32.3
32.32
32.34
32.36
32.38
32.4
32.42
32.44
32.46
32.48
32.5
32.52
32.54
32.56
32.58
32.6
32.62
32.64
32.66
32.68
32.7
32.72
32.74
32.76
32.78
32.8
32.82
32.84
32.86
32.88
32.9
32.92
32.94
32.96
32.98
33
33.02
33.04
33.06
33.08
33.1
33.12
33.14
33.16
33.18
33.2
33.22
33.24
33.26
33.28
33.3
33.32
33.34
33.36
33.38
33.4
33.42
33.44
33.46
33.48
33.5
33.52
33.54
33.56
33.58
33.6
33.62
33.64
33.66
33.68
33.7
33.72
33.74
33.76
33.78
33.8
33.82
33.84
33.86
33.88
33.9
33.92
33.94
33.96
33.98
34
34.02
34.04
34.06
34.08
34.1
34.12
34.14
34.16
34.18
34.2
34.22
34.24
34.26
34.28
34.3
34.32
34.34
34.36
34.38
34.4
34.42
34.44
34.46
34.48
34.5
34.52
34.54
34.56
34.58
34.6
34.62
34.64
34.66
34.68
34.7
34.72
34.74
34.76
34.78
34.8
34.82
34.84
34.86
34.88
34.9
34.92
34.94
34.96
34.98
35
35.02
35.04
35.06
35.08
35.1
35.12
35.14
35.16
35.18
35.2
35.22
35.24
35.26
35.28
35.3
35.32
35.34
35.36
35.38
35.4
35.42
35.44
35.46
35.48
35.5
35.52
35.54
35.56
35.58
35.6
35.62
35.64
35.66
35.68
35.7
35.72
35.74
35.76
35.78
35.8
35.82
35.84
35.86
35.88
35.9
35.92
35.94
35.96
35.98
36
36.02
36.04
36.06
36.08
36.1
36.12
36.14
36.16
36.18
36.2
36.22
36.24
36.26
36.28
36.3
36.32
36.34
36.36
36.38
36.4
36.42
36.44
36.46
36.48
36.5
36.52
36.54
36.56
36.58
36.6
36.62
36.64
36.66
36.68
36.7
36.72
36.74
36.76
36.78
36.8
36.82
36.84
36.86
36.88
36.9
36.92
36.94
36.96
36.98
37
37.02
37.04
37.06
37.08
37.1
37.12
37.14
37.16
37.18
37.2
37.22
37.24
37.26
37.28
37.3
37.32
37.34
37.36
37.38
37.4
37.42
37.44
37.46
37.48
37.5
37.52
37.54
37.56
37.58
37.6
37.62
37.64
37.66
37.68
37.7
37.72
37.74
37.76
37.78
37.8
37.82
37.84
37.86
37.88
37.9
37.92
37.94
37.96
37.98
38
38.02
38.04
38.06
38.08
38.1
38.12
38.14
38.16
38.18
38.2
38.22
38.24
38.26
38.28
38.3
38.32
38.34
38.36
38.38
38.4
38.42
38.44
38.46
38.48
38.5
38.52
38.54
38.56
38.58
38.6
38.62
38.64
38.66
38.68
38.7
38.72
38.74
38.76
38.78
38.8
38.82
38.84
38.86
38.88
38.9
38.92
38.94
38.96
38.98
39
39.02
39.04
39.06
39.08
39.1
39.12
39.14
39.16
39.18
39.2
39.22
39.24
39.26
39.28
39.3
39.32
39.34
39.36
39.38
39.4
39.42
39.44
39.46
39.48
39.5
39.52
39.54
39.56
39.58
39.6
39.62
39.64
39.66
39.68
39.7
39.72
39.74
39.76
39.78
39.8
39.82
39.84
39.86
39.88
39.9
39.92
39.94
39.96
[truncated: 4,002 more rows]

## Sheet: 17n06002-027.abf
	Cm(F)
time (ms)	100uM 5-HT	100uM cocaine
0.02	1.85367e-11	1.8396e-11
0.04	1.85343e-11	1.83926e-11
0.06	1.85345e-11	1.83894e-11
0.08	1.85434e-11	1.83968e-11
0.1	1.85456e-11	1.83988e-11
0.12	1.85407e-11	1.83999e-11
0.14	1.8539e-11	1.83916e-11
0.16	1.8539e-11	1.83984e-11
0.18	1.85401e-11	1.83936e-11
0.2	1.8545e-11	1.83984e-11
0.22	1.85402e-11	1.84002e-11
0.24	1.85383e-11	1.83959e-11
0.26	1.85429e-11	1.83972e-11
0.28	1.85357e-11	1.83938e-11
0.3	1.85327e-11	1.84004e-11
0.32	1.85439e-11	1.83911e-11
0.34	1.85411e-11	1.83933e-11
0.36	1.85396e-11	1.83982e-11
0.38	1.85391e-11	1.84016e-11
0.4	1.85458e-11	1.83867e-11
0.42	1.85378e-11	1.83939e-11
0.44	1.85431e-11	1.83967e-11
0.46	1.85374e-11	1.83922e-11
0.48	1.85392e-11	1.83934e-11
0.5	1.85391e-11	1.83935e-11
0.52	1.85392e-11	1.84008e-11
0.54	1.8539e-11	1.83951e-11
0.56	1.85393e-11	1.83907e-11
0.58	1.85395e-11	1.83918e-11
0.6	1.85367e-11	1.83962e-11
0.62	1.85431e-11	1.83897e-11
0.64	1.85421e-11	1.83936e-11
0.66	1.8542e-11	1.83914e-11
0.68	1.85434e-11	1.839e-11
0.7	1.85454e-11	1.83947e-11
0.72	1.8543e-11	1.83947e-11
0.74	1.85391e-11	1.83939e-11
0.76	1.8546e-11	1.83964e-11
0.78	1.85446e-11	1.83897e-11
0.8	1.85412e-11	1.83925e-11
0.82	1.85416e-11	1.83881e-11
0.84	1.85423e-11	1.83942e-11
0.86	1.85406e-11	1.83956e-11
0.88	1.85402e-11	1.83932e-11
0.9	1.85419e-11	1.83942e-11
0.92	1.85421e-11	1.83908e-11
0.94	1.8543e-11	1.83937e-11
0.96	1.85418e-11	1.83998e-11
0.98	1.85479e-11	1.83939e-11
1	1.85437e-11	1.83951e-11
1.02	1.85386e-11	1.83883e-11
1.04	1.85463e-11	1.83959e-11
1.06	1.85424e-11	1.83918e-11
1.08	1.85406e-11	1.83975e-11
1.1	1.85451e-11	1.83933e-11
1.12	1.85465e-11	1.83946e-11
1.14	1.85391e-11	1.83928e-11
1.16	1.85417e-11	1.83932e-11
1.18	1.85419e-11	1.83895e-11
1.2	1.85431e-11	1.83881e-11
1.22	1.85491e-11	1.83914e-11
1.24	1.85466e-11	1.83945e-11
1.26	1.85393e-11	1.839e-11
1.28	1.85405e-11	1.83883e-11
1.3	1.85439e-11	1.83932e-11
1.32	1.85421e-11	1.83936e-11
1.34	1.85392e-11	1.83919e-11
1.36	1.85406e-11	1.83913e-11
1.38	1.85416e-11	1.83884e-11
1.4	1.85397e-11	1.83919e-11
1.42	1.85397e-11	1.83907e-11
1.44	1.85391e-11	1.83887e-11
1.46	1.85403e-11	1.83921e-11
1.48	1.85406e-11	1.83913e-11
1.5	1.85447e-11	1.83882e-11
1.52	1.85435e-11	1.83939e-11
1.54	1.85436e-11	1.83928e-11
1.56	1.85402e-11	1.83917e-11
1.58	1.85399e-11	1.83923e-11
1.6	1.85473e-11	1.83838e-11
1.62	1.85387e-11	1.83936e-11
1.64	1.85472e-11	1.83904e-11
1.66	1.85374e-11	1.83827e-11
1.68	1.85439e-11	1.83881e-11
1.7	1.85394e-11	1.83864e-11
1.72	1.85386e-11	1.83906e-11
1.74	1.85392e-11	1.83863e-11
1.76	1.85402e-11	1.83978e-11
1.78	1.85416e-11	1.83887e-11
1.8	1.85469e-11	1.83933e-11
1.82	1.85394e-11	1.83936e-11
1.84	1.85417e-11	1.83873e-11
1.86	1.85399e-11	1.83888e-11
1.88	1.85403e-11	1.83878e-11
1.9	1.8543e-11	1.83866e-11
1.92	1.85457e-11	1.83865e-11
1.94	1.85408e-11	1.83869e-11
1.96	1.85388e-11	1.83909e-11
1.98	1.85444e-11	1.83859e-11
2	1.8539e-11	1.83861e-11
2.02	1.85363e-11	1.83906e-11
2.04	1.85421e-11	1.83916e-11
2.06	1.85377e-11	1.83876e-11
2.08	1.85433e-11	1.83892e-11
2.1	1.85411e-11	1.83923e-11
2.12	1.85386e-11	1.8391e-11
2.14	1.85409e-11	1.83857e-11
2.16	1.85498e-11	1.83866e-11
2.18	1.85367e-11	1.83907e-11
2.2	1.85406e-11	1.83849e-11
2.22	1.85466e-11	1.83917e-11
2.24	1.85423e-11	1.83933e-11
2.26	1.85452e-11	1.83856e-11
2.28	1.85414e-11	1.83896e-11
2.3	1.8548e-11	1.83881e-11
2.32	1.85442e-11	1.83901e-11
2.34	1.85409e-11	1.83911e-11
2.36	1.85471e-11	1.83887e-11
2.38	1.8542e-11	1.83852e-11
2.4	1.85375e-11	1.83908e-11
2.42	1.85375e-11	1.83899e-11
2.44	1.85367e-11	1.83957e-11
2.46	1.8544e-11	1.83912e-11
2.48	1.85386e-11	1.83915e-11
2.5	1.85412e-11	1.83953e-11
2.52	1.85405e-11	1.83887e-11
2.54	1.85405e-11	1.83977e-11
2.56	1.85412e-11	1.8388e-11
2.58	1.85429e-11	1.83852e-11
2.6	1.85454e-11	1.83884e-11
2.62	1.85377e-11	1.83878e-11
2.64	1.85427e-11	1.83813e-11
2.66	1.85417e-11	1.8395e-11
2.68	1.85444e-11	1.83852e-11
2.7	1.85472e-11	1.83906e-11
2.72	1.85402e-11	1.83907e-11
2.74	1.85436e-11	1.8395e-11
2.76	1.85473e-11	1.83932e-11
2.78	1.8545e-11	1.83907e-11
2.8	1.85448e-11	1.8391e-11
2.82	1.85459e-11	1.83896e-11
2.84	1.85455e-11	1.83908e-11
2.86	1.85412e-11	1.8397e-11
2.88	1.85427e-11	1.83984e-11
2.9	1.85452e-11	1.83934e-11
2.92	1.854e-11	1.83892e-11
2.94	1.85457e-11	1.83903e-11
2.96	1.85433e-11	1.83856e-11
2.98	1.85522e-11	1.83929e-11
3	1.85455e-11	1.83889e-11
3.02	1.85473e-11	1.83939e-11
3.04	1.85445e-11	1.83963e-11
3.06	1.85414e-11	1.83909e-11
3.08	1.85429e-11	1.83938e-11
3.1	1.85468e-11	1.83919e-11
3.12	1.85388e-11	1.83861e-11
3.14	1.85462e-11	1.83936e-11
3.16	1.85403e-11	1.83833e-11
3.18	1.85426e-11	1.83863e-11
3.2	1.85366e-11	1.83936e-11
3.22	1.85453e-11	1.83897e-11
3.24	1.8547e-11	1.83851e-11
3.26	1.85372e-11	1.83857e-11
3.28	1.85488e-11	1.83889e-11
3.3	1.8541e-11	1.8395e-11
3.32	1.85406e-11	1.83904e-11
3.34	1.85399e-11	1.83917e-11
3.36	1.85407e-11	1.83915e-11
3.38	1.85465e-11	1.83901e-11
3.4	1.85463e-11	1.83878e-11
3.42	1.85433e-11	1.83905e-11
3.44	1.85426e-11	1.83878e-11
3.46	1.85401e-11	1.83893e-11
3.48	1.85463e-11	1.83933e-11
3.5	1.85509e-11	1.83924e-11
3.52	1.85453e-11	1.83915e-11
3.54	1.85434e-11	1.83926e-11
3.56	1.85456e-11	1.83869e-11
3.58	1.85432e-11	1.8394e-11
3.6	1.85454e-11	1.83943e-11
3.62	1.85464e-11	1.83909e-11
3.64	1.85424e-11	1.83981e-11
3.66	1.85486e-11	1.83919e-11
3.68	1.8553e-11	1.83896e-11
3.7	1.85447e-11	1.83944e-11
3.72	1.85477e-11	1.83887e-11
3.74	1.85418e-11	1.83939e-11
3.76	1.85442e-11	1.83908e-11
3.78	1.85506e-11	1.84021e-11
3.8	1.85499e-11	1.83936e-11
3.82	1.85462e-11	1.83941e-11
3.84	1.85489e-11	1.83977e-11
3.86	1.85403e-11	1.83937e-11
3.88	1.85498e-11	1.83923e-11
3.9	1.8544e-11	1.83961e-11
3.92	1.85419e-11	1.83996e-11
3.94	1.85506e-11	1.83968e-11
3.96	1.85445e-11	1.83881e-11
3.98	1.85498e-11	1.83966e-11
4	1.85437e-11	1.8393e-11
4.02	1.8547e-11	1.83923e-11
4.04	1.85491e-11	1.83914e-11
4.06	1.8551e-11	1.83979e-11
4.08	1.85479e-11	1.83942e-11
4.1	1.8541e-11	1.84018e-11
4.12	1.85468e-11	1.83953e-11
4.14	1.85467e-11	1.84008e-11
4.16	1.85451e-11	1.83942e-11
4.18	1.85415e-11	1.83887e-11
4.2	1.85493e-11	1.83977e-11
4.22	1.85449e-11	1.83978e-11
4.24	1.85438e-11	1.83903e-11
4.26	1.85513e-11	1.83985e-11
4.28	1.85456e-11	1.83945e-11
4.3	1.85464e-11	1.83975e-11
4.32	1.85468e-11	1.83972e-11
4.34	1.85442e-11	1.83988e-11
4.36	1.85511e-11	1.83951e-11
4.38	1.85456e-11	1.83897e-11
4.4	1.85534e-11	1.83941e-11
4.42	1.8542e-11	1.83985e-11
4.44	1.85516e-11	1.83921e-11
4.46	1.85541e-11	1.83996e-11
4.48	1.85477e-11	1.83992e-11
4.5	1.85411e-11	1.83936e-11
4.52	1.85465e-11	1.83978e-11
4.54	1.85498e-11	1.8396e-11
4.56	1.85454e-11	1.83934e-11
4.58	1.85469e-11	1.839e-11
4.6	1.85492e-11	1.83947e-11
4.62	1.85426e-11	1.83984e-11
4.64	1.8541e-11	1.84004e-11
4.66	1.8546e-11	1.83993e-11
4.68	1.85437e-11	1.83915e-11
4.7	1.85514e-11	1.83943e-11
4.72	1.85443e-11	1.83935e-11
4.74	1.85438e-11	1.83939e-11
4.76	1.85493e-11	1.83993e-11
4.78	1.85461e-11	1.83957e-11
4.8	1.8544e-11	1.84003e-11
4.82	1.8546e-11	1.83989e-11
4.84	1.85468e-11	1.83995e-11
4.86	1.85477e-11	1.83972e-11
4.88	1.85516e-11	1.83925e-11
4.9	1.85479e-11	1.83973e-11
4.92	1.85512e-11	1.8397e-11
4.94	1.85425e-11	1.83895e-11
4.96	1.85568e-11	1.8393e-11
4.98	1.85456e-11	1.83997e-11
5	1.85457e-11	1.83969e-11
5.02	1.85511e-11	1.83997e-11
5.04	1.85464e-11	1.83983e-11
5.06	1.8543e-11	1.84013e-11
5.08	1.85427e-11	1.83995e-11
5.1	1.85507e-11	1.84013e-11
5.12	1.85512e-11	1.84017e-11
5.14	1.85464e-11	1.83985e-11
5.16	1.8543e-11	1.83967e-11
5.18	1.85504e-11	1.83996e-11
5.2	1.85465e-11	1.83988e-11
5.22	1.85492e-11	1.83958e-11
5.24	1.85462e-11	1.83986e-11
5.26	1.85415e-11	1.83944e-11
5.28	1.85475e-11	1.83993e-11
5.3	1.85489e-11	1.84016e-11
5.32	1.85512e-11	1.8397e-11
5.34	1.85474e-11	1.83952e-11
5.36	1.85544e-11	1.84033e-11
5.38	1.85543e-11	1.83946e-11
5.4	1.85525e-11	1.84e-11
5.42	1.85506e-11	1.8391e-11
5.44	1.85503e-11	1.84003e-11
5.46	1.85515e-11	1.84003e-11
5.48	1.85516e-11	1.83958e-11
5.5	1.8555e-11	1.84033e-11
5.52	1.85491e-11	1.84037e-11
5.54	1.85525e-11	1.83999e-11
5.56	1.85463e-11	1.83936e-11
5.58	1.85474e-11	1.84009e-11
5.6	1.85537e-11	1.83954e-11
5.62	1.85491e-11	1.83996e-11
5.64	1.85506e-11	1.83951e-11
5.66	1.85502e-11	1.83981e-11
5.68	1.85587e-11	1.84015e-11
5.7	1.85495e-11	1.84031e-11
5.72	1.85547e-11	1.83921e-11
5.74	1.85509e-11	1.84011e-11
5.76	1.8551e-11	1.84022e-11
5.78	1.85524e-11	1.84e-11
5.8	1.85538e-11	1.83981e-11
5.82	1.85512e-11	1.83949e-11
5.84	1.85544e-11	1.8401e-11
5.86	1.85567e-11	1.83945e-11
5.88	1.85518e-11	1.84005e-11
5.9	1.85593e-11	1.83991e-11
5.92	1.8549e-11	1.83954e-11
5.94	1.85612e-11	1.84007e-11
5.96	1.85513e-11	1.84007e-11
5.98	1.8557e-11	1.83954e-11
6	1.85516e-11	1.83945e-11
6.02	1.8555e-11	1.83979e-11
6.04	1.85588e-11	1.84001e-11
6.06	1.85515e-11	1.83978e-11
6.08	1.8552e-11	1.83956e-11
6.1	1.85557e-11	1.83967e-11
6.12	1.85534e-11	1.83961e-11
6.14	1.85532e-11	1.84009e-11
6.16	1.85533e-11	1.83945e-11
6.18	1.85543e-11	1.83988e-11
6.2	1.85555e-11	1.8394e-11
6.22	1.85522e-11	1.84022e-11
6.24	1.85492e-11	1.83984e-11
6.26	1.8555e-11	1.84e-11
6.28	1.85537e-11	1.84006e-11
6.3	1.85529e-11	1.8398e-11
6.32	1.85542e-11	1.83987e-11
6.34	1.85595e-11	1.8397e-11
6.36	1.8553e-11	1.84029e-11
6.38	1.85541e-11	1.84029e-11
6.4	1.8559e-11	1.83918e-11
6.42	1.85541e-11	1.84041e-11
6.44	1.85522e-11	1.84044e-11
6.46	1.85475e-11	1.83991e-11
6.48	1.85593e-11	1.84002e-11
6.5	1.85517e-11	1.84028e-11
6.52	1.8556e-11	1.84081e-11
6.54	1.85565e-11	1.84024e-11
6.56	1.85589e-11	1.83974e-11
6.58	1.85545e-11	1.83945e-11
6.6	1.85487e-11	1.83957e-11
6.62	1.85559e-11	1.83948e-11
6.64	1.85572e-11	1.84051e-11
6.66	1.85569e-11	1.83978e-11
6.68	1.85632e-11	1.84008e-11
6.7	1.85453e-11	1.83999e-11
6.72	1.85519e-11	1.83967e-11
6.74	1.85559e-11	1.83956e-11
6.76	1.85564e-11	1.83956e-11
6.78	1.8561e-11	1.83958e-11
6.8	1.85548e-11	1.83973e-11
6.82	1.85577e-11	1.8401e-11
6.84	1.85551e-11	1.83993e-11
6.86	1.85525e-11	1.84004e-11
6.88	1.85577e-11	1.8403e-11
6.9	1.85596e-11	1.83964e-11
6.92	1.85538e-11	1.83951e-11
6.94	1.85587e-11	1.8396e-11
6.96	1.85631e-11	1.83977e-11
6.98	1.85521e-11	1.84051e-11
7	1.85589e-11	1.84008e-11
7.02	1.85523e-11	1.84015e-11
7.04	1.85546e-11	1.83989e-11
7.06	1.8556e-11	1.83959e-11
7.08	1.85548e-11	1.84021e-11
7.1	1.85614e-11	1.83965e-11
7.12	1.85566e-11	1.83994e-11
7.14	1.8558e-11	1.84059e-11
7.16	1.85545e-11	1.84006e-11
7.18	1.85532e-11	1.84029e-11
7.2	1.85557e-11	1.84009e-11
7.22	1.85548e-11	1.8399e-11
7.24	1.85516e-11	1.83992e-11
7.26	1.85567e-11	1.83943e-11
7.28	1.8556e-11	1.84042e-11
7.3	1.85638e-11	1.84089e-11
7.32	1.85554e-11	1.83994e-11
7.34	1.85588e-11	1.84007e-11
7.36	1.85597e-11	1.84039e-11
7.38	1.8555e-11	1.83999e-11
7.4	1.85604e-11	1.83965e-11
7.42	1.85525e-11	1.84009e-11
7.44	1.85573e-11	1.83968e-11
7.46	1.85595e-11	1.83996e-11
7.48	1.85564e-11	1.83984e-11
7.5	1.85611e-11	1.83987e-11
7.52	1.85539e-11	1.84056e-11
7.54	1.85545e-11	1.84043e-11
7.56	1.85575e-11	1.84084e-11
7.58	1.85551e-11	1.84057e-11
7.6	1.85615e-11	1.84023e-11
7.62	1.85525e-11	1.84027e-11
7.64	1.85528e-11	1.84e-11
7.66	1.85548e-11	1.8402e-11
7.68	1.85541e-11	1.83975e-11
7.7	1.85572e-11	1.83979e-11
7.72	1.85549e-11	1.84048e-11
7.74	1.85598e-11	1.83973e-11
7.76	1.85589e-11	1.83979e-11
7.78	1.85617e-11	1.84022e-11
7.8	1.85581e-11	1.84018e-11
7.82	1.85531e-11	1.83986e-11
7.84	1.8557e-11	1.84015e-11
7.86	1.85586e-11	1.84016e-11
7.88	1.8552e-11	1.83967e-11
7.9	1.85585e-11	1.84063e-11
7.92	1.85546e-11	1.84025e-11
7.94	1.85525e-11	1.84034e-11
7.96	1.85513e-11	1.83991e-11
7.98	1.85546e-11	1.84042e-11
8	1.85606e-11	1.84009e-11
8.02	1.85628e-11	1.84049e-11
8.04	1.85582e-11	1.8404e-11
8.06	1.85588e-11	1.8405e-11
8.08	1.85592e-11	1.84055e-11
8.1	1.85607e-11	1.84004e-11
8.12	1.85564e-11	1.8403e-11
8.14	1.85574e-11	1.8401e-11
8.16	1.85484e-11	1.83971e-11
8.18	1.85591e-11	1.83976e-11
8.2	1.85574e-11	1.84012e-11
8.22	1.85544e-11	1.83996e-11
8.24	1.85518e-11	1.83983e-11
8.26	1.85581e-11	1.8401e-11
8.28	1.85574e-11	1.84014e-11
8.3	1.85601e-11	1.84024e-11
8.32	1.8561e-11	1.84039e-11
8.34	1.85488e-11	1.84013e-11
8.36	1.85521e-11	1.84016e-11
8.38	1.85599e-11	1.84043e-11
8.4	1.85532e-11	1.84061e-11
8.42	1.85551e-11	1.84079e-11
8.44	1.85575e-11	1.84045e-11
8.46	1.85576e-11	1.8405e-11
8.48	1.85573e-11	1.84029e-11
8.5	1.85621e-11	1.83972e-11
8.52	1.85595e-11	1.84041e-11
8.54	1.85575e-11	1.83999e-11
8.56	1.85643e-11	1.84048e-11
8.58	1.85689e-11	1.84077e-11
8.6	1.85635e-11	1.84032e-11
8.62	1.85535e-11	1.84047e-11
8.64	1.85616e-11	1.84001e-11
8.66	1.8563e-11	1.84028e-11
8.68	1.85552e-11	1.84073e-11
8.7	1.85589e-11	1.8398e-11
8.72	1.85679e-11	1.84053e-11
8.74	1.85664e-11	1.84094e-11
8.76	1.85626e-11	1.84045e-11
8.78	1.85534e-11	1.84071e-11
8.8	1.85609e-11	1.84057e-11
8.82	1.85618e-11	1.8409e-11
8.84	1.85554e-11	1.8411e-11
8.86	1.85573e-11	1.84049e-11
8.88	1.85597e-11	1.84054e-11
8.9	1.85574e-11	1.83998e-11
8.92	1.85557e-11	1.84009e-11
8.94	1.85576e-11	1.84011e-11
8.96	1.85563e-11	1.84095e-11
8.98	1.8556e-11	1.8409e-11
9	1.85571e-11	1.8411e-11
9.02	1.85575e-11	1.84065e-11
9.04	1.85579e-11	1.84102e-11
9.06	1.85562e-11	1.84073e-11
9.08	1.85556e-11	1.84117e-11
9.1	1.85556e-11	1.84115e-11
9.12	1.85571e-11	1.84055e-11
9.14	1.85536e-11	1.84076e-11
9.16	1.85583e-11	1.841e-11
9.18	1.85616e-11	1.84032e-11
9.2	1.85617e-11	1.84039e-11
9.22	1.85576e-11	1.83999e-11
9.24	1.85608e-11	1.84057e-11
9.26	1.85642e-11	1.84013e-11
9.28	1.8562e-11	1.84082e-11
9.3	1.85611e-11	1.84034e-11
9.32	1.85504e-11	1.84042e-11
9.34	1.85605e-11	1.84038e-11
9.36	1.85571e-11	1.84007e-11
9.38	1.85533e-11	1.84052e-11
9.4	1.8557e-11	1.84066e-11
9.42	1.85569e-11	1.84033e-11
9.44	1.85572e-11	1.84107e-11
9.46	1.85564e-11	1.84074e-11
9.48	1.85653e-11	1.84036e-11
9.5	1.85627e-11	1.84037e-11
9.52	1.85614e-11	1.84049e-11
9.54	1.85613e-11	1.84086e-11
9.56	1.85582e-11	1.84033e-11
9.58	1.85658e-11	1.84024e-11
9.6	1.85592e-11	1.84018e-11
9.62	1.85615e-11	1.84035e-11
9.64	1.85652e-11	1.84028e-11
9.66	1.85584e-11	1.84064e-11
9.68	1.8564e-11	1.84029e-11
9.7	1.85625e-11	1.84073e-11
9.72	1.85574e-11	1.84087e-11
9.74	1.85617e-11	1.84061e-11
9.76	1.85648e-11	1.8405e-11
9.78	1.8563e-11	1.84079e-11
9.8	1.85536e-11	1.84075e-11
9.82	1.85586e-11	1.84077e-11
9.84	1.85586e-11	1.8407e-11
9.86	1.85603e-11	1.8404e-11
9.88	1.85594e-11	1.84088e-11
9.9	1.85625e-11	1.84094e-11
9.92	1.85566e-11	1.84115e-11
9.94	1.85541e-11	1.84078e-11
9.96	1.85552e-11	1.84029e-11
9.98	1.8559e-11	1.84112e-11
10	1.85602e-11	1.84088e-11
10.02	1.85574e-11	1.84092e-11
10.04	1.8563e-11	1.84081e-11
10.06	1.85541e-11	1.84062e-11
10.08	1.85602e-11	1.84033e-11
10.1	1.85668e-11	1.84039e-11
10.12	1.85594e-11	1.8409e-11
10.14	1.85669e-11	1.84042e-11
10.16	1.85571e-11	1.84043e-11
10.18	1.85661e-11	1.84113e-11
10.2	1.85616e-11	1.8407e-11
10.22	1.85607e-11	1.84085e-11
10.24	1.85658e-11	1.84105e-11
10.26	1.85614e-11	1.84075e-11
10.28	1.85662e-11	1.84054e-11
10.3	1.85635e-11	1.84121e-11
10.32	1.85615e-11	1.83994e-11
10.34	1.85634e-11	1.84046e-11
10.36	1.85612e-11	1.84063e-11
10.38	1.85589e-11	1.8411e-11
10.4	1.85619e-11	1.84074e-11
10.42	1.85609e-11	1.84075e-11
10.44	1.8556e-11	1.83996e-11
10.46	1.85572e-11	1.84139e-11
10.48	1.85716e-11	1.84024e-11
10.5	1.85636e-11	1.84043e-11
10.52	1.85624e-11	1.84125e-11
10.54	1.85647e-11	1.84124e-11
10.56	1.85604e-11	1.84113e-11
10.58	1.85627e-11	1.84097e-11
10.6	1.85695e-11	1.84069e-11
10.62	1.85638e-11	1.84155e-11
10.64	1.85588e-11	1.84168e-11
10.66	1.85624e-11	1.8409e-11
10.68	1.85636e-11	1.84104e-11
10.7	1.85652e-11	1.84098e-11
10.72	1.85668e-11	1.84103e-11
10.74	1.85636e-11	1.84021e-11
10.76	1.85647e-11	1.84125e-11
10.78	1.85629e-11	1.8408e-11
10.8	1.8563e-11	1.84089e-11
10.82	1.85669e-11	1.84075e-11
10.84	1.85673e-11	1.8411e-11
10.86	1.85629e-11	1.84132e-11
10.88	1.85659e-11	1.84084e-11
10.9	1.8565e-11	1.84082e-11
10.92	1.85655e-11	1.84064e-11
10.94	1.8566e-11	1.84072e-11
10.96	1.85618e-11	1.84111e-11
10.98	1.85688e-11	1.84093e-11
11	1.85651e-11	1.84037e-11
11.02	1.85682e-11	1.84105e-11
11.04	1.85663e-11	1.84066e-11
11.06	1.85757e-11	1.84117e-11
11.08	1.85656e-11	1.8408e-11
11.1	1.85512e-11	1.84126e-11
11.12	1.83182e-11	1.84097e-11
11.14	1.82754e-11	1.84098e-11
11.16	1.82766e-11	1.8406e-11
11.18	1.82661e-11	1.84117e-11
11.2	1.82627e-11	1.8413e-11
11.22	1.82704e-11	1.8408e-11
11.24	1.82889e-11	1.84074e-11
11.26	1.82961e-11	1.8408e-11
11.28	1.83007e-11	1.84051e-11
11.3	1.82926e-11	1.84118e-11
11.32	1.82871e-11	1.84097e-11
11.34	1.82878e-11	1.84094e-11
11.36	1.82858e-11	1.84038e-11
11.38	1.82779e-11	1.84086e-11
11.4	1.82787e-11	1.84035e-11
11.42	1.8279e-11	1.84093e-11
11.44	1.8273e-11	1.84034e-11
11.46	1.82682e-11	1.84026e-11
11.48	1.82711e-11	1.84105e-11
11.5	1.8267e-11	1.84066e-11
11.52	1.8267e-11	1.84108e-11
11.54	1.8266e-11	1.84057e-11
11.56	1.8266e-11	1.84133e-11
11.58	1.82672e-11	1.84102e-11
11.6	1.82623e-11	1.84198e-11
11.62	1.82609e-11	1.84121e-11
11.64	1.8265e-11	1.84063e-11
11.66	1.82588e-11	1.8411e-11
11.68	1.82573e-11	1.84095e-11
11.7	1.8259e-11	1.84077e-11
11.72	1.82615e-11	1.84087e-11
11.74	1.82502e-11	1.8408e-11
11.76	1.82543e-11	1.83995e-11
11.78	1.82558e-11	1.84092e-11
11.8	1.82508e-11	1.84088e-11
11.82	1.82513e-11	1.84121e-11
11.84	1.82552e-11	1.84062e-11
11.86	1.82408e-11	1.84089e-11
11.88	1.82505e-11	1.84056e-11
11.9	1.82458e-11	1.84109e-11
11.92	1.82521e-11	1.84087e-11
11.94	1.8251e-11	1.84087e-11
11.96	1.82515e-11	1.84084e-11
11.98	1.82354e-11	1.84122e-11
12	1.82483e-11	1.84095e-11
12.02	1.82477e-11	1.8405e-11
12.04	1.82445e-11	1.84128e-11
12.06	1.82442e-11	1.84132e-11
12.08	1.82444e-11	1.84066e-11
12.1	1.82481e-11	1.84134e-11
12.12	1.82402e-11	1.84029e-11
12.14	1.82494e-11	1.84086e-11
12.16	1.82482e-11	1.84057e-11
12.18	1.82455e-11	1.8414e-11
12.2	1.82452e-11	1.84104e-11
12.22	1.82398e-11	1.84076e-11
12.24	1.82489e-11	1.84149e-11
12.26	1.82505e-11	1.84048e-11
12.28	1.82466e-11	1.84096e-11
12.3	1.82409e-11	1.84093e-11
12.32	1.82405e-11	1.84139e-11
12.34	1.82397e-11	1.84124e-11
12.36	1.82409e-11	1.84053e-11
12.38	1.82448e-11	1.84121e-11
12.4	1.82391e-11	1.84148e-11
12.42	1.82352e-11	1.84114e-11
12.44	1.82447e-11	1.8412e-11
12.46	1.82391e-11	1.84131e-11
12.48	1.82429e-11	1.84144e-11
12.5	1.82437e-11	1.84081e-11
12.52	1.82402e-11	1.8411e-11
12.54	1.8241e-11	1.84161e-11
12.56	1.82448e-11	1.84052e-11
12.58	1.8238e-11	1.84092e-11
12.6	1.82371e-11	1.8416e-11
12.62	1.82376e-11	1.84138e-11
12.64	1.82368e-11	1.84122e-11
12.66	1.82445e-11	1.84113e-11
12.68	1.82346e-11	1.84122e-11
12.7	1.82325e-11	1.84099e-11
12.72	1.82353e-11	1.84113e-11
12.74	1.82393e-11	1.84112e-11
12.76	1.82423e-11	1.84106e-11
12.78	1.82378e-11	1.84109e-11
12.8	1.82342e-11	1.84145e-11
12.82	1.82322e-11	1.84088e-11
12.84	1.82352e-11	1.84245e-11
12.86	1.82329e-11	1.84167e-11
12.88	1.82397e-11	1.84165e-11
12.9	1.82389e-11	1.83971e-11
12.92	1.82313e-11	1.82824e-11
12.94	1.8238e-11	1.8219e-11
12.96	1.82381e-11	1.81876e-11
12.98	1.82332e-11	1.81827e-11
13	1.8234e-11	1.81753e-11
13.02	1.82355e-11	1.81881e-11
13.04	1.82379e-11	1.8197e-11
13.06	1.82313e-11	1.81949e-11
13.08	1.82414e-11	1.8197e-11
13.1	1.82374e-11	1.8191e-11
13.12	1.82377e-11	1.81886e-11
13.14	1.82311e-11	1.81838e-11
13.16	1.82355e-11	1.81781e-11
13.18	1.82309e-11	1.81817e-11
13.2	1.82334e-11	1.8182e-11
13.22	1.82349e-11	1.81742e-11
13.24	1.82335e-11	1.81744e-11
13.26	1.82323e-11	1.81785e-11
13.28	1.82407e-11	1.81725e-11
13.3	1.82374e-11	1.81682e-11
13.32	1.82366e-11	1.81651e-11
13.34	1.82426e-11	1.81712e-11
13.36	1.82327e-11	1.8171e-11
13.38	1.82295e-11	1.81674e-11
13.4	1.82364e-11	1.81608e-11
13.42	1.82353e-11	1.81696e-11
13.44	1.82413e-11	1.81658e-11
13.46	1.82387e-11	1.8163e-11
13.48	1.82341e-11	1.81609e-11
13.5	1.82305e-11	1.81617e-11
13.52	1.82299e-11	1.81633e-11
13.54	1.82406e-11	1.81558e-11
13.56	1.82366e-11	1.81599e-11
13.58	1.82332e-11	1.81588e-11
13.6	1.82371e-11	1.81586e-11
13.62	1.82345e-11	1.81644e-11
13.64	1.82337e-11	1.81577e-11
13.66	1.82402e-11	1.81593e-11
13.68	1.8229e-11	1.81588e-11
13.7	1.82332e-11	1.81566e-11
13.72	1.82346e-11	1.81556e-11
13.74	1.82293e-11	1.81514e-11
13.76	1.82338e-11	1.81546e-11
13.78	1.82305e-11	1.81582e-11
13.8	1.82363e-11	1.81513e-11
13.82	1.82335e-11	1.81513e-11
13.84	1.82343e-11	1.81531e-11
13.86	1.8235e-11	1.81561e-11
13.88	1.82288e-11	1.8153e-11
13.9	1.82353e-11	1.81599e-11
13.92	1.82306e-11	1.81527e-11
13.94	1.82335e-11	1.815e-11
13.96	1.82329e-11	1.81444e-11
13.98	1.82336e-11	1.81535e-11
14	1.82365e-11	1.81539e-11
14.02	1.82352e-11	1.81554e-11
14.04	1.82314e-11	1.81563e-11
14.06	1.82387e-11	1.81542e-11
14.08	1.82356e-11	1.81517e-11
14.1	1.82306e-11	1.81515e-11
14.12	1.82376e-11	1.81481e-11
14.14	1.82365e-11	1.81497e-11
14.16	1.82304e-11	1.81514e-11
14.18	1.82381e-11	1.81554e-11
14.2	1.82357e-11	1.81433e-11
14.22	1.82351e-11	1.81404e-11
14.24	1.82375e-11	1.81473e-11
14.26	1.82339e-11	1.81496e-11
14.28	1.82354e-11	1.81523e-11
14.3	1.82333e-11	1.81462e-11
14.32	1.82289e-11	1.81447e-11
14.34	1.82281e-11	1.81421e-11
14.36	1.82249e-11	1.81446e-11
14.38	1.82333e-11	1.81441e-11
14.4	1.82338e-11	1.8142e-11
14.42	1.82345e-11	1.81448e-11
14.44	1.82352e-11	1.81492e-11
14.46	1.82297e-11	1.81458e-11
14.48	1.82337e-11	1.81372e-11
14.5	1.82318e-11	1.81411e-11
14.52	1.82261e-11	1.81472e-11
14.54	1.82285e-11	1.81451e-11
14.56	1.82305e-11	1.8139e-11
14.58	1.82351e-11	1.81439e-11
14.6	1.82297e-11	1.8139e-11
14.62	1.823e-11	1.81445e-11
14.64	1.8231e-11	1.81423e-11
14.66	1.82301e-11	1.8135e-11
14.68	1.82351e-11	1.81418e-11
14.7	1.82249e-11	1.81428e-11
14.72	1.82315e-11	1.81402e-11
14.74	1.82304e-11	1.81435e-11
14.76	1.82349e-11	1.81425e-11
14.78	1.8236e-11	1.81405e-11
14.8	1.8237e-11	1.81414e-11
14.82	1.82363e-11	1.81427e-11
14.84	1.82297e-11	1.81391e-11
14.86	1.8235e-11	1.81435e-11
14.88	1.82342e-11	1.81377e-11
14.9	1.823e-11	1.81354e-11
14.92	1.82378e-11	1.81397e-11
14.94	1.82423e-11	1.81395e-11
14.96	1.82377e-11	1.81421e-11
14.98	1.82356e-11	1.81412e-11
15	1.8226e-11	1.81446e-11
15.02	1.82348e-11	1.81458e-11
15.04	1.82317e-11	1.81407e-11
15.06	1.82312e-11	1.81458e-11
15.08	1.82334e-11	1.8143e-11
15.1	1.82319e-11	1.8141e-11
15.12	1.82318e-11	1.81381e-11
15.14	1.82346e-11	1.81371e-11
15.16	1.82321e-11	1.81315e-11
15.18	1.82314e-11	1.81381e-11
15.2	1.82383e-11	1.81384e-11
15.22	1.82381e-11	1.81351e-11
15.24	1.8228e-11	1.81383e-11
15.26	1.82291e-11	1.81432e-11
15.28	1.82319e-11	1.81435e-11
15.3	1.82387e-11	1.81357e-11
15.32	1.82323e-11	1.81387e-11
15.34	1.8232e-11	1.81452e-11
15.36	1.82331e-11	1.81393e-11
15.38	1.82399e-11	1.81328e-11
15.4	1.82384e-11	1.81299e-11
15.42	1.82338e-11	1.81372e-11
15.44	1.82293e-11	1.81392e-11
15.46	1.82316e-11	1.81377e-11
15.48	1.82339e-11	1.81384e-11
15.5	1.82376e-11	1.81367e-11
15.52	1.82352e-11	1.81408e-11
15.54	1.824e-11	1.813e-11
15.56	1.82282e-11	1.8141e-11
15.58	1.82351e-11	1.81359e-11
15.6	1.82314e-11	1.81437e-11
15.62	1.82342e-11	1.8136e-11
15.64	1.82337e-11	1.8137e-11
15.66	1.82356e-11	1.81376e-11
15.68	1.82407e-11	1.81324e-11
15.7	1.82366e-11	1.81343e-11
15.72	1.82324e-11	1.81369e-11
15.74	1.82376e-11	1.81354e-11
15.76	1.8237e-11	1.81325e-11
15.78	1.8234e-11	1.81327e-11
15.8	1.82414e-11	1.81375e-11
15.82	1.82346e-11	1.81353e-11
15.84	1.82383e-11	1.81304e-11
15.86	1.82324e-11	1.81341e-11
15.88	1.82335e-11	1.81365e-11
15.9	1.82331e-11	1.81389e-11
15.92	1.82349e-11	1.81325e-11
15.94	1.82352e-11	1.81345e-11
15.96	1.82389e-11	1.81296e-11
15.98	1.82322e-11	1.81274e-11
16	1.82264e-11	1.81344e-11
16.02	1.82375e-11	1.81444e-11
16.04	1.82377e-11	1.81332e-11
16.06	1.82391e-11	1.81345e-11
16.08	1.82371e-11	1.81371e-11
16.1	1.82319e-11	1.81286e-11
16.12	1.82401e-11	1.81367e-11
16.14	1.82346e-11	1.81329e-11
16.16	1.8233e-11	1.81339e-11
16.18	1.82342e-11	1.81319e-11
16.2	1.82379e-11	1.81303e-11
16.22	1.82338e-11	1.8139e-11
16.24	1.82388e-11	1.81404e-11
16.26	1.82354e-11	1.81326e-11
16.28	1.82374e-11	1.81409e-11
16.3	1.82374e-11	1.81352e-11
16.32	1.82408e-11	1.81367e-11
16.34	1.82359e-11	1.81344e-11
16.36	1.82302e-11	1.81323e-11
16.38	1.824e-11	1.81388e-11
16.4	1.82403e-11	1.81402e-11
16.42	1.82443e-11	1.81374e-11
16.44	1.82332e-11	1.81314e-11
16.46	1.82369e-11	1.81304e-11
16.48	1.82347e-11	1.81315e-11
16.5	1.8237e-11	1.81341e-11
16.52	1.82338e-11	1.81355e-11
16.54	1.82411e-11	1.81324e-11
16.56	1.82341e-11	1.81303e-11
16.58	1.82331e-11	1.81343e-11
16.6	1.8239e-11	1.81287e-11
16.62	1.82399e-11	1.81379e-11
16.64	1.82399e-11	1.81309e-11
16.66	1.82373e-11	1.81305e-11
16.68	1.82365e-11	1.81361e-11
16.7	1.82336e-11	1.81386e-11
16.72	1.82414e-11	1.81267e-11
16.74	1.82394e-11	1.81324e-11
16.76	1.82394e-11	1.81301e-11
16.78	1.82383e-11	1.81374e-11
16.8	1.82425e-11	1.81341e-11
16.82	1.8238e-11	1.81319e-11
16.84	1.82433e-11	1.81335e-11
16.86	1.8236e-11	1.81386e-11
16.88	1.82341e-11	1.81324e-11
16.9	1.82413e-11	1.81361e-11
16.92	1.82393e-11	1.81325e-11
16.94	1.82406e-11	1.8135e-11
16.96	1.82379e-11	1.81291e-11
16.98	1.82419e-11	1.81332e-11
17	1.82375e-11	1.81349e-11
17.02	1.82417e-11	1.81336e-11
17.04	1.82348e-11	1.8135e-11
17.06	1.82376e-11	1.8137e-11
17.08	1.82434e-11	1.81348e-11
17.1	1.82411e-11	1.81308e-11
17.12	1.8243e-11	1.81395e-11
17.14	1.82338e-11	1.81385e-11
17.16	1.82378e-11	1.8131e-11
17.18	1.82427e-11	1.81341e-11
17.2	1.82415e-11	1.81397e-11
17.22	1.8239e-11	1.81279e-11
17.24	1.82459e-11	1.81299e-11
17.26	1.82412e-11	1.81293e-11
17.28	1.82395e-11	1.81355e-11
17.3	1.82378e-11	1.81323e-11
17.32	1.82385e-11	1.81353e-11
17.34	1.82392e-11	1.81317e-11
17.36	1.82422e-11	1.81283e-11
17.38	1.82422e-11	1.81425e-11
17.4	1.82456e-11	1.81361e-11
17.42	1.8243e-11	1.81355e-11
17.44	1.82412e-11	1.81285e-11
17.46	1.82463e-11	1.81331e-11
17.48	1.8242e-11	1.81392e-11
17.5	1.8242e-11	1.81366e-11
17.52	1.82482e-11	1.81316e-11
17.54	1.82424e-11	1.8133e-11
17.56	1.82454e-11	1.81287e-11
17.58	1.82518e-11	1.81278e-11
17.6	1.82453e-11	1.81343e-11
17.62	1.82444e-11	1.81294e-11
17.64	1.82486e-11	1.81297e-11
17.66	1.82406e-11	1.81363e-11
17.68	1.82398e-11	1.81306e-11
17.7	1.82422e-11	1.81246e-11
17.72	1.82466e-11	1.8136e-11
17.74	1.82461e-11	1.81302e-11
17.76	1.82393e-11	1.81332e-11
17.78	1.82462e-11	1.81279e-11
17.8	1.82506e-11	1.81295e-11
17.82	1.82493e-11	1.8124e-11
17.84	1.82399e-11	1.8137e-11
17.86	1.82406e-11	1.81307e-11
17.88	1.82426e-11	1.8127e-11
17.9	1.82464e-11	1.8131e-11
17.92	1.82404e-11	1.81321e-11
17.94	1.82446e-11	1.81294e-11
17.96	1.82402e-11	1.81322e-11
17.98	1.8245e-11	1.813e-11
18	1.82451e-11	1.81385e-11
18.02	1.82421e-11	1.81321e-11
18.04	1.82452e-11	1.81348e-11
18.06	1.82492e-11	1.81321e-11
18.08	1.82512e-11	1.81297e-11
18.1	1.82462e-11	1.81325e-11
18.12	1.82547e-11	1.81328e-11
18.14	1.82495e-11	1.81313e-11
18.16	1.82528e-11	1.81345e-11
18.18	1.82458e-11	1.81313e-11
18.2	1.82492e-11	1.81354e-11
18.22	1.82529e-11	1.81317e-11
18.24	1.82531e-11	1.81331e-11
18.26	1.82454e-11	1.81324e-11
18.28	1.82464e-11	1.81317e-11
18.3	1.82543e-11	1.81343e-11
18.32	1.82479e-11	1.81314e-11
18.34	1.82485e-11	1.81353e-11
18.36	1.82483e-11	1.81311e-11
18.38	1.82479e-11	1.81281e-11
18.4	1.82438e-11	1.81287e-11
18.42	1.82487e-11	1.8134e-11
18.44	1.82499e-11	1.81262e-11
18.46	1.8247e-11	1.81316e-11
18.48	1.82521e-11	1.81339e-11
18.5	1.8252e-11	1.81355e-11
18.52	1.82523e-11	1.81339e-11
18.54	1.82512e-11	1.81308e-11
18.56	1.82565e-11	1.81327e-11
18.58	1.82594e-11	1.81243e-11
18.6	1.82569e-11	1.81377e-11
18.62	1.8259e-11	1.8132e-11
18.64	1.82589e-11	1.81225e-11
18.66	1.82574e-11	1.81306e-11
18.68	1.82548e-11	1.81317e-11
18.7	1.82558e-11	1.81318e-11
18.72	1.82527e-11	1.81348e-11
18.74	1.82493e-11	1.81282e-11
18.76	1.82538e-11	1.81329e-11
18.78	1.82596e-11	1.81345e-11
18.8	1.82553e-11	1.81295e-11
18.82	1.82489e-11	1.81318e-11
18.84	1.82621e-11	1.81329e-11
18.86	1.82571e-11	1.81364e-11
18.88	1.82567e-11	1.81316e-11
18.9	1.82621e-11	1.81278e-11
18.92	1.82642e-11	1.81262e-11
18.94	1.82601e-11	1.81267e-11
18.96	1.82581e-11	1.81319e-11
18.98	1.82643e-11	1.81312e-11
19	1.82675e-11	1.8132e-11
19.02	1.82598e-11	1.81332e-11
19.04	1.82659e-11	1.81388e-11
19.06	1.82621e-11	1.81362e-11
19.08	1.82621e-11	1.81338e-11
19.1	1.82618e-11	1.81461e-11
19.12	1.82662e-11	1.81339e-11
19.14	1.82648e-11	1.81351e-11
19.16	1.82641e-11	1.81348e-11
19.18	1.82652e-11	1.81305e-11
19.2	1.82668e-11	1.81366e-11
19.22	1.82602e-11	1.81339e-11
19.24	1.82692e-11	1.81341e-11
19.26	1.82613e-11	1.81442e-11
19.28	1.82757e-11	1.81317e-11
19.3	1.82672e-11	1.81363e-11
19.32	1.82695e-11	1.81355e-11
19.34	1.82662e-11	1.81331e-11
19.36	1.82708e-11	1.81356e-11
19.38	1.82722e-11	1.8134e-11
19.4	1.82721e-11	1.81295e-11
19.42	1.82733e-11	1.81369e-11
19.44	1.8267e-11	1.8138e-11
19.46	1.82727e-11	1.81331e-11
19.48	1.82709e-11	1.81354e-11
19.5	1.82693e-11	1.81372e-11
19.52	1.82728e-11	1.81336e-11
19.54	1.82709e-11	1.8133e-11
19.56	1.82726e-11	1.81374e-11
19.58	1.82735e-11	1.81366e-11
19.6	1.82737e-11	1.8133e-11
19.62	1.82738e-11	1.81299e-11
19.64	1.82727e-11	1.814e-11
19.66	1.82715e-11	1.81363e-11
19.68	1.82742e-11	1.81413e-11
19.7	1.82822e-11	1.81352e-11
19.72	1.82773e-11	1.81381e-11
19.74	1.82729e-11	1.81319e-11
19.76	1.82692e-11	1.81351e-11
19.78	1.82727e-11	1.81377e-11
19.8	1.82757e-11	1.81451e-11
19.82	1.82717e-11	1.81325e-11
19.84	1.82746e-11	1.81378e-11
19.86	1.82701e-11	1.81378e-11
19.88	1.82808e-11	1.8143e-11
19.9	1.82701e-11	1.81421e-11
19.92	1.82804e-11	1.81418e-11
19.94	1.82768e-11	1.81484e-11
19.96	1.8276e-11	1.81445e-11
19.98	1.82791e-11	1.81368e-11
20	1.82795e-11	1.81382e-11
20.02	1.82751e-11	1.81411e-11
20.04	1.82879e-11	1.81333e-11
20.06	1.82766e-11	1.81416e-11
20.08	1.8284e-11	1.81386e-11
20.1	1.82798e-11	1.81365e-11
20.12	1.82845e-11	1.81345e-11
20.14	1.82832e-11	1.81433e-11
20.16	1.82882e-11	1.81383e-11
20.18	1.82827e-11	1.81392e-11
20.2	1.82782e-11	1.81418e-11
20.22	1.8282e-11	1.81485e-11
20.24	1.82856e-11	1.81441e-11
20.26	1.82828e-11	1.81407e-11
20.28	1.82831e-11	1.81455e-11
20.3	1.82867e-11	1.81463e-11
20.32	1.82832e-11	1.81468e-11
20.34	1.82879e-11	1.81461e-11
20.36	1.82847e-11	1.81479e-11
20.38	1.82822e-11	1.81482e-11
20.4	1.8282e-11	1.81485e-11
20.42	1.82847e-11	1.81432e-11
20.44	1.82861e-11	1.81431e-11
20.46	1.82853e-11	1.81433e-11
20.48	1.8288e-11	1.81449e-11
20.5	1.82867e-11	1.81448e-11
20.52	1.82871e-11	1.81449e-11
20.54	1.8296e-11	1.81517e-11
20.56	1.82896e-11	1.8151e-11
20.58	1.82865e-11	1.81453e-11
20.6	1.82822e-11	1.81503e-11
20.62	1.82838e-11	1.8148e-11
20.64	1.82854e-11	1.81532e-11
20.66	1.82829e-11	1.81507e-11
20.68	1.82829e-11	1.815e-11
20.7	1.82914e-11	1.81534e-11
20.72	1.82875e-11	1.81485e-11
20.74	1.82902e-11	1.8155e-11
20.76	1.82907e-11	1.8149e-11
20.78	1.82952e-11	1.81564e-11
20.8	1.82899e-11	1.81555e-11
20.82	1.82879e-11	1.81555e-11
20.84	1.82873e-11	1.81512e-11
20.86	1.8291e-11	1.81538e-11
20.88	1.82891e-11	1.81583e-11
20.9	1.82844e-11	1.8157e-11
20.92	1.82865e-11	1.81563e-11
20.94	1.82857e-11	1.81538e-11
20.96	1.82914e-11	1.81554e-11
20.98	1.82887e-11	1.81525e-11
21	1.82884e-11	1.81592e-11
21.02	1.8296e-11	1.81571e-11
21.04	1.82886e-11	1.81544e-11
21.06	1.83016e-11	1.81512e-11
21.08	1.82966e-11	1.81614e-11
21.1	1.829e-11	1.81622e-11
21.12	1.82884e-11	1.81651e-11
21.14	1.82948e-11	1.81642e-11
21.16	1.83104e-11	1.81588e-11
21.18	1.83247e-11	1.81591e-11
21.2	1.83398e-11	1.81575e-11
21.22	1.83478e-11	1.8158e-11
21.24	1.83605e-11	1.81544e-11
21.26	1.83633e-11	1.81557e-11
21.28	1.8377e-11	1.81593e-11
21.3	1.83778e-11	1.81602e-11
21.32	1.83748e-11	1.81595e-11
21.34	1.83706e-11	1.81635e-11
21.36	1.83755e-11	1.81592e-11
21.38	1.83666e-11	1.81596e-11
21.4	1.83635e-11	1.81611e-11
21.42	1.83656e-11	1.81628e-11
21.44	1.83646e-11	1.81623e-11
21.46	1.83689e-11	1.81606e-11
21.48	1.83697e-11	1.81603e-11
21.5	1.83628e-11	1.81692e-11
21.52	1.83603e-11	1.81608e-11
21.54	1.83664e-11	1.81638e-11
21.56	1.83656e-11	1.81653e-11
21.58	1.83683e-11	1.81613e-11
21.6	1.83581e-11	1.81639e-11
21.62	1.83634e-11	1.81652e-11
21.64	1.83603e-11	1.81673e-11
21.66	1.83517e-11	1.81669e-11
21.68	1.83524e-11	1.81592e-11
21.7	1.83582e-11	1.81674e-11
21.72	1.83491e-11	1.81651e-11
21.74	1.83508e-11	1.8166e-11
21.76	1.83461e-11	1.81594e-11
21.78	1.8348e-11	1.81663e-11
21.8	1.83456e-11	1.81678e-11
21.82	1.83466e-11	1.81687e-11
21.84	1.83446e-11	1.81701e-11
21.86	1.83391e-11	1.81662e-11
21.88	1.83447e-11	1.81687e-11
21.9	1.8341e-11	1.81636e-11
21.92	1.83464e-11	1.81673e-11
21.94	1.83377e-11	1.8169e-11
21.96	1.83446e-11	1.81702e-11
21.98	1.83434e-11	1.81739e-11
22	1.83422e-11	1.81662e-11
22.02	1.83385e-11	1.81691e-11
22.04	1.8335e-11	1.81722e-11
22.06	1.83373e-11	1.817e-11
22.08	1.83395e-11	1.81693e-11
22.1	1.83368e-11	1.8177e-11
22.12	1.83361e-11	1.81644e-11
22.14	1.83363e-11	1.81691e-11
22.16	1.83322e-11	1.81655e-11
22.18	1.83369e-11	1.81708e-11
22.2	1.83329e-11	1.81745e-11
22.22	1.83346e-11	1.81669e-11
22.24	1.8334e-11	1.81744e-11
22.26	1.83277e-11	1.81777e-11
22.28	1.83392e-11	1.81727e-11
22.3	1.83273e-11	1.81721e-11
22.32	1.83312e-11	1.81703e-11
22.34	1.83343e-11	1.817e-11
22.36	1.83242e-11	1.81731e-11
22.38	1.8335e-11	1.81736e-11
22.4	1.83289e-11	1.81705e-11
22.42	1.83322e-11	1.81757e-11
22.44	1.83345e-11	1.81758e-11
22.46	1.83253e-11	1.81704e-11
22.48	1.83304e-11	1.81783e-11
22.5	1.8334e-11	1.81714e-11
22.52	1.8331e-11	1.81729e-11
22.54	1.83324e-11	1.81732e-11
22.56	1.83302e-11	1.81785e-11
22.58	1.83234e-11	1.81724e-11
22.6	1.83232e-11	1.81777e-11
22.62	1.833e-11	1.81734e-11
22.64	1.83344e-11	1.81691e-11
22.66	1.83331e-11	1.81755e-11
22.68	1.83329e-11	1.81774e-11
22.7	1.83345e-11	1.81773e-11
22.72	1.83309e-11	1.81721e-11
22.74	1.8331e-11	1.81769e-11
22.76	1.83313e-11	1.81773e-11
22.78	1.83286e-11	1.81775e-11
22.8	1.83273e-11	1.81781e-11
22.82	1.8328e-11	1.81802e-11
22.84	1.83296e-11	1.81763e-11
22.86	1.83308e-11	1.81789e-11
22.88	1.83238e-11	1.81793e-11
22.9	1.83294e-11	1.81775e-11
22.92	1.83232e-11	1.81741e-11
22.94	1.8331e-11	1.81677e-11
22.96	1.83311e-11	1.81714e-11
22.98	1.83353e-11	1.81686e-11
23	1.83324e-11	1.81648e-11
23.02	1.83268e-11	1.81707e-11
23.04	1.83303e-11	1.81717e-11
23.06	1.83318e-11	1.81676e-11
23.08	1.83317e-11	1.81708e-11
23.1	1.83289e-11	1.81656e-11
23.12	1.83377e-11	1.81676e-11
23.14	1.83356e-11	1.81673e-11
23.16	1.83313e-11	1.81635e-11
23.18	1.83376e-11	1.81614e-11
23.2	1.83345e-11	1.81637e-11
23.22	1.83338e-11	1.81655e-11
23.24	1.83325e-11	1.81704e-11
23.26	1.83293e-11	1.81614e-11
23.28	1.833e-11	1.81614e-11
23.3	1.83312e-11	1.81628e-11
23.32	1.83394e-11	1.81587e-11
23.34	1.83342e-11	1.81636e-11
23.36	1.83359e-11	1.8165e-11
23.38	1.83371e-11	1.81612e-11
23.4	1.8338e-11	1.81619e-11
23.42	1.83363e-11	1.81601e-11
23.44	1.83345e-11	1.81589e-11
23.46	1.8335e-11	1.81632e-11
23.48	1.83343e-11	1.81637e-11
23.5	1.83394e-11	1.81619e-11
23.52	1.83361e-11	1.81653e-11
23.54	1.83344e-11	1.81598e-11
23.56	1.83389e-11	1.81642e-11
23.58	1.83361e-11	1.81578e-11
23.6	1.83405e-11	1.81575e-11
23.62	1.83355e-11	1.81641e-11
23.64	1.83426e-11	1.81611e-11
23.66	1.83426e-11	1.81666e-11
23.68	1.83396e-11	1.81645e-11
23.7	1.83325e-11	1.81544e-11
23.72	1.83374e-11	1.8165e-11
23.74	1.83403e-11	1.8164e-11
23.76	1.83365e-11	1.81638e-11
23.78	1.83316e-11	1.81651e-11
23.8	1.83428e-11	1.8169e-11
23.82	1.83481e-11	1.81659e-11
23.84	1.83484e-11	1.81588e-11
23.86	1.8342e-11	1.81611e-11
23.88	1.8342e-11	1.81622e-11
23.9	1.83413e-11	1.81571e-11
23.92	1.83389e-11	1.81691e-11
23.94	1.83405e-11	1.81621e-11
23.96	1.83374e-11	1.8157e-11
23.98	1.83394e-11	1.81622e-11
24	1.83453e-11	1.81585e-11
24.02	1.83469e-11	1.81687e-11
24.04	1.83443e-11	1.81595e-11
24.06	1.83378e-11	1.81644e-11
24.08	1.83423e-11	1.81669e-11
24.1	1.83445e-11	1.81611e-11
24.12	1.83401e-11	1.81607e-11
24.14	1.83437e-11	1.8164e-11
24.16	1.83464e-11	1.81653e-11
24.18	1.8344e-11	1.81637e-11
24.2	1.8344e-11	1.81626e-11
24.22	1.83426e-11	1.81631e-11
24.24	1.83478e-11	1.81629e-11
24.26	1.83473e-11	1.81629e-11
24.28	1.83504e-11	1.81689e-11
24.3	1.83451e-11	1.81682e-11
24.32	1.8344e-11	1.81626e-11
24.34	1.83467e-11	1.81644e-11
24.36	1.83494e-11	1.81654e-11
24.38	1.83441e-11	1.81678e-11
24.4	1.83505e-11	1.81678e-11
24.42	1.83431e-11	1.81687e-11
24.44	1.83517e-11	1.81621e-11
24.46	1.83486e-11	1.81653e-11
24.48	1.83529e-11	1.81703e-11
24.5	1.83511e-11	1.81698e-11
24.52	1.8346e-11	1.81599e-11
24.54	1.83473e-11	1.81616e-11
24.56	1.83496e-11	1.81617e-11
24.58	1.83539e-11	1.81679e-11
24.6	1.83503e-11	1.81668e-11
24.62	1.83573e-11	1.81696e-11
24.64	1.83507e-11	1.81679e-11
24.66	1.835e-11	1.81647e-11
24.68	1.83528e-11	1.81687e-11
24.7	1.83494e-11	1.81655e-11
24.72	1.83551e-11	1.81653e-11
24.74	1.83515e-11	1.81728e-11
24.76	1.83549e-11	1.81636e-11
24.78	1.83511e-11	1.81603e-11
24.8	1.83526e-11	1.81686e-11
24.82	1.83555e-11	1.8168e-11
24.84	1.83516e-11	1.81675e-11
24.86	1.83576e-11	1.81681e-11
24.88	1.83598e-11	1.81727e-11
24.9	1.83533e-11	1.81664e-11
24.92	1.83597e-11	1.81717e-11
24.94	1.8361e-11	1.81646e-11
24.96	1.83562e-11	1.81701e-11
24.98	1.83542e-11	1.81668e-11
25	1.83544e-11	1.81688e-11
25.02	1.83605e-11	1.81732e-11
25.04	1.83556e-11	1.81692e-11
25.06	1.83604e-11	1.81725e-11
25.08	1.83588e-11	1.81774e-11
25.1	1.83579e-11	1.81723e-11
25.12	1.83567e-11	1.81737e-11
25.14	1.83597e-11	1.81726e-11
25.16	1.83638e-11	1.81742e-11
25.18	1.8366e-11	1.81748e-11
25.2	1.83577e-11	1.81712e-11
25.22	1.83554e-11	1.81754e-11
25.24	1.83619e-11	1.81663e-11
25.26	1.83582e-11	1.81709e-11
25.28	1.83636e-11	1.81732e-11
25.3	1.8364e-11	1.81751e-11
25.32	1.83561e-11	1.81728e-11
25.34	1.83608e-11	1.81657e-11
25.36	1.83591e-11	1.81676e-11
25.38	1.83595e-11	1.8174e-11
25.4	1.83634e-11	1.81749e-11
25.42	1.83591e-11	1.81745e-11
25.44	1.83654e-11	1.81646e-11
25.46	1.83677e-11	1.81669e-11
25.48	1.83631e-11	1.81678e-11
25.5	1.83632e-11	1.81803e-11
25.52	1.83668e-11	1.81797e-11
25.54	1.83613e-11	1.81743e-11
25.56	1.83583e-11	1.81726e-11
25.58	1.83632e-11	1.81761e-11
25.6	1.83588e-11	1.81733e-11
25.62	1.8366e-11	1.81761e-11
25.64	1.83588e-11	1.81747e-11
25.66	1.83619e-11	1.81719e-11
25.68	1.83642e-11	1.81801e-11
25.7	1.83623e-11	1.81749e-11
25.72	1.83642e-11	1.81757e-11
25.74	1.83595e-11	1.81808e-11
25.76	1.83707e-11	1.81718e-11
25.78	1.83651e-11	1.8174e-11
25.8	1.83659e-11	1.81809e-11
25.82	1.83632e-11	1.81761e-11
25.84	1.8373e-11	1.81787e-11
25.86	1.83754e-11	1.81768e-11
25.88	1.83674e-11	1.81793e-11
25.9	1.83686e-11	1.81754e-11
25.92	1.83666e-11	1.81807e-11
25.94	1.83742e-11	1.81791e-11
25.96	1.83697e-11	1.81844e-11
25.98	1.83706e-11	1.81812e-11
26	1.83675e-11	1.81835e-11
26.02	1.83745e-11	1.81755e-11
26.04	1.83717e-11	1.81783e-11
26.06	1.83694e-11	1.8179e-11
26.08	1.83751e-11	1.81848e-11
26.1	1.83679e-11	1.81847e-11
26.12	1.83646e-11	1.81761e-11
26.14	1.8377e-11	1.81744e-11
26.16	1.83706e-11	1.81875e-11
26.18	1.83705e-11	1.81945e-11
26.2	1.83692e-11	1.81789e-11
26.22	1.83718e-11	1.8179e-11
26.24	1.83756e-11	1.81834e-11
26.26	1.83711e-11	1.81887e-11
26.28	1.83694e-11	1.81847e-11
26.3	1.83773e-11	1.81821e-11
26.32	1.83784e-11	1.81811e-11
26.34	1.83806e-11	1.81794e-11
26.36	1.83745e-11	1.81887e-11
26.38	1.83716e-11	1.81829e-11
26.4	1.8377e-11	1.81881e-11
26.42	1.83822e-11	1.81845e-11
26.44	1.83757e-11	1.81848e-11
26.46	1.83761e-11	1.81885e-11
26.48	1.83797e-11	1.81868e-11
26.5	1.8372e-11	1.81847e-11
26.52	1.83812e-11	1.81826e-11
26.54	1.83794e-11	1.81881e-11
26.56	1.83827e-11	1.81871e-11
26.58	1.83826e-11	1.81825e-11
26.6	1.83798e-11	1.81899e-11
26.62	1.83794e-11	1.81903e-11
26.64	1.83746e-11	1.81857e-11
26.66	1.83842e-11	1.8195e-11
26.68	1.83851e-11	1.81909e-11
26.7	1.83803e-11	1.81898e-11
26.72	1.83827e-11	1.8189e-11
26.74	1.83829e-11	1.81885e-11
26.76	1.83856e-11	1.81869e-11
26.78	1.8384e-11	1.81883e-11
26.8	1.83812e-11	1.81882e-11
26.82	1.8382e-11	1.81914e-11
26.84	1.83855e-11	1.81916e-11
26.86	1.8386e-11	1.81924e-11
26.88	1.83869e-11	1.81955e-11
26.9	1.8384e-11	1.81902e-11
26.92	1.83852e-11	1.81884e-11
26.94	1.8387e-11	1.81897e-11
26.96	1.83851e-11	1.8195e-11
26.98	1.83869e-11	1.81964e-11
27	1.83767e-11	1.819e-11
27.02	1.83871e-11	1.81946e-11
27.04	1.83793e-11	1.8191e-11
27.06	1.83853e-11	1.81995e-11
27.08	1.83872e-11	1.81958e-11
27.1	1.83838e-11	1.81974e-11
27.12	1.83808e-11	1.81949e-11
27.14	1.83809e-11	1.81918e-11
27.16	1.83861e-11	1.81929e-11
27.18	1.83823e-11	1.81921e-11
27.2	1.83823e-11	1.81928e-11
27.22	1.83955e-11	1.81934e-11
27.24	1.83868e-11	1.81915e-11
27.26	1.83839e-11	1.81921e-11
27.28	1.83877e-11	1.81954e-11
27.3	1.83796e-11	1.81955e-11
27.32	1.83882e-11	1.81965e-11
27.34	1.83875e-11	1.81973e-11
27.36	1.83895e-11	1.8191e-11
27.38	1.83966e-11	1.82043e-11
27.4	1.83904e-11	1.82003e-11
27.42	1.83962e-11	1.81948e-11
27.44	1.83908e-11	1.81983e-11
27.46	1.83883e-11	1.81924e-11
27.48	1.83924e-11	1.81936e-11
27.5	1.83941e-11	1.82014e-11
27.52	1.83859e-11	1.81991e-11
27.54	1.83911e-11	1.81958e-11
27.56	1.83909e-11	1.81963e-11
27.58	1.83934e-11	1.81958e-11
27.6	1.83879e-11	1.81995e-11
27.62	1.83939e-11	1.82077e-11
27.64	1.83886e-11	1.82024e-11
27.66	1.83978e-11	1.82006e-11
27.68	1.83884e-11	1.8198e-11
27.7	1.83854e-11	1.81963e-11
27.72	1.83921e-11	1.8198e-11
27.74	1.83928e-11	1.82053e-11
27.76	1.83893e-11	1.82016e-11
27.78	1.83908e-11	1.81953e-11
27.8	1.83956e-11	1.81994e-11
27.82	1.83899e-11	1.82054e-11
27.84	1.83887e-11	1.81982e-11
27.86	1.83945e-11	1.82e-11
27.88	1.83906e-11	1.81997e-11
27.9	1.84002e-11	1.82046e-11
27.92	1.83898e-11	1.81985e-11
27.94	1.8393e-11	1.82042e-11
27.96	1.83949e-11	1.82063e-11
27.98	1.83967e-11	1.82023e-11
28	1.8394e-11	1.82069e-11
28.02	1.84008e-11	1.82012e-11
28.04	1.83985e-11	1.81982e-11
28.06	1.84016e-11	1.82058e-11
28.08	1.83956e-11	1.81996e-11
28.1	1.83976e-11	1.81927e-11
28.12	1.83925e-11	1.8203e-11
28.14	1.83984e-11	1.81979e-11
28.16	1.83961e-11	1.81983e-11
28.18	1.83984e-11	1.82005e-11
28.2	1.83981e-11	1.82072e-11
28.22	1.83974e-11	1.8205e-11
28.24	1.84022e-11	1.82031e-11
28.26	1.84006e-11	1.82082e-11
28.28	1.8406e-11	1.82087e-11
28.3	1.84042e-11	1.82029e-11
28.32	1.83956e-11	1.82085e-11
28.34	1.83984e-11	1.82021e-11
28.36	1.8404e-11	1.82043e-11
28.38	1.83963e-11	1.82064e-11
28.4	1.84014e-11	1.82088e-11
28.42	1.84053e-11	1.82059e-11
28.44	1.84047e-11	1.82045e-11
28.46	1.84073e-11	1.82085e-11
28.48	1.84042e-11	1.82136e-11
28.5	1.84016e-11	1.82065e-11
28.52	1.83959e-11	1.82064e-11
28.54	1.84019e-11	1.8207e-11
28.56	1.84086e-11	1.82086e-11
28.58	1.84081e-11	1.82093e-11
28.6	1.84031e-11	1.82104e-11
28.62	1.8405e-11	1.82063e-11
28.64	1.83995e-11	1.82092e-11
28.66	1.84019e-11	1.82112e-11
28.68	1.84072e-11	1.82038e-11
28.7	1.84026e-11	1.82097e-11
28.72	1.84065e-11	1.82137e-11
28.74	1.84046e-11	1.82079e-11
28.76	1.84058e-11	1.82129e-11
28.78	1.84053e-11	1.82035e-11
28.8	1.84071e-11	1.82101e-11
28.82	1.84138e-11	1.8211e-11
28.84	1.8411e-11	1.82135e-11
28.86	1.84007e-11	1.82101e-11
28.88	1.84097e-11	1.82108e-11
28.9	1.84052e-11	1.82079e-11
28.92	1.84044e-11	1.82132e-11
28.94	1.84052e-11	1.82112e-11
28.96	1.84123e-11	1.82148e-11
28.98	1.84123e-11	1.82149e-11
29	1.84065e-11	1.8211e-11
29.02	1.84121e-11	1.82102e-11
29.04	1.84165e-11	1.82087e-11
29.06	1.84123e-11	1.82139e-11
29.08	1.84132e-11	1.82124e-11
29.1	1.84114e-11	1.82149e-11
29.12	1.84041e-11	1.82122e-11
29.14	1.84059e-11	1.82113e-11
29.16	1.84084e-11	1.82084e-11
29.18	1.84105e-11	1.82164e-11
29.2	1.84131e-11	1.82151e-11
29.22	1.84151e-11	1.82099e-11
29.24	1.84086e-11	1.8215e-11
29.26	1.84112e-11	1.82125e-11
29.28	1.84126e-11	1.8213e-11
29.3	1.84095e-11	1.82114e-11
29.32	1.84155e-11	1.82104e-11
29.34	1.84156e-11	1.82144e-11
29.36	1.84105e-11	1.82145e-11
29.38	1.84211e-11	1.82137e-11
29.4	1.84133e-11	1.82193e-11
29.42	1.84101e-11	1.82162e-11
29.44	1.8407e-11	1.82171e-11
29.46	1.84151e-11	1.82186e-11
29.48	1.8415e-11	1.82225e-11
29.5	1.84122e-11	1.82124e-11
29.52	1.8417e-11	1.8216e-11
29.54	1.84167e-11	1.82176e-11
29.56	1.84131e-11	1.82148e-11
29.58	1.84145e-11	1.82157e-11
29.6	1.84092e-11	1.82188e-11
29.62	1.84132e-11	1.82141e-11
29.64	1.84146e-11	1.82212e-11
29.66	1.84206e-11	1.82212e-11
29.68	1.84221e-11	1.8213e-11
29.7	1.8416e-11	1.82161e-11
29.72	1.84172e-11	1.82124e-11
29.74	1.84149e-11	1.82195e-11
29.76	1.84197e-11	1.82212e-11
29.78	1.8418e-11	1.82207e-11
29.8	1.84203e-11	1.82184e-11
29.82	1.84166e-11	1.82142e-11
29.84	1.84195e-11	1.82216e-11
29.86	1.84164e-11	1.82197e-11
29.88	1.84137e-11	1.82163e-11
29.9	1.84217e-11	1.82173e-11
29.92	1.84192e-11	1.82219e-11
29.94	1.84156e-11	1.82213e-11
29.96	1.84147e-11	1.82218e-11
29.98	1.8417e-11	1.82258e-11
30	1.84182e-11	1.82284e-11
30.02	1.84164e-11	1.82248e-11
30.04	1.84151e-11	1.82217e-11
30.06	1.84157e-11	1.82181e-11
30.08	1.84153e-11	1.82212e-11
30.1	1.84129e-11	1.82216e-11
30.12	1.84189e-11	1.82203e-11
30.14	1.84158e-11	1.82232e-11
30.16	1.84188e-11	1.82249e-11
30.18	1.84195e-11	1.82241e-11
30.2	1.84247e-11	1.82202e-11
30.22	1.84117e-11	1.82222e-11
30.24	1.84163e-11	1.82295e-11
30.26	1.84244e-11	1.82188e-11
30.28	1.84179e-11	1.8221e-11
30.3	1.8424e-11	1.82247e-11
30.32	1.8421e-11	1.82222e-11
30.34	1.84199e-11	1.82173e-11
30.36	1.84203e-11	1.82219e-11
30.38	1.8421e-11	1.82246e-11
30.4	1.84175e-11	1.82291e-11
30.42	1.84166e-11	1.82151e-11
30.44	1.84228e-11	1.82211e-11
30.46	1.84162e-11	1.82239e-11
30.48	1.84197e-11	1.82205e-11
30.5	1.84275e-11	1.82252e-11
30.52	1.84181e-11	1.82282e-11
30.54	1.84246e-11	1.82235e-11
30.56	1.84211e-11	1.82243e-11
30.58	1.84288e-11	1.8222e-11
30.6	1.84247e-11	1.82253e-11
30.62	1.84211e-11	1.82225e-11
30.64	1.84278e-11	1.82227e-11
30.66	1.84253e-11	1.82352e-11
30.68	1.84209e-11	1.82262e-11
30.7	1.84212e-11	1.82309e-11
30.72	1.84232e-11	1.82308e-11
30.74	1.84239e-11	1.82232e-11
30.76	1.84207e-11	1.822e-11
30.78	1.84272e-11	1.82296e-11
30.8	1.84264e-11	1.82275e-11
30.82	1.84252e-11	1.82191e-11
30.84	1.84192e-11	1.82362e-11
30.86	1.84226e-11	1.82302e-11
30.88	1.84196e-11	1.82363e-11
30.9	1.84236e-11	1.82321e-11
30.92	1.84285e-11	1.82268e-11
30.94	1.84307e-11	1.82319e-11
30.96	1.8425e-11	1.82287e-11
30.98	1.84237e-11	1.82301e-11
31	1.84285e-11	1.82343e-11
31.02	1.84223e-11	1.82355e-11
31.04	1.84229e-11	1.82283e-11
31.06	1.84278e-11	1.82319e-11
31.08	1.84267e-11	1.82331e-11
31.1	1.84246e-11	1.823e-11
31.12	1.84273e-11	1.82325e-11
31.14	1.84258e-11	1.82275e-11
31.16	1.84271e-11	1.82306e-11
31.18	1.84323e-11	1.82335e-11
31.2	1.84223e-11	1.82353e-11
31.22	1.84253e-11	1.82345e-11
31.24	1.84305e-11	1.82328e-11
31.26	1.84271e-11	1.8242e-11
31.28	1.84314e-11	1.8232e-11
31.3	1.8424e-11	1.8235e-11
31.32	1.84267e-11	1.82369e-11
31.34	1.84269e-11	1.82343e-11
31.36	1.84265e-11	1.82349e-11
31.38	1.84282e-11	1.82354e-11
31.4	1.84314e-11	1.82315e-11
31.42	1.8431e-11	1.82329e-11
31.44	1.84274e-11	1.82337e-11
31.46	1.84261e-11	1.82398e-11
31.48	1.84322e-11	1.82299e-11
31.5	1.84321e-11	1.82424e-11
31.52	1.84342e-11	1.82396e-11
31.54	1.84315e-11	1.82405e-11
31.56	1.84296e-11	1.82357e-11
31.58	1.84304e-11	1.82389e-11
31.6	1.8434e-11	1.82348e-11
31.62	1.84245e-11	1.82382e-11
31.64	1.84298e-11	1.82481e-11
31.66	1.8434e-11	1.82396e-11
31.68	1.84325e-11	1.82385e-11
31.7	1.84322e-11	1.82437e-11
31.72	1.84319e-11	1.82339e-11
31.74	1.84372e-11	1.82376e-11
31.76	1.84341e-11	1.82418e-11
31.78	1.84351e-11	1.82375e-11
31.8	1.84258e-11	1.82369e-11
31.82	1.84333e-11	1.82383e-11
31.84	1.84256e-11	1.82393e-11
31.86	1.84266e-11	1.82391e-11
31.88	1.84378e-11	1.8241e-11
31.9	1.84318e-11	1.82389e-11
31.92	1.84311e-11	1.82444e-11
31.94	1.84317e-11	1.82419e-11
31.96	1.84373e-11	1.82417e-11
31.98	1.84302e-11	1.82356e-11
32	1.8433e-11	1.82396e-11
32.02	1.84369e-11	1.82472e-11
32.04	1.84292e-11	1.8243e-11
32.06	1.84361e-11	1.82459e-11
32.08	1.84352e-11	1.82377e-11
32.1	1.84327e-11	1.82414e-11
32.12	1.8436e-11	1.82413e-11
32.14	1.84333e-11	1.82423e-11
32.16	1.84392e-11	1.8241e-11
32.18	1.84332e-11	1.82457e-11
32.2	1.84335e-11	1.82509e-11
32.22	1.84341e-11	1.82456e-11
32.24	1.8439e-11	1.82455e-11
32.26	1.84335e-11	1.82416e-11
32.28	1.84324e-11	1.8244e-11
32.3	1.84371e-11	1.82489e-11
32.32	1.8436e-11	1.82481e-11
32.34	1.84377e-11	1.82489e-11
32.36	1.84373e-11	1.82407e-11
32.38	1.84341e-11	1.82451e-11
32.4	1.84353e-11	1.82491e-11
32.42	1.84362e-11	1.82484e-11
32.44	1.84353e-11	1.82444e-11
32.46	1.84356e-11	1.82417e-11
32.48	1.84375e-11	1.82459e-11
32.5	1.8442e-11	1.82472e-11
32.52	1.84342e-11	1.82402e-11
32.54	1.84366e-11	1.82459e-11
32.56	1.84324e-11	1.82411e-11
32.58	1.84415e-11	1.82456e-11
32.6	1.84402e-11	1.82496e-11
32.62	1.84419e-11	1.82477e-11
32.64	1.84343e-11	1.82499e-11
32.66	1.84404e-11	1.8244e-11
32.68	1.84365e-11	1.82536e-11
32.7	1.84352e-11	1.82516e-11
32.72	1.84359e-11	1.8248e-11
32.74	1.8435e-11	1.82441e-11
32.76	1.8434e-11	1.82432e-11
32.78	1.84379e-11	1.82498e-11
32.8	1.84361e-11	1.82504e-11
32.82	1.84365e-11	1.82468e-11
32.84	1.84426e-11	1.82466e-11
32.86	1.84379e-11	1.8247e-11
32.88	1.84346e-11	1.82473e-11
32.9	1.84363e-11	1.82504e-11
32.92	1.84375e-11	1.82515e-11
32.94	1.84405e-11	1.82534e-11
32.96	1.84356e-11	1.82504e-11
32.98	1.84374e-11	1.8252e-11
33	1.84399e-11	1.82464e-11
33.02	1.84393e-11	1.82505e-11
33.04	1.84378e-11	1.82492e-11
33.06	1.84451e-11	1.82576e-11
33.08	1.84387e-11	1.82506e-11
33.1	1.84371e-11	1.82539e-11
33.12	1.84444e-11	1.82558e-11
33.14	1.84407e-11	1.82519e-11
33.16	1.84442e-11	1.82512e-11
33.18	1.84441e-11	1.82511e-11
33.2	1.84416e-11	1.82565e-11
33.22	1.84373e-11	1.82601e-11
33.24	1.84469e-11	1.82537e-11
33.26	1.84376e-11	1.82511e-11
33.28	1.84439e-11	1.82508e-11
33.3	1.84435e-11	1.82545e-11
33.32	1.84397e-11	1.82552e-11
33.34	1.84435e-11	1.8249e-11
33.36	1.84466e-11	1.82531e-11
33.38	1.84452e-11	1.82572e-11
33.4	1.84452e-11	1.82561e-11
33.42	1.84434e-11	1.8254e-11
33.44	1.84481e-11	1.82578e-11
33.46	1.84389e-11	1.82528e-11
33.48	1.84403e-11	1.82578e-11
33.5	1.8443e-11	1.82581e-11
33.52	1.8445e-11	1.82558e-11
33.54	1.84485e-11	1.82536e-11
33.56	1.84447e-11	1.82534e-11
33.58	1.84474e-11	1.82601e-11
33.6	1.84459e-11	1.82532e-11
33.62	1.84443e-11	1.82509e-11
33.64	1.84424e-11	1.82542e-11
33.66	1.8446e-11	1.8258e-11
33.68	1.84444e-11	1.82639e-11
33.7	1.84461e-11	1.82619e-11
33.72	1.84461e-11	1.82556e-11
33.74	1.8444e-11	1.82604e-11
33.76	1.84488e-11	1.8254e-11
33.78	1.84415e-11	1.82592e-11
33.8	1.84503e-11	1.82576e-11
33.82	1.84496e-11	1.8261e-11
33.84	1.84508e-11	1.82588e-11
33.86	1.8447e-11	1.82524e-11
33.88	1.84397e-11	1.82622e-11
33.9	1.84464e-11	1.82597e-11
33.92	1.84544e-11	1.82562e-11
33.94	1.8451e-11	1.82574e-11
33.96	1.8441e-11	1.82551e-11
33.98	1.84518e-11	1.82526e-11
34	1.84478e-11	1.82603e-11
34.02	1.84471e-11	1.82551e-11
34.04	1.84531e-11	1.82506e-11
34.06	1.84521e-11	1.82584e-11
34.08	1.84504e-11	1.82568e-11
34.1	1.84449e-11	1.82594e-11
34.12	1.84493e-11	1.82568e-11
34.14	1.84512e-11	1.82613e-11
34.16	1.8453e-11	1.82593e-11
34.18	1.84546e-11	1.8261e-11
34.2	1.8446e-11	1.82557e-11
34.22	1.84527e-11	1.82609e-11
34.24	1.84447e-11	1.82589e-11
34.26	1.84541e-11	1.82599e-11
34.28	1.84527e-11	1.8257e-11
34.3	1.84469e-11	1.82593e-11
34.32	1.84453e-11	1.82629e-11
34.34	1.84513e-11	1.82641e-11
34.36	1.84521e-11	1.8259e-11
34.38	1.84499e-11	1.82621e-11
34.4	1.84506e-11	1.8263e-11
34.42	1.84541e-11	1.82563e-11
34.44	1.84519e-11	1.8257e-11
34.46	1.84501e-11	1.82603e-11
34.48	1.84508e-11	1.82578e-11
34.5	1.84494e-11	1.82634e-11
34.52	1.84441e-11	1.82608e-11
34.54	1.84452e-11	1.82708e-11
34.56	1.84533e-11	1.82664e-11
34.58	1.84522e-11	1.82641e-11
34.6	1.84566e-11	1.82579e-11
34.62	1.84538e-11	1.82631e-11
34.64	1.84552e-11	1.82564e-11
34.66	1.84582e-11	1.82567e-11
34.68	1.84533e-11	1.8264e-11
34.7	1.8453e-11	1.82624e-11
34.72	1.84523e-11	1.82658e-11
34.74	1.84486e-11	1.82653e-11
34.76	1.8454e-11	1.8264e-11
34.78	1.8453e-11	1.82624e-11
34.8	1.84516e-11	1.826e-11
34.82	1.84533e-11	1.8263e-11
34.84	1.84515e-11	1.82615e-11
34.86	1.84526e-11	1.82673e-11
34.88	1.84502e-11	1.82653e-11
34.9	1.84469e-11	1.82679e-11
34.92	1.84537e-11	1.82592e-11
34.94	1.84567e-11	1.82618e-11
34.96	1.84589e-11	1.82685e-11
34.98	1.84488e-11	1.82653e-11
35	1.84506e-11	1.82616e-11
35.02	1.8456e-11	1.82634e-11
35.04	1.84527e-11	1.82663e-11
35.06	1.84493e-11	1.82654e-11
35.08	1.84557e-11	1.82603e-11
35.1	1.84549e-11	1.82661e-11
35.12	1.84573e-11	1.82745e-11
35.14	1.84572e-11	1.8265e-11
35.16	1.84536e-11	1.82597e-11
35.18	1.84568e-11	1.82647e-11
35.2	1.84593e-11	1.82661e-11
35.22	1.84581e-11	1.82665e-11
35.24	1.84538e-11	1.82716e-11
35.26	1.84546e-11	1.82704e-11
35.28	1.84597e-11	1.82699e-11
35.3	1.8462e-11	1.82646e-11
35.32	1.846e-11	1.82764e-11
35.34	1.84536e-11	1.82678e-11
35.36	1.84667e-11	1.82723e-11
35.38	1.84538e-11	1.82671e-11
35.4	1.84615e-11	1.82759e-11
35.42	1.84566e-11	1.8273e-11
35.44	1.84613e-11	1.82747e-11
35.46	1.84653e-11	1.82725e-11
35.48	1.84599e-11	1.82688e-11
35.5	1.84551e-11	1.82688e-11
35.52	1.84533e-11	1.82658e-11
35.54	1.84641e-11	1.82751e-11
35.56	1.84605e-11	1.82709e-11
35.58	1.84528e-11	1.82727e-11
35.6	1.84579e-11	1.82714e-11
35.62	1.84595e-11	1.8266e-11
35.64	1.8463e-11	1.82772e-11
35.66	1.84612e-11	1.82783e-11
35.68	1.84625e-11	1.82723e-11
35.7	1.84628e-11	1.82669e-11
35.72	1.8464e-11	1.8279e-11
35.74	1.8457e-11	1.82689e-11
35.76	1.84578e-11	1.82691e-11
35.78	1.84575e-11	1.82762e-11
35.8	1.84606e-11	1.8272e-11
35.82	1.84622e-11	1.82728e-11
35.84	1.8468e-11	1.82712e-11
35.86	1.8467e-11	1.82716e-11
35.88	1.84696e-11	1.82705e-11
35.9	1.84575e-11	1.82749e-11
35.92	1.84583e-11	1.82707e-11
35.94	1.84631e-11	1.82709e-11
35.96	1.84689e-11	1.82717e-11
35.98	1.84597e-11	1.82712e-11
36	1.84607e-11	1.82758e-11
36.02	1.84615e-11	1.82743e-11
36.04	1.84643e-11	1.82766e-11
36.06	1.84699e-11	1.82777e-11
36.08	1.8461e-11	1.82718e-11
36.1	1.84635e-11	1.82752e-11
36.12	1.8467e-11	1.82762e-11
36.14	1.84646e-11	1.82756e-11
36.16	1.84678e-11	1.82785e-11
36.18	1.84659e-11	1.82802e-11
36.2	1.84615e-11	1.8276e-11
36.22	1.84639e-11	1.82775e-11
36.24	1.84672e-11	1.82783e-11
36.26	1.84717e-11	1.82781e-11
36.28	1.84614e-11	1.82775e-11
36.3	1.84661e-11	1.82816e-11
36.32	1.84673e-11	1.82757e-11
36.34	1.8462e-11	1.82752e-11
36.36	1.84658e-11	1.82779e-11
36.38	1.8473e-11	1.82782e-11
36.4	1.84655e-11	1.82803e-11
36.42	1.84651e-11	1.82812e-11
36.44	1.84658e-11	1.82827e-11
36.46	1.8472e-11	1.82778e-11
36.48	1.84696e-11	1.82771e-11
36.5	1.84681e-11	1.82734e-11
36.52	1.84724e-11	1.8278e-11
36.54	1.84703e-11	1.82815e-11
36.56	1.84721e-11	1.82761e-11
36.58	1.84701e-11	1.8282e-11
36.6	1.84688e-11	1.82775e-11
36.62	1.84696e-11	1.82741e-11
36.64	1.84669e-11	1.8279e-11
36.66	1.84708e-11	1.82804e-11
36.68	1.84695e-11	1.82763e-11
36.7	1.84653e-11	1.82809e-11
36.72	1.84669e-11	1.82794e-11
36.74	1.84649e-11	1.82846e-11
36.76	1.84721e-11	1.8281e-11
36.78	1.84658e-11	1.82796e-11
36.8	1.84711e-11	1.82791e-11
36.82	1.84703e-11	1.82803e-11
36.84	1.84672e-11	1.82837e-11
36.86	1.84738e-11	1.82863e-11
36.88	1.84679e-11	1.82792e-11
36.9	1.84718e-11	1.8281e-11
36.92	1.84732e-11	1.82818e-11
36.94	1.84737e-11	1.82806e-11
36.96	1.84715e-11	1.82871e-11
36.98	1.84727e-11	1.82835e-11
37	1.84702e-11	1.82841e-11
37.02	1.84689e-11	1.82817e-11
37.04	1.84722e-11	1.82875e-11
37.06	1.84676e-11	1.82889e-11
37.08	1.84764e-11	1.82822e-11
37.1	1.8468e-11	1.82774e-11
37.12	1.84691e-11	1.8282e-11
37.14	1.84728e-11	1.82932e-11
37.16	1.84755e-11	1.82873e-11
37.18	1.8468e-11	1.82878e-11
37.2	1.84804e-11	1.82874e-11
37.22	1.84725e-11	1.82844e-11
37.24	1.84723e-11	1.82886e-11
37.26	1.84779e-11	1.82896e-11
37.28	1.84766e-11	1.82825e-11
37.3	1.84699e-11	1.82925e-11
37.32	1.84672e-11	1.82893e-11
37.34	1.84668e-11	1.82874e-11
37.36	1.84704e-11	1.82875e-11
37.38	1.84715e-11	1.82874e-11
37.4	1.84686e-11	1.8284e-11
37.42	1.84732e-11	1.82868e-11
37.44	1.84773e-11	1.82826e-11
37.46	1.84776e-11	1.82917e-11
37.48	1.84769e-11	1.82891e-11
37.5	1.84725e-11	1.82881e-11
37.52	1.84687e-11	1.82911e-11
37.54	1.84764e-11	1.82883e-11
37.56	1.84742e-11	1.82925e-11
37.58	1.8473e-11	1.82859e-11
37.6	1.84725e-11	1.829e-11
37.62	1.84708e-11	1.8289e-11
37.64	1.84801e-11	1.82944e-11
37.66	1.84768e-11	1.82858e-11
37.68	1.84734e-11	1.8289e-11
37.7	1.84695e-11	1.82906e-11
37.72	1.84734e-11	1.82831e-11
37.74	1.84762e-11	1.82924e-11
37.76	1.84712e-11	1.82938e-11
37.78	1.8473e-11	1.829e-11
37.8	1.84752e-11	1.82896e-11
37.82	1.84757e-11	1.82926e-11
37.84	1.84771e-11	1.82934e-11
37.86	1.84747e-11	1.82983e-11
37.88	1.84792e-11	1.82918e-11
37.9	1.8476e-11	1.82968e-11
37.92	1.8478e-11	1.82974e-11
37.94	1.84769e-11	1.82976e-11
37.96	1.84819e-11	1.8292e-11
37.98	1.84788e-11	1.82973e-11
38	1.84739e-11	1.82923e-11
38.02	1.84773e-11	1.82991e-11
38.04	1.84772e-11	1.82962e-11
38.06	1.84806e-11	1.82894e-11
38.08	1.84773e-11	1.82911e-11
38.1	1.8483e-11	1.82946e-11
38.12	1.84819e-11	1.82963e-11
38.14	1.84745e-11	1.82967e-11
38.16	1.84796e-11	1.82983e-11
38.18	1.84764e-11	1.82949e-11
38.2	1.84755e-11	1.82944e-11
38.22	1.84743e-11	1.82967e-11
38.24	1.84721e-11	1.82955e-11
38.26	1.847e-11	1.82936e-11
38.28	1.84746e-11	1.8298e-11
38.3	1.84732e-11	1.82984e-11
38.32	1.84792e-11	1.82974e-11
38.34	1.84816e-11	1.82993e-11
38.36	1.8476e-11	1.82954e-11
38.38	1.84823e-11	1.83e-11
38.4	1.84795e-11	1.82999e-11
38.42	1.84831e-11	1.8299e-11
38.44	1.84821e-11	1.82936e-11
38.46	1.84844e-11	1.83011e-11
38.48	1.8478e-11	1.8297e-11
38.5	1.8479e-11	1.82998e-11
38.52	1.84797e-11	1.8301e-11
38.54	1.84831e-11	1.83004e-11
38.56	1.84743e-11	1.82983e-11
38.58	1.84802e-11	1.82961e-11
38.6	1.84744e-11	1.83026e-11
38.62	1.84802e-11	1.82994e-11
38.64	1.84783e-11	1.82951e-11
38.66	1.84807e-11	1.83023e-11
38.68	1.84813e-11	1.83051e-11
38.7	1.84859e-11	1.82977e-11
38.72	1.84756e-11	1.83054e-11
38.74	1.84837e-11	1.82998e-11
38.76	1.84786e-11	1.82999e-11
38.78	1.84775e-11	1.83109e-11
38.8	1.84789e-11	1.83053e-11
38.82	1.84812e-11	1.83034e-11
38.84	1.84801e-11	1.83028e-11
38.86	1.8484e-11	1.83012e-11
38.88	1.84805e-11	1.83099e-11
38.9	1.84775e-11	1.8301e-11
38.92	1.84767e-11	1.83053e-11
38.94	1.84816e-11	1.83006e-11
38.96	1.84837e-11	1.83038e-11
38.98	1.84827e-11	1.8303e-11
39	1.84798e-11	1.83043e-11
39.02	1.84809e-11	1.8303e-11
39.04	1.84849e-11	1.83094e-11
39.06	1.84776e-11	1.8305e-11
39.08	1.84796e-11	1.83065e-11
39.1	1.84775e-11	1.83033e-11
39.12	1.8478e-11	1.83084e-11
39.14	1.84777e-11	1.8304e-11
39.16	1.84786e-11	1.83046e-11
39.18	1.84764e-11	1.83026e-11
39.2	1.84782e-11	1.83075e-11
39.22	1.8477e-11	1.83104e-11
39.24	1.84814e-11	1.83045e-11
39.26	1.84775e-11	1.83023e-11
39.28	1.84797e-11	1.83052e-11
39.3	1.84794e-11	1.83124e-11
39.32	1.8479e-11	1.8309e-11
39.34	1.84823e-11	1.83079e-11
39.36	1.84771e-11	1.83095e-11
39.38	1.84841e-11	1.83004e-11
39.4	1.84746e-11	1.83065e-11
39.42	1.84846e-11	1.83105e-11
39.44	1.8479e-11	1.83095e-11
39.46	1.84789e-11	1.83061e-11
39.48	1.84857e-11	1.83094e-11
39.5	1.84843e-11	1.83042e-11
39.52	1.84843e-11	1.83065e-11
39.54	1.84815e-11	1.83077e-11
39.56	1.84864e-11	1.83128e-11
39.58	1.84823e-11	1.83147e-11
39.6	1.84815e-11	1.83101e-11
39.62	1.84851e-11	1.83078e-11
39.64	1.84833e-11	1.83108e-11
39.66	1.84837e-11	1.83079e-11
39.68	1.84857e-11	1.83139e-11
39.7	1.84833e-11	1.83053e-11
39.72	1.84858e-11	1.83093e-11
39.74	1.84831e-11	1.83057e-11
39.76	1.84927e-11	1.83055e-11
39.78	1.84851e-11	1.83107e-11
39.8	1.84772e-11	1.83109e-11
39.82	1.84804e-11	1.83103e-11
39.84	1.84853e-11	1.83136e-11
39.86	1.84815e-11	1.83086e-11
39.88	1.84841e-11	1.83077e-11
39.9	1.84846e-11	1.83078e-11
39.92	1.8488e-11	1.83112e-11
39.94	1.84872e-11	1.83097e-11
39.96	1.84931e-11	1.83113e-11
[truncated: 4,002 more rows]

## Sheet: 17n06071-085.abf
	Cm(F)
time (ms)	100uM 5-HT	100uM cocaine
0.02	2.21321e-11	2.18624e-11
0.04	2.21408e-11	2.18664e-11
0.06	2.21407e-11	2.18574e-11
0.08	2.21303e-11	2.18654e-11
0.1	2.21352e-11	2.18585e-11
0.12	2.21358e-11	2.18532e-11
0.14	2.21341e-11	2.18576e-11
0.16	2.21389e-11	2.18661e-11
0.18	2.21438e-11	2.18582e-11
0.2	2.21395e-11	2.18609e-11
0.22	2.21394e-11	2.18603e-11
0.24	2.21366e-11	2.18672e-11
0.26	2.21399e-11	2.18614e-11
0.28	2.21388e-11	2.18674e-11
0.3	2.21397e-11	2.18605e-11
0.32	2.21333e-11	2.18545e-11
0.34	2.21339e-11	2.18702e-11
0.36	2.21372e-11	2.18611e-11
0.38	2.21364e-11	2.18644e-11
0.4	2.2136e-11	2.18646e-11
0.42	2.21352e-11	2.18669e-11
0.44	2.21353e-11	2.18638e-11
0.46	2.21375e-11	2.18655e-11
0.48	2.21379e-11	2.18698e-11
0.5	2.21411e-11	2.18697e-11
0.52	2.21397e-11	2.18638e-11
0.54	2.21405e-11	2.18656e-11
0.56	2.21319e-11	2.18608e-11
0.58	2.21359e-11	2.18688e-11
0.6	2.21309e-11	2.18667e-11
0.62	2.21353e-11	2.18658e-11
0.64	2.21378e-11	2.18553e-11
0.66	2.21347e-11	2.18612e-11
0.68	2.21323e-11	2.18716e-11
0.7	2.21354e-11	2.18678e-11
0.72	2.21361e-11	2.18616e-11
0.74	2.21367e-11	2.18657e-11
0.76	2.21412e-11	2.1869e-11
0.78	2.21398e-11	2.18554e-11
0.8	2.21382e-11	2.18671e-11
0.82	2.2138e-11	2.18639e-11
0.84	2.21351e-11	2.18662e-11
0.86	2.21362e-11	2.18677e-11
0.88	2.2131e-11	2.18625e-11
0.9	2.21325e-11	2.18663e-11
0.92	2.2134e-11	2.18645e-11
0.94	2.21387e-11	2.18658e-11
0.96	2.21381e-11	2.18649e-11
0.98	2.21381e-11	2.18604e-11
1	2.21396e-11	2.18649e-11
1.02	2.21315e-11	2.18613e-11
1.04	2.2136e-11	2.18635e-11
1.06	2.21321e-11	2.18669e-11
1.08	2.21337e-11	2.18641e-11
1.1	2.21342e-11	2.18678e-11
1.12	2.21309e-11	2.187e-11
1.14	2.21355e-11	2.18675e-11
1.16	2.21318e-11	2.18694e-11
1.18	2.21297e-11	2.18629e-11
1.2	2.21373e-11	2.1865e-11
1.22	2.21312e-11	2.18686e-11
1.24	2.21352e-11	2.18736e-11
1.26	2.21384e-11	2.18685e-11
1.28	2.21279e-11	2.18624e-11
1.3	2.21361e-11	2.18697e-11
1.32	2.21377e-11	2.18725e-11
1.34	2.21379e-11	2.18627e-11
1.36	2.21328e-11	2.18677e-11
1.38	2.2131e-11	2.18693e-11
1.4	2.21322e-11	2.18672e-11
1.42	2.21346e-11	2.18667e-11
1.44	2.2134e-11	2.18716e-11
1.46	2.21324e-11	2.18708e-11
1.48	2.21379e-11	2.18648e-11
1.5	2.21394e-11	2.18701e-11
1.52	2.21361e-11	2.18643e-11
1.54	2.21355e-11	2.18642e-11
1.56	2.2136e-11	2.18727e-11
1.58	2.2138e-11	2.18633e-11
1.6	2.21309e-11	2.18706e-11
1.62	2.21336e-11	2.18701e-11
1.64	2.21361e-11	2.18703e-11
1.66	2.21357e-11	2.1874e-11
1.68	2.21338e-11	2.18678e-11
1.7	2.2138e-11	2.18656e-11
1.72	2.21356e-11	2.18578e-11
1.74	2.21395e-11	2.1868e-11
1.76	2.21315e-11	2.18676e-11
1.78	2.21287e-11	2.18609e-11
1.8	2.21361e-11	2.18651e-11
1.82	2.2133e-11	2.18689e-11
1.84	2.21362e-11	2.18595e-11
1.86	2.2136e-11	2.18722e-11
1.88	2.21351e-11	2.18653e-11
1.9	2.21432e-11	2.18624e-11
1.92	2.21366e-11	2.18704e-11
1.94	2.21398e-11	2.18711e-11
1.96	2.21374e-11	2.18714e-11
1.98	2.21391e-11	2.18712e-11
2	2.21323e-11	2.18638e-11
2.02	2.21417e-11	2.1867e-11
2.04	2.21413e-11	2.18709e-11
2.06	2.21363e-11	2.18697e-11
2.08	2.21363e-11	2.18682e-11
2.1	2.2137e-11	2.18708e-11
2.12	2.21332e-11	2.18663e-11
2.14	2.21405e-11	2.18695e-11
2.16	2.2139e-11	2.18733e-11
2.18	2.21324e-11	2.18715e-11
2.2	2.21284e-11	2.1869e-11
2.22	2.21338e-11	2.18663e-11
2.24	2.2136e-11	2.18686e-11
2.26	2.2136e-11	2.18736e-11
2.28	2.21344e-11	2.18704e-11
2.3	2.21358e-11	2.18783e-11
2.32	2.21375e-11	2.1864e-11
2.34	2.21327e-11	2.187e-11
2.36	2.21351e-11	2.18703e-11
2.38	2.21414e-11	2.18727e-11
2.4	2.21358e-11	2.18683e-11
2.42	2.21377e-11	2.18774e-11
2.44	2.2138e-11	2.18763e-11
2.46	2.21349e-11	2.18726e-11
2.48	2.21382e-11	2.18708e-11
2.5	2.21347e-11	2.1874e-11
2.52	2.21384e-11	2.18674e-11
2.54	2.21384e-11	2.18716e-11
2.56	2.21414e-11	2.18739e-11
2.58	2.21386e-11	2.18779e-11
2.6	2.21368e-11	2.18736e-11
2.62	2.21343e-11	2.18705e-11
2.64	2.21403e-11	2.18658e-11
2.66	2.21451e-11	2.18661e-11
2.68	2.21422e-11	2.18683e-11
2.7	2.21366e-11	2.18682e-11
2.72	2.21325e-11	2.18598e-11
2.74	2.2135e-11	2.1872e-11
2.76	2.21384e-11	2.18742e-11
2.78	2.21384e-11	2.18643e-11
2.8	2.21341e-11	2.18633e-11
2.82	2.21406e-11	2.18728e-11
2.84	2.21438e-11	2.1876e-11
2.86	2.2138e-11	2.18735e-11
2.88	2.21342e-11	2.18811e-11
2.9	2.21337e-11	2.18673e-11
2.92	2.21302e-11	2.18647e-11
2.94	2.21397e-11	2.18658e-11
2.96	2.21408e-11	2.18734e-11
2.98	2.2139e-11	2.18738e-11
3	2.21409e-11	2.18738e-11
3.02	2.21398e-11	2.18712e-11
3.04	2.21347e-11	2.18695e-11
3.06	2.21339e-11	2.18659e-11
3.08	2.2129e-11	2.18745e-11
3.1	2.21353e-11	2.18752e-11
3.12	2.21355e-11	2.18762e-11
3.14	2.21385e-11	2.18723e-11
3.16	2.21277e-11	2.18734e-11
3.18	2.21345e-11	2.18668e-11
3.2	2.21353e-11	2.18776e-11
3.22	2.21383e-11	2.18705e-11
3.24	2.21392e-11	2.18776e-11
3.26	2.21386e-11	2.1879e-11
3.28	2.21332e-11	2.1864e-11
3.3	2.21363e-11	2.18738e-11
3.32	2.21313e-11	2.18736e-11
3.34	2.21382e-11	2.18704e-11
3.36	2.21406e-11	2.18805e-11
3.38	2.21323e-11	2.18709e-11
3.4	2.21326e-11	2.1877e-11
3.42	2.21426e-11	2.18767e-11
3.44	2.21374e-11	2.18738e-11
3.46	2.21428e-11	2.1871e-11
3.48	2.21327e-11	2.18782e-11
3.5	2.21332e-11	2.18697e-11
3.52	2.21344e-11	2.18711e-11
3.54	2.21355e-11	2.187e-11
3.56	2.21325e-11	2.18693e-11
3.58	2.21388e-11	2.18714e-11
3.6	2.21354e-11	2.18677e-11
3.62	2.21343e-11	2.18752e-11
3.64	2.21292e-11	2.18744e-11
3.66	2.21354e-11	2.1875e-11
3.68	2.2139e-11	2.18774e-11
3.7	2.21323e-11	2.18744e-11
3.72	2.21383e-11	2.18751e-11
3.74	2.21335e-11	2.188e-11
3.76	2.21336e-11	2.18761e-11
3.78	2.21291e-11	2.18823e-11
3.8	2.2137e-11	2.18774e-11
3.82	2.2143e-11	2.18767e-11
3.84	2.21365e-11	2.18818e-11
3.86	2.21397e-11	2.18807e-11
3.88	2.21377e-11	2.18745e-11
3.9	2.21415e-11	2.18781e-11
3.92	2.21396e-11	2.18702e-11
3.94	2.21295e-11	2.18772e-11
3.96	2.21367e-11	2.18864e-11
3.98	2.21363e-11	2.18702e-11
4	2.21287e-11	2.18713e-11
4.02	2.21367e-11	2.18745e-11
4.04	2.21425e-11	2.18753e-11
4.06	2.21397e-11	2.18731e-11
4.08	2.214e-11	2.18742e-11
4.1	2.21364e-11	2.18806e-11
4.12	2.2135e-11	2.18786e-11
4.14	2.21449e-11	2.18792e-11
4.16	2.21287e-11	2.18818e-11
4.18	2.21352e-11	2.18706e-11
4.2	2.2136e-11	2.18755e-11
4.22	2.21338e-11	2.18784e-11
4.24	2.21348e-11	2.18734e-11
4.26	2.21361e-11	2.18788e-11
4.28	2.21336e-11	2.18782e-11
4.3	2.21331e-11	2.18769e-11
4.32	2.2136e-11	2.18698e-11
4.34	2.21319e-11	2.1876e-11
4.36	2.21395e-11	2.18735e-11
4.38	2.2139e-11	2.18796e-11
4.4	2.21214e-11	2.18764e-11
4.42	2.21286e-11	2.18786e-11
4.44	2.2134e-11	2.18725e-11
4.46	2.21313e-11	2.18782e-11
4.48	2.21324e-11	2.1874e-11
4.5	2.21376e-11	2.18826e-11
4.52	2.21392e-11	2.18772e-11
4.54	2.21368e-11	2.18807e-11
4.56	2.21418e-11	2.1872e-11
4.58	2.2134e-11	2.18767e-11
4.6	2.21367e-11	2.18744e-11
4.62	2.21406e-11	2.18745e-11
4.64	2.21305e-11	2.18741e-11
4.66	2.21352e-11	2.18788e-11
4.68	2.21337e-11	2.18728e-11
4.7	2.21424e-11	2.1877e-11
4.72	2.21401e-11	2.18793e-11
4.74	2.21403e-11	2.1882e-11
4.76	2.21387e-11	2.18809e-11
4.78	2.21397e-11	2.18807e-11
4.8	2.21342e-11	2.18834e-11
4.82	2.21374e-11	2.188e-11
4.84	2.21356e-11	2.18742e-11
4.86	2.21332e-11	2.1875e-11
4.88	2.21379e-11	2.18772e-11
4.9	2.21374e-11	2.18774e-11
4.92	2.21295e-11	2.1881e-11
4.94	2.21377e-11	2.18777e-11
4.96	2.21375e-11	2.18757e-11
4.98	2.21387e-11	2.18796e-11
5	2.2138e-11	2.18744e-11
5.02	2.21327e-11	2.18826e-11
5.04	2.21403e-11	2.18769e-11
5.06	2.21328e-11	2.18733e-11
5.08	2.21261e-11	2.18754e-11
5.1	2.21287e-11	2.18715e-11
5.12	2.21283e-11	2.18732e-11
5.14	2.21347e-11	2.18718e-11
5.16	2.21277e-11	2.18723e-11
5.18	2.21295e-11	2.1878e-11
5.2	2.21291e-11	2.18783e-11
5.22	2.2134e-11	2.18677e-11
5.24	2.21338e-11	2.18653e-11
5.26	2.21315e-11	2.18792e-11
5.28	2.21299e-11	2.18766e-11
5.3	2.2133e-11	2.18728e-11
5.32	2.2131e-11	2.18729e-11
5.34	2.21313e-11	2.18677e-11
5.36	2.21301e-11	2.18729e-11
5.38	2.21295e-11	2.18787e-11
5.4	2.21282e-11	2.18815e-11
5.42	2.21301e-11	2.1873e-11
5.44	2.21313e-11	2.18693e-11
5.46	2.21285e-11	2.18758e-11
5.48	2.21348e-11	2.18789e-11
5.5	2.21319e-11	2.18784e-11
5.52	2.2136e-11	2.18723e-11
5.54	2.21337e-11	2.18719e-11
5.56	2.21334e-11	2.18682e-11
5.58	2.21353e-11	2.18645e-11
5.6	2.2132e-11	2.18773e-11
5.62	2.21372e-11	2.18746e-11
5.64	2.2136e-11	2.18638e-11
5.66	2.21381e-11	2.1866e-11
5.68	2.21287e-11	2.18742e-11
5.7	2.21323e-11	2.18778e-11
5.72	2.21409e-11	2.18679e-11
5.74	2.21335e-11	2.18687e-11
5.76	2.21338e-11	2.18659e-11
5.78	2.21344e-11	2.18669e-11
5.8	2.21318e-11	2.18723e-11
5.82	2.21377e-11	2.18751e-11
5.84	2.2132e-11	2.18771e-11
5.86	2.21371e-11	2.18765e-11
5.88	2.21279e-11	2.18775e-11
5.9	2.21284e-11	2.18736e-11
5.92	2.21314e-11	2.18763e-11
5.94	2.21294e-11	2.1873e-11
5.96	2.21302e-11	2.18742e-11
5.98	2.21345e-11	2.1878e-11
6	2.21307e-11	2.18704e-11
6.02	2.21296e-11	2.18793e-11
6.04	2.21342e-11	2.18702e-11
6.06	2.21371e-11	2.18622e-11
6.08	2.21327e-11	2.18723e-11
6.1	2.21372e-11	2.18736e-11
6.12	2.21329e-11	2.18703e-11
6.14	2.21287e-11	2.18701e-11
6.16	2.21367e-11	2.18747e-11
6.18	2.21358e-11	2.18747e-11
6.2	2.2132e-11	2.18808e-11
6.22	2.21361e-11	2.18774e-11
6.24	2.21385e-11	2.18755e-11
6.26	2.21273e-11	2.18706e-11
6.28	2.21274e-11	2.18792e-11
6.3	2.21296e-11	2.18848e-11
6.32	2.21308e-11	2.18778e-11
6.34	2.21352e-11	2.18826e-11
6.36	2.21238e-11	2.18775e-11
6.38	2.21339e-11	2.18754e-11
6.4	2.21321e-11	2.1874e-11
6.42	2.21361e-11	2.18788e-11
6.44	2.21336e-11	2.18732e-11
6.46	2.21365e-11	2.18741e-11
6.48	2.2133e-11	2.18688e-11
6.5	2.2137e-11	2.18634e-11
6.52	2.21287e-11	2.18681e-11
6.54	2.21354e-11	2.18754e-11
6.56	2.21297e-11	2.18752e-11
6.58	2.2132e-11	2.18863e-11
6.6	2.21284e-11	2.18783e-11
6.62	2.21329e-11	2.18822e-11
6.64	2.21322e-11	2.18803e-11
6.66	2.21341e-11	2.18758e-11
6.68	2.21317e-11	2.18764e-11
6.7	2.21311e-11	2.18727e-11
6.72	2.21349e-11	2.18791e-11
6.74	2.21349e-11	2.18747e-11
6.76	2.21343e-11	2.18816e-11
6.78	2.21262e-11	2.188e-11
6.8	2.21292e-11	2.18849e-11
6.82	2.21261e-11	2.18758e-11
6.84	2.21348e-11	2.18748e-11
6.86	2.21333e-11	2.18808e-11
6.88	2.21316e-11	2.18793e-11
6.9	2.2125e-11	2.18801e-11
6.92	2.21317e-11	2.18821e-11
6.94	2.21336e-11	2.18794e-11
6.96	2.21358e-11	2.18808e-11
6.98	2.21309e-11	2.18781e-11
7	2.21308e-11	2.18798e-11
7.02	2.21311e-11	2.18734e-11
7.04	2.21313e-11	2.18759e-11
7.06	2.21342e-11	2.18853e-11
7.08	2.21358e-11	2.18851e-11
7.1	2.21304e-11	2.18839e-11
7.12	2.21303e-11	2.18857e-11
7.14	2.21341e-11	2.18797e-11
7.16	2.21324e-11	2.18868e-11
7.18	2.2132e-11	2.18885e-11
7.2	2.21355e-11	2.18783e-11
7.22	2.21321e-11	2.18793e-11
7.24	2.21345e-11	2.18837e-11
7.26	2.21324e-11	2.18848e-11
7.28	2.21373e-11	2.18847e-11
7.3	2.21304e-11	2.18849e-11
7.32	2.21334e-11	2.18848e-11
7.34	2.21308e-11	2.18882e-11
7.36	2.21369e-11	2.18921e-11
7.38	2.2129e-11	2.18791e-11
7.4	2.21371e-11	2.18829e-11
7.42	2.21374e-11	2.18861e-11
7.44	2.2141e-11	2.18823e-11
7.46	2.21307e-11	2.1877e-11
7.48	2.21321e-11	2.1881e-11
7.5	2.21355e-11	2.18824e-11
7.52	2.21344e-11	2.18836e-11
7.54	2.21343e-11	2.18764e-11
7.56	2.21299e-11	2.18822e-11
7.58	2.21339e-11	2.18912e-11
7.6	2.21379e-11	2.18806e-11
7.62	2.21274e-11	2.18849e-11
7.64	2.21324e-11	2.18829e-11
7.66	2.21328e-11	2.18904e-11
7.68	2.21337e-11	2.18851e-11
7.7	2.21358e-11	2.18788e-11
7.72	2.21302e-11	2.18781e-11
7.74	2.21381e-11	2.18807e-11
7.76	2.21355e-11	2.18899e-11
7.78	2.21287e-11	2.18854e-11
7.8	2.21325e-11	2.18846e-11
7.82	2.21395e-11	2.18858e-11
7.84	2.21355e-11	2.18919e-11
7.86	2.2131e-11	2.18848e-11
7.88	2.21328e-11	2.18832e-11
7.9	2.21354e-11	2.18865e-11
7.92	2.21369e-11	2.18804e-11
7.94	2.21369e-11	2.18869e-11
7.96	2.21356e-11	2.18884e-11
7.98	2.21378e-11	2.18884e-11
8	2.21308e-11	2.18927e-11
8.02	2.21335e-11	2.18854e-11
8.04	2.21369e-11	2.18852e-11
8.06	2.21417e-11	2.18817e-11
8.08	2.21367e-11	2.1878e-11
8.1	2.2132e-11	2.18805e-11
8.12	2.21293e-11	2.18823e-11
8.14	2.21376e-11	2.18873e-11
8.16	2.21365e-11	2.18842e-11
8.18	2.21389e-11	2.18882e-11
8.2	2.21334e-11	2.18857e-11
8.22	2.21329e-11	2.18899e-11
8.24	2.21336e-11	2.18904e-11
8.26	2.21314e-11	2.18887e-11
8.28	2.21346e-11	2.18867e-11
8.3	2.2136e-11	2.18835e-11
8.32	2.21286e-11	2.18909e-11
8.34	2.21353e-11	2.18868e-11
8.36	2.21302e-11	2.1899e-11
8.38	2.21365e-11	2.1894e-11
8.4	2.21382e-11	2.18903e-11
8.42	2.21384e-11	2.18832e-11
8.44	2.21366e-11	2.18831e-11
8.46	2.2137e-11	2.18884e-11
8.48	2.2135e-11	2.18898e-11
8.5	2.21351e-11	2.18949e-11
8.52	2.21303e-11	2.18903e-11
8.54	2.21302e-11	2.18907e-11
8.56	2.21342e-11	2.18908e-11
8.58	2.21323e-11	2.18846e-11
8.6	2.21353e-11	2.1886e-11
8.62	2.21314e-11	2.18839e-11
8.64	2.21313e-11	2.18915e-11
8.66	2.2124e-11	2.18861e-11
8.68	2.21315e-11	2.18941e-11
8.7	2.21306e-11	2.18853e-11
8.72	2.2128e-11	2.18871e-11
8.74	2.2133e-11	2.18826e-11
8.76	2.21275e-11	2.18811e-11
8.78	2.21301e-11	2.18776e-11
8.8	2.21321e-11	2.18764e-11
8.82	2.21298e-11	2.18816e-11
8.84	2.21326e-11	2.18848e-11
8.86	2.21297e-11	2.18906e-11
8.88	2.21321e-11	2.18921e-11
8.9	2.21314e-11	2.18859e-11
8.92	2.21291e-11	2.18899e-11
8.94	2.21257e-11	2.18787e-11
8.96	2.21338e-11	2.18865e-11
8.98	2.21291e-11	2.18926e-11
9	2.21284e-11	2.18797e-11
9.02	2.21354e-11	2.18777e-11
9.04	2.21304e-11	2.18891e-11
9.06	2.21308e-11	2.18873e-11
9.08	2.21338e-11	2.18895e-11
9.1	2.2138e-11	2.18928e-11
9.12	2.21304e-11	2.18934e-11
9.14	2.21332e-11	2.18902e-11
9.16	2.21334e-11	2.18934e-11
9.18	2.21334e-11	2.18918e-11
9.2	2.21378e-11	2.18888e-11
9.22	2.21323e-11	2.18931e-11
9.24	2.2131e-11	2.18928e-11
9.26	2.21356e-11	2.18853e-11
9.28	2.21307e-11	2.1894e-11
9.3	2.2123e-11	2.18888e-11
9.32	2.21295e-11	2.18911e-11
9.34	2.21333e-11	2.18878e-11
9.36	2.21318e-11	2.18919e-11
9.38	2.21317e-11	2.18875e-11
9.4	2.21327e-11	2.18891e-11
9.42	2.21356e-11	2.18805e-11
9.44	2.21304e-11	2.188e-11
9.46	2.21248e-11	2.18795e-11
9.48	2.2129e-11	2.18898e-11
9.5	2.21271e-11	2.18824e-11
9.52	2.21298e-11	2.18925e-11
9.54	2.21283e-11	2.18906e-11
9.56	2.21297e-11	2.18952e-11
9.58	2.2127e-11	2.18906e-11
9.6	2.21277e-11	2.189e-11
9.62	2.21305e-11	2.189e-11
9.64	2.21283e-11	2.18969e-11
9.66	2.21255e-11	2.18954e-11
9.68	2.21292e-11	2.18991e-11
9.7	2.21314e-11	2.18962e-11
9.72	2.21353e-11	2.1893e-11
9.74	2.21301e-11	2.18935e-11
9.76	2.21242e-11	2.18907e-11
9.78	2.21281e-11	2.1894e-11
9.8	2.21295e-11	2.18934e-11
9.82	2.21291e-11	2.189e-11
9.84	2.21316e-11	2.1903e-11
9.86	2.21277e-11	2.18991e-11
9.88	2.2128e-11	2.18932e-11
9.9	2.21334e-11	2.1897e-11
9.92	2.21297e-11	2.18952e-11
9.94	2.21305e-11	2.18926e-11
9.96	2.21325e-11	2.1897e-11
9.98	2.21286e-11	2.18915e-11
10	2.21286e-11	2.18951e-11
10.02	2.21298e-11	2.18895e-11
10.04	2.21352e-11	2.18952e-11
10.06	2.21285e-11	2.18983e-11
10.08	2.21311e-11	2.1897e-11
10.1	2.21299e-11	2.18974e-11
10.12	2.21308e-11	2.18938e-11
10.14	2.21327e-11	2.18886e-11
10.16	2.21271e-11	2.18908e-11
10.18	2.2132e-11	2.18814e-11
10.2	2.21234e-11	2.18868e-11
10.22	2.21291e-11	2.18904e-11
10.24	2.21244e-11	2.18941e-11
10.26	2.21277e-11	2.18924e-11
10.28	2.21261e-11	2.18915e-11
10.3	2.21323e-11	2.18942e-11
10.32	2.21323e-11	2.18984e-11
10.34	2.21354e-11	2.1892e-11
10.36	2.21346e-11	2.18886e-11
10.38	2.2128e-11	2.18903e-11
10.4	2.21315e-11	2.18881e-11
10.42	2.21335e-11	2.18921e-11
10.44	2.21266e-11	2.18947e-11
10.46	2.21329e-11	2.18865e-11
10.48	2.21254e-11	2.18929e-11
10.5	2.21352e-11	2.18942e-11
10.52	2.21307e-11	2.18892e-11
10.54	2.21297e-11	2.18962e-11
10.56	2.21411e-11	2.18982e-11
10.58	2.21376e-11	2.18924e-11
10.6	2.21289e-11	2.18951e-11
10.62	2.21268e-11	2.18906e-11
10.64	2.213e-11	2.18899e-11
10.66	2.21312e-11	2.18922e-11
10.68	2.21272e-11	2.18923e-11
10.7	2.21311e-11	2.18969e-11
10.72	2.21345e-11	2.18971e-11
10.74	2.21321e-11	2.18937e-11
10.76	2.21289e-11	2.18866e-11
10.78	2.21317e-11	2.18946e-11
10.8	2.21267e-11	2.18952e-11
10.82	2.21335e-11	2.1891e-11
10.84	2.21335e-11	2.18963e-11
10.86	2.21349e-11	2.18957e-11
10.88	2.21321e-11	2.18971e-11
10.9	2.21322e-11	2.19013e-11
10.92	2.21323e-11	2.1891e-11
10.94	2.21329e-11	2.16837e-11
10.96	2.21319e-11	2.15259e-11
10.98	2.21322e-11	2.14964e-11
11	2.21306e-11	2.14986e-11
11.02	2.21323e-11	2.14872e-11
11.04	2.21393e-11	2.15019e-11
11.06	2.21319e-11	2.15086e-11
11.08	2.21286e-11	2.15238e-11
11.1	2.21319e-11	2.15183e-11
11.12	2.21352e-11	2.15267e-11
11.14	2.21351e-11	2.15326e-11
11.16	2.21303e-11	2.15261e-11
11.18	2.21342e-11	2.15266e-11
11.2	2.2134e-11	2.15288e-11
11.22	2.21363e-11	2.15302e-11
11.24	2.21321e-11	2.15368e-11
11.26	2.21333e-11	2.15373e-11
11.28	2.21402e-11	2.15303e-11
11.3	2.21307e-11	2.15319e-11
11.32	2.21318e-11	2.15325e-11
11.34	2.21299e-11	2.15334e-11
11.36	2.21276e-11	2.15311e-11
11.38	2.21275e-11	2.15369e-11
11.4	2.21296e-11	2.15344e-11
11.42	2.21345e-11	2.1537e-11
11.44	2.21281e-11	2.15393e-11
11.46	2.21358e-11	2.15408e-11
11.48	2.2133e-11	2.15361e-11
11.5	2.21325e-11	2.15397e-11
11.52	2.21392e-11	2.15357e-11
11.54	2.21341e-11	2.15387e-11
11.56	2.2136e-11	2.15378e-11
11.58	2.2139e-11	2.15367e-11
11.6	2.21336e-11	2.15368e-11
11.62	2.21346e-11	2.15355e-11
11.64	2.21332e-11	2.15453e-11
11.66	2.21306e-11	2.15468e-11
11.68	2.21369e-11	2.15333e-11
11.7	2.21348e-11	2.1543e-11
11.72	2.21386e-11	2.15384e-11
11.74	2.21341e-11	2.15425e-11
11.76	2.2135e-11	2.15429e-11
11.78	2.21333e-11	2.15435e-11
11.8	2.21374e-11	2.1549e-11
11.82	2.21366e-11	2.15419e-11
11.84	2.21407e-11	2.15507e-11
11.86	2.21403e-11	2.15448e-11
11.88	2.21413e-11	2.15487e-11
11.9	2.2133e-11	2.15447e-11
11.92	2.21377e-11	2.15401e-11
11.94	2.21374e-11	2.15418e-11
11.96	2.21391e-11	2.15464e-11
11.98	2.2139e-11	2.15385e-11
12	2.21343e-11	2.15463e-11
12.02	2.21353e-11	2.15525e-11
12.04	2.21337e-11	2.15489e-11
12.06	2.21305e-11	2.15469e-11
12.08	2.21379e-11	2.15493e-11
12.1	2.21341e-11	2.15463e-11
12.12	2.21276e-11	2.15472e-11
12.14	2.21416e-11	2.1541e-11
12.16	2.21356e-11	2.15516e-11
12.18	2.21396e-11	2.15446e-11
12.2	2.21413e-11	2.15466e-11
12.22	2.21418e-11	2.15495e-11
12.24	2.21372e-11	2.1541e-11
12.26	2.21345e-11	2.15507e-11
12.28	2.21397e-11	2.15537e-11
12.3	2.21395e-11	2.15487e-11
12.32	2.21319e-11	2.15477e-11
12.34	2.21366e-11	2.15494e-11
12.36	2.21348e-11	2.15521e-11
12.38	2.21335e-11	2.15494e-11
12.4	2.21406e-11	2.15528e-11
12.42	2.21393e-11	2.15579e-11
12.44	2.21379e-11	2.15575e-11
12.46	2.21284e-11	2.15532e-11
12.48	2.21309e-11	2.15536e-11
12.5	2.21326e-11	2.15527e-11
12.52	2.21298e-11	2.1549e-11
12.54	2.21284e-11	2.15528e-11
12.56	2.21273e-11	2.15543e-11
12.58	2.213e-11	2.15574e-11
12.6	2.21351e-11	2.15534e-11
12.62	2.21325e-11	2.155e-11
12.64	2.21356e-11	2.15482e-11
12.66	2.21325e-11	2.15462e-11
12.68	2.21316e-11	2.15562e-11
12.7	2.21276e-11	2.15509e-11
12.72	2.21307e-11	2.15557e-11
12.74	2.21274e-11	2.15612e-11
12.76	2.21304e-11	2.1562e-11
12.78	2.2127e-11	2.15556e-11
12.8	2.21352e-11	2.15568e-11
12.82	2.21288e-11	2.15552e-11
12.84	2.21442e-11	2.15557e-11
12.86	2.21357e-11	2.1552e-11
12.88	2.21351e-11	2.15514e-11
12.9	2.21307e-11	2.15586e-11
12.92	2.21248e-11	2.15484e-11
12.94	2.21359e-11	2.15492e-11
12.96	2.21282e-11	2.1557e-11
12.98	2.21417e-11	2.15501e-11
13	2.21269e-11	2.15531e-11
13.02	2.21346e-11	2.15524e-11
13.04	2.21412e-11	2.15534e-11
13.06	2.21382e-11	2.15535e-11
13.08	2.21359e-11	2.15558e-11
13.1	2.21359e-11	2.15588e-11
13.12	2.21306e-11	2.15607e-11
13.14	2.21321e-11	2.15628e-11
13.16	2.21395e-11	2.1558e-11
13.18	2.21303e-11	2.15576e-11
13.2	2.21336e-11	2.15548e-11
13.22	2.2139e-11	2.15615e-11
13.24	2.21355e-11	2.15614e-11
13.26	2.21352e-11	2.15604e-11
13.28	2.21299e-11	2.15605e-11
13.3	2.21305e-11	2.15539e-11
13.32	2.21348e-11	2.1562e-11
13.34	2.21325e-11	2.15544e-11
13.36	2.21345e-11	2.15611e-11
13.38	2.21278e-11	2.15625e-11
13.4	2.21318e-11	2.15592e-11
13.42	2.21304e-11	2.1558e-11
13.44	2.21369e-11	2.15601e-11
13.46	2.21336e-11	2.15617e-11
13.48	2.21337e-11	2.15599e-11
13.5	2.21314e-11	2.15636e-11
13.52	2.21294e-11	2.15593e-11
13.54	2.21335e-11	2.15527e-11
13.56	2.2133e-11	2.15553e-11
13.58	2.21382e-11	2.15582e-11
13.6	2.21352e-11	2.15587e-11
13.62	2.21293e-11	2.15665e-11
13.64	2.21313e-11	2.15561e-11
13.66	2.21347e-11	2.15643e-11
13.68	2.21315e-11	2.15617e-11
13.7	2.21281e-11	2.1563e-11
13.72	2.2127e-11	2.15613e-11
13.74	2.2122e-11	2.15563e-11
13.76	2.21357e-11	2.15566e-11
13.78	2.21301e-11	2.15614e-11
13.8	2.21272e-11	2.15676e-11
13.82	2.21277e-11	2.15679e-11
13.84	2.21376e-11	2.15643e-11
13.86	2.21366e-11	2.15636e-11
13.88	2.21301e-11	2.15589e-11
13.9	2.21328e-11	2.15574e-11
13.92	2.21302e-11	2.15621e-11
13.94	2.21375e-11	2.15688e-11
13.96	2.21308e-11	2.15656e-11
13.98	2.21355e-11	2.15673e-11
14	2.21295e-11	2.15636e-11
14.02	2.21363e-11	2.15581e-11
14.04	2.21364e-11	2.1566e-11
14.06	2.21323e-11	2.15636e-11
14.08	2.21353e-11	2.15655e-11
14.1	2.21441e-11	2.15657e-11
14.12	2.21311e-11	2.15668e-11
14.14	2.21316e-11	2.15656e-11
14.16	2.21356e-11	2.1565e-11
14.18	2.21323e-11	2.1566e-11
14.2	2.21347e-11	2.1571e-11
14.22	2.21337e-11	2.15666e-11
14.24	2.21299e-11	2.15662e-11
14.26	2.21294e-11	2.15699e-11
14.28	2.21264e-11	2.15634e-11
14.3	2.2129e-11	2.1565e-11
14.32	2.21342e-11	2.15695e-11
14.34	2.21279e-11	2.15728e-11
14.36	2.21264e-11	2.15672e-11
14.38	2.2133e-11	2.15658e-11
14.4	2.21308e-11	2.15601e-11
14.42	2.21379e-11	2.15672e-11
14.44	2.21363e-11	2.15658e-11
14.46	2.21314e-11	2.15687e-11
14.48	2.2129e-11	2.15637e-11
14.5	2.21338e-11	2.15665e-11
14.52	2.21341e-11	2.1562e-11
14.54	2.21326e-11	2.15664e-11
14.56	2.21316e-11	2.15661e-11
14.58	2.21328e-11	2.15622e-11
14.6	2.21275e-11	2.15693e-11
14.62	2.2126e-11	2.15732e-11
14.64	2.21336e-11	2.15655e-11
14.66	2.21313e-11	2.15691e-11
14.68	2.21348e-11	2.15583e-11
14.7	2.21282e-11	2.15568e-11
14.72	2.21304e-11	2.15704e-11
14.74	2.21344e-11	2.15656e-11
14.76	2.21323e-11	2.15697e-11
14.78	2.2131e-11	2.1566e-11
14.8	2.21326e-11	2.15678e-11
14.82	2.21271e-11	2.15713e-11
14.84	2.21302e-11	2.15715e-11
14.86	2.21307e-11	2.1565e-11
14.88	2.21302e-11	2.15668e-11
14.9	2.21306e-11	2.15701e-11
14.92	2.21284e-11	2.15706e-11
14.94	2.21309e-11	2.15684e-11
14.96	2.21259e-11	2.15566e-11
14.98	2.21276e-11	2.15712e-11
15	2.21301e-11	2.15696e-11
15.02	2.21353e-11	2.15729e-11
15.04	2.21303e-11	2.15672e-11
15.06	2.21329e-11	2.15632e-11
15.08	2.2129e-11	2.15619e-11
15.1	2.21349e-11	2.15652e-11
15.12	2.21283e-11	2.15732e-11
15.14	2.21256e-11	2.15596e-11
15.16	2.21299e-11	2.15628e-11
15.18	2.21292e-11	2.15697e-11
15.2	2.21332e-11	2.15701e-11
15.22	2.21319e-11	2.15739e-11
15.24	2.21344e-11	2.15706e-11
15.26	2.21307e-11	2.15723e-11
15.28	2.21318e-11	2.15691e-11
15.3	2.2132e-11	2.15707e-11
15.32	2.21257e-11	2.15702e-11
15.34	2.21287e-11	2.15701e-11
15.36	2.21306e-11	2.15721e-11
15.38	2.21264e-11	2.15707e-11
15.4	2.21267e-11	2.15664e-11
15.42	2.21314e-11	2.15702e-11
15.44	2.21319e-11	2.15643e-11
15.46	2.21323e-11	2.1563e-11
15.48	2.21322e-11	2.15694e-11
15.5	2.21335e-11	2.15647e-11
15.52	2.21352e-11	2.15706e-11
15.54	2.2134e-11	2.15723e-11
15.56	2.21349e-11	2.15732e-11
15.58	2.21232e-11	2.15717e-11
15.6	2.21263e-11	2.15653e-11
15.62	2.21277e-11	2.15698e-11
15.64	2.21342e-11	2.15797e-11
15.66	2.21313e-11	2.15721e-11
15.68	2.21235e-11	2.15701e-11
15.7	2.21314e-11	2.15714e-11
15.72	2.21288e-11	2.15717e-11
15.74	2.21267e-11	2.15679e-11
15.76	2.21284e-11	2.15721e-11
15.78	2.21344e-11	2.1569e-11
15.8	2.21266e-11	2.15726e-11
15.82	2.21318e-11	2.15777e-11
15.84	2.21209e-11	2.15716e-11
15.86	2.21308e-11	2.15741e-11
15.88	2.21302e-11	2.15714e-11
15.9	2.21339e-11	2.15731e-11
15.92	2.21289e-11	2.15775e-11
15.94	2.21321e-11	2.15674e-11
15.96	2.21307e-11	2.15686e-11
15.98	2.2135e-11	2.15756e-11
16	2.21312e-11	2.15769e-11
16.02	2.21377e-11	2.15729e-11
16.04	2.21294e-11	2.15706e-11
16.06	2.21334e-11	2.15661e-11
16.08	2.21313e-11	2.15761e-11
16.1	2.21327e-11	2.15742e-11
16.12	2.21368e-11	2.15685e-11
16.14	2.21265e-11	2.15767e-11
16.16	2.21336e-11	2.15766e-11
16.18	2.21339e-11	2.15722e-11
16.2	2.21359e-11	2.15788e-11
16.22	2.21352e-11	2.15741e-11
16.24	2.21382e-11	2.15706e-11
16.26	2.21383e-11	2.15687e-11
16.28	2.21339e-11	2.15701e-11
16.3	2.21297e-11	2.15803e-11
16.32	2.21395e-11	2.15678e-11
16.34	2.21357e-11	2.15778e-11
16.36	2.2134e-11	2.15786e-11
16.38	2.21323e-11	2.15726e-11
16.4	2.21305e-11	2.15811e-11
16.42	2.21318e-11	2.15759e-11
16.44	2.21373e-11	2.15753e-11
16.46	2.21291e-11	2.15826e-11
16.48	2.21363e-11	2.1574e-11
16.5	2.21256e-11	2.15788e-11
16.52	2.21299e-11	2.1579e-11
16.54	2.2131e-11	2.15826e-11
16.56	2.21329e-11	2.15816e-11
16.58	2.21293e-11	2.15704e-11
16.6	2.21334e-11	2.15773e-11
16.62	2.21339e-11	2.15775e-11
16.64	2.21272e-11	2.15784e-11
16.66	2.21326e-11	2.15772e-11
16.68	2.21362e-11	2.15813e-11
16.7	2.21337e-11	2.15799e-11
16.72	2.21262e-11	2.15771e-11
16.74	2.21297e-11	2.15816e-11
16.76	2.21336e-11	2.15799e-11
16.78	2.21334e-11	2.15752e-11
16.8	2.21317e-11	2.15785e-11
16.82	2.21282e-11	2.15825e-11
16.84	2.21361e-11	2.15824e-11
16.86	2.21246e-11	2.15804e-11
16.88	2.21356e-11	2.15853e-11
16.9	2.21298e-11	2.15807e-11
16.92	2.21368e-11	2.15792e-11
16.94	2.21293e-11	2.1576e-11
16.96	2.21291e-11	2.15726e-11
16.98	2.21269e-11	2.15746e-11
17	2.2138e-11	2.15727e-11
17.02	2.21513e-11	2.15768e-11
17.04	2.21365e-11	2.15813e-11
17.06	2.21328e-11	2.15795e-11
17.08	2.18402e-11	2.15682e-11
17.1	2.1655e-11	2.15746e-11
17.12	2.16593e-11	2.15799e-11
17.14	2.16574e-11	2.15766e-11
17.16	2.1659e-11	2.15697e-11
17.18	2.16624e-11	2.15699e-11
17.2	2.16723e-11	2.15689e-11
17.22	2.16831e-11	2.15732e-11
17.24	2.16878e-11	2.15741e-11
17.26	2.16869e-11	2.1573e-11
17.28	2.16936e-11	2.15742e-11
17.3	2.16831e-11	2.15763e-11
17.32	2.16912e-11	2.15717e-11
17.34	2.16899e-11	2.15739e-11
17.36	2.16949e-11	2.15707e-11
17.38	2.16912e-11	2.15747e-11
17.4	2.16919e-11	2.1575e-11
17.42	2.16924e-11	2.15779e-11
17.44	2.16837e-11	2.15736e-11
17.46	2.16847e-11	2.15739e-11
17.48	2.16768e-11	2.15754e-11
17.5	2.16831e-11	2.15707e-11
17.52	2.16825e-11	2.15766e-11
17.54	2.16821e-11	2.15736e-11
17.56	2.16884e-11	2.1562e-11
17.58	2.1685e-11	2.15704e-11
17.6	2.16886e-11	2.15751e-11
17.62	2.16754e-11	2.15713e-11
17.64	2.16889e-11	2.15696e-11
17.66	2.16964e-11	2.15658e-11
17.68	2.16936e-11	2.15779e-11
17.7	2.16821e-11	2.15728e-11
17.72	2.16846e-11	2.15732e-11
17.74	2.16891e-11	2.15683e-11
17.76	2.16913e-11	2.15661e-11
17.78	2.16901e-11	2.15567e-11
17.8	2.1694e-11	2.15727e-11
17.82	2.16934e-11	2.15749e-11
17.84	2.16915e-11	2.15746e-11
17.86	2.16852e-11	2.15729e-11
17.88	2.16956e-11	2.15738e-11
17.9	2.16892e-11	2.15763e-11
17.92	2.16923e-11	2.15782e-11
17.94	2.16874e-11	2.15732e-11
17.96	2.16888e-11	2.1577e-11
17.98	2.16885e-11	2.15761e-11
18	2.16911e-11	2.15714e-11
18.02	2.16942e-11	2.15735e-11
18.04	2.16907e-11	2.15787e-11
18.06	2.16906e-11	2.15794e-11
18.08	2.16884e-11	2.15691e-11
18.1	2.16874e-11	2.15739e-11
18.12	2.16882e-11	2.15748e-11
18.14	2.16931e-11	2.15818e-11
18.16	2.16888e-11	2.15752e-11
18.18	2.16901e-11	2.15674e-11
18.2	2.16979e-11	2.15778e-11
18.22	2.16998e-11	2.15752e-11
18.24	2.1694e-11	2.15792e-11
18.26	2.16938e-11	2.15763e-11
18.28	2.1694e-11	2.15758e-11
18.3	2.16907e-11	2.15796e-11
18.32	2.16932e-11	2.1567e-11
18.34	2.16957e-11	2.1576e-11
18.36	2.16986e-11	2.15791e-11
18.38	2.1693e-11	2.15658e-11
18.4	2.16884e-11	2.15755e-11
18.42	2.16936e-11	2.15747e-11
18.44	2.16842e-11	2.15754e-11
18.46	2.16908e-11	2.15724e-11
18.48	2.16989e-11	2.15767e-11
18.5	2.16978e-11	2.15704e-11
18.52	2.16933e-11	2.15698e-11
18.54	2.1697e-11	2.15746e-11
18.56	2.16913e-11	2.15683e-11
18.58	2.16922e-11	2.15815e-11
18.6	2.16915e-11	2.15743e-11
18.62	2.16926e-11	2.1572e-11
18.64	2.16924e-11	2.15756e-11
18.66	2.16937e-11	2.1581e-11
18.68	2.16943e-11	2.15819e-11
18.7	2.17003e-11	2.15778e-11
18.72	2.16948e-11	2.15768e-11
18.74	2.17055e-11	2.15802e-11
18.76	2.1703e-11	2.15829e-11
18.78	2.16963e-11	2.15795e-11
18.8	2.16909e-11	2.15772e-11
18.82	2.16943e-11	2.15761e-11
18.84	2.1696e-11	2.15735e-11
18.86	2.16946e-11	2.15765e-11
18.88	2.16981e-11	2.15717e-11
18.9	2.16951e-11	2.15739e-11
18.92	2.1693e-11	2.15756e-11
18.94	2.16917e-11	2.15799e-11
18.96	2.17011e-11	2.15768e-11
18.98	2.16982e-11	2.15715e-11
19	2.16933e-11	2.15783e-11
19.02	2.16932e-11	2.15861e-11
19.04	2.16884e-11	2.15736e-11
19.06	2.16995e-11	2.15819e-11
19.08	2.16946e-11	2.15701e-11
19.1	2.16961e-11	2.15735e-11
19.12	2.1693e-11	2.15763e-11
19.14	2.17019e-11	2.1579e-11
19.16	2.17003e-11	2.15704e-11
19.18	2.17013e-11	2.15805e-11
19.2	2.17007e-11	2.15708e-11
19.22	2.17013e-11	2.15725e-11
19.24	2.17027e-11	2.15699e-11
19.26	2.17048e-11	2.15736e-11
19.28	2.17004e-11	2.15735e-11
19.3	2.17064e-11	2.15826e-11
19.32	2.16976e-11	2.15893e-11
19.34	2.17029e-11	2.15874e-11
19.36	2.17072e-11	2.15735e-11
19.38	2.17023e-11	2.15786e-11
19.4	2.17085e-11	2.15732e-11
19.42	2.16947e-11	2.15733e-11
19.44	2.17028e-11	2.15774e-11
19.46	2.16983e-11	2.15746e-11
19.48	2.16903e-11	2.15771e-11
19.5	2.16951e-11	2.15718e-11
19.52	2.16986e-11	2.1574e-11
19.54	2.1705e-11	2.15845e-11
19.56	2.16938e-11	2.15782e-11
19.58	2.17038e-11	2.15741e-11
19.6	2.16978e-11	2.15768e-11
19.62	2.17031e-11	2.15722e-11
19.64	2.17037e-11	2.15812e-11
19.66	2.17028e-11	2.15749e-11
19.68	2.17015e-11	2.158e-11
19.7	2.17027e-11	2.15863e-11
19.72	2.17036e-11	2.15902e-11
19.74	2.16981e-11	2.15812e-11
19.76	2.1696e-11	2.15851e-11
19.78	2.17046e-11	2.15793e-11
19.8	2.16962e-11	2.1585e-11
19.82	2.17032e-11	2.15807e-11
19.84	2.17041e-11	2.15808e-11
19.86	2.16995e-11	2.15755e-11
19.88	2.17004e-11	2.15734e-11
19.9	2.1703e-11	2.15782e-11
19.92	2.17052e-11	2.15885e-11
19.94	2.17016e-11	2.15855e-11
19.96	2.16967e-11	2.15874e-11
19.98	2.17003e-11	2.15849e-11
20	2.17042e-11	2.15852e-11
20.02	2.17042e-11	2.15809e-11
20.04	2.1697e-11	2.1581e-11
20.06	2.17078e-11	2.15753e-11
20.08	2.16978e-11	2.15809e-11
20.1	2.17011e-11	2.15813e-11
20.12	2.17006e-11	2.15826e-11
20.14	2.17037e-11	2.15824e-11
20.16	2.17049e-11	2.15825e-11
20.18	2.16991e-11	2.15888e-11
20.2	2.17001e-11	2.15846e-11
20.22	2.17038e-11	2.1586e-11
20.24	2.16985e-11	2.15819e-11
20.26	2.17029e-11	2.15861e-11
20.28	2.17009e-11	2.15855e-11
20.3	2.16969e-11	2.1584e-11
20.32	2.16979e-11	2.15858e-11
20.34	2.16965e-11	2.15873e-11
20.36	2.17028e-11	2.15921e-11
20.38	2.17005e-11	2.15896e-11
20.4	2.16966e-11	2.15842e-11
20.42	2.16998e-11	2.158e-11
20.44	2.17039e-11	2.15864e-11
20.46	2.17002e-11	2.15886e-11
20.48	2.16974e-11	2.15881e-11
20.5	2.17047e-11	2.15872e-11
20.52	2.16981e-11	2.15885e-11
20.54	2.16938e-11	2.15888e-11
20.56	2.16996e-11	2.15878e-11
20.58	2.16987e-11	2.15864e-11
20.6	2.17045e-11	2.15884e-11
20.62	2.17032e-11	2.159e-11
20.64	2.16933e-11	2.15903e-11
20.66	2.16947e-11	2.15857e-11
20.68	2.17007e-11	2.15865e-11
20.7	2.16976e-11	2.15839e-11
20.72	2.17039e-11	2.1579e-11
20.74	2.16961e-11	2.15812e-11
20.76	2.16961e-11	2.15833e-11
20.78	2.16961e-11	2.15881e-11
20.8	2.17039e-11	2.15884e-11
20.82	2.17027e-11	2.15917e-11
20.84	2.1702e-11	2.15927e-11
20.86	2.1696e-11	2.15907e-11
20.88	2.17106e-11	2.15879e-11
20.9	2.17013e-11	2.15877e-11
20.92	2.16988e-11	2.15899e-11
20.94	2.17034e-11	2.15904e-11
20.96	2.1706e-11	2.15887e-11
20.98	2.17079e-11	2.1585e-11
21	2.1702e-11	2.15817e-11
21.02	2.16992e-11	2.15881e-11
21.04	2.16976e-11	2.1594e-11
21.06	2.17037e-11	2.15884e-11
21.08	2.1704e-11	2.15827e-11
21.1	2.16976e-11	2.15835e-11
21.12	2.17056e-11	2.15903e-11
21.14	2.16907e-11	2.15821e-11
21.16	2.17023e-11	2.15898e-11
21.18	2.17076e-11	2.15895e-11
21.2	2.16991e-11	2.15931e-11
21.22	2.17069e-11	2.15815e-11
21.24	2.16937e-11	2.15855e-11
21.26	2.17022e-11	2.15781e-11
21.28	2.17062e-11	2.15828e-11
21.3	2.1708e-11	2.15895e-11
21.32	2.17037e-11	2.15822e-11
21.34	2.17037e-11	2.15798e-11
21.36	2.17126e-11	2.15797e-11
21.38	2.17053e-11	2.15876e-11
21.4	2.17001e-11	2.15878e-11
21.42	2.1694e-11	2.15813e-11
21.44	2.17008e-11	2.15903e-11
21.46	2.17057e-11	2.15855e-11
21.48	2.16992e-11	2.15856e-11
21.5	2.1701e-11	2.15845e-11
21.52	2.16936e-11	2.15807e-11
21.54	2.1708e-11	2.15827e-11
21.56	2.17018e-11	2.15882e-11
21.58	2.17008e-11	2.15852e-11
21.6	2.16977e-11	2.15821e-11
21.62	2.17065e-11	2.15845e-11
21.64	2.17085e-11	2.15906e-11
21.66	2.17074e-11	2.15857e-11
21.68	2.16929e-11	2.158e-11
21.7	2.16962e-11	2.15909e-11
21.72	2.1704e-11	2.15837e-11
21.74	2.17083e-11	2.15939e-11
21.76	2.17044e-11	2.15821e-11
21.78	2.17011e-11	2.15889e-11
21.8	2.17016e-11	2.15825e-11
21.82	2.17023e-11	2.15817e-11
21.84	2.1704e-11	2.15887e-11
21.86	2.17027e-11	2.15813e-11
21.88	2.17052e-11	2.15876e-11
21.9	2.17075e-11	2.15871e-11
21.92	2.17037e-11	2.15865e-11
21.94	2.17062e-11	2.15911e-11
21.96	2.17108e-11	2.15856e-11
21.98	2.17129e-11	2.15862e-11
22	2.17055e-11	2.15883e-11
22.02	2.16997e-11	2.15876e-11
22.04	2.17086e-11	2.1584e-11
22.06	2.17069e-11	2.15859e-11
22.08	2.17015e-11	2.15857e-11
22.1	2.17024e-11	2.15838e-11
22.12	2.16992e-11	2.15823e-11
22.14	2.17066e-11	2.15912e-11
22.16	2.17083e-11	2.15864e-11
22.18	2.17104e-11	2.15829e-11
22.2	2.17135e-11	2.15848e-11
22.22	2.17122e-11	2.159e-11
22.24	2.17065e-11	2.15862e-11
22.26	2.17043e-11	2.15804e-11
22.28	2.17089e-11	2.15879e-11
22.3	2.1713e-11	2.15952e-11
22.32	2.17102e-11	2.15854e-11
22.34	2.17122e-11	2.15909e-11
22.36	2.17174e-11	2.15908e-11
22.38	2.17145e-11	2.15925e-11
22.4	2.17134e-11	2.15897e-11
22.42	2.17162e-11	2.15932e-11
22.44	2.17137e-11	2.15925e-11
22.46	2.17111e-11	2.15918e-11
22.48	2.17083e-11	2.15981e-11
22.5	2.17119e-11	2.15887e-11
22.52	2.1718e-11	2.15884e-11
22.54	2.17119e-11	2.15872e-11
22.56	2.17155e-11	2.15909e-11
22.58	2.17216e-11	2.1588e-11
22.6	2.17137e-11	2.15843e-11
22.62	2.17174e-11	2.15845e-11
22.64	2.17162e-11	2.15912e-11
22.66	2.17161e-11	2.15881e-11
22.68	2.17182e-11	2.15892e-11
22.7	2.17177e-11	2.15956e-11
22.72	2.17229e-11	2.159e-11
22.74	2.17147e-11	2.15917e-11
22.76	2.17236e-11	2.15983e-11
22.78	2.17158e-11	2.15844e-11
22.8	2.17165e-11	2.15851e-11
22.82	2.17207e-11	2.15903e-11
22.84	2.17209e-11	2.15921e-11
22.86	2.17215e-11	2.15902e-11
22.88	2.17234e-11	2.15983e-11
22.9	2.17218e-11	2.15963e-11
22.92	2.17284e-11	2.15919e-11
22.94	2.17216e-11	2.15976e-11
22.96	2.17209e-11	2.15933e-11
22.98	2.17175e-11	2.15881e-11
23	2.17166e-11	2.1592e-11
23.02	2.17198e-11	2.15914e-11
23.04	2.172e-11	2.15925e-11
23.06	2.17128e-11	2.15914e-11
23.08	2.17201e-11	2.15964e-11
23.1	2.1715e-11	2.15959e-11
23.12	2.17169e-11	2.15947e-11
23.14	2.17216e-11	2.15942e-11
23.16	2.17293e-11	2.15993e-11
23.18	2.17275e-11	2.15911e-11
23.2	2.17276e-11	2.15926e-11
23.22	2.17149e-11	2.15898e-11
23.24	2.17273e-11	2.15896e-11
23.26	2.17199e-11	2.1597e-11
23.28	2.17177e-11	2.1593e-11
23.3	2.17245e-11	2.15882e-11
23.32	2.17224e-11	2.15909e-11
23.34	2.17197e-11	2.1599e-11
23.36	2.17257e-11	2.1592e-11
23.38	2.17261e-11	2.15973e-11
23.4	2.1728e-11	2.15963e-11
23.42	2.17252e-11	2.15912e-11
23.44	2.17278e-11	2.15946e-11
23.46	2.17241e-11	2.15933e-11
23.48	2.17223e-11	2.15936e-11
23.5	2.17246e-11	2.15918e-11
23.52	2.17215e-11	2.15891e-11
23.54	2.17186e-11	2.16009e-11
23.56	2.17255e-11	2.15967e-11
23.58	2.17178e-11	2.15946e-11
23.6	2.17306e-11	2.15965e-11
23.62	2.17239e-11	2.15978e-11
23.64	2.17272e-11	2.15859e-11
23.66	2.17323e-11	2.15902e-11
23.68	2.17289e-11	2.15955e-11
23.7	2.1721e-11	2.15876e-11
23.72	2.17256e-11	2.15936e-11
23.74	2.17218e-11	2.15906e-11
23.76	2.17273e-11	2.15958e-11
23.78	2.17286e-11	2.15943e-11
23.8	2.17251e-11	2.15937e-11
23.82	2.17237e-11	2.15931e-11
23.84	2.17223e-11	2.15975e-11
23.86	2.17207e-11	2.15969e-11
23.88	2.17251e-11	2.15921e-11
23.9	2.17289e-11	2.15957e-11
23.92	2.17266e-11	2.15914e-11
23.94	2.17279e-11	2.15957e-11
23.96	2.17215e-11	2.15944e-11
23.98	2.17219e-11	2.15886e-11
24	2.17229e-11	2.15946e-11
24.02	2.17266e-11	2.15952e-11
24.04	2.17306e-11	2.15963e-11
24.06	2.17306e-11	2.15941e-11
24.08	2.17362e-11	2.15954e-11
24.1	2.17322e-11	2.1598e-11
24.12	2.17251e-11	2.16036e-11
24.14	2.17195e-11	2.15939e-11
24.16	2.17232e-11	2.15951e-11
24.18	2.1719e-11	2.16002e-11
24.2	2.17188e-11	2.15995e-11
24.22	2.17261e-11	2.15971e-11
24.24	2.17204e-11	2.15958e-11
24.26	2.17133e-11	2.16034e-11
24.28	2.17151e-11	2.15966e-11
24.3	2.17207e-11	2.15996e-11
24.32	2.17195e-11	2.16062e-11
24.34	2.17239e-11	2.15979e-11
24.36	2.17288e-11	2.16002e-11
24.38	2.17265e-11	2.16037e-11
24.4	2.17282e-11	2.16009e-11
24.42	2.17235e-11	2.15945e-11
24.44	2.1728e-11	2.1598e-11
24.46	2.17216e-11	2.15973e-11
24.48	2.17218e-11	2.15986e-11
24.5	2.17129e-11	2.15996e-11
24.52	2.17146e-11	2.15975e-11
24.54	2.17167e-11	2.15993e-11
24.56	2.17234e-11	2.16023e-11
24.58	2.17262e-11	2.15885e-11
24.6	2.17292e-11	2.15985e-11
24.62	2.17307e-11	2.16039e-11
24.64	2.17261e-11	2.16005e-11
24.66	2.1731e-11	2.15971e-11
24.68	2.17253e-11	2.15974e-11
24.7	2.17316e-11	2.16063e-11
24.72	2.17218e-11	2.16013e-11
24.74	2.17234e-11	2.16037e-11
24.76	2.17317e-11	2.16024e-11
24.78	2.17258e-11	2.15992e-11
24.8	2.17294e-11	2.15968e-11
24.82	2.17258e-11	2.15966e-11
24.84	2.17252e-11	2.15959e-11
24.86	2.17272e-11	2.15974e-11
24.88	2.17264e-11	2.16005e-11
24.9	2.17274e-11	2.1604e-11
24.92	2.17297e-11	2.16058e-11
24.94	2.17213e-11	2.1596e-11
24.96	2.1728e-11	2.15965e-11
24.98	2.17257e-11	2.15995e-11
25	2.17205e-11	2.15965e-11
25.02	2.17355e-11	2.16011e-11
25.04	2.17187e-11	2.15975e-11
25.06	2.17229e-11	2.16036e-11
25.08	2.1728e-11	2.1605e-11
25.1	2.17237e-11	2.15987e-11
25.12	2.17292e-11	2.16001e-11
25.14	2.17261e-11	2.15995e-11
25.16	2.17323e-11	2.15955e-11
25.18	2.17259e-11	2.15985e-11
25.2	2.17276e-11	2.15994e-11
25.22	2.17225e-11	2.16025e-11
25.24	2.17304e-11	2.16005e-11
25.26	2.17228e-11	2.1602e-11
25.28	2.173e-11	2.16034e-11
25.3	2.17295e-11	2.16009e-11
25.32	2.17243e-11	2.15948e-11
25.34	2.17261e-11	2.15948e-11
25.36	2.17345e-11	2.16024e-11
25.38	2.17291e-11	2.16025e-11
25.4	2.17279e-11	2.16032e-11
25.42	2.17266e-11	2.15958e-11
25.44	2.17348e-11	2.15947e-11
25.46	2.17312e-11	2.15958e-11
25.48	2.17281e-11	2.16036e-11
25.5	2.17319e-11	2.15967e-11
25.52	2.17354e-11	2.16008e-11
25.54	2.17293e-11	2.15983e-11
25.56	2.17244e-11	2.16032e-11
25.58	2.17183e-11	2.15985e-11
25.6	2.17233e-11	2.15987e-11
25.62	2.17229e-11	2.1604e-11
25.64	2.17252e-11	2.15989e-11
25.66	2.17252e-11	2.16021e-11
25.68	2.17198e-11	2.15964e-11
25.7	2.17213e-11	2.16049e-11
25.72	2.17243e-11	2.15997e-11
25.74	2.17095e-11	2.15985e-11
25.76	2.17133e-11	2.15967e-11
25.78	2.17206e-11	2.1602e-11
25.8	2.17197e-11	2.15985e-11
25.82	2.17306e-11	2.15961e-11
25.84	2.17216e-11	2.16002e-11
25.86	2.17238e-11	2.16115e-11
25.88	2.17202e-11	2.15996e-11
25.9	2.17109e-11	2.1597e-11
25.92	2.17232e-11	2.16028e-11
25.94	2.17198e-11	2.16033e-11
25.96	2.17258e-11	2.16025e-11
25.98	2.17152e-11	2.15956e-11
26	2.17103e-11	2.15964e-11
26.02	2.17125e-11	2.15974e-11
26.04	2.17164e-11	2.15957e-11
26.06	2.17129e-11	2.16008e-11
26.08	2.17193e-11	2.16019e-11
26.1	2.17171e-11	2.16009e-11
26.12	2.17146e-11	2.16004e-11
26.14	2.17115e-11	2.16016e-11
26.16	2.17196e-11	2.15976e-11
26.18	2.17179e-11	2.16006e-11
26.2	2.17138e-11	2.15965e-11
26.22	2.17185e-11	2.15941e-11
26.24	2.17185e-11	2.16028e-11
26.26	2.1716e-11	2.15968e-11
26.28	2.1723e-11	2.15952e-11
26.3	2.17177e-11	2.15942e-11
26.32	2.17148e-11	2.16042e-11
26.34	2.17141e-11	2.15957e-11
26.36	2.17164e-11	2.16015e-11
26.38	2.17133e-11	2.16039e-11
26.4	2.17144e-11	2.15985e-11
26.42	2.17148e-11	2.15963e-11
26.44	2.17168e-11	2.15937e-11
26.46	2.17149e-11	2.16013e-11
26.48	2.17117e-11	2.15958e-11
26.5	2.17192e-11	2.15946e-11
26.52	2.17153e-11	2.15938e-11
26.54	2.17202e-11	2.16022e-11
26.56	2.17199e-11	2.15968e-11
26.58	2.1715e-11	2.15944e-11
26.6	2.17211e-11	2.15949e-11
26.62	2.17195e-11	2.16016e-11
26.64	2.17165e-11	2.15985e-11
26.66	2.17162e-11	2.15962e-11
26.68	2.17224e-11	2.15975e-11
26.7	2.17191e-11	2.16026e-11
26.72	2.17145e-11	2.15958e-11
26.74	2.17192e-11	2.15948e-11
26.76	2.17103e-11	2.15982e-11
26.78	2.17179e-11	2.15959e-11
26.8	2.17113e-11	2.16036e-11
26.82	2.17182e-11	2.15903e-11
26.84	2.17165e-11	2.16024e-11
26.86	2.17132e-11	2.15902e-11
26.88	2.17192e-11	2.15996e-11
26.9	2.17164e-11	2.15954e-11
26.92	2.1725e-11	2.15949e-11
26.94	2.17178e-11	2.15916e-11
26.96	2.17185e-11	2.1596e-11
26.98	2.1716e-11	2.15873e-11
27	2.1718e-11	2.15936e-11
27.02	2.17132e-11	2.15965e-11
27.04	2.17152e-11	2.15972e-11
27.06	2.1715e-11	2.15955e-11
27.08	2.17099e-11	2.16003e-11
27.1	2.17094e-11	2.15924e-11
27.12	2.17123e-11	2.15972e-11
27.14	2.17111e-11	2.15998e-11
27.16	2.17158e-11	2.15912e-11
27.18	2.17111e-11	2.16023e-11
27.2	2.1719e-11	2.15991e-11
27.22	2.17178e-11	2.1592e-11
27.24	2.17205e-11	2.1601e-11
27.26	2.17186e-11	2.15982e-11
27.28	2.17136e-11	2.16014e-11
27.3	2.17127e-11	2.15987e-11
27.32	2.17239e-11	2.15902e-11
27.34	2.17135e-11	2.15915e-11
27.36	2.1714e-11	2.15983e-11
27.38	2.17121e-11	2.15908e-11
27.4	2.17101e-11	2.15962e-11
27.42	2.17108e-11	2.15875e-11
27.44	2.17138e-11	2.15845e-11
27.46	2.17122e-11	2.15871e-11
27.48	2.17198e-11	2.1588e-11
27.5	2.17101e-11	2.15886e-11
27.52	2.17172e-11	2.1596e-11
27.54	2.17092e-11	2.15937e-11
27.56	2.17214e-11	2.15852e-11
27.58	2.17161e-11	2.15872e-11
27.6	2.17085e-11	2.15975e-11
27.62	2.17137e-11	2.15845e-11
27.64	2.17187e-11	2.15967e-11
27.66	2.17146e-11	2.15884e-11
27.68	2.17213e-11	2.15922e-11
27.7	2.17261e-11	2.15991e-11
27.72	2.17207e-11	2.15985e-11
27.74	2.17174e-11	2.15972e-11
27.76	2.17151e-11	2.15976e-11
27.78	2.17199e-11	2.15956e-11
27.8	2.17196e-11	2.15932e-11
27.82	2.17319e-11	2.15881e-11
27.84	2.17193e-11	2.15904e-11
27.86	2.17234e-11	2.159e-11
27.88	2.17195e-11	2.15882e-11
27.9	2.17185e-11	2.15885e-11
27.92	2.17181e-11	2.15912e-11
27.94	2.17178e-11	2.15963e-11
27.96	2.17171e-11	2.15912e-11
27.98	2.17197e-11	2.15924e-11
28	2.1719e-11	2.15935e-11
28.02	2.17148e-11	2.15898e-11
28.04	2.17206e-11	2.15865e-11
28.06	2.17237e-11	2.15883e-11
28.08	2.17188e-11	2.15936e-11
28.1	2.17191e-11	2.15879e-11
28.12	2.17244e-11	2.15982e-11
28.14	2.17234e-11	2.15939e-11
28.16	2.17231e-11	2.1582e-11
28.18	2.17172e-11	2.15763e-11
28.2	2.1719e-11	2.15905e-11
28.22	2.17195e-11	2.15865e-11
28.24	2.17244e-11	2.15858e-11
28.26	2.17203e-11	2.1587e-11
28.28	2.17184e-11	2.15926e-11
28.3	2.17259e-11	2.15829e-11
28.32	2.172e-11	2.15863e-11
28.34	2.1715e-11	2.15922e-11
28.36	2.17166e-11	2.15942e-11
28.38	2.17103e-11	2.15889e-11
28.4	2.17181e-11	2.15919e-11
28.42	2.17216e-11	2.1586e-11
28.44	2.17171e-11	2.15875e-11
28.46	2.17171e-11	2.15926e-11
28.48	2.17164e-11	2.15931e-11
28.5	2.17151e-11	2.15945e-11
28.52	2.17197e-11	2.1591e-11
28.54	2.17204e-11	2.1589e-11
28.56	2.17266e-11	2.15868e-11
28.58	2.17223e-11	2.15911e-11
28.6	2.17266e-11	2.15825e-11
28.62	2.17206e-11	2.15857e-11
28.64	2.17195e-11	2.15901e-11
28.66	2.17192e-11	2.15905e-11
28.68	2.1723e-11	2.15965e-11
28.7	2.17215e-11	2.15939e-11
28.72	2.17203e-11	2.15867e-11
28.74	2.17229e-11	2.15806e-11
28.76	2.17197e-11	2.15866e-11
28.78	2.17225e-11	2.15823e-11
28.8	2.17174e-11	2.15871e-11
28.82	2.17199e-11	2.15853e-11
28.84	2.17258e-11	2.15851e-11
28.86	2.17275e-11	2.15858e-11
28.88	2.1714e-11	2.15851e-11
28.9	2.17236e-11	2.15825e-11
28.92	2.172e-11	2.15956e-11
28.94	2.17202e-11	2.15815e-11
28.96	2.17204e-11	2.15824e-11
28.98	2.1724e-11	2.15975e-11
29	2.17196e-11	2.15874e-11
29.02	2.17191e-11	2.15952e-11
29.04	2.17138e-11	2.15958e-11
29.06	2.17176e-11	2.15853e-11
29.08	2.17191e-11	2.1591e-11
29.1	2.17154e-11	2.15912e-11
29.12	2.17177e-11	2.15906e-11
29.14	2.17189e-11	2.15829e-11
29.16	2.17216e-11	2.1585e-11
29.18	2.17142e-11	2.15861e-11
29.2	2.17203e-11	2.15896e-11
29.22	2.17203e-11	2.15997e-11
29.24	2.17196e-11	2.15874e-11
29.26	2.17126e-11	2.15929e-11
29.28	2.17224e-11	2.15878e-11
29.3	2.17107e-11	2.15877e-11
29.32	2.172e-11	2.15912e-11
29.34	2.17228e-11	2.1589e-11
29.36	2.17234e-11	2.15857e-11
29.38	2.1721e-11	2.15913e-11
29.4	2.17182e-11	2.15864e-11
29.42	2.17076e-11	2.15924e-11
29.44	2.17134e-11	2.15905e-11
29.46	2.17208e-11	2.15886e-11
29.48	2.17196e-11	2.15934e-11
29.5	2.17228e-11	2.15859e-11
29.52	2.17191e-11	2.15907e-11
29.54	2.17231e-11	2.15839e-11
29.56	2.17243e-11	2.15866e-11
29.58	2.17191e-11	2.15844e-11
29.6	2.17185e-11	2.15842e-11
29.62	2.17137e-11	2.15913e-11
29.64	2.1712e-11	2.15879e-11
29.66	2.17138e-11	2.15861e-11
29.68	2.17219e-11	2.15854e-11
29.7	2.1713e-11	2.15873e-11
29.72	2.17242e-11	2.15918e-11
29.74	2.17178e-11	2.15852e-11
29.76	2.17177e-11	2.15756e-11
29.78	2.17215e-11	2.15887e-11
29.8	2.17227e-11	2.15873e-11
29.82	2.17232e-11	2.15821e-11
29.84	2.17184e-11	2.15873e-11
29.86	2.17185e-11	2.1591e-11
29.88	2.17246e-11	2.15847e-11
29.9	2.17194e-11	2.15907e-11
29.92	2.17199e-11	2.15851e-11
29.94	2.1718e-11	2.15865e-11
29.96	2.17227e-11	2.15913e-11
29.98	2.17182e-11	2.15868e-11
30	2.17222e-11	2.15884e-11
30.02	2.17174e-11	2.15859e-11
30.04	2.1714e-11	2.15873e-11
30.06	2.17162e-11	2.15896e-11
30.08	2.172e-11	2.15817e-11
30.1	2.17219e-11	2.15845e-11
30.12	2.17218e-11	2.15824e-11
30.14	2.17225e-11	2.15874e-11
30.16	2.17172e-11	2.15862e-11
30.18	2.17218e-11	2.15852e-11
30.2	2.17215e-11	2.1584e-11
30.22	2.17152e-11	2.15838e-11
30.24	2.17241e-11	2.15828e-11
30.26	2.17139e-11	2.1588e-11
30.28	2.1718e-11	2.15847e-11
30.3	2.1722e-11	2.15899e-11
30.32	2.17226e-11	2.15846e-11
30.34	2.172e-11	2.15819e-11
30.36	2.17251e-11	2.15853e-11
30.38	2.17274e-11	2.15819e-11
30.4	2.17201e-11	2.1587e-11
30.42	2.17222e-11	2.15812e-11
30.44	2.17268e-11	2.15842e-11
30.46	2.17212e-11	2.15813e-11
30.48	2.17231e-11	2.1582e-11
30.5	2.17177e-11	2.15829e-11
30.52	2.1732e-11	2.15791e-11
30.54	2.17243e-11	2.15837e-11
30.56	2.17151e-11	2.15886e-11
30.58	2.17243e-11	2.15789e-11
30.6	2.17228e-11	2.15899e-11
30.62	2.17217e-11	2.15873e-11
30.64	2.17153e-11	2.15844e-11
30.66	2.17218e-11	2.15756e-11
30.68	2.17185e-11	2.15853e-11
30.7	2.17264e-11	2.15843e-11
30.72	2.17147e-11	2.15837e-11
30.74	2.17231e-11	2.1582e-11
30.76	2.17175e-11	2.15787e-11
30.78	2.17234e-11	2.15873e-11
30.8	2.17173e-11	2.15844e-11
30.82	2.17199e-11	2.15479e-11
30.84	2.1725e-11	2.15346e-11
30.86	2.17227e-11	2.15392e-11
30.88	2.17196e-11	2.15424e-11
30.9	2.17238e-11	2.15339e-11
30.92	2.17201e-11	2.1528e-11
30.94	2.17189e-11	2.15316e-11
30.96	2.17214e-11	2.15356e-11
30.98	2.17191e-11	2.15278e-11
31	2.17138e-11	2.15272e-11
31.02	2.17133e-11	2.15269e-11
31.04	2.17185e-11	2.15298e-11
31.06	2.17278e-11	2.1538e-11
31.08	2.17153e-11	2.15219e-11
31.1	2.17197e-11	2.15396e-11
31.12	2.17166e-11	2.15223e-11
31.14	2.17213e-11	2.15207e-11
31.16	2.17244e-11	2.15273e-11
31.18	2.17261e-11	2.15261e-11
31.2	2.17257e-11	2.1524e-11
31.22	2.17247e-11	2.15312e-11
31.24	2.17225e-11	2.15297e-11
31.26	2.17156e-11	2.15246e-11
31.28	2.17223e-11	2.15207e-11
31.3	2.17173e-11	2.1526e-11
31.32	2.17218e-11	2.15243e-11
31.34	2.17212e-11	2.15256e-11
31.36	2.17237e-11	2.15255e-11
31.38	2.17187e-11	2.15267e-11
31.4	2.17204e-11	2.15266e-11
31.42	2.17162e-11	2.15198e-11
31.44	2.17131e-11	2.15216e-11
31.46	2.17103e-11	2.15308e-11
31.48	2.1722e-11	2.15333e-11
31.5	2.17217e-11	2.15244e-11
31.52	2.17188e-11	2.15202e-11
31.54	2.17215e-11	2.15274e-11
31.56	2.17146e-11	2.15321e-11
31.58	2.17139e-11	2.15255e-11
31.6	2.17121e-11	2.15209e-11
31.62	2.17156e-11	2.15303e-11
31.64	2.1721e-11	2.15266e-11
31.66	2.17225e-11	2.15328e-11
31.68	2.17207e-11	2.15326e-11
31.7	2.17247e-11	2.15316e-11
31.72	2.17222e-11	2.15261e-11
31.74	2.17266e-11	2.15208e-11
31.76	2.17237e-11	2.15314e-11
31.78	2.1722e-11	2.15246e-11
31.8	2.17231e-11	2.15293e-11
31.82	2.17238e-11	2.15295e-11
31.84	2.17218e-11	2.15329e-11
31.86	2.17193e-11	2.15206e-11
31.88	2.17208e-11	2.15267e-11
31.9	2.17184e-11	2.15293e-11
31.92	2.17193e-11	2.15234e-11
31.94	2.17176e-11	2.15196e-11
31.96	2.17174e-11	2.15285e-11
31.98	2.17174e-11	2.15318e-11
32	2.17203e-11	2.15256e-11
32.02	2.17197e-11	2.15301e-11
32.04	2.17194e-11	2.15296e-11
32.06	2.17189e-11	2.15224e-11
32.08	2.17236e-11	2.15286e-11
32.1	2.1715e-11	2.15332e-11
32.12	2.17236e-11	2.15228e-11
32.14	2.17212e-11	2.15285e-11
32.16	2.1718e-11	2.15344e-11
32.18	2.17224e-11	2.15256e-11
32.2	2.17188e-11	2.15347e-11
32.22	2.17214e-11	2.15317e-11
32.24	2.17222e-11	2.15339e-11
32.26	2.17189e-11	2.15299e-11
32.28	2.17187e-11	2.15305e-11
32.3	2.17192e-11	2.15334e-11
32.32	2.17145e-11	2.1537e-11
32.34	2.17204e-11	2.15289e-11
32.36	2.1715e-11	2.15313e-11
32.38	2.17257e-11	2.15319e-11
32.4	2.172e-11	2.15258e-11
32.42	2.1722e-11	2.15319e-11
32.44	2.17205e-11	2.15368e-11
32.46	2.17258e-11	2.15298e-11
32.48	2.1717e-11	2.15326e-11
32.5	2.1717e-11	2.1535e-11
32.52	2.17174e-11	2.15304e-11
32.54	2.1726e-11	2.15247e-11
32.56	2.17209e-11	2.15304e-11
32.58	2.17168e-11	2.15258e-11
32.6	2.17242e-11	2.15326e-11
32.62	2.17197e-11	2.15308e-11
32.64	2.17214e-11	2.15291e-11
32.66	2.17243e-11	2.15339e-11
32.68	2.17184e-11	2.1529e-11
32.7	2.17223e-11	2.15343e-11
32.72	2.17186e-11	2.1537e-11
32.74	2.17183e-11	2.15379e-11
32.76	2.17206e-11	2.15347e-11
32.78	2.17176e-11	2.15327e-11
32.8	2.17177e-11	2.15411e-11
32.82	2.17187e-11	2.15319e-11
32.84	2.17237e-11	2.15334e-11
32.86	2.1724e-11	2.15343e-11
32.88	2.17187e-11	2.15374e-11
32.9	2.1722e-11	2.15388e-11
32.92	2.17253e-11	2.15392e-11
32.94	2.17201e-11	2.15388e-11
32.96	2.17228e-11	2.15434e-11
32.98	2.17207e-11	2.15411e-11
33	2.17216e-11	2.15395e-11
33.02	2.17203e-11	2.15403e-11
33.04	2.17205e-11	2.15419e-11
33.06	2.1717e-11	2.15345e-11
33.08	2.17166e-11	2.15362e-11
33.1	2.17207e-11	2.15448e-11
33.12	2.17164e-11	2.15393e-11
33.14	2.17161e-11	2.15465e-11
33.16	2.17253e-11	2.15392e-11
33.18	2.17204e-11	2.15483e-11
33.2	2.17203e-11	2.1544e-11
33.22	2.17214e-11	2.15468e-11
33.24	2.17165e-11	2.15484e-11
33.26	2.17183e-11	2.1545e-11
33.28	2.1716e-11	2.15466e-11
33.3	2.17223e-11	2.1554e-11
33.32	2.17201e-11	2.15445e-11
33.34	2.17224e-11	2.15473e-11
33.36	2.17194e-11	2.15533e-11
33.38	2.17213e-11	2.1552e-11
33.4	2.17181e-11	2.15489e-11
33.42	2.1723e-11	2.15456e-11
33.44	2.17181e-11	2.15531e-11
33.46	2.1717e-11	2.15501e-11
33.48	2.17226e-11	2.15465e-11
33.5	2.17184e-11	2.15448e-11
33.52	2.17202e-11	2.15558e-11
33.54	2.17191e-11	2.15469e-11
33.56	2.17267e-11	2.15461e-11
33.58	2.1722e-11	2.15494e-11
33.6	2.17235e-11	2.15521e-11
33.62	2.17199e-11	2.15547e-11
33.64	2.1723e-11	2.15545e-11
33.66	2.17149e-11	2.15482e-11
33.68	2.17165e-11	2.15532e-11
33.7	2.17259e-11	2.15475e-11
33.72	2.17212e-11	2.15511e-11
33.74	2.17188e-11	2.15556e-11
33.76	2.17148e-11	2.15496e-11
33.78	2.17215e-11	2.15589e-11
33.8	2.17188e-11	2.15557e-11
33.82	2.17256e-11	2.15606e-11
33.84	2.17186e-11	2.15568e-11
33.86	2.17214e-11	2.15615e-11
33.88	2.17251e-11	2.15576e-11
33.9	2.1721e-11	2.15589e-11
33.92	2.17168e-11	2.15532e-11
33.94	2.17236e-11	2.15568e-11
33.96	2.17143e-11	2.15605e-11
33.98	2.17191e-11	2.15616e-11
34	2.17133e-11	2.15537e-11
34.02	2.1717e-11	2.15573e-11
34.04	2.17141e-11	2.15571e-11
34.06	2.17252e-11	2.1552e-11
34.08	2.17194e-11	2.15597e-11
34.1	2.17251e-11	2.1558e-11
34.12	2.17184e-11	2.15593e-11
34.14	2.17189e-11	2.15669e-11
34.16	2.17172e-11	2.15618e-11
34.18	2.17229e-11	2.15648e-11
34.2	2.17221e-11	2.15684e-11
34.22	2.17195e-11	2.1561e-11
34.24	2.1717e-11	2.1564e-11
34.26	2.17171e-11	2.15677e-11
34.28	2.17179e-11	2.15668e-11
34.3	2.17169e-11	2.15698e-11
34.32	2.17159e-11	2.15661e-11
34.34	2.17195e-11	2.15705e-11
34.36	2.17161e-11	2.15692e-11
34.38	2.1715e-11	2.15735e-11
34.4	2.17164e-11	2.15729e-11
34.42	2.17124e-11	2.1572e-11
34.44	2.17199e-11	2.15661e-11
34.46	2.17217e-11	2.15696e-11
34.48	2.17127e-11	2.15707e-11
34.5	2.17109e-11	2.15742e-11
34.52	2.17193e-11	2.1574e-11
34.54	2.17159e-11	2.15698e-11
34.56	2.17192e-11	2.15743e-11
34.58	2.17165e-11	2.15695e-11
34.6	2.17141e-11	2.15785e-11
34.62	2.17226e-11	2.15785e-11
34.64	2.17198e-11	2.15791e-11
34.66	2.17168e-11	2.15789e-11
34.68	2.17118e-11	2.15749e-11
34.7	2.17203e-11	2.15783e-11
34.72	2.17241e-11	2.158e-11
34.74	2.17247e-11	2.15722e-11
34.76	2.17169e-11	2.15767e-11
34.78	2.17242e-11	2.15752e-11
34.8	2.17229e-11	2.15776e-11
34.82	2.17171e-11	2.15754e-11
34.84	2.17157e-11	2.15828e-11
34.86	2.17157e-11	2.15784e-11
34.88	2.17139e-11	2.15809e-11
34.9	2.1715e-11	2.15764e-11
34.92	2.17205e-11	2.1584e-11
34.94	2.17154e-11	2.15854e-11
34.96	2.1714e-11	2.15762e-11
34.98	2.17162e-11	2.15822e-11
35	2.17146e-11	2.15835e-11
35.02	2.17188e-11	2.15831e-11
35.04	2.17116e-11	2.15799e-11
35.06	2.17169e-11	2.15788e-11
35.08	2.17114e-11	2.15852e-11
35.1	2.17154e-11	2.15867e-11
35.12	2.17174e-11	2.15799e-11
35.14	2.17104e-11	2.15796e-11
35.16	2.17124e-11	2.1583e-11
35.18	2.17147e-11	2.15882e-11
35.2	2.17192e-11	2.15797e-11
35.22	2.17125e-11	2.15874e-11
35.24	2.17142e-11	2.15819e-11
35.26	2.17202e-11	2.15873e-11
35.28	2.17082e-11	2.15876e-11
35.3	2.17152e-11	2.15851e-11
35.32	2.17183e-11	2.15842e-11
35.34	2.17146e-11	2.1584e-11
35.36	2.17121e-11	2.15873e-11
35.38	2.17101e-11	2.15857e-11
35.4	2.17164e-11	2.1587e-11
35.42	2.17135e-11	2.15778e-11
35.44	2.17183e-11	2.15799e-11
35.46	2.17191e-11	2.15862e-11
35.48	2.17133e-11	2.15946e-11
35.5	2.17155e-11	2.15809e-11
35.52	2.17116e-11	2.15844e-11
35.54	2.17111e-11	2.1585e-11
35.56	2.17091e-11	2.15856e-11
35.58	2.17146e-11	2.15864e-11
35.6	2.17107e-11	2.15851e-11
35.62	2.17166e-11	2.15903e-11
35.64	2.17134e-11	2.15926e-11
35.66	2.17138e-11	2.15917e-11
35.68	2.17093e-11	2.1581e-11
35.7	2.17172e-11	2.15823e-11
35.72	2.17138e-11	2.15924e-11
35.74	2.17153e-11	2.15897e-11
35.76	2.17169e-11	2.15893e-11
35.78	2.17133e-11	2.16003e-11
35.8	2.17157e-11	2.15977e-11
35.82	2.17142e-11	2.15969e-11
35.84	2.17138e-11	2.15965e-11
35.86	2.17056e-11	2.15977e-11
35.88	2.171e-11	2.1593e-11
35.9	2.1714e-11	2.15956e-11
35.92	2.17098e-11	2.16015e-11
35.94	2.17141e-11	2.15926e-11
35.96	2.17159e-11	2.15947e-11
35.98	2.17135e-11	2.16102e-11
36	2.17062e-11	2.16021e-11
36.02	2.17142e-11	2.16054e-11
36.04	2.17123e-11	2.16026e-11
36.06	2.17125e-11	2.16022e-11
36.08	2.17164e-11	2.1602e-11
36.1	2.17166e-11	2.16009e-11
36.12	2.17221e-11	2.16e-11
36.14	2.17122e-11	2.15997e-11
36.16	2.17056e-11	2.16067e-11
36.18	2.17089e-11	2.16061e-11
36.2	2.17146e-11	2.16018e-11
36.22	2.17145e-11	2.16098e-11
36.24	2.17122e-11	2.16045e-11
36.26	2.17109e-11	2.16023e-11
36.28	2.17164e-11	2.16098e-11
36.3	2.17161e-11	2.16081e-11
36.32	2.17132e-11	2.16078e-11
36.34	2.17138e-11	2.15996e-11
36.36	2.17119e-11	2.16088e-11
36.38	2.17067e-11	2.16067e-11
36.4	2.17171e-11	2.16064e-11
36.42	2.17163e-11	2.16068e-11
36.44	2.17143e-11	2.16032e-11
36.46	2.17127e-11	2.1609e-11
36.48	2.17112e-11	2.16097e-11
36.5	2.17086e-11	2.16183e-11
36.52	2.17164e-11	2.16108e-11
36.54	2.17155e-11	2.16079e-11
36.56	2.17144e-11	2.16153e-11
36.58	2.17147e-11	2.16127e-11
36.6	2.17121e-11	2.16128e-11
36.62	2.17134e-11	2.16194e-11
36.64	2.17117e-11	2.16168e-11
36.66	2.17123e-11	2.16147e-11
36.68	2.17105e-11	2.16146e-11
36.7	2.1707e-11	2.16194e-11
36.72	2.17072e-11	2.16146e-11
36.74	2.17108e-11	2.16217e-11
36.76	2.1707e-11	2.16196e-11
36.78	2.17132e-11	2.16139e-11
36.8	2.17107e-11	2.16137e-11
36.82	2.17081e-11	2.16119e-11
36.84	2.17141e-11	2.16239e-11
36.86	2.1711e-11	2.1626e-11
36.88	2.17113e-11	2.16208e-11
36.9	2.17067e-11	2.16176e-11
36.92	2.17137e-11	2.16156e-11
36.94	2.17115e-11	2.16176e-11
36.96	2.17103e-11	2.16164e-11
36.98	2.17152e-11	2.1622e-11
37	2.17095e-11	2.16195e-11
37.02	2.17063e-11	2.16212e-11
37.04	2.17062e-11	2.16264e-11
37.06	2.1717e-11	2.16226e-11
37.08	2.17157e-11	2.16189e-11
37.1	2.17107e-11	2.16204e-11
37.12	2.16854e-11	2.16202e-11
37.14	2.17028e-11	2.16241e-11
37.16	2.1706e-11	2.16229e-11
37.18	2.17229e-11	2.16174e-11
37.2	2.17287e-11	2.16191e-11
37.22	2.17417e-11	2.16226e-11
37.24	2.17474e-11	2.16262e-11
37.26	2.17719e-11	2.16248e-11
37.28	2.17788e-11	2.16225e-11
37.3	2.17855e-11	2.16221e-11
37.32	2.17851e-11	2.16354e-11
37.34	2.17882e-11	2.16197e-11
37.36	2.17826e-11	2.16267e-11
37.38	2.17938e-11	2.16255e-11
37.4	2.17978e-11	2.16261e-11
37.42	2.17901e-11	2.16272e-11
37.44	2.17959e-11	2.16287e-11
37.46	2.17991e-11	2.16343e-11
37.48	2.18052e-11	2.16242e-11
37.5	2.17934e-11	2.16302e-11
37.52	2.17994e-11	2.16296e-11
37.54	2.17918e-11	2.1633e-11
37.56	2.17954e-11	2.16386e-11
37.58	2.18015e-11	2.16411e-11
37.6	2.17931e-11	2.1632e-11
37.62	2.17874e-11	2.16312e-11
37.64	2.17999e-11	2.16302e-11
37.66	2.179e-11	2.16317e-11
37.68	2.17923e-11	2.16308e-11
37.7	2.17909e-11	2.16353e-11
37.72	2.17848e-11	2.16338e-11
37.74	2.17907e-11	2.16346e-11
37.76	2.17886e-11	2.16281e-11
37.78	2.17853e-11	2.16315e-11
37.8	2.17919e-11	2.16318e-11
37.82	2.1782e-11	2.16334e-11
37.84	2.17901e-11	2.1636e-11
37.86	2.17871e-11	2.16357e-11
37.88	2.17811e-11	2.16345e-11
37.9	2.17877e-11	2.16304e-11
37.92	2.17824e-11	2.16322e-11
37.94	2.17868e-11	2.16378e-11
37.96	2.17864e-11	2.16423e-11
37.98	2.17958e-11	2.16346e-11
38	2.17884e-11	2.16336e-11
38.02	2.17841e-11	2.16414e-11
38.04	2.17792e-11	2.16385e-11
38.06	2.17787e-11	2.16339e-11
38.08	2.17894e-11	2.16464e-11
38.1	2.17842e-11	2.16414e-11
38.12	2.17801e-11	2.1641e-11
38.14	2.17797e-11	2.16398e-11
38.16	2.17859e-11	2.16409e-11
38.18	2.17797e-11	2.16344e-11
38.2	2.17799e-11	2.16404e-11
38.22	2.17881e-11	2.16403e-11
38.24	2.17848e-11	2.16376e-11
38.26	2.17811e-11	2.16375e-11
38.28	2.17863e-11	2.16464e-11
38.3	2.1784e-11	2.16415e-11
38.32	2.17795e-11	2.16351e-11
38.34	2.17855e-11	2.16459e-11
38.36	2.17829e-11	2.16457e-11
38.38	2.17802e-11	2.16439e-11
38.4	2.17808e-11	2.16428e-11
38.42	2.17773e-11	2.16486e-11
38.44	2.17825e-11	2.16491e-11
38.46	2.17863e-11	2.16453e-11
38.48	2.17755e-11	2.16474e-11
38.5	2.17813e-11	2.16501e-11
38.52	2.17779e-11	2.16481e-11
38.54	2.17809e-11	2.16528e-11
38.56	2.17739e-11	2.16495e-11
38.58	2.17832e-11	2.16442e-11
38.6	2.17755e-11	2.16503e-11
38.62	2.17757e-11	2.16464e-11
38.64	2.1779e-11	2.16551e-11
38.66	2.17737e-11	2.16475e-11
38.68	2.17824e-11	2.16499e-11
38.7	2.17846e-11	2.16534e-11
38.72	2.1783e-11	2.16504e-11
38.74	2.17836e-11	2.16448e-11
38.76	2.17848e-11	2.16487e-11
38.78	2.17786e-11	2.16556e-11
38.8	2.1779e-11	2.16534e-11
38.82	2.17745e-11	2.16451e-11
38.84	2.17841e-11	2.16469e-11
38.86	2.17831e-11	2.16437e-11
38.88	2.17847e-11	2.16461e-11
38.9	2.17827e-11	2.16509e-11
38.92	2.17819e-11	2.16529e-11
38.94	2.17905e-11	2.1657e-11
38.96	2.17773e-11	2.16548e-11
38.98	2.17798e-11	2.16515e-11
39	2.17839e-11	2.16475e-11
39.02	2.17807e-11	2.16507e-11
39.04	2.17905e-11	2.16519e-11
39.06	2.17764e-11	2.16534e-11
39.08	2.17813e-11	2.16543e-11
39.1	2.17866e-11	2.16601e-11
39.12	2.1785e-11	2.1663e-11
39.14	2.17862e-11	2.16558e-11
39.16	2.17768e-11	2.16615e-11
39.18	2.17868e-11	2.16571e-11
39.2	2.1777e-11	2.1657e-11
39.22	2.17779e-11	2.16567e-11
39.24	2.17791e-11	2.16591e-11
39.26	2.17813e-11	2.16605e-11
39.28	2.17826e-11	2.1658e-11
39.3	2.17767e-11	2.16565e-11
39.32	2.17776e-11	2.16622e-11
39.34	2.17772e-11	2.16589e-11
39.36	2.17828e-11	2.16618e-11
39.38	2.17852e-11	2.16544e-11
39.4	2.17795e-11	2.16628e-11
39.42	2.17746e-11	2.16558e-11
39.44	2.17819e-11	2.16676e-11
39.46	2.17801e-11	2.16539e-11
39.48	2.17872e-11	2.16515e-11
39.5	2.17847e-11	2.16512e-11
39.52	2.17795e-11	2.16574e-11
39.54	2.17858e-11	2.16615e-11
39.56	2.17776e-11	2.1656e-11
39.58	2.17803e-11	2.16617e-11
39.6	2.17867e-11	2.16691e-11
39.62	2.17758e-11	2.16706e-11
39.64	2.17783e-11	2.16605e-11
39.66	2.17811e-11	2.16573e-11
39.68	2.17801e-11	2.16636e-11
39.7	2.17818e-11	2.16706e-11
39.72	2.17914e-11	2.16687e-11
39.74	2.17781e-11	2.16681e-11
39.76	2.17855e-11	2.16727e-11
39.78	2.17794e-11	2.16716e-11
39.8	2.17806e-11	2.16627e-11
39.82	2.17883e-11	2.16705e-11
39.84	2.17779e-11	2.16666e-11
39.86	2.17799e-11	2.16669e-11
39.88	2.17795e-11	2.16646e-11
39.9	2.17799e-11	2.16647e-11
39.92	2.17835e-11	2.16637e-11
39.94	2.17862e-11	2.16704e-11
39.96	2.17862e-11	2.1675e-11
[truncated: 4,002 more rows]
