# Supplementary material for: A label-free approach to detect ligand binding to cell surface proteins in real time
Source: eLife journal article supplement (doi:10.7554/elife.34944), 2018-04-26
Supplement: supp [file Fig5l.xlsx]

## Sheet: 100uM 5HT
	Cm(F)
Time (s)	18306001-013.abf_sec57-93	18306015-019.abf_sec170-205	18306021-031.abf_sec140-180	18306033-044.abf_sec310-370	18306046-056.abf_sec160-220	18306063-067.abf_sec140-190	18306069-076.abf_sec10-60	18306078-082.abf_sec160-210	18306084-088.abf_sec15-65	18306090-094.abf_sec15-65	18306096-100.abf_sec15-60	18306102-110.abf_sec315-365	18306112-122.abf_sec160-210	18306124-134.abf_sec465-520	18306136-147.abf_sec168-193	18306168-178.abf_sec460-510	18306180-191.abf_sec170-195	18330065-70.abf_sec15-75	18330072.abf_sec24-39
0.02	1.35172e-11	1.78207e-11	2.40253e-11	1.62489e-11	1.73708e-11	1.88355e-11	3.74018e-11	1.41312e-11	1.81849e-11	1.48503e-11	4.35544e-11	1.50602e-11	1.68865e-11	1.70007e-11	1.14008e-11	1.98393e-11	1.52161e-11	1.88068e-11	2.98934e-11
0.04	1.35208e-11	1.78061e-11	2.40106e-11	1.62484e-11	1.73671e-11	1.88433e-11	3.74004e-11	1.41304e-11	1.81846e-11	1.48482e-11	4.35691e-11	1.50643e-11	1.68863e-11	1.70078e-11	1.14031e-11	1.98387e-11	1.52206e-11	1.88026e-11	2.98868e-11		∆CM elicited by 100 µM 5-HT in absence of extracellular chloride.
0.06	1.35223e-11	1.78228e-11	2.40164e-11	1.62489e-11	1.73732e-11	1.88463e-11	3.73982e-11	1.41313e-11	1.81821e-11	1.48512e-11	4.3562e-11	1.50602e-11	1.68861e-11	1.70094e-11	1.13963e-11	1.98381e-11	1.52194e-11	1.88018e-11	2.98848e-11
0.08	1.35247e-11	1.78136e-11	2.40201e-11	1.62545e-11	1.73758e-11	1.88399e-11	3.73933e-11	1.41314e-11	1.81846e-11	1.48483e-11	4.35694e-11	1.50599e-11	1.68969e-11	1.69999e-11	1.13997e-11	1.98401e-11	1.52249e-11	1.88051e-11	2.98932e-11
0.1	1.3527e-11	1.78214e-11	2.40282e-11	1.62539e-11	1.73734e-11	1.88367e-11	3.73944e-11	1.41353e-11	1.81803e-11	1.48503e-11	4.35542e-11	1.50638e-11	1.68964e-11	1.70015e-11	1.14059e-11	1.98443e-11	1.52279e-11	1.87997e-11	2.98967e-11
0.12	1.35257e-11	1.78178e-11	2.40111e-11	1.62489e-11	1.73812e-11	1.88442e-11	3.73989e-11	1.41348e-11	1.81847e-11	1.48514e-11	4.35609e-11	1.50623e-11	1.68985e-11	1.7009e-11	1.14035e-11	1.98393e-11	1.52238e-11	1.88051e-11	2.98814e-11
0.14	1.35249e-11	1.7815e-11	2.40224e-11	1.62564e-11	1.73709e-11	1.88437e-11	3.73985e-11	1.41303e-11	1.81832e-11	1.48526e-11	4.35819e-11	1.50621e-11	1.68988e-11	1.70023e-11	1.14037e-11	1.98446e-11	1.52291e-11	1.88094e-11	2.98999e-11
0.16	1.3525e-11	1.7814e-11	2.40229e-11	1.6255e-11	1.73718e-11	1.88366e-11	3.74079e-11	1.41401e-11	1.81819e-11	1.48561e-11	4.35604e-11	1.50577e-11	1.68939e-11	1.70056e-11	1.14008e-11	1.98441e-11	1.52215e-11	1.88065e-11	2.9893e-11
0.18	1.35222e-11	1.7821e-11	2.40179e-11	1.62557e-11	1.73756e-11	1.88239e-11	3.74085e-11	1.4131e-11	1.81796e-11	1.48546e-11	4.35706e-11	1.50647e-11	1.68983e-11	1.70091e-11	1.14011e-11	1.98405e-11	1.52192e-11	1.88053e-11	2.98954e-11
0.2	1.352e-11	1.78231e-11	2.40354e-11	1.62566e-11	1.73723e-11	1.88284e-11	3.74037e-11	1.41279e-11	1.81847e-11	1.48517e-11	4.3572e-11	1.50586e-11	1.69038e-11	1.70031e-11	1.14059e-11	1.98384e-11	1.52197e-11	1.88046e-11	2.98953e-11
0.22	1.35194e-11	1.78204e-11	2.40245e-11	1.62497e-11	1.73709e-11	1.88243e-11	3.73983e-11	1.4132e-11	1.81843e-11	1.48501e-11	4.35747e-11	1.50611e-11	1.68902e-11	1.70021e-11	1.14063e-11	1.98462e-11	1.52121e-11	1.88055e-11	2.98888e-11
0.24	1.35232e-11	1.78266e-11	2.40171e-11	1.62497e-11	1.7372e-11	1.88318e-11	3.74082e-11	1.41405e-11	1.81777e-11	1.4851e-11	4.35596e-11	1.50615e-11	1.68851e-11	1.70074e-11	1.14025e-11	1.9841e-11	1.52145e-11	1.8805e-11	2.98895e-11
0.26	1.35198e-11	1.7826e-11	2.40069e-11	1.62521e-11	1.73735e-11	1.8836e-11	3.74034e-11	1.41349e-11	1.81814e-11	1.48494e-11	4.35575e-11	1.50629e-11	1.68849e-11	1.70042e-11	1.13979e-11	1.9846e-11	1.5218e-11	1.8799e-11	2.98933e-11
0.28	1.35149e-11	1.78219e-11	2.40246e-11	1.62511e-11	1.73724e-11	1.88375e-11	3.74023e-11	1.41339e-11	1.81773e-11	1.48509e-11	4.35605e-11	1.50586e-11	1.68839e-11	1.70075e-11	1.13959e-11	1.9843e-11	1.52194e-11	1.8808e-11	2.98989e-11
0.3	1.35194e-11	1.78192e-11	2.40339e-11	1.62595e-11	1.73702e-11	1.8842e-11	3.74087e-11	1.41359e-11	1.81799e-11	1.48484e-11	4.35681e-11	1.50598e-11	1.68875e-11	1.70076e-11	1.1397e-11	1.98448e-11	1.52176e-11	1.88079e-11	2.98969e-11
0.32	1.35232e-11	1.78209e-11	2.40236e-11	1.62516e-11	1.73773e-11	1.88356e-11	3.74095e-11	1.41298e-11	1.81793e-11	1.48546e-11	4.35702e-11	1.50544e-11	1.68822e-11	1.70073e-11	1.14039e-11	1.98434e-11	1.52222e-11	1.88061e-11	2.99142e-11
0.34	1.35213e-11	1.78203e-11	2.40176e-11	1.62511e-11	1.73743e-11	1.88417e-11	3.74058e-11	1.41246e-11	1.81784e-11	1.4852e-11	4.35624e-11	1.50621e-11	1.68858e-11	1.70089e-11	1.14007e-11	1.98454e-11	1.52211e-11	1.88003e-11	2.99149e-11
0.36	1.35162e-11	1.78237e-11	2.40096e-11	1.62523e-11	1.7375e-11	1.88373e-11	3.74054e-11	1.41325e-11	1.81786e-11	1.4849e-11	4.3572e-11	1.5062e-11	1.68847e-11	1.70046e-11	1.14003e-11	1.98412e-11	1.52159e-11	1.88066e-11	2.99118e-11
0.38	1.35186e-11	1.78248e-11	2.4011e-11	1.62496e-11	1.73741e-11	1.88352e-11	3.74089e-11	1.41292e-11	1.81756e-11	1.48545e-11	4.35736e-11	1.50591e-11	1.68832e-11	1.70061e-11	1.14056e-11	1.9841e-11	1.52215e-11	1.88022e-11	2.99021e-11
0.4	1.35211e-11	1.78272e-11	2.40155e-11	1.62512e-11	1.73675e-11	1.8837e-11	3.74097e-11	1.41339e-11	1.81795e-11	1.48511e-11	4.35715e-11	1.50568e-11	1.68856e-11	1.70083e-11	1.14042e-11	1.98468e-11	1.5216e-11	1.8803e-11	2.99089e-11
0.42	1.35184e-11	1.78197e-11	2.40084e-11	1.62513e-11	1.73729e-11	1.88402e-11	3.74109e-11	1.413e-11	1.81757e-11	1.48465e-11	4.35823e-11	1.50611e-11	1.68838e-11	1.70066e-11	1.13982e-11	1.98447e-11	1.52193e-11	1.8805e-11	2.98891e-11
0.44	1.35261e-11	1.7822e-11	2.40185e-11	1.6255e-11	1.73789e-11	1.88354e-11	3.74104e-11	1.4131e-11	1.81815e-11	1.48514e-11	4.35801e-11	1.50569e-11	1.68888e-11	1.70047e-11	1.13977e-11	1.98477e-11	1.52243e-11	1.88067e-11	2.98919e-11
0.46	1.35254e-11	1.78241e-11	2.40058e-11	1.62452e-11	1.73738e-11	1.88395e-11	3.74129e-11	1.4132e-11	1.81767e-11	1.48519e-11	4.35797e-11	1.50645e-11	1.68878e-11	1.7006e-11	1.14042e-11	1.98463e-11	1.52287e-11	1.87997e-11	2.98847e-11
0.48	1.35231e-11	1.7829e-11	2.40118e-11	1.62503e-11	1.73714e-11	1.88382e-11	3.74097e-11	1.41308e-11	1.81831e-11	1.48531e-11	4.35651e-11	1.50607e-11	1.68852e-11	1.69995e-11	1.14022e-11	1.98392e-11	1.5223e-11	1.88066e-11	2.98885e-11
0.5	1.35221e-11	1.78241e-11	2.40103e-11	1.62518e-11	1.73759e-11	1.88364e-11	3.74069e-11	1.41384e-11	1.81814e-11	1.48515e-11	4.35647e-11	1.50576e-11	1.68861e-11	1.70092e-11	1.14042e-11	1.9837e-11	1.52218e-11	1.88038e-11	2.98982e-11
0.52	1.35184e-11	1.78289e-11	2.40074e-11	1.62498e-11	1.73712e-11	1.88326e-11	3.74175e-11	1.41348e-11	1.81749e-11	1.48516e-11	4.35547e-11	1.5056e-11	1.68909e-11	1.70152e-11	1.1401e-11	1.98418e-11	1.52279e-11	1.88054e-11	2.98936e-11
0.54	1.35195e-11	1.78298e-11	2.40174e-11	1.62465e-11	1.73711e-11	1.88371e-11	3.74176e-11	1.41369e-11	1.81782e-11	1.48506e-11	4.35559e-11	1.50626e-11	1.68891e-11	1.70079e-11	1.13957e-11	1.98447e-11	1.52195e-11	1.88064e-11	2.98933e-11
0.56	1.35222e-11	1.78357e-11	2.40227e-11	1.62534e-11	1.73713e-11	1.88372e-11	3.74151e-11	1.41295e-11	1.81789e-11	1.48465e-11	4.35661e-11	1.50613e-11	1.68875e-11	1.70121e-11	1.14036e-11	1.98445e-11	1.52237e-11	1.8805e-11	2.98841e-11
0.58	1.35156e-11	1.78307e-11	2.40258e-11	1.6253e-11	1.73761e-11	1.88308e-11	3.74084e-11	1.41338e-11	1.81755e-11	1.4853e-11	4.35535e-11	1.50543e-11	1.6886e-11	1.70161e-11	1.14007e-11	1.98449e-11	1.52215e-11	1.88107e-11	2.98803e-11
0.6	1.35256e-11	1.78309e-11	2.40108e-11	1.62534e-11	1.73737e-11	1.88436e-11	3.74115e-11	1.41311e-11	1.81753e-11	1.48483e-11	4.3554e-11	1.50606e-11	1.68851e-11	1.70093e-11	1.14027e-11	1.98444e-11	1.52204e-11	1.88042e-11	2.9872e-11
0.62	1.35217e-11	1.78297e-11	2.40243e-11	1.6255e-11	1.7371e-11	1.88359e-11	3.74135e-11	1.4131e-11	1.81792e-11	1.48487e-11	4.35762e-11	1.50603e-11	1.68862e-11	1.70109e-11	1.14008e-11	1.98441e-11	1.52208e-11	1.88051e-11	2.98807e-11
0.64	1.35259e-11	1.78382e-11	2.40278e-11	1.62482e-11	1.73767e-11	1.88401e-11	3.74143e-11	1.41344e-11	1.81808e-11	1.48533e-11	4.35654e-11	1.50606e-11	1.68839e-11	1.70115e-11	1.14036e-11	1.98442e-11	1.52204e-11	1.88075e-11	2.98713e-11
0.66	1.35293e-11	1.7833e-11	2.40374e-11	1.6254e-11	1.73758e-11	1.88423e-11	3.74186e-11	1.41288e-11	1.81754e-11	1.48512e-11	4.35563e-11	1.50592e-11	1.68855e-11	1.70108e-11	1.1404e-11	1.98501e-11	1.52213e-11	1.88055e-11	2.98693e-11
0.68	1.3525e-11	1.78306e-11	2.40162e-11	1.62526e-11	1.73707e-11	1.8839e-11	3.74128e-11	1.41301e-11	1.81728e-11	1.48487e-11	4.35714e-11	1.50588e-11	1.68836e-11	1.70059e-11	1.13947e-11	1.98434e-11	1.52145e-11	1.8801e-11	2.98736e-11
0.7	1.35263e-11	1.78241e-11	2.40288e-11	1.62493e-11	1.73712e-11	1.88341e-11	3.74126e-11	1.41294e-11	1.81816e-11	1.48518e-11	4.35706e-11	1.50615e-11	1.68837e-11	1.70079e-11	1.14002e-11	1.98419e-11	1.52225e-11	1.88003e-11	2.98704e-11
0.72	1.35237e-11	1.78305e-11	2.40115e-11	1.62522e-11	1.73748e-11	1.88345e-11	3.7417e-11	1.41245e-11	1.81813e-11	1.48481e-11	4.35485e-11	1.50571e-11	1.68813e-11	1.70045e-11	1.14065e-11	1.98435e-11	1.522e-11	1.88007e-11	2.98708e-11
0.74	1.3522e-11	1.78316e-11	2.40335e-11	1.62578e-11	1.73708e-11	1.88386e-11	3.7412e-11	1.41312e-11	1.8176e-11	1.48532e-11	4.35683e-11	1.50582e-11	1.68853e-11	1.70103e-11	1.14013e-11	1.9845e-11	1.52177e-11	1.88009e-11	2.98712e-11
0.76	1.35246e-11	1.78279e-11	2.40168e-11	1.62503e-11	1.7376e-11	1.8838e-11	3.74128e-11	1.41273e-11	1.81708e-11	1.48506e-11	4.35762e-11	1.50568e-11	1.68903e-11	1.70081e-11	1.14048e-11	1.98485e-11	1.5222e-11	1.88066e-11	2.98707e-11
0.78	1.35253e-11	1.78324e-11	2.40341e-11	1.62515e-11	1.73708e-11	1.88363e-11	3.74081e-11	1.41376e-11	1.8176e-11	1.48505e-11	4.35737e-11	1.5058e-11	1.6897e-11	1.70171e-11	1.13981e-11	1.98437e-11	1.52186e-11	1.87995e-11	2.98834e-11
0.8	1.35287e-11	1.78265e-11	2.40159e-11	1.62525e-11	1.73725e-11	1.88367e-11	3.74157e-11	1.41381e-11	1.81799e-11	1.48579e-11	4.35698e-11	1.50629e-11	1.68968e-11	1.70118e-11	1.14088e-11	1.98491e-11	1.52153e-11	1.88008e-11	2.98801e-11
0.82	1.35246e-11	1.7827e-11	2.40218e-11	1.62508e-11	1.73729e-11	1.88383e-11	3.74076e-11	1.41366e-11	1.81808e-11	1.48553e-11	4.35812e-11	1.50582e-11	1.68945e-11	1.7012e-11	1.14058e-11	1.9845e-11	1.52121e-11	1.88052e-11	2.98764e-11
0.84	1.35254e-11	1.78333e-11	2.40201e-11	1.62523e-11	1.73772e-11	1.88342e-11	3.74153e-11	1.41338e-11	1.81744e-11	1.48558e-11	4.35782e-11	1.50609e-11	1.68958e-11	1.70042e-11	1.14023e-11	1.98453e-11	1.52137e-11	1.87977e-11	2.98849e-11
0.86	1.3522e-11	1.7822e-11	2.40262e-11	1.62451e-11	1.7374e-11	1.88362e-11	3.74139e-11	1.41302e-11	1.81772e-11	1.48533e-11	4.356e-11	1.50605e-11	1.68922e-11	1.70096e-11	1.14041e-11	1.98454e-11	1.52142e-11	1.88051e-11	2.98808e-11
0.88	1.35241e-11	1.78207e-11	2.40173e-11	1.62571e-11	1.73727e-11	1.8834e-11	3.74246e-11	1.41289e-11	1.81744e-11	1.48498e-11	4.35691e-11	1.50573e-11	1.68992e-11	1.70105e-11	1.14039e-11	1.98425e-11	1.52151e-11	1.88042e-11	2.98901e-11
0.9	1.35263e-11	1.78249e-11	2.40198e-11	1.62551e-11	1.73672e-11	1.88309e-11	3.74172e-11	1.41291e-11	1.8177e-11	1.48535e-11	4.35568e-11	1.50611e-11	1.68955e-11	1.70114e-11	1.1407e-11	1.98474e-11	1.52167e-11	1.88062e-11	2.9869e-11
0.92	1.35269e-11	1.78276e-11	2.40162e-11	1.62559e-11	1.73705e-11	1.88417e-11	3.74174e-11	1.4134e-11	1.8176e-11	1.48456e-11	4.35688e-11	1.50553e-11	1.68989e-11	1.70104e-11	1.1406e-11	1.98432e-11	1.5216e-11	1.88052e-11	2.98606e-11
0.94	1.35267e-11	1.78115e-11	2.40082e-11	1.62523e-11	1.73686e-11	1.88375e-11	3.74211e-11	1.41316e-11	1.81739e-11	1.48541e-11	4.35497e-11	1.50589e-11	1.68949e-11	1.70069e-11	1.14035e-11	1.98481e-11	1.52174e-11	1.88024e-11	2.98552e-11
0.96	1.35265e-11	1.78212e-11	2.40065e-11	1.62557e-11	1.73695e-11	1.88436e-11	3.74166e-11	1.4133e-11	1.81729e-11	1.4853e-11	4.3562e-11	1.50601e-11	1.69037e-11	1.70102e-11	1.14043e-11	1.98485e-11	1.52221e-11	1.8799e-11	2.98622e-11
0.98	1.35284e-11	1.78258e-11	2.40062e-11	1.62548e-11	1.73704e-11	1.88362e-11	3.74295e-11	1.41269e-11	1.81714e-11	1.48544e-11	4.35709e-11	1.50594e-11	1.6901e-11	1.70073e-11	1.14006e-11	1.98421e-11	1.52178e-11	1.88063e-11	2.98609e-11
1	1.35229e-11	1.78232e-11	2.4014e-11	1.62565e-11	1.73652e-11	1.88395e-11	3.74265e-11	1.41296e-11	1.81703e-11	1.48538e-11	4.35699e-11	1.50592e-11	1.68999e-11	1.70111e-11	1.14035e-11	1.9843e-11	1.52223e-11	1.88049e-11	2.98613e-11
1.02	1.35296e-11	1.78175e-11	2.4007e-11	1.62526e-11	1.73768e-11	1.88392e-11	3.74277e-11	1.41315e-11	1.81665e-11	1.48532e-11	4.35598e-11	1.5056e-11	1.69016e-11	1.70096e-11	1.14111e-11	1.98434e-11	1.52174e-11	1.88065e-11	2.98649e-11
1.04	1.35309e-11	1.78177e-11	2.4009e-11	1.62495e-11	1.73744e-11	1.88407e-11	3.74206e-11	1.41321e-11	1.81741e-11	1.48499e-11	4.35503e-11	1.5056e-11	1.68923e-11	1.70079e-11	1.14043e-11	1.98496e-11	1.52186e-11	1.88048e-11	2.98698e-11
1.06	1.35293e-11	1.78246e-11	2.40169e-11	1.62522e-11	1.73724e-11	1.8836e-11	3.74201e-11	1.41311e-11	1.81718e-11	1.48541e-11	4.35537e-11	1.50576e-11	1.68986e-11	1.70128e-11	1.14037e-11	1.98446e-11	1.5216e-11	1.88074e-11	2.98717e-11
1.08	1.35274e-11	1.78224e-11	2.40182e-11	1.62555e-11	1.73732e-11	1.88373e-11	3.74238e-11	1.41305e-11	1.817e-11	1.48595e-11	4.35511e-11	1.50584e-11	1.68984e-11	1.70153e-11	1.14019e-11	1.98418e-11	1.52211e-11	1.88085e-11	2.98712e-11
1.1	1.35313e-11	1.78175e-11	2.40261e-11	1.62573e-11	1.73723e-11	1.88376e-11	3.74278e-11	1.41315e-11	1.81722e-11	1.48533e-11	4.35574e-11	1.50604e-11	1.68963e-11	1.70079e-11	1.1406e-11	1.98435e-11	1.52148e-11	1.88055e-11	2.98826e-11
1.12	1.3525e-11	1.78165e-11	2.40124e-11	1.62532e-11	1.73711e-11	1.88387e-11	3.74233e-11	1.41372e-11	1.81672e-11	1.48511e-11	4.35417e-11	1.50615e-11	1.69048e-11	1.7009e-11	1.14006e-11	1.98436e-11	1.52188e-11	1.8805e-11	2.9874e-11
1.14	1.35277e-11	1.78234e-11	2.40331e-11	1.6248e-11	1.73744e-11	1.88358e-11	3.74237e-11	1.41299e-11	1.81738e-11	1.48517e-11	4.35532e-11	1.50542e-11	1.68947e-11	1.70154e-11	1.14034e-11	1.98434e-11	1.52166e-11	1.88069e-11	2.98739e-11
1.16	1.35295e-11	1.78226e-11	2.40147e-11	1.62512e-11	1.73733e-11	1.8836e-11	3.74245e-11	1.41328e-11	1.81676e-11	1.48558e-11	4.35847e-11	1.50549e-11	1.6896e-11	1.70084e-11	1.14039e-11	1.98412e-11	1.52159e-11	1.88029e-11	2.9889e-11
1.18	1.35309e-11	1.78189e-11	2.40044e-11	1.62528e-11	1.73759e-11	1.88362e-11	3.74243e-11	1.41325e-11	1.81699e-11	1.48465e-11	4.35465e-11	1.50599e-11	1.69002e-11	1.70124e-11	1.14004e-11	1.98455e-11	1.52188e-11	1.88066e-11	2.98916e-11
1.2	1.35316e-11	1.7822e-11	2.402e-11	1.62473e-11	1.73733e-11	1.88419e-11	3.74283e-11	1.41264e-11	1.81696e-11	1.48582e-11	4.35566e-11	1.50579e-11	1.68935e-11	1.70084e-11	1.14017e-11	1.98425e-11	1.52209e-11	1.88082e-11	2.99e-11
1.22	1.35295e-11	1.78142e-11	2.40346e-11	1.62559e-11	1.73717e-11	1.88373e-11	3.74216e-11	1.41355e-11	1.81673e-11	1.48489e-11	4.35457e-11	1.50614e-11	1.6897e-11	1.70084e-11	1.14055e-11	1.98497e-11	1.5226e-11	1.88016e-11	2.98827e-11
1.24	1.35309e-11	1.78154e-11	2.40208e-11	1.62551e-11	1.73684e-11	1.8843e-11	3.74213e-11	1.41315e-11	1.81653e-11	1.48539e-11	4.35416e-11	1.5058e-11	1.68977e-11	1.70122e-11	1.14049e-11	1.98434e-11	1.52257e-11	1.88114e-11	2.98842e-11
1.26	1.35297e-11	1.78193e-11	2.40279e-11	1.62521e-11	1.7374e-11	1.88358e-11	3.74201e-11	1.41312e-11	1.81691e-11	1.48562e-11	4.35543e-11	1.50564e-11	1.68933e-11	1.701e-11	1.14012e-11	1.98419e-11	1.52212e-11	1.88018e-11	2.98845e-11
1.28	1.35327e-11	1.78185e-11	2.40251e-11	1.62486e-11	1.73764e-11	1.8833e-11	3.74258e-11	1.41363e-11	1.81678e-11	1.4856e-11	4.35488e-11	1.50615e-11	1.69002e-11	1.70164e-11	1.14033e-11	1.98406e-11	1.52253e-11	1.88042e-11	2.98973e-11
1.3	1.3529e-11	1.78135e-11	2.40402e-11	1.62543e-11	1.73717e-11	1.88401e-11	3.74244e-11	1.41264e-11	1.8166e-11	1.48471e-11	4.35611e-11	1.50554e-11	1.68958e-11	1.70132e-11	1.14043e-11	1.98461e-11	1.52173e-11	1.8805e-11	2.9883e-11
1.32	1.3527e-11	1.78154e-11	2.40236e-11	1.62503e-11	1.73743e-11	1.88364e-11	3.74234e-11	1.41265e-11	1.81652e-11	1.48558e-11	4.35562e-11	1.50572e-11	1.68962e-11	1.70154e-11	1.14045e-11	1.98429e-11	1.52235e-11	1.8804e-11	2.98826e-11
1.34	1.3529e-11	1.78192e-11	2.40206e-11	1.62556e-11	1.73712e-11	1.88401e-11	3.74303e-11	1.41283e-11	1.81686e-11	1.48578e-11	4.35516e-11	1.50573e-11	1.68889e-11	1.7015e-11	1.14096e-11	1.98487e-11	1.52186e-11	1.88089e-11	2.98618e-11
1.36	1.35283e-11	1.78238e-11	2.40212e-11	1.6252e-11	1.73735e-11	1.88387e-11	3.74227e-11	1.41315e-11	1.81669e-11	1.4854e-11	4.35563e-11	1.50634e-11	1.68938e-11	1.7014e-11	1.14081e-11	1.98403e-11	1.52218e-11	1.88045e-11	2.9882e-11
1.38	1.35294e-11	1.78133e-11	2.40317e-11	1.62475e-11	1.73735e-11	1.88433e-11	3.74278e-11	1.41244e-11	1.81669e-11	1.48496e-11	4.35509e-11	1.50598e-11	1.68838e-11	1.70102e-11	1.14083e-11	1.98457e-11	1.52238e-11	1.88067e-11	2.98878e-11
1.4	1.35276e-11	1.78188e-11	2.40249e-11	1.62532e-11	1.73756e-11	1.88383e-11	3.74274e-11	1.41247e-11	1.81623e-11	1.48542e-11	4.35443e-11	1.50566e-11	1.68792e-11	1.70087e-11	1.14057e-11	1.98466e-11	1.52278e-11	1.88084e-11	2.98894e-11
1.42	1.35295e-11	1.78146e-11	2.4036e-11	1.62532e-11	1.7375e-11	1.88416e-11	3.74273e-11	1.41344e-11	1.81647e-11	1.48538e-11	4.35438e-11	1.506e-11	1.68796e-11	1.70115e-11	1.14008e-11	1.98463e-11	1.52243e-11	1.88093e-11	2.98979e-11
1.44	1.35287e-11	1.78178e-11	2.40294e-11	1.62535e-11	1.73773e-11	1.88398e-11	3.74263e-11	1.41291e-11	1.81627e-11	1.48511e-11	4.35586e-11	1.50494e-11	1.68845e-11	1.70154e-11	1.14033e-11	1.98434e-11	1.52227e-11	1.88089e-11	2.9886e-11
1.46	1.35223e-11	1.78181e-11	2.40231e-11	1.62582e-11	1.73691e-11	1.8836e-11	3.74268e-11	1.4132e-11	1.81623e-11	1.48516e-11	4.35466e-11	1.50545e-11	1.6898e-11	1.70101e-11	1.14066e-11	1.98438e-11	1.52228e-11	1.88088e-11	2.98918e-11
1.48	1.35265e-11	1.78137e-11	2.4018e-11	1.62503e-11	1.73743e-11	1.88352e-11	3.74237e-11	1.41302e-11	1.81651e-11	1.48565e-11	4.35682e-11	1.50564e-11	1.68893e-11	1.7009e-11	1.14069e-11	1.98454e-11	1.52175e-11	1.88091e-11	2.98817e-11
1.5	1.35242e-11	1.7819e-11	2.40057e-11	1.62537e-11	1.73716e-11	1.8836e-11	3.74302e-11	1.4128e-11	1.81609e-11	1.48547e-11	4.35544e-11	1.50547e-11	1.68888e-11	1.70132e-11	1.14027e-11	1.98449e-11	1.52234e-11	1.881e-11	2.98726e-11
1.52	1.35213e-11	1.78196e-11	2.40209e-11	1.62518e-11	1.73767e-11	1.88395e-11	3.74283e-11	1.41239e-11	1.81582e-11	1.48561e-11	4.35642e-11	1.5056e-11	1.68903e-11	1.7012e-11	1.14042e-11	1.98516e-11	1.52241e-11	1.88026e-11	2.98679e-11
1.54	1.35234e-11	1.78167e-11	2.40029e-11	1.62481e-11	1.73755e-11	1.88346e-11	3.74275e-11	1.41276e-11	1.81609e-11	1.48533e-11	4.35711e-11	1.50542e-11	1.68953e-11	1.70185e-11	1.14008e-11	1.98456e-11	1.5222e-11	1.88063e-11	2.98718e-11
1.56	1.35252e-11	1.78254e-11	2.4025e-11	1.6258e-11	1.73739e-11	1.88394e-11	3.7429e-11	1.41288e-11	1.81602e-11	1.4855e-11	4.35566e-11	1.5054e-11	1.68965e-11	1.70153e-11	1.14096e-11	1.98455e-11	1.52256e-11	1.88099e-11	2.98805e-11
1.58	1.35281e-11	1.78181e-11	2.40208e-11	1.62499e-11	1.7376e-11	1.88377e-11	3.74269e-11	1.41379e-11	1.81578e-11	1.48527e-11	4.35543e-11	1.50538e-11	1.68896e-11	1.70084e-11	1.14057e-11	1.98472e-11	1.52234e-11	1.88044e-11	2.98793e-11
1.6	1.35229e-11	1.78191e-11	2.4015e-11	1.62543e-11	1.73737e-11	1.88374e-11	3.74308e-11	1.41343e-11	1.81585e-11	1.48566e-11	4.35708e-11	1.50536e-11	1.68878e-11	1.70072e-11	1.14037e-11	1.98412e-11	1.52221e-11	1.88029e-11	2.98774e-11
1.62	1.35238e-11	1.78094e-11	2.40238e-11	1.62564e-11	1.73815e-11	1.88385e-11	3.74255e-11	1.41331e-11	1.81603e-11	1.48518e-11	4.35533e-11	1.50537e-11	1.68912e-11	1.7015e-11	1.14071e-11	1.98443e-11	1.52216e-11	1.88093e-11	2.98713e-11
1.64	1.35213e-11	1.78179e-11	2.40235e-11	1.62528e-11	1.73728e-11	1.88395e-11	3.74311e-11	1.41374e-11	1.81583e-11	1.48615e-11	4.35535e-11	1.50485e-11	1.68839e-11	1.70156e-11	1.14053e-11	1.98475e-11	1.52279e-11	1.8809e-11	2.98808e-11
1.66	1.35269e-11	1.78065e-11	2.40249e-11	1.62552e-11	1.73741e-11	1.88386e-11	3.74191e-11	1.41299e-11	1.81572e-11	1.48556e-11	4.35693e-11	1.50604e-11	1.68941e-11	1.70094e-11	1.14079e-11	1.98492e-11	1.5228e-11	1.88083e-11	2.98665e-11
1.68	1.35281e-11	1.78227e-11	2.40241e-11	1.62556e-11	1.73811e-11	1.88407e-11	3.74277e-11	1.41277e-11	1.81601e-11	1.48568e-11	4.35582e-11	1.50529e-11	1.68932e-11	1.70101e-11	1.14085e-11	1.98446e-11	1.52314e-11	1.88024e-11	2.98774e-11
1.7	1.35268e-11	1.78154e-11	2.40273e-11	1.62572e-11	1.73746e-11	1.88395e-11	3.7425e-11	1.41279e-11	1.81536e-11	1.48552e-11	4.35689e-11	1.5058e-11	1.68822e-11	1.70164e-11	1.14043e-11	1.9843e-11	1.52282e-11	1.88101e-11	2.98781e-11
1.72	1.35332e-11	1.78096e-11	2.40226e-11	1.62558e-11	1.73677e-11	1.88372e-11	3.74277e-11	1.41256e-11	1.81546e-11	1.48538e-11	4.35729e-11	1.50458e-11	1.68874e-11	1.70123e-11	1.14037e-11	1.98454e-11	1.52304e-11	1.88089e-11	2.98816e-11
1.74	1.35297e-11	1.78052e-11	2.40242e-11	1.62584e-11	1.73713e-11	1.88365e-11	3.74261e-11	1.41328e-11	1.81525e-11	1.48541e-11	4.3554e-11	1.50609e-11	1.68848e-11	1.7012e-11	1.14104e-11	1.98468e-11	1.52275e-11	1.88063e-11	2.98646e-11
1.76	1.35261e-11	1.78128e-11	2.40371e-11	1.62585e-11	1.73763e-11	1.88376e-11	3.74278e-11	1.41306e-11	1.81485e-11	1.48541e-11	4.35667e-11	1.5052e-11	1.68813e-11	1.70112e-11	1.14015e-11	1.98481e-11	1.52252e-11	1.88063e-11	2.98624e-11
1.78	1.35273e-11	1.78056e-11	2.40205e-11	1.62482e-11	1.73677e-11	1.88343e-11	3.74297e-11	1.41323e-11	1.81571e-11	1.48566e-11	4.35564e-11	1.50512e-11	1.6878e-11	1.70124e-11	1.14052e-11	1.98473e-11	1.52307e-11	1.88057e-11	2.98629e-11
1.8	1.35255e-11	1.78027e-11	2.40258e-11	1.62564e-11	1.73712e-11	1.88295e-11	3.74293e-11	1.41282e-11	1.81524e-11	1.48532e-11	4.35628e-11	1.50524e-11	1.68802e-11	1.702e-11	1.1404e-11	1.98491e-11	1.523e-11	1.88045e-11	2.9865e-11
1.82	1.35304e-11	1.78022e-11	2.40288e-11	1.62534e-11	1.73755e-11	1.88319e-11	3.74287e-11	1.41275e-11	1.81512e-11	1.48482e-11	4.35599e-11	1.50516e-11	1.6881e-11	1.70123e-11	1.14046e-11	1.98505e-11	1.52347e-11	1.8811e-11	2.98592e-11
1.84	1.35293e-11	1.78034e-11	2.40288e-11	1.62533e-11	1.73708e-11	1.88271e-11	3.74301e-11	1.41278e-11	1.81544e-11	1.48502e-11	4.35605e-11	1.50565e-11	1.68854e-11	1.70148e-11	1.14098e-11	1.9848e-11	1.52236e-11	1.88066e-11	2.98759e-11
1.86	1.35257e-11	1.78014e-11	2.40194e-11	1.62512e-11	1.73736e-11	1.88246e-11	3.7423e-11	1.41235e-11	1.81538e-11	1.48572e-11	4.35654e-11	1.50532e-11	1.68845e-11	1.70092e-11	1.1412e-11	1.98462e-11	1.52336e-11	1.88009e-11	2.98693e-11
1.88	1.35305e-11	1.78033e-11	2.40232e-11	1.62527e-11	1.73733e-11	1.88226e-11	3.74333e-11	1.41288e-11	1.81541e-11	1.48513e-11	4.35598e-11	1.50566e-11	1.68873e-11	1.70122e-11	1.14081e-11	1.9851e-11	1.52358e-11	1.88039e-11	2.98718e-11
1.9	1.35327e-11	1.78013e-11	2.40362e-11	1.62568e-11	1.73697e-11	1.88223e-11	3.74275e-11	1.413e-11	1.81575e-11	1.4857e-11	4.35617e-11	1.50501e-11	1.68917e-11	1.70103e-11	1.14089e-11	1.98457e-11	1.52362e-11	1.88074e-11	2.98746e-11
1.92	1.35253e-11	1.78056e-11	2.40237e-11	1.62516e-11	1.73723e-11	1.88243e-11	3.74365e-11	1.41274e-11	1.81553e-11	1.48566e-11	4.35473e-11	1.50526e-11	1.68946e-11	1.70138e-11	1.14078e-11	1.98441e-11	1.52308e-11	1.88056e-11	2.98866e-11
1.94	1.35269e-11	1.78067e-11	2.40228e-11	1.62478e-11	1.73714e-11	1.88236e-11	3.74328e-11	1.41218e-11	1.81519e-11	1.48507e-11	4.35703e-11	1.50504e-11	1.68937e-11	1.70155e-11	1.14088e-11	1.98442e-11	1.52344e-11	1.88117e-11	2.98822e-11
1.96	1.35302e-11	1.77998e-11	2.40158e-11	1.62529e-11	1.73693e-11	1.88381e-11	3.74349e-11	1.41249e-11	1.81531e-11	1.485e-11	4.35769e-11	1.50498e-11	1.68898e-11	1.70124e-11	1.1405e-11	1.98367e-11	1.5237e-11	1.88058e-11	2.98798e-11
1.98	1.353e-11	1.7802e-11	2.40317e-11	1.62558e-11	1.73729e-11	1.88411e-11	3.74318e-11	1.41246e-11	1.81519e-11	1.48558e-11	4.35602e-11	1.50516e-11	1.68887e-11	1.70163e-11	1.14076e-11	1.98389e-11	1.52332e-11	1.881e-11	2.98785e-11
2	1.35268e-11	1.78008e-11	2.40309e-11	1.62553e-11	1.7377e-11	1.88384e-11	3.74331e-11	1.41208e-11	1.8153e-11	1.4854e-11	4.35716e-11	1.50535e-11	1.68919e-11	1.70119e-11	1.14122e-11	1.98359e-11	1.52331e-11	1.88049e-11	2.98769e-11
2.02	1.35265e-11	1.77994e-11	2.40346e-11	1.62489e-11	1.73811e-11	1.88417e-11	3.74362e-11	1.41249e-11	1.81486e-11	1.48585e-11	4.35778e-11	1.50533e-11	1.68888e-11	1.70187e-11	1.14075e-11	1.98346e-11	1.5233e-11	1.88102e-11	2.98882e-11
2.04	1.35271e-11	1.77955e-11	2.40285e-11	1.62501e-11	1.73724e-11	1.88343e-11	3.74399e-11	1.41233e-11	1.81534e-11	1.48539e-11	4.35727e-11	1.50537e-11	1.6887e-11	1.70105e-11	1.14033e-11	1.98302e-11	1.52326e-11	1.88077e-11	2.98587e-11
2.06	1.35284e-11	1.78045e-11	2.40352e-11	1.62564e-11	1.73747e-11	1.88403e-11	3.74366e-11	1.41244e-11	1.81555e-11	1.48527e-11	4.35837e-11	1.50545e-11	1.68893e-11	1.70089e-11	1.14071e-11	1.98307e-11	1.52302e-11	1.88026e-11	2.98624e-11
2.08	1.35293e-11	1.78009e-11	2.40454e-11	1.62558e-11	1.73759e-11	1.88402e-11	3.74383e-11	1.41244e-11	1.81512e-11	1.48551e-11	4.35706e-11	1.50549e-11	1.68952e-11	1.70115e-11	1.14115e-11	1.98275e-11	1.52325e-11	1.88079e-11	2.98765e-11
2.1	1.35292e-11	1.78015e-11	2.40281e-11	1.62547e-11	1.73721e-11	1.88411e-11	3.74372e-11	1.4123e-11	1.81545e-11	1.48577e-11	4.35844e-11	1.50517e-11	1.68902e-11	1.7009e-11	1.14085e-11	1.98261e-11	1.52327e-11	1.88106e-11	2.98805e-11
2.12	1.35284e-11	1.77995e-11	2.40332e-11	1.62483e-11	1.737e-11	1.88397e-11	3.74398e-11	1.41219e-11	1.8149e-11	1.48587e-11	4.3575e-11	1.50549e-11	1.68911e-11	1.70148e-11	1.1409e-11	1.98284e-11	1.52375e-11	1.88144e-11	2.98749e-11
2.14	1.35303e-11	1.77928e-11	2.40323e-11	1.62565e-11	1.73763e-11	1.88361e-11	3.74346e-11	1.41285e-11	1.81482e-11	1.48568e-11	4.35719e-11	1.50565e-11	1.68932e-11	1.701e-11	1.14078e-11	1.98284e-11	1.52413e-11	1.88104e-11	2.9879e-11
2.16	1.35284e-11	1.77955e-11	2.40293e-11	1.62524e-11	1.73716e-11	1.88352e-11	3.7434e-11	1.41257e-11	1.815e-11	1.48526e-11	4.35811e-11	1.50553e-11	1.68892e-11	1.70111e-11	1.14081e-11	1.98285e-11	1.52375e-11	1.8806e-11	2.98734e-11
2.18	1.35301e-11	1.77958e-11	2.40355e-11	1.62501e-11	1.7373e-11	1.88408e-11	3.74373e-11	1.41292e-11	1.81497e-11	1.48593e-11	4.35724e-11	1.50482e-11	1.68865e-11	1.70073e-11	1.14088e-11	1.98243e-11	1.52377e-11	1.88089e-11	2.98698e-11
2.2	1.35284e-11	1.77969e-11	2.40366e-11	1.62533e-11	1.7378e-11	1.88393e-11	3.74346e-11	1.4133e-11	1.81507e-11	1.48554e-11	4.35734e-11	1.50501e-11	1.689e-11	1.70047e-11	1.1409e-11	1.98228e-11	1.52434e-11	1.88133e-11	2.9868e-11
2.22	1.35271e-11	1.78005e-11	2.40372e-11	1.62597e-11	1.73748e-11	1.88427e-11	3.74325e-11	1.41268e-11	1.81517e-11	1.48563e-11	4.35582e-11	1.50525e-11	1.68886e-11	1.70106e-11	1.14075e-11	1.98247e-11	1.52406e-11	1.88072e-11	2.98545e-11
2.24	1.3526e-11	1.77992e-11	2.40289e-11	1.62519e-11	1.73741e-11	1.88408e-11	3.7429e-11	1.41255e-11	1.81488e-11	1.48556e-11	4.35834e-11	1.50503e-11	1.68864e-11	1.70113e-11	1.14107e-11	1.98281e-11	1.52345e-11	1.88053e-11	2.9867e-11
2.26	1.35227e-11	1.77964e-11	2.40218e-11	1.62585e-11	1.73754e-11	1.88403e-11	3.74291e-11	1.41278e-11	1.81507e-11	1.48577e-11	4.35788e-11	1.50515e-11	1.68896e-11	1.70149e-11	1.14046e-11	1.98272e-11	1.52329e-11	1.88107e-11	2.98771e-11
2.28	1.35251e-11	1.78013e-11	2.40095e-11	1.62567e-11	1.73706e-11	1.88388e-11	3.74408e-11	1.41304e-11	1.81536e-11	1.48569e-11	4.35692e-11	1.50512e-11	1.68848e-11	1.7012e-11	1.14053e-11	1.98272e-11	1.52361e-11	1.88073e-11	2.98778e-11
2.3	1.35295e-11	1.78004e-11	2.40214e-11	1.62573e-11	1.73738e-11	1.88381e-11	3.74326e-11	1.41281e-11	1.81524e-11	1.48601e-11	4.35684e-11	1.50543e-11	1.68858e-11	1.70081e-11	1.14043e-11	1.98244e-11	1.52419e-11	1.8814e-11	2.98765e-11
2.32	1.35306e-11	1.77966e-11	2.40248e-11	1.62554e-11	1.73759e-11	1.88372e-11	3.74388e-11	1.41289e-11	1.81491e-11	1.48551e-11	4.35618e-11	1.50492e-11	1.6888e-11	1.70102e-11	1.14099e-11	1.98252e-11	1.52376e-11	1.88113e-11	2.98688e-11
2.34	1.35241e-11	1.77959e-11	2.40227e-11	1.62581e-11	1.73735e-11	1.8838e-11	3.74331e-11	1.41252e-11	1.81449e-11	1.4858e-11	4.35589e-11	1.50476e-11	1.68907e-11	1.70091e-11	1.14138e-11	1.98274e-11	1.52331e-11	1.87985e-11	2.98776e-11
2.36	1.35288e-11	1.77933e-11	2.40144e-11	1.62566e-11	1.73739e-11	1.88434e-11	3.74347e-11	1.41297e-11	1.8148e-11	1.48595e-11	4.35722e-11	1.50492e-11	1.68886e-11	1.70127e-11	1.14102e-11	1.98195e-11	1.52365e-11	1.88027e-11	2.98797e-11
2.38	1.35205e-11	1.77922e-11	2.40077e-11	1.62548e-11	1.73771e-11	1.88392e-11	3.74411e-11	1.41318e-11	1.81477e-11	1.48579e-11	4.35611e-11	1.50526e-11	1.68876e-11	1.70119e-11	1.14022e-11	1.98239e-11	1.52383e-11	1.88062e-11	2.98852e-11
2.4	1.3518e-11	1.77993e-11	2.40022e-11	1.62525e-11	1.7373e-11	1.88367e-11	3.7442e-11	1.41266e-11	1.81466e-11	1.486e-11	4.35604e-11	1.50529e-11	1.68893e-11	1.70111e-11	1.14129e-11	1.98299e-11	1.52361e-11	1.88101e-11	2.98777e-11
2.42	1.35217e-11	1.77898e-11	2.40241e-11	1.62523e-11	1.73709e-11	1.88371e-11	3.74318e-11	1.41256e-11	1.81437e-11	1.48559e-11	4.3581e-11	1.50507e-11	1.68906e-11	1.70151e-11	1.14112e-11	1.98236e-11	1.5237e-11	1.88066e-11	2.98798e-11
2.44	1.35182e-11	1.77915e-11	2.40223e-11	1.62623e-11	1.73824e-11	1.88337e-11	3.74302e-11	1.41326e-11	1.81477e-11	1.48566e-11	4.35854e-11	1.5052e-11	1.6888e-11	1.70085e-11	1.14071e-11	1.9826e-11	1.52432e-11	1.88081e-11	2.98598e-11
2.46	1.35241e-11	1.77925e-11	2.40198e-11	1.62542e-11	1.73698e-11	1.88411e-11	3.74299e-11	1.41363e-11	1.81429e-11	1.48605e-11	4.35731e-11	1.50491e-11	1.68861e-11	1.70086e-11	1.1409e-11	1.98242e-11	1.52358e-11	1.88094e-11	2.98834e-11
2.48	1.35231e-11	1.77871e-11	2.40377e-11	1.62552e-11	1.73702e-11	1.88363e-11	3.74344e-11	1.41294e-11	1.8147e-11	1.48529e-11	4.35746e-11	1.50467e-11	1.68858e-11	1.70065e-11	1.141e-11	1.98234e-11	1.5233e-11	1.88125e-11	2.988e-11
2.5	1.3522e-11	1.7792e-11	2.40145e-11	1.62568e-11	1.73795e-11	1.88425e-11	3.74347e-11	1.41377e-11	1.81448e-11	1.48595e-11	4.35688e-11	1.50534e-11	1.6892e-11	1.70056e-11	1.14103e-11	1.98271e-11	1.52389e-11	1.88121e-11	2.98638e-11
2.52	1.3517e-11	1.77933e-11	2.40151e-11	1.62496e-11	1.73726e-11	1.88403e-11	3.74364e-11	1.41371e-11	1.81448e-11	1.48583e-11	4.35701e-11	1.50502e-11	1.68882e-11	1.7011e-11	1.14106e-11	1.98266e-11	1.52376e-11	1.88125e-11	2.98739e-11
2.54	1.35158e-11	1.78004e-11	2.40204e-11	1.62581e-11	1.73727e-11	1.8839e-11	3.74315e-11	1.41334e-11	1.81438e-11	1.48566e-11	4.35884e-11	1.5044e-11	1.68925e-11	1.70087e-11	1.14116e-11	1.98227e-11	1.52418e-11	1.88114e-11	2.98837e-11
2.56	1.35215e-11	1.7799e-11	2.40149e-11	1.62547e-11	1.73723e-11	1.88407e-11	3.74318e-11	1.41224e-11	1.81461e-11	1.48613e-11	4.35692e-11	1.5048e-11	1.68924e-11	1.7012e-11	1.14052e-11	1.9823e-11	1.52344e-11	1.88112e-11	2.98866e-11
2.58	1.35203e-11	1.77977e-11	2.39963e-11	1.62555e-11	1.73718e-11	1.88444e-11	3.74401e-11	1.41328e-11	1.81438e-11	1.48531e-11	4.35729e-11	1.50488e-11	1.68906e-11	1.70132e-11	1.14046e-11	1.98275e-11	1.52436e-11	1.8801e-11	2.98924e-11
2.6	1.35246e-11	1.77977e-11	2.40089e-11	1.62522e-11	1.73668e-11	1.88406e-11	3.74375e-11	1.41354e-11	1.8146e-11	1.48564e-11	4.35708e-11	1.50484e-11	1.68958e-11	1.70135e-11	1.14103e-11	1.98218e-11	1.52413e-11	1.88082e-11	2.98895e-11
2.62	1.35261e-11	1.77899e-11	2.40142e-11	1.6254e-11	1.73758e-11	1.88408e-11	3.74376e-11	1.41324e-11	1.81461e-11	1.48568e-11	4.35728e-11	1.50527e-11	1.68881e-11	1.70148e-11	1.14079e-11	1.98193e-11	1.52365e-11	1.88113e-11	2.98953e-11
2.64	1.3527e-11	1.77961e-11	2.40066e-11	1.62559e-11	1.73755e-11	1.88416e-11	3.74328e-11	1.4134e-11	1.81449e-11	1.48581e-11	4.35754e-11	1.5051e-11	1.68927e-11	1.70178e-11	1.14126e-11	1.98255e-11	1.52395e-11	1.88063e-11	2.98907e-11
2.66	1.3529e-11	1.78023e-11	2.39959e-11	1.62526e-11	1.73777e-11	1.88448e-11	3.74326e-11	1.41371e-11	1.81457e-11	1.48545e-11	4.35708e-11	1.50462e-11	1.68936e-11	1.70173e-11	1.14102e-11	1.9823e-11	1.52399e-11	1.88094e-11	2.98644e-11
2.68	1.35211e-11	1.77919e-11	2.39896e-11	1.62604e-11	1.73727e-11	1.88412e-11	3.74355e-11	1.41384e-11	1.81421e-11	1.48549e-11	4.35567e-11	1.505e-11	1.68969e-11	1.70102e-11	1.14061e-11	1.98231e-11	1.52371e-11	1.88104e-11	2.98743e-11
2.7	1.3527e-11	1.77983e-11	2.40013e-11	1.62624e-11	1.73799e-11	1.88375e-11	3.74357e-11	1.4129e-11	1.81382e-11	1.48586e-11	4.35697e-11	1.5052e-11	1.68863e-11	1.70149e-11	1.14095e-11	1.98229e-11	1.5238e-11	1.8818e-11	2.98653e-11
2.72	1.35318e-11	1.77947e-11	2.39883e-11	1.6255e-11	1.7376e-11	1.88382e-11	3.74255e-11	1.41347e-11	1.81487e-11	1.4858e-11	4.35551e-11	1.50461e-11	1.68918e-11	1.70152e-11	1.14042e-11	1.98244e-11	1.52361e-11	1.88099e-11	2.98732e-11
2.74	1.35295e-11	1.77899e-11	2.3987e-11	1.62579e-11	1.73739e-11	1.88394e-11	3.74282e-11	1.4135e-11	1.81397e-11	1.48608e-11	4.3567e-11	1.50536e-11	1.68989e-11	1.70145e-11	1.1409e-11	1.98153e-11	1.52384e-11	1.88044e-11	2.98789e-11
2.76	1.35339e-11	1.78036e-11	2.39885e-11	1.62558e-11	1.73787e-11	1.88413e-11	3.74317e-11	1.413e-11	1.81453e-11	1.48545e-11	4.35504e-11	1.50452e-11	1.68908e-11	1.70158e-11	1.14149e-11	1.98217e-11	1.52358e-11	1.88071e-11	2.98744e-11
2.78	1.35264e-11	1.77941e-11	2.3996e-11	1.62557e-11	1.73766e-11	1.8838e-11	3.7429e-11	1.41351e-11	1.81457e-11	1.48617e-11	4.35619e-11	1.505e-11	1.68792e-11	1.70102e-11	1.14111e-11	1.98194e-11	1.52346e-11	1.88042e-11	2.98759e-11
2.8	1.35268e-11	1.7795e-11	2.39875e-11	1.62653e-11	1.73786e-11	1.88429e-11	3.74338e-11	1.41361e-11	1.81459e-11	1.48525e-11	4.35494e-11	1.50507e-11	1.68823e-11	1.70122e-11	1.14091e-11	1.98204e-11	1.52361e-11	1.88069e-11	2.98654e-11
2.82	1.35303e-11	1.7795e-11	2.40031e-11	1.62613e-11	1.73811e-11	1.88386e-11	3.74296e-11	1.41248e-11	1.81495e-11	1.48551e-11	4.35514e-11	1.50454e-11	1.68789e-11	1.70139e-11	1.14103e-11	1.98189e-11	1.5238e-11	1.88127e-11	2.98708e-11
2.84	1.35273e-11	1.77947e-11	2.39998e-11	1.62611e-11	1.7379e-11	1.88386e-11	3.74337e-11	1.4122e-11	1.81465e-11	1.48548e-11	4.357e-11	1.505e-11	1.68865e-11	1.70099e-11	1.14107e-11	1.9816e-11	1.52324e-11	1.88095e-11	2.98629e-11
2.86	1.35239e-11	1.77999e-11	2.4009e-11	1.62625e-11	1.7376e-11	1.88431e-11	3.74305e-11	1.412e-11	1.81454e-11	1.48573e-11	4.35575e-11	1.50443e-11	1.68812e-11	1.70133e-11	1.14124e-11	1.98178e-11	1.52287e-11	1.88081e-11	2.98701e-11
2.88	1.35295e-11	1.77973e-11	2.39925e-11	1.62604e-11	1.73781e-11	1.88396e-11	3.74281e-11	1.41249e-11	1.81432e-11	1.4858e-11	4.3542e-11	1.50464e-11	1.68738e-11	1.70142e-11	1.14075e-11	1.98134e-11	1.52315e-11	1.88101e-11	2.98648e-11
2.9	1.35306e-11	1.77924e-11	2.39904e-11	1.62607e-11	1.73797e-11	1.8838e-11	3.74298e-11	1.41275e-11	1.815e-11	1.48585e-11	4.35515e-11	1.5046e-11	1.68791e-11	1.7016e-11	1.14126e-11	1.98062e-11	1.52391e-11	1.88124e-11	2.98677e-11
2.92	1.35313e-11	1.77948e-11	2.40104e-11	1.62572e-11	1.73766e-11	1.88373e-11	3.74284e-11	1.41291e-11	1.8143e-11	1.48616e-11	4.3553e-11	1.50434e-11	1.68816e-11	1.70123e-11	1.14194e-11	1.98117e-11	1.52383e-11	1.88075e-11	2.98617e-11
2.94	1.35237e-11	1.77926e-11	2.40002e-11	1.62563e-11	1.73756e-11	1.88462e-11	3.743e-11	1.41211e-11	1.81448e-11	1.48589e-11	4.35439e-11	1.50423e-11	1.68816e-11	1.70165e-11	1.14118e-11	1.98072e-11	1.52387e-11	1.88148e-11	2.98708e-11
2.96	1.35341e-11	1.77943e-11	2.40226e-11	1.6258e-11	1.73699e-11	1.88301e-11	3.74245e-11	1.41254e-11	1.81482e-11	1.48541e-11	4.35553e-11	1.50452e-11	1.68825e-11	1.70186e-11	1.14151e-11	1.9812e-11	1.52388e-11	1.8812e-11	2.98578e-11
2.98	1.353e-11	1.77905e-11	2.40138e-11	1.62591e-11	1.73697e-11	1.88281e-11	3.74318e-11	1.41225e-11	1.81433e-11	1.48528e-11	4.35528e-11	1.50469e-11	1.68802e-11	1.70134e-11	1.1413e-11	1.9809e-11	1.52417e-11	1.88124e-11	2.98651e-11
3	1.35258e-11	1.77913e-11	2.40071e-11	1.62561e-11	1.7376e-11	1.88235e-11	3.74309e-11	1.41298e-11	1.81409e-11	1.48568e-11	4.35499e-11	1.50469e-11	1.68798e-11	1.70184e-11	1.14101e-11	1.98069e-11	1.52406e-11	1.88079e-11	2.9861e-11
3.02	1.35225e-11	1.77991e-11	2.40197e-11	1.62545e-11	1.73783e-11	1.88363e-11	3.74351e-11	1.41286e-11	1.81422e-11	1.48553e-11	4.35464e-11	1.50485e-11	1.68796e-11	1.70143e-11	1.14142e-11	1.98079e-11	1.52314e-11	1.8814e-11	2.98579e-11
3.04	1.35312e-11	1.77922e-11	2.40111e-11	1.62547e-11	1.73772e-11	1.88436e-11	3.74365e-11	1.4134e-11	1.81472e-11	1.48588e-11	4.3557e-11	1.50426e-11	1.68854e-11	1.70126e-11	1.14138e-11	1.98002e-11	1.5236e-11	1.88152e-11	2.98647e-11
3.06	1.35345e-11	1.77926e-11	2.4006e-11	1.62572e-11	1.73775e-11	1.88388e-11	3.74271e-11	1.41263e-11	1.8147e-11	1.48537e-11	4.35592e-11	1.50489e-11	1.6879e-11	1.70186e-11	1.14107e-11	1.98084e-11	1.52369e-11	1.88079e-11	2.98573e-11
3.08	1.35312e-11	1.77927e-11	2.40258e-11	1.62595e-11	1.73782e-11	1.8844e-11	3.74235e-11	1.41249e-11	1.81507e-11	1.4858e-11	4.35495e-11	1.50461e-11	1.68841e-11	1.70171e-11	1.14061e-11	1.98086e-11	1.52357e-11	1.88111e-11	2.98685e-11
3.1	1.35353e-11	1.77925e-11	2.40156e-11	1.62571e-11	1.73772e-11	1.88391e-11	3.74206e-11	1.41265e-11	1.8151e-11	1.48565e-11	4.35441e-11	1.50463e-11	1.68816e-11	1.70165e-11	1.13943e-11	1.9805e-11	1.52344e-11	1.8809e-11	2.98537e-11
3.12	1.35319e-11	1.77958e-11	2.40122e-11	1.62618e-11	1.73737e-11	1.88392e-11	3.7418e-11	1.41241e-11	1.81467e-11	1.48578e-11	4.35543e-11	1.50422e-11	1.68823e-11	1.70214e-11	1.13502e-11	1.98121e-11	1.52318e-11	1.88076e-11	2.98629e-11
3.14	1.3534e-11	1.77947e-11	2.40218e-11	1.62578e-11	1.73771e-11	1.88399e-11	3.74232e-11	1.41237e-11	1.8148e-11	1.48585e-11	4.35759e-11	1.50452e-11	1.68769e-11	1.70153e-11	1.13261e-11	1.98105e-11	1.52306e-11	1.88126e-11	2.98685e-11
3.16	1.35232e-11	1.7785e-11	2.40275e-11	1.62589e-11	1.73706e-11	1.88433e-11	3.74212e-11	1.41159e-11	1.81465e-11	1.48599e-11	4.35489e-11	1.50391e-11	1.68819e-11	1.70193e-11	1.13178e-11	1.98126e-11	1.52343e-11	1.88093e-11	2.98759e-11
3.18	1.35257e-11	1.77892e-11	2.40219e-11	1.62541e-11	1.73693e-11	1.88369e-11	3.74249e-11	1.41247e-11	1.81424e-11	1.48522e-11	4.35391e-11	1.50461e-11	1.68817e-11	1.70213e-11	1.13155e-11	1.98073e-11	1.5235e-11	1.88159e-11	2.98618e-11
3.2	1.35274e-11	1.77891e-11	2.40232e-11	1.62594e-11	1.73765e-11	1.88365e-11	3.7419e-11	1.41245e-11	1.81478e-11	1.48532e-11	4.35472e-11	1.504e-11	1.68796e-11	1.70137e-11	1.1316e-11	1.98056e-11	1.52351e-11	1.88181e-11	2.98606e-11
3.22	1.3526e-11	1.77985e-11	2.40327e-11	1.62565e-11	1.73727e-11	1.88424e-11	3.74167e-11	1.41224e-11	1.81503e-11	1.48606e-11	4.3547e-11	1.5043e-11	1.68784e-11	1.703e-11	1.13082e-11	1.98104e-11	1.52367e-11	1.88138e-11	2.98561e-11
3.24	1.35229e-11	1.77903e-11	2.40198e-11	1.62606e-11	1.73733e-11	1.8842e-11	3.74145e-11	1.41259e-11	1.81491e-11	1.48574e-11	4.35466e-11	1.50425e-11	1.68888e-11	1.70244e-11	1.13172e-11	1.9808e-11	1.52423e-11	1.8817e-11	2.98569e-11
3.26	1.35305e-11	1.77895e-11	2.4033e-11	1.62593e-11	1.7382e-11	1.88436e-11	3.74219e-11	1.41223e-11	1.81474e-11	1.4861e-11	4.35387e-11	1.50427e-11	1.68794e-11	1.70261e-11	1.13179e-11	1.98116e-11	1.52372e-11	1.88129e-11	2.98566e-11
3.28	1.3533e-11	1.77908e-11	2.40108e-11	1.62571e-11	1.73719e-11	1.88345e-11	3.74195e-11	1.41212e-11	1.81474e-11	1.48595e-11	4.35402e-11	1.50385e-11	1.68815e-11	1.70263e-11	1.132e-11	1.98089e-11	1.52341e-11	1.88154e-11	2.98661e-11
3.3	1.35253e-11	1.77905e-11	2.40138e-11	1.62586e-11	1.7378e-11	1.88429e-11	3.74278e-11	1.41201e-11	1.81453e-11	1.48581e-11	4.35382e-11	1.50409e-11	1.68802e-11	1.70214e-11	1.13246e-11	1.98063e-11	1.5238e-11	1.88163e-11	2.9868e-11
3.32	1.35318e-11	1.77841e-11	2.40267e-11	1.6255e-11	1.73798e-11	1.88435e-11	3.74235e-11	1.41272e-11	1.81489e-11	1.48577e-11	4.35333e-11	1.50371e-11	1.68801e-11	1.70238e-11	1.13289e-11	1.98146e-11	1.5241e-11	1.88101e-11	2.98563e-11
3.34	1.35331e-11	1.77914e-11	2.40234e-11	1.62602e-11	1.73772e-11	1.88474e-11	3.74229e-11	1.41255e-11	1.81481e-11	1.48573e-11	4.35432e-11	1.50406e-11	1.68767e-11	1.70215e-11	1.13302e-11	1.98119e-11	1.52371e-11	1.88128e-11	2.98505e-11
3.36	1.35348e-11	1.77893e-11	2.40161e-11	1.626e-11	1.73727e-11	1.88397e-11	3.74218e-11	1.41255e-11	1.81454e-11	1.48547e-11	4.35624e-11	1.50382e-11	1.68827e-11	1.70324e-11	1.13318e-11	1.98072e-11	1.52377e-11	1.88146e-11	2.98521e-11
3.38	1.35315e-11	1.7787e-11	2.4014e-11	1.62597e-11	1.73727e-11	1.88429e-11	3.74205e-11	1.41276e-11	1.81501e-11	1.48621e-11	4.35527e-11	1.50411e-11	1.68927e-11	1.70197e-11	1.13346e-11	1.98106e-11	1.52399e-11	1.88104e-11	2.98478e-11
3.4	1.35298e-11	1.7781e-11	2.40156e-11	1.62632e-11	1.73787e-11	1.88444e-11	3.74249e-11	1.41137e-11	1.81495e-11	1.48547e-11	4.35521e-11	1.50368e-11	1.68851e-11	1.70163e-11	1.13429e-11	1.98163e-11	1.52344e-11	1.88136e-11	2.9841e-11
3.42	1.35299e-11	1.77918e-11	2.40098e-11	1.62611e-11	1.73696e-11	1.88434e-11	3.74238e-11	1.41241e-11	1.81507e-11	1.48613e-11	4.35479e-11	1.50374e-11	1.68802e-11	1.70258e-11	1.1344e-11	1.98121e-11	1.52378e-11	1.88173e-11	2.98549e-11
3.44	1.35311e-11	1.77933e-11	2.40105e-11	1.62605e-11	1.7375e-11	1.8844e-11	3.7429e-11	1.4126e-11	1.81491e-11	1.48577e-11	4.35594e-11	1.50366e-11	1.68812e-11	1.70205e-11	1.13413e-11	1.98092e-11	1.5234e-11	1.88212e-11	2.98389e-11
3.46	1.35269e-11	1.7792e-11	2.40125e-11	1.62554e-11	1.73726e-11	1.88411e-11	3.74265e-11	1.41259e-11	1.81469e-11	1.48562e-11	4.35259e-11	1.50338e-11	1.68761e-11	1.70198e-11	1.1338e-11	1.98112e-11	1.52344e-11	1.88173e-11	2.98469e-11
3.48	1.35352e-11	1.77883e-11	2.40319e-11	1.62585e-11	1.73761e-11	1.88453e-11	3.74183e-11	1.41317e-11	1.81477e-11	1.486e-11	4.35555e-11	1.50379e-11	1.68861e-11	1.70242e-11	1.13361e-11	1.98176e-11	1.52344e-11	1.88145e-11	2.98432e-11
3.5	1.35329e-11	1.77886e-11	2.40243e-11	1.62639e-11	1.73724e-11	1.88408e-11	3.7421e-11	1.41192e-11	1.815e-11	1.48617e-11	4.35507e-11	1.50402e-11	1.68746e-11	1.70184e-11	1.13413e-11	1.98109e-11	1.52294e-11	1.88145e-11	2.98385e-11
3.52	1.35335e-11	1.78002e-11	2.40335e-11	1.62586e-11	1.73729e-11	1.88435e-11	3.74256e-11	1.41215e-11	1.81512e-11	1.48654e-11	4.35513e-11	1.50338e-11	1.68816e-11	1.702e-11	1.13389e-11	1.98107e-11	1.5236e-11	1.88176e-11	2.98411e-11
3.54	1.35329e-11	1.77842e-11	2.40256e-11	1.6257e-11	1.73729e-11	1.88401e-11	3.74166e-11	1.41264e-11	1.81512e-11	1.48589e-11	4.35514e-11	1.50396e-11	1.68867e-11	1.70203e-11	1.13426e-11	1.98149e-11	1.52285e-11	1.88104e-11	2.9846e-11
3.56	1.35306e-11	1.77941e-11	2.40381e-11	1.62594e-11	1.73814e-11	1.88366e-11	3.74228e-11	1.41212e-11	1.81456e-11	1.48646e-11	4.35454e-11	1.50342e-11	1.68822e-11	1.70244e-11	1.13365e-11	1.98125e-11	1.52338e-11	1.88118e-11	2.98484e-11
3.58	1.35322e-11	1.77896e-11	2.40265e-11	1.6263e-11	1.73732e-11	1.88412e-11	3.74312e-11	1.41263e-11	1.81484e-11	1.48595e-11	4.35452e-11	1.50383e-11	1.68846e-11	1.70223e-11	1.13373e-11	1.98122e-11	1.52311e-11	1.88212e-11	2.98342e-11
3.6	1.3533e-11	1.7791e-11	2.40255e-11	1.62586e-11	1.73789e-11	1.88434e-11	3.74275e-11	1.41239e-11	1.81439e-11	1.48607e-11	4.35541e-11	1.50256e-11	1.68798e-11	1.70282e-11	1.13375e-11	1.98108e-11	1.52292e-11	1.88185e-11	2.98368e-11
3.62	1.35324e-11	1.77889e-11	2.40179e-11	1.62551e-11	1.73762e-11	1.88478e-11	3.74246e-11	1.41235e-11	1.81461e-11	1.48616e-11	4.35403e-11	1.50335e-11	1.68807e-11	1.70255e-11	1.13362e-11	1.98172e-11	1.52286e-11	1.88163e-11	2.98436e-11
3.64	1.35303e-11	1.77923e-11	2.40223e-11	1.62609e-11	1.73815e-11	1.88433e-11	3.74197e-11	1.41206e-11	1.81481e-11	1.48613e-11	4.35265e-11	1.5039e-11	1.68857e-11	1.70282e-11	1.134e-11	1.98126e-11	1.52295e-11	1.88153e-11	2.98574e-11
3.66	1.35303e-11	1.7787e-11	2.40181e-11	1.62599e-11	1.73749e-11	1.88434e-11	3.74223e-11	1.41237e-11	1.81528e-11	1.48592e-11	4.35387e-11	1.50312e-11	1.68831e-11	1.70222e-11	1.13388e-11	1.98123e-11	1.52315e-11	1.88124e-11	2.98447e-11
3.68	1.35317e-11	1.77943e-11	2.40243e-11	1.62557e-11	1.73765e-11	1.8842e-11	3.74255e-11	1.41183e-11	1.81514e-11	1.48654e-11	4.35337e-11	1.50354e-11	1.68843e-11	1.7026e-11	1.13364e-11	1.98146e-11	1.52359e-11	1.88135e-11	2.98468e-11
3.7	1.35304e-11	1.77835e-11	2.40115e-11	1.62528e-11	1.73798e-11	1.8839e-11	3.7425e-11	1.41199e-11	1.81511e-11	1.48605e-11	4.35478e-11	1.50339e-11	1.68852e-11	1.70257e-11	1.13352e-11	1.98141e-11	1.52314e-11	1.88102e-11	2.98445e-11
3.72	1.35345e-11	1.77927e-11	2.4034e-11	1.62551e-11	1.73766e-11	1.88488e-11	3.7424e-11	1.41266e-11	1.81468e-11	1.48581e-11	4.35508e-11	1.5032e-11	1.68826e-11	1.70257e-11	1.13365e-11	1.98102e-11	1.52355e-11	1.88138e-11	2.9851e-11
3.74	1.35342e-11	1.77884e-11	2.40409e-11	1.6259e-11	1.73777e-11	1.8846e-11	3.74195e-11	1.41337e-11	1.81515e-11	1.48666e-11	4.35343e-11	1.50308e-11	1.68865e-11	1.70248e-11	1.13349e-11	1.98137e-11	1.52353e-11	1.88242e-11	2.98505e-11
3.76	1.35325e-11	1.77907e-11	2.40334e-11	1.62613e-11	1.73735e-11	1.88487e-11	3.7412e-11	1.4137e-11	1.81524e-11	1.4866e-11	4.35414e-11	1.50337e-11	1.68814e-11	1.70239e-11	1.13355e-11	1.98135e-11	1.52278e-11	1.88173e-11	2.98494e-11
3.78	1.35334e-11	1.77868e-11	2.40371e-11	1.6263e-11	1.73745e-11	1.88458e-11	3.7414e-11	1.41306e-11	1.81531e-11	1.48602e-11	4.35407e-11	1.50284e-11	1.68789e-11	1.70269e-11	1.13312e-11	1.98115e-11	1.52378e-11	1.88132e-11	2.98624e-11
3.8	1.35264e-11	1.77931e-11	2.40187e-11	1.62565e-11	1.73731e-11	1.88409e-11	3.7421e-11	1.41313e-11	1.81494e-11	1.48614e-11	4.35336e-11	1.50302e-11	1.68821e-11	1.70313e-11	1.13399e-11	1.98129e-11	1.52331e-11	1.88204e-11	2.98552e-11
3.82	1.35295e-11	1.77911e-11	2.40182e-11	1.62587e-11	1.73701e-11	1.88402e-11	3.74216e-11	1.4133e-11	1.81458e-11	1.48645e-11	4.35436e-11	1.50364e-11	1.68876e-11	1.70236e-11	1.13348e-11	1.98153e-11	1.52386e-11	1.88219e-11	2.98508e-11
3.84	1.35322e-11	1.77889e-11	2.40209e-11	1.62591e-11	1.73782e-11	1.88425e-11	3.74245e-11	1.41356e-11	1.81493e-11	1.48601e-11	4.35548e-11	1.5029e-11	1.68815e-11	1.70216e-11	1.13387e-11	1.98215e-11	1.5234e-11	1.88182e-11	2.98525e-11
3.86	1.35314e-11	1.77883e-11	2.40191e-11	1.62602e-11	1.73763e-11	1.88413e-11	3.74253e-11	1.41368e-11	1.81427e-11	1.48612e-11	4.35573e-11	1.50276e-11	1.68846e-11	1.70311e-11	1.13326e-11	1.98104e-11	1.52319e-11	1.88261e-11	2.98581e-11
3.88	1.35284e-11	1.77916e-11	2.40213e-11	1.62621e-11	1.73734e-11	1.88467e-11	3.74189e-11	1.41273e-11	1.81503e-11	1.48563e-11	4.35542e-11	1.50304e-11	1.68775e-11	1.70251e-11	1.13352e-11	1.98131e-11	1.52347e-11	1.88207e-11	2.9853e-11
3.9	1.3528e-11	1.77904e-11	2.40111e-11	1.62563e-11	1.73761e-11	1.88441e-11	3.7415e-11	1.41434e-11	1.81433e-11	1.48611e-11	4.35524e-11	1.50281e-11	1.68819e-11	1.70327e-11	1.1331e-11	1.98059e-11	1.52341e-11	1.88197e-11	2.98504e-11
3.92	1.35287e-11	1.77867e-11	2.40278e-11	1.62618e-11	1.73709e-11	1.88389e-11	3.74265e-11	1.41504e-11	1.81504e-11	1.48649e-11	4.35421e-11	1.503e-11	1.68826e-11	1.70274e-11	1.13318e-11	1.98114e-11	1.52401e-11	1.88244e-11	2.98661e-11
3.94	1.3526e-11	1.77919e-11	2.40346e-11	1.62612e-11	1.73699e-11	1.88466e-11	3.74217e-11	1.41491e-11	1.8146e-11	1.48603e-11	4.35389e-11	1.50247e-11	1.68847e-11	1.70275e-11	1.13324e-11	1.98116e-11	1.52414e-11	1.88236e-11	2.98756e-11
3.96	1.3531e-11	1.77866e-11	2.40365e-11	1.6261e-11	1.7372e-11	1.88482e-11	3.74219e-11	1.41446e-11	1.81452e-11	1.48624e-11	4.35309e-11	1.50255e-11	1.68785e-11	1.70234e-11	1.13307e-11	1.98116e-11	1.5236e-11	1.88165e-11	2.98934e-11
3.98	1.35353e-11	1.77924e-11	2.40306e-11	1.6259e-11	1.73715e-11	1.88465e-11	3.74297e-11	1.41463e-11	1.81468e-11	1.48615e-11	4.35411e-11	1.50311e-11	1.68782e-11	1.70287e-11	1.13309e-11	1.9816e-11	1.52382e-11	1.88226e-11	2.98771e-11
4	1.35324e-11	1.77875e-11	2.40234e-11	1.62612e-11	1.73714e-11	1.8841e-11	3.7424e-11	1.41478e-11	1.8147e-11	1.48598e-11	4.35547e-11	1.50318e-11	1.68853e-11	1.70273e-11	1.13335e-11	1.98133e-11	1.52339e-11	1.88199e-11	2.98963e-11
4.02	1.35338e-11	1.77924e-11	2.40155e-11	1.62609e-11	1.73758e-11	1.88443e-11	3.74297e-11	1.41478e-11	1.81508e-11	1.48622e-11	4.35197e-11	1.50286e-11	1.68791e-11	1.70251e-11	1.13311e-11	1.98133e-11	1.52336e-11	1.8816e-11	2.98812e-11
4.04	1.35308e-11	1.77841e-11	2.40038e-11	1.62624e-11	1.73698e-11	1.88408e-11	3.74262e-11	1.41444e-11	1.81498e-11	1.48618e-11	4.35618e-11	1.50265e-11	1.68783e-11	1.70282e-11	1.13318e-11	1.98112e-11	1.52318e-11	1.88158e-11	2.98904e-11
4.06	1.35327e-11	1.77942e-11	2.40195e-11	1.62628e-11	1.73724e-11	1.88447e-11	3.74182e-11	1.41481e-11	1.81494e-11	1.48633e-11	4.35516e-11	1.50306e-11	1.68807e-11	1.70253e-11	1.13315e-11	1.98172e-11	1.52363e-11	1.88145e-11	2.98482e-11
4.08	1.3533e-11	1.7787e-11	2.40199e-11	1.62609e-11	1.73768e-11	1.88381e-11	3.74259e-11	1.41507e-11	1.81462e-11	1.48569e-11	4.35369e-11	1.50278e-11	1.68858e-11	1.70291e-11	1.13353e-11	1.98151e-11	1.52384e-11	1.88173e-11	2.97835e-11
4.1	1.35309e-11	1.77823e-11	2.40007e-11	1.62627e-11	1.73724e-11	1.88446e-11	3.74164e-11	1.41465e-11	1.81484e-11	1.48626e-11	4.35339e-11	1.50273e-11	1.68798e-11	1.70244e-11	1.13296e-11	1.98135e-11	1.52301e-11	1.88203e-11	2.96929e-11
4.12	1.35288e-11	1.77867e-11	2.40275e-11	1.62566e-11	1.73753e-11	1.88509e-11	3.74213e-11	1.41461e-11	1.81475e-11	1.48633e-11	4.35464e-11	1.50268e-11	1.68769e-11	1.70256e-11	1.13265e-11	1.98149e-11	1.52337e-11	1.88174e-11	2.9552e-11
4.14	1.353e-11	1.77922e-11	2.40278e-11	1.62658e-11	1.73785e-11	1.88475e-11	3.74228e-11	1.41475e-11	1.81544e-11	1.48635e-11	4.35481e-11	1.50255e-11	1.68792e-11	1.7022e-11	1.13273e-11	1.98165e-11	1.52409e-11	1.88196e-11	2.94599e-11
4.16	1.3528e-11	1.77862e-11	2.40333e-11	1.62584e-11	1.73761e-11	1.88409e-11	3.74243e-11	1.41497e-11	1.81537e-11	1.48615e-11	4.35419e-11	1.50209e-11	1.68757e-11	1.70264e-11	1.13304e-11	1.98167e-11	1.5242e-11	1.8823e-11	2.94069e-11
4.18	1.35299e-11	1.77861e-11	2.40378e-11	1.62636e-11	1.7374e-11	1.88449e-11	3.74186e-11	1.41489e-11	1.81486e-11	1.48625e-11	4.35481e-11	1.50241e-11	1.68753e-11	1.70283e-11	1.13294e-11	1.98154e-11	1.52403e-11	1.8817e-11	2.93544e-11
4.2	1.35298e-11	1.77865e-11	2.403e-11	1.62584e-11	1.73738e-11	1.88454e-11	3.74215e-11	1.41432e-11	1.81463e-11	1.4864e-11	4.35528e-11	1.50235e-11	1.68773e-11	1.70312e-11	1.13278e-11	1.98187e-11	1.52362e-11	1.88154e-11	2.9329e-11
4.22	1.35252e-11	1.77878e-11	2.40301e-11	1.62617e-11	1.73727e-11	1.8843e-11	3.74252e-11	1.41448e-11	1.8147e-11	1.48581e-11	4.35452e-11	1.50191e-11	1.68753e-11	1.70267e-11	1.13224e-11	1.98191e-11	1.52429e-11	1.88181e-11	2.93041e-11
4.24	1.35291e-11	1.7783e-11	2.40324e-11	1.62555e-11	1.73741e-11	1.88418e-11	3.74208e-11	1.41514e-11	1.81491e-11	1.48657e-11	4.35514e-11	1.50214e-11	1.6878e-11	1.70298e-11	1.13256e-11	1.98186e-11	1.5237e-11	1.88177e-11	2.92806e-11
4.26	1.35288e-11	1.77927e-11	2.40419e-11	1.6256e-11	1.73761e-11	1.88455e-11	3.74214e-11	1.41494e-11	1.81481e-11	1.48675e-11	4.35237e-11	1.50216e-11	1.68791e-11	1.70218e-11	1.13246e-11	1.98122e-11	1.52354e-11	1.88121e-11	2.92615e-11
4.28	1.35299e-11	1.77875e-11	2.4027e-11	1.62615e-11	1.73704e-11	1.88498e-11	3.74128e-11	1.41464e-11	1.81479e-11	1.48603e-11	4.35457e-11	1.50255e-11	1.6877e-11	1.70298e-11	1.13285e-11	1.98208e-11	1.52381e-11	1.88179e-11	2.92346e-11
4.3	1.35292e-11	1.77917e-11	2.4028e-11	1.62592e-11	1.73769e-11	1.88377e-11	3.74171e-11	1.4148e-11	1.81484e-11	1.48619e-11	4.35509e-11	1.50228e-11	1.68739e-11	1.70335e-11	1.13308e-11	1.98164e-11	1.524e-11	1.8817e-11	2.92411e-11
4.32	1.35339e-11	1.77921e-11	2.40297e-11	1.62591e-11	1.73763e-11	1.88482e-11	3.74158e-11	1.41466e-11	1.81479e-11	1.4863e-11	4.35489e-11	1.50267e-11	1.68776e-11	1.70301e-11	1.13277e-11	1.98113e-11	1.52421e-11	1.88166e-11	2.92353e-11
4.34	1.35334e-11	1.77852e-11	2.40352e-11	1.62605e-11	1.73741e-11	1.88429e-11	3.7415e-11	1.41431e-11	1.81496e-11	1.48617e-11	4.35456e-11	1.50152e-11	1.68702e-11	1.70263e-11	1.13305e-11	1.98165e-11	1.52381e-11	1.88152e-11	2.92309e-11
4.36	1.35296e-11	1.77867e-11	2.40573e-11	1.6257e-11	1.73687e-11	1.88458e-11	3.7413e-11	1.4144e-11	1.81573e-11	1.48606e-11	4.3554e-11	1.5021e-11	1.68719e-11	1.70214e-11	1.1329e-11	1.98145e-11	1.52411e-11	1.88198e-11	2.92232e-11
4.38	1.35291e-11	1.77847e-11	2.40394e-11	1.62563e-11	1.73711e-11	1.88436e-11	3.74105e-11	1.41435e-11	1.81615e-11	1.48636e-11	4.35564e-11	1.50206e-11	1.68725e-11	1.70263e-11	1.13253e-11	1.98149e-11	1.52424e-11	1.88176e-11	2.92119e-11
4.4	1.35304e-11	1.77959e-11	2.40406e-11	1.62641e-11	1.73743e-11	1.88483e-11	3.74143e-11	1.41444e-11	1.81626e-11	1.48592e-11	4.35424e-11	1.50235e-11	1.68702e-11	1.70232e-11	1.13235e-11	1.98137e-11	1.52371e-11	1.88213e-11	2.92085e-11
4.42	1.35296e-11	1.77855e-11	2.40421e-11	1.62586e-11	1.73725e-11	1.88471e-11	3.7419e-11	1.41395e-11	1.81661e-11	1.48597e-11	4.35473e-11	1.50218e-11	1.68704e-11	1.70182e-11	1.13258e-11	1.98167e-11	1.52413e-11	1.88192e-11	2.92053e-11
4.44	1.35331e-11	1.77845e-11	2.40275e-11	1.6257e-11	1.7374e-11	1.88413e-11	3.74182e-11	1.41471e-11	1.81653e-11	1.48603e-11	4.35498e-11	1.50154e-11	1.68743e-11	1.70246e-11	1.13229e-11	1.98205e-11	1.52331e-11	1.8819e-11	2.91935e-11
4.46	1.35315e-11	1.77894e-11	2.40352e-11	1.62561e-11	1.73787e-11	1.88447e-11	3.74161e-11	1.41493e-11	1.81634e-11	1.48589e-11	4.35564e-11	1.50231e-11	1.68716e-11	1.70224e-11	1.13244e-11	1.98175e-11	1.52397e-11	1.88146e-11	2.92003e-11
4.48	1.35358e-11	1.77864e-11	2.40374e-11	1.62582e-11	1.7375e-11	1.88447e-11	3.74252e-11	1.41468e-11	1.81602e-11	1.48586e-11	4.3551e-11	1.502e-11	1.6869e-11	1.70249e-11	1.13217e-11	1.98152e-11	1.52381e-11	1.88229e-11	2.92029e-11
4.5	1.35294e-11	1.77828e-11	2.40301e-11	1.62556e-11	1.73785e-11	1.88449e-11	3.74147e-11	1.4143e-11	1.81611e-11	1.48576e-11	4.35657e-11	1.50178e-11	1.68731e-11	1.7024e-11	1.13241e-11	1.98192e-11	1.52411e-11	1.88185e-11	2.91768e-11
4.52	1.35273e-11	1.77868e-11	2.40203e-11	1.62533e-11	1.73716e-11	1.88525e-11	3.74253e-11	1.41423e-11	1.81604e-11	1.48638e-11	4.35498e-11	1.5023e-11	1.68731e-11	1.7025e-11	1.13246e-11	1.98106e-11	1.52355e-11	1.88234e-11	2.91832e-11
4.54	1.35301e-11	1.77861e-11	2.40186e-11	1.62573e-11	1.7377e-11	1.88411e-11	3.74263e-11	1.41443e-11	1.81446e-11	1.48563e-11	4.3563e-11	1.50188e-11	1.68703e-11	1.70302e-11	1.13258e-11	1.98194e-11	1.5235e-11	1.88163e-11	2.91735e-11
4.56	1.35343e-11	1.77879e-11	2.40336e-11	1.62612e-11	1.73753e-11	1.8844e-11	3.74256e-11	1.41471e-11	1.81485e-11	1.48617e-11	4.35612e-11	1.50184e-11	1.6873e-11	1.70241e-11	1.1323e-11	1.9813e-11	1.52389e-11	1.8817e-11	2.9188e-11
4.58	1.35338e-11	1.77924e-11	2.40282e-11	1.62518e-11	1.73761e-11	1.88454e-11	3.74206e-11	1.41423e-11	1.81484e-11	1.48628e-11	4.35523e-11	1.502e-11	1.68747e-11	1.70196e-11	1.13241e-11	1.98177e-11	1.52374e-11	1.88228e-11	2.91729e-11
4.6	1.35373e-11	1.7783e-11	2.40356e-11	1.62623e-11	1.73695e-11	1.88429e-11	3.74206e-11	1.41457e-11	1.81466e-11	1.48647e-11	4.35583e-11	1.50172e-11	1.68699e-11	1.70233e-11	1.13218e-11	1.98196e-11	1.52339e-11	1.88153e-11	2.91824e-11
4.62	1.35354e-11	1.77869e-11	2.40382e-11	1.62608e-11	1.73741e-11	1.88399e-11	3.74154e-11	1.41446e-11	1.81536e-11	1.48627e-11	4.35538e-11	1.50184e-11	1.68753e-11	1.70256e-11	1.13259e-11	1.98181e-11	1.5238e-11	1.88192e-11	2.91813e-11
4.64	1.3537e-11	1.77827e-11	2.40185e-11	1.62596e-11	1.73771e-11	1.88451e-11	3.74151e-11	1.41457e-11	1.81459e-11	1.48605e-11	4.35639e-11	1.50144e-11	1.68691e-11	1.70257e-11	1.13259e-11	1.98197e-11	1.52353e-11	1.88185e-11	2.91695e-11
4.66	1.35306e-11	1.77908e-11	2.402e-11	1.62552e-11	1.73744e-11	1.88455e-11	3.74218e-11	1.4147e-11	1.81481e-11	1.48643e-11	4.35508e-11	1.50164e-11	1.68711e-11	1.70261e-11	1.13237e-11	1.98186e-11	1.52398e-11	1.88217e-11	2.91645e-11
4.68	1.35338e-11	1.77912e-11	2.40166e-11	1.62636e-11	1.73756e-11	1.88455e-11	3.74296e-11	1.4149e-11	1.81427e-11	1.48589e-11	4.3556e-11	1.50184e-11	1.6871e-11	1.70241e-11	1.13194e-11	1.98226e-11	1.52286e-11	1.882e-11	2.91748e-11
4.7	1.35371e-11	1.77923e-11	2.40091e-11	1.62606e-11	1.73794e-11	1.88428e-11	3.74306e-11	1.41462e-11	1.81459e-11	1.4863e-11	4.35776e-11	1.50169e-11	1.68715e-11	1.70252e-11	1.13213e-11	1.98182e-11	1.52391e-11	1.88227e-11	2.91735e-11
4.72	1.35328e-11	1.77898e-11	2.39986e-11	1.62553e-11	1.73745e-11	1.88442e-11	3.74208e-11	1.41467e-11	1.81505e-11	1.48584e-11	4.35523e-11	1.50188e-11	1.68696e-11	1.70175e-11	1.13299e-11	1.98207e-11	1.52362e-11	1.88205e-11	2.91614e-11
4.74	1.35388e-11	1.77859e-11	2.40085e-11	1.62565e-11	1.73762e-11	1.88491e-11	3.74177e-11	1.41483e-11	1.8146e-11	1.48687e-11	4.35493e-11	1.50168e-11	1.68737e-11	1.70245e-11	1.13233e-11	1.98211e-11	1.5236e-11	1.88167e-11	2.9169e-11
4.76	1.3533e-11	1.7786e-11	2.40133e-11	1.62607e-11	1.73755e-11	1.88451e-11	3.7424e-11	1.41411e-11	1.81434e-11	1.48679e-11	4.35686e-11	1.50181e-11	1.68751e-11	1.70225e-11	1.13201e-11	1.98232e-11	1.524e-11	1.882e-11	2.9159e-11
4.78	1.35352e-11	1.77816e-11	2.40109e-11	1.62668e-11	1.73723e-11	1.88447e-11	3.74242e-11	1.41495e-11	1.81446e-11	1.48605e-11	4.35557e-11	1.501e-11	1.68711e-11	1.70214e-11	1.13242e-11	1.98201e-11	1.52364e-11	1.88188e-11	2.91645e-11
4.8	1.3539e-11	1.77876e-11	2.40018e-11	1.62608e-11	1.737e-11	1.88438e-11	3.74219e-11	1.4147e-11	1.81491e-11	1.48677e-11	4.35597e-11	1.50167e-11	1.68738e-11	1.70194e-11	1.13226e-11	1.98188e-11	1.52363e-11	1.88186e-11	2.91531e-11
4.82	1.35394e-11	1.77912e-11	2.40093e-11	1.62596e-11	1.73775e-11	1.88457e-11	3.74306e-11	1.41451e-11	1.81479e-11	1.48628e-11	4.35511e-11	1.50232e-11	1.68741e-11	1.70208e-11	1.13337e-11	1.98207e-11	1.52412e-11	1.88255e-11	2.91638e-11
4.84	1.354e-11	1.77881e-11	2.40003e-11	1.62612e-11	1.73768e-11	1.88484e-11	3.74261e-11	1.41481e-11	1.81513e-11	1.48624e-11	4.35582e-11	1.50139e-11	1.68698e-11	1.70209e-11	1.13217e-11	1.98197e-11	1.52427e-11	1.88239e-11	2.91522e-11
4.86	1.35294e-11	1.77831e-11	2.40141e-11	1.62553e-11	1.73793e-11	1.88478e-11	3.74318e-11	1.41477e-11	1.81485e-11	1.48648e-11	4.3567e-11	1.50196e-11	1.68839e-11	1.70279e-11	1.13254e-11	1.98234e-11	1.52364e-11	1.88198e-11	2.91632e-11
4.88	1.35385e-11	1.77881e-11	2.40036e-11	1.62623e-11	1.73699e-11	1.88428e-11	3.74212e-11	1.41493e-11	1.81492e-11	1.48679e-11	4.35488e-11	1.502e-11	1.68783e-11	1.70244e-11	1.13213e-11	1.98178e-11	1.52349e-11	1.88189e-11	2.91544e-11
4.9	1.35334e-11	1.77806e-11	2.40139e-11	1.62624e-11	1.7372e-11	1.88443e-11	3.74248e-11	1.41481e-11	1.81495e-11	1.48639e-11	4.35507e-11	1.5012e-11	1.68762e-11	1.70247e-11	1.13235e-11	1.98241e-11	1.52358e-11	1.88165e-11	2.91629e-11
4.92	1.3541e-11	1.77828e-11	2.4e-11	1.62579e-11	1.738e-11	1.88462e-11	3.74226e-11	1.41451e-11	1.81455e-11	1.48636e-11	4.3568e-11	1.50125e-11	1.68749e-11	1.70217e-11	1.13182e-11	1.98175e-11	1.52314e-11	1.88208e-11	2.91629e-11
4.94	1.35343e-11	1.77901e-11	2.40045e-11	1.62616e-11	1.73785e-11	1.88471e-11	3.74258e-11	1.41472e-11	1.81503e-11	1.48611e-11	4.35562e-11	1.50145e-11	1.68779e-11	1.70252e-11	1.13289e-11	1.9819e-11	1.5231e-11	1.88234e-11	2.9161e-11
4.96	1.35308e-11	1.77821e-11	2.39925e-11	1.62665e-11	1.73733e-11	1.8845e-11	3.74249e-11	1.41467e-11	1.81511e-11	1.486e-11	4.35579e-11	1.50156e-11	1.68716e-11	1.7024e-11	1.13241e-11	1.98194e-11	1.52336e-11	1.88262e-11	2.91714e-11
4.98	1.35324e-11	1.77872e-11	2.39932e-11	1.62625e-11	1.73726e-11	1.88461e-11	3.74218e-11	1.41461e-11	1.8146e-11	1.48632e-11	4.35578e-11	1.50149e-11	1.68769e-11	1.70208e-11	1.13244e-11	1.98188e-11	1.52415e-11	1.88271e-11	2.91625e-11
5	1.35293e-11	1.77857e-11	2.40216e-11	1.62673e-11	1.73737e-11	1.88453e-11	3.74235e-11	1.41477e-11	1.81464e-11	1.48639e-11	4.35671e-11	1.50166e-11	1.68732e-11	1.70222e-11	1.13301e-11	1.98232e-11	1.52327e-11	1.88224e-11	2.91597e-11
5.02	1.35345e-11	1.77936e-11	2.40174e-11	1.62592e-11	1.73757e-11	1.88498e-11	3.74237e-11	1.41446e-11	1.81478e-11	1.48678e-11	4.35723e-11	1.50148e-11	1.68729e-11	1.70178e-11	1.13279e-11	1.98263e-11	1.52325e-11	1.8817e-11	2.91558e-11
5.04	1.35321e-11	1.77812e-11	2.40141e-11	1.62636e-11	1.73819e-11	1.88447e-11	3.74205e-11	1.41494e-11	1.8153e-11	1.48643e-11	4.35642e-11	1.50195e-11	1.68714e-11	1.7023e-11	1.1319e-11	1.98239e-11	1.52385e-11	1.8824e-11	2.91514e-11
5.06	1.35361e-11	1.77829e-11	2.40288e-11	1.62602e-11	1.73777e-11	1.88414e-11	3.74301e-11	1.41426e-11	1.81503e-11	1.48692e-11	4.35782e-11	1.50147e-11	1.68822e-11	1.70273e-11	1.13254e-11	1.98212e-11	1.52279e-11	1.88187e-11	2.91515e-11
5.08	1.35343e-11	1.77888e-11	2.40167e-11	1.62646e-11	1.73758e-11	1.88464e-11	3.74275e-11	1.41404e-11	1.81515e-11	1.48663e-11	4.35485e-11	1.50142e-11	1.68766e-11	1.70195e-11	1.13237e-11	1.982e-11	1.52354e-11	1.88266e-11	2.91503e-11
5.1	1.35345e-11	1.77887e-11	2.40238e-11	1.62597e-11	1.73729e-11	1.88452e-11	3.74265e-11	1.41422e-11	1.8152e-11	1.48669e-11	4.3563e-11	1.50144e-11	1.6876e-11	1.70239e-11	1.13214e-11	1.98256e-11	1.5236e-11	1.88271e-11	2.91642e-11
5.12	1.35336e-11	1.77891e-11	2.40258e-11	1.62612e-11	1.73799e-11	1.88492e-11	3.7424e-11	1.41462e-11	1.8147e-11	1.48703e-11	4.3571e-11	1.50135e-11	1.68775e-11	1.70236e-11	1.13237e-11	1.98239e-11	1.52365e-11	1.88209e-11	2.91507e-11
5.14	1.35355e-11	1.77809e-11	2.4008e-11	1.62604e-11	1.73765e-11	1.88438e-11	3.74219e-11	1.41421e-11	1.81526e-11	1.48644e-11	4.35574e-11	1.50178e-11	1.6879e-11	1.70217e-11	1.13233e-11	1.98244e-11	1.52327e-11	1.88157e-11	2.91643e-11
5.16	1.35358e-11	1.77839e-11	2.40159e-11	1.62604e-11	1.73762e-11	1.88443e-11	3.74256e-11	1.41459e-11	1.81497e-11	1.48673e-11	4.35526e-11	1.50121e-11	1.6877e-11	1.70252e-11	1.1327e-11	1.98252e-11	1.52375e-11	1.88252e-11	2.91645e-11
5.18	1.35355e-11	1.77852e-11	2.40174e-11	1.62657e-11	1.73782e-11	1.8845e-11	3.74368e-11	1.41451e-11	1.81486e-11	1.48653e-11	4.35388e-11	1.50133e-11	1.68802e-11	1.7017e-11	1.13182e-11	1.98238e-11	1.52281e-11	1.88231e-11	2.91564e-11
5.2	1.35329e-11	1.77863e-11	2.40081e-11	1.62596e-11	1.73743e-11	1.88448e-11	3.74303e-11	1.41404e-11	1.81492e-11	1.48651e-11	4.35641e-11	1.5016e-11	1.68759e-11	1.70166e-11	1.13159e-11	1.9821e-11	1.52263e-11	1.88191e-11	2.91584e-11
5.22	1.35352e-11	1.77853e-11	2.40129e-11	1.62593e-11	1.73742e-11	1.88443e-11	3.74342e-11	1.41437e-11	1.81518e-11	1.48651e-11	4.35539e-11	1.50143e-11	1.68841e-11	1.70187e-11	1.13247e-11	1.98208e-11	1.52304e-11	1.88203e-11	2.91675e-11
5.24	1.35303e-11	1.77841e-11	2.40062e-11	1.62639e-11	1.73752e-11	1.88449e-11	3.74267e-11	1.41414e-11	1.81483e-11	1.48646e-11	4.35708e-11	1.50167e-11	1.68822e-11	1.70148e-11	1.13222e-11	1.98253e-11	1.52306e-11	1.88343e-11	2.91532e-11
5.26	1.35331e-11	1.77889e-11	2.40189e-11	1.6261e-11	1.73731e-11	1.88487e-11	3.74308e-11	1.41424e-11	1.81498e-11	1.48717e-11	4.35558e-11	1.50144e-11	1.68796e-11	1.70122e-11	1.13159e-11	1.98216e-11	1.52292e-11	1.88241e-11	2.91556e-11
5.28	1.35324e-11	1.77905e-11	2.40219e-11	1.62597e-11	1.73776e-11	1.88463e-11	3.74238e-11	1.41475e-11	1.81557e-11	1.48703e-11	4.35649e-11	1.50165e-11	1.68799e-11	1.70156e-11	1.13219e-11	1.98244e-11	1.52272e-11	1.883e-11	2.9157e-11
5.3	1.35351e-11	1.77866e-11	2.40147e-11	1.62579e-11	1.73747e-11	1.88425e-11	3.74285e-11	1.41421e-11	1.81509e-11	1.48721e-11	4.35608e-11	1.5017e-11	1.68786e-11	1.70208e-11	1.13169e-11	1.98277e-11	1.52269e-11	1.88265e-11	2.91713e-11
5.32	1.35325e-11	1.77895e-11	2.40406e-11	1.62577e-11	1.73761e-11	1.88467e-11	3.74261e-11	1.41394e-11	1.81513e-11	1.48713e-11	4.3556e-11	1.50144e-11	1.6877e-11	1.7016e-11	1.13183e-11	1.98287e-11	1.5228e-11	1.8827e-11	2.91732e-11
5.34	1.35363e-11	1.77835e-11	2.40362e-11	1.62584e-11	1.73797e-11	1.88455e-11	3.74302e-11	1.41436e-11	1.81527e-11	1.48676e-11	4.35713e-11	1.50144e-11	1.68773e-11	1.70138e-11	1.13181e-11	1.98271e-11	1.52347e-11	1.88248e-11	2.91677e-11
5.36	1.35373e-11	1.77857e-11	2.40181e-11	1.62632e-11	1.73766e-11	1.88465e-11	3.74295e-11	1.41463e-11	1.81531e-11	1.4865e-11	4.35654e-11	1.50153e-11	1.6879e-11	1.70051e-11	1.1322e-11	1.98241e-11	1.52357e-11	1.88206e-11	2.91792e-11
5.38	1.35393e-11	1.77853e-11	2.40301e-11	1.62626e-11	1.73821e-11	1.88472e-11	3.74354e-11	1.41416e-11	1.81609e-11	1.48646e-11	4.35551e-11	1.5016e-11	1.68774e-11	1.70051e-11	1.13156e-11	1.98206e-11	1.52322e-11	1.88235e-11	2.91764e-11
5.4	1.35335e-11	1.77835e-11	2.40089e-11	1.62625e-11	1.73788e-11	1.88449e-11	3.74264e-11	1.41377e-11	1.81485e-11	1.48645e-11	4.35619e-11	1.501e-11	1.68785e-11	1.70088e-11	1.13191e-11	1.98259e-11	1.52328e-11	1.88245e-11	2.9188e-11
5.42	1.35327e-11	1.77842e-11	2.40271e-11	1.62638e-11	1.73756e-11	1.88427e-11	3.74222e-11	1.41413e-11	1.81543e-11	1.48679e-11	4.35472e-11	1.50184e-11	1.68791e-11	1.70062e-11	1.13204e-11	1.98253e-11	1.52283e-11	1.88266e-11	2.91703e-11
5.44	1.35357e-11	1.77821e-11	2.40109e-11	1.62635e-11	1.73725e-11	1.88448e-11	3.74259e-11	1.41426e-11	1.81501e-11	1.4863e-11	4.35645e-11	1.50121e-11	1.68775e-11	1.70083e-11	1.13218e-11	1.98303e-11	1.52285e-11	1.88229e-11	2.91817e-11
5.46	1.35381e-11	1.77848e-11	2.40172e-11	1.62616e-11	1.73777e-11	1.8843e-11	3.74204e-11	1.4139e-11	1.81483e-11	1.48636e-11	4.35596e-11	1.5017e-11	1.68804e-11	1.70013e-11	1.13202e-11	1.98274e-11	1.52282e-11	1.88223e-11	2.91743e-11
5.48	1.35316e-11	1.77857e-11	2.40154e-11	1.62595e-11	1.73839e-11	1.8845e-11	3.74265e-11	1.41394e-11	1.81471e-11	1.48629e-11	4.35413e-11	1.50172e-11	1.68785e-11	1.70025e-11	1.13201e-11	1.98254e-11	1.52276e-11	1.8828e-11	2.91848e-11
5.5	1.35326e-11	1.77871e-11	2.40079e-11	1.62653e-11	1.73774e-11	1.8844e-11	3.74242e-11	1.41359e-11	1.81447e-11	1.48659e-11	4.35598e-11	1.50147e-11	1.68769e-11	1.70048e-11	1.13162e-11	1.98285e-11	1.52231e-11	1.88256e-11	2.91785e-11
5.52	1.35324e-11	1.77868e-11	2.40035e-11	1.62595e-11	1.73726e-11	1.88454e-11	3.74194e-11	1.41407e-11	1.81512e-11	1.48659e-11	4.35569e-11	1.50119e-11	1.68754e-11	1.70067e-11	1.13213e-11	1.98299e-11	1.5227e-11	1.88221e-11	2.91707e-11
5.54	1.35303e-11	1.77869e-11	2.40125e-11	1.62583e-11	1.73753e-11	1.88497e-11	3.7418e-11	1.41383e-11	1.81522e-11	1.48652e-11	4.35495e-11	1.50158e-11	1.68736e-11	1.70125e-11	1.13195e-11	1.98243e-11	1.52212e-11	1.88274e-11	2.9176e-11
5.56	1.35333e-11	1.77806e-11	2.402e-11	1.62612e-11	1.7378e-11	1.88493e-11	3.74177e-11	1.41423e-11	1.81553e-11	1.48681e-11	4.35788e-11	1.50115e-11	1.68732e-11	1.70119e-11	1.13205e-11	1.98291e-11	1.52259e-11	1.88186e-11	2.91557e-11
5.58	1.35325e-11	1.77836e-11	2.40234e-11	1.62603e-11	1.73795e-11	1.88463e-11	3.74171e-11	1.41416e-11	1.81505e-11	1.48693e-11	4.35573e-11	1.5018e-11	1.68765e-11	1.70039e-11	1.13111e-11	1.98276e-11	1.5224e-11	1.88269e-11	2.91576e-11
5.6	1.35341e-11	1.77857e-11	2.40224e-11	1.62625e-11	1.73758e-11	1.885e-11	3.7414e-11	1.41366e-11	1.81502e-11	1.48664e-11	4.35557e-11	1.50136e-11	1.68789e-11	1.70125e-11	1.13173e-11	1.98321e-11	1.52257e-11	1.8821e-11	2.91656e-11
5.62	1.35328e-11	1.77877e-11	2.40296e-11	1.62624e-11	1.73789e-11	1.88444e-11	3.74161e-11	1.41495e-11	1.81468e-11	1.4869e-11	4.35745e-11	1.5014e-11	1.68781e-11	1.701e-11	1.13148e-11	1.98275e-11	1.52287e-11	1.88286e-11	2.91698e-11
5.64	1.35375e-11	1.7787e-11	2.40204e-11	1.62588e-11	1.73799e-11	1.88479e-11	3.74217e-11	1.41408e-11	1.81502e-11	1.48662e-11	4.35558e-11	1.50105e-11	1.68813e-11	1.70073e-11	1.13148e-11	1.98301e-11	1.52318e-11	1.88247e-11	2.91636e-11
5.66	1.35346e-11	1.77835e-11	2.40294e-11	1.62579e-11	1.73763e-11	1.88488e-11	3.7418e-11	1.41413e-11	1.81445e-11	1.48719e-11	4.35635e-11	1.50127e-11	1.68755e-11	1.70147e-11	1.13168e-11	1.98263e-11	1.52275e-11	1.88345e-11	2.91823e-11
5.68	1.35315e-11	1.77805e-11	2.40203e-11	1.62619e-11	1.73752e-11	1.88426e-11	3.74245e-11	1.41453e-11	1.81504e-11	1.48728e-11	4.35454e-11	1.50163e-11	1.68735e-11	1.70123e-11	1.13125e-11	1.98239e-11	1.52284e-11	1.8822e-11	2.91665e-11
5.7	1.3532e-11	1.77892e-11	2.40216e-11	1.62581e-11	1.73788e-11	1.88483e-11	3.74135e-11	1.41495e-11	1.81492e-11	1.48616e-11	4.3549e-11	1.50147e-11	1.68764e-11	1.70084e-11	1.13165e-11	1.98257e-11	1.52205e-11	1.88153e-11	2.91669e-11
5.72	1.35347e-11	1.77775e-11	2.40255e-11	1.62626e-11	1.73837e-11	1.88475e-11	3.74111e-11	1.41403e-11	1.81491e-11	1.48694e-11	4.35333e-11	1.50168e-11	1.68723e-11	1.70065e-11	1.13199e-11	1.98195e-11	1.52226e-11	1.88188e-11	2.91666e-11
5.74	1.35324e-11	1.77791e-11	2.40203e-11	1.6255e-11	1.73807e-11	1.8847e-11	3.74253e-11	1.41447e-11	1.81475e-11	1.48674e-11	4.35193e-11	1.50157e-11	1.68784e-11	1.70048e-11	1.13174e-11	1.98195e-11	1.52233e-11	1.88254e-11	2.91599e-11
5.76	1.3538e-11	1.77842e-11	2.40215e-11	1.62572e-11	1.73737e-11	1.88447e-11	3.74198e-11	1.41411e-11	1.81533e-11	1.48634e-11	4.35092e-11	1.50173e-11	1.68754e-11	1.70124e-11	1.13172e-11	1.98201e-11	1.52207e-11	1.88289e-11	2.91591e-11
5.78	1.35358e-11	1.77803e-11	2.40193e-11	1.62582e-11	1.73764e-11	1.88463e-11	3.74225e-11	1.41344e-11	1.81551e-11	1.48667e-11	4.34809e-11	1.50157e-11	1.68765e-11	1.70125e-11	1.13159e-11	1.98248e-11	1.52168e-11	1.8829e-11	2.91546e-11
5.8	1.35365e-11	1.77775e-11	2.40178e-11	1.62603e-11	1.73767e-11	1.88404e-11	3.74244e-11	1.41404e-11	1.81583e-11	1.48626e-11	4.3482e-11	1.50129e-11	1.6874e-11	1.70113e-11	1.13156e-11	1.98246e-11	1.52274e-11	1.88272e-11	2.91517e-11
5.82	1.35332e-11	1.77806e-11	2.40156e-11	1.62596e-11	1.73791e-11	1.88397e-11	3.74286e-11	1.41415e-11	1.81515e-11	1.48679e-11	4.34747e-11	1.50155e-11	1.68808e-11	1.70136e-11	1.13153e-11	1.98232e-11	1.52155e-11	1.88226e-11	2.91476e-11
5.84	1.35332e-11	1.77853e-11	2.40125e-11	1.62628e-11	1.73784e-11	1.88472e-11	3.74238e-11	1.41438e-11	1.81505e-11	1.4874e-11	4.34889e-11	1.5014e-11	1.68737e-11	1.70139e-11	1.13139e-11	1.98211e-11	1.52147e-11	1.88305e-11	2.91528e-11
5.86	1.35332e-11	1.77833e-11	2.40214e-11	1.62605e-11	1.73747e-11	1.88437e-11	3.74244e-11	1.41484e-11	1.81536e-11	1.48728e-11	4.34522e-11	1.50219e-11	1.68757e-11	1.70138e-11	1.13142e-11	1.98216e-11	1.52168e-11	1.88239e-11	2.91365e-11
5.88	1.35353e-11	1.77791e-11	2.40193e-11	1.62615e-11	1.73729e-11	1.88484e-11	3.74225e-11	1.41446e-11	1.81526e-11	1.4865e-11	4.3481e-11	1.50205e-11	1.68746e-11	1.7009e-11	1.13168e-11	1.98253e-11	1.52123e-11	1.88321e-11	2.91562e-11
5.9	1.35357e-11	1.77834e-11	2.40286e-11	1.62607e-11	1.73755e-11	1.88439e-11	3.74229e-11	1.41417e-11	1.81493e-11	1.48649e-11	4.34883e-11	1.5015e-11	1.68851e-11	1.70152e-11	1.13161e-11	1.98244e-11	1.51512e-11	1.88266e-11	2.91446e-11
5.92	1.35357e-11	1.77857e-11	2.40188e-11	1.62565e-11	1.73763e-11	1.88467e-11	3.74208e-11	1.41404e-11	1.81515e-11	1.48699e-11	4.35104e-11	1.50151e-11	1.68846e-11	1.70086e-11	1.13169e-11	1.9826e-11	1.5069e-11	1.88256e-11	2.91476e-11
5.94	1.35367e-11	1.77827e-11	2.40332e-11	1.62605e-11	1.73814e-11	1.8841e-11	3.74085e-11	1.41416e-11	1.81481e-11	1.48711e-11	4.35062e-11	1.50103e-11	1.68799e-11	1.70108e-11	1.13121e-11	1.98248e-11	1.50378e-11	1.88261e-11	2.91521e-11
5.96	1.3533e-11	1.77837e-11	2.40281e-11	1.62596e-11	1.73767e-11	1.88416e-11	3.74132e-11	1.41449e-11	1.81532e-11	1.48686e-11	4.3506e-11	1.50151e-11	1.68791e-11	1.70133e-11	1.13097e-11	1.98241e-11	1.50416e-11	1.88268e-11	2.91656e-11
5.98	1.35388e-11	1.77847e-11	2.40193e-11	1.62617e-11	1.73775e-11	1.88452e-11	3.74144e-11	1.41328e-11	1.81497e-11	1.4866e-11	4.35062e-11	1.50145e-11	1.68858e-11	1.70113e-11	1.13174e-11	1.98209e-11	1.50444e-11	1.88219e-11	2.91476e-11
6	1.35358e-11	1.7786e-11	2.40256e-11	1.62599e-11	1.73829e-11	1.88466e-11	3.74085e-11	1.41433e-11	1.81549e-11	1.48664e-11	4.35262e-11	1.5013e-11	1.6883e-11	1.70076e-11	1.13146e-11	1.98213e-11	1.50467e-11	1.88227e-11	2.91585e-11
6.02	1.35324e-11	1.77819e-11	2.40193e-11	1.62597e-11	1.73743e-11	1.88497e-11	3.74169e-11	1.41389e-11	1.81546e-11	1.48708e-11	4.35132e-11	1.50165e-11	1.68748e-11	1.70059e-11	1.13182e-11	1.98276e-11	1.50538e-11	1.88261e-11	2.91564e-11
6.04	1.35332e-11	1.77843e-11	2.40095e-11	1.62603e-11	1.73787e-11	1.88448e-11	3.74158e-11	1.41336e-11	1.81491e-11	1.48675e-11	4.35004e-11	1.50166e-11	1.68746e-11	1.70127e-11	1.13198e-11	1.98308e-11	1.50551e-11	1.88243e-11	2.91607e-11
6.06	1.35327e-11	1.77821e-11	2.40116e-11	1.62604e-11	1.73742e-11	1.88455e-11	3.74216e-11	1.41437e-11	1.81522e-11	1.48635e-11	4.35095e-11	1.50112e-11	1.68825e-11	1.70095e-11	1.13126e-11	1.98255e-11	1.50607e-11	1.88272e-11	2.91594e-11
6.08	1.35385e-11	1.77803e-11	2.4021e-11	1.62647e-11	1.73834e-11	1.88416e-11	3.74239e-11	1.41397e-11	1.81496e-11	1.48706e-11	4.35032e-11	1.50144e-11	1.68825e-11	1.70087e-11	1.13185e-11	1.98279e-11	1.50672e-11	1.88235e-11	2.91617e-11
6.1	1.3536e-11	1.77751e-11	2.40269e-11	1.62611e-11	1.73755e-11	1.88467e-11	3.74216e-11	1.41376e-11	1.81532e-11	1.48689e-11	4.35147e-11	1.5015e-11	1.68739e-11	1.70071e-11	1.13205e-11	1.98296e-11	1.50669e-11	1.88211e-11	2.91659e-11
6.12	1.35308e-11	1.77779e-11	2.40264e-11	1.62574e-11	1.73775e-11	1.88461e-11	3.74265e-11	1.41429e-11	1.81527e-11	1.48672e-11	4.35216e-11	1.50171e-11	1.6878e-11	1.7008e-11	1.13099e-11	1.98292e-11	1.5075e-11	1.8827e-11	2.91604e-11
6.14	1.353e-11	1.77754e-11	2.40279e-11	1.62602e-11	1.73794e-11	1.88487e-11	3.74175e-11	1.41468e-11	1.81517e-11	1.4866e-11	4.35321e-11	1.5014e-11	1.68718e-11	1.70039e-11	1.13175e-11	1.98236e-11	1.50787e-11	1.88303e-11	2.91638e-11
6.16	1.35317e-11	1.77746e-11	2.40233e-11	1.62636e-11	1.73777e-11	1.8844e-11	3.74189e-11	1.41474e-11	1.81496e-11	1.48688e-11	4.35076e-11	1.50105e-11	1.68779e-11	1.7007e-11	1.13125e-11	1.98317e-11	1.50835e-11	1.88322e-11	2.91492e-11
6.18	1.35324e-11	1.77825e-11	2.40041e-11	1.62607e-11	1.73736e-11	1.88476e-11	3.74138e-11	1.41423e-11	1.81498e-11	1.48745e-11	4.35144e-11	1.50129e-11	1.68754e-11	1.70126e-11	1.1315e-11	1.9823e-11	1.50838e-11	1.88295e-11	2.91507e-11
6.2	1.35307e-11	1.77731e-11	2.40176e-11	1.62626e-11	1.73796e-11	1.88458e-11	3.74134e-11	1.41396e-11	1.81494e-11	1.48759e-11	4.34981e-11	1.50092e-11	1.68794e-11	1.7008e-11	1.13161e-11	1.983e-11	1.50789e-11	1.88257e-11	2.91494e-11
6.22	1.35334e-11	1.77786e-11	2.40297e-11	1.62584e-11	1.73839e-11	1.88445e-11	3.7415e-11	1.41471e-11	1.81534e-11	1.48696e-11	4.35028e-11	1.50177e-11	1.68766e-11	1.70037e-11	1.13128e-11	1.98318e-11	1.50846e-11	1.88261e-11	2.91469e-11
6.24	1.35306e-11	1.77777e-11	2.40123e-11	1.62597e-11	1.73743e-11	1.88546e-11	3.74213e-11	1.41419e-11	1.81471e-11	1.48619e-11	4.3503e-11	1.50101e-11	1.68776e-11	1.70089e-11	1.13199e-11	1.98223e-11	1.50705e-11	1.88256e-11	2.91506e-11
6.26	1.35332e-11	1.77753e-11	2.40033e-11	1.6259e-11	1.73805e-11	1.8847e-11	3.74178e-11	1.41444e-11	1.81481e-11	1.48697e-11	4.35189e-11	1.50111e-11	1.68749e-11	1.70064e-11	1.13166e-11	1.9828e-11	1.50755e-11	1.88293e-11	2.91361e-11
6.28	1.35345e-11	1.77795e-11	2.40041e-11	1.62594e-11	1.73752e-11	1.88516e-11	3.74177e-11	1.41316e-11	1.81462e-11	1.48681e-11	4.35287e-11	1.5015e-11	1.68766e-11	1.70082e-11	1.13171e-11	1.98312e-11	1.50793e-11	1.8825e-11	2.91336e-11
6.3	1.35339e-11	1.77795e-11	2.39957e-11	1.62642e-11	1.73792e-11	1.88481e-11	3.74177e-11	1.41344e-11	1.81493e-11	1.48665e-11	4.35171e-11	1.50144e-11	1.68806e-11	1.70048e-11	1.13155e-11	1.98336e-11	1.50809e-11	1.88276e-11	2.91456e-11
6.32	1.35404e-11	1.7783e-11	2.39882e-11	1.62612e-11	1.73747e-11	1.88474e-11	3.74209e-11	1.41373e-11	1.81501e-11	1.48679e-11	4.35234e-11	1.50087e-11	1.68821e-11	1.69976e-11	1.13153e-11	1.98329e-11	1.50772e-11	1.88281e-11	2.9154e-11
6.34	1.35399e-11	1.77836e-11	2.39983e-11	1.6258e-11	1.73763e-11	1.88503e-11	3.7413e-11	1.41311e-11	1.81503e-11	1.4867e-11	4.35398e-11	1.5006e-11	1.68828e-11	1.70043e-11	1.13151e-11	1.98289e-11	1.50716e-11	1.88306e-11	2.91557e-11
6.36	1.35387e-11	1.77844e-11	2.39975e-11	1.62571e-11	1.73838e-11	1.88534e-11	3.74121e-11	1.41341e-11	1.81509e-11	1.48701e-11	4.35176e-11	1.50105e-11	1.68783e-11	1.7004e-11	1.13123e-11	1.98255e-11	1.50794e-11	1.88292e-11	2.91585e-11
6.38	1.35392e-11	1.77785e-11	2.39996e-11	1.62576e-11	1.73803e-11	1.88516e-11	3.74199e-11	1.41409e-11	1.81471e-11	1.48722e-11	4.35397e-11	1.50106e-11	1.68772e-11	1.70034e-11	1.13164e-11	1.98299e-11	1.50804e-11	1.88291e-11	2.91631e-11
6.4	1.35386e-11	1.77844e-11	2.40027e-11	1.62589e-11	1.73793e-11	1.88495e-11	3.74144e-11	1.41274e-11	1.81511e-11	1.48722e-11	4.35209e-11	1.50128e-11	1.68834e-11	1.70081e-11	1.13161e-11	1.98294e-11	1.50841e-11	1.88267e-11	2.91646e-11
6.42	1.35379e-11	1.77788e-11	2.40075e-11	1.62587e-11	1.73831e-11	1.88519e-11	3.74129e-11	1.41308e-11	1.81532e-11	1.48745e-11	4.3539e-11	1.50118e-11	1.68788e-11	1.70104e-11	1.13154e-11	1.98363e-11	1.5074e-11	1.88247e-11	2.91539e-11
6.44	1.35379e-11	1.77784e-11	2.40068e-11	1.6263e-11	1.73743e-11	1.88471e-11	3.74128e-11	1.41339e-11	1.81548e-11	1.48673e-11	4.35402e-11	1.50096e-11	1.6881e-11	1.70047e-11	1.13154e-11	1.98302e-11	1.50796e-11	1.88309e-11	2.91513e-11
6.46	1.35395e-11	1.77772e-11	2.40042e-11	1.62636e-11	1.73816e-11	1.88483e-11	3.741e-11	1.41232e-11	1.81507e-11	1.48696e-11	4.35376e-11	1.50092e-11	1.68789e-11	1.70048e-11	1.13196e-11	1.98321e-11	1.50799e-11	1.88263e-11	2.91471e-11
6.48	1.3534e-11	1.77775e-11	2.40044e-11	1.62622e-11	1.73757e-11	1.88468e-11	3.74134e-11	1.41349e-11	1.81524e-11	1.48763e-11	4.3538e-11	1.50112e-11	1.68793e-11	1.70052e-11	1.13209e-11	1.98333e-11	1.50804e-11	1.88325e-11	2.91527e-11
6.5	1.35402e-11	1.7769e-11	2.40134e-11	1.62569e-11	1.73812e-11	1.88507e-11	3.74215e-11	1.41314e-11	1.81504e-11	1.4871e-11	4.3528e-11	1.50152e-11	1.68787e-11	1.70017e-11	1.1317e-11	1.98313e-11	1.50833e-11	1.88319e-11	2.91649e-11
6.52	1.35298e-11	1.77725e-11	2.40129e-11	1.62618e-11	1.73748e-11	1.88514e-11	3.7419e-11	1.41303e-11	1.81486e-11	1.48714e-11	4.35385e-11	1.50124e-11	1.68778e-11	1.70114e-11	1.13167e-11	1.983e-11	1.50776e-11	1.88279e-11	2.91571e-11
6.54	1.35415e-11	1.77725e-11	2.4017e-11	1.62568e-11	1.73833e-11	1.88482e-11	3.74132e-11	1.41339e-11	1.81492e-11	1.48731e-11	4.35475e-11	1.50149e-11	1.68738e-11	1.70041e-11	1.13173e-11	1.98327e-11	1.50774e-11	1.88279e-11	2.91544e-11
6.56	1.35314e-11	1.77703e-11	2.40007e-11	1.62679e-11	1.7379e-11	1.88466e-11	3.74083e-11	1.41289e-11	1.81544e-11	1.48727e-11	4.35459e-11	1.50107e-11	1.68791e-11	1.70096e-11	1.13193e-11	1.98373e-11	1.50769e-11	1.88268e-11	2.91512e-11
6.58	1.35336e-11	1.77684e-11	2.40093e-11	1.62562e-11	1.73831e-11	1.88463e-11	3.74093e-11	1.41308e-11	1.8152e-11	1.48696e-11	4.35472e-11	1.5011e-11	1.68777e-11	1.70063e-11	1.13171e-11	1.98312e-11	1.50788e-11	1.88331e-11	2.91399e-11
6.6	1.35309e-11	1.77694e-11	2.4014e-11	1.62642e-11	1.73797e-11	1.88462e-11	3.74112e-11	1.41327e-11	1.81537e-11	1.4867e-11	4.35511e-11	1.501e-11	1.68812e-11	1.70088e-11	1.1321e-11	1.98274e-11	1.50781e-11	1.88319e-11	2.91454e-11
6.62	1.35363e-11	1.77662e-11	2.40042e-11	1.62606e-11	1.73789e-11	1.88486e-11	3.74102e-11	1.41372e-11	1.81527e-11	1.48695e-11	4.35409e-11	1.5013e-11	1.6877e-11	1.70089e-11	1.13166e-11	1.98285e-11	1.50741e-11	1.88338e-11	2.91428e-11
6.64	1.35418e-11	1.77724e-11	2.40152e-11	1.6261e-11	1.73784e-11	1.88451e-11	3.74165e-11	1.41339e-11	1.81519e-11	1.48747e-11	4.35417e-11	1.50117e-11	1.68786e-11	1.70031e-11	1.13218e-11	1.98293e-11	1.50738e-11	1.88326e-11	2.91452e-11
6.66	1.35371e-11	1.77731e-11	2.40086e-11	1.62635e-11	1.73808e-11	1.885e-11	3.74173e-11	1.41289e-11	1.8155e-11	1.48764e-11	4.35487e-11	1.50121e-11	1.68817e-11	1.70108e-11	1.13164e-11	1.98263e-11	1.5077e-11	1.88223e-11	2.91621e-11
6.68	1.35427e-11	1.77745e-11	2.40042e-11	1.62651e-11	1.73772e-11	1.88509e-11	3.74178e-11	1.41388e-11	1.81527e-11	1.48695e-11	4.35477e-11	1.50139e-11	1.6876e-11	1.70122e-11	1.13189e-11	1.98312e-11	1.50716e-11	1.88335e-11	2.91465e-11
6.7	1.35396e-11	1.77691e-11	2.40056e-11	1.62678e-11	1.73777e-11	1.88511e-11	3.74194e-11	1.41411e-11	1.8153e-11	1.48729e-11	4.35376e-11	1.50087e-11	1.68786e-11	1.70054e-11	1.13181e-11	1.98265e-11	1.50771e-11	1.88371e-11	2.91401e-11
6.72	1.35374e-11	1.77597e-11	2.40026e-11	1.62607e-11	1.7371e-11	1.88538e-11	3.74176e-11	1.41405e-11	1.81569e-11	1.48747e-11	4.35482e-11	1.50074e-11	1.6882e-11	1.70116e-11	1.13205e-11	1.9824e-11	1.50736e-11	1.88297e-11	2.91297e-11
6.74	1.35388e-11	1.77692e-11	2.40201e-11	1.62641e-11	1.73856e-11	1.88513e-11	3.74191e-11	1.41387e-11	1.81499e-11	1.48742e-11	4.35402e-11	1.50106e-11	1.68815e-11	1.70093e-11	1.13156e-11	1.98248e-11	1.5073e-11	1.88312e-11	2.91415e-11
6.76	1.35357e-11	1.77682e-11	2.39897e-11	1.62615e-11	1.73793e-11	1.88468e-11	3.74172e-11	1.41413e-11	1.81529e-11	1.48709e-11	4.35598e-11	1.50064e-11	1.6881e-11	1.7011e-11	1.13174e-11	1.98266e-11	1.50743e-11	1.88342e-11	2.91357e-11
6.78	1.35398e-11	1.77725e-11	2.40094e-11	1.62663e-11	1.73803e-11	1.88478e-11	3.7413e-11	1.41406e-11	1.81531e-11	1.48686e-11	4.35586e-11	1.50099e-11	1.68803e-11	1.70047e-11	1.13155e-11	1.98239e-11	1.50766e-11	1.88274e-11	2.91231e-11
6.8	1.35356e-11	1.77674e-11	2.39997e-11	1.62659e-11	1.73755e-11	1.88478e-11	3.74156e-11	1.41406e-11	1.81556e-11	1.48721e-11	4.35455e-11	1.501e-11	1.68783e-11	1.70045e-11	1.13199e-11	1.98276e-11	1.50728e-11	1.88286e-11	2.91356e-11
6.82	1.35401e-11	1.77721e-11	2.39955e-11	1.62636e-11	1.73748e-11	1.88434e-11	3.74113e-11	1.41407e-11	1.81549e-11	1.48732e-11	4.35359e-11	1.50127e-11	1.68758e-11	1.70025e-11	1.13176e-11	1.98228e-11	1.50729e-11	1.88354e-11	2.91232e-11
6.84	1.35388e-11	1.77726e-11	2.40072e-11	1.62598e-11	1.73763e-11	1.88489e-11	3.74171e-11	1.41481e-11	1.81559e-11	1.48777e-11	4.3554e-11	1.50055e-11	1.68798e-11	1.70079e-11	1.13182e-11	1.98255e-11	1.5068e-11	1.88341e-11	2.9137e-11
6.86	1.35421e-11	1.77708e-11	2.40021e-11	1.6261e-11	1.73738e-11	1.88492e-11	3.74169e-11	1.4143e-11	1.81572e-11	1.48745e-11	4.35685e-11	1.50134e-11	1.68803e-11	1.70076e-11	1.13142e-11	1.98276e-11	1.5071e-11	1.88313e-11	2.91306e-11
6.88	1.35342e-11	1.77749e-11	2.40098e-11	1.62615e-11	1.73778e-11	1.8848e-11	3.74227e-11	1.41398e-11	1.81569e-11	1.48706e-11	4.35396e-11	1.50126e-11	1.68736e-11	1.70042e-11	1.13166e-11	1.98291e-11	1.50729e-11	1.88283e-11	2.91249e-11
6.9	1.35373e-11	1.77648e-11	2.3995e-11	1.62579e-11	1.73779e-11	1.88472e-11	3.74249e-11	1.41386e-11	1.81531e-11	1.48775e-11	4.35444e-11	1.50115e-11	1.6883e-11	1.70036e-11	1.13212e-11	1.98299e-11	1.50731e-11	1.8835e-11	2.91232e-11
6.92	1.35366e-11	1.77704e-11	2.39989e-11	1.62635e-11	1.73793e-11	1.88505e-11	3.74186e-11	1.41388e-11	1.81523e-11	1.48758e-11	4.35442e-11	1.50101e-11	1.68797e-11	1.70131e-11	1.13128e-11	1.98254e-11	1.50714e-11	1.88283e-11	2.91309e-11
6.94	1.35337e-11	1.77715e-11	2.40036e-11	1.62628e-11	1.73758e-11	1.88482e-11	3.74191e-11	1.41353e-11	1.81511e-11	1.48762e-11	4.35481e-11	1.50113e-11	1.68793e-11	1.70074e-11	1.13161e-11	1.98276e-11	1.5072e-11	1.88344e-11	2.9127e-11
6.96	1.35332e-11	1.77705e-11	2.40056e-11	1.62665e-11	1.73754e-11	1.88489e-11	3.74209e-11	1.41434e-11	1.81538e-11	1.48713e-11	4.35434e-11	1.50082e-11	1.68845e-11	1.70063e-11	1.13183e-11	1.98231e-11	1.50723e-11	1.88342e-11	2.91336e-11
6.98	1.35382e-11	1.77706e-11	2.40075e-11	1.62654e-11	1.73773e-11	1.8847e-11	3.74178e-11	1.41475e-11	1.81582e-11	1.48733e-11	4.35386e-11	1.50077e-11	1.68813e-11	1.7007e-11	1.13271e-11	1.98251e-11	1.50676e-11	1.88346e-11	2.91379e-11
7	1.35341e-11	1.77692e-11	2.40039e-11	1.62579e-11	1.73773e-11	1.88554e-11	3.74209e-11	1.41466e-11	1.8159e-11	1.48711e-11	4.35549e-11	1.50159e-11	1.68765e-11	1.70036e-11	1.13204e-11	1.98326e-11	1.50674e-11	1.88338e-11	2.91249e-11
7.02	1.35354e-11	1.77688e-11	2.40117e-11	1.6262e-11	1.73804e-11	1.88461e-11	3.74236e-11	1.41431e-11	1.81545e-11	1.48737e-11	4.35607e-11	1.5011e-11	1.68849e-11	1.7004e-11	1.13197e-11	1.98278e-11	1.50693e-11	1.88266e-11	2.91407e-11
7.04	1.35316e-11	1.77646e-11	2.40065e-11	1.62663e-11	1.73793e-11	1.88457e-11	3.74229e-11	1.41472e-11	1.81552e-11	1.48719e-11	4.35442e-11	1.50127e-11	1.68803e-11	1.70056e-11	1.13213e-11	1.98312e-11	1.50677e-11	1.88357e-11	2.9135e-11
7.06	1.35318e-11	1.77638e-11	2.39886e-11	1.6262e-11	1.738e-11	1.88495e-11	3.74262e-11	1.41483e-11	1.81604e-11	1.48754e-11	4.35347e-11	1.50104e-11	1.68759e-11	1.70095e-11	1.13172e-11	1.98323e-11	1.50683e-11	1.88299e-11	2.91399e-11
7.08	1.35381e-11	1.77684e-11	2.40079e-11	1.62668e-11	1.73746e-11	1.88508e-11	3.74257e-11	1.41472e-11	1.81602e-11	1.48733e-11	4.35385e-11	1.50157e-11	1.68775e-11	1.70056e-11	1.13161e-11	1.98259e-11	1.50654e-11	1.88424e-11	2.91295e-11
7.1	1.35327e-11	1.7774e-11	2.40003e-11	1.62667e-11	1.73802e-11	1.88465e-11	3.74228e-11	1.4144e-11	1.81534e-11	1.48735e-11	4.35424e-11	1.50083e-11	1.68769e-11	1.69991e-11	1.1318e-11	1.98285e-11	1.50735e-11	1.88367e-11	2.91367e-11
7.12	1.35328e-11	1.77698e-11	2.4002e-11	1.62645e-11	1.73778e-11	1.88486e-11	3.74254e-11	1.41508e-11	1.81569e-11	1.48778e-11	4.35363e-11	1.50098e-11	1.68831e-11	1.70103e-11	1.13196e-11	1.98238e-11	1.50678e-11	1.88363e-11	2.91291e-11
7.14	1.35345e-11	1.77701e-11	2.39966e-11	1.62588e-11	1.73815e-11	1.88474e-11	3.74297e-11	1.41458e-11	1.8156e-11	1.48722e-11	4.355e-11	1.50071e-11	1.6883e-11	1.70043e-11	1.13145e-11	1.98248e-11	1.50692e-11	1.88399e-11	2.91352e-11
7.16	1.35299e-11	1.77676e-11	2.39947e-11	1.62637e-11	1.73803e-11	1.88488e-11	3.74301e-11	1.41421e-11	1.81588e-11	1.48755e-11	4.35501e-11	1.50069e-11	1.68801e-11	1.70023e-11	1.13185e-11	1.98309e-11	1.5072e-11	1.88368e-11	2.91222e-11
7.18	1.35348e-11	1.77669e-11	2.40018e-11	1.62627e-11	1.73826e-11	1.88492e-11	3.74312e-11	1.41486e-11	1.81543e-11	1.48769e-11	4.35462e-11	1.5008e-11	1.68826e-11	1.70089e-11	1.13191e-11	1.98323e-11	1.50686e-11	1.88401e-11	2.91254e-11
7.2	1.35334e-11	1.77624e-11	2.40089e-11	1.62618e-11	1.73799e-11	1.8855e-11	3.74255e-11	1.41414e-11	1.81565e-11	1.48762e-11	4.35526e-11	1.50102e-11	1.68814e-11	1.70077e-11	1.13125e-11	1.98294e-11	1.50742e-11	1.88407e-11	2.91421e-11
7.22	1.35318e-11	1.77658e-11	2.4005e-11	1.62614e-11	1.73781e-11	1.88421e-11	3.74182e-11	1.41496e-11	1.81588e-11	1.48734e-11	4.35462e-11	1.50112e-11	1.68827e-11	1.70101e-11	1.13147e-11	1.98329e-11	1.50776e-11	1.88423e-11	2.91487e-11
7.24	1.35343e-11	1.77643e-11	2.40031e-11	1.62654e-11	1.73813e-11	1.88512e-11	3.74321e-11	1.41445e-11	1.81599e-11	1.48778e-11	4.35528e-11	1.50096e-11	1.68803e-11	1.70077e-11	1.13239e-11	1.98293e-11	1.50754e-11	1.88274e-11	2.91396e-11
7.26	1.3536e-11	1.77731e-11	2.40037e-11	1.62658e-11	1.73792e-11	1.88487e-11	3.74143e-11	1.41464e-11	1.81582e-11	1.48679e-11	4.35473e-11	1.50088e-11	1.68844e-11	1.70078e-11	1.13206e-11	1.98201e-11	1.50745e-11	1.88309e-11	2.91333e-11
7.28	1.35343e-11	1.77666e-11	2.40125e-11	1.62648e-11	1.73759e-11	1.88453e-11	3.74185e-11	1.41451e-11	1.81594e-11	1.48713e-11	4.35516e-11	1.50124e-11	1.68815e-11	1.70056e-11	1.1318e-11	1.98212e-11	1.50705e-11	1.88361e-11	2.91411e-11
7.3	1.35321e-11	1.77624e-11	2.40019e-11	1.62642e-11	1.73788e-11	1.88476e-11	3.74251e-11	1.41526e-11	1.8155e-11	1.48751e-11	4.3523e-11	1.50167e-11	1.68807e-11	1.70049e-11	1.13171e-11	1.98268e-11	1.50665e-11	1.88319e-11	2.91244e-11
7.32	1.35309e-11	1.77683e-11	2.40179e-11	1.62632e-11	1.73858e-11	1.88491e-11	3.74186e-11	1.41455e-11	1.81595e-11	1.48746e-11	4.35423e-11	1.50173e-11	1.68851e-11	1.69996e-11	1.13096e-11	1.9821e-11	1.50722e-11	1.88322e-11	2.91308e-11
7.34	1.35271e-11	1.77641e-11	2.40135e-11	1.62653e-11	1.73803e-11	1.88516e-11	3.74192e-11	1.41518e-11	1.81531e-11	1.4873e-11	4.35352e-11	1.50155e-11	1.68795e-11	1.70112e-11	1.13099e-11	1.98209e-11	1.50751e-11	1.88344e-11	2.9122e-11
7.36	1.35318e-11	1.77635e-11	2.40195e-11	1.62604e-11	1.73801e-11	1.88555e-11	3.74215e-11	1.41457e-11	1.81532e-11	1.4879e-11	4.35566e-11	1.50131e-11	1.68824e-11	1.70093e-11	1.13134e-11	1.98257e-11	1.50758e-11	1.88276e-11	2.91289e-11
7.38	1.35321e-11	1.77703e-11	2.40154e-11	1.62618e-11	1.73794e-11	1.88551e-11	3.74284e-11	1.41525e-11	1.81524e-11	1.48725e-11	4.35614e-11	1.50138e-11	1.6881e-11	1.69995e-11	1.13117e-11	1.98196e-11	1.5073e-11	1.88334e-11	2.91186e-11
7.4	1.35308e-11	1.77749e-11	2.40145e-11	1.62657e-11	1.73835e-11	1.88442e-11	3.74196e-11	1.41371e-11	1.81504e-11	1.4872e-11	4.35459e-11	1.50156e-11	1.68849e-11	1.7013e-11	1.13138e-11	1.98186e-11	1.50712e-11	1.8831e-11	2.90997e-11
7.42	1.35336e-11	1.77685e-11	2.40075e-11	1.62634e-11	1.73825e-11	1.8851e-11	3.74236e-11	1.41356e-11	1.81544e-11	1.48725e-11	4.35517e-11	1.50112e-11	1.68862e-11	1.70059e-11	1.13136e-11	1.98144e-11	1.50757e-11	1.88304e-11	2.91092e-11
7.44	1.35285e-11	1.7774e-11	2.40286e-11	1.62594e-11	1.73816e-11	1.88453e-11	3.7424e-11	1.41432e-11	1.81538e-11	1.48764e-11	4.35469e-11	1.50123e-11	1.6879e-11	1.70042e-11	1.13211e-11	1.98217e-11	1.50735e-11	1.88239e-11	2.91155e-11
7.46	1.35315e-11	1.77775e-11	2.40446e-11	1.62604e-11	1.73794e-11	1.8849e-11	3.74246e-11	1.41454e-11	1.8154e-11	1.48742e-11	4.3528e-11	1.50065e-11	1.6886e-11	1.70057e-11	1.13119e-11	1.98228e-11	1.5077e-11	1.88349e-11	2.91229e-11
7.48	1.35276e-11	1.77706e-11	2.40425e-11	1.6261e-11	1.7385e-11	1.88518e-11	3.74256e-11	1.41445e-11	1.81554e-11	1.48726e-11	4.3539e-11	1.50078e-11	1.68839e-11	1.70039e-11	1.13085e-11	1.98216e-11	1.5073e-11	1.88365e-11	2.91155e-11
7.5	1.35275e-11	1.77726e-11	2.40427e-11	1.62634e-11	1.73774e-11	1.88511e-11	3.74291e-11	1.41405e-11	1.81545e-11	1.48736e-11	4.35456e-11	1.50128e-11	1.688e-11	1.6999e-11	1.13208e-11	1.98182e-11	1.50738e-11	1.88368e-11	2.91259e-11
7.52	1.35241e-11	1.7766e-11	2.40225e-11	1.62613e-11	1.73833e-11	1.88483e-11	3.74287e-11	1.41321e-11	1.81554e-11	1.4874e-11	4.35283e-11	1.50127e-11	1.68813e-11	1.69979e-11	1.13121e-11	1.98243e-11	1.50755e-11	1.8834e-11	2.91237e-11
7.54	1.35191e-11	1.77636e-11	2.40213e-11	1.62633e-11	1.73844e-11	1.88508e-11	3.74288e-11	1.41406e-11	1.81509e-11	1.48767e-11	4.3538e-11	1.50113e-11	1.68877e-11	1.70019e-11	1.13155e-11	1.98181e-11	1.50684e-11	1.88426e-11	2.91266e-11
7.56	1.3502e-11	1.77722e-11	2.40533e-11	1.62654e-11	1.73861e-11	1.88521e-11	3.74282e-11	1.41457e-11	1.81499e-11	1.4877e-11	4.35398e-11	1.501e-11	1.68821e-11	1.70041e-11	1.13187e-11	1.98221e-11	1.50762e-11	1.88334e-11	2.914e-11
7.58	1.34797e-11	1.77734e-11	2.40625e-11	1.62653e-11	1.73821e-11	1.88505e-11	3.74278e-11	1.41394e-11	1.81547e-11	1.48741e-11	4.35465e-11	1.50125e-11	1.68816e-11	1.70045e-11	1.13175e-11	1.98172e-11	1.5079e-11	1.88379e-11	2.9142e-11
7.6	1.34685e-11	1.77615e-11	2.40391e-11	1.62652e-11	1.73775e-11	1.88528e-11	3.7428e-11	1.41382e-11	1.81517e-11	1.48751e-11	4.35422e-11	1.50108e-11	1.68851e-11	1.70131e-11	1.13178e-11	1.98205e-11	1.50757e-11	1.88366e-11	2.91359e-11
7.62	1.34621e-11	1.77659e-11	2.40313e-11	1.626e-11	1.73798e-11	1.88501e-11	3.7424e-11	1.41371e-11	1.81521e-11	1.48749e-11	4.35357e-11	1.50099e-11	1.68812e-11	1.70004e-11	1.13162e-11	1.98218e-11	1.50703e-11	1.88393e-11	2.91348e-11
7.64	1.34473e-11	1.77712e-11	2.40319e-11	1.62667e-11	1.73759e-11	1.88512e-11	3.74232e-11	1.41374e-11	1.81531e-11	1.48767e-11	4.35421e-11	1.50105e-11	1.68844e-11	1.7006e-11	1.13239e-11	1.98226e-11	1.50751e-11	1.88341e-11	2.913e-11
7.66	1.34484e-11	1.77639e-11	2.40368e-11	1.62626e-11	1.73846e-11	1.88503e-11	3.74309e-11	1.41298e-11	1.81551e-11	1.48715e-11	4.35425e-11	1.50158e-11	1.68837e-11	1.70033e-11	1.13171e-11	1.98201e-11	1.50799e-11	1.88269e-11	2.91279e-11
7.68	1.34493e-11	1.77688e-11	2.4033e-11	1.62574e-11	1.73809e-11	1.88529e-11	3.74198e-11	1.41371e-11	1.81516e-11	1.4873e-11	4.35388e-11	1.50124e-11	1.68846e-11	1.69997e-11	1.13217e-11	1.98221e-11	1.50805e-11	1.88295e-11	2.91225e-11
7.7	1.34482e-11	1.77634e-11	2.40333e-11	1.62655e-11	1.73847e-11	1.88542e-11	3.74303e-11	1.41386e-11	1.81534e-11	1.48734e-11	4.35438e-11	1.50144e-11	1.68826e-11	1.70034e-11	1.13203e-11	1.98238e-11	1.50757e-11	1.8829e-11	2.91311e-11
7.72	1.34535e-11	1.77713e-11	2.40248e-11	1.62614e-11	1.73886e-11	1.88511e-11	3.74257e-11	1.41344e-11	1.81514e-11	1.48729e-11	4.35413e-11	1.50116e-11	1.68803e-11	1.7004e-11	1.13149e-11	1.98191e-11	1.50831e-11	1.88336e-11	2.91338e-11
7.74	1.34543e-11	1.7769e-11	2.40328e-11	1.6259e-11	1.73798e-11	1.88521e-11	3.74208e-11	1.41368e-11	1.81558e-11	1.48761e-11	4.3543e-11	1.50073e-11	1.68765e-11	1.7004e-11	1.13194e-11	1.98304e-11	1.508e-11	1.88329e-11	2.91367e-11
7.76	1.34553e-11	1.77722e-11	2.40205e-11	1.62622e-11	1.73824e-11	1.88526e-11	3.74304e-11	1.41388e-11	1.81561e-11	1.48776e-11	4.35502e-11	1.50065e-11	1.68845e-11	1.70064e-11	1.1312e-11	1.98211e-11	1.50803e-11	1.88337e-11	2.91376e-11
7.78	1.34565e-11	1.77768e-11	2.40365e-11	1.62619e-11	1.73799e-11	1.88531e-11	3.74275e-11	1.41343e-11	1.81541e-11	1.48743e-11	4.355e-11	1.5007e-11	1.68859e-11	1.70031e-11	1.13124e-11	1.98235e-11	1.50782e-11	1.88417e-11	2.91226e-11
7.8	1.34574e-11	1.77722e-11	2.40551e-11	1.6264e-11	1.73824e-11	1.88507e-11	3.74275e-11	1.41377e-11	1.8159e-11	1.48723e-11	4.3542e-11	1.50092e-11	1.68844e-11	1.69998e-11	1.13127e-11	1.98244e-11	1.50807e-11	1.88409e-11	2.91274e-11
7.82	1.34612e-11	1.77732e-11	2.40626e-11	1.62603e-11	1.73792e-11	1.88508e-11	3.74285e-11	1.41361e-11	1.81573e-11	1.48775e-11	4.35471e-11	1.50104e-11	1.68837e-11	1.70042e-11	1.13176e-11	1.98234e-11	1.50854e-11	1.88343e-11	2.91315e-11
7.84	1.34583e-11	1.77667e-11	2.40563e-11	1.62662e-11	1.73801e-11	1.88537e-11	3.74279e-11	1.41383e-11	1.81574e-11	1.48743e-11	4.35472e-11	1.5013e-11	1.68827e-11	1.70042e-11	1.13166e-11	1.98264e-11	1.50856e-11	1.88339e-11	2.91536e-11
7.86	1.34475e-11	1.77732e-11	2.40434e-11	1.62662e-11	1.73846e-11	1.88496e-11	3.74291e-11	1.41378e-11	1.81586e-11	1.48696e-11	4.35502e-11	1.50093e-11	1.68825e-11	1.70075e-11	1.13111e-11	1.98278e-11	1.50852e-11	1.88262e-11	2.91539e-11
7.88	1.3458e-11	1.77691e-11	2.40611e-11	1.62615e-11	1.73817e-11	1.88518e-11	3.74297e-11	1.41415e-11	1.81564e-11	1.48742e-11	4.35442e-11	1.50128e-11	1.68832e-11	1.69952e-11	1.13164e-11	1.98261e-11	1.50859e-11	1.8833e-11	2.91447e-11
7.9	1.34545e-11	1.77699e-11	2.40425e-11	1.62648e-11	1.73779e-11	1.88499e-11	3.74278e-11	1.41384e-11	1.81537e-11	1.48754e-11	4.35453e-11	1.50061e-11	1.68832e-11	1.70003e-11	1.13157e-11	1.98188e-11	1.50834e-11	1.88379e-11	2.91575e-11
7.92	1.34468e-11	1.77673e-11	2.40508e-11	1.62587e-11	1.73818e-11	1.88539e-11	3.74298e-11	1.4143e-11	1.81607e-11	1.48734e-11	4.35591e-11	1.50094e-11	1.68892e-11	1.69992e-11	1.13146e-11	1.98259e-11	1.50844e-11	1.8835e-11	2.91474e-11
7.94	1.34518e-11	1.77657e-11	2.40559e-11	1.62638e-11	1.73832e-11	1.88497e-11	3.74249e-11	1.4146e-11	1.81535e-11	1.48718e-11	4.35344e-11	1.50083e-11	1.68859e-11	1.70011e-11	1.13138e-11	1.98241e-11	1.50849e-11	1.88343e-11	2.91415e-11
7.96	1.34437e-11	1.77685e-11	2.40557e-11	1.62589e-11	1.7382e-11	1.88533e-11	3.74321e-11	1.41347e-11	1.81571e-11	1.48792e-11	4.3549e-11	1.5012e-11	1.68871e-11	1.69996e-11	1.13097e-11	1.98259e-11	1.50827e-11	1.88369e-11	2.91382e-11
7.98	1.34473e-11	1.77767e-11	2.40441e-11	1.62591e-11	1.73806e-11	1.88483e-11	3.74289e-11	1.41424e-11	1.81574e-11	1.4878e-11	4.35397e-11	1.5012e-11	1.68829e-11	1.70014e-11	1.13101e-11	1.98215e-11	1.50882e-11	1.88324e-11	2.91229e-11
8	1.34429e-11	1.77732e-11	2.40385e-11	1.62655e-11	1.73852e-11	1.88526e-11	3.7426e-11	1.41401e-11	1.81548e-11	1.48751e-11	4.35437e-11	1.50081e-11	1.68807e-11	1.70053e-11	1.13187e-11	1.98273e-11	1.50852e-11	1.88324e-11	2.91329e-11
8.02	1.34456e-11	1.7773e-11	2.40391e-11	1.62626e-11	1.73842e-11	1.88522e-11	3.74256e-11	1.41459e-11	1.81622e-11	1.48795e-11	4.35656e-11	1.50119e-11	1.68816e-11	1.69981e-11	1.13193e-11	1.98226e-11	1.5078e-11	1.88308e-11	2.91327e-11
8.04	1.34392e-11	1.77642e-11	2.40389e-11	1.62596e-11	1.73843e-11	1.88566e-11	3.74244e-11	1.41429e-11	1.81556e-11	1.48763e-11	4.35527e-11	1.50102e-11	1.68793e-11	1.69974e-11	1.13149e-11	1.98237e-11	1.50855e-11	1.88333e-11	2.91276e-11
8.06	1.3433e-11	1.77682e-11	2.40314e-11	1.62638e-11	1.73831e-11	1.88508e-11	3.74239e-11	1.41448e-11	1.81584e-11	1.48763e-11	4.35471e-11	1.50119e-11	1.68878e-11	1.70002e-11	1.13085e-11	1.98248e-11	1.50857e-11	1.88351e-11	2.91146e-11
8.08	1.34375e-11	1.77631e-11	2.40333e-11	1.62585e-11	1.73887e-11	1.88516e-11	3.7435e-11	1.41449e-11	1.81547e-11	1.48734e-11	4.35562e-11	1.50071e-11	1.68755e-11	1.70048e-11	1.13155e-11	1.98257e-11	1.5083e-11	1.88374e-11	2.91109e-11
8.1	1.34363e-11	1.77766e-11	2.4043e-11	1.62629e-11	1.73799e-11	1.88488e-11	3.74323e-11	1.41413e-11	1.81598e-11	1.48755e-11	4.3555e-11	1.50077e-11	1.68837e-11	1.69974e-11	1.13151e-11	1.98242e-11	1.5085e-11	1.88349e-11	2.91199e-11
8.12	1.34322e-11	1.77702e-11	2.40486e-11	1.62635e-11	1.73892e-11	1.88503e-11	3.74345e-11	1.4138e-11	1.81569e-11	1.48782e-11	4.35514e-11	1.50065e-11	1.68815e-11	1.70004e-11	1.13142e-11	1.98249e-11	1.50858e-11	1.88339e-11	2.91173e-11
8.14	1.34304e-11	1.7762e-11	2.40281e-11	1.62601e-11	1.73817e-11	1.8853e-11	3.74271e-11	1.41437e-11	1.81572e-11	1.48755e-11	4.35359e-11	1.50117e-11	1.68879e-11	1.70012e-11	1.13173e-11	1.98233e-11	1.50871e-11	1.88357e-11	2.91184e-11
8.16	1.34328e-11	1.77725e-11	2.40065e-11	1.62611e-11	1.73847e-11	1.88518e-11	3.74282e-11	1.4134e-11	1.81557e-11	1.48736e-11	4.35586e-11	1.50086e-11	1.68826e-11	1.70008e-11	1.13155e-11	1.98284e-11	1.50837e-11	1.88318e-11	2.91238e-11
8.18	1.34266e-11	1.77712e-11	2.40131e-11	1.62654e-11	1.73889e-11	1.88501e-11	3.74271e-11	1.41406e-11	1.81575e-11	1.48781e-11	4.35545e-11	1.50086e-11	1.68843e-11	1.70038e-11	1.13162e-11	1.98273e-11	1.5088e-11	1.88323e-11	2.91227e-11
8.2	1.34316e-11	1.77616e-11	2.40124e-11	1.62577e-11	1.73852e-11	1.8853e-11	3.74272e-11	1.41355e-11	1.81606e-11	1.4875e-11	4.35467e-11	1.50035e-11	1.68869e-11	1.7003e-11	1.13117e-11	1.9829e-11	1.50867e-11	1.88328e-11	2.91253e-11
8.22	1.34259e-11	1.77646e-11	2.40094e-11	1.62585e-11	1.73855e-11	1.88527e-11	3.74328e-11	1.41435e-11	1.81598e-11	1.4877e-11	4.35396e-11	1.50058e-11	1.68873e-11	1.70016e-11	1.13166e-11	1.98267e-11	1.50828e-11	1.88348e-11	2.91252e-11
8.24	1.34243e-11	1.7771e-11	2.40087e-11	1.6268e-11	1.73821e-11	1.88541e-11	3.74253e-11	1.414e-11	1.81593e-11	1.48756e-11	4.35432e-11	1.50119e-11	1.68904e-11	1.70029e-11	1.1315e-11	1.98217e-11	1.5085e-11	1.88295e-11	2.91315e-11
8.26	1.34233e-11	1.77626e-11	2.40105e-11	1.62577e-11	1.73842e-11	1.88508e-11	3.7431e-11	1.41448e-11	1.81597e-11	1.4874e-11	4.35642e-11	1.50053e-11	1.68919e-11	1.70016e-11	1.13129e-11	1.98256e-11	1.50908e-11	1.88338e-11	2.91173e-11
8.28	1.34243e-11	1.77513e-11	2.40293e-11	1.62657e-11	1.73855e-11	1.88476e-11	3.74305e-11	1.41418e-11	1.81553e-11	1.48791e-11	4.35597e-11	1.50086e-11	1.68889e-11	1.70026e-11	1.13165e-11	1.98248e-11	1.50876e-11	1.88267e-11	2.91385e-11
8.3	1.34329e-11	1.77694e-11	2.40245e-11	1.62614e-11	1.73801e-11	1.88514e-11	3.74295e-11	1.41431e-11	1.81598e-11	1.48765e-11	4.35527e-11	1.5004e-11	1.68901e-11	1.70037e-11	1.13097e-11	1.98255e-11	1.5088e-11	1.88305e-11	2.91238e-11
8.32	1.34249e-11	1.77689e-11	2.40147e-11	1.62628e-11	1.73844e-11	1.88526e-11	3.74352e-11	1.41355e-11	1.81589e-11	1.48755e-11	4.35587e-11	1.50078e-11	1.68865e-11	1.70013e-11	1.13144e-11	1.98295e-11	1.50876e-11	1.88272e-11	2.91218e-11
8.34	1.34231e-11	1.77613e-11	2.40135e-11	1.62655e-11	1.73775e-11	1.88528e-11	3.74267e-11	1.41361e-11	1.81568e-11	1.48775e-11	4.35511e-11	1.50129e-11	1.6885e-11	1.69998e-11	1.13178e-11	1.98286e-11	1.50884e-11	1.88401e-11	2.91249e-11
8.36	1.34269e-11	1.77684e-11	2.40217e-11	1.62598e-11	1.73825e-11	1.88521e-11	3.74192e-11	1.41363e-11	1.81545e-11	1.48729e-11	4.3554e-11	1.50083e-11	1.68843e-11	1.70028e-11	1.1313e-11	1.98293e-11	1.5091e-11	1.88304e-11	2.91252e-11
8.38	1.34259e-11	1.77671e-11	2.40074e-11	1.62623e-11	1.7383e-11	1.88516e-11	3.74292e-11	1.41433e-11	1.81598e-11	1.48761e-11	4.35654e-11	1.50097e-11	1.6882e-11	1.70024e-11	1.13151e-11	1.98318e-11	1.50839e-11	1.88348e-11	2.91305e-11
8.4	1.3429e-11	1.77623e-11	2.4006e-11	1.62624e-11	1.73793e-11	1.88455e-11	3.74289e-11	1.41392e-11	1.81546e-11	1.48795e-11	4.3563e-11	1.50052e-11	1.68838e-11	1.70027e-11	1.13136e-11	1.98305e-11	1.50906e-11	1.88329e-11	2.91374e-11
8.42	1.34248e-11	1.77706e-11	2.39992e-11	1.62591e-11	1.73808e-11	1.88497e-11	3.74299e-11	1.41426e-11	1.81545e-11	1.4876e-11	4.35572e-11	1.50092e-11	1.68832e-11	1.70069e-11	1.13136e-11	1.98343e-11	1.50907e-11	1.8837e-11	2.9141e-11
8.44	1.34257e-11	1.77673e-11	2.40093e-11	1.62601e-11	1.73866e-11	1.8853e-11	3.74307e-11	1.41331e-11	1.81616e-11	1.48781e-11	4.35608e-11	1.50109e-11	1.68851e-11	1.7007e-11	1.13107e-11	1.9835e-11	1.50872e-11	1.88339e-11	2.91242e-11
8.46	1.34251e-11	1.77665e-11	2.40076e-11	1.62602e-11	1.7385e-11	1.88482e-11	3.74299e-11	1.41209e-11	1.81553e-11	1.48809e-11	4.35707e-11	1.50132e-11	1.68876e-11	1.6998e-11	1.13152e-11	1.98297e-11	1.50875e-11	1.88345e-11	2.91284e-11
8.48	1.34184e-11	1.77624e-11	2.40148e-11	1.62666e-11	1.73862e-11	1.88538e-11	3.74308e-11	1.41195e-11	1.81578e-11	1.4876e-11	4.35503e-11	1.50062e-11	1.6892e-11	1.7007e-11	1.13151e-11	1.98293e-11	1.50868e-11	1.88334e-11	2.91204e-11
8.5	1.34213e-11	1.77662e-11	2.4028e-11	1.62619e-11	1.73787e-11	1.88508e-11	3.74327e-11	1.41279e-11	1.81603e-11	1.48757e-11	4.35479e-11	1.50068e-11	1.68939e-11	1.7001e-11	1.13169e-11	1.98358e-11	1.50807e-11	1.88397e-11	2.91306e-11
8.52	1.34217e-11	1.77683e-11	2.40105e-11	1.6268e-11	1.73817e-11	1.8853e-11	3.74305e-11	1.41245e-11	1.81602e-11	1.48801e-11	4.35664e-11	1.50089e-11	1.68875e-11	1.69992e-11	1.13165e-11	1.98324e-11	1.50832e-11	1.88391e-11	2.91387e-11
8.54	1.34217e-11	1.77642e-11	2.40162e-11	1.62644e-11	1.7379e-11	1.88499e-11	3.74333e-11	1.41285e-11	1.81606e-11	1.48782e-11	4.35557e-11	1.50079e-11	1.68894e-11	1.69964e-11	1.1314e-11	1.98308e-11	1.50884e-11	1.88378e-11	2.91215e-11
8.56	1.34131e-11	1.77675e-11	2.40212e-11	1.62669e-11	1.73845e-11	1.88457e-11	3.74247e-11	1.41202e-11	1.8158e-11	1.48811e-11	4.35624e-11	1.50022e-11	1.68841e-11	1.69935e-11	1.13158e-11	1.98302e-11	1.50884e-11	1.8839e-11	2.91306e-11
8.58	1.342e-11	1.77631e-11	2.4009e-11	1.62611e-11	1.73855e-11	1.88519e-11	3.74341e-11	1.41291e-11	1.81561e-11	1.48777e-11	4.3578e-11	1.50076e-11	1.6885e-11	1.69969e-11	1.13147e-11	1.98339e-11	1.50882e-11	1.88393e-11	2.91177e-11
8.6	1.34184e-11	1.77638e-11	2.40139e-11	1.62621e-11	1.73833e-11	1.88504e-11	3.74266e-11	1.41355e-11	1.81535e-11	1.48813e-11	4.35599e-11	1.50088e-11	1.68909e-11	1.70012e-11	1.13155e-11	1.98325e-11	1.50794e-11	1.88354e-11	2.91283e-11
8.62	1.34144e-11	1.77645e-11	2.40033e-11	1.62581e-11	1.73854e-11	1.88518e-11	3.74349e-11	1.41369e-11	1.81579e-11	1.48838e-11	4.35557e-11	1.50089e-11	1.68959e-11	1.70005e-11	1.13161e-11	1.98335e-11	1.50796e-11	1.88354e-11	2.91071e-11
8.64	1.34231e-11	1.77641e-11	2.4014e-11	1.62596e-11	1.73821e-11	1.88525e-11	3.74363e-11	1.41399e-11	1.81547e-11	1.48783e-11	4.35559e-11	1.50066e-11	1.68871e-11	1.69972e-11	1.13129e-11	1.98374e-11	1.50796e-11	1.88405e-11	2.91161e-11
8.66	1.34145e-11	1.77621e-11	2.40057e-11	1.62623e-11	1.73819e-11	1.88527e-11	3.74344e-11	1.41335e-11	1.81515e-11	1.48779e-11	4.35461e-11	1.50086e-11	1.6892e-11	1.69987e-11	1.13198e-11	1.98304e-11	1.50842e-11	1.8836e-11	2.9122e-11
8.68	1.34079e-11	1.77623e-11	2.40074e-11	1.62579e-11	1.73834e-11	1.88553e-11	3.74355e-11	1.41371e-11	1.81585e-11	1.48759e-11	4.3562e-11	1.50057e-11	1.68967e-11	1.7e-11	1.13166e-11	1.98332e-11	1.50831e-11	1.88359e-11	2.9117e-11
8.7	1.34151e-11	1.77658e-11	2.40009e-11	1.62647e-11	1.73874e-11	1.88556e-11	3.74313e-11	1.41387e-11	1.81591e-11	1.48773e-11	4.35537e-11	1.49974e-11	1.68914e-11	1.69938e-11	1.13162e-11	1.98306e-11	1.5083e-11	1.88336e-11	2.91271e-11
8.72	1.34159e-11	1.77675e-11	2.40192e-11	1.62621e-11	1.73858e-11	1.88543e-11	3.74316e-11	1.41341e-11	1.81613e-11	1.4881e-11	4.35516e-11	1.50085e-11	1.68908e-11	1.69989e-11	1.13191e-11	1.98339e-11	1.50812e-11	1.88336e-11	2.91115e-11
8.74	1.34088e-11	1.77691e-11	2.40092e-11	1.62612e-11	1.73837e-11	1.88507e-11	3.74327e-11	1.41313e-11	1.81603e-11	1.4882e-11	4.3563e-11	1.50087e-11	1.68919e-11	1.69964e-11	1.1316e-11	1.98287e-11	1.50849e-11	1.88397e-11	2.91214e-11
8.76	1.34091e-11	1.77717e-11	2.40186e-11	1.62655e-11	1.73862e-11	1.88505e-11	3.74384e-11	1.41314e-11	1.81571e-11	1.4878e-11	4.35598e-11	1.50103e-11	1.68916e-11	1.70001e-11	1.13175e-11	1.98367e-11	1.50843e-11	1.88334e-11	2.91071e-11
8.78	1.34073e-11	1.77662e-11	2.4019e-11	1.62634e-11	1.73833e-11	1.88501e-11	3.74435e-11	1.41262e-11	1.81604e-11	1.48776e-11	4.3559e-11	1.50059e-11	1.6889e-11	1.7001e-11	1.13178e-11	1.98323e-11	1.50828e-11	1.8841e-11	2.9116e-11
8.8	1.34106e-11	1.77624e-11	2.40166e-11	1.62606e-11	1.73846e-11	1.88557e-11	3.74402e-11	1.41391e-11	1.81602e-11	1.48792e-11	4.35563e-11	1.50084e-11	1.68924e-11	1.6995e-11	1.13162e-11	1.9835e-11	1.50824e-11	1.88412e-11	2.91192e-11
8.82	1.34085e-11	1.77696e-11	2.40092e-11	1.62619e-11	1.7382e-11	1.88531e-11	3.74423e-11	1.41291e-11	1.81589e-11	1.48803e-11	4.35474e-11	1.50083e-11	1.68906e-11	1.69981e-11	1.13166e-11	1.98311e-11	1.5088e-11	1.88486e-11	2.91246e-11
8.84	1.34126e-11	1.77613e-11	2.40136e-11	1.626e-11	1.73803e-11	1.88521e-11	3.74453e-11	1.4126e-11	1.81615e-11	1.48822e-11	4.35558e-11	1.50029e-11	1.68898e-11	1.69929e-11	1.13112e-11	1.98355e-11	1.50782e-11	1.88373e-11	2.91344e-11
8.86	1.34095e-11	1.77692e-11	2.40152e-11	1.62597e-11	1.73815e-11	1.88568e-11	3.74434e-11	1.4134e-11	1.81586e-11	1.48803e-11	4.35676e-11	1.50039e-11	1.68867e-11	1.70021e-11	1.13148e-11	1.98313e-11	1.50801e-11	1.88342e-11	2.91367e-11
8.88	1.34028e-11	1.77638e-11	2.40171e-11	1.62616e-11	1.73788e-11	1.8853e-11	3.74326e-11	1.41305e-11	1.81593e-11	1.48833e-11	4.35701e-11	1.50047e-11	1.68946e-11	1.69974e-11	1.13125e-11	1.98363e-11	1.50853e-11	1.88406e-11	2.91164e-11
8.9	1.34051e-11	1.77628e-11	2.40079e-11	1.62592e-11	1.73818e-11	1.88523e-11	3.74352e-11	1.41307e-11	1.81611e-11	1.48801e-11	4.35678e-11	1.50053e-11	1.68867e-11	1.70015e-11	1.13162e-11	1.98361e-11	1.50913e-11	1.88398e-11	2.91126e-11
8.92	1.34094e-11	1.77665e-11	2.40163e-11	1.62681e-11	1.73772e-11	1.88547e-11	3.74443e-11	1.41288e-11	1.81551e-11	1.48808e-11	4.35676e-11	1.50003e-11	1.68928e-11	1.69961e-11	1.13224e-11	1.98311e-11	1.50877e-11	1.88388e-11	2.91222e-11
8.94	1.34196e-11	1.77589e-11	2.40148e-11	1.6257e-11	1.73873e-11	1.88564e-11	3.74363e-11	1.41332e-11	1.8162e-11	1.48797e-11	4.35755e-11	1.49873e-11	1.68898e-11	1.69942e-11	1.13173e-11	1.98296e-11	1.50854e-11	1.88323e-11	2.91274e-11
8.96	1.34106e-11	1.77579e-11	2.40202e-11	1.62575e-11	1.73806e-11	1.88505e-11	3.74446e-11	1.41297e-11	1.81549e-11	1.48764e-11	4.358e-11	1.49791e-11	1.68913e-11	1.69948e-11	1.13171e-11	1.98307e-11	1.50854e-11	1.88337e-11	2.91205e-11
8.98	1.34074e-11	1.77619e-11	2.40164e-11	1.62615e-11	1.73825e-11	1.88532e-11	3.7445e-11	1.41234e-11	1.81594e-11	1.4878e-11	4.35603e-11	1.49825e-11	1.6892e-11	1.69913e-11	1.13165e-11	1.98288e-11	1.5091e-11	1.88381e-11	2.91219e-11
9	1.34105e-11	1.77646e-11	2.40099e-11	1.62669e-11	1.7386e-11	1.88552e-11	3.74441e-11	1.41336e-11	1.81551e-11	1.48813e-11	4.35657e-11	1.49849e-11	1.68924e-11	1.6994e-11	1.13172e-11	1.98256e-11	1.50885e-11	1.88323e-11	2.91227e-11
9.02	1.34097e-11	1.77642e-11	2.4009e-11	1.62619e-11	1.73786e-11	1.88544e-11	3.74405e-11	1.41363e-11	1.81548e-11	1.48805e-11	4.3572e-11	1.49746e-11	1.68891e-11	1.69906e-11	1.13135e-11	1.98327e-11	1.50877e-11	1.88341e-11	2.91355e-11
9.04	1.3411e-11	1.77633e-11	2.39993e-11	1.62655e-11	1.73808e-11	1.88505e-11	3.74454e-11	1.41355e-11	1.81569e-11	1.48807e-11	4.35703e-11	1.49235e-11	1.68885e-11	1.69551e-11	1.13187e-11	1.98282e-11	1.50895e-11	1.88427e-11	2.91159e-11
9.06	1.3407e-11	1.7769e-11	2.40138e-11	1.62624e-11	1.73774e-11	1.88546e-11	3.74448e-11	1.4136e-11	1.81593e-11	1.48815e-11	4.35666e-11	1.48908e-11	1.68924e-11	1.68709e-11	1.13118e-11	1.98292e-11	1.50921e-11	1.88393e-11	2.91207e-11
9.08	1.34083e-11	1.77652e-11	2.40007e-11	1.62636e-11	1.73825e-11	1.88558e-11	3.74437e-11	1.41321e-11	1.81634e-11	1.4878e-11	4.35697e-11	1.48812e-11	1.68986e-11	1.6812e-11	1.13192e-11	1.9827e-11	1.50935e-11	1.88355e-11	2.91204e-11
9.1	1.34091e-11	1.77585e-11	2.40111e-11	1.62639e-11	1.73854e-11	1.88543e-11	3.74455e-11	1.41386e-11	1.81567e-11	1.48823e-11	4.35591e-11	1.48799e-11	1.68908e-11	1.67893e-11	1.13116e-11	1.98278e-11	1.50922e-11	1.88466e-11	2.91308e-11
9.12	1.341e-11	1.77536e-11	2.40183e-11	1.62617e-11	1.73838e-11	1.88541e-11	3.74443e-11	1.41379e-11	1.81597e-11	1.48806e-11	4.3573e-11	1.48792e-11	1.68929e-11	1.67887e-11	1.13113e-11	1.98262e-11	1.50863e-11	1.88396e-11	2.91403e-11
9.14	1.34051e-11	1.77571e-11	2.40109e-11	1.62653e-11	1.73805e-11	1.88576e-11	3.74456e-11	1.4131e-11	1.81636e-11	1.48811e-11	4.35774e-11	1.48733e-11	1.68887e-11	1.67831e-11	1.13102e-11	1.98283e-11	1.50852e-11	1.88399e-11	2.91101e-11
9.16	1.34035e-11	1.77653e-11	2.40088e-11	1.62646e-11	1.73835e-11	1.88542e-11	3.74437e-11	1.41247e-11	1.81605e-11	1.4879e-11	4.3574e-11	1.48761e-11	1.68952e-11	1.67794e-11	1.13104e-11	1.9828e-11	1.50878e-11	1.8841e-11	2.91337e-11
9.18	1.34035e-11	1.77595e-11	2.4011e-11	1.62626e-11	1.73874e-11	1.88534e-11	3.74455e-11	1.4135e-11	1.81604e-11	1.48825e-11	4.35707e-11	1.48758e-11	1.68935e-11	1.67852e-11	1.13159e-11	1.98276e-11	1.50879e-11	1.88401e-11	2.91282e-11
9.2	1.34024e-11	1.77525e-11	2.40181e-11	1.62649e-11	1.73794e-11	1.88527e-11	3.74487e-11	1.41327e-11	1.8157e-11	1.48774e-11	4.35851e-11	1.48766e-11	1.68883e-11	1.67859e-11	1.13202e-11	1.98273e-11	1.50915e-11	1.88356e-11	2.91324e-11
9.22	1.33994e-11	1.77607e-11	2.40258e-11	1.62613e-11	1.73824e-11	1.88557e-11	3.74466e-11	1.41343e-11	1.8162e-11	1.48848e-11	4.35817e-11	1.4881e-11	1.68923e-11	1.67817e-11	1.13177e-11	1.98297e-11	1.50958e-11	1.8841e-11	2.91217e-11
9.24	1.34049e-11	1.7756e-11	2.40164e-11	1.62642e-11	1.7388e-11	1.88494e-11	3.74434e-11	1.41375e-11	1.81616e-11	1.48798e-11	4.35654e-11	1.48826e-11	1.689e-11	1.67848e-11	1.13177e-11	1.98259e-11	1.50891e-11	1.88361e-11	2.91162e-11
9.26	1.34044e-11	1.77615e-11	2.40161e-11	1.62619e-11	1.7383e-11	1.88552e-11	3.7446e-11	1.4134e-11	1.81568e-11	1.48859e-11	4.35782e-11	1.48739e-11	1.68931e-11	1.67844e-11	1.13141e-11	1.98292e-11	1.50914e-11	1.88388e-11	2.9106e-11
9.28	1.34034e-11	1.77603e-11	2.40185e-11	1.6262e-11	1.73856e-11	1.8856e-11	3.74432e-11	1.41332e-11	1.81604e-11	1.48799e-11	4.35766e-11	1.48776e-11	1.6894e-11	1.67865e-11	1.13162e-11	1.98305e-11	1.50867e-11	1.88439e-11	2.91085e-11
9.3	1.33995e-11	1.77578e-11	2.40143e-11	1.62654e-11	1.7377e-11	1.88549e-11	3.74531e-11	1.41347e-11	1.81578e-11	1.48808e-11	4.35735e-11	1.48779e-11	1.68924e-11	1.67835e-11	1.131e-11	1.98318e-11	1.50892e-11	1.88384e-11	2.91068e-11
9.32	1.34e-11	1.77568e-11	2.40203e-11	1.62641e-11	1.73791e-11	1.88575e-11	3.74346e-11	1.41272e-11	1.81649e-11	1.48795e-11	4.35759e-11	1.48756e-11	1.68821e-11	1.6785e-11	1.13112e-11	1.98285e-11	1.50912e-11	1.88388e-11	2.90998e-11
9.34	1.34006e-11	1.77498e-11	2.40144e-11	1.62604e-11	1.73819e-11	1.88585e-11	3.74542e-11	1.41215e-11	1.81587e-11	1.48777e-11	4.35968e-11	1.48722e-11	1.68933e-11	1.6782e-11	1.13173e-11	1.98322e-11	1.50955e-11	1.88386e-11	2.91151e-11
9.36	1.34016e-11	1.7755e-11	2.40144e-11	1.62625e-11	1.73813e-11	1.88531e-11	3.74508e-11	1.4124e-11	1.81608e-11	1.48865e-11	4.35703e-11	1.48702e-11	1.68912e-11	1.67842e-11	1.13126e-11	1.98325e-11	1.50903e-11	1.88392e-11	2.91079e-11
9.38	1.3401e-11	1.77532e-11	2.40211e-11	1.62664e-11	1.73868e-11	1.8854e-11	3.74511e-11	1.41298e-11	1.81582e-11	1.48805e-11	4.35758e-11	1.48723e-11	1.68886e-11	1.67761e-11	1.1313e-11	1.98327e-11	1.50842e-11	1.88397e-11	2.91133e-11
9.4	1.33934e-11	1.77567e-11	2.40083e-11	1.62654e-11	1.73848e-11	1.88521e-11	3.74523e-11	1.41306e-11	1.81616e-11	1.48822e-11	4.35781e-11	1.48674e-11	1.68915e-11	1.67818e-11	1.13157e-11	1.98363e-11	1.50874e-11	1.88381e-11	2.90981e-11
9.42	1.33942e-11	1.77618e-11	2.40078e-11	1.62685e-11	1.73805e-11	1.88535e-11	3.74462e-11	1.4127e-11	1.81611e-11	1.48826e-11	4.35771e-11	1.48711e-11	1.68917e-11	1.67742e-11	1.13118e-11	1.98284e-11	1.50897e-11	1.88414e-11	2.91144e-11
9.44	1.33917e-11	1.77615e-11	2.40039e-11	1.62631e-11	1.73816e-11	1.88583e-11	3.74497e-11	1.41198e-11	1.81552e-11	1.48846e-11	4.35758e-11	1.48684e-11	1.68931e-11	1.67758e-11	1.13097e-11	1.98327e-11	1.5088e-11	1.88395e-11	2.90911e-11
9.46	1.33964e-11	1.77574e-11	2.40287e-11	1.62641e-11	1.73765e-11	1.88528e-11	3.74488e-11	1.4128e-11	1.81612e-11	1.48829e-11	4.35743e-11	1.48645e-11	1.68888e-11	1.67715e-11	1.13141e-11	1.98341e-11	1.50879e-11	1.88386e-11	2.91082e-11
9.48	1.33887e-11	1.77554e-11	2.40221e-11	1.62622e-11	1.73835e-11	1.88536e-11	3.74546e-11	1.41282e-11	1.81616e-11	1.48803e-11	4.35727e-11	1.48606e-11	1.68935e-11	1.67726e-11	1.13083e-11	1.98283e-11	1.50897e-11	1.88422e-11	2.91083e-11
9.5	1.33952e-11	1.77604e-11	2.40175e-11	1.62641e-11	1.7384e-11	1.88538e-11	3.74423e-11	1.4129e-11	1.81548e-11	1.48812e-11	4.35754e-11	1.4864e-11	1.6893e-11	1.67736e-11	1.13115e-11	1.98286e-11	1.50897e-11	1.88352e-11	2.9105e-11
9.52	1.33951e-11	1.77605e-11	2.40177e-11	1.62686e-11	1.73817e-11	1.88581e-11	3.74492e-11	1.41264e-11	1.81614e-11	1.48859e-11	4.35697e-11	1.48608e-11	1.68889e-11	1.6764e-11	1.13163e-11	1.98261e-11	1.50913e-11	1.88396e-11	2.91238e-11
9.54	1.33973e-11	1.7754e-11	2.40158e-11	1.62602e-11	1.73845e-11	1.88545e-11	3.7449e-11	1.41278e-11	1.81592e-11	1.48814e-11	4.35777e-11	1.48604e-11	1.68876e-11	1.67602e-11	1.13078e-11	1.98333e-11	1.50895e-11	1.88329e-11	2.9102e-11
9.56	1.33995e-11	1.77688e-11	2.40252e-11	1.62706e-11	1.73787e-11	1.88538e-11	3.74544e-11	1.41226e-11	1.81634e-11	1.48845e-11	4.36015e-11	1.48597e-11	1.68923e-11	1.67633e-11	1.13048e-11	1.98339e-11	1.50903e-11	1.8839e-11	2.9125e-11
9.58	1.33984e-11	1.77547e-11	2.40296e-11	1.62574e-11	1.73802e-11	1.88564e-11	3.7453e-11	1.4127e-11	1.81601e-11	1.48812e-11	4.36016e-11	1.4857e-11	1.68949e-11	1.67641e-11	1.13081e-11	1.98323e-11	1.50898e-11	1.88385e-11	2.91096e-11
9.6	1.33954e-11	1.77618e-11	2.40304e-11	1.62607e-11	1.73859e-11	1.88557e-11	3.74563e-11	1.41295e-11	1.81577e-11	1.48834e-11	4.3579e-11	1.48606e-11	1.68911e-11	1.67586e-11	1.13059e-11	1.98392e-11	1.50884e-11	1.88379e-11	2.91116e-11
9.62	1.33935e-11	1.77592e-11	2.40157e-11	1.6261e-11	1.73815e-11	1.88575e-11	3.74534e-11	1.41266e-11	1.81581e-11	1.48786e-11	4.35836e-11	1.48525e-11	1.69e-11	1.6765e-11	1.13082e-11	1.98378e-11	1.50938e-11	1.88438e-11	2.91218e-11
9.64	1.33941e-11	1.77536e-11	2.4025e-11	1.62639e-11	1.73835e-11	1.88496e-11	3.74562e-11	1.41175e-11	1.81632e-11	1.48781e-11	4.35929e-11	1.48562e-11	1.68969e-11	1.67617e-11	1.13087e-11	1.98347e-11	1.50938e-11	1.88376e-11	2.9103e-11
9.66	1.33945e-11	1.77466e-11	2.40407e-11	1.62696e-11	1.73829e-11	1.88623e-11	3.74542e-11	1.413e-11	1.81565e-11	1.48854e-11	4.35987e-11	1.48532e-11	1.69015e-11	1.67592e-11	1.131e-11	1.98364e-11	1.50862e-11	1.88391e-11	2.90982e-11
9.68	1.33916e-11	1.77597e-11	2.4027e-11	1.62654e-11	1.73809e-11	1.88508e-11	3.74469e-11	1.41221e-11	1.81591e-11	1.48811e-11	4.35886e-11	1.48534e-11	1.68987e-11	1.67572e-11	1.13119e-11	1.98343e-11	1.50886e-11	1.88381e-11	2.90861e-11
9.7	1.33951e-11	1.77626e-11	2.40274e-11	1.62663e-11	1.73824e-11	1.8855e-11	3.74503e-11	1.41279e-11	1.81565e-11	1.48822e-11	4.35825e-11	1.48583e-11	1.68987e-11	1.67467e-11	1.13132e-11	1.98405e-11	1.50867e-11	1.88362e-11	2.9095e-11
9.72	1.33947e-11	1.775e-11	2.40294e-11	1.62672e-11	1.73847e-11	1.88526e-11	3.74587e-11	1.41298e-11	1.81558e-11	1.48833e-11	4.35813e-11	1.48529e-11	1.68973e-11	1.67512e-11	1.13117e-11	1.9835e-11	1.5091e-11	1.88381e-11	2.9091e-11
9.74	1.33971e-11	1.77586e-11	2.40261e-11	1.62658e-11	1.73827e-11	1.88561e-11	3.74571e-11	1.41336e-11	1.81616e-11	1.48849e-11	4.35888e-11	1.4853e-11	1.68988e-11	1.67466e-11	1.1317e-11	1.98367e-11	1.50879e-11	1.88369e-11	2.90867e-11
9.76	1.33938e-11	1.77555e-11	2.40378e-11	1.62682e-11	1.73815e-11	1.88582e-11	3.74546e-11	1.4128e-11	1.81604e-11	1.48812e-11	4.35835e-11	1.48502e-11	1.68976e-11	1.67505e-11	1.13086e-11	1.98308e-11	1.50821e-11	1.8836e-11	2.90858e-11
9.78	1.33948e-11	1.77517e-11	2.40289e-11	1.6259e-11	1.7383e-11	1.8854e-11	3.74588e-11	1.41237e-11	1.81685e-11	1.48833e-11	4.35832e-11	1.48499e-11	1.68999e-11	1.67504e-11	1.13114e-11	1.98368e-11	1.50891e-11	1.88405e-11	2.9096e-11
9.8	1.3389e-11	1.77476e-11	2.40282e-11	1.62633e-11	1.73873e-11	1.88548e-11	3.74617e-11	1.41227e-11	1.81594e-11	1.4881e-11	4.35814e-11	1.48502e-11	1.68986e-11	1.67442e-11	1.13118e-11	1.98347e-11	1.50866e-11	1.88396e-11	2.90826e-11
9.82	1.33904e-11	1.77512e-11	2.4029e-11	1.62696e-11	1.73824e-11	1.88577e-11	3.74575e-11	1.41213e-11	1.81607e-11	1.48843e-11	4.35953e-11	1.48536e-11	1.68992e-11	1.67475e-11	1.13142e-11	1.98309e-11	1.50877e-11	1.88349e-11	2.90974e-11
9.84	1.33945e-11	1.77472e-11	2.40243e-11	1.62671e-11	1.73781e-11	1.88569e-11	3.74604e-11	1.41187e-11	1.81612e-11	1.48811e-11	4.3597e-11	1.48515e-11	1.68946e-11	1.6741e-11	1.13078e-11	1.98409e-11	1.50847e-11	1.88398e-11	2.90985e-11
9.86	1.33908e-11	1.7748e-11	2.40244e-11	1.62653e-11	1.73819e-11	1.88588e-11	3.74566e-11	1.41247e-11	1.81611e-11	1.48849e-11	4.36008e-11	1.48485e-11	1.68968e-11	1.6741e-11	1.13172e-11	1.98351e-11	1.50883e-11	1.88437e-11	2.91048e-11
9.88	1.33947e-11	1.77648e-11	2.40174e-11	1.62617e-11	1.73824e-11	1.88558e-11	3.74626e-11	1.41237e-11	1.81577e-11	1.48844e-11	4.35986e-11	1.48483e-11	1.68995e-11	1.67429e-11	1.13121e-11	1.98458e-11	1.50813e-11	1.88418e-11	2.9079e-11
9.9	1.33888e-11	1.77672e-11	2.4025e-11	1.62672e-11	1.73825e-11	1.88577e-11	3.74603e-11	1.41186e-11	1.81562e-11	1.48839e-11	4.35908e-11	1.48505e-11	1.68954e-11	1.67427e-11	1.13112e-11	1.98417e-11	1.50896e-11	1.88392e-11	2.90716e-11
9.92	1.339e-11	1.7767e-11	2.40144e-11	1.62644e-11	1.73815e-11	1.88549e-11	3.74531e-11	1.41169e-11	1.81601e-11	1.48841e-11	4.36007e-11	1.48494e-11	1.68912e-11	1.67438e-11	1.13124e-11	1.98347e-11	1.50866e-11	1.88341e-11	2.90726e-11
9.94	1.33894e-11	1.77708e-11	2.40193e-11	1.62702e-11	1.73755e-11	1.8859e-11	3.74611e-11	1.41178e-11	1.81597e-11	1.48847e-11	4.35912e-11	1.48462e-11	1.68916e-11	1.6742e-11	1.13125e-11	1.98356e-11	1.5088e-11	1.88342e-11	2.90708e-11
9.96	1.33879e-11	1.77686e-11	2.4033e-11	1.62661e-11	1.73822e-11	1.88581e-11	3.74572e-11	1.41287e-11	1.81604e-11	1.48867e-11	4.35778e-11	1.48457e-11	1.68989e-11	1.67408e-11	1.13086e-11	1.98409e-11	1.50904e-11	1.88452e-11	2.90727e-11
9.98	1.33819e-11	1.77166e-11	2.4025e-11	1.62678e-11	1.73818e-11	1.88602e-11	3.74502e-11	1.41272e-11	1.81609e-11	1.48861e-11	4.35964e-11	1.48453e-11	1.68956e-11	1.67421e-11	1.13114e-11	1.98388e-11	1.50899e-11	1.88344e-11	2.90849e-11
10	1.33807e-11	1.76496e-11	2.40244e-11	1.62632e-11	1.73802e-11	1.88514e-11	3.74513e-11	1.4122e-11	1.81588e-11	1.48843e-11	4.36015e-11	1.48417e-11	1.69028e-11	1.67419e-11	1.13165e-11	1.98424e-11	1.50931e-11	1.88349e-11	2.90742e-11
10.02	1.33887e-11	1.76108e-11	2.402e-11	1.62677e-11	1.73811e-11	1.88521e-11	3.74599e-11	1.41221e-11	1.81618e-11	1.48833e-11	4.35821e-11	1.48441e-11	1.68961e-11	1.67354e-11	1.13081e-11	1.98492e-11	1.50916e-11	1.88376e-11	2.9064e-11
10.04	1.33874e-11	1.75921e-11	2.40312e-11	1.62676e-11	1.73795e-11	1.88506e-11	3.74597e-11	1.41223e-11	1.81622e-11	1.48852e-11	4.35996e-11	1.48474e-11	1.68978e-11	1.67374e-11	1.13123e-11	1.98393e-11	1.50897e-11	1.88411e-11	2.90762e-11
10.06	1.33875e-11	1.75817e-11	2.40171e-11	1.62681e-11	1.7383e-11	1.88542e-11	3.74612e-11	1.41175e-11	1.81601e-11	1.48861e-11	4.35992e-11	1.48464e-11	1.68986e-11	1.67395e-11	1.13106e-11	1.98417e-11	1.50917e-11	1.88372e-11	2.90497e-11
10.08	1.33867e-11	1.75741e-11	2.40246e-11	1.62665e-11	1.73772e-11	1.88491e-11	3.74601e-11	1.41275e-11	1.81599e-11	1.48839e-11	4.35858e-11	1.4845e-11	1.68932e-11	1.67385e-11	1.13078e-11	1.9836e-11	1.5095e-11	1.88444e-11	2.90665e-11
10.1	1.33807e-11	1.75784e-11	2.4023e-11	1.62632e-11	1.7376e-11	1.88516e-11	3.74633e-11	1.41268e-11	1.8162e-11	1.48839e-11	4.35959e-11	1.48463e-11	1.6896e-11	1.67376e-11	1.13117e-11	1.98405e-11	1.50921e-11	1.884e-11	2.90771e-11
10.12	1.33859e-11	1.75708e-11	2.40223e-11	1.62672e-11	1.73807e-11	1.88491e-11	3.74545e-11	1.41299e-11	1.81645e-11	1.48837e-11	4.35902e-11	1.48476e-11	1.68916e-11	1.67305e-11	1.13143e-11	1.98426e-11	1.50923e-11	1.88381e-11	2.9086e-11
10.14	1.33827e-11	1.75731e-11	2.40112e-11	1.62685e-11	1.73833e-11	1.88491e-11	3.74487e-11	1.41397e-11	1.81595e-11	1.4885e-11	4.35974e-11	1.48436e-11	1.69018e-11	1.67421e-11	1.13132e-11	1.98453e-11	1.50891e-11	1.88371e-11	2.90907e-11
10.16	1.33892e-11	1.75699e-11	2.40188e-11	1.62687e-11	1.7379e-11	1.88523e-11	3.7458e-11	1.41284e-11	1.81634e-11	1.48823e-11	4.36008e-11	1.48433e-11	1.68987e-11	1.67406e-11	1.13125e-11	1.984e-11	1.5093e-11	1.88433e-11	2.90951e-11
10.18	1.33813e-11	1.7572e-11	2.40171e-11	1.62684e-11	1.73812e-11	1.88452e-11	3.74592e-11	1.41308e-11	1.8165e-11	1.48859e-11	4.35981e-11	1.48472e-11	1.68949e-11	1.674e-11	1.13104e-11	1.98384e-11	1.50909e-11	1.88371e-11	2.90943e-11
10.2	1.33808e-11	1.75792e-11	2.40039e-11	1.62701e-11	1.73827e-11	1.88514e-11	3.74526e-11	1.41401e-11	1.81607e-11	1.48859e-11	4.35963e-11	1.48406e-11	1.69015e-11	1.67352e-11	1.13082e-11	1.98397e-11	1.50862e-11	1.88367e-11	2.90861e-11
10.22	1.33781e-11	1.75762e-11	2.40196e-11	1.62668e-11	1.73782e-11	1.88468e-11	3.74514e-11	1.41315e-11	1.81605e-11	1.48859e-11	4.35962e-11	1.48396e-11	1.69003e-11	1.67359e-11	1.13101e-11	1.98447e-11	1.50883e-11	1.88414e-11	2.90965e-11
10.24	1.3382e-11	1.75771e-11	2.40353e-11	1.62636e-11	1.73823e-11	1.88492e-11	3.7452e-11	1.41295e-11	1.81657e-11	1.48886e-11	4.36029e-11	1.48412e-11	1.69004e-11	1.6733e-11	1.13053e-11	1.98443e-11	1.5088e-11	1.88417e-11	2.91062e-11
10.26	1.3388e-11	1.75758e-11	2.40334e-11	1.62666e-11	1.73825e-11	1.88519e-11	3.74468e-11	1.41318e-11	1.81607e-11	1.4888e-11	4.36087e-11	1.48387e-11	1.68957e-11	1.67325e-11	1.13079e-11	1.98424e-11	1.50895e-11	1.88461e-11	2.91145e-11
10.28	1.33831e-11	1.75844e-11	2.40122e-11	1.6264e-11	1.73813e-11	1.88563e-11	3.74408e-11	1.41262e-11	1.81636e-11	1.48862e-11	4.35916e-11	1.48459e-11	1.6892e-11	1.67291e-11	1.13121e-11	1.98423e-11	1.50899e-11	1.88479e-11	2.91101e-11
10.3	1.33876e-11	1.75753e-11	2.40217e-11	1.6265e-11	1.73765e-11	1.88529e-11	3.74367e-11	1.41373e-11	1.81584e-11	1.48835e-11	4.35991e-11	1.48402e-11	1.68968e-11	1.67317e-11	1.13119e-11	1.98417e-11	1.50913e-11	1.8839e-11	2.90963e-11
10.32	1.33862e-11	1.75676e-11	2.40173e-11	1.62664e-11	1.73852e-11	1.8851e-11	3.74445e-11	1.41352e-11	1.81621e-11	1.48867e-11	4.36042e-11	1.48415e-11	1.68952e-11	1.67285e-11	1.13105e-11	1.98407e-11	1.50973e-11	1.88456e-11	2.90995e-11
10.34	1.33879e-11	1.75693e-11	2.40197e-11	1.62646e-11	1.73808e-11	1.88516e-11	3.74431e-11	1.41334e-11	1.81638e-11	1.48838e-11	4.36023e-11	1.4842e-11	1.68954e-11	1.67284e-11	1.13112e-11	1.98455e-11	1.50892e-11	1.88364e-11	2.91065e-11
10.36	1.33816e-11	1.75724e-11	2.40198e-11	1.62676e-11	1.73789e-11	1.88501e-11	3.74368e-11	1.41353e-11	1.81579e-11	1.48852e-11	4.35958e-11	1.4838e-11	1.69001e-11	1.67285e-11	1.13086e-11	1.98415e-11	1.50924e-11	1.88371e-11	2.90946e-11
10.38	1.33808e-11	1.75661e-11	2.40076e-11	1.62687e-11	1.73767e-11	1.88496e-11	3.74392e-11	1.4128e-11	1.81598e-11	1.48803e-11	4.35996e-11	1.48406e-11	1.68941e-11	1.67244e-11	1.13093e-11	1.98419e-11	1.50835e-11	1.88365e-11	2.91306e-11
10.4	1.3381e-11	1.75722e-11	2.40145e-11	1.62686e-11	1.73802e-11	1.88493e-11	3.74322e-11	1.41286e-11	1.81612e-11	1.48904e-11	4.36083e-11	1.48386e-11	1.68967e-11	1.67282e-11	1.13085e-11	1.98432e-11	1.50887e-11	1.8842e-11	2.9164e-11
10.42	1.33829e-11	1.75679e-11	2.40217e-11	1.62671e-11	1.73766e-11	1.88435e-11	3.7435e-11	1.41324e-11	1.8159e-11	1.48844e-11	4.35982e-11	1.48454e-11	1.68947e-11	1.67283e-11	1.13119e-11	1.98413e-11	1.50865e-11	1.88426e-11	2.91671e-11
10.44	1.33849e-11	1.75683e-11	2.40242e-11	1.62687e-11	1.73748e-11	1.88371e-11	3.74248e-11	1.413e-11	1.81618e-11	1.4887e-11	4.36067e-11	1.48363e-11	1.68929e-11	1.67279e-11	1.1314e-11	1.9844e-11	1.50871e-11	1.88396e-11	2.91449e-11
10.46	1.33816e-11	1.75681e-11	2.40154e-11	1.62684e-11	1.73801e-11	1.88385e-11	3.74206e-11	1.41297e-11	1.81596e-11	1.48829e-11	4.35945e-11	1.48349e-11	1.68954e-11	1.67277e-11	1.13102e-11	1.98473e-11	1.50852e-11	1.88429e-11	2.91817e-11
10.48	1.33828e-11	1.75671e-11	2.40147e-11	1.62726e-11	1.73759e-11	1.88462e-11	3.74217e-11	1.41278e-11	1.81614e-11	1.48896e-11	4.35977e-11	1.48355e-11	1.68959e-11	1.67263e-11	1.13136e-11	1.98422e-11	1.5081e-11	1.88382e-11	2.91892e-11
10.5	1.33837e-11	1.75673e-11	2.402e-11	1.62688e-11	1.73756e-11	1.88455e-11	3.74201e-11	1.41339e-11	1.81618e-11	1.48876e-11	4.36189e-11	1.48394e-11	1.68947e-11	1.67285e-11	1.13104e-11	1.98408e-11	1.50833e-11	1.88444e-11	2.92127e-11
10.52	1.33814e-11	1.75671e-11	2.40226e-11	1.62652e-11	1.73848e-11	1.88486e-11	3.74286e-11	1.41259e-11	1.8159e-11	1.48891e-11	4.35961e-11	1.48352e-11	1.68982e-11	1.67267e-11	1.13091e-11	1.98523e-11	1.50875e-11	1.88434e-11	2.91761e-11
10.54	1.33825e-11	1.75648e-11	2.40097e-11	1.62673e-11	1.73858e-11	1.88537e-11	3.74314e-11	1.41327e-11	1.8162e-11	1.48909e-11	4.36105e-11	1.48367e-11	1.68994e-11	1.67257e-11	1.13122e-11	1.9841e-11	1.50851e-11	1.8847e-11	2.90879e-11
10.56	1.33808e-11	1.75655e-11	2.40206e-11	1.62663e-11	1.73812e-11	1.8854e-11	3.743e-11	1.41308e-11	1.81622e-11	1.48865e-11	4.36088e-11	1.48417e-11	1.68942e-11	1.67264e-11	1.13081e-11	1.98442e-11	1.50934e-11	1.88409e-11	2.90832e-11
10.58	1.33781e-11	1.75549e-11	2.40146e-11	1.62707e-11	1.73829e-11	1.88524e-11	3.74315e-11	1.41241e-11	1.81641e-11	1.48862e-11	4.35956e-11	1.48371e-11	1.68984e-11	1.67263e-11	1.13152e-11	1.98426e-11	1.50862e-11	1.88339e-11	2.90774e-11
10.6	1.33819e-11	1.75613e-11	2.40309e-11	1.6266e-11	1.73811e-11	1.8856e-11	3.74309e-11	1.41281e-11	1.81604e-11	1.48859e-11	4.36105e-11	1.48392e-11	1.68942e-11	1.67293e-11	1.13179e-11	1.98438e-11	1.50909e-11	1.88476e-11	2.90666e-11
10.62	1.338e-11	1.75667e-11	2.40119e-11	1.62613e-11	1.73822e-11	1.88499e-11	3.74394e-11	1.41218e-11	1.81606e-11	1.48858e-11	4.36167e-11	1.48318e-11	1.69008e-11	1.67261e-11	1.13122e-11	1.98401e-11	1.50891e-11	1.88434e-11	2.90598e-11
10.64	1.33827e-11	1.75513e-11	2.40191e-11	1.62648e-11	1.7371e-11	1.88538e-11	3.7434e-11	1.4125e-11	1.81611e-11	1.48924e-11	4.36089e-11	1.48317e-11	1.68973e-11	1.67224e-11	1.13085e-11	1.98379e-11	1.50896e-11	1.88353e-11	2.90805e-11
10.66	1.33799e-11	1.75567e-11	2.40214e-11	1.62651e-11	1.73306e-11	1.8857e-11	3.7434e-11	1.41284e-11	1.81607e-11	1.48863e-11	4.3607e-11	1.48295e-11	1.68917e-11	1.67206e-11	1.13137e-11	1.98435e-11	1.50928e-11	1.88455e-11	2.90708e-11
10.68	1.33828e-11	1.75631e-11	2.40334e-11	1.62665e-11	1.72978e-11	1.88528e-11	3.74344e-11	1.41291e-11	1.81605e-11	1.48898e-11	4.36106e-11	1.48348e-11	1.68952e-11	1.67198e-11	1.13118e-11	1.98466e-11	1.50861e-11	1.88393e-11	2.90565e-11
10.7	1.33822e-11	1.75586e-11	2.40316e-11	1.62664e-11	1.72648e-11	1.88499e-11	3.74401e-11	1.41349e-11	1.81651e-11	1.48929e-11	4.35976e-11	1.48358e-11	1.69044e-11	1.67222e-11	1.13125e-11	1.98392e-11	1.50861e-11	1.88464e-11	2.90727e-11
10.72	1.33817e-11	1.75588e-11	2.40153e-11	1.62684e-11	1.72503e-11	1.88585e-11	3.74356e-11	1.413e-11	1.81588e-11	1.48891e-11	4.35868e-11	1.48309e-11	1.68972e-11	1.6721e-11	1.13082e-11	1.98461e-11	1.50931e-11	1.88341e-11	2.90593e-11
10.74	1.33835e-11	1.75585e-11	2.40088e-11	1.62657e-11	1.72401e-11	1.88585e-11	3.74278e-11	1.41319e-11	1.8156e-11	1.48905e-11	4.36041e-11	1.48321e-11	1.68976e-11	1.6721e-11	1.13121e-11	1.98442e-11	1.50916e-11	1.88387e-11	2.90781e-11
10.76	1.33806e-11	1.75626e-11	2.40079e-11	1.62645e-11	1.72309e-11	1.88542e-11	3.74322e-11	1.41348e-11	1.81654e-11	1.48878e-11	4.35926e-11	1.48281e-11	1.68961e-11	1.67155e-11	1.13201e-11	1.98397e-11	1.50946e-11	1.88312e-11	2.90687e-11
10.78	1.33776e-11	1.75504e-11	2.40263e-11	1.62638e-11	1.72358e-11	1.88531e-11	3.74353e-11	1.41361e-11	1.81622e-11	1.48901e-11	4.35977e-11	1.48327e-11	1.68951e-11	1.67207e-11	1.13113e-11	1.98419e-11	1.50918e-11	1.88313e-11	2.90762e-11
10.8	1.3378e-11	1.75564e-11	2.40172e-11	1.62635e-11	1.72304e-11	1.88533e-11	3.74424e-11	1.41353e-11	1.81628e-11	1.48855e-11	4.36013e-11	1.4831e-11	1.68953e-11	1.67224e-11	1.13168e-11	1.98383e-11	1.50948e-11	1.8839e-11	2.90679e-11
10.82	1.33811e-11	1.7555e-11	2.40222e-11	1.62643e-11	1.72353e-11	1.88535e-11	3.7435e-11	1.41252e-11	1.81662e-11	1.48913e-11	4.36079e-11	1.48302e-11	1.6898e-11	1.67208e-11	1.13129e-11	1.98436e-11	1.50985e-11	1.88378e-11	2.90747e-11
10.84	1.33824e-11	1.75615e-11	2.40295e-11	1.62664e-11	1.72337e-11	1.88572e-11	3.74327e-11	1.4127e-11	1.81609e-11	1.48855e-11	4.36036e-11	1.48304e-11	1.68975e-11	1.67196e-11	1.13183e-11	1.98426e-11	1.50937e-11	1.88336e-11	2.90868e-11
10.86	1.33814e-11	1.75554e-11	2.40258e-11	1.6262e-11	1.72383e-11	1.88559e-11	3.74355e-11	1.41355e-11	1.81568e-11	1.48874e-11	4.36278e-11	1.48327e-11	1.68957e-11	1.67254e-11	1.13173e-11	1.98425e-11	1.50987e-11	1.88337e-11	2.90851e-11
10.88	1.33822e-11	1.75621e-11	2.40261e-11	1.62717e-11	1.72379e-11	1.88512e-11	3.74332e-11	1.41344e-11	1.81613e-11	1.4891e-11	4.35899e-11	1.483e-11	1.68936e-11	1.67193e-11	1.13132e-11	1.98465e-11	1.50941e-11	1.88445e-11	2.90886e-11
10.9	1.33808e-11	1.75588e-11	2.40208e-11	1.62693e-11	1.72342e-11	1.88581e-11	3.74396e-11	1.41291e-11	1.81646e-11	1.48898e-11	4.35979e-11	1.48364e-11	1.69009e-11	1.67233e-11	1.13098e-11	1.98454e-11	1.50921e-11	1.88358e-11	2.9078e-11
10.92	1.33825e-11	1.75579e-11	2.40227e-11	1.62729e-11	1.72341e-11	1.88523e-11	3.74272e-11	1.4132e-11	1.81604e-11	1.48926e-11	4.35892e-11	1.48331e-11	1.69028e-11	1.67156e-11	1.13139e-11	1.98436e-11	1.50979e-11	1.88307e-11	2.90777e-11
10.94	1.33774e-11	1.75575e-11	2.40148e-11	1.62672e-11	1.7239e-11	1.88553e-11	3.74257e-11	1.41353e-11	1.81622e-11	1.48876e-11	4.36008e-11	1.4831e-11	1.68984e-11	1.67177e-11	1.13091e-11	1.98447e-11	1.50918e-11	1.88365e-11	2.90605e-11
10.96	1.33793e-11	1.75543e-11	2.40217e-11	1.62716e-11	1.72374e-11	1.88528e-11	3.74249e-11	1.41293e-11	1.81625e-11	1.48824e-11	4.36042e-11	1.48302e-11	1.68941e-11	1.67157e-11	1.13137e-11	1.98504e-11	1.50938e-11	1.88348e-11	2.9076e-11
10.98	1.33786e-11	1.75562e-11	2.4021e-11	1.62724e-11	1.72388e-11	1.88572e-11	3.74271e-11	1.41325e-11	1.81625e-11	1.48871e-11	4.35993e-11	1.48338e-11	1.68959e-11	1.67154e-11	1.13153e-11	1.98443e-11	1.50997e-11	1.88381e-11	2.90666e-11
11	1.33834e-11	1.75524e-11	2.40335e-11	1.62681e-11	1.72373e-11	1.88555e-11	3.74311e-11	1.41285e-11	1.8164e-11	1.48837e-11	4.34994e-11	1.48321e-11	1.6901e-11	1.67119e-11	1.13151e-11	1.9843e-11	1.50971e-11	1.88331e-11	2.90663e-11
11.02	1.3386e-11	1.7549e-11	2.40277e-11	1.62717e-11	1.72311e-11	1.88516e-11	3.74395e-11	1.41378e-11	1.81622e-11	1.48856e-11	4.33111e-11	1.48293e-11	1.69026e-11	1.6712e-11	1.1316e-11	1.98408e-11	1.50946e-11	1.88287e-11	2.90739e-11
11.04	1.33779e-11	1.75507e-11	2.40259e-11	1.62745e-11	1.72338e-11	1.88575e-11	3.74242e-11	1.41357e-11	1.8165e-11	1.48907e-11	4.31988e-11	1.48306e-11	1.69028e-11	1.67121e-11	1.13087e-11	1.98441e-11	1.50927e-11	1.88395e-11	2.90897e-11
11.06	1.33832e-11	1.75496e-11	2.40353e-11	1.62715e-11	1.72335e-11	1.88559e-11	3.74312e-11	1.41296e-11	1.81629e-11	1.4883e-11	4.31559e-11	1.48278e-11	1.69021e-11	1.67167e-11	1.13172e-11	1.98456e-11	1.50986e-11	1.88344e-11	2.90896e-11
11.08	1.33807e-11	1.7549e-11	2.40282e-11	1.62709e-11	1.72388e-11	1.88528e-11	3.74226e-11	1.41333e-11	1.81655e-11	1.48842e-11	4.31172e-11	1.48282e-11	1.68988e-11	1.67152e-11	1.13127e-11	1.98414e-11	1.50971e-11	1.88342e-11	2.90801e-11
11.1	1.3388e-11	1.75494e-11	2.40206e-11	1.627e-11	1.7228e-11	1.8853e-11	3.74275e-11	1.41266e-11	1.81649e-11	1.48892e-11	4.30976e-11	1.48262e-11	1.68962e-11	1.67155e-11	1.13176e-11	1.98482e-11	1.50925e-11	1.88328e-11	2.90984e-11
11.12	1.33778e-11	1.75542e-11	2.40157e-11	1.6271e-11	1.7231e-11	1.88567e-11	3.74272e-11	1.41331e-11	1.81574e-11	1.48869e-11	4.31048e-11	1.48256e-11	1.69061e-11	1.67178e-11	1.13105e-11	1.98443e-11	1.50976e-11	1.88357e-11	2.90761e-11
11.14	1.33774e-11	1.75486e-11	2.40299e-11	1.62649e-11	1.72323e-11	1.88544e-11	3.74225e-11	1.41247e-11	1.81629e-11	1.48879e-11	4.30965e-11	1.48263e-11	1.69016e-11	1.672e-11	1.13077e-11	1.98485e-11	1.51015e-11	1.88425e-11	2.90929e-11
11.16	1.33796e-11	1.75473e-11	2.40299e-11	1.62672e-11	1.72333e-11	1.88427e-11	3.74259e-11	1.41254e-11	1.81675e-11	1.48908e-11	4.3089e-11	1.48296e-11	1.69031e-11	1.67202e-11	1.13116e-11	1.98455e-11	1.50969e-11	1.88283e-11	2.90852e-11
11.18	1.33812e-11	1.75555e-11	2.40224e-11	1.62681e-11	1.723e-11	1.88453e-11	3.74236e-11	1.41331e-11	1.81673e-11	1.48871e-11	4.30805e-11	1.48215e-11	1.68992e-11	1.67129e-11	1.13087e-11	1.98468e-11	1.51023e-11	1.88268e-11	2.90835e-11
11.2	1.33818e-11	1.75492e-11	2.40194e-11	1.62678e-11	1.72347e-11	1.88447e-11	3.74299e-11	1.4124e-11	1.81633e-11	1.48886e-11	4.30952e-11	1.48341e-11	1.68959e-11	1.67176e-11	1.13135e-11	1.98523e-11	1.50973e-11	1.8834e-11	2.90746e-11
11.22	1.3383e-11	1.75569e-11	2.40278e-11	1.62735e-11	1.72317e-11	1.88567e-11	3.74323e-11	1.41338e-11	1.81656e-11	1.48845e-11	4.3092e-11	1.48251e-11	1.68959e-11	1.67148e-11	1.1315e-11	1.98492e-11	1.50919e-11	1.88378e-11	2.90782e-11
11.24	1.33782e-11	1.75501e-11	2.40224e-11	1.62683e-11	1.72276e-11	1.88585e-11	3.74282e-11	1.41355e-11	1.81649e-11	1.48899e-11	4.30908e-11	1.48261e-11	1.68944e-11	1.67157e-11	1.13128e-11	1.98505e-11	1.50976e-11	1.88365e-11	2.90879e-11
11.26	1.3376e-11	1.7551e-11	2.40157e-11	1.62633e-11	1.72323e-11	1.88553e-11	3.74152e-11	1.41283e-11	1.81674e-11	1.48891e-11	4.30845e-11	1.48297e-11	1.68957e-11	1.67151e-11	1.13092e-11	1.98516e-11	1.50941e-11	1.88382e-11	2.90865e-11
11.28	1.33847e-11	1.75544e-11	2.40288e-11	1.62693e-11	1.72322e-11	1.88473e-11	3.74204e-11	1.41309e-11	1.81614e-11	1.48889e-11	4.30898e-11	1.48266e-11	1.68949e-11	1.67138e-11	1.13139e-11	1.98497e-11	1.50927e-11	1.88342e-11	2.90688e-11
11.3	1.33795e-11	1.75542e-11	2.40325e-11	1.62713e-11	1.72337e-11	1.8848e-11	3.74265e-11	1.41252e-11	1.81638e-11	1.48886e-11	4.30917e-11	1.48276e-11	1.68891e-11	1.67142e-11	1.13162e-11	1.98449e-11	1.50896e-11	1.8841e-11	2.90768e-11
11.32	1.33805e-11	1.75533e-11	2.40211e-11	1.62699e-11	1.72335e-11	1.88565e-11	3.7419e-11	1.41292e-11	1.81644e-11	1.48903e-11	4.30797e-11	1.48247e-11	1.68927e-11	1.67193e-11	1.13161e-11	1.98479e-11	1.5093e-11	1.8836e-11	2.90785e-11
11.34	1.33794e-11	1.75506e-11	2.40248e-11	1.62711e-11	1.7233e-11	1.88519e-11	3.74163e-11	1.41336e-11	1.81702e-11	1.48903e-11	4.30978e-11	1.48249e-11	1.68961e-11	1.67122e-11	1.13092e-11	1.98477e-11	1.5095e-11	1.8834e-11	2.90797e-11
11.36	1.33811e-11	1.75543e-11	2.4016e-11	1.6273e-11	1.72261e-11	1.88565e-11	3.74259e-11	1.4126e-11	1.81673e-11	1.48913e-11	4.30926e-11	1.48265e-11	1.68929e-11	1.67165e-11	1.13144e-11	1.98499e-11	1.51014e-11	1.88343e-11	2.90777e-11
11.38	1.33809e-11	1.75434e-11	2.40186e-11	1.62687e-11	1.72239e-11	1.88539e-11	3.74286e-11	1.41227e-11	1.81639e-11	1.48888e-11	4.3092e-11	1.48294e-11	1.68917e-11	1.67118e-11	1.13123e-11	1.98465e-11	1.50915e-11	1.88373e-11	2.90846e-11
11.4	1.33821e-11	1.75442e-11	2.40202e-11	1.62724e-11	1.72302e-11	1.88507e-11	3.74233e-11	1.41274e-11	1.81675e-11	1.4888e-11	4.30919e-11	1.48287e-11	1.68941e-11	1.6715e-11	1.13155e-11	1.98476e-11	1.50935e-11	1.88363e-11	2.90983e-11
11.42	1.338e-11	1.75448e-11	2.40283e-11	1.62728e-11	1.72269e-11	1.88563e-11	3.74139e-11	1.41259e-11	1.81639e-11	1.48865e-11	4.30923e-11	1.48219e-11	1.6895e-11	1.67086e-11	1.13066e-11	1.98498e-11	1.50915e-11	1.88384e-11	2.90873e-11
11.44	1.33828e-11	1.75494e-11	2.40303e-11	1.62704e-11	1.72273e-11	1.88554e-11	3.74184e-11	1.41223e-11	1.81646e-11	1.48921e-11	4.30968e-11	1.48227e-11	1.68943e-11	1.67111e-11	1.13117e-11	1.98488e-11	1.50908e-11	1.8837e-11	2.90831e-11
11.46	1.33826e-11	1.75442e-11	2.40311e-11	1.62736e-11	1.72307e-11	1.88585e-11	3.74153e-11	1.41232e-11	1.81694e-11	1.48899e-11	4.30891e-11	1.48237e-11	1.68917e-11	1.6712e-11	1.13093e-11	1.98509e-11	1.50922e-11	1.88357e-11	2.90849e-11
11.48	1.33791e-11	1.75473e-11	2.40365e-11	1.62733e-11	1.72296e-11	1.88564e-11	3.74101e-11	1.41221e-11	1.81695e-11	1.4888e-11	4.30937e-11	1.48242e-11	1.68747e-11	1.67114e-11	1.13112e-11	1.98469e-11	1.50907e-11	1.88429e-11	2.90804e-11
11.5	1.33748e-11	1.75447e-11	2.40222e-11	1.62748e-11	1.72268e-11	1.8854e-11	3.74141e-11	1.41258e-11	1.8171e-11	1.48868e-11	4.31026e-11	1.48224e-11	1.68749e-11	1.67081e-11	1.13102e-11	1.98511e-11	1.50974e-11	1.88336e-11	2.90758e-11
11.52	1.33777e-11	1.75468e-11	2.40289e-11	1.62681e-11	1.72267e-11	1.8853e-11	3.74173e-11	1.4125e-11	1.81696e-11	1.48914e-11	4.30965e-11	1.48316e-11	1.68827e-11	1.67077e-11	1.13166e-11	1.98435e-11	1.50993e-11	1.88348e-11	2.90707e-11
11.54	1.33757e-11	1.7546e-11	2.40196e-11	1.62717e-11	1.72271e-11	1.88567e-11	3.74136e-11	1.4128e-11	1.81702e-11	1.4889e-11	4.31097e-11	1.48276e-11	1.68863e-11	1.67105e-11	1.13105e-11	1.98522e-11	1.50965e-11	1.88355e-11	2.90658e-11
11.56	1.33823e-11	1.75459e-11	2.40279e-11	1.62709e-11	1.72226e-11	1.88571e-11	3.74203e-11	1.41276e-11	1.81683e-11	1.48875e-11	4.31101e-11	1.48243e-11	1.6888e-11	1.67075e-11	1.13157e-11	1.98525e-11	1.50919e-11	1.88391e-11	2.90561e-11
11.58	1.33814e-11	1.75432e-11	2.40236e-11	1.62722e-11	1.72197e-11	1.88572e-11	3.74171e-11	1.41291e-11	1.81667e-11	1.48854e-11	4.31131e-11	1.48236e-11	1.68904e-11	1.67102e-11	1.13105e-11	1.98515e-11	1.50911e-11	1.88419e-11	2.90493e-11
11.6	1.3374e-11	1.75443e-11	2.40359e-11	1.6273e-11	1.72262e-11	1.88548e-11	3.74172e-11	1.41273e-11	1.81674e-11	1.48858e-11	4.30889e-11	1.48243e-11	1.68956e-11	1.67124e-11	1.13138e-11	1.98492e-11	1.50944e-11	1.88388e-11	2.9056e-11
11.62	1.3379e-11	1.75456e-11	2.40293e-11	1.62691e-11	1.72239e-11	1.88523e-11	3.7417e-11	1.41286e-11	1.81719e-11	1.48911e-11	4.30889e-11	1.48256e-11	1.68956e-11	1.6706e-11	1.13086e-11	1.98526e-11	1.50938e-11	1.88423e-11	2.90616e-11
11.64	1.33794e-11	1.75483e-11	2.40255e-11	1.62684e-11	1.72192e-11	1.88574e-11	3.74176e-11	1.41339e-11	1.81681e-11	1.48894e-11	4.3082e-11	1.4821e-11	1.68924e-11	1.67079e-11	1.13127e-11	1.9849e-11	1.50961e-11	1.88334e-11	2.90647e-11
11.66	1.33767e-11	1.7548e-11	2.40409e-11	1.62681e-11	1.72222e-11	1.88512e-11	3.74202e-11	1.41291e-11	1.81661e-11	1.48895e-11	4.3095e-11	1.48248e-11	1.68899e-11	1.67104e-11	1.13136e-11	1.98541e-11	1.50879e-11	1.88407e-11	2.90733e-11
11.68	1.33791e-11	1.75469e-11	2.40299e-11	1.62746e-11	1.72215e-11	1.88457e-11	3.74202e-11	1.41307e-11	1.81709e-11	1.48925e-11	4.30937e-11	1.48254e-11	1.6896e-11	1.67092e-11	1.13129e-11	1.9852e-11	1.50944e-11	1.88394e-11	2.90602e-11
11.7	1.33809e-11	1.75467e-11	2.40277e-11	1.62708e-11	1.72242e-11	1.88398e-11	3.74229e-11	1.41193e-11	1.81686e-11	1.48897e-11	4.30938e-11	1.48233e-11	1.68922e-11	1.67093e-11	1.13182e-11	1.98493e-11	1.50943e-11	1.88411e-11	2.90718e-11
11.72	1.33816e-11	1.75417e-11	2.40277e-11	1.62669e-11	1.72284e-11	1.88321e-11	3.74284e-11	1.41286e-11	1.81659e-11	1.48914e-11	4.30897e-11	1.48182e-11	1.68864e-11	1.67051e-11	1.13141e-11	1.98512e-11	1.50937e-11	1.88397e-11	2.90704e-11
11.74	1.33797e-11	1.75423e-11	2.4036e-11	1.62711e-11	1.72199e-11	1.88377e-11	3.74272e-11	1.41257e-11	1.81694e-11	1.4895e-11	4.30761e-11	1.48212e-11	1.68877e-11	1.67118e-11	1.1317e-11	1.98513e-11	1.50955e-11	1.88448e-11	2.90664e-11
11.76	1.33825e-11	1.75463e-11	2.40371e-11	1.62745e-11	1.7223e-11	1.88297e-11	3.74194e-11	1.41255e-11	1.81653e-11	1.48875e-11	4.30703e-11	1.48226e-11	1.689e-11	1.6716e-11	1.1316e-11	1.9852e-11	1.50973e-11	1.88377e-11	2.90695e-11
11.78	1.33769e-11	1.75425e-11	2.40315e-11	1.62731e-11	1.72237e-11	1.88287e-11	3.7423e-11	1.41217e-11	1.81689e-11	1.48869e-11	4.30946e-11	1.48177e-11	1.68949e-11	1.67068e-11	1.13172e-11	1.98539e-11	1.51009e-11	1.88401e-11	2.90686e-11
11.8	1.33771e-11	1.754e-11	2.40279e-11	1.62689e-11	1.72192e-11	1.88269e-11	3.74186e-11	1.41365e-11	1.81698e-11	1.48876e-11	4.30871e-11	1.48218e-11	1.68944e-11	1.67079e-11	1.13102e-11	1.98574e-11	1.51005e-11	1.8832e-11	2.90694e-11
11.82	1.33808e-11	1.75419e-11	2.40273e-11	1.62666e-11	1.72251e-11	1.88273e-11	3.74208e-11	1.41323e-11	1.81731e-11	1.48925e-11	4.30845e-11	1.48188e-11	1.68934e-11	1.6703e-11	1.13146e-11	1.98553e-11	1.5098e-11	1.88387e-11	2.90658e-11
11.84	1.33746e-11	1.75361e-11	2.40263e-11	1.62668e-11	1.72223e-11	1.88298e-11	3.74278e-11	1.41262e-11	1.81693e-11	1.48857e-11	4.30924e-11	1.48183e-11	1.68886e-11	1.67029e-11	1.13137e-11	1.98484e-11	1.50998e-11	1.88332e-11	2.9077e-11
11.86	1.33789e-11	1.75421e-11	2.40318e-11	1.6273e-11	1.72191e-11	1.88414e-11	3.74243e-11	1.41275e-11	1.8175e-11	1.48887e-11	4.3085e-11	1.4816e-11	1.68992e-11	1.67065e-11	1.13121e-11	1.98532e-11	1.50982e-11	1.88347e-11	2.90783e-11
11.88	1.33816e-11	1.75446e-11	2.40228e-11	1.62655e-11	1.7222e-11	1.88386e-11	3.74286e-11	1.41297e-11	1.81706e-11	1.48898e-11	4.30885e-11	1.48213e-11	1.69016e-11	1.67111e-11	1.13081e-11	1.98538e-11	1.50942e-11	1.88399e-11	2.90784e-11
11.9	1.33833e-11	1.75474e-11	2.40283e-11	1.62732e-11	1.72207e-11	1.8835e-11	3.74254e-11	1.41301e-11	1.81703e-11	1.48905e-11	4.30872e-11	1.48214e-11	1.69059e-11	1.67085e-11	1.13118e-11	1.98482e-11	1.51004e-11	1.8842e-11	2.90759e-11
11.92	1.33698e-11	1.75482e-11	2.40287e-11	1.62673e-11	1.72222e-11	1.8828e-11	3.74242e-11	1.41256e-11	1.81694e-11	1.48889e-11	4.30805e-11	1.48242e-11	1.69073e-11	1.67102e-11	1.13118e-11	1.98513e-11	1.50981e-11	1.88364e-11	2.90797e-11
11.94	1.33764e-11	1.75467e-11	2.40238e-11	1.62706e-11	1.72155e-11	1.88323e-11	3.74267e-11	1.41303e-11	1.81708e-11	1.48916e-11	4.30731e-11	1.48199e-11	1.68952e-11	1.67089e-11	1.13144e-11	1.98508e-11	1.50969e-11	1.88407e-11	2.907e-11
11.96	1.33734e-11	1.75546e-11	2.40193e-11	1.62744e-11	1.7221e-11	1.88287e-11	3.74253e-11	1.41348e-11	1.81666e-11	1.48933e-11	4.30895e-11	1.48161e-11	1.69009e-11	1.67104e-11	1.13094e-11	1.98531e-11	1.50947e-11	1.8838e-11	2.90782e-11
11.98	1.33758e-11	1.75455e-11	2.40327e-11	1.62701e-11	1.72173e-11	1.8828e-11	3.74255e-11	1.41213e-11	1.81668e-11	1.48893e-11	4.30863e-11	1.48163e-11	1.69022e-11	1.67089e-11	1.13142e-11	1.98512e-11	1.50983e-11	1.88311e-11	2.90555e-11
12	1.3379e-11	1.75436e-11	2.40299e-11	1.6273e-11	1.72186e-11	1.88115e-11	3.74308e-11	1.41229e-11	1.81686e-11	1.48885e-11	4.3073e-11	1.48142e-11	1.69013e-11	1.67109e-11	1.13113e-11	1.98571e-11	1.50913e-11	1.88327e-11	2.90752e-11
12.02	1.33794e-11	1.75427e-11	2.40333e-11	1.62596e-11	1.72228e-11	1.87525e-11	3.74255e-11	1.41259e-11	1.81689e-11	1.48904e-11	4.30849e-11	1.48188e-11	1.69062e-11	1.67051e-11	1.13135e-11	1.98476e-11	1.50935e-11	1.88399e-11	2.90798e-11
12.04	1.33754e-11	1.75375e-11	2.40264e-11	1.62768e-11	1.72218e-11	1.86983e-11	3.74322e-11	1.41242e-11	1.81706e-11	1.48904e-11	4.30652e-11	1.48175e-11	1.69026e-11	1.6706e-11	1.13103e-11	1.98468e-11	1.5095e-11	1.8843e-11	2.90801e-11
12.06	1.33717e-11	1.75442e-11	2.40234e-11	1.62693e-11	1.72237e-11	1.86705e-11	3.74271e-11	1.41231e-11	1.81696e-11	1.48904e-11	4.30664e-11	1.48151e-11	1.6907e-11	1.67018e-11	1.13121e-11	1.9855e-11	1.50981e-11	1.88401e-11	2.90889e-11
12.08	1.33775e-11	1.75431e-11	2.40305e-11	1.62729e-11	1.72162e-11	1.86606e-11	3.74313e-11	1.41235e-11	1.81706e-11	1.48972e-11	4.30599e-11	1.48176e-11	1.69028e-11	1.67045e-11	1.13144e-11	1.98551e-11	1.50922e-11	1.88346e-11	2.90775e-11
12.1	1.33765e-11	1.75376e-11	2.40285e-11	1.62717e-11	1.72191e-11	1.86586e-11	3.74255e-11	1.41263e-11	1.81677e-11	1.48939e-11	4.30897e-11	1.48196e-11	1.69016e-11	1.67037e-11	1.13109e-11	1.98536e-11	1.50965e-11	1.88364e-11	2.9076e-11
12.12	1.33787e-11	1.75444e-11	2.4018e-11	1.62725e-11	1.7228e-11	1.86509e-11	3.74287e-11	1.41257e-11	1.81722e-11	1.48903e-11	4.30683e-11	1.48179e-11	1.69085e-11	1.67013e-11	1.13087e-11	1.98527e-11	1.5099e-11	1.88362e-11	2.90738e-11
12.14	1.33784e-11	1.7549e-11	2.40252e-11	1.62699e-11	1.72222e-11	1.86505e-11	3.74305e-11	1.41262e-11	1.81705e-11	1.48912e-11	4.30644e-11	1.48188e-11	1.69022e-11	1.67054e-11	1.13151e-11	1.98528e-11	1.51007e-11	1.88434e-11	2.90749e-11
12.16	1.33797e-11	1.75411e-11	2.40371e-11	1.62734e-11	1.72218e-11	1.86558e-11	3.74283e-11	1.41252e-11	1.81707e-11	1.4895e-11	4.3082e-11	1.48171e-11	1.69092e-11	1.67032e-11	1.1313e-11	1.98589e-11	1.51016e-11	1.88482e-11	2.90846e-11
12.18	1.33797e-11	1.75364e-11	2.40358e-11	1.62666e-11	1.72222e-11	1.86563e-11	3.74323e-11	1.41319e-11	1.817e-11	1.48895e-11	4.30727e-11	1.48186e-11	1.69029e-11	1.67075e-11	1.1312e-11	1.98486e-11	1.50947e-11	1.8835e-11	2.90919e-11
12.2	1.338e-11	1.75375e-11	2.40429e-11	1.62728e-11	1.72215e-11	1.86609e-11	3.74342e-11	1.41387e-11	1.81718e-11	1.48941e-11	4.30612e-11	1.48143e-11	1.69047e-11	1.67163e-11	1.13105e-11	1.98496e-11	1.50979e-11	1.88385e-11	2.90945e-11
12.22	1.33843e-11	1.75366e-11	2.40249e-11	1.62669e-11	1.72236e-11	1.86606e-11	3.74297e-11	1.41311e-11	1.8165e-11	1.48916e-11	4.3061e-11	1.48196e-11	1.6903e-11	1.67048e-11	1.13107e-11	1.98547e-11	1.51017e-11	1.8839e-11	2.90947e-11
12.24	1.33796e-11	1.75426e-11	2.40248e-11	1.62718e-11	1.72294e-11	1.86569e-11	3.74265e-11	1.41308e-11	1.81641e-11	1.48941e-11	4.30707e-11	1.48169e-11	1.69007e-11	1.67046e-11	1.13135e-11	1.98503e-11	1.51031e-11	1.88336e-11	2.90775e-11
12.26	1.33767e-11	1.75333e-11	2.40254e-11	1.62726e-11	1.72195e-11	1.86616e-11	3.74304e-11	1.41358e-11	1.81721e-11	1.48897e-11	4.30731e-11	1.48192e-11	1.69013e-11	1.67045e-11	1.13146e-11	1.98543e-11	1.50981e-11	1.88415e-11	2.90792e-11
12.28	1.33821e-11	1.75308e-11	2.40286e-11	1.62703e-11	1.72183e-11	1.86608e-11	3.7426e-11	1.41352e-11	1.81686e-11	1.48896e-11	4.30723e-11	1.48104e-11	1.69081e-11	1.67048e-11	1.13111e-11	1.9856e-11	1.50984e-11	1.884e-11	2.90873e-11
12.3	1.3375e-11	1.75362e-11	2.40252e-11	1.62701e-11	1.722e-11	1.86612e-11	3.74253e-11	1.41414e-11	1.81715e-11	1.48881e-11	4.30793e-11	1.48176e-11	1.69064e-11	1.6702e-11	1.13117e-11	1.98533e-11	1.51004e-11	1.88349e-11	2.90866e-11
12.32	1.33753e-11	1.75344e-11	2.40245e-11	1.62721e-11	1.72187e-11	1.86536e-11	3.74303e-11	1.41375e-11	1.81665e-11	1.48956e-11	4.30644e-11	1.48153e-11	1.69083e-11	1.6703e-11	1.1309e-11	1.98545e-11	1.50976e-11	1.88431e-11	2.91012e-11
12.34	1.33797e-11	1.75332e-11	2.40317e-11	1.62709e-11	1.72185e-11	1.8657e-11	3.74304e-11	1.41343e-11	1.81699e-11	1.48924e-11	4.3082e-11	1.48183e-11	1.69056e-11	1.6703e-11	1.13131e-11	1.98561e-11	1.50955e-11	1.88448e-11	2.90985e-11
12.36	1.33826e-11	1.75282e-11	2.40353e-11	1.62726e-11	1.72226e-11	1.86552e-11	3.74295e-11	1.4133e-11	1.81683e-11	1.48949e-11	4.30728e-11	1.48131e-11	1.68998e-11	1.67081e-11	1.13127e-11	1.98498e-11	1.50978e-11	1.88389e-11	2.9098e-11
12.38	1.33747e-11	1.7535e-11	2.40384e-11	1.62721e-11	1.72194e-11	1.86556e-11	3.74296e-11	1.41284e-11	1.81683e-11	1.48901e-11	4.30828e-11	1.48177e-11	1.6905e-11	1.67044e-11	1.13137e-11	1.98542e-11	1.51026e-11	1.88422e-11	2.90909e-11
12.4	1.3375e-11	1.75279e-11	2.40433e-11	1.62744e-11	1.72194e-11	1.86549e-11	3.74358e-11	1.41374e-11	1.81684e-11	1.4892e-11	4.30787e-11	1.48183e-11	1.69023e-11	1.66996e-11	1.13139e-11	1.98516e-11	1.50996e-11	1.88339e-11	2.91033e-11
12.42	1.33778e-11	1.75237e-11	2.40425e-11	1.62706e-11	1.72192e-11	1.86527e-11	3.74273e-11	1.41321e-11	1.81692e-11	1.48917e-11	4.30643e-11	1.48164e-11	1.68976e-11	1.67046e-11	1.1305e-11	1.98546e-11	1.50984e-11	1.88435e-11	2.90902e-11
12.44	1.33776e-11	1.75319e-11	2.40325e-11	1.62704e-11	1.72165e-11	1.86519e-11	3.74362e-11	1.41332e-11	1.8169e-11	1.48938e-11	4.30726e-11	1.48139e-11	1.69058e-11	1.67085e-11	1.13122e-11	1.9853e-11	1.50956e-11	1.88382e-11	2.90844e-11
12.46	1.33749e-11	1.75237e-11	2.40393e-11	1.62724e-11	1.72179e-11	1.86531e-11	3.74277e-11	1.41258e-11	1.81672e-11	1.48928e-11	4.30798e-11	1.48166e-11	1.69e-11	1.67012e-11	1.13125e-11	1.98543e-11	1.50953e-11	1.88343e-11	2.90759e-11
12.48	1.33746e-11	1.75269e-11	2.40366e-11	1.62654e-11	1.7219e-11	1.86533e-11	3.7436e-11	1.41282e-11	1.8172e-11	1.48824e-11	4.30735e-11	1.48171e-11	1.69056e-11	1.66989e-11	1.13059e-11	1.98507e-11	1.50956e-11	1.88376e-11	2.90815e-11
12.5	1.33828e-11	1.75192e-11	2.40342e-11	1.627e-11	1.7217e-11	1.86528e-11	3.74353e-11	1.41358e-11	1.81736e-11	1.48805e-11	4.30709e-11	1.48245e-11	1.69065e-11	1.67026e-11	1.13066e-11	1.98505e-11	1.50948e-11	1.88446e-11	2.90757e-11
12.52	1.33787e-11	1.75262e-11	2.40259e-11	1.62713e-11	1.72153e-11	1.86489e-11	3.7426e-11	1.41258e-11	1.81655e-11	1.48851e-11	4.3081e-11	1.48226e-11	1.69049e-11	1.66967e-11	1.13123e-11	1.98546e-11	1.50944e-11	1.88391e-11	2.9051e-11
12.54	1.33745e-11	1.75224e-11	2.40243e-11	1.62693e-11	1.72253e-11	1.86455e-11	3.74294e-11	1.41378e-11	1.81726e-11	1.48937e-11	4.30955e-11	1.48194e-11	1.69091e-11	1.66992e-11	1.13105e-11	1.98635e-11	1.50956e-11	1.88435e-11	2.90617e-11
12.56	1.33765e-11	1.75182e-11	2.40398e-11	1.62687e-11	1.72227e-11	1.86485e-11	3.74268e-11	1.41367e-11	1.81679e-11	1.48926e-11	4.30755e-11	1.48186e-11	1.69119e-11	1.66972e-11	1.13066e-11	1.98564e-11	1.50916e-11	1.88418e-11	2.90606e-11
12.58	1.33778e-11	1.75293e-11	2.40287e-11	1.62676e-11	1.72149e-11	1.86425e-11	3.74321e-11	1.4139e-11	1.81642e-11	1.48918e-11	4.30706e-11	1.48147e-11	1.69096e-11	1.67095e-11	1.13099e-11	1.98572e-11	1.5098e-11	1.88326e-11	2.90652e-11
12.6	1.33722e-11	1.75223e-11	2.40337e-11	1.62723e-11	1.72139e-11	1.86456e-11	3.74308e-11	1.41415e-11	1.81642e-11	1.48861e-11	4.30781e-11	1.48158e-11	1.69066e-11	1.67079e-11	1.13091e-11	1.98416e-11	1.50954e-11	1.88387e-11	2.90746e-11
12.62	1.33712e-11	1.75201e-11	2.40285e-11	1.627e-11	1.72178e-11	1.86438e-11	3.74349e-11	1.41342e-11	1.81707e-11	1.48659e-11	4.30759e-11	1.48112e-11	1.69085e-11	1.67004e-11	1.13145e-11	1.98368e-11	1.50963e-11	1.88421e-11	2.90894e-11
12.64	1.33738e-11	1.75213e-11	2.40319e-11	1.62749e-11	1.7215e-11	1.86441e-11	3.74345e-11	1.41354e-11	1.81673e-11	1.48241e-11	4.30629e-11	1.48145e-11	1.69117e-11	1.67029e-11	1.13161e-11	1.98368e-11	1.50919e-11	1.88385e-11	2.91596e-11
12.66	1.33728e-11	1.75253e-11	2.4024e-11	1.62739e-11	1.72169e-11	1.86435e-11	3.74302e-11	1.41342e-11	1.81712e-11	1.47878e-11	4.307e-11	1.48191e-11	1.69081e-11	1.66982e-11	1.13109e-11	1.98448e-11	1.50985e-11	1.88403e-11	2.91901e-11
12.68	1.33821e-11	1.75238e-11	2.40195e-11	1.62755e-11	1.72143e-11	1.8643e-11	3.74348e-11	1.41285e-11	1.8168e-11	1.47741e-11	4.3059e-11	1.48163e-11	1.69049e-11	1.67028e-11	1.13123e-11	1.9843e-11	1.51012e-11	1.88424e-11	2.91204e-11
12.7	1.33717e-11	1.75205e-11	2.40314e-11	1.62681e-11	1.72232e-11	1.86397e-11	3.7435e-11	1.41286e-11	1.81675e-11	1.47656e-11	4.3079e-11	1.48148e-11	1.69075e-11	1.67001e-11	1.13153e-11	1.98275e-11	1.51012e-11	1.8841e-11	2.91121e-11
12.72	1.3376e-11	1.75136e-11	2.40384e-11	1.62701e-11	1.72175e-11	1.8639e-11	3.74348e-11	1.41299e-11	1.81678e-11	1.47617e-11	4.30725e-11	1.4817e-11	1.69122e-11	1.67012e-11	1.13168e-11	1.97725e-11	1.51002e-11	1.88407e-11	2.90906e-11
12.74	1.33783e-11	1.75193e-11	2.40461e-11	1.6276e-11	1.72221e-11	1.86358e-11	3.74403e-11	1.41308e-11	1.81695e-11	1.47535e-11	4.30827e-11	1.48176e-11	1.69086e-11	1.66965e-11	1.13172e-11	1.97221e-11	1.51045e-11	1.88412e-11	2.9104e-11
12.76	1.33773e-11	1.75247e-11	2.40257e-11	1.62727e-11	1.72278e-11	1.86384e-11	3.74317e-11	1.41374e-11	1.81746e-11	1.47562e-11	4.30719e-11	1.48149e-11	1.69037e-11	1.66971e-11	1.13143e-11	1.97055e-11	1.51067e-11	1.88394e-11	2.90986e-11
12.78	1.33843e-11	1.75197e-11	2.40353e-11	1.62718e-11	1.7222e-11	1.86359e-11	3.74347e-11	1.41374e-11	1.81708e-11	1.47625e-11	4.30675e-11	1.48143e-11	1.69035e-11	1.67026e-11	1.13174e-11	1.96873e-11	1.51061e-11	1.88385e-11	2.91017e-11
12.8	1.3373e-11	1.75218e-11	2.40246e-11	1.62755e-11	1.72243e-11	1.86339e-11	3.74368e-11	1.41321e-11	1.81735e-11	1.47611e-11	4.30781e-11	1.48101e-11	1.6905e-11	1.66995e-11	1.13125e-11	1.96863e-11	1.50993e-11	1.88349e-11	2.90831e-11
12.82	1.3375e-11	1.75235e-11	2.40446e-11	1.62661e-11	1.72159e-11	1.86397e-11	3.74351e-11	1.41331e-11	1.81703e-11	1.4758e-11	4.30755e-11	1.48129e-11	1.69024e-11	1.67038e-11	1.13142e-11	1.96826e-11	1.51032e-11	1.88352e-11	2.90838e-11
12.84	1.33782e-11	1.7525e-11	2.40279e-11	1.62712e-11	1.72218e-11	1.86362e-11	3.74325e-11	1.41365e-11	1.81683e-11	1.47606e-11	4.3078e-11	1.48115e-11	1.69026e-11	1.67042e-11	1.13114e-11	1.96878e-11	1.51018e-11	1.88359e-11	2.90909e-11
12.86	1.33757e-11	1.75259e-11	2.40447e-11	1.62715e-11	1.72251e-11	1.86364e-11	3.74379e-11	1.41393e-11	1.81697e-11	1.47652e-11	4.3094e-11	1.4811e-11	1.69095e-11	1.67083e-11	1.13158e-11	1.96871e-11	1.51036e-11	1.88383e-11	2.90881e-11
12.88	1.33727e-11	1.75219e-11	2.40414e-11	1.62781e-11	1.72214e-11	1.86354e-11	3.74381e-11	1.41331e-11	1.81695e-11	1.47664e-11	4.30872e-11	1.48175e-11	1.69157e-11	1.67062e-11	1.13124e-11	1.96887e-11	1.5101e-11	1.88373e-11	2.90885e-11
12.9	1.3374e-11	1.75261e-11	2.40392e-11	1.62713e-11	1.7219e-11	1.86379e-11	3.74368e-11	1.41346e-11	1.81724e-11	1.47637e-11	4.30925e-11	1.4813e-11	1.691e-11	1.67018e-11	1.13168e-11	1.96909e-11	1.50977e-11	1.88438e-11	2.90826e-11
12.92	1.33796e-11	1.75265e-11	2.40522e-11	1.6271e-11	1.72166e-11	1.86329e-11	3.74346e-11	1.41347e-11	1.81706e-11	1.4765e-11	4.30919e-11	1.48098e-11	1.69052e-11	1.6706e-11	1.13158e-11	1.96926e-11	1.51011e-11	1.88362e-11	2.90891e-11
12.94	1.33731e-11	1.75191e-11	2.40413e-11	1.62661e-11	1.72162e-11	1.86336e-11	3.74287e-11	1.41319e-11	1.81718e-11	1.47754e-11	4.30834e-11	1.48125e-11	1.69094e-11	1.6701e-11	1.1314e-11	1.96905e-11	1.50976e-11	1.88403e-11	2.90889e-11
12.96	1.33769e-11	1.75215e-11	2.4034e-11	1.62716e-11	1.7215e-11	1.86338e-11	3.74347e-11	1.41294e-11	1.81693e-11	1.47649e-11	4.30971e-11	1.48129e-11	1.69042e-11	1.6703e-11	1.13142e-11	1.97006e-11	1.51032e-11	1.88416e-11	2.90861e-11
12.98	1.33754e-11	1.75287e-11	2.4472e-11	1.62722e-11	1.72263e-11	1.86361e-11	3.74346e-11	1.41327e-11	1.81736e-11	1.47713e-11	4.30741e-11	1.48123e-11	1.69052e-11	1.67015e-11	1.13136e-11	1.97007e-11	1.51049e-11	1.88346e-11	2.90851e-11
13	1.33722e-11	1.75211e-11	2.44186e-11	1.62739e-11	1.72238e-11	1.86348e-11	3.74388e-11	1.4136e-11	1.81684e-11	1.47702e-11	4.3081e-11	1.48097e-11	1.69083e-11	1.66965e-11	1.13128e-11	1.96883e-11	1.51015e-11	1.88385e-11	2.90804e-11
13.02	1.33724e-11	1.75231e-11	2.43754e-11	1.62729e-11	1.72204e-11	1.86343e-11	3.74325e-11	1.41296e-11	1.8168e-11	1.47726e-11	4.30827e-11	1.48135e-11	1.69107e-11	1.66973e-11	1.13141e-11	1.96923e-11	1.51036e-11	1.88366e-11	2.90822e-11
13.04	1.33679e-11	1.75221e-11	2.43389e-11	1.62662e-11	1.72237e-11	1.86284e-11	3.7435e-11	1.41302e-11	1.81705e-11	1.47698e-11	4.30822e-11	1.4811e-11	1.68997e-11	1.66985e-11	1.13149e-11	1.96943e-11	1.51053e-11	1.88321e-11	2.90894e-11
13.06	1.33751e-11	1.75234e-11	2.42943e-11	1.62693e-11	1.72194e-11	1.86174e-11	3.74403e-11	1.41326e-11	1.81672e-11	1.4769e-11	4.30753e-11	1.48164e-11	1.68984e-11	1.6702e-11	1.13128e-11	1.9691e-11	1.51086e-11	1.88297e-11	2.90941e-11
13.08	1.33766e-11	1.75185e-11	2.42597e-11	1.62721e-11	1.72199e-11	1.86119e-11	3.74355e-11	1.41293e-11	1.81679e-11	1.47725e-11	4.30636e-11	1.48099e-11	1.69073e-11	1.67011e-11	1.13151e-11	1.96926e-11	1.51059e-11	1.88393e-11	2.90859e-11
13.1	1.33779e-11	1.7516e-11	2.42383e-11	1.62752e-11	1.7215e-11	1.86187e-11	3.74349e-11	1.41351e-11	1.81701e-11	1.47696e-11	4.30768e-11	1.48116e-11	1.6908e-11	1.67013e-11	1.13146e-11	1.96902e-11	1.51114e-11	1.88368e-11	2.91057e-11
13.12	1.33742e-11	1.7522e-11	2.42114e-11	1.6275e-11	1.7222e-11	1.86171e-11	3.74337e-11	1.4132e-11	1.81723e-11	1.47641e-11	4.30867e-11	1.48124e-11	1.69042e-11	1.66999e-11	1.13149e-11	1.96899e-11	1.51088e-11	1.88355e-11	2.90727e-11
13.14	1.33705e-11	1.75313e-11	2.42046e-11	1.62727e-11	1.72174e-11	1.86168e-11	3.74306e-11	1.4132e-11	1.8169e-11	1.47631e-11	4.30839e-11	1.48154e-11	1.69033e-11	1.67011e-11	1.13148e-11	1.96818e-11	1.51056e-11	1.8833e-11	2.90859e-11
13.16	1.33663e-11	1.75206e-11	2.41819e-11	1.62736e-11	1.72208e-11	1.86225e-11	3.74355e-11	1.41261e-11	1.81729e-11	1.47752e-11	4.30764e-11	1.48093e-11	1.69072e-11	1.67066e-11	1.13206e-11	1.96861e-11	1.51083e-11	1.88337e-11	2.90812e-11
13.18	1.33639e-11	1.7523e-11	2.41717e-11	1.62786e-11	1.72195e-11	1.86256e-11	3.74345e-11	1.4133e-11	1.81705e-11	1.47727e-11	4.30748e-11	1.48112e-11	1.69078e-11	1.66978e-11	1.13128e-11	1.96763e-11	1.51076e-11	1.88367e-11	2.9099e-11
13.2	1.33651e-11	1.75171e-11	2.41438e-11	1.62738e-11	1.72168e-11	1.86293e-11	3.74342e-11	1.41276e-11	1.81696e-11	1.47702e-11	4.30867e-11	1.48099e-11	1.69059e-11	1.67067e-11	1.13158e-11	1.96787e-11	1.51066e-11	1.88384e-11	2.90884e-11
13.22	1.33611e-11	1.75222e-11	2.4152e-11	1.62783e-11	1.72161e-11	1.86249e-11	3.74351e-11	1.41321e-11	1.81714e-11	1.47684e-11	4.30677e-11	1.4809e-11	1.69141e-11	1.66941e-11	1.13161e-11	1.96809e-11	1.51118e-11	1.8834e-11	2.90789e-11
13.24	1.3362e-11	1.75216e-11	2.41488e-11	1.62738e-11	1.72136e-11	1.86195e-11	3.74316e-11	1.41289e-11	1.81602e-11	1.47658e-11	4.30882e-11	1.48079e-11	1.69053e-11	1.66995e-11	1.13131e-11	1.96803e-11	1.51122e-11	1.88367e-11	2.90994e-11
13.26	1.33559e-11	1.75239e-11	2.4138e-11	1.62703e-11	1.72229e-11	1.8618e-11	3.74241e-11	1.41251e-11	1.80724e-11	1.47664e-11	4.30811e-11	1.48076e-11	1.69128e-11	1.66986e-11	1.13082e-11	1.96835e-11	1.51081e-11	1.88389e-11	2.90807e-11
13.28	1.33579e-11	1.75215e-11	2.41328e-11	1.62701e-11	1.72214e-11	1.86163e-11	3.74392e-11	1.41255e-11	1.7947e-11	1.47722e-11	4.30862e-11	1.48124e-11	1.69068e-11	1.66979e-11	1.13146e-11	1.96768e-11	1.51085e-11	1.88377e-11	2.90848e-11
13.3	1.33614e-11	1.75156e-11	2.41298e-11	1.62693e-11	1.72163e-11	1.8617e-11	3.744e-11	1.4125e-11	1.7885e-11	1.47672e-11	4.30963e-11	1.48095e-11	1.69132e-11	1.67001e-11	1.13181e-11	1.96721e-11	1.51148e-11	1.88354e-11	2.90871e-11
13.32	1.33588e-11	1.75219e-11	2.41264e-11	1.62738e-11	1.72188e-11	1.86105e-11	3.74357e-11	1.41249e-11	1.78558e-11	1.47651e-11	4.30948e-11	1.48096e-11	1.69095e-11	1.67032e-11	1.13145e-11	1.96725e-11	1.51093e-11	1.88299e-11	2.90817e-11
13.34	1.33576e-11	1.75148e-11	2.41207e-11	1.62724e-11	1.72219e-11	1.8616e-11	3.74306e-11	1.41215e-11	1.78441e-11	1.47656e-11	4.30681e-11	1.48089e-11	1.69077e-11	1.67001e-11	1.13171e-11	1.96738e-11	1.51022e-11	1.88406e-11	2.90829e-11
13.36	1.33588e-11	1.75164e-11	2.41113e-11	1.62718e-11	1.72175e-11	1.86252e-11	3.74396e-11	1.41287e-11	1.78381e-11	1.47663e-11	4.3086e-11	1.48085e-11	1.6904e-11	1.67011e-11	1.13122e-11	1.96726e-11	1.51077e-11	1.88358e-11	2.90825e-11
13.38	1.33578e-11	1.75123e-11	2.41034e-11	1.62729e-11	1.72202e-11	1.86219e-11	3.74427e-11	1.41224e-11	1.78354e-11	1.47707e-11	4.30824e-11	1.48139e-11	1.69065e-11	1.66976e-11	1.13124e-11	1.9678e-11	1.51059e-11	1.88302e-11	2.90827e-11
13.4	1.33581e-11	1.75171e-11	2.41016e-11	1.62713e-11	1.72189e-11	1.8628e-11	3.74355e-11	1.41237e-11	1.78346e-11	1.47689e-11	4.30889e-11	1.48065e-11	1.6904e-11	1.6698e-11	1.13137e-11	1.96673e-11	1.51085e-11	1.88362e-11	2.91007e-11
13.42	1.33596e-11	1.7517e-11	2.40942e-11	1.62715e-11	1.72133e-11	1.8621e-11	3.74331e-11	1.41354e-11	1.78326e-11	1.4762e-11	4.31055e-11	1.48108e-11	1.69025e-11	1.6695e-11	1.13172e-11	1.96679e-11	1.51091e-11	1.88397e-11	2.90919e-11
13.44	1.33548e-11	1.7519e-11	2.40965e-11	1.62701e-11	1.72218e-11	1.86219e-11	3.74285e-11	1.41268e-11	1.7834e-11	1.4768e-11	4.30874e-11	1.48087e-11	1.69004e-11	1.67008e-11	1.13055e-11	1.96633e-11	1.51026e-11	1.88308e-11	2.90922e-11
13.46	1.33545e-11	1.75255e-11	2.41071e-11	1.62736e-11	1.72152e-11	1.86219e-11	3.74286e-11	1.41303e-11	1.78339e-11	1.47659e-11	4.30765e-11	1.4811e-11	1.69027e-11	1.66985e-11	1.13146e-11	1.96665e-11	1.51108e-11	1.88375e-11	2.90988e-11
13.48	1.33633e-11	1.75217e-11	2.41011e-11	1.62712e-11	1.72193e-11	1.86243e-11	3.74407e-11	1.41268e-11	1.78372e-11	1.47669e-11	4.30906e-11	1.48091e-11	1.69042e-11	1.67045e-11	1.13133e-11	1.96627e-11	1.51097e-11	1.88406e-11	2.91075e-11
13.5	1.33577e-11	1.75141e-11	2.41008e-11	1.62721e-11	1.72163e-11	1.86238e-11	3.74358e-11	1.41276e-11	1.783e-11	1.47703e-11	4.30725e-11	1.48162e-11	1.69075e-11	1.67035e-11	1.13159e-11	1.96618e-11	1.51128e-11	1.88356e-11	2.91284e-11
13.52	1.3355e-11	1.75193e-11	2.40866e-11	1.62712e-11	1.72196e-11	1.86163e-11	3.74286e-11	1.41274e-11	1.7832e-11	1.47648e-11	4.30805e-11	1.48089e-11	1.6905e-11	1.66954e-11	1.1317e-11	1.96653e-11	1.51106e-11	1.88378e-11	2.91262e-11
13.54	1.3357e-11	1.75189e-11	2.40916e-11	1.62685e-11	1.72134e-11	1.86166e-11	3.74317e-11	1.41346e-11	1.78403e-11	1.47605e-11	4.30895e-11	1.48067e-11	1.68977e-11	1.66978e-11	1.13191e-11	1.9661e-11	1.51156e-11	1.88351e-11	2.91359e-11
13.56	1.33575e-11	1.75191e-11	2.40833e-11	1.627e-11	1.72183e-11	1.86249e-11	3.74482e-11	1.41318e-11	1.78354e-11	1.4765e-11	4.3099e-11	1.48102e-11	1.69057e-11	1.67018e-11	1.13153e-11	1.96633e-11	1.51113e-11	1.88364e-11	2.91406e-11
13.58	1.33598e-11	1.75174e-11	2.40996e-11	1.62739e-11	1.72129e-11	1.86181e-11	3.74297e-11	1.4134e-11	1.78368e-11	1.47627e-11	4.30946e-11	1.48096e-11	1.69045e-11	1.66994e-11	1.13153e-11	1.96589e-11	1.51063e-11	1.88345e-11	2.91263e-11
13.6	1.336e-11	1.75229e-11	2.40933e-11	1.62726e-11	1.72181e-11	1.86207e-11	3.74312e-11	1.41301e-11	1.78338e-11	1.4765e-11	4.30885e-11	1.48088e-11	1.69104e-11	1.66996e-11	1.13149e-11	1.96575e-11	1.51075e-11	1.88309e-11	2.91157e-11
13.62	1.33532e-11	1.75189e-11	2.40784e-11	1.62746e-11	1.72135e-11	1.86226e-11	3.74363e-11	1.41251e-11	1.7833e-11	1.47678e-11	4.3089e-11	1.48098e-11	1.69089e-11	1.66961e-11	1.13154e-11	1.96559e-11	1.51176e-11	1.88343e-11	2.9123e-11
13.64	1.33454e-11	1.75118e-11	2.40781e-11	1.6273e-11	1.72193e-11	1.86186e-11	3.74355e-11	1.41221e-11	1.78333e-11	1.47681e-11	4.31025e-11	1.48061e-11	1.69024e-11	1.66994e-11	1.13151e-11	1.96571e-11	1.51165e-11	1.88331e-11	2.9118e-11
13.66	1.33575e-11	1.75255e-11	2.40756e-11	1.62728e-11	1.72209e-11	1.86161e-11	3.74304e-11	1.41245e-11	1.78341e-11	1.47641e-11	4.30972e-11	1.48087e-11	1.69061e-11	1.66985e-11	1.13146e-11	1.96582e-11	1.5111e-11	1.88391e-11	2.91228e-11
13.68	1.33548e-11	1.75235e-11	2.40774e-11	1.6272e-11	1.72151e-11	1.86156e-11	3.73976e-11	1.41324e-11	1.78317e-11	1.47657e-11	4.31005e-11	1.48087e-11	1.69045e-11	1.66986e-11	1.13144e-11	1.96558e-11	1.51158e-11	1.88376e-11	2.91545e-11
13.7	1.33542e-11	1.75184e-11	2.4073e-11	1.6273e-11	1.72046e-11	1.8621e-11	3.72445e-11	1.41239e-11	1.78294e-11	1.47665e-11	4.31123e-11	1.48075e-11	1.69048e-11	1.66993e-11	1.13171e-11	1.96611e-11	1.51104e-11	1.88326e-11	2.91351e-11
13.72	1.33496e-11	1.75214e-11	2.40659e-11	1.62704e-11	1.72185e-11	1.86203e-11	3.70842e-11	1.41301e-11	1.78329e-11	1.47604e-11	4.30901e-11	1.48121e-11	1.69058e-11	1.67001e-11	1.13184e-11	1.96527e-11	1.51159e-11	1.88354e-11	2.91333e-11
13.74	1.3352e-11	1.75174e-11	2.40613e-11	1.62735e-11	1.72147e-11	1.86188e-11	3.69843e-11	1.41324e-11	1.78279e-11	1.47621e-11	4.30996e-11	1.48024e-11	1.69069e-11	1.66976e-11	1.13138e-11	1.96561e-11	1.51115e-11	1.88329e-11	2.91324e-11
13.76	1.33527e-11	1.75181e-11	2.40732e-11	1.62774e-11	1.72075e-11	1.86167e-11	3.69358e-11	1.4127e-11	1.78269e-11	1.47656e-11	4.30919e-11	1.4807e-11	1.69036e-11	1.66981e-11	1.1316e-11	1.96502e-11	1.51134e-11	1.88373e-11	2.91185e-11
13.78	1.33468e-11	1.75193e-11	2.40333e-11	1.62717e-11	1.7215e-11	1.86155e-11	3.69133e-11	1.41265e-11	1.78228e-11	1.47642e-11	4.30871e-11	1.48052e-11	1.69139e-11	1.6701e-11	1.1309e-11	1.96504e-11	1.51106e-11	1.884e-11	2.91082e-11
13.8	1.33494e-11	1.75223e-11	2.40173e-11	1.62728e-11	1.72152e-11	1.86164e-11	3.69008e-11	1.41219e-11	1.78268e-11	1.47621e-11	4.30936e-11	1.48044e-11	1.69069e-11	1.66973e-11	1.13169e-11	1.96491e-11	1.51137e-11	1.88395e-11	2.91234e-11
13.82	1.33477e-11	1.75196e-11	2.40181e-11	1.6268e-11	1.72159e-11	1.8619e-11	3.68879e-11	1.41189e-11	1.78262e-11	1.47631e-11	4.31154e-11	1.48028e-11	1.69105e-11	1.66975e-11	1.13075e-11	1.96488e-11	1.51044e-11	1.88343e-11	2.91197e-11
13.84	1.33468e-11	1.75215e-11	2.40114e-11	1.62741e-11	1.72132e-11	1.8616e-11	3.68891e-11	1.41177e-11	1.78266e-11	1.47636e-11	4.30868e-11	1.48026e-11	1.69059e-11	1.66979e-11	1.13127e-11	1.96477e-11	1.51098e-11	1.88358e-11	2.91232e-11
13.86	1.33519e-11	1.75192e-11	2.39993e-11	1.62713e-11	1.7212e-11	1.86169e-11	3.68896e-11	1.41159e-11	1.78245e-11	1.47662e-11	4.30921e-11	1.48038e-11	1.69061e-11	1.66975e-11	1.13124e-11	1.96528e-11	1.5109e-11	1.88415e-11	2.91106e-11
13.88	1.33506e-11	1.75169e-11	2.3978e-11	1.62715e-11	1.72105e-11	1.86177e-11	3.68839e-11	1.41212e-11	1.78246e-11	1.47641e-11	4.31066e-11	1.48001e-11	1.69124e-11	1.66957e-11	1.13136e-11	1.96515e-11	1.51136e-11	1.88344e-11	2.91173e-11
13.9	1.33529e-11	1.75216e-11	2.3863e-11	1.6272e-11	1.72109e-11	1.86147e-11	3.68968e-11	1.41118e-11	1.78242e-11	1.47622e-11	4.30934e-11	1.48012e-11	1.69059e-11	1.66965e-11	1.13085e-11	1.96519e-11	1.51107e-11	1.88453e-11	2.91287e-11
13.92	1.33578e-11	1.75197e-11	2.37809e-11	1.6273e-11	1.72141e-11	1.86156e-11	3.68909e-11	1.41146e-11	1.78263e-11	1.4761e-11	4.31041e-11	1.48004e-11	1.69113e-11	1.66969e-11	1.13106e-11	1.96485e-11	1.51156e-11	1.88429e-11	2.9116e-11
13.94	1.33543e-11	1.75192e-11	2.3744e-11	1.62683e-11	1.72087e-11	1.86125e-11	3.68924e-11	1.41133e-11	1.78238e-11	1.4768e-11	4.31176e-11	1.48021e-11	1.69045e-11	1.67015e-11	1.13112e-11	1.96498e-11	1.51125e-11	1.88426e-11	2.91126e-11
13.96	1.33545e-11	1.75193e-11	2.37296e-11	1.62716e-11	1.72128e-11	1.86151e-11	3.68933e-11	1.41147e-11	1.78249e-11	1.47669e-11	4.3109e-11	1.47987e-11	1.69044e-11	1.66955e-11	1.1303e-11	1.96514e-11	1.5113e-11	1.88441e-11	2.91073e-11
13.98	1.33544e-11	1.75105e-11	2.37222e-11	1.62757e-11	1.72117e-11	1.86116e-11	3.68923e-11	1.41178e-11	1.78261e-11	1.47686e-11	4.31013e-11	1.48007e-11	1.69108e-11	1.66982e-11	1.13083e-11	1.96443e-11	1.51177e-11	1.88354e-11	2.91108e-11
14	1.33537e-11	1.75201e-11	2.3704e-11	1.62771e-11	1.72146e-11	1.86132e-11	3.68959e-11	1.41153e-11	1.78268e-11	1.47632e-11	4.30984e-11	1.48006e-11	1.69136e-11	1.66965e-11	1.13082e-11	1.96505e-11	1.51105e-11	1.88326e-11	2.91176e-11
14.02	1.33543e-11	1.75215e-11	2.36963e-11	1.62774e-11	1.721e-11	1.86173e-11	3.68924e-11	1.41153e-11	1.78228e-11	1.47615e-11	4.31029e-11	1.48005e-11	1.69068e-11	1.66974e-11	1.13103e-11	1.96438e-11	1.51181e-11	1.88363e-11	2.91397e-11
14.04	1.33468e-11	1.75161e-11	2.37004e-11	1.62724e-11	1.7215e-11	1.86184e-11	3.6892e-11	1.41125e-11	1.78203e-11	1.47667e-11	4.31086e-11	1.47989e-11	1.6909e-11	1.66954e-11	1.13146e-11	1.96432e-11	1.51148e-11	1.88413e-11	2.91443e-11
14.06	1.33535e-11	1.752e-11	2.37023e-11	1.62741e-11	1.72131e-11	1.86128e-11	3.68921e-11	1.41163e-11	1.78238e-11	1.47635e-11	4.30927e-11	1.48014e-11	1.691e-11	1.66939e-11	1.13152e-11	1.96437e-11	1.51134e-11	1.88339e-11	2.91649e-11
14.08	1.33488e-11	1.75138e-11	2.36973e-11	1.62793e-11	1.72159e-11	1.86156e-11	3.68852e-11	1.41178e-11	1.78214e-11	1.47608e-11	4.31041e-11	1.48003e-11	1.69134e-11	1.66999e-11	1.13096e-11	1.96474e-11	1.51139e-11	1.88333e-11	2.91759e-11
14.1	1.33507e-11	1.75126e-11	2.36822e-11	1.62755e-11	1.72068e-11	1.86116e-11	3.68909e-11	1.41143e-11	1.78265e-11	1.47578e-11	4.30979e-11	1.47932e-11	1.69044e-11	1.66929e-11	1.13106e-11	1.9648e-11	1.51115e-11	1.88356e-11	2.91716e-11
14.12	1.33463e-11	1.75179e-11	2.36805e-11	1.62735e-11	1.72038e-11	1.86134e-11	3.68841e-11	1.41208e-11	1.78235e-11	1.47628e-11	4.31122e-11	1.4794e-11	1.69045e-11	1.66978e-11	1.13103e-11	1.96392e-11	1.51149e-11	1.88404e-11	2.91886e-11
14.14	1.3341e-11	1.75222e-11	2.36852e-11	1.62774e-11	1.72128e-11	1.86157e-11	3.68771e-11	1.41257e-11	1.78181e-11	1.47626e-11	4.31113e-11	1.47937e-11	1.69078e-11	1.67016e-11	1.13126e-11	1.96424e-11	1.51189e-11	1.88278e-11	2.91638e-11
14.16	1.33472e-11	1.75205e-11	2.36953e-11	1.62708e-11	1.72084e-11	1.86131e-11	3.68889e-11	1.41244e-11	1.78235e-11	1.47648e-11	4.31082e-11	1.47959e-11	1.69055e-11	1.66982e-11	1.13137e-11	1.96462e-11	1.51137e-11	1.88375e-11	2.9178e-11
14.18	1.33436e-11	1.75116e-11	2.36918e-11	1.62744e-11	1.72089e-11	1.86112e-11	3.68885e-11	1.41083e-11	1.78266e-11	1.47633e-11	4.31135e-11	1.47926e-11	1.69033e-11	1.66959e-11	1.13067e-11	1.96505e-11	1.51114e-11	1.88302e-11	2.91753e-11
14.2	1.33422e-11	1.75217e-11	2.36869e-11	1.62696e-11	1.72155e-11	1.86105e-11	3.68722e-11	1.41212e-11	1.78219e-11	1.4763e-11	4.30985e-11	1.4798e-11	1.69066e-11	1.66985e-11	1.13113e-11	1.96464e-11	1.51134e-11	1.88303e-11	2.91543e-11
14.22	1.33482e-11	1.752e-11	2.36855e-11	1.6272e-11	1.72134e-11	1.86128e-11	3.68824e-11	1.4121e-11	1.7822e-11	1.47613e-11	4.31176e-11	1.47925e-11	1.69038e-11	1.66972e-11	1.13126e-11	1.96434e-11	1.51115e-11	1.88381e-11	2.91556e-11
14.24	1.33444e-11	1.75214e-11	2.36758e-11	1.62743e-11	1.72146e-11	1.86137e-11	3.68741e-11	1.41196e-11	1.7824e-11	1.47623e-11	4.31131e-11	1.47913e-11	1.69105e-11	1.66972e-11	1.13117e-11	1.96409e-11	1.51134e-11	1.88358e-11	2.91456e-11
14.26	1.33477e-11	1.75163e-11	2.36819e-11	1.62731e-11	1.72077e-11	1.86099e-11	3.68728e-11	1.41208e-11	1.78223e-11	1.47643e-11	4.31032e-11	1.47931e-11	1.69052e-11	1.66895e-11	1.13142e-11	1.9649e-11	1.51153e-11	1.88324e-11	2.91386e-11
14.28	1.33515e-11	1.75222e-11	2.36756e-11	1.62814e-11	1.72109e-11	1.86112e-11	3.68707e-11	1.40989e-11	1.78228e-11	1.47662e-11	4.30857e-11	1.47906e-11	1.69043e-11	1.66971e-11	1.13076e-11	1.96395e-11	1.51191e-11	1.88345e-11	2.9155e-11
14.3	1.33477e-11	1.75185e-11	2.36728e-11	1.62733e-11	1.72116e-11	1.8616e-11	3.68715e-11	1.40536e-11	1.78245e-11	1.47595e-11	4.30909e-11	1.47881e-11	1.69078e-11	1.66928e-11	1.13075e-11	1.96392e-11	1.51161e-11	1.88343e-11	2.91428e-11
14.32	1.33461e-11	1.75115e-11	2.36651e-11	1.6277e-11	1.72083e-11	1.86099e-11	3.68622e-11	1.40222e-11	1.78208e-11	1.47629e-11	4.30949e-11	1.47852e-11	1.69076e-11	1.66982e-11	1.13064e-11	1.96438e-11	1.51164e-11	1.88422e-11	2.91594e-11
14.34	1.33464e-11	1.75168e-11	2.36618e-11	1.6271e-11	1.72105e-11	1.86137e-11	3.68739e-11	1.40114e-11	1.78227e-11	1.47618e-11	4.31025e-11	1.47837e-11	1.69093e-11	1.66969e-11	1.13102e-11	1.96418e-11	1.51174e-11	1.88375e-11	2.91563e-11
14.36	1.33486e-11	1.75215e-11	2.36559e-11	1.62754e-11	1.72083e-11	1.86116e-11	3.68628e-11	1.40003e-11	1.78254e-11	1.47626e-11	4.31098e-11	1.47876e-11	1.6909e-11	1.66923e-11	1.13094e-11	1.96422e-11	1.51126e-11	1.88435e-11	2.91628e-11
14.38	1.33454e-11	1.75176e-11	2.36488e-11	1.62753e-11	1.72053e-11	1.86094e-11	3.68656e-11	1.39981e-11	1.78212e-11	1.47568e-11	4.30938e-11	1.47874e-11	1.69097e-11	1.66991e-11	1.13094e-11	1.96452e-11	1.51153e-11	1.88384e-11	2.91586e-11
14.4	1.33539e-11	1.75187e-11	2.36514e-11	1.62692e-11	1.72067e-11	1.86158e-11	3.68706e-11	1.39966e-11	1.78243e-11	1.47652e-11	4.30937e-11	1.47794e-11	1.69092e-11	1.67018e-11	1.13136e-11	1.96405e-11	1.51144e-11	1.88325e-11	2.91342e-11
14.42	1.33435e-11	1.75198e-11	2.36541e-11	1.6271e-11	1.72112e-11	1.86127e-11	3.68658e-11	1.399e-11	1.78232e-11	1.47615e-11	4.31097e-11	1.47837e-11	1.69097e-11	1.66896e-11	1.13107e-11	1.96421e-11	1.51122e-11	1.88393e-11	2.91381e-11
14.44	1.33438e-11	1.7521e-11	2.36486e-11	1.62711e-11	1.72094e-11	1.86119e-11	3.68669e-11	1.39967e-11	1.78164e-11	1.47627e-11	4.31127e-11	1.47801e-11	1.69128e-11	1.66921e-11	1.13113e-11	1.96394e-11	1.51105e-11	1.88327e-11	2.91472e-11
14.46	1.33503e-11	1.75186e-11	2.36642e-11	1.6273e-11	1.72066e-11	1.86087e-11	3.68643e-11	1.39954e-11	1.78119e-11	1.47627e-11	4.30931e-11	1.47824e-11	1.69048e-11	1.66987e-11	1.13099e-11	1.96368e-11	1.51188e-11	1.88346e-11	2.91533e-11
14.48	1.33465e-11	1.75208e-11	2.364e-11	1.62772e-11	1.7205e-11	1.86065e-11	3.68646e-11	1.39944e-11	1.78181e-11	1.47602e-11	4.30921e-11	1.47821e-11	1.69104e-11	1.66978e-11	1.1311e-11	1.96407e-11	1.51163e-11	1.88358e-11	2.91659e-11
14.5	1.33506e-11	1.75254e-11	2.36529e-11	1.62748e-11	1.72039e-11	1.86085e-11	3.68646e-11	1.39996e-11	1.78178e-11	1.47601e-11	4.30943e-11	1.4775e-11	1.69151e-11	1.66979e-11	1.13103e-11	1.96408e-11	1.51173e-11	1.88357e-11	2.91777e-11
14.52	1.33451e-11	1.75153e-11	2.36335e-11	1.62772e-11	1.72067e-11	1.86071e-11	3.68716e-11	1.3997e-11	1.7818e-11	1.4763e-11	4.31211e-11	1.47813e-11	1.69093e-11	1.66916e-11	1.13129e-11	1.96377e-11	1.51175e-11	1.88362e-11	2.9178e-11
14.54	1.33541e-11	1.75216e-11	2.36657e-11	1.62743e-11	1.72091e-11	1.86093e-11	3.68667e-11	1.39938e-11	1.78203e-11	1.47628e-11	4.30944e-11	1.47759e-11	1.69102e-11	1.66998e-11	1.13138e-11	1.96429e-11	1.51179e-11	1.8839e-11	2.91631e-11
14.56	1.33497e-11	1.75179e-11	2.36548e-11	1.62742e-11	1.72073e-11	1.86062e-11	3.68679e-11	1.39918e-11	1.78184e-11	1.47579e-11	4.31004e-11	1.4779e-11	1.6908e-11	1.66958e-11	1.1312e-11	1.96326e-11	1.51211e-11	1.88328e-11	2.91724e-11
14.58	1.33494e-11	1.75184e-11	2.36434e-11	1.6272e-11	1.72161e-11	1.86088e-11	3.68599e-11	1.39954e-11	1.78167e-11	1.47583e-11	4.3095e-11	1.4779e-11	1.69102e-11	1.66947e-11	1.1312e-11	1.96364e-11	1.51135e-11	1.88348e-11	2.91795e-11
14.6	1.33479e-11	1.75131e-11	2.36374e-11	1.62782e-11	1.72161e-11	1.86069e-11	3.68662e-11	1.40024e-11	1.78132e-11	1.47569e-11	4.30892e-11	1.47779e-11	1.69112e-11	1.66887e-11	1.13114e-11	1.96403e-11	1.51186e-11	1.88295e-11	2.91816e-11
14.62	1.33483e-11	1.75139e-11	2.3631e-11	1.62706e-11	1.72015e-11	1.86132e-11	3.68617e-11	1.39955e-11	1.78161e-11	1.47597e-11	4.30969e-11	1.47811e-11	1.69134e-11	1.66864e-11	1.13085e-11	1.96372e-11	1.51174e-11	1.88343e-11	2.91638e-11
14.64	1.33478e-11	1.75218e-11	2.36321e-11	1.62757e-11	1.72103e-11	1.86101e-11	3.68634e-11	1.39894e-11	1.78177e-11	1.47634e-11	4.30807e-11	1.47826e-11	1.69109e-11	1.66938e-11	1.13164e-11	1.96381e-11	1.51185e-11	1.88387e-11	2.917e-11
14.66	1.3344e-11	1.75182e-11	2.36272e-11	1.62706e-11	1.72086e-11	1.86075e-11	3.68575e-11	1.39955e-11	1.7814e-11	1.47582e-11	4.30921e-11	1.4782e-11	1.69054e-11	1.67011e-11	1.13154e-11	1.96394e-11	1.51225e-11	1.88307e-11	2.91428e-11
14.68	1.33476e-11	1.75193e-11	2.36315e-11	1.62709e-11	1.72125e-11	1.86055e-11	3.68592e-11	1.39973e-11	1.78161e-11	1.47613e-11	4.31046e-11	1.47767e-11	1.69113e-11	1.66943e-11	1.13129e-11	1.96345e-11	1.51109e-11	1.88372e-11	2.91555e-11
14.7	1.33502e-11	1.7516e-11	2.36346e-11	1.62721e-11	1.72068e-11	1.86043e-11	3.68674e-11	1.4e-11	1.78157e-11	1.47635e-11	4.3102e-11	1.47817e-11	1.69093e-11	1.66933e-11	1.13121e-11	1.96409e-11	1.51145e-11	1.88337e-11	2.91373e-11
14.72	1.33507e-11	1.75145e-11	2.3626e-11	1.62708e-11	1.72067e-11	1.86023e-11	3.68613e-11	1.39979e-11	1.7816e-11	1.4763e-11	4.3096e-11	1.47772e-11	1.69038e-11	1.66951e-11	1.13215e-11	1.9636e-11	1.51159e-11	1.88433e-11	2.9124e-11
14.74	1.33528e-11	1.75147e-11	2.3628e-11	1.62714e-11	1.72105e-11	1.86043e-11	3.68655e-11	1.39901e-11	1.78146e-11	1.47657e-11	4.30855e-11	1.47854e-11	1.69079e-11	1.66914e-11	1.13167e-11	1.96419e-11	1.51085e-11	1.88407e-11	2.91197e-11
14.76	1.33516e-11	1.75102e-11	2.36266e-11	1.62753e-11	1.72133e-11	1.86052e-11	3.68643e-11	1.39921e-11	1.78158e-11	1.47594e-11	4.30996e-11	1.47803e-11	1.69124e-11	1.66913e-11	1.13191e-11	1.96374e-11	1.51211e-11	1.8838e-11	2.91405e-11
14.78	1.33475e-11	1.75113e-11	2.36286e-11	1.62749e-11	1.72114e-11	1.86071e-11	3.68613e-11	1.39917e-11	1.7818e-11	1.47588e-11	4.30906e-11	1.47742e-11	1.6912e-11	1.66972e-11	1.13193e-11	1.96395e-11	1.51221e-11	1.88351e-11	2.91443e-11
14.8	1.33472e-11	1.75261e-11	2.36212e-11	1.62717e-11	1.72003e-11	1.86076e-11	3.68732e-11	1.39887e-11	1.7817e-11	1.47526e-11	4.31091e-11	1.47766e-11	1.69151e-11	1.6693e-11	1.13124e-11	1.96377e-11	1.51205e-11	1.88399e-11	2.91466e-11
14.82	1.3349e-11	1.75273e-11	2.36221e-11	1.62732e-11	1.7201e-11	1.8608e-11	3.68649e-11	1.39924e-11	1.78198e-11	1.47605e-11	4.30842e-11	1.4779e-11	1.69085e-11	1.66941e-11	1.13072e-11	1.96407e-11	1.51187e-11	1.88325e-11	2.91711e-11
14.84	1.33478e-11	1.75259e-11	2.36261e-11	1.627e-11	1.72082e-11	1.86091e-11	3.68626e-11	1.39971e-11	1.78167e-11	1.47593e-11	4.30959e-11	1.47779e-11	1.69131e-11	1.66907e-11	1.13106e-11	1.96409e-11	1.51215e-11	1.88319e-11	2.91707e-11
14.86	1.33449e-11	1.75197e-11	2.36242e-11	1.62689e-11	1.72041e-11	1.86067e-11	3.68703e-11	1.3989e-11	1.78173e-11	1.47657e-11	4.30983e-11	1.47733e-11	1.6909e-11	1.66944e-11	1.13127e-11	1.96394e-11	1.51182e-11	1.88345e-11	2.91758e-11
14.88	1.33508e-11	1.75314e-11	2.36207e-11	1.62697e-11	1.72048e-11	1.86078e-11	3.68693e-11	1.39866e-11	1.78136e-11	1.47617e-11	4.30826e-11	1.47738e-11	1.69177e-11	1.66953e-11	1.13084e-11	1.96356e-11	1.5114e-11	1.8837e-11	2.91906e-11
14.9	1.33491e-11	1.75241e-11	2.3622e-11	1.62685e-11	1.72103e-11	1.86029e-11	3.68695e-11	1.39844e-11	1.78187e-11	1.47664e-11	4.30846e-11	1.47747e-11	1.69125e-11	1.66946e-11	1.13082e-11	1.96376e-11	1.51141e-11	1.88371e-11	2.91914e-11
14.92	1.33501e-11	1.75237e-11	2.36074e-11	1.62742e-11	1.72069e-11	1.86062e-11	3.68768e-11	1.39838e-11	1.78167e-11	1.47587e-11	4.30913e-11	1.47779e-11	1.69149e-11	1.66946e-11	1.1312e-11	1.9636e-11	1.51091e-11	1.88399e-11	2.91706e-11
14.94	1.33459e-11	1.75181e-11	2.36192e-11	1.62651e-11	1.72064e-11	1.86096e-11	3.68732e-11	1.39873e-11	1.78172e-11	1.4763e-11	4.3096e-11	1.47792e-11	1.69095e-11	1.66934e-11	1.1314e-11	1.96381e-11	1.51162e-11	1.88377e-11	2.91675e-11
14.96	1.33466e-11	1.75254e-11	2.36173e-11	1.62677e-11	1.72053e-11	1.86154e-11	3.68709e-11	1.39951e-11	1.78127e-11	1.47603e-11	4.31005e-11	1.47767e-11	1.69127e-11	1.66935e-11	1.13136e-11	1.9639e-11	1.51094e-11	1.88314e-11	2.91737e-11
14.98	1.33431e-11	1.75297e-11	2.3613e-11	1.62751e-11	1.72039e-11	1.86117e-11	3.68722e-11	1.39819e-11	1.78215e-11	1.47615e-11	4.3093e-11	1.47772e-11	1.69118e-11	1.66883e-11	1.131e-11	1.96387e-11	1.51119e-11	1.88412e-11	2.91749e-11
15	1.33489e-11	1.75336e-11	2.36223e-11	1.62654e-11	1.72078e-11	1.86113e-11	3.68679e-11	1.39806e-11	1.7815e-11	1.4765e-11	4.30914e-11	1.47774e-11	1.69091e-11	1.66944e-11	1.13087e-11	1.9637e-11	1.51131e-11	1.88399e-11	2.9158e-11
15.02	1.33449e-11	1.75254e-11	2.36247e-11	1.62757e-11	1.72036e-11	1.86119e-11	3.68729e-11	1.39807e-11	1.78156e-11	1.47617e-11	4.3096e-11	1.47733e-11	1.69128e-11	1.66946e-11	1.13096e-11	1.96348e-11	1.51156e-11	1.88458e-11	2.91514e-11
15.04	1.33444e-11	1.75243e-11	2.3619e-11	1.6272e-11	1.72047e-11	1.86133e-11	3.68644e-11	1.39751e-11	1.78181e-11	1.47634e-11	4.31012e-11	1.47745e-11	1.69112e-11	1.66993e-11	1.13085e-11	1.96344e-11	1.51178e-11	1.88399e-11	2.917e-11
15.06	1.33473e-11	1.75251e-11	2.3625e-11	1.62713e-11	1.7209e-11	1.86164e-11	3.68649e-11	1.39788e-11	1.78165e-11	1.47653e-11	4.30963e-11	1.4774e-11	1.69105e-11	1.66955e-11	1.13165e-11	1.96372e-11	1.51104e-11	1.88331e-11	2.91514e-11
15.08	1.33526e-11	1.7527e-11	2.36278e-11	1.62715e-11	1.72084e-11	1.86142e-11	3.68682e-11	1.39855e-11	1.7818e-11	1.47636e-11	4.31024e-11	1.4772e-11	1.69139e-11	1.66973e-11	1.13105e-11	1.96437e-11	1.51081e-11	1.88418e-11	2.91594e-11
15.1	1.33458e-11	1.75345e-11	2.36098e-11	1.62697e-11	1.72046e-11	1.86123e-11	3.68593e-11	1.39855e-11	1.7812e-11	1.47644e-11	4.311e-11	1.47735e-11	1.69093e-11	1.66957e-11	1.13193e-11	1.9634e-11	1.51185e-11	1.88422e-11	2.9134e-11
15.12	1.33469e-11	1.75236e-11	2.36119e-11	1.62722e-11	1.72112e-11	1.86099e-11	3.6857e-11	1.3985e-11	1.78137e-11	1.47616e-11	4.31025e-11	1.47743e-11	1.69118e-11	1.67004e-11	1.13186e-11	1.96381e-11	1.51134e-11	1.88405e-11	2.91295e-11
15.14	1.33459e-11	1.75211e-11	2.36145e-11	1.6274e-11	1.72067e-11	1.86003e-11	3.68618e-11	1.39787e-11	1.78144e-11	1.47622e-11	4.31019e-11	1.4772e-11	1.69172e-11	1.66945e-11	1.13117e-11	1.96286e-11	1.51134e-11	1.88405e-11	2.91098e-11
15.16	1.3339e-11	1.75242e-11	2.36125e-11	1.62717e-11	1.72035e-11	1.86056e-11	3.68681e-11	1.39789e-11	1.78131e-11	1.47623e-11	4.31173e-11	1.47728e-11	1.69121e-11	1.66947e-11	1.13142e-11	1.96343e-11	1.51216e-11	1.88358e-11	2.91249e-11
15.18	1.33426e-11	1.75208e-11	2.36146e-11	1.62709e-11	1.72077e-11	1.86021e-11	3.68596e-11	1.39835e-11	1.78147e-11	1.47609e-11	4.31111e-11	1.47739e-11	1.69197e-11	1.6693e-11	1.13154e-11	1.96387e-11	1.51178e-11	1.88379e-11	2.91196e-11
15.2	1.33427e-11	1.75248e-11	2.36109e-11	1.62693e-11	1.72059e-11	1.8597e-11	3.68639e-11	1.39849e-11	1.78148e-11	1.47626e-11	4.3103e-11	1.47727e-11	1.69126e-11	1.66925e-11	1.13163e-11	1.9632e-11	1.51227e-11	1.88348e-11	2.9143e-11
15.22	1.33401e-11	1.75255e-11	2.36217e-11	1.62754e-11	1.72012e-11	1.86013e-11	3.687e-11	1.3984e-11	1.78124e-11	1.47634e-11	4.30948e-11	1.47748e-11	1.69144e-11	1.66869e-11	1.13123e-11	1.96364e-11	1.51146e-11	1.8842e-11	2.9141e-11
15.24	1.33471e-11	1.75235e-11	2.36186e-11	1.62767e-11	1.72023e-11	1.85986e-11	3.68592e-11	1.39758e-11	1.78154e-11	1.47597e-11	4.31115e-11	1.47762e-11	1.69098e-11	1.66889e-11	1.13087e-11	1.96313e-11	1.51206e-11	1.88412e-11	2.91661e-11
15.26	1.33455e-11	1.75229e-11	2.36138e-11	1.62709e-11	1.72054e-11	1.85974e-11	3.68718e-11	1.39788e-11	1.78151e-11	1.47616e-11	4.31074e-11	1.47705e-11	1.69141e-11	1.66926e-11	1.13141e-11	1.96278e-11	1.51104e-11	1.88403e-11	2.91509e-11
15.28	1.33384e-11	1.75213e-11	2.36152e-11	1.62722e-11	1.72012e-11	1.86112e-11	3.6871e-11	1.39793e-11	1.78135e-11	1.47615e-11	4.31e-11	1.47684e-11	1.69139e-11	1.66895e-11	1.13121e-11	1.96376e-11	1.51128e-11	1.88388e-11	2.91706e-11
15.3	1.33425e-11	1.75239e-11	2.36205e-11	1.62748e-11	1.72096e-11	1.86141e-11	3.68771e-11	1.39838e-11	1.7815e-11	1.47629e-11	4.311e-11	1.4772e-11	1.69176e-11	1.66914e-11	1.13151e-11	1.96401e-11	1.51195e-11	1.88445e-11	2.91354e-11
15.32	1.33374e-11	1.75279e-11	2.36197e-11	1.62709e-11	1.72037e-11	1.86115e-11	3.68753e-11	1.39807e-11	1.78152e-11	1.4762e-11	4.30968e-11	1.4773e-11	1.69154e-11	1.66883e-11	1.13173e-11	1.9634e-11	1.51084e-11	1.8845e-11	2.91479e-11
15.34	1.33421e-11	1.75236e-11	2.36192e-11	1.62698e-11	1.72043e-11	1.8612e-11	3.68765e-11	1.39763e-11	1.78164e-11	1.47593e-11	4.30996e-11	1.47754e-11	1.69156e-11	1.66936e-11	1.13118e-11	1.96394e-11	1.51134e-11	1.88424e-11	2.91337e-11
15.36	1.33437e-11	1.75254e-11	2.36132e-11	1.62694e-11	1.72021e-11	1.86106e-11	3.6877e-11	1.3979e-11	1.78178e-11	1.47597e-11	4.30958e-11	1.47764e-11	1.69123e-11	1.66912e-11	1.1313e-11	1.96363e-11	1.51154e-11	1.88435e-11	2.90999e-11
15.38	1.33461e-11	1.75202e-11	2.36121e-11	1.62727e-11	1.72032e-11	1.86133e-11	3.68767e-11	1.3979e-11	1.78123e-11	1.47624e-11	4.30952e-11	1.47744e-11	1.68616e-11	1.6687e-11	1.13121e-11	1.9632e-11	1.5113e-11	1.88438e-11	2.91178e-11
15.4	1.33398e-11	1.75225e-11	2.36193e-11	1.62755e-11	1.72037e-11	1.86079e-11	3.68601e-11	1.39774e-11	1.78131e-11	1.47598e-11	4.30896e-11	1.47691e-11	1.68356e-11	1.66903e-11	1.13101e-11	1.9633e-11	1.51135e-11	1.88471e-11	2.9111e-11
15.42	1.33438e-11	1.75282e-11	2.36064e-11	1.62727e-11	1.72047e-11	1.8614e-11	3.68737e-11	1.39709e-11	1.78128e-11	1.4759e-11	4.31005e-11	1.47707e-11	1.68428e-11	1.66814e-11	1.13121e-11	1.96348e-11	1.51135e-11	1.88358e-11	2.91289e-11
15.44	1.33437e-11	1.75285e-11	2.36137e-11	1.62689e-11	1.72104e-11	1.8608e-11	3.68741e-11	1.39733e-11	1.78213e-11	1.47636e-11	4.30962e-11	1.47674e-11	1.68525e-11	1.66871e-11	1.13094e-11	1.96365e-11	1.51111e-11	1.8839e-11	2.91236e-11
15.46	1.3338e-11	1.75263e-11	2.36067e-11	1.62783e-11	1.72055e-11	1.86123e-11	3.68725e-11	1.39778e-11	1.78186e-11	1.47601e-11	4.30959e-11	1.47719e-11	1.6851e-11	1.66831e-11	1.13149e-11	1.96373e-11	1.51087e-11	1.88361e-11	2.91328e-11
15.48	1.33459e-11	1.75266e-11	2.36027e-11	1.62794e-11	1.72043e-11	1.8612e-11	3.68595e-11	1.39748e-11	1.78162e-11	1.47656e-11	4.30987e-11	1.47758e-11	1.68262e-11	1.66812e-11	1.13148e-11	1.9634e-11	1.51151e-11	1.88359e-11	2.91375e-11
15.5	1.33443e-11	1.75233e-11	2.35883e-11	1.62749e-11	1.7201e-11	1.86093e-11	3.68725e-11	1.39751e-11	1.78162e-11	1.47637e-11	4.30962e-11	1.47734e-11	1.67296e-11	1.66816e-11	1.13149e-11	1.96314e-11	1.51038e-11	1.88351e-11	2.91427e-11
15.52	1.3347e-11	1.75194e-11	2.36031e-11	1.62654e-11	1.7207e-11	1.86069e-11	3.6865e-11	1.3969e-11	1.78173e-11	1.47604e-11	4.30908e-11	1.47714e-11	1.66507e-11	1.66842e-11	1.13093e-11	1.96366e-11	1.51107e-11	1.88328e-11	2.91845e-11
15.54	1.334e-11	1.75266e-11	2.36004e-11	1.62739e-11	1.7202e-11	1.86109e-11	3.68737e-11	1.39787e-11	1.78179e-11	1.47593e-11	4.30871e-11	1.47741e-11	1.66374e-11	1.66806e-11	1.13156e-11	1.96375e-11	1.51058e-11	1.88396e-11	2.93185e-11
15.56	1.33399e-11	1.75227e-11	2.35984e-11	1.62708e-11	1.72054e-11	1.86072e-11	3.68703e-11	1.39706e-11	1.7816e-11	1.47621e-11	4.3079e-11	1.47739e-11	1.66312e-11	1.66827e-11	1.13137e-11	1.96385e-11	1.51036e-11	1.88338e-11	2.94728e-11
15.58	1.33445e-11	1.75239e-11	2.35901e-11	1.62714e-11	1.72044e-11	1.86076e-11	3.68682e-11	1.39793e-11	1.78155e-11	1.47584e-11	4.30868e-11	1.47722e-11	1.66329e-11	1.66787e-11	1.13164e-11	1.96378e-11	1.51107e-11	1.88352e-11	2.95911e-11
15.6	1.3342e-11	1.75275e-11	2.36001e-11	1.62687e-11	1.72016e-11	1.86049e-11	3.68698e-11	1.39715e-11	1.7816e-11	1.47667e-11	4.30724e-11	1.47715e-11	1.66335e-11	1.66828e-11	1.13067e-11	1.96269e-11	1.51058e-11	1.88335e-11	2.95991e-11
15.62	1.33401e-11	1.75327e-11	2.36079e-11	1.62735e-11	1.72044e-11	1.85972e-11	3.68616e-11	1.39702e-11	1.78147e-11	1.47629e-11	4.30644e-11	1.47709e-11	1.66376e-11	1.66849e-11	1.13116e-11	1.96309e-11	1.51043e-11	1.88378e-11	2.96306e-11
15.64	1.3338e-11	1.75264e-11	2.36114e-11	1.62695e-11	1.71995e-11	1.86007e-11	3.68692e-11	1.39665e-11	1.78174e-11	1.47621e-11	4.30659e-11	1.47725e-11	1.66407e-11	1.66872e-11	1.13103e-11	1.96348e-11	1.51057e-11	1.8835e-11	2.96304e-11
15.66	1.33401e-11	1.75293e-11	2.36049e-11	1.62731e-11	1.71975e-11	1.86051e-11	3.6871e-11	1.39732e-11	1.78144e-11	1.47614e-11	4.30705e-11	1.47707e-11	1.66371e-11	1.66833e-11	1.13159e-11	1.96332e-11	1.51102e-11	1.88342e-11	2.96346e-11
15.68	1.33437e-11	1.75251e-11	2.36059e-11	1.6275e-11	1.72039e-11	1.86065e-11	3.68712e-11	1.39761e-11	1.78164e-11	1.4763e-11	4.3091e-11	1.47716e-11	1.66488e-11	1.66838e-11	1.13103e-11	1.96377e-11	1.51024e-11	1.88387e-11	2.96557e-11
15.7	1.33394e-11	1.75278e-11	2.36131e-11	1.6276e-11	1.72016e-11	1.86112e-11	3.68725e-11	1.39636e-11	1.78185e-11	1.47662e-11	4.30633e-11	1.47722e-11	1.665e-11	1.66886e-11	1.13116e-11	1.96372e-11	1.51122e-11	1.88394e-11	2.96676e-11
15.72	1.33435e-11	1.75298e-11	2.36085e-11	1.62758e-11	1.71989e-11	1.86098e-11	3.68641e-11	1.39678e-11	1.78237e-11	1.47645e-11	4.30775e-11	1.47698e-11	1.6652e-11	1.66815e-11	1.13116e-11	1.96334e-11	1.51102e-11	1.88386e-11	2.96887e-11
15.74	1.33442e-11	1.75265e-11	2.36143e-11	1.62735e-11	1.7199e-11	1.86062e-11	3.687e-11	1.39572e-11	1.78225e-11	1.47639e-11	4.30799e-11	1.47691e-11	1.66552e-11	1.6683e-11	1.13103e-11	1.96326e-11	1.51113e-11	1.88377e-11	2.96813e-11
15.76	1.33411e-11	1.75245e-11	2.35979e-11	1.62731e-11	1.71988e-11	1.86085e-11	3.68626e-11	1.39683e-11	1.78211e-11	1.47683e-11	4.30883e-11	1.47725e-11	1.66552e-11	1.66775e-11	1.13116e-11	1.96368e-11	1.51031e-11	1.88329e-11	2.9672e-11
15.78	1.33401e-11	1.75239e-11	2.36019e-11	1.62684e-11	1.71975e-11	1.86111e-11	3.68752e-11	1.39665e-11	1.78157e-11	1.47633e-11	4.30842e-11	1.4771e-11	1.6662e-11	1.66811e-11	1.13118e-11	1.96342e-11	1.51054e-11	1.88365e-11	2.96965e-11
15.8	1.33471e-11	1.75244e-11	2.3599e-11	1.62749e-11	1.71982e-11	1.86074e-11	3.68715e-11	1.3964e-11	1.78156e-11	1.4765e-11	4.30858e-11	1.4772e-11	1.6656e-11	1.66861e-11	1.13181e-11	1.96286e-11	1.51039e-11	1.88265e-11	2.97189e-11
15.82	1.33474e-11	1.75231e-11	2.36082e-11	1.6276e-11	1.72005e-11	1.86112e-11	3.68671e-11	1.39685e-11	1.78198e-11	1.47603e-11	4.3076e-11	1.47723e-11	1.66554e-11	1.66799e-11	1.13178e-11	1.96306e-11	1.51099e-11	1.88393e-11	2.97562e-11
15.84	1.33493e-11	1.75235e-11	2.36086e-11	1.62742e-11	1.71946e-11	1.86076e-11	3.68662e-11	1.3967e-11	1.78158e-11	1.47608e-11	4.3069e-11	1.47683e-11	1.66495e-11	1.66888e-11	1.13198e-11	1.96376e-11	1.51091e-11	1.8841e-11	2.97406e-11
15.86	1.33473e-11	1.75255e-11	2.35959e-11	1.62694e-11	1.72037e-11	1.86091e-11	3.68649e-11	1.39644e-11	1.7821e-11	1.47655e-11	4.30742e-11	1.47709e-11	1.66522e-11	1.66847e-11	1.13126e-11	1.96316e-11	1.51075e-11	1.88341e-11	2.97494e-11
15.88	1.33445e-11	1.75231e-11	2.35999e-11	1.62747e-11	1.71931e-11	1.86094e-11	3.68699e-11	1.3968e-11	1.78166e-11	1.47629e-11	4.30853e-11	1.47703e-11	1.66575e-11	1.66834e-11	1.13087e-11	1.96321e-11	1.51104e-11	1.88349e-11	2.97623e-11
15.9	1.3346e-11	1.75224e-11	2.35913e-11	1.62727e-11	1.71959e-11	1.86101e-11	3.68718e-11	1.39624e-11	1.7825e-11	1.47621e-11	4.30845e-11	1.4771e-11	1.66542e-11	1.66843e-11	1.13168e-11	1.96321e-11	1.51094e-11	1.88335e-11	2.97664e-11
15.92	1.33466e-11	1.75287e-11	2.35923e-11	1.62733e-11	1.71946e-11	1.86086e-11	3.68754e-11	1.39693e-11	1.78233e-11	1.47581e-11	4.30906e-11	1.47654e-11	1.66474e-11	1.66821e-11	1.13107e-11	1.96376e-11	1.51112e-11	1.88305e-11	2.97699e-11
15.94	1.33444e-11	1.75245e-11	2.35968e-11	1.62703e-11	1.72009e-11	1.86095e-11	3.68716e-11	1.39693e-11	1.78161e-11	1.47608e-11	4.30739e-11	1.47654e-11	1.66526e-11	1.6686e-11	1.13143e-11	1.96291e-11	1.51203e-11	1.8832e-11	2.97824e-11
15.96	1.33441e-11	1.75171e-11	2.35903e-11	1.62775e-11	1.71956e-11	1.86102e-11	3.68715e-11	1.39671e-11	1.78198e-11	1.47639e-11	4.3086e-11	1.47716e-11	1.66481e-11	1.66863e-11	1.13169e-11	1.96301e-11	1.5117e-11	1.88365e-11	2.97954e-11
15.98	1.33441e-11	1.7527e-11	2.36016e-11	1.62604e-11	1.71977e-11	1.86109e-11	3.68712e-11	1.3968e-11	1.78258e-11	1.47632e-11	4.30878e-11	1.4766e-11	1.66459e-11	1.66826e-11	1.13114e-11	1.9634e-11	1.51083e-11	1.8833e-11	2.98044e-11
16	1.33434e-11	1.75205e-11	2.35987e-11	1.62422e-11	1.72005e-11	1.8605e-11	3.68743e-11	1.39686e-11	1.78186e-11	1.47612e-11	4.30987e-11	1.47664e-11	1.6654e-11	1.66864e-11	1.13121e-11	1.96328e-11	1.5107e-11	1.88365e-11	2.97935e-11
16.02	1.33467e-11	1.75203e-11	2.3597e-11	1.62359e-11	1.71988e-11	1.86033e-11	3.68738e-11	1.39674e-11	1.78144e-11	1.47655e-11	4.3084e-11	1.47707e-11	1.6649e-11	1.6688e-11	1.13162e-11	1.96309e-11	1.51083e-11	1.88384e-11	2.98035e-11
16.04	1.33467e-11	1.75217e-11	2.36061e-11	1.62408e-11	1.71931e-11	1.85998e-11	3.68663e-11	1.39684e-11	1.78161e-11	1.47609e-11	4.30859e-11	1.47724e-11	1.66442e-11	1.668e-11	1.13092e-11	1.96343e-11	1.51118e-11	1.88361e-11	2.98292e-11
16.06	1.33393e-11	1.75302e-11	2.3603e-11	1.62416e-11	1.71991e-11	1.86052e-11	3.68734e-11	1.39621e-11	1.78196e-11	1.47629e-11	4.30975e-11	1.47694e-11	1.66421e-11	1.66794e-11	1.13102e-11	1.9634e-11	1.5112e-11	1.88365e-11	2.98144e-11
16.08	1.3346e-11	1.75227e-11	2.3599e-11	1.62261e-11	1.71994e-11	1.86044e-11	3.68772e-11	1.3973e-11	1.78233e-11	1.4763e-11	4.30889e-11	1.47704e-11	1.66436e-11	1.66872e-11	1.1314e-11	1.96294e-11	1.5111e-11	1.88309e-11	2.98346e-11
16.1	1.33441e-11	1.75256e-11	2.36072e-11	1.61721e-11	1.71974e-11	1.86106e-11	3.68799e-11	1.39638e-11	1.7818e-11	1.47607e-11	4.30916e-11	1.47728e-11	1.66404e-11	1.66867e-11	1.13119e-11	1.96336e-11	1.51105e-11	1.8844e-11	2.98493e-11
16.12	1.33404e-11	1.75306e-11	2.35982e-11	1.61376e-11	1.71943e-11	1.86086e-11	3.68686e-11	1.39615e-11	1.78195e-11	1.47614e-11	4.30984e-11	1.47724e-11	1.66468e-11	1.66837e-11	1.13083e-11	1.96332e-11	1.51054e-11	1.88381e-11	2.98415e-11
16.14	1.33405e-11	1.75257e-11	2.3598e-11	1.6116e-11	1.71965e-11	1.86078e-11	3.68701e-11	1.39666e-11	1.78222e-11	1.47593e-11	4.30818e-11	1.47685e-11	1.66443e-11	1.66888e-11	1.13116e-11	1.96315e-11	1.51055e-11	1.88349e-11	2.98631e-11
16.16	1.3342e-11	1.75245e-11	2.36053e-11	1.61088e-11	1.71991e-11	1.8604e-11	3.68682e-11	1.39682e-11	1.78219e-11	1.47616e-11	4.30839e-11	1.47716e-11	1.66446e-11	1.66855e-11	1.13131e-11	1.96328e-11	1.51089e-11	1.88426e-11	2.98772e-11
16.18	1.33419e-11	1.75268e-11	2.36019e-11	1.60975e-11	1.7204e-11	1.86088e-11	3.687e-11	1.39614e-11	1.78191e-11	1.47602e-11	4.30943e-11	1.47638e-11	1.66421e-11	1.66864e-11	1.13166e-11	1.96335e-11	1.51039e-11	1.88358e-11	2.98612e-11
16.2	1.33423e-11	1.75283e-11	2.36098e-11	1.61001e-11	1.71955e-11	1.86092e-11	3.68752e-11	1.39646e-11	1.78151e-11	1.47585e-11	4.30873e-11	1.47711e-11	1.66373e-11	1.66852e-11	1.13102e-11	1.96326e-11	1.51107e-11	1.8832e-11	2.98644e-11
16.22	1.33421e-11	1.75264e-11	2.36066e-11	1.60991e-11	1.71994e-11	1.86049e-11	3.68788e-11	1.39662e-11	1.78185e-11	1.47605e-11	4.30825e-11	1.47674e-11	1.66353e-11	1.66885e-11	1.13155e-11	1.96338e-11	1.51173e-11	1.88465e-11	2.98837e-11
16.24	1.3341e-11	1.75254e-11	2.36234e-11	1.61001e-11	1.71991e-11	1.86028e-11	3.68769e-11	1.39658e-11	1.78181e-11	1.4762e-11	4.31038e-11	1.47668e-11	1.66389e-11	1.66862e-11	1.13118e-11	1.96348e-11	1.51139e-11	1.88363e-11	2.98965e-11
16.26	1.33439e-11	1.75255e-11	2.36095e-11	1.60955e-11	1.71961e-11	1.86091e-11	3.68807e-11	1.39598e-11	1.7819e-11	1.47609e-11	4.31009e-11	1.47653e-11	1.6636e-11	1.66818e-11	1.13102e-11	1.96377e-11	1.51095e-11	1.88368e-11	2.98825e-11
16.28	1.33407e-11	1.75282e-11	2.36135e-11	1.60986e-11	1.72002e-11	1.86068e-11	3.68792e-11	1.39678e-11	1.78209e-11	1.47605e-11	4.31e-11	1.47684e-11	1.66374e-11	1.66836e-11	1.13083e-11	1.96386e-11	1.5112e-11	1.88375e-11	2.98794e-11
16.3	1.33464e-11	1.75239e-11	2.36018e-11	1.61054e-11	1.72011e-11	1.86051e-11	3.68844e-11	1.39618e-11	1.78203e-11	1.4766e-11	4.30906e-11	1.47614e-11	1.6641e-11	1.66837e-11	1.13092e-11	1.96321e-11	1.51149e-11	1.88471e-11	2.98813e-11
16.32	1.33422e-11	1.75302e-11	2.36077e-11	1.61033e-11	1.72005e-11	1.86083e-11	3.68731e-11	1.39661e-11	1.78141e-11	1.4764e-11	4.30836e-11	1.47631e-11	1.66379e-11	1.66874e-11	1.13117e-11	1.96351e-11	1.51091e-11	1.88378e-11	2.98891e-11
16.34	1.33463e-11	1.75327e-11	2.36071e-11	1.61038e-11	1.71989e-11	1.86061e-11	3.68794e-11	1.39633e-11	1.78207e-11	1.47611e-11	4.30976e-11	1.47638e-11	1.66301e-11	1.66856e-11	1.1309e-11	1.96298e-11	1.5112e-11	1.88414e-11	2.98933e-11
16.36	1.3341e-11	1.75329e-11	2.361e-11	1.61007e-11	1.71941e-11	1.8608e-11	3.68794e-11	1.39638e-11	1.78153e-11	1.4766e-11	4.30961e-11	1.47668e-11	1.66363e-11	1.6678e-11	1.13125e-11	1.96294e-11	1.51105e-11	1.88421e-11	2.98986e-11
16.38	1.33439e-11	1.75319e-11	2.36049e-11	1.6106e-11	1.71965e-11	1.86025e-11	3.68751e-11	1.39586e-11	1.78168e-11	1.4761e-11	4.31072e-11	1.47617e-11	1.66335e-11	1.66836e-11	1.13087e-11	1.96323e-11	1.51002e-11	1.88401e-11	2.98896e-11
16.4	1.33439e-11	1.75377e-11	2.36083e-11	1.61085e-11	1.72038e-11	1.86065e-11	3.68708e-11	1.39656e-11	1.78171e-11	1.47572e-11	4.31031e-11	1.47623e-11	1.6632e-11	1.66788e-11	1.13097e-11	1.96287e-11	1.51109e-11	1.88313e-11	2.98812e-11
16.42	1.33397e-11	1.7531e-11	2.35963e-11	1.61016e-11	1.72011e-11	1.86043e-11	3.68718e-11	1.39655e-11	1.78156e-11	1.47584e-11	4.30733e-11	1.47664e-11	1.66351e-11	1.66797e-11	1.1315e-11	1.96339e-11	1.51112e-11	1.88417e-11	2.98883e-11
16.44	1.33443e-11	1.75365e-11	2.36223e-11	1.61e-11	1.71985e-11	1.86061e-11	3.68681e-11	1.39637e-11	1.78217e-11	1.47574e-11	4.30926e-11	1.47636e-11	1.66339e-11	1.66754e-11	1.1314e-11	1.96355e-11	1.51132e-11	1.88487e-11	2.98826e-11
16.46	1.33373e-11	1.7535e-11	2.36136e-11	1.6102e-11	1.71959e-11	1.86031e-11	3.68729e-11	1.396e-11	1.78173e-11	1.47611e-11	4.30974e-11	1.47709e-11	1.66342e-11	1.66842e-11	1.13102e-11	1.96314e-11	1.51121e-11	1.88407e-11	2.99081e-11
16.48	1.33361e-11	1.75311e-11	2.36096e-11	1.60982e-11	1.71973e-11	1.85993e-11	3.68687e-11	1.39628e-11	1.78154e-11	1.47603e-11	4.30916e-11	1.47637e-11	1.66298e-11	1.66792e-11	1.13112e-11	1.96328e-11	1.51163e-11	1.88407e-11	2.99161e-11
16.5	1.33355e-11	1.75326e-11	2.35943e-11	1.61042e-11	1.71951e-11	1.85946e-11	3.68666e-11	1.39691e-11	1.78243e-11	1.47593e-11	4.30824e-11	1.47637e-11	1.6635e-11	1.66818e-11	1.13129e-11	1.96301e-11	1.51127e-11	1.88426e-11	2.99091e-11
16.52	1.33345e-11	1.7527e-11	2.35908e-11	1.60986e-11	1.71979e-11	1.85905e-11	3.68727e-11	1.39626e-11	1.78172e-11	1.47622e-11	4.3097e-11	1.47626e-11	1.66347e-11	1.66779e-11	1.13113e-11	1.96339e-11	1.51134e-11	1.88408e-11	2.98922e-11
16.54	1.33367e-11	1.75305e-11	2.36101e-11	1.61021e-11	1.71925e-11	1.8593e-11	3.68682e-11	1.39641e-11	1.78225e-11	1.47569e-11	4.30965e-11	1.47677e-11	1.66326e-11	1.66774e-11	1.13151e-11	1.96312e-11	1.51162e-11	1.88394e-11	2.99046e-11
16.56	1.33403e-11	1.75294e-11	2.35933e-11	1.60979e-11	1.7194e-11	1.85971e-11	3.68711e-11	1.39554e-11	1.78136e-11	1.47613e-11	4.30919e-11	1.4766e-11	1.66309e-11	1.66801e-11	1.13056e-11	1.96363e-11	1.51165e-11	1.88355e-11	2.98877e-11
16.58	1.33428e-11	1.75288e-11	2.35963e-11	1.61017e-11	1.71958e-11	1.85893e-11	3.68645e-11	1.396e-11	1.78165e-11	1.47626e-11	4.30885e-11	1.47651e-11	1.66247e-11	1.66804e-11	1.13156e-11	1.96347e-11	1.51115e-11	1.88405e-11	2.99012e-11
16.6	1.33442e-11	1.75274e-11	2.35932e-11	1.60929e-11	1.71953e-11	1.85979e-11	3.68682e-11	1.39624e-11	1.78193e-11	1.47648e-11	4.31e-11	1.47669e-11	1.6626e-11	1.66838e-11	1.13108e-11	1.96297e-11	1.51117e-11	1.88387e-11	2.99157e-11
16.62	1.33429e-11	1.7526e-11	2.35941e-11	1.61014e-11	1.71903e-11	1.85918e-11	3.68704e-11	1.39635e-11	1.78206e-11	1.47648e-11	4.30924e-11	1.4762e-11	1.66293e-11	1.66803e-11	1.13137e-11	1.96345e-11	1.51102e-11	1.88367e-11	2.99114e-11
16.64	1.33417e-11	1.75169e-11	2.3601e-11	1.60976e-11	1.71951e-11	1.8591e-11	3.68708e-11	1.39606e-11	1.78159e-11	1.47608e-11	4.30951e-11	1.4766e-11	1.66336e-11	1.66817e-11	1.1313e-11	1.96291e-11	1.51113e-11	1.88388e-11	2.99003e-11
16.66	1.33349e-11	1.75259e-11	2.35982e-11	1.60979e-11	1.71963e-11	1.85902e-11	3.68735e-11	1.39623e-11	1.78133e-11	1.47557e-11	4.30812e-11	1.47639e-11	1.66328e-11	1.6683e-11	1.13107e-11	1.96274e-11	1.51169e-11	1.88391e-11	2.98975e-11
16.68	1.33314e-11	1.75273e-11	2.36057e-11	1.60973e-11	1.71937e-11	1.85912e-11	3.68631e-11	1.39646e-11	1.78158e-11	1.47626e-11	4.30931e-11	1.47642e-11	1.66273e-11	1.66798e-11	1.13142e-11	1.96341e-11	1.51102e-11	1.88383e-11	2.99097e-11
16.7	1.33371e-11	1.7526e-11	2.35983e-11	1.60971e-11	1.71971e-11	1.85917e-11	3.68729e-11	1.3969e-11	1.78156e-11	1.47645e-11	4.30983e-11	1.47596e-11	1.66333e-11	1.66783e-11	1.13132e-11	1.9632e-11	1.51119e-11	1.88421e-11	2.99125e-11
16.72	1.33314e-11	1.75265e-11	2.36025e-11	1.60975e-11	1.71957e-11	1.8592e-11	3.68714e-11	1.39643e-11	1.78141e-11	1.47612e-11	4.30792e-11	1.47612e-11	1.66328e-11	1.66805e-11	1.13158e-11	1.96326e-11	1.51136e-11	1.88384e-11	2.99037e-11
16.74	1.33294e-11	1.75245e-11	2.35958e-11	1.60941e-11	1.71948e-11	1.86068e-11	3.68705e-11	1.39655e-11	1.78206e-11	1.47584e-11	4.30959e-11	1.4765e-11	1.66238e-11	1.66821e-11	1.13098e-11	1.96329e-11	1.51114e-11	1.88441e-11	2.9915e-11
16.76	1.33337e-11	1.7517e-11	2.36069e-11	1.6089e-11	1.7195e-11	1.86072e-11	3.68681e-11	1.39584e-11	1.78216e-11	1.47576e-11	4.30967e-11	1.47624e-11	1.66245e-11	1.66825e-11	1.13114e-11	1.96228e-11	1.51105e-11	1.88378e-11	2.99076e-11
16.78	1.33331e-11	1.75174e-11	2.35995e-11	1.60962e-11	1.72002e-11	1.86031e-11	3.68644e-11	1.39637e-11	1.78172e-11	1.4766e-11	4.30871e-11	1.47636e-11	1.66306e-11	1.66826e-11	1.13082e-11	1.96329e-11	1.51144e-11	1.88407e-11	2.99116e-11
16.8	1.33281e-11	1.75254e-11	2.36008e-11	1.60941e-11	1.71995e-11	1.86058e-11	3.68672e-11	1.39543e-11	1.78148e-11	1.47601e-11	4.3074e-11	1.47629e-11	1.66289e-11	1.66786e-11	1.13125e-11	1.96326e-11	1.51147e-11	1.88334e-11	2.99253e-11
16.82	1.33343e-11	1.75184e-11	2.36068e-11	1.60873e-11	1.71916e-11	1.86053e-11	3.68625e-11	1.39583e-11	1.7814e-11	1.476e-11	4.30801e-11	1.4764e-11	1.66233e-11	1.66785e-11	1.13164e-11	1.96315e-11	1.51144e-11	1.88407e-11	2.98953e-11
16.84	1.33292e-11	1.75191e-11	2.36106e-11	1.60946e-11	1.71926e-11	1.86006e-11	3.68711e-11	1.39591e-11	1.78199e-11	1.47575e-11	4.30782e-11	1.47634e-11	1.66238e-11	1.66863e-11	1.13122e-11	1.96278e-11	1.51138e-11	1.8839e-11	2.98879e-11
16.86	1.33344e-11	1.75273e-11	2.36079e-11	1.6093e-11	1.71984e-11	1.86068e-11	3.68715e-11	1.39591e-11	1.78136e-11	1.4763e-11	4.30858e-11	1.4763e-11	1.66254e-11	1.66854e-11	1.13152e-11	1.96313e-11	1.51114e-11	1.88389e-11	2.99162e-11
16.88	1.33368e-11	1.75224e-11	2.36005e-11	1.60933e-11	1.71968e-11	1.86031e-11	3.68731e-11	1.39588e-11	1.78157e-11	1.47669e-11	4.30735e-11	1.47631e-11	1.66241e-11	1.66852e-11	1.13166e-11	1.96263e-11	1.51066e-11	1.88506e-11	2.98899e-11
16.9	1.3333e-11	1.75197e-11	2.35955e-11	1.60873e-11	1.71946e-11	1.86048e-11	3.68632e-11	1.39562e-11	1.78201e-11	1.47577e-11	4.30777e-11	1.47591e-11	1.66204e-11	1.66807e-11	1.13112e-11	1.9624e-11	1.51154e-11	1.88405e-11	2.99075e-11
16.92	1.33344e-11	1.75212e-11	2.36106e-11	1.60863e-11	1.7197e-11	1.86024e-11	3.68611e-11	1.39589e-11	1.78172e-11	1.47632e-11	4.30819e-11	1.47633e-11	1.6625e-11	1.66782e-11	1.13124e-11	1.96227e-11	1.51138e-11	1.88348e-11	2.98932e-11
16.94	1.33347e-11	1.75147e-11	2.36175e-11	1.60923e-11	1.71901e-11	1.85982e-11	3.68613e-11	1.39625e-11	1.78131e-11	1.47592e-11	4.30773e-11	1.47576e-11	1.66248e-11	1.66809e-11	1.131e-11	1.96282e-11	1.51153e-11	1.88382e-11	2.99036e-11
16.96	1.33371e-11	1.75181e-11	2.36181e-11	1.60921e-11	1.71859e-11	1.86048e-11	3.68618e-11	1.39662e-11	1.78159e-11	1.47601e-11	4.30863e-11	1.47626e-11	1.66174e-11	1.66785e-11	1.13153e-11	1.96293e-11	1.51117e-11	1.88335e-11	2.98907e-11
16.98	1.33342e-11	1.75228e-11	2.36108e-11	1.6095e-11	1.71864e-11	1.85997e-11	3.68636e-11	1.39608e-11	1.78185e-11	1.47631e-11	4.3092e-11	1.47644e-11	1.66217e-11	1.66774e-11	1.13138e-11	1.96316e-11	1.51111e-11	1.88322e-11	2.98899e-11
17	1.33365e-11	1.75213e-11	2.36122e-11	1.60952e-11	1.71949e-11	1.86016e-11	3.68665e-11	1.39615e-11	1.7817e-11	1.47643e-11	4.30776e-11	1.47613e-11	1.66282e-11	1.66814e-11	1.13057e-11	1.96292e-11	1.51107e-11	1.88303e-11	2.99105e-11
17.02	1.33329e-11	1.75244e-11	2.36229e-11	1.61012e-11	1.71991e-11	1.86074e-11	3.68649e-11	1.39577e-11	1.78166e-11	1.47659e-11	4.3092e-11	1.47634e-11	1.6622e-11	1.66797e-11	1.13127e-11	1.9633e-11	1.5106e-11	1.88231e-11	2.98984e-11
17.04	1.33369e-11	1.75182e-11	2.36086e-11	1.60975e-11	1.71943e-11	1.86033e-11	3.68636e-11	1.39568e-11	1.78184e-11	1.47592e-11	4.30986e-11	1.47649e-11	1.66228e-11	1.66789e-11	1.13104e-11	1.9626e-11	1.511e-11	1.87978e-11	2.98901e-11
17.06	1.33322e-11	1.75178e-11	2.36197e-11	1.60858e-11	1.71896e-11	1.86006e-11	3.68644e-11	1.39527e-11	1.78151e-11	1.47632e-11	4.30933e-11	1.47687e-11	1.66223e-11	1.66821e-11	1.13093e-11	1.96283e-11	1.51133e-11	1.87799e-11	2.9903e-11
17.08	1.3339e-11	1.75121e-11	2.36075e-11	1.60896e-11	1.71921e-11	1.86023e-11	3.68645e-11	1.39619e-11	1.78158e-11	1.47625e-11	4.30813e-11	1.47597e-11	1.66209e-11	1.66794e-11	1.13166e-11	1.96286e-11	1.51151e-11	1.87338e-11	2.99052e-11
17.1	1.33332e-11	1.75178e-11	2.36042e-11	1.60872e-11	1.71913e-11	1.86042e-11	3.68676e-11	1.3954e-11	1.78133e-11	1.4766e-11	4.31033e-11	1.47626e-11	1.66249e-11	1.66795e-11	1.13098e-11	1.96304e-11	1.51134e-11	1.86601e-11	2.98717e-11
17.12	1.33348e-11	1.75169e-11	2.36162e-11	1.60945e-11	1.71926e-11	1.86022e-11	3.68583e-11	1.39585e-11	1.78172e-11	1.47609e-11	4.30926e-11	1.47618e-11	1.66236e-11	1.66825e-11	1.13104e-11	1.96256e-11	1.51117e-11	1.85847e-11	2.9903e-11
17.14	1.33384e-11	1.7514e-11	2.36188e-11	1.60947e-11	1.71998e-11	1.85966e-11	3.68663e-11	1.39571e-11	1.78127e-11	1.4759e-11	4.30867e-11	1.47594e-11	1.66224e-11	1.66875e-11	1.13067e-11	1.96289e-11	1.51088e-11	1.85485e-11	2.98924e-11
17.16	1.33346e-11	1.75113e-11	2.36143e-11	1.60886e-11	1.71895e-11	1.86047e-11	3.6864e-11	1.39614e-11	1.78141e-11	1.4764e-11	4.30988e-11	1.4763e-11	1.66259e-11	1.66818e-11	1.1308e-11	1.96265e-11	1.51061e-11	1.85176e-11	2.98855e-11
17.18	1.33346e-11	1.75167e-11	2.36195e-11	1.60873e-11	1.71933e-11	1.85989e-11	3.6863e-11	1.3963e-11	1.78172e-11	1.47578e-11	4.30903e-11	1.4759e-11	1.66274e-11	1.66797e-11	1.13123e-11	1.96341e-11	1.51057e-11	1.85166e-11	2.99019e-11
17.2	1.33372e-11	1.75223e-11	2.36091e-11	1.60878e-11	1.71943e-11	1.86027e-11	3.68679e-11	1.39602e-11	1.781e-11	1.47608e-11	4.30824e-11	1.47659e-11	1.66163e-11	1.66828e-11	1.13123e-11	1.96294e-11	1.51071e-11	1.85076e-11	2.99066e-11
17.22	1.33407e-11	1.75206e-11	2.36106e-11	1.60901e-11	1.7191e-11	1.86038e-11	3.68638e-11	1.39588e-11	1.78128e-11	1.47601e-11	4.30966e-11	1.47605e-11	1.66231e-11	1.66876e-11	1.1311e-11	1.96256e-11	1.51051e-11	1.85176e-11	2.98937e-11
17.24	1.33422e-11	1.75167e-11	2.36096e-11	1.60872e-11	1.71935e-11	1.8601e-11	3.68581e-11	1.39595e-11	1.7812e-11	1.47582e-11	4.31096e-11	1.47594e-11	1.66162e-11	1.66831e-11	1.13074e-11	1.9625e-11	1.51032e-11	1.85172e-11	2.98886e-11
17.26	1.33402e-11	1.7524e-11	2.36025e-11	1.60852e-11	1.71954e-11	1.8595e-11	3.68641e-11	1.3959e-11	1.78168e-11	1.47604e-11	4.30893e-11	1.47632e-11	1.66203e-11	1.6682e-11	1.13119e-11	1.96237e-11	1.51056e-11	1.8519e-11	2.98924e-11
17.28	1.33397e-11	1.75325e-11	2.36011e-11	1.60854e-11	1.71968e-11	1.85886e-11	3.68585e-11	1.39555e-11	1.78165e-11	1.47598e-11	4.30974e-11	1.47642e-11	1.66182e-11	1.66764e-11	1.13102e-11	1.96242e-11	1.51064e-11	1.85188e-11	2.98876e-11
17.3	1.33441e-11	1.75244e-11	2.36061e-11	1.60917e-11	1.71896e-11	1.85939e-11	3.68588e-11	1.39555e-11	1.78161e-11	1.47562e-11	4.31084e-11	1.47589e-11	1.66178e-11	1.6682e-11	1.13152e-11	1.96262e-11	1.51102e-11	1.8512e-11	2.98743e-11
17.32	1.33429e-11	1.75344e-11	2.36e-11	1.60894e-11	1.71993e-11	1.8593e-11	3.68623e-11	1.39498e-11	1.78114e-11	1.47581e-11	4.30889e-11	1.47634e-11	1.66217e-11	1.66822e-11	1.13083e-11	1.96207e-11	1.5108e-11	1.85196e-11	2.98816e-11
17.34	1.33379e-11	1.75155e-11	2.36002e-11	1.60874e-11	1.71948e-11	1.85905e-11	3.68704e-11	1.39569e-11	1.78159e-11	1.47655e-11	4.30849e-11	1.47609e-11	1.66171e-11	1.66807e-11	1.13092e-11	1.96202e-11	1.51097e-11	1.85297e-11	2.98857e-11
17.36	1.33358e-11	1.75132e-11	2.36013e-11	1.60815e-11	1.72e-11	1.85917e-11	3.68623e-11	1.39665e-11	1.78209e-11	1.47601e-11	4.30781e-11	1.47631e-11	1.66202e-11	1.66842e-11	1.13144e-11	1.96258e-11	1.51088e-11	1.85269e-11	2.98651e-11
17.38	1.33332e-11	1.75326e-11	2.3603e-11	1.6086e-11	1.71963e-11	1.85887e-11	3.68711e-11	1.39479e-11	1.78179e-11	1.47579e-11	4.30765e-11	1.47627e-11	1.66159e-11	1.66781e-11	1.13111e-11	1.9623e-11	1.51071e-11	1.85316e-11	2.98682e-11
17.4	1.33352e-11	1.75173e-11	2.36058e-11	1.60848e-11	1.71948e-11	1.85983e-11	3.68687e-11	1.39569e-11	1.78128e-11	1.47593e-11	4.3086e-11	1.47613e-11	1.66222e-11	1.66807e-11	1.13137e-11	1.96256e-11	1.51079e-11	1.85307e-11	2.98744e-11
17.42	1.33361e-11	1.75209e-11	2.36132e-11	1.6084e-11	1.71949e-11	1.86056e-11	3.68745e-11	1.39623e-11	1.78183e-11	1.47603e-11	4.30935e-11	1.47663e-11	1.66154e-11	1.66771e-11	1.13083e-11	1.96236e-11	1.51083e-11	1.85304e-11	2.9866e-11
17.44	1.33291e-11	1.75146e-11	2.36031e-11	1.6081e-11	1.71883e-11	1.86018e-11	3.68719e-11	1.39573e-11	1.78188e-11	1.47625e-11	4.30836e-11	1.47619e-11	1.66184e-11	1.66797e-11	1.13093e-11	1.96297e-11	1.51046e-11	1.85337e-11	2.98439e-11
17.46	1.33345e-11	1.75112e-11	2.36123e-11	1.60802e-11	1.71858e-11	1.85967e-11	3.68675e-11	1.39671e-11	1.78152e-11	1.47565e-11	4.30794e-11	1.47623e-11	1.66138e-11	1.66835e-11	1.13064e-11	1.96239e-11	1.51023e-11	1.85313e-11	2.98723e-11
17.48	1.33306e-11	1.75146e-11	2.36012e-11	1.60836e-11	1.71921e-11	1.85988e-11	3.68689e-11	1.39595e-11	1.78194e-11	1.47627e-11	4.30677e-11	1.47636e-11	1.66162e-11	1.66815e-11	1.1306e-11	1.96194e-11	1.51078e-11	1.85304e-11	2.98824e-11
17.5	1.33318e-11	1.75199e-11	2.36068e-11	1.60865e-11	1.71945e-11	1.85989e-11	3.68686e-11	1.39597e-11	1.78177e-11	1.47597e-11	4.30787e-11	1.47644e-11	1.6617e-11	1.66801e-11	1.13105e-11	1.96209e-11	1.51113e-11	1.85354e-11	2.98822e-11
17.52	1.33307e-11	1.75232e-11	2.35951e-11	1.60799e-11	1.71935e-11	1.86011e-11	3.6867e-11	1.39581e-11	1.78234e-11	1.47659e-11	4.30785e-11	1.47682e-11	1.66107e-11	1.66745e-11	1.13155e-11	1.96204e-11	1.5107e-11	1.85286e-11	2.98995e-11
17.54	1.33356e-11	1.75251e-11	2.35924e-11	1.60793e-11	1.71952e-11	1.86032e-11	3.68663e-11	1.39649e-11	1.78187e-11	1.47607e-11	4.3071e-11	1.47618e-11	1.66162e-11	1.66766e-11	1.13157e-11	1.96228e-11	1.51063e-11	1.85358e-11	2.98885e-11
17.56	1.33294e-11	1.75195e-11	2.35966e-11	1.60819e-11	1.71918e-11	1.8597e-11	3.68647e-11	1.396e-11	1.78209e-11	1.47639e-11	4.30624e-11	1.47646e-11	1.66155e-11	1.66783e-11	1.13093e-11	1.9628e-11	1.51114e-11	1.85291e-11	2.98917e-11
17.58	1.33247e-11	1.7516e-11	2.3603e-11	1.60782e-11	1.71869e-11	1.85982e-11	3.68708e-11	1.39586e-11	1.78134e-11	1.47605e-11	4.30738e-11	1.47587e-11	1.66186e-11	1.66747e-11	1.13054e-11	1.96206e-11	1.5107e-11	1.85251e-11	2.98858e-11
17.6	1.33293e-11	1.75207e-11	2.35967e-11	1.60805e-11	1.71906e-11	1.85985e-11	3.6872e-11	1.39584e-11	1.78091e-11	1.47645e-11	4.30617e-11	1.47587e-11	1.66143e-11	1.66794e-11	1.13108e-11	1.96186e-11	1.51088e-11	1.85299e-11	2.98743e-11
17.62	1.33294e-11	1.75201e-11	2.35982e-11	1.60798e-11	1.7192e-11	1.85996e-11	3.68733e-11	1.39607e-11	1.78177e-11	1.47589e-11	4.30795e-11	1.47622e-11	1.66154e-11	1.66774e-11	1.13082e-11	1.96234e-11	1.51084e-11	1.85261e-11	2.98978e-11
17.64	1.3328e-11	1.75201e-11	2.36001e-11	1.60794e-11	1.71866e-11	1.86021e-11	3.68717e-11	1.39543e-11	1.78238e-11	1.47593e-11	4.30766e-11	1.47622e-11	1.66149e-11	1.66772e-11	1.13068e-11	1.96193e-11	1.51099e-11	1.85297e-11	2.98835e-11
17.66	1.33235e-11	1.7521e-11	2.35965e-11	1.60757e-11	1.71847e-11	1.85988e-11	3.68731e-11	1.39494e-11	1.78214e-11	1.47637e-11	4.30567e-11	1.47624e-11	1.66154e-11	1.66764e-11	1.13086e-11	1.96236e-11	1.51128e-11	1.85272e-11	2.98883e-11
17.68	1.33258e-11	1.75176e-11	2.36049e-11	1.60773e-11	1.71954e-11	1.86006e-11	3.68734e-11	1.39553e-11	1.78178e-11	1.47625e-11	4.30603e-11	1.47677e-11	1.66151e-11	1.66828e-11	1.13079e-11	1.96191e-11	1.51104e-11	1.85264e-11	2.98756e-11
17.7	1.33274e-11	1.75215e-11	2.3603e-11	1.60744e-11	1.71851e-11	1.8596e-11	3.68735e-11	1.39513e-11	1.78185e-11	1.4764e-11	4.30744e-11	1.47591e-11	1.66212e-11	1.66837e-11	1.13134e-11	1.96204e-11	1.51059e-11	1.8527e-11	2.98651e-11
17.72	1.33225e-11	1.75209e-11	2.36073e-11	1.60794e-11	1.71886e-11	1.86006e-11	3.68748e-11	1.3949e-11	1.78149e-11	1.47597e-11	4.30654e-11	1.47603e-11	1.66146e-11	1.66796e-11	1.13112e-11	1.96264e-11	1.511e-11	1.85297e-11	2.98898e-11
17.74	1.33107e-11	1.75143e-11	2.35974e-11	1.60757e-11	1.71898e-11	1.86004e-11	3.68751e-11	1.39466e-11	1.78149e-11	1.47587e-11	4.30524e-11	1.47622e-11	1.66136e-11	1.66812e-11	1.13091e-11	1.96249e-11	1.5109e-11	1.85186e-11	2.98809e-11
17.76	1.33086e-11	1.75203e-11	2.36092e-11	1.60751e-11	1.71895e-11	1.85959e-11	3.68738e-11	1.39476e-11	1.782e-11	1.47594e-11	4.30659e-11	1.47625e-11	1.66123e-11	1.66817e-11	1.13052e-11	1.96207e-11	1.51072e-11	1.8523e-11	2.98741e-11
17.78	1.33112e-11	1.7516e-11	2.36082e-11	1.60794e-11	1.71959e-11	1.86024e-11	3.68774e-11	1.39524e-11	1.78157e-11	1.47612e-11	4.3064e-11	1.47603e-11	1.66142e-11	1.66793e-11	1.13076e-11	1.96246e-11	1.51054e-11	1.85129e-11	2.98752e-11
17.8	1.3308e-11	1.75144e-11	2.36015e-11	1.60753e-11	1.71877e-11	1.8596e-11	3.68708e-11	1.39486e-11	1.7815e-11	1.47593e-11	4.30584e-11	1.47638e-11	1.66137e-11	1.66783e-11	1.1311e-11	1.96251e-11	1.51041e-11	1.85107e-11	2.98908e-11
17.82	1.33085e-11	1.75156e-11	2.36053e-11	1.60734e-11	1.71912e-11	1.86e-11	3.68665e-11	1.39565e-11	1.78161e-11	1.47593e-11	4.30647e-11	1.47624e-11	1.66093e-11	1.66812e-11	1.13129e-11	1.96243e-11	1.51122e-11	1.85176e-11	2.98833e-11
17.84	1.33076e-11	1.75135e-11	2.36005e-11	1.60809e-11	1.71833e-11	1.86003e-11	3.68743e-11	1.39502e-11	1.78181e-11	1.47624e-11	4.3068e-11	1.47607e-11	1.66099e-11	1.66782e-11	1.13132e-11	1.96207e-11	1.51085e-11	1.85093e-11	2.98826e-11
17.86	1.33056e-11	1.75286e-11	2.36205e-11	1.60757e-11	1.71866e-11	1.85992e-11	3.6874e-11	1.39535e-11	1.78169e-11	1.47643e-11	4.30679e-11	1.47592e-11	1.66145e-11	1.66832e-11	1.131e-11	1.96194e-11	1.51139e-11	1.85106e-11	2.98885e-11
17.88	1.33106e-11	1.75174e-11	2.36015e-11	1.60771e-11	1.71853e-11	1.85971e-11	3.68673e-11	1.39509e-11	1.78164e-11	1.47682e-11	4.30794e-11	1.47617e-11	1.66152e-11	1.668e-11	1.13092e-11	1.96236e-11	1.5109e-11	1.85211e-11	2.98778e-11
17.9	1.33102e-11	1.75181e-11	2.36044e-11	1.60752e-11	1.71909e-11	1.8601e-11	3.68752e-11	1.39596e-11	1.78167e-11	1.47641e-11	4.30446e-11	1.47569e-11	1.66155e-11	1.668e-11	1.13107e-11	1.96188e-11	1.51092e-11	1.85206e-11	2.98994e-11
17.92	1.33093e-11	1.75209e-11	2.35978e-11	1.60757e-11	1.71799e-11	1.85971e-11	3.68695e-11	1.39597e-11	1.78134e-11	1.476e-11	4.30727e-11	1.47599e-11	1.66144e-11	1.66803e-11	1.13108e-11	1.96249e-11	1.51081e-11	1.85154e-11	2.9895e-11
17.94	1.3311e-11	1.75212e-11	2.36095e-11	1.6074e-11	1.71813e-11	1.85999e-11	3.68667e-11	1.39557e-11	1.78207e-11	1.47656e-11	4.30672e-11	1.47613e-11	1.66165e-11	1.66859e-11	1.13097e-11	1.96163e-11	1.5107e-11	1.85174e-11
17.96	1.33146e-11	1.75156e-11	2.36085e-11	1.60709e-11	1.71896e-11	1.86001e-11	3.68697e-11	1.39551e-11	1.78195e-11	1.47634e-11	4.30624e-11	1.47614e-11	1.66136e-11	1.66866e-11	1.13132e-11	1.96224e-11	1.51108e-11	1.85165e-11
17.98	1.3309e-11	1.75209e-11	2.36157e-11	1.60765e-11	1.71827e-11	1.85965e-11	3.68618e-11	1.39485e-11	1.78176e-11	1.47566e-11	4.30612e-11	1.4763e-11	1.66107e-11	1.66843e-11	1.13051e-11	1.96233e-11	1.51114e-11	1.85104e-11
18	1.33072e-11	1.75202e-11	2.35987e-11	1.60814e-11	1.71807e-11	1.85965e-11	3.68705e-11	1.395e-11	1.78149e-11	1.47629e-11	4.30634e-11	1.47551e-11	1.6618e-11	1.66822e-11	1.13124e-11	1.96258e-11	1.51081e-11	1.85004e-11
18.02	1.33079e-11	1.75223e-11	2.36089e-11	1.60785e-11	1.71892e-11	1.85874e-11	3.68662e-11	1.39445e-11	1.78155e-11	1.47617e-11	4.30728e-11	1.47641e-11	1.66076e-11	1.66842e-11	1.13108e-11	1.96231e-11	1.51127e-11	1.8512e-11
18.04	1.33094e-11	1.75213e-11	2.36054e-11	1.60837e-11	1.71913e-11	1.85908e-11	3.68697e-11	1.39493e-11	1.78215e-11	1.47651e-11	4.30695e-11	1.47581e-11	1.66152e-11	1.66778e-11	1.13128e-11	1.96226e-11	1.51079e-11	1.85002e-11
18.06	1.33109e-11	1.75235e-11	2.36049e-11	1.60778e-11	1.71865e-11	1.85916e-11	3.68752e-11	1.39475e-11	1.78131e-11	1.47641e-11	4.30862e-11	1.47564e-11	1.66189e-11	1.66814e-11	1.13131e-11	1.96233e-11	1.5113e-11	1.84926e-11
18.08	1.33089e-11	1.75165e-11	2.3595e-11	1.60736e-11	1.71908e-11	1.85866e-11	3.68687e-11	1.3955e-11	1.78182e-11	1.47571e-11	4.30668e-11	1.47488e-11	1.66171e-11	1.66833e-11	1.13098e-11	1.96223e-11	1.51065e-11	1.8496e-11
18.1	1.33124e-11	1.75231e-11	2.36029e-11	1.6078e-11	1.71849e-11	1.85894e-11	3.68795e-11	1.39541e-11	1.78204e-11	1.4764e-11	4.30473e-11	1.47539e-11	1.66188e-11	1.668e-11	1.13128e-11	1.96233e-11	1.51014e-11	1.84929e-11
18.12	1.3313e-11	1.75236e-11	2.36063e-11	1.60746e-11	1.71855e-11	1.85852e-11	3.6869e-11	1.39543e-11	1.78161e-11	1.47694e-11	4.30756e-11	1.47583e-11	1.6614e-11	1.66835e-11	1.1315e-11	1.96223e-11	1.5106e-11	1.84958e-11
18.14	1.33116e-11	1.75198e-11	2.3601e-11	1.60723e-11	1.71853e-11	1.85896e-11	3.6877e-11	1.39518e-11	1.78161e-11	1.47637e-11	4.30816e-11	1.4756e-11	1.66194e-11	1.66862e-11	1.13112e-11	1.96259e-11	1.51046e-11	1.85005e-11
18.16	1.33163e-11	1.75157e-11	2.36113e-11	1.60753e-11	1.71848e-11	1.85874e-11	3.6873e-11	1.39524e-11	1.78168e-11	1.47614e-11	4.30641e-11	1.47568e-11	1.66121e-11	1.66764e-11	1.13153e-11	1.9621e-11	1.51063e-11	1.84911e-11
18.18	1.33117e-11	1.75235e-11	2.35983e-11	1.60749e-11	1.71838e-11	1.8587e-11	3.68721e-11	1.39538e-11	1.78186e-11	1.47609e-11	4.30624e-11	1.47588e-11	1.66184e-11	1.66845e-11	1.13134e-11	1.96232e-11	1.51126e-11	1.84896e-11
18.2	1.33088e-11	1.75253e-11	2.35955e-11	1.60724e-11	1.7178e-11	1.85927e-11	3.68687e-11	1.39537e-11	1.78179e-11	1.47598e-11	4.30695e-11	1.47593e-11	1.66119e-11	1.66793e-11	1.13136e-11	1.96211e-11	1.51028e-11	1.85005e-11
18.22	1.33078e-11	1.75078e-11	2.35953e-11	1.60697e-11	1.71826e-11	1.8588e-11	3.68761e-11	1.39525e-11	1.78133e-11	1.47643e-11	4.30714e-11	1.47555e-11	1.66152e-11	1.66815e-11	1.1313e-11	1.96198e-11	1.51063e-11	1.84937e-11
18.24	1.33136e-11	1.75181e-11	2.35941e-11	1.60703e-11	1.71847e-11	1.85836e-11	3.6868e-11	1.39636e-11	1.78173e-11	1.47638e-11	4.30805e-11	1.47592e-11	1.66125e-11	1.66827e-11	1.13119e-11	1.96187e-11	1.51092e-11	1.85014e-11
18.26	1.33158e-11	1.75143e-11	2.35996e-11	1.60798e-11	1.71851e-11	1.85854e-11	3.68733e-11	1.39595e-11	1.78161e-11	1.47627e-11	4.3073e-11	1.47536e-11	1.66147e-11	1.66856e-11	1.13155e-11	1.96214e-11	1.51076e-11	1.84964e-11
18.28	1.33066e-11	1.75164e-11	2.36042e-11	1.60696e-11	1.71903e-11	1.85888e-11	3.68696e-11	1.39566e-11	1.7811e-11	1.47602e-11	4.30489e-11	1.47566e-11	1.66193e-11	1.66852e-11	1.13114e-11	1.96181e-11	1.51056e-11	1.84912e-11
18.3	1.33041e-11	1.75225e-11	2.35986e-11	1.60734e-11	1.71853e-11	1.85835e-11	3.68721e-11	1.39591e-11	1.78198e-11	1.47683e-11	4.30706e-11	1.47596e-11	1.66117e-11	1.66864e-11	1.13102e-11	1.96207e-11	1.51016e-11	1.84964e-11
18.32	1.33071e-11	1.75226e-11	2.35991e-11	1.60809e-11	1.71877e-11	1.85838e-11	3.68747e-11	1.39608e-11	1.78154e-11	1.47658e-11	4.30603e-11	1.47608e-11	1.66158e-11	1.66804e-11	1.13073e-11	1.96147e-11	1.51057e-11	1.84911e-11
18.34	1.33081e-11	1.75187e-11	2.35914e-11	1.608e-11	1.71848e-11	1.85861e-11	3.68749e-11	1.3954e-11	1.78165e-11	1.47605e-11	4.30788e-11	1.47561e-11	1.66187e-11	1.66814e-11	1.13073e-11	1.96188e-11	1.51079e-11	1.84898e-11
18.36	1.33128e-11	1.75139e-11	2.35955e-11	1.60741e-11	1.71833e-11	1.85825e-11	3.68767e-11	1.39546e-11	1.78174e-11	1.47642e-11	4.30692e-11	1.47588e-11	1.66102e-11	1.66822e-11	1.13057e-11	1.96248e-11	1.51011e-11	1.84956e-11
18.38	1.33111e-11	1.75178e-11	2.35944e-11	1.60739e-11	1.71862e-11	1.85858e-11	3.68748e-11	1.39584e-11	1.78197e-11	1.47632e-11	4.30643e-11	1.4762e-11	1.66196e-11	1.66772e-11	1.13133e-11	1.96216e-11	1.51057e-11	1.84883e-11
18.4	1.33139e-11	1.75199e-11	2.36101e-11	1.60727e-11	1.71816e-11	1.85804e-11	3.68809e-11	1.39497e-11	1.78204e-11	1.47637e-11	4.3066e-11	1.47587e-11	1.66167e-11	1.66848e-11	1.13144e-11	1.96217e-11	1.50977e-11	1.8487e-11
18.42	1.33153e-11	1.75134e-11	2.3601e-11	1.60706e-11	1.71829e-11	1.85852e-11	3.68707e-11	1.39525e-11	1.78201e-11	1.47613e-11	4.30653e-11	1.47625e-11	1.66108e-11	1.66797e-11	1.13116e-11	1.96208e-11	1.51007e-11	1.8493e-11
18.44	1.33164e-11	1.75232e-11	2.35863e-11	1.60723e-11	1.71794e-11	1.85797e-11	3.68723e-11	1.3957e-11	1.782e-11	1.47664e-11	4.30606e-11	1.47565e-11	1.66119e-11	1.66835e-11	1.13118e-11	1.96193e-11	1.51062e-11	1.84961e-11
18.46	1.33027e-11	1.7516e-11	2.36016e-11	1.60703e-11	1.71876e-11	1.85828e-11	3.68743e-11	1.39539e-11	1.78178e-11	1.47645e-11	4.30587e-11	1.47598e-11	1.66124e-11	1.6683e-11	1.13114e-11	1.96173e-11	1.5105e-11	1.84891e-11
18.48	1.33066e-11	1.75157e-11	2.36049e-11	1.6075e-11	1.71786e-11	1.85763e-11	3.68711e-11	1.39551e-11	1.7818e-11	1.47606e-11	4.3058e-11	1.47557e-11	1.66171e-11	1.66861e-11	1.13108e-11	1.96217e-11	1.51053e-11	1.84819e-11
18.5	1.33106e-11	1.75156e-11	2.36048e-11	1.60744e-11	1.71842e-11	1.85811e-11	3.68745e-11	1.39469e-11	1.78151e-11	1.47631e-11	4.30712e-11	1.47588e-11	1.66139e-11	1.66857e-11	1.13147e-11	1.96266e-11	1.5104e-11	1.84903e-11
18.52	1.33138e-11	1.75221e-11	2.3599e-11	1.60752e-11	1.71834e-11	1.85785e-11	3.68699e-11	1.39576e-11	1.78116e-11	1.47609e-11	4.30621e-11	1.47614e-11	1.66173e-11	1.66792e-11	1.13117e-11	1.9615e-11	1.51045e-11	1.84873e-11
18.54	1.33127e-11	1.75269e-11	2.3597e-11	1.60705e-11	1.71855e-11	1.85799e-11	3.68832e-11	1.39512e-11	1.78173e-11	1.47591e-11	4.30794e-11	1.47562e-11	1.66128e-11	1.6682e-11	1.13147e-11	1.96211e-11	1.50999e-11	1.84845e-11
18.56	1.33138e-11	1.75153e-11	2.36024e-11	1.60733e-11	1.718e-11	1.85777e-11	3.68775e-11	1.3953e-11	1.78195e-11	1.47645e-11	4.30484e-11	1.47562e-11	1.66143e-11	1.66825e-11	1.13059e-11	1.96196e-11	1.51013e-11	1.84806e-11
18.58	1.33022e-11	1.75248e-11	2.36026e-11	1.60739e-11	1.71887e-11	1.85759e-11	3.68752e-11	1.39495e-11	1.78173e-11	1.47656e-11	4.30715e-11	1.47558e-11	1.66053e-11	1.66838e-11	1.13085e-11	1.96269e-11	1.50997e-11	1.84792e-11
18.6	1.33043e-11	1.752e-11	2.35962e-11	1.60734e-11	1.71828e-11	1.85803e-11	3.68797e-11	1.39575e-11	1.78172e-11	1.47593e-11	4.30586e-11	1.47564e-11	1.66127e-11	1.66797e-11	1.13135e-11	1.96257e-11	1.51068e-11	1.84922e-11
18.62	1.33065e-11	1.75256e-11	2.35919e-11	1.60723e-11	1.71876e-11	1.85759e-11	3.68767e-11	1.39524e-11	1.78168e-11	1.47634e-11	4.30705e-11	1.47604e-11	1.66101e-11	1.66848e-11	1.13114e-11	1.96246e-11	1.50989e-11	1.84802e-11
18.64	1.33042e-11	1.75208e-11	2.35986e-11	1.60632e-11	1.71883e-11	1.85762e-11	3.68766e-11	1.39501e-11	1.78115e-11	1.47622e-11	4.30732e-11	1.47545e-11	1.66084e-11	1.66841e-11	1.13096e-11	1.96265e-11	1.51025e-11	1.84756e-11
18.66	1.33043e-11	1.75078e-11	2.36057e-11	1.60735e-11	1.71826e-11	1.85756e-11	3.68773e-11	1.39425e-11	1.7813e-11	1.47623e-11	4.30886e-11	1.47558e-11	1.66119e-11	1.66761e-11	1.13147e-11	1.96225e-11	1.50995e-11	1.84836e-11
18.68	1.33024e-11	1.75172e-11	2.3602e-11	1.6073e-11	1.71841e-11	1.85736e-11	3.68685e-11	1.39515e-11	1.7812e-11	1.47602e-11	4.30832e-11	1.47567e-11	1.66125e-11	1.66833e-11	1.13116e-11	1.9622e-11	1.50998e-11	1.84791e-11
18.7	1.33066e-11	1.75144e-11	2.36064e-11	1.60674e-11	1.71816e-11	1.85785e-11	3.68735e-11	1.39498e-11	1.78119e-11	1.47576e-11	4.30844e-11	1.47574e-11	1.66176e-11	1.6681e-11	1.13134e-11	1.96193e-11	1.50997e-11	1.84758e-11
18.72	1.33107e-11	1.75215e-11	2.36088e-11	1.60732e-11	1.71837e-11	1.85808e-11	3.68835e-11	1.39566e-11	1.78135e-11	1.47605e-11	4.30748e-11	1.47526e-11	1.66058e-11	1.66836e-11	1.1309e-11	1.96263e-11	1.50962e-11	1.84752e-11
18.74	1.33119e-11	1.7521e-11	2.36105e-11	1.60654e-11	1.71798e-11	1.85824e-11	3.68818e-11	1.3954e-11	1.78133e-11	1.47608e-11	4.30851e-11	1.47536e-11	1.66125e-11	1.66861e-11	1.13093e-11	1.96207e-11	1.50967e-11	1.84737e-11
18.76	1.33091e-11	1.7526e-11	2.35967e-11	1.60679e-11	1.71894e-11	1.85872e-11	3.68771e-11	1.39429e-11	1.78134e-11	1.47625e-11	4.30845e-11	1.47575e-11	1.66084e-11	1.66872e-11	1.13111e-11	1.96215e-11	1.51041e-11	1.84726e-11
18.78	1.33111e-11	1.75269e-11	2.35993e-11	1.60681e-11	1.71852e-11	1.85795e-11	3.68734e-11	1.39498e-11	1.78157e-11	1.47585e-11	4.30878e-11	1.47562e-11	1.66106e-11	1.66853e-11	1.131e-11	1.96177e-11	1.51037e-11	1.84771e-11
18.8	1.33124e-11	1.75233e-11	2.35858e-11	1.60726e-11	1.71795e-11	1.85787e-11	3.68751e-11	1.39524e-11	1.78138e-11	1.4762e-11	4.30846e-11	1.47555e-11	1.6613e-11	1.66812e-11	1.131e-11	1.96222e-11	1.51065e-11	1.84688e-11
18.82	1.33151e-11	1.75206e-11	2.3601e-11	1.60707e-11	1.71836e-11	1.85746e-11	3.68722e-11	1.39595e-11	1.78135e-11	1.47591e-11	4.30639e-11	1.4757e-11	1.66102e-11	1.66844e-11	1.13102e-11	1.96204e-11	1.5105e-11	1.84786e-11
18.84	1.33123e-11	1.75195e-11	2.36011e-11	1.60688e-11	1.71814e-11	1.85764e-11	3.68822e-11	1.39574e-11	1.78105e-11	1.4757e-11	4.30806e-11	1.47587e-11	1.66124e-11	1.66861e-11	1.13119e-11	1.96171e-11	1.51051e-11	1.84737e-11
18.86	1.33101e-11	1.75222e-11	2.35963e-11	1.6067e-11	1.71851e-11	1.85768e-11	3.68803e-11	1.39531e-11	1.78116e-11	1.47648e-11	4.30731e-11	1.47532e-11	1.66122e-11	1.66832e-11	1.13145e-11	1.96166e-11	1.51049e-11	1.84738e-11
18.88	1.33046e-11	1.752e-11	2.36056e-11	1.60689e-11	1.71783e-11	1.85715e-11	3.68801e-11	1.39534e-11	1.78097e-11	1.47608e-11	4.30799e-11	1.47487e-11	1.66129e-11	1.66844e-11	1.13134e-11	1.96187e-11	1.51091e-11	1.84709e-11
18.9	1.33178e-11	1.75208e-11	2.35952e-11	1.60716e-11	1.71784e-11	1.85667e-11	3.68772e-11	1.39481e-11	1.78113e-11	1.47641e-11	4.30697e-11	1.47529e-11	1.66182e-11	1.66821e-11	1.13149e-11	1.96223e-11	1.5103e-11	1.84722e-11
18.92	1.33134e-11	1.75274e-11	2.35937e-11	1.6068e-11	1.71763e-11	1.85714e-11	3.68762e-11	1.39466e-11	1.78122e-11	1.47571e-11	4.30799e-11	1.47579e-11	1.66121e-11	1.66889e-11	1.1313e-11	1.96183e-11	1.51022e-11	1.84788e-11
18.94	1.33099e-11	1.75244e-11	2.36077e-11	1.60708e-11	1.71793e-11	1.85678e-11	3.68811e-11	1.39553e-11	1.78158e-11	1.47607e-11	4.30626e-11	1.47544e-11	1.66111e-11	1.66892e-11	1.13109e-11	1.96208e-11	1.5101e-11	1.84717e-11
18.96	1.33121e-11	1.75276e-11	2.36048e-11	1.60718e-11	1.71772e-11	1.85715e-11	3.68787e-11	1.39568e-11	1.78137e-11	1.47697e-11	4.30819e-11	1.47553e-11	1.66117e-11	1.66872e-11	1.13133e-11	1.96246e-11	1.50997e-11	1.84628e-11
18.98	1.33153e-11	1.75218e-11	2.36034e-11	1.60654e-11	1.71777e-11	1.8575e-11	3.68827e-11	1.39626e-11	1.78175e-11	1.47644e-11	4.30753e-11	1.47549e-11	1.66133e-11	1.66818e-11	1.13111e-11	1.96217e-11	1.51081e-11	1.8472e-11
19	1.33147e-11	1.75229e-11	2.35956e-11	1.60713e-11	1.71773e-11	1.85741e-11	3.68799e-11	1.39604e-11	1.78152e-11	1.47623e-11	4.30783e-11	1.47482e-11	1.66101e-11	1.66831e-11	1.13184e-11	1.96253e-11	1.51079e-11	1.84687e-11
19.02	1.33133e-11	1.75279e-11	2.3594e-11	1.60714e-11	1.71789e-11	1.85735e-11	3.68763e-11	1.39591e-11	1.78143e-11	1.47613e-11	4.30779e-11	1.47514e-11	1.66113e-11	1.66883e-11	1.13118e-11	1.96205e-11	1.51051e-11	1.84711e-11
19.04	1.33127e-11	1.75248e-11	2.35986e-11	1.60736e-11	1.71775e-11	1.8563e-11	3.68725e-11	1.39582e-11	1.78109e-11	1.4763e-11	4.30902e-11	1.47526e-11	1.66119e-11	1.66839e-11	1.13169e-11	1.96191e-11	1.51021e-11	1.84709e-11
19.06	1.33115e-11	1.75277e-11	2.36073e-11	1.60698e-11	1.71771e-11	1.85713e-11	3.68781e-11	1.39469e-11	1.78118e-11	1.47638e-11	4.30711e-11	1.47492e-11	1.66128e-11	1.66869e-11	1.13108e-11	1.96203e-11	1.51042e-11	1.84698e-11
19.08	1.33119e-11	1.75284e-11	2.36073e-11	1.60717e-11	1.71815e-11	1.85691e-11	3.68823e-11	1.39511e-11	1.78121e-11	1.47594e-11	4.30749e-11	1.47575e-11	1.66079e-11	1.66879e-11	1.13081e-11	1.96215e-11	1.5107e-11	1.84686e-11
19.1	1.33128e-11	1.7523e-11	2.36048e-11	1.60665e-11	1.71765e-11	1.85728e-11	3.6877e-11	1.39462e-11	1.781e-11	1.47631e-11	4.30675e-11	1.47611e-11	1.6609e-11	1.66899e-11	1.13103e-11	1.96138e-11	1.51e-11	1.8477e-11
19.12	1.3314e-11	1.7523e-11	2.36029e-11	1.60762e-11	1.71726e-11	1.85687e-11	3.68799e-11	1.39448e-11	1.78121e-11	1.4763e-11	4.30808e-11	1.47581e-11	1.66099e-11	1.66884e-11	1.13108e-11	1.96212e-11	1.51032e-11	1.84693e-11
19.14	1.33164e-11	1.75277e-11	2.3608e-11	1.60691e-11	1.71748e-11	1.85726e-11	3.68818e-11	1.39491e-11	1.78098e-11	1.47584e-11	4.30672e-11	1.47561e-11	1.66141e-11	1.66844e-11	1.13107e-11	1.96222e-11	1.51057e-11	1.84683e-11
19.16	1.33218e-11	1.75255e-11	2.36051e-11	1.60687e-11	1.71717e-11	1.85773e-11	3.68769e-11	1.39502e-11	1.78097e-11	1.47613e-11	4.30833e-11	1.47582e-11	1.66092e-11	1.66912e-11	1.13091e-11	1.96151e-11	1.50986e-11	1.84618e-11
19.18	1.33088e-11	1.75315e-11	2.36157e-11	1.60652e-11	1.7181e-11	1.85713e-11	3.68869e-11	1.39451e-11	1.78115e-11	1.47601e-11	4.30883e-11	1.47558e-11	1.66101e-11	1.66899e-11	1.13129e-11	1.96195e-11	1.51023e-11	1.8467e-11
19.2	1.3319e-11	1.75359e-11	2.36078e-11	1.60725e-11	1.71745e-11	1.85703e-11	3.68776e-11	1.39463e-11	1.78111e-11	1.47658e-11	4.30939e-11	1.47572e-11	1.66102e-11	1.66814e-11	1.13086e-11	1.96153e-11	1.51092e-11	1.84633e-11
19.22	1.3315e-11	1.75332e-11	2.36032e-11	1.60706e-11	1.71764e-11	1.85717e-11	3.68841e-11	1.39453e-11	1.78142e-11	1.47595e-11	4.30789e-11	1.4751e-11	1.66114e-11	1.66839e-11	1.13101e-11	1.96203e-11	1.51089e-11	1.84683e-11
19.24	1.33177e-11	1.75425e-11	2.36035e-11	1.60668e-11	1.71725e-11	1.85735e-11	3.68799e-11	1.39519e-11	1.78135e-11	1.47615e-11	4.30812e-11	1.47558e-11	1.66077e-11	1.66849e-11	1.13083e-11	1.96144e-11	1.51035e-11	1.84668e-11
19.26	1.33193e-11	1.75407e-11	2.36078e-11	1.60738e-11	1.71761e-11	1.85741e-11	3.68804e-11	1.39478e-11	1.78133e-11	1.47566e-11	4.30906e-11	1.47548e-11	1.66077e-11	1.66856e-11	1.13032e-11	1.96252e-11	1.50965e-11	1.84597e-11
19.28	1.3311e-11	1.75382e-11	2.36113e-11	1.60667e-11	1.71826e-11	1.85716e-11	3.68761e-11	1.39505e-11	1.78109e-11	1.47616e-11	4.30901e-11	1.47587e-11	1.66104e-11	1.66869e-11	1.13122e-11	1.96151e-11	1.51076e-11	1.84606e-11
19.3	1.33079e-11	1.75412e-11	2.36063e-11	1.60716e-11	1.71747e-11	1.85673e-11	3.68833e-11	1.39509e-11	1.78115e-11	1.47621e-11	4.30751e-11	1.47563e-11	1.66126e-11	1.66829e-11	1.13121e-11	1.9617e-11	1.51037e-11	1.84602e-11
19.32	1.33081e-11	1.75371e-11	2.36008e-11	1.60725e-11	1.71827e-11	1.85673e-11	3.68794e-11	1.39561e-11	1.78108e-11	1.47591e-11	4.30768e-11	1.47557e-11	1.66089e-11	1.66865e-11	1.13139e-11	1.96162e-11	1.51031e-11	1.84451e-11
19.34	1.33023e-11	1.75408e-11	2.36031e-11	1.60712e-11	1.71731e-11	1.85665e-11	3.68828e-11	1.39529e-11	1.78122e-11	1.47628e-11	4.30885e-11	1.47503e-11	1.66048e-11	1.66906e-11	1.13088e-11	1.96201e-11	1.51009e-11	1.84615e-11
19.36	1.33103e-11	1.75468e-11	2.36124e-11	1.60694e-11	1.71775e-11	1.85689e-11	3.68866e-11	1.39557e-11	1.7814e-11	1.47609e-11	4.30781e-11	1.47583e-11	1.66107e-11	1.6682e-11	1.13121e-11	1.96141e-11	1.51009e-11	1.84513e-11
19.38	1.33123e-11	1.75478e-11	2.36065e-11	1.60677e-11	1.71735e-11	1.8571e-11	3.68778e-11	1.39607e-11	1.78127e-11	1.47614e-11	4.30887e-11	1.47556e-11	1.66059e-11	1.66879e-11	1.13117e-11	1.96129e-11	1.5096e-11	1.8455e-11
19.4	1.33092e-11	1.7558e-11	2.36185e-11	1.60725e-11	1.71802e-11	1.85672e-11	3.68798e-11	1.39587e-11	1.78106e-11	1.47617e-11	4.30671e-11	1.47624e-11	1.66158e-11	1.66857e-11	1.13043e-11	1.96188e-11	1.50975e-11	1.84562e-11
19.42	1.33109e-11	1.75548e-11	2.36013e-11	1.60739e-11	1.71764e-11	1.85676e-11	3.68737e-11	1.39608e-11	1.78089e-11	1.47644e-11	4.30888e-11	1.47556e-11	1.66094e-11	1.66916e-11	1.1314e-11	1.96141e-11	1.50962e-11	1.84539e-11
19.44	1.33039e-11	1.75534e-11	2.36078e-11	1.60688e-11	1.71784e-11	1.85622e-11	3.68819e-11	1.3956e-11	1.78148e-11	1.47607e-11	4.30766e-11	1.47533e-11	1.66145e-11	1.66828e-11	1.13151e-11	1.9615e-11	1.50942e-11	1.84475e-11
19.46	1.33091e-11	1.75527e-11	2.3604e-11	1.60719e-11	1.71753e-11	1.85699e-11	3.68824e-11	1.39631e-11	1.78135e-11	1.47614e-11	4.31016e-11	1.47484e-11	1.66102e-11	1.66855e-11	1.13167e-11	1.96124e-11	1.50962e-11	1.84466e-11
19.48	1.33108e-11	1.7558e-11	2.36122e-11	1.60718e-11	1.7175e-11	1.85655e-11	3.68812e-11	1.39582e-11	1.78162e-11	1.47598e-11	4.30721e-11	1.47523e-11	1.66086e-11	1.66868e-11	1.13082e-11	1.96092e-11	1.50952e-11	1.84544e-11
19.5	1.33098e-11	1.75509e-11	2.36027e-11	1.60656e-11	1.71741e-11	1.85689e-11	3.68836e-11	1.39607e-11	1.78113e-11	1.47643e-11	4.3078e-11	1.47525e-11	1.66134e-11	1.66836e-11	1.13124e-11	1.96158e-11	1.50991e-11	1.84466e-11
19.52	1.3309e-11	1.75534e-11	2.36124e-11	1.60653e-11	1.71754e-11	1.85682e-11	3.6878e-11	1.39633e-11	1.78172e-11	1.47657e-11	4.30504e-11	1.47549e-11	1.66136e-11	1.66856e-11	1.13164e-11	1.96122e-11	1.5093e-11	1.84409e-11
19.54	1.33074e-11	1.75507e-11	2.36163e-11	1.60614e-11	1.71781e-11	1.85683e-11	3.68715e-11	1.39585e-11	1.78103e-11	1.47599e-11	4.30613e-11	1.47544e-11	1.6608e-11	1.66871e-11	1.13107e-11	1.96118e-11	1.50923e-11	1.84424e-11
19.56	1.33102e-11	1.75516e-11	2.36164e-11	1.60694e-11	1.71758e-11	1.85695e-11	3.68774e-11	1.39546e-11	1.78094e-11	1.47607e-11	4.30803e-11	1.47572e-11	1.66091e-11	1.66892e-11	1.13132e-11	1.96123e-11	1.50969e-11	1.8442e-11
19.58	1.33108e-11	1.75474e-11	2.36084e-11	1.60682e-11	1.71794e-11	1.85724e-11	3.68766e-11	1.39548e-11	1.78149e-11	1.4761e-11	4.3097e-11	1.47513e-11	1.66116e-11	1.66865e-11	1.13112e-11	1.96115e-11	1.50928e-11	1.84582e-11
19.6	1.33073e-11	1.75499e-11	2.36072e-11	1.60649e-11	1.71746e-11	1.85633e-11	3.68719e-11	1.39598e-11	1.78112e-11	1.47596e-11	4.30703e-11	1.47539e-11	1.66107e-11	1.66807e-11	1.1311e-11	1.96192e-11	1.50868e-11	1.84551e-11
19.62	1.33126e-11	1.75528e-11	2.36237e-11	1.60651e-11	1.71751e-11	1.85733e-11	3.68612e-11	1.39554e-11	1.78108e-11	1.47592e-11	4.3069e-11	1.47495e-11	1.66089e-11	1.66869e-11	1.13134e-11	1.96136e-11	1.50879e-11	1.845e-11
19.64	1.33047e-11	1.75534e-11	2.36264e-11	1.60674e-11	1.71798e-11	1.8577e-11	3.68691e-11	1.39614e-11	1.78102e-11	1.47627e-11	4.30783e-11	1.47538e-11	1.66071e-11	1.66893e-11	1.1307e-11	1.96185e-11	1.50913e-11	1.84343e-11
19.66	1.33056e-11	1.75521e-11	2.36151e-11	1.60683e-11	1.71787e-11	1.85788e-11	3.68747e-11	1.39574e-11	1.78123e-11	1.47635e-11	4.30772e-11	1.47526e-11	1.66055e-11	1.66851e-11	1.13108e-11	1.96121e-11	1.50895e-11	1.84267e-11
19.68	1.33064e-11	1.75579e-11	2.36201e-11	1.60711e-11	1.71765e-11	1.85784e-11	3.68728e-11	1.39522e-11	1.78118e-11	1.47583e-11	4.30855e-11	1.47503e-11	1.66045e-11	1.66839e-11	1.13113e-11	1.96179e-11	1.51025e-11	1.84382e-11
19.7	1.33147e-11	1.75469e-11	2.36154e-11	1.6065e-11	1.71711e-11	1.85741e-11	3.68691e-11	1.39636e-11	1.78153e-11	1.47595e-11	4.3092e-11	1.47506e-11	1.66085e-11	1.66833e-11	1.13165e-11	1.96109e-11	1.51038e-11	1.84421e-11
19.72	1.33049e-11	1.75459e-11	2.3617e-11	1.60634e-11	1.71745e-11	1.85753e-11	3.68724e-11	1.39563e-11	1.78159e-11	1.47625e-11	4.30733e-11	1.47542e-11	1.66074e-11	1.66804e-11	1.13143e-11	1.96127e-11	1.51033e-11	1.84396e-11
19.74	1.33071e-11	1.75498e-11	2.36255e-11	1.60696e-11	1.71744e-11	1.85717e-11	3.68677e-11	1.39625e-11	1.78149e-11	1.47613e-11	4.30716e-11	1.475e-11	1.66091e-11	1.66815e-11	1.13146e-11	1.96082e-11	1.51053e-11	1.84385e-11
19.76	1.3307e-11	1.75534e-11	2.36196e-11	1.60605e-11	1.71738e-11	1.85751e-11	3.68675e-11	1.39546e-11	1.78118e-11	1.47613e-11	4.30751e-11	1.47509e-11	1.6609e-11	1.66799e-11	1.13167e-11	1.96126e-11	1.51004e-11	1.84252e-11
19.78	1.33102e-11	1.75566e-11	2.36044e-11	1.60651e-11	1.71746e-11	1.85736e-11	3.68694e-11	1.39582e-11	1.78087e-11	1.47584e-11	4.30746e-11	1.47503e-11	1.66111e-11	1.66837e-11	1.13141e-11	1.96107e-11	1.51056e-11	1.84397e-11
19.8	1.33028e-11	1.75545e-11	2.36088e-11	1.60689e-11	1.71759e-11	1.85766e-11	3.68711e-11	1.39542e-11	1.78128e-11	1.47556e-11	4.3084e-11	1.47506e-11	1.66102e-11	1.66766e-11	1.13089e-11	1.96117e-11	1.50992e-11	1.84361e-11
19.82	1.33101e-11	1.75556e-11	2.36142e-11	1.60651e-11	1.71731e-11	1.85773e-11	3.68693e-11	1.39538e-11	1.7818e-11	1.47608e-11	4.30841e-11	1.4749e-11	1.66126e-11	1.66851e-11	1.1312e-11	1.96179e-11	1.5096e-11	1.84386e-11
19.84	1.3311e-11	1.75501e-11	2.36081e-11	1.60686e-11	1.71679e-11	1.85861e-11	3.68657e-11	1.39527e-11	1.78133e-11	1.47575e-11	4.30827e-11	1.47467e-11	1.66078e-11	1.66865e-11	1.1315e-11	1.96135e-11	1.5094e-11	1.84454e-11
19.86	1.33123e-11	1.75546e-11	2.36016e-11	1.60709e-11	1.71754e-11	1.85902e-11	3.68744e-11	1.39532e-11	1.78131e-11	1.47561e-11	4.30785e-11	1.47505e-11	1.66069e-11	1.66813e-11	1.1309e-11	1.96159e-11	1.50994e-11	1.84359e-11
19.88	1.33169e-11	1.75546e-11	2.3597e-11	1.60685e-11	1.71742e-11	1.85904e-11	3.6869e-11	1.39572e-11	1.78126e-11	1.47614e-11	4.30912e-11	1.47484e-11	1.66081e-11	1.66888e-11	1.13152e-11	1.96077e-11	1.50997e-11	1.84346e-11
19.9	1.33116e-11	1.7556e-11	2.3602e-11	1.60704e-11	1.71805e-11	1.85865e-11	3.68633e-11	1.39627e-11	1.7812e-11	1.47576e-11	4.30877e-11	1.475e-11	1.66066e-11	1.66808e-11	1.1312e-11	1.96114e-11	1.50958e-11	1.84338e-11
19.92	1.33132e-11	1.75587e-11	2.36137e-11	1.60637e-11	1.71784e-11	1.85839e-11	3.68713e-11	1.39543e-11	1.78126e-11	1.47628e-11	4.30901e-11	1.4749e-11	1.66045e-11	1.66801e-11	1.13091e-11	1.96036e-11	1.5096e-11	1.84382e-11
19.94	1.33106e-11	1.75528e-11	2.36009e-11	1.60683e-11	1.71703e-11	1.85872e-11	3.68706e-11	1.39534e-11	1.78122e-11	1.47666e-11	4.30825e-11	1.4741e-11	1.66074e-11	1.66808e-11	1.13098e-11	1.9609e-11	1.50961e-11	1.84268e-11
19.96	1.33144e-11	1.75528e-11	2.36143e-11	1.60715e-11	1.7164e-11	1.85897e-11	3.68689e-11	1.39506e-11	1.78109e-11	1.47634e-11	4.30715e-11	1.47517e-11	1.66104e-11	1.66829e-11	1.13066e-11	1.96091e-11	1.50946e-11	1.84345e-11
19.98	1.33039e-11	1.75457e-11	2.36015e-11	1.60692e-11	1.71756e-11	1.85852e-11	3.68747e-11	1.39538e-11	1.78092e-11	1.47618e-11	4.30659e-11	1.47504e-11	1.66066e-11	1.66867e-11	1.13093e-11	1.96076e-11	1.50918e-11	1.84289e-11
20	1.331e-11	1.75469e-11	2.36061e-11	1.60683e-11	1.71756e-11	1.85806e-11	3.6872e-11	1.39486e-11	1.78163e-11	1.47635e-11	4.30806e-11	1.47486e-11	1.66108e-11	1.66855e-11	1.13112e-11	1.961e-11	1.50922e-11	1.84354e-11
20.02	1.33169e-11	1.75477e-11	2.35947e-11	1.60696e-11	1.7168e-11	1.85797e-11	3.68705e-11	1.39571e-11	1.78156e-11	1.4765e-11	4.3073e-11	1.47497e-11	1.66084e-11	1.66877e-11	1.13111e-11	1.96072e-11	1.50979e-11	1.84405e-11
20.04	1.3309e-11	1.75522e-11	2.36046e-11	1.6067e-11	1.71776e-11	1.858e-11	3.6876e-11	1.39579e-11	1.78111e-11	1.47611e-11	4.3067e-11	1.47434e-11	1.66087e-11	1.66878e-11	1.1311e-11	1.96125e-11	1.50971e-11	1.84397e-11
20.06	1.33131e-11	1.75425e-11	2.36182e-11	1.60672e-11	1.7176e-11	1.85861e-11	3.68792e-11	1.39567e-11	1.78149e-11	1.47615e-11	4.30733e-11	1.47459e-11	1.66125e-11	1.66816e-11	1.13132e-11	1.96135e-11	1.50877e-11	1.8445e-11
20.08	1.33095e-11	1.75527e-11	2.36194e-11	1.60646e-11	1.71773e-11	1.85877e-11	3.68732e-11	1.39549e-11	1.78153e-11	1.476e-11	4.30696e-11	1.47436e-11	1.66057e-11	1.66849e-11	1.13067e-11	1.96104e-11	1.51007e-11	1.8437e-11
20.1	1.33132e-11	1.75443e-11	2.36231e-11	1.60649e-11	1.71735e-11	1.85834e-11	3.68801e-11	1.39523e-11	1.78115e-11	1.47566e-11	4.3071e-11	1.4749e-11	1.66077e-11	1.6684e-11	1.131e-11	1.96115e-11	1.51019e-11	1.84422e-11
20.12	1.33146e-11	1.75475e-11	2.36171e-11	1.60642e-11	1.71721e-11	1.85845e-11	3.68814e-11	1.39516e-11	1.7815e-11	1.47615e-11	4.30654e-11	1.47515e-11	1.66109e-11	1.66865e-11	1.13053e-11	1.96083e-11	1.50947e-11	1.8441e-11
20.14	1.33201e-11	1.75424e-11	2.36131e-11	1.60623e-11	1.71716e-11	1.85864e-11	3.68827e-11	1.39553e-11	1.78099e-11	1.47589e-11	4.30682e-11	1.4744e-11	1.66045e-11	1.66835e-11	1.13056e-11	1.96027e-11	1.50969e-11	1.8444e-11
20.16	1.33141e-11	1.75377e-11	2.36091e-11	1.60692e-11	1.71765e-11	1.85851e-11	3.68825e-11	1.39518e-11	1.7816e-11	1.4762e-11	4.30887e-11	1.47504e-11	1.65993e-11	1.66918e-11	1.13069e-11	1.96062e-11	1.5098e-11	1.84386e-11
20.18	1.33179e-11	1.7541e-11	2.36161e-11	1.60682e-11	1.71742e-11	1.85815e-11	3.68787e-11	1.39511e-11	1.78099e-11	1.47647e-11	4.30589e-11	1.4748e-11	1.66038e-11	1.66913e-11	1.13117e-11	1.96096e-11	1.50997e-11	1.84337e-11
20.2	1.33108e-11	1.75371e-11	2.36097e-11	1.60701e-11	1.71757e-11	1.85871e-11	3.6874e-11	1.39512e-11	1.78128e-11	1.47615e-11	4.30641e-11	1.47474e-11	1.66091e-11	1.66919e-11	1.1316e-11	1.96105e-11	1.5096e-11	1.84345e-11
20.22	1.33167e-11	1.75413e-11	2.36178e-11	1.60682e-11	1.71741e-11	1.85895e-11	3.68749e-11	1.39515e-11	1.78171e-11	1.47603e-11	4.30737e-11	1.4748e-11	1.6603e-11	1.66877e-11	1.13121e-11	1.96015e-11	1.50973e-11	1.84408e-11
20.24	1.33127e-11	1.75379e-11	2.36286e-11	1.60685e-11	1.71729e-11	1.8586e-11	3.6884e-11	1.39508e-11	1.78176e-11	1.47567e-11	4.30855e-11	1.47464e-11	1.66061e-11	1.66852e-11	1.1306e-11	1.96043e-11	1.50987e-11	1.84362e-11
20.26	1.33143e-11	1.75497e-11	2.36095e-11	1.60618e-11	1.71744e-11	1.85862e-11	3.68779e-11	1.39608e-11	1.78123e-11	1.47568e-11	4.3073e-11	1.47436e-11	1.66099e-11	1.66875e-11	1.13054e-11	1.9603e-11	1.50896e-11	1.84422e-11
20.28	1.33066e-11	1.75456e-11	2.36056e-11	1.60655e-11	1.71693e-11	1.85761e-11	3.68819e-11	1.39512e-11	1.78144e-11	1.47614e-11	4.30645e-11	1.47463e-11	1.6612e-11	1.66895e-11	1.13109e-11	1.95981e-11	1.50984e-11	1.8443e-11
20.3	1.33147e-11	1.7546e-11	2.36088e-11	1.60692e-11	1.7172e-11	1.85826e-11	3.68767e-11	1.39498e-11	1.78111e-11	1.47615e-11	4.3082e-11	1.47444e-11	1.66026e-11	1.66882e-11	1.131e-11	1.95992e-11	1.50963e-11	1.84513e-11
20.32	1.33173e-11	1.75479e-11	2.36206e-11	1.60653e-11	1.71738e-11	1.8587e-11	3.68773e-11	1.39508e-11	1.78139e-11	1.4757e-11	4.3079e-11	1.47461e-11	1.66019e-11	1.66878e-11	1.13113e-11	1.96008e-11	1.5095e-11	1.84402e-11
20.34	1.33123e-11	1.75413e-11	2.36132e-11	1.60621e-11	1.71745e-11	1.85806e-11	3.68777e-11	1.39487e-11	1.78112e-11	1.47619e-11	4.30577e-11	1.47492e-11	1.66071e-11	1.66913e-11	1.13039e-11	1.95923e-11	1.50925e-11	1.84412e-11
20.36	1.33162e-11	1.75418e-11	2.36137e-11	1.60645e-11	1.71745e-11	1.85814e-11	3.68801e-11	1.39558e-11	1.78095e-11	1.47647e-11	4.30808e-11	1.47464e-11	1.66092e-11	1.66932e-11	1.13142e-11	1.959e-11	1.50976e-11	1.84433e-11
20.38	1.33104e-11	1.75341e-11	2.36187e-11	1.60704e-11	1.71673e-11	1.85793e-11	3.6883e-11	1.39545e-11	1.78105e-11	1.47666e-11	4.30734e-11	1.47447e-11	1.66072e-11	1.66817e-11	1.1308e-11	1.95958e-11	1.50934e-11	1.84399e-11
20.4	1.33137e-11	1.7546e-11	2.36255e-11	1.60643e-11	1.71748e-11	1.85817e-11	3.68757e-11	1.39479e-11	1.78136e-11	1.47575e-11	4.30604e-11	1.47456e-11	1.66072e-11	1.66818e-11	1.13058e-11	1.95969e-11	1.50949e-11	1.84347e-11
20.42	1.33133e-11	1.75431e-11	2.36161e-11	1.60645e-11	1.71736e-11	1.85868e-11	3.68775e-11	1.39631e-11	1.78111e-11	1.47637e-11	4.30764e-11	1.4741e-11	1.66062e-11	1.66884e-11	1.13122e-11	1.9598e-11	1.50957e-11	1.84318e-11
20.44	1.33138e-11	1.75451e-11	2.36228e-11	1.607e-11	1.71722e-11	1.85831e-11	3.68775e-11	1.39592e-11	1.78094e-11	1.47588e-11	4.30811e-11	1.47474e-11	1.66032e-11	1.66911e-11	1.13095e-11	1.95964e-11	1.50936e-11	1.8432e-11
20.46	1.33147e-11	1.75461e-11	2.36191e-11	1.60649e-11	1.71733e-11	1.85813e-11	3.68777e-11	1.39571e-11	1.78108e-11	1.47588e-11	4.30785e-11	1.47459e-11	1.66032e-11	1.66855e-11	1.13099e-11	1.95905e-11	1.50964e-11	1.84382e-11
20.48	1.33193e-11	1.7536e-11	2.36112e-11	1.60675e-11	1.71709e-11	1.85796e-11	3.68773e-11	1.39524e-11	1.78107e-11	1.47635e-11	4.30759e-11	1.47439e-11	1.66053e-11	1.66915e-11	1.13082e-11	1.96051e-11	1.50895e-11	1.84304e-11
20.5	1.33179e-11	1.75373e-11	2.36228e-11	1.60617e-11	1.71746e-11	1.85843e-11	3.68736e-11	1.39598e-11	1.78135e-11	1.47615e-11	4.30542e-11	1.47437e-11	1.66112e-11	1.66877e-11	1.13102e-11	1.95968e-11	1.50965e-11	1.84344e-11
20.52	1.33177e-11	1.75364e-11	2.3603e-11	1.60694e-11	1.71746e-11	1.85824e-11	3.68775e-11	1.39534e-11	1.78143e-11	1.4766e-11	4.30566e-11	1.47467e-11	1.66125e-11	1.66888e-11	1.13126e-11	1.9594e-11	1.50875e-11	1.84337e-11
20.54	1.33164e-11	1.7535e-11	2.3618e-11	1.60662e-11	1.71764e-11	1.8579e-11	3.68769e-11	1.39592e-11	1.78123e-11	1.47632e-11	4.30719e-11	1.47503e-11	1.66104e-11	1.6693e-11	1.13091e-11	1.96012e-11	1.50896e-11	1.84314e-11
20.56	1.33205e-11	1.75421e-11	2.36129e-11	1.60635e-11	1.71777e-11	1.85808e-11	3.6879e-11	1.3952e-11	1.781e-11	1.47625e-11	4.30743e-11	1.47456e-11	1.66039e-11	1.66877e-11	1.1319e-11	1.95919e-11	1.50918e-11	1.84296e-11
20.58	1.33192e-11	1.75386e-11	2.36175e-11	1.60687e-11	1.71799e-11	1.858e-11	3.68829e-11	1.39487e-11	1.78113e-11	1.47658e-11	4.30615e-11	1.47491e-11	1.6601e-11	1.66851e-11	1.13075e-11	1.95952e-11	1.50905e-11	1.8425e-11
20.6	1.33155e-11	1.75404e-11	2.36137e-11	1.60654e-11	1.71685e-11	1.85791e-11	3.68808e-11	1.39467e-11	1.78079e-11	1.47676e-11	4.30705e-11	1.47445e-11	1.65989e-11	1.66895e-11	1.1312e-11	1.95881e-11	1.50956e-11	1.84338e-11
20.62	1.33062e-11	1.75381e-11	2.36128e-11	1.606e-11	1.71759e-11	1.85745e-11	3.68785e-11	1.39507e-11	1.78123e-11	1.47597e-11	4.30758e-11	1.47471e-11	1.66022e-11	1.66885e-11	1.1308e-11	1.95938e-11	1.50958e-11	1.84285e-11
20.64	1.33088e-11	1.75422e-11	2.36115e-11	1.60659e-11	1.7175e-11	1.85737e-11	3.6874e-11	1.39543e-11	1.78102e-11	1.47653e-11	4.30679e-11	1.47449e-11	1.66031e-11	1.66894e-11	1.1312e-11	1.95928e-11	1.509e-11	1.84382e-11
20.66	1.33105e-11	1.75327e-11	2.36108e-11	1.60604e-11	1.71759e-11	1.85716e-11	3.68734e-11	1.39554e-11	1.78127e-11	1.47635e-11	4.30547e-11	1.47477e-11	1.66012e-11	1.66921e-11	1.13123e-11	1.95882e-11	1.50957e-11	1.84388e-11
20.68	1.33135e-11	1.7532e-11	2.36148e-11	1.60649e-11	1.71688e-11	1.8577e-11	3.68702e-11	1.39601e-11	1.78133e-11	1.47621e-11	4.30734e-11	1.47457e-11	1.66064e-11	1.66896e-11	1.13108e-11	1.95903e-11	1.50986e-11	1.84295e-11
20.7	1.33137e-11	1.75275e-11	2.36152e-11	1.60639e-11	1.71697e-11	1.85796e-11	3.68731e-11	1.39535e-11	1.78092e-11	1.47624e-11	4.3074e-11	1.47442e-11	1.66048e-11	1.66825e-11	1.13079e-11	1.95903e-11	1.50995e-11	1.84311e-11
20.72	1.33135e-11	1.75337e-11	2.3624e-11	1.60659e-11	1.71757e-11	1.85818e-11	3.68705e-11	1.39533e-11	1.78152e-11	1.47613e-11	4.30696e-11	1.47512e-11	1.66052e-11	1.6684e-11	1.13146e-11	1.95906e-11	1.5101e-11	1.84309e-11
20.74	1.33084e-11	1.75385e-11	2.3615e-11	1.60632e-11	1.71707e-11	1.85807e-11	3.68698e-11	1.39593e-11	1.78094e-11	1.47615e-11	4.3068e-11	1.47482e-11	1.66031e-11	1.66866e-11	1.13161e-11	1.95895e-11	1.51015e-11	1.84153e-11
20.76	1.33119e-11	1.75322e-11	2.36075e-11	1.60571e-11	1.71707e-11	1.85826e-11	3.6878e-11	1.39525e-11	1.78116e-11	1.47616e-11	4.30842e-11	1.47444e-11	1.66e-11	1.66843e-11	1.13168e-11	1.95886e-11	1.50966e-11	1.84237e-11
20.78	1.33097e-11	1.75429e-11	2.36127e-11	1.60645e-11	1.7174e-11	1.85813e-11	3.68704e-11	1.39528e-11	1.78108e-11	1.4763e-11	4.30672e-11	1.47402e-11	1.66025e-11	1.66912e-11	1.13116e-11	1.95953e-11	1.50942e-11	1.84082e-11
20.8	1.33097e-11	1.75423e-11	2.36143e-11	1.60634e-11	1.7172e-11	1.85748e-11	3.68651e-11	1.39556e-11	1.78056e-11	1.47639e-11	4.30937e-11	1.47428e-11	1.65972e-11	1.66886e-11	1.13097e-11	1.95862e-11	1.50944e-11	1.84147e-11
20.82	1.33079e-11	1.75377e-11	2.36086e-11	1.6066e-11	1.71661e-11	1.85832e-11	3.68717e-11	1.39515e-11	1.78113e-11	1.4761e-11	4.30778e-11	1.47473e-11	1.65973e-11	1.66863e-11	1.13104e-11	1.95917e-11	1.50933e-11	1.8419e-11
20.84	1.33092e-11	1.75357e-11	2.36148e-11	1.60653e-11	1.71693e-11	1.85796e-11	3.68726e-11	1.39565e-11	1.78072e-11	1.47637e-11	4.30721e-11	1.47382e-11	1.6605e-11	1.66902e-11	1.13098e-11	1.959e-11	1.50984e-11	1.84132e-11
20.86	1.33047e-11	1.75371e-11	2.36216e-11	1.60649e-11	1.71717e-11	1.85764e-11	3.68681e-11	1.39552e-11	1.78126e-11	1.47616e-11	4.30821e-11	1.47439e-11	1.66041e-11	1.66818e-11	1.13073e-11	1.95899e-11	1.50931e-11	1.84189e-11
20.88	1.33095e-11	1.75301e-11	2.362e-11	1.60659e-11	1.71685e-11	1.8578e-11	3.68663e-11	1.39541e-11	1.78112e-11	1.4759e-11	4.30696e-11	1.47436e-11	1.65985e-11	1.66831e-11	1.1309e-11	1.95894e-11	1.5092e-11	1.84159e-11
20.9	1.33127e-11	1.75389e-11	2.36198e-11	1.60614e-11	1.71734e-11	1.85788e-11	3.68689e-11	1.39504e-11	1.78101e-11	1.47646e-11	4.30769e-11	1.47482e-11	1.66019e-11	1.66879e-11	1.13082e-11	1.95908e-11	1.5091e-11	1.84113e-11
20.92	1.33116e-11	1.75344e-11	2.36109e-11	1.60624e-11	1.71677e-11	1.85803e-11	3.68745e-11	1.39543e-11	1.78167e-11	1.47653e-11	4.30722e-11	1.47432e-11	1.65982e-11	1.66866e-11	1.1306e-11	1.95941e-11	1.50953e-11	1.84199e-11
20.94	1.33093e-11	1.75393e-11	2.36146e-11	1.60609e-11	1.71794e-11	1.85766e-11	3.68677e-11	1.39566e-11	1.78169e-11	1.47605e-11	4.30553e-11	1.4743e-11	1.65982e-11	1.66896e-11	1.13122e-11	1.9588e-11	1.50945e-11	1.84262e-11
20.96	1.33098e-11	1.75399e-11	2.36133e-11	1.60619e-11	1.71738e-11	1.85795e-11	3.68647e-11	1.39523e-11	1.78111e-11	1.47637e-11	4.30728e-11	1.47435e-11	1.66028e-11	1.66882e-11	1.131e-11	1.95836e-11	1.50939e-11	1.84323e-11
20.98	1.33111e-11	1.75362e-11	2.36177e-11	1.60607e-11	1.71663e-11	1.85745e-11	3.68755e-11	1.3955e-11	1.78116e-11	1.47573e-11	4.30688e-11	1.47397e-11	1.65939e-11	1.66895e-11	1.13076e-11	1.95873e-11	1.50962e-11	1.84302e-11
21	1.33062e-11	1.75343e-11	2.36153e-11	1.60622e-11	1.71719e-11	1.85782e-11	3.68663e-11	1.39496e-11	1.781e-11	1.47617e-11	4.30754e-11	1.47471e-11	1.65991e-11	1.66826e-11	1.13141e-11	1.95902e-11	1.50953e-11	1.84313e-11
21.02	1.33056e-11	1.75289e-11	2.36106e-11	1.60639e-11	1.71706e-11	1.8573e-11	3.68705e-11	1.39525e-11	1.78174e-11	1.4759e-11	4.30755e-11	1.47413e-11	1.66017e-11	1.66853e-11	1.13078e-11	1.95869e-11	1.50994e-11	1.84278e-11
21.04	1.33074e-11	1.75322e-11	2.36115e-11	1.60631e-11	1.71746e-11	1.85721e-11	3.68712e-11	1.39467e-11	1.78108e-11	1.47594e-11	4.30632e-11	1.47436e-11	1.65969e-11	1.66862e-11	1.13119e-11	1.95886e-11	1.51e-11	1.84208e-11
21.06	1.33147e-11	1.75296e-11	2.36252e-11	1.60578e-11	1.7168e-11	1.85744e-11	3.68708e-11	1.39428e-11	1.78167e-11	1.4765e-11	4.30784e-11	1.47455e-11	1.65995e-11	1.66897e-11	1.13096e-11	1.95865e-11	1.50956e-11	1.8422e-11
21.08	1.33101e-11	1.75334e-11	2.36156e-11	1.60606e-11	1.7175e-11	1.85669e-11	3.68668e-11	1.39478e-11	1.78156e-11	1.47633e-11	4.30697e-11	1.47472e-11	1.66053e-11	1.66817e-11	1.13145e-11	1.95843e-11	1.5094e-11	1.8425e-11
21.1	1.3314e-11	1.75359e-11	2.36278e-11	1.60593e-11	1.71735e-11	1.85735e-11	3.68616e-11	1.39397e-11	1.78122e-11	1.47575e-11	4.30685e-11	1.47458e-11	1.66077e-11	1.66863e-11	1.13113e-11	1.95823e-11	1.50936e-11	1.8421e-11
21.12	1.33128e-11	1.75378e-11	2.36183e-11	1.60622e-11	1.71778e-11	1.85701e-11	3.68628e-11	1.39472e-11	1.78184e-11	1.47649e-11	4.30816e-11	1.47472e-11	1.65973e-11	1.66869e-11	1.13079e-11	1.95848e-11	1.50919e-11	1.84177e-11
21.14	1.33086e-11	1.75368e-11	2.36128e-11	1.60591e-11	1.7174e-11	1.85726e-11	3.68657e-11	1.39531e-11	1.78122e-11	1.47636e-11	4.30698e-11	1.47446e-11	1.66006e-11	1.66829e-11	1.13067e-11	1.95818e-11	1.5088e-11	1.84222e-11
21.16	1.33115e-11	1.75359e-11	2.36229e-11	1.60618e-11	1.71697e-11	1.85747e-11	3.68678e-11	1.39522e-11	1.78141e-11	1.47652e-11	4.30828e-11	1.47403e-11	1.65966e-11	1.66859e-11	1.13136e-11	1.95822e-11	1.50895e-11	1.84216e-11
21.18	1.3316e-11	1.75244e-11	2.36172e-11	1.60595e-11	1.71723e-11	1.85748e-11	3.68624e-11	1.39561e-11	1.78119e-11	1.47579e-11	4.30746e-11	1.47442e-11	1.65986e-11	1.66873e-11	1.13085e-11	1.95802e-11	1.50909e-11	1.84255e-11
21.2	1.33153e-11	1.75345e-11	2.36169e-11	1.60591e-11	1.7166e-11	1.85713e-11	3.68672e-11	1.39568e-11	1.78145e-11	1.47614e-11	4.30666e-11	1.47466e-11	1.66002e-11	1.66884e-11	1.1312e-11	1.95825e-11	1.50946e-11	1.84161e-11
21.22	1.33127e-11	1.75297e-11	2.36099e-11	1.60592e-11	1.71752e-11	1.85664e-11	3.68673e-11	1.39489e-11	1.78142e-11	1.47584e-11	4.30633e-11	1.47415e-11	1.65991e-11	1.66867e-11	1.13145e-11	1.9579e-11	1.50895e-11	1.84128e-11
21.24	1.33134e-11	1.75254e-11	2.36048e-11	1.60596e-11	1.71729e-11	1.85652e-11	3.68601e-11	1.39444e-11	1.78143e-11	1.47585e-11	4.30629e-11	1.47437e-11	1.65916e-11	1.66861e-11	1.13089e-11	1.95813e-11	1.50927e-11	1.84168e-11
21.26	1.33092e-11	1.75277e-11	2.36017e-11	1.60615e-11	1.7177e-11	1.85681e-11	3.68625e-11	1.39539e-11	1.78126e-11	1.47593e-11	4.3071e-11	1.47377e-11	1.65997e-11	1.66884e-11	1.13097e-11	1.95755e-11	1.50916e-11	1.8413e-11
21.28	1.3312e-11	1.75326e-11	2.36122e-11	1.60577e-11	1.71737e-11	1.85676e-11	3.68544e-11	1.39521e-11	1.78126e-11	1.47617e-11	4.30657e-11	1.47412e-11	1.66e-11	1.66859e-11	1.1311e-11	1.9575e-11	1.50947e-11	1.84222e-11
21.3	1.33091e-11	1.75307e-11	2.36146e-11	1.60608e-11	1.71699e-11	1.85681e-11	3.68637e-11	1.39486e-11	1.78121e-11	1.47679e-11	4.3081e-11	1.47375e-11	1.65968e-11	1.66874e-11	1.13149e-11	1.95729e-11	1.50935e-11	1.84173e-11
21.32	1.3313e-11	1.75279e-11	2.36034e-11	1.6057e-11	1.71697e-11	1.85667e-11	3.68571e-11	1.3949e-11	1.78151e-11	1.47632e-11	4.30648e-11	1.47412e-11	1.66014e-11	1.66837e-11	1.13075e-11	1.95771e-11	1.50953e-11	1.84178e-11
21.34	1.33138e-11	1.75356e-11	2.361e-11	1.6058e-11	1.71768e-11	1.85641e-11	3.68601e-11	1.3952e-11	1.78099e-11	1.47643e-11	4.30657e-11	1.47369e-11	1.66011e-11	1.66848e-11	1.13147e-11	1.95713e-11	1.5093e-11	1.84122e-11
21.36	1.3313e-11	1.75215e-11	2.36164e-11	1.60635e-11	1.71725e-11	1.85715e-11	3.68626e-11	1.3943e-11	1.78168e-11	1.47656e-11	4.30753e-11	1.47358e-11	1.65988e-11	1.66885e-11	1.1306e-11	1.95731e-11	1.50936e-11	1.8421e-11
21.38	1.33114e-11	1.75216e-11	2.36171e-11	1.60667e-11	1.71751e-11	1.85687e-11	3.68701e-11	1.39461e-11	1.78127e-11	1.47597e-11	4.30719e-11	1.47378e-11	1.66011e-11	1.66814e-11	1.13119e-11	1.95773e-11	1.50878e-11	1.84096e-11
21.4	1.33122e-11	1.7527e-11	2.36176e-11	1.60638e-11	1.71741e-11	1.85648e-11	3.68695e-11	1.39471e-11	1.7812e-11	1.47607e-11	4.30816e-11	1.4742e-11	1.65978e-11	1.66863e-11	1.13134e-11	1.95741e-11	1.50917e-11	1.84162e-11
21.42	1.33175e-11	1.75258e-11	2.36322e-11	1.60607e-11	1.71686e-11	1.8558e-11	3.68617e-11	1.39554e-11	1.78114e-11	1.47621e-11	4.30829e-11	1.47355e-11	1.66005e-11	1.66905e-11	1.13112e-11	1.95747e-11	1.50877e-11	1.84216e-11
21.44	1.33117e-11	1.75235e-11	2.36191e-11	1.6066e-11	1.71738e-11	1.85695e-11	3.68641e-11	1.39533e-11	1.78136e-11	1.47639e-11	4.30508e-11	1.47404e-11	1.6604e-11	1.66852e-11	1.13153e-11	1.95675e-11	1.50909e-11	1.84205e-11
21.46	1.3318e-11	1.75244e-11	2.36142e-11	1.60585e-11	1.71722e-11	1.85667e-11	3.68677e-11	1.39562e-11	1.78103e-11	1.47626e-11	4.30649e-11	1.47399e-11	1.65973e-11	1.66869e-11	1.13098e-11	1.95746e-11	1.50928e-11	1.84123e-11
21.48	1.3317e-11	1.75228e-11	2.36201e-11	1.6057e-11	1.7172e-11	1.85675e-11	3.68627e-11	1.39543e-11	1.78104e-11	1.47594e-11	4.30767e-11	1.47355e-11	1.65957e-11	1.66811e-11	1.13071e-11	1.95707e-11	1.50847e-11	1.84102e-11
21.5	1.33121e-11	1.75281e-11	2.36214e-11	1.60599e-11	1.71718e-11	1.85651e-11	3.68641e-11	1.39542e-11	1.78119e-11	1.47636e-11	4.30736e-11	1.47432e-11	1.65981e-11	1.66824e-11	1.13112e-11	1.95712e-11	1.5086e-11	1.84147e-11
21.52	1.33134e-11	1.75152e-11	2.36199e-11	1.60648e-11	1.71719e-11	1.85695e-11	3.68648e-11	1.39562e-11	1.78121e-11	1.47582e-11	4.30553e-11	1.474e-11	1.65883e-11	1.66852e-11	1.13086e-11	1.95731e-11	1.50863e-11	1.84158e-11
21.54	1.33237e-11	1.75226e-11	2.36167e-11	1.60579e-11	1.71703e-11	1.85668e-11	3.68607e-11	1.39562e-11	1.78134e-11	1.47624e-11	4.30747e-11	1.47389e-11	1.65962e-11	1.66842e-11	1.13093e-11	1.9571e-11	1.50869e-11	1.84066e-11
21.56	1.33124e-11	1.75228e-11	2.36154e-11	1.60617e-11	1.71687e-11	1.85665e-11	3.68547e-11	1.39514e-11	1.78139e-11	1.47593e-11	4.30675e-11	1.47388e-11	1.65924e-11	1.66848e-11	1.13103e-11	1.95737e-11	1.50838e-11	1.84168e-11
21.58	1.33194e-11	1.75162e-11	2.36195e-11	1.60594e-11	1.71638e-11	1.85689e-11	3.68599e-11	1.39601e-11	1.78149e-11	1.47559e-11	4.30867e-11	1.47394e-11	1.65905e-11	1.66789e-11	1.13125e-11	1.95698e-11	1.5081e-11	1.84182e-11
21.6	1.33227e-11	1.75249e-11	2.36175e-11	1.60655e-11	1.71688e-11	1.85702e-11	3.68599e-11	1.39511e-11	1.78103e-11	1.47615e-11	4.30612e-11	1.47385e-11	1.65953e-11	1.66837e-11	1.13084e-11	1.9569e-11	1.5089e-11	1.84134e-11
21.62	1.33165e-11	1.75174e-11	2.36108e-11	1.60636e-11	1.71668e-11	1.85663e-11	3.68524e-11	1.3951e-11	1.78114e-11	1.4759e-11	4.30661e-11	1.47365e-11	1.65942e-11	1.66839e-11	1.13159e-11	1.95715e-11	1.50836e-11	1.84058e-11
21.64	1.33152e-11	1.75199e-11	2.36099e-11	1.60623e-11	1.71665e-11	1.85689e-11	3.68554e-11	1.39494e-11	1.78118e-11	1.47632e-11	4.30639e-11	1.47398e-11	1.65953e-11	1.66883e-11	1.1308e-11	1.95743e-11	1.50861e-11	1.84129e-11
21.66	1.33214e-11	1.75216e-11	2.36179e-11	1.60585e-11	1.71665e-11	1.8565e-11	3.6849e-11	1.39537e-11	1.78107e-11	1.47611e-11	4.30677e-11	1.47404e-11	1.65883e-11	1.66845e-11	1.13074e-11	1.95703e-11	1.50831e-11	1.84183e-11
21.68	1.33172e-11	1.75269e-11	2.36087e-11	1.60589e-11	1.71692e-11	1.85638e-11	3.68461e-11	1.39538e-11	1.78165e-11	1.47584e-11	4.3072e-11	1.47417e-11	1.65934e-11	1.66908e-11	1.13068e-11	1.957e-11	1.50856e-11	1.84187e-11
21.7	1.3315e-11	1.75134e-11	2.36126e-11	1.60575e-11	1.7169e-11	1.85686e-11	3.6841e-11	1.39507e-11	1.78169e-11	1.47603e-11	4.30751e-11	1.47378e-11	1.6584e-11	1.66889e-11	1.13116e-11	1.95728e-11	1.50846e-11	1.84136e-11
21.72	1.33159e-11	1.75175e-11	2.36122e-11	1.60586e-11	1.71683e-11	1.85711e-11	3.68387e-11	1.39505e-11	1.78133e-11	1.47615e-11	4.30844e-11	1.4736e-11	1.65856e-11	1.66922e-11	1.13121e-11	1.95708e-11	1.50825e-11	1.84161e-11
21.74	1.33183e-11	1.75247e-11	2.36114e-11	1.60604e-11	1.71668e-11	1.85694e-11	3.68424e-11	1.39467e-11	1.78159e-11	1.4763e-11	4.30807e-11	1.47403e-11	1.6592e-11	1.66883e-11	1.13088e-11	1.9573e-11	1.50845e-11	1.84151e-11
21.76	1.33163e-11	1.7528e-11	2.36194e-11	1.60616e-11	1.71707e-11	1.85694e-11	3.68395e-11	1.39565e-11	1.78084e-11	1.47579e-11	4.30781e-11	1.47404e-11	1.6585e-11	1.66837e-11	1.13116e-11	1.95694e-11	1.5089e-11	1.84159e-11
21.78	1.33168e-11	1.75135e-11	2.36282e-11	1.60605e-11	1.71698e-11	1.85713e-11	3.68404e-11	1.39444e-11	1.78126e-11	1.47641e-11	4.30766e-11	1.47361e-11	1.65951e-11	1.66877e-11	1.1312e-11	1.9572e-11	1.50909e-11	1.84135e-11
21.8	1.33169e-11	1.75193e-11	2.36221e-11	1.60591e-11	1.71685e-11	1.85695e-11	3.68352e-11	1.39528e-11	1.78139e-11	1.47615e-11	4.30776e-11	1.4735e-11	1.65895e-11	1.669e-11	1.13101e-11	1.95748e-11	1.50866e-11	1.8419e-11
21.82	1.33203e-11	1.75213e-11	2.36349e-11	1.60576e-11	1.71683e-11	1.85674e-11	3.68335e-11	1.39589e-11	1.781e-11	1.47592e-11	4.30637e-11	1.47379e-11	1.65921e-11	1.66913e-11	1.13104e-11	1.9575e-11	1.50883e-11	1.84137e-11
21.84	1.33141e-11	1.75218e-11	2.3621e-11	1.60599e-11	1.71642e-11	1.85675e-11	3.68358e-11	1.39465e-11	1.78152e-11	1.47612e-11	4.30536e-11	1.47352e-11	1.65941e-11	1.66877e-11	1.13165e-11	1.9576e-11	1.50912e-11	1.84104e-11
21.86	1.33181e-11	1.75171e-11	2.3612e-11	1.60606e-11	1.71668e-11	1.85679e-11	3.68474e-11	1.39553e-11	1.78146e-11	1.47603e-11	4.3063e-11	1.47375e-11	1.65962e-11	1.66846e-11	1.13091e-11	1.95726e-11	1.50946e-11	1.8412e-11
21.88	1.33113e-11	1.75185e-11	2.36243e-11	1.60591e-11	1.71673e-11	1.85664e-11	3.68345e-11	1.39463e-11	1.78089e-11	1.47579e-11	4.30836e-11	1.47313e-11	1.65865e-11	1.66897e-11	1.13098e-11	1.95744e-11	1.5087e-11	1.84054e-11
21.9	1.33202e-11	1.75227e-11	2.36322e-11	1.60619e-11	1.71661e-11	1.85696e-11	3.68352e-11	1.39513e-11	1.78187e-11	1.47569e-11	4.30829e-11	1.47397e-11	1.65934e-11	1.66907e-11	1.13101e-11	1.95738e-11	1.50848e-11	1.84083e-11
21.92	1.33229e-11	1.75176e-11	2.36264e-11	1.60651e-11	1.71712e-11	1.85662e-11	3.68373e-11	1.39516e-11	1.78129e-11	1.47584e-11	4.30985e-11	1.47432e-11	1.65964e-11	1.6689e-11	1.13094e-11	1.95729e-11	1.50909e-11	1.84182e-11
21.94	1.33225e-11	1.7531e-11	2.36251e-11	1.60544e-11	1.71683e-11	1.85675e-11	3.68395e-11	1.39488e-11	1.78171e-11	1.47565e-11	4.30781e-11	1.47351e-11	1.659e-11	1.66882e-11	1.131e-11	1.95728e-11	1.50893e-11	1.84083e-11
21.96	1.33178e-11	1.75267e-11	2.36274e-11	1.60627e-11	1.71708e-11	1.85629e-11	3.68329e-11	1.395e-11	1.78162e-11	1.47595e-11	4.30816e-11	1.4741e-11	1.65994e-11	1.66905e-11	1.13098e-11	1.95763e-11	1.50871e-11	1.84078e-11
21.98	1.33183e-11	1.75317e-11	2.36346e-11	1.60694e-11	1.71725e-11	1.85664e-11	3.68385e-11	1.39513e-11	1.78147e-11	1.47659e-11	4.30813e-11	1.47391e-11	1.6598e-11	1.66905e-11	1.13126e-11	1.95719e-11	1.50847e-11	1.84136e-11
22	1.33219e-11	1.75232e-11	2.36355e-11	1.60565e-11	1.71674e-11	1.85691e-11	3.68409e-11	1.39454e-11	1.78141e-11	1.47646e-11	4.30645e-11	1.47374e-11	1.66015e-11	1.66891e-11	1.13088e-11	1.95674e-11	1.50873e-11	1.8408e-11
22.02	1.3322e-11	1.75261e-11	2.36357e-11	1.60598e-11	1.71679e-11	1.85719e-11	3.68393e-11	1.39464e-11	1.78115e-11	1.47609e-11	4.30784e-11	1.47407e-11	1.66034e-11	1.66923e-11	1.13106e-11	1.95721e-11	1.50824e-11	1.8405e-11
22.04	1.33206e-11	1.75321e-11	2.36353e-11	1.60595e-11	1.71652e-11	1.85693e-11	3.68402e-11	1.39541e-11	1.78079e-11	1.47629e-11	4.30878e-11	1.47358e-11	1.65986e-11	1.66916e-11	1.13126e-11	1.95756e-11	1.50861e-11	1.84089e-11
22.06	1.332e-11	1.75333e-11	2.36263e-11	1.60567e-11	1.71715e-11	1.85689e-11	3.68322e-11	1.39526e-11	1.78128e-11	1.4764e-11	4.30839e-11	1.47352e-11	1.65961e-11	1.66892e-11	1.13061e-11	1.95722e-11	1.50795e-11	1.84049e-11
22.08	1.33178e-11	1.75318e-11	2.36425e-11	1.60563e-11	1.71631e-11	1.85679e-11	3.68375e-11	1.39527e-11	1.78111e-11	1.47662e-11	4.30906e-11	1.47412e-11	1.65991e-11	1.66847e-11	1.13147e-11	1.9573e-11	1.5084e-11	1.84129e-11
22.1	1.3322e-11	1.75352e-11	2.36393e-11	1.60557e-11	1.71677e-11	1.85637e-11	3.68402e-11	1.39509e-11	1.78112e-11	1.47632e-11	4.30808e-11	1.47361e-11	1.66034e-11	1.66857e-11	1.13059e-11	1.95697e-11	1.50832e-11	1.84093e-11
22.12	1.33241e-11	1.75214e-11	2.36228e-11	1.60621e-11	1.71695e-11	1.85677e-11	3.68395e-11	1.39542e-11	1.78157e-11	1.47645e-11	4.30814e-11	1.47407e-11	1.65999e-11	1.66881e-11	1.13091e-11	1.95705e-11	1.50864e-11	1.84081e-11
22.14	1.3323e-11	1.75309e-11	2.36287e-11	1.60575e-11	1.71642e-11	1.85654e-11	3.68427e-11	1.39567e-11	1.78117e-11	1.47597e-11	4.30897e-11	1.4739e-11	1.6604e-11	1.66897e-11	1.13119e-11	1.95725e-11	1.50872e-11	1.84079e-11
22.16	1.33184e-11	1.7531e-11	2.36312e-11	1.60604e-11	1.71623e-11	1.85706e-11	3.68383e-11	1.3957e-11	1.78161e-11	1.47641e-11	4.30876e-11	1.47351e-11	1.66023e-11	1.66872e-11	1.13127e-11	1.95786e-11	1.50889e-11	1.84111e-11
22.18	1.33226e-11	1.75292e-11	2.36335e-11	1.60561e-11	1.71634e-11	1.85643e-11	3.68427e-11	1.39522e-11	1.78114e-11	1.4756e-11	4.30898e-11	1.47402e-11	1.6616e-11	1.66848e-11	1.13117e-11	1.95707e-11	1.50887e-11	1.84109e-11
22.2	1.33172e-11	1.75309e-11	2.36225e-11	1.60612e-11	1.71686e-11	1.85676e-11	3.6836e-11	1.39478e-11	1.78049e-11	1.47607e-11	4.309e-11	1.47367e-11	1.6617e-11	1.66884e-11	1.13086e-11	1.95681e-11	1.50885e-11	1.84119e-11
22.22	1.33218e-11	1.75344e-11	2.36335e-11	1.60529e-11	1.71618e-11	1.85672e-11	3.68404e-11	1.39533e-11	1.78135e-11	1.47602e-11	4.30768e-11	1.47372e-11	1.66125e-11	1.66927e-11	1.13111e-11	1.95717e-11	1.50895e-11	1.84107e-11
22.24	1.33229e-11	1.75314e-11	2.36357e-11	1.60562e-11	1.7164e-11	1.85654e-11	3.68351e-11	1.39539e-11	1.78089e-11	1.47577e-11	4.30903e-11	1.47417e-11	1.6613e-11	1.66772e-11	1.13151e-11	1.95683e-11	1.50932e-11	1.84057e-11
22.26	1.3325e-11	1.75357e-11	2.36296e-11	1.60574e-11	1.71648e-11	1.85673e-11	3.68365e-11	1.39507e-11	1.78105e-11	1.47586e-11	4.30892e-11	1.47387e-11	1.66091e-11	1.66877e-11	1.13122e-11	1.95702e-11	1.50969e-11	1.84069e-11
22.28	1.33177e-11	1.75276e-11	2.36354e-11	1.60562e-11	1.71621e-11	1.85648e-11	3.68423e-11	1.39586e-11	1.78108e-11	1.47603e-11	4.30837e-11	1.47344e-11	1.66054e-11	1.66848e-11	1.13126e-11	1.95702e-11	1.50954e-11	1.84057e-11
22.3	1.3323e-11	1.75289e-11	2.36271e-11	1.60642e-11	1.71619e-11	1.85666e-11	3.68379e-11	1.39561e-11	1.78125e-11	1.47644e-11	4.30811e-11	1.47365e-11	1.6608e-11	1.66879e-11	1.13079e-11	1.95766e-11	1.50919e-11	1.84032e-11
22.32	1.33191e-11	1.75254e-11	2.36288e-11	1.60582e-11	1.71595e-11	1.85658e-11	3.68334e-11	1.39509e-11	1.78089e-11	1.47632e-11	4.3083e-11	1.47371e-11	1.66118e-11	1.66875e-11	1.13085e-11	1.95715e-11	1.50944e-11	1.84116e-11
22.34	1.33201e-11	1.75294e-11	2.36307e-11	1.60556e-11	1.71622e-11	1.85685e-11	3.68325e-11	1.3949e-11	1.78163e-11	1.47618e-11	4.30862e-11	1.47365e-11	1.66012e-11	1.66849e-11	1.1318e-11	1.95671e-11	1.50963e-11	1.84117e-11
22.36	1.33256e-11	1.753e-11	2.36215e-11	1.60559e-11	1.71643e-11	1.85717e-11	3.68367e-11	1.39548e-11	1.78099e-11	1.47614e-11	4.30813e-11	1.47373e-11	1.66026e-11	1.66811e-11	1.13086e-11	1.95725e-11	1.50967e-11	1.84062e-11
22.38	1.33203e-11	1.75245e-11	2.36234e-11	1.60515e-11	1.71638e-11	1.85666e-11	3.6832e-11	1.39533e-11	1.78112e-11	1.47626e-11	4.30865e-11	1.47365e-11	1.66068e-11	1.66892e-11	1.13075e-11	1.95693e-11	1.50907e-11	1.84083e-11
22.4	1.33188e-11	1.75291e-11	2.3632e-11	1.60531e-11	1.71658e-11	1.85683e-11	3.6835e-11	1.39545e-11	1.78112e-11	1.47592e-11	4.30744e-11	1.47388e-11	1.66073e-11	1.66857e-11	1.13066e-11	1.95649e-11	1.50888e-11	1.84118e-11
22.42	1.33184e-11	1.75274e-11	2.3631e-11	1.60553e-11	1.71643e-11	1.85646e-11	3.68278e-11	1.39597e-11	1.78113e-11	1.47586e-11	4.30864e-11	1.47378e-11	1.66063e-11	1.66836e-11	1.13099e-11	1.95677e-11	1.50913e-11	1.84076e-11
22.44	1.33174e-11	1.75297e-11	2.36227e-11	1.60566e-11	1.71625e-11	1.85628e-11	3.68246e-11	1.39531e-11	1.78107e-11	1.47603e-11	4.30791e-11	1.47375e-11	1.66084e-11	1.66876e-11	1.13154e-11	1.95745e-11	1.50966e-11	1.84119e-11
22.46	1.3324e-11	1.75256e-11	2.36223e-11	1.60524e-11	1.71586e-11	1.85648e-11	3.68464e-11	1.39504e-11	1.7811e-11	1.47637e-11	4.30841e-11	1.47375e-11	1.66056e-11	1.6689e-11	1.13088e-11	1.95705e-11	1.50899e-11	1.84171e-11
22.48	1.33206e-11	1.75238e-11	2.36292e-11	1.60547e-11	1.71605e-11	1.85649e-11	3.68403e-11	1.39485e-11	1.7809e-11	1.47609e-11	4.31014e-11	1.47348e-11	1.66068e-11	1.66894e-11	1.13111e-11	1.95696e-11	1.50851e-11	1.84112e-11
22.5	1.33239e-11	1.75293e-11	2.36094e-11	1.60551e-11	1.71631e-11	1.85669e-11	3.68415e-11	1.39575e-11	1.78101e-11	1.47626e-11	4.3082e-11	1.4731e-11	1.66183e-11	1.66806e-11	1.13142e-11	1.95677e-11	1.50898e-11	1.84136e-11
22.52	1.33213e-11	1.75242e-11	2.36142e-11	1.60552e-11	1.7165e-11	1.85689e-11	3.68399e-11	1.39476e-11	1.78108e-11	1.47609e-11	4.30767e-11	1.47396e-11	1.66074e-11	1.66859e-11	1.13133e-11	1.95683e-11	1.50895e-11	1.8405e-11
22.54	1.33248e-11	1.75304e-11	2.36173e-11	1.60537e-11	1.71647e-11	1.85679e-11	3.68382e-11	1.39459e-11	1.78098e-11	1.47569e-11	4.30921e-11	1.47367e-11	1.6603e-11	1.66892e-11	1.13118e-11	1.95679e-11	1.5092e-11	1.84004e-11
22.56	1.33171e-11	1.75278e-11	2.36201e-11	1.60557e-11	1.71626e-11	1.8566e-11	3.68361e-11	1.39491e-11	1.7813e-11	1.47653e-11	4.30779e-11	1.47359e-11	1.66106e-11	1.66857e-11	1.13089e-11	1.95687e-11	1.5096e-11	1.84075e-11
22.58	1.33228e-11	1.75345e-11	2.36258e-11	1.60554e-11	1.71629e-11	1.85635e-11	3.68397e-11	1.39557e-11	1.78099e-11	1.47615e-11	4.30934e-11	1.4731e-11	1.6604e-11	1.66849e-11	1.13132e-11	1.95675e-11	1.50911e-11	1.83996e-11
22.6	1.33246e-11	1.75222e-11	2.36162e-11	1.60546e-11	1.71587e-11	1.85691e-11	3.68415e-11	1.39501e-11	1.78085e-11	1.4761e-11	4.30928e-11	1.47324e-11	1.66059e-11	1.66846e-11	1.13161e-11	1.95701e-11	1.50929e-11	1.84033e-11
22.62	1.33245e-11	1.75308e-11	2.36249e-11	1.60565e-11	1.71587e-11	1.85622e-11	3.68405e-11	1.39476e-11	1.78111e-11	1.47634e-11	4.30889e-11	1.47347e-11	1.66057e-11	1.66792e-11	1.13143e-11	1.95674e-11	1.50975e-11	1.841e-11
22.64	1.33264e-11	1.75244e-11	2.36261e-11	1.60485e-11	1.71623e-11	1.85673e-11	3.68415e-11	1.3948e-11	1.7807e-11	1.47614e-11	4.30942e-11	1.47341e-11	1.66061e-11	1.66836e-11	1.13066e-11	1.95677e-11	1.50954e-11	1.8403e-11
22.66	1.33231e-11	1.75319e-11	2.3629e-11	1.60574e-11	1.71611e-11	1.85612e-11	3.68407e-11	1.3953e-11	1.78108e-11	1.47596e-11	4.30839e-11	1.47347e-11	1.66036e-11	1.66844e-11	1.13156e-11	1.95677e-11	1.50883e-11	1.84153e-11
22.68	1.33205e-11	1.75259e-11	2.36286e-11	1.60545e-11	1.71585e-11	1.85653e-11	3.68443e-11	1.39516e-11	1.78131e-11	1.47606e-11	4.30911e-11	1.47339e-11	1.66089e-11	1.66804e-11	1.1311e-11	1.95663e-11	1.50978e-11	1.84079e-11
22.7	1.33217e-11	1.75324e-11	2.36179e-11	1.6053e-11	1.71605e-11	1.85628e-11	3.68438e-11	1.39492e-11	1.78126e-11	1.47576e-11	4.3103e-11	1.47336e-11	1.6609e-11	1.66877e-11	1.13093e-11	1.95701e-11	1.50945e-11	1.84089e-11
22.72	1.33169e-11	1.75295e-11	2.36224e-11	1.60507e-11	1.71627e-11	1.85619e-11	3.68405e-11	1.39518e-11	1.78102e-11	1.47646e-11	4.30972e-11	1.47344e-11	1.66087e-11	1.66875e-11	1.13104e-11	1.95688e-11	1.51014e-11	1.84118e-11
22.74	1.33223e-11	1.75342e-11	2.36223e-11	1.60485e-11	1.71632e-11	1.85672e-11	3.68435e-11	1.395e-11	1.78126e-11	1.47631e-11	4.30995e-11	1.47342e-11	1.66071e-11	1.66902e-11	1.13167e-11	1.95648e-11	1.50988e-11	1.84118e-11
22.76	1.332e-11	1.75203e-11	2.36189e-11	1.60541e-11	1.71658e-11	1.85666e-11	3.68314e-11	1.39482e-11	1.78133e-11	1.47653e-11	4.31024e-11	1.47336e-11	1.6607e-11	1.6681e-11	1.13135e-11	1.95685e-11	1.5107e-11	1.8408e-11
22.78	1.33244e-11	1.75296e-11	2.36151e-11	1.60502e-11	1.71594e-11	1.85673e-11	3.68465e-11	1.39467e-11	1.78119e-11	1.47641e-11	4.3108e-11	1.47314e-11	1.66091e-11	1.66845e-11	1.13094e-11	1.95613e-11	1.51048e-11	1.841e-11
22.8	1.33231e-11	1.75257e-11	2.36183e-11	1.60516e-11	1.71574e-11	1.85637e-11	3.68388e-11	1.39485e-11	1.78157e-11	1.47622e-11	4.31013e-11	1.47297e-11	1.6609e-11	1.66841e-11	1.13149e-11	1.95642e-11	1.5097e-11	1.84161e-11
22.82	1.33241e-11	1.7521e-11	2.36131e-11	1.60554e-11	1.7164e-11	1.85648e-11	3.6846e-11	1.39487e-11	1.78111e-11	1.47618e-11	4.31066e-11	1.47324e-11	1.6608e-11	1.66807e-11	1.13071e-11	1.95632e-11	1.50986e-11	1.84164e-11
22.84	1.33245e-11	1.75296e-11	2.36204e-11	1.60579e-11	1.71565e-11	1.85672e-11	3.68429e-11	1.39487e-11	1.78219e-11	1.47597e-11	4.31039e-11	1.47299e-11	1.6611e-11	1.66834e-11	1.1307e-11	1.95663e-11	1.50919e-11	1.84005e-11
22.86	1.33294e-11	1.75307e-11	2.36133e-11	1.60497e-11	1.71614e-11	1.8569e-11	3.68441e-11	1.39472e-11	1.78113e-11	1.47613e-11	4.30862e-11	1.47308e-11	1.66118e-11	1.66886e-11	1.13119e-11	1.95657e-11	1.50933e-11	1.84081e-11
22.88	1.33277e-11	1.75244e-11	2.36129e-11	1.60534e-11	1.71566e-11	1.85637e-11	3.68398e-11	1.39462e-11	1.78149e-11	1.47621e-11	4.31037e-11	1.47294e-11	1.66089e-11	1.66872e-11	1.13132e-11	1.95648e-11	1.50948e-11	1.84055e-11
22.9	1.33221e-11	1.753e-11	2.36094e-11	1.6055e-11	1.71619e-11	1.8563e-11	3.68443e-11	1.39482e-11	1.78156e-11	1.4764e-11	4.30876e-11	1.47315e-11	1.66117e-11	1.66838e-11	1.13099e-11	1.95624e-11	1.50945e-11	1.84075e-11
22.92	1.33233e-11	1.75397e-11	2.36177e-11	1.60593e-11	1.71622e-11	1.85642e-11	3.68491e-11	1.39489e-11	1.78154e-11	1.47658e-11	4.3093e-11	1.47287e-11	1.66105e-11	1.66855e-11	1.13114e-11	1.956e-11	1.50993e-11	1.8401e-11
22.94	1.33191e-11	1.75345e-11	2.36244e-11	1.60575e-11	1.71633e-11	1.85647e-11	3.68443e-11	1.39446e-11	1.78173e-11	1.47637e-11	4.30978e-11	1.47384e-11	1.66091e-11	1.66842e-11	1.13128e-11	1.95557e-11	1.50979e-11	1.84008e-11
22.96	1.33154e-11	1.75394e-11	2.36143e-11	1.6058e-11	1.71608e-11	1.85693e-11	3.68449e-11	1.39437e-11	1.78165e-11	1.47607e-11	4.30866e-11	1.47306e-11	1.66054e-11	1.66822e-11	1.13119e-11	1.95603e-11	1.50966e-11	1.84037e-11
22.98	1.33237e-11	1.75395e-11	2.36189e-11	1.60562e-11	1.71547e-11	1.85649e-11	3.68425e-11	1.3946e-11	1.78117e-11	1.47613e-11	4.3091e-11	1.47295e-11	1.66068e-11	1.66841e-11	1.13111e-11	1.95573e-11	1.50921e-11	1.84048e-11
23	1.33187e-11	1.75404e-11	2.3626e-11	1.60496e-11	1.71595e-11	1.85693e-11	3.68434e-11	1.39466e-11	1.78129e-11	1.47591e-11	4.30914e-11	1.473e-11	1.66058e-11	1.66826e-11	1.13119e-11	1.95501e-11	1.51e-11	1.84071e-11
23.02	1.33202e-11	1.75381e-11	2.36171e-11	1.60561e-11	1.71607e-11	1.85633e-11	3.68363e-11	1.39493e-11	1.78105e-11	1.47647e-11	4.3086e-11	1.47327e-11	1.66137e-11	1.66893e-11	1.13129e-11	1.95558e-11	1.50956e-11	1.83992e-11
23.04	1.3317e-11	1.75415e-11	2.36123e-11	1.60557e-11	1.71572e-11	1.85581e-11	3.68365e-11	1.39489e-11	1.78105e-11	1.47638e-11	4.30838e-11	1.47275e-11	1.66046e-11	1.66826e-11	1.13093e-11	1.95618e-11	1.50942e-11	1.84054e-11
23.06	1.33138e-11	1.75386e-11	2.36105e-11	1.60623e-11	1.71532e-11	1.85635e-11	3.68408e-11	1.39467e-11	1.78151e-11	1.47606e-11	4.30803e-11	1.47303e-11	1.66109e-11	1.66893e-11	1.13055e-11	1.95568e-11	1.50865e-11	1.84059e-11
23.08	1.33202e-11	1.75382e-11	2.36099e-11	1.60531e-11	1.71638e-11	1.85612e-11	3.68357e-11	1.39352e-11	1.78147e-11	1.47616e-11	4.30804e-11	1.47302e-11	1.66118e-11	1.6692e-11	1.13075e-11	1.95601e-11	1.50914e-11	1.8399e-11
23.1	1.33166e-11	1.75358e-11	2.36152e-11	1.60544e-11	1.7161e-11	1.85653e-11	3.68352e-11	1.39318e-11	1.78143e-11	1.47608e-11	4.30937e-11	1.47258e-11	1.66171e-11	1.66829e-11	1.13056e-11	1.95526e-11	1.50918e-11	1.83985e-11
23.12	1.33225e-11	1.75417e-11	2.36213e-11	1.60569e-11	1.71637e-11	1.8564e-11	3.68331e-11	1.39308e-11	1.78114e-11	1.47654e-11	4.30863e-11	1.47319e-11	1.66157e-11	1.66831e-11	1.13013e-11	1.95567e-11	1.50957e-11	1.84011e-11
23.14	1.33159e-11	1.75409e-11	2.36342e-11	1.60505e-11	1.71616e-11	1.85649e-11	3.68298e-11	1.39363e-11	1.78108e-11	1.47695e-11	4.30862e-11	1.47338e-11	1.66114e-11	1.66883e-11	1.13116e-11	1.95593e-11	1.50925e-11	1.84031e-11
23.16	1.33218e-11	1.75357e-11	2.36264e-11	1.60636e-11	1.71572e-11	1.85688e-11	3.68341e-11	1.39327e-11	1.78124e-11	1.4764e-11	4.30965e-11	1.47334e-11	1.66107e-11	1.66897e-11	1.13136e-11	1.95582e-11	1.50915e-11	1.83983e-11
23.18	1.33207e-11	1.75351e-11	2.363e-11	1.60615e-11	1.71585e-11	1.85691e-11	3.68334e-11	1.39418e-11	1.78135e-11	1.4761e-11	4.30866e-11	1.47316e-11	1.66097e-11	1.66815e-11	1.13268e-11	1.95583e-11	1.50912e-11	1.84034e-11
23.2	1.33159e-11	1.75333e-11	2.36307e-11	1.60572e-11	1.71548e-11	1.8571e-11	3.6833e-11	1.39398e-11	1.781e-11	1.47643e-11	4.30766e-11	1.47307e-11	1.66098e-11	1.66853e-11	1.13255e-11	1.95555e-11	1.50915e-11	1.84015e-11
23.22	1.332e-11	1.75329e-11	2.36403e-11	1.60528e-11	1.71629e-11	1.85682e-11	3.68375e-11	1.39317e-11	1.78106e-11	1.47581e-11	4.30905e-11	1.47334e-11	1.66096e-11	1.66846e-11	1.13319e-11	1.95596e-11	1.50912e-11	1.83972e-11
23.24	1.33182e-11	1.75333e-11	2.36338e-11	1.60584e-11	1.71506e-11	1.85694e-11	3.68294e-11	1.39315e-11	1.78118e-11	1.47595e-11	4.30958e-11	1.47349e-11	1.66143e-11	1.66857e-11	1.13427e-11	1.95605e-11	1.50924e-11	1.83971e-11
23.26	1.33199e-11	1.75333e-11	2.36265e-11	1.60561e-11	1.71591e-11	1.85696e-11	3.68397e-11	1.39326e-11	1.78168e-11	1.47624e-11	4.31088e-11	1.47321e-11	1.66102e-11	1.66844e-11	1.13437e-11	1.95577e-11	1.50909e-11	1.84048e-11
23.28	1.33225e-11	1.75356e-11	2.36309e-11	1.60538e-11	1.71564e-11	1.85694e-11	3.68365e-11	1.39379e-11	1.78103e-11	1.47592e-11	4.30817e-11	1.47388e-11	1.66199e-11	1.66856e-11	1.13508e-11	1.95605e-11	1.50942e-11	1.83986e-11
23.3	1.33182e-11	1.75411e-11	2.36221e-11	1.60567e-11	1.71582e-11	1.85715e-11	3.68407e-11	1.39392e-11	1.78113e-11	1.47586e-11	4.30995e-11	1.47366e-11	1.66148e-11	1.66904e-11	1.13599e-11	1.95585e-11	1.5098e-11	1.83965e-11
23.32	1.33214e-11	1.75356e-11	2.36294e-11	1.60568e-11	1.71567e-11	1.85677e-11	3.68363e-11	1.394e-11	1.78105e-11	1.47545e-11	4.31008e-11	1.4729e-11	1.6616e-11	1.66861e-11	1.13636e-11	1.95579e-11	1.50953e-11	1.83937e-11
23.34	1.33234e-11	1.75316e-11	2.3636e-11	1.60558e-11	1.71567e-11	1.8573e-11	3.68459e-11	1.39393e-11	1.7811e-11	1.47632e-11	4.30921e-11	1.47359e-11	1.6606e-11	1.66884e-11	1.136e-11	1.95513e-11	1.50974e-11	1.83889e-11
23.36	1.3321e-11	1.75328e-11	2.36401e-11	1.60538e-11	1.7156e-11	1.85708e-11	3.68339e-11	1.3939e-11	1.78196e-11	1.47607e-11	4.3083e-11	1.47393e-11	1.66056e-11	1.66876e-11	1.13662e-11	1.95581e-11	1.50981e-11	1.84021e-11
23.38	1.33233e-11	1.75356e-11	2.36399e-11	1.60606e-11	1.71587e-11	1.85686e-11	3.68411e-11	1.39386e-11	1.78148e-11	1.47629e-11	4.31078e-11	1.47365e-11	1.66106e-11	1.66892e-11	1.13663e-11	1.95589e-11	1.51004e-11	1.84019e-11
23.4	1.3323e-11	1.75342e-11	2.36328e-11	1.60587e-11	1.71572e-11	1.85675e-11	3.68313e-11	1.394e-11	1.78173e-11	1.47608e-11	4.31044e-11	1.47321e-11	1.66064e-11	1.66822e-11	1.13671e-11	1.95643e-11	1.50973e-11	1.84019e-11
23.42	1.33262e-11	1.75363e-11	2.36386e-11	1.60597e-11	1.71542e-11	1.85684e-11	3.68255e-11	1.3936e-11	1.78109e-11	1.47626e-11	4.30979e-11	1.47297e-11	1.6608e-11	1.66856e-11	1.13662e-11	1.95587e-11	1.51015e-11	1.83895e-11
23.44	1.33264e-11	1.75332e-11	2.36476e-11	1.60591e-11	1.71568e-11	1.85735e-11	3.68252e-11	1.39381e-11	1.78133e-11	1.476e-11	4.30765e-11	1.4726e-11	1.66111e-11	1.66842e-11	1.13703e-11	1.95665e-11	1.51012e-11	1.84025e-11
23.46	1.33245e-11	1.75304e-11	2.36322e-11	1.60617e-11	1.71538e-11	1.85712e-11	3.68097e-11	1.39361e-11	1.78113e-11	1.47638e-11	4.30967e-11	1.47288e-11	1.66143e-11	1.66867e-11	1.13632e-11	1.95597e-11	1.51021e-11	1.84037e-11
23.48	1.33261e-11	1.75322e-11	2.36213e-11	1.60538e-11	1.71544e-11	1.85737e-11	3.68138e-11	1.39385e-11	1.78124e-11	1.47601e-11	4.30878e-11	1.47275e-11	1.66053e-11	1.66906e-11	1.13704e-11	1.9565e-11	1.50926e-11	1.83966e-11
23.5	1.33205e-11	1.75358e-11	2.36234e-11	1.60587e-11	1.71562e-11	1.85706e-11	3.68113e-11	1.39387e-11	1.78087e-11	1.47648e-11	4.30812e-11	1.473e-11	1.66069e-11	1.66854e-11	1.13686e-11	1.95603e-11	1.50976e-11	1.83981e-11
23.52	1.33247e-11	1.75316e-11	2.36295e-11	1.60617e-11	1.71573e-11	1.85701e-11	3.68097e-11	1.39359e-11	1.78114e-11	1.47633e-11	4.30848e-11	1.47326e-11	1.66099e-11	1.66889e-11	1.13625e-11	1.95636e-11	1.50917e-11	1.83973e-11
23.54	1.33241e-11	1.75344e-11	2.36239e-11	1.60617e-11	1.71551e-11	1.85688e-11	3.68147e-11	1.39358e-11	1.78163e-11	1.476e-11	4.30898e-11	1.47358e-11	1.66089e-11	1.66837e-11	1.13666e-11	1.95596e-11	1.50955e-11	1.84047e-11
23.56	1.33227e-11	1.75311e-11	2.36181e-11	1.60611e-11	1.71509e-11	1.85654e-11	3.68113e-11	1.39379e-11	1.7813e-11	1.476e-11	4.3092e-11	1.47395e-11	1.66035e-11	1.66836e-11	1.13655e-11	1.95538e-11	1.50981e-11	1.84041e-11
23.58	1.33272e-11	1.7536e-11	2.36234e-11	1.60596e-11	1.71541e-11	1.85661e-11	3.68101e-11	1.39481e-11	1.78145e-11	1.47598e-11	4.30977e-11	1.47343e-11	1.66091e-11	1.66841e-11	1.13646e-11	1.95578e-11	1.50976e-11	1.84045e-11
23.6	1.332e-11	1.75311e-11	2.3616e-11	1.60655e-11	1.71544e-11	1.85709e-11	3.68078e-11	1.39432e-11	1.78154e-11	1.47577e-11	4.3094e-11	1.473e-11	1.66121e-11	1.66882e-11	1.13703e-11	1.95619e-11	1.51008e-11	1.83968e-11
23.62	1.33205e-11	1.75315e-11	2.36255e-11	1.60615e-11	1.71532e-11	1.85656e-11	3.68097e-11	1.39465e-11	1.78132e-11	1.47699e-11	4.31009e-11	1.4729e-11	1.66075e-11	1.66908e-11	1.13667e-11	1.9565e-11	1.50997e-11	1.84061e-11
23.64	1.33201e-11	1.75333e-11	2.36312e-11	1.60601e-11	1.71523e-11	1.85721e-11	3.68088e-11	1.39434e-11	1.78137e-11	1.47659e-11	4.31103e-11	1.47311e-11	1.66114e-11	1.66842e-11	1.13637e-11	1.95646e-11	1.51035e-11	1.8402e-11
23.66	1.3324e-11	1.75336e-11	2.36151e-11	1.60548e-11	1.71545e-11	1.85724e-11	3.68056e-11	1.39395e-11	1.78136e-11	1.47595e-11	4.31015e-11	1.47355e-11	1.6612e-11	1.66836e-11	1.13653e-11	1.95588e-11	1.51005e-11	1.83945e-11
23.68	1.33202e-11	1.75318e-11	2.36226e-11	1.60564e-11	1.71556e-11	1.85663e-11	3.68046e-11	1.39371e-11	1.78158e-11	1.47606e-11	4.30959e-11	1.47336e-11	1.66127e-11	1.66841e-11	1.13617e-11	1.95658e-11	1.50997e-11	1.84046e-11
23.7	1.33163e-11	1.75351e-11	2.36212e-11	1.6061e-11	1.71592e-11	1.85704e-11	3.68112e-11	1.39442e-11	1.7809e-11	1.47643e-11	4.30952e-11	1.47304e-11	1.66092e-11	1.66847e-11	1.13574e-11	1.95609e-11	1.50971e-11	1.84006e-11
23.72	1.33208e-11	1.7533e-11	2.36206e-11	1.60535e-11	1.71535e-11	1.85688e-11	3.68165e-11	1.39426e-11	1.78115e-11	1.47664e-11	4.30984e-11	1.47319e-11	1.66125e-11	1.66883e-11	1.13634e-11	1.957e-11	1.51017e-11	1.84e-11
23.74	1.33141e-11	1.75337e-11	2.36259e-11	1.60563e-11	1.71527e-11	1.85681e-11	3.68134e-11	1.39411e-11	1.78144e-11	1.47627e-11	4.3112e-11	1.47297e-11	1.66067e-11	1.66844e-11	1.1365e-11	1.95624e-11	1.51028e-11	1.84003e-11
23.76	1.3325e-11	1.75281e-11	2.36221e-11	1.60507e-11	1.71509e-11	1.85711e-11	3.68108e-11	1.39397e-11	1.78144e-11	1.47614e-11	4.31012e-11	1.47281e-11	1.6609e-11	1.66877e-11	1.13686e-11	1.95603e-11	1.50945e-11	1.83956e-11
23.78	1.33185e-11	1.75335e-11	2.36265e-11	1.60588e-11	1.71626e-11	1.85594e-11	3.68116e-11	1.39423e-11	1.78073e-11	1.47621e-11	4.31048e-11	1.47336e-11	1.66049e-11	1.66846e-11	1.1361e-11	1.95618e-11	1.50963e-11	1.83992e-11
23.8	1.3325e-11	1.75327e-11	2.36267e-11	1.60569e-11	1.71599e-11	1.85667e-11	3.68134e-11	1.39458e-11	1.7812e-11	1.47623e-11	4.30929e-11	1.47299e-11	1.66101e-11	1.66881e-11	1.13625e-11	1.95582e-11	1.51013e-11	1.83923e-11
23.82	1.33206e-11	1.75406e-11	2.3629e-11	1.60499e-11	1.715e-11	1.85661e-11	3.68076e-11	1.39503e-11	1.78118e-11	1.47588e-11	4.31083e-11	1.47366e-11	1.66118e-11	1.66899e-11	1.13628e-11	1.95575e-11	1.51028e-11	1.83984e-11
23.84	1.33179e-11	1.75262e-11	2.36222e-11	1.60512e-11	1.71502e-11	1.85654e-11	3.68159e-11	1.39458e-11	1.78126e-11	1.47616e-11	4.30995e-11	1.47286e-11	1.66086e-11	1.66882e-11	1.13615e-11	1.95615e-11	1.51036e-11	1.83903e-11
23.86	1.33191e-11	1.75391e-11	2.36253e-11	1.60554e-11	1.7155e-11	1.85664e-11	3.68125e-11	1.3951e-11	1.781e-11	1.47619e-11	4.31168e-11	1.47349e-11	1.66159e-11	1.66857e-11	1.13604e-11	1.95655e-11	1.51092e-11	1.8398e-11
23.88	1.33202e-11	1.75313e-11	2.36302e-11	1.60571e-11	1.71572e-11	1.85615e-11	3.6814e-11	1.39389e-11	1.78139e-11	1.47585e-11	4.31052e-11	1.47302e-11	1.66083e-11	1.66932e-11	1.13649e-11	1.95601e-11	1.51059e-11	1.83983e-11
23.9	1.3325e-11	1.753e-11	2.3629e-11	1.60547e-11	1.71532e-11	1.85706e-11	3.68145e-11	1.39443e-11	1.78099e-11	1.47622e-11	4.31074e-11	1.47295e-11	1.66106e-11	1.66886e-11	1.13617e-11	1.95646e-11	1.51089e-11	1.83905e-11
23.92	1.33242e-11	1.75348e-11	2.36274e-11	1.60513e-11	1.71533e-11	1.85681e-11	3.68132e-11	1.3947e-11	1.78082e-11	1.47596e-11	4.31014e-11	1.47298e-11	1.66107e-11	1.6685e-11	1.13595e-11	1.95677e-11	1.51057e-11	1.8395e-11
23.94	1.3319e-11	1.75219e-11	2.36324e-11	1.60551e-11	1.71547e-11	1.85705e-11	3.68152e-11	1.39399e-11	1.78131e-11	1.47643e-11	4.31125e-11	1.47302e-11	1.66082e-11	1.66821e-11	1.13646e-11	1.95649e-11	1.51111e-11	1.83917e-11
23.96	1.33212e-11	1.75311e-11	2.36271e-11	1.60555e-11	1.71503e-11	1.85666e-11	3.68186e-11	1.39451e-11	1.7815e-11	1.47594e-11	4.30976e-11	1.47305e-11	1.66086e-11	1.66839e-11	1.13627e-11	1.95555e-11	1.51097e-11	1.8396e-11
23.98	1.33196e-11	1.75281e-11	2.36329e-11	1.60497e-11	1.71569e-11	1.85682e-11	3.68155e-11	1.39415e-11	1.78129e-11	1.47637e-11	4.31152e-11	1.47274e-11	1.66092e-11	1.6688e-11	1.13672e-11	1.95577e-11	1.51067e-11	1.83915e-11
24	1.33145e-11	1.75343e-11	2.36193e-11	1.60584e-11	1.71497e-11	1.85633e-11	3.68222e-11	1.3941e-11	1.78091e-11	1.47605e-11	4.30985e-11	1.47331e-11	1.66042e-11	1.66855e-11	1.13668e-11	1.95592e-11	1.51098e-11	1.83879e-11
24.02	1.33173e-11	1.75302e-11	2.3627e-11	1.60499e-11	1.71559e-11	1.85666e-11	3.68187e-11	1.39463e-11	1.78104e-11	1.47591e-11	4.31073e-11	1.47315e-11	1.66096e-11	1.66902e-11	1.13574e-11	1.95666e-11	1.5106e-11	1.84009e-11
24.04	1.33157e-11	1.75272e-11	2.36217e-11	1.60507e-11	1.71544e-11	1.85692e-11	3.68146e-11	1.39393e-11	1.78157e-11	1.47664e-11	4.31078e-11	1.4729e-11	1.66059e-11	1.66861e-11	1.13616e-11	1.95631e-11	1.51071e-11	1.8399e-11
24.06	1.33201e-11	1.75233e-11	2.36148e-11	1.60567e-11	1.71511e-11	1.85677e-11	3.68159e-11	1.39426e-11	1.78085e-11	1.47639e-11	4.31133e-11	1.47254e-11	1.66109e-11	1.6686e-11	1.13635e-11	1.95693e-11	1.51075e-11	1.8403e-11
24.08	1.33188e-11	1.75282e-11	2.36237e-11	1.60624e-11	1.71504e-11	1.85684e-11	3.68163e-11	1.39422e-11	1.7811e-11	1.47654e-11	4.31046e-11	1.47294e-11	1.66128e-11	1.66877e-11	1.13583e-11	1.95661e-11	1.511e-11	1.83915e-11
24.1	1.33185e-11	1.75282e-11	2.3618e-11	1.60625e-11	1.71459e-11	1.85674e-11	3.68195e-11	1.39433e-11	1.78127e-11	1.47631e-11	4.3098e-11	1.47336e-11	1.66106e-11	1.66923e-11	1.13555e-11	1.95649e-11	1.51105e-11	1.83999e-11
24.12	1.33226e-11	1.75347e-11	2.36189e-11	1.60588e-11	1.71537e-11	1.85648e-11	3.68201e-11	1.39408e-11	1.78097e-11	1.4764e-11	4.31037e-11	1.47221e-11	1.66085e-11	1.66823e-11	1.13628e-11	1.95632e-11	1.50981e-11	1.84044e-11
24.14	1.3319e-11	1.7528e-11	2.3621e-11	1.60592e-11	1.71517e-11	1.85692e-11	3.68177e-11	1.3941e-11	1.78124e-11	1.47647e-11	4.31077e-11	1.47269e-11	1.66114e-11	1.66832e-11	1.13643e-11	1.95637e-11	1.50983e-11	1.83924e-11
24.16	1.33196e-11	1.7525e-11	2.36192e-11	1.60602e-11	1.71518e-11	1.85691e-11	3.68143e-11	1.39505e-11	1.78141e-11	1.47581e-11	4.31145e-11	1.47325e-11	1.66096e-11	1.66841e-11	1.13601e-11	1.95656e-11	1.51072e-11	1.8402e-11
24.18	1.3315e-11	1.75255e-11	2.36293e-11	1.60594e-11	1.7146e-11	1.85688e-11	3.68177e-11	1.39405e-11	1.78162e-11	1.47611e-11	4.31117e-11	1.47307e-11	1.66149e-11	1.66882e-11	1.13623e-11	1.95653e-11	1.51067e-11	1.84022e-11
24.2	1.33249e-11	1.75322e-11	2.36241e-11	1.60604e-11	1.71458e-11	1.85731e-11	3.68129e-11	1.3947e-11	1.78113e-11	1.47635e-11	4.3124e-11	1.47258e-11	1.66108e-11	1.66888e-11	1.13569e-11	1.95694e-11	1.50991e-11	1.84014e-11
24.22	1.33212e-11	1.75327e-11	2.36292e-11	1.60597e-11	1.71537e-11	1.85638e-11	3.68167e-11	1.39516e-11	1.781e-11	1.47609e-11	4.31029e-11	1.47258e-11	1.66198e-11	1.66835e-11	1.13602e-11	1.95685e-11	1.5099e-11	1.83912e-11
24.24	1.3321e-11	1.75241e-11	2.3627e-11	1.60584e-11	1.71529e-11	1.85668e-11	3.68193e-11	1.39485e-11	1.78147e-11	1.476e-11	4.31059e-11	1.47326e-11	1.66117e-11	1.66886e-11	1.13577e-11	1.95645e-11	1.50984e-11	1.83895e-11
24.26	1.33246e-11	1.75251e-11	2.36319e-11	1.6058e-11	1.71526e-11	1.85659e-11	3.68158e-11	1.3944e-11	1.78107e-11	1.47628e-11	4.31112e-11	1.47291e-11	1.66077e-11	1.66884e-11	1.13608e-11	1.95684e-11	1.51024e-11	1.8401e-11
24.28	1.33265e-11	1.75244e-11	2.36262e-11	1.60589e-11	1.71569e-11	1.85622e-11	3.68158e-11	1.39456e-11	1.78091e-11	1.47636e-11	4.30995e-11	1.47291e-11	1.66093e-11	1.66858e-11	1.13626e-11	1.95698e-11	1.51009e-11	1.84042e-11
24.3	1.33219e-11	1.75207e-11	2.36358e-11	1.60575e-11	1.71509e-11	1.85608e-11	3.6817e-11	1.39486e-11	1.78151e-11	1.47635e-11	4.31123e-11	1.47283e-11	1.66056e-11	1.66842e-11	1.1363e-11	1.95704e-11	1.51031e-11	1.84047e-11
24.32	1.33271e-11	1.75238e-11	2.36275e-11	1.60592e-11	1.71518e-11	1.85655e-11	3.68194e-11	1.39488e-11	1.78071e-11	1.47625e-11	4.31224e-11	1.47252e-11	1.66065e-11	1.6688e-11	1.13601e-11	1.95708e-11	1.51045e-11	1.83969e-11
24.34	1.33232e-11	1.75232e-11	2.362e-11	1.60583e-11	1.71507e-11	1.8563e-11	3.68177e-11	1.39473e-11	1.78082e-11	1.47614e-11	4.31139e-11	1.47285e-11	1.66015e-11	1.66838e-11	1.13588e-11	1.9569e-11	1.51036e-11	1.83918e-11
24.36	1.33237e-11	1.7523e-11	2.36377e-11	1.60614e-11	1.71539e-11	1.85633e-11	3.68166e-11	1.39447e-11	1.78151e-11	1.47539e-11	4.31248e-11	1.4729e-11	1.66009e-11	1.66829e-11	1.13603e-11	1.95675e-11	1.51061e-11	1.83996e-11
24.38	1.33293e-11	1.75312e-11	2.36229e-11	1.60642e-11	1.71515e-11	1.8563e-11	3.68107e-11	1.39484e-11	1.78137e-11	1.47558e-11	4.31147e-11	1.47302e-11	1.66085e-11	1.66832e-11	1.13616e-11	1.95699e-11	1.51037e-11	1.83982e-11
24.4	1.33237e-11	1.75175e-11	2.36249e-11	1.60622e-11	1.7148e-11	1.85631e-11	3.68126e-11	1.39432e-11	1.78081e-11	1.47614e-11	4.31279e-11	1.47313e-11	1.66063e-11	1.6685e-11	1.13572e-11	1.95685e-11	1.51035e-11	1.83961e-11
24.42	1.33235e-11	1.75237e-11	2.36255e-11	1.60576e-11	1.71477e-11	1.85575e-11	3.68182e-11	1.39415e-11	1.78139e-11	1.47605e-11	4.31201e-11	1.47252e-11	1.6611e-11	1.66861e-11	1.1362e-11	1.95662e-11	1.51035e-11	1.83928e-11
24.44	1.33193e-11	1.75347e-11	2.36241e-11	1.60629e-11	1.71469e-11	1.85619e-11	3.68248e-11	1.39452e-11	1.78168e-11	1.47581e-11	4.31032e-11	1.47259e-11	1.66125e-11	1.6683e-11	1.13641e-11	1.95699e-11	1.51054e-11	1.83972e-11
24.46	1.33233e-11	1.75324e-11	2.3615e-11	1.60596e-11	1.7148e-11	1.85617e-11	3.68109e-11	1.39508e-11	1.78127e-11	1.47606e-11	4.31195e-11	1.47298e-11	1.66129e-11	1.66883e-11	1.13603e-11	1.95695e-11	1.5105e-11	1.83936e-11
24.48	1.33198e-11	1.75281e-11	2.36121e-11	1.60612e-11	1.71465e-11	1.85637e-11	3.68238e-11	1.39449e-11	1.781e-11	1.47622e-11	4.31095e-11	1.47291e-11	1.66065e-11	1.66864e-11	1.13614e-11	1.95676e-11	1.51083e-11	1.83933e-11
24.5	1.3325e-11	1.75267e-11	2.36187e-11	1.60514e-11	1.71469e-11	1.85663e-11	3.68215e-11	1.39503e-11	1.78128e-11	1.4759e-11	4.31272e-11	1.47296e-11	1.65964e-11	1.66837e-11	1.1359e-11	1.95624e-11	1.5103e-11	1.84004e-11
24.52	1.33127e-11	1.75255e-11	2.36178e-11	1.60595e-11	1.71466e-11	1.8565e-11	3.6819e-11	1.39445e-11	1.78114e-11	1.47599e-11	4.31042e-11	1.47252e-11	1.65996e-11	1.66848e-11	1.13655e-11	1.95685e-11	1.51032e-11	1.84011e-11
24.54	1.33196e-11	1.75291e-11	2.36131e-11	1.60569e-11	1.71449e-11	1.85601e-11	3.68223e-11	1.3942e-11	1.78136e-11	1.47604e-11	4.31134e-11	1.47283e-11	1.66098e-11	1.6689e-11	1.13649e-11	1.95685e-11	1.51042e-11	1.84025e-11
24.56	1.33155e-11	1.75265e-11	2.36232e-11	1.60586e-11	1.71477e-11	1.8565e-11	3.6824e-11	1.39414e-11	1.78104e-11	1.47578e-11	4.31197e-11	1.47306e-11	1.66027e-11	1.66924e-11	1.13622e-11	1.95677e-11	1.51037e-11	1.83928e-11
24.58	1.33253e-11	1.75359e-11	2.36279e-11	1.60542e-11	1.71477e-11	1.85585e-11	3.68203e-11	1.39401e-11	1.78083e-11	1.47613e-11	4.31168e-11	1.47227e-11	1.66061e-11	1.66853e-11	1.13655e-11	1.95658e-11	1.51091e-11	1.84007e-11
24.6	1.33187e-11	1.75228e-11	2.36244e-11	1.60641e-11	1.71475e-11	1.85628e-11	3.68251e-11	1.39436e-11	1.78071e-11	1.4754e-11	4.31232e-11	1.47285e-11	1.66028e-11	1.66887e-11	1.13653e-11	1.95694e-11	1.51026e-11	1.83991e-11
24.62	1.33203e-11	1.75166e-11	2.36299e-11	1.60577e-11	1.71499e-11	1.8561e-11	3.6829e-11	1.39452e-11	1.78106e-11	1.4759e-11	4.31066e-11	1.4726e-11	1.66028e-11	1.66933e-11	1.13642e-11	1.95657e-11	1.5106e-11	1.83955e-11
24.64	1.33184e-11	1.75291e-11	2.36189e-11	1.60615e-11	1.71458e-11	1.85635e-11	3.68273e-11	1.39461e-11	1.78074e-11	1.47605e-11	4.3117e-11	1.47258e-11	1.66013e-11	1.66841e-11	1.13572e-11	1.95688e-11	1.51059e-11	1.8396e-11
24.66	1.33305e-11	1.75181e-11	2.36104e-11	1.6057e-11	1.71509e-11	1.85636e-11	3.68215e-11	1.39506e-11	1.78136e-11	1.47604e-11	4.31317e-11	1.47201e-11	1.66013e-11	1.66852e-11	1.13646e-11	1.95682e-11	1.51055e-11	1.84031e-11
24.68	1.33191e-11	1.75169e-11	2.36274e-11	1.60558e-11	1.71441e-11	1.85597e-11	3.68253e-11	1.39491e-11	1.78109e-11	1.47563e-11	4.31135e-11	1.47274e-11	1.66027e-11	1.66943e-11	1.13595e-11	1.95714e-11	1.51025e-11	1.83917e-11
24.7	1.33253e-11	1.75189e-11	2.36279e-11	1.60625e-11	1.71441e-11	1.85608e-11	3.68227e-11	1.3947e-11	1.78112e-11	1.47593e-11	4.31145e-11	1.47203e-11	1.66012e-11	1.66934e-11	1.13583e-11	1.95679e-11	1.51069e-11	1.83983e-11
24.72	1.33197e-11	1.75245e-11	2.36338e-11	1.6059e-11	1.71469e-11	1.85634e-11	3.6822e-11	1.39459e-11	1.78101e-11	1.47636e-11	4.3134e-11	1.47235e-11	1.66015e-11	1.66894e-11	1.13655e-11	1.95693e-11	1.51017e-11	1.83903e-11
24.74	1.33193e-11	1.75274e-11	2.36271e-11	1.60525e-11	1.71513e-11	1.85591e-11	3.68262e-11	1.39487e-11	1.78077e-11	1.47645e-11	4.31267e-11	1.47268e-11	1.66008e-11	1.66792e-11	1.13625e-11	1.95638e-11	1.51065e-11	1.83986e-11
24.76	1.33153e-11	1.75231e-11	2.36309e-11	1.60514e-11	1.71441e-11	1.8555e-11	3.6824e-11	1.39521e-11	1.78089e-11	1.47588e-11	4.31213e-11	1.47264e-11	1.65985e-11	1.66845e-11	1.13609e-11	1.95634e-11	1.50996e-11	1.83944e-11
24.78	1.33181e-11	1.75235e-11	2.36376e-11	1.60528e-11	1.71456e-11	1.8561e-11	3.68258e-11	1.395e-11	1.78086e-11	1.4756e-11	4.31264e-11	1.47215e-11	1.66017e-11	1.66896e-11	1.13609e-11	1.95706e-11	1.51102e-11	1.84025e-11
24.8	1.33113e-11	1.75209e-11	2.36258e-11	1.60564e-11	1.71452e-11	1.85639e-11	3.68238e-11	1.39378e-11	1.7806e-11	1.4757e-11	4.31392e-11	1.47274e-11	1.66088e-11	1.66885e-11	1.13675e-11	1.95708e-11	1.51092e-11	1.83985e-11
24.82	1.3318e-11	1.75178e-11	2.36249e-11	1.60594e-11	1.71469e-11	1.85584e-11	3.68208e-11	1.3946e-11	1.78086e-11	1.47603e-11	4.31257e-11	1.47261e-11	1.6603e-11	1.66923e-11	1.13639e-11	1.95695e-11	1.51051e-11	1.8401e-11
24.84	1.33154e-11	1.75167e-11	2.36229e-11	1.60543e-11	1.71462e-11	1.85591e-11	3.68181e-11	1.3948e-11	1.78082e-11	1.47593e-11	4.31161e-11	1.47206e-11	1.66016e-11	1.66927e-11	1.1366e-11	1.95726e-11	1.51073e-11	1.83886e-11
24.86	1.33173e-11	1.75162e-11	2.36186e-11	1.60556e-11	1.71441e-11	1.85607e-11	3.68229e-11	1.39465e-11	1.78057e-11	1.47612e-11	4.31129e-11	1.47229e-11	1.66086e-11	1.66922e-11	1.13616e-11	1.95696e-11	1.51069e-11	1.83979e-11
24.88	1.33189e-11	1.75215e-11	2.36226e-11	1.60532e-11	1.71488e-11	1.85632e-11	3.68244e-11	1.3946e-11	1.78133e-11	1.47592e-11	4.31212e-11	1.47227e-11	1.66079e-11	1.66874e-11	1.13686e-11	1.95714e-11	1.51075e-11	1.84051e-11
24.9	1.33222e-11	1.75249e-11	2.3629e-11	1.60524e-11	1.71482e-11	1.85593e-11	3.68256e-11	1.39459e-11	1.78085e-11	1.47589e-11	4.31287e-11	1.47233e-11	1.66023e-11	1.66865e-11	1.13589e-11	1.95734e-11	1.51065e-11	1.83979e-11
24.92	1.33188e-11	1.75182e-11	2.36195e-11	1.60549e-11	1.71453e-11	1.85573e-11	3.68263e-11	1.39437e-11	1.78097e-11	1.47625e-11	4.31248e-11	1.47275e-11	1.66066e-11	1.66904e-11	1.13645e-11	1.95719e-11	1.51069e-11	1.83988e-11
24.94	1.33181e-11	1.75182e-11	2.36216e-11	1.60548e-11	1.71454e-11	1.85614e-11	3.68248e-11	1.39384e-11	1.78054e-11	1.476e-11	4.31223e-11	1.47205e-11	1.66075e-11	1.66853e-11	1.13684e-11	1.95789e-11	1.51065e-11	1.84018e-11
24.96	1.33231e-11	1.75147e-11	2.36233e-11	1.6058e-11	1.71482e-11	1.85605e-11	3.68189e-11	1.3942e-11	1.78075e-11	1.4755e-11	4.31295e-11	1.47233e-11	1.66117e-11	1.66874e-11	1.13701e-11	1.95725e-11	1.51044e-11	1.84073e-11
24.98	1.33181e-11	1.75213e-11	2.36246e-11	1.60525e-11	1.71511e-11	1.85604e-11	3.68208e-11	1.39438e-11	1.78095e-11	1.47593e-11	4.31176e-11	1.47207e-11	1.66082e-11	1.66846e-11	1.13675e-11	1.95743e-11	1.51048e-11	1.83934e-11
25	1.33182e-11	1.75185e-11	2.36351e-11	1.60594e-11	1.71496e-11	1.85586e-11	3.68189e-11	1.39487e-11	1.78007e-11	1.47596e-11	4.31111e-11	1.47208e-11	1.66061e-11	1.66914e-11	1.13612e-11	1.95728e-11	1.51061e-11	1.83963e-11
25.02	1.33127e-11	1.75224e-11	2.36285e-11	1.60566e-11	1.71512e-11	1.85535e-11	3.68266e-11	1.39438e-11	1.78045e-11	1.47586e-11	4.31173e-11	1.47244e-11	1.66068e-11	1.66879e-11	1.13679e-11	1.95746e-11	1.51043e-11	1.8401e-11
25.04	1.33161e-11	1.7517e-11	2.36323e-11	1.60547e-11	1.71415e-11	1.85568e-11	3.68249e-11	1.39467e-11	1.78045e-11	1.47551e-11	4.31185e-11	1.47188e-11	1.66125e-11	1.669e-11	1.13683e-11	1.95673e-11	1.51016e-11	1.8403e-11
25.06	1.33184e-11	1.75223e-11	2.3631e-11	1.60535e-11	1.71457e-11	1.85562e-11	3.68196e-11	1.39489e-11	1.78121e-11	1.47567e-11	4.3117e-11	1.47229e-11	1.66044e-11	1.66867e-11	1.13609e-11	1.95683e-11	1.51072e-11	1.83943e-11
25.08	1.33222e-11	1.75182e-11	2.36249e-11	1.60579e-11	1.71428e-11	1.85618e-11	3.68241e-11	1.39398e-11	1.78104e-11	1.47579e-11	4.3121e-11	1.47249e-11	1.65997e-11	1.66875e-11	1.13637e-11	1.95768e-11	1.51086e-11	1.83987e-11
25.1	1.33189e-11	1.75251e-11	2.36282e-11	1.60566e-11	1.71476e-11	1.85586e-11	3.6822e-11	1.39422e-11	1.78097e-11	1.47609e-11	4.31234e-11	1.47224e-11	1.66011e-11	1.66913e-11	1.13622e-11	1.95711e-11	1.51101e-11	1.84019e-11
25.12	1.33139e-11	1.75237e-11	2.36188e-11	1.60627e-11	1.71433e-11	1.85632e-11	3.6825e-11	1.39438e-11	1.78081e-11	1.47571e-11	4.31156e-11	1.47254e-11	1.66022e-11	1.66883e-11	1.1365e-11	1.95743e-11	1.51071e-11	1.84073e-11
25.14	1.33162e-11	1.75187e-11	2.36199e-11	1.60582e-11	1.71412e-11	1.85571e-11	3.68273e-11	1.39459e-11	1.78151e-11	1.47602e-11	4.31284e-11	1.47244e-11	1.65975e-11	1.66852e-11	1.13687e-11	1.95723e-11	1.51085e-11	1.84055e-11
25.16	1.332e-11	1.75221e-11	2.36322e-11	1.6065e-11	1.7142e-11	1.85632e-11	3.68218e-11	1.3938e-11	1.78135e-11	1.47627e-11	4.31304e-11	1.47236e-11	1.66043e-11	1.66914e-11	1.13691e-11	1.95727e-11	1.51074e-11	1.83994e-11
25.18	1.33214e-11	1.75209e-11	2.36293e-11	1.6054e-11	1.71445e-11	1.8566e-11	3.68269e-11	1.39423e-11	1.78061e-11	1.47614e-11	4.31195e-11	1.47223e-11	1.66052e-11	1.6681e-11	1.1372e-11	1.95709e-11	1.5104e-11	1.84069e-11
25.2	1.33186e-11	1.75177e-11	2.36318e-11	1.60559e-11	1.71498e-11	1.85608e-11	3.68225e-11	1.39392e-11	1.78107e-11	1.47639e-11	4.31213e-11	1.47222e-11	1.66052e-11	1.66844e-11	1.13691e-11	1.9572e-11	1.51093e-11	1.83996e-11
25.22	1.33239e-11	1.75169e-11	2.36311e-11	1.60574e-11	1.71434e-11	1.85608e-11	3.68297e-11	1.39427e-11	1.78033e-11	1.4764e-11	4.31235e-11	1.4722e-11	1.66024e-11	1.66951e-11	1.13718e-11	1.95725e-11	1.51061e-11	1.84025e-11
25.24	1.33233e-11	1.75213e-11	2.36471e-11	1.60562e-11	1.71442e-11	1.8565e-11	3.68343e-11	1.3943e-11	1.78074e-11	1.47541e-11	4.31177e-11	1.47182e-11	1.65984e-11	1.66853e-11	1.13725e-11	1.95708e-11	1.51118e-11	1.83973e-11
25.26	1.33178e-11	1.75192e-11	2.3622e-11	1.60586e-11	1.71524e-11	1.85593e-11	3.68306e-11	1.39411e-11	1.78082e-11	1.476e-11	4.31073e-11	1.4722e-11	1.66041e-11	1.66839e-11	1.13697e-11	1.95753e-11	1.51125e-11	1.84026e-11
25.28	1.33196e-11	1.752e-11	2.36214e-11	1.60603e-11	1.71516e-11	1.85582e-11	3.68266e-11	1.39435e-11	1.78077e-11	1.47647e-11	4.31207e-11	1.47233e-11	1.66048e-11	1.66836e-11	1.1372e-11	1.95725e-11	1.51129e-11	1.83999e-11
25.3	1.33208e-11	1.75146e-11	2.36282e-11	1.6051e-11	1.71467e-11	1.85614e-11	3.68315e-11	1.39401e-11	1.78041e-11	1.47602e-11	4.31224e-11	1.4721e-11	1.66008e-11	1.66849e-11	1.13713e-11	1.95719e-11	1.51105e-11	1.84033e-11
25.32	1.3323e-11	1.7529e-11	2.36309e-11	1.60513e-11	1.71442e-11	1.85663e-11	3.683e-11	1.39406e-11	1.78055e-11	1.47573e-11	4.31204e-11	1.47216e-11	1.66087e-11	1.66846e-11	1.13712e-11	1.95786e-11	1.51095e-11	1.84102e-11
25.34	1.33247e-11	1.75149e-11	2.3631e-11	1.60578e-11	1.71404e-11	1.85599e-11	3.68301e-11	1.3944e-11	1.78075e-11	1.47614e-11	4.31189e-11	1.47209e-11	1.66122e-11	1.66895e-11	1.13737e-11	1.95747e-11	1.51063e-11	1.84059e-11
25.36	1.33203e-11	1.75155e-11	2.36374e-11	1.60551e-11	1.71425e-11	1.85603e-11	3.68306e-11	1.39428e-11	1.78076e-11	1.47609e-11	4.31177e-11	1.47185e-11	1.66027e-11	1.66836e-11	1.13771e-11	1.95752e-11	1.51116e-11	1.83985e-11
25.38	1.33201e-11	1.75267e-11	2.36396e-11	1.60564e-11	1.71435e-11	1.85587e-11	3.68287e-11	1.39412e-11	1.78031e-11	1.4763e-11	4.31018e-11	1.47187e-11	1.66065e-11	1.66836e-11	1.13729e-11	1.95704e-11	1.51015e-11	1.84054e-11
25.4	1.33222e-11	1.75172e-11	2.36395e-11	1.60534e-11	1.71415e-11	1.85568e-11	3.68268e-11	1.39424e-11	1.78048e-11	1.47629e-11	4.31255e-11	1.47169e-11	1.66073e-11	1.66847e-11	1.13729e-11	1.95752e-11	1.511e-11	1.84034e-11
25.42	1.33163e-11	1.75199e-11	2.36432e-11	1.60546e-11	1.71478e-11	1.85639e-11	3.68321e-11	1.39474e-11	1.78092e-11	1.4757e-11	4.31167e-11	1.4727e-11	1.66083e-11	1.66805e-11	1.13726e-11	1.95742e-11	1.51087e-11	1.8398e-11
25.44	1.33204e-11	1.75175e-11	2.36333e-11	1.605e-11	1.71453e-11	1.85623e-11	3.68256e-11	1.39463e-11	1.78082e-11	1.47571e-11	4.31071e-11	1.47244e-11	1.661e-11	1.66861e-11	1.13797e-11	1.95769e-11	1.51136e-11	1.84035e-11
25.46	1.33258e-11	1.75172e-11	2.36246e-11	1.60553e-11	1.71424e-11	1.85662e-11	3.68288e-11	1.39432e-11	1.78036e-11	1.47626e-11	4.31155e-11	1.47281e-11	1.66106e-11	1.66873e-11	1.13768e-11	1.95778e-11	1.51127e-11	1.84053e-11
25.48	1.33167e-11	1.75201e-11	2.36394e-11	1.6049e-11	1.7143e-11	1.85617e-11	3.68283e-11	1.39423e-11	1.78067e-11	1.47599e-11	4.31186e-11	1.47255e-11	1.66085e-11	1.66842e-11	1.13739e-11	1.95765e-11	1.51029e-11	1.83984e-11
25.5	1.33202e-11	1.75242e-11	2.36509e-11	1.60517e-11	1.7147e-11	1.85601e-11	3.68345e-11	1.39565e-11	1.78115e-11	1.47636e-11	4.31136e-11	1.47225e-11	1.66087e-11	1.66825e-11	1.13779e-11	1.95754e-11	1.51105e-11	1.83972e-11
25.52	1.33232e-11	1.75173e-11	2.36432e-11	1.60516e-11	1.71396e-11	1.85591e-11	3.68313e-11	1.39431e-11	1.78031e-11	1.47581e-11	4.31092e-11	1.47252e-11	1.66063e-11	1.66881e-11	1.13803e-11	1.95729e-11	1.51135e-11	1.83958e-11
25.54	1.33256e-11	1.75111e-11	2.36287e-11	1.60565e-11	1.71477e-11	1.85654e-11	3.68305e-11	1.39476e-11	1.7798e-11	1.47562e-11	4.31188e-11	1.47147e-11	1.66113e-11	1.66937e-11	1.1371e-11	1.95716e-11	1.51178e-11	1.83982e-11
25.56	1.33268e-11	1.75125e-11	2.36347e-11	1.60494e-11	1.71433e-11	1.85589e-11	3.68276e-11	1.3945e-11	1.78059e-11	1.47573e-11	4.31143e-11	1.47176e-11	1.66149e-11	1.66837e-11	1.13745e-11	1.95732e-11	1.51146e-11	1.83977e-11
25.58	1.33299e-11	1.75274e-11	2.3642e-11	1.60542e-11	1.71444e-11	1.85569e-11	3.6829e-11	1.39484e-11	1.78124e-11	1.47633e-11	4.31176e-11	1.47206e-11	1.66117e-11	1.66857e-11	1.13779e-11	1.9574e-11	1.51119e-11	1.83971e-11
25.6	1.33268e-11	1.75208e-11	2.36341e-11	1.60518e-11	1.71414e-11	1.85631e-11	3.68265e-11	1.39458e-11	1.7808e-11	1.4758e-11	4.31126e-11	1.47195e-11	1.66031e-11	1.66834e-11	1.13791e-11	1.95713e-11	1.5109e-11	1.84003e-11
25.62	1.3327e-11	1.7518e-11	2.36384e-11	1.6055e-11	1.71493e-11	1.85569e-11	3.68248e-11	1.39489e-11	1.78048e-11	1.47586e-11	4.31087e-11	1.47184e-11	1.66113e-11	1.6682e-11	1.13714e-11	1.9574e-11	1.51114e-11	1.83978e-11
25.64	1.33259e-11	1.75259e-11	2.36274e-11	1.60504e-11	1.71447e-11	1.85597e-11	3.68286e-11	1.39441e-11	1.78092e-11	1.47665e-11	4.31166e-11	1.47218e-11	1.66083e-11	1.66852e-11	1.13706e-11	1.95739e-11	1.51186e-11	1.83947e-11
25.66	1.33287e-11	1.75146e-11	2.36313e-11	1.60519e-11	1.71443e-11	1.85623e-11	3.68254e-11	1.39505e-11	1.7811e-11	1.4764e-11	4.31189e-11	1.47173e-11	1.66028e-11	1.66834e-11	1.13752e-11	1.95775e-11	1.51172e-11	1.83974e-11
25.68	1.3329e-11	1.75179e-11	2.36324e-11	1.60582e-11	1.71425e-11	1.85619e-11	3.68244e-11	1.39452e-11	1.78056e-11	1.47606e-11	4.31155e-11	1.47256e-11	1.66158e-11	1.66873e-11	1.13812e-11	1.95739e-11	1.51147e-11	1.84e-11
25.7	1.33261e-11	1.75254e-11	2.36317e-11	1.60577e-11	1.71425e-11	1.85636e-11	3.68276e-11	1.39497e-11	1.77985e-11	1.47635e-11	4.31125e-11	1.47261e-11	1.661e-11	1.66857e-11	1.13786e-11	1.95746e-11	1.51132e-11	1.83979e-11
25.72	1.33257e-11	1.75206e-11	2.36317e-11	1.60553e-11	1.71428e-11	1.85586e-11	3.68291e-11	1.39414e-11	1.78029e-11	1.47637e-11	4.3121e-11	1.47241e-11	1.6614e-11	1.66911e-11	1.13797e-11	1.95807e-11	1.51085e-11	1.83996e-11
25.74	1.3325e-11	1.75136e-11	2.36331e-11	1.60531e-11	1.71426e-11	1.85534e-11	3.68318e-11	1.3946e-11	1.78027e-11	1.47599e-11	4.31169e-11	1.47169e-11	1.66096e-11	1.66852e-11	1.13812e-11	1.957e-11	1.51073e-11	1.83939e-11
25.76	1.33257e-11	1.75157e-11	2.36319e-11	1.60509e-11	1.7138e-11	1.85588e-11	3.68307e-11	1.39465e-11	1.78097e-11	1.47601e-11	4.31196e-11	1.47232e-11	1.66032e-11	1.66832e-11	1.13767e-11	1.95762e-11	1.51079e-11	1.83982e-11
25.78	1.33245e-11	1.75209e-11	2.3636e-11	1.60539e-11	1.71451e-11	1.85598e-11	3.68289e-11	1.395e-11	1.78013e-11	1.47634e-11	4.31205e-11	1.47184e-11	1.66017e-11	1.66844e-11	1.13783e-11	1.95763e-11	1.51075e-11	1.83953e-11
25.8	1.33225e-11	1.7526e-11	2.36454e-11	1.60501e-11	1.71413e-11	1.85534e-11	3.68324e-11	1.39459e-11	1.78063e-11	1.47663e-11	4.31154e-11	1.47183e-11	1.66006e-11	1.6687e-11	1.13815e-11	1.95745e-11	1.50924e-11	1.83909e-11
25.82	1.33256e-11	1.75164e-11	2.3634e-11	1.60504e-11	1.71418e-11	1.85601e-11	3.68334e-11	1.39528e-11	1.78054e-11	1.47616e-11	4.31175e-11	1.47174e-11	1.65852e-11	1.66798e-11	1.13808e-11	1.9571e-11	1.50793e-11	1.83926e-11
25.84	1.33255e-11	1.7511e-11	2.36402e-11	1.60525e-11	1.71356e-11	1.85538e-11	3.6831e-11	1.39536e-11	1.78042e-11	1.47615e-11	4.3114e-11	1.47204e-11	1.65945e-11	1.66859e-11	1.13775e-11	1.95796e-11	1.50831e-11	1.83984e-11
25.86	1.33224e-11	1.75231e-11	2.36315e-11	1.60515e-11	1.71417e-11	1.85563e-11	3.68248e-11	1.3947e-11	1.77977e-11	1.4765e-11	4.31194e-11	1.47181e-11	1.65933e-11	1.66855e-11	1.13817e-11	1.95767e-11	1.50954e-11	1.83957e-11
25.88	1.33209e-11	1.75219e-11	2.36328e-11	1.60533e-11	1.71422e-11	1.85614e-11	3.68288e-11	1.39429e-11	1.78056e-11	1.47642e-11	4.3113e-11	1.47172e-11	1.65866e-11	1.66878e-11	1.13826e-11	1.95752e-11	1.5092e-11	1.83943e-11
25.9	1.33214e-11	1.75293e-11	2.36325e-11	1.60547e-11	1.71448e-11	1.85613e-11	3.68271e-11	1.39452e-11	1.78064e-11	1.4763e-11	4.31143e-11	1.47219e-11	1.65857e-11	1.66875e-11	1.13855e-11	1.9575e-11	1.50966e-11	1.83905e-11
25.92	1.33239e-11	1.75237e-11	2.36385e-11	1.60538e-11	1.71442e-11	1.85569e-11	3.68352e-11	1.39467e-11	1.78023e-11	1.47638e-11	4.31145e-11	1.47202e-11	1.65804e-11	1.66851e-11	1.1385e-11	1.95696e-11	1.51031e-11	1.8394e-11
25.94	1.3319e-11	1.75199e-11	2.36374e-11	1.60503e-11	1.7138e-11	1.85627e-11	3.68303e-11	1.39474e-11	1.77976e-11	1.47672e-11	4.31219e-11	1.47196e-11	1.65744e-11	1.66828e-11	1.13865e-11	1.95721e-11	1.51074e-11	1.83926e-11
25.96	1.33182e-11	1.7516e-11	2.3651e-11	1.60581e-11	1.71412e-11	1.85584e-11	3.68336e-11	1.39467e-11	1.77999e-11	1.47628e-11	4.3122e-11	1.47207e-11	1.65783e-11	1.66848e-11	1.13845e-11	1.95742e-11	1.512e-11	1.83994e-11
25.98	1.33191e-11	1.75166e-11	2.3637e-11	1.60508e-11	1.71366e-11	1.85626e-11	3.68326e-11	1.39537e-11	1.78025e-11	1.47611e-11	4.31138e-11	1.4719e-11	1.6579e-11	1.66809e-11	1.1388e-11	1.95694e-11	1.51371e-11	1.83879e-11
26	1.33192e-11	1.75143e-11	2.36357e-11	1.60529e-11	1.71389e-11	1.85572e-11	3.68216e-11	1.39505e-11	1.77954e-11	1.47675e-11	4.31181e-11	1.4718e-11	1.65746e-11	1.6682e-11	1.13838e-11	1.95741e-11	1.51494e-11	1.83958e-11
26.02	1.33247e-11	1.7518e-11	2.36489e-11	1.6055e-11	1.71399e-11	1.85636e-11	3.68323e-11	1.39496e-11	1.77969e-11	1.47607e-11	4.3096e-11	1.47191e-11	1.65819e-11	1.66851e-11	1.13845e-11	1.95757e-11	1.51649e-11	1.83962e-11
26.04	1.33186e-11	1.75268e-11	2.36427e-11	1.60499e-11	1.71408e-11	1.85606e-11	3.68328e-11	1.39458e-11	1.77959e-11	1.47615e-11	4.31079e-11	1.47216e-11	1.65792e-11	1.66844e-11	1.13869e-11	1.95639e-11	1.51838e-11	1.83918e-11
26.06	1.33207e-11	1.75205e-11	2.36407e-11	1.60482e-11	1.71469e-11	1.85623e-11	3.68318e-11	1.39501e-11	1.77984e-11	1.47646e-11	4.31092e-11	1.47182e-11	1.65821e-11	1.66811e-11	1.13863e-11	1.95633e-11	1.51904e-11	1.84002e-11
26.08	1.33259e-11	1.75224e-11	2.36434e-11	1.60563e-11	1.71433e-11	1.85597e-11	3.68388e-11	1.39501e-11	1.77916e-11	1.47638e-11	4.31279e-11	1.47208e-11	1.65731e-11	1.66826e-11	1.13891e-11	1.95747e-11	1.51972e-11	1.84021e-11
26.1	1.33251e-11	1.7518e-11	2.36362e-11	1.60552e-11	1.7145e-11	1.85601e-11	3.68349e-11	1.39464e-11	1.7799e-11	1.4762e-11	4.3117e-11	1.47179e-11	1.65749e-11	1.66839e-11	1.13898e-11	1.95666e-11	1.52e-11	1.83894e-11
26.12	1.33235e-11	1.75259e-11	2.36504e-11	1.60484e-11	1.71433e-11	1.8561e-11	3.68306e-11	1.39447e-11	1.77978e-11	1.4762e-11	4.3118e-11	1.47224e-11	1.65695e-11	1.66819e-11	1.13856e-11	1.95715e-11	1.52133e-11	1.83988e-11
26.14	1.33242e-11	1.75251e-11	2.36336e-11	1.60546e-11	1.71448e-11	1.85591e-11	3.68292e-11	1.3941e-11	1.7802e-11	1.47631e-11	4.31197e-11	1.47196e-11	1.65766e-11	1.66819e-11	1.1386e-11	1.95757e-11	1.52208e-11	1.83969e-11
26.16	1.33243e-11	1.75217e-11	2.3634e-11	1.60497e-11	1.71438e-11	1.85589e-11	3.68283e-11	1.39441e-11	1.7796e-11	1.47589e-11	4.31184e-11	1.47145e-11	1.658e-11	1.66842e-11	1.13876e-11	1.95693e-11	1.52145e-11	1.83964e-11
26.18	1.33249e-11	1.75267e-11	2.36353e-11	1.60484e-11	1.71432e-11	1.8563e-11	3.68301e-11	1.39455e-11	1.77941e-11	1.47678e-11	4.31232e-11	1.47179e-11	1.65784e-11	1.6679e-11	1.13925e-11	1.95721e-11	1.52187e-11	1.83975e-11
26.2	1.33226e-11	1.75298e-11	2.36368e-11	1.60535e-11	1.71463e-11	1.8562e-11	3.6831e-11	1.39485e-11	1.77961e-11	1.47598e-11	4.31238e-11	1.47194e-11	1.65804e-11	1.6691e-11	1.13872e-11	1.95746e-11	1.52193e-11	1.83954e-11
26.22	1.33229e-11	1.75202e-11	2.36303e-11	1.60529e-11	1.71459e-11	1.85615e-11	3.68339e-11	1.39448e-11	1.77982e-11	1.47627e-11	4.31146e-11	1.4715e-11	1.65784e-11	1.66868e-11	1.13908e-11	1.95727e-11	1.5219e-11	1.83992e-11
26.24	1.33206e-11	1.75207e-11	2.36215e-11	1.60501e-11	1.71439e-11	1.85601e-11	3.68327e-11	1.39384e-11	1.77964e-11	1.4764e-11	4.31126e-11	1.47157e-11	1.65839e-11	1.66833e-11	1.13939e-11	1.95747e-11	1.52151e-11	1.84028e-11
26.26	1.33262e-11	1.75206e-11	2.36231e-11	1.60574e-11	1.7145e-11	1.85572e-11	3.68347e-11	1.39431e-11	1.77995e-11	1.47615e-11	4.31147e-11	1.47181e-11	1.65821e-11	1.66806e-11	1.13923e-11	1.95773e-11	1.52202e-11	1.84052e-11
26.28	1.3325e-11	1.75185e-11	2.36434e-11	1.60519e-11	1.7146e-11	1.85519e-11	3.68291e-11	1.39446e-11	1.78026e-11	1.47613e-11	4.31071e-11	1.47153e-11	1.65816e-11	1.66841e-11	1.13911e-11	1.9575e-11	1.52184e-11	1.84017e-11
26.3	1.33326e-11	1.75266e-11	2.36453e-11	1.60498e-11	1.71436e-11	1.85616e-11	3.68414e-11	1.3945e-11	1.7798e-11	1.47618e-11	4.31155e-11	1.47161e-11	1.65782e-11	1.66857e-11	1.1393e-11	1.95734e-11	1.52222e-11	1.84023e-11
26.32	1.33307e-11	1.75212e-11	2.36467e-11	1.6052e-11	1.71497e-11	1.85549e-11	3.68366e-11	1.39471e-11	1.77994e-11	1.47657e-11	4.3108e-11	1.47162e-11	1.65797e-11	1.66908e-11	1.13897e-11	1.95734e-11	1.52173e-11	1.83977e-11
26.34	1.33274e-11	1.75218e-11	2.36559e-11	1.60537e-11	1.71443e-11	1.85584e-11	3.68342e-11	1.39459e-11	1.78e-11	1.4762e-11	4.31223e-11	1.47139e-11	1.65808e-11	1.66911e-11	1.13934e-11	1.95751e-11	1.52161e-11	1.8401e-11
26.36	1.33273e-11	1.75304e-11	2.36591e-11	1.60481e-11	1.71435e-11	1.85571e-11	3.68297e-11	1.39467e-11	1.77999e-11	1.47616e-11	4.31234e-11	1.47178e-11	1.65814e-11	1.66847e-11	1.13907e-11	1.95733e-11	1.52172e-11	1.83929e-11
26.38	1.33274e-11	1.75161e-11	2.36493e-11	1.60509e-11	1.71484e-11	1.85575e-11	3.68319e-11	1.39477e-11	1.77957e-11	1.47648e-11	4.3108e-11	1.47185e-11	1.65885e-11	1.6691e-11	1.13922e-11	1.95789e-11	1.5214e-11	1.8397e-11
26.4	1.33279e-11	1.75229e-11	2.36575e-11	1.60542e-11	1.71445e-11	1.85632e-11	3.68351e-11	1.39481e-11	1.77948e-11	1.47637e-11	4.30933e-11	1.47162e-11	1.65777e-11	1.66838e-11	1.13885e-11	1.95718e-11	1.52113e-11	1.83999e-11
26.42	1.33263e-11	1.75263e-11	2.36512e-11	1.60522e-11	1.71461e-11	1.8567e-11	3.6835e-11	1.3942e-11	1.77916e-11	1.47623e-11	4.31218e-11	1.47185e-11	1.65847e-11	1.66903e-11	1.13884e-11	1.95752e-11	1.52126e-11	1.83942e-11
26.44	1.33235e-11	1.75187e-11	2.36444e-11	1.6052e-11	1.71477e-11	1.85616e-11	3.68331e-11	1.3943e-11	1.77914e-11	1.47587e-11	4.31144e-11	1.47123e-11	1.65841e-11	1.66879e-11	1.13955e-11	1.95773e-11	1.52027e-11	1.83983e-11
26.46	1.33295e-11	1.75189e-11	2.36423e-11	1.60472e-11	1.71429e-11	1.85569e-11	3.68296e-11	1.39446e-11	1.77942e-11	1.47641e-11	4.31109e-11	1.47173e-11	1.65845e-11	1.66793e-11	1.13933e-11	1.95724e-11	1.52084e-11	1.84003e-11
26.48	1.33308e-11	1.75241e-11	2.36377e-11	1.60518e-11	1.71461e-11	1.85601e-11	3.68321e-11	1.39403e-11	1.77984e-11	1.47654e-11	4.31058e-11	1.47153e-11	1.6586e-11	1.66826e-11	1.13893e-11	1.95723e-11	1.52034e-11	1.83931e-11
26.5	1.33291e-11	1.75259e-11	2.36381e-11	1.60503e-11	1.71458e-11	1.85646e-11	3.68352e-11	1.39423e-11	1.7792e-11	1.47635e-11	4.31195e-11	1.4718e-11	1.65878e-11	1.66793e-11	1.1393e-11	1.95796e-11	1.52038e-11	1.84013e-11
26.52	1.33236e-11	1.75275e-11	2.36412e-11	1.60599e-11	1.71478e-11	1.85533e-11	3.68338e-11	1.39413e-11	1.77894e-11	1.47658e-11	4.31115e-11	1.47128e-11	1.65856e-11	1.6683e-11	1.13909e-11	1.95743e-11	1.52055e-11	1.84006e-11
26.54	1.33234e-11	1.75217e-11	2.36409e-11	1.60521e-11	1.71417e-11	1.85547e-11	3.68346e-11	1.39462e-11	1.77923e-11	1.47622e-11	4.31349e-11	1.47182e-11	1.6583e-11	1.66856e-11	1.13924e-11	1.95776e-11	1.52026e-11	1.83999e-11
26.56	1.33268e-11	1.75241e-11	2.36356e-11	1.60457e-11	1.71491e-11	1.85549e-11	3.68284e-11	1.3941e-11	1.77939e-11	1.47678e-11	4.31212e-11	1.47138e-11	1.65821e-11	1.66828e-11	1.13918e-11	1.95778e-11	1.52053e-11	1.83974e-11
26.58	1.33272e-11	1.75199e-11	2.36457e-11	1.60552e-11	1.71461e-11	1.85458e-11	3.68337e-11	1.39376e-11	1.77935e-11	1.47626e-11	4.31064e-11	1.47137e-11	1.65799e-11	1.6678e-11	1.13971e-11	1.95777e-11	1.52008e-11	1.83968e-11
26.6	1.33295e-11	1.75338e-11	2.36368e-11	1.60478e-11	1.71452e-11	1.85514e-11	3.6825e-11	1.39345e-11	1.77969e-11	1.47614e-11	4.31087e-11	1.47208e-11	1.65837e-11	1.66847e-11	1.13898e-11	1.95746e-11	1.52021e-11	1.84007e-11
26.62	1.333e-11	1.75312e-11	2.36314e-11	1.60458e-11	1.71442e-11	1.8551e-11	3.68326e-11	1.39379e-11	1.77919e-11	1.47618e-11	4.31149e-11	1.47134e-11	1.65816e-11	1.66863e-11	1.13932e-11	1.95799e-11	1.52026e-11	1.8403e-11
26.64	1.33236e-11	1.75324e-11	2.36409e-11	1.60538e-11	1.71456e-11	1.85492e-11	3.68313e-11	1.39395e-11	1.77933e-11	1.47554e-11	4.3111e-11	1.47189e-11	1.6586e-11	1.66884e-11	1.13995e-11	1.95738e-11	1.5203e-11	1.83939e-11
26.66	1.33252e-11	1.75243e-11	2.36294e-11	1.60494e-11	1.71374e-11	1.85511e-11	3.68342e-11	1.39355e-11	1.77924e-11	1.47634e-11	4.311e-11	1.47205e-11	1.65791e-11	1.66892e-11	1.13901e-11	1.95781e-11	1.52072e-11	1.84007e-11
26.68	1.33298e-11	1.75299e-11	2.36421e-11	1.6054e-11	1.71416e-11	1.85514e-11	3.6839e-11	1.39473e-11	1.77906e-11	1.47584e-11	4.31175e-11	1.47144e-11	1.65802e-11	1.66864e-11	1.13957e-11	1.95828e-11	1.52024e-11	1.83944e-11
26.7	1.33306e-11	1.75367e-11	2.3638e-11	1.60535e-11	1.71455e-11	1.85481e-11	3.68282e-11	1.39406e-11	1.77891e-11	1.47614e-11	4.31145e-11	1.47209e-11	1.65787e-11	1.66851e-11	1.1399e-11	1.9579e-11	1.52065e-11	1.84029e-11
26.72	1.33343e-11	1.75233e-11	2.36345e-11	1.60493e-11	1.71455e-11	1.8557e-11	3.68358e-11	1.3939e-11	1.77879e-11	1.47632e-11	4.31138e-11	1.47188e-11	1.65803e-11	1.66821e-11	1.13952e-11	1.95752e-11	1.52022e-11	1.84011e-11
26.74	1.3326e-11	1.75394e-11	2.36353e-11	1.60538e-11	1.71449e-11	1.85542e-11	3.68291e-11	1.39327e-11	1.77909e-11	1.47615e-11	4.31141e-11	1.47176e-11	1.65818e-11	1.66873e-11	1.13936e-11	1.95794e-11	1.52022e-11	1.84025e-11
26.76	1.33279e-11	1.75281e-11	2.36521e-11	1.6053e-11	1.71441e-11	1.85531e-11	3.68285e-11	1.39338e-11	1.77883e-11	1.47634e-11	4.31019e-11	1.47214e-11	1.65831e-11	1.66831e-11	1.13896e-11	1.95776e-11	1.51999e-11	1.84027e-11
26.78	1.33308e-11	1.75281e-11	2.36418e-11	1.60509e-11	1.71415e-11	1.85506e-11	3.68313e-11	1.39306e-11	1.77906e-11	1.47622e-11	4.31078e-11	1.47097e-11	1.65798e-11	1.66848e-11	1.13928e-11	1.9577e-11	1.52038e-11	1.83987e-11
26.8	1.33281e-11	1.75276e-11	2.36491e-11	1.60523e-11	1.71422e-11	1.85524e-11	3.68286e-11	1.39337e-11	1.77847e-11	1.47592e-11	4.31079e-11	1.47143e-11	1.65794e-11	1.66812e-11	1.13899e-11	1.95771e-11	1.52035e-11	1.84024e-11
26.82	1.33293e-11	1.75322e-11	2.36452e-11	1.60561e-11	1.71441e-11	1.8557e-11	3.68306e-11	1.39298e-11	1.77889e-11	1.47619e-11	4.31243e-11	1.47188e-11	1.6577e-11	1.66872e-11	1.13942e-11	1.95735e-11	1.52026e-11	1.83933e-11
26.84	1.33336e-11	1.75371e-11	2.36413e-11	1.60486e-11	1.71465e-11	1.85503e-11	3.68267e-11	1.39286e-11	1.77855e-11	1.47615e-11	4.31162e-11	1.47167e-11	1.65771e-11	1.66817e-11	1.13941e-11	1.95746e-11	1.51998e-11	1.83946e-11
26.86	1.33344e-11	1.75301e-11	2.36375e-11	1.60509e-11	1.71407e-11	1.855e-11	3.68339e-11	1.3925e-11	1.77866e-11	1.47643e-11	4.31197e-11	1.47185e-11	1.65812e-11	1.66877e-11	1.13898e-11	1.9578e-11	1.52018e-11	1.84003e-11
26.88	1.33321e-11	1.75288e-11	2.36527e-11	1.60539e-11	1.7146e-11	1.85504e-11	3.68337e-11	1.3941e-11	1.77828e-11	1.47667e-11	4.31148e-11	1.47164e-11	1.65761e-11	1.66829e-11	1.13908e-11	1.95792e-11	1.52038e-11	1.8403e-11
26.9	1.33321e-11	1.753e-11	2.36374e-11	1.605e-11	1.71461e-11	1.85511e-11	3.68282e-11	1.39419e-11	1.77882e-11	1.47638e-11	4.31174e-11	1.47215e-11	1.65705e-11	1.66901e-11	1.13913e-11	1.95806e-11	1.52003e-11	1.83929e-11
26.92	1.33339e-11	1.75284e-11	2.36411e-11	1.60462e-11	1.71473e-11	1.8547e-11	3.68334e-11	1.3936e-11	1.77858e-11	1.47656e-11	4.31243e-11	1.4718e-11	1.65659e-11	1.66858e-11	1.13962e-11	1.95802e-11	1.52095e-11	1.83934e-11
26.94	1.33331e-11	1.75289e-11	2.36459e-11	1.6053e-11	1.71414e-11	1.85554e-11	3.68331e-11	1.39352e-11	1.7789e-11	1.47655e-11	4.31086e-11	1.47086e-11	1.6568e-11	1.66841e-11	1.13942e-11	1.95755e-11	1.52023e-11	1.8403e-11
26.96	1.33276e-11	1.75321e-11	2.3646e-11	1.60502e-11	1.71439e-11	1.85515e-11	3.68306e-11	1.3936e-11	1.77886e-11	1.47622e-11	4.31023e-11	1.47139e-11	1.65638e-11	1.66784e-11	1.13937e-11	1.9578e-11	1.5202e-11	1.84023e-11
26.98	1.33349e-11	1.75307e-11	2.36483e-11	1.60496e-11	1.71453e-11	1.8551e-11	3.68294e-11	1.3931e-11	1.77861e-11	1.4764e-11	4.3104e-11	1.47165e-11	1.65639e-11	1.66858e-11	1.13934e-11	1.9579e-11	1.52043e-11	1.83962e-11
27	1.33288e-11	1.75345e-11	2.36369e-11	1.60531e-11	1.71438e-11	1.85494e-11	3.68331e-11	1.39379e-11	1.77896e-11	1.47659e-11	4.31078e-11	1.47138e-11	1.65576e-11	1.66847e-11	1.13981e-11	1.95771e-11	1.52023e-11	1.84144e-11
27.02	1.33249e-11	1.75344e-11	2.36353e-11	1.60566e-11	1.71416e-11	1.8542e-11	3.68276e-11	1.39333e-11	1.77881e-11	1.4768e-11	4.31141e-11	1.47105e-11	1.65554e-11	1.66839e-11	1.13965e-11	1.95809e-11	1.52034e-11	1.83953e-11
27.04	1.33246e-11	1.75342e-11	2.364e-11	1.60498e-11	1.71483e-11	1.85488e-11	3.68239e-11	1.39418e-11	1.77933e-11	1.47624e-11	4.31226e-11	1.47147e-11	1.65548e-11	1.6681e-11	1.13993e-11	1.95808e-11	1.52006e-11	1.83917e-11
27.06	1.33296e-11	1.75383e-11	2.36374e-11	1.605e-11	1.71489e-11	1.85482e-11	3.68215e-11	1.39363e-11	1.77905e-11	1.47608e-11	4.31066e-11	1.47157e-11	1.65503e-11	1.66853e-11	1.13943e-11	1.95788e-11	1.52058e-11	1.84039e-11
27.08	1.3335e-11	1.75349e-11	2.36391e-11	1.60507e-11	1.71454e-11	1.85561e-11	3.68217e-11	1.39425e-11	1.77862e-11	1.47614e-11	4.31045e-11	1.47109e-11	1.65574e-11	1.66859e-11	1.13995e-11	1.9579e-11	1.52032e-11	1.84011e-11
27.1	1.33316e-11	1.75279e-11	2.36366e-11	1.60488e-11	1.71433e-11	1.85449e-11	3.68235e-11	1.39382e-11	1.77881e-11	1.47651e-11	4.31091e-11	1.47155e-11	1.65521e-11	1.66876e-11	1.13969e-11	1.95803e-11	1.52005e-11	1.83985e-11
27.12	1.33276e-11	1.75301e-11	2.36314e-11	1.60546e-11	1.71431e-11	1.85493e-11	3.68246e-11	1.39331e-11	1.77871e-11	1.47665e-11	4.31238e-11	1.47114e-11	1.65564e-11	1.66832e-11	1.13975e-11	1.95816e-11	1.5207e-11	1.83971e-11
27.14	1.33305e-11	1.75345e-11	2.36392e-11	1.60514e-11	1.71402e-11	1.85513e-11	3.68277e-11	1.3935e-11	1.77855e-11	1.47616e-11	4.31255e-11	1.47113e-11	1.65538e-11	1.66813e-11	1.14001e-11	1.95796e-11	1.52037e-11	1.84016e-11
27.16	1.3325e-11	1.7529e-11	2.36401e-11	1.60535e-11	1.7147e-11	1.85514e-11	3.68287e-11	1.39403e-11	1.77858e-11	1.47622e-11	4.31196e-11	1.47127e-11	1.65655e-11	1.66828e-11	1.13988e-11	1.95823e-11	1.52013e-11	1.84022e-11
27.18	1.33236e-11	1.75332e-11	2.36301e-11	1.60503e-11	1.71407e-11	1.85487e-11	3.68237e-11	1.39356e-11	1.77882e-11	1.47655e-11	4.31098e-11	1.47116e-11	1.65569e-11	1.66838e-11	1.14e-11	1.95814e-11	1.52042e-11	1.84025e-11
27.2	1.33261e-11	1.75324e-11	2.36465e-11	1.60537e-11	1.7142e-11	1.85507e-11	3.6818e-11	1.39424e-11	1.77884e-11	1.47656e-11	4.31053e-11	1.47162e-11	1.65546e-11	1.66825e-11	1.13906e-11	1.95775e-11	1.52003e-11	1.83991e-11
27.22	1.33276e-11	1.75431e-11	2.36479e-11	1.60522e-11	1.71457e-11	1.85553e-11	3.68189e-11	1.39375e-11	1.77895e-11	1.47671e-11	4.31106e-11	1.47117e-11	1.65572e-11	1.669e-11	1.13981e-11	1.95826e-11	1.52028e-11	1.83974e-11
27.24	1.33312e-11	1.75332e-11	2.36446e-11	1.60527e-11	1.71421e-11	1.8552e-11	3.68238e-11	1.39417e-11	1.7788e-11	1.47625e-11	4.31219e-11	1.47166e-11	1.65548e-11	1.66872e-11	1.14001e-11	1.9578e-11	1.52048e-11	1.84032e-11
27.26	1.33321e-11	1.75307e-11	2.36379e-11	1.60478e-11	1.7144e-11	1.85487e-11	3.6822e-11	1.39369e-11	1.77896e-11	1.47625e-11	4.31121e-11	1.47181e-11	1.65538e-11	1.66878e-11	1.13951e-11	1.95764e-11	1.52052e-11	1.8402e-11
27.28	1.33337e-11	1.75292e-11	2.36552e-11	1.60516e-11	1.7149e-11	1.85497e-11	3.6815e-11	1.39432e-11	1.77873e-11	1.47616e-11	4.31174e-11	1.47103e-11	1.65589e-11	1.66866e-11	1.13981e-11	1.95799e-11	1.52005e-11	1.84027e-11
27.3	1.33328e-11	1.75395e-11	2.36527e-11	1.60546e-11	1.71442e-11	1.85464e-11	3.68194e-11	1.39429e-11	1.77843e-11	1.47597e-11	4.31161e-11	1.47141e-11	1.65566e-11	1.66893e-11	1.14008e-11	1.9579e-11	1.52042e-11	1.83929e-11
27.32	1.33354e-11	1.7531e-11	2.36591e-11	1.60459e-11	1.7148e-11	1.8553e-11	3.68154e-11	1.39413e-11	1.7786e-11	1.47583e-11	4.3117e-11	1.4714e-11	1.65581e-11	1.66834e-11	1.14007e-11	1.95833e-11	1.52043e-11	1.84072e-11
27.34	1.33307e-11	1.75271e-11	2.36667e-11	1.60487e-11	1.715e-11	1.8551e-11	3.68071e-11	1.39402e-11	1.77889e-11	1.4758e-11	4.31347e-11	1.47113e-11	1.65518e-11	1.66881e-11		1.95808e-11	1.52067e-11	1.84009e-11
27.36	1.33311e-11	1.75363e-11	2.36637e-11	1.60555e-11	1.71451e-11	1.85523e-11	3.68116e-11	1.39422e-11	1.77825e-11	1.4767e-11	4.3105e-11	1.4716e-11	1.65554e-11	1.66903e-11		1.9581e-11	1.52098e-11	1.84031e-11
27.38	1.33263e-11	1.75297e-11	2.36585e-11	1.60564e-11	1.71433e-11	1.85523e-11	3.68188e-11	1.3943e-11	1.77924e-11	1.47636e-11	4.31131e-11	1.47118e-11	1.6554e-11	1.66864e-11		1.95848e-11	1.52103e-11	1.83961e-11
27.4	1.33265e-11	1.75357e-11	2.36474e-11	1.60522e-11	1.71516e-11	1.85517e-11	3.6822e-11	1.39416e-11	1.77863e-11	1.47664e-11	4.31144e-11	1.47092e-11	1.65557e-11	1.66876e-11		1.9582e-11	1.52162e-11	1.84048e-11
27.42	1.33307e-11	1.7531e-11	2.36599e-11	1.60549e-11	1.71517e-11	1.85485e-11	3.68197e-11	1.39436e-11	1.77857e-11	1.47634e-11	4.31063e-11	1.47107e-11	1.65593e-11	1.66876e-11		1.95869e-11	1.52087e-11	1.83961e-11
27.44	1.33321e-11	1.75325e-11	2.3654e-11	1.60489e-11	1.71472e-11	1.85474e-11	3.68175e-11	1.39381e-11	1.77832e-11	1.47642e-11	4.31052e-11	1.47152e-11	1.65601e-11	1.66868e-11		1.95863e-11	1.5211e-11	1.83939e-11
27.46	1.33267e-11	1.75377e-11	2.36528e-11	1.60514e-11	1.71467e-11	1.8547e-11	3.68199e-11	1.39435e-11	1.77926e-11	1.47686e-11	4.31216e-11	1.47092e-11	1.6551e-11	1.66846e-11		1.95821e-11	1.52089e-11	1.8399e-11
27.48	1.33304e-11	1.75393e-11	2.36468e-11	1.60437e-11	1.71439e-11	1.85521e-11	3.68234e-11	1.39418e-11	1.77839e-11	1.47658e-11	4.31101e-11	1.47104e-11	1.65558e-11	1.66884e-11		1.95863e-11	1.52101e-11	1.83988e-11
27.5	1.33388e-11	1.75314e-11	2.36487e-11	1.60522e-11	1.7142e-11	1.85479e-11	3.68197e-11	1.3942e-11	1.77864e-11	1.47624e-11	4.31133e-11	1.47092e-11	1.65568e-11	1.66873e-11		1.95863e-11	1.521e-11	1.83981e-11
27.52	1.33357e-11	1.75327e-11	2.36514e-11	1.6052e-11	1.71447e-11	1.85478e-11	3.6818e-11	1.3942e-11	1.77844e-11	1.47643e-11	4.31197e-11	1.47154e-11	1.65539e-11	1.66892e-11		1.95853e-11	1.52004e-11	1.83955e-11
27.54	1.33321e-11	1.75159e-11	2.36536e-11	1.60496e-11	1.71432e-11	1.85476e-11	3.68174e-11	1.39418e-11	1.77873e-11	1.47625e-11	4.31339e-11	1.47078e-11	1.65548e-11	1.66848e-11		1.95828e-11	1.52134e-11	1.83916e-11
27.56	1.33327e-11	1.75303e-11	2.36462e-11	1.60571e-11	1.71454e-11	1.85499e-11	3.68206e-11	1.39392e-11	1.7785e-11	1.47627e-11	4.3117e-11	1.47099e-11	1.65561e-11	1.66844e-11		1.95834e-11	1.52052e-11	1.83941e-11
27.58	1.33431e-11	1.75297e-11	2.36436e-11	1.60485e-11	1.71451e-11	1.85508e-11	3.6819e-11	1.39445e-11	1.77905e-11	1.47618e-11	4.31433e-11	1.47117e-11	1.65581e-11	1.6686e-11		1.95824e-11	1.52019e-11	1.83945e-11
27.6	1.33434e-11	1.75211e-11	2.36455e-11	1.60495e-11	1.71504e-11	1.85502e-11	3.68206e-11	1.39451e-11	1.77868e-11	1.47627e-11	4.31303e-11	1.47143e-11	1.65614e-11	1.66813e-11		1.9584e-11	1.52057e-11	1.84012e-11
27.62	1.33545e-11	1.75217e-11	2.36406e-11	1.60455e-11	1.71434e-11	1.85511e-11	3.68218e-11	1.39357e-11	1.7786e-11	1.47619e-11	4.31248e-11	1.47098e-11	1.65559e-11	1.66854e-11		1.95785e-11	1.52057e-11	1.83973e-11
27.64	1.33571e-11	1.75279e-11	2.36554e-11	1.60516e-11	1.71468e-11	1.85525e-11	3.68208e-11	1.39412e-11	1.77873e-11	1.47635e-11	4.31198e-11	1.47104e-11	1.65549e-11	1.66801e-11		1.95851e-11	1.52032e-11	1.83962e-11
27.66	1.33669e-11	1.75195e-11	2.36559e-11	1.60516e-11	1.71478e-11	1.85499e-11	3.68148e-11	1.39447e-11	1.77866e-11	1.47593e-11	4.31162e-11	1.47097e-11	1.65622e-11	1.66844e-11		1.95826e-11	1.52058e-11	1.84026e-11
27.68	1.33786e-11	1.75078e-11	2.36528e-11	1.60524e-11	1.71424e-11	1.85521e-11	3.68144e-11	1.39478e-11	1.77898e-11	1.4763e-11	4.31128e-11	1.47159e-11	1.65528e-11	1.66854e-11		1.95861e-11	1.52074e-11	1.84012e-11
27.7	1.33703e-11	1.75162e-11	2.36615e-11	1.60501e-11	1.71457e-11	1.8553e-11	3.68214e-11	1.39494e-11	1.77851e-11	1.47665e-11	4.31117e-11	1.47068e-11	1.656e-11	1.66805e-11		1.95825e-11	1.5207e-11	1.83956e-11
27.72	1.33819e-11	1.75151e-11	2.36633e-11	1.60492e-11	1.71455e-11	1.85482e-11	3.6819e-11	1.39402e-11	1.77818e-11	1.47664e-11	4.31226e-11	1.4713e-11	1.65551e-11	1.66834e-11		1.9581e-11	1.52113e-11	1.84002e-11
27.74	1.3389e-11	1.7521e-11	2.36688e-11	1.60489e-11	1.71512e-11	1.85455e-11	3.68186e-11	1.39474e-11	1.77826e-11	1.47655e-11	4.31136e-11	1.47084e-11	1.6561e-11	1.66829e-11		1.95833e-11	1.52182e-11	1.8403e-11
27.76	1.33927e-11	1.75102e-11	2.36503e-11	1.60513e-11	1.71432e-11	1.85545e-11	3.68165e-11	1.39438e-11	1.7787e-11	1.47559e-11	4.31237e-11	1.47102e-11	1.65578e-11	1.66869e-11		1.95835e-11	1.52129e-11	1.84005e-11
27.78	1.33913e-11	1.75182e-11	2.36555e-11	1.60517e-11	1.71453e-11	1.8552e-11	3.68183e-11	1.39475e-11	1.77832e-11	1.47632e-11	4.31254e-11	1.47108e-11	1.65557e-11	1.66809e-11		1.95811e-11	1.52113e-11	1.84016e-11
27.8	1.33951e-11	1.75127e-11	2.36502e-11	1.60575e-11	1.71463e-11	1.85513e-11	3.68182e-11	1.39501e-11	1.77878e-11	1.47629e-11	4.31216e-11	1.47104e-11	1.65519e-11	1.66846e-11		1.95809e-11	1.5208e-11	1.84023e-11
27.82	1.33954e-11	1.75216e-11	2.36544e-11	1.60486e-11	1.71451e-11	1.85521e-11	3.68231e-11	1.39469e-11	1.77877e-11	1.47645e-11	4.31157e-11	1.47091e-11	1.65548e-11	1.668e-11		1.95804e-11	1.52105e-11	1.83975e-11
27.84	1.34024e-11	1.75188e-11	2.36565e-11	1.60438e-11	1.71472e-11	1.85502e-11	3.68252e-11	1.39397e-11	1.77866e-11	1.47642e-11	4.31182e-11	1.47076e-11	1.65636e-11	1.66861e-11		1.95799e-11	1.52147e-11	1.83971e-11
27.86	1.34065e-11	1.75231e-11	2.36606e-11	1.60552e-11	1.71432e-11	1.855e-11	3.68237e-11	1.39386e-11	1.77877e-11	1.47647e-11	4.31198e-11	1.4708e-11	1.65617e-11	1.6687e-11		1.95792e-11	1.52104e-11	1.83996e-11
27.88	1.34043e-11	1.75155e-11	2.36571e-11	1.6055e-11	1.71464e-11	1.85472e-11	3.6817e-11	1.39432e-11	1.77904e-11	1.47616e-11	4.31068e-11	1.47143e-11	1.65567e-11	1.66842e-11		1.95865e-11	1.5207e-11	1.83978e-11
27.9	1.34104e-11	1.7528e-11	2.36501e-11	1.60495e-11	1.71437e-11	1.85508e-11	3.68174e-11	1.39359e-11	1.77854e-11	1.47631e-11	4.31124e-11	1.47047e-11	1.65524e-11	1.66858e-11		1.95853e-11	1.52125e-11	1.84026e-11
27.92	1.34089e-11	1.75273e-11	2.36506e-11	1.60523e-11	1.71465e-11	1.85466e-11	3.68218e-11	1.39462e-11	1.77903e-11	1.47603e-11	4.3133e-11	1.4708e-11	1.6554e-11	1.66931e-11		1.95804e-11	1.52137e-11	1.83998e-11
27.94	1.33989e-11	1.75277e-11	2.36535e-11	1.60541e-11	1.7148e-11	1.85422e-11	3.68162e-11	1.39424e-11	1.77858e-11	1.4756e-11	4.31116e-11	1.47099e-11	1.65557e-11	1.66869e-11		1.95817e-11	1.52138e-11	1.83981e-11
27.96	1.34004e-11	1.75222e-11	2.36472e-11	1.60557e-11	1.71485e-11	1.85505e-11	3.68235e-11	1.3943e-11	1.77895e-11	1.47617e-11	4.31134e-11	1.47144e-11	1.65544e-11	1.66878e-11		1.95858e-11	1.52123e-11	1.84073e-11
27.98	1.34059e-11	1.75234e-11	2.36526e-11	1.60506e-11	1.71441e-11	1.85514e-11	3.6822e-11	1.39476e-11	1.7786e-11	1.47588e-11	4.31074e-11	1.47128e-11	1.65572e-11	1.66835e-11		1.95833e-11	1.52114e-11	1.83972e-11
28	1.34016e-11	1.75176e-11	2.36498e-11	1.60476e-11	1.71485e-11	1.85488e-11	3.68173e-11	1.3943e-11	1.7789e-11	1.4761e-11	4.31264e-11	1.4713e-11	1.65529e-11	1.66881e-11		1.95883e-11	1.52087e-11	1.8404e-11
28.02	1.34048e-11	1.75217e-11	2.36558e-11	1.60464e-11	1.71464e-11	1.85523e-11	3.68215e-11	1.39424e-11	1.77909e-11	1.47683e-11	4.31218e-11	1.47079e-11	1.65544e-11	1.66837e-11		1.95848e-11	1.5216e-11	1.84016e-11
28.04	1.33991e-11	1.75284e-11	2.36682e-11	1.60535e-11	1.71476e-11	1.85481e-11	3.682e-11	1.39414e-11	1.77892e-11	1.47648e-11	4.3102e-11	1.47109e-11	1.6555e-11	1.66836e-11		1.95802e-11		1.84039e-11
28.06	1.3407e-11	1.7523e-11	2.36585e-11	1.60457e-11	1.71479e-11	1.85462e-11	3.68242e-11	1.39461e-11	1.77855e-11	1.47645e-11	4.31176e-11	1.47072e-11	1.65575e-11	1.66866e-11		1.95818e-11		1.83919e-11
28.08	1.34114e-11	1.75235e-11	2.3664e-11	1.60462e-11	1.71474e-11	1.85493e-11	3.68227e-11	1.39428e-11	1.77897e-11	1.47659e-11	4.31247e-11	1.4711e-11	1.6555e-11	1.66868e-11		1.95864e-11		1.8392e-11
28.1	1.34089e-11	1.75225e-11	2.36723e-11	1.60535e-11	1.71432e-11	1.85518e-11	3.68114e-11	1.39447e-11	1.77898e-11	1.47646e-11	4.31456e-11	1.47062e-11	1.65542e-11	1.66903e-11		1.95862e-11		1.83996e-11
28.12	1.34114e-11	1.75231e-11	2.36724e-11	1.6054e-11	1.71465e-11	1.85504e-11	3.6819e-11	1.39391e-11	1.77826e-11	1.47634e-11	4.3121e-11	1.4709e-11	1.65535e-11	1.66835e-11		1.95823e-11		1.83968e-11
28.14	1.34094e-11	1.75169e-11	2.36648e-11	1.60506e-11	1.71507e-11	1.8554e-11	3.68196e-11	1.39507e-11	1.77923e-11	1.47612e-11	4.31246e-11	1.47118e-11	1.65584e-11	1.66853e-11		1.95846e-11		1.83955e-11
28.16	1.34092e-11	1.75246e-11	2.36676e-11	1.60546e-11	1.71475e-11	1.85504e-11	3.68186e-11	1.3941e-11	1.77833e-11	1.47643e-11	4.31152e-11	1.47097e-11	1.65549e-11	1.66842e-11		1.95805e-11		1.84001e-11
28.18	1.34112e-11	1.75249e-11	2.36708e-11	1.60525e-11	1.71449e-11	1.85516e-11	3.68179e-11	1.39464e-11	1.77913e-11	1.47614e-11	4.3122e-11	1.4712e-11	1.65554e-11	1.66899e-11		1.95839e-11		1.83952e-11
28.2	1.34103e-11	1.75243e-11	2.367e-11	1.60496e-11	1.71497e-11	1.85482e-11	3.68123e-11	1.39456e-11	1.77848e-11	1.47628e-11	4.31188e-11	1.47095e-11	1.65569e-11	1.66853e-11		1.95796e-11		1.83964e-11
28.22	1.34124e-11	1.7523e-11	2.36586e-11	1.60474e-11	1.71539e-11	1.85483e-11	3.68228e-11	1.3947e-11	1.77829e-11	1.47631e-11	4.31127e-11	1.47087e-11	1.65576e-11	1.66866e-11		1.95846e-11		1.8394e-11
28.24	1.34098e-11	1.75228e-11	2.36565e-11	1.60542e-11	1.71496e-11	1.85487e-11	3.68236e-11	1.39486e-11	1.7784e-11	1.47625e-11	4.31161e-11	1.47083e-11	1.65537e-11	1.66865e-11		1.9587e-11		1.84003e-11
28.26	1.3413e-11	1.75205e-11	2.36662e-11	1.60501e-11	1.7152e-11	1.85513e-11	3.6822e-11	1.39485e-11	1.77825e-11	1.47596e-11	4.31149e-11	1.47113e-11	1.65541e-11	1.66881e-11		1.95851e-11		1.83968e-11
28.28	1.34142e-11	1.75237e-11	2.36602e-11	1.60498e-11	1.71427e-11	1.85521e-11	3.68236e-11	1.39419e-11	1.7786e-11	1.47603e-11	4.31203e-11	1.47072e-11	1.65534e-11	1.66832e-11		1.95799e-11		1.83907e-11
28.3	1.3411e-11	1.75278e-11	2.36542e-11	1.60574e-11	1.71479e-11	1.8551e-11	3.68238e-11	1.39399e-11	1.77858e-11	1.47608e-11	4.31055e-11	1.47114e-11	1.6555e-11	1.66852e-11		1.95853e-11		1.8397e-11
28.32	1.34112e-11	1.75167e-11	2.36627e-11	1.60554e-11	1.71479e-11	1.855e-11	3.68232e-11	1.39444e-11	1.77883e-11	1.47646e-11	4.31166e-11	1.4708e-11	1.65519e-11	1.66839e-11		1.95845e-11		1.83929e-11
28.34	1.34137e-11	1.75312e-11	2.36658e-11	1.60456e-11	1.71483e-11	1.85524e-11	3.68271e-11	1.395e-11	1.77858e-11	1.47644e-11	4.31216e-11	1.47083e-11	1.65584e-11	1.66825e-11		1.9583e-11		1.83998e-11
28.36	1.3407e-11	1.75208e-11	2.36605e-11	1.60514e-11	1.7149e-11	1.85491e-11	3.68237e-11	1.39472e-11	1.77871e-11	1.4767e-11	4.31261e-11	1.47134e-11	1.65581e-11	1.66839e-11		1.95891e-11		1.8398e-11
28.38	1.3413e-11	1.75214e-11	2.36632e-11	1.60501e-11	1.71476e-11	1.85509e-11	3.68282e-11	1.39464e-11	1.77852e-11	1.47649e-11	4.31212e-11	1.47103e-11	1.65545e-11	1.66887e-11		1.95855e-11		1.83956e-11
28.4	1.34113e-11	1.75239e-11	2.36579e-11	1.60441e-11	1.71443e-11	1.85492e-11	3.68199e-11	1.39435e-11	1.77873e-11	1.47671e-11	4.31247e-11	1.47091e-11	1.65508e-11	1.66857e-11		1.95904e-11		1.83993e-11
28.42	1.3417e-11	1.75125e-11	2.36441e-11	1.60529e-11	1.71468e-11	1.85561e-11	3.68249e-11	1.39478e-11	1.77852e-11	1.47618e-11	4.31378e-11	1.47115e-11	1.65528e-11	1.66878e-11		1.9585e-11		1.8402e-11
28.44	1.34088e-11	1.75209e-11	2.36376e-11	1.60498e-11	1.7144e-11	1.85476e-11	3.68242e-11	1.39443e-11	1.77881e-11	1.47616e-11	4.31226e-11	1.47102e-11	1.65516e-11	1.66855e-11		1.95851e-11		1.83998e-11
28.46	1.34137e-11	1.75225e-11	2.36562e-11	1.60535e-11	1.71497e-11	1.8543e-11	3.68235e-11	1.39387e-11	1.77861e-11	1.47638e-11	4.31413e-11	1.47099e-11	1.65507e-11	1.66868e-11		1.95812e-11		1.83949e-11
28.48	1.34127e-11	1.75126e-11	2.36453e-11	1.60518e-11	1.71466e-11	1.85354e-11	3.6823e-11	1.39485e-11	1.77841e-11	1.47664e-11	4.31262e-11	1.47127e-11	1.65521e-11	1.66879e-11		1.95881e-11		1.83935e-11
28.5	1.34133e-11	1.75091e-11	2.36544e-11	1.60485e-11	1.71506e-11	1.85409e-11	3.6823e-11	1.39393e-11	1.77901e-11	1.47703e-11	4.31265e-11	1.47185e-11	1.6562e-11	1.66886e-11		1.95877e-11		1.83945e-11
28.52	1.34177e-11	1.75167e-11	2.36562e-11	1.60474e-11	1.71494e-11	1.85377e-11	3.68222e-11	1.3946e-11	1.779e-11	1.47624e-11	4.31257e-11	1.47096e-11	1.65536e-11	1.66888e-11		1.95885e-11		1.83938e-11
28.54	1.342e-11	1.75208e-11	2.36527e-11	1.60532e-11	1.7151e-11	1.85395e-11	3.68153e-11	1.39428e-11	1.77877e-11	1.4758e-11	4.31429e-11	1.47129e-11	1.65499e-11	1.66849e-11		1.95809e-11		1.83956e-11
28.56	1.34212e-11	1.75118e-11	2.36581e-11	1.6051e-11	1.71495e-11	1.85454e-11	3.68197e-11	1.39399e-11	1.77856e-11	1.47636e-11	4.31285e-11	1.47116e-11	1.65485e-11	1.66765e-11		1.95882e-11		1.83945e-11
28.58	1.3417e-11	1.75103e-11	2.36458e-11	1.60446e-11	1.71557e-11	1.85436e-11	3.68184e-11	1.39488e-11	1.77907e-11	1.47652e-11	4.31575e-11	1.47137e-11	1.65517e-11	1.66831e-11		1.95846e-11		1.83982e-11
28.6	1.34229e-11	1.75117e-11	2.3658e-11	1.60513e-11	1.71431e-11	1.85482e-11	3.68136e-11	1.39478e-11	1.77848e-11	1.47627e-11	4.31378e-11	1.471e-11	1.65508e-11	1.66794e-11		1.9588e-11		1.83976e-11
28.62	1.34189e-11	1.75229e-11	2.36422e-11	1.60497e-11	1.71474e-11	1.85526e-11	3.68221e-11	1.39472e-11	1.77884e-11	1.47637e-11	4.31287e-11	1.47085e-11	1.6551e-11	1.66874e-11		1.9588e-11		1.83913e-11
28.64	1.34147e-11	1.7518e-11	2.36524e-11	1.60484e-11	1.71491e-11	1.85482e-11	3.68218e-11	1.39402e-11	1.77832e-11	1.47637e-11	4.31174e-11	1.47125e-11	1.65492e-11	1.66813e-11		1.95874e-11		1.83969e-11
28.66	1.34198e-11	1.75155e-11	2.36592e-11	1.60533e-11	1.71461e-11	1.85477e-11	3.68188e-11	1.39429e-11	1.77815e-11	1.47641e-11	4.31279e-11	1.47072e-11	1.65504e-11	1.66805e-11		1.95894e-11		1.83983e-11
28.68	1.34204e-11	1.75211e-11	2.36564e-11	1.60534e-11	1.71414e-11	1.85478e-11	3.68156e-11	1.39405e-11	1.77879e-11	1.47629e-11	4.31434e-11	1.47154e-11	1.65541e-11	1.66875e-11		1.95872e-11		1.84026e-11
28.7	1.34233e-11	1.75114e-11	2.36452e-11	1.60474e-11	1.71466e-11	1.85508e-11	3.68232e-11	1.39323e-11	1.77862e-11	1.47641e-11	4.31227e-11	1.47086e-11	1.65474e-11	1.66822e-11		1.95853e-11		1.84035e-11
28.72	1.34161e-11	1.7513e-11	2.36455e-11	1.60452e-11	1.71456e-11	1.85479e-11	3.68222e-11	1.39385e-11	1.77906e-11	1.47623e-11	4.31285e-11	1.47099e-11	1.655e-11	1.66846e-11		1.95893e-11		1.83999e-11
28.74	1.34206e-11	1.75118e-11	2.36607e-11	1.60478e-11	1.71455e-11	1.85514e-11	3.68062e-11	1.39443e-11	1.77855e-11	1.47637e-11	4.31265e-11	1.47142e-11	1.65593e-11	1.66897e-11		1.95839e-11		1.83978e-11
28.76	1.34178e-11	1.75137e-11	2.36553e-11	1.60551e-11	1.71488e-11	1.85532e-11	3.68092e-11	1.39327e-11	1.77858e-11	1.47639e-11	4.3132e-11	1.47097e-11	1.65551e-11	1.6694e-11		1.95857e-11		1.84046e-11
28.78	1.34229e-11	1.75095e-11	2.36793e-11	1.60503e-11	1.71393e-11	1.85517e-11	3.681e-11	1.39351e-11	1.77847e-11	1.47608e-11	4.31306e-11	1.47082e-11	1.6551e-11	1.66838e-11		1.95862e-11		1.83992e-11
28.8	1.34231e-11	1.75025e-11	2.36543e-11	1.60467e-11	1.71451e-11	1.85467e-11	3.6808e-11	1.39281e-11	1.77887e-11	1.47597e-11	4.31191e-11	1.47127e-11	1.65519e-11	1.66885e-11		1.95855e-11		1.84036e-11
28.82	1.34203e-11	1.75135e-11	2.36598e-11	1.605e-11	1.71489e-11	1.85532e-11	3.68075e-11	1.39338e-11	1.77864e-11	1.47647e-11	4.31458e-11	1.4711e-11	1.65509e-11	1.66881e-11		1.95888e-11		1.83969e-11
28.84	1.34187e-11	1.75092e-11	2.36617e-11	1.60516e-11	1.71464e-11	1.85539e-11	3.6813e-11	1.39421e-11	1.77854e-11	1.47621e-11	4.31375e-11	1.47104e-11	1.65493e-11	1.66844e-11		1.95912e-11		1.83941e-11
28.86	1.34169e-11	1.75194e-11	2.36559e-11	1.60489e-11	1.71489e-11	1.85508e-11	3.6805e-11	1.39368e-11	1.77879e-11	1.47671e-11	4.31204e-11	1.47132e-11	1.65493e-11	1.66833e-11		1.95887e-11		1.84e-11
28.88	1.34235e-11	1.75162e-11	2.3656e-11	1.60481e-11	1.71515e-11	1.8543e-11	3.68103e-11	1.39337e-11	1.77838e-11	1.47668e-11	4.31438e-11	1.47084e-11	1.65503e-11	1.66784e-11		1.95892e-11		1.83976e-11
28.9	1.34171e-11	1.7508e-11	2.36476e-11	1.60546e-11	1.71516e-11	1.85474e-11	3.68157e-11	1.39354e-11	1.77838e-11	1.47658e-11	4.31179e-11	1.47082e-11	1.65522e-11	1.66893e-11		1.95928e-11		1.83964e-11
28.92	1.34197e-11	1.7511e-11	2.36421e-11	1.60513e-11	1.71463e-11	1.8546e-11	3.68064e-11	1.39372e-11	1.77883e-11	1.47656e-11	4.31291e-11	1.47106e-11	1.65496e-11	1.66813e-11		1.95881e-11		1.83939e-11
28.94	1.34217e-11	1.75038e-11	2.36433e-11	1.60482e-11	1.71436e-11	1.85524e-11	3.68129e-11	1.39399e-11	1.77872e-11	1.47684e-11	4.3128e-11	1.46616e-11	1.6546e-11	1.6687e-11		1.95891e-11		1.83956e-11
28.96	1.34235e-11	1.75103e-11	2.36446e-11	1.60538e-11	1.71376e-11	1.85513e-11	3.68193e-11	1.39344e-11	1.77853e-11	1.47634e-11	4.31391e-11	1.48103e-11	1.65524e-11	1.6687e-11		1.95929e-11		1.83995e-11
28.98	1.34166e-11	1.75075e-11	2.3646e-11	1.60473e-11	1.71452e-11	1.85491e-11	3.6818e-11	1.39349e-11	1.7787e-11	1.4762e-11	4.31202e-11	1.46972e-11	1.65489e-11	1.66813e-11		1.95935e-11		1.83924e-11
29	1.34236e-11	1.75102e-11	2.36516e-11	1.6051e-11	1.71456e-11	1.85502e-11	3.68202e-11	1.3941e-11	1.77855e-11	1.47639e-11	4.31133e-11	1.46956e-11	1.65487e-11	1.66925e-11		1.95873e-11		1.83973e-11
29.02	1.34243e-11	1.75135e-11	2.36464e-11	1.60491e-11	1.71457e-11	1.85476e-11	3.68187e-11	1.39373e-11	1.77772e-11	1.47632e-11	4.31211e-11	1.47014e-11	1.6554e-11	1.66853e-11		1.95928e-11		1.83996e-11
29.04	1.34264e-11	1.75147e-11	2.36458e-11	1.605e-11	1.71496e-11	1.85483e-11	3.68269e-11	1.39376e-11	1.77846e-11	1.4764e-11	4.31254e-11	1.47029e-11	1.65478e-11	1.6687e-11		1.95909e-11		1.84011e-11
29.06	1.34224e-11	1.75167e-11	2.36502e-11	1.60459e-11	1.71494e-11	1.85487e-11	3.68198e-11	1.3935e-11	1.77889e-11	1.47673e-11	4.31452e-11	1.47049e-11	1.65501e-11	1.66855e-11		1.9592e-11		1.83992e-11
29.08	1.34197e-11	1.75196e-11	2.3649e-11	1.60522e-11	1.71483e-11	1.85451e-11	3.68309e-11	1.39404e-11	1.77875e-11	1.47674e-11	4.31426e-11	1.47072e-11	1.655e-11	1.66904e-11		1.95941e-11		1.83976e-11
29.1	1.34191e-11	1.75182e-11	2.36535e-11	1.60524e-11	1.71513e-11	1.85323e-11	3.68298e-11	1.39371e-11	1.77838e-11	1.47693e-11	4.31438e-11	1.47182e-11	1.65525e-11	1.66956e-11		1.95938e-11		1.83952e-11
29.12	1.3426e-11	1.75131e-11	2.3647e-11	1.60579e-11	1.71438e-11	1.85387e-11	3.68299e-11	1.39324e-11	1.77891e-11	1.47691e-11	4.31409e-11	1.47308e-11	1.65498e-11	1.67053e-11		1.95905e-11		1.83977e-11
29.14	1.34228e-11	1.75224e-11	2.36531e-11	1.6051e-11	1.71402e-11	1.85374e-11	3.68232e-11	1.39348e-11	1.77803e-11	1.47663e-11	4.31421e-11	1.47433e-11	1.65559e-11	1.67287e-11		1.95971e-11		1.84003e-11
29.16	1.34248e-11	1.75125e-11	2.36524e-11	1.60512e-11	1.71488e-11	1.85384e-11	3.68241e-11	1.39376e-11	1.77902e-11	1.47639e-11	4.31277e-11	1.47581e-11	1.65443e-11	1.67414e-11		1.95918e-11		1.83934e-11
29.18	1.34277e-11	1.75115e-11	2.36594e-11	1.60472e-11	1.715e-11	1.85357e-11	3.68208e-11	1.39293e-11	1.77835e-11	1.47674e-11	4.31398e-11	1.47726e-11	1.65546e-11	1.67512e-11		1.95895e-11		1.8391e-11
29.2	1.34262e-11	1.75144e-11	2.36382e-11	1.6049e-11	1.71478e-11	1.85316e-11	3.68145e-11	1.39307e-11	1.77809e-11	1.4768e-11	4.31357e-11	1.47789e-11	1.65535e-11	1.67684e-11		1.95894e-11		1.83926e-11
29.22	1.3425e-11	1.7515e-11	2.36418e-11	1.60542e-11	1.71448e-11	1.8527e-11	3.6822e-11	1.39389e-11	1.77868e-11	1.47621e-11	4.31334e-11	1.4783e-11	1.65453e-11	1.67839e-11		1.95871e-11		1.83933e-11
29.24	1.34266e-11	1.75156e-11	2.36457e-11	1.60562e-11	1.71495e-11	1.8527e-11	3.68228e-11	1.39313e-11	1.77828e-11	1.47627e-11	4.31341e-11	1.47843e-11	1.65454e-11	1.67997e-11		1.95928e-11		1.84016e-11
29.26	1.34276e-11	1.75178e-11	2.36492e-11	1.60484e-11	1.71448e-11	1.85313e-11	3.68268e-11	1.39377e-11	1.77836e-11	1.4769e-11	4.31416e-11	1.47925e-11	1.65425e-11	1.68098e-11		1.95909e-11		1.83949e-11
29.28	1.34283e-11	1.75171e-11	2.36451e-11	1.60523e-11	1.71432e-11	1.85292e-11	3.68215e-11	1.39357e-11	1.77848e-11	1.47652e-11	4.31322e-11	1.47923e-11	1.6551e-11	1.68222e-11		1.95894e-11		1.84015e-11
29.3	1.34246e-11	1.7521e-11	2.36405e-11	1.60498e-11	1.71503e-11	1.85316e-11	3.68166e-11	1.3938e-11	1.77862e-11	1.47644e-11	4.31515e-11	1.47948e-11	1.65466e-11	1.68258e-11		1.95913e-11		1.83996e-11
29.32	1.34335e-11	1.75145e-11	2.3659e-11	1.60547e-11	1.71453e-11	1.85327e-11	3.68147e-11	1.39386e-11	1.77816e-11	1.47604e-11	4.31421e-11	1.47923e-11	1.6552e-11	1.68285e-11		1.95892e-11		1.84004e-11
29.34	1.34356e-11	1.7519e-11	2.36462e-11	1.60481e-11	1.7142e-11	1.85215e-11	3.68191e-11	1.39343e-11	1.77848e-11	1.47648e-11	4.31529e-11	1.47971e-11	1.65476e-11	1.68384e-11		1.95885e-11		1.83886e-11
29.36	1.34346e-11	1.75162e-11	2.36521e-11	1.60517e-11	1.71381e-11	1.85288e-11	3.6821e-11	1.39287e-11	1.77911e-11	1.47678e-11	4.3152e-11	1.47957e-11	1.6549e-11	1.68402e-11		1.95906e-11		1.83994e-11
29.38	1.3435e-11	1.7515e-11	2.36421e-11	1.60529e-11	1.71411e-11	1.85308e-11	3.68126e-11	1.39342e-11	1.77869e-11	1.47588e-11	4.3153e-11	1.47902e-11	1.65526e-11	1.68296e-11		1.95873e-11		1.83904e-11
29.4	1.34354e-11	1.75226e-11	2.36585e-11	1.60521e-11	1.71443e-11	1.85279e-11	3.68199e-11	1.39366e-11	1.77848e-11	1.47647e-11	4.31431e-11	1.47964e-11	1.65464e-11	1.68357e-11		1.95861e-11		1.83933e-11
29.42	1.3441e-11	1.75136e-11	2.36427e-11	1.60558e-11	1.71469e-11	1.85304e-11	3.68151e-11	1.39357e-11	1.77889e-11	1.47692e-11	4.31575e-11	1.47868e-11	1.65502e-11	1.68302e-11		1.9589e-11		1.84003e-11
29.44	1.34415e-11	1.75179e-11	2.36398e-11	1.60586e-11	1.71471e-11	1.85305e-11	3.6816e-11	1.39308e-11	1.77834e-11	1.47626e-11	4.31368e-11	1.47935e-11	1.65487e-11	1.68279e-11		1.95961e-11		1.83997e-11
29.46	1.34412e-11	1.75245e-11	2.3648e-11	1.60551e-11	1.71419e-11	1.8526e-11	3.682e-11	1.39317e-11	1.77858e-11	1.47657e-11	4.31452e-11	1.47949e-11	1.65496e-11	1.68317e-11		1.95911e-11		1.83893e-11
29.48	1.34391e-11	1.75191e-11	2.36459e-11	1.60492e-11	1.71425e-11	1.85351e-11	3.68249e-11	1.39271e-11	1.77925e-11	1.4765e-11	4.31625e-11	1.47904e-11	1.65487e-11	1.68352e-11		1.95962e-11		1.83891e-11
29.5	1.34383e-11	1.7525e-11	2.36537e-11	1.60518e-11	1.71471e-11	1.85272e-11	3.68217e-11	1.39308e-11	1.77869e-11	1.4767e-11	4.31524e-11	1.47862e-11	1.65471e-11	1.68324e-11		1.95847e-11		1.83955e-11
29.52	1.34385e-11	1.7524e-11	2.36471e-11	1.60562e-11	1.71445e-11	1.85357e-11	3.68258e-11	1.39345e-11	1.77872e-11	1.47628e-11	4.31466e-11	1.47954e-11	1.65476e-11	1.68248e-11		1.9587e-11		1.83963e-11
29.54	1.3444e-11	1.75292e-11	2.3656e-11	1.60513e-11	1.71454e-11	1.85318e-11	3.68188e-11	1.39391e-11	1.77843e-11	1.4767e-11	4.31547e-11	1.47921e-11	1.65546e-11	1.6838e-11		1.9593e-11		1.83925e-11
29.56	1.34436e-11	1.75209e-11	2.3638e-11	1.60547e-11	1.71432e-11	1.85302e-11	3.68239e-11	1.39368e-11	1.77801e-11	1.47679e-11	4.31524e-11	1.47907e-11	1.65537e-11	1.68316e-11		1.95944e-11		1.8399e-11
29.58	1.34453e-11	1.7529e-11	2.36356e-11	1.60528e-11	1.71392e-11	1.85319e-11	3.68194e-11	1.39402e-11	1.77881e-11	1.47634e-11	4.31568e-11	1.47914e-11	1.65522e-11	1.68268e-11		1.959e-11		1.84046e-11
29.6	1.34426e-11	1.75318e-11	2.36332e-11	1.60525e-11	1.7147e-11	1.8524e-11	3.6817e-11	1.3938e-11	1.77888e-11	1.47657e-11	4.3144e-11	1.47928e-11	1.65509e-11	1.68255e-11		1.95926e-11		1.83981e-11
29.62	1.34441e-11	1.75318e-11	2.36434e-11	1.6051e-11	1.71476e-11	1.85297e-11	3.68236e-11	1.39335e-11	1.77855e-11	1.47584e-11	4.31415e-11	1.47908e-11	1.65482e-11	1.68252e-11		1.95969e-11		1.83941e-11
29.64	1.34457e-11	1.75239e-11	2.36497e-11	1.60514e-11	1.71418e-11	1.85309e-11	3.68208e-11	1.39357e-11	1.7787e-11	1.47721e-11	4.31474e-11	1.47918e-11	1.65494e-11	1.68234e-11		1.95946e-11		1.83908e-11
29.66	1.34406e-11	1.75294e-11	2.36405e-11	1.60471e-11	1.71464e-11	1.8532e-11	3.68229e-11	1.39357e-11	1.7784e-11	1.47668e-11	4.31432e-11	1.47865e-11	1.65557e-11	1.68307e-11		1.95943e-11		1.84021e-11
29.68	1.34447e-11	1.75338e-11	2.36464e-11	1.60469e-11	1.71473e-11	1.85258e-11	3.68291e-11	1.39385e-11	1.77897e-11	1.477e-11	4.31373e-11	1.47916e-11	1.65494e-11	1.6836e-11		1.95895e-11		1.83939e-11
29.7	1.34453e-11	1.75294e-11	2.36473e-11	1.60526e-11	1.71495e-11	1.85358e-11	3.68222e-11	1.39369e-11	1.77845e-11	1.47681e-11	4.31437e-11	1.47859e-11	1.65447e-11	1.68296e-11		1.95944e-11		1.8398e-11
29.72	1.34466e-11	1.7528e-11	2.36528e-11	1.60527e-11	1.71449e-11	1.85283e-11	3.68237e-11	1.39362e-11	1.77846e-11	1.47659e-11	4.3168e-11	1.47931e-11	1.65424e-11	1.68283e-11		1.9594e-11		1.84032e-11
29.74	1.34465e-11	1.75299e-11	2.36481e-11	1.60512e-11	1.71462e-11	1.853e-11	3.68239e-11	1.39351e-11	1.77886e-11	1.477e-11	4.31442e-11	1.47935e-11	1.65446e-11	1.68272e-11		1.95937e-11		1.84047e-11
29.76	1.34468e-11	1.75304e-11	2.36387e-11	1.6049e-11	1.71439e-11	1.85317e-11	3.68131e-11	1.39382e-11	1.7791e-11	1.47677e-11	4.31556e-11	1.47877e-11	1.65439e-11	1.68284e-11		1.95965e-11		1.84053e-11
29.78	1.34458e-11	1.752e-11	2.36432e-11	1.60536e-11	1.71504e-11	1.85302e-11	3.68221e-11	1.39332e-11	1.77895e-11	1.47651e-11	4.31362e-11	1.47861e-11	1.65454e-11	1.68252e-11		1.9596e-11		1.84006e-11
29.8	1.34446e-11	1.75289e-11	2.36554e-11	1.60457e-11	1.71391e-11	1.85313e-11	3.68161e-11	1.39404e-11	1.77906e-11	1.47682e-11	4.31362e-11	1.4791e-11	1.65486e-11	1.68221e-11		1.95978e-11		1.83997e-11
29.82	1.34486e-11	1.75308e-11	2.36532e-11	1.60476e-11	1.71413e-11	1.85277e-11	3.6824e-11	1.39361e-11	1.77839e-11	1.47659e-11	4.3154e-11	1.47923e-11	1.65418e-11	1.68278e-11		1.95925e-11		1.83947e-11
29.84	1.34465e-11	1.75352e-11	2.36594e-11	1.60507e-11	1.71491e-11	1.85321e-11	3.68251e-11	1.39318e-11	1.77897e-11	1.47666e-11	4.3155e-11	1.47893e-11	1.65553e-11	1.68222e-11		1.95998e-11		1.83934e-11
29.86	1.34499e-11	1.75777e-11	2.36542e-11	1.60541e-11	1.71513e-11	1.85289e-11	3.68222e-11	1.3936e-11	1.77862e-11	1.47657e-11	4.31503e-11	1.47913e-11	1.65483e-11	1.68282e-11		1.95996e-11		1.83945e-11
29.88	1.34509e-11	1.75379e-11	2.3659e-11	1.60573e-11	1.71474e-11	1.8526e-11	3.68159e-11	1.39315e-11	1.77878e-11	1.4767e-11	4.31445e-11	1.47913e-11	1.65456e-11	1.68323e-11		1.96008e-11		1.8397e-11
29.9	1.34516e-11	1.75365e-11	2.36435e-11	1.60532e-11	1.71484e-11	1.85289e-11	3.68247e-11	1.39377e-11	1.77848e-11	1.47642e-11	4.31557e-11	1.47959e-11	1.65444e-11	1.68224e-11		1.95976e-11		1.83982e-11
29.92	1.3455e-11	1.75385e-11	2.3642e-11	1.60492e-11	1.71497e-11	1.85274e-11	3.68243e-11	1.39367e-11	1.7789e-11	1.47698e-11	4.31545e-11	1.47901e-11	1.65421e-11	1.68246e-11		1.95958e-11		1.83991e-11
29.94	1.34493e-11	1.75392e-11	2.36399e-11	1.60463e-11	1.71498e-11	1.85276e-11	3.68178e-11	1.39365e-11	1.7784e-11	1.47699e-11	4.31491e-11	1.47881e-11	1.65406e-11	1.682e-11		1.95935e-11		1.83942e-11
29.96	1.34539e-11	1.75296e-11	2.36465e-11	1.60523e-11	1.71475e-11	1.85317e-11	3.68237e-11	1.39367e-11	1.7787e-11	1.47626e-11	4.31573e-11	1.47896e-11	1.65437e-11	1.68223e-11		1.96021e-11		1.84001e-11
29.98	1.3447e-11	1.75348e-11	2.36484e-11	1.6052e-11	1.71454e-11	1.85256e-11	3.6821e-11	1.39351e-11	1.77871e-11	1.47676e-11	4.31466e-11	1.47865e-11	1.65425e-11	1.68231e-11		1.95912e-11		1.83957e-11
30	1.34525e-11	1.754e-11	2.36537e-11	1.60542e-11	1.71445e-11	1.85297e-11	3.68294e-11	1.39351e-11	1.77896e-11	1.47675e-11	4.31594e-11	1.47941e-11	1.65431e-11	1.68204e-11		1.95896e-11		1.83939e-11
30.02	1.34523e-11	1.75476e-11	2.3646e-11	1.6052e-11	1.71464e-11	1.85276e-11	3.68222e-11	1.3931e-11	1.77905e-11	1.47666e-11	4.31538e-11	1.4791e-11	1.65406e-11	1.68205e-11		1.9591e-11		1.83969e-11
30.04	1.34518e-11	1.7568e-11	2.36534e-11	1.6054e-11	1.71488e-11	1.85266e-11	3.68316e-11	1.39376e-11	1.77861e-11	1.47615e-11	4.31563e-11	1.47922e-11	1.6542e-11	1.68226e-11		1.95947e-11		1.83993e-11
30.06	1.345e-11	1.75765e-11	2.36561e-11	1.6049e-11	1.71501e-11	1.85274e-11	3.68273e-11	1.39324e-11	1.77872e-11	1.47659e-11	4.31503e-11	1.47951e-11	1.65461e-11	1.6823e-11		1.95963e-11		1.83985e-11
30.08	1.34594e-11	1.75884e-11	2.36527e-11	1.60581e-11	1.71397e-11	1.85281e-11	3.6825e-11	1.39408e-11	1.77853e-11	1.47643e-11	4.31527e-11	1.47872e-11	1.65378e-11	1.6824e-11		1.95951e-11		1.83954e-11
30.1	1.34562e-11	1.76019e-11	2.36598e-11	1.60506e-11	1.71458e-11	1.85249e-11	3.68268e-11	1.39459e-11	1.77836e-11	1.47702e-11	4.31399e-11	1.47892e-11	1.65425e-11	1.68211e-11		1.95951e-11		1.8396e-11
30.12	1.34525e-11	1.76159e-11	2.36537e-11	1.60518e-11	1.71479e-11	1.85202e-11	3.68202e-11	1.39307e-11	1.77903e-11	1.47639e-11	4.31565e-11	1.47911e-11	1.65411e-11	1.68236e-11		1.95949e-11		1.83958e-11
30.14	1.34572e-11	1.76184e-11	2.36434e-11	1.60587e-11	1.7149e-11	1.85254e-11	3.68157e-11	1.39352e-11	1.77833e-11	1.47697e-11	4.3161e-11	1.47902e-11	1.65425e-11	1.68206e-11		1.95955e-11		1.83932e-11
30.16	1.34535e-11	1.76383e-11	2.36544e-11	1.6054e-11	1.71477e-11	1.85194e-11	3.68125e-11	1.39405e-11	1.77845e-11	1.47648e-11	4.31634e-11	1.47969e-11	1.65427e-11	1.68223e-11		1.95941e-11		1.83978e-11
30.18	1.34509e-11	1.76434e-11	2.36537e-11	1.60565e-11	1.71458e-11	1.85208e-11	3.68173e-11	1.39363e-11	1.77876e-11	1.47691e-11	4.31565e-11	1.47942e-11	1.65359e-11	1.68253e-11		1.95941e-11		1.83976e-11
30.2	1.34547e-11	1.76432e-11	2.36432e-11	1.60491e-11	1.71455e-11	1.85223e-11	3.68176e-11	1.39438e-11	1.77862e-11	1.47657e-11	4.31477e-11	1.47952e-11	1.65405e-11	1.68252e-11		1.9589e-11		1.83938e-11
30.22	1.34553e-11	1.76409e-11	2.36398e-11	1.60519e-11	1.71405e-11	1.85211e-11	3.68207e-11	1.39347e-11	1.7791e-11	1.47638e-11	4.31489e-11	1.47919e-11	1.65411e-11	1.68223e-11		1.95931e-11		1.8399e-11
30.24	1.34597e-11	1.76396e-11	2.36511e-11	1.60504e-11	1.7149e-11	1.85244e-11	3.68211e-11	1.39387e-11	1.77913e-11	1.47692e-11	4.31379e-11	1.47875e-11	1.65417e-11	1.68183e-11		1.95941e-11		1.83917e-11
30.26	1.34566e-11	1.76435e-11	2.36485e-11	1.60563e-11	1.71459e-11	1.85221e-11	3.68235e-11	1.39394e-11	1.7788e-11	1.4768e-11	4.31614e-11	1.47976e-11	1.65396e-11	1.68234e-11		1.95988e-11		1.83979e-11
30.28	1.34521e-11	1.76405e-11	2.36557e-11	1.60486e-11	1.71433e-11	1.85184e-11	3.68276e-11	1.39391e-11	1.77883e-11	1.47701e-11	4.31514e-11	1.47927e-11	1.65478e-11	1.68198e-11		1.9594e-11		1.83966e-11
30.3	1.34559e-11	1.76439e-11	2.36525e-11	1.60467e-11	1.71484e-11	1.85281e-11	3.68289e-11	1.39302e-11	1.77855e-11	1.47684e-11	4.31518e-11	1.47923e-11	1.65453e-11	1.68291e-11		1.96033e-11		1.83896e-11
30.32	1.34569e-11	1.76432e-11	2.36558e-11	1.6053e-11	1.71435e-11	1.85223e-11	3.68192e-11	1.39267e-11	1.77863e-11	1.47671e-11	4.3149e-11	1.47941e-11	1.65421e-11	1.68201e-11		1.95962e-11		1.83962e-11
30.34	1.34581e-11	1.76403e-11	2.36558e-11	1.60545e-11	1.71463e-11	1.85242e-11	3.68249e-11	1.39373e-11	1.77951e-11	1.47722e-11	4.31566e-11	1.47937e-11	1.65427e-11	1.68204e-11		1.96036e-11		1.83992e-11
30.36	1.3459e-11	1.76392e-11	2.36626e-11	1.60524e-11	1.71457e-11	1.85154e-11	3.68241e-11	1.39367e-11	1.77872e-11	1.47648e-11	4.31446e-11	1.47957e-11	1.65396e-11	1.68271e-11		1.96015e-11		1.83972e-11
30.38	1.34585e-11	1.76376e-11	2.36699e-11	1.60495e-11	1.71484e-11	1.85216e-11	3.68292e-11	1.39386e-11	1.77848e-11	1.47626e-11	4.31713e-11	1.47984e-11	1.65379e-11	1.68274e-11		1.95976e-11		1.83904e-11
30.4	1.34605e-11	1.76337e-11	2.36565e-11	1.60512e-11	1.71447e-11	1.85261e-11	3.68265e-11	1.39351e-11	1.77874e-11	1.47656e-11	4.31585e-11	1.47894e-11	1.65355e-11	1.68208e-11		1.95948e-11		1.83955e-11
30.42	1.34577e-11	1.76326e-11	2.36587e-11	1.60518e-11	1.71491e-11	1.85323e-11	3.68267e-11	1.39346e-11	1.77865e-11	1.47675e-11	4.31527e-11	1.47942e-11	1.65354e-11	1.68248e-11		1.96005e-11		1.84e-11
30.44	1.34554e-11	1.76335e-11	2.36613e-11	1.60516e-11	1.71523e-11	1.85304e-11	3.68255e-11	1.39355e-11	1.77845e-11	1.47705e-11	4.31604e-11	1.47941e-11	1.65459e-11	1.6822e-11		1.95966e-11		1.83966e-11
30.46	1.34597e-11	1.76342e-11	2.36582e-11	1.60487e-11	1.71477e-11	1.8533e-11	3.68256e-11	1.39344e-11	1.77849e-11	1.47672e-11	4.31679e-11	1.47929e-11	1.65399e-11	1.68242e-11		1.95952e-11		1.83976e-11
30.48	1.3461e-11	1.7627e-11	2.36531e-11	1.60571e-11	1.7147e-11	1.85333e-11	3.6821e-11	1.39384e-11	1.77867e-11	1.47667e-11	4.31534e-11	1.47955e-11	1.65471e-11	1.68211e-11		1.95926e-11		1.83919e-11
30.5	1.34568e-11	1.76394e-11	2.36589e-11	1.60567e-11	1.7146e-11	1.85367e-11	3.68198e-11	1.39376e-11	1.77869e-11	1.47643e-11	4.31447e-11	1.4795e-11	1.65368e-11	1.68247e-11		1.96022e-11		1.83946e-11
30.52	1.34619e-11	1.76351e-11	2.36501e-11	1.60553e-11	1.7149e-11	1.85309e-11	3.68278e-11	1.39329e-11	1.77847e-11	1.47682e-11	4.31642e-11	1.47978e-11	1.65363e-11	1.68213e-11		1.95966e-11		1.8397e-11
30.54	1.34591e-11	1.76303e-11	2.36503e-11	1.60534e-11	1.71311e-11	1.85351e-11	3.68185e-11	1.39343e-11	1.7787e-11	1.4763e-11	4.31617e-11	1.47942e-11	1.65382e-11	1.68229e-11		1.9597e-11		1.83992e-11
30.56	1.34547e-11	1.76316e-11	2.36548e-11	1.60477e-11	1.71479e-11	1.85279e-11	3.68277e-11	1.39361e-11	1.77878e-11	1.47688e-11	4.31689e-11	1.47934e-11	1.65374e-11	1.68308e-11		1.95942e-11		1.8399e-11
30.58	1.34596e-11	1.7636e-11	2.36619e-11	1.60469e-11	1.7151e-11	1.85301e-11	3.68248e-11	1.39374e-11	1.77905e-11	1.4766e-11	4.31684e-11	1.47918e-11	1.65399e-11	1.68251e-11		1.95959e-11		1.83892e-11
30.6	1.34602e-11	1.76346e-11	2.36505e-11	1.60492e-11	1.71508e-11	1.85292e-11	3.68292e-11	1.39382e-11	1.7786e-11	1.47698e-11	4.31503e-11	1.47967e-11	1.6541e-11	1.68261e-11		1.95942e-11		1.83991e-11
30.62	1.34581e-11	1.76211e-11	2.36515e-11	1.60501e-11	1.71471e-11	1.85304e-11	3.68312e-11	1.3941e-11	1.77919e-11	1.47635e-11	4.3151e-11	1.47955e-11	1.65344e-11	1.683e-11		1.95987e-11		1.84e-11
30.64	1.34621e-11	1.76316e-11	2.3663e-11	1.60511e-11	1.7147e-11	1.85313e-11	3.6829e-11	1.39377e-11	1.77842e-11	1.47728e-11	4.31624e-11	1.47926e-11	1.65376e-11	1.68304e-11		1.95944e-11		1.83984e-11
30.66	1.34596e-11	1.76361e-11	2.36564e-11	1.60489e-11	1.71458e-11	1.8531e-11	3.68225e-11	1.39361e-11	1.77867e-11	1.47673e-11	4.31649e-11	1.47971e-11	1.65412e-11	1.68275e-11		1.9598e-11		1.8395e-11
30.68	1.3461e-11	1.76243e-11	2.36769e-11	1.60465e-11	1.7142e-11	1.85324e-11	3.68321e-11	1.39357e-11	1.77886e-11	1.47638e-11	4.31716e-11	1.48018e-11	1.65388e-11	1.68338e-11		1.95958e-11		1.83985e-11
30.7	1.34611e-11	1.76318e-11	2.36649e-11	1.6058e-11	1.71578e-11	1.85333e-11	3.68293e-11	1.39472e-11	1.77907e-11	1.47612e-11	4.31569e-11	1.47974e-11	1.6532e-11	1.68324e-11		1.9596e-11		1.83942e-11
30.72	1.34594e-11	1.76435e-11	2.36684e-11	1.6051e-11	1.71621e-11	1.8531e-11	3.68173e-11	1.3933e-11	1.77846e-11	1.47732e-11	4.31583e-11	1.47999e-11	1.65352e-11	1.68337e-11		1.95995e-11		1.83979e-11
30.74	1.34724e-11	1.76459e-11	2.36685e-11	1.60475e-11	1.71691e-11	1.85302e-11	3.6826e-11	1.39346e-11	1.77868e-11	1.47689e-11	4.31682e-11	1.48008e-11	1.65331e-11	1.68291e-11		1.95934e-11		1.8399e-11
30.76	1.34657e-11	1.76505e-11	2.36582e-11	1.60521e-11	1.7179e-11	1.85272e-11	3.6827e-11	1.3937e-11	1.77824e-11	1.47648e-11	4.31674e-11	1.48034e-11	1.65318e-11	1.6832e-11		1.95986e-11		1.83908e-11
30.78	1.34663e-11	1.76569e-11	2.36711e-11	1.60478e-11	1.71905e-11	1.85272e-11	3.68231e-11	1.39333e-11	1.77867e-11	1.47643e-11	4.31624e-11	1.47983e-11	1.65346e-11	1.68363e-11		1.95972e-11		1.83969e-11
30.8	1.34639e-11	1.76562e-11	2.36681e-11	1.6055e-11	1.72006e-11	1.85336e-11	3.68222e-11	1.393e-11	1.77861e-11	1.47643e-11	4.31543e-11	1.48023e-11	1.65344e-11	1.6832e-11		1.9592e-11		1.83992e-11
30.82	1.34644e-11	1.76601e-11	2.3655e-11	1.60552e-11	1.72045e-11	1.8527e-11	3.68212e-11	1.39382e-11	1.77901e-11	1.47678e-11	4.31578e-11	1.48057e-11	1.65348e-11	1.68343e-11		1.95963e-11		1.83957e-11
30.84	1.34695e-11	1.76599e-11	2.36642e-11	1.60547e-11	1.72124e-11	1.85343e-11	3.68226e-11	1.39395e-11	1.77841e-11	1.47683e-11	4.31575e-11	1.48056e-11	1.65337e-11	1.68314e-11		1.96022e-11		1.83964e-11
30.86	1.34676e-11	1.76531e-11	2.36564e-11	1.60568e-11	1.72176e-11	1.853e-11	3.68304e-11	1.3936e-11	1.77882e-11	1.47681e-11	4.31597e-11	1.48059e-11	1.65381e-11	1.6836e-11		1.95965e-11		1.83948e-11
30.88	1.34678e-11	1.76509e-11	2.36629e-11	1.60558e-11	1.72198e-11	1.853e-11	3.6828e-11	1.39388e-11	1.77831e-11	1.47615e-11	4.31386e-11	1.48055e-11	1.65404e-11	1.68359e-11		1.95961e-11		1.83979e-11
30.9	1.34669e-11	1.76434e-11	2.36692e-11	1.6052e-11	1.72269e-11	1.85277e-11	3.68183e-11	1.39428e-11	1.77847e-11	1.4769e-11	4.32054e-11	1.48068e-11	1.65368e-11	1.68375e-11		1.95974e-11		1.83928e-11
30.92	1.3467e-11	1.76552e-11	2.36476e-11	1.60484e-11	1.72311e-11	1.85313e-11	3.68276e-11	1.39429e-11	1.77836e-11	1.47668e-11	4.31751e-11	1.48e-11	1.65317e-11	1.68408e-11		1.95974e-11		1.83878e-11
30.94	1.3465e-11	1.76551e-11	2.36679e-11	1.60518e-11	1.72326e-11	1.85319e-11	3.68225e-11	1.39426e-11	1.77912e-11	1.47682e-11	4.31629e-11	1.47995e-11	1.6532e-11	1.68326e-11		1.95986e-11		1.83878e-11
30.96	1.34706e-11	1.76528e-11	2.36619e-11	1.60515e-11	1.72308e-11	1.85296e-11	3.68241e-11	1.39463e-11	1.77852e-11	1.47694e-11	4.31617e-11	1.48054e-11	1.65326e-11	1.68373e-11		1.96009e-11		1.83911e-11
30.98	1.34724e-11	1.76535e-11	2.36637e-11	1.60532e-11	1.72338e-11	1.8529e-11	3.6816e-11	1.39427e-11	1.77837e-11	1.47654e-11	4.31543e-11	1.48059e-11	1.65359e-11	1.68392e-11		1.95954e-11		1.83974e-11
31	1.34645e-11	1.76591e-11	2.36642e-11	1.60504e-11	1.72267e-11	1.85313e-11	3.68252e-11	1.39474e-11	1.77875e-11	1.47695e-11	4.31738e-11	1.48065e-11	1.65418e-11	1.68378e-11		1.95931e-11		1.83873e-11
31.02	1.34664e-11	1.76526e-11	2.36567e-11	1.6051e-11	1.72314e-11	1.85219e-11	3.68262e-11	1.39442e-11	1.77885e-11	1.47672e-11	4.31658e-11	1.48059e-11	1.65405e-11	1.68359e-11		1.96012e-11		1.83974e-11
31.04	1.3471e-11	1.76531e-11	2.36612e-11	1.60546e-11	1.72303e-11	1.85203e-11	3.68168e-11	1.39457e-11	1.7784e-11	1.47692e-11	4.31753e-11	1.48094e-11	1.65466e-11	1.68416e-11		1.95944e-11		1.83954e-11
31.06	1.34647e-11	1.76517e-11	2.36624e-11	1.60503e-11	1.72282e-11	1.852e-11	3.68212e-11	1.39499e-11	1.7789e-11	1.47629e-11	4.32087e-11	1.4809e-11	1.65447e-11	1.68505e-11		1.95957e-11		1.83994e-11
31.08	1.34706e-11	1.7646e-11	2.36532e-11	1.60537e-11	1.72323e-11	1.85205e-11	3.68213e-11	1.39471e-11	1.77902e-11	1.47682e-11	4.32605e-11	1.48044e-11	1.65368e-11	1.68487e-11		1.95963e-11		1.84011e-11
31.1	1.3472e-11	1.76557e-11	2.36725e-11	1.60547e-11	1.7225e-11	1.85242e-11	3.68211e-11	1.39432e-11	1.77866e-11	1.47693e-11	4.3302e-11	1.48051e-11	1.65397e-11	1.68477e-11		1.95949e-11		1.83971e-11
31.12	1.34695e-11	1.76495e-11	2.36673e-11	1.60525e-11	1.72281e-11	1.85171e-11	3.6823e-11	1.39477e-11	1.77861e-11	1.47687e-11	4.33362e-11	1.48106e-11	1.65394e-11	1.68443e-11		1.95988e-11		1.83982e-11
31.14	1.34723e-11	1.76497e-11	2.36673e-11	1.60543e-11	1.72283e-11	1.85143e-11	3.68273e-11	1.39448e-11	1.77855e-11	1.47654e-11	4.3375e-11	1.48069e-11	1.65389e-11	1.68532e-11		1.95902e-11		1.83911e-11
31.16	1.34693e-11	1.76523e-11	2.36609e-11	1.60502e-11	1.72285e-11	1.85191e-11	3.68252e-11	1.39461e-11	1.77885e-11	1.47694e-11	4.3424e-11	1.48135e-11	1.65366e-11	1.68531e-11		1.95988e-11		1.8387e-11
31.18	1.34668e-11	1.76497e-11	2.36732e-11	1.60517e-11	1.72282e-11	1.85184e-11	3.683e-11	1.39503e-11	1.77847e-11	1.47658e-11	4.34505e-11	1.48048e-11	1.65383e-11	1.68535e-11		1.9594e-11		1.83993e-11
31.2	1.34682e-11	1.76527e-11	2.36627e-11	1.60555e-11	1.72282e-11	1.85185e-11	3.6819e-11	1.39517e-11	1.77891e-11	1.47703e-11	4.34755e-11	1.48105e-11	1.65332e-11	1.68546e-11		1.96043e-11		1.83903e-11
31.22	1.34702e-11	1.76569e-11	2.36719e-11	1.60535e-11	1.72258e-11	1.85206e-11	3.68186e-11	1.39443e-11	1.77841e-11	1.47679e-11	4.35005e-11	1.481e-11	1.65388e-11	1.68532e-11		1.95988e-11		1.8392e-11
31.24	1.34682e-11	1.76541e-11	2.36728e-11	1.60576e-11	1.72198e-11	1.85188e-11	3.68182e-11	1.39555e-11	1.77825e-11	1.47642e-11	4.35116e-11	1.48122e-11	1.65389e-11	1.6861e-11		1.95999e-11		1.83977e-11
31.26	1.34696e-11	1.76592e-11	2.36617e-11	1.60505e-11	1.72209e-11	1.85177e-11	3.68211e-11	1.39481e-11	1.77849e-11	1.47674e-11	4.35341e-11	1.48124e-11	1.65301e-11	1.6861e-11		1.95998e-11		1.84025e-11
31.28	1.34681e-11	1.76569e-11	2.36745e-11	1.60551e-11	1.72299e-11	1.85186e-11	3.68211e-11	1.39468e-11	1.7789e-11	1.47653e-11	4.35279e-11	1.48131e-11	1.65345e-11	1.68624e-11		1.95934e-11		1.8391e-11
31.3	1.34672e-11	1.76632e-11	2.36725e-11	1.6053e-11	1.72305e-11	1.85208e-11	3.68187e-11	1.39504e-11	1.77826e-11	1.47699e-11	4.35366e-11	1.48114e-11	1.65341e-11	1.68613e-11		1.95969e-11		1.83974e-11
31.32	1.34701e-11	1.76548e-11	2.36677e-11	1.60533e-11	1.72224e-11	1.85166e-11	3.68249e-11	1.39446e-11	1.77838e-11	1.4764e-11	4.35309e-11	1.48119e-11	1.65314e-11	1.6871e-11		1.95968e-11		1.83911e-11
31.34	1.34709e-11	1.76564e-11	2.36624e-11	1.60546e-11	1.72256e-11	1.85166e-11	3.68286e-11	1.39438e-11	1.77893e-11	1.47702e-11	4.35283e-11	1.48137e-11	1.65286e-11	1.68637e-11		1.95939e-11		1.8394e-11
31.36	1.34659e-11	1.76615e-11	2.36658e-11	1.6049e-11	1.72223e-11	1.8522e-11	3.6823e-11	1.39461e-11	1.77903e-11	1.47722e-11	4.35413e-11	1.48101e-11	1.65364e-11	1.68661e-11		1.95944e-11		1.83962e-11
31.38	1.34639e-11	1.76586e-11	2.36638e-11	1.60499e-11	1.72211e-11	1.85239e-11	3.68219e-11	1.39515e-11	1.77885e-11	1.47668e-11	4.35469e-11	1.48131e-11	1.65357e-11	1.6863e-11		1.95981e-11		1.83965e-11
31.4	1.34657e-11	1.76504e-11	2.36683e-11	1.60502e-11	1.7224e-11	1.85142e-11	3.68237e-11	1.39523e-11	1.77897e-11	1.47694e-11	4.35095e-11	1.48194e-11	1.65394e-11	1.68682e-11		1.9595e-11		1.8389e-11
31.42	1.34634e-11	1.76577e-11	2.36623e-11	1.60537e-11	1.72228e-11	1.85144e-11	3.68256e-11	1.39468e-11	1.77914e-11	1.47657e-11	4.35099e-11	1.48192e-11	1.6535e-11	1.68736e-11		1.95971e-11		1.8398e-11
31.44	1.34646e-11	1.76635e-11	2.36625e-11	1.60482e-11	1.72255e-11	1.85121e-11	3.68263e-11	1.39478e-11	1.77893e-11	1.47706e-11	4.35142e-11	1.48155e-11	1.65357e-11	1.68689e-11		1.95914e-11		1.83929e-11
31.46	1.34732e-11	1.7667e-11	2.36705e-11	1.60533e-11	1.72241e-11	1.85166e-11	3.68271e-11	1.39501e-11	1.7785e-11	1.47635e-11	4.35222e-11	1.48195e-11	1.65426e-11	1.68726e-11		1.95908e-11		1.83977e-11
31.48	1.34672e-11	1.76634e-11	2.36573e-11	1.60495e-11	1.72183e-11	1.85172e-11	3.68249e-11	1.39466e-11	1.77923e-11	1.47705e-11	4.35147e-11	1.4821e-11	1.65382e-11	1.68699e-11		1.95892e-11		1.83919e-11
31.5	1.34713e-11	1.76664e-11	2.36577e-11	1.60528e-11	1.72217e-11	1.85212e-11	3.68224e-11	1.3952e-11	1.7791e-11	1.47647e-11	4.35085e-11	1.48128e-11	1.65394e-11	1.68698e-11		1.95969e-11		1.83888e-11
31.52	1.34721e-11	1.76603e-11	2.36503e-11	1.605e-11	1.72236e-11	1.85309e-11	3.68209e-11	1.39479e-11	1.7789e-11	1.47687e-11	4.35186e-11	1.48162e-11	1.65499e-11	1.68725e-11		1.95924e-11		1.83931e-11
31.54	1.34728e-11	1.76634e-11	2.36519e-11	1.60538e-11	1.72221e-11	1.853e-11	3.68263e-11	1.39488e-11	1.77943e-11	1.47695e-11	4.35036e-11	1.48142e-11	1.65422e-11	1.68743e-11		1.95949e-11		1.83958e-11
31.56	1.34734e-11	1.76687e-11	2.36629e-11	1.60492e-11	1.72205e-11	1.85303e-11	3.68209e-11	1.39501e-11	1.77903e-11	1.47686e-11	4.35035e-11	1.48207e-11	1.65445e-11	1.6879e-11		1.96e-11		1.83911e-11
31.58	1.3469e-11	1.76701e-11	2.36581e-11	1.6054e-11	1.7227e-11	1.85328e-11	3.68242e-11	1.39472e-11	1.77888e-11	1.47669e-11	4.35039e-11	1.48178e-11	1.65425e-11	1.68734e-11		1.95903e-11		1.83925e-11
31.6	1.3468e-11	1.76706e-11	2.36554e-11	1.60503e-11	1.72242e-11	1.85305e-11	3.68228e-11	1.3947e-11	1.77892e-11	1.47657e-11	4.35062e-11	1.48134e-11	1.65426e-11	1.68746e-11		1.95945e-11		1.8399e-11
31.62	1.34681e-11	1.76677e-11	2.3652e-11	1.60504e-11	1.72244e-11	1.85311e-11	3.68209e-11	1.39449e-11	1.779e-11	1.47666e-11	4.35056e-11	1.48197e-11	1.65388e-11	1.68815e-11		1.95871e-11		1.83971e-11
31.64	1.347e-11	1.76721e-11	2.36466e-11	1.60518e-11	1.72223e-11	1.8534e-11	3.68239e-11	1.39459e-11	1.77904e-11	1.4771e-11	4.34938e-11	1.48139e-11	1.65383e-11	1.68796e-11		1.95964e-11		1.83975e-11
31.66	1.34704e-11	1.76732e-11	2.36607e-11	1.60531e-11	1.72187e-11	1.85299e-11	3.68265e-11	1.39406e-11	1.77905e-11	1.47681e-11	4.35134e-11	1.48149e-11	1.65443e-11	1.68799e-11		1.95925e-11		1.84055e-11
31.68	1.34744e-11	1.76771e-11	2.36518e-11	1.60528e-11	1.72246e-11	1.85295e-11	3.68321e-11	1.39495e-11	1.77851e-11	1.47665e-11	4.34861e-11	1.48149e-11	1.65448e-11	1.68824e-11		1.9599e-11		1.83913e-11
31.7	1.34711e-11	1.76672e-11	2.36566e-11	1.60497e-11	1.72198e-11	1.85275e-11	3.6827e-11	1.3941e-11	1.77942e-11	1.4767e-11	4.35022e-11	1.48172e-11	1.65429e-11	1.68802e-11		1.96022e-11		1.83956e-11
31.72	1.34718e-11	1.76773e-11	2.36445e-11	1.60498e-11	1.72222e-11	1.85275e-11	3.68291e-11	1.39454e-11	1.77896e-11	1.47622e-11	4.34896e-11	1.48204e-11	1.65422e-11	1.68839e-11		1.95955e-11		1.84012e-11
31.74	1.34736e-11	1.76791e-11	2.36482e-11	1.60547e-11	1.72187e-11	1.85319e-11	3.68269e-11	1.39443e-11	1.77915e-11	1.4765e-11	4.34992e-11	1.48189e-11	1.65429e-11	1.68873e-11		1.95957e-11		1.83957e-11
31.76	1.34722e-11	1.76811e-11	2.36467e-11	1.60473e-11	1.72172e-11	1.8534e-11	3.68211e-11	1.395e-11	1.77877e-11	1.47704e-11	4.35115e-11	1.4817e-11	1.65426e-11	1.68851e-11		1.95917e-11		1.84e-11
31.78	1.34729e-11	1.76768e-11	2.36503e-11	1.60556e-11	1.72198e-11	1.85321e-11	3.68251e-11	1.39517e-11	1.77886e-11	1.47669e-11	4.35016e-11	1.48187e-11	1.65427e-11	1.68878e-11		1.9593e-11		1.84019e-11
31.8	1.34727e-11	1.76933e-11	2.36509e-11	1.60514e-11	1.72244e-11	1.85293e-11	3.6831e-11	1.39542e-11	1.77931e-11	1.47667e-11	4.35062e-11	1.48204e-11	1.65462e-11	1.68879e-11		1.9594e-11		1.84034e-11
31.82	1.3475e-11	1.76874e-11	2.36516e-11	1.60499e-11	1.72187e-11	1.85293e-11	3.68277e-11	1.39489e-11	1.77882e-11	1.47687e-11	4.3509e-11	1.48212e-11	1.65477e-11	1.68907e-11		1.95977e-11		1.83971e-11
31.84	1.34734e-11	1.76951e-11	2.36556e-11	1.6052e-11	1.72204e-11	1.85275e-11	3.68275e-11	1.39494e-11	1.77932e-11	1.47678e-11	4.35104e-11	1.48218e-11	1.65432e-11	1.68961e-11		1.95982e-11		1.83957e-11
31.86	1.34734e-11	1.76919e-11	2.36467e-11	1.60527e-11	1.72197e-11	1.85303e-11	3.68269e-11	1.3946e-11	1.7795e-11	1.47643e-11	4.35133e-11	1.48204e-11	1.6547e-11	1.6889e-11		1.95921e-11		1.83964e-11
31.88	1.34779e-11	1.76914e-11	2.36587e-11	1.6054e-11	1.72233e-11	1.85312e-11	3.68268e-11	1.39444e-11	1.77927e-11	1.47693e-11	4.35122e-11	1.48224e-11	1.65365e-11	1.68946e-11		1.95992e-11		1.83985e-11
31.9	1.34722e-11	1.76956e-11	2.36639e-11	1.60514e-11	1.72176e-11	1.85091e-11	3.68198e-11	1.39458e-11	1.77853e-11	1.47618e-11	4.34936e-11	1.48235e-11	1.65432e-11	1.68919e-11		1.95987e-11		1.83948e-11
31.92	1.34791e-11	1.76978e-11	2.36599e-11	1.60515e-11	1.72171e-11	1.85317e-11	3.68209e-11	1.39496e-11	1.77918e-11	1.47647e-11	4.35072e-11	1.48189e-11	1.65402e-11	1.68896e-11		1.95976e-11		1.83929e-11
31.94	1.34808e-11	1.76998e-11	2.36513e-11	1.60514e-11	1.72209e-11	1.85291e-11	3.68239e-11	1.39514e-11	1.77913e-11	1.47697e-11	4.35088e-11	1.48215e-11	1.65442e-11	1.68921e-11		1.95971e-11		1.83949e-11
31.96	1.34836e-11	1.7697e-11	2.3664e-11	1.60503e-11	1.72218e-11	1.85326e-11	3.68267e-11	1.39467e-11	1.77921e-11	1.47686e-11	4.34955e-11	1.48194e-11	1.65416e-11	1.68937e-11		1.95978e-11		1.83999e-11
31.98	1.3476e-11	1.76995e-11	2.36594e-11	1.60576e-11	1.72223e-11	1.85282e-11	3.68299e-11	1.39421e-11	1.77888e-11	1.47701e-11	4.3493e-11	1.48232e-11	1.65378e-11	1.68932e-11		1.95942e-11		1.83968e-11
32	1.3481e-11	1.77059e-11	2.36435e-11	1.60529e-11	1.72207e-11	1.8529e-11	3.68314e-11	1.39426e-11	1.77901e-11	1.47747e-11	4.34953e-11	1.48237e-11	1.65382e-11	1.68951e-11		1.95953e-11		1.83956e-11
32.02	1.3474e-11	1.76914e-11	2.36551e-11	1.60535e-11	1.72229e-11	1.85319e-11	3.68329e-11	1.39486e-11	1.77878e-11	1.47749e-11	4.34907e-11	1.48283e-11	1.65406e-11	1.68942e-11		1.95975e-11		1.83923e-11
32.04	1.34804e-11	1.77007e-11	2.36633e-11	1.60506e-11	1.72234e-11	1.85299e-11	3.68205e-11	1.39444e-11	1.77876e-11	1.47756e-11	4.34959e-11	1.48247e-11	1.65384e-11	1.6895e-11		1.96008e-11		1.83986e-11
32.06	1.34786e-11	1.76945e-11	2.36586e-11	1.60529e-11	1.72214e-11	1.8528e-11	3.68291e-11	1.39544e-11	1.77837e-11	1.47718e-11	4.34928e-11	1.48227e-11	1.65375e-11	1.68985e-11		1.95993e-11		1.83988e-11
32.08	1.34763e-11	1.77083e-11	2.36548e-11	1.6053e-11	1.72238e-11	1.85413e-11	3.68336e-11	1.39556e-11	1.77851e-11	1.47739e-11	4.35059e-11	1.48238e-11	1.65377e-11	1.68993e-11		1.95936e-11		1.83938e-11
32.1	1.34784e-11	1.77019e-11	2.3664e-11	1.60525e-11	1.72248e-11	1.85511e-11	3.68318e-11	1.39589e-11	1.77861e-11	1.47752e-11	4.35103e-11	1.48251e-11	1.65376e-11	1.68975e-11		1.95955e-11		1.83909e-11
32.12	1.34816e-11	1.76955e-11	2.36481e-11	1.60522e-11	1.72244e-11	1.8558e-11	3.68333e-11	1.39578e-11	1.77917e-11	1.47768e-11	4.35059e-11	1.48244e-11	1.65398e-11	1.68973e-11		1.95901e-11		1.83966e-11
32.14	1.34792e-11	1.77029e-11	2.36645e-11	1.60528e-11	1.72229e-11	1.8569e-11	3.68358e-11	1.3953e-11	1.77863e-11	1.47743e-11	4.3495e-11	1.48254e-11	1.6548e-11	1.69023e-11		1.96008e-11		1.83977e-11
32.16	1.34807e-11	1.76984e-11	2.36667e-11	1.60567e-11	1.72292e-11	1.8587e-11	3.68324e-11	1.39542e-11	1.77889e-11	1.4772e-11	4.34993e-11	1.48229e-11	1.65496e-11	1.6898e-11		1.95947e-11		1.84004e-11
32.18	1.34805e-11	1.77055e-11	2.36717e-11	1.60532e-11	1.723e-11	1.8596e-11	3.68293e-11	1.39635e-11	1.77873e-11	1.47711e-11	4.35063e-11	1.48267e-11	1.65394e-11	1.68986e-11		1.95906e-11		1.83976e-11
32.2	1.34792e-11	1.76979e-11	2.36593e-11	1.60475e-11	1.72324e-11	1.8595e-11	3.68364e-11	1.39514e-11	1.77879e-11	1.47712e-11	4.35025e-11	1.4825e-11	1.65386e-11	1.69051e-11		1.9594e-11		1.83942e-11
32.22	1.34837e-11	1.77075e-11	2.36623e-11	1.6048e-11	1.7224e-11	1.86131e-11	3.68411e-11	1.39517e-11	1.77869e-11	1.47704e-11	4.34969e-11	1.48239e-11	1.6547e-11	1.69044e-11		1.9595e-11		1.84048e-11
32.24	1.34799e-11	1.771e-11	2.36607e-11	1.60521e-11	1.7233e-11	1.86189e-11	3.6835e-11	1.39517e-11	1.77869e-11	1.47699e-11	4.35e-11	1.4826e-11	1.65426e-11	1.68939e-11		1.95894e-11		1.83932e-11
32.26	1.34821e-11	1.7703e-11	2.36615e-11	1.60518e-11	1.72263e-11	1.86212e-11	3.68371e-11	1.39414e-11	1.77929e-11	1.47761e-11	4.35138e-11	1.48215e-11	1.65393e-11	1.6901e-11		1.95879e-11		1.83981e-11
32.28	1.34778e-11	1.77041e-11	2.36583e-11	1.60527e-11	1.72331e-11	1.86167e-11	3.68318e-11	1.39507e-11	1.77912e-11	1.47729e-11	4.34983e-11	1.48238e-11	1.65436e-11	1.68982e-11		1.959e-11		1.84077e-11
32.3	1.34781e-11	1.77007e-11	2.36573e-11	1.60474e-11	1.72253e-11	1.86232e-11	3.68338e-11	1.39503e-11	1.779e-11	1.47759e-11	4.35144e-11	1.48228e-11	1.65427e-11	1.68917e-11		1.95923e-11		1.83946e-11
32.32	1.34762e-11	1.77166e-11	2.36646e-11	1.60523e-11	1.72308e-11	1.86161e-11	3.68338e-11	1.39525e-11	1.77856e-11	1.47732e-11	4.34997e-11	1.48245e-11	1.65408e-11	1.68963e-11		1.95885e-11		1.83944e-11
32.34	1.34775e-11	1.7705e-11	2.36608e-11	1.60502e-11	1.72355e-11	1.86154e-11	3.68335e-11	1.39545e-11	1.77894e-11	1.47695e-11	4.35167e-11	1.48222e-11	1.65468e-11	1.68939e-11		1.95914e-11		1.83948e-11
32.36	1.34801e-11	1.77109e-11	2.36681e-11	1.60552e-11	1.72283e-11	1.86252e-11	3.68339e-11	1.39449e-11	1.77892e-11	1.47734e-11	4.35144e-11	1.48285e-11	1.65417e-11	1.68966e-11		1.95885e-11		1.83954e-11
32.38	1.34754e-11	1.77089e-11	2.36575e-11	1.6056e-11	1.72341e-11	1.86281e-11	3.68349e-11	1.39503e-11	1.77831e-11	1.47692e-11	4.35158e-11	1.48242e-11	1.65443e-11	1.69002e-11		1.95892e-11		1.83951e-11
32.4	1.34753e-11	1.77151e-11	2.36609e-11	1.60518e-11	1.7238e-11	1.8629e-11	3.68377e-11	1.39507e-11	1.779e-11	1.47716e-11	4.35226e-11	1.48243e-11	1.65419e-11	1.69039e-11		1.95885e-11		1.83948e-11
32.42	1.34766e-11	1.77151e-11	2.3662e-11	1.60538e-11	1.72342e-11	1.86271e-11	3.68333e-11	1.39544e-11	1.77891e-11	1.47701e-11	4.35148e-11	1.48237e-11	1.6546e-11	1.68961e-11		1.9588e-11		1.83917e-11
32.44	1.34762e-11	1.77113e-11	2.36675e-11	1.60471e-11	1.72318e-11	1.86269e-11	3.68313e-11	1.39455e-11	1.77906e-11	1.47776e-11	4.35328e-11	1.48225e-11	1.65451e-11	1.68979e-11		1.95861e-11		1.83948e-11
32.46	1.34782e-11	1.77169e-11	2.3666e-11	1.60541e-11	1.72316e-11	1.86273e-11	3.68357e-11	1.3945e-11	1.77917e-11	1.47741e-11	4.35386e-11	1.48244e-11	1.65471e-11	1.69019e-11		1.95963e-11		1.83991e-11
32.48	1.34771e-11	1.77142e-11	2.36712e-11	1.60491e-11	1.72344e-11	1.86226e-11	3.68358e-11	1.39553e-11	1.77887e-11	1.47712e-11	4.35312e-11	1.4823e-11	1.6548e-11	1.69004e-11		1.95925e-11		1.83944e-11
32.5	1.34827e-11	1.77172e-11	2.36569e-11	1.60512e-11	1.72366e-11	1.8626e-11	3.68354e-11	1.3958e-11	1.77913e-11	1.47726e-11	4.35314e-11	1.48268e-11	1.65429e-11	1.68987e-11		1.95899e-11		1.83914e-11
32.52	1.34786e-11	1.77215e-11	2.36684e-11	1.60538e-11	1.72384e-11	1.86241e-11	3.68352e-11	1.39584e-11	1.77811e-11	1.47704e-11	4.35244e-11	1.48237e-11	1.65439e-11	1.69031e-11		1.95973e-11		1.83877e-11
32.54	1.34802e-11	1.77162e-11	2.3675e-11	1.60488e-11	1.72374e-11	1.86281e-11	3.68323e-11	1.39494e-11	1.77859e-11	1.47746e-11	4.35095e-11	1.48276e-11	1.65462e-11	1.69054e-11		1.95898e-11		1.83968e-11
32.56	1.348e-11	1.77234e-11	2.36664e-11	1.60543e-11	1.72493e-11	1.86173e-11	3.68356e-11	1.39497e-11	1.7787e-11	1.47764e-11	4.35273e-11	1.48243e-11	1.65398e-11	1.69007e-11		1.95844e-11		1.83971e-11
32.58	1.34786e-11	1.77141e-11	2.36626e-11	1.60569e-11	1.72371e-11	1.86226e-11	3.68353e-11	1.39567e-11	1.77865e-11	1.47755e-11	4.35255e-11	1.48221e-11	1.65414e-11	1.69088e-11		1.95861e-11		1.83968e-11
32.6	1.34788e-11	1.77197e-11	2.36618e-11	1.60504e-11	1.72397e-11	1.8624e-11	3.68327e-11	1.39511e-11	1.77865e-11	1.47754e-11	4.35148e-11	1.48227e-11	1.65429e-11	1.69121e-11		1.95899e-11		1.83957e-11
32.62	1.34824e-11	1.77184e-11	2.36787e-11	1.60533e-11	1.72407e-11	1.86266e-11	3.68369e-11	1.39509e-11	1.779e-11	1.47707e-11	4.3534e-11	1.48261e-11	1.65445e-11	1.69154e-11		1.95756e-11		1.83935e-11
32.64	1.34878e-11	1.77121e-11	2.36706e-11	1.60585e-11	1.72441e-11	1.86226e-11	3.684e-11	1.39554e-11	1.77936e-11	1.47746e-11	4.35084e-11	1.48272e-11	1.65475e-11	1.69128e-11		1.95563e-11		1.8394e-11
32.66	1.34897e-11	1.77126e-11	2.36755e-11	1.60513e-11	1.72428e-11	1.86246e-11	3.68365e-11	1.39481e-11	1.7787e-11	1.47837e-11	4.35175e-11	1.48237e-11	1.65455e-11	1.69138e-11		1.95535e-11		1.83921e-11
32.68	1.34834e-11	1.77107e-11	2.36723e-11	1.60509e-11	1.72435e-11	1.86216e-11	3.68333e-11	1.39517e-11	1.77878e-11	1.47899e-11	4.35306e-11	1.48252e-11	1.65449e-11	1.69103e-11		1.95458e-11		1.83903e-11
32.7	1.34849e-11	1.77171e-11	2.36702e-11	1.60543e-11	1.72532e-11	1.8621e-11	3.68338e-11	1.39496e-11	1.77897e-11	1.4804e-11	4.35171e-11	1.48286e-11	1.65412e-11	1.69115e-11		1.95524e-11		1.83912e-11
32.72	1.34845e-11	1.77154e-11	2.36833e-11	1.60529e-11	1.72426e-11	1.86229e-11	3.68348e-11	1.39469e-11	1.77917e-11	1.48092e-11	4.35402e-11	1.48315e-11	1.65422e-11	1.69164e-11		1.95505e-11		1.83942e-11
32.74	1.34854e-11	1.77145e-11	2.36683e-11	1.60524e-11	1.72491e-11	1.86225e-11	3.68352e-11	1.39508e-11	1.77895e-11	1.4824e-11	4.35236e-11	1.48266e-11	1.65379e-11	1.69102e-11		1.95578e-11		1.83875e-11
32.76	1.34836e-11	1.77198e-11	2.36578e-11	1.60517e-11	1.72479e-11	1.86234e-11	3.68372e-11	1.39511e-11	1.779e-11	1.48321e-11	4.35189e-11	1.48333e-11	1.65429e-11	1.69113e-11		1.95597e-11		1.83938e-11
32.78	1.34866e-11	1.77114e-11	2.36632e-11	1.60478e-11	1.72478e-11	1.86146e-11	3.6835e-11	1.39572e-11	1.77848e-11	1.48348e-11	4.35297e-11	1.48272e-11	1.65426e-11	1.69209e-11		1.95667e-11		1.83916e-11
32.8	1.34837e-11	1.77202e-11	2.36624e-11	1.60493e-11	1.72523e-11	1.86104e-11	3.68311e-11	1.39512e-11	1.77877e-11	1.48474e-11	4.35261e-11	1.48315e-11	1.65411e-11	1.69169e-11		1.9577e-11		1.83901e-11
32.82	1.34845e-11	1.77253e-11	2.36672e-11	1.60589e-11	1.72503e-11	1.86196e-11	3.6825e-11	1.39547e-11	1.77903e-11	1.48501e-11	4.35303e-11	1.48274e-11	1.65385e-11	1.69205e-11		1.95846e-11		1.8395e-11
32.84	1.34893e-11	1.7732e-11	2.36687e-11	1.60563e-11	1.72531e-11	1.86194e-11	3.68326e-11	1.395e-11	1.77867e-11	1.48567e-11	4.35247e-11	1.48315e-11	1.65336e-11	1.69081e-11		1.9586e-11		1.83908e-11
32.86	1.34866e-11	1.77281e-11	2.36657e-11	1.60525e-11	1.72523e-11	1.86221e-11	3.68287e-11	1.39541e-11	1.77897e-11	1.48592e-11	4.35368e-11	1.48301e-11	1.65397e-11	1.69127e-11		1.96026e-11		1.83934e-11
32.88	1.34906e-11	1.77254e-11	2.36751e-11	1.60539e-11	1.72552e-11	1.86238e-11	3.68332e-11	1.39523e-11	1.77869e-11	1.48611e-11	4.35578e-11	1.48275e-11	1.65429e-11	1.69087e-11		1.9617e-11		1.83952e-11
32.9	1.34796e-11	1.77216e-11	2.36676e-11	1.60589e-11	1.72582e-11	1.86198e-11	3.68352e-11	1.39482e-11	1.77899e-11	1.4853e-11	4.35327e-11	1.48293e-11	1.65461e-11	1.69156e-11		1.96302e-11		1.83918e-11
32.92	1.34869e-11	1.77232e-11	2.36783e-11	1.60537e-11	1.72537e-11	1.86227e-11	3.68303e-11	1.39563e-11	1.77871e-11	1.48574e-11	4.35393e-11	1.48279e-11	1.65441e-11	1.6916e-11		1.96426e-11		1.8392e-11
32.94	1.34829e-11	1.77259e-11	2.36629e-11	1.60515e-11	1.72576e-11	1.86202e-11	3.68344e-11	1.39524e-11	1.77898e-11	1.48543e-11	4.35448e-11	1.48245e-11	1.65461e-11	1.6915e-11		1.96457e-11		1.83957e-11
32.96	1.34818e-11	1.77453e-11	2.3668e-11	1.60495e-11	1.72564e-11	1.86207e-11	3.68261e-11	1.39632e-11	1.77903e-11	1.4859e-11	4.3556e-11	1.4827e-11	1.65408e-11	1.69138e-11		1.96501e-11		1.83885e-11
32.98	1.34867e-11	1.77385e-11	2.36617e-11	1.60578e-11	1.72566e-11	1.86075e-11	3.68415e-11	1.39531e-11	1.77898e-11	1.48555e-11	4.35617e-11	1.48302e-11	1.65445e-11	1.6915e-11		1.96537e-11		1.83952e-11
33	1.34808e-11	1.77559e-11	2.36659e-11	1.60522e-11	1.72538e-11	1.86084e-11	3.68405e-11	1.39581e-11	1.77818e-11	1.48559e-11	4.3577e-11	1.48265e-11	1.65495e-11	1.69187e-11		1.96577e-11		1.83946e-11
33.02	1.34848e-11	1.77372e-11	2.36713e-11	1.6052e-11	1.72558e-11	1.86207e-11	3.68325e-11	1.39489e-11	1.77934e-11	1.48526e-11	4.35735e-11	1.48327e-11	1.65434e-11	1.6923e-11		1.96608e-11		1.83933e-11
33.04	1.34853e-11	1.774e-11	2.36698e-11	1.60498e-11	1.72535e-11	1.86241e-11	3.68298e-11	1.39551e-11	1.77836e-11	1.48531e-11	4.35638e-11	1.48286e-11	1.65488e-11	1.6916e-11		1.96619e-11		1.83978e-11
33.06	1.34872e-11	1.77366e-11	2.36701e-11	1.60548e-11	1.72539e-11	1.8625e-11	3.6834e-11	1.39513e-11	1.77921e-11	1.48561e-11	4.35603e-11	1.48248e-11	1.65449e-11	1.69188e-11		1.96579e-11		1.83952e-11
33.08	1.34859e-11	1.77473e-11	2.36653e-11	1.60545e-11	1.72569e-11	1.86273e-11	3.68321e-11	1.39475e-11	1.77895e-11	1.48537e-11	4.35606e-11	1.4829e-11	1.65534e-11	1.69138e-11		1.96563e-11		1.83958e-11
33.1	1.34839e-11	1.7749e-11	2.36704e-11	1.60585e-11	1.72575e-11	1.86183e-11	3.68381e-11	1.39527e-11	1.77891e-11	1.48537e-11	4.35748e-11	1.48281e-11	1.65539e-11	1.69179e-11		1.96511e-11		1.84012e-11
33.12	1.34846e-11	1.77384e-11	2.36613e-11	1.60627e-11	1.72654e-11	1.86215e-11	3.68352e-11	1.39494e-11	1.77927e-11	1.48504e-11	4.3584e-11	1.4833e-11	1.6551e-11	1.69191e-11		1.96535e-11		1.84028e-11
33.14	1.34852e-11	1.77474e-11	2.3665e-11	1.60597e-11	1.7259e-11	1.86216e-11	3.68316e-11	1.39503e-11	1.7786e-11	1.48581e-11	4.35919e-11	1.4829e-11	1.65598e-11	1.69133e-11		1.96547e-11		1.83986e-11
33.16	1.3485e-11	1.77454e-11	2.36629e-11	1.60518e-11	1.72573e-11	1.8623e-11	3.68374e-11	1.39505e-11	1.77932e-11	1.48527e-11	4.35911e-11	1.48293e-11	1.65565e-11	1.69243e-11		1.96618e-11		1.8392e-11
33.18	1.3486e-11	1.77416e-11	2.36598e-11	1.60509e-11	1.72614e-11	1.8621e-11	3.68382e-11	1.39467e-11	1.77886e-11	1.48528e-11	4.35744e-11	1.48288e-11	1.65567e-11	1.69116e-11		1.96523e-11		1.83981e-11
33.2	1.34901e-11	1.77379e-11	2.36651e-11	1.60549e-11	1.72621e-11	1.86189e-11	3.68357e-11	1.39479e-11	1.77855e-11	1.48478e-11	4.3596e-11	1.48307e-11	1.65599e-11	1.69156e-11		1.96556e-11		1.84007e-11
33.22	1.34874e-11	1.77388e-11	2.3666e-11	1.60589e-11	1.72674e-11	1.86212e-11	3.6839e-11	1.39461e-11	1.77873e-11	1.48497e-11	4.35926e-11	1.48295e-11	1.65571e-11	1.69115e-11		1.9653e-11		1.8403e-11
33.24	1.34892e-11	1.77412e-11	2.36597e-11	1.60526e-11	1.72628e-11	1.86238e-11	3.68349e-11	1.39522e-11	1.77902e-11	1.48508e-11	4.35836e-11	1.48281e-11	1.65575e-11	1.69152e-11		1.96541e-11		1.83934e-11
33.26	1.3486e-11	1.77428e-11	2.36658e-11	1.60611e-11	1.72576e-11	1.86187e-11	3.68319e-11	1.39489e-11	1.77908e-11	1.48451e-11	4.36005e-11	1.48301e-11	1.65534e-11	1.6925e-11		1.96512e-11		1.839e-11
33.28	1.34868e-11	1.77473e-11	2.36633e-11	1.60548e-11	1.72664e-11	1.86198e-11	3.68321e-11	1.39495e-11	1.77906e-11	1.48557e-11	4.35738e-11	1.48306e-11	1.65569e-11	1.69192e-11		1.96515e-11		1.83988e-11
33.3	1.34886e-11	1.77418e-11	2.36677e-11	1.6053e-11	1.7265e-11	1.86217e-11	3.68316e-11	1.39501e-11	1.7803e-11	1.48493e-11	4.35864e-11	1.48274e-11	1.65585e-11	1.69184e-11		1.96503e-11		1.83938e-11
33.32	1.34878e-11	1.77437e-11	2.36634e-11	1.60488e-11	1.72681e-11	1.86231e-11	3.68245e-11	1.39561e-11	1.78159e-11	1.48444e-11	4.35821e-11	1.48287e-11	1.65552e-11	1.69172e-11		1.96508e-11		1.83956e-11
33.34	1.3493e-11	1.77402e-11	2.36604e-11	1.60564e-11	1.72655e-11	1.86271e-11	3.68306e-11	1.39548e-11	1.78317e-11	1.48537e-11	4.36016e-11	1.48265e-11	1.65561e-11	1.69228e-11		1.96549e-11		1.83989e-11
33.36	1.34891e-11	1.77368e-11	2.3665e-11	1.60494e-11	1.72622e-11	1.86248e-11	3.68272e-11	1.3954e-11	1.78574e-11	1.48462e-11	4.35792e-11	1.48307e-11	1.65545e-11	1.69164e-11		1.96494e-11		1.83938e-11
33.38	1.34916e-11	1.77411e-11	2.36637e-11	1.60546e-11	1.7262e-11	1.86271e-11	3.68288e-11	1.3949e-11	1.78783e-11	1.48501e-11	4.3606e-11	1.48324e-11	1.65596e-11	1.6921e-11		1.96502e-11		1.83981e-11
33.4	1.34856e-11	1.77367e-11	2.36683e-11	1.60496e-11	1.72648e-11	1.86256e-11	3.68292e-11	1.39506e-11	1.78946e-11	1.48483e-11	4.36073e-11	1.4829e-11	1.65526e-11	1.69189e-11		1.96493e-11		1.83962e-11
33.42	1.34883e-11	1.77314e-11	2.3666e-11	1.6057e-11	1.72628e-11	1.86234e-11	3.68345e-11	1.3945e-11	1.79134e-11	1.48472e-11	4.35871e-11	1.48322e-11	1.65539e-11	1.6925e-11		1.96527e-11		1.83893e-11
33.44	1.34875e-11	1.77345e-11	2.36636e-11	1.60554e-11	1.72688e-11	1.86216e-11	3.68326e-11	1.39456e-11	1.79279e-11	1.48509e-11	4.36079e-11	1.48379e-11	1.655e-11	1.69244e-11		1.965e-11		1.84023e-11
33.46	1.34835e-11	1.77375e-11	2.36713e-11	1.60582e-11	1.72643e-11	1.86256e-11	3.6833e-11	1.39515e-11	1.79342e-11	1.48567e-11	4.36061e-11	1.48312e-11	1.65539e-11	1.69249e-11		1.96527e-11		1.83998e-11
33.48	1.34889e-11	1.77306e-11	2.3655e-11	1.60516e-11	1.7268e-11	1.8632e-11	3.68337e-11	1.39509e-11	1.79479e-11	1.48522e-11	4.36203e-11	1.48305e-11	1.65547e-11	1.69249e-11		1.96474e-11		1.83983e-11
33.5	1.34868e-11	1.7725e-11	2.36667e-11	1.60494e-11	1.72704e-11	1.8632e-11	3.68332e-11	1.39524e-11	1.79483e-11	1.48493e-11	4.36112e-11	1.48296e-11	1.65539e-11	1.69219e-11		1.96448e-11		1.84e-11
33.52	1.34905e-11	1.77305e-11	2.36674e-11	1.6047e-11	1.7267e-11	1.8627e-11	3.68345e-11	1.39498e-11	1.79502e-11	1.48537e-11	4.36139e-11	1.48287e-11	1.65526e-11	1.69227e-11		1.96542e-11		1.83998e-11
33.54	1.34917e-11	1.77405e-11	2.36601e-11	1.60543e-11	1.72721e-11	1.86297e-11	3.68324e-11	1.39488e-11	1.79489e-11	1.48444e-11	4.36165e-11	1.48307e-11	1.65484e-11	1.69237e-11		1.9647e-11		1.83968e-11
33.56	1.34908e-11	1.77403e-11	2.36628e-11	1.60521e-11	1.7273e-11	1.8628e-11	3.68383e-11	1.39462e-11	1.79462e-11	1.4845e-11	4.36158e-11	1.48291e-11	1.65527e-11	1.69284e-11		1.96454e-11		1.84038e-11
33.58	1.34876e-11	1.77389e-11	2.36586e-11	1.60533e-11	1.72673e-11	1.86303e-11	3.68284e-11	1.39504e-11	1.79468e-11	1.48475e-11	4.36102e-11	1.48294e-11	1.65502e-11	1.69265e-11		1.96478e-11		1.84033e-11
33.6	1.3492e-11	1.77388e-11	2.36591e-11	1.60599e-11	1.72721e-11	1.86369e-11	3.68282e-11	1.39489e-11	1.79365e-11	1.48449e-11	4.36129e-11	1.48288e-11	1.65575e-11	1.6923e-11		1.96478e-11		1.84012e-11
33.62	1.34847e-11	1.77328e-11	2.36545e-11	1.60546e-11	1.7274e-11	1.86337e-11	3.68229e-11	1.39456e-11	1.79438e-11	1.48534e-11	4.35961e-11	1.48334e-11	1.6561e-11	1.69264e-11		1.96491e-11		1.83967e-11
33.64	1.34834e-11	1.77473e-11	2.36629e-11	1.60491e-11	1.72753e-11	1.86345e-11	3.68232e-11	1.3946e-11	1.79422e-11	1.48462e-11	4.36267e-11	1.4831e-11	1.65549e-11	1.69256e-11		1.96486e-11		1.83986e-11
33.66	1.34851e-11	1.77464e-11	2.3651e-11	1.60542e-11	1.72695e-11	1.86346e-11	3.68296e-11	1.3948e-11	1.79398e-11	1.48477e-11	4.36277e-11	1.48288e-11	1.65601e-11	1.69242e-11		1.96476e-11		1.83981e-11
33.68	1.34891e-11	1.7746e-11	2.36629e-11	1.60531e-11	1.72765e-11	1.86357e-11	3.68284e-11	1.39445e-11	1.79395e-11	1.48479e-11	4.36229e-11	1.48304e-11	1.65548e-11	1.69267e-11		1.96482e-11		1.83928e-11
33.7	1.3487e-11	1.77514e-11	2.36671e-11	1.60557e-11	1.72692e-11	1.86425e-11	3.68279e-11	1.39493e-11	1.79392e-11	1.48452e-11	4.36237e-11	1.48318e-11	1.65548e-11	1.69281e-11		1.96468e-11		1.83987e-11
33.72	1.34892e-11	1.77448e-11	2.36685e-11	1.60538e-11	1.72698e-11	1.86367e-11	3.68351e-11	1.39444e-11	1.7938e-11	1.48519e-11	4.36178e-11	1.483e-11	1.65546e-11	1.693e-11		1.96437e-11		1.84015e-11
33.74	1.34882e-11	1.77501e-11	2.36781e-11	1.60566e-11	1.72692e-11	1.86398e-11	3.68477e-11	1.39512e-11	1.79395e-11	1.485e-11	4.36212e-11	1.48253e-11	1.65545e-11	1.69297e-11		1.96472e-11		1.83963e-11
33.76	1.34878e-11	1.77448e-11	2.3678e-11	1.60574e-11	1.72683e-11	1.86442e-11	3.68643e-11	1.39555e-11	1.79383e-11	1.48502e-11	4.36194e-11	1.48289e-11	1.65525e-11	1.69349e-11		1.96419e-11		1.84011e-11
33.78	1.3488e-11	1.77476e-11	2.36183e-11	1.60513e-11	1.7273e-11	1.8648e-11	3.68917e-11	1.39556e-11	1.79352e-11	1.48486e-11	4.36228e-11	1.48345e-11	1.65556e-11	1.69303e-11		1.96454e-11		1.83996e-11
33.8	1.34872e-11	1.77467e-11	2.36798e-11	1.60504e-11	1.72761e-11	1.86472e-11	3.69306e-11	1.39498e-11	1.79363e-11	1.48471e-11	4.36235e-11	1.48298e-11	1.65546e-11	1.69277e-11		1.96472e-11		1.83936e-11
33.82	1.34862e-11	1.77496e-11	2.36634e-11	1.60542e-11	1.72691e-11	1.86408e-11	3.69623e-11	1.39539e-11	1.7933e-11	1.48467e-11	4.36255e-11	1.48312e-11	1.65547e-11	1.69279e-11		1.96433e-11		1.83961e-11
33.84	1.34925e-11	1.77474e-11	2.36792e-11	1.60611e-11	1.72682e-11	1.86427e-11	3.70033e-11	1.3955e-11	1.79416e-11	1.48439e-11	4.36339e-11	1.48263e-11	1.65504e-11	1.69298e-11		1.96487e-11		1.8396e-11
33.86	1.34942e-11	1.7748e-11	2.36705e-11	1.60528e-11	1.72748e-11	1.86436e-11	3.70279e-11	1.39509e-11	1.79358e-11	1.48479e-11	4.36402e-11	1.48303e-11	1.65531e-11	1.69292e-11		1.96464e-11		1.83976e-11
33.88	1.34907e-11	1.77563e-11	2.36754e-11	1.60556e-11	1.72761e-11	1.86473e-11	3.70574e-11	1.39449e-11	1.7936e-11	1.48524e-11	4.3629e-11	1.48326e-11	1.65551e-11	1.69348e-11		1.96477e-11		1.83955e-11
33.9	1.34869e-11	1.77485e-11	2.36778e-11	1.60531e-11	1.72669e-11	1.86454e-11	3.7081e-11	1.39477e-11	1.79343e-11	1.48536e-11	4.364e-11	1.48311e-11	1.65394e-11	1.69361e-11		1.9644e-11		1.83983e-11
33.92	1.34916e-11	1.77507e-11	2.36935e-11	1.60537e-11	1.72737e-11	1.86475e-11	3.70868e-11	1.39454e-11	1.79317e-11	1.48513e-11	4.36555e-11	1.48289e-11	1.65405e-11	1.69329e-11		1.96468e-11		1.84008e-11
33.94	1.34905e-11	1.77595e-11	2.37212e-11	1.60513e-11	1.72757e-11	1.86471e-11	3.71001e-11	1.39417e-11	1.79296e-11	1.48495e-11	4.36331e-11	1.4833e-11	1.65425e-11	1.69328e-11		1.96496e-11		1.83943e-11
33.96	1.34916e-11	1.77576e-11	2.37489e-11	1.60565e-11	1.72696e-11	1.86511e-11	3.71073e-11	1.39448e-11	1.79353e-11	1.48561e-11	4.3643e-11	1.48277e-11	1.65437e-11	1.69323e-11		1.96448e-11		1.83962e-11
33.98	1.34907e-11	1.77709e-11	2.37604e-11	1.60533e-11	1.72712e-11	1.86515e-11	3.71086e-11	1.39434e-11	1.7936e-11	1.48504e-11	4.36371e-11	1.48349e-11	1.65457e-11	1.69306e-11		1.96491e-11		1.8396e-11
34	1.34869e-11	1.77549e-11	2.37802e-11	1.60536e-11	1.72741e-11	1.86546e-11	3.71046e-11	1.3948e-11	1.79355e-11	1.48505e-11	4.36366e-11	1.48335e-11	1.6546e-11	1.6938e-11		1.96487e-11		1.84015e-11
34.02	1.34875e-11	1.77581e-11	2.38072e-11	1.60508e-11	1.72698e-11	1.86592e-11	3.71141e-11	1.39339e-11	1.79386e-11	1.48539e-11	4.36394e-11	1.48371e-11	1.65434e-11	1.69337e-11		1.96518e-11		1.83945e-11
34.04	1.34854e-11	1.77604e-11	2.38192e-11	1.60558e-11	1.72727e-11	1.86557e-11	3.71129e-11	1.39423e-11	1.7936e-11	1.48532e-11	4.36394e-11	1.48367e-11	1.6541e-11	1.6931e-11		1.96462e-11		1.83955e-11
34.06	1.34868e-11	1.77605e-11	2.38344e-11	1.60547e-11	1.72756e-11	1.86607e-11	3.71058e-11	1.39487e-11	1.79327e-11	1.48578e-11	4.36461e-11	1.48368e-11	1.65385e-11	1.69354e-11		1.96529e-11		1.84001e-11
34.08	1.34883e-11	1.77526e-11	2.38438e-11	1.60538e-11	1.7276e-11	1.86584e-11	3.71061e-11	1.39442e-11	1.79316e-11	1.48582e-11	4.3644e-11	1.48277e-11	1.6536e-11	1.69358e-11		1.96473e-11		1.84004e-11
34.1	1.3489e-11	1.77547e-11	2.3875e-11	1.60543e-11	1.72748e-11	1.86588e-11	3.71135e-11	1.3941e-11	1.79342e-11	1.4859e-11	4.36357e-11	1.48303e-11	1.65418e-11	1.69333e-11		1.96435e-11		1.84036e-11
34.12	1.34917e-11	1.77566e-11	2.38672e-11	1.60468e-11	1.72828e-11	1.86577e-11	3.71069e-11	1.39442e-11	1.79354e-11	1.48539e-11	4.3638e-11	1.48306e-11	1.65457e-11	1.69326e-11		1.96456e-11		1.84051e-11
34.14	1.3488e-11	1.77544e-11	2.38847e-11	1.60552e-11	1.7278e-11	1.86627e-11	3.71078e-11	1.39456e-11	1.79334e-11	1.48604e-11	4.36503e-11	1.48317e-11	1.65393e-11	1.69358e-11		1.96452e-11		1.83962e-11
34.16	1.34887e-11	1.77614e-11	2.38997e-11	1.60578e-11	1.72759e-11	1.86682e-11	3.71139e-11	1.3944e-11	1.79356e-11	1.48596e-11	4.36604e-11	1.48277e-11	1.65459e-11	1.69379e-11		1.96536e-11		1.83955e-11
34.18	1.349e-11	1.77629e-11	2.39023e-11	1.60568e-11	1.72811e-11	1.86624e-11	3.71061e-11	1.395e-11	1.7936e-11	1.4858e-11	4.36479e-11	1.48285e-11	1.65459e-11	1.69325e-11		1.96523e-11		1.84017e-11
34.2	1.34899e-11	1.77557e-11	2.3892e-11	1.60506e-11	1.72744e-11	1.8663e-11	3.71115e-11	1.39483e-11	1.79336e-11	1.4858e-11	4.36504e-11	1.48309e-11	1.65407e-11	1.69369e-11		1.96475e-11		1.84004e-11
34.22	1.34906e-11	1.77541e-11	2.38786e-11	1.60542e-11	1.72708e-11	1.86631e-11	3.71125e-11	1.39484e-11	1.79355e-11	1.48572e-11	4.36557e-11	1.48277e-11	1.65415e-11	1.69298e-11		1.96532e-11		1.84029e-11
34.24	1.34883e-11	1.77547e-11	2.39004e-11	1.60581e-11	1.72832e-11	1.86644e-11	3.71109e-11	1.39486e-11	1.79356e-11	1.48655e-11	4.36236e-11	1.48355e-11	1.65407e-11	1.69365e-11		1.96521e-11		1.83967e-11
34.26	1.34942e-11	1.77513e-11	2.38852e-11	1.60553e-11	1.72836e-11	1.86698e-11	3.71107e-11	1.39489e-11	1.79343e-11	1.48626e-11	4.36505e-11	1.48344e-11	1.65408e-11	1.69279e-11		1.96506e-11		1.84034e-11
34.28	1.34901e-11	1.7759e-11	2.38826e-11	1.60571e-11	1.72777e-11	1.86711e-11	3.71105e-11	1.39472e-11	1.794e-11	1.48647e-11	4.36617e-11	1.48323e-11	1.65375e-11	1.69355e-11		1.96538e-11		1.83962e-11
34.3	1.34949e-11	1.77558e-11	2.38927e-11	1.60521e-11	1.7283e-11	1.86715e-11	3.71121e-11	1.39445e-11	1.79371e-11	1.4867e-11	4.36452e-11	1.4831e-11	1.65414e-11	1.69427e-11		1.96599e-11		1.83909e-11
34.32	1.34915e-11	1.77646e-11	2.3893e-11	1.6052e-11	1.72778e-11	1.86717e-11	3.71086e-11	1.39548e-11	1.79345e-11	1.48695e-11	4.36381e-11	1.48315e-11	1.65388e-11	1.69356e-11		1.96582e-11		1.83973e-11
34.34	1.34899e-11	1.77697e-11	2.38853e-11	1.60528e-11	1.72804e-11	1.86754e-11	3.71033e-11	1.39603e-11	1.79371e-11	1.48653e-11	4.36678e-11	1.48381e-11	1.65426e-11	1.69398e-11		1.9661e-11		1.83973e-11
34.36	1.34914e-11	1.7756e-11	2.38828e-11	1.60493e-11	1.72811e-11	1.86766e-11	3.7105e-11	1.39642e-11	1.79362e-11	1.4865e-11	4.36443e-11	1.48302e-11	1.65422e-11	1.69373e-11		1.96585e-11		1.83959e-11
34.38	1.34898e-11	1.7758e-11	2.3887e-11	1.60534e-11	1.72782e-11	1.86742e-11	3.71049e-11	1.39727e-11	1.79353e-11	1.48662e-11	4.3647e-11	1.48379e-11	1.65444e-11	1.69392e-11		1.96534e-11		1.83938e-11
34.4	1.34917e-11	1.77566e-11	2.38866e-11	1.60543e-11	1.72835e-11	1.86784e-11	3.71048e-11	1.3977e-11	1.79409e-11	1.48667e-11	4.36477e-11	1.48388e-11	1.65433e-11	1.69369e-11		1.96601e-11		1.83999e-11
34.42	1.34887e-11	1.77547e-11	2.38854e-11	1.60569e-11	1.72762e-11	1.8674e-11	3.71032e-11	1.3989e-11	1.7933e-11	1.48698e-11	4.365e-11	1.48416e-11	1.65485e-11	1.69395e-11		1.96591e-11		1.8404e-11
34.44	1.34904e-11	1.77523e-11	2.38877e-11	1.60532e-11	1.72769e-11	1.86728e-11	3.70974e-11	1.39972e-11	1.79348e-11	1.48711e-11	4.36451e-11	1.48336e-11	1.65519e-11	1.69447e-11		1.96599e-11		1.83986e-11
34.46	1.34883e-11	1.77646e-11	2.38787e-11	1.60501e-11	1.72792e-11	1.86714e-11	3.70967e-11	1.40068e-11	1.79364e-11	1.48712e-11	4.36477e-11	1.48357e-11	1.65422e-11	1.69424e-11		1.96575e-11		1.84011e-11
34.48	1.3484e-11	1.77619e-11	2.38866e-11	1.60479e-11	1.72794e-11	1.86658e-11	3.70913e-11	1.40095e-11	1.794e-11	1.48737e-11	4.36518e-11	1.48389e-11	1.65459e-11	1.69408e-11		1.96538e-11		1.83958e-11
34.5	1.34888e-11	1.77596e-11	2.38884e-11	1.60509e-11	1.72792e-11	1.86623e-11	3.70976e-11	1.40096e-11	1.79332e-11	1.48749e-11	4.36472e-11	1.48421e-11	1.6548e-11	1.69451e-11		1.96525e-11		1.83993e-11
34.52	1.34851e-11	1.77655e-11	2.38738e-11	1.60483e-11	1.7274e-11	1.86695e-11	3.70918e-11	1.40017e-11	1.79386e-11	1.48727e-11	4.36462e-11	1.48366e-11	1.656e-11	1.69393e-11		1.96584e-11		1.84053e-11
34.54	1.3487e-11	1.77611e-11	2.38777e-11	1.60475e-11	1.72772e-11	1.86718e-11	3.70958e-11	1.40046e-11	1.79346e-11	1.48762e-11	4.36467e-11	1.48407e-11	1.65528e-11	1.69323e-11		1.96595e-11		1.84009e-11
34.56	1.34898e-11	1.77619e-11	2.38813e-11	1.60496e-11	1.72842e-11	1.86689e-11	3.70904e-11	1.40092e-11	1.79415e-11	1.48756e-11	4.36528e-11	1.48427e-11	1.65516e-11	1.694e-11		1.96574e-11		1.83932e-11
34.58	1.34837e-11	1.77583e-11	2.38733e-11	1.60527e-11	1.72808e-11	1.86722e-11	3.70914e-11	1.40136e-11	1.79432e-11	1.48776e-11	4.36407e-11	1.48444e-11	1.65593e-11	1.69372e-11		1.96574e-11		1.83962e-11
34.6	1.34896e-11	1.77623e-11	2.38851e-11	1.60513e-11	1.72822e-11	1.86825e-11	3.70808e-11	1.40078e-11	1.79455e-11	1.48761e-11	4.36495e-11	1.48402e-11	1.6556e-11	1.69409e-11		1.96616e-11		1.83975e-11
34.62	1.34868e-11	1.77611e-11	2.38798e-11	1.60553e-11	1.72824e-11	1.86855e-11	3.70867e-11	1.40091e-11	1.79466e-11	1.48768e-11	4.3661e-11	1.48423e-11	1.65493e-11	1.69452e-11		1.96548e-11		1.83965e-11
34.64	1.34887e-11	1.77631e-11	2.38715e-11	1.60528e-11	1.72812e-11	1.8683e-11	3.70862e-11	1.40108e-11	1.79478e-11	1.4876e-11	4.3662e-11	1.48447e-11	1.65447e-11	1.69439e-11		1.96586e-11		1.84024e-11
34.66	1.34876e-11	1.77579e-11	2.38777e-11	1.60561e-11	1.72801e-11	1.86858e-11	3.70894e-11	1.40112e-11	1.79482e-11	1.48825e-11	4.36646e-11	1.48342e-11	1.65346e-11	1.6945e-11		1.9659e-11		1.8397e-11
34.68	1.34912e-11	1.77566e-11	2.38787e-11	1.60524e-11	1.72836e-11	1.86879e-11	3.7084e-11	1.40098e-11	1.79524e-11	1.48775e-11	4.36623e-11	1.48443e-11	1.6539e-11	1.69392e-11		1.96635e-11		1.84046e-11
34.7	1.34878e-11	1.77657e-11	2.38886e-11	1.60531e-11	1.72828e-11	1.86892e-11	3.70886e-11	1.40128e-11	1.79583e-11	1.48813e-11	4.36651e-11	1.48402e-11	1.65339e-11	1.69393e-11		1.96672e-11		1.84018e-11
34.72	1.34915e-11	1.77662e-11	2.3878e-11	1.60543e-11	1.72857e-11	1.86868e-11	3.70919e-11	1.40095e-11	1.79585e-11	1.48794e-11	4.36606e-11	1.4836e-11	1.65378e-11	1.69462e-11		1.96693e-11		1.83989e-11
34.74	1.3491e-11	1.77629e-11	2.38972e-11	1.60549e-11	1.72824e-11	1.86859e-11	3.70883e-11	1.40074e-11	1.79609e-11	1.48815e-11	4.36466e-11	1.48431e-11	1.6533e-11	1.69435e-11		1.96642e-11		1.83976e-11
34.76	1.34949e-11	1.77607e-11	2.38943e-11	1.60513e-11	1.72805e-11	1.86884e-11	3.70922e-11	1.40076e-11	1.79645e-11	1.48795e-11	4.36706e-11	1.48413e-11	1.65328e-11	1.69421e-11		1.96641e-11		1.84054e-11
34.78	1.34905e-11	1.77713e-11	2.38863e-11	1.60598e-11	1.72837e-11	1.86947e-11	3.70949e-11	1.40018e-11	1.79608e-11	1.48781e-11	4.36501e-11	1.4839e-11	1.65371e-11	1.695e-11		1.96688e-11		1.84006e-11
34.8	1.34899e-11	1.77596e-11	2.38786e-11	1.60587e-11	1.72817e-11	1.86897e-11	3.70869e-11	1.40058e-11	1.79632e-11	1.48801e-11	4.36597e-11	1.48381e-11	1.65473e-11	1.69458e-11		1.96717e-11		1.84025e-11
34.82	1.34889e-11	1.77634e-11	2.38907e-11	1.60468e-11	1.72892e-11	1.86923e-11	3.70892e-11	1.40069e-11	1.79666e-11	1.48838e-11	4.36561e-11	1.48419e-11	1.65493e-11	1.69401e-11		1.96646e-11		1.83976e-11
34.84	1.34865e-11	1.77588e-11	2.39039e-11	1.60474e-11	1.72823e-11	1.86915e-11	3.70863e-11	1.40014e-11	1.79706e-11	1.48817e-11	4.36641e-11	1.48429e-11	1.65521e-11	1.69412e-11		1.96703e-11		1.83982e-11
34.86	1.34884e-11	1.77587e-11	2.38852e-11	1.60492e-11	1.72781e-11	1.86922e-11	3.70902e-11	1.40163e-11	1.79697e-11	1.48815e-11	4.36563e-11	1.48357e-11	1.65468e-11	1.69434e-11		1.96678e-11		1.84013e-11
34.88	1.34902e-11	1.77622e-11	2.38909e-11	1.60496e-11	1.7278e-11	1.86954e-11	3.70902e-11	1.40073e-11	1.79734e-11	1.4881e-11	4.36658e-11	1.48411e-11	1.6552e-11	1.6947e-11		1.96637e-11		1.84022e-11
34.9	1.34884e-11	1.77648e-11	2.38976e-11	1.60425e-11	1.72861e-11	1.86949e-11	3.70835e-11	1.40053e-11	1.79724e-11	1.48823e-11	4.36633e-11	1.48481e-11	1.65516e-11	1.69468e-11		1.96635e-11		1.83967e-11
34.92	1.349e-11	1.77585e-11	2.38843e-11	1.60563e-11	1.72836e-11	1.8691e-11	3.70867e-11	1.40144e-11	1.79794e-11	1.48837e-11	4.36693e-11	1.48423e-11	1.65548e-11	1.6947e-11		1.96736e-11		1.83945e-11
34.94	1.34893e-11	1.77568e-11	2.38966e-11	1.60578e-11	1.72818e-11	1.86974e-11	3.70927e-11	1.40046e-11	1.79842e-11	1.48822e-11	4.36626e-11	1.48388e-11	1.65511e-11	1.69409e-11		1.96729e-11		1.84007e-11
34.96	1.34911e-11	1.77602e-11	2.38783e-11	1.60581e-11	1.72928e-11	1.8695e-11	3.70855e-11	1.401e-11	1.79814e-11	1.48874e-11	4.36565e-11	1.48366e-11	1.65613e-11	1.69452e-11		1.96695e-11		1.83958e-11
34.98	1.34858e-11	1.77612e-11	2.38779e-11	1.60514e-11	1.72827e-11	1.86992e-11	3.70822e-11	1.40078e-11	1.79795e-11	1.48855e-11	4.36615e-11	1.48389e-11	1.65592e-11	1.69418e-11		1.96744e-11		1.83897e-11
35	1.3494e-11	1.77569e-11	2.38801e-11	1.6052e-11	1.72862e-11	1.86942e-11	3.70847e-11	1.40147e-11	1.79843e-11	1.48828e-11	4.36698e-11	1.48421e-11	1.65568e-11	1.69406e-11		1.96779e-11		1.83985e-11
35.02	1.349e-11	1.77586e-11	2.3878e-11	1.6056e-11	1.72921e-11	1.86892e-11	3.70941e-11	1.4006e-11	1.80322e-11	1.48912e-11	4.36861e-11	1.4837e-11	1.65594e-11	1.69429e-11		1.96718e-11		1.83917e-11
35.04	1.34903e-11	1.77559e-11	2.38743e-11	1.60535e-11	1.72854e-11	1.8693e-11	3.70862e-11	1.40032e-11	1.80386e-11	1.48912e-11	4.36804e-11	1.48357e-11	1.65566e-11	1.69418e-11		1.96778e-11		1.83994e-11
35.06	1.34884e-11	1.77521e-11	2.38806e-11	1.60607e-11	1.7287e-11	1.86951e-11	3.70886e-11	1.40094e-11	1.80419e-11	1.48918e-11	4.36711e-11	1.48369e-11	1.6556e-11	1.69463e-11		1.96717e-11		1.83976e-11
35.08	1.34939e-11	1.77555e-11	2.389e-11	1.60504e-11	1.72833e-11	1.86898e-11	3.70967e-11	1.40044e-11	1.80424e-11	1.48908e-11	4.3686e-11	1.48381e-11	1.65581e-11	1.69439e-11		1.96778e-11		1.84045e-11
35.1	1.34913e-11	1.77616e-11	2.38784e-11	1.60554e-11	1.72828e-11	1.86994e-11	3.70969e-11	1.40091e-11	1.80474e-11	1.48946e-11	4.36675e-11	1.48362e-11	1.65576e-11	1.69496e-11		1.96732e-11		1.84014e-11
35.12	1.34941e-11	1.77606e-11	2.38909e-11	1.60555e-11	1.72808e-11	1.8695e-11	3.70994e-11	1.40131e-11	1.80474e-11	1.48966e-11	4.36914e-11	1.4837e-11	1.65545e-11	1.69488e-11		1.96764e-11		1.83979e-11
35.14	1.34922e-11	1.77626e-11	2.38751e-11	1.60541e-11	1.72835e-11	1.86973e-11	3.71006e-11	1.40129e-11	1.80432e-11	1.48921e-11	4.36762e-11	1.48334e-11	1.65608e-11	1.6949e-11		1.9684e-11		1.84003e-11
35.16	1.34958e-11	1.77654e-11	2.38621e-11	1.60519e-11	1.72839e-11	1.8695e-11	3.71115e-11	1.40142e-11	1.80524e-11	1.48976e-11	4.36756e-11	1.48324e-11	1.65579e-11	1.69453e-11		1.96814e-11		1.84022e-11
35.18	1.34943e-11	1.77658e-11	2.38778e-11	1.60562e-11	1.72815e-11	1.86976e-11	3.71145e-11	1.40053e-11	1.80486e-11	1.4893e-11	4.36645e-11	1.48365e-11	1.65606e-11	1.69486e-11		1.96858e-11		1.83956e-11
35.2	1.34938e-11	1.77673e-11	2.38848e-11	1.60542e-11	1.72838e-11	1.86984e-11	3.71096e-11	1.40214e-11	1.80514e-11	1.48962e-11	4.36817e-11	1.48333e-11	1.65581e-11	1.69478e-11		1.96823e-11		1.83929e-11
35.22	1.34961e-11	1.77613e-11	2.38731e-11	1.6058e-11	1.72791e-11	1.86961e-11	3.71115e-11	1.40173e-11	1.80573e-11	1.48946e-11	4.36938e-11	1.48382e-11	1.65559e-11	1.69568e-11		1.96844e-11		1.8405e-11
35.24	1.34974e-11	1.77732e-11	2.38828e-11	1.60514e-11	1.72818e-11	1.86994e-11	3.71184e-11	1.40157e-11	1.80499e-11	1.48957e-11	4.36837e-11	1.48332e-11	1.65618e-11	1.69556e-11		1.96813e-11		1.84021e-11
35.26	1.34966e-11	1.77807e-11	2.38816e-11	1.60569e-11	1.72823e-11	1.87014e-11	3.71215e-11	1.40116e-11	1.80577e-11	1.48915e-11	4.36661e-11	1.48335e-11	1.65565e-11	1.69517e-11		1.96852e-11		1.84042e-11
35.28	1.3498e-11	1.77699e-11	2.38895e-11	1.60534e-11	1.72824e-11	1.86971e-11	3.71211e-11	1.40211e-11	1.80573e-11	1.48965e-11	4.36933e-11	1.48346e-11	1.65569e-11	1.69528e-11		1.9684e-11		1.83896e-11
35.3	1.34955e-11	1.77813e-11	2.38966e-11	1.60564e-11	1.72823e-11	1.86975e-11	3.71138e-11	1.40179e-11	1.80533e-11	1.4892e-11	4.36919e-11	1.48427e-11	1.65558e-11	1.69504e-11		1.96799e-11		1.84005e-11
35.32	1.34946e-11	1.77703e-11	2.38816e-11	1.60523e-11	1.72866e-11	1.86971e-11	3.71234e-11	1.40096e-11	1.80579e-11	1.48966e-11	4.3683e-11	1.48384e-11	1.65557e-11	1.69509e-11		1.96885e-11		1.83895e-11
35.34	1.34917e-11	1.77694e-11	2.38801e-11	1.60547e-11	1.72825e-11	1.87005e-11	3.71268e-11	1.40133e-11	1.80593e-11	1.49003e-11	4.3684e-11	1.48385e-11	1.6564e-11	1.69521e-11		1.96843e-11		1.8403e-11
35.36	1.34983e-11	1.77743e-11	2.38827e-11	1.60564e-11	1.72891e-11	1.86979e-11	3.71237e-11	1.40078e-11	1.80559e-11	1.48929e-11	4.36807e-11	1.48357e-11	1.65558e-11	1.69504e-11		1.96869e-11		1.83996e-11
35.38	1.34901e-11	1.77727e-11	2.38967e-11	1.60619e-11	1.72922e-11	1.87055e-11	3.71326e-11	1.40166e-11	1.80617e-11	1.48976e-11	4.36881e-11	1.48386e-11	1.65212e-11	1.69534e-11		1.96876e-11		1.84056e-11
35.4	1.35006e-11	1.77731e-11	2.38859e-11	1.60536e-11	1.7285e-11	1.87055e-11	3.71372e-11	1.40129e-11	1.80639e-11	1.48953e-11	4.36764e-11	1.48361e-11	1.64621e-11	1.69503e-11		1.96893e-11		1.83982e-11
35.42	1.35026e-11	1.77702e-11	2.38837e-11	1.6058e-11	1.72846e-11	1.8702e-11	3.71372e-11	1.40143e-11	1.80616e-11	1.48955e-11	4.36851e-11	1.48411e-11	1.64899e-11	1.69551e-11		1.96885e-11		1.84026e-11
35.44	1.34974e-11	1.77723e-11	2.38827e-11	1.60581e-11	1.72863e-11	1.86987e-11	3.71386e-11	1.40072e-11	1.80598e-11	1.48988e-11	4.36845e-11	1.4842e-11	1.64977e-11	1.69534e-11		1.96877e-11		1.84009e-11
35.46	1.34976e-11	1.77706e-11	2.38879e-11	1.60529e-11	1.72845e-11	1.87068e-11	3.71475e-11	1.40107e-11	1.80653e-11	1.48965e-11	4.36852e-11	1.48418e-11	1.64949e-11	1.69513e-11		1.96889e-11		1.83941e-11
35.48	1.34972e-11	1.77766e-11	2.3882e-11	1.60536e-11	1.72819e-11	1.87163e-11	3.71532e-11	1.40091e-11	1.80607e-11	1.48989e-11	4.36842e-11	1.48418e-11	1.65063e-11	1.69573e-11		1.96885e-11		1.83976e-11
35.5	1.34962e-11	1.77741e-11	2.38903e-11	1.60545e-11	1.7287e-11	1.87123e-11	3.71539e-11	1.40098e-11	1.80645e-11	1.48989e-11	4.36801e-11	1.48352e-11	1.65147e-11	1.69545e-11		1.96839e-11		1.83991e-11
35.52	1.34956e-11	1.77711e-11	2.38861e-11	1.60519e-11	1.72902e-11	1.87153e-11	3.71581e-11	1.40102e-11	1.80672e-11	1.48936e-11	4.36808e-11	1.48416e-11	1.65254e-11	1.69518e-11		1.96858e-11		1.8401e-11
35.54	1.34962e-11	1.77775e-11	2.38932e-11	1.60534e-11	1.72902e-11	1.87201e-11	3.71601e-11	1.40149e-11	1.80619e-11	1.48979e-11	4.36852e-11	1.48434e-11	1.65462e-11	1.69625e-11		1.9689e-11		1.83992e-11
35.56	1.35038e-11	1.77691e-11	2.38914e-11	1.60509e-11	1.72914e-11	1.87157e-11	3.71572e-11	1.40138e-11	1.80716e-11	1.49013e-11	4.36797e-11	1.48368e-11	1.65631e-11	1.69596e-11		1.96897e-11		1.83976e-11
35.58	1.34973e-11	1.77736e-11	2.39003e-11	1.60498e-11	1.72865e-11	1.87151e-11	3.71634e-11	1.40163e-11	1.80688e-11	1.48971e-11	4.36804e-11	1.48407e-11	1.65913e-11	1.69563e-11		1.96883e-11		1.84002e-11
35.6	1.34984e-11	1.77679e-11	2.39197e-11	1.60504e-11	1.72855e-11	1.87173e-11	3.71623e-11	1.40199e-11	1.80712e-11	1.4897e-11	4.36889e-11	1.48421e-11	1.66122e-11	1.6955e-11		1.96882e-11		1.84024e-11
35.62	1.34988e-11	1.77664e-11	2.38972e-11	1.60519e-11	1.72887e-11	1.87157e-11	3.71713e-11	1.40209e-11	1.80753e-11	1.4894e-11	4.36738e-11	1.48452e-11	1.66315e-11	1.6961e-11		1.96882e-11		1.84004e-11
35.64	1.3502e-11	1.77706e-11	2.38904e-11	1.60553e-11	1.72865e-11	1.87162e-11	3.7181e-11	1.40168e-11	1.80718e-11	1.48938e-11	4.36948e-11	1.48421e-11	1.66442e-11	1.69554e-11		1.9693e-11		1.84008e-11
35.66	1.34908e-11	1.77785e-11	2.38976e-11	1.60517e-11	1.72875e-11	1.87182e-11	3.71788e-11	1.40199e-11	1.80713e-11	1.49014e-11	4.36915e-11	1.48359e-11	1.66651e-11	1.69547e-11		1.96907e-11		1.84034e-11
35.68	1.34897e-11	1.77731e-11	2.39082e-11	1.60545e-11	1.72873e-11	1.87147e-11	3.71821e-11	1.40245e-11	1.80742e-11	1.48978e-11	4.36833e-11	1.48391e-11	1.66764e-11	1.69533e-11		1.9692e-11		1.83936e-11
35.7	1.34912e-11	1.77751e-11	2.38968e-11	1.60529e-11	1.72872e-11	1.87147e-11	3.71832e-11	1.4025e-11	1.80718e-11	1.49008e-11	4.36962e-11	1.48413e-11	1.66872e-11	1.69545e-11		1.96945e-11		1.83942e-11
35.72	1.34905e-11	1.77795e-11	2.38979e-11	1.60515e-11	1.72843e-11	1.87185e-11	3.71807e-11	1.40155e-11	1.80759e-11	1.49019e-11	4.37008e-11	1.48449e-11	1.66943e-11	1.69561e-11		1.9689e-11		1.84021e-11
35.74	1.34893e-11	1.77762e-11	2.39039e-11	1.60592e-11	1.72849e-11	1.87061e-11	3.7188e-11	1.40175e-11	1.80718e-11	1.4903e-11	4.36928e-11	1.48402e-11	1.66994e-11	1.696e-11		1.96922e-11		1.84055e-11
35.76	1.3492e-11	1.77837e-11	2.3911e-11	1.6054e-11	1.72893e-11	1.87142e-11	3.71932e-11	1.40333e-11	1.80686e-11	1.49046e-11	4.36879e-11	1.48464e-11	1.67031e-11	1.69576e-11		1.9699e-11		1.84003e-11
35.78	1.34932e-11	1.77813e-11	2.39067e-11	1.60517e-11	1.72903e-11	1.87096e-11	3.71969e-11	1.40262e-11	1.8074e-11	1.49012e-11	4.36971e-11	1.48425e-11	1.67005e-11	1.69505e-11		1.96869e-11		1.84002e-11
35.8	1.34945e-11	1.77832e-11	2.39116e-11	1.60573e-11	1.72965e-11	1.87148e-11	3.72004e-11	1.40357e-11	1.80766e-11	1.48986e-11	4.3692e-11	1.48436e-11	1.66986e-11	1.69586e-11		1.96959e-11		1.83976e-11
35.82	1.34975e-11	1.77769e-11	2.3906e-11	1.60563e-11	1.72866e-11	1.87198e-11	3.71987e-11	1.40255e-11	1.80721e-11	1.49005e-11	4.36925e-11	1.48377e-11	1.66986e-11	1.69569e-11		1.9696e-11		1.84091e-11
35.84	1.34931e-11	1.77718e-11	2.39029e-11	1.60564e-11	1.7296e-11	1.87155e-11	3.72007e-11	1.40312e-11	1.80761e-11	1.4896e-11	4.36996e-11	1.48395e-11	1.67032e-11	1.69634e-11		1.96949e-11		1.84031e-11
35.86	1.35e-11	1.77749e-11	2.39116e-11	1.60545e-11	1.72978e-11	1.87221e-11	3.7203e-11	1.4036e-11	1.80752e-11	1.48979e-11	4.36843e-11	1.48371e-11	1.66955e-11	1.6962e-11		1.9695e-11		1.8407e-11
[truncated: 1,358 more rows]
